# Supplementary material
Source: PubMed Central journal article supplement (PMC3266547)

### **Supplemental Dataset 3**

MochiView image plots of every called significant peak for each regulator are shown in this order: Bcr1, Tec1, Efg1, Ndt80, Rob1, and Brg1.

## **Chromatin immunoprecipitation (ChIP) mapping of genomic Bcr1 binding sites**

Bcr1 Myc-tagged strain CJN1787 vs. untagged wild-type strain SN250 immunoprecipitation binding data were performed under biofilm conditions. The X-axis represents ORF chromosomal locations. The Y-axis is the Agilent normalized enrichment value (log<sub>2</sub>) post-smoothing for the binding of Bcr1. Bcr1-Myc strain (orange line) and untagged wild-type strain (grey dashed line) ChIP-chip array binding data was mapped and plotted onto the chromosomes containing the ORFs shown using MochiView v.1.45 software. All significant called peaks for Bcr1 are indicated by the orange track under the peak (see Supplemental Dataset 2 for exact locations and enrichment values). Peak-finding significance thresholds of  $P \leq 0.001$  were used followed by a user-defined cut-off for the minimum value for peak inclusion post-smoothing set to 0.58 (see MochiView manual for details). Genes plotted above the bold line read in the sense direction; genes plotted below the bold line read in the antisense direction.

[2.341] Ca21chr4:860963-890646 [+] [PGA31, orf19.5300, ECM1, PGA30, orf19.5304]

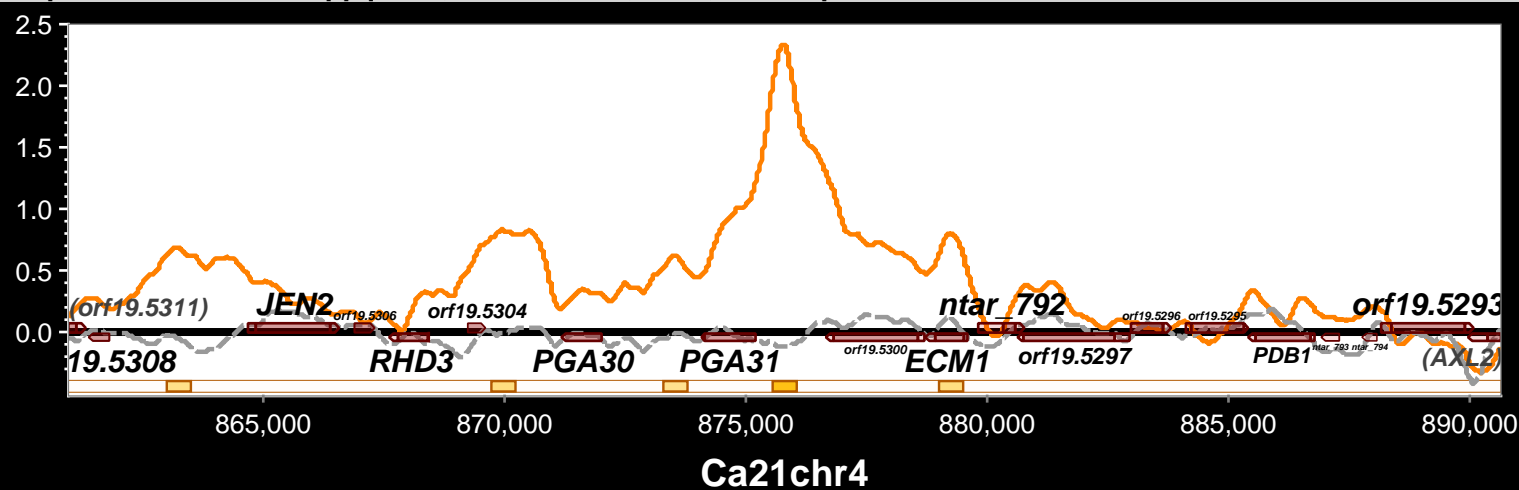

[2.238] Ca21chr1:1076646-1106329 [+] [orf19.449, orf19.448, orf19.446.2, orf19.450, orf19.446.1]

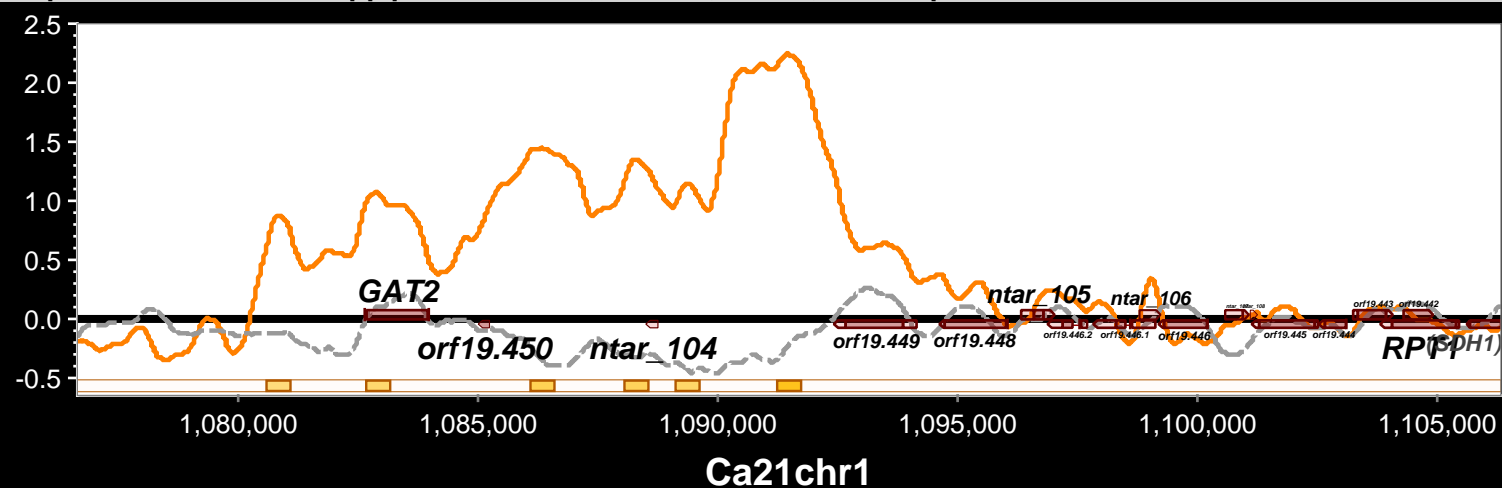

[2.201] Ca21chrR:64585-94268 [+] [orf19.7502, orf19.7501, CDA2, PXA1, orf19.7504]

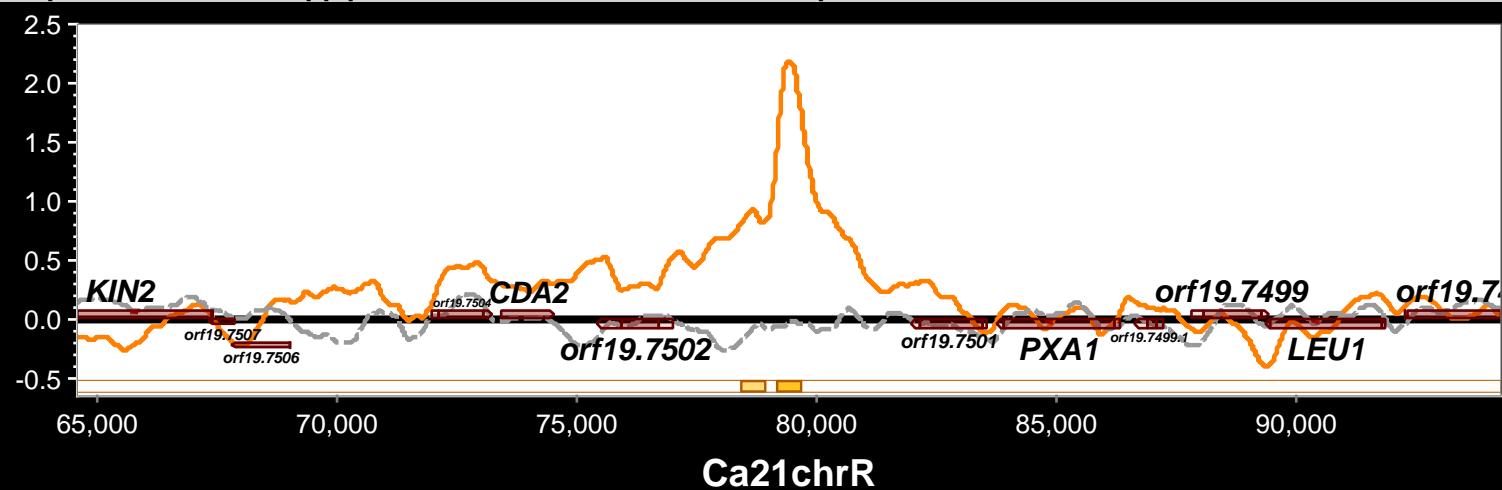

[2.06] Ca21chrR:1702603-1732286 [+] [tG(GCC)1, orf19.612, EFG1, ASF1, orf19.609]

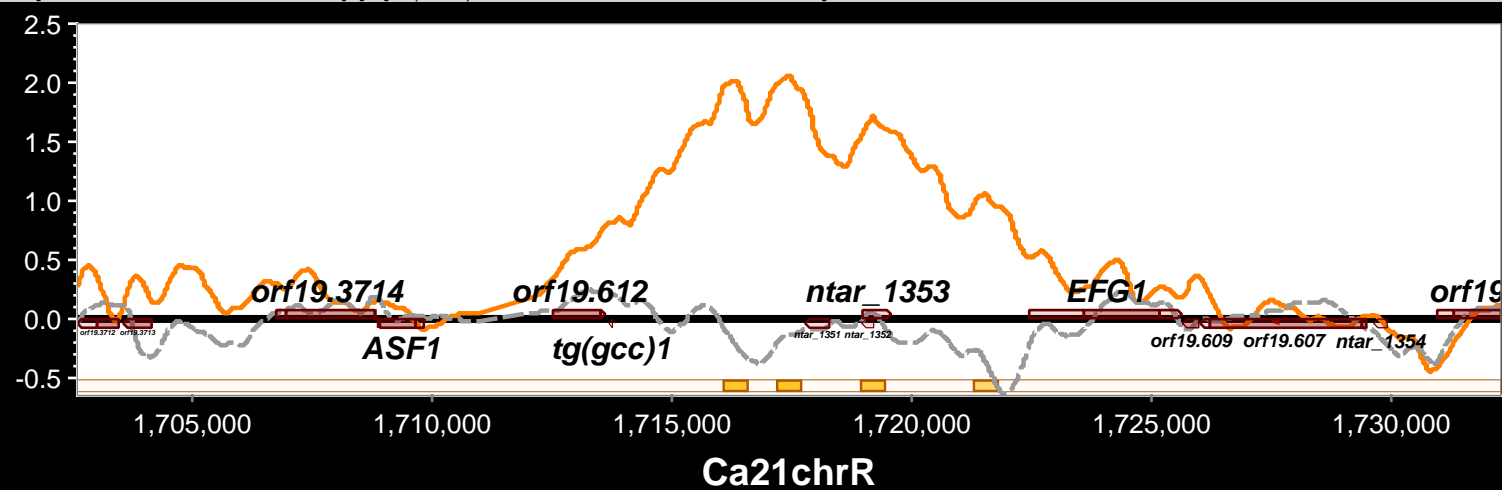



[1.907] Ca21chr1:1314734-1344417 [+] [orf19.1821, orf19.177, orf19.6280, UME6]

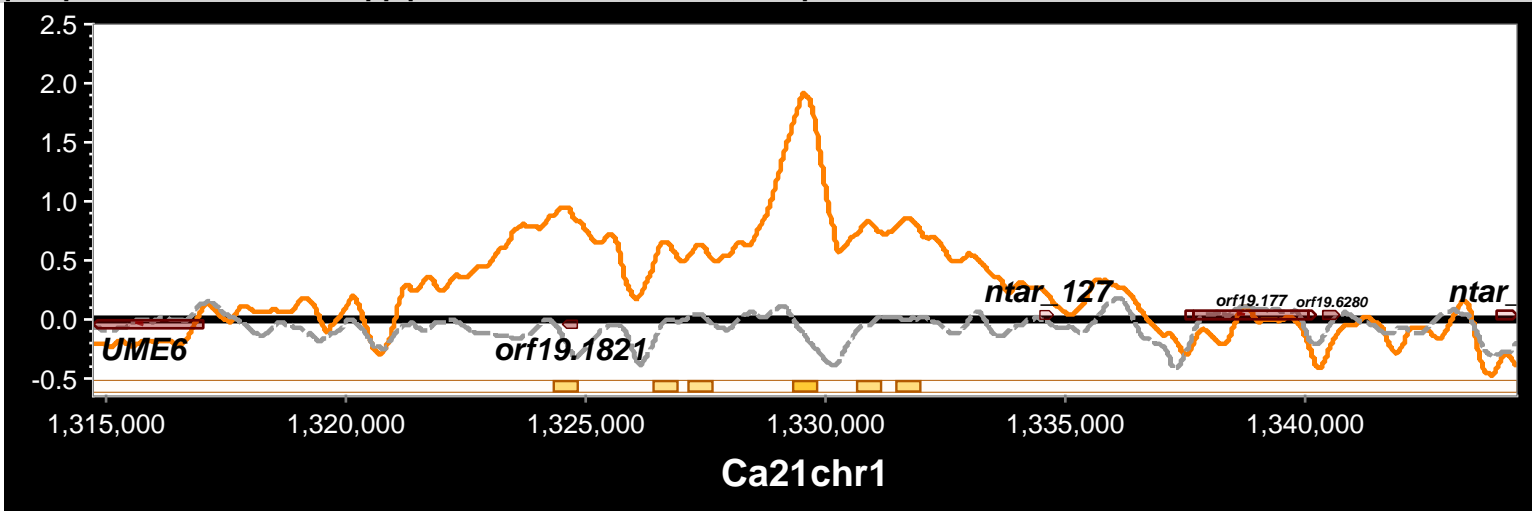

[1.877] Ca21chrR:575331-605014 [+] [orf19.2822, orf19.2821, orf19.2820, orf19.2819, orf19.2818]

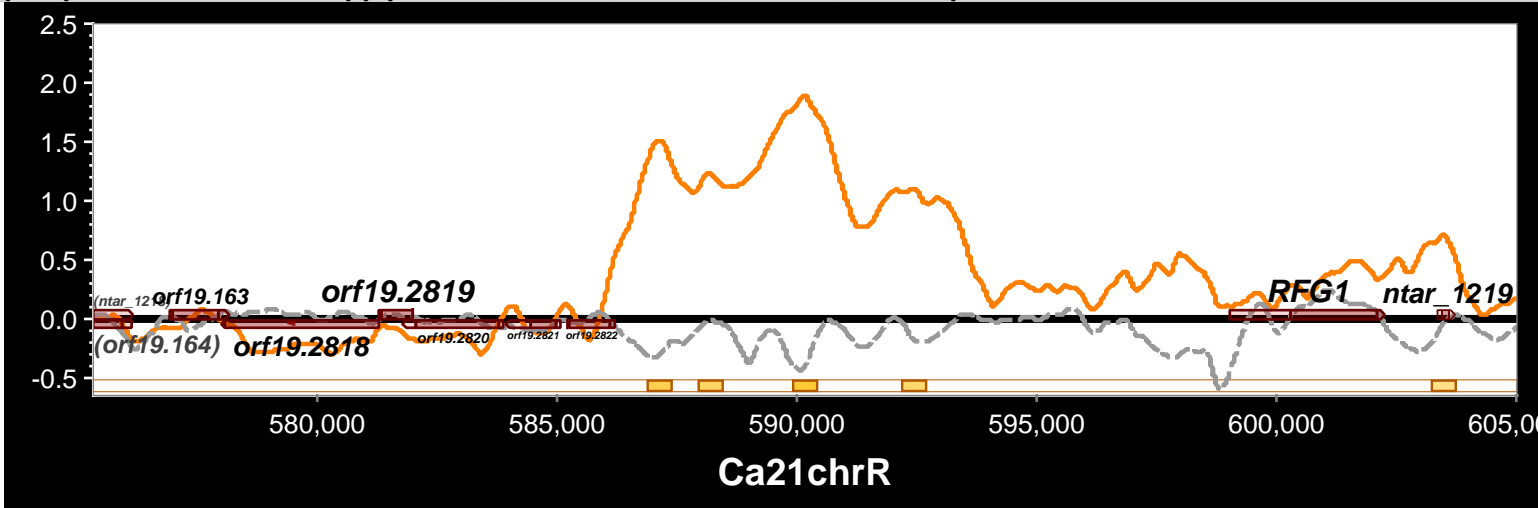

[1.817] Ca21chr3:1744580-1774263 [+] [orf19.6715, orf19.6713, ABD1, orf19.6712, orf19.6717]

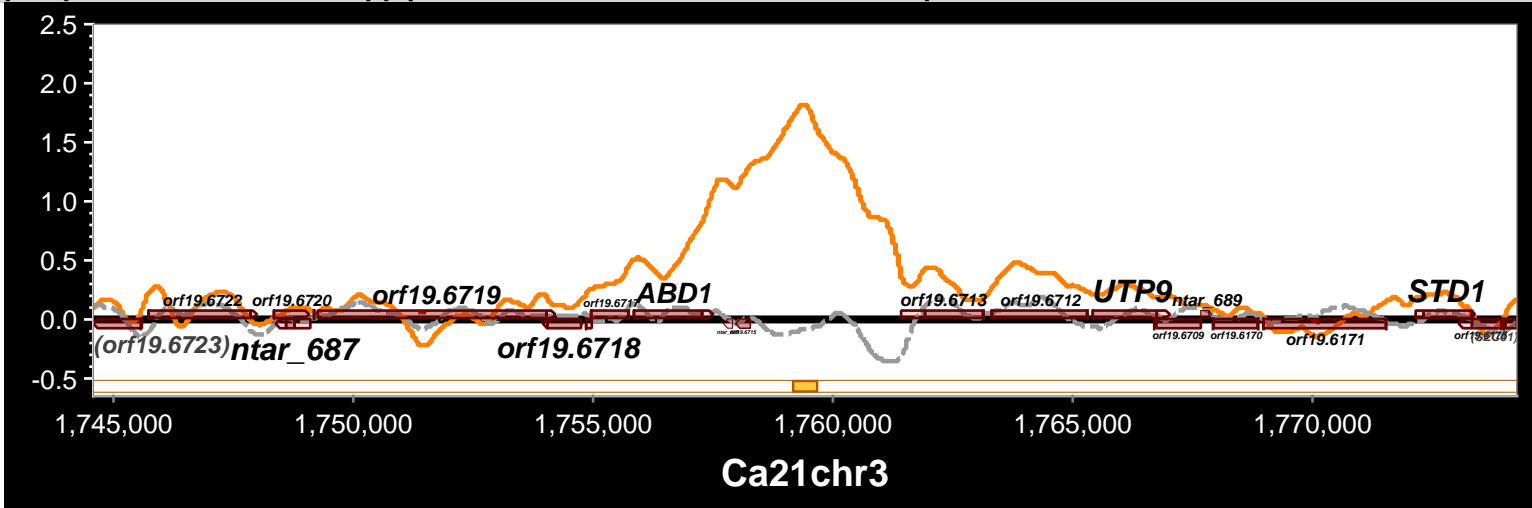

[1.793] Ca21chrR:2154219-2183902 [+] [orf19.7590, FAA4, orf19.7589, orf19.7588, CHT3]

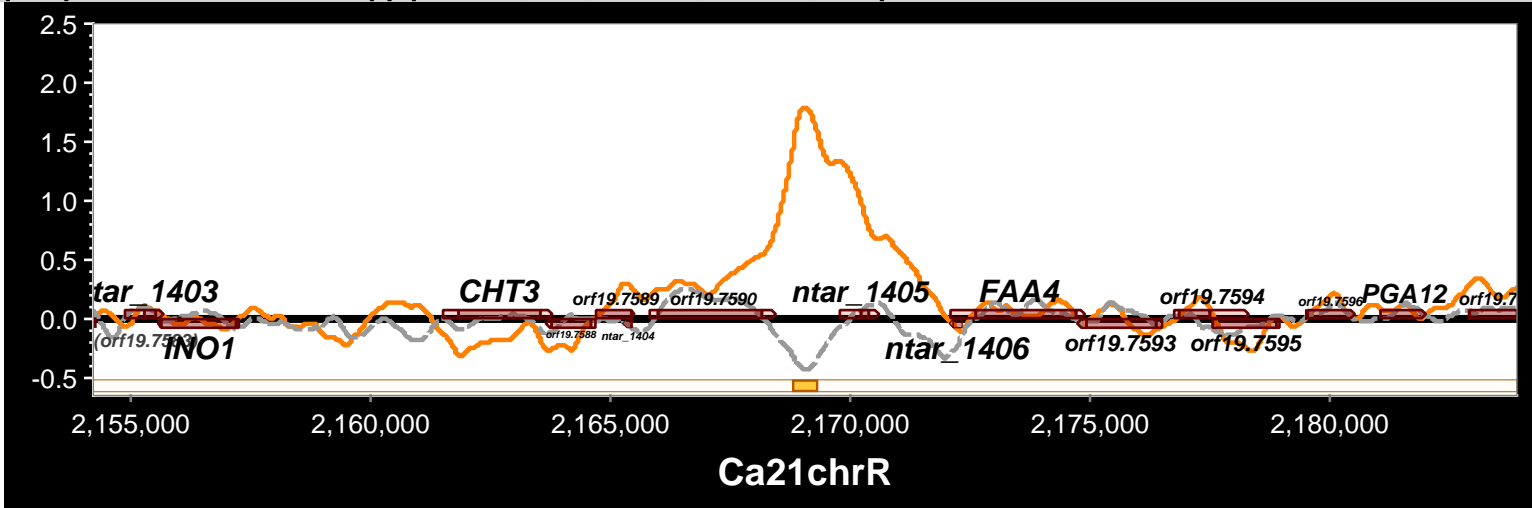

[1.729] Ca21chr4:114177-143860 [+] [orf19.4167, orf19.4166, orf19.4168, orf19.4169, orf19.4170]

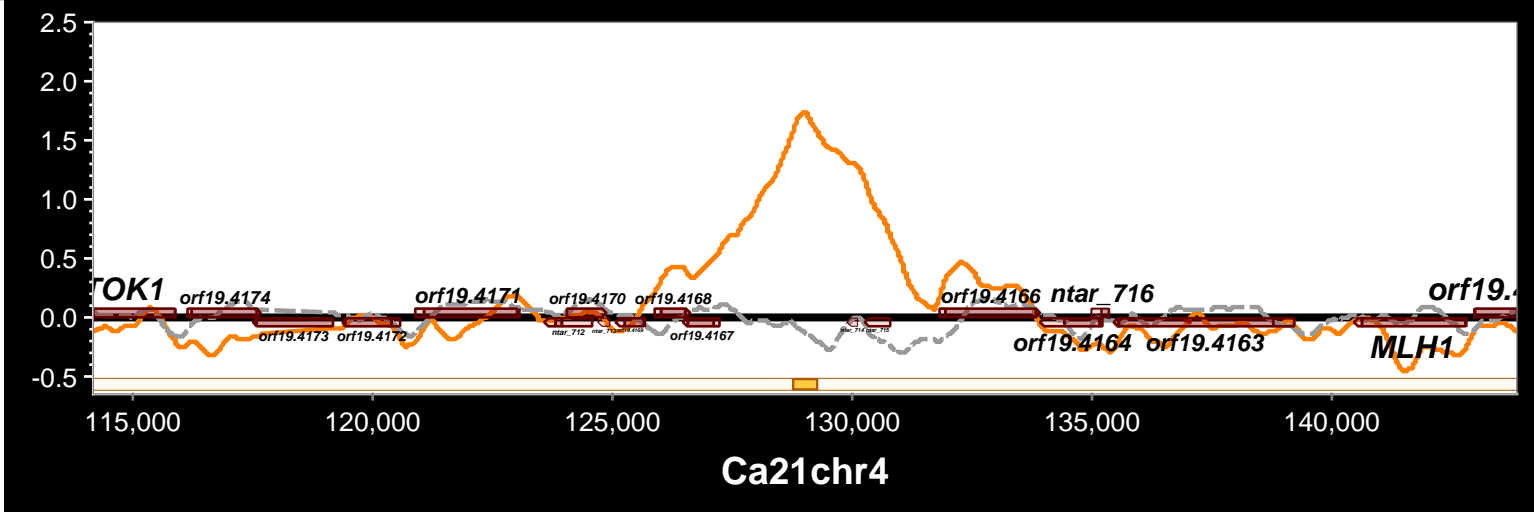

[1.722] Ca21chr7:431262-460945 [+] [CUP9, HSP90, RAD14, orf19.6518, EXO70]

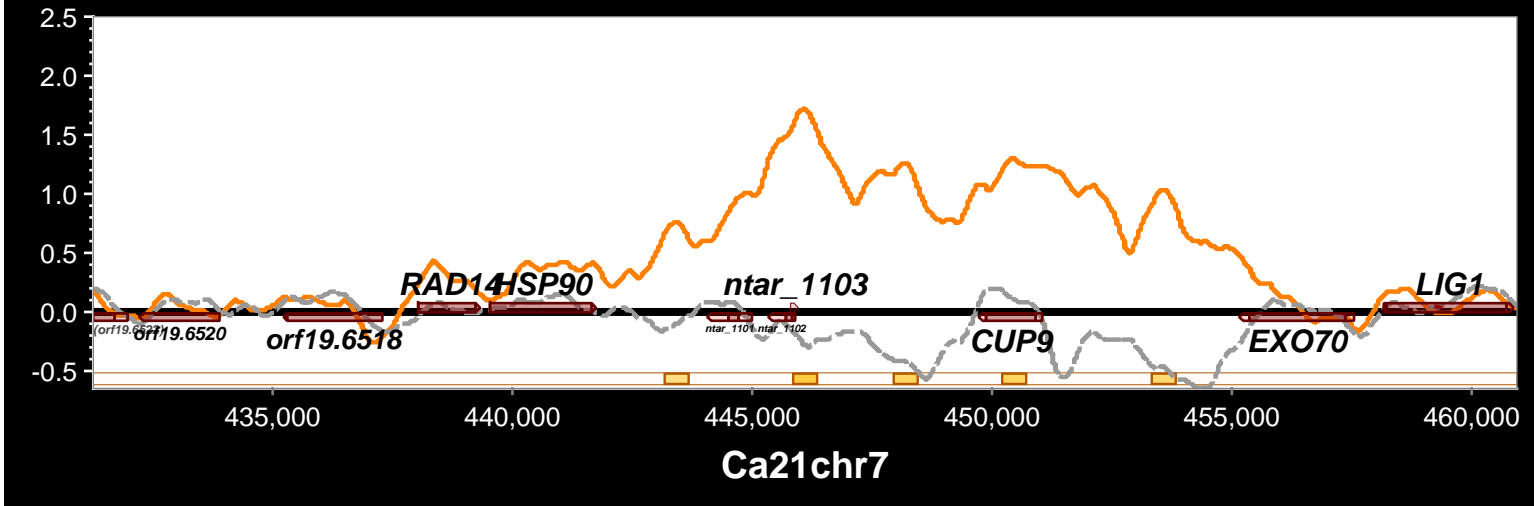

[1.715] Ca21chrR:1297926-1327609 [+] [orf19.3868, orf19.3869, RPL7, ADE13, RFX1]

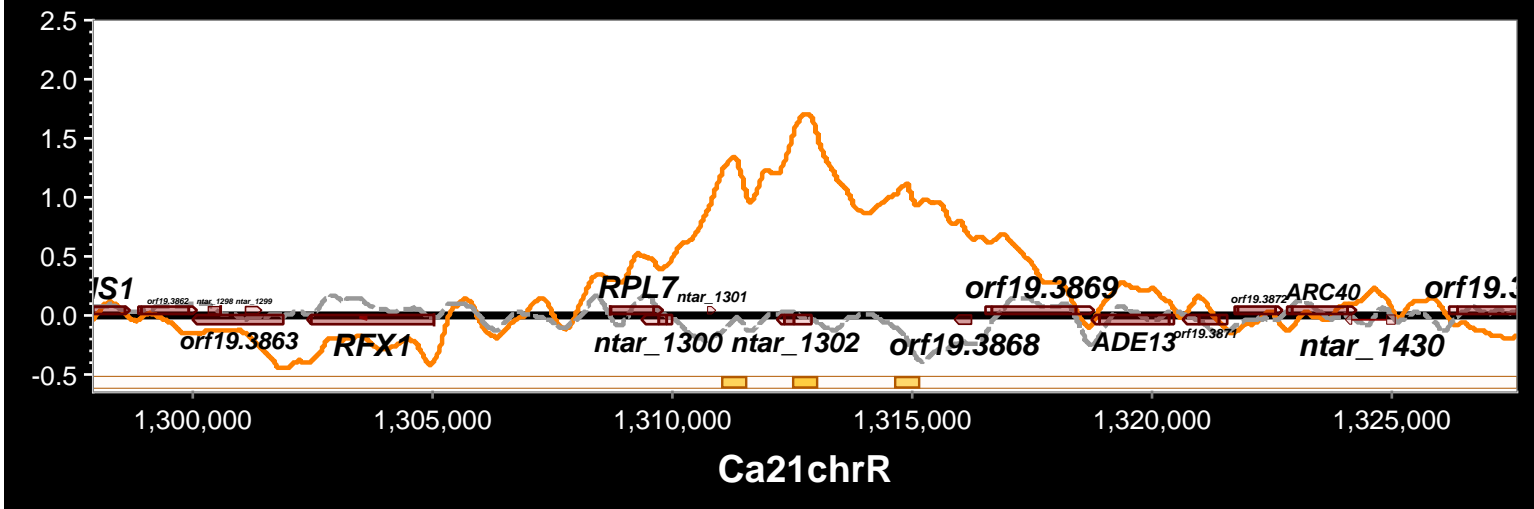

[1.702] Ca21chrR:1704352-1734035 [+] [EFG1, tG(GCC)1, orf19.612, orf19.609, ASF1]

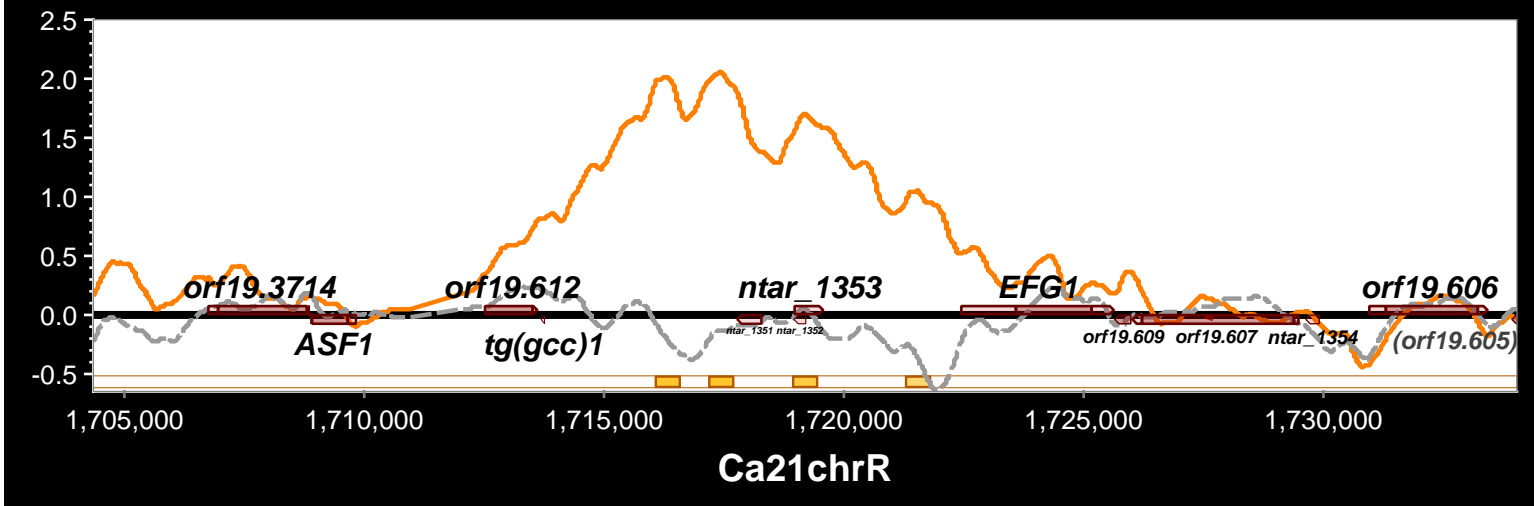

[1.656] Ca21chr3:1707224-1736907 [+] [orf19.6736, orf19.6737, tF(GAA)5, tR(UCU)5, SNR52]

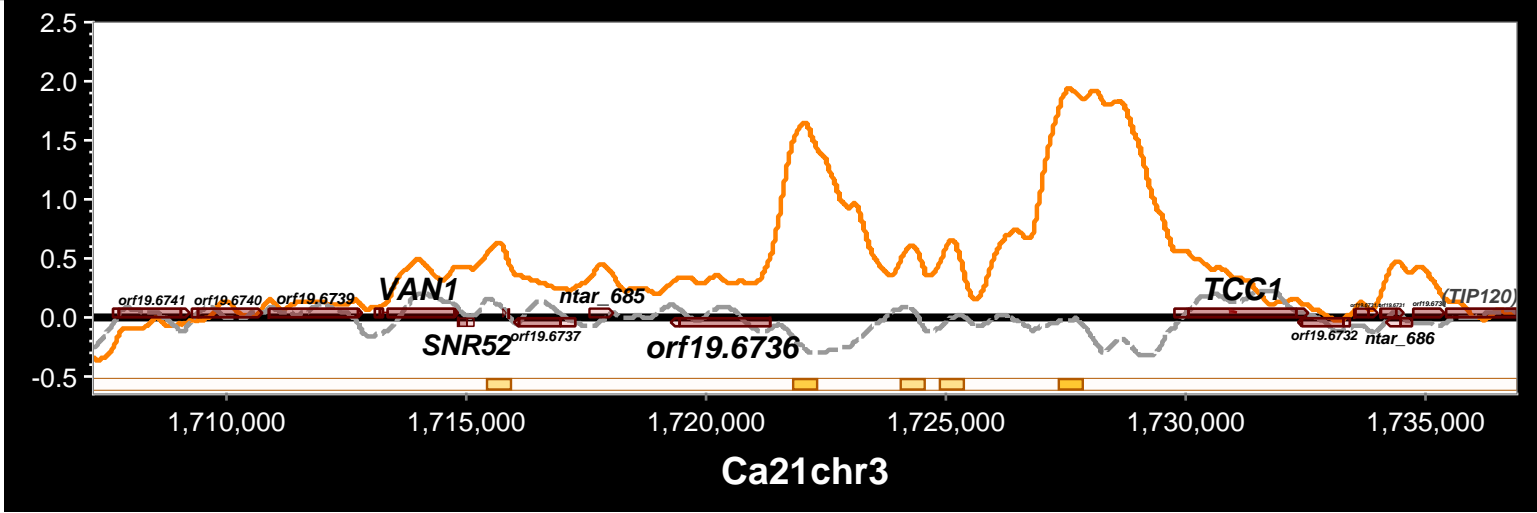

[1.642] Ca21chr3:1110036-1139719 [+] [RHB1, MCA1, RPS19A, WOR2, DYN1]

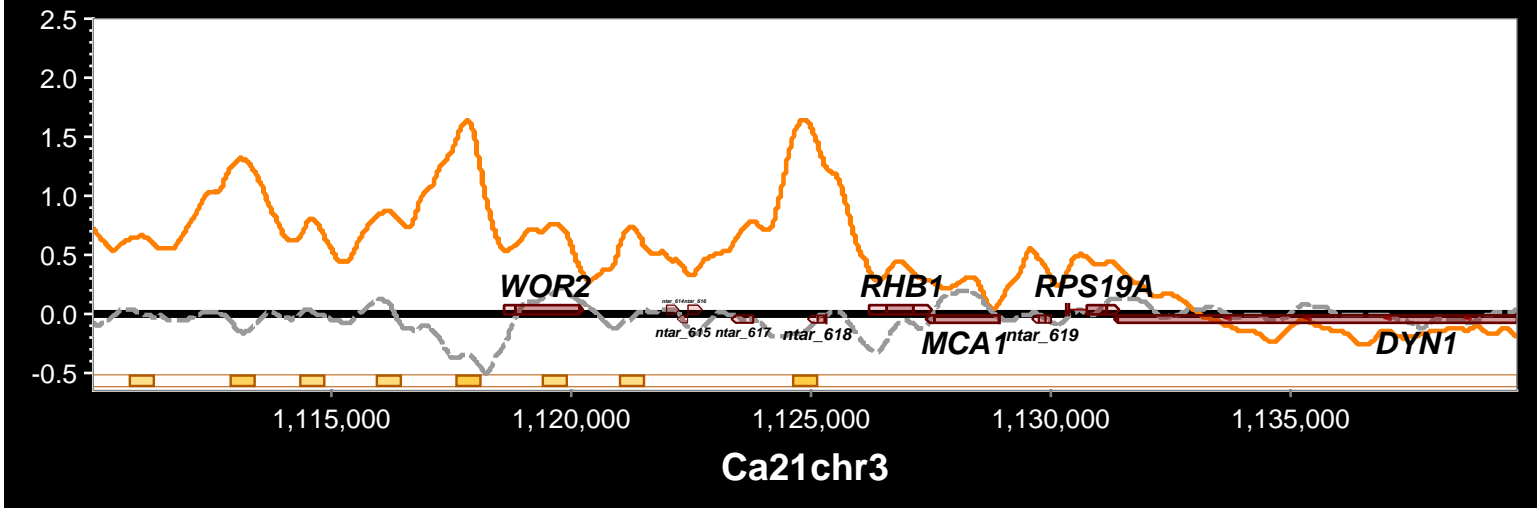

[1.639] Ca21chr3:1103016-1132699 [+] [WOR2, RHB1, orf19.5991, MCA1, RPS19A]

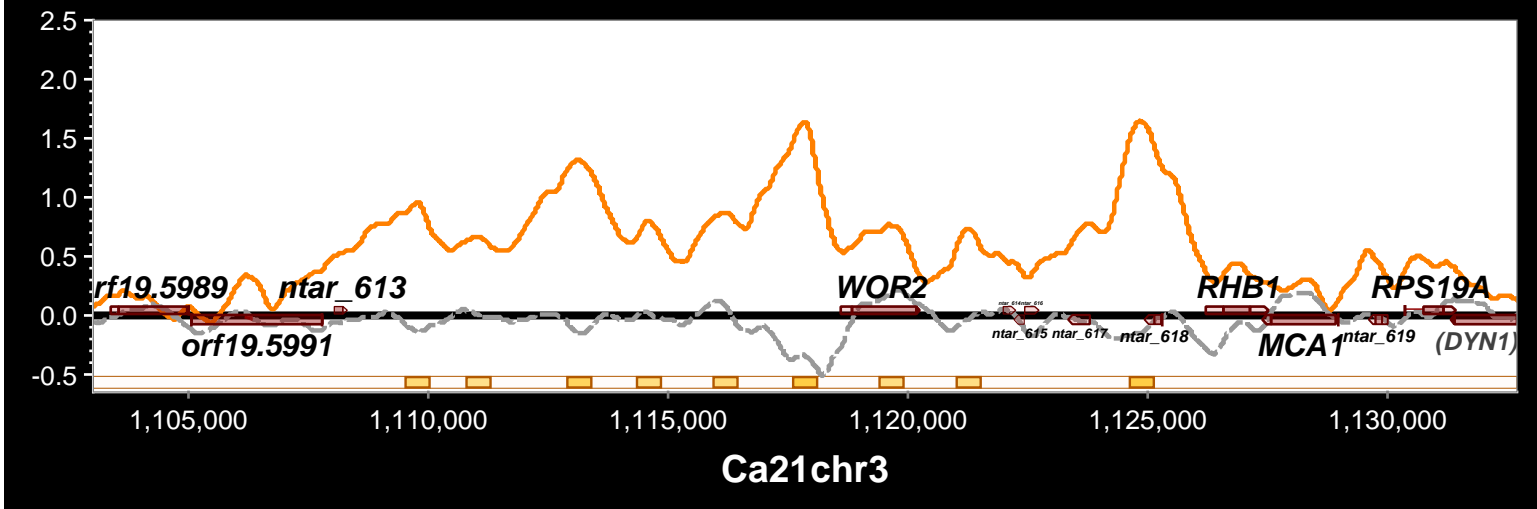

[1.577] Ca21chr7:590979-620662 [+] [PRX1, NIK1, POL3, LIP5, ERG5]

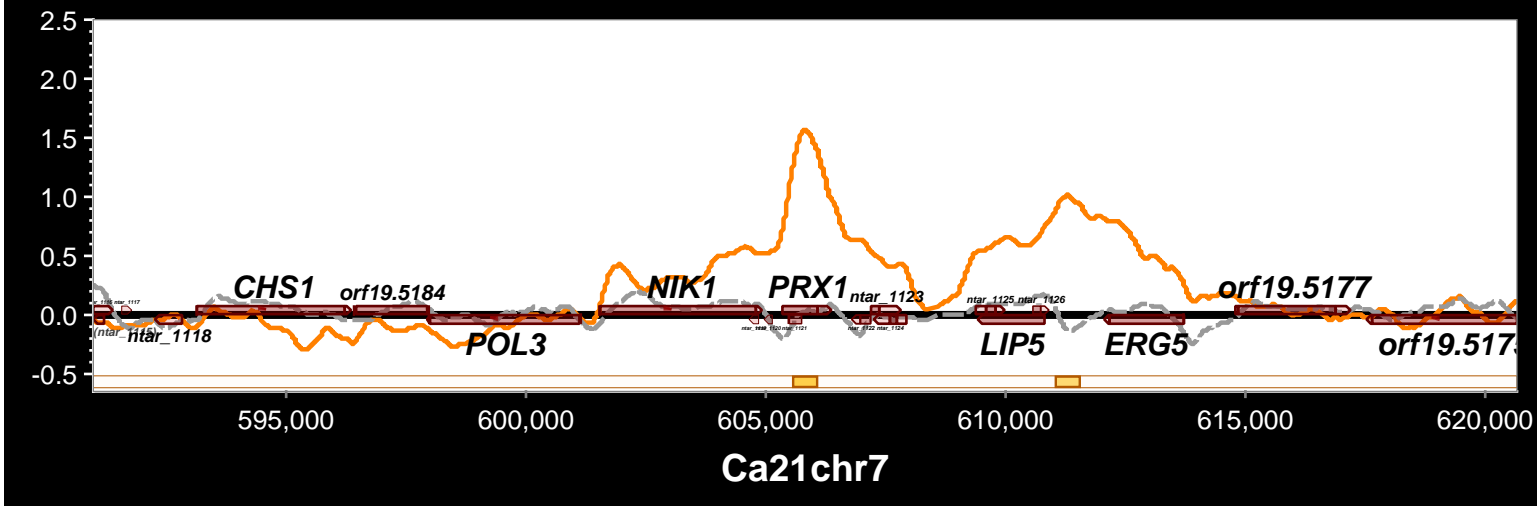

[1.573] Ca21chrR:1514425-1544108 [+] [CRZ2, ALS3, URA2, orf19.1815, orf19.1814]

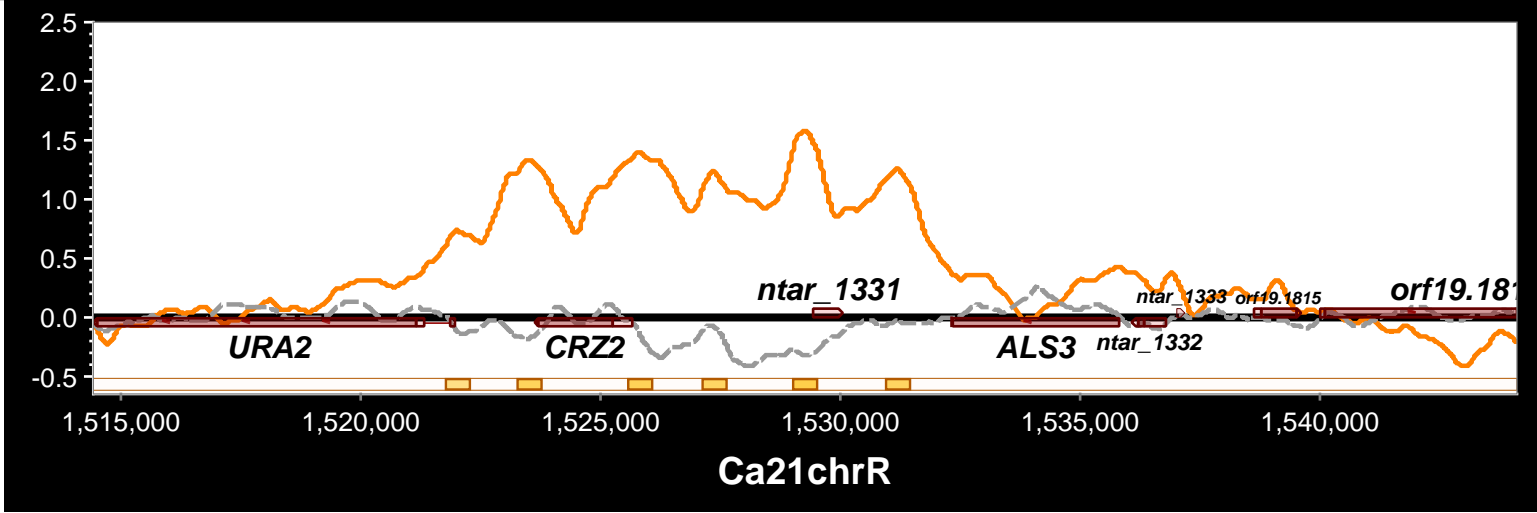

[1.561] Ca21chr1:1032148-1061831 [+] [RHD1, orf19.53, orf19.52, orf19.55, ARG2]

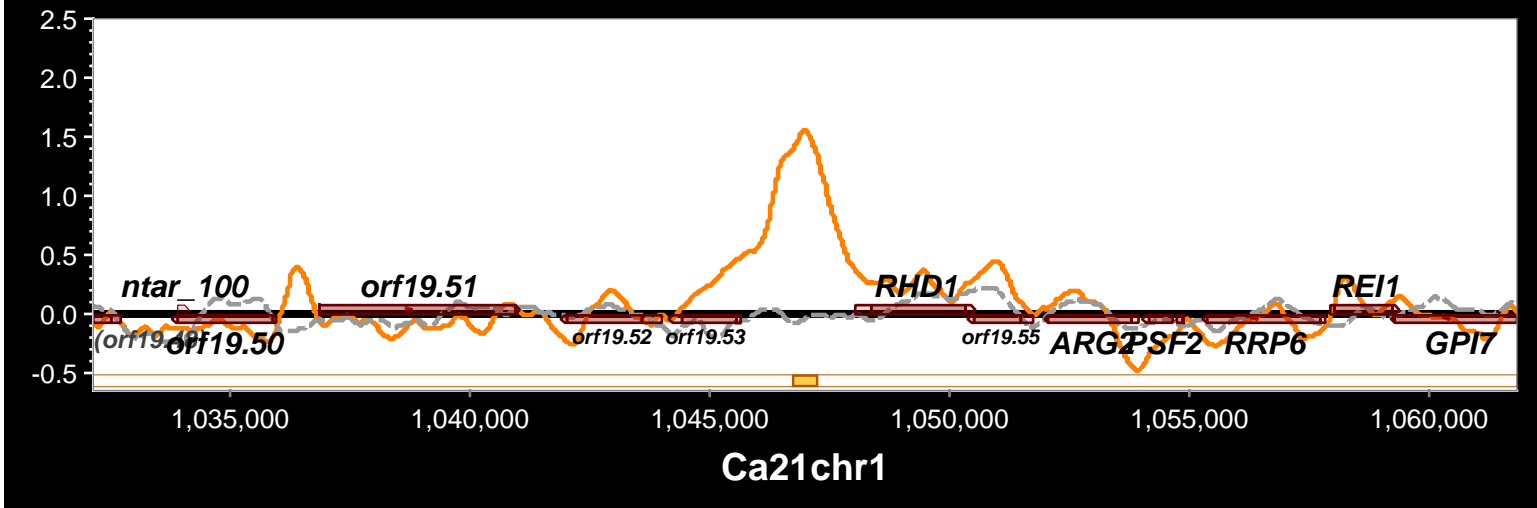

[1.551] Ca21chr3:1343032-1372715 [+] [orf19.7381, orf19.7380, CAM1, FAA2, MNN9]

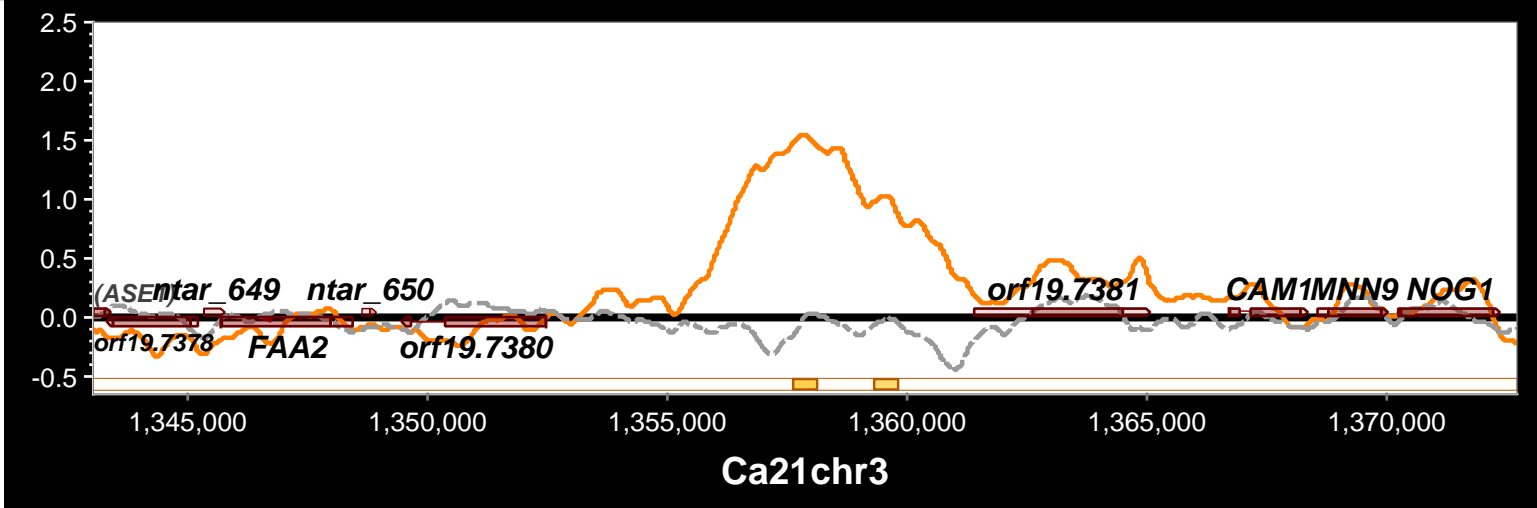

[1.518] Ca21chrR:572298-601981 [+] [orf19.2822, orf19.2821, orf19.2820, orf19.2819, orf19.2818]

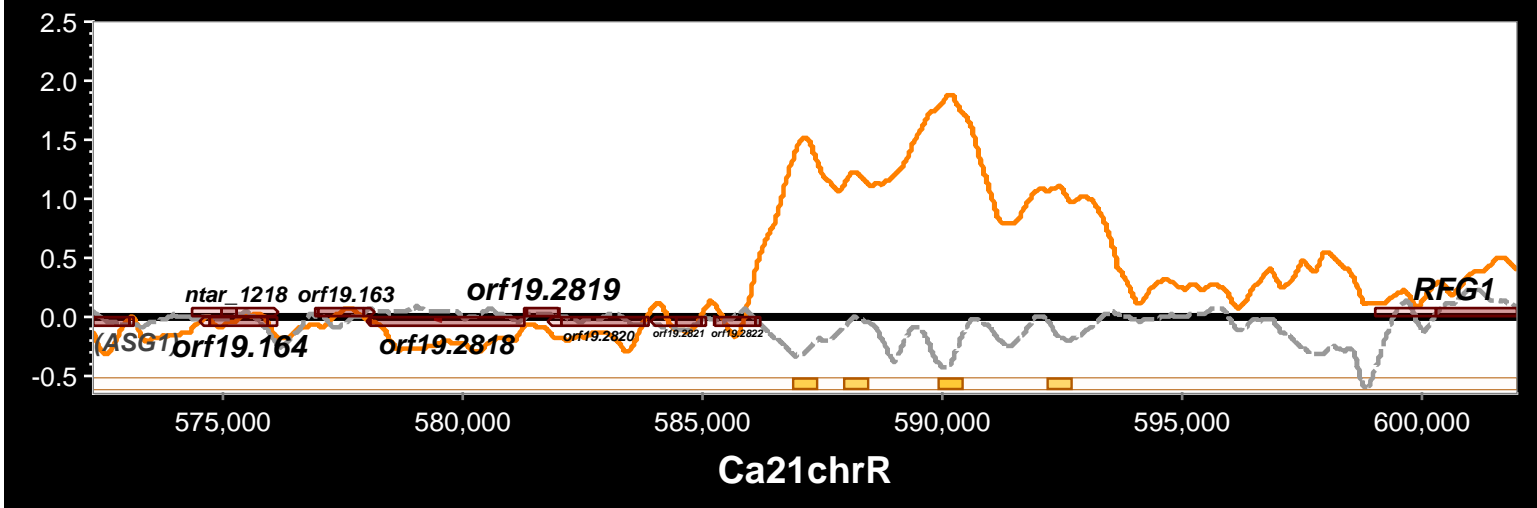



[1.479] Ca21chr5:881663-911346 [+] [orf19.1286, orf19.1285, orf19.1287, FGR42, MEC1]

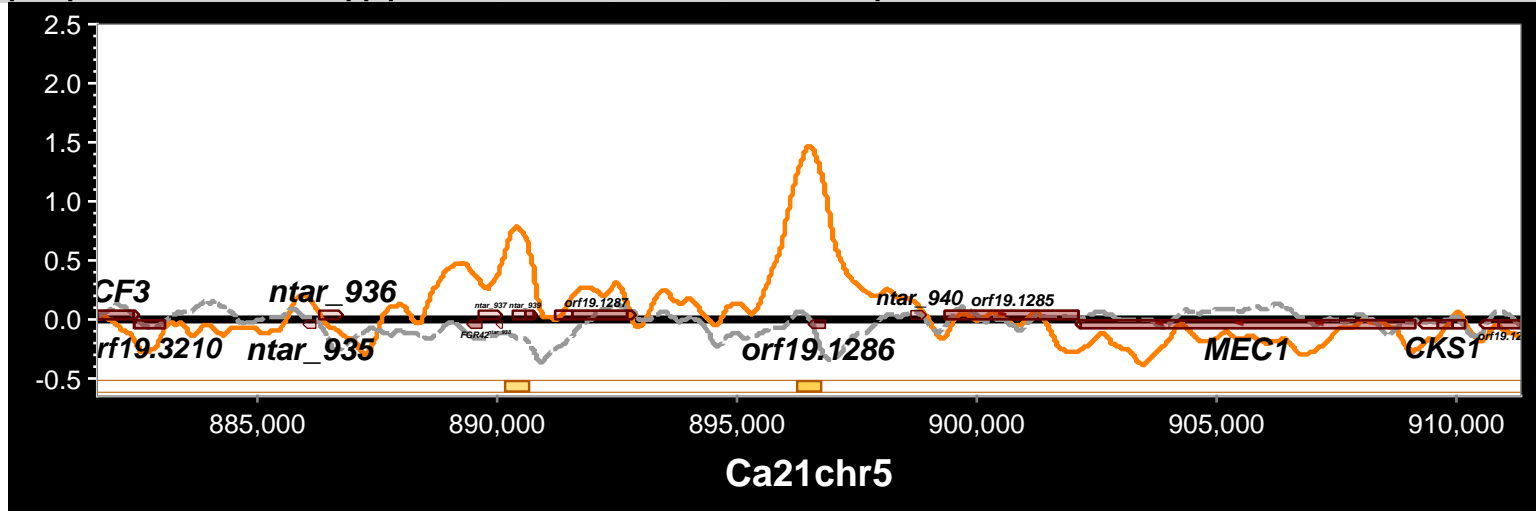

[1.475] Ca21chr1:652633-682316 [+] [ECM33, ARO80, CDC12, orf19.3010, orf19.3009]

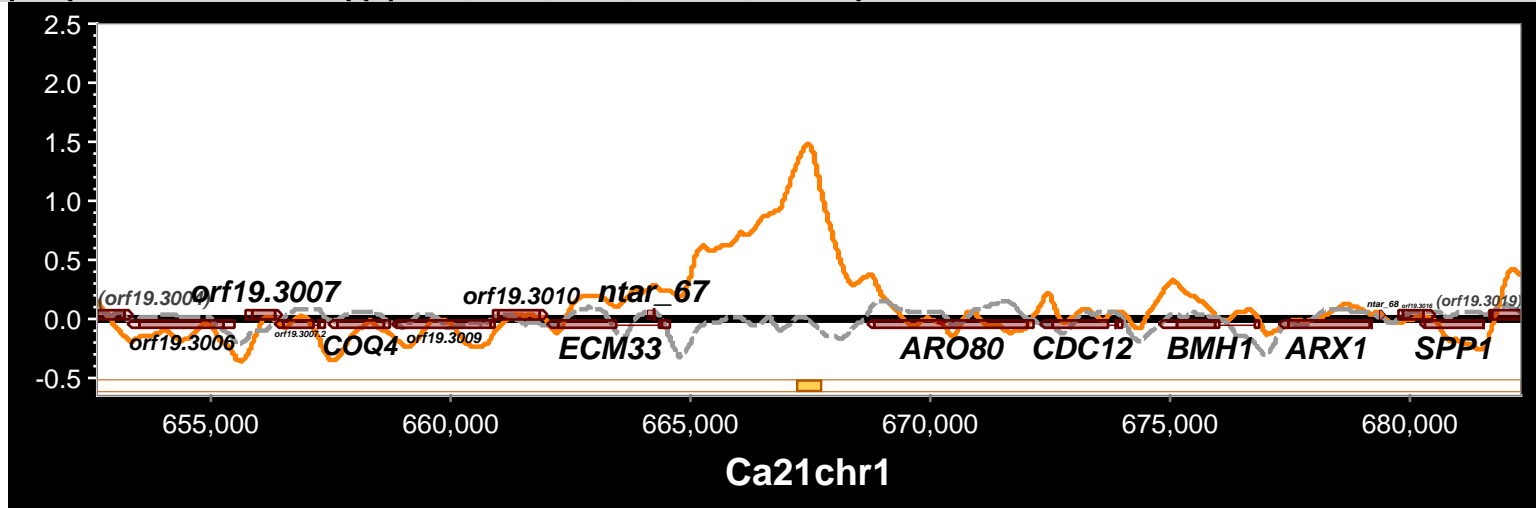

[1.464] Ca21chr7:908253-937936 [+] [orf19.7149, NRG1, TPO2, orf19.7144, orf19.7151]

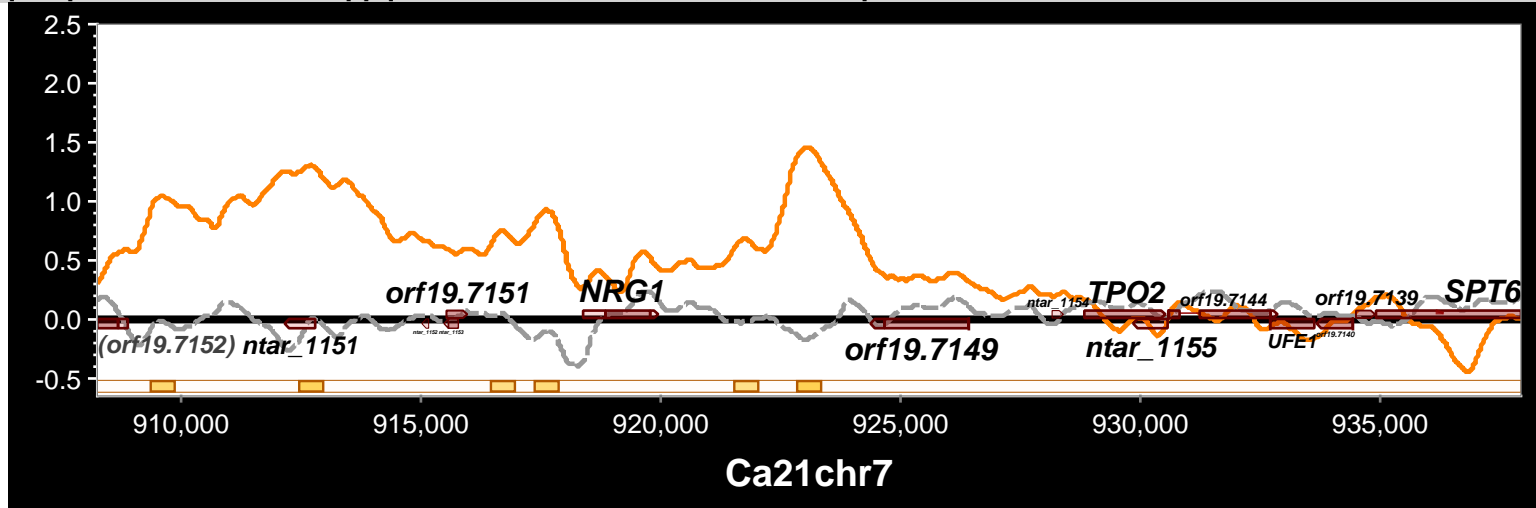

[1.449] Ca21chr1:1071503-1101186 [+] [orf19.450, GAT2, orf19.449, orf19.448, orf19.446.2]

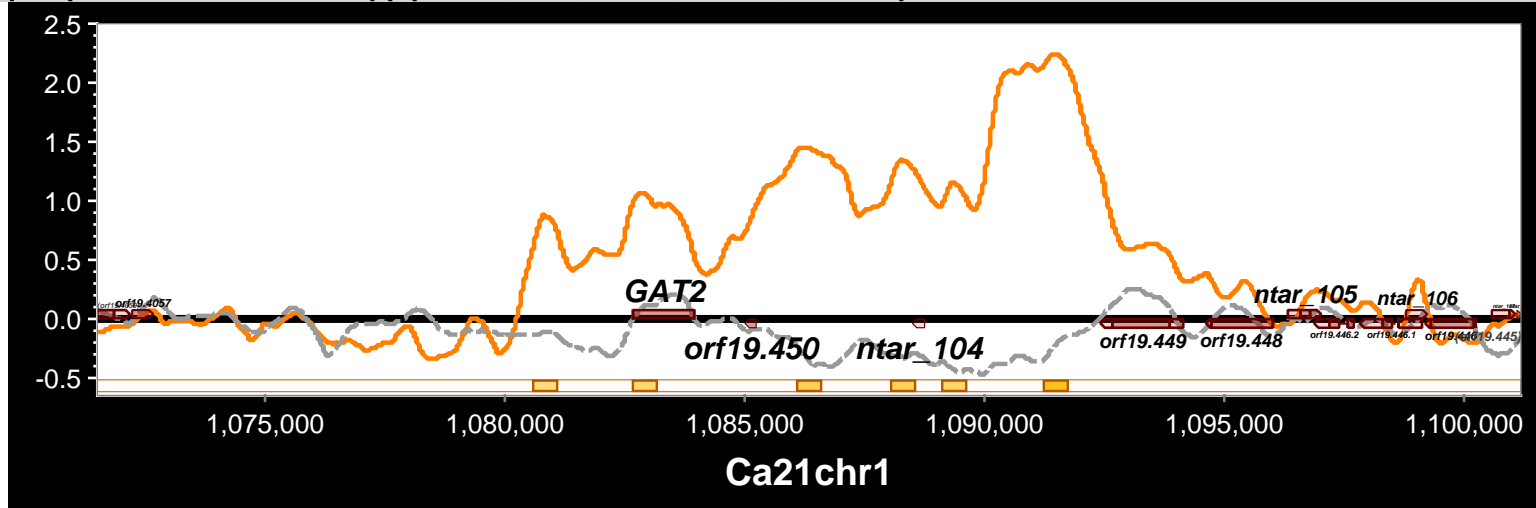

[1.422] Ca21chrR:966898-996581 [+] [RBR1, orf19.533, RBR2, orf19.530, orf19.529.1]

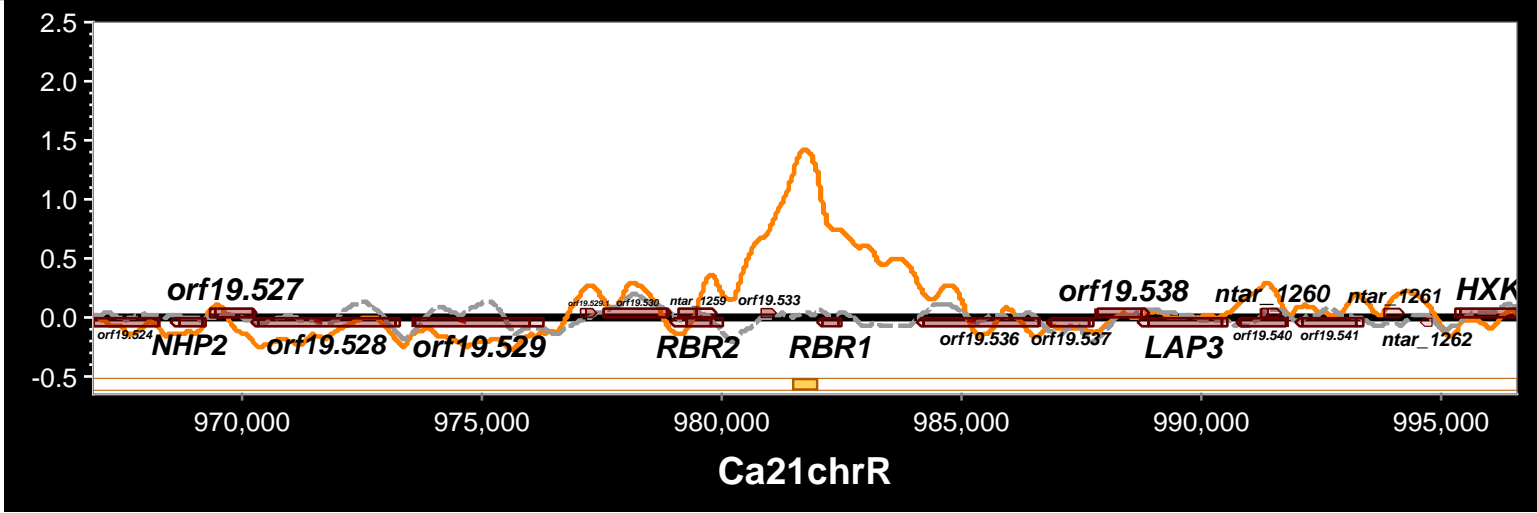

[1.405] Ca21chr5:1032374-1062057 [+] [orf19.3968, PFK1, orf19.3969, CRH12, orf19.3965]

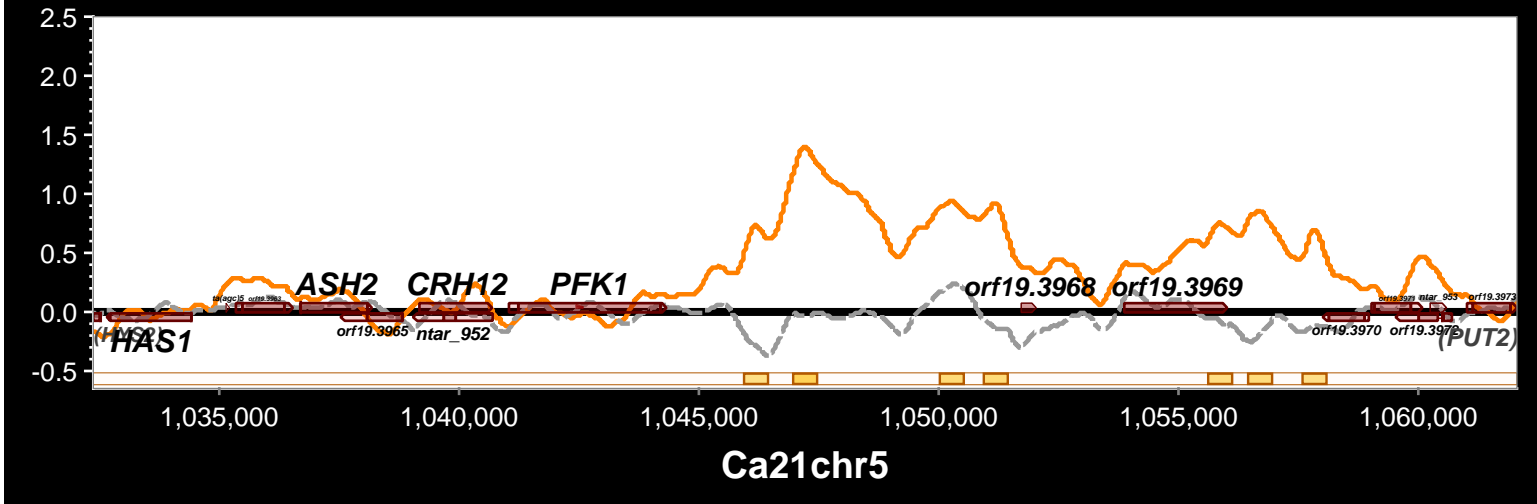

[1.397] Ca21chrR:1510986-1540669 [+] [CRZ2, URA2, ALS3, orf19.1815, SPT10]

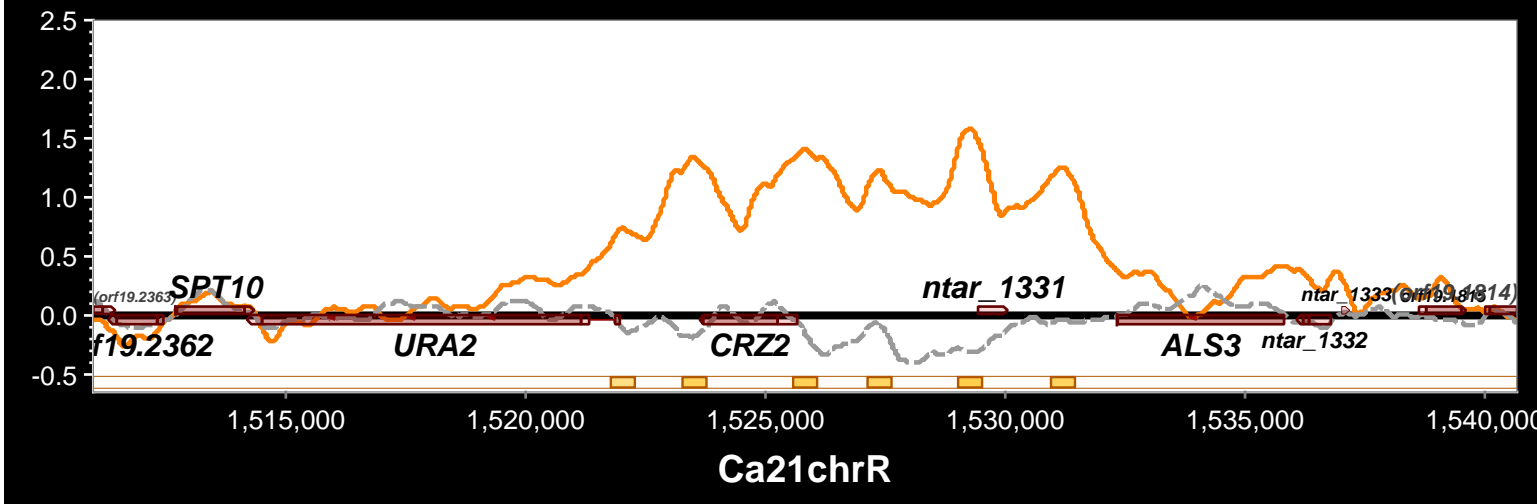

[1.379] Ca21chr2:722528-752211 [+] [ADAEC, orf19.871, orf19.867, orf19.872, orf19.873]

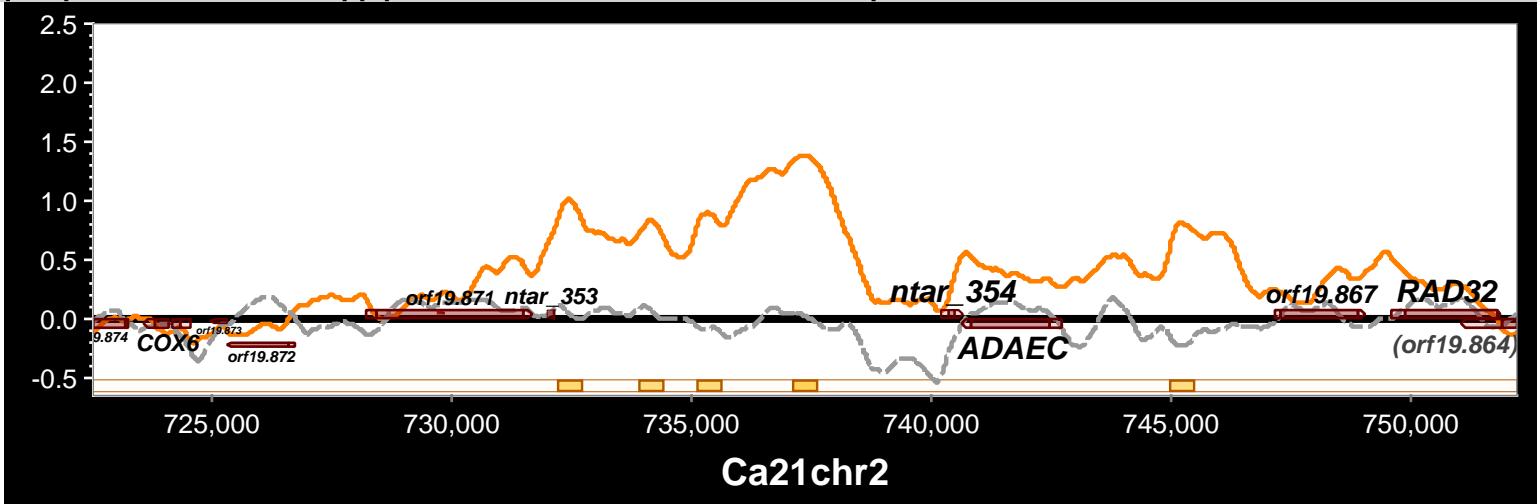

[1.348] Ca21chr1:1073462-1103145 [+] [orf19.450, orf19.449, GAT2, orf19.448, orf19.446.2]

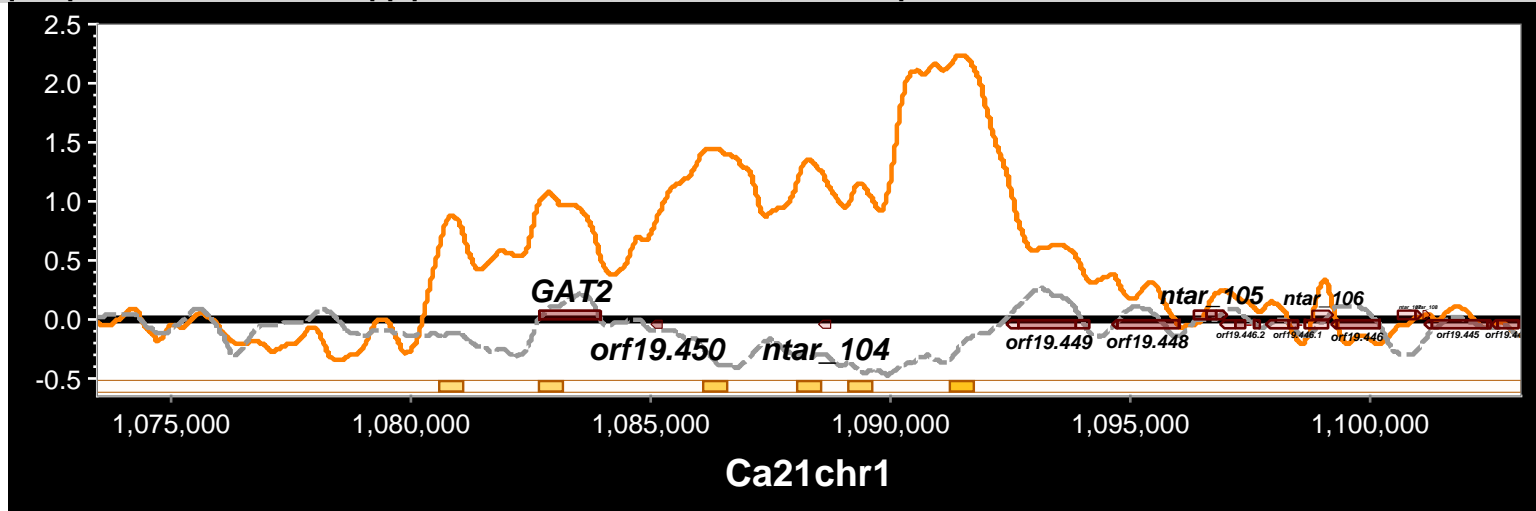

[1.343] Ca21chrR:2096448-2126131 [+] [BET2, DEF1, DPB2, GNP3, YTA6]

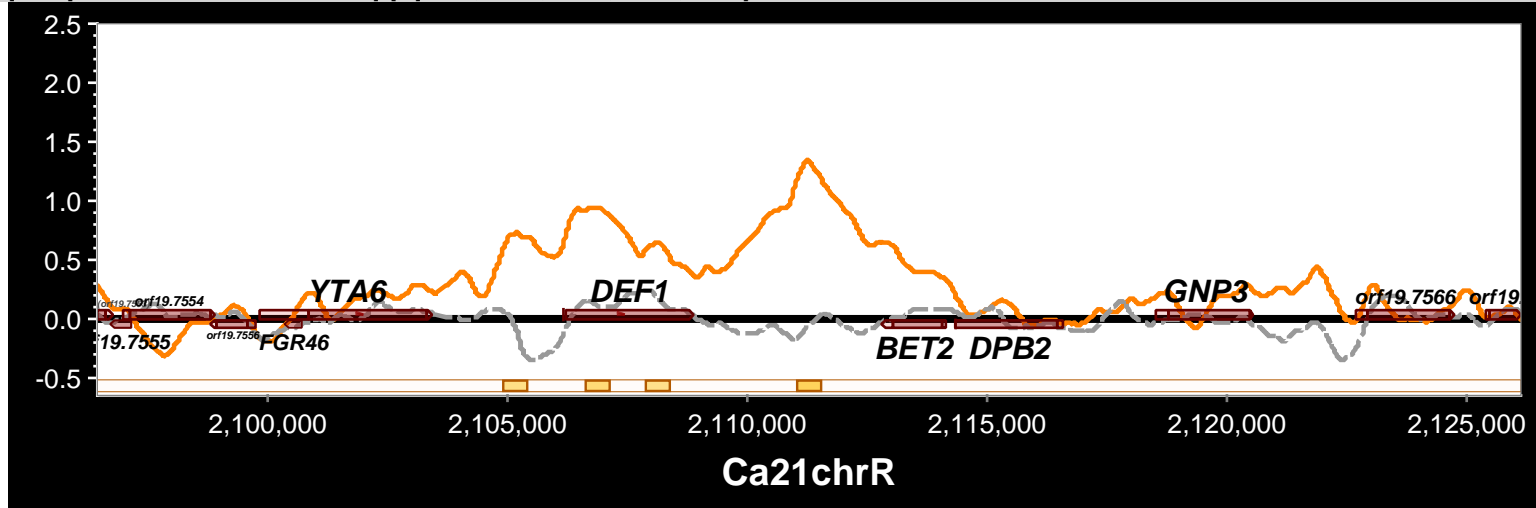

[1.337] Ca21chrR:1296447-1326130 [+] [RPL7, orf19.3868, orf19.3869, RFX1, ADE13]

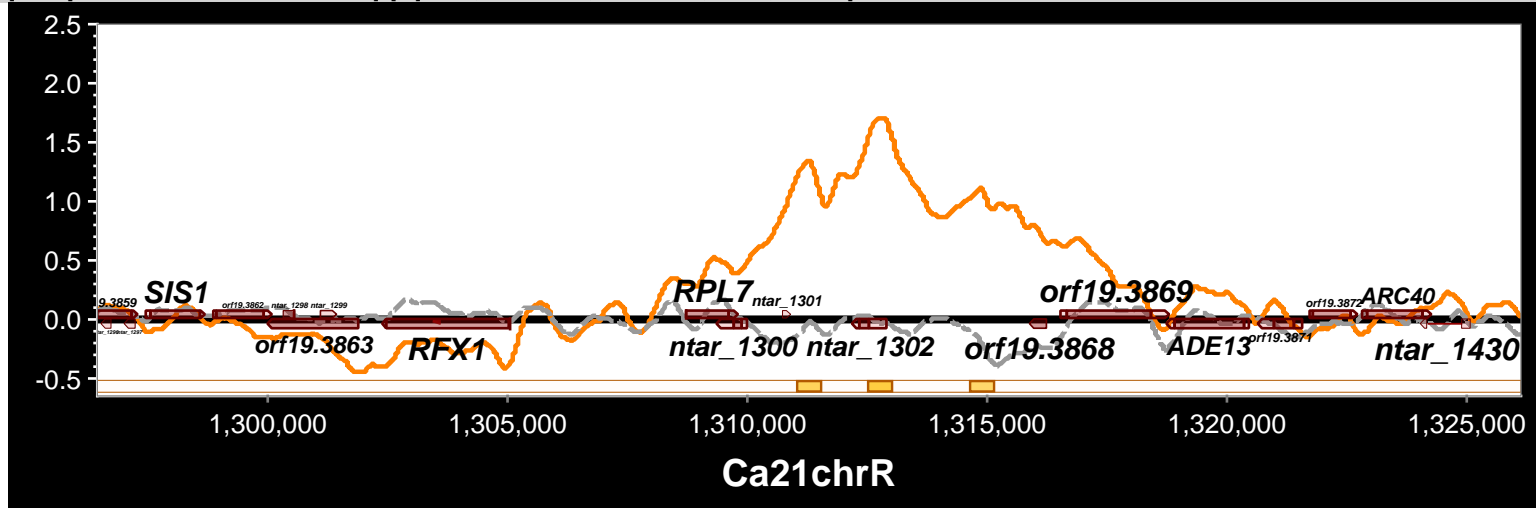

[1.333] Ca21chrR:1508679-1538362 [+] [CRZ2, URA2, SPT10, orf19.2362, ALS3]

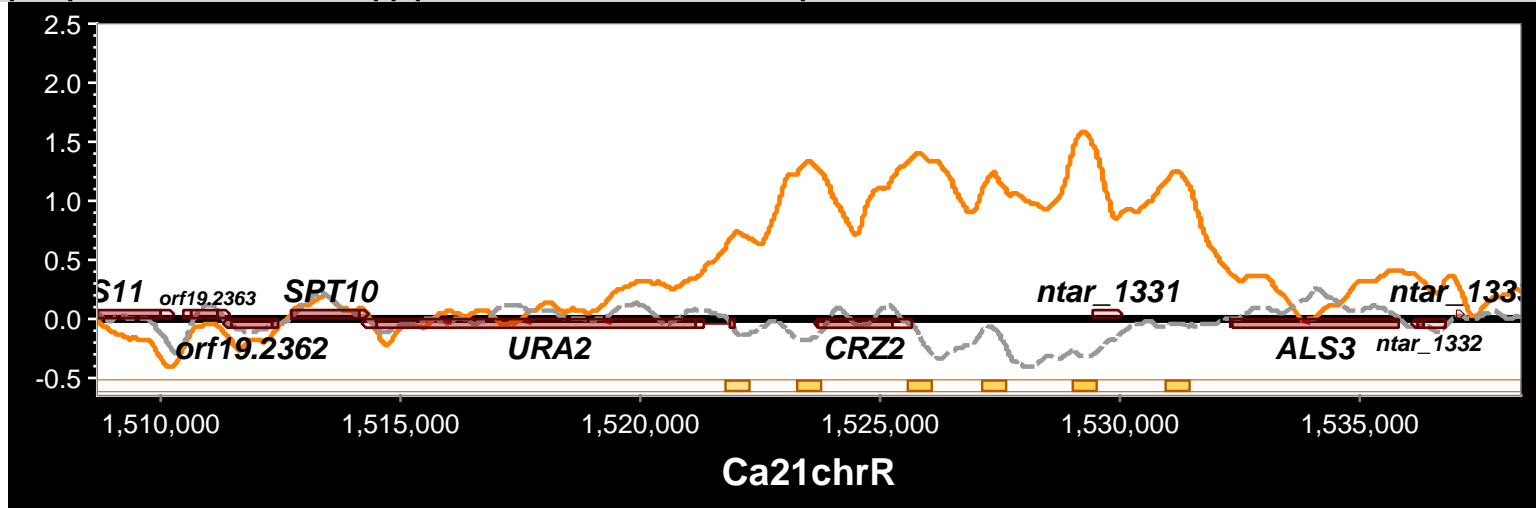

[1.31] Ca21chr3:1098308-1127991 [+] [orf19.5991, WOR2, orf19.5989, orf19.5987, THI4]

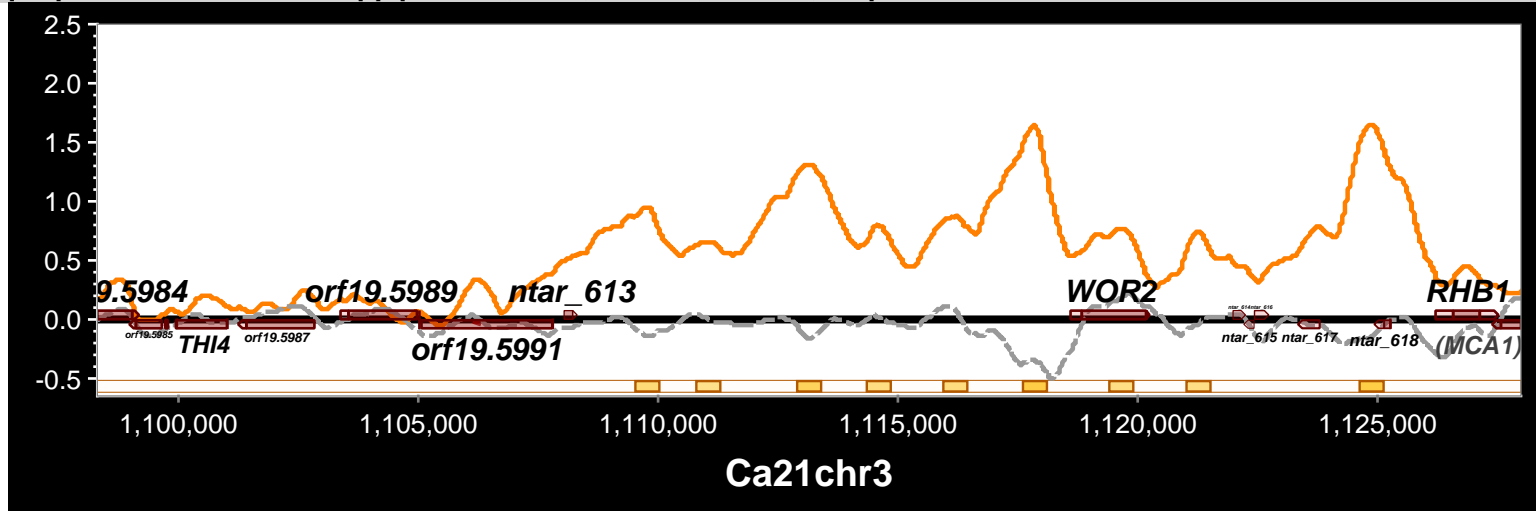

[1.308] Ca21chr2:766265-795948 [+] [orf19.850, orf19.851, orf19.849, SAP98, SAP99]

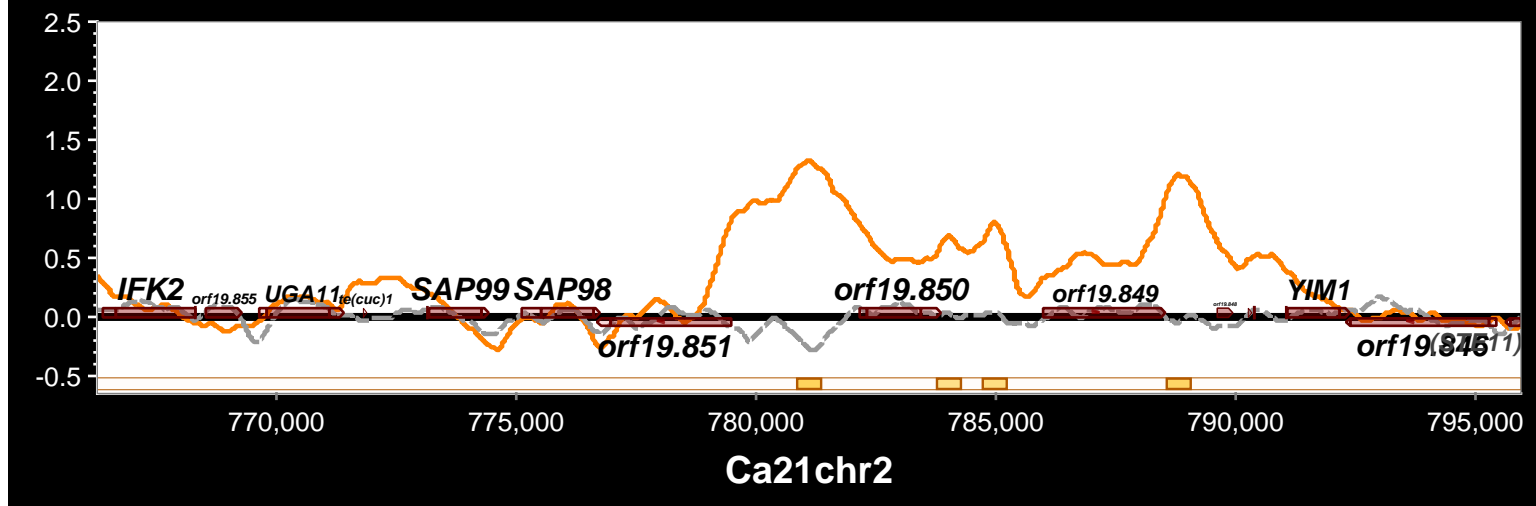

[1.308] Ca21chr7:897871-927554 [+] [orf19.7151, orf19.7152, orf19.7153, NRG1, UTP18]

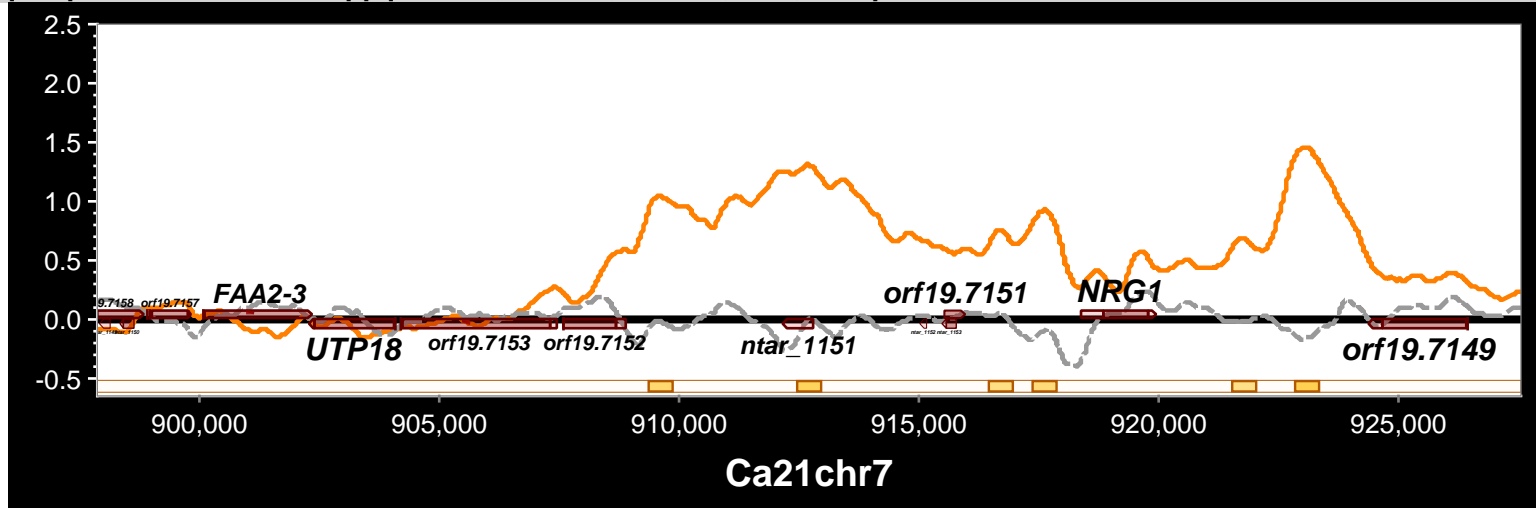

[1.289] Ca21chr7:435621-465304 [+] [CUP9, EXO70, LIG1, GRX1, HSP90]

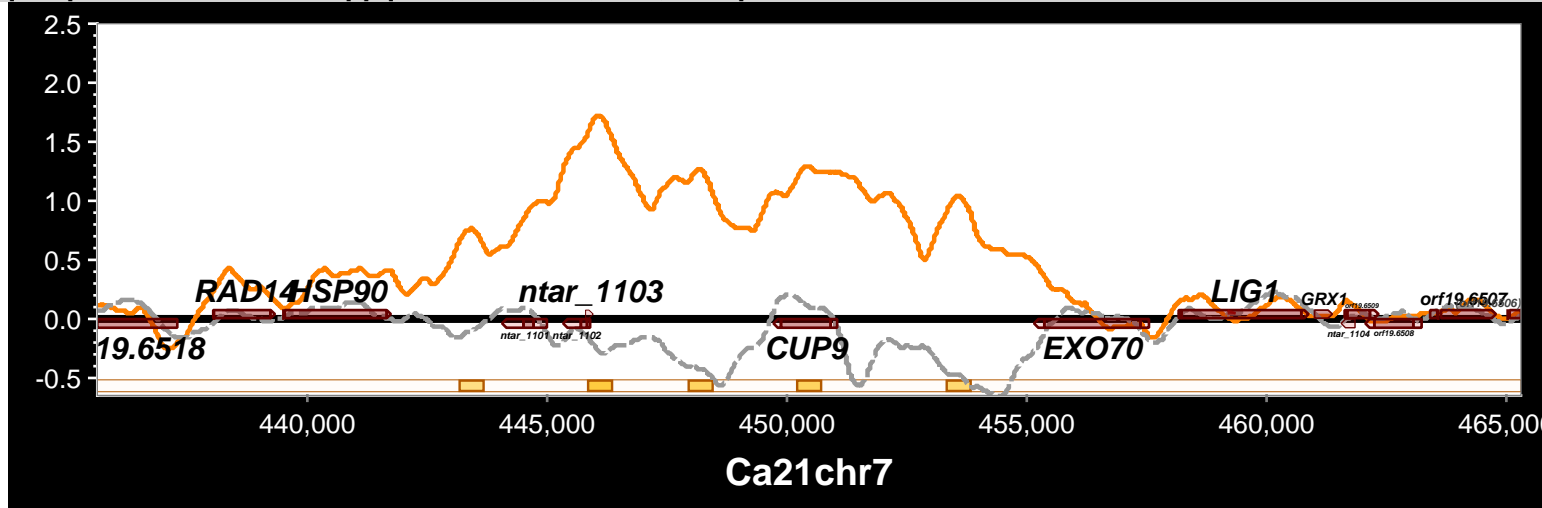

[1.279] Ca21chr5:84821-114504 [+] [orf19.938, NAM7, orf19.936, BUD2, AGA1]

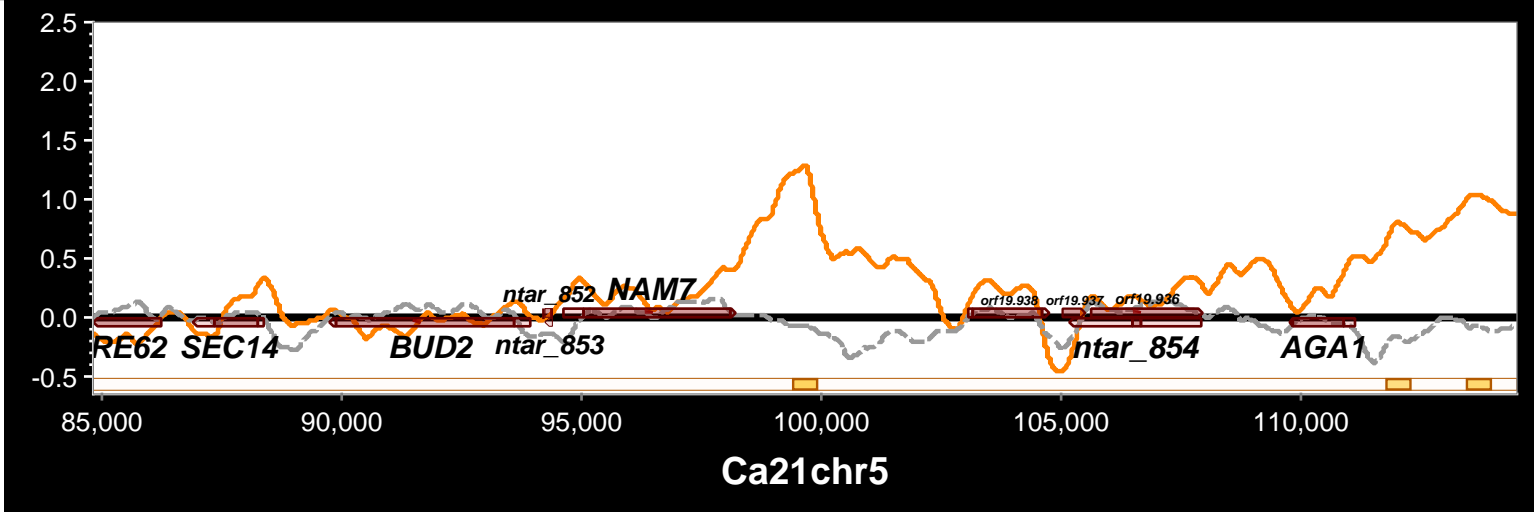

[1.26] Ca21chr7:433359-463042 [+] [CUP9, HSP90, EXO70, LIG1, RAD14]

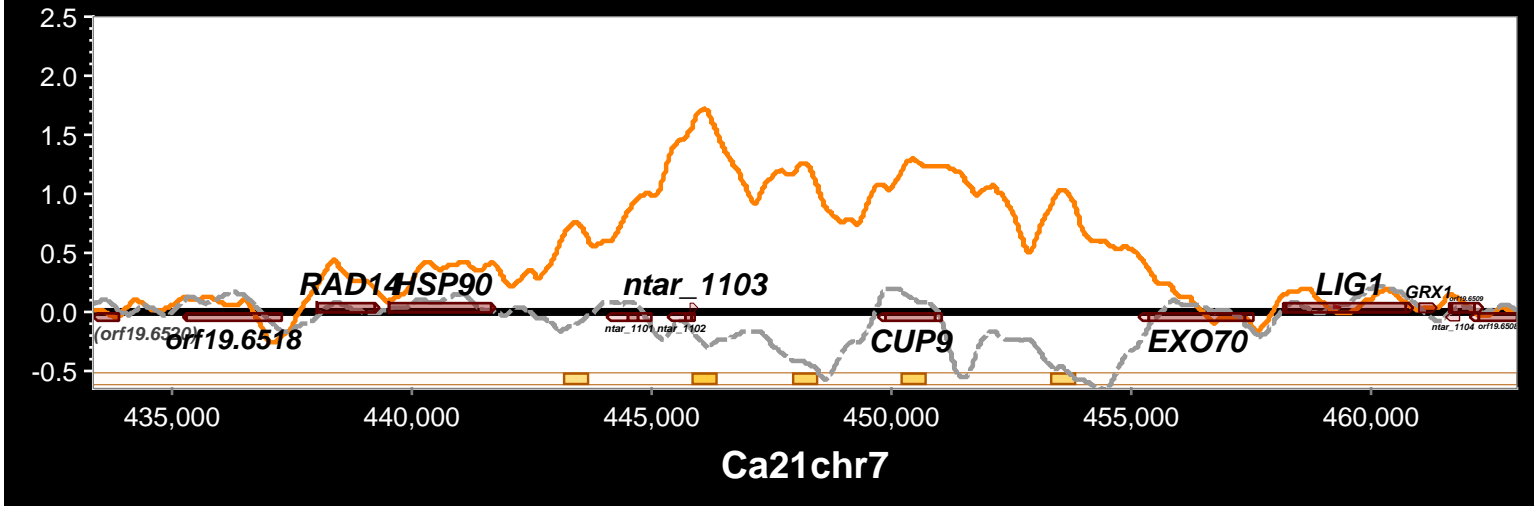

[1.257] Ca21chrR:1516362-1546045 [+] [ALS3, CRZ2, orf19.1815, orf19.1814, URA2]

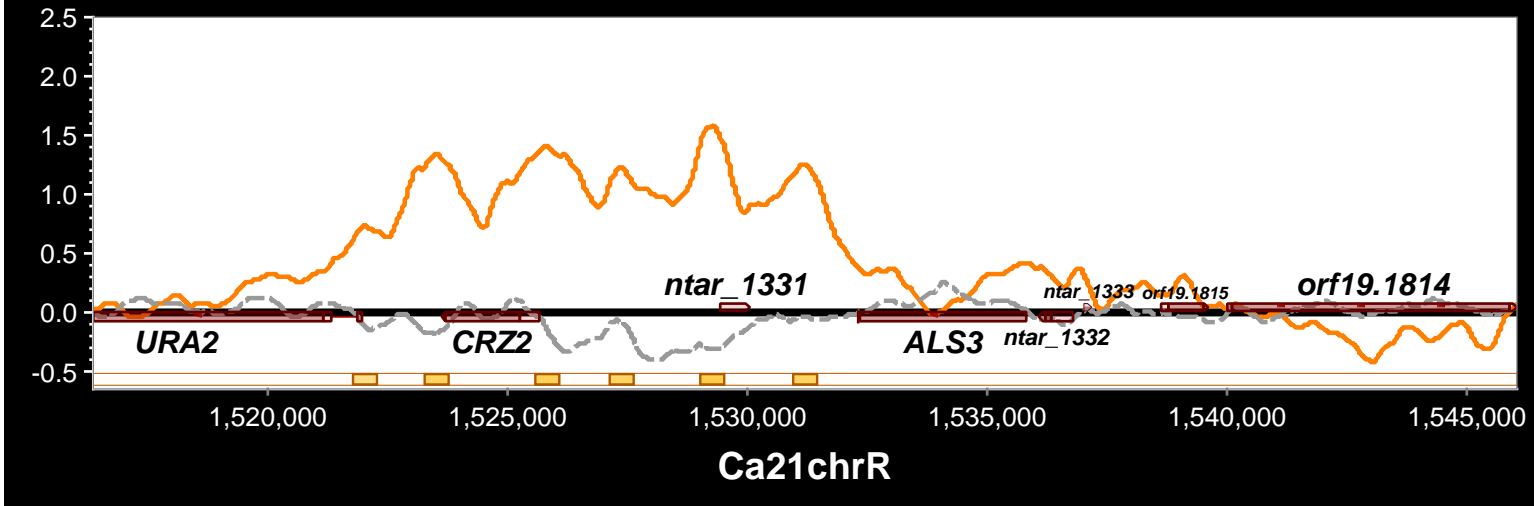

[1.256] Ca21chr5:239778-269461 [+] [orf19.1959, CYC3, CLN3, orf19.1956, orf19.1955]

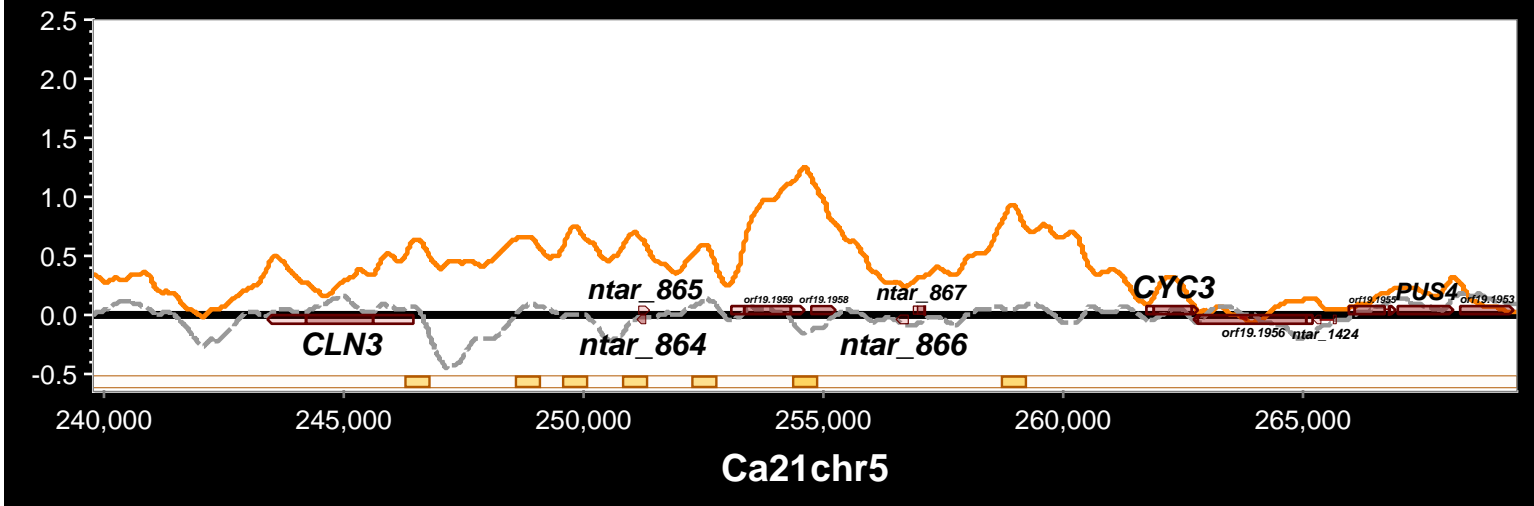

[1.253] Ca21chr7:94745-124428 [+] [orf19.7056, orf19.7054, GAC1, orf19.7057, orf19.7058]

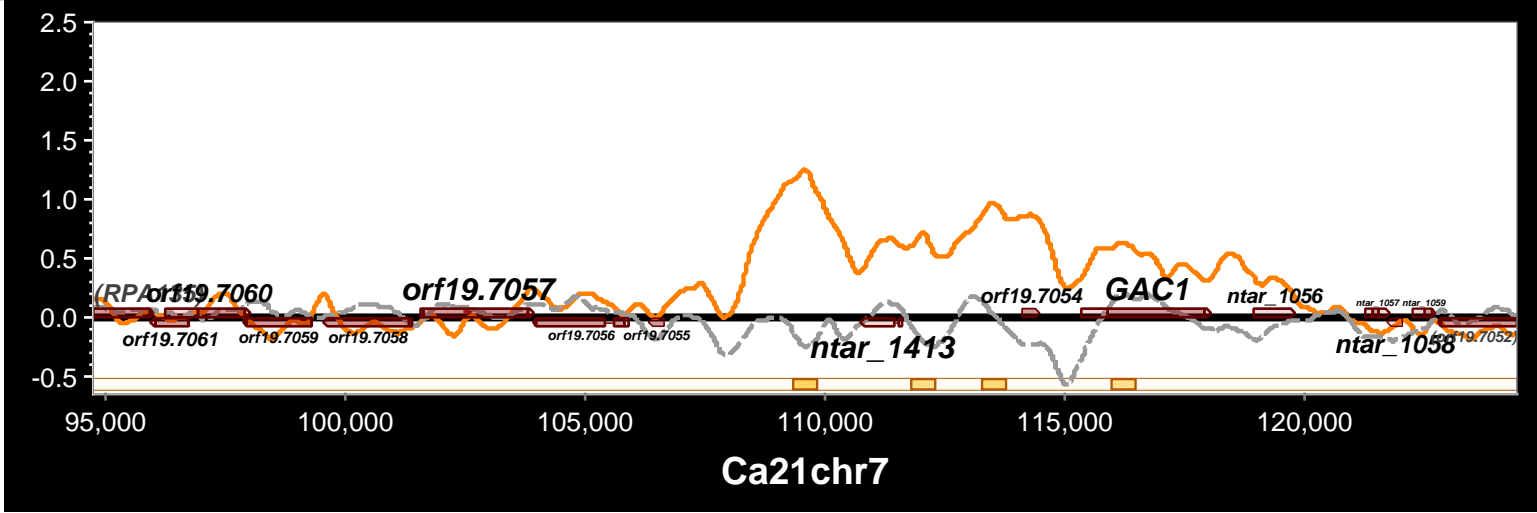

[1.251] Ca21chr5:908920-938603 [+] [orf19.3897, CHT2, orf19.3898, SDC1, orf19.3894]

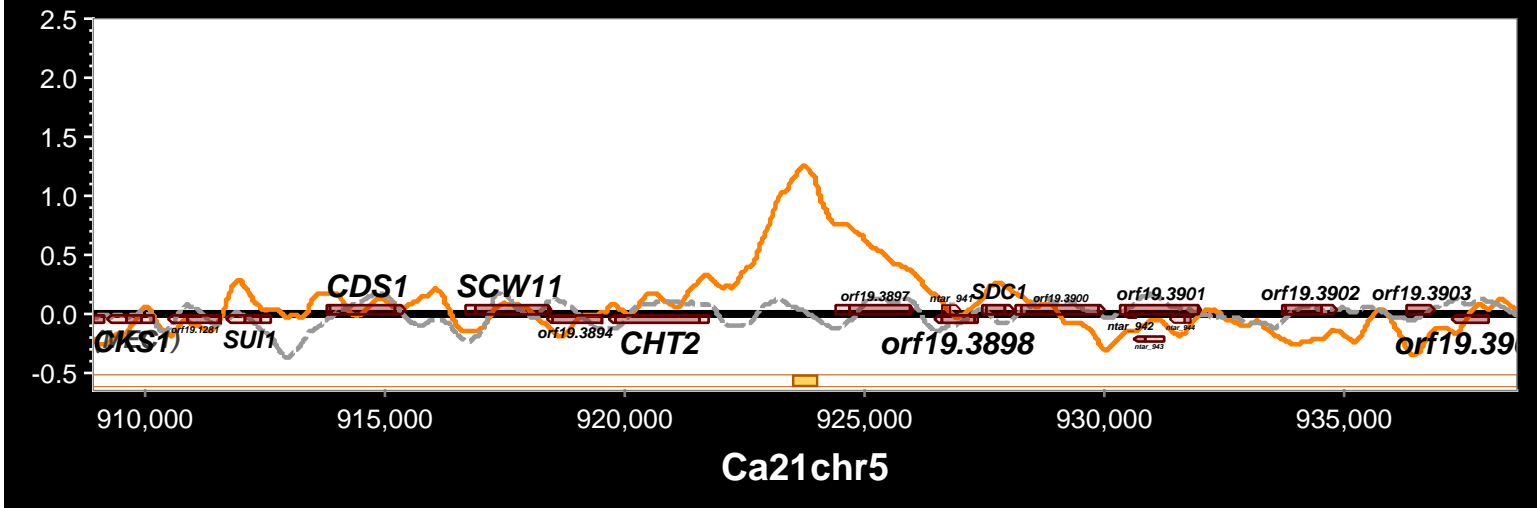

[1.242] Ca21chr3:932026-961709 [+] [ADE2, orf19.5905, RPL19A, TEC1, RAX1]

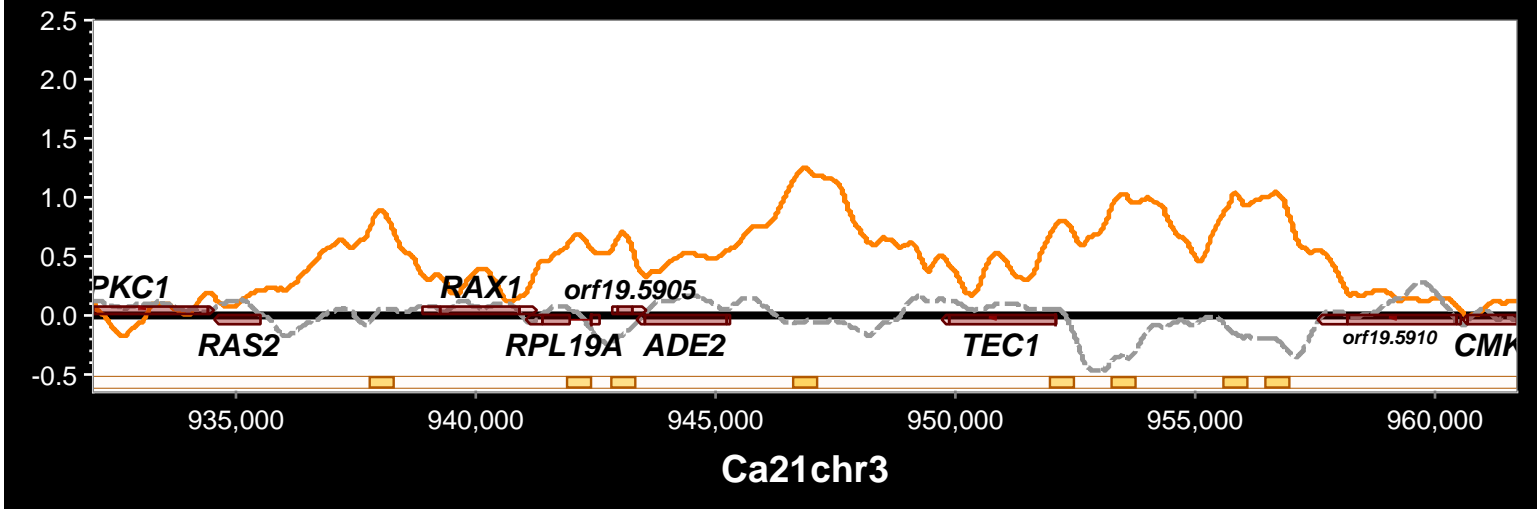

[1.237] Ca21chr5:1101990-1131673 [+] [orf19.4000, orf19.4001, orf19.3999, orf19.3998, DUN1]

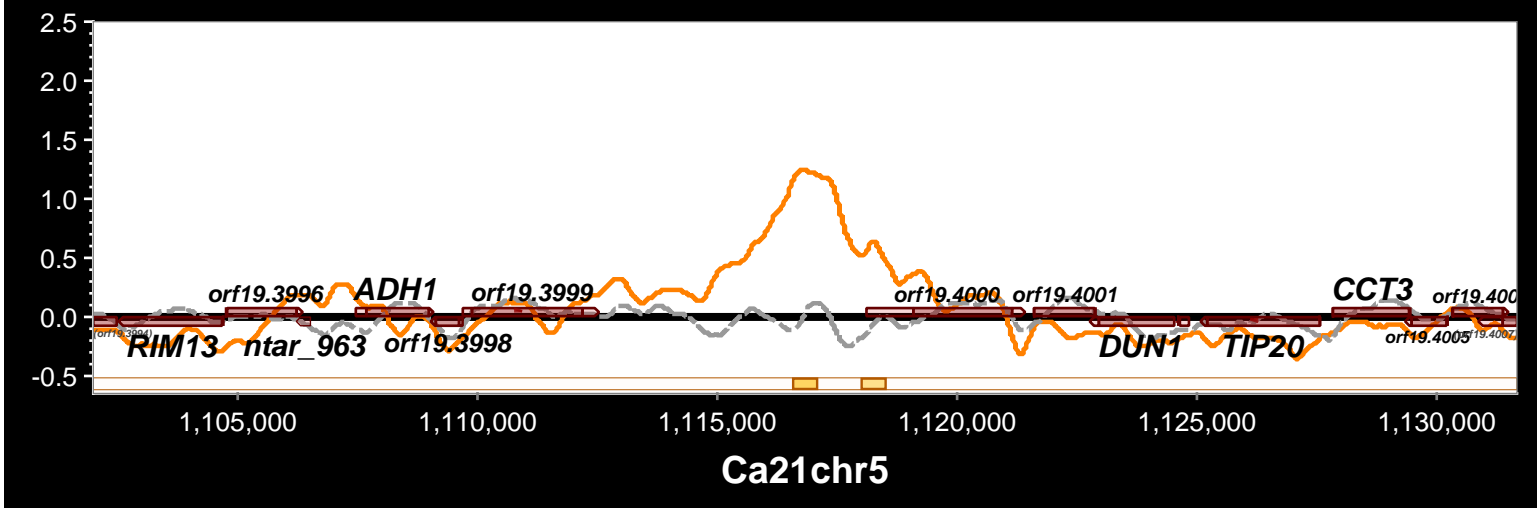

[1.234] Ca21chrR:1512537-1542220 [+] [CRZ2, URA2, ALS3, orf19.1815, orf19.1814]

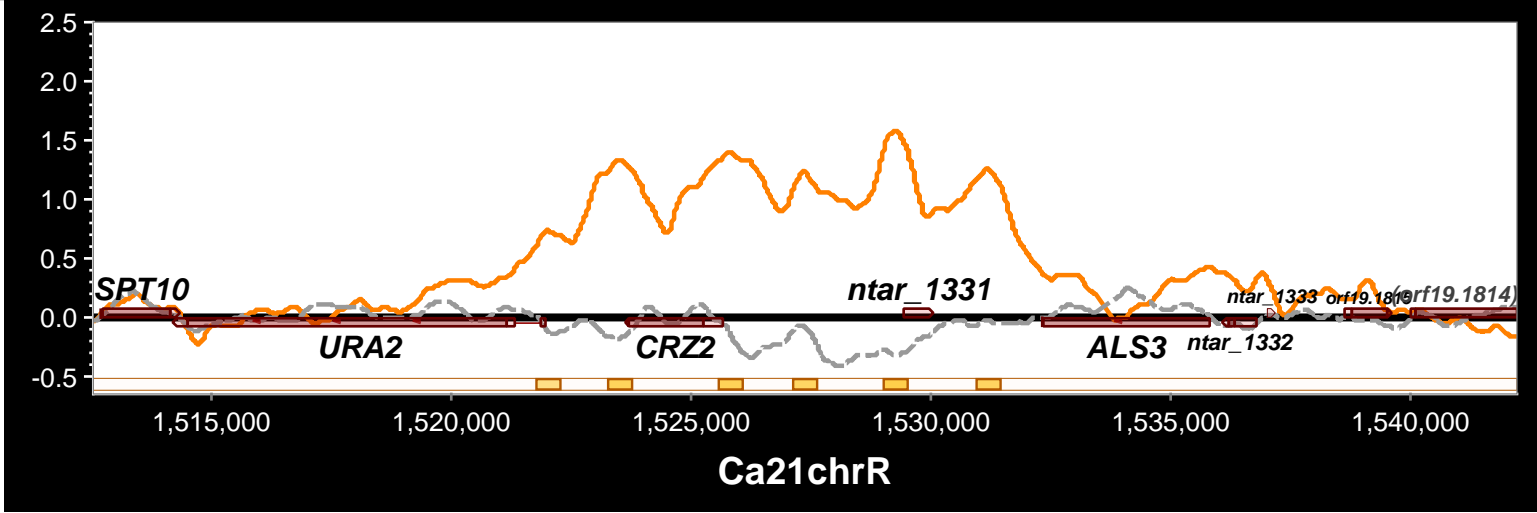

[1.231] Ca21chrR:573362-603045 [+] [orf19.2822, orf19.2821, orf19.2820, orf19.2819, orf19.2818]

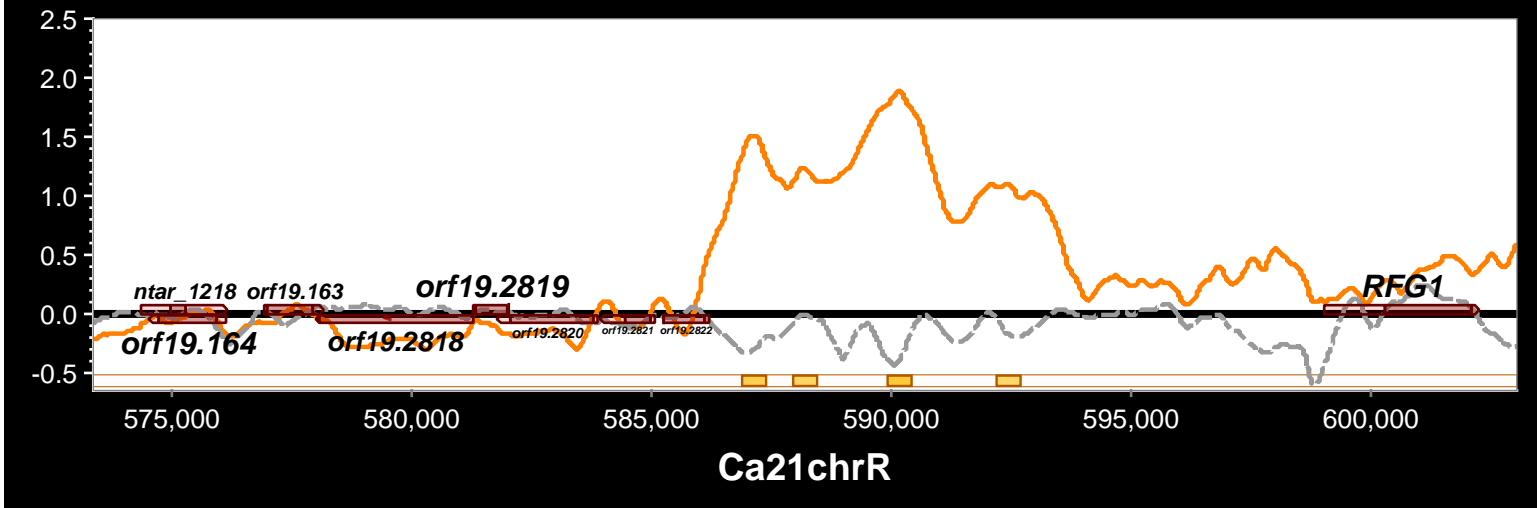

[1.229] Ca21chrR:1-29684 [+] [INO2, orf19.7538, BNR1, orf19.7539.1, tL(CAA)6]

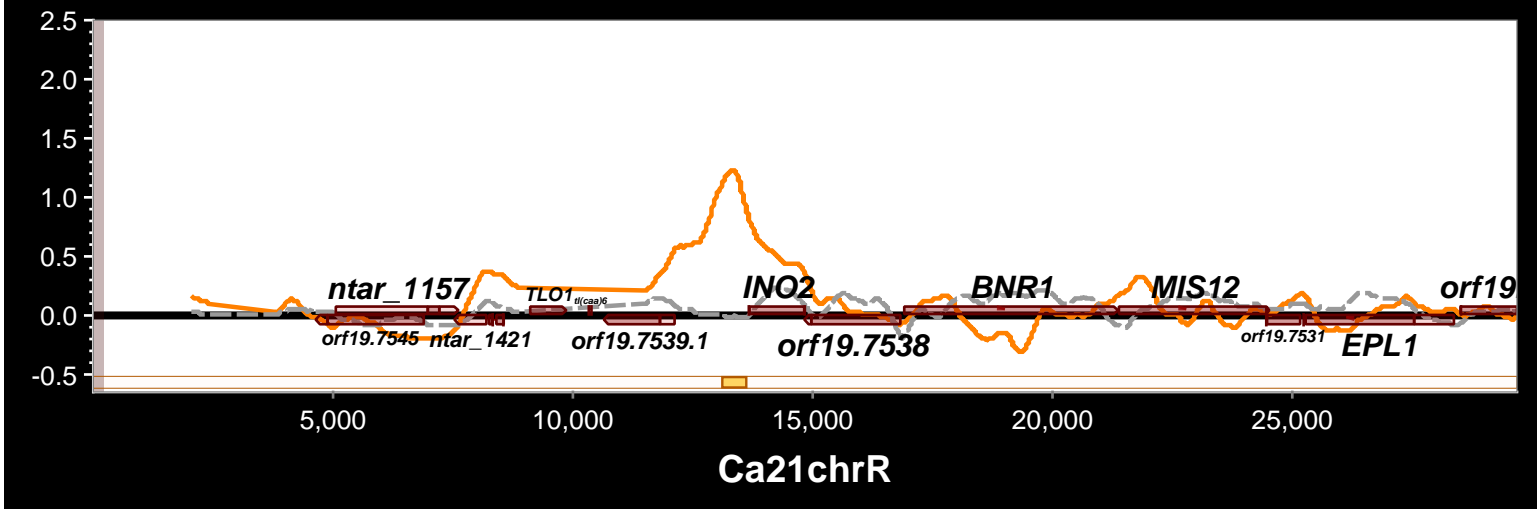

[1.222] Ca21chrR:1251102-1280785 [+] [SFL1, SOK1, orf19.3848, orf19.457, orf19.458]

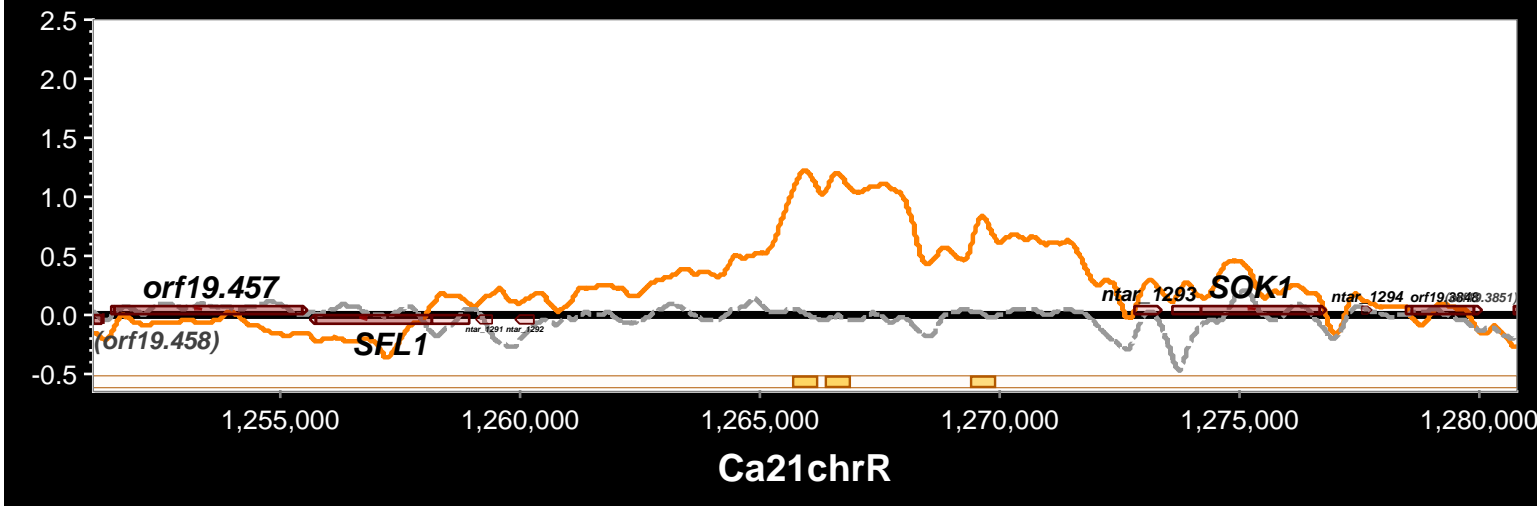

[1.218] Ca21chr3:1628369-1658052 [+] [orf19.6783, BMT1, PGA32, RPS12, orf19.6786]

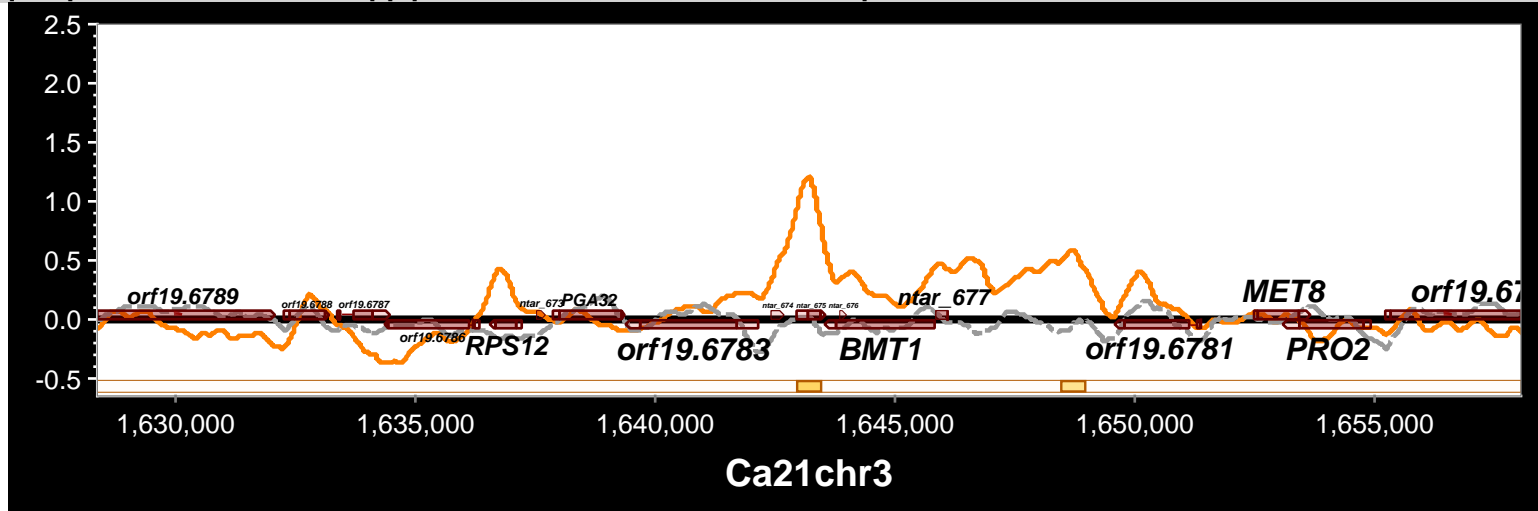

[1.215] Ca21chr1:2669406-2699089 [+] [orf19.5233, RBD1, CSI2, orf19.5231.2, orf19.5231]

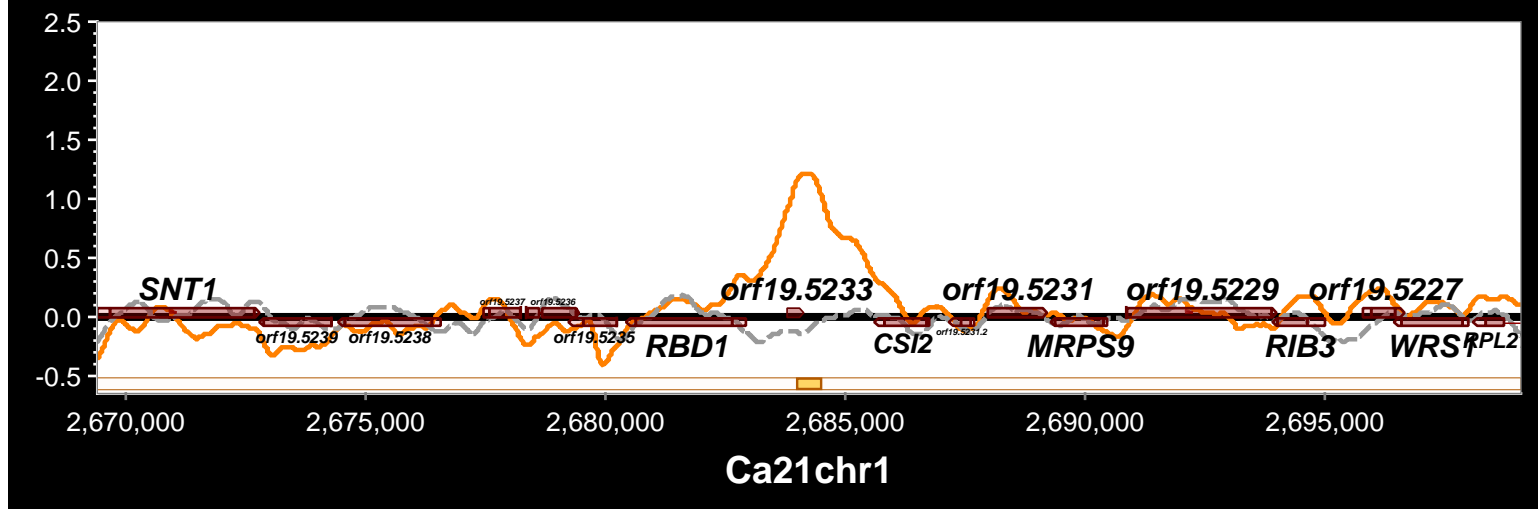

[1.215] Ca21chrR:860418-890101 [+] [orf19.467, HST7, IFF9, orf19.4358, orf19.4357]

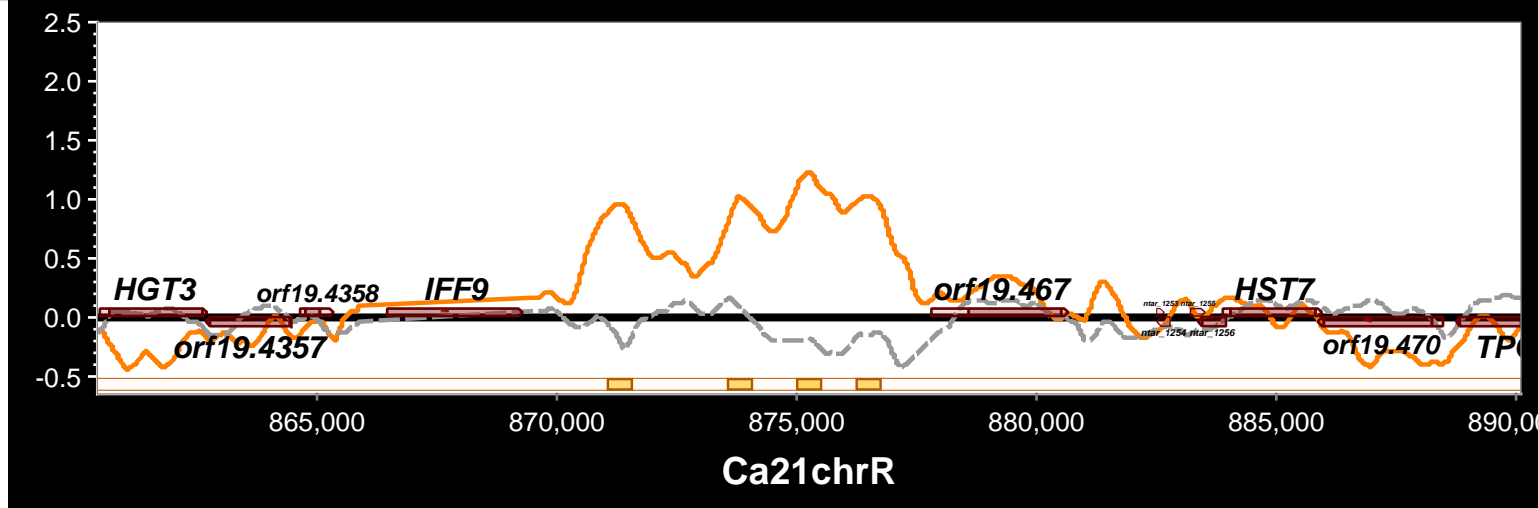

[1.203] Ca21chr2:773971-803654 [+] [tR(UCU)2, tF(GAA)2, YIM1, orf19.849, orf19.846]

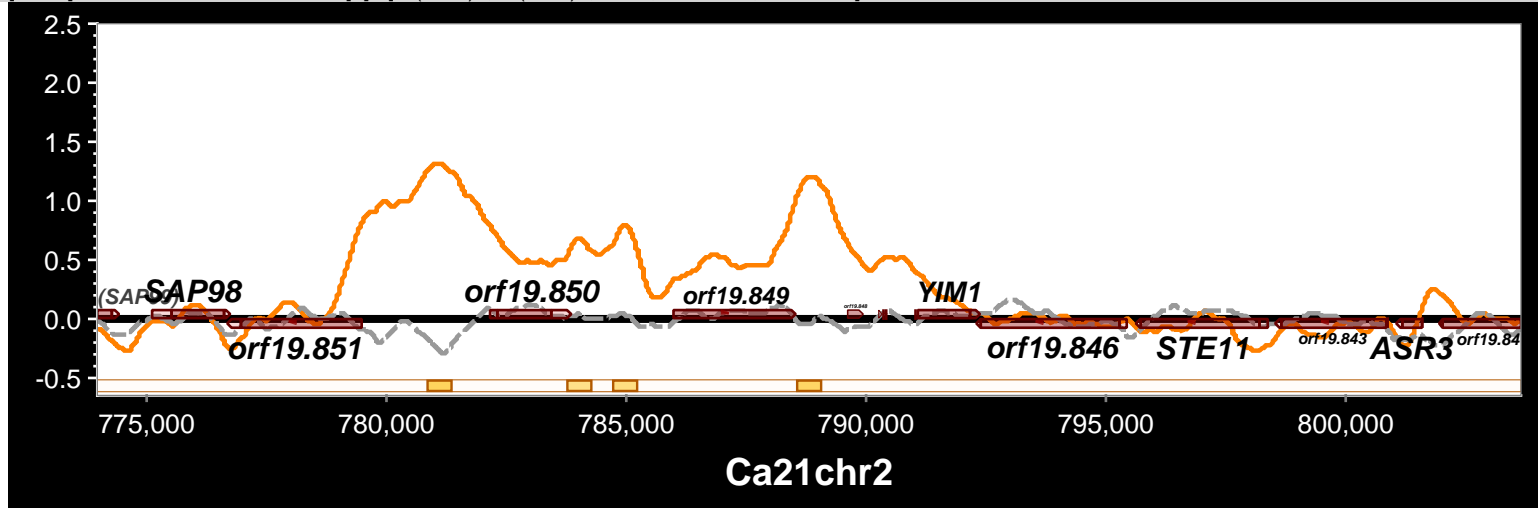



[1.199] Ca21chr5:391782-421465 [+] [FCR3, HIP1, ST11, orf19.3196, PAP1]

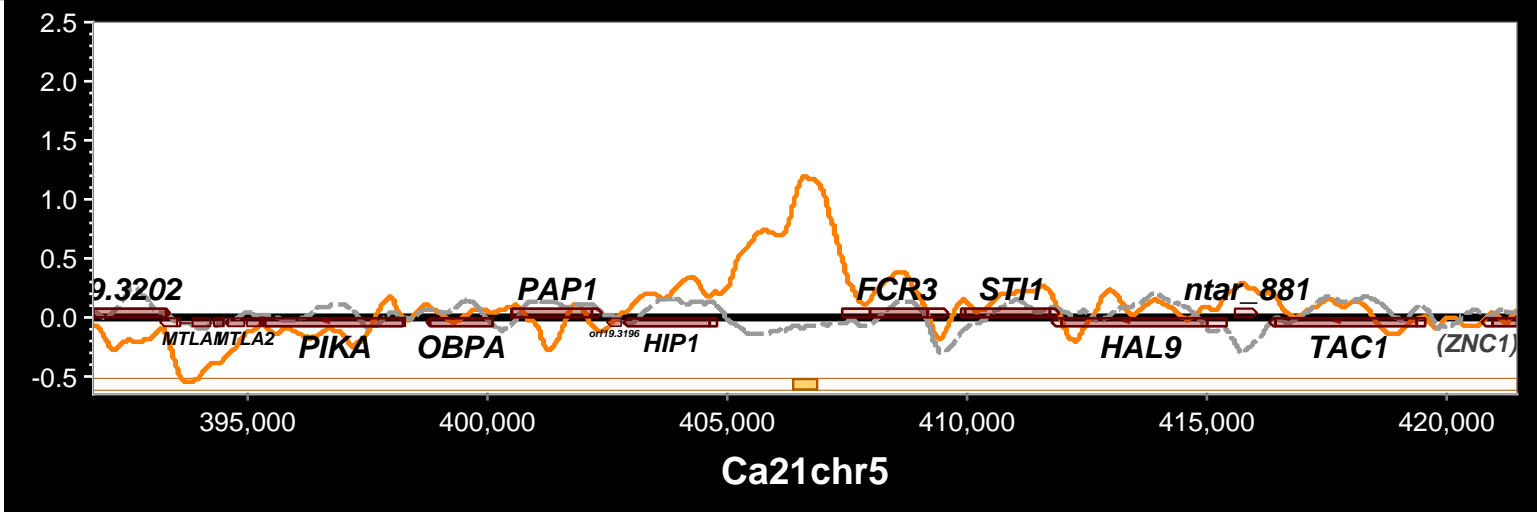

[1.199] Ca21chr6:774361-804044 [+] [ALS1, ALS5, orf19.5735.3, ALS9, CDC50]

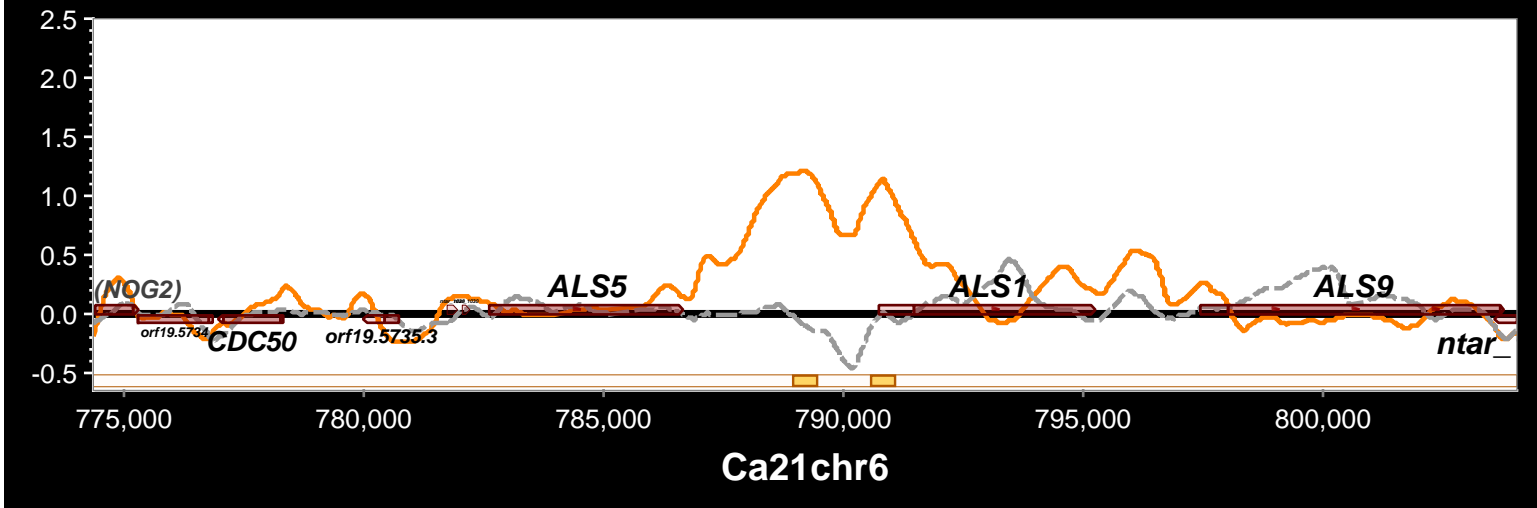

[1.194] Ca21chr2:1132260-1161943 [+] [orf19.6874, ts(AGA)4, orf19.6873.1, RPS8A, VPS35]

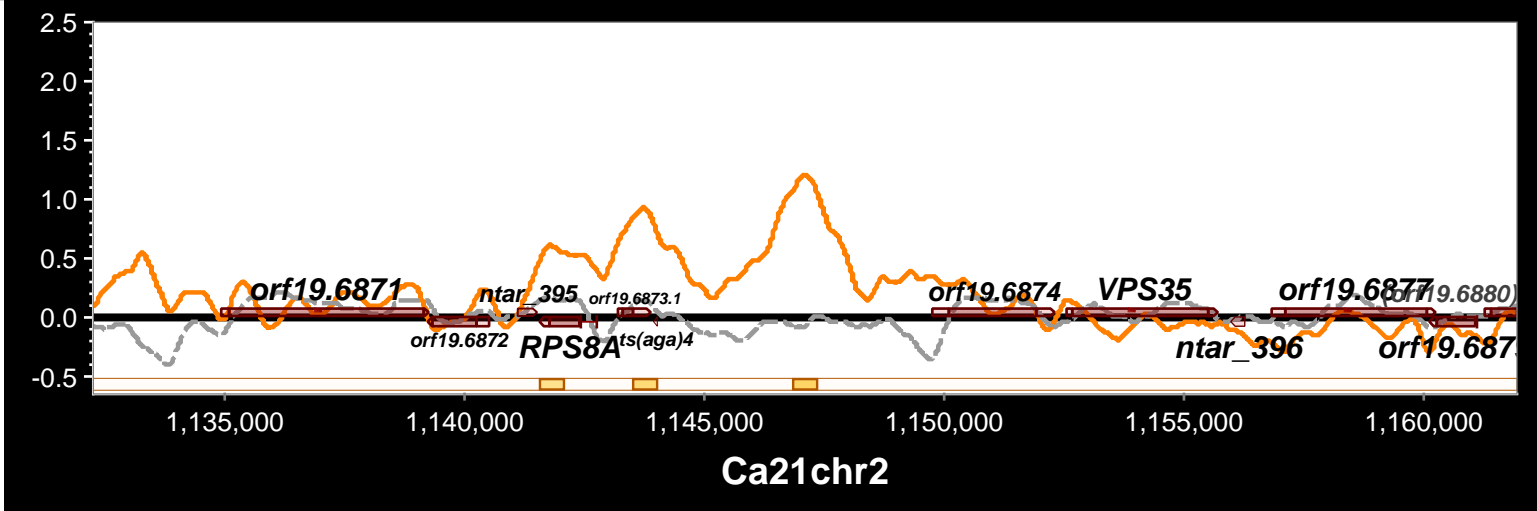

[1.19] Ca21chrR:1251784-1281467 [+] [SOK1, SFL1, orf19.3848, orf19.3851, orf19.457]

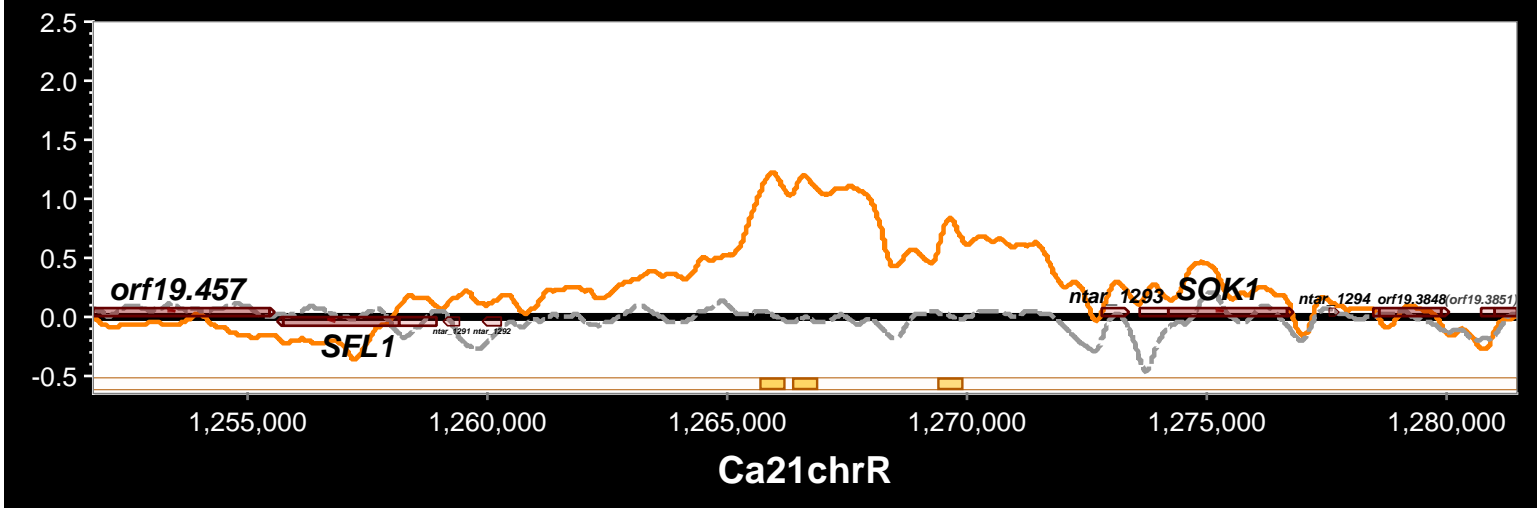

[1.156] Ca21chr1:1074528-1104211 [+] [orf19.450, orf19.449, orf19.448, GAT2, orf19.446.2]

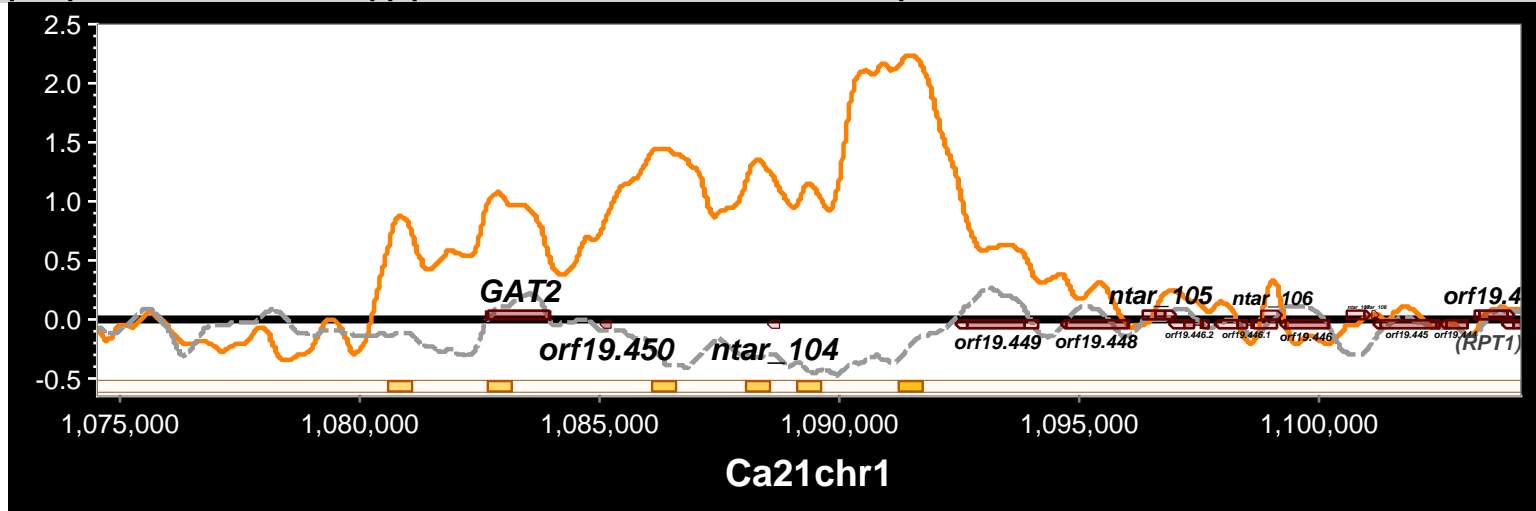

[1.156] Ca21chr1:1484936-1514619 [+] [RBT4, orf19.6203, orf19.6200, orf19.6205, orf19.6199]

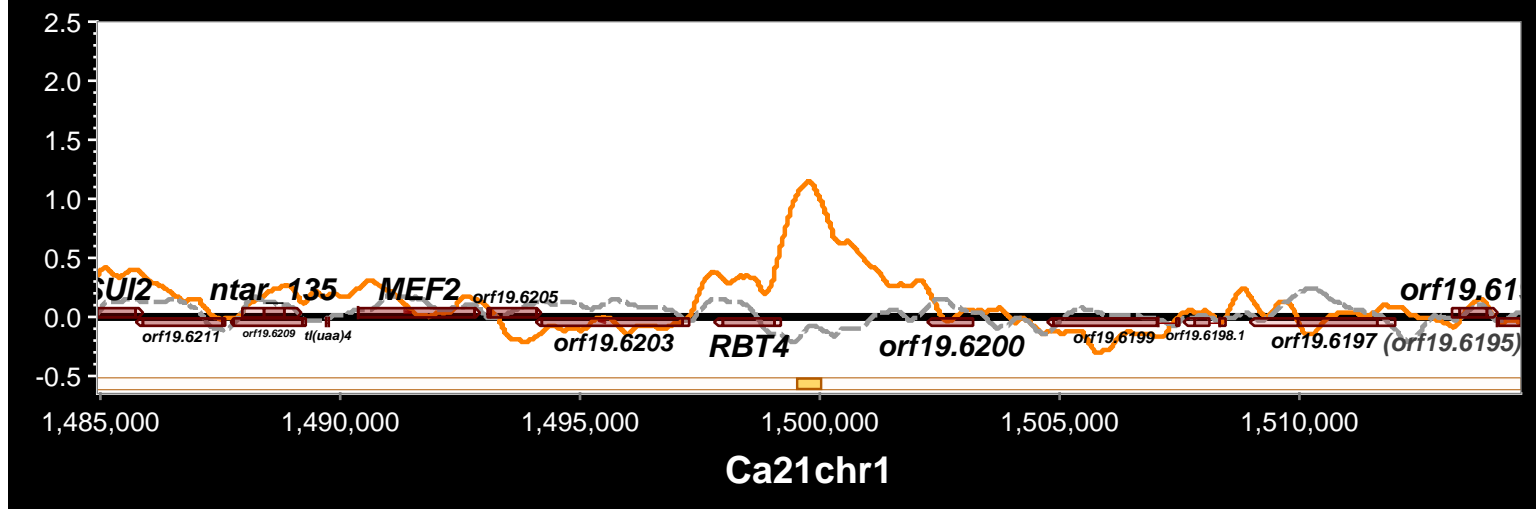

[1.135] Ca21chr6:775986-805669 [+] [ALS1, ALS9, ALS5, orf19.5735.3, CDC50]

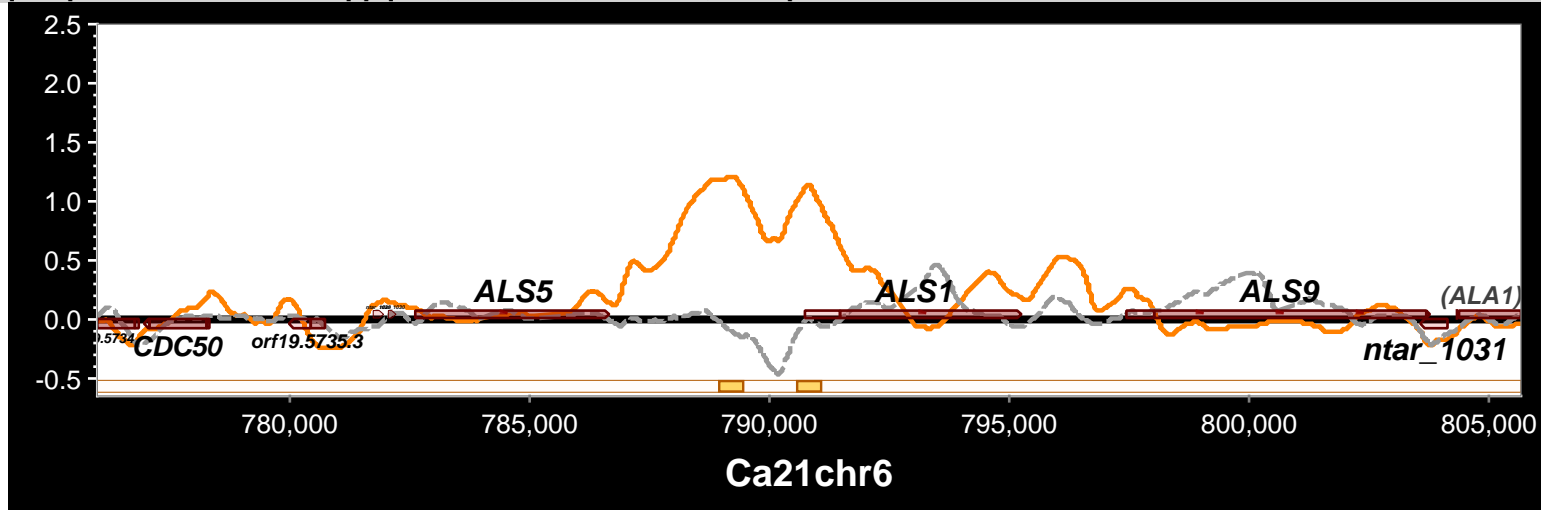

[1.124] Ca21chr3:989136-1018819 [+] [orf19.5934, orf19.5933, orf19.5935, orf19.5932, orf19.5931]

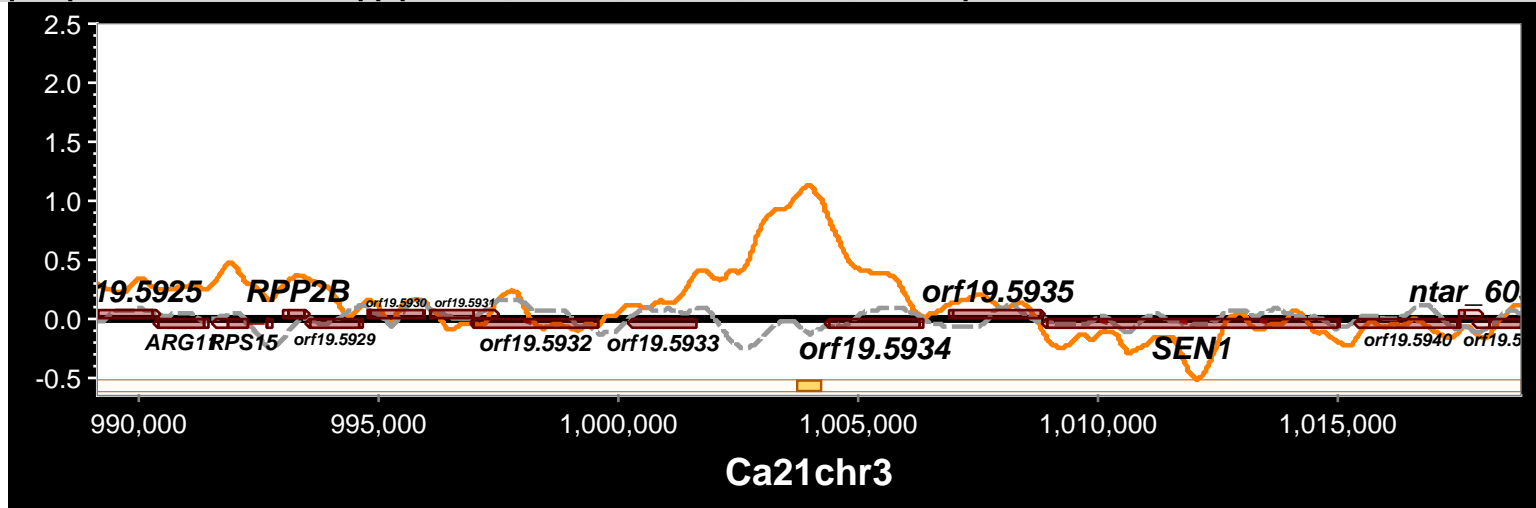

[1.109] Ca21chrR:1300053-1329736 [+] [orf19.3868, orf19.3869, ADE13, RPL7, orf19.3871]

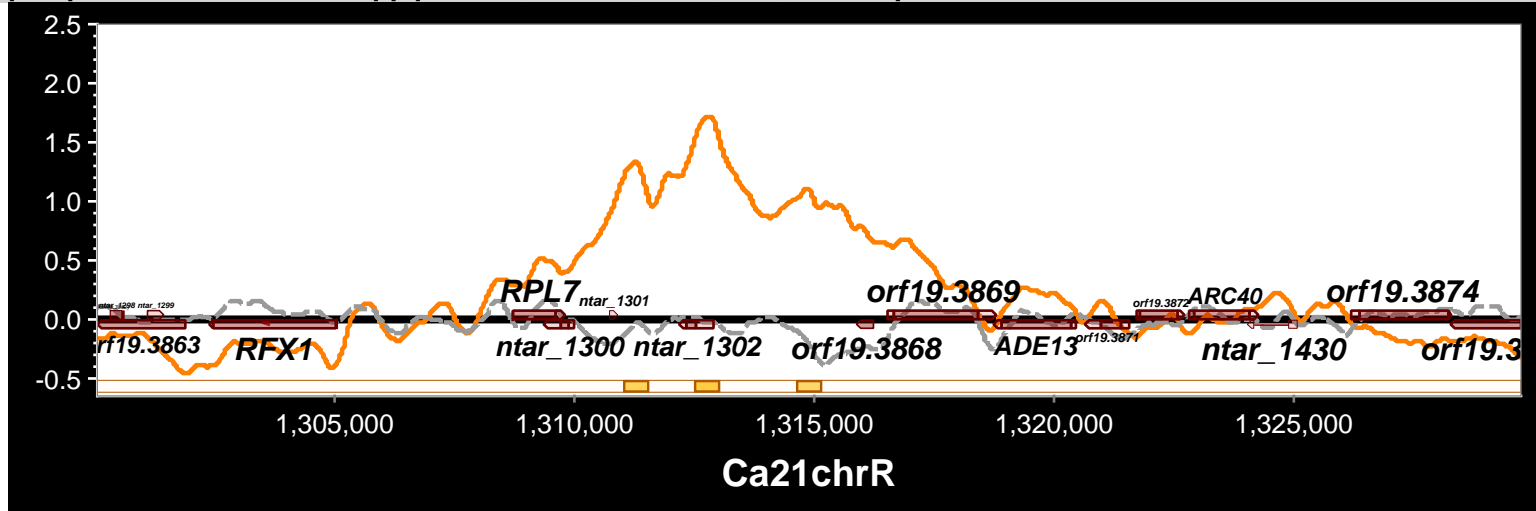

[1.106] Ca21chrR:577604-607287 [+] [orf19.2822, orf19.2821, RFG1, orf19.2820, orf19.2819]

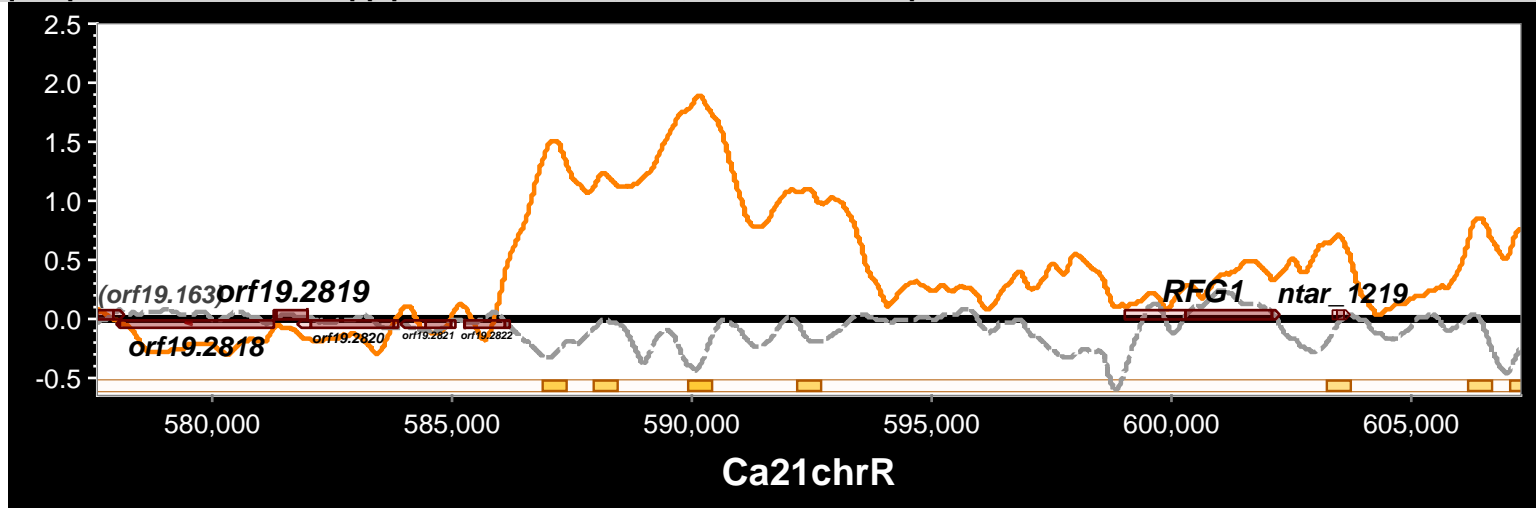

[1.104] Ca21chr3:1455998-1485681 [+] [th(GUG)3, GLG2, AAF1, orf19.7433, APN1]

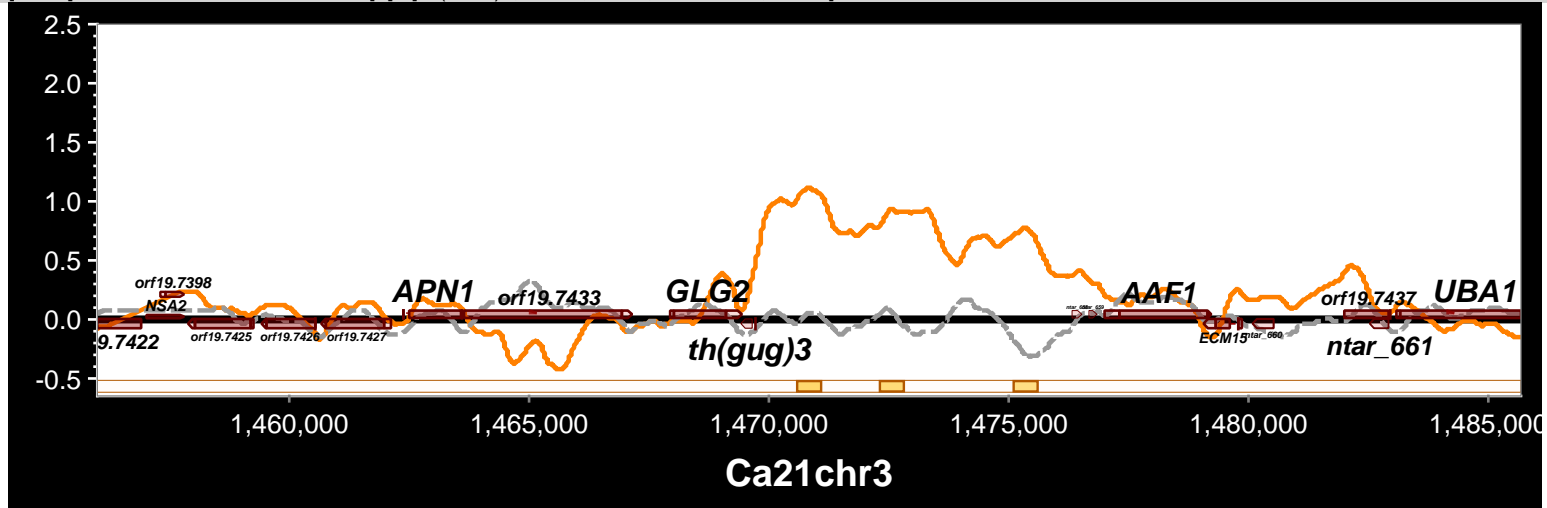

[1.102] Ca21chr2:95777-125460 [+] [orf19.2061, SOD4, SOD5, orf19.2059, orf19.2063]

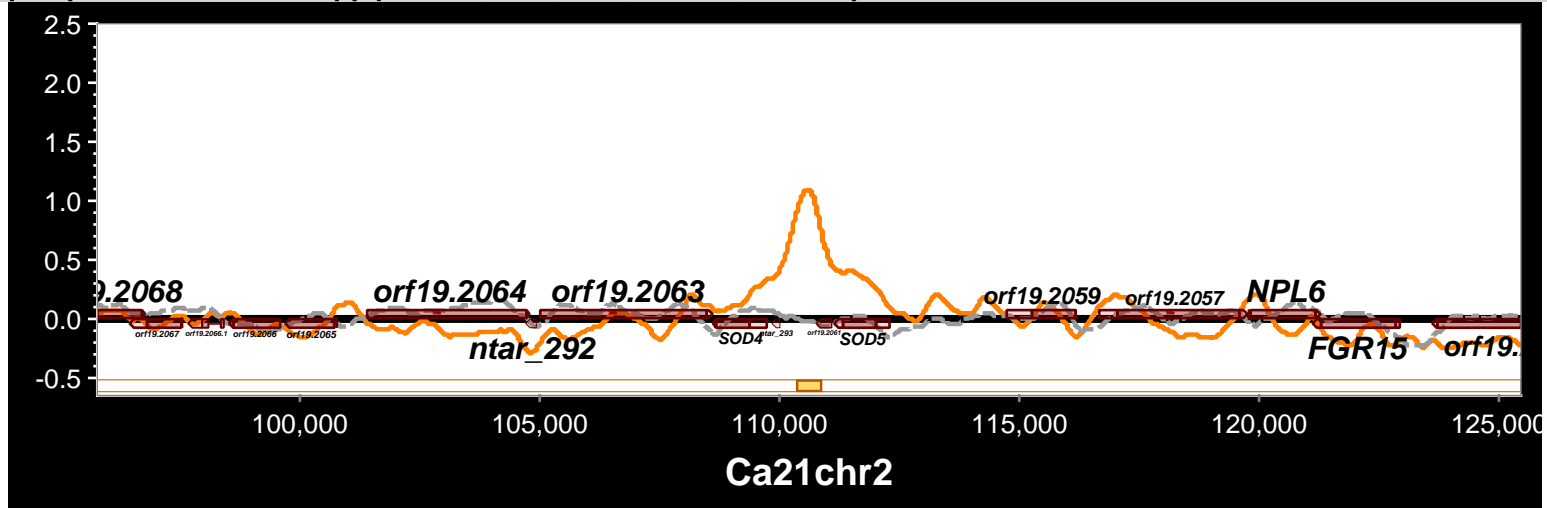

[1.096] Ca21chr1:2260399-2290082 [+] [orf19.4900, GCA1, orf19.4901, orf19.4898, orf19.4897]

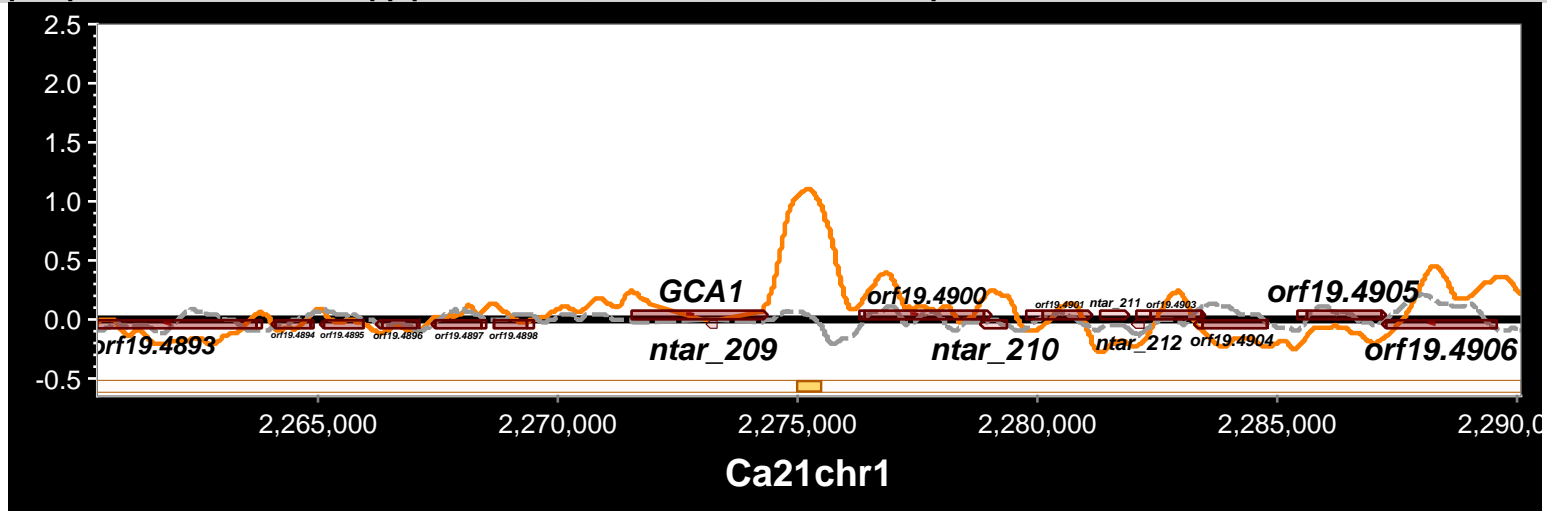

[1.076] Ca21chr1:1068078-1097761 [+] [GAT2, orf19.450, orf19.4057, orf19.449, orf19.4059]

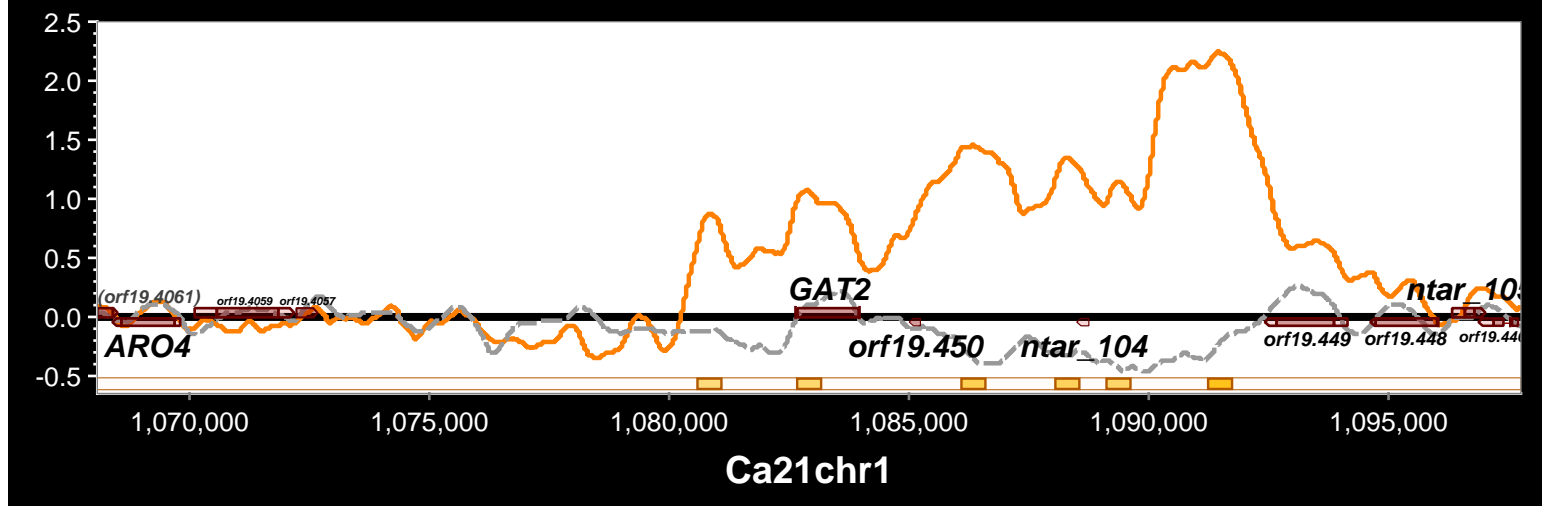

[1.057] Ca21chrR:1706706-1736389 [+] [EFG1, orf19.609, tG(GCC)1, orf19.607, orf19.612]

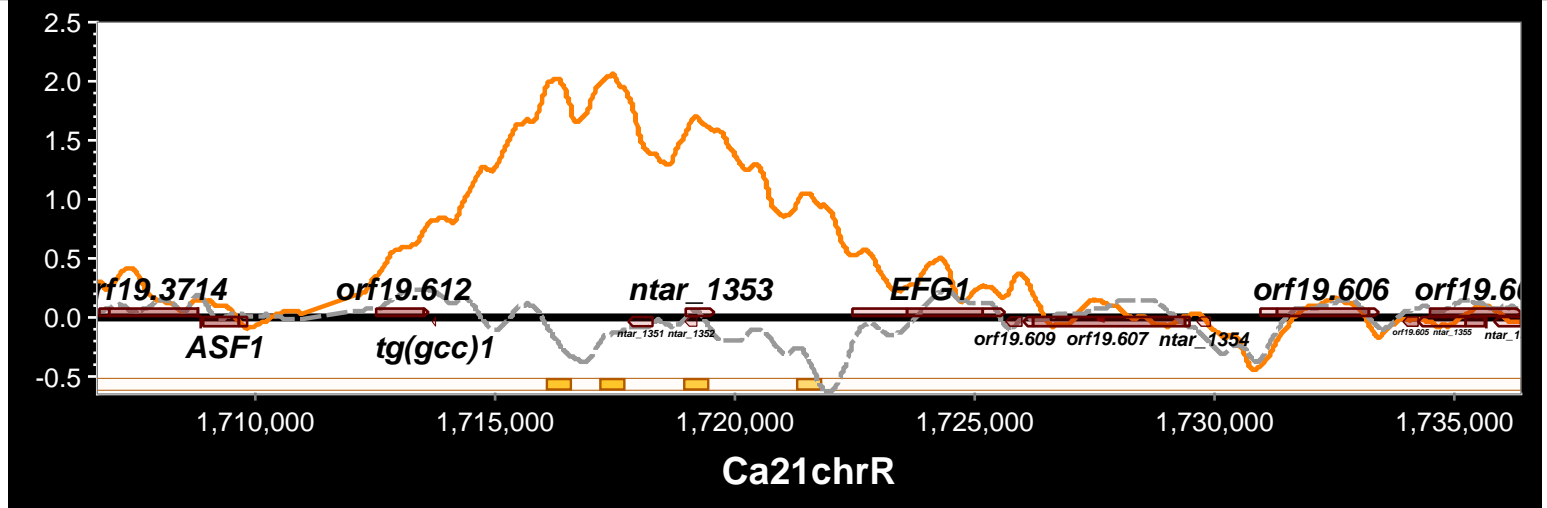

[1.043] Ca21chr5:98869-128552 [+] [AGA1, orf19.936, orf19.934, orf19.933, orf19.938]

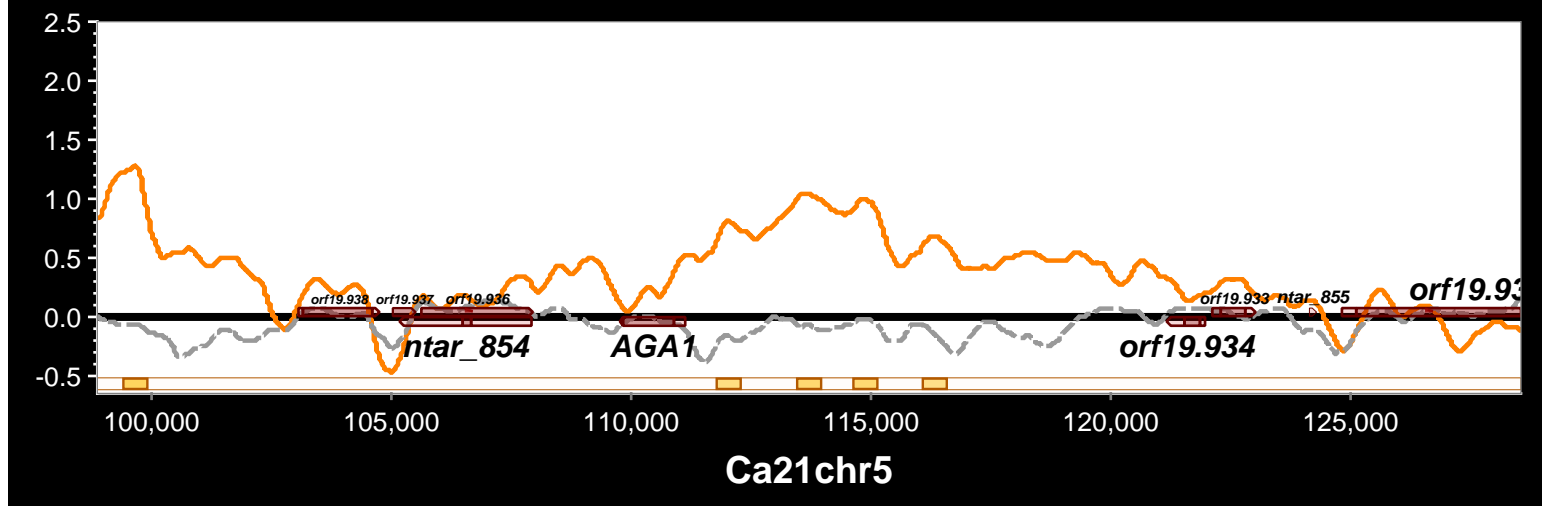

[1.043] Ca21chr7:894775-924458 [+] [orf19.7152, orf19.7153, UTP18, orf19.7151, NRG1]

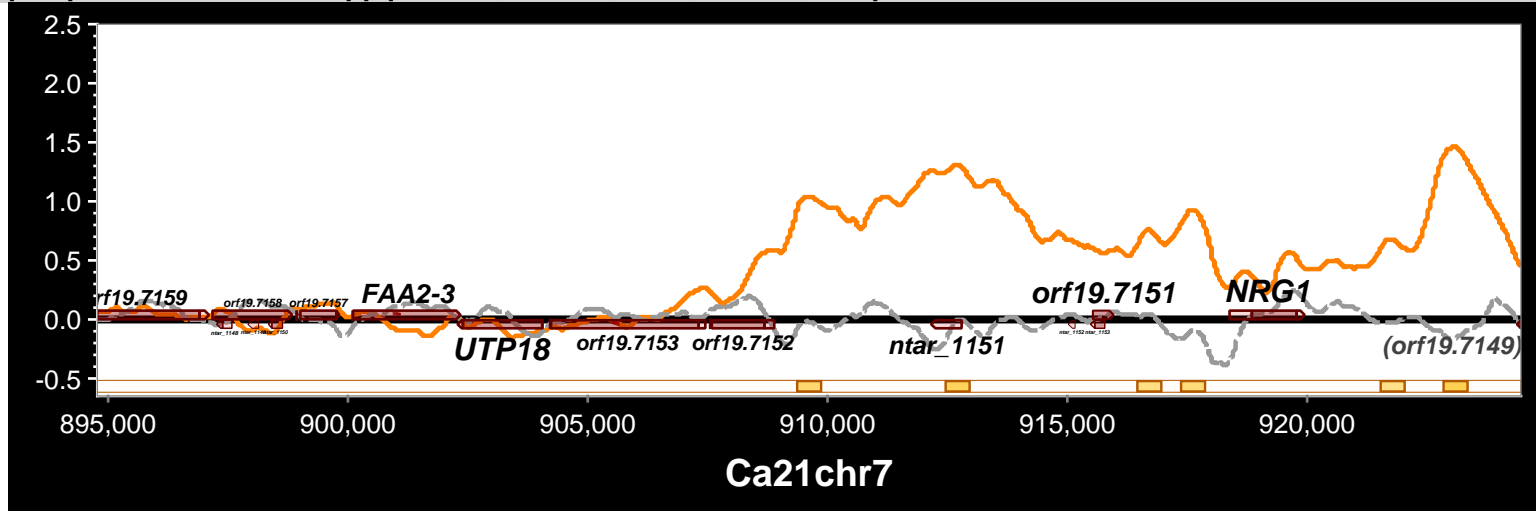

[1.041] Ca21chr1:1820539-1850222 [+] [OLE1, orf19.5114.1, orf19.5114, SDS24, ADH2]

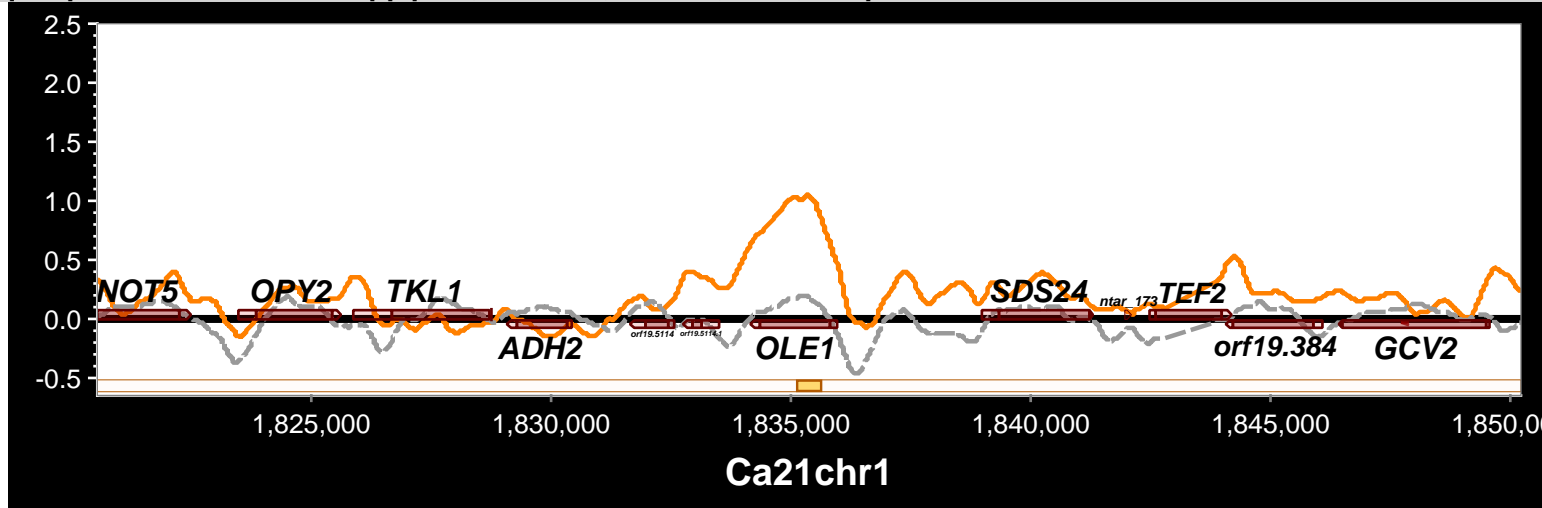

[1.038] Ca21chr3:941872-971555 [+] [orf19.5910, TEC1, CMK1, MAK21, orf19.5915]

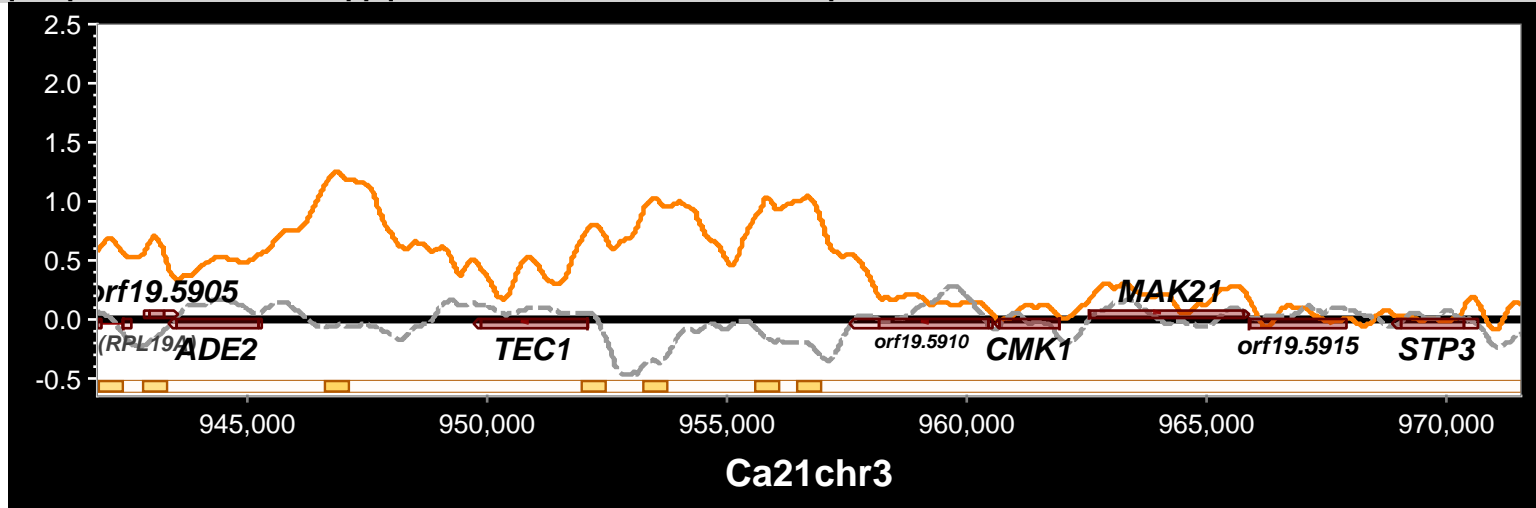

[1.036] Ca21chr1:2895996-2925679 [+] [STP2, orf19.4960, orf19.4962, orf19.4959, orf19.4963]

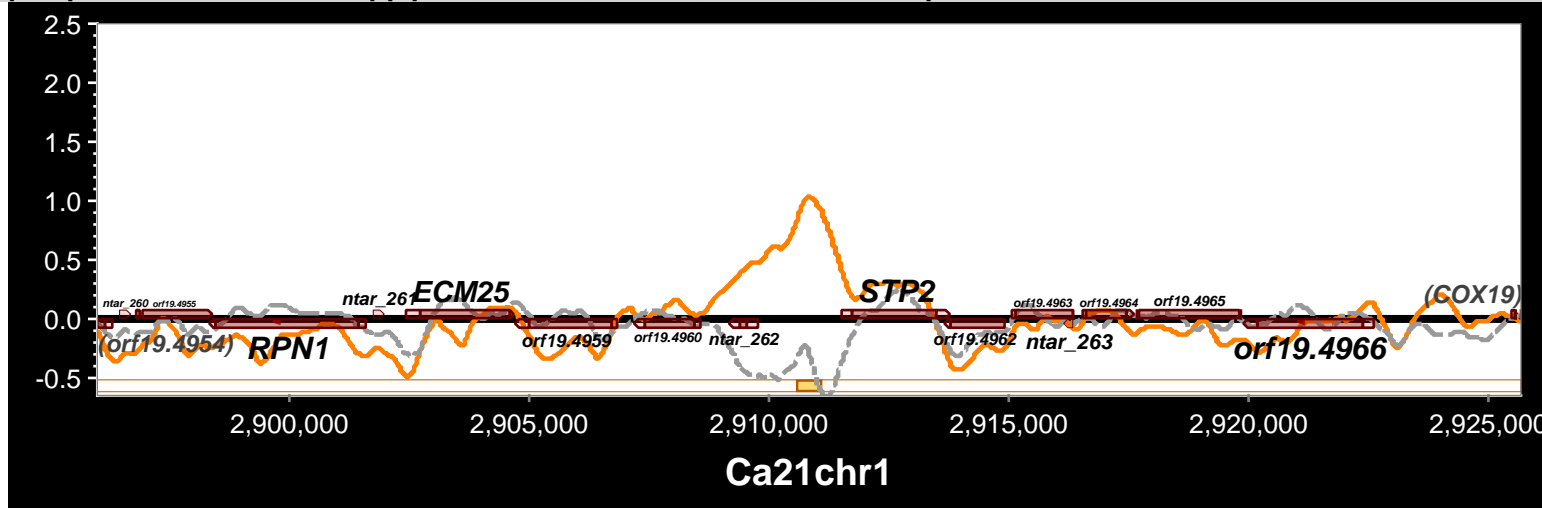

[1.035] Ca21chr3:940997-970680 [+] [TEC1, orf19.5910, CMK1, MAK21, ADE2]

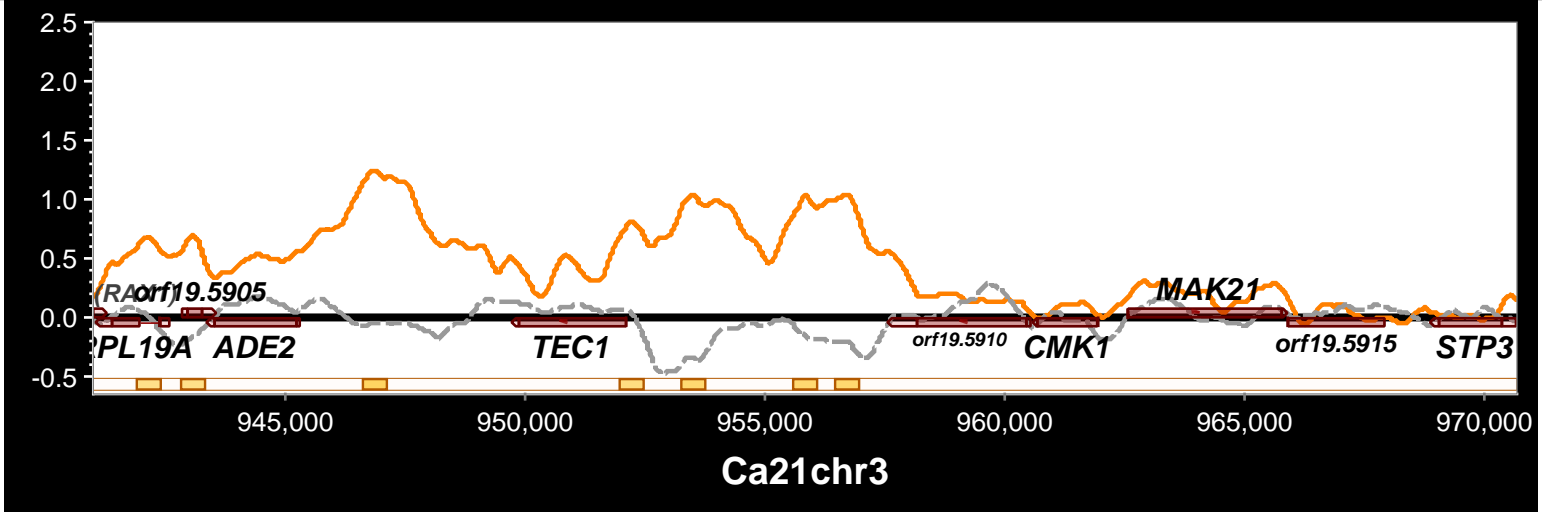

[1.033] Ca21chr7:438739-468422 [+] [CUP9, EXO70, LIG1, GRX1, orf19.6509]

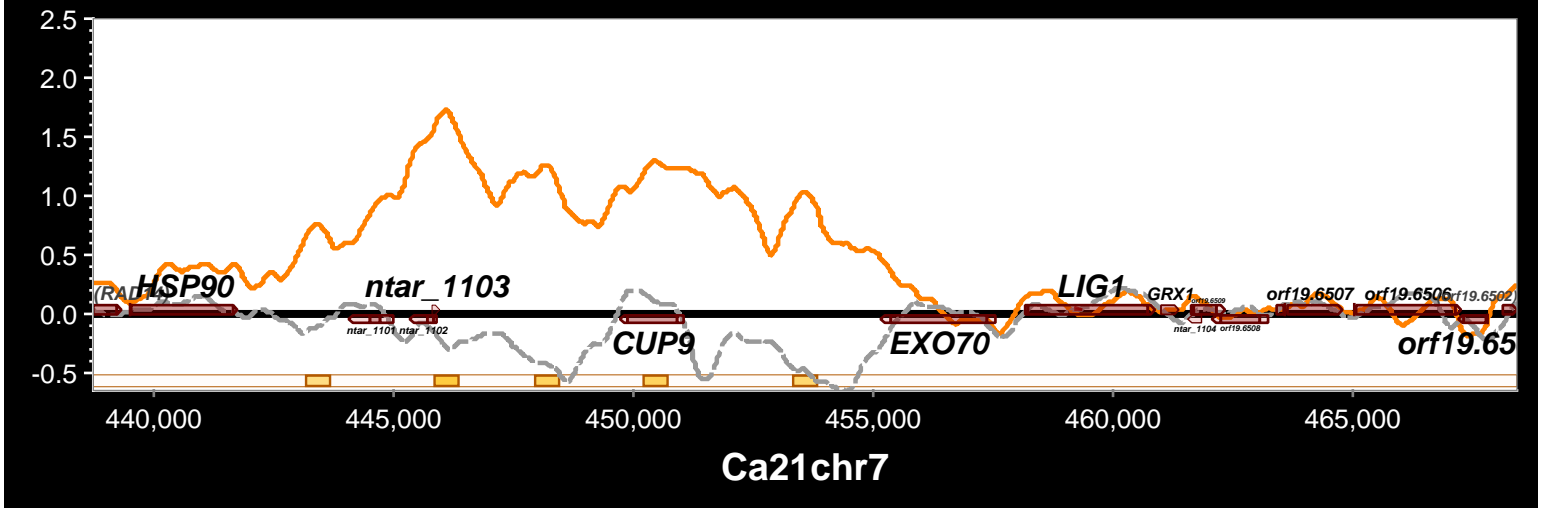

[1.032] Ca21chr1:2840437-2870120 [+] [orf19.4936.1, orf19.4936, CHS3, OP4, FAD3]

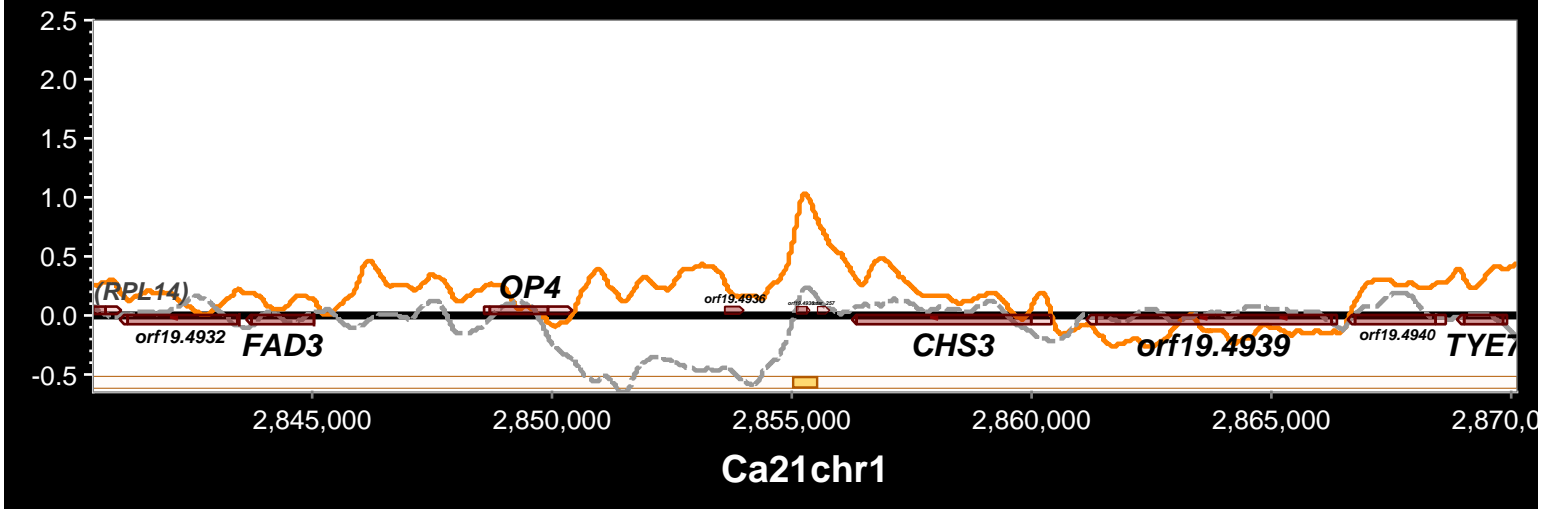

[1.029] Ca21chr3:1344721-1374404 [+] [orf19.7381, orf19.7380, CAM1, MNN9, NOG1]

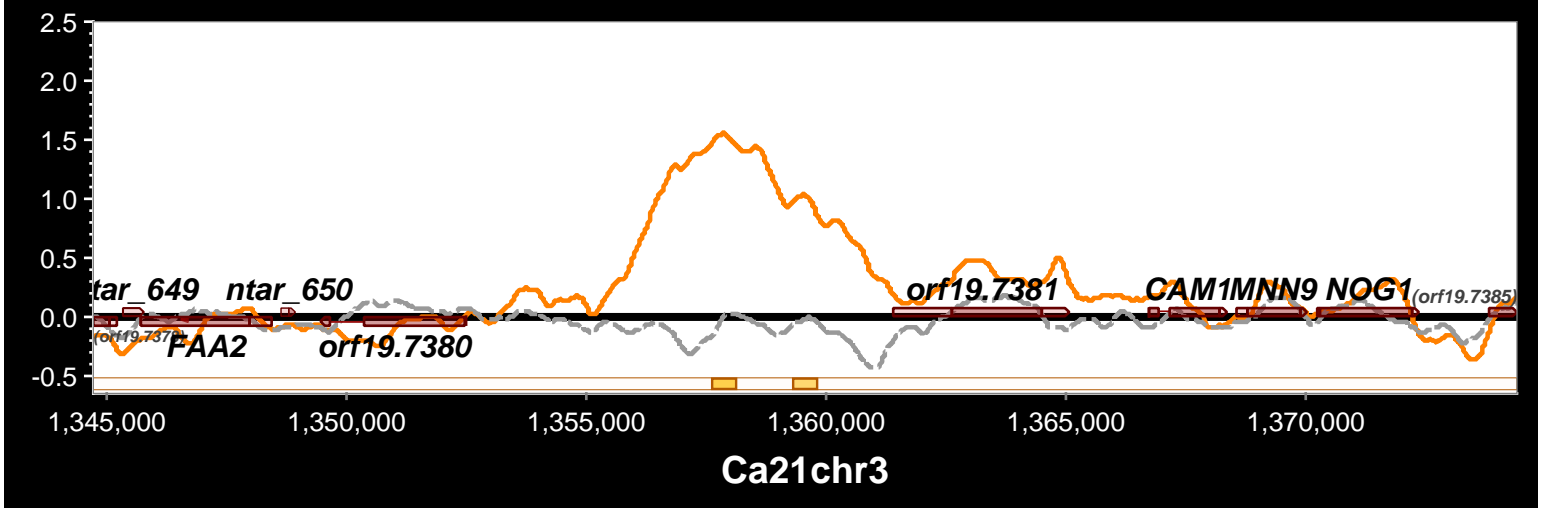

[1.023] Ca21chr3:938665-968348 [+] [TEC1, orf19.5910, ADE2, CMK1, MAK21]

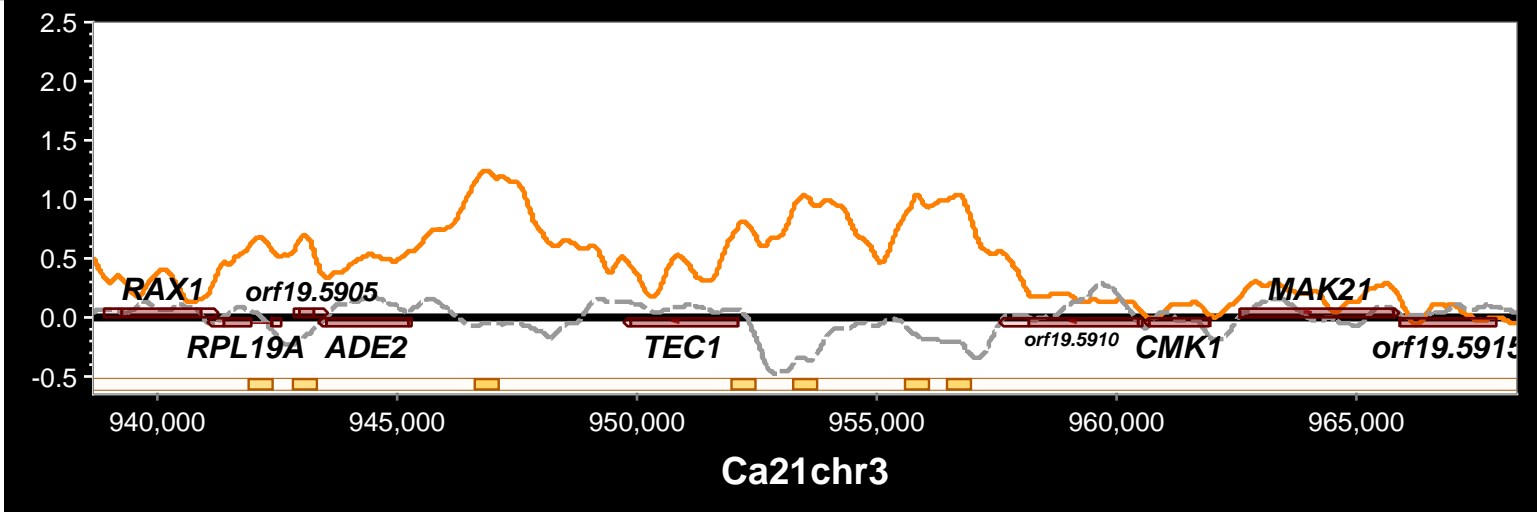

[1.02] Ca21chrR:858976-888659 [+] [orf19.467, IFF9, orf19.4358, orf19.4357, HST7]

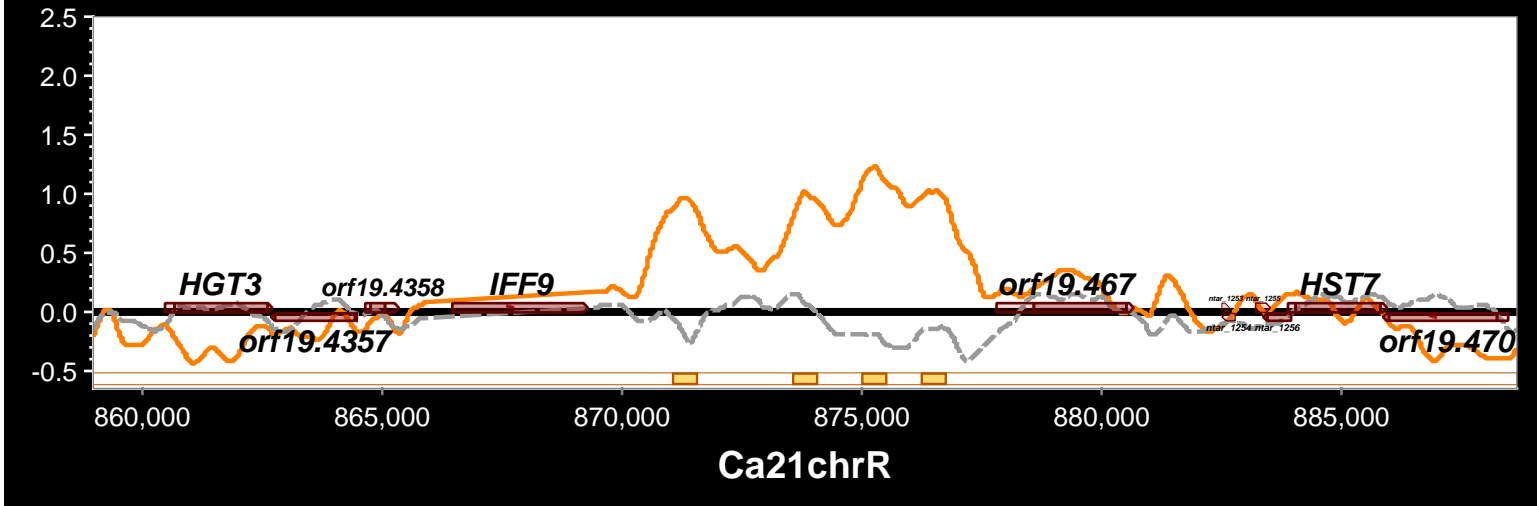

[1.016] Ca21chrR:861658-891341 [+] [orf19.467, HST7, IFF9, orf19.4358, orf19.470]

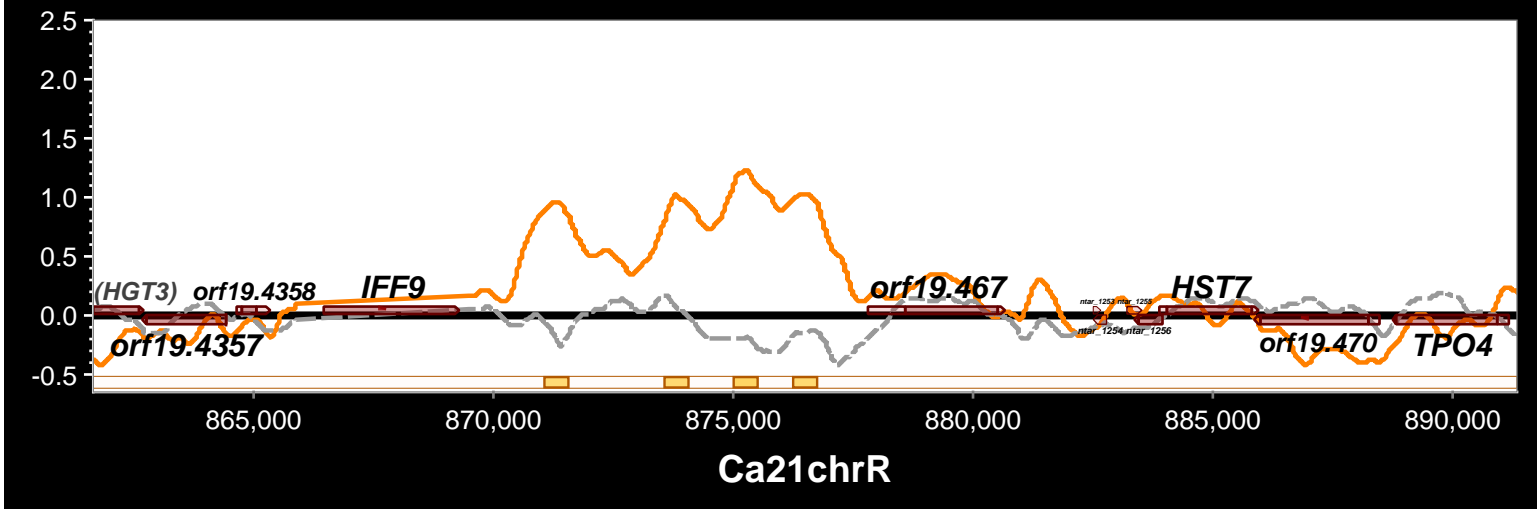

[1.014] Ca21chr6:693166-722849 [+] [orf19.5626, orf19.5625, ARP4, orf19.5627, GLC3]

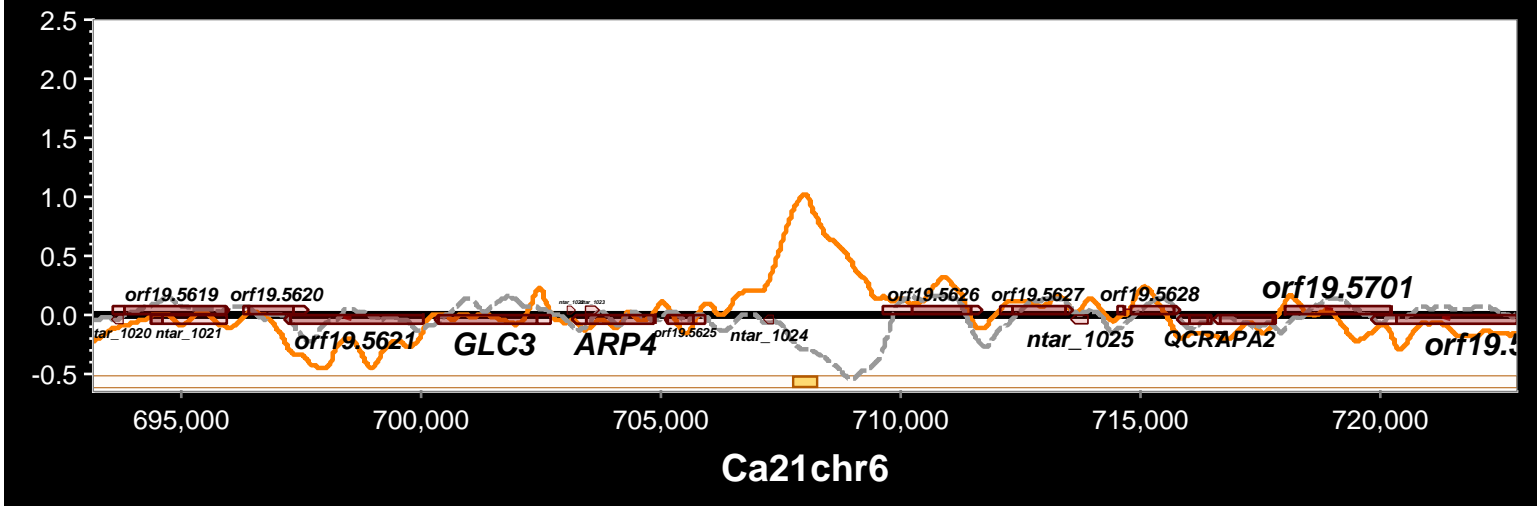

[1.01] Ca21chr2:717627-747310 [+] [orf19.871, orf19.872, orf19.873, COX6, orf19.874]

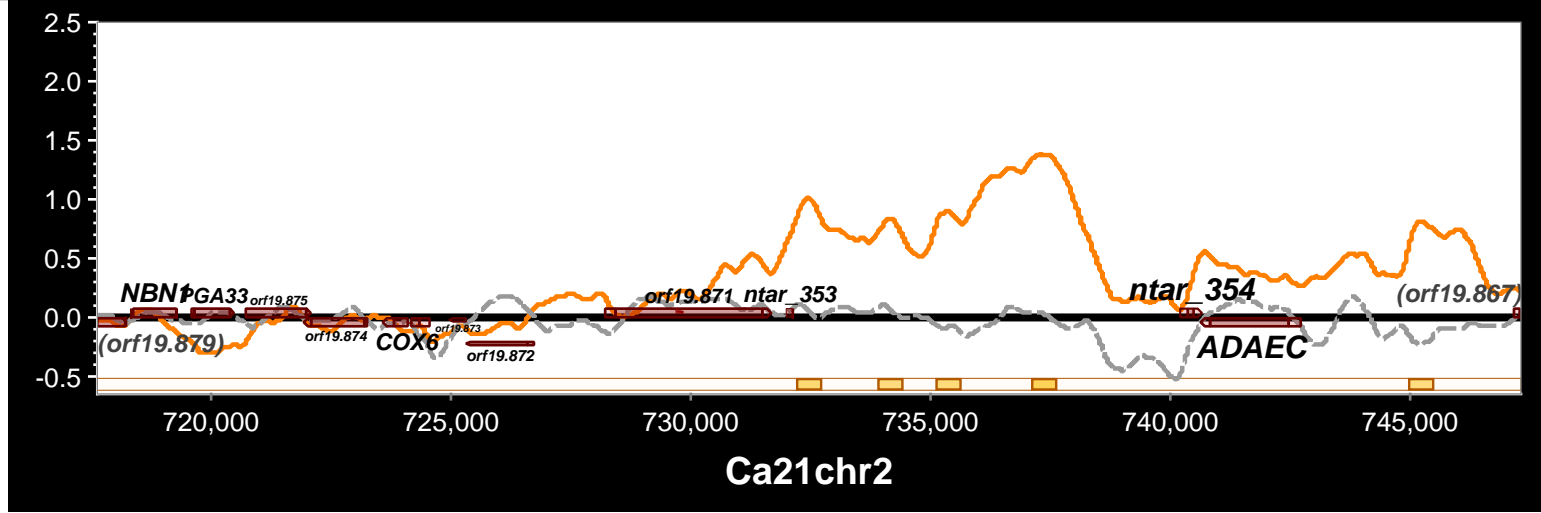

[1.008] Ca21chr7:596455-626138 [+] [LIP5, ERG5, orf19.5177, PRX1, NIK1]

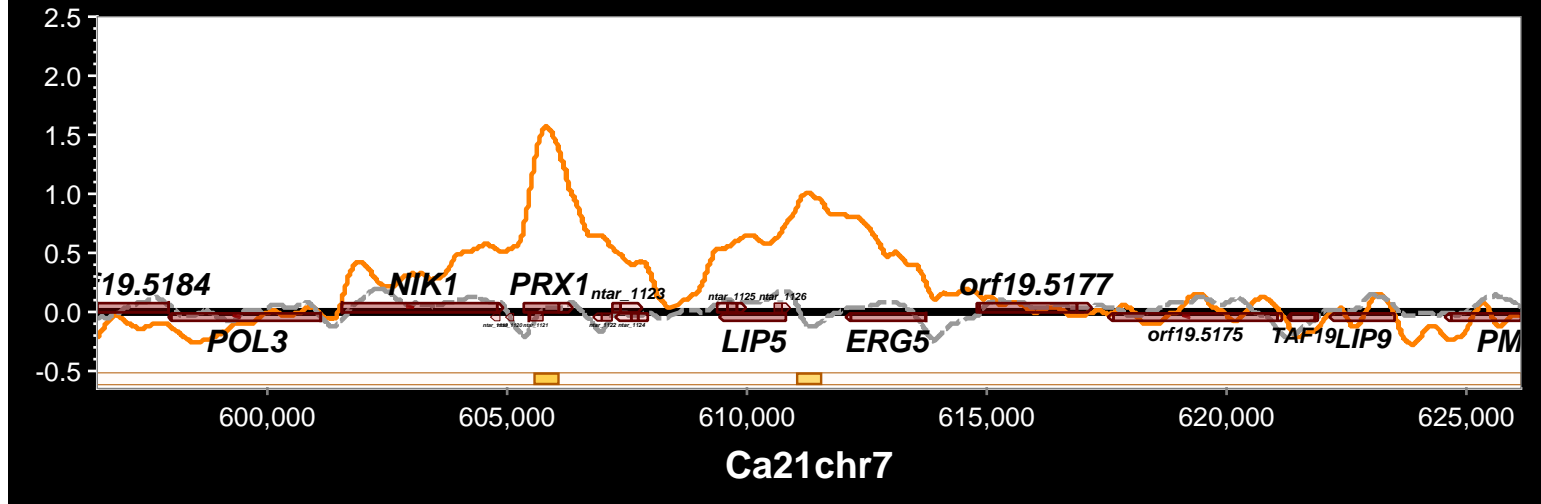

[1.007] Ca21chr1:284120-313803 [+] [orf19.3337, orf19.3338, SOD2, orf19.3335, RPS21]

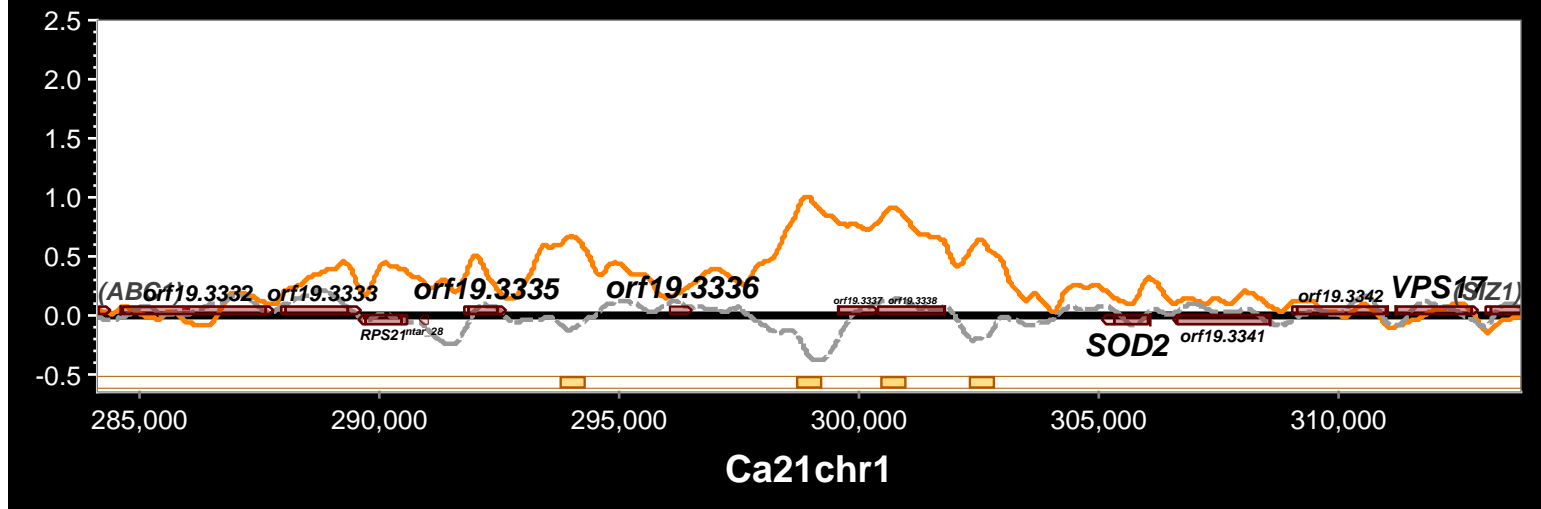

[0.999] Ca21chr5:100042-129725 [+] [AGA1, orf19.934, orf19.933, orf19.936, orf19.932]

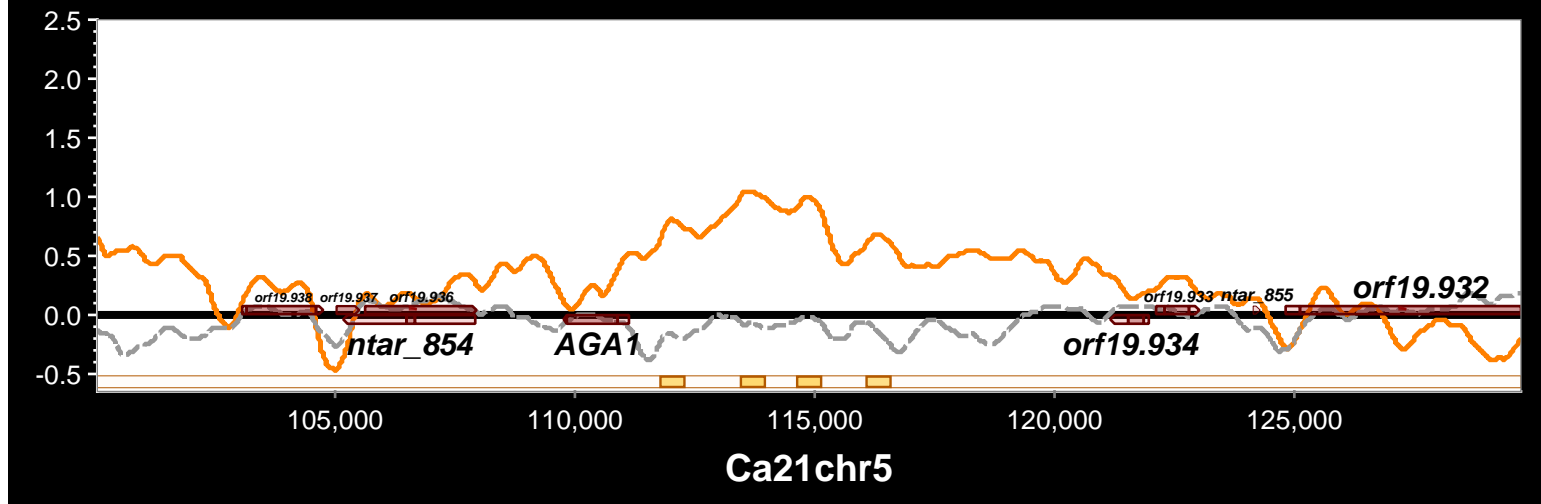



[0.993] Ca21chr4:1030634-1060317 [+] [CSR1, orf19.3793, AGP3, orf19.3792, FGR10]

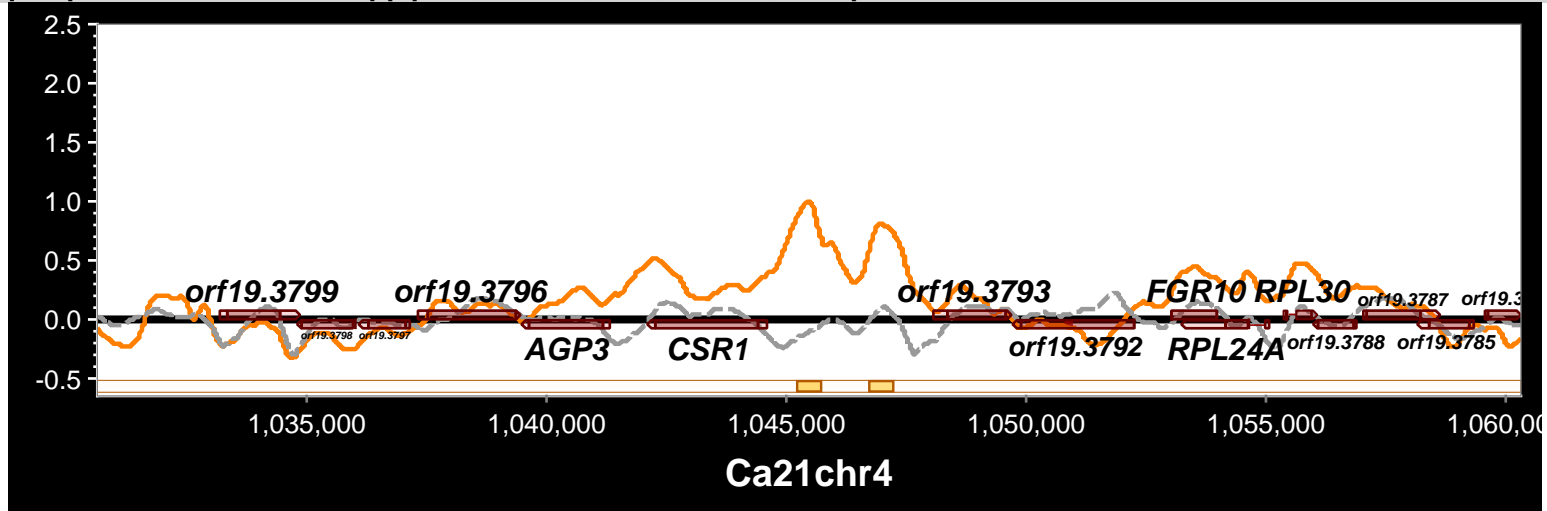

[0.98] Ca21chrR:1979614-2009297 [+] [orf19.7336, PRE8, orf19.7337, ELF1, FCY24]

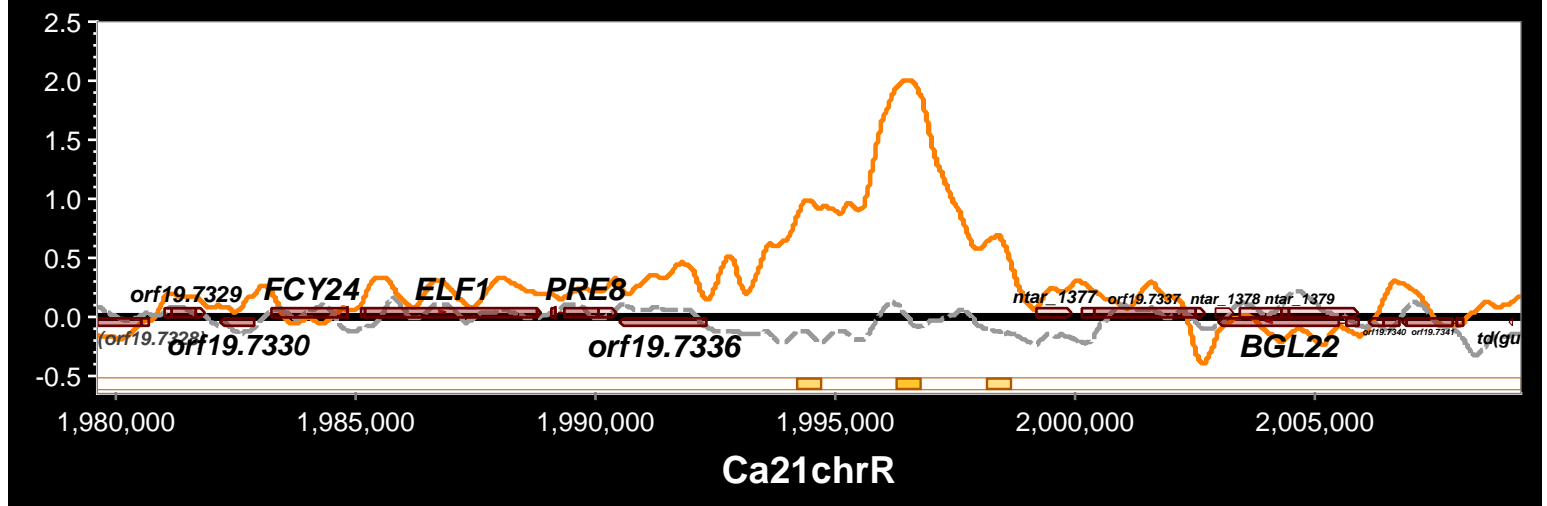

[0.961] Ca21chrR:856472-886155 [+] [IFF9, orf19.4358, orf19.4357, orf19.467, HGT3]

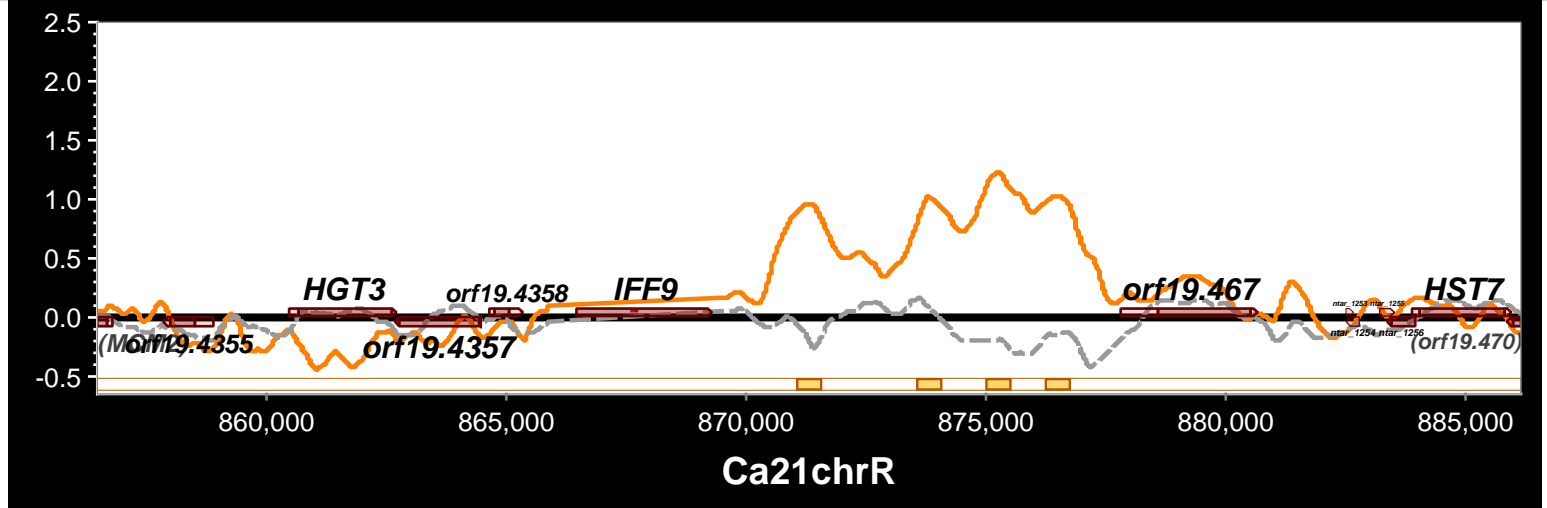

[0.96] Ca21chr5:222116-251799 [+] [orf19.1961, orf19.1963, CLN3, orf19.1964, BUD23]

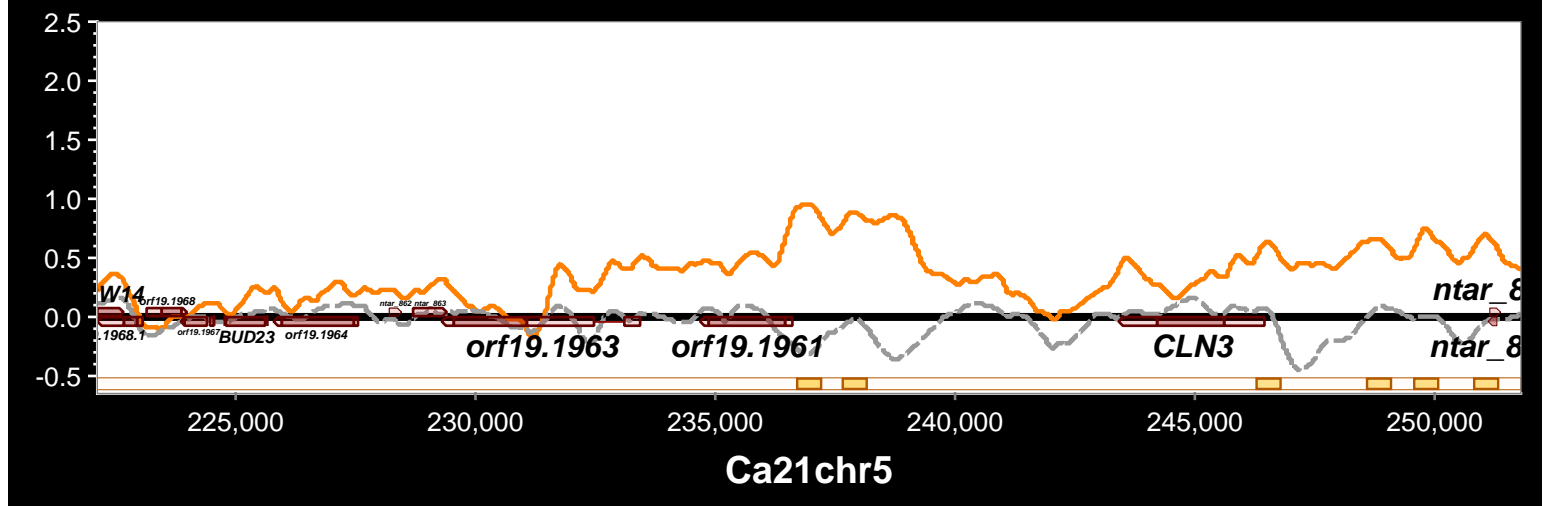

[0.96] Ca21chr7:98684-128367 [+] [orf19.7054, GAC1, orf19.7056, orf19.7057, orf19.7058]

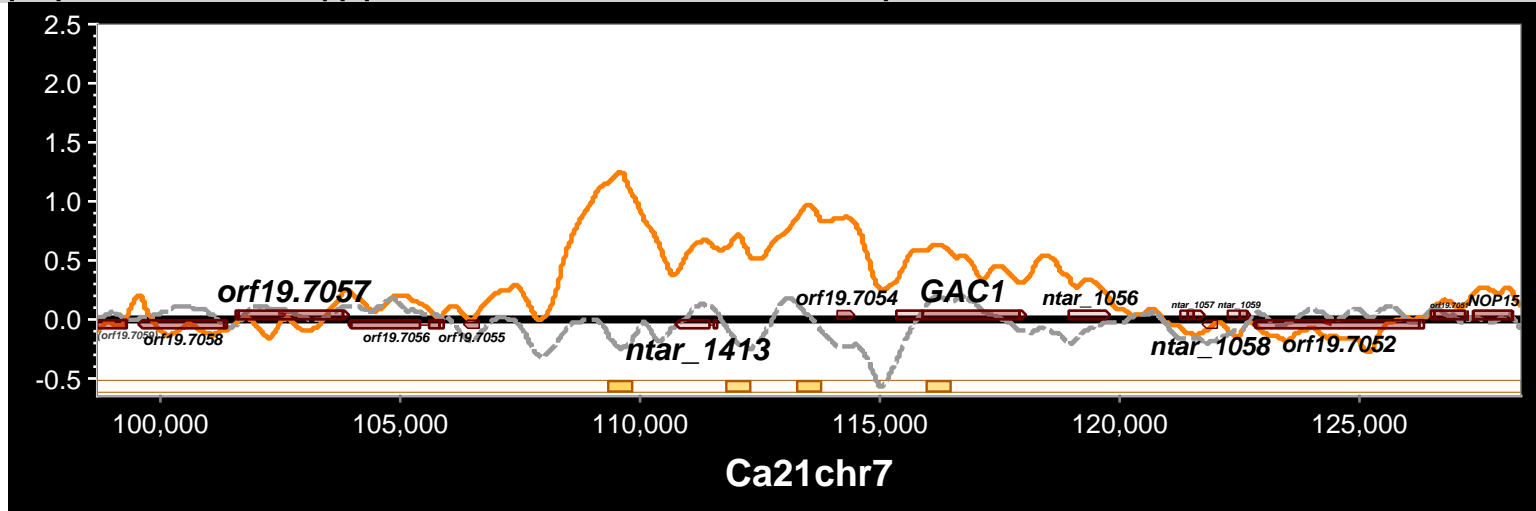

[0.956] Ca21chr5:482072-511755 [+] [PTH2, orf19.4230, orf19.4229, PTH1, THR4]

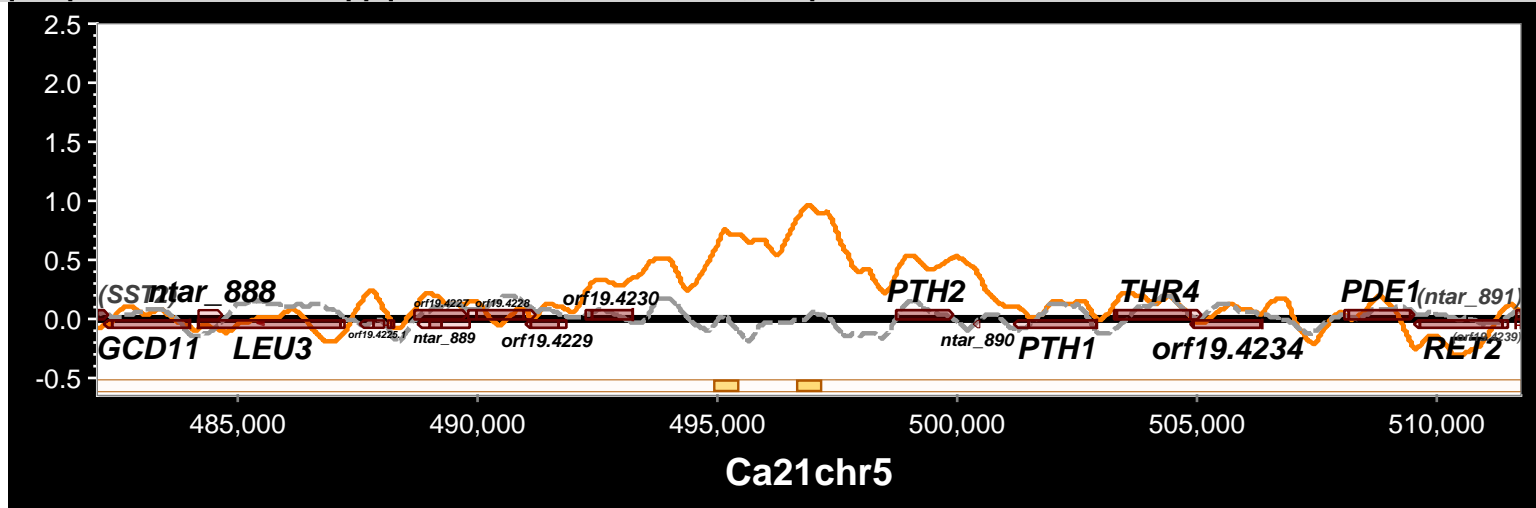

[0.955] Ca21chr7:55666-85349 [+] [orf19.7077, orf19.7078, orf19.7079, orf19.7076, orf19.7074]

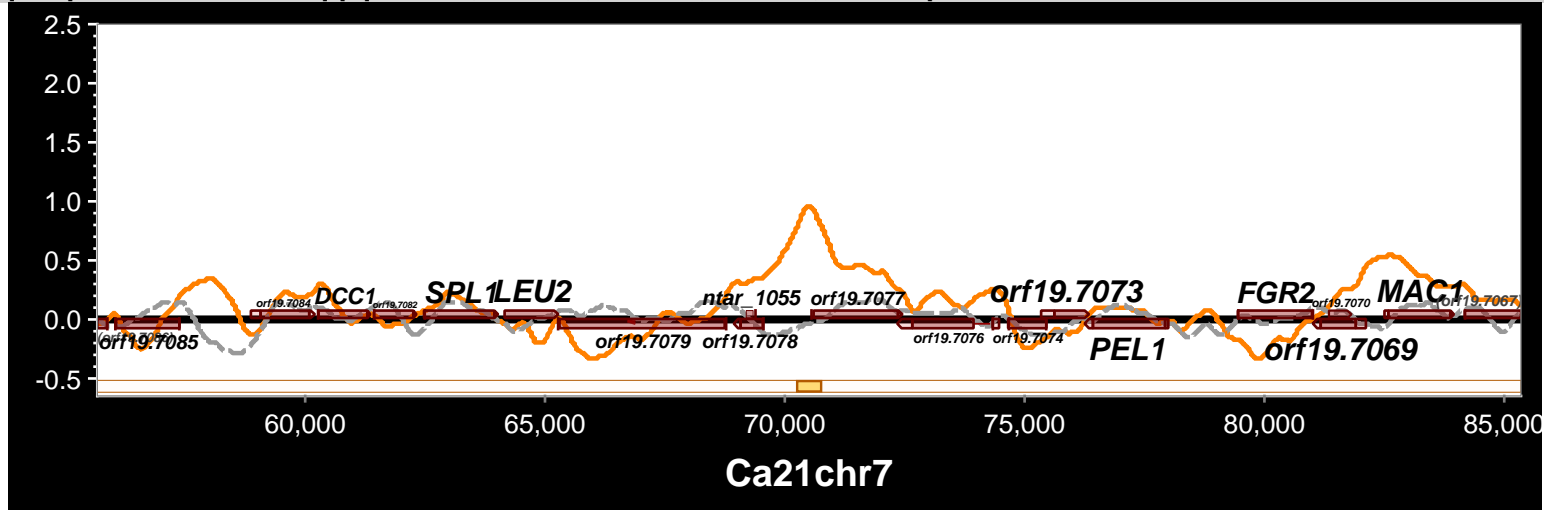

[0.952] Ca21chr1:521706-551389 [+] [tR(UCU)4, orf19.2943.5, DIP5, PUT4, HNM4]

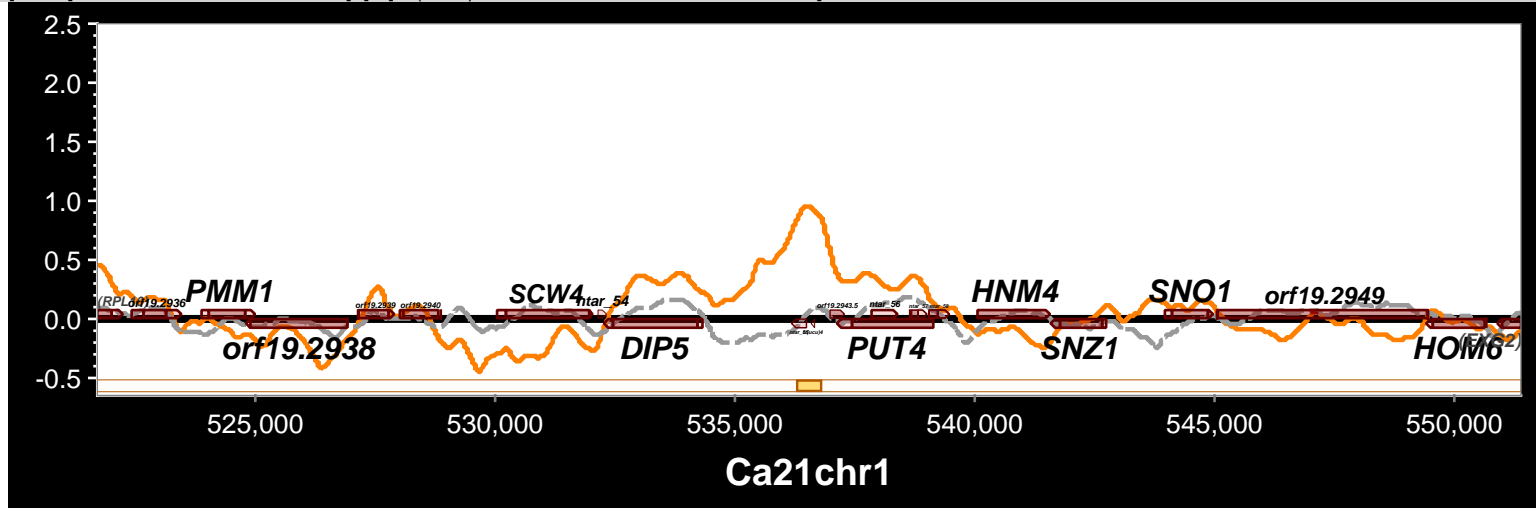

[0.951] Ca21chr3:1399677-1429360 [+] [MMS21, ALS6, MUB1, OAC1, orf19.7410]

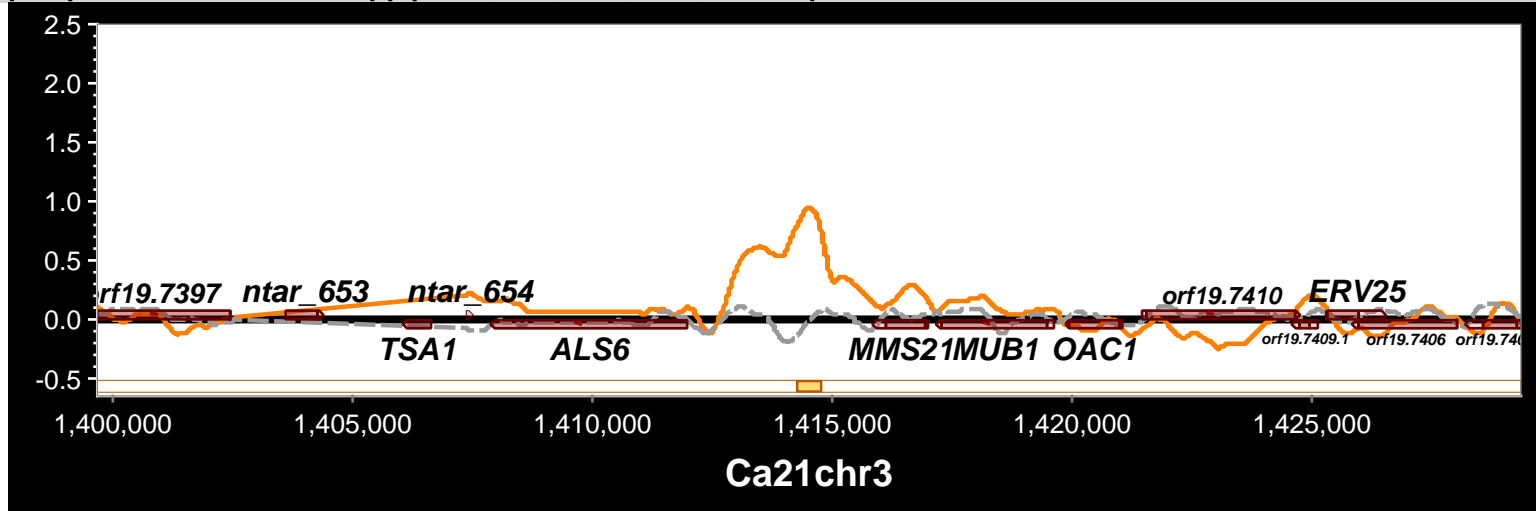

[0.949] Ca21chr3:1094935-1124618 [+] [orf19.5991, orf19.5989, orf19.5987, THI4, WOR2]

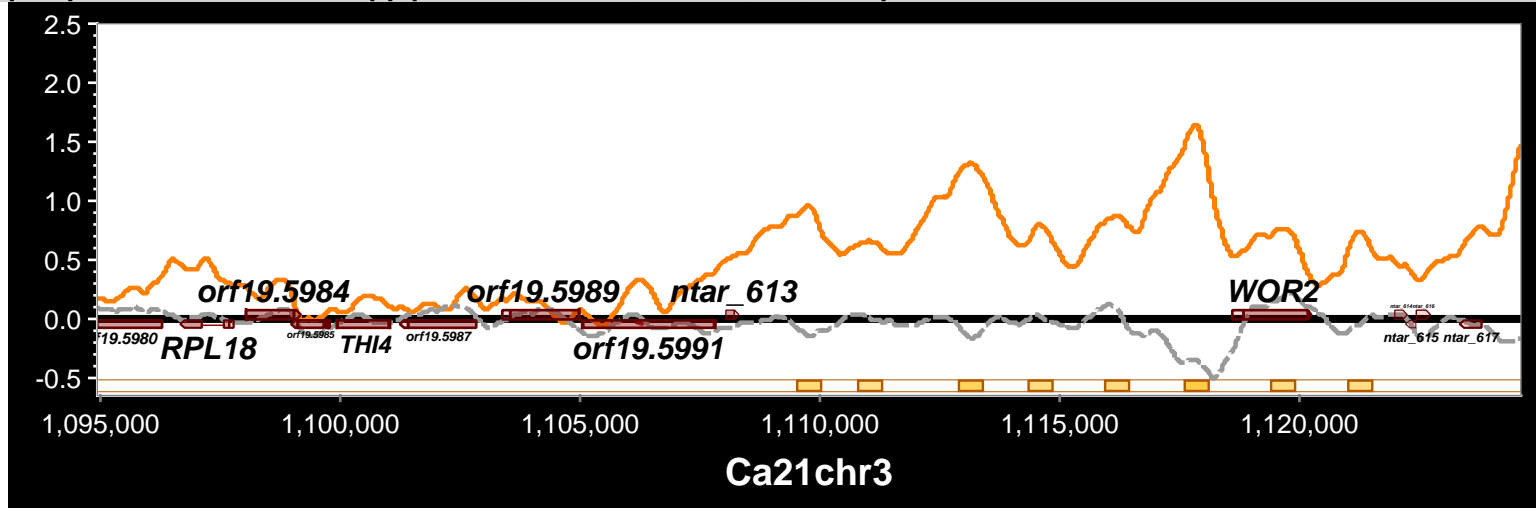

[0.944] Ca21chr1:1309743-1339426 [+] [orf19.1821, UME6, orf19.177, orf19.1823, PGA50]

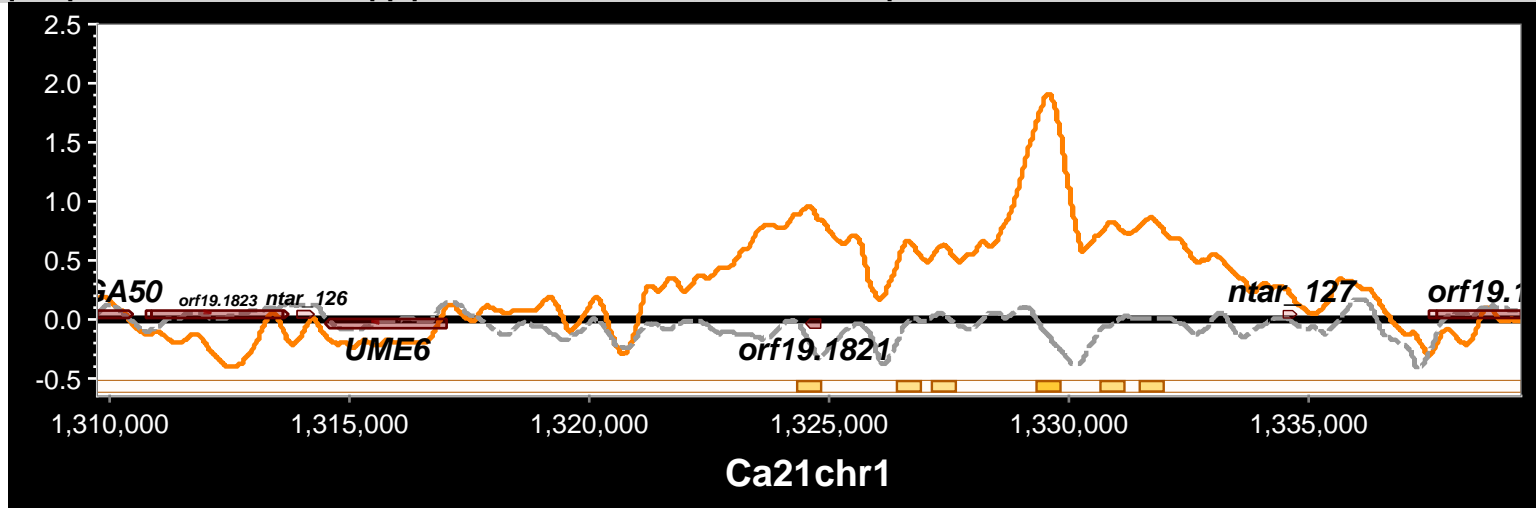

[0.943] Ca21chrR:2092039-2121722 [+] [DEF1, YTA6, FGR46, BET2, orf19.7556]

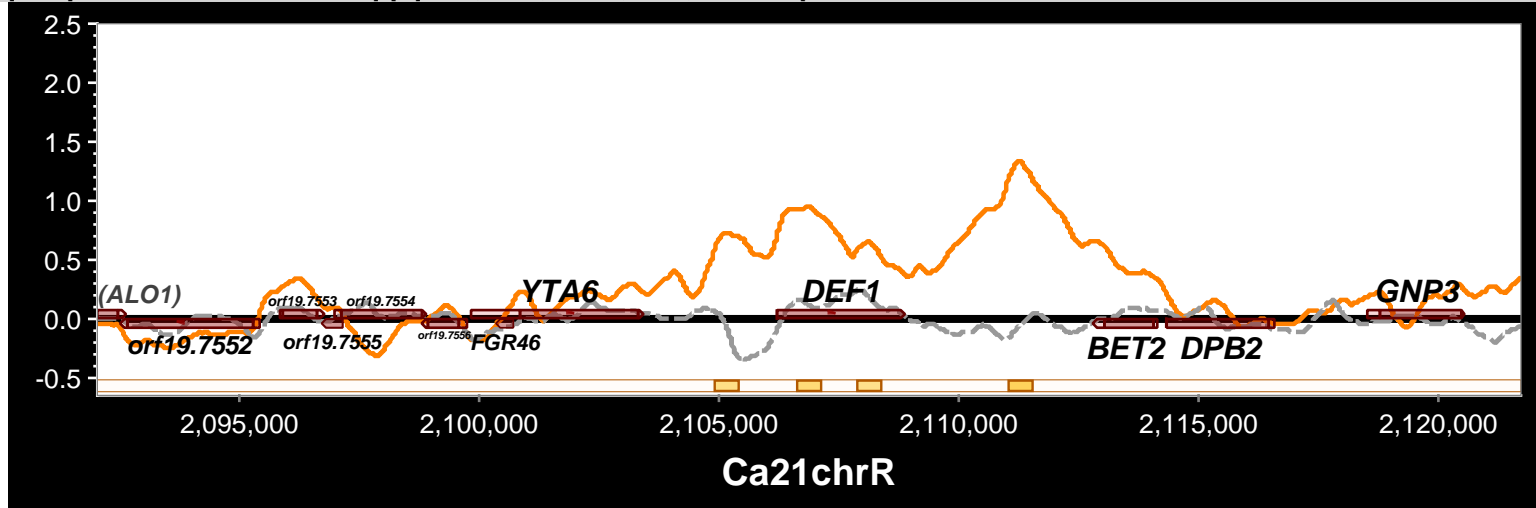

[0.939] Ca21chr5:244131-273814 [+] [CYC3, orf19.1959, orf19.1956, orf19.1955, PUS4]

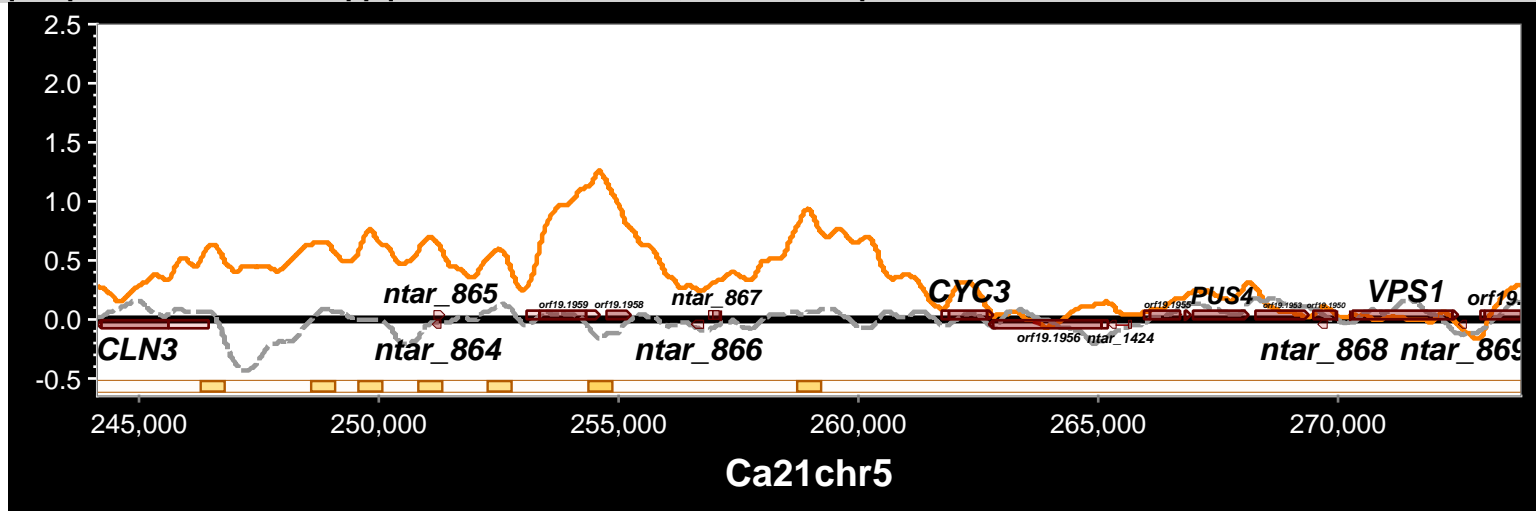

[0.934] Ca21chr3:1457723-1487406 [+] [th(GUG)3, GLG2, AAF1, ECM15, orf19.7433]

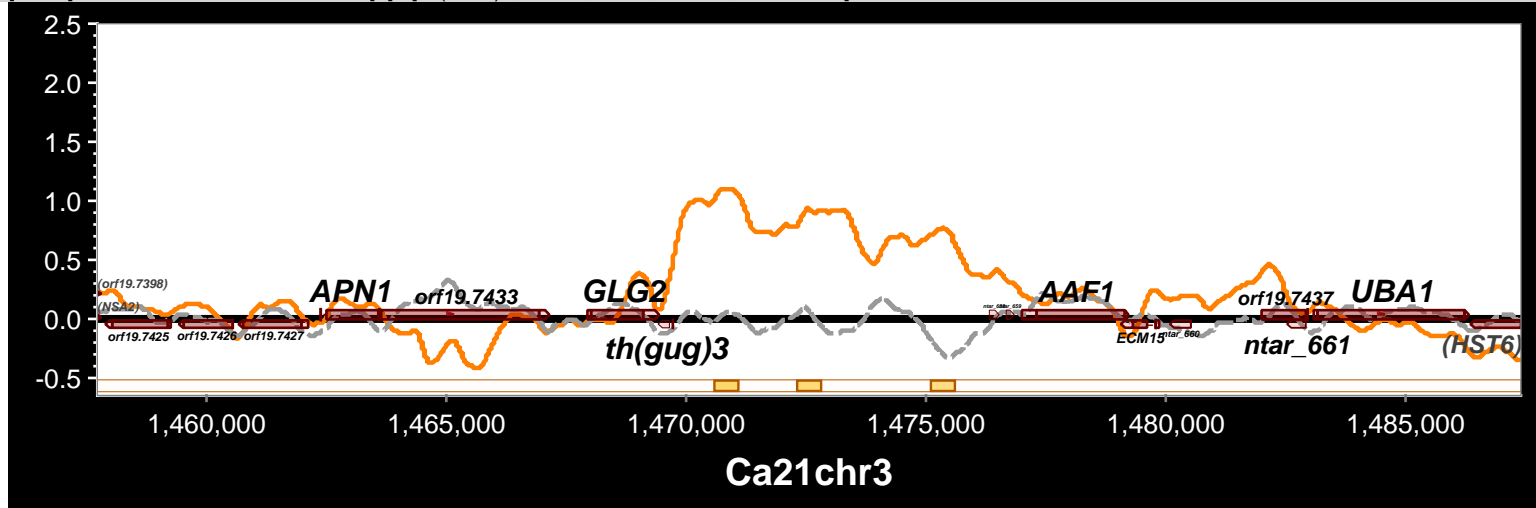

[0.932] Ca21chr5:1035432-1065115 [+] [orf19.3968, orf19.3969, orf19.3970, orf19.3971, PFK1]

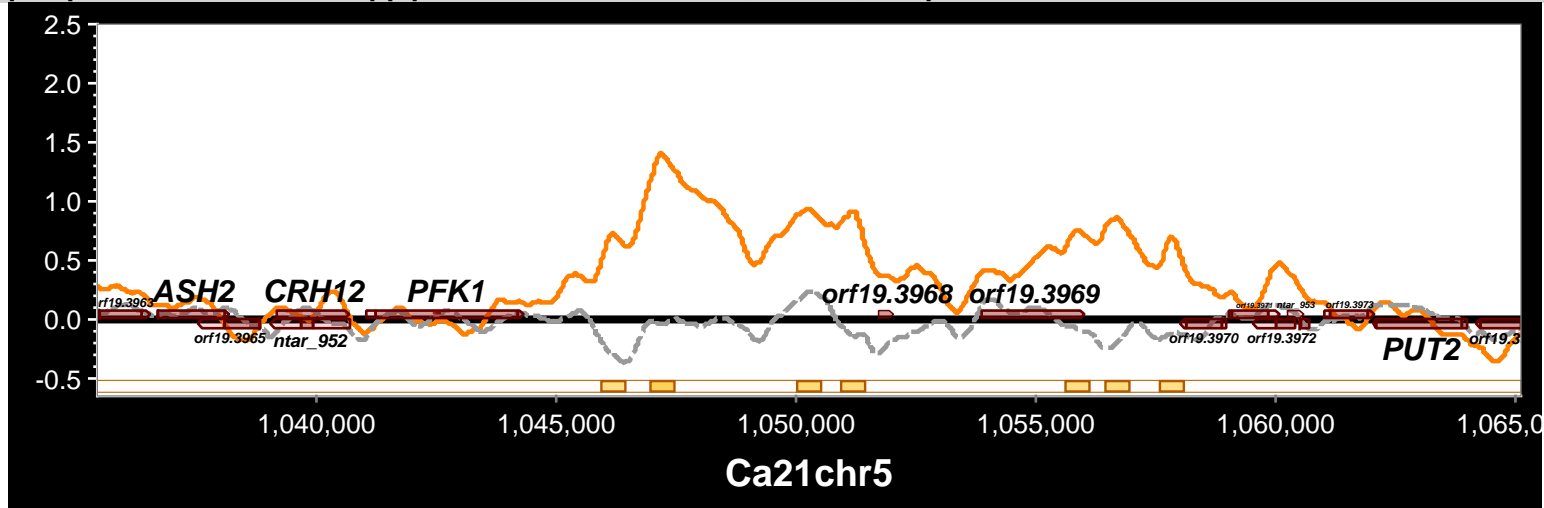

[0.929] Ca21chrR:63837-93520 [+] [orf19.7502, orf19.7501, CDA2, orf19.7504, PXA1]

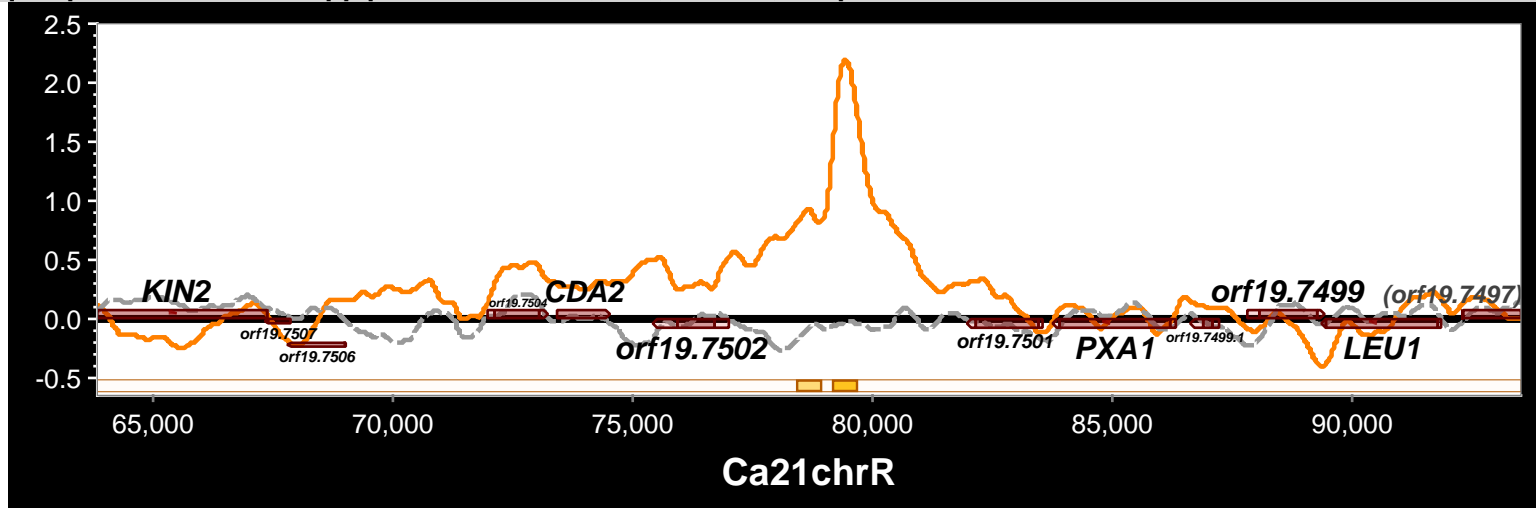

[0.925] Ca21chr2:1128924-1158607 [+] [ts(AGA)4, orf19.6873.1, RPS8A, orf19.6872, orf19.6874]

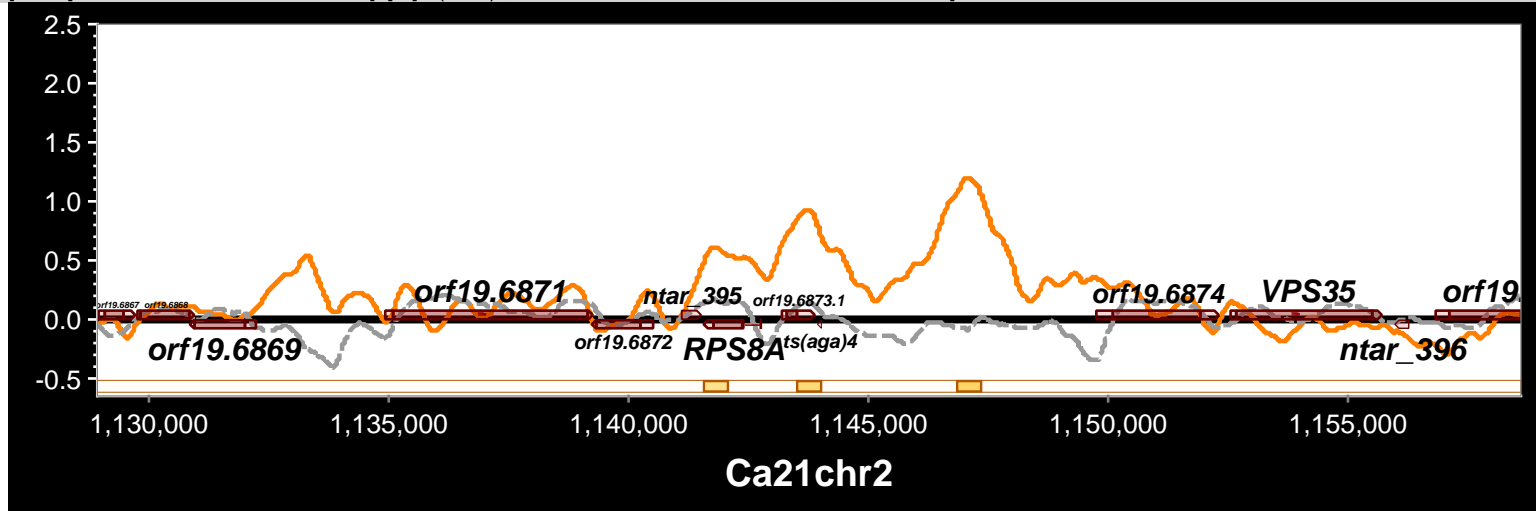

[0.922] Ca21chr4:1508031-1537714 [+] [CZF1, orf19.3128, CCT6, orf19.3125, orf19.3129]

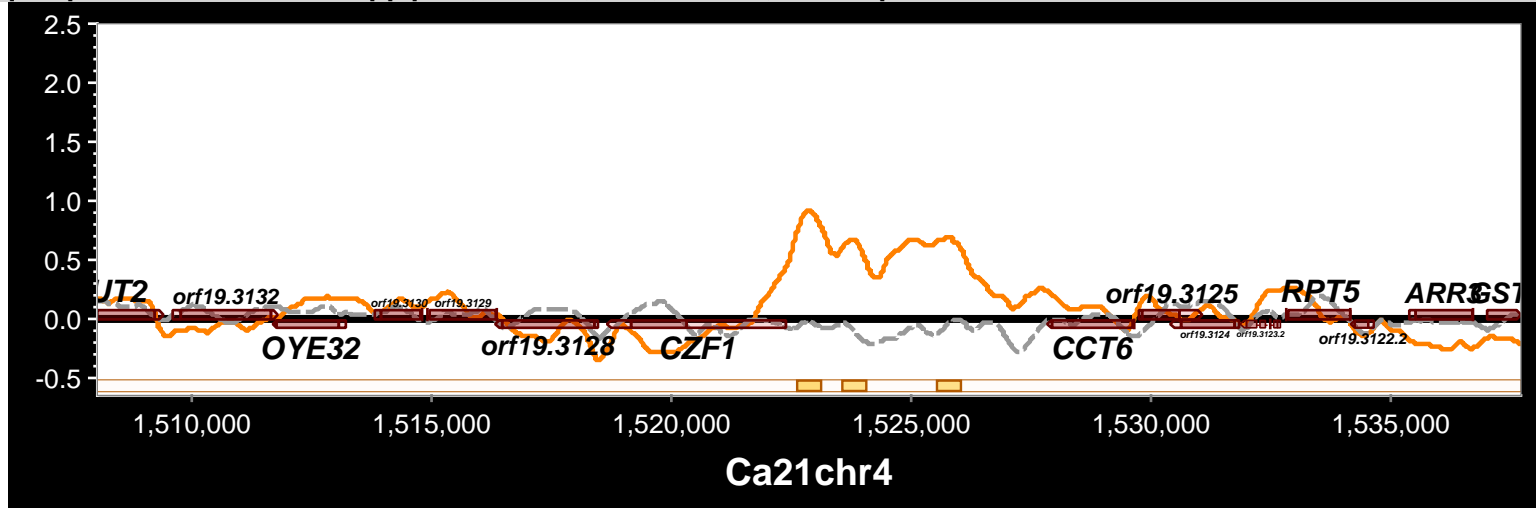

[0.919] Ca21chr4:1085385-1115068 [+] [HAP41, MYO5, orf19.741, ALD6, orf19.736]

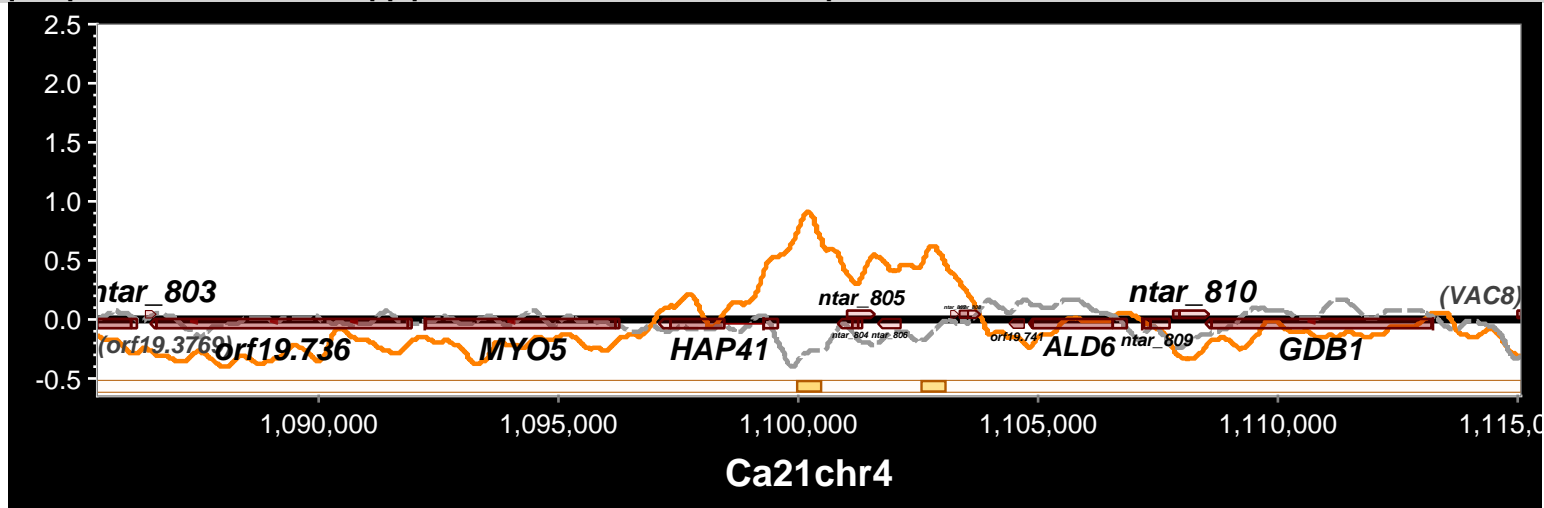

[0.919] Ca21chr7:902780-932463 [+] [NRG1, orf19.7151, orf19.7149, orf19.7152, orf19.7153]

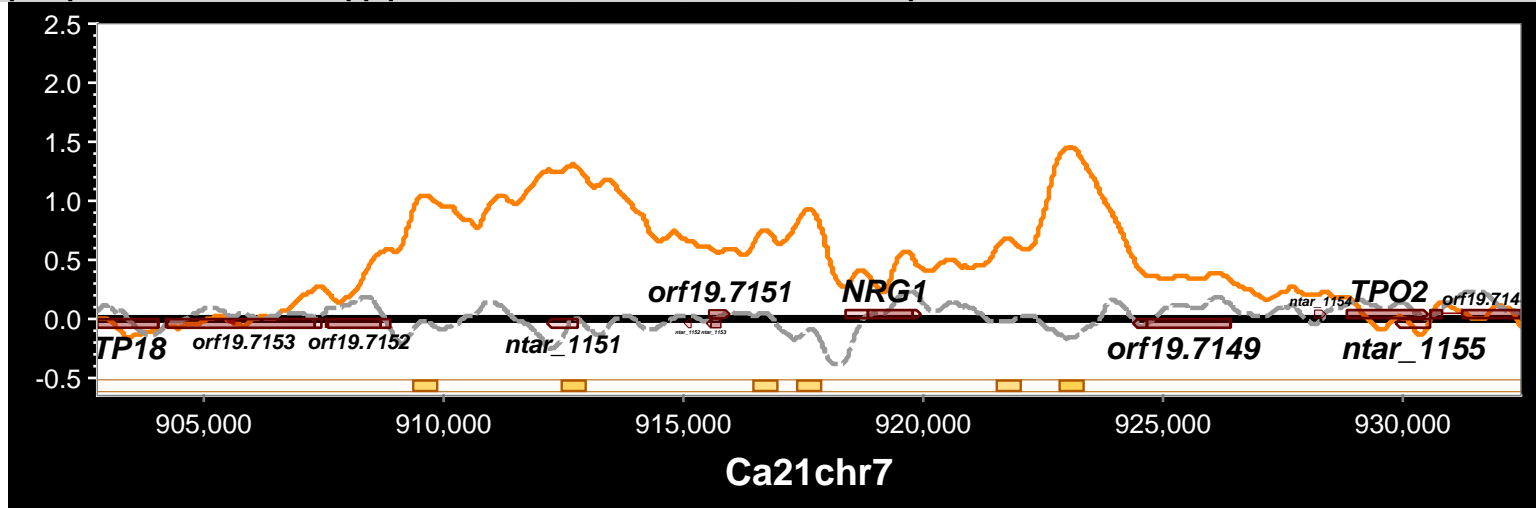

[0.919] Ca21chrR:1005254-1034937 [+] [tS(GCU)2, tS(GCU)1, orf19.1736, orf19.1735, orf19.1737]

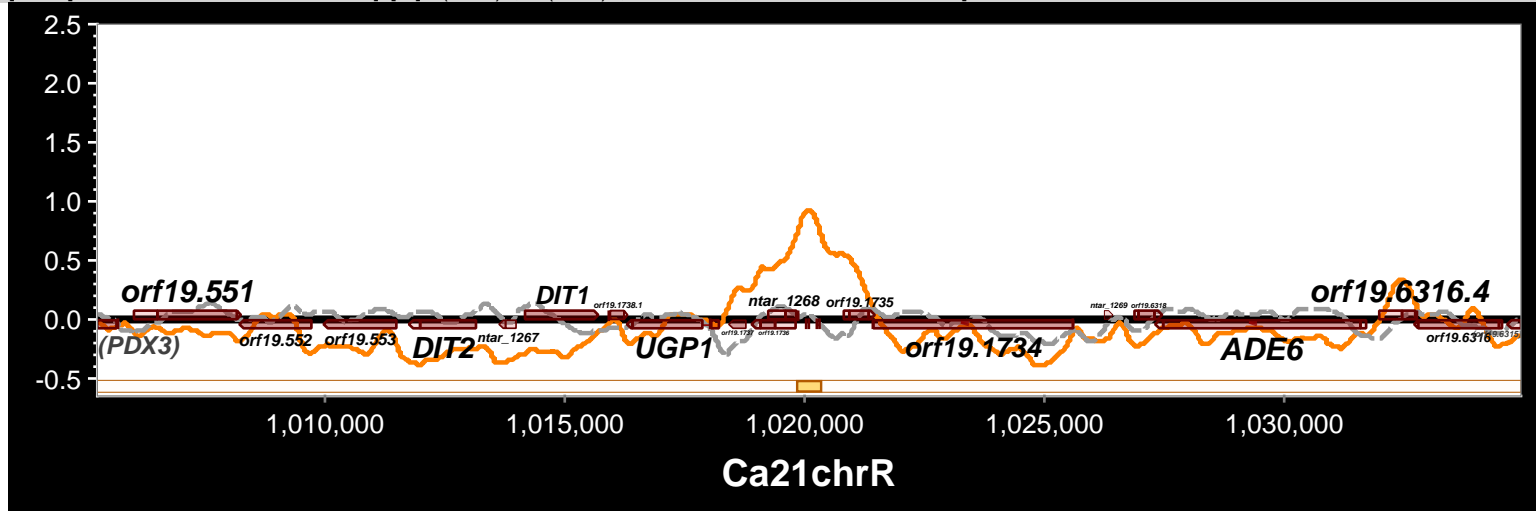

[0.917] Ca21chr1:803070-832753 [+] [orf19.4459, orf19.4461, orf19.4463, BNI4, SEN15]

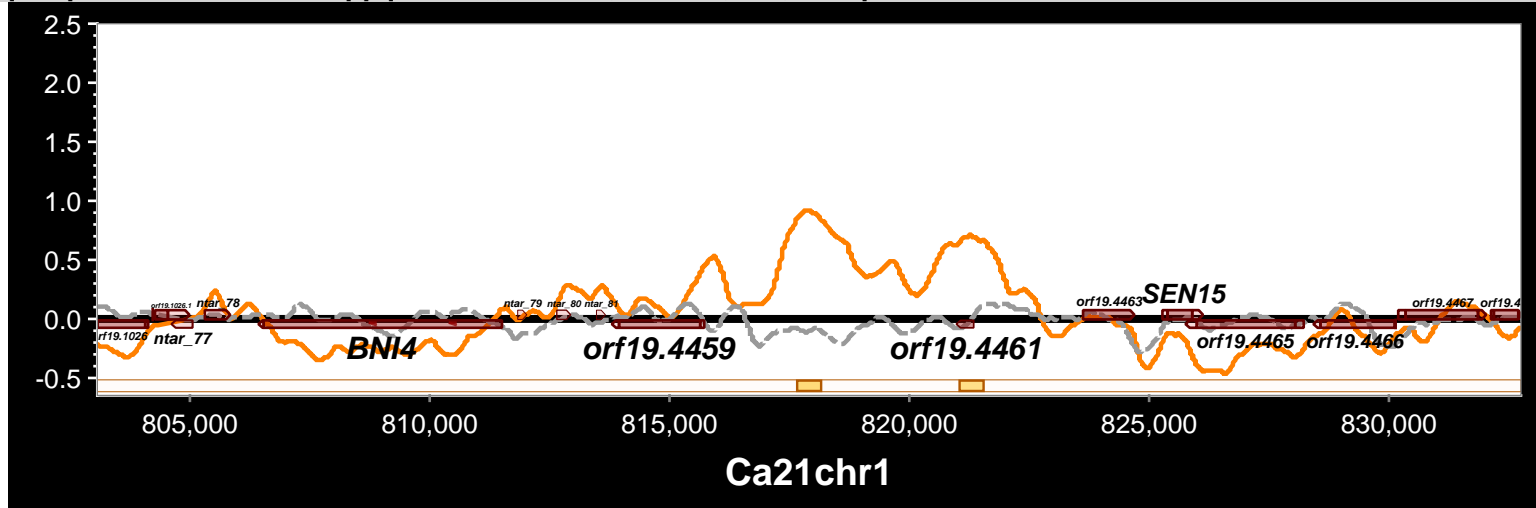

[0.916] Ca21chr6:732584-762267 [+] [orf19.5717, SAP4, orf19.5718, SAP1, orf19.5719]

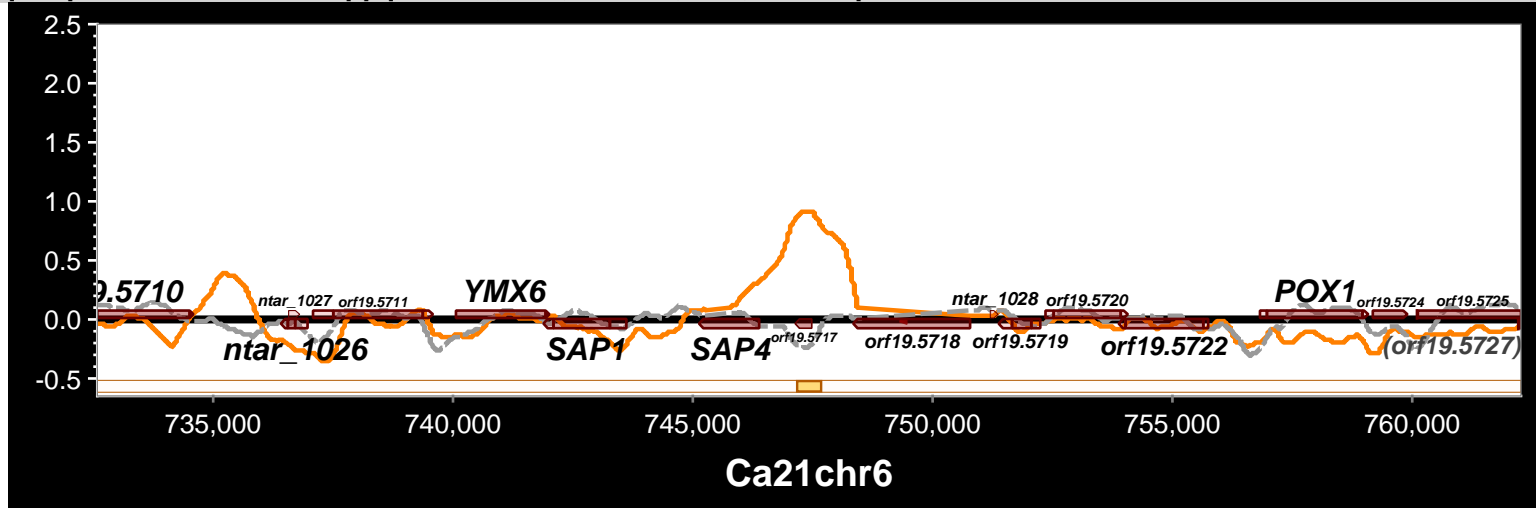

[0.914] Ca21chr1:285876-315559 [+] [orf19.3338, orf19.3337, SOD2, orf19.3341, orf19.3342]

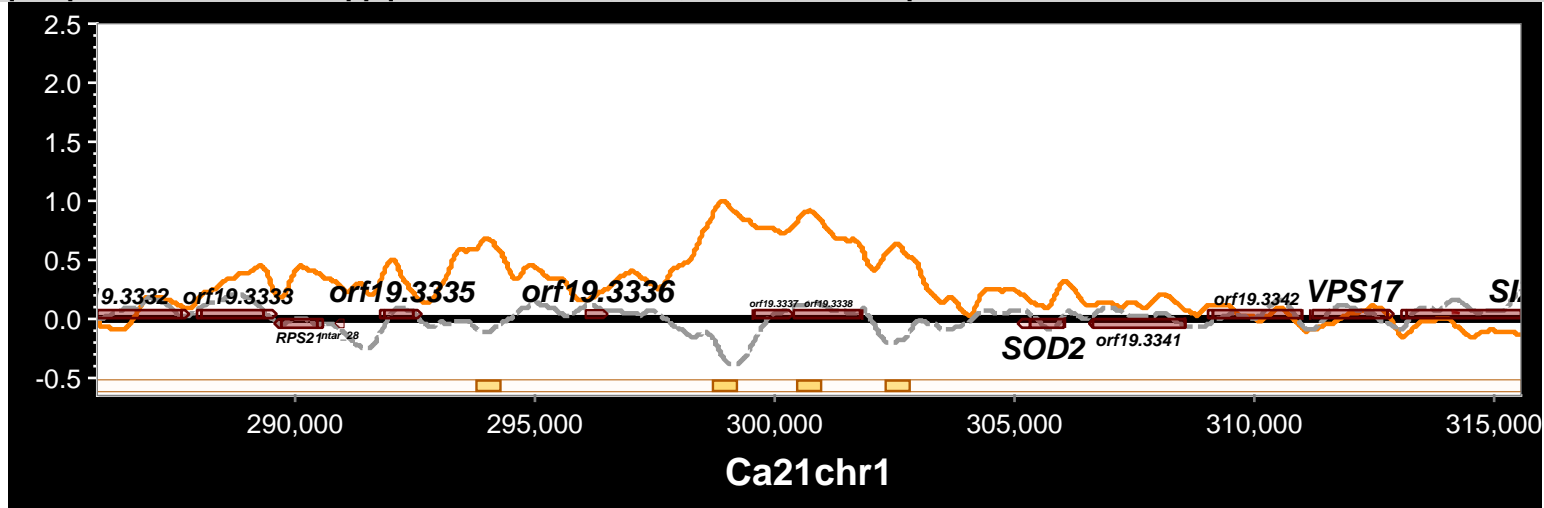

[0.911] Ca21chr3:193382-223065 [+] [orf19.2506, orf19.2505, ARP9, BMS1, orf19.2503]

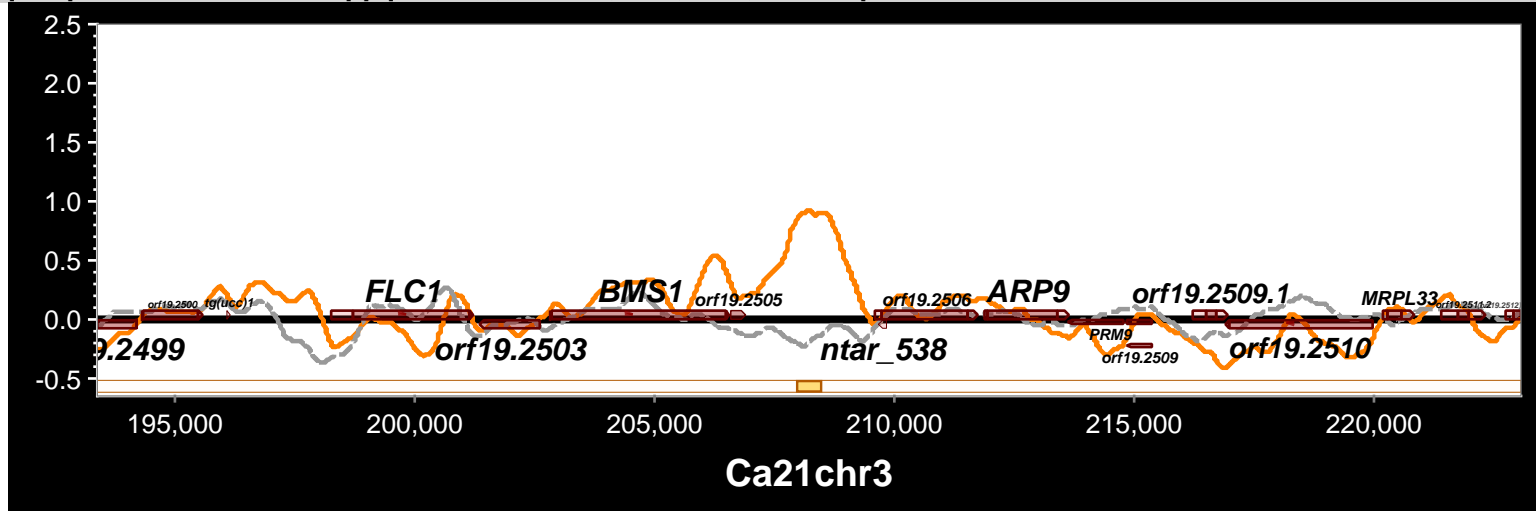

[0.911] Ca21chr5:1036349-1066032 [+] [orf19.3968, orf19.3969, orf19.3970, orf19.3971, orf19.3972]

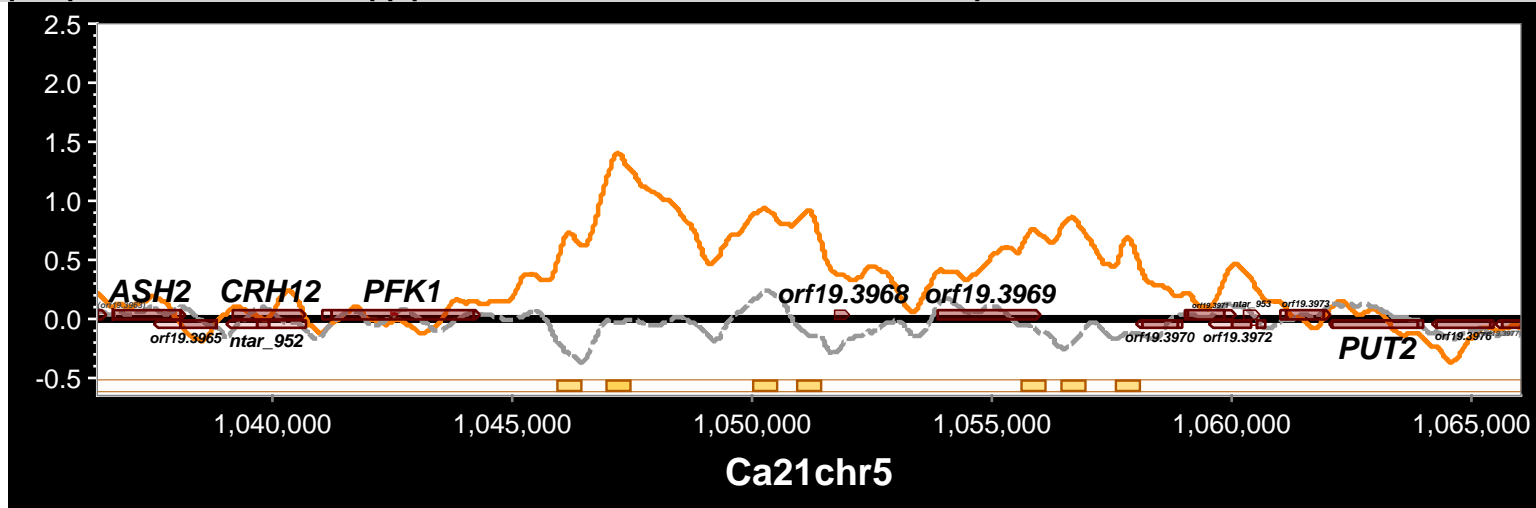

[0.901] Ca21chrR:1875544-1905227 [+] [RDN18, RDN5, RDN58, RDN25, TAR1]

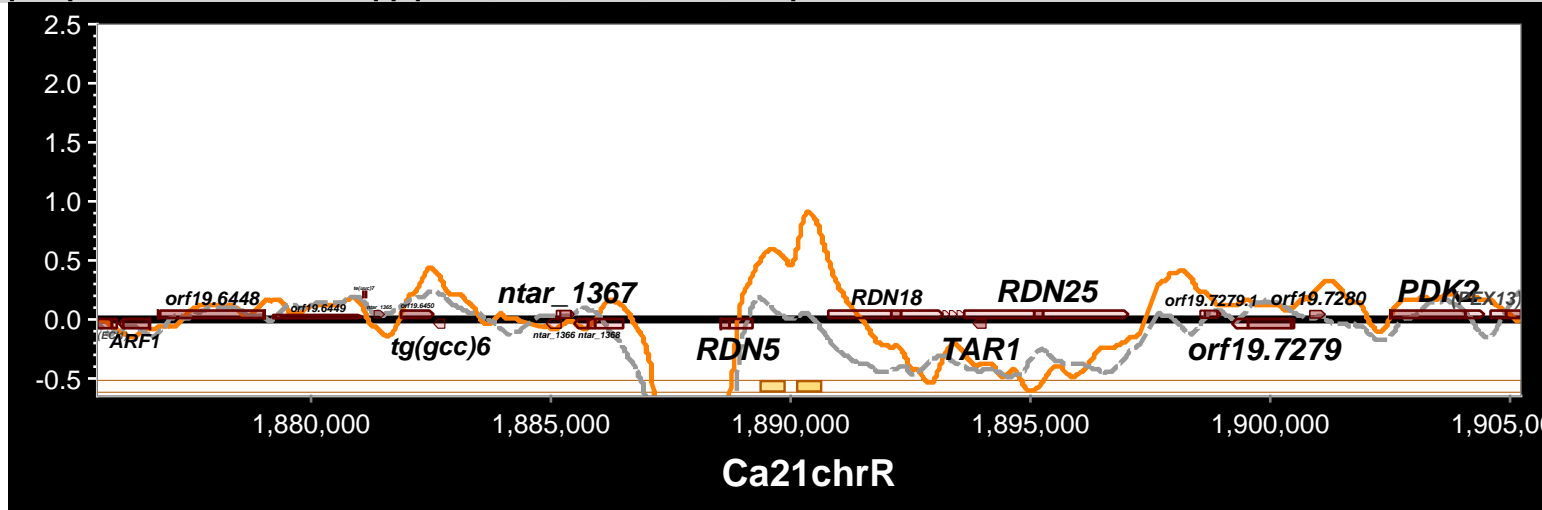

[0.9] Ca21chr1:2210389-2240072 [+] [orf19.4883, WOR1, orf19.4882, orf19.4880, MIR1]

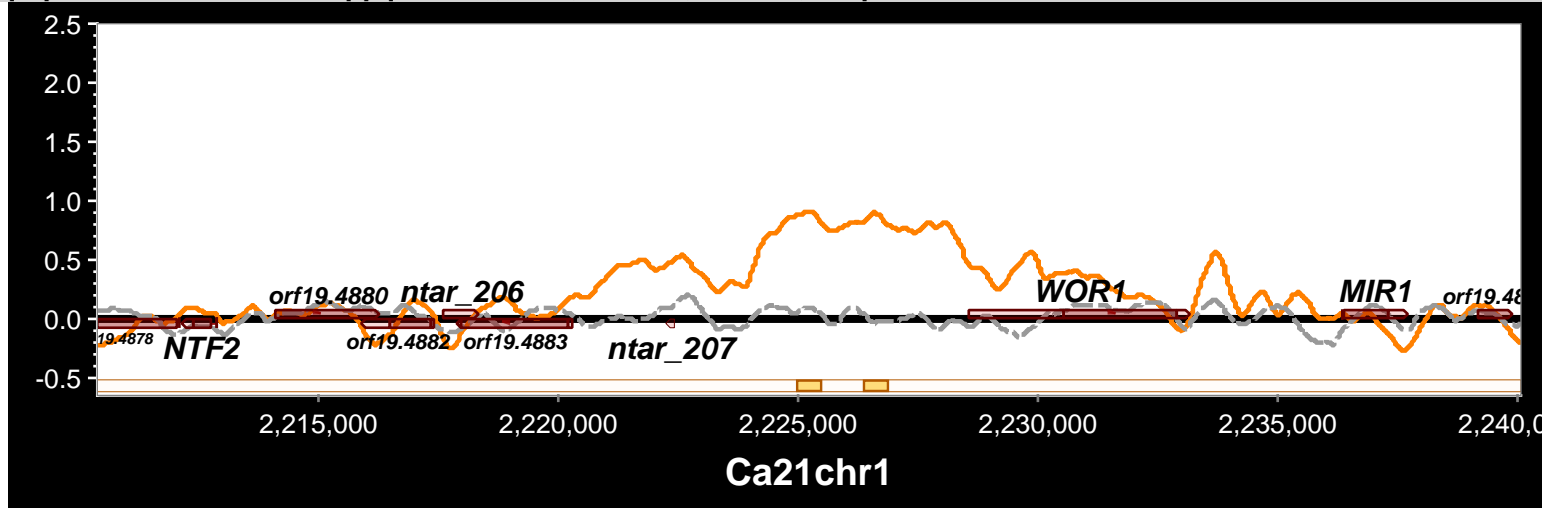





[0.893] Ca21chr4:456207-485890 [+] [PGA59, AMS1, orf19.2769, orf19.2770, orf19.2766]

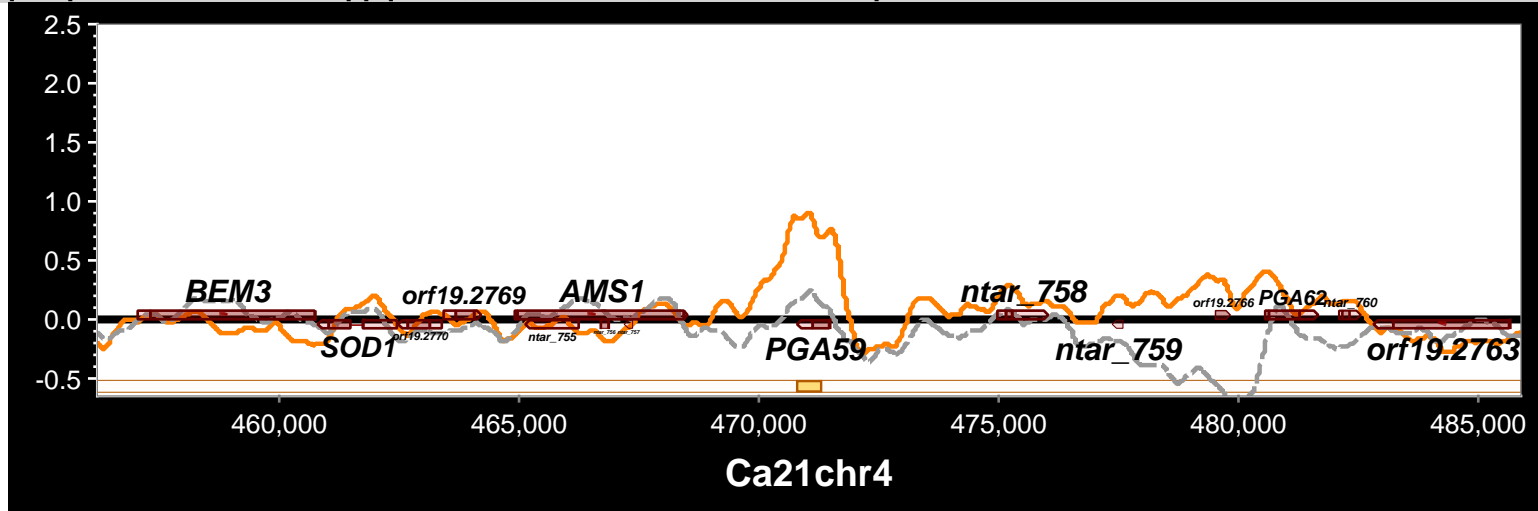

[0.888] Ca21chr1:997627-1027310 [+] [SAP7, MRPL37, YBN5, orf19.757, orf19.757.1]

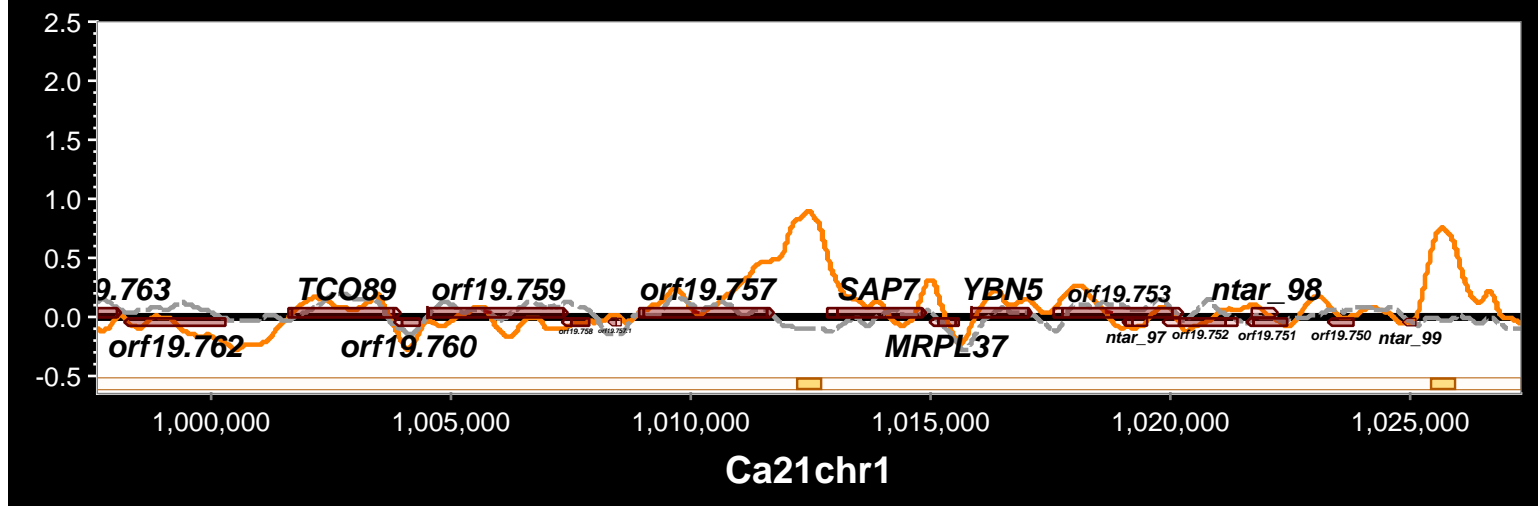

[0.887] Ca21chr5:223067-252750 [+] [orf19.1961, orf19.1963, CLN3, orf19.1964, BUD23]

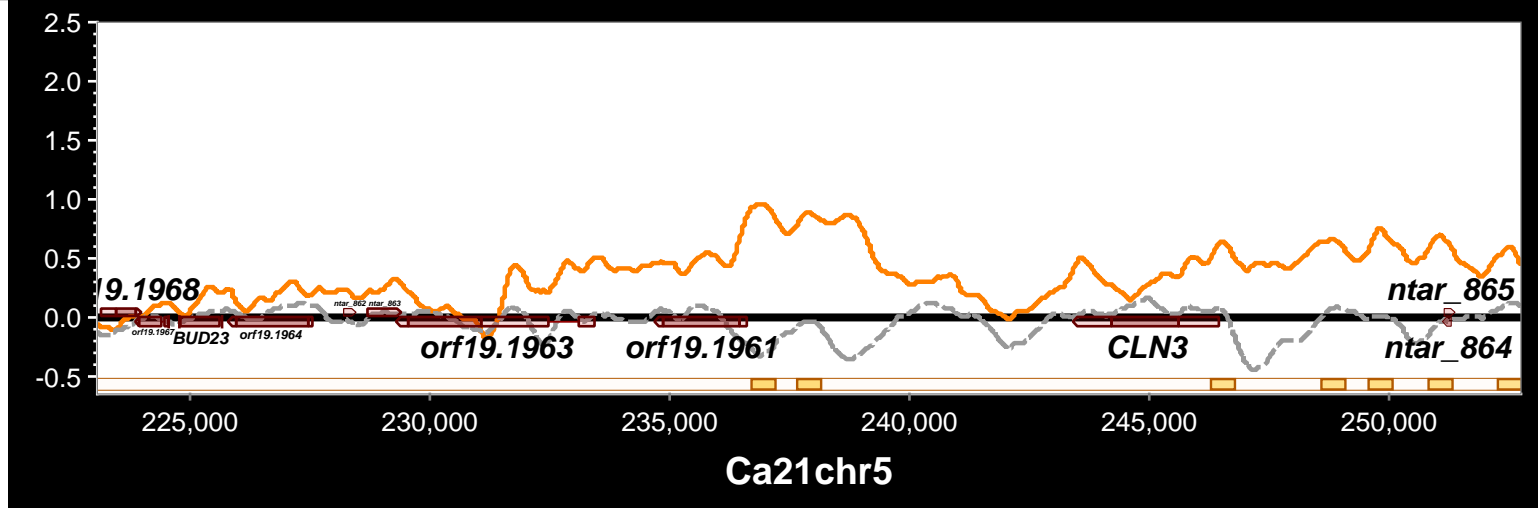

[0.886] Ca21chr5:640161-669844 [+] [orf19.4321, MIG1, DAP2, GRE3, orf19.4323]

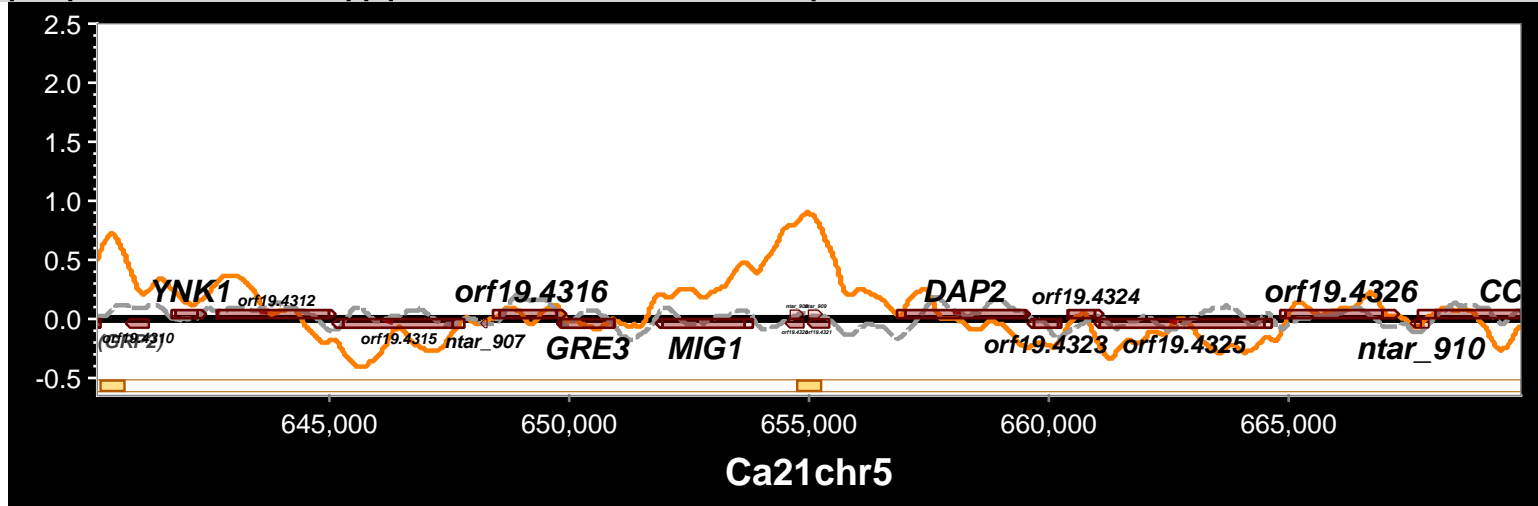

[0.884] Ca21chr3:923197-952880 [+] [RAX1, RAS2, RPL19A, orf19.5905, PKC1]

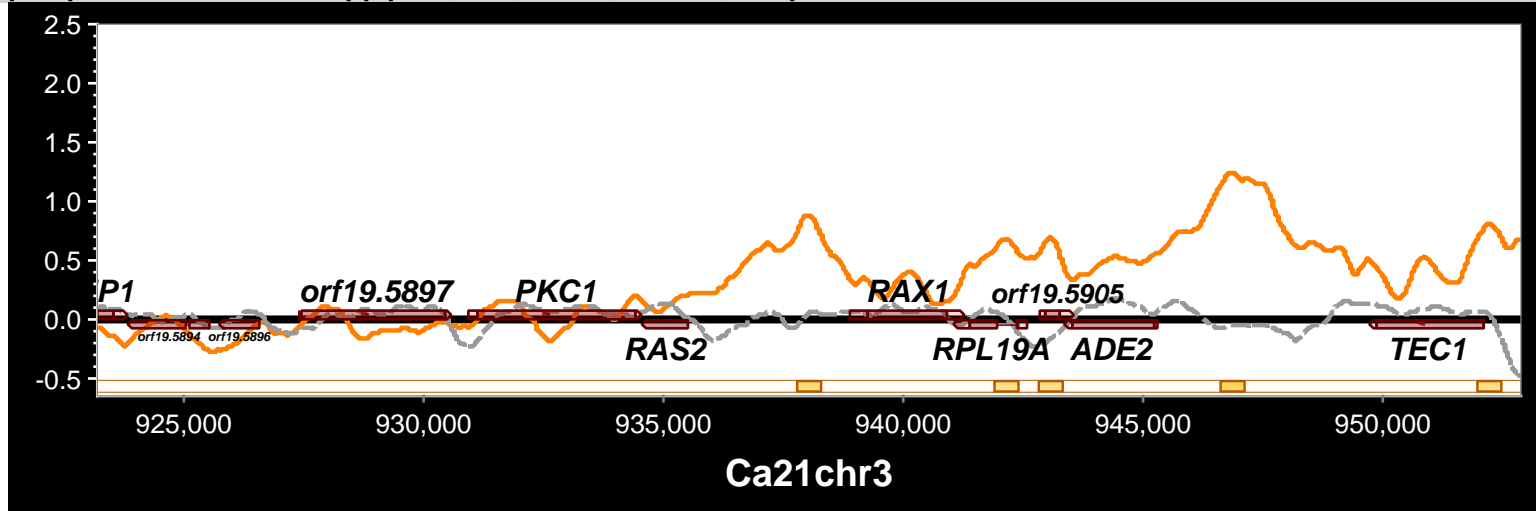

[0.883] Ca21chr1:424276-453959 [+] [HGT2, SHA3, orf19.3667, orf19.3666, orf19.3665]

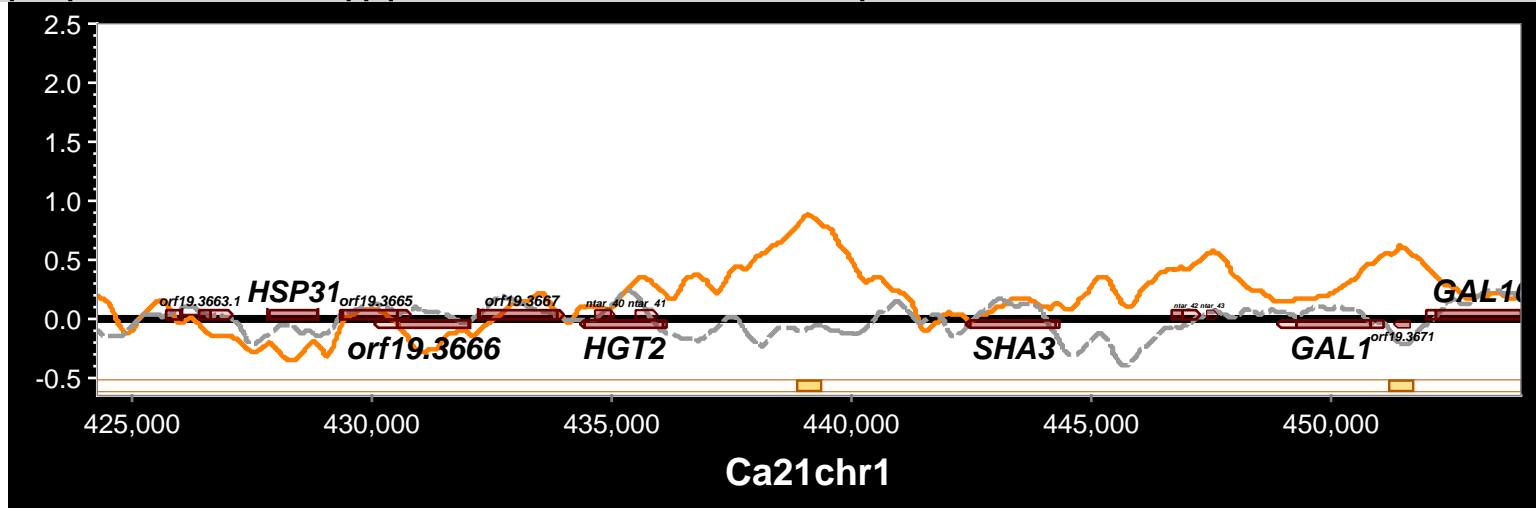

[0.883] Ca21chr1:2857104-2886787 [+] [orf19.4942, TYE7, PSA2, orf19.4940, orf19.4939]

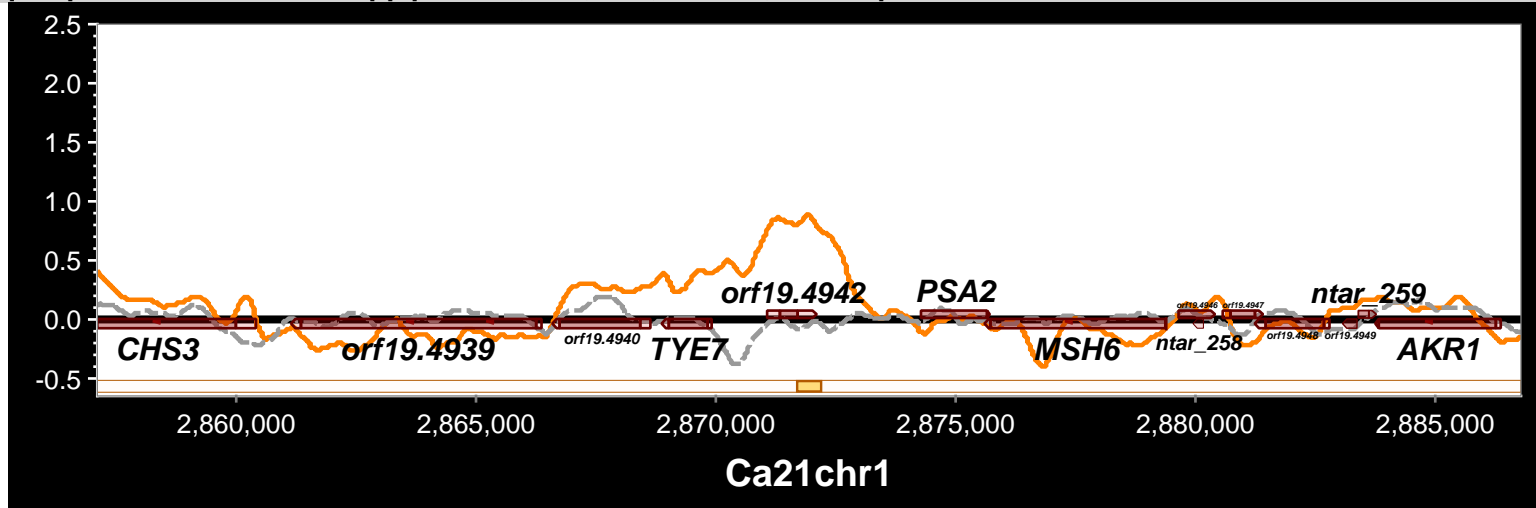

[0.879] Ca21chr1:1065999-1095682 [+] [GAT2, orf19.450, orf19.4057, orf19.4059, ARO4]

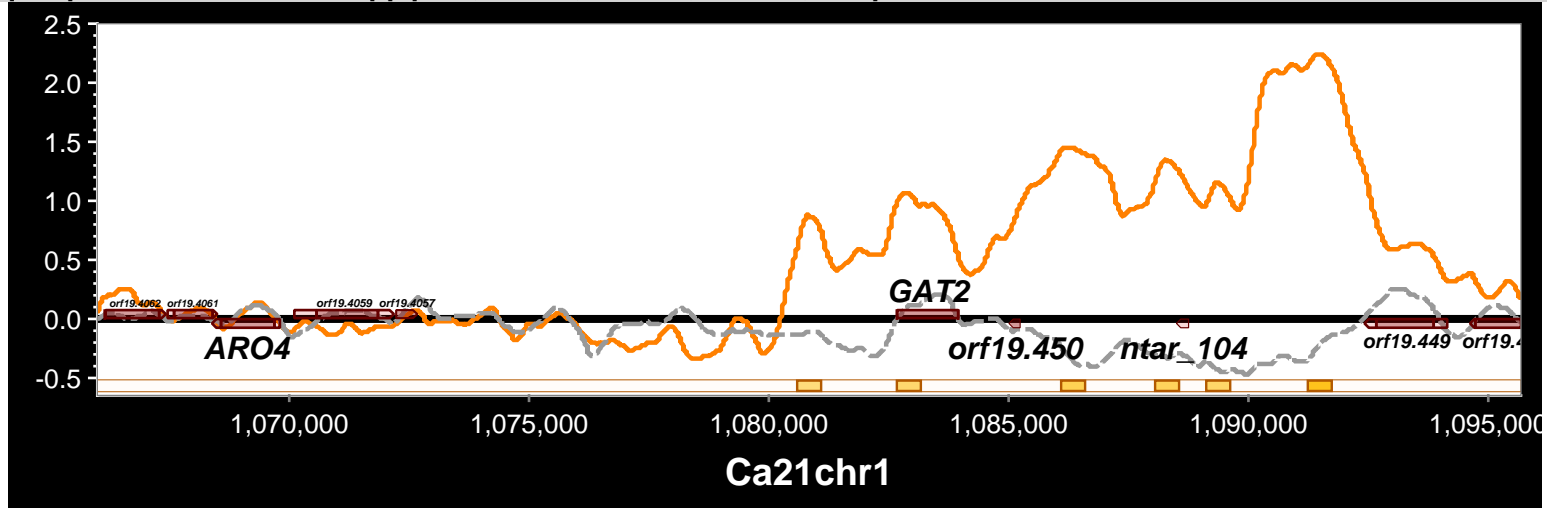

[0.879] Ca21chr4:1293541-1323224 [+] [orf19.1277, orf19.1276, VPS11, GAT1, PGA49]

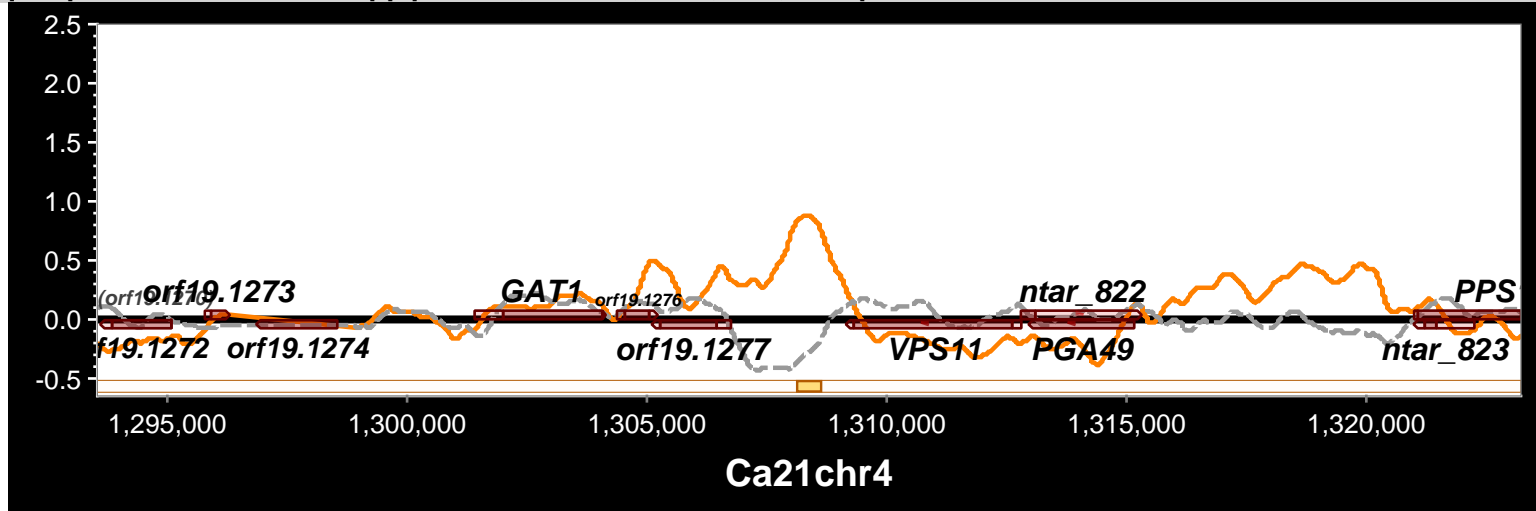

[0.864] Ca21chr3:1205107-1234790 [+] [orf19.6983, orf19.6984, orf19.6982, TEA1, orf19.6981]

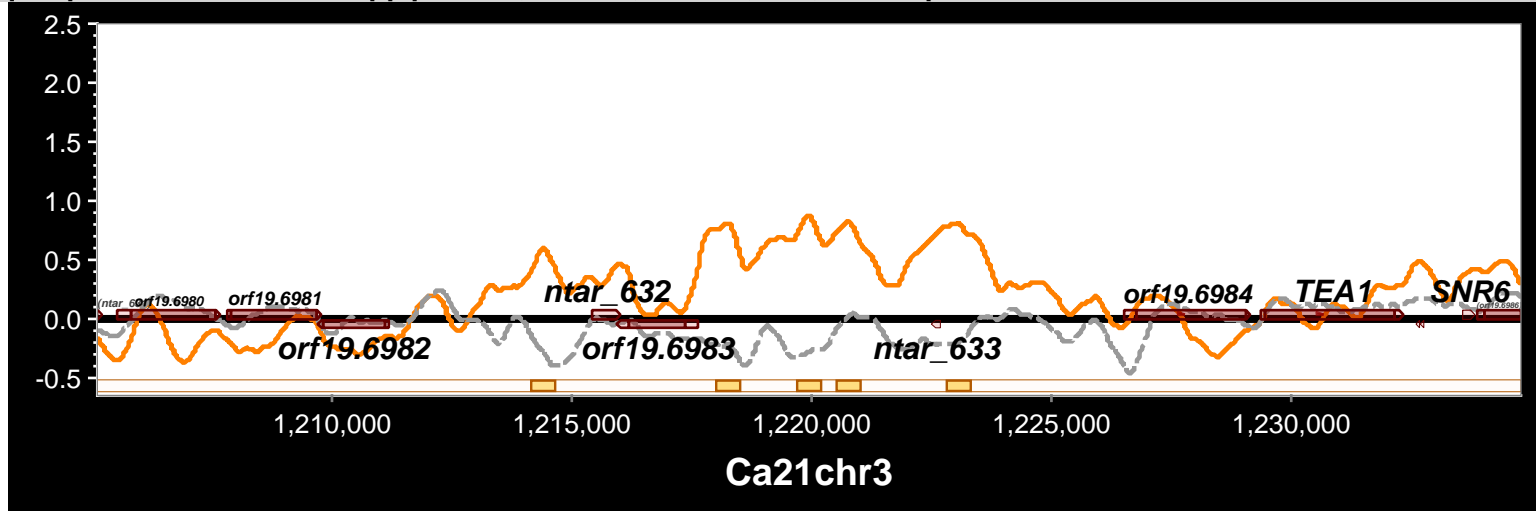

[0.862] Ca21chr3:1101356-1131039 [+] [WOR2, orf19.5991, RHB1, orf19.5989, MCA1]

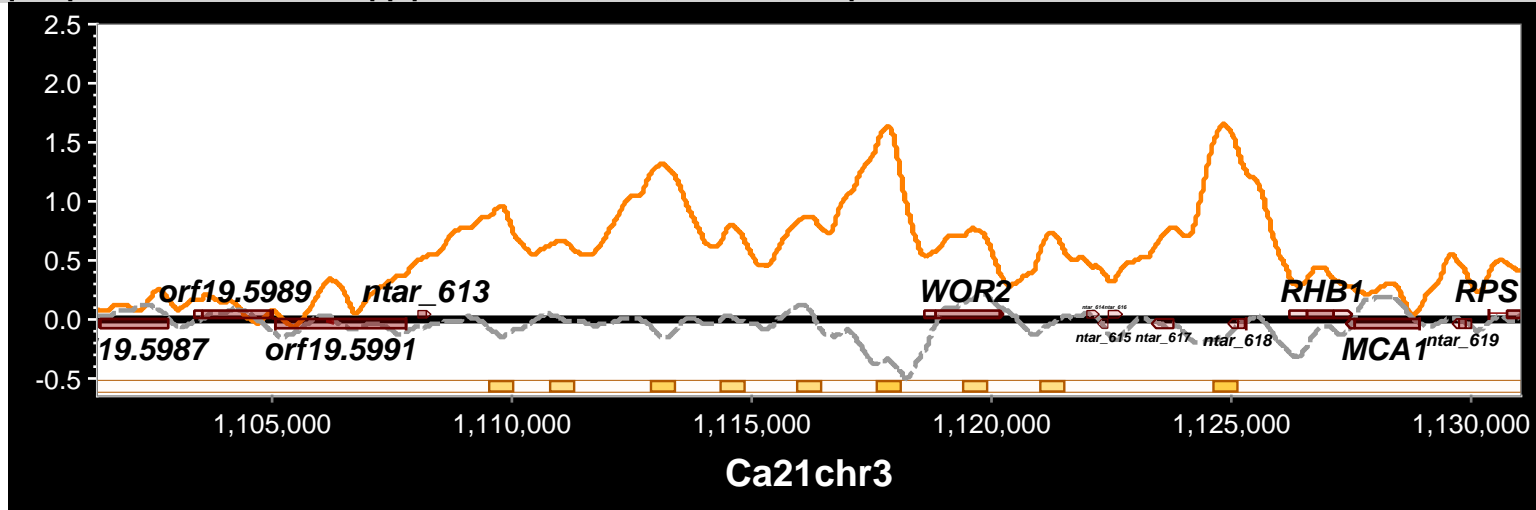

[0.861] Ca21chr5:1041860-1071543 [+] [orf19.3970, orf19.3971, orf19.3969, orf19.3972, orf19.3973]

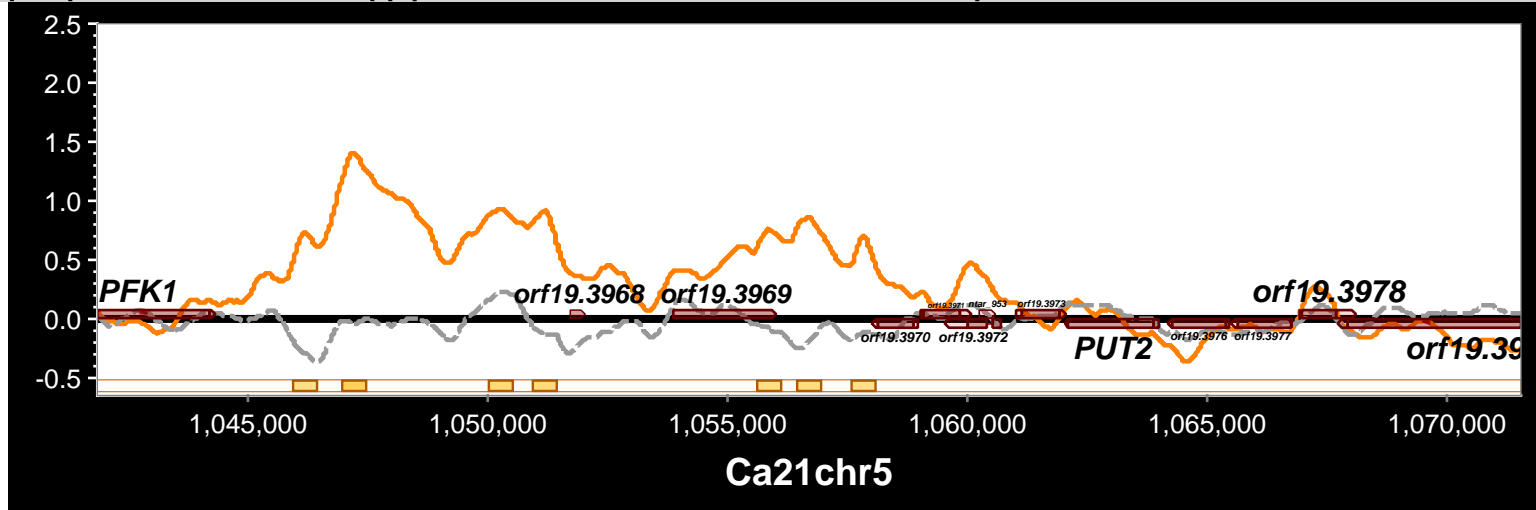

[0.861] Ca21chrR:1176140-1205823 [+] [tC(GCA)2, tC(GCA)1, orf19.5844, RNR3, orf19.5843]

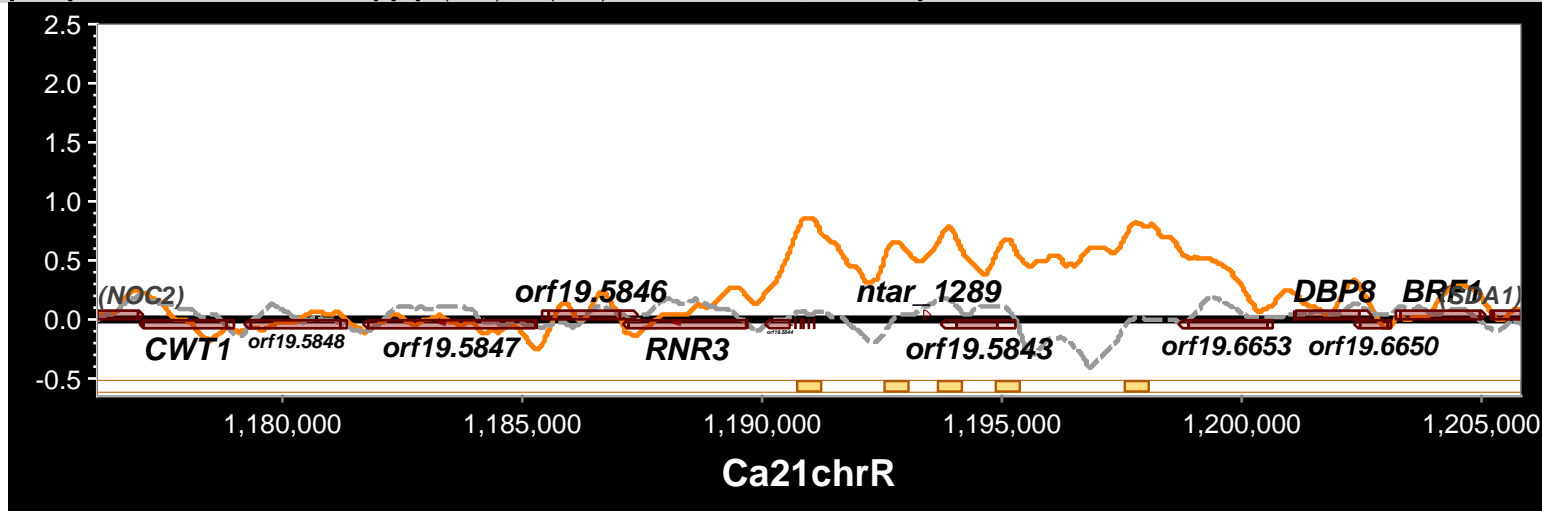

[0.857] Ca21chrR:591593-621276 [+] [orf19.2825, RFG1, orf19.2826, orf19.2827, orf19.2828]

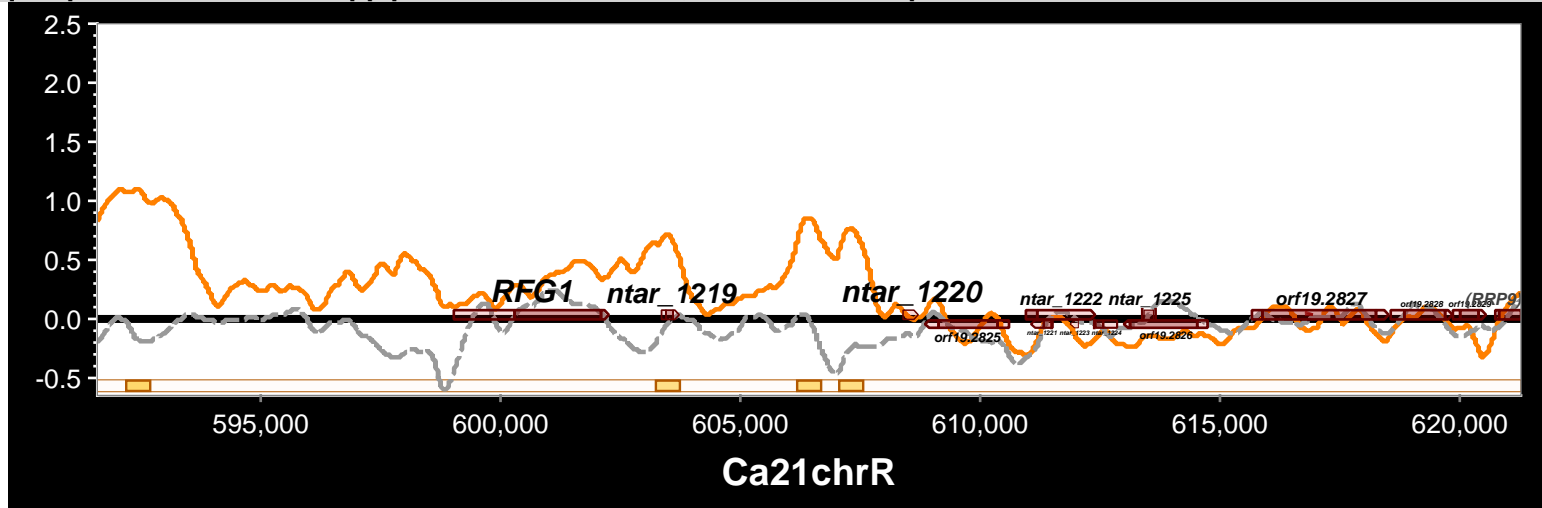

[0.852] Ca21chr3:1551501-1581184 [+] [FCR1, tw(CCA)2, orf19.6818, orf19.6816, TDH3]

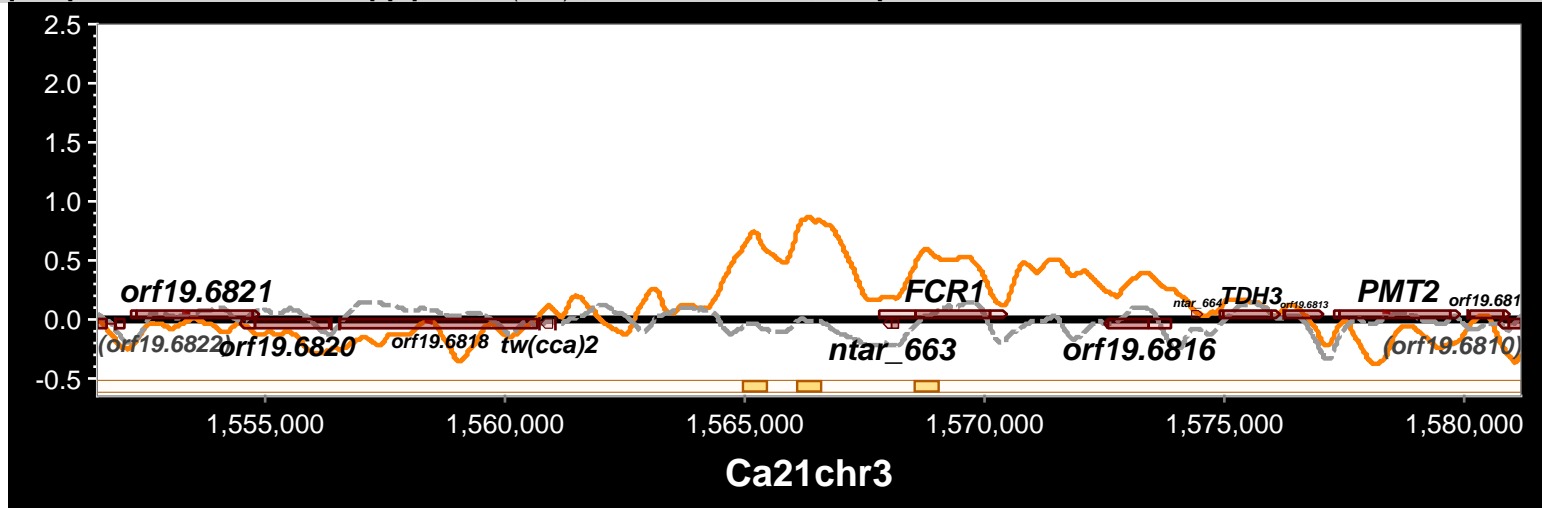

[0.85] Ca21chr1:1316886-1346569 [+] [orf19.177, orf19.1821, orf19.6280, orf19.6277, UME6]

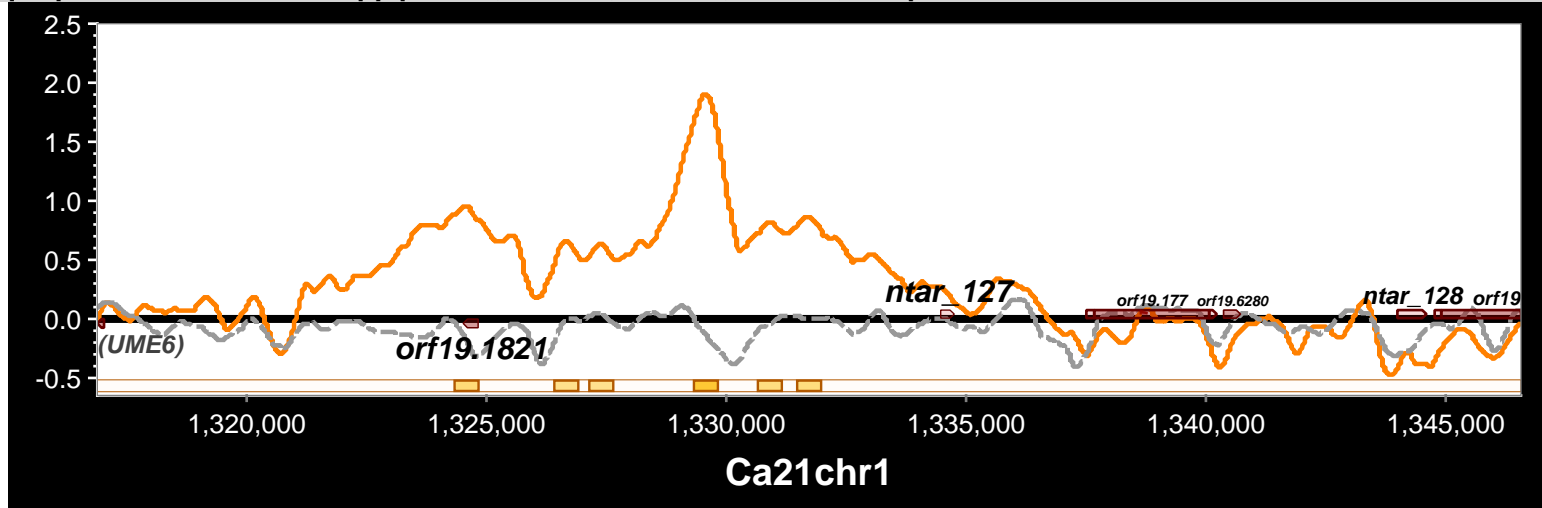

[0.835] Ca21chr4:841541-871224 [+] [orf19.5311, orf19.5312, orf19.5308, orf19.1208, JEN2]

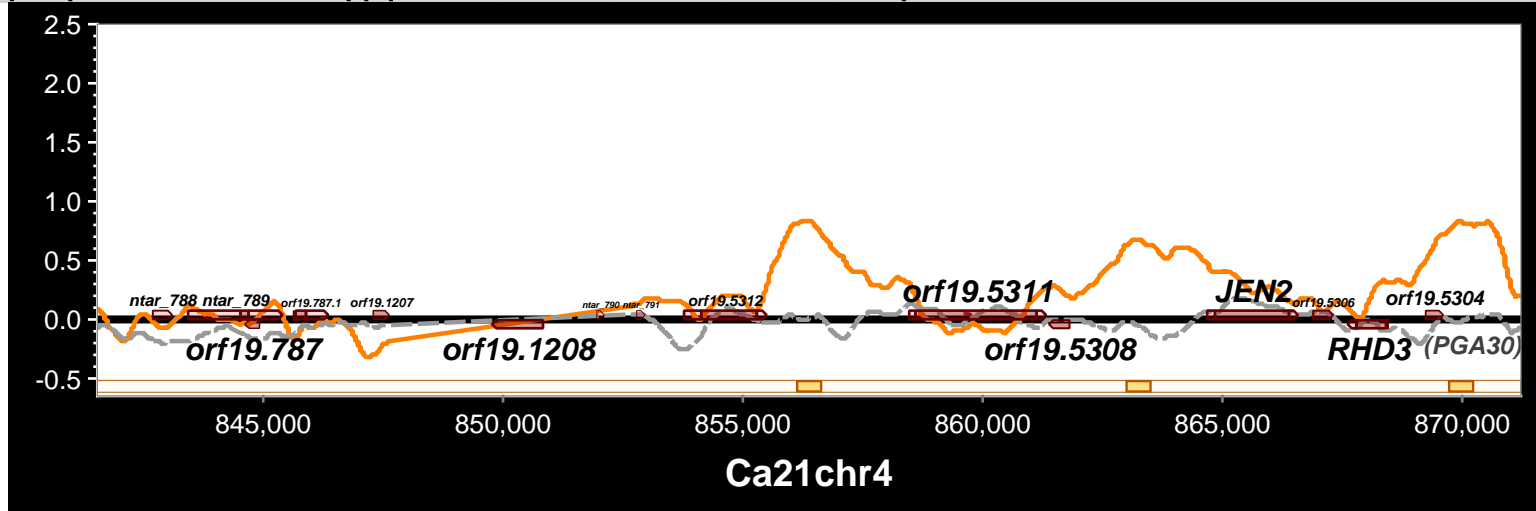

[0.832] Ca21chr6:27822-57505 [+] [orf19.1189, orf19.1190, orf19.1191, CPH2, DNA2]

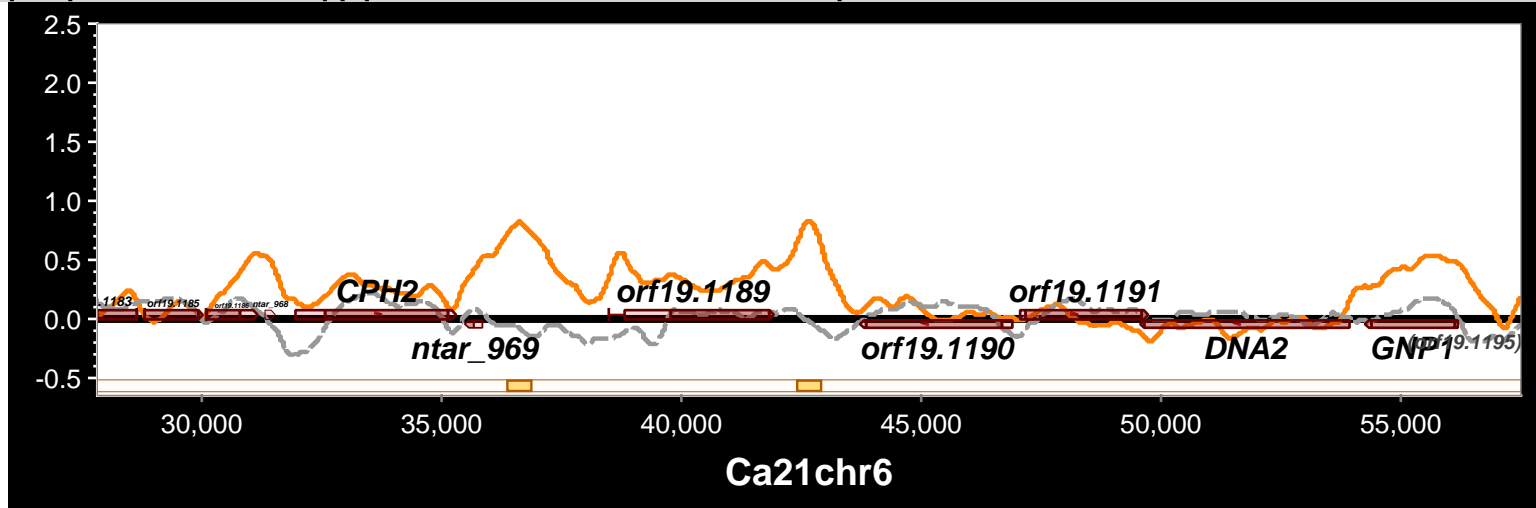

[0.83] Ca21chr2:719322-749005 [+] [orf19.871, orf19.872, ADAEC, orf19.873, COX6]

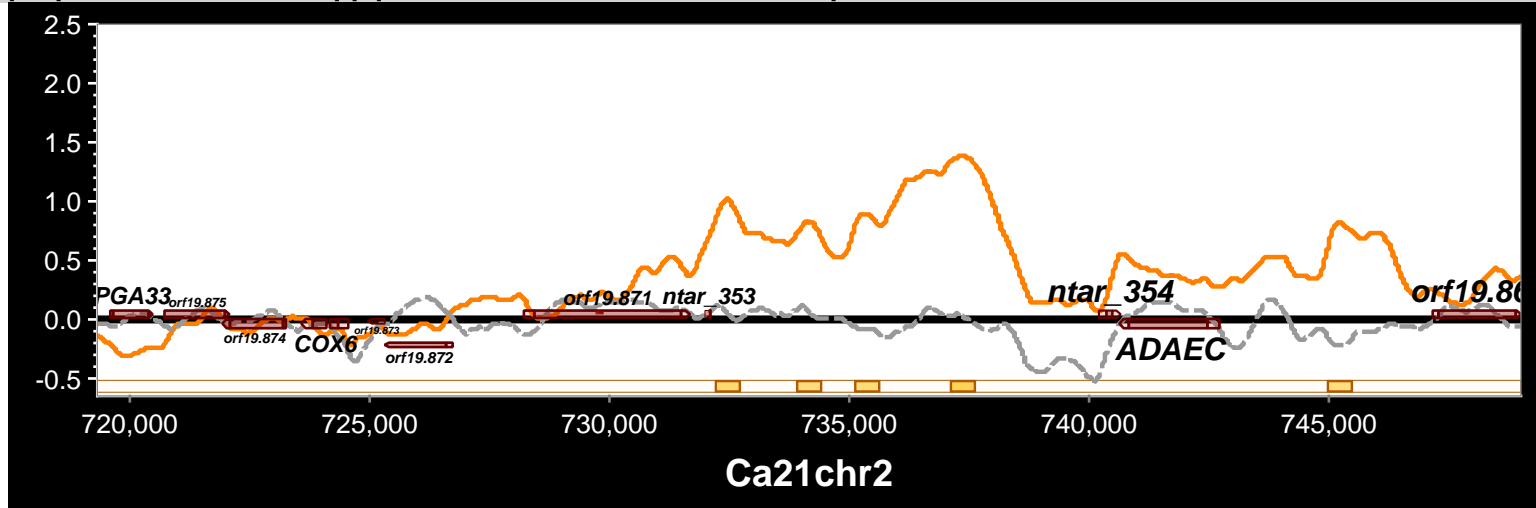

[0.83] Ca21chr4:855135-884818 [+] [orf19.5304, RHD3, PGA30, JEN2, PGA31]

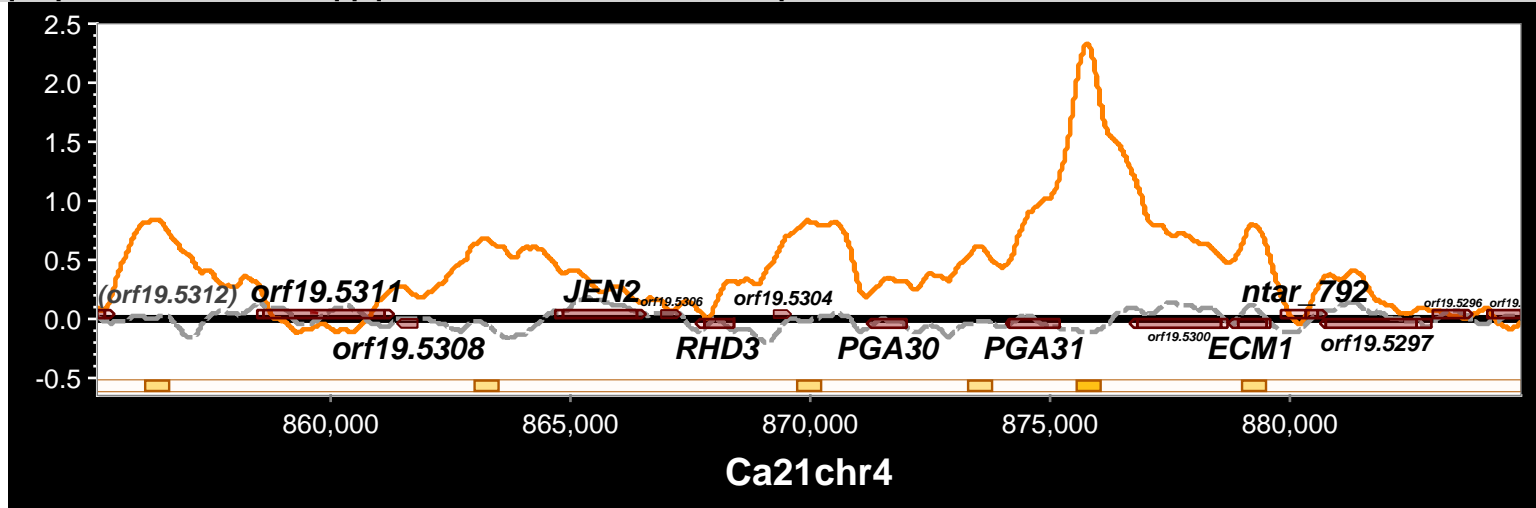

[0.83] Ca21chr5:264809-294492 [+] [GPR1, AUR1, orf19.1943, orf19.1946, orf19.1948]

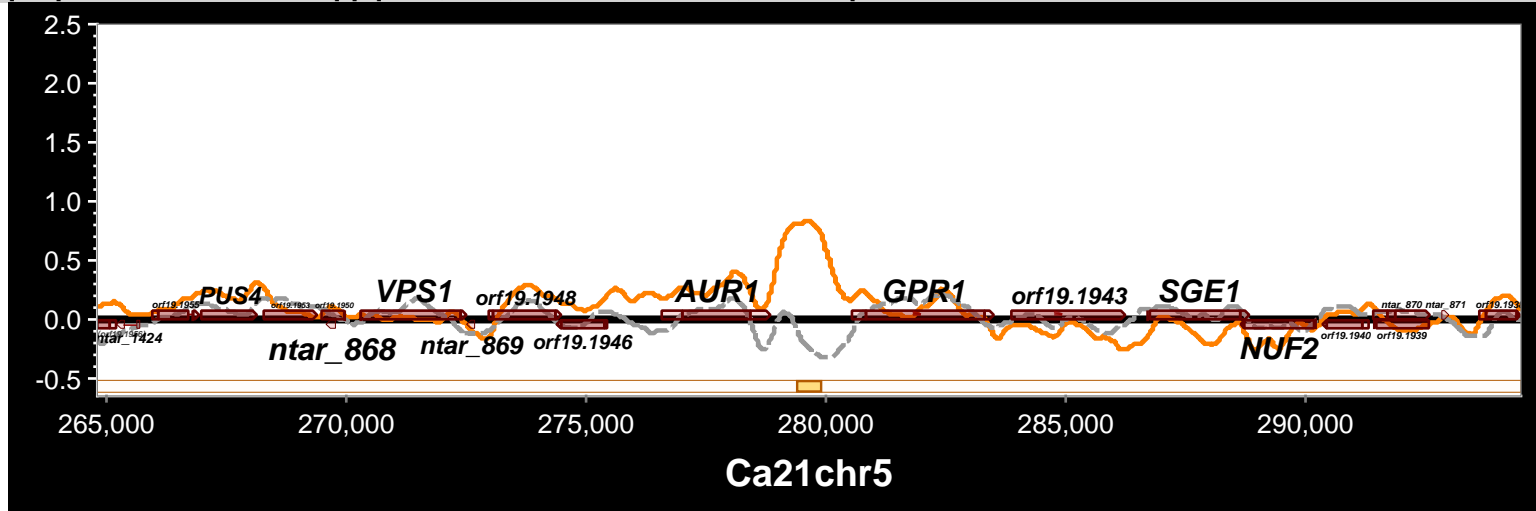

[0.825] Ca21chrR:1254812-1284495 [+] [SOK1, orf19.3848, orf19.3851, SFL1, orf19.3852]

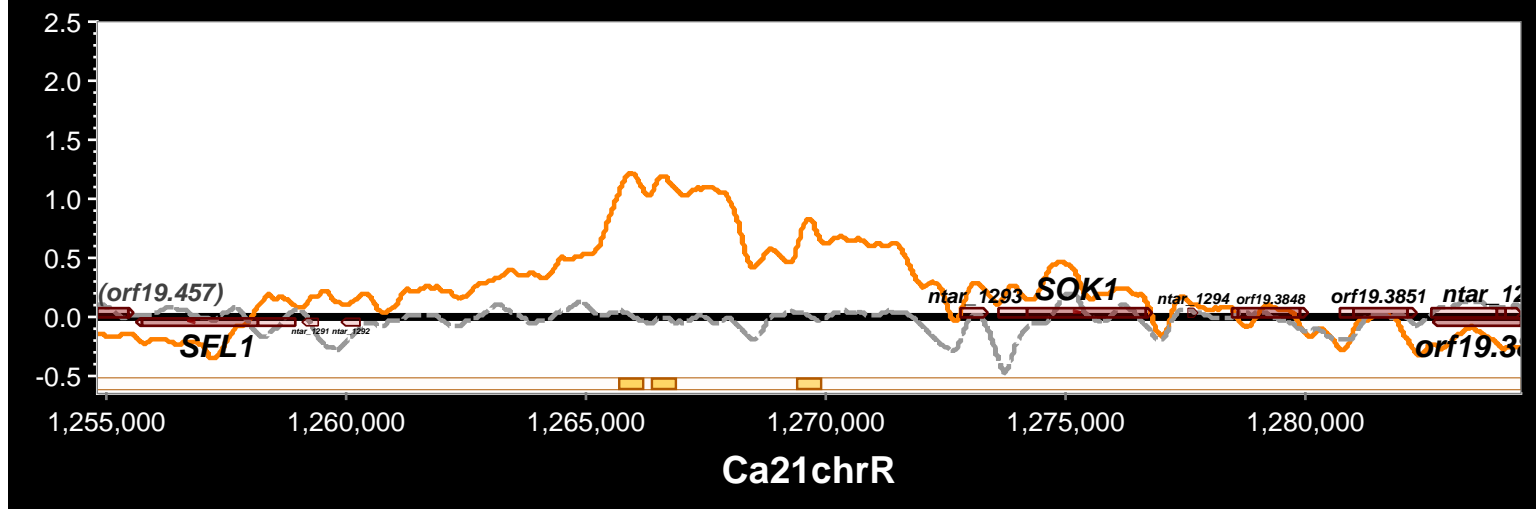

[0.824] Ca21chr2:1727545-1757228 [+] [orf19.3621, YWP1, ANP1, orf19.3617, ERG9]

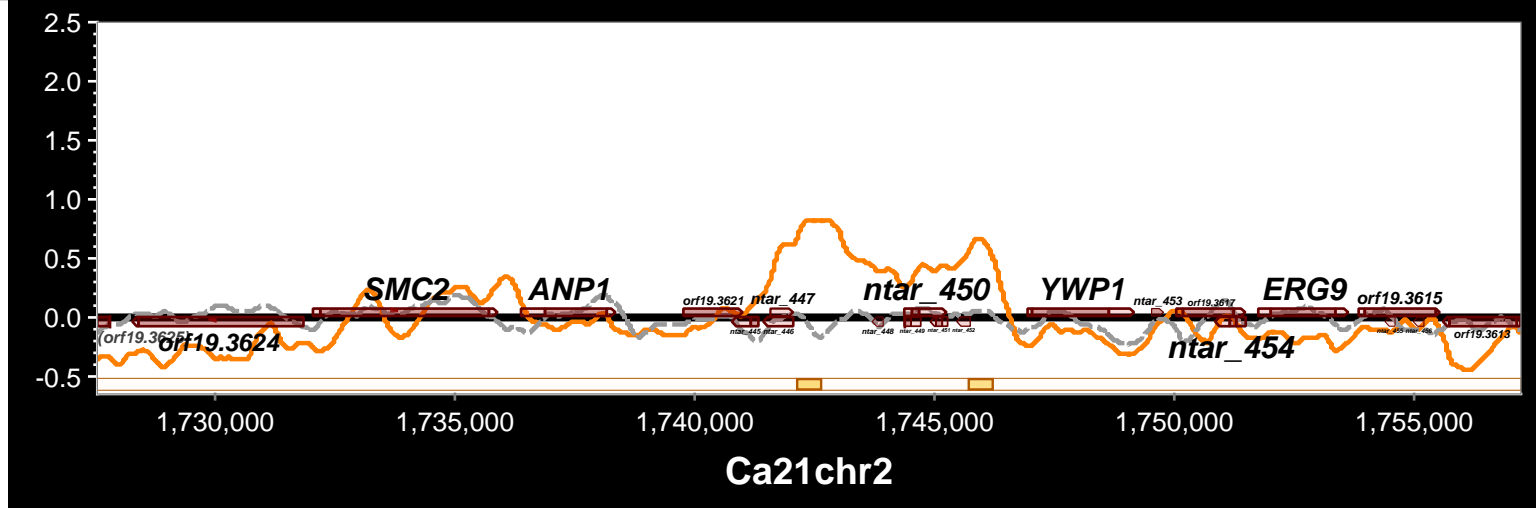

[0.823] Ca21chrR:1182971-1212654 [+] [orf19.6653, orf19.5843, DBP8, orf19.6650, BRF1]

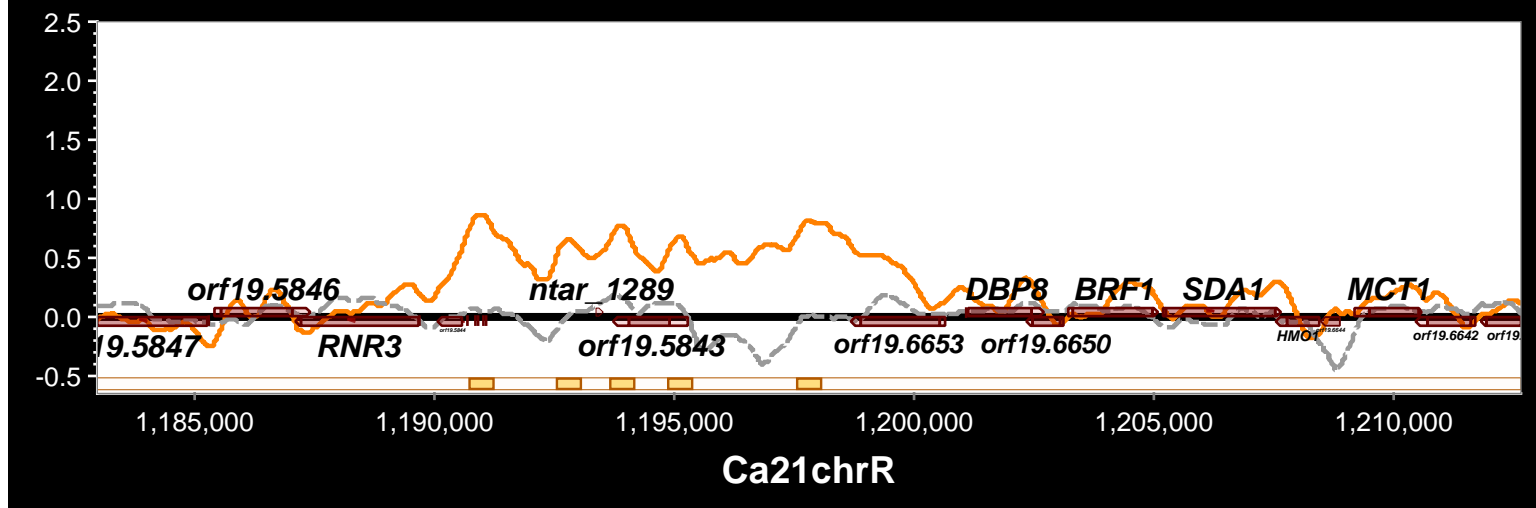

[0.82] Ca21chr3:1205930-1235613 [+] [orf19.6983, orf19.6984, TEA1, orf19.6982, tV(AAC)5]

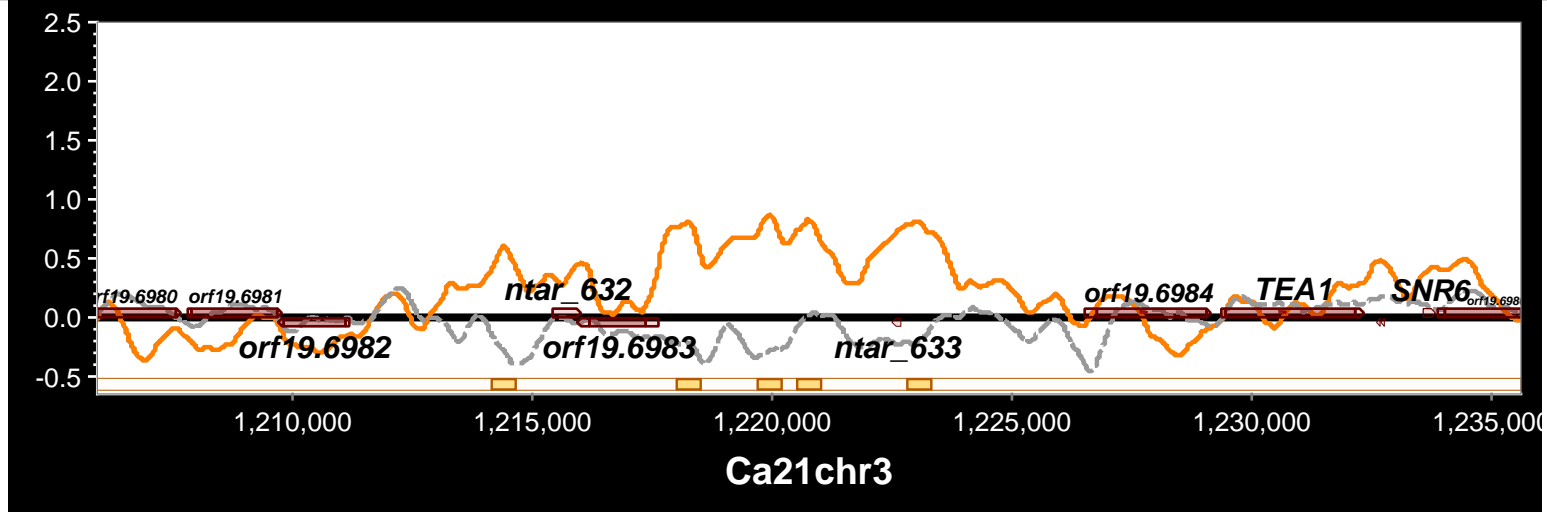

[0.819] Ca21chr1:1316067-1345750 [+] [orf19.1821, orf19.177, orf19.6280, UME6, orf19.6277]

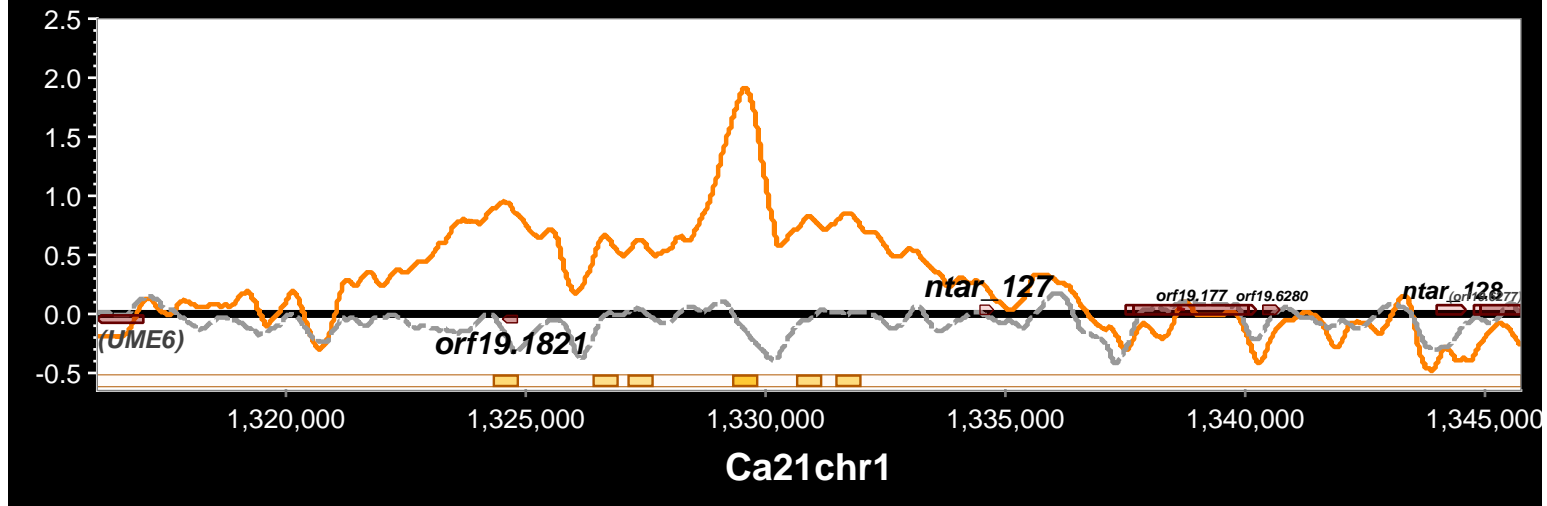

[0.816] Ca21chr3:1208227-1237910 [+] [orf19.6984, orf19.6983, TEA1, tV(AAC)5, tV(AAC)6]

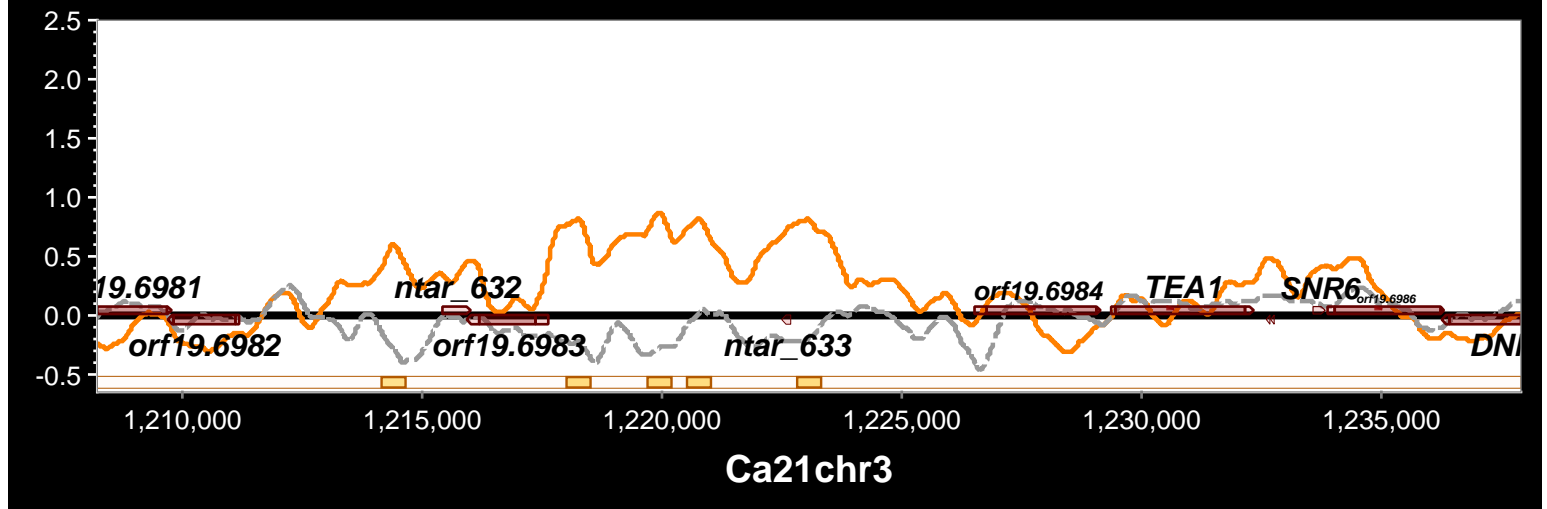

[0.813] Ca21chr2:730388-760071 [+] [orf19.867, ADAEC, RAD32, orf19.864, orf19.863]

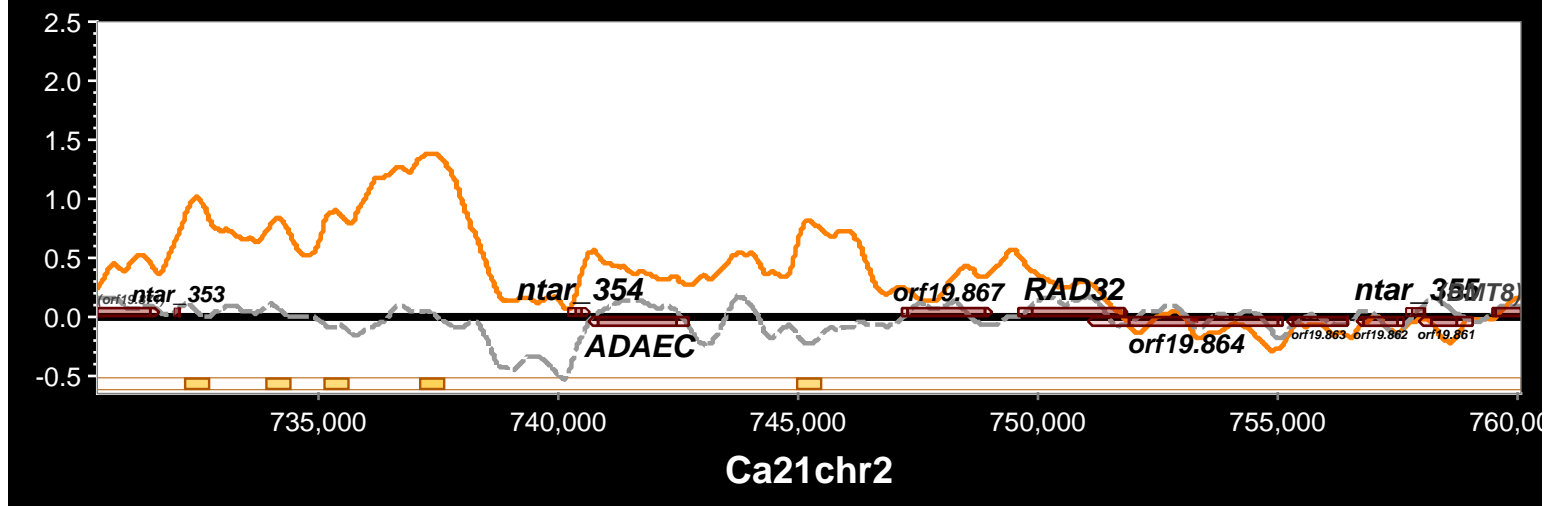

[0.811] Ca21chr1:2333533-2363216 [+] [orf19.1831, FCY23, orf19.1830, orf19.1833, orf19.1005]

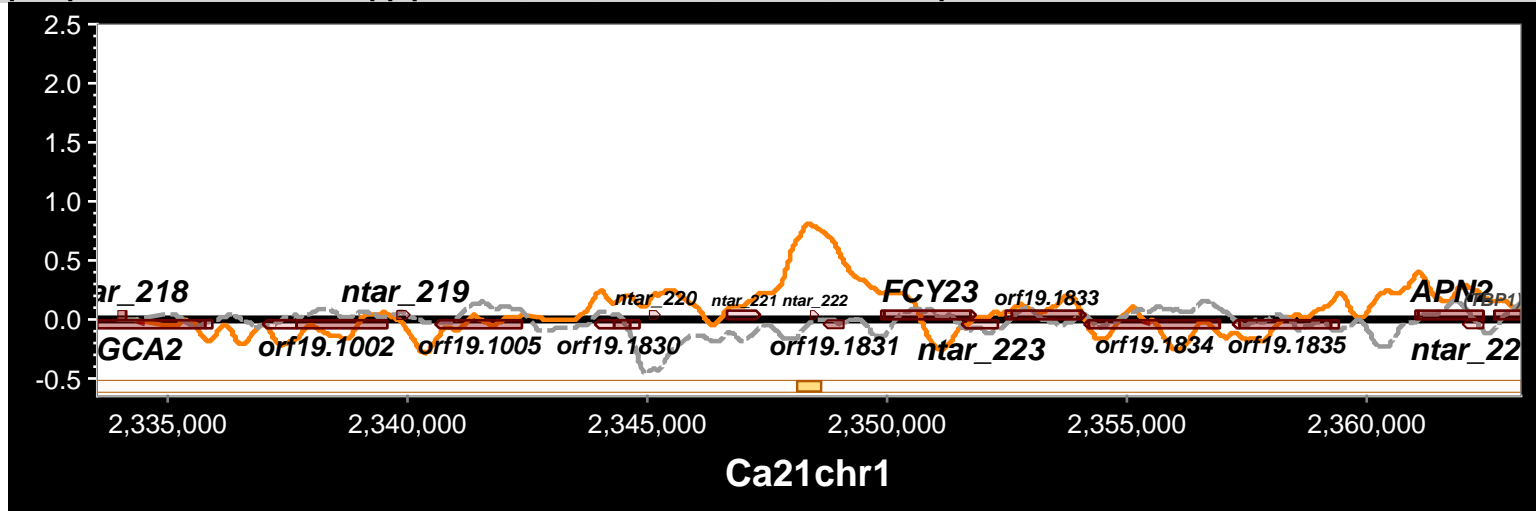

[0.811] Ca21chr6:21780-51463 [+] [orf19.1189, CPH2, orf19.1186, orf19.1185, orf19.1183]

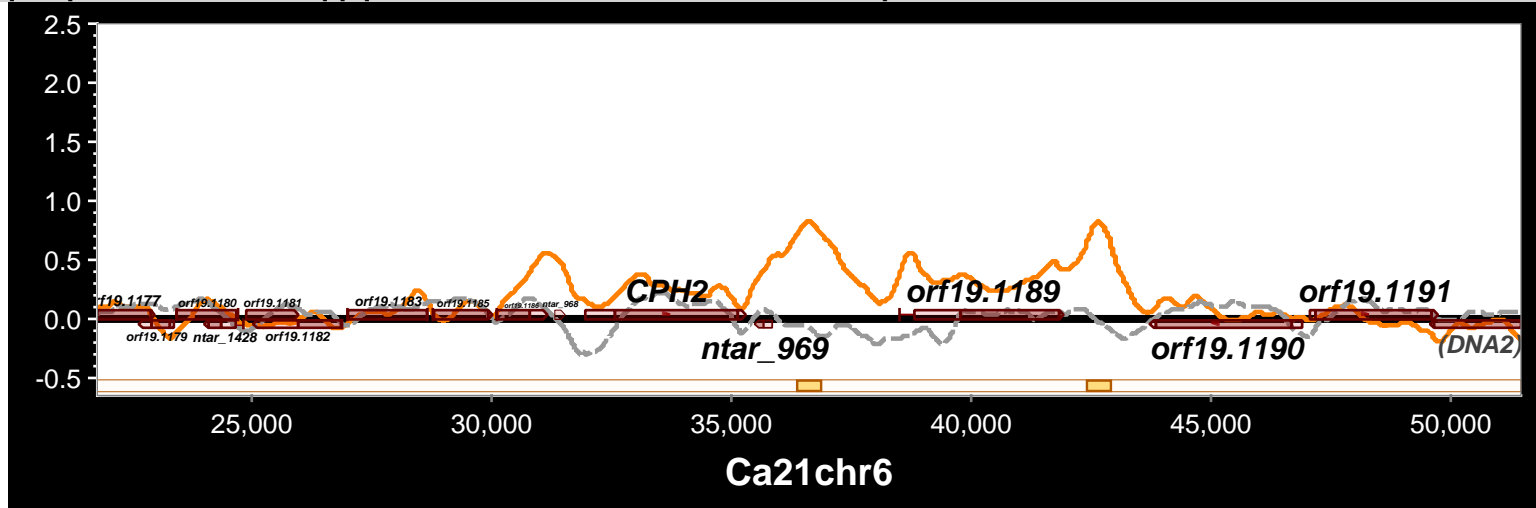

[0.81] Ca21chr3:1203419-1233102 [+] [orf19.6983, orf19.6982, orf19.6984, orf19.6981, TEA1]

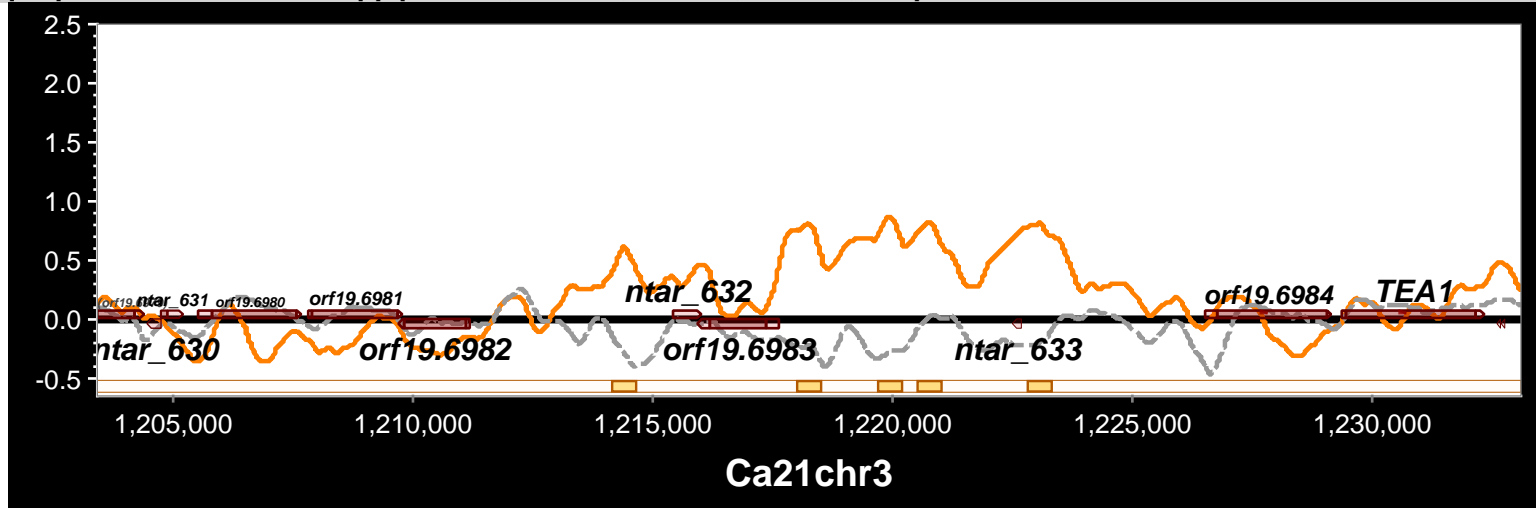

[0.809] Ca21chr4:549875-579558 [+] [orf19.2725, orf19.2726, GRX3, orf19.2724, orf19.2728]

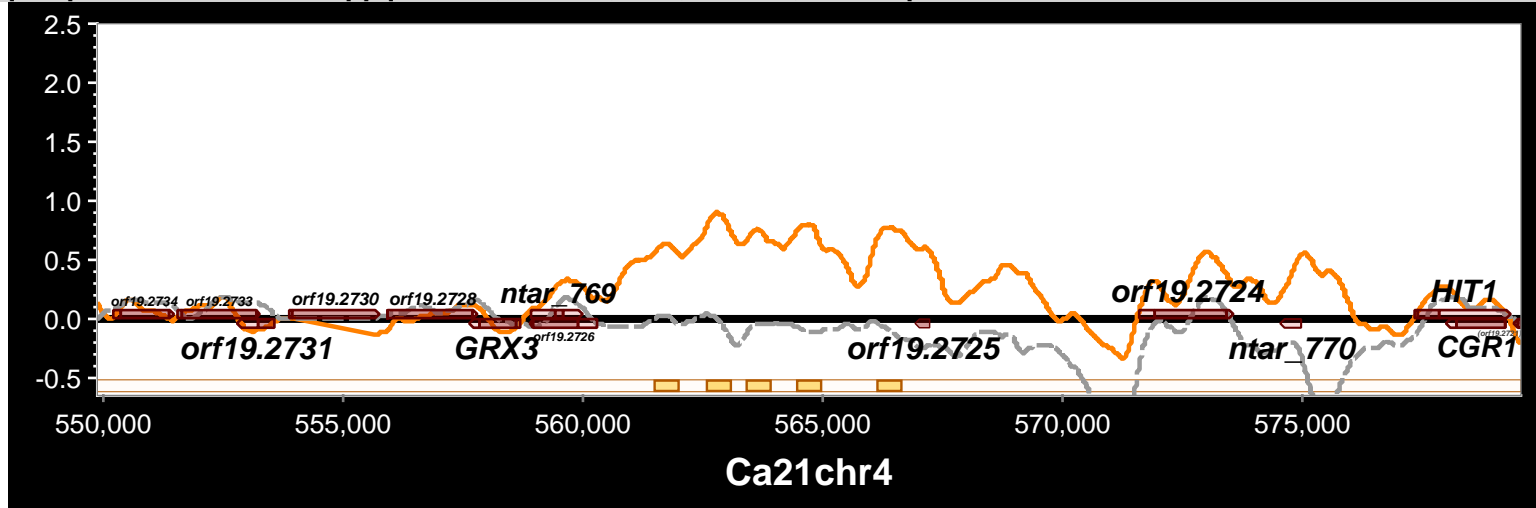



[0.807] Ca21chr3:937380-967063 [+] [TEC1, ADE2, orf19.5910, orf19.5905, CMK1]

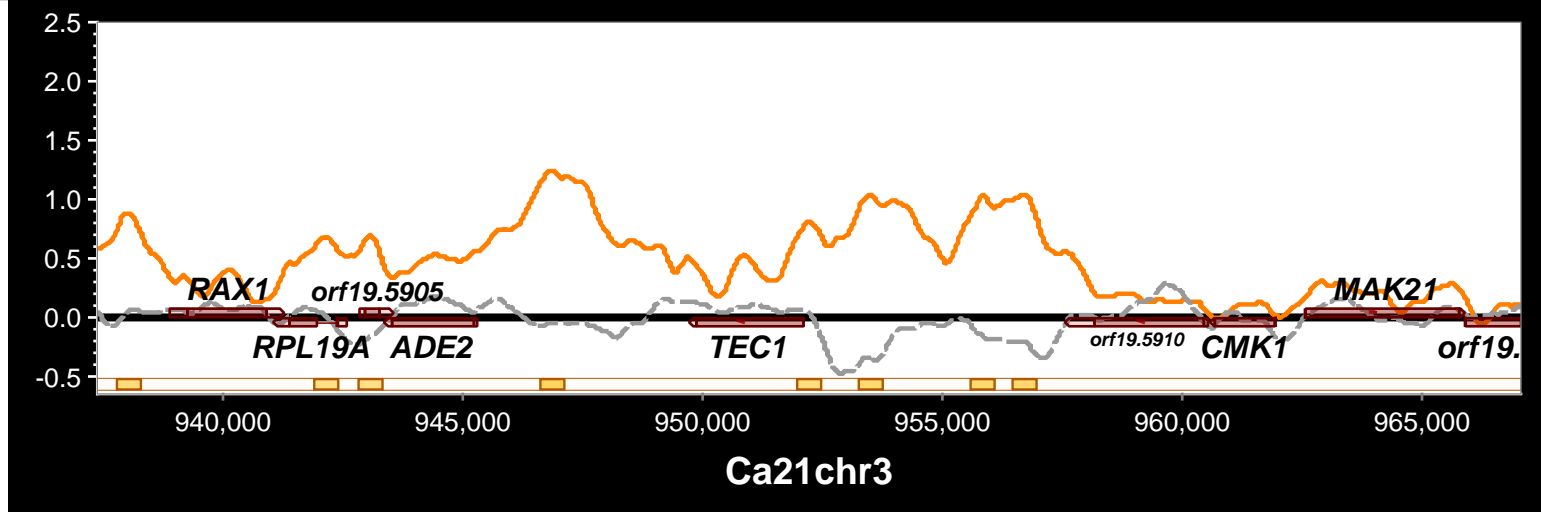

[0.803] Ca21chr6:287231-316914 [+] [orf19.3434, OYE23, orf19.3435, orf19.3432, orf19.3436]

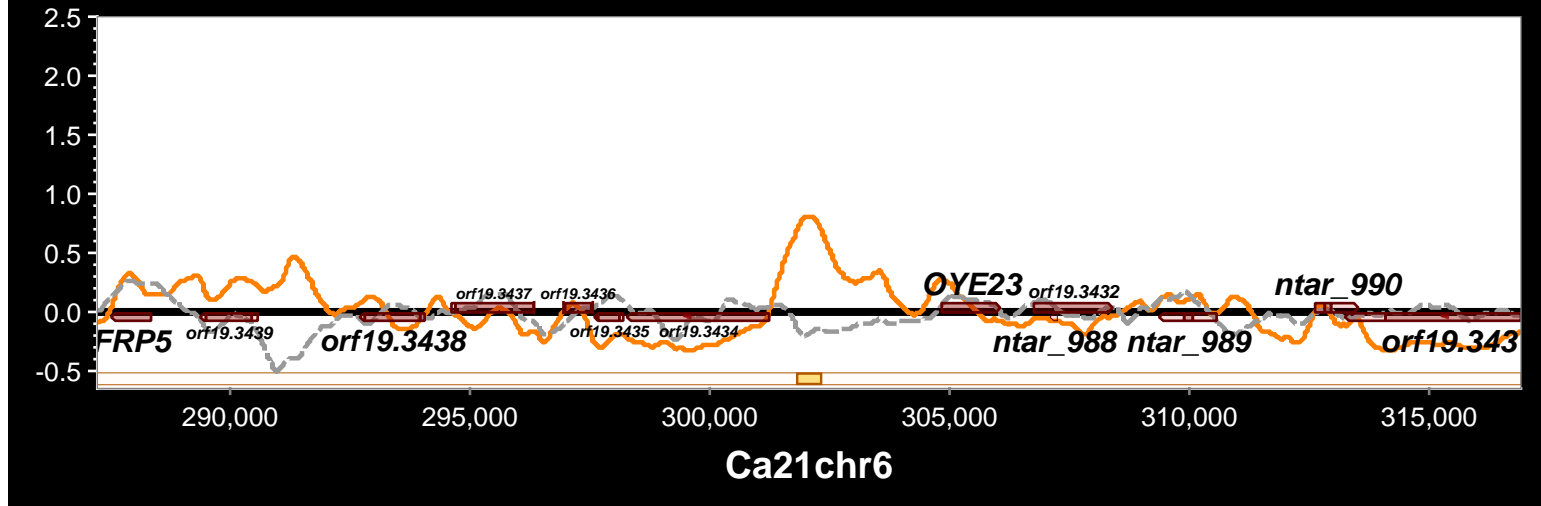

[0.802] Ca21chr4:864411-894094 [+] [ECM1, orf19.5300, orf19.5297, orf19.5296, PGA31]

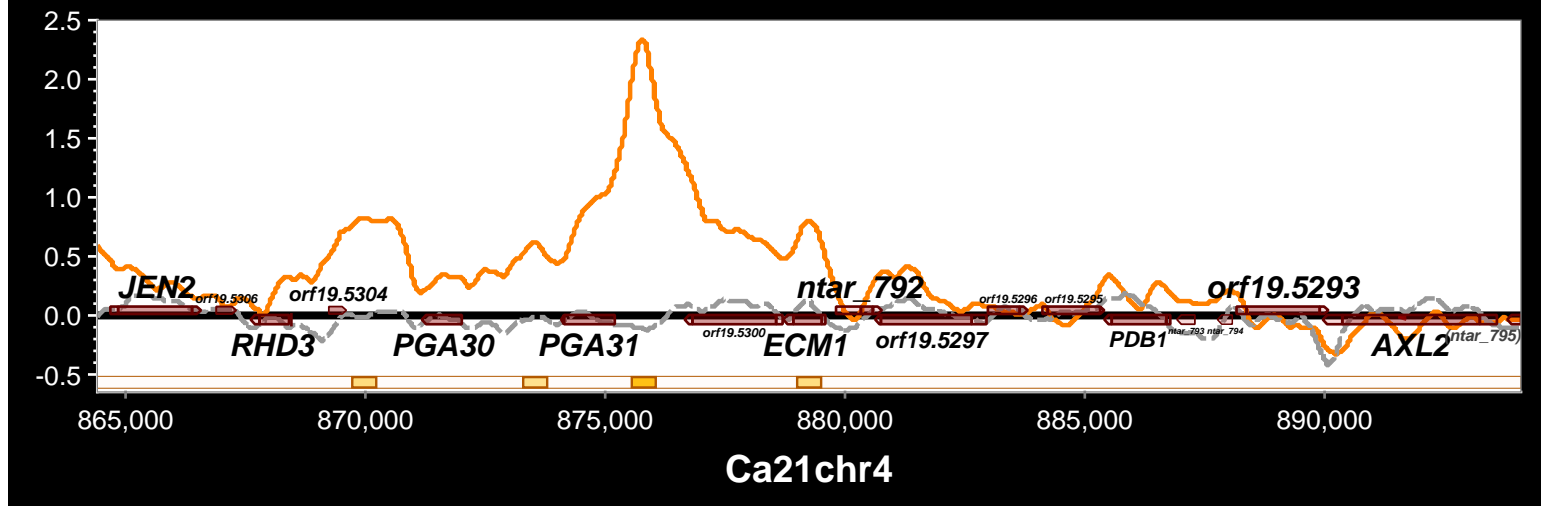

[0.801] Ca21chr5:97192-126875 [+] [AGA1, orf19.936, orf19.938, orf19.934, orf19.933]

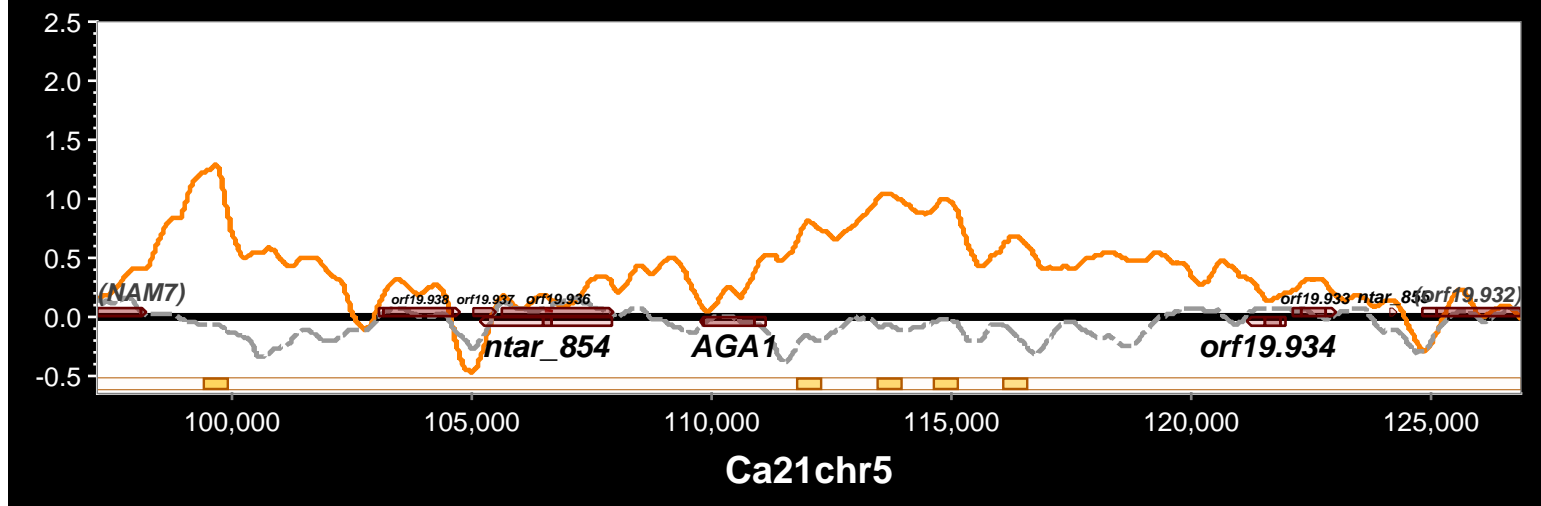

[0.799] Ca21chr2:770135-799818 [+] [orf19.849, orf19.850, tR(UCU)2, tF(GAA)2, orf19.851]

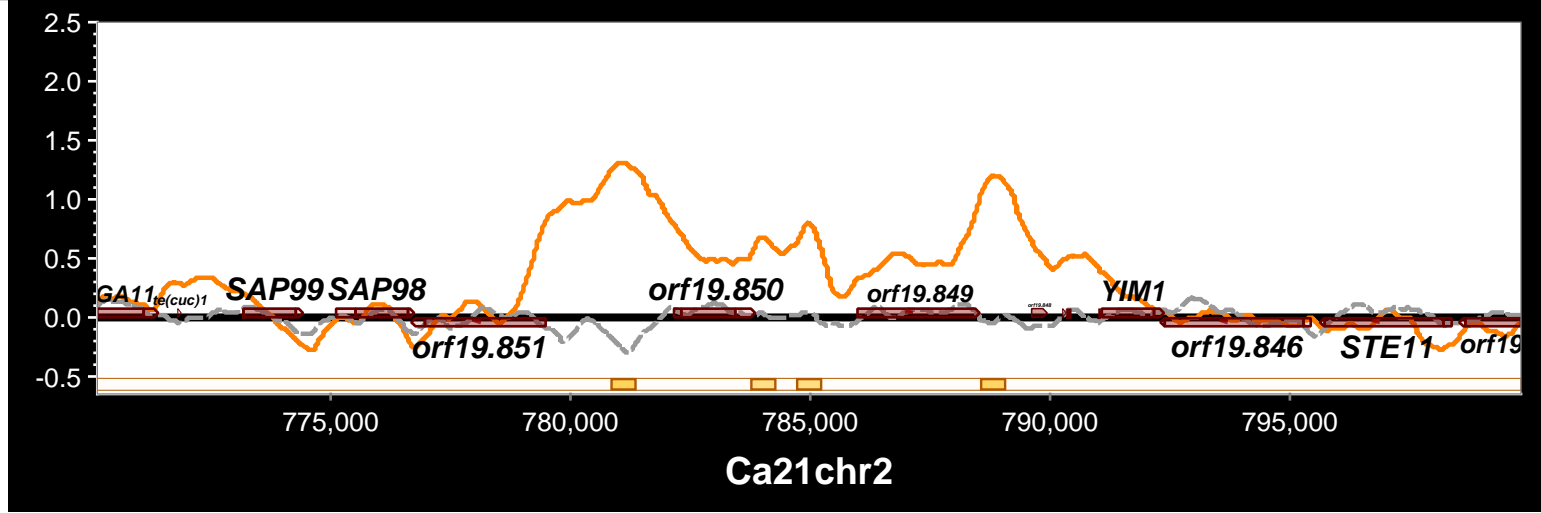

[0.799] Ca21chr4:1032138-1061821 [+] [orf19.3793, CSR1, orf19.3792, AGP3, FGR10]

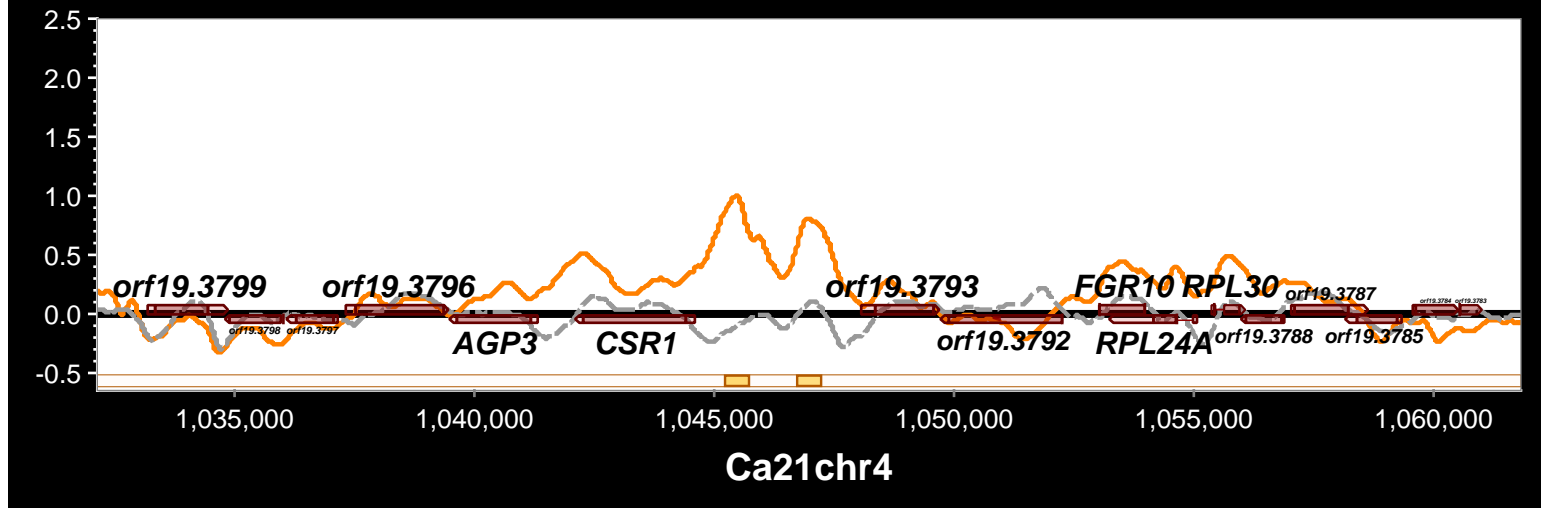

[0.793] Ca21chr3:1099760-1129443 [+] [WOR2, orf19.5991, orf19.5989, orf19.5987, RHB1]

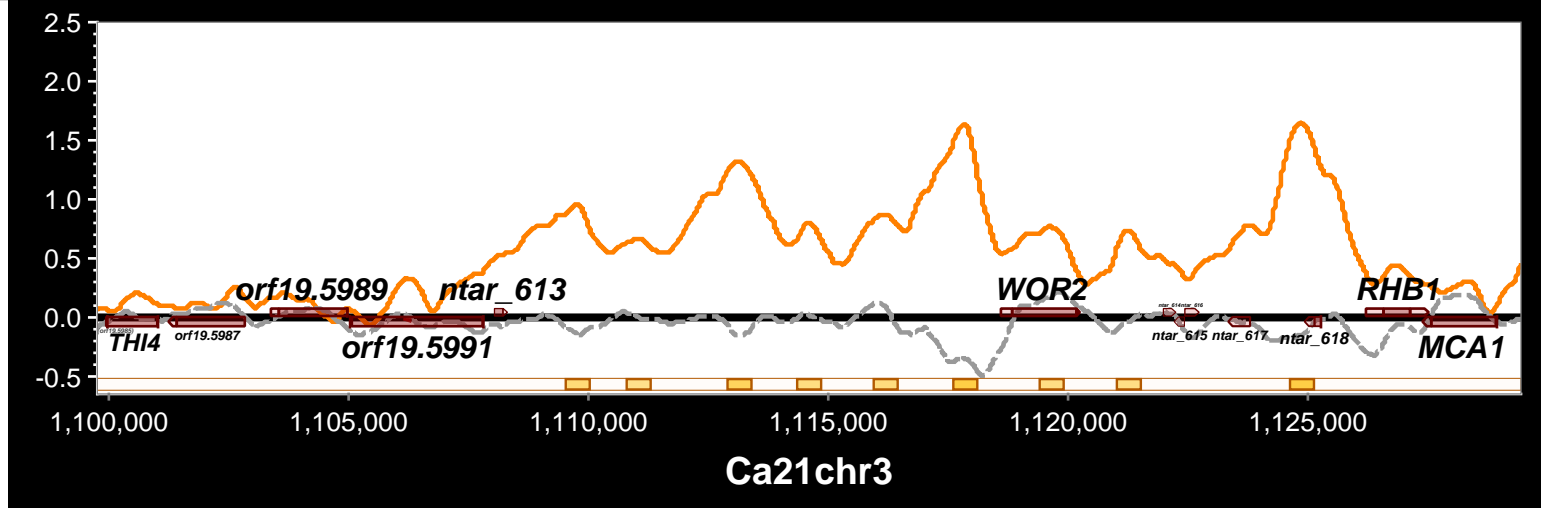

[0.791] Ca21chr1:3146687-3176370 [+] [orf19.7250, RIM101, WSC4, orf19.7252, orf19.7245]

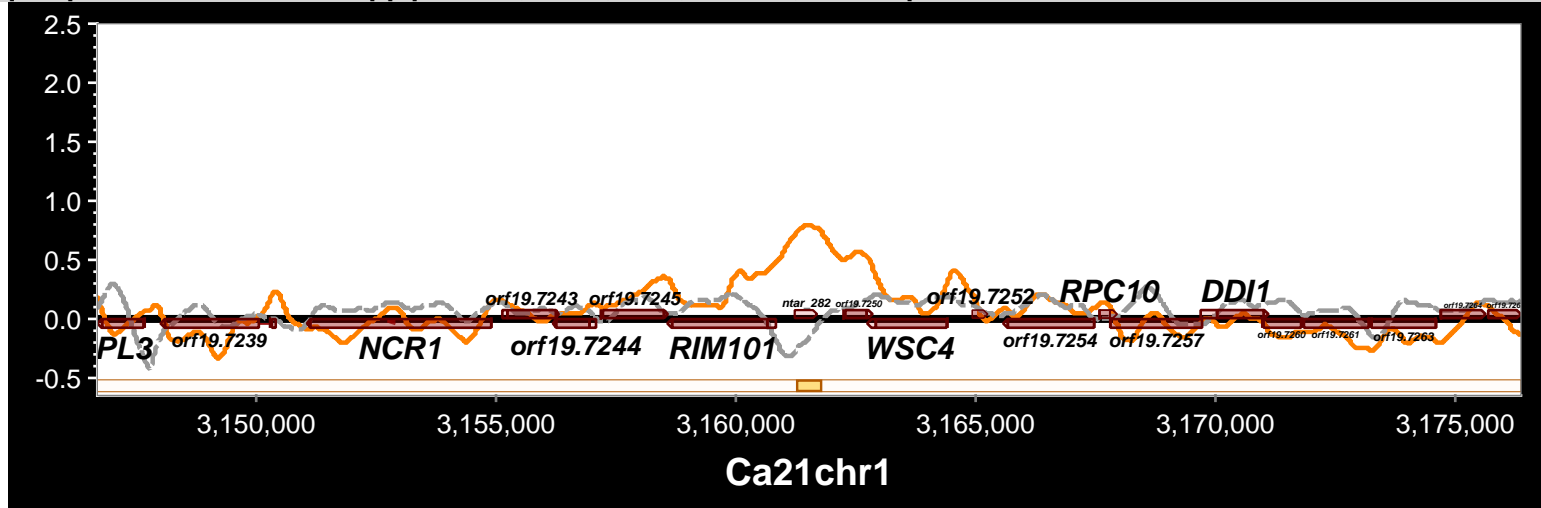

[0.785] Ca21chr2:305428-335111 [+] [orf19.1488, tL(CAA)1, orf19.1486, MSB2, orf19.1485]

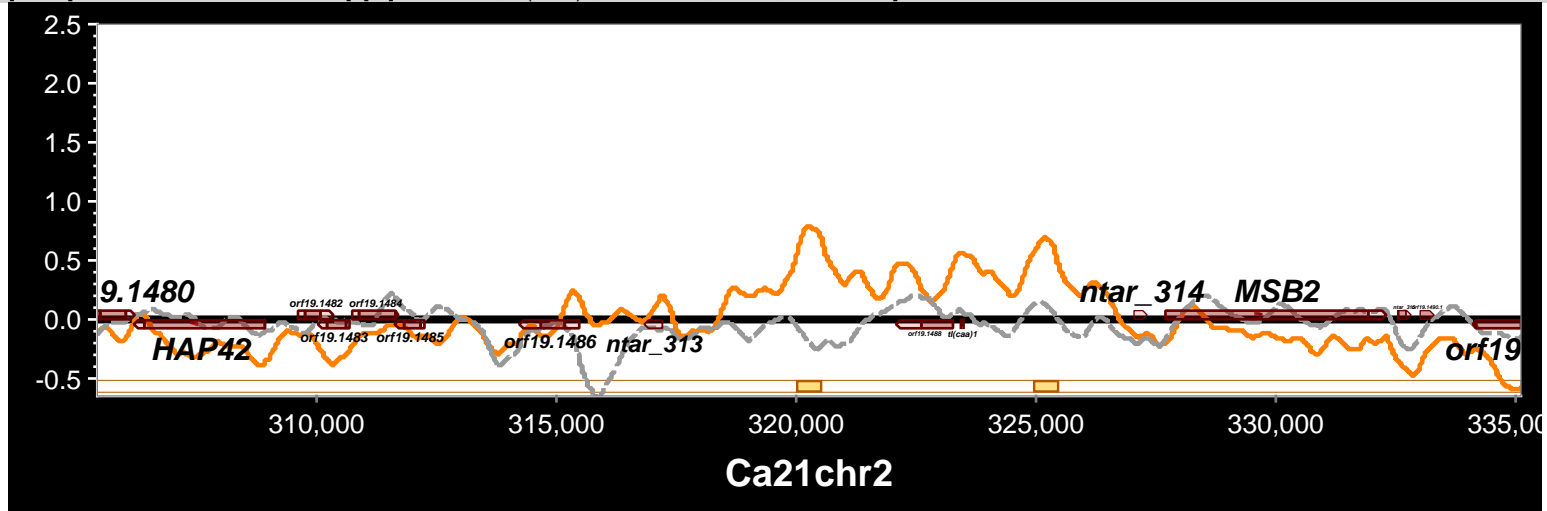

[0.784] Ca21chr5:839354-869037 [+] [orf19.1105.3, PGA56, orf19.1106, orf19.1105, orf19.3220]

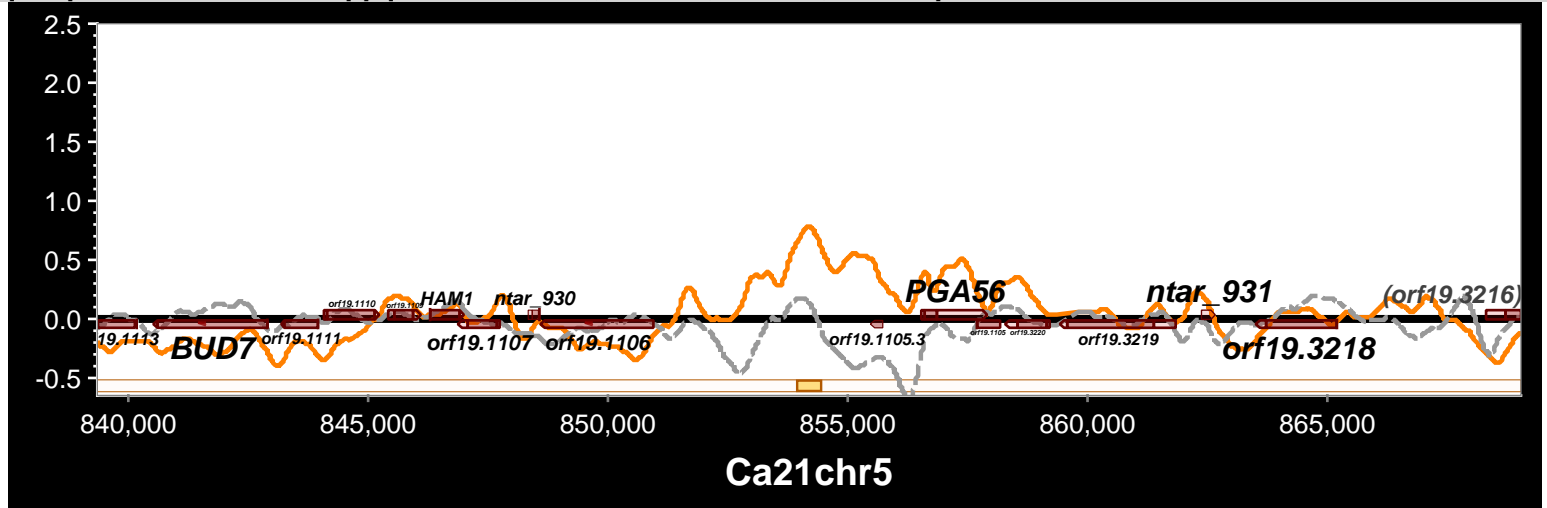

[0.78] Ca21chr1:2387868-2417551 [+] [orf19.2332, orf19.2333, ADA2, RPS17B, BIG1]

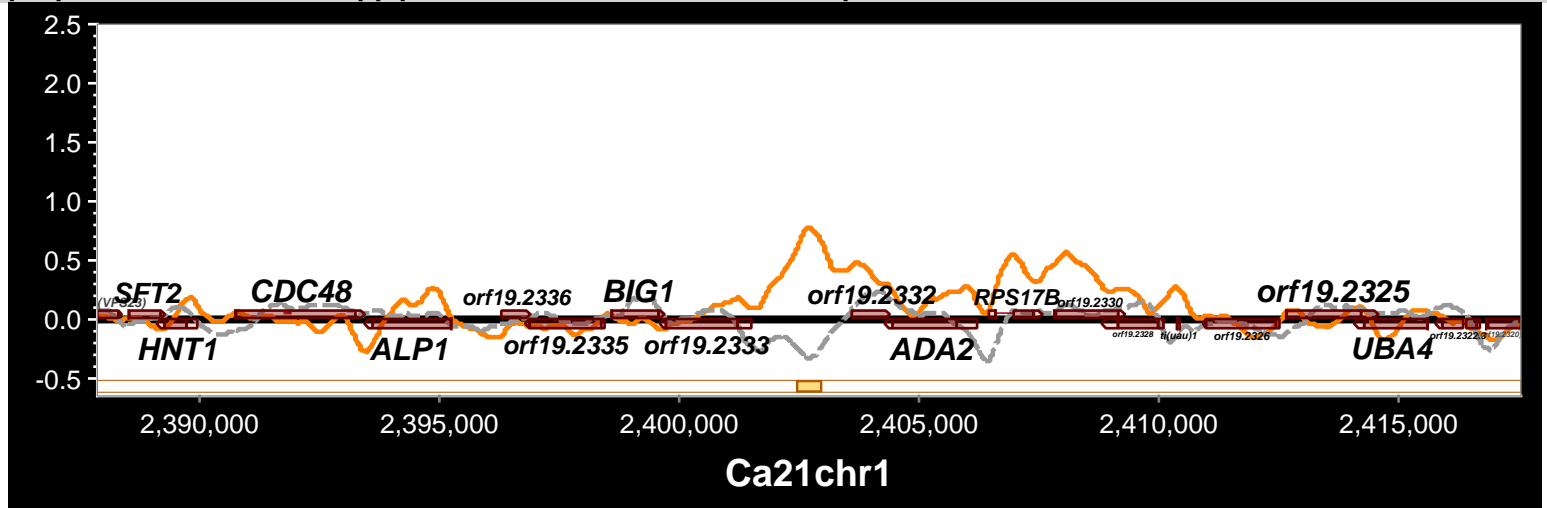

[0.78] Ca21chrR:1179075-1208758 [+] [orf19.5843, tC(GCA)1, tC(GCA)2, orf19.5844, RNR3]

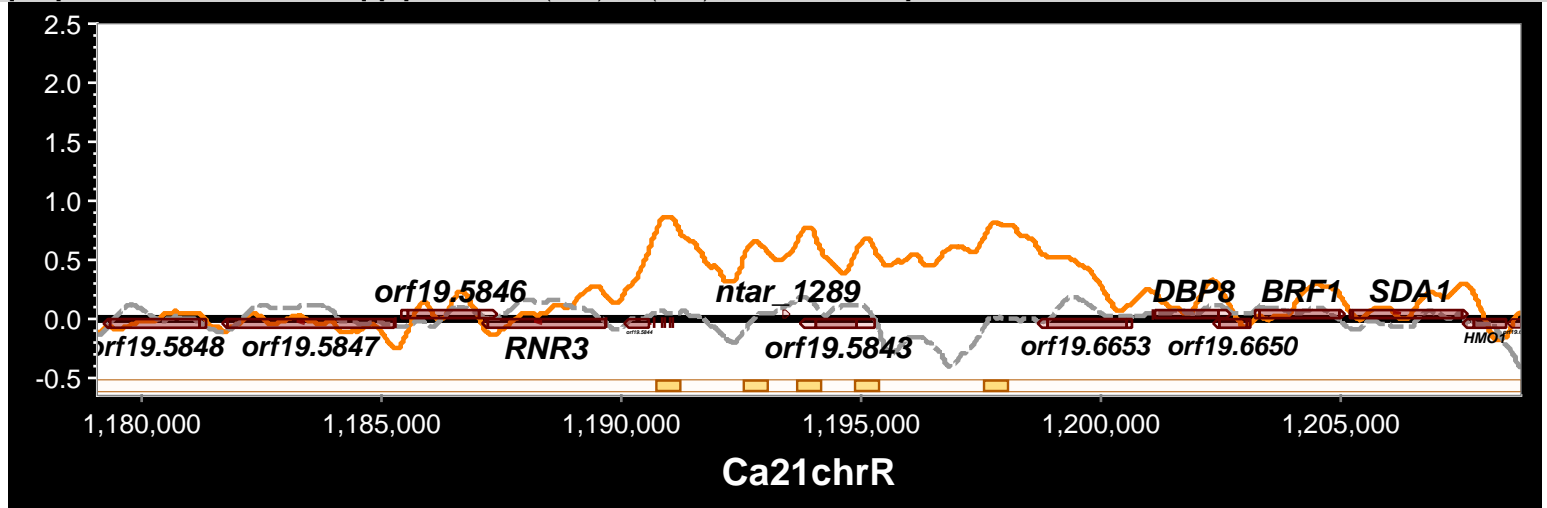

[0.779] Ca21chr2:149046-178729 [+] [HGT7, orf19.2024, orf19.2025, orf19.2026, HGT8]

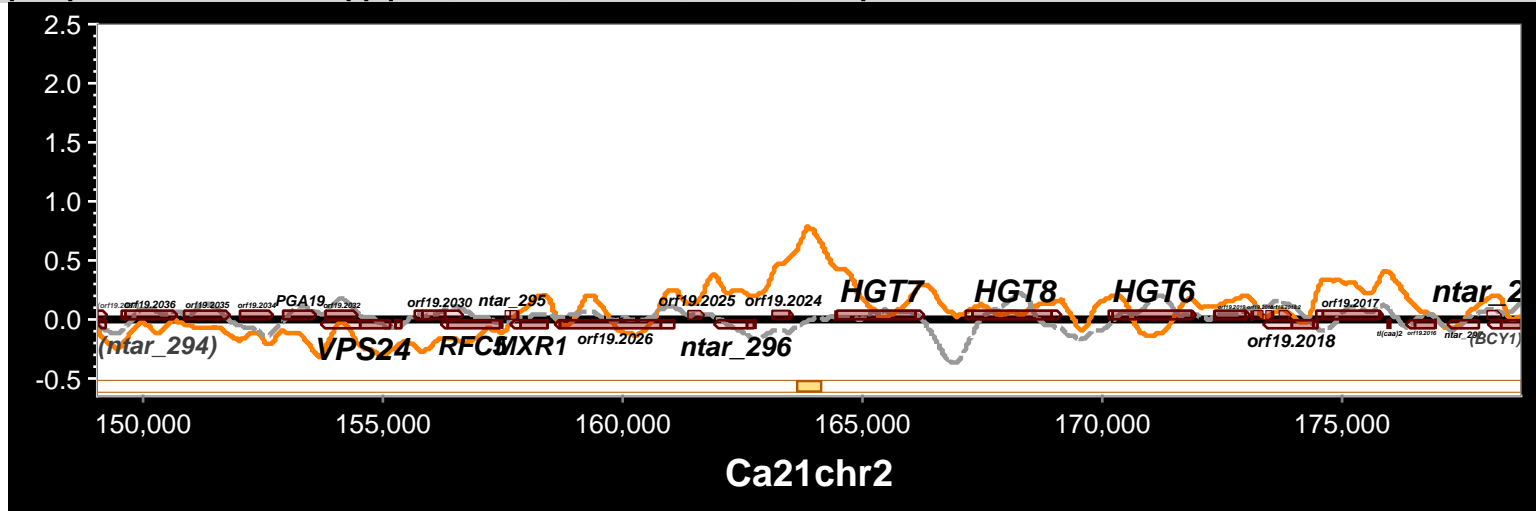

[0.779] Ca21chr5:875574-905257 [+] [FGR42, orf19.1287, orf19.1286, orf19.3210, orf19.1285]

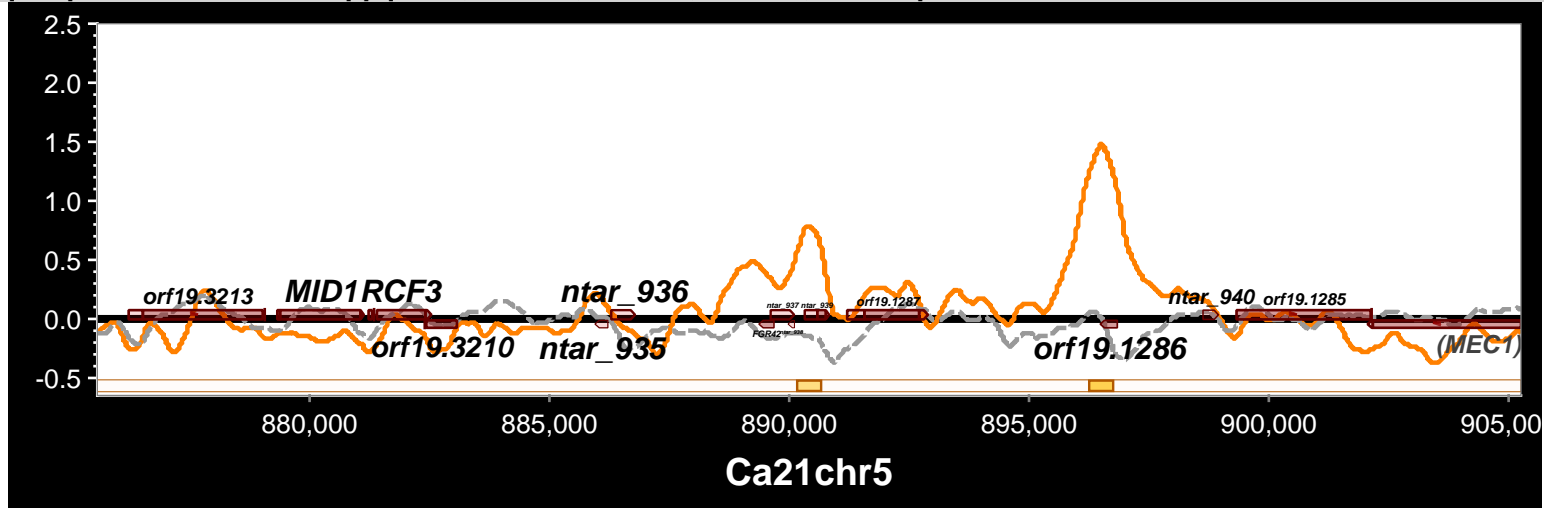

[0.775] Ca21chr4:551549-581232 [+] [orf19.2725, orf19.2724, orf19.2726, GRX3, orf19.2728]

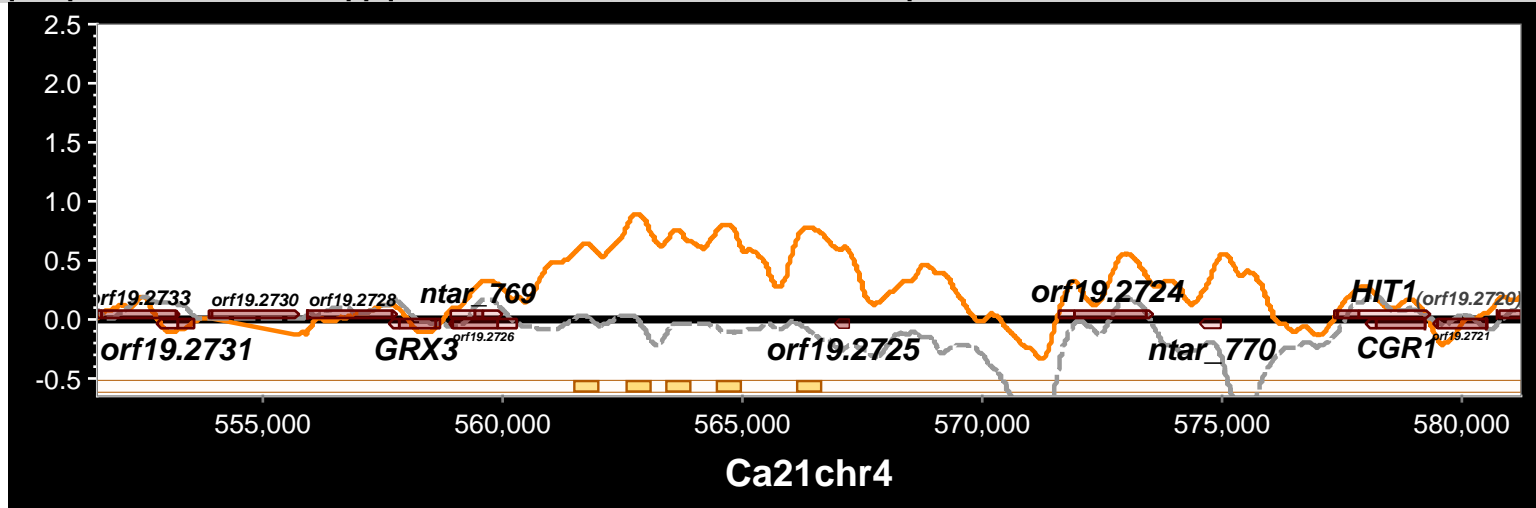

[0.772] Ca21chr3:1460512-1490195 [+] [AAF1, ECM15, tH(GUG)3, orf19.7437, GLG2]

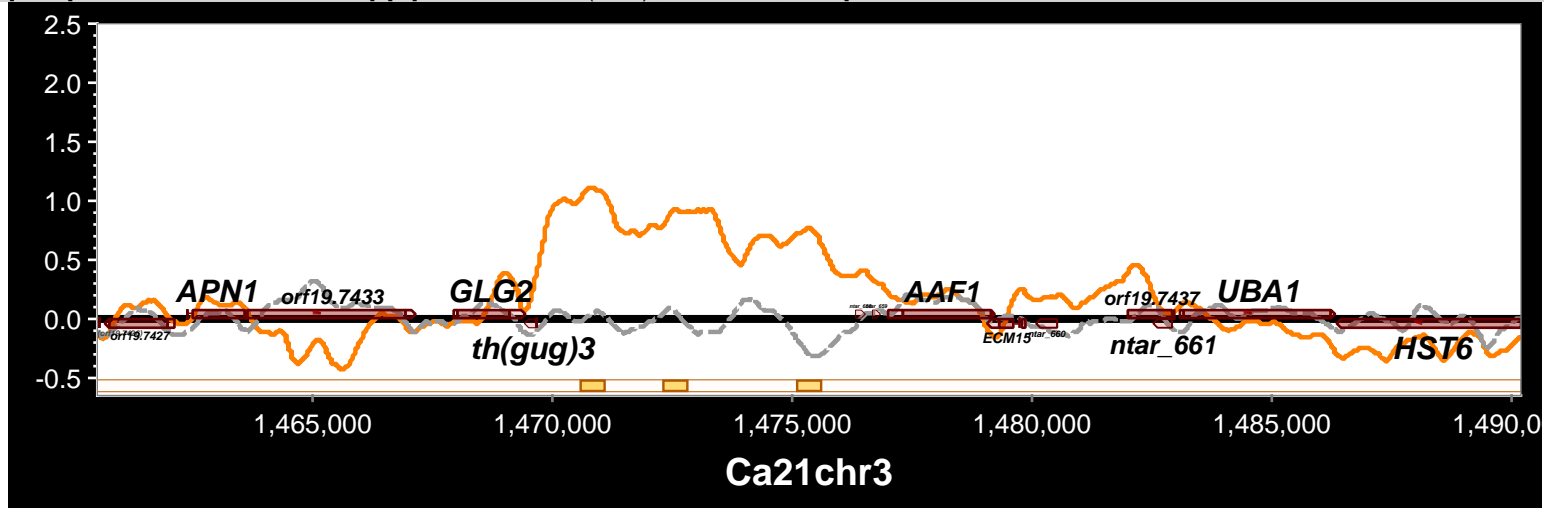

[0.767] Ca21chr3:719427-749110 [+] [orf19.344, orf19.345, BMT7, orf19.341, orf19.346]

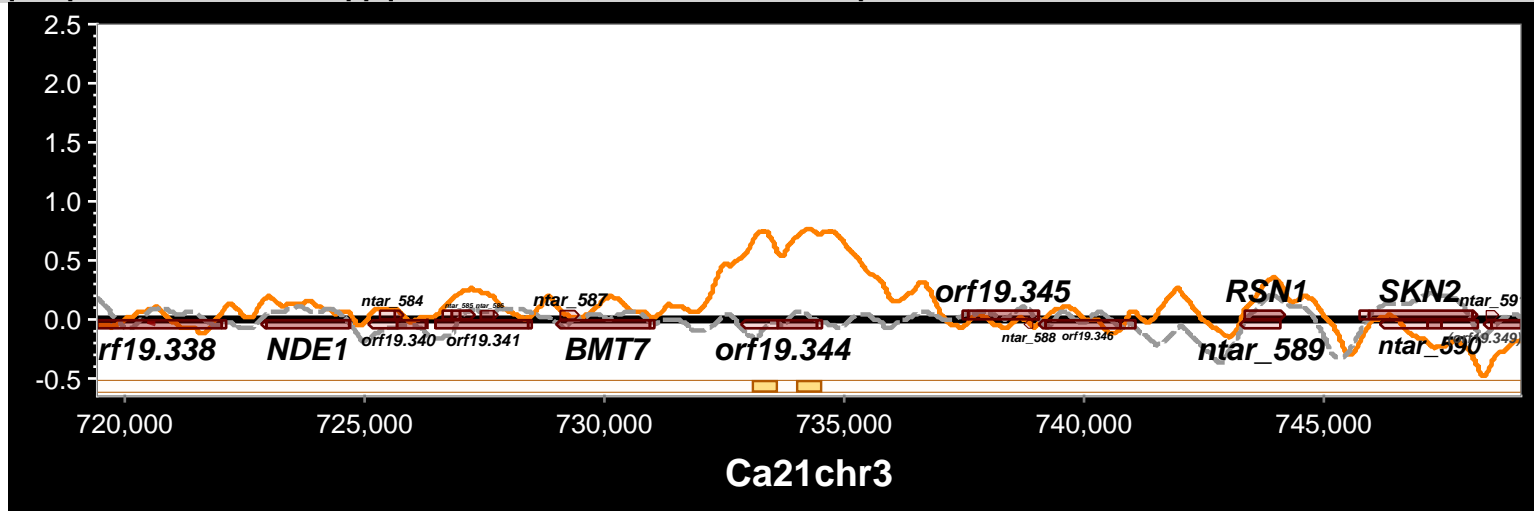

[0.767] Ca21chr6:969231-998914 [+] [orf19.2124, orf19.2125, orf19.2127, CEN6, orf19.2129]

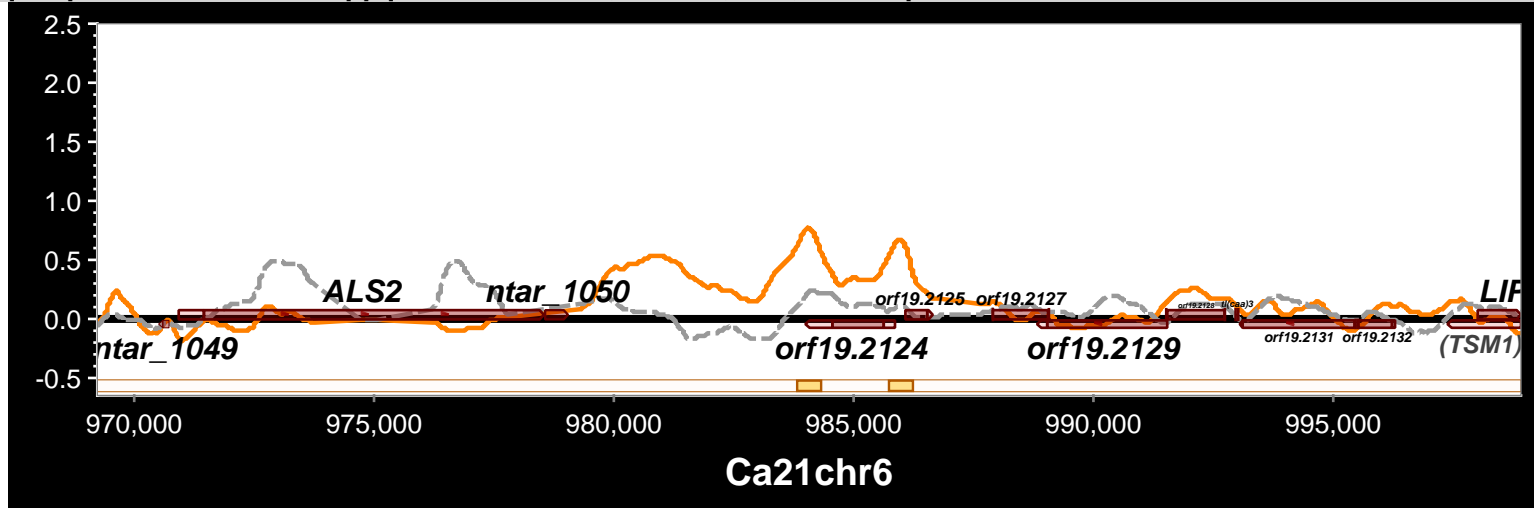

[0.766] Ca21chr3:1464-31147 [+] [orf19.5465, RPS24, orf19.5464, TLO7, orf19.5463]

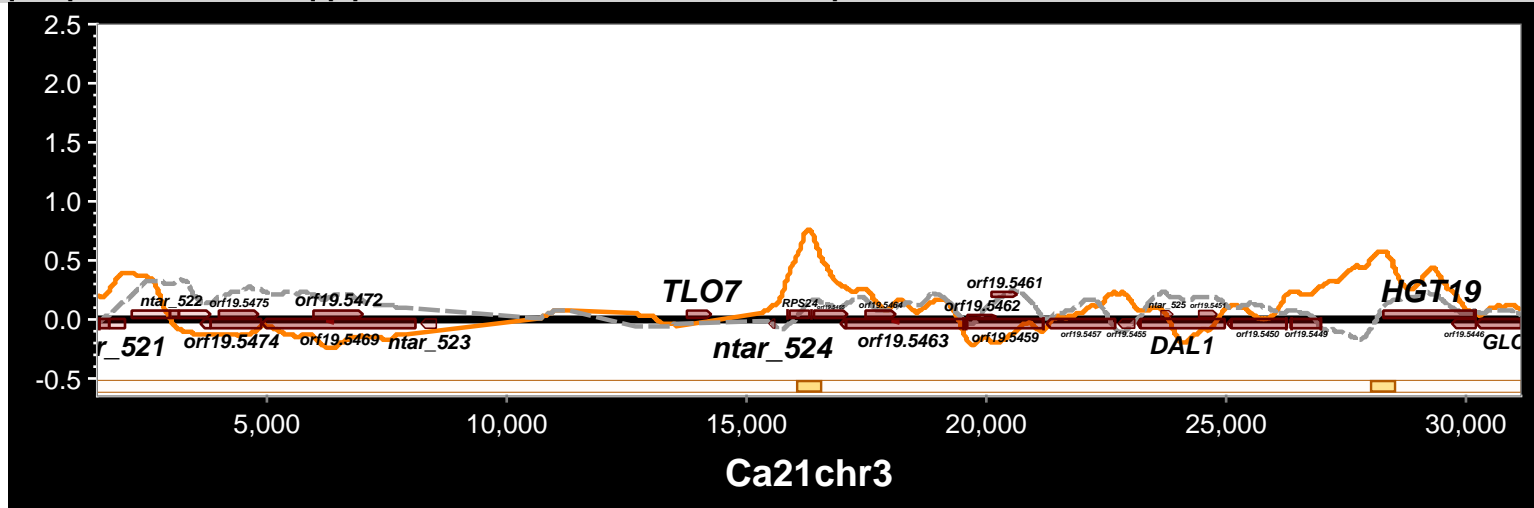

[0.761] Ca21chrR:592470-622153 [+] [orf19.2825, RFG1, orf19.2826, orf19.2827, orf19.2828]

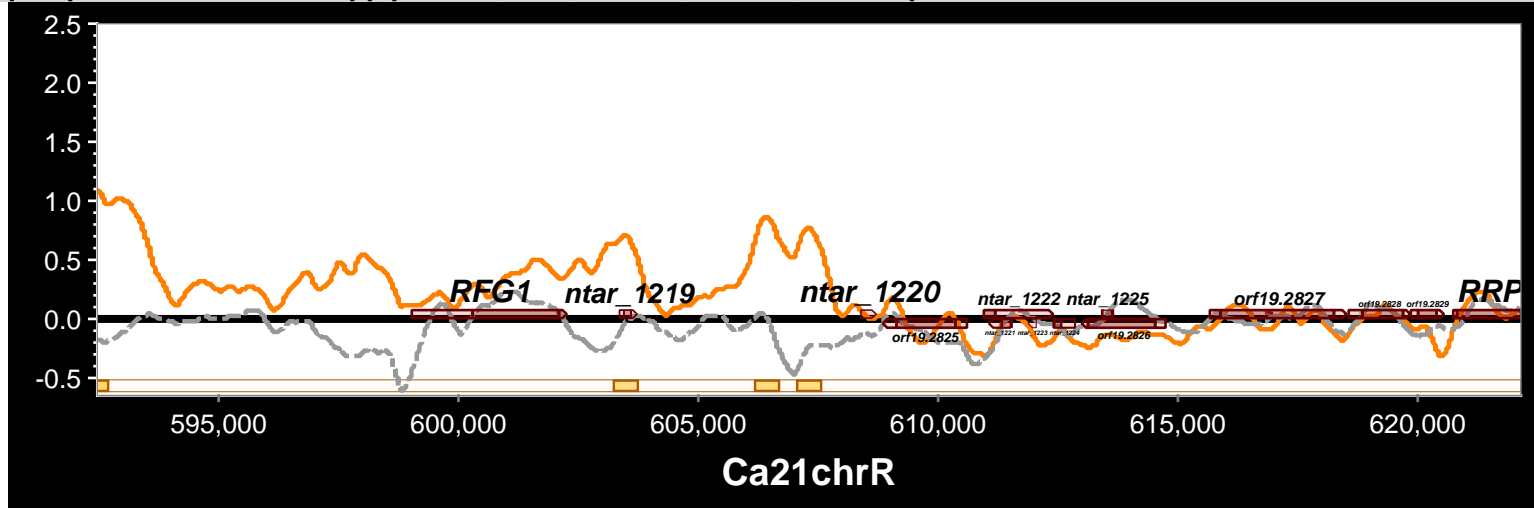

[0.76] Ca21chr3:524011-553694 [+] [PHA2, RPL9B, CCP1, HRT1, orf19.232]

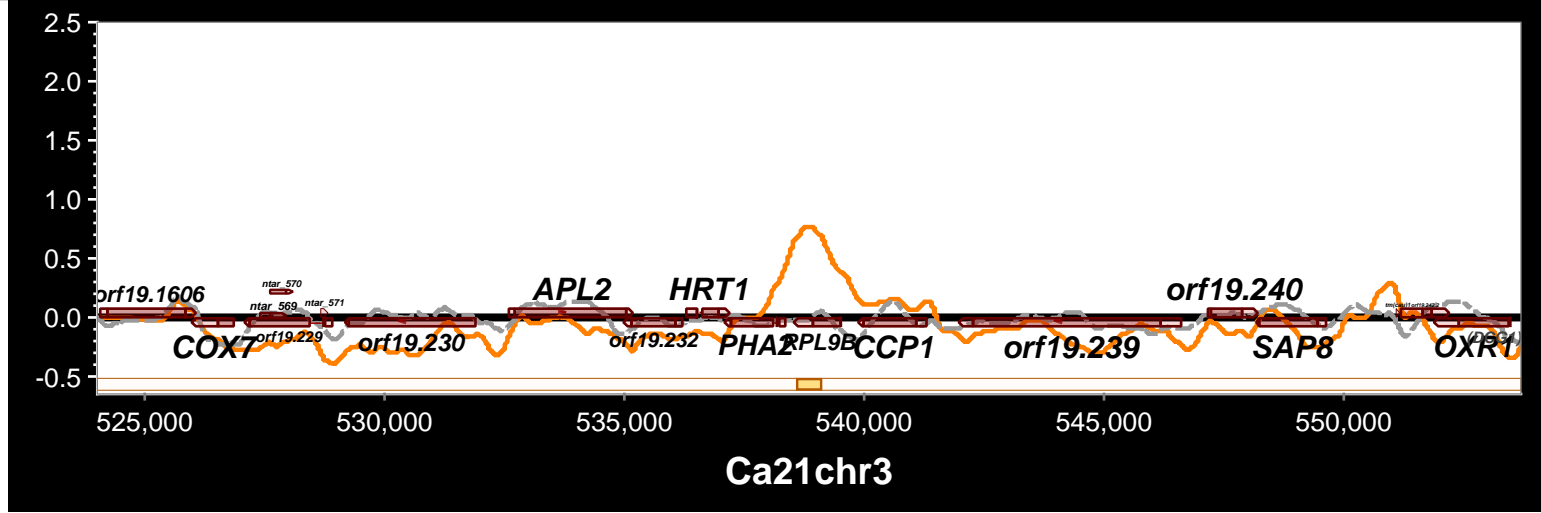

[0.76] Ca21chr4:548822-578505 [+] [orf19.2725, orf19.2726, GRX3, orf19.2728, orf19.2724]

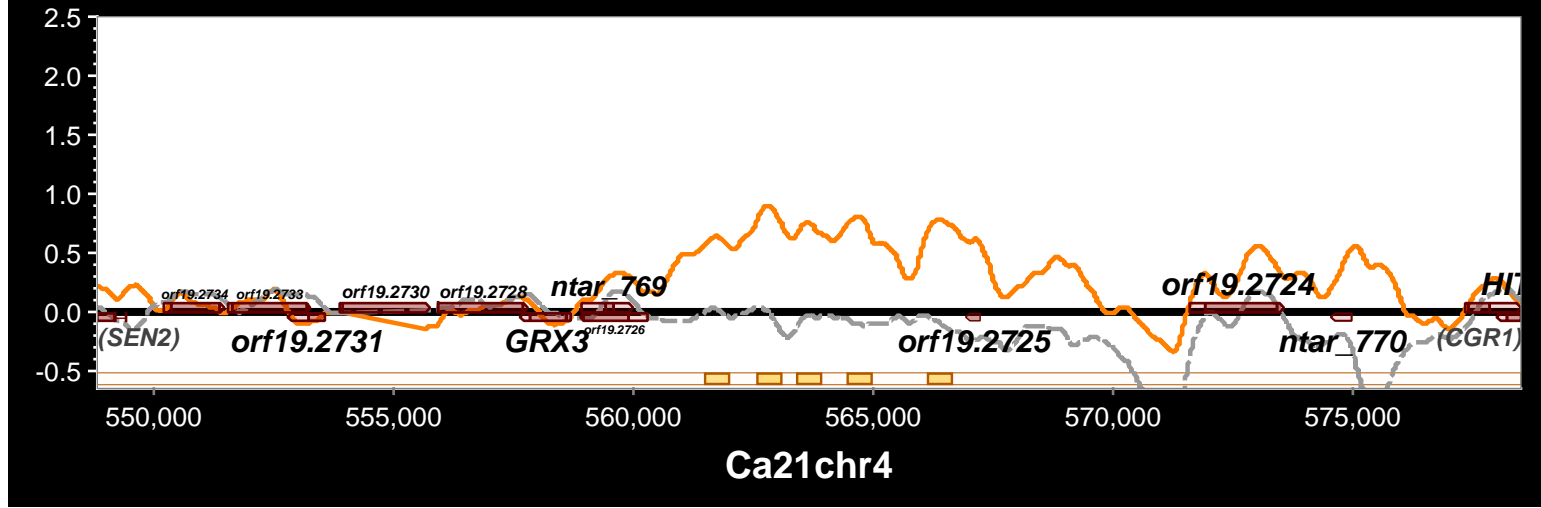

[0.759] Ca21chr3:1104817-1134500 [+] [WOR2, RHB1, MCA1, RPS19A, orf19.5991]

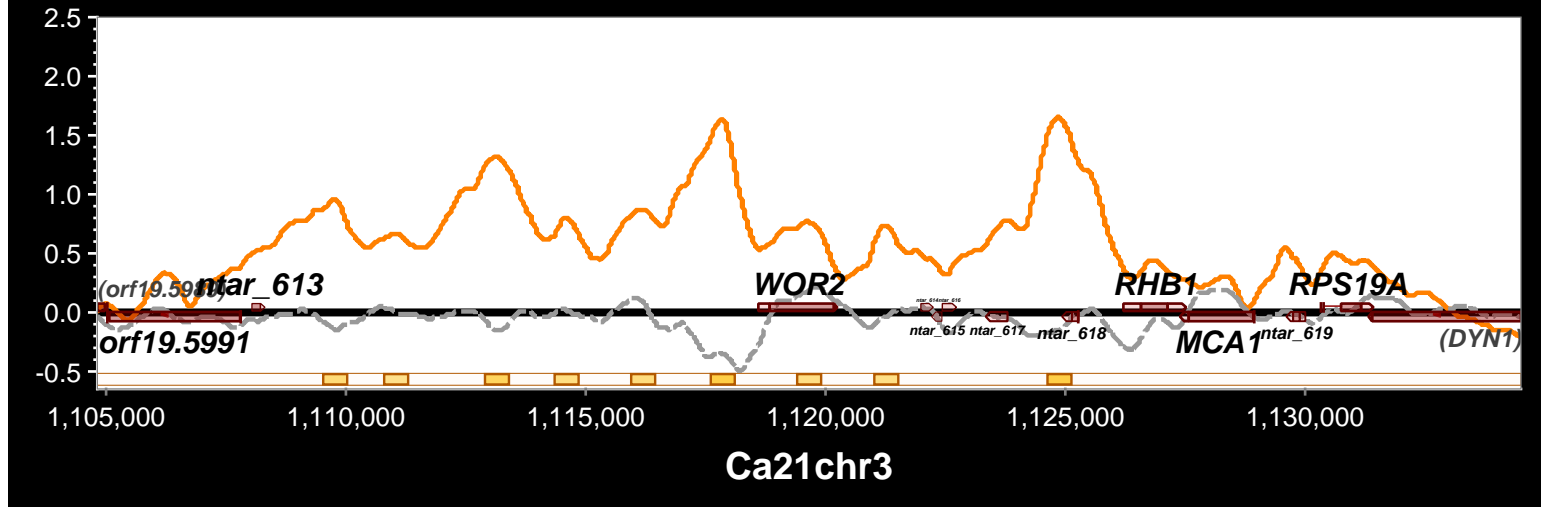

[0.757] Ca21chr5:1041027-1070710 [+] [orf19.3969, orf19.3970, orf19.3971, orf19.3968, orf19.3972]

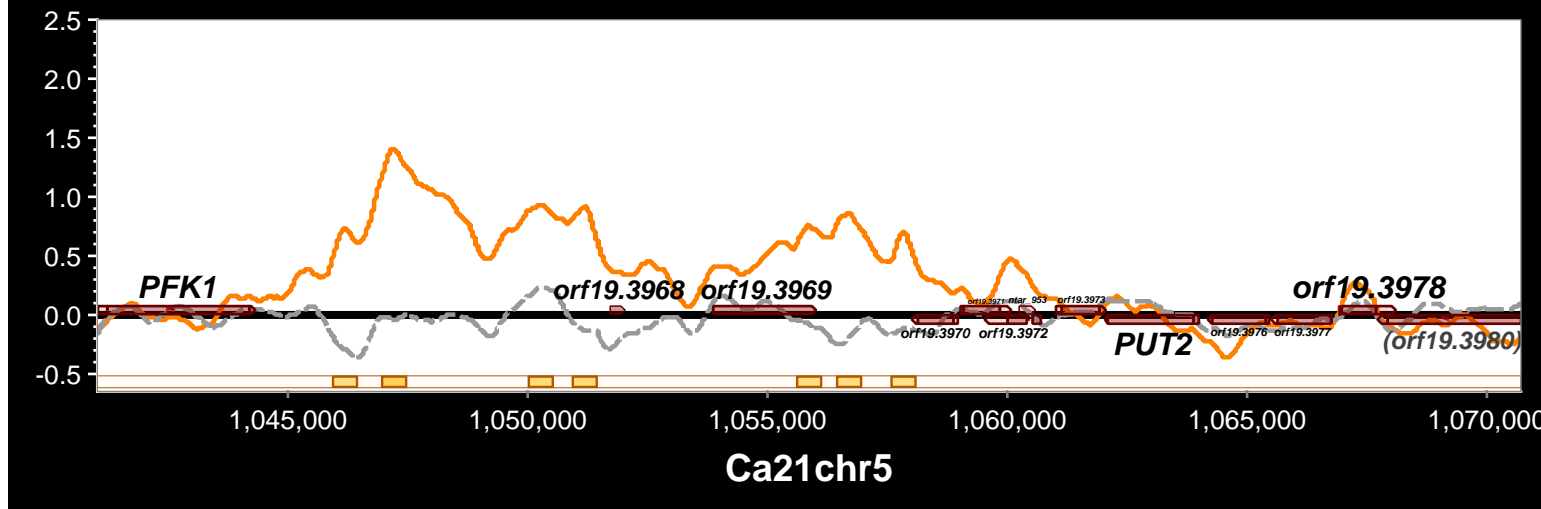

[0.756] Ca21chr7:901868-931551 [+] [orf19.7151, NRG1, orf19.7152, orf19.7153, orf19.7149]

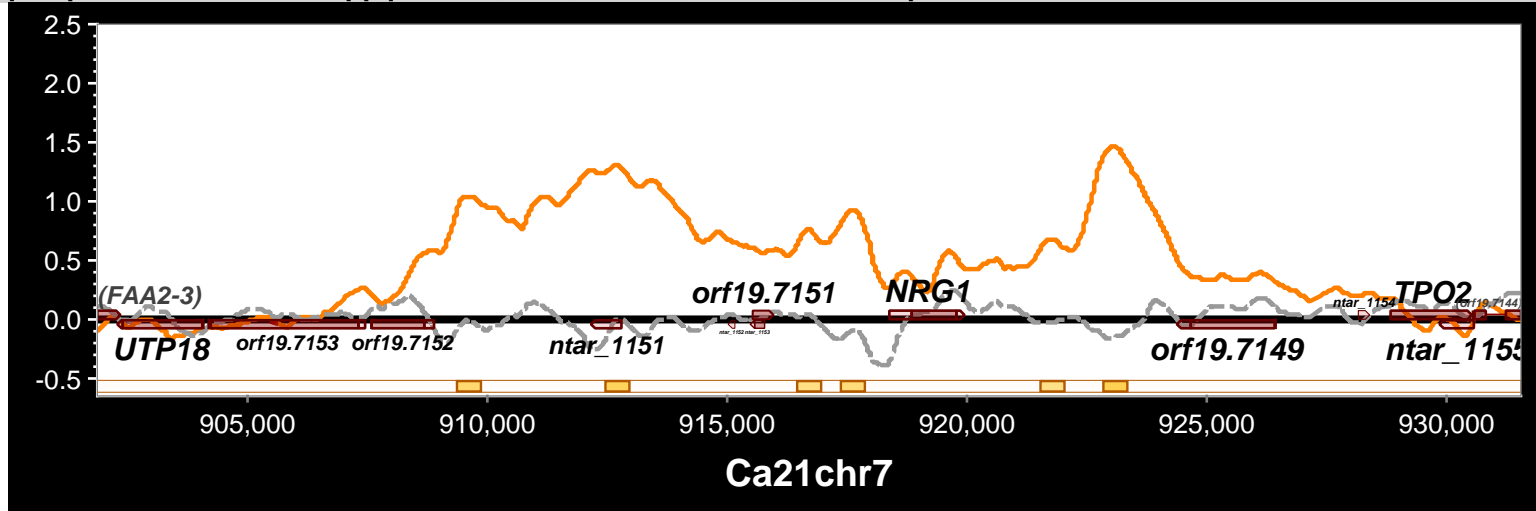

[0.754] Ca21chr3:968689-998372 [+] [orf19.5924, orf19.5921, orf19.5920, orf19.5925, MEA1]

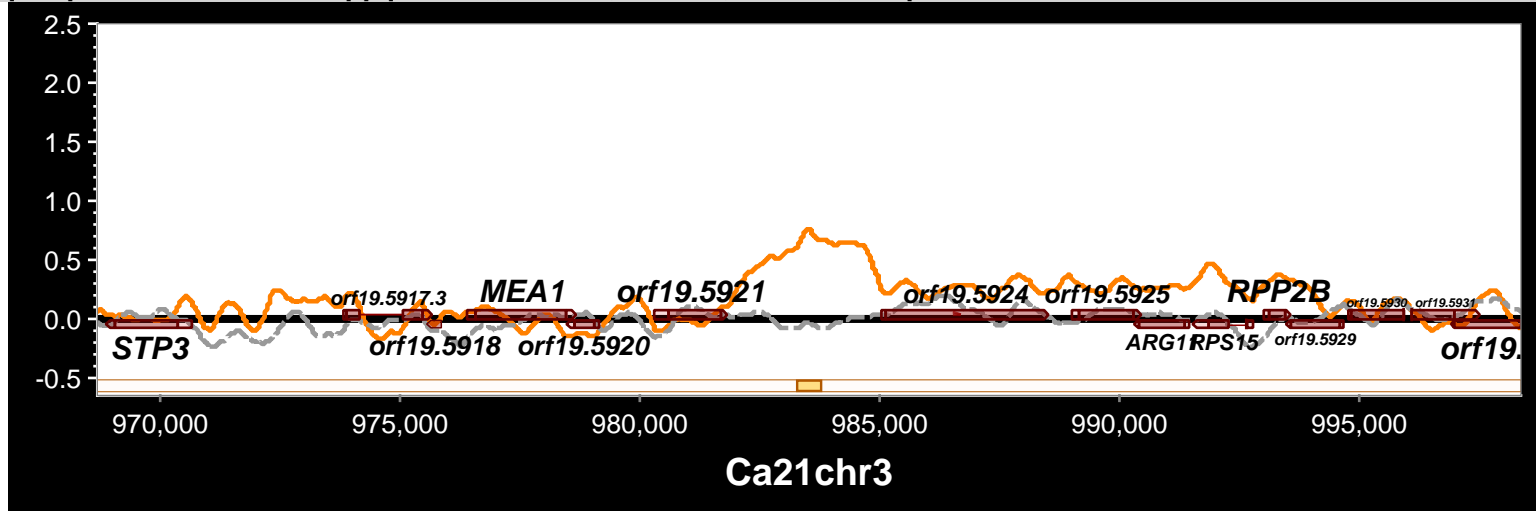

[0.753] Ca21chr7:428583-458266 [+] [HSP90, RAD14, orf19.6518, CUP9, orf19.6520]

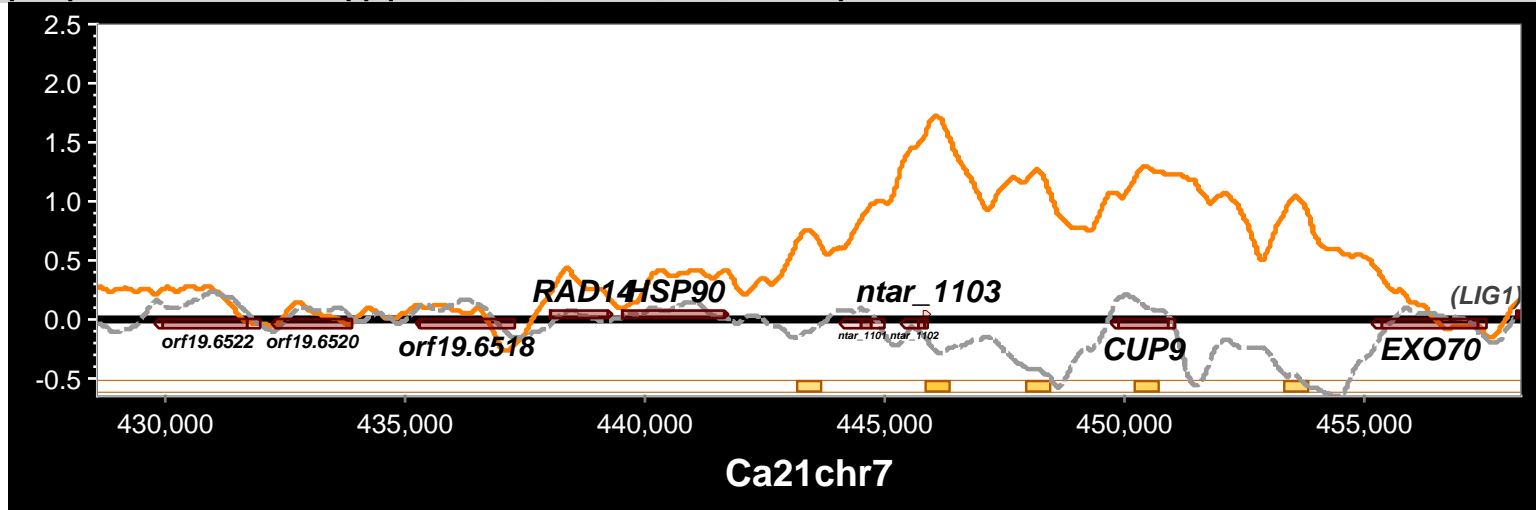

[0.751] Ca21chr5:480344-510027 [+] [orf19.4230, orf19.4229, PTH2, orf19.4228, orf19.4227]

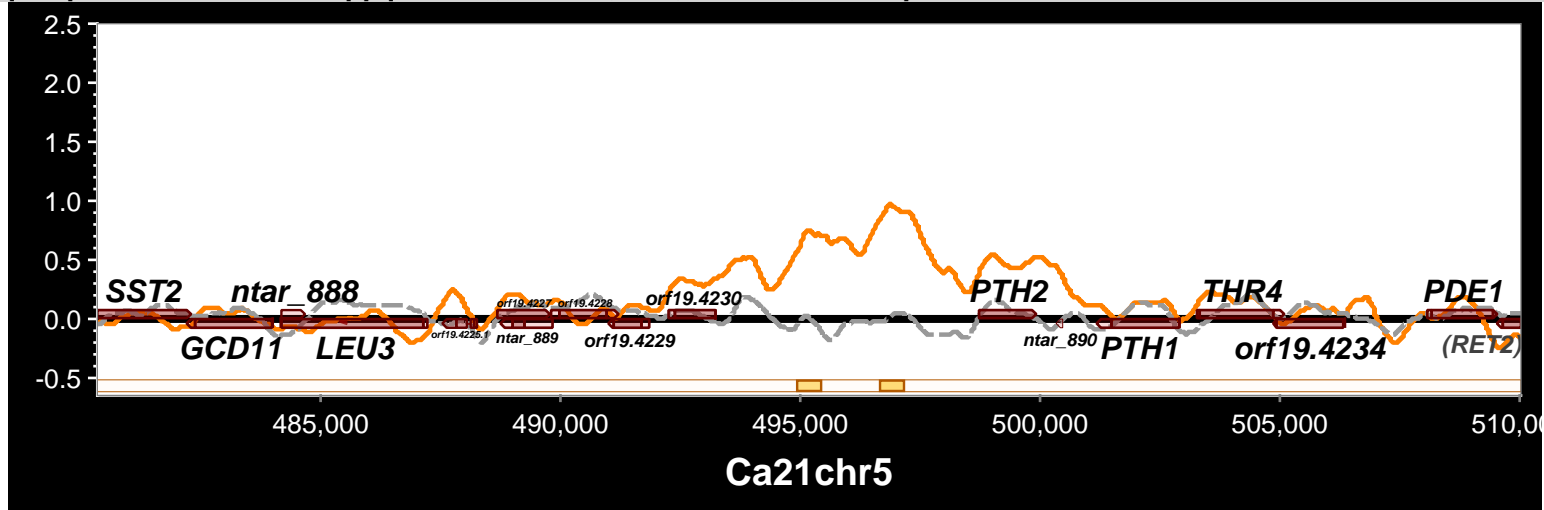

[0.748] Ca21chr5:234982-264665 [+] [orf19.1959, CLN3, CYC3, orf19.1961, orf19.1956]

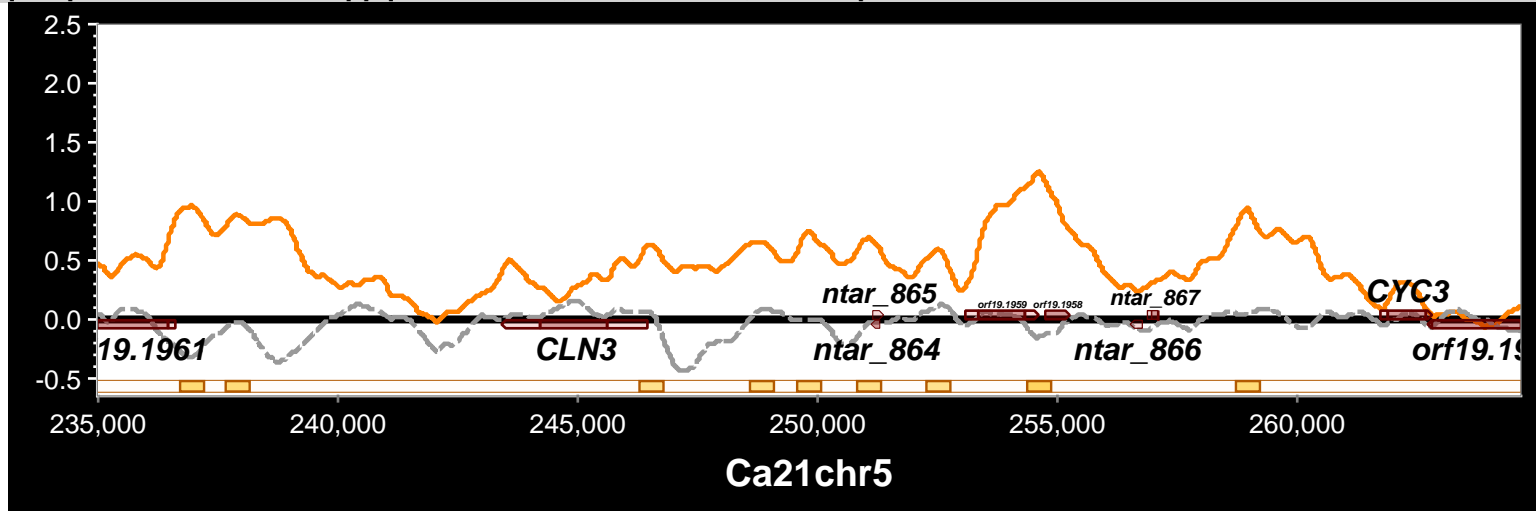

[0.747] Ca21chr6:897559-927242 [+] [orf19.77.1, orf19.4553, SPB1, SEC5, ALS4]

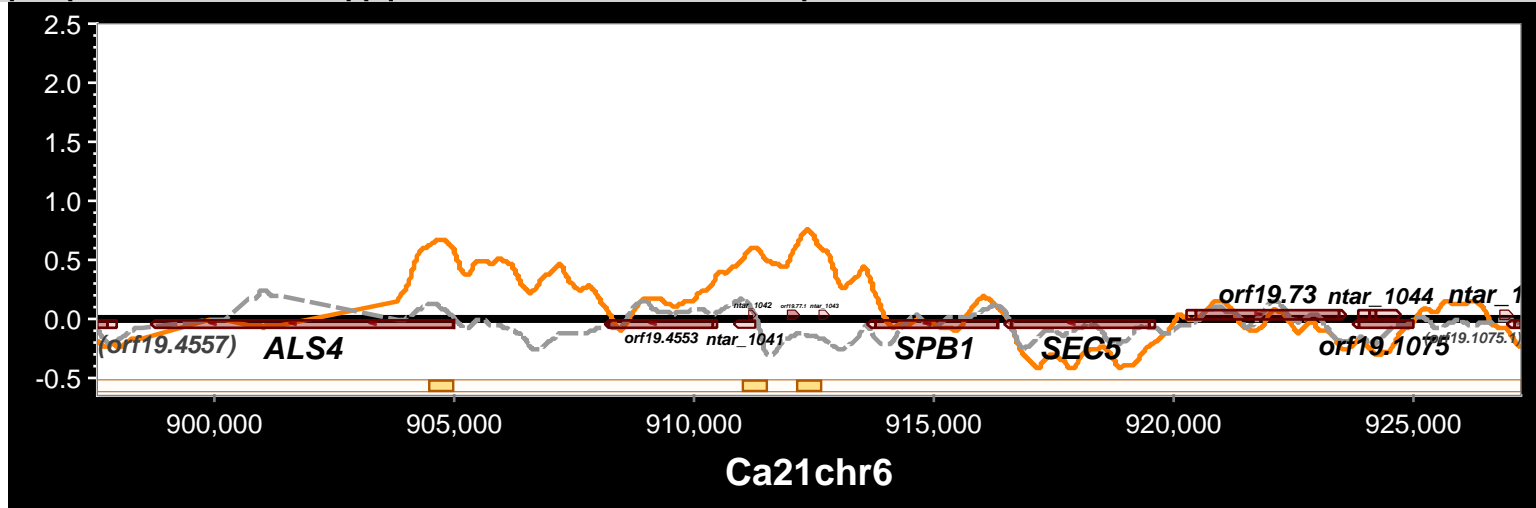

[0.746] Ca21chr3:718504-748187 [+] [orf19.344, BMT7, orf19.345, orf19.341, orf19.340]

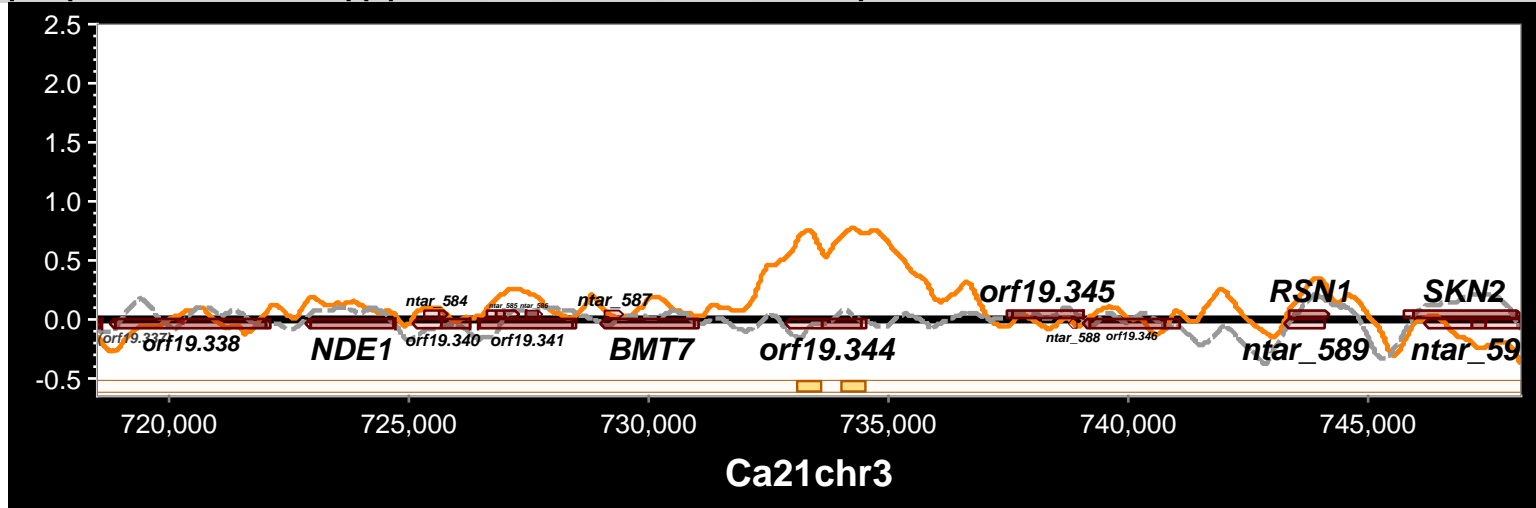

[0.745] Ca21chr3:1177413-1207096 [+] [orf19.6973, YST1, orf19.6976, SMI1B, GPI1]

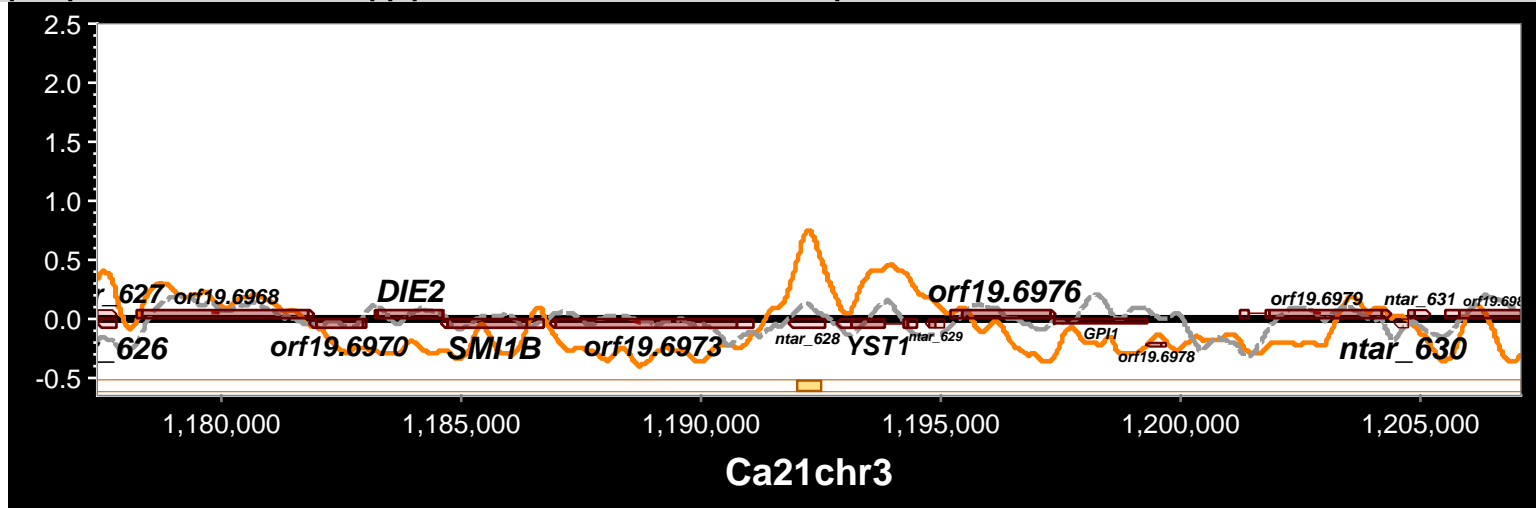



[0.745] Ca21chr3:1575085-1604768 [+] [orf19.6805, orf19.6807, tY(GUA)3, orf19.6809, orf19.6804]

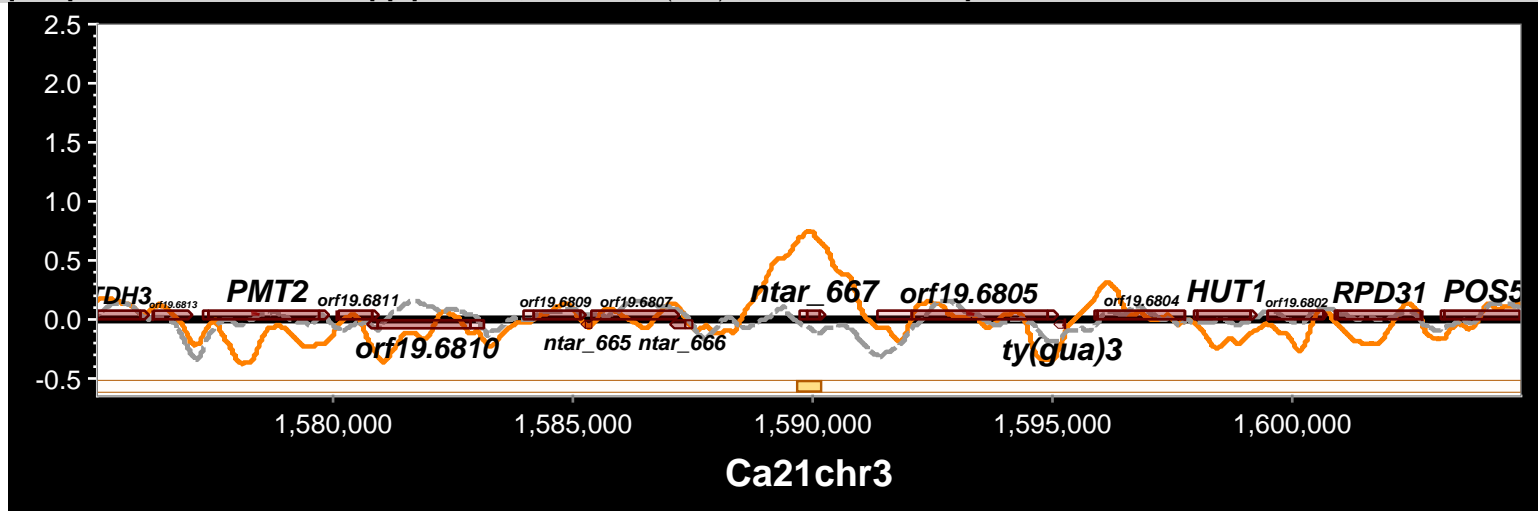

[0.745] Ca21chr5:147816-177499 [+] [IFF8, SPE2, TFB3, RMT2, HYR3]

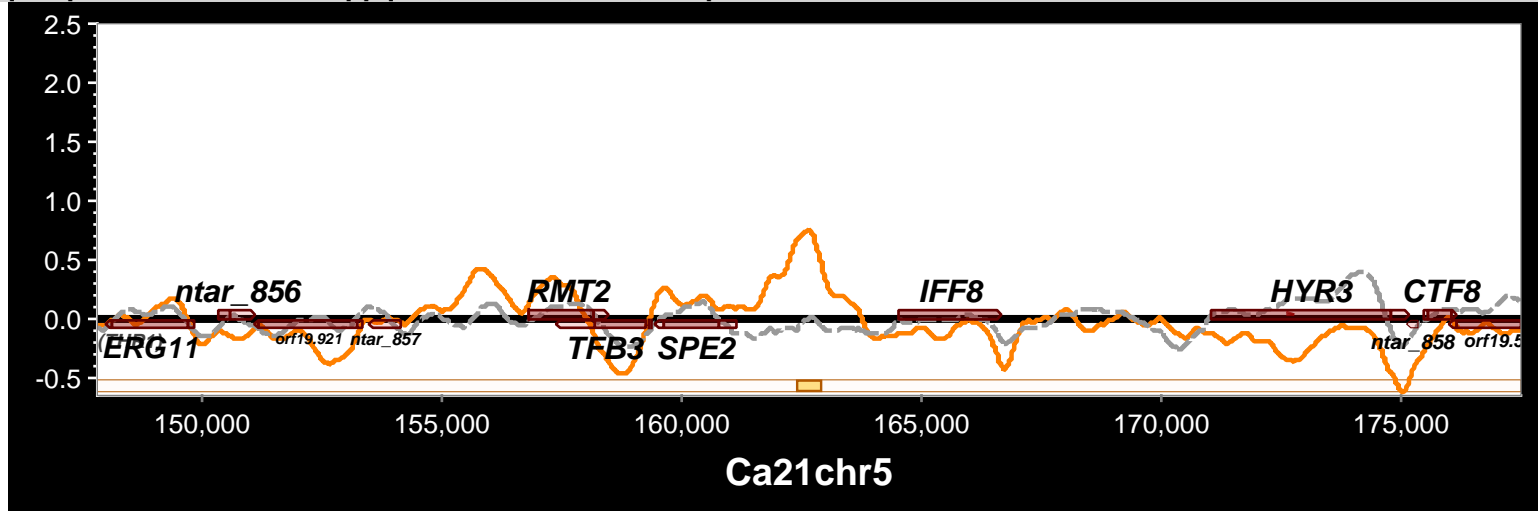

[0.743] Ca21chr1:1010844-1040527 [+] [orf19.750, orf19.751, orf19.752, orf19.48, orf19.753]

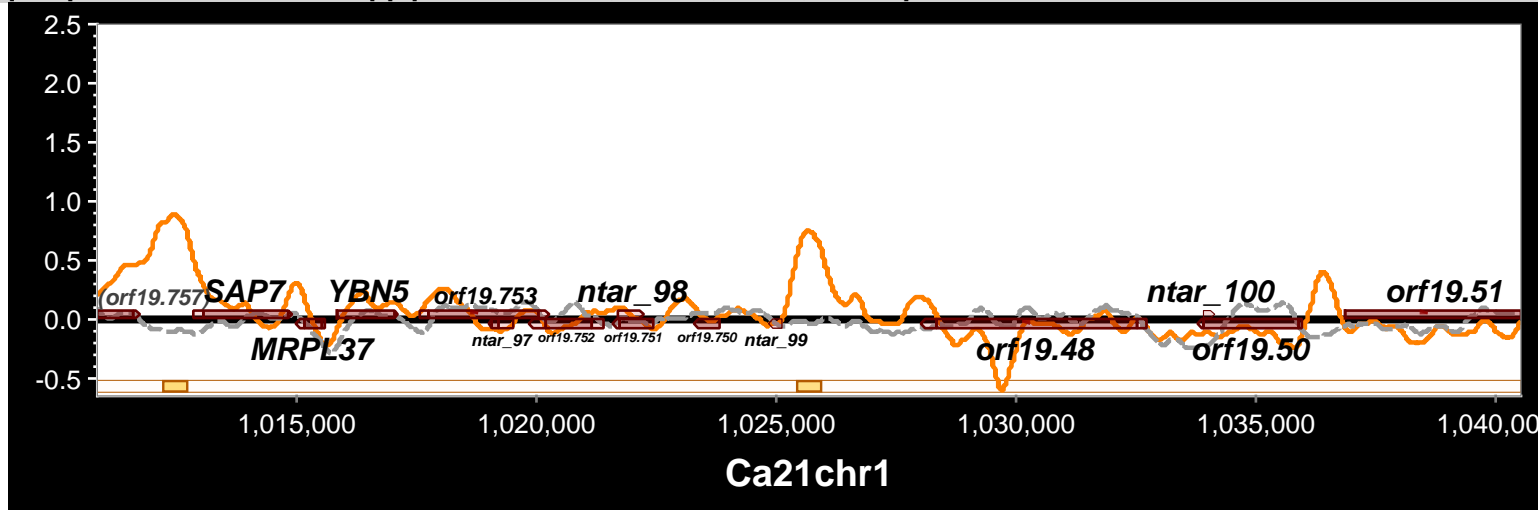

[0.742] Ca21chr3:277119-306802 [+] [URA3, IRO1, orf19.1717, PGA44, orf19.1718]

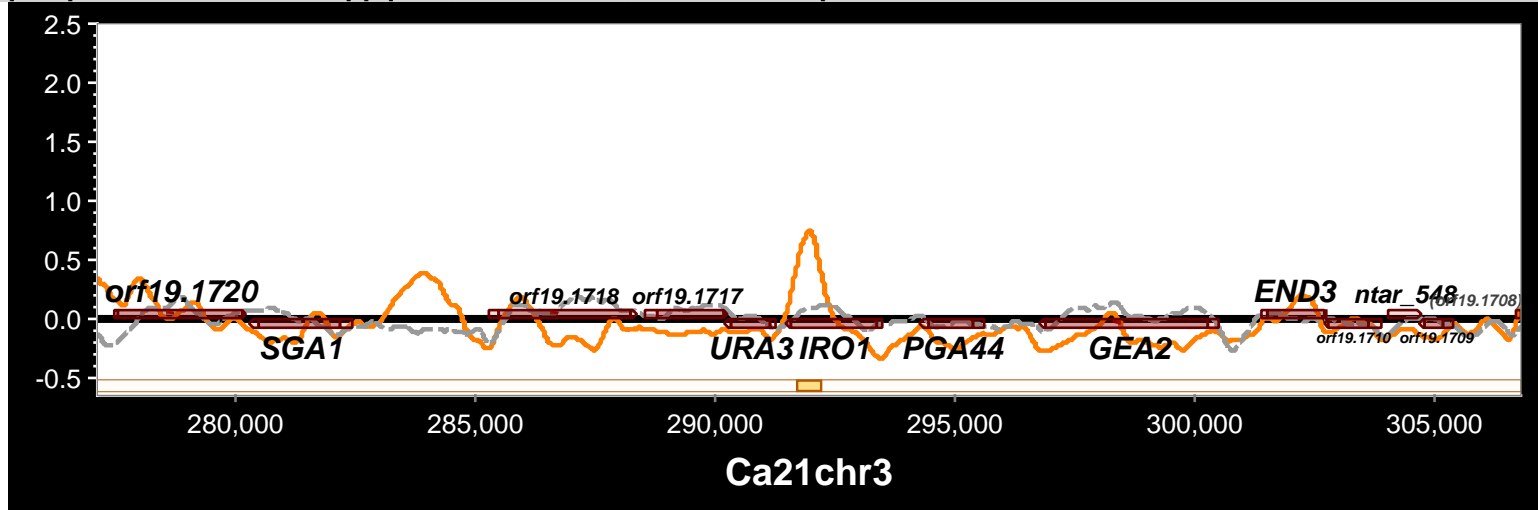

[0.742] Ca21chr3:1131505-1161188 [+] [CDR1, DYN1, SAP3, RPL8B, orf19.6003]

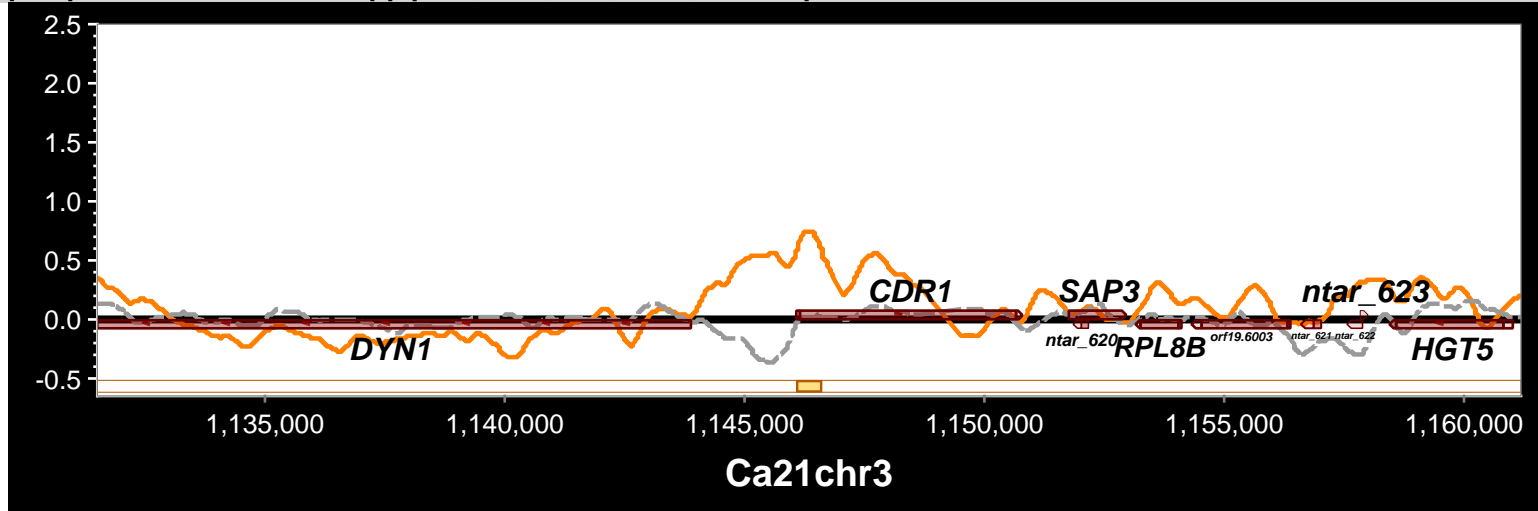

[0.738] Ca21chr5:1031350-1061033 [+] [PFK1, orf19.3968, CRH12, orf19.3965, orf19.3969]

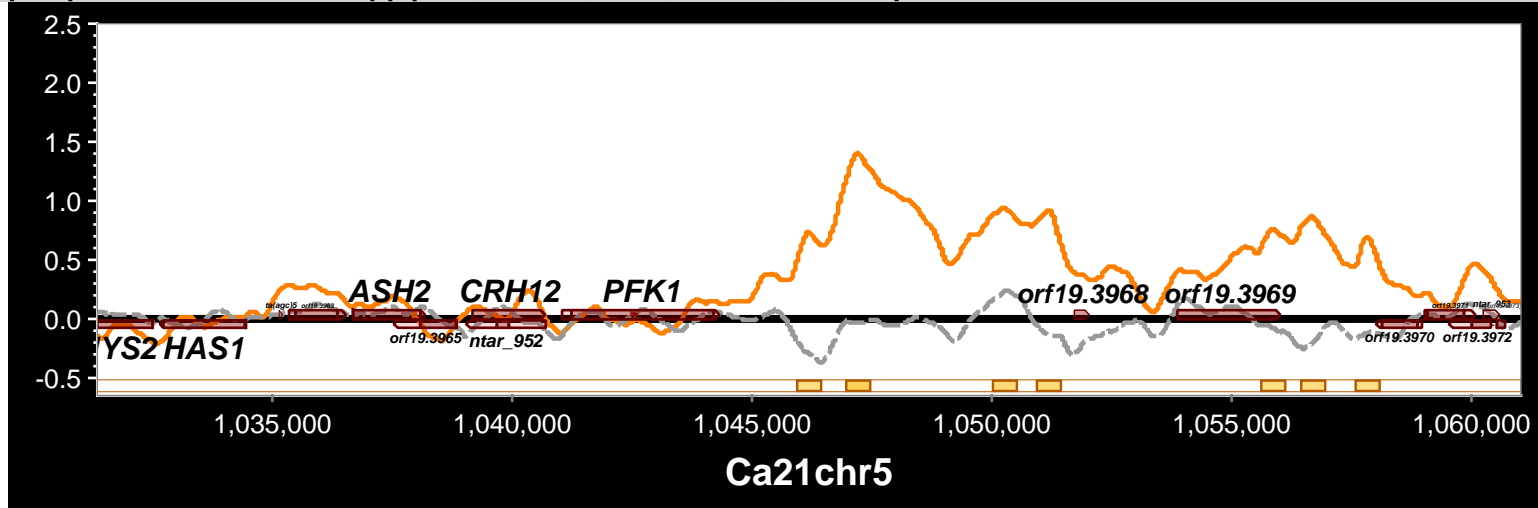

[0.737] Ca21chr3:693487-723170 [+] [orf19.334, FCY2, te(UUC)1, orf19.332.1, orf19.335]

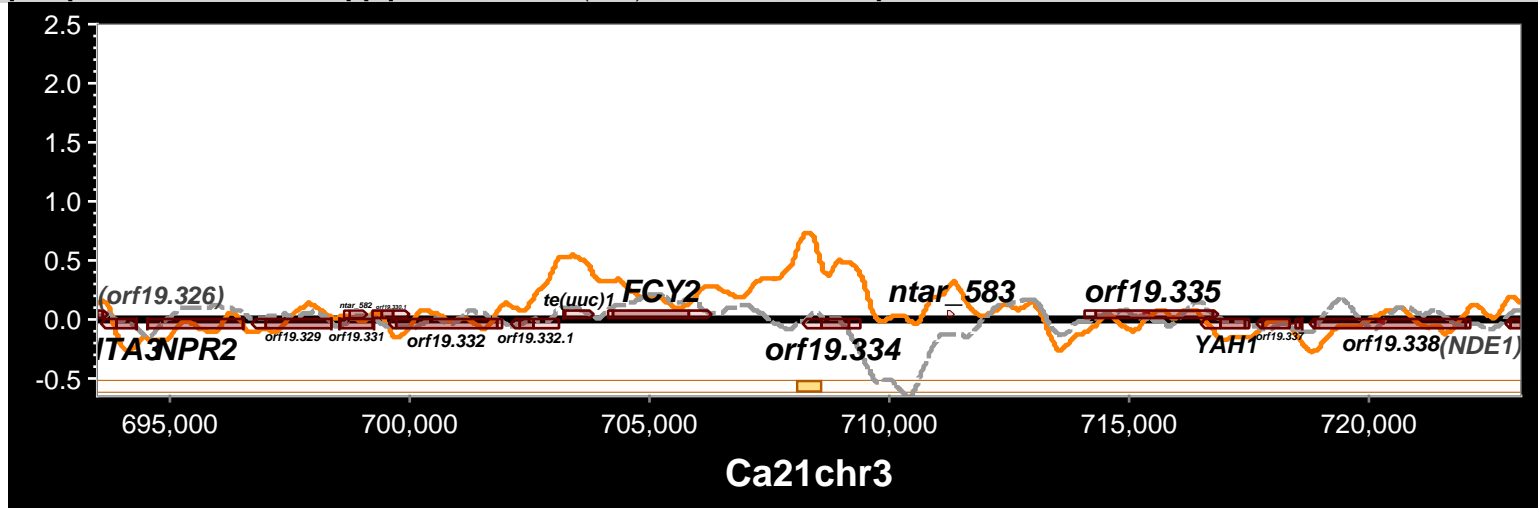

[0.737] Ca21chr3:1106426-1136109 [+] [WOR2, RHB1, MCA1, RPS19A, orf19.5991]

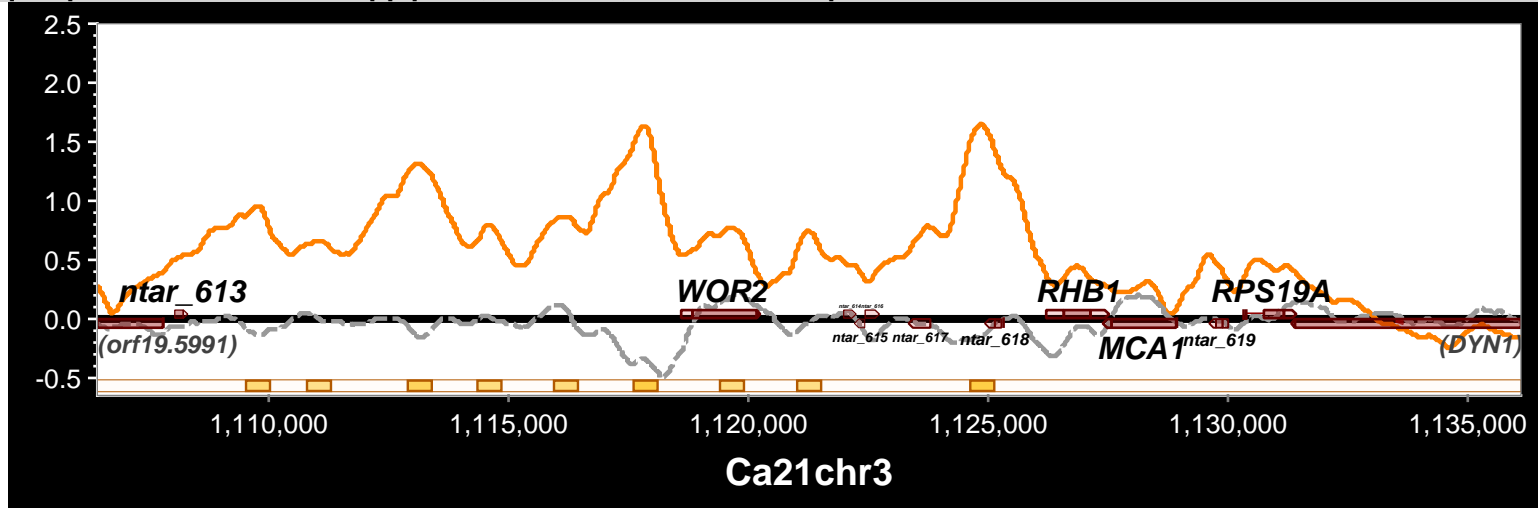

[0.736] Ca21chr3:1550371-1580054 [+] [FCR1, tw(CCA)2, orf19.6818, orf19.6816, orf19.6820]

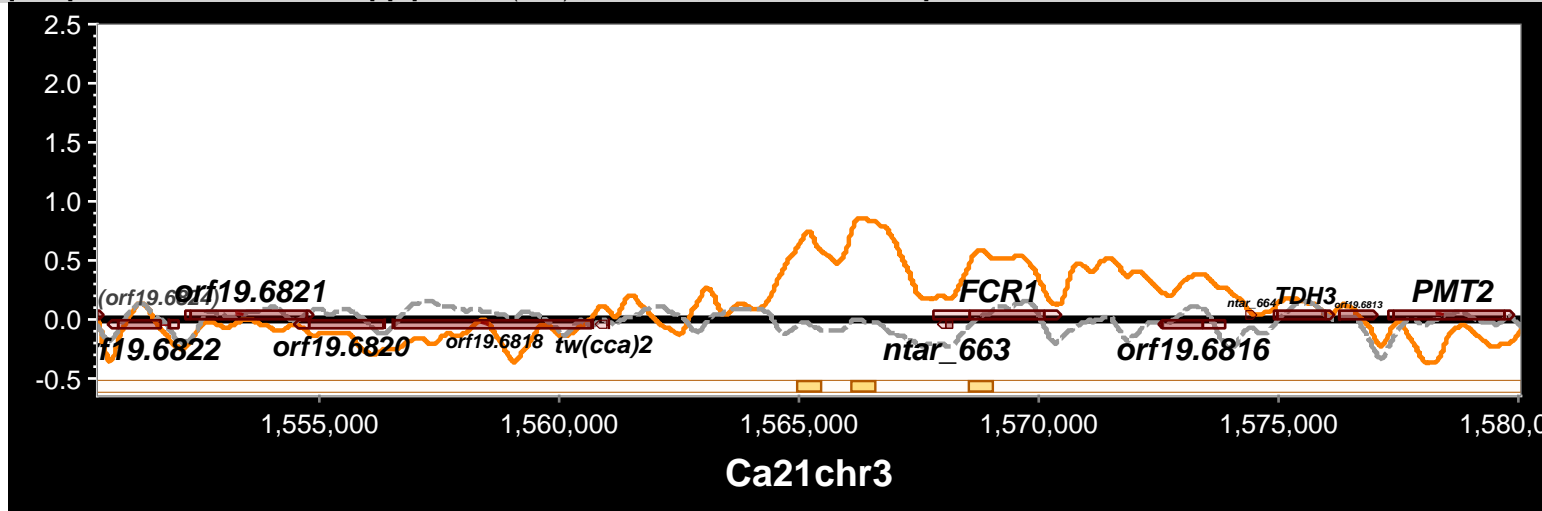

[0.736] Ca21chr4:1489766-1519449 [+] [orf19.3134, orf19.3135, GUT2, orf19.3136, orf19.3132]

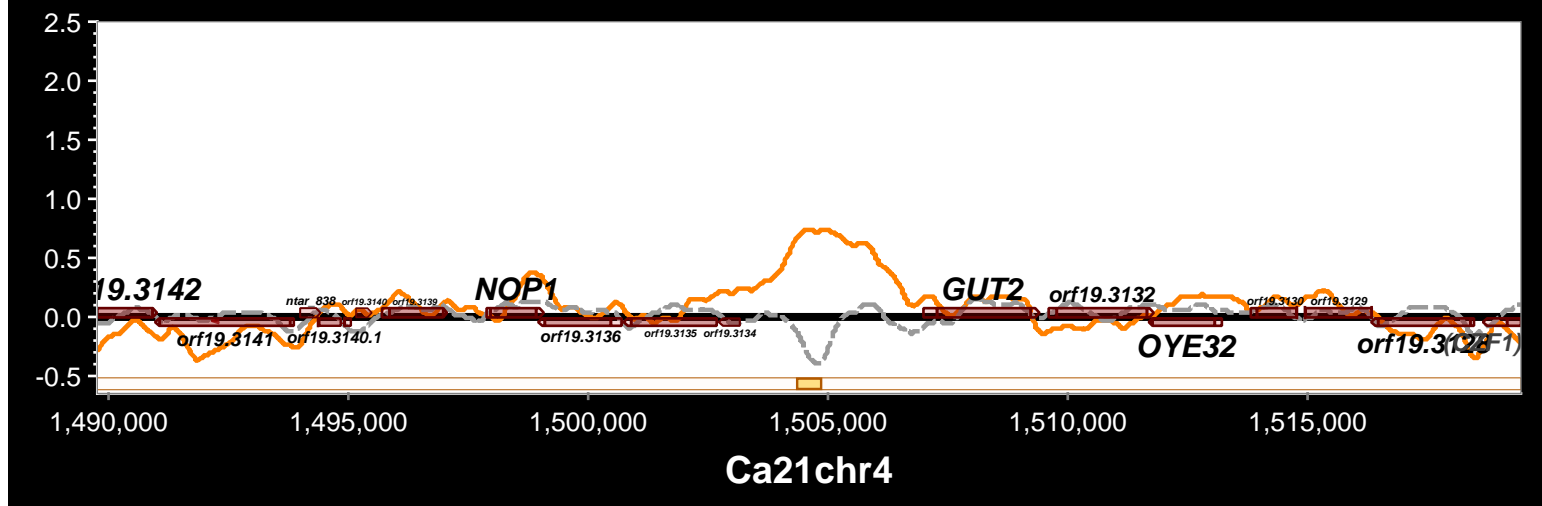

[0.736] Ca21chrR:1507185-1536868 [+] [URA2, CRZ2, SPT10, orf19.2362, orf19.2363]

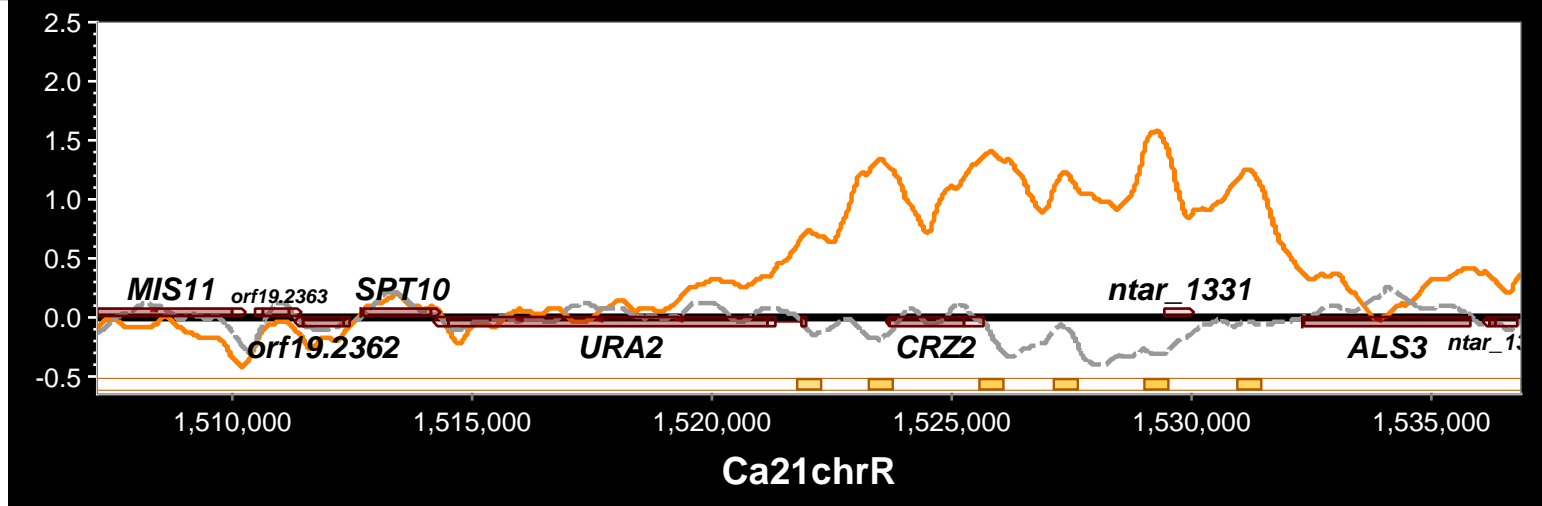

[0.732] Ca21chr1:17417-47100 [+] [RPL16A, orf19.6084, orf19.6083, LEU4, orf19.6090]

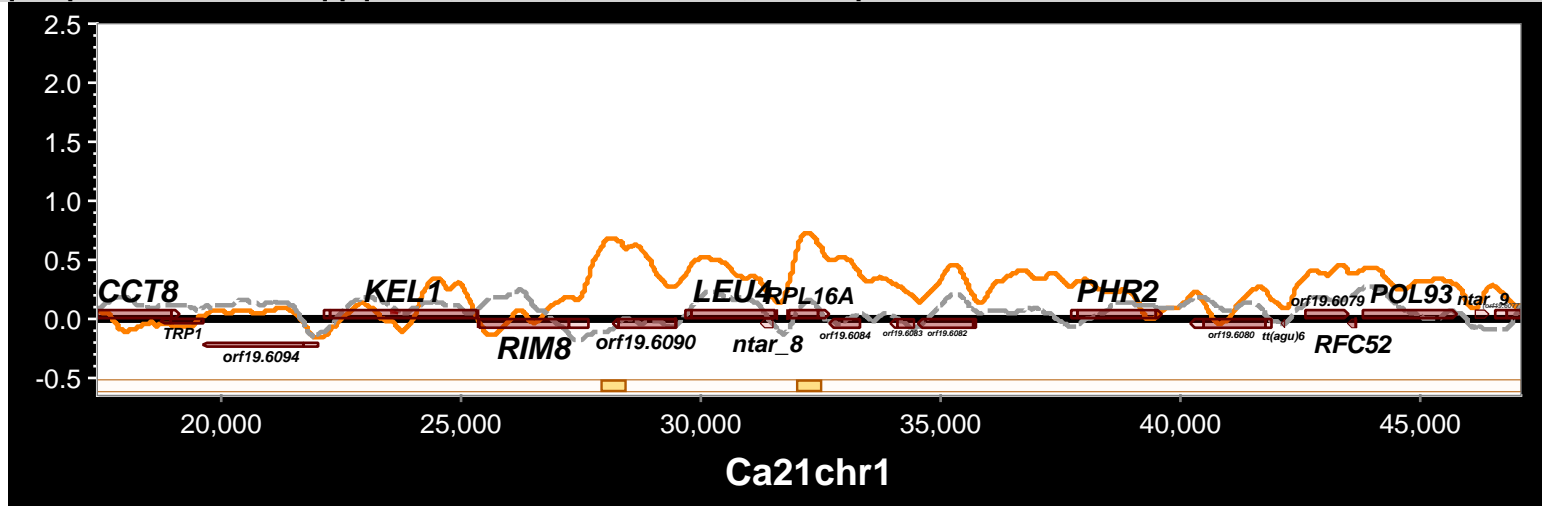

[0.727] Ca21chr1:1508281-1537964 [+] [GAP4, TAF145, orf19.6194, orf19.6195, orf19.4455]

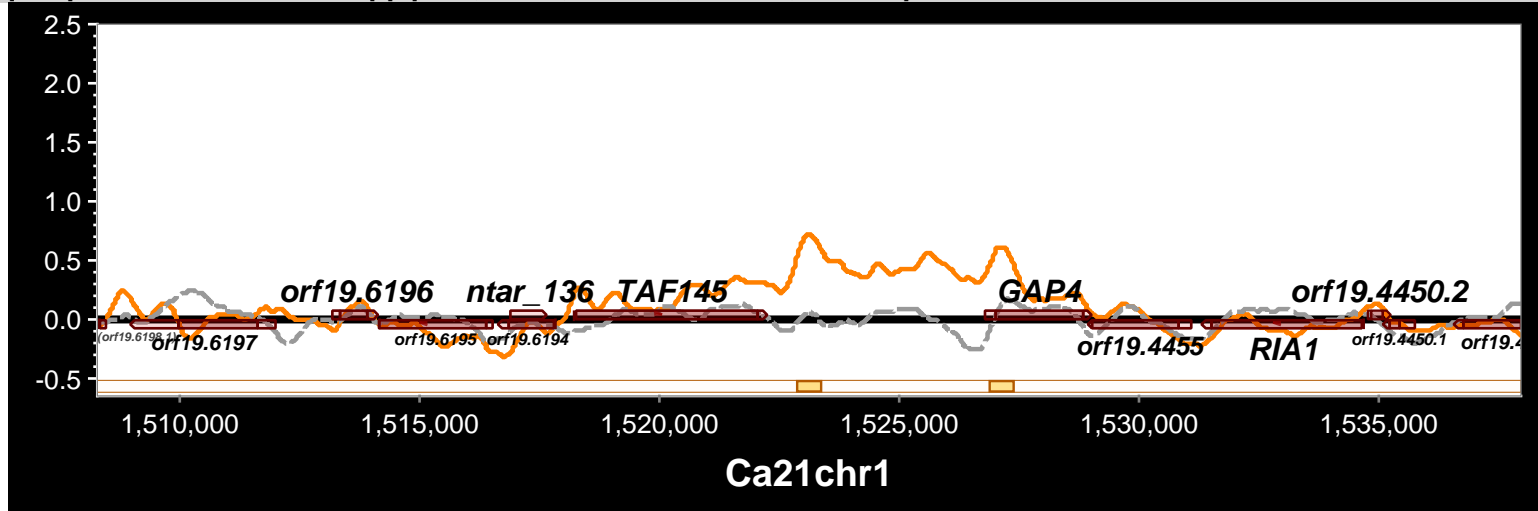

[0.726] Ca21chr4:1440595-1470278 [+] [MNN4, XUT1, CSO99, IFF5, CDC68]

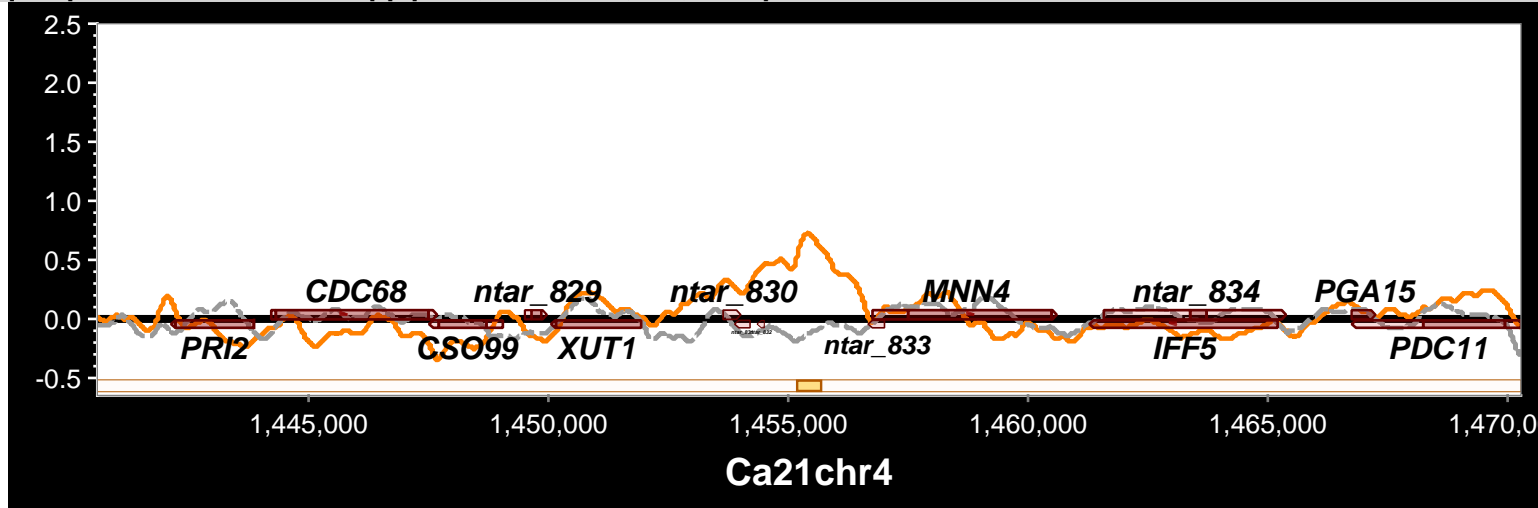

[0.722] Ca21chr3:1653979-1683662 [+] [ECM29, UBI4, orf19.6770, orf19.6769, orf19.6766]

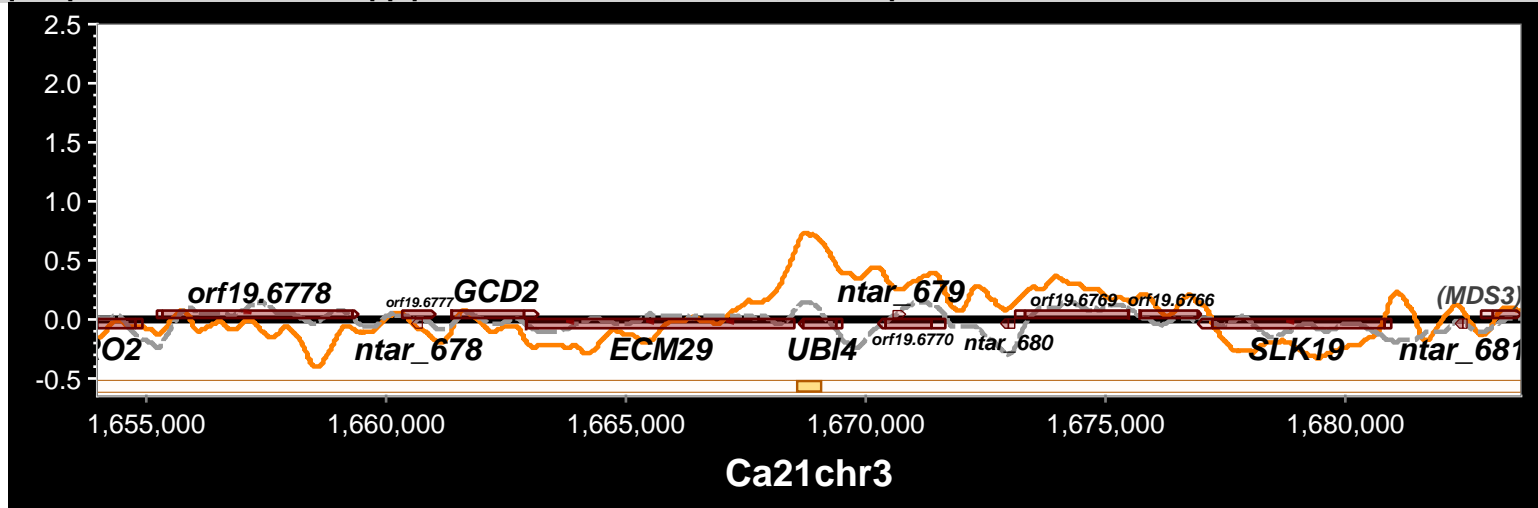

[0.722] Ca21chrR:2090320-2120003 [+] [DEF1, YTA6, FGR46, orf19.7556, orf19.7554]

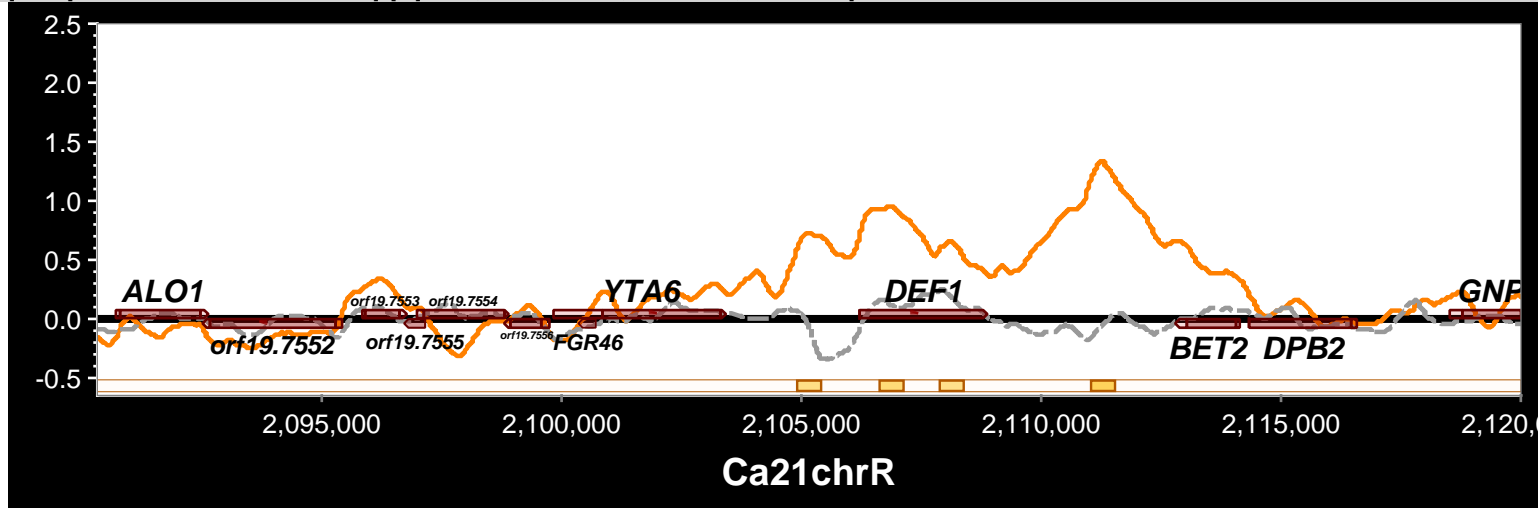

[0.719] Ca21chr5:625636-655319 [+] [GRP2, orf19.4310, YNK1, orf19.4312, HSL1]

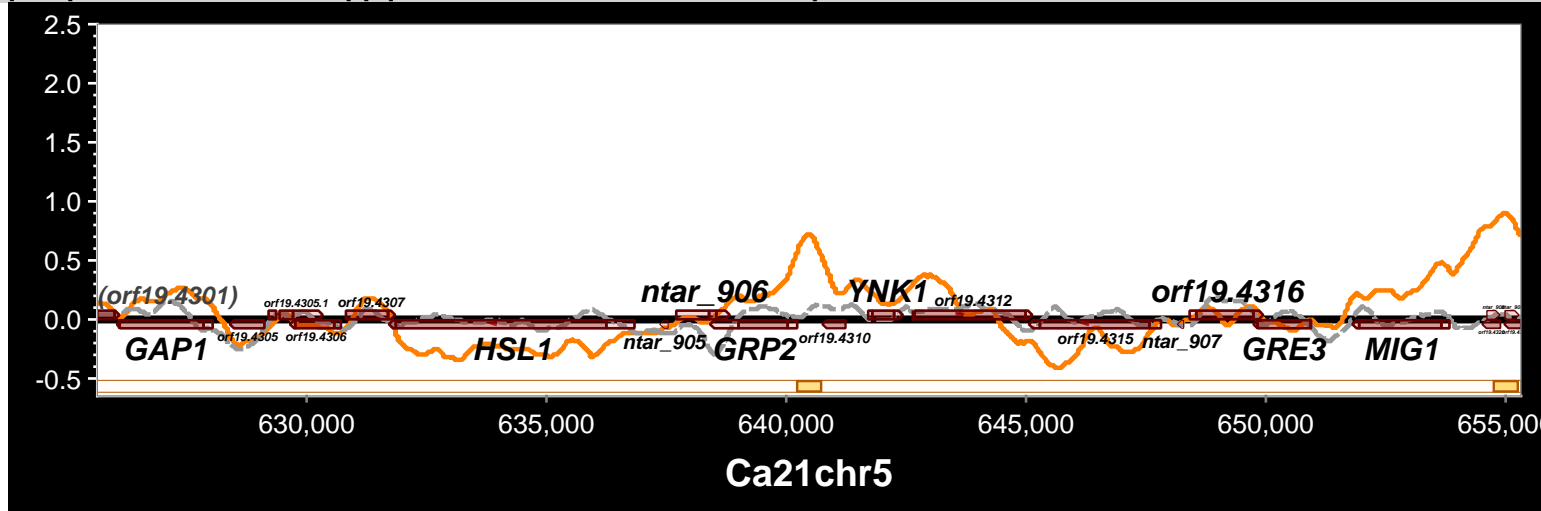

[0.713] Ca21chrR:588648-618331 [+] [RFG1, orf19.2825, orf19.2826, orf19.2827]

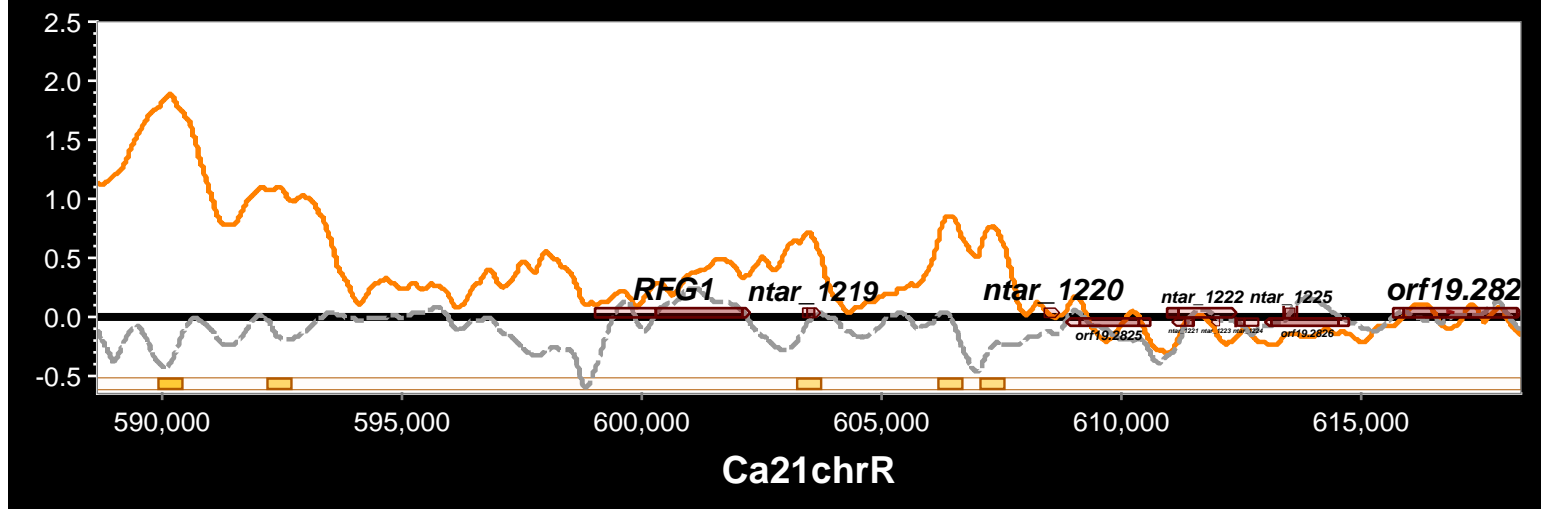

[0.712] Ca21chr1:1556712-1586395 [+] [tl(AAG)2, RME1, CEN1, orf19.4437, orf19.4439]

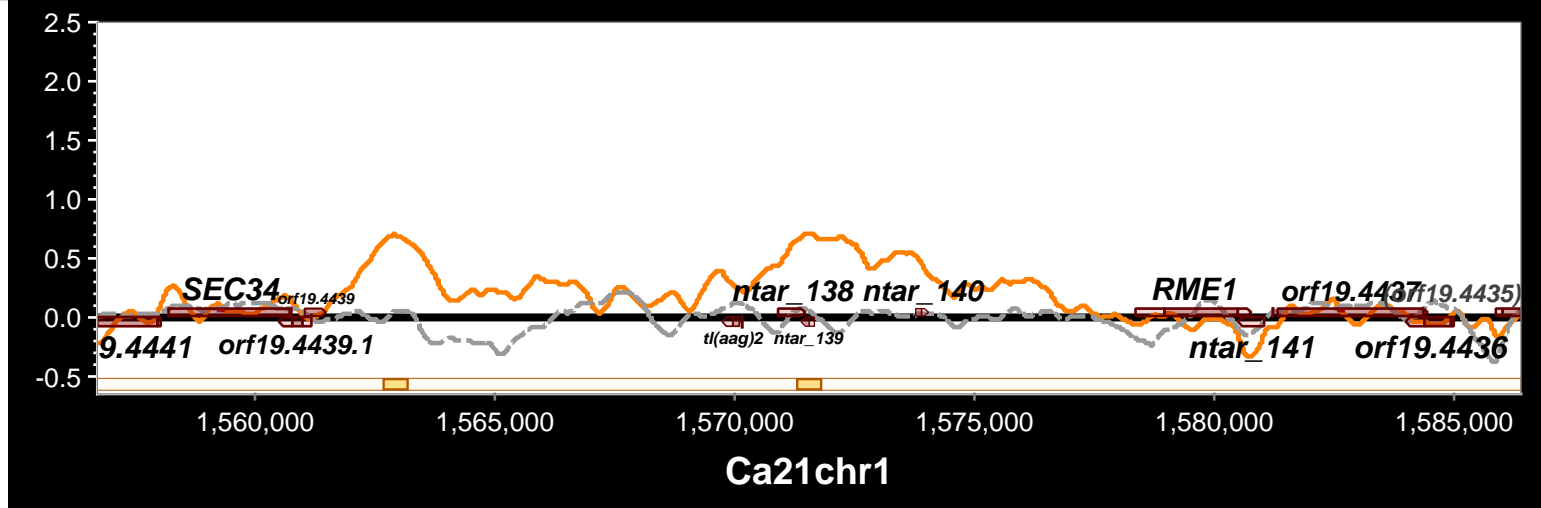

[0.71] Ca21chr5:415352-445035 [+] [GIS2, orf19.3181.1, orf19.3180, orf19.3183, orf19.3178]

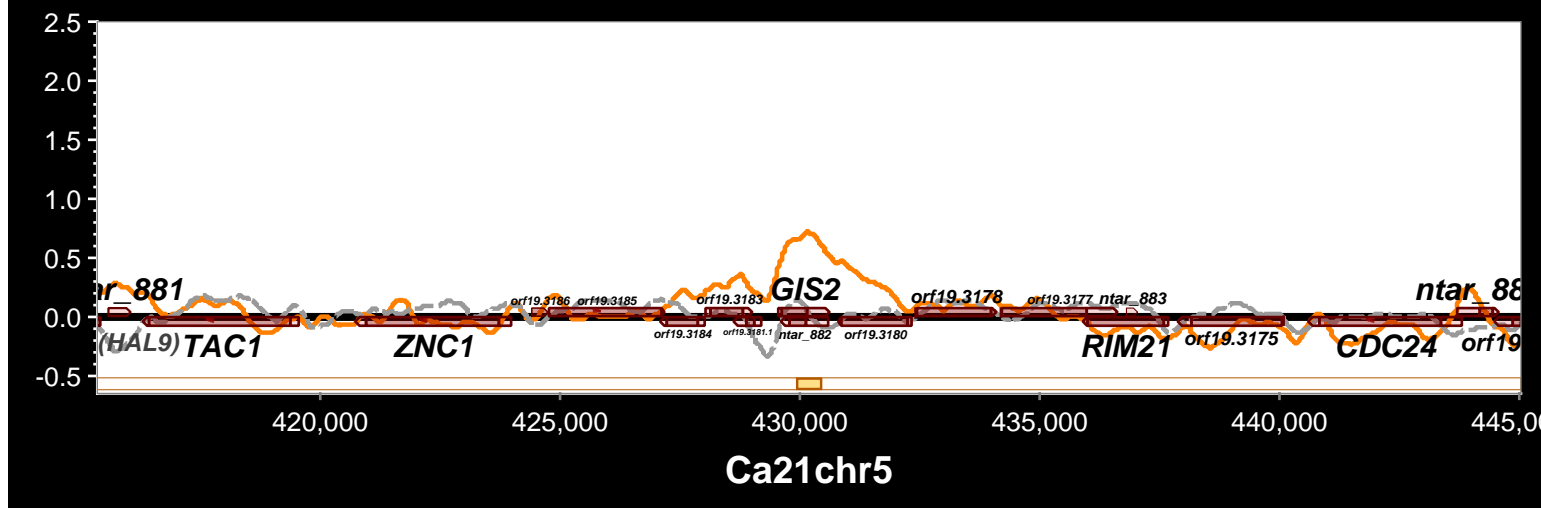

[0.706] Ca21chr7:97207-126890 [+] [orf19.7054, GAC1, orf19.7056, orf19.7057, orf19.7058]

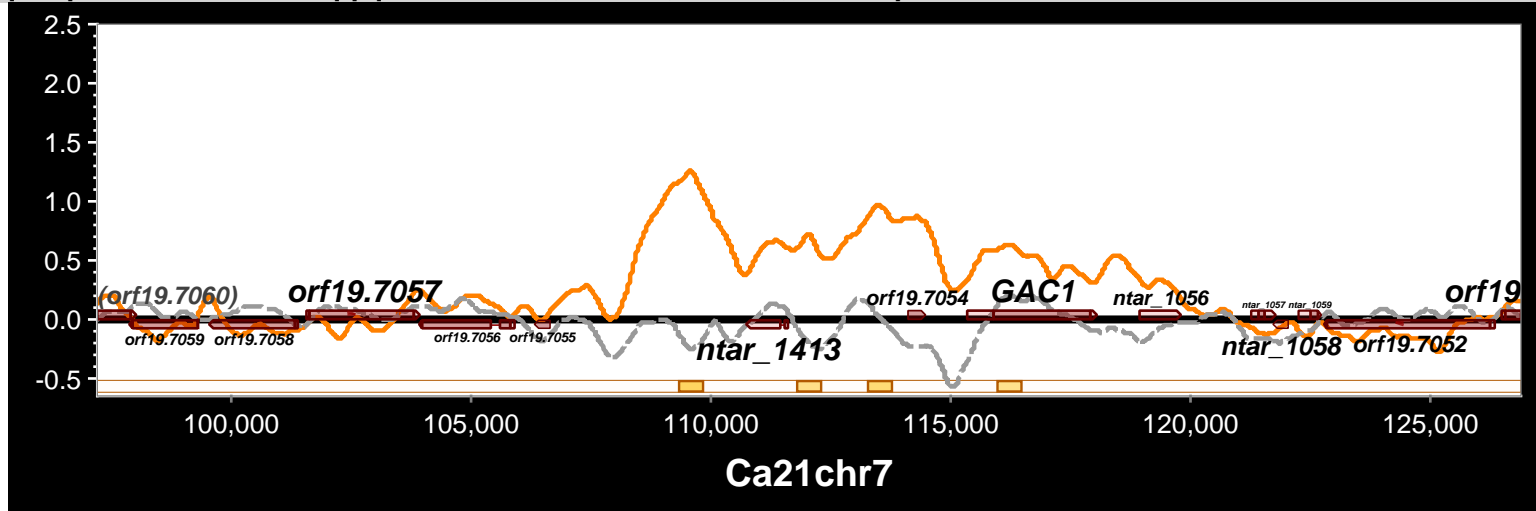

[0.705] Ca21chr1:806457-836140 [+] [orf19.4461, orf19.4463, SEN15, orf19.4459, orf19.4465]

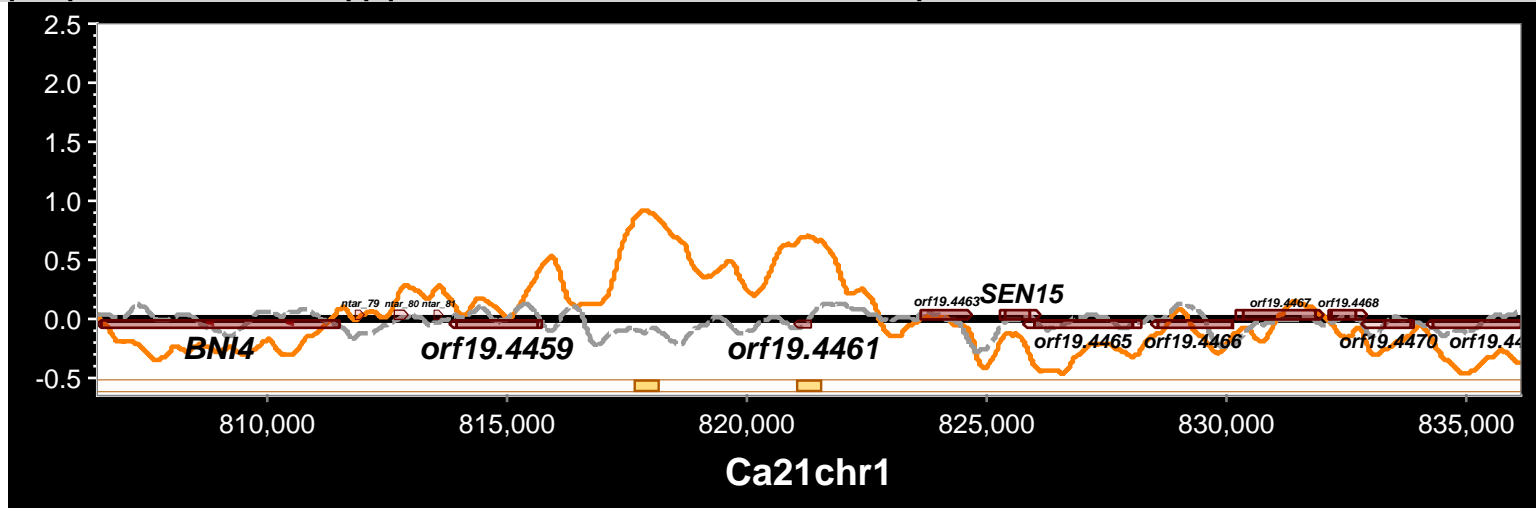

[0.703] Ca21chr7:348568-378251 [+] [orf19.6556, orf19.6557, orf19.6558, orf19.6555, orf19.6554]

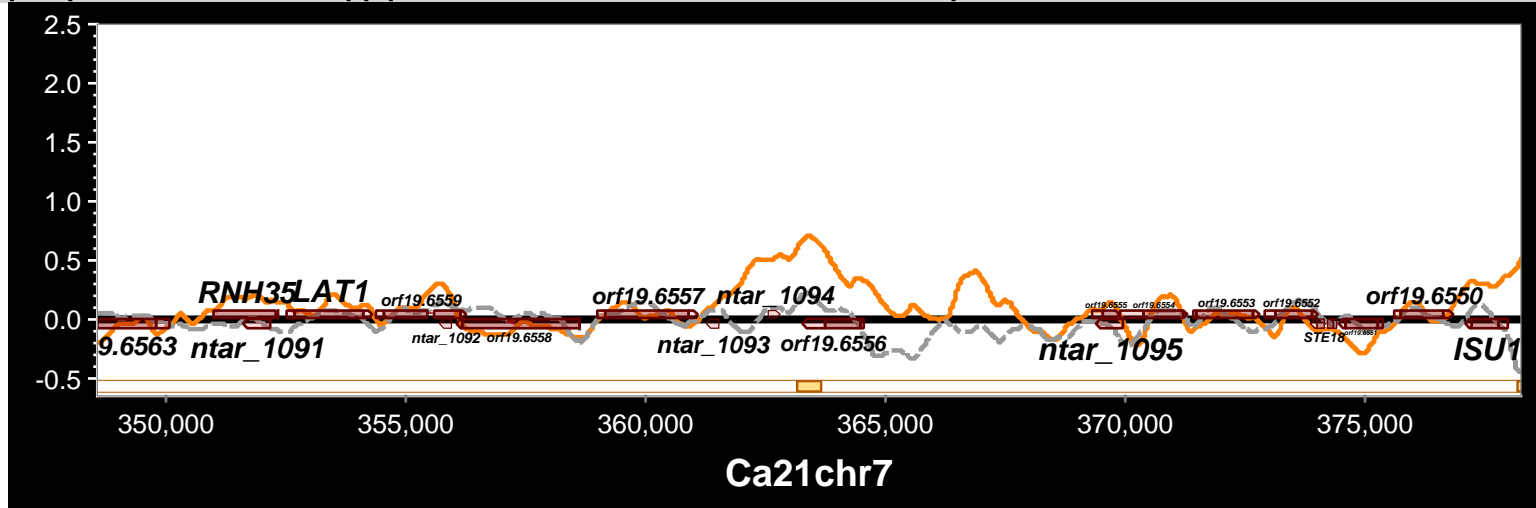

[0.702] Ca21chr1:1548090-1577773 [+] [CEN1, orf19.4439, orf19.4439.1, SEC34, orf19.4441]

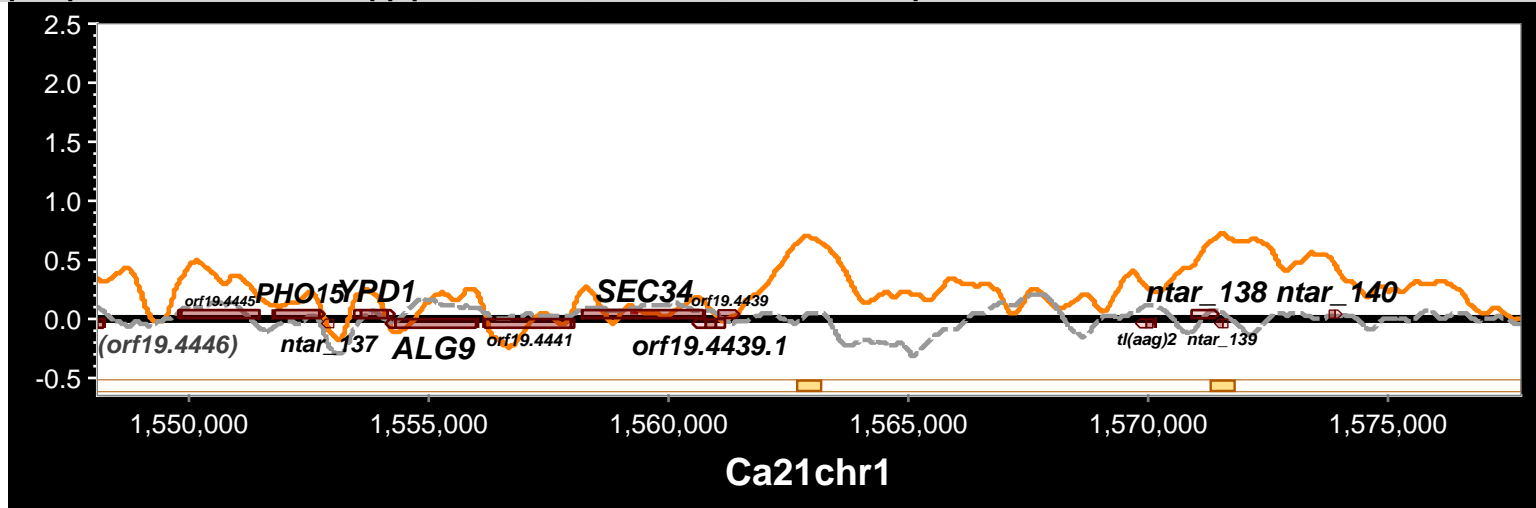

[0.698] Ca21chr5:1042995-1072678 [+] [orf19.3970, orf19.3971, orf19.3972, orf19.3973, orf19.3969]

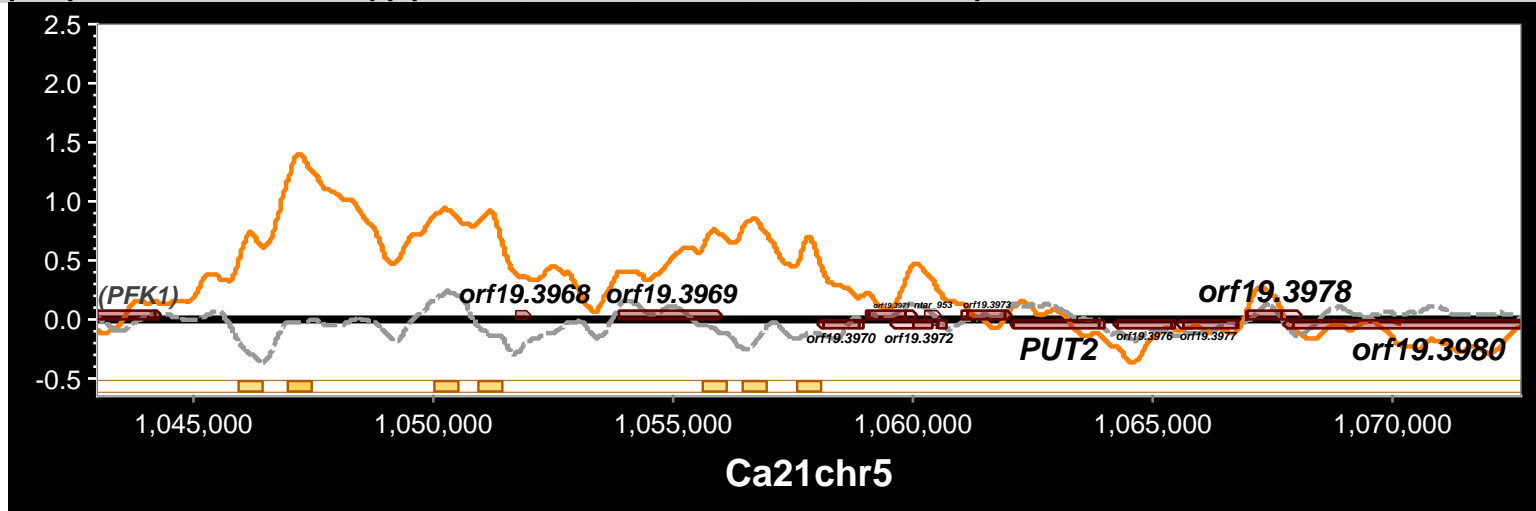

[0.696] Ca21chr2:2039235-2068918 [+] [MP65, orf19.1780, orf19.1778, orf19.1782, orf19.1777]

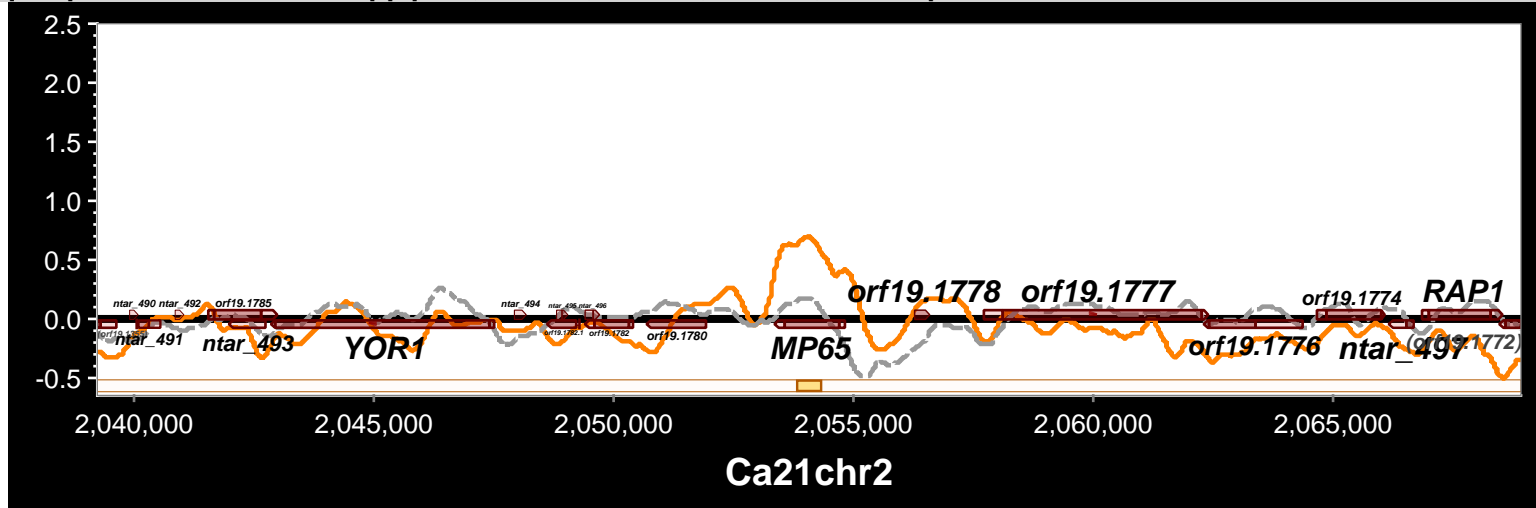

[0.696] Ca21chr6:75863-105546 [+] [FET3, orf19.4210, orf19.4209, FET99, RAD52]

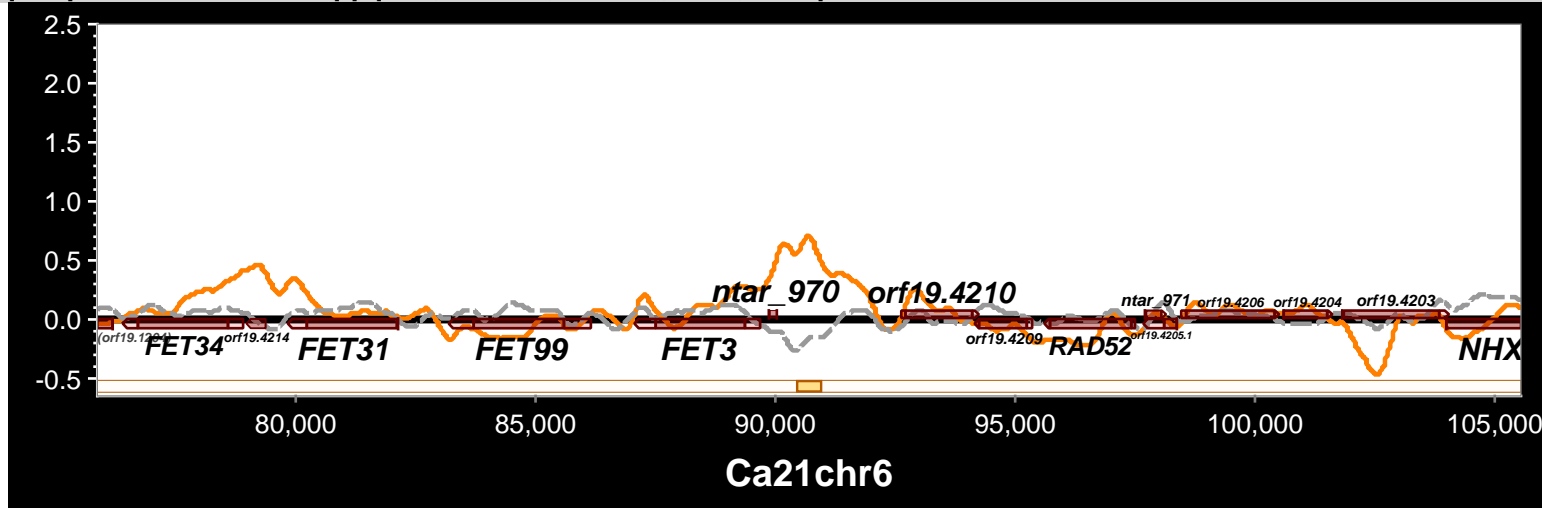

[0.695] Ca21chr5:236232-265915 [+] [orf19.1959, CLN3, CYC3, orf19.1956, orf19.1961]

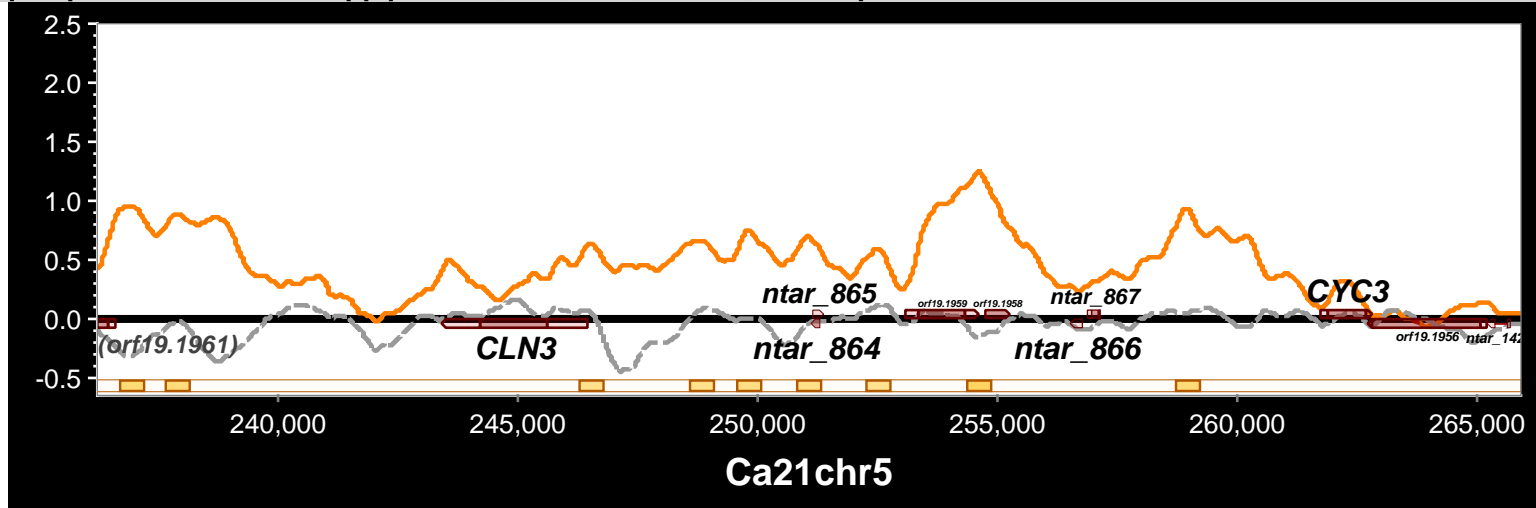

[0.694] Ca21chr3:928235-957918 [+] [orf19.5905, RPL19A, ADE2, RAX1, RAS2]

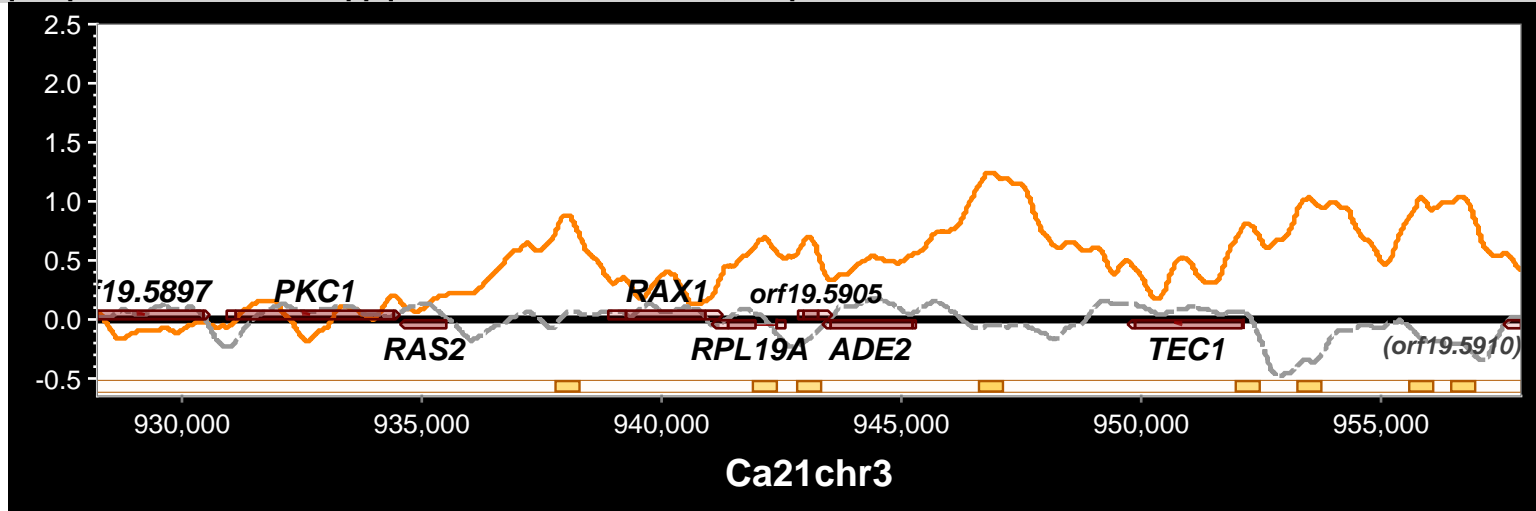

[0.689] Ca21chr2:1907651-1937334 [+] [RPL3, orf19.1600, orf19.1599, CEN2, ERG24]

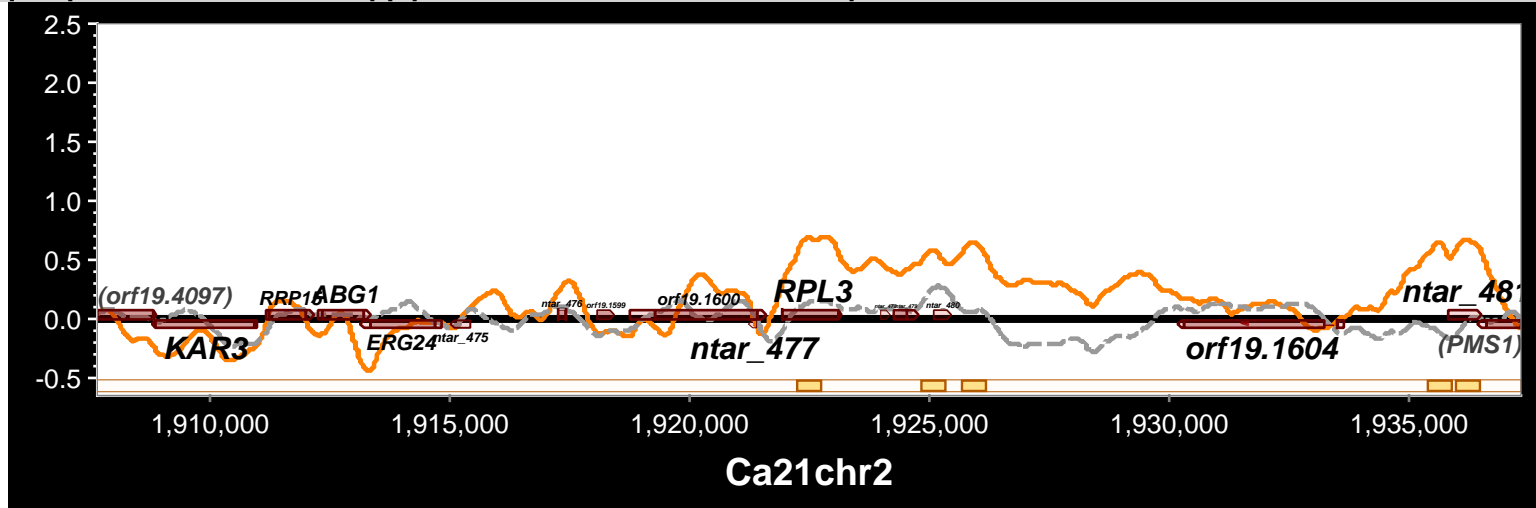

[0.688] Ca21chr4:1510946-1540629 [+] [CCT6, orf19.3125, CZF1, orf19.3124, orf19.3123.2]

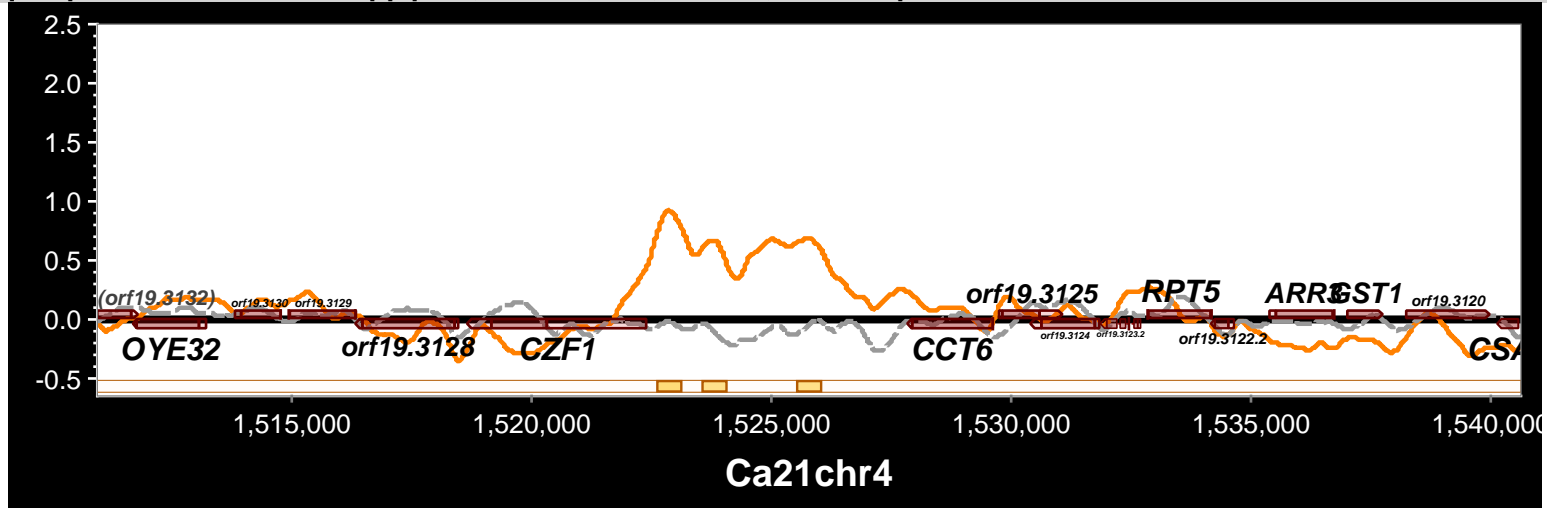

[0.685] Ca21chr2:310369-340052 [+] [tL(CAA)1, orf19.1488, MSB2, orf19.1490.1, orf19.1486]

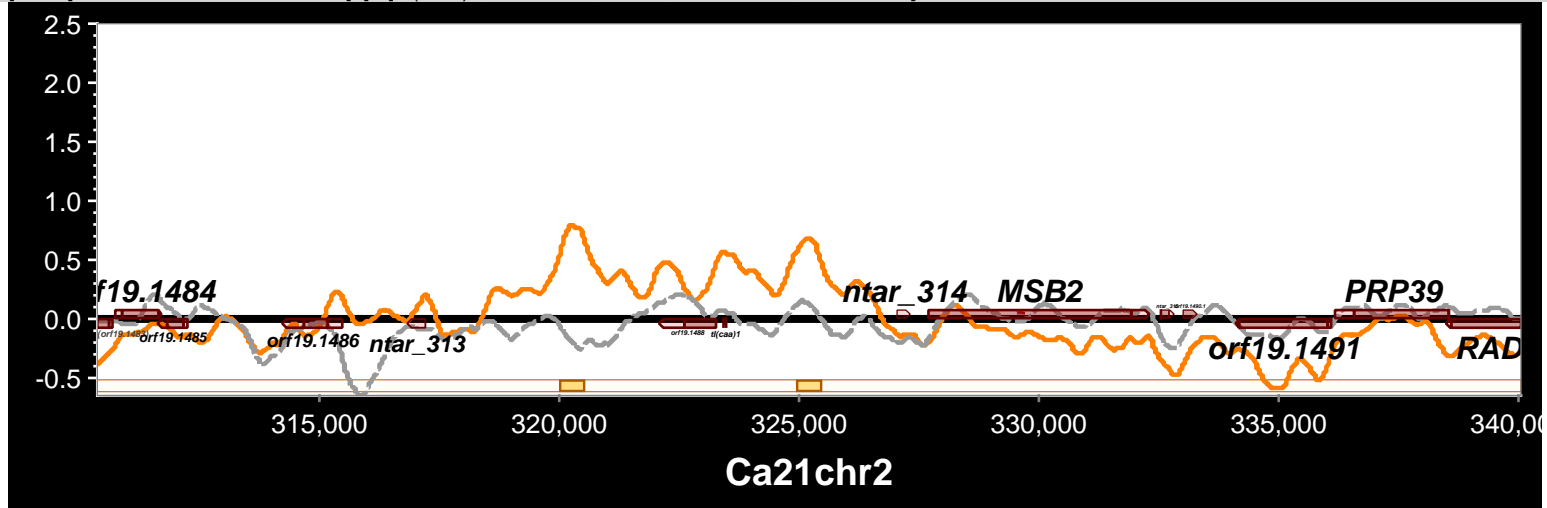



[0.684] Ca21chr7:906942-936625 [+] [NRG1, orf19.7149, orf19.7151, TPO2, orf19.7144]

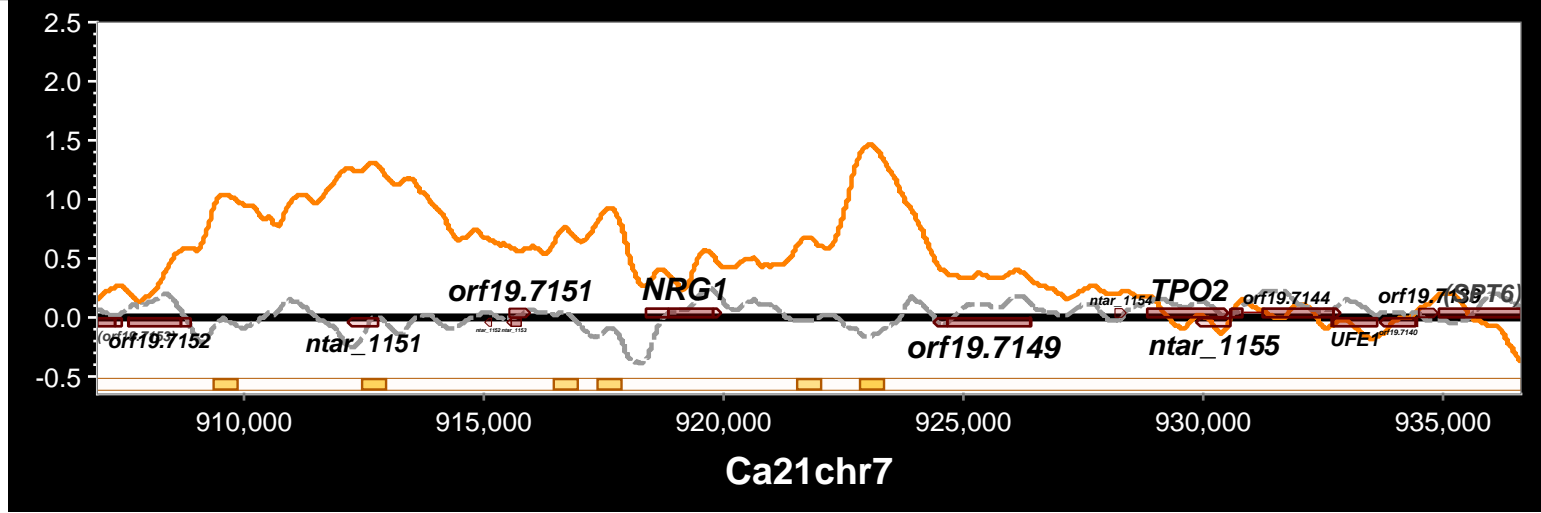

[0.684] Ca21chrR:1618835-1648518 [+] [ECM22, orf19.2624, orf19.2625, YPT31, RGD3]

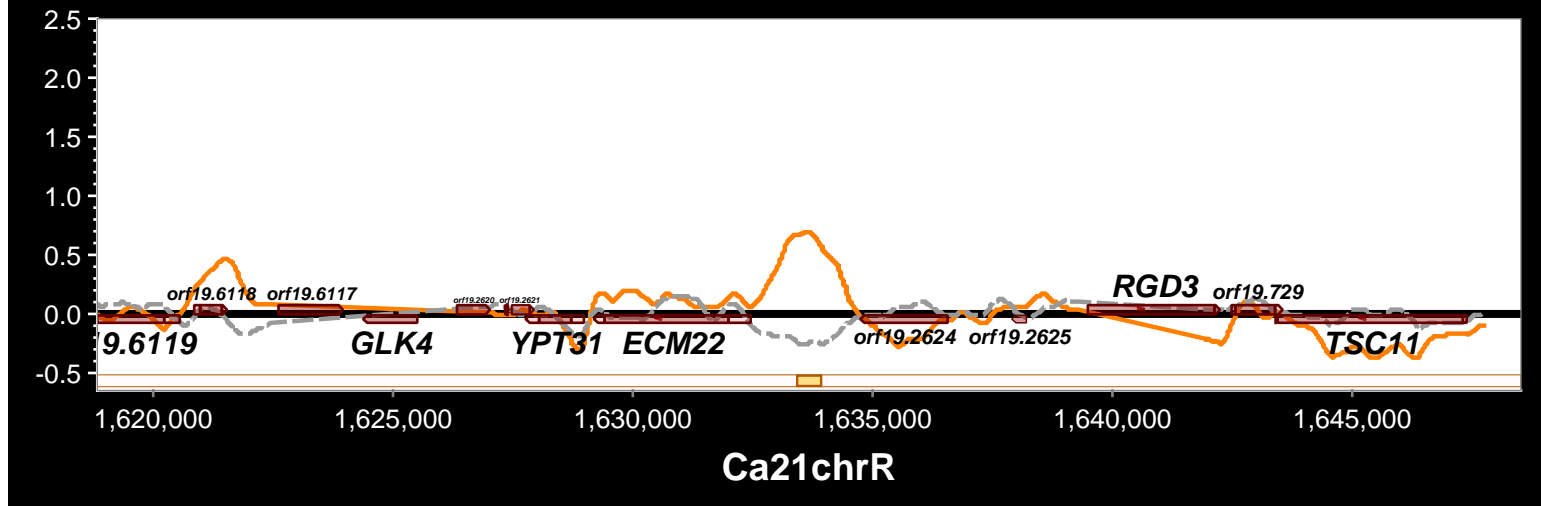

[0.683] Ca21chr4:848409-878092 [+] [orf19.5308, JEN2, orf19.5311, RHD3, orf19.5304]

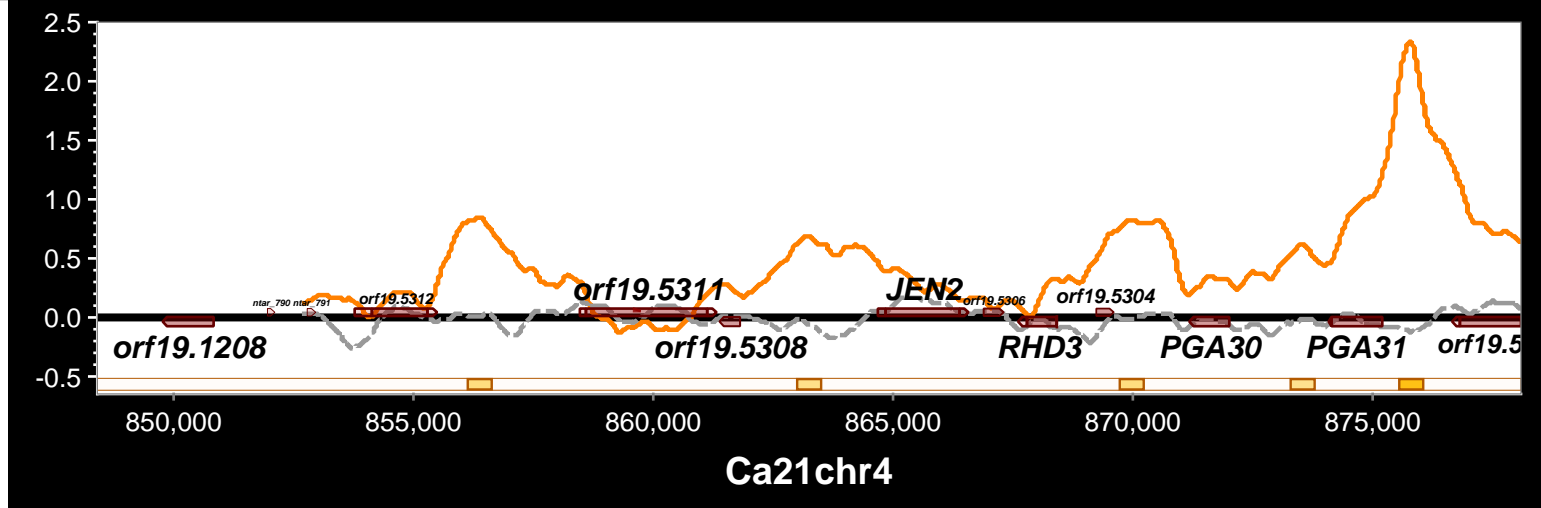

[0.683] Ca21chr5:101489-131172 [+] [AGA1, orf19.934, orf19.933, orf19.932, orf19.936]

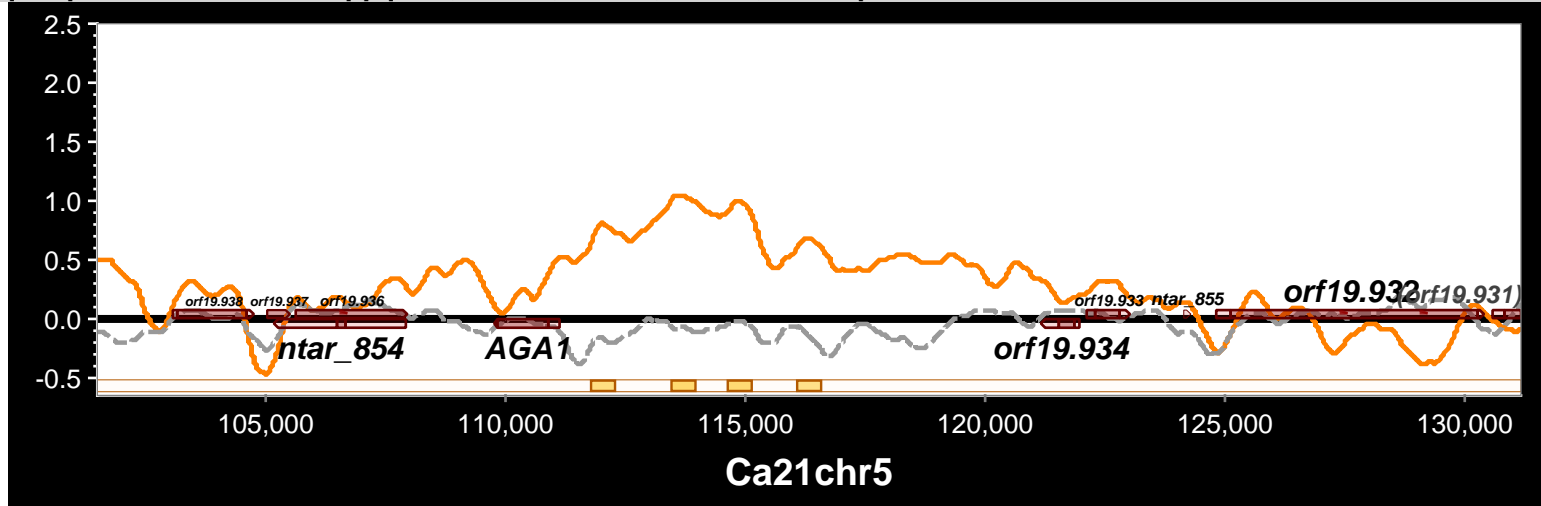

[0.683] Ca21chrR:1983572-2013255 [+] [orf19.7337, orf19.7336, BGL22, orf19.7340, PRE8]

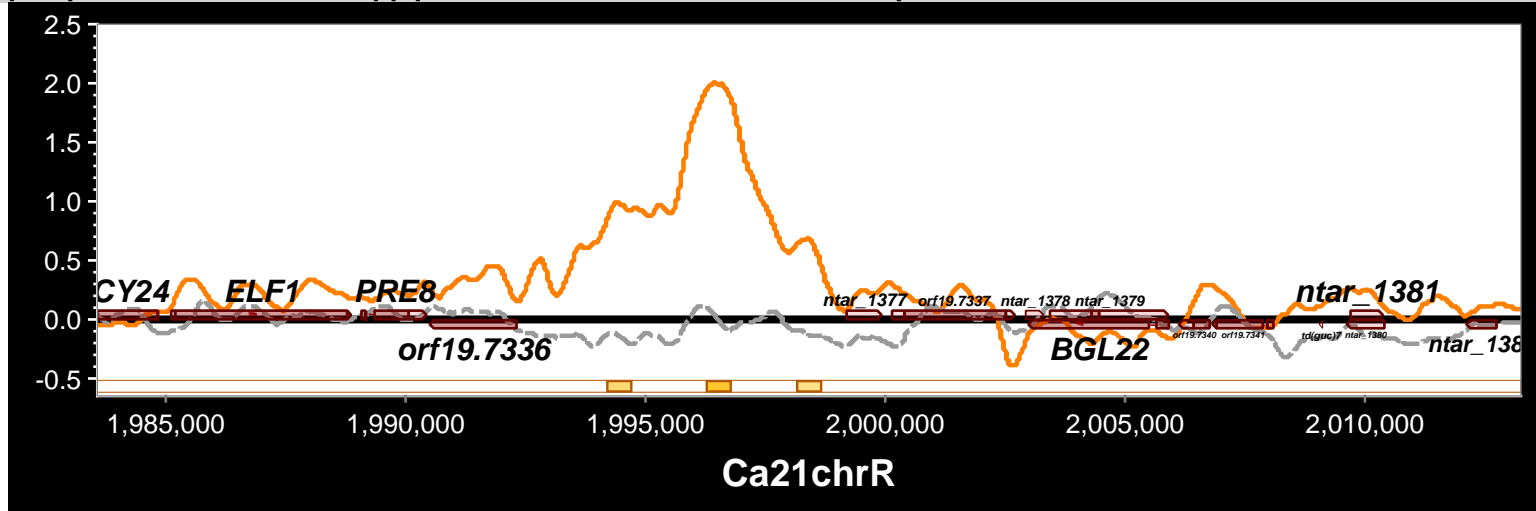

[0.682] Ca21chr1:13339-43022 [+] [RIM8, orf19.6090, LEU4, RPL16A, orf19.6084]

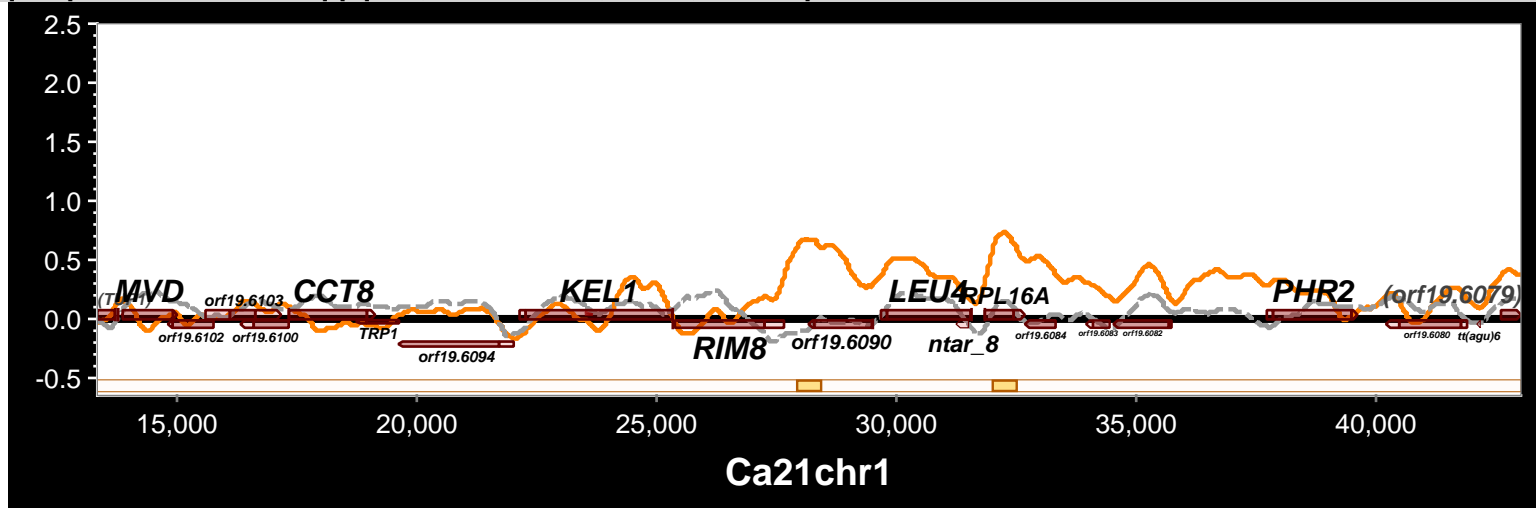

[0.682] Ca21chr3:927312-956995 [+] [RPL19A, orf19.5905, RAX1, ADE2, RAS2]

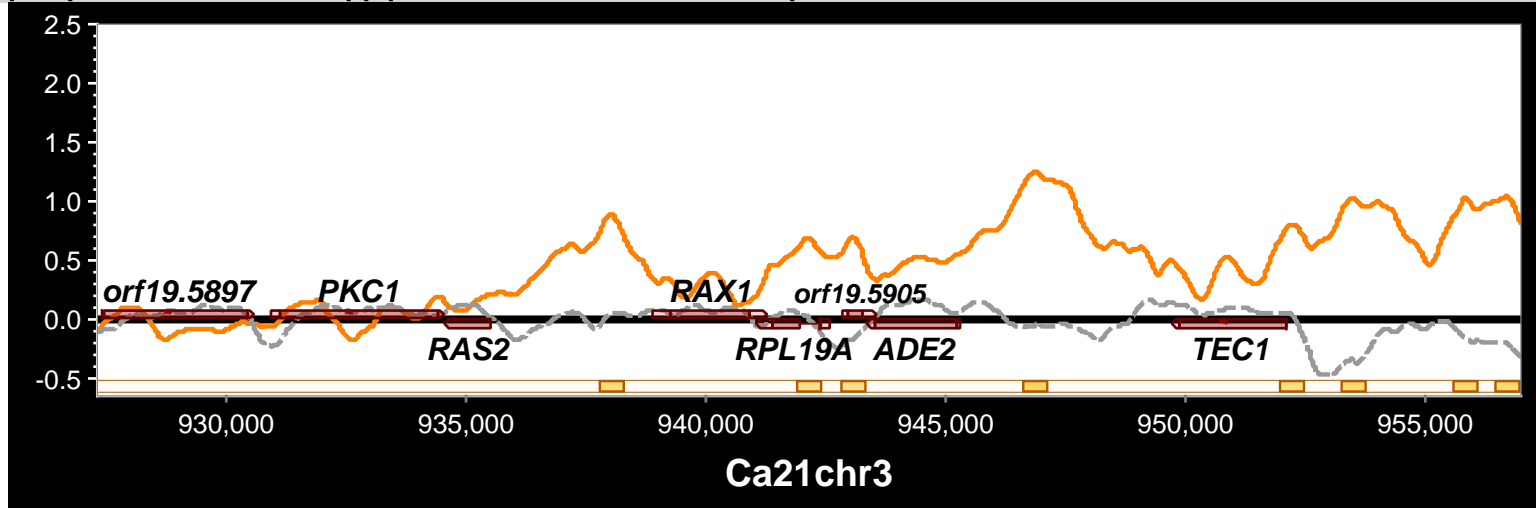

[0.679] Ca21chr2:769180-798863 [+] [orf19.850, orf19.849, orf19.851, tR(UCU)2, tF(GAA)2]

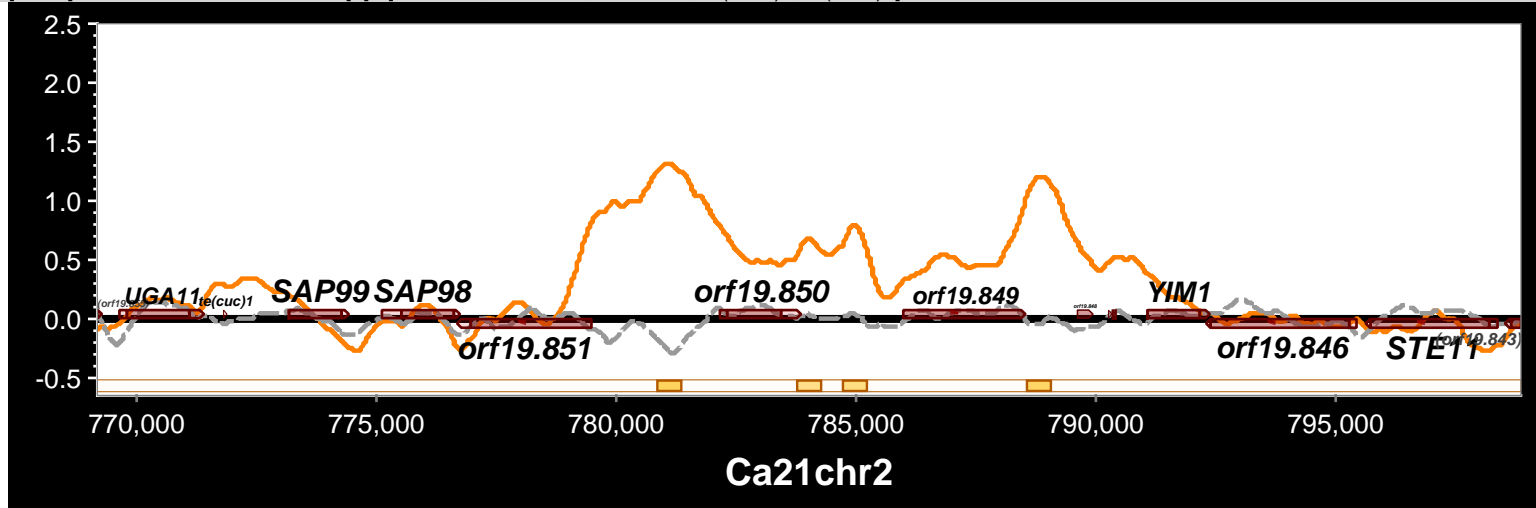

[0.678] Ca21chr4:1149775-1179458 [+] [orf19.1792, orf19.1793, orf19.1791, LYS1, orf19.1794]

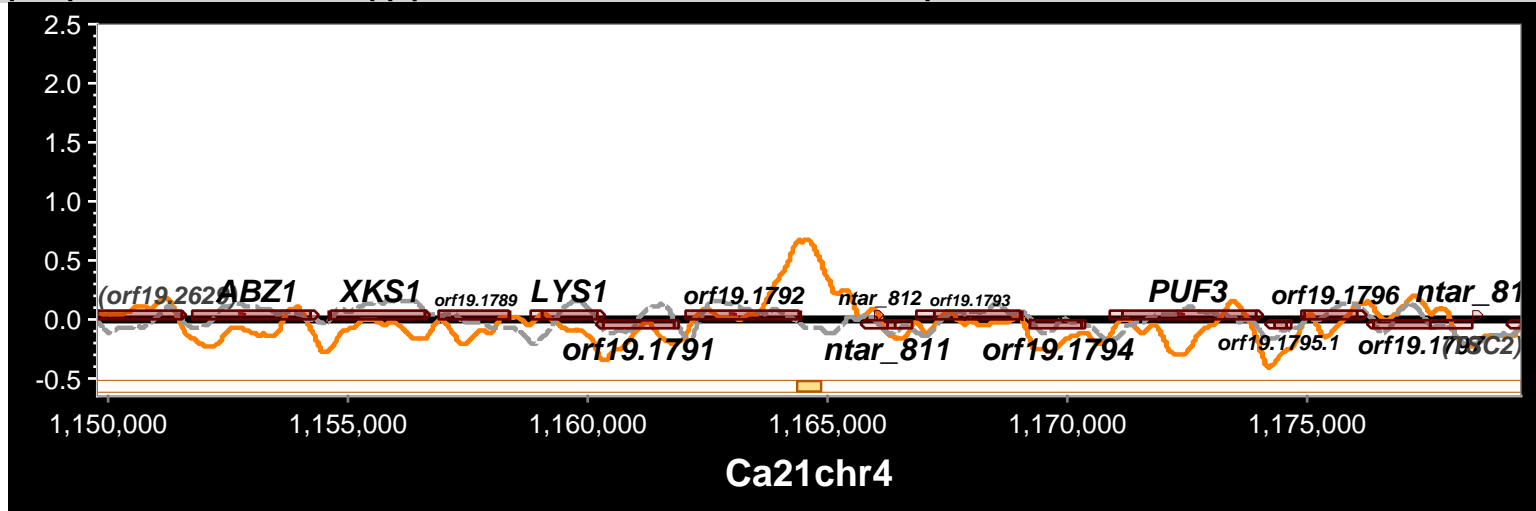

[0.674] Ca21chrR:1463064-1492747 [+] [ALG6, orf19.1842, tS(AGA)2, orf19.1844, orf19.1841]

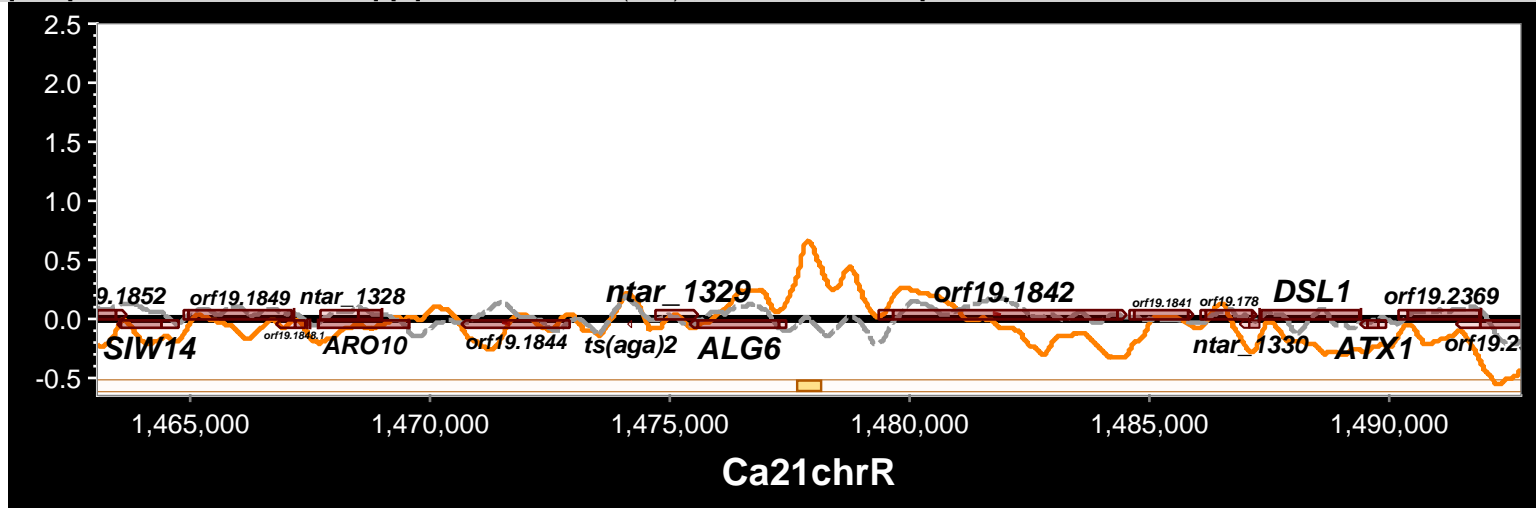

[0.672] Ca21chrR:1180282-1209965 [+] [orf19.5843, tC(GCA)1, tC(GCA)2, orf19.5844, orf19.6653]

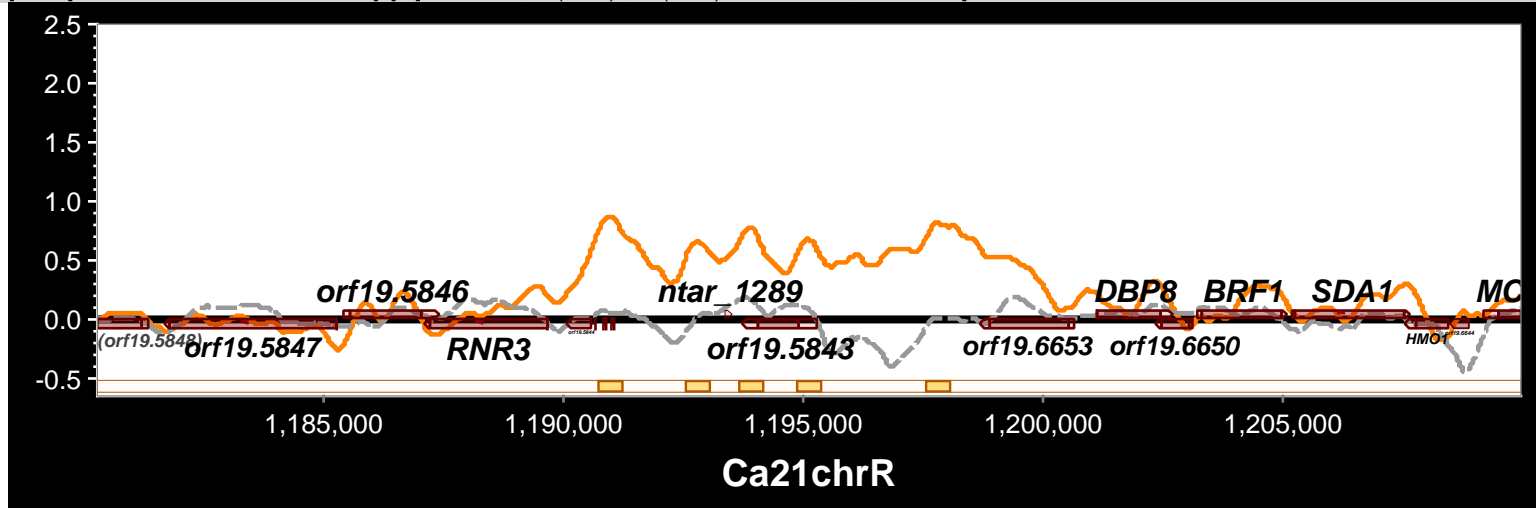

[0.671] Ca21chr1:279190-308873 [+] [orf19.3335, RPS21, orf19.3337, orf19.3333, orf19.3338]

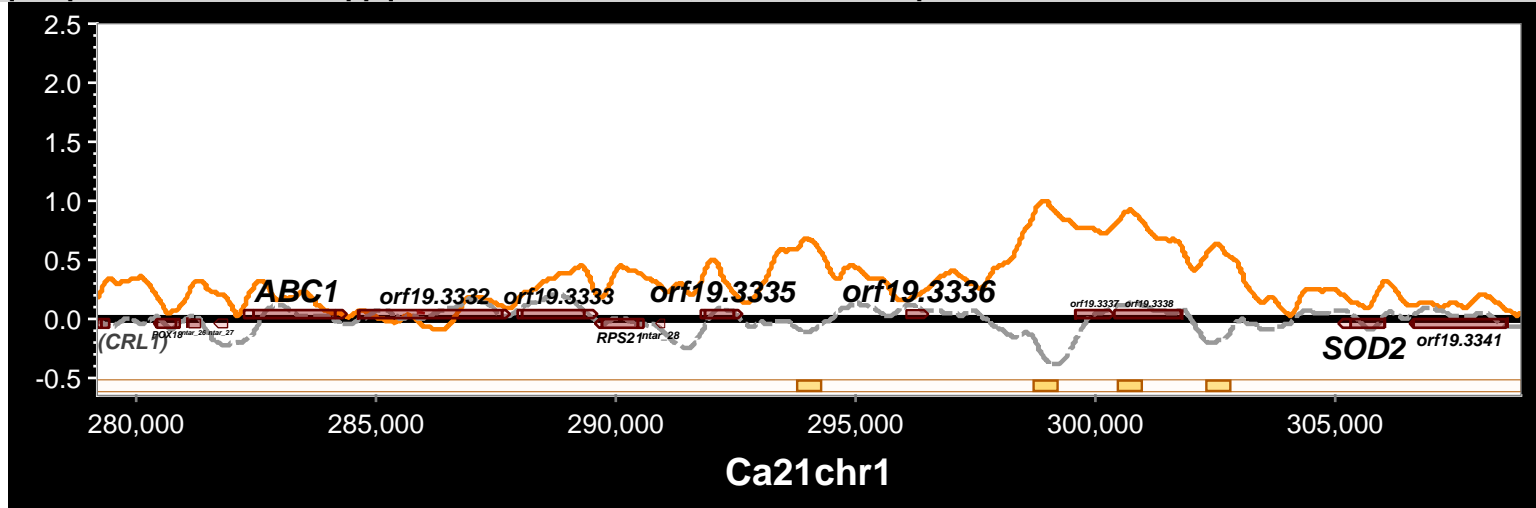

[0.671] Ca21chr4:1508973-1538656 [+] [CZF1, orf19.3128, CCT6, orf19.3125, orf19.3124]

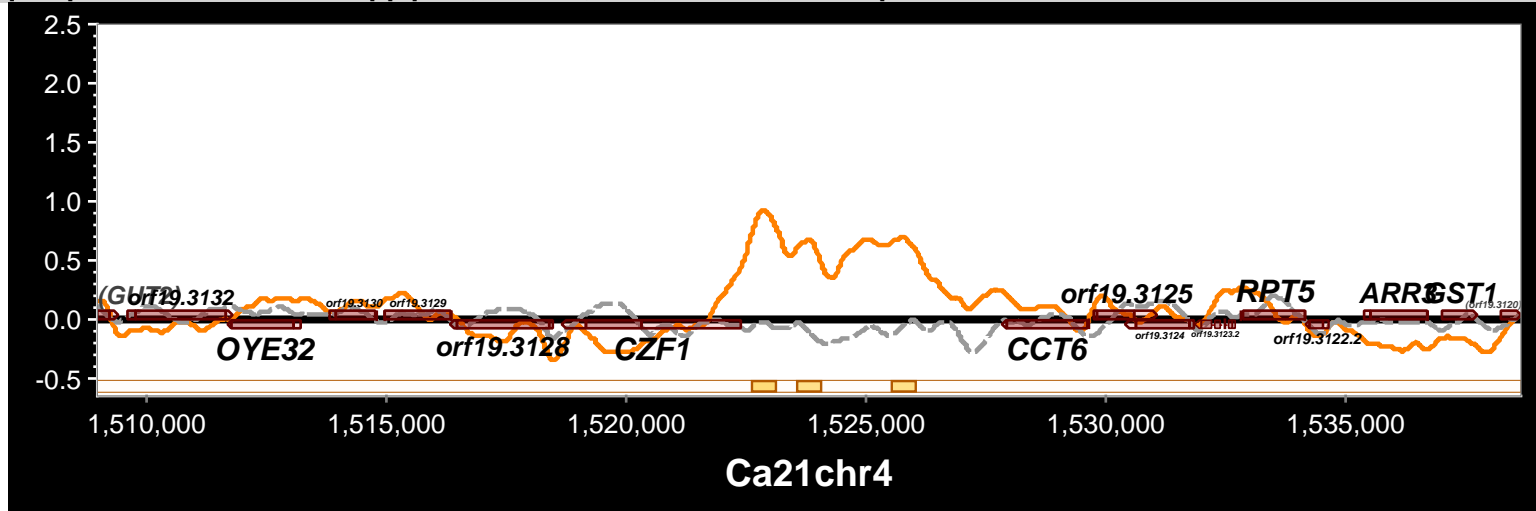

[0.666] Ca21chr2:1731123-1760806 [+] [YWP1, orf19.3617, ERG9, orf19.3621, orf19.3615]

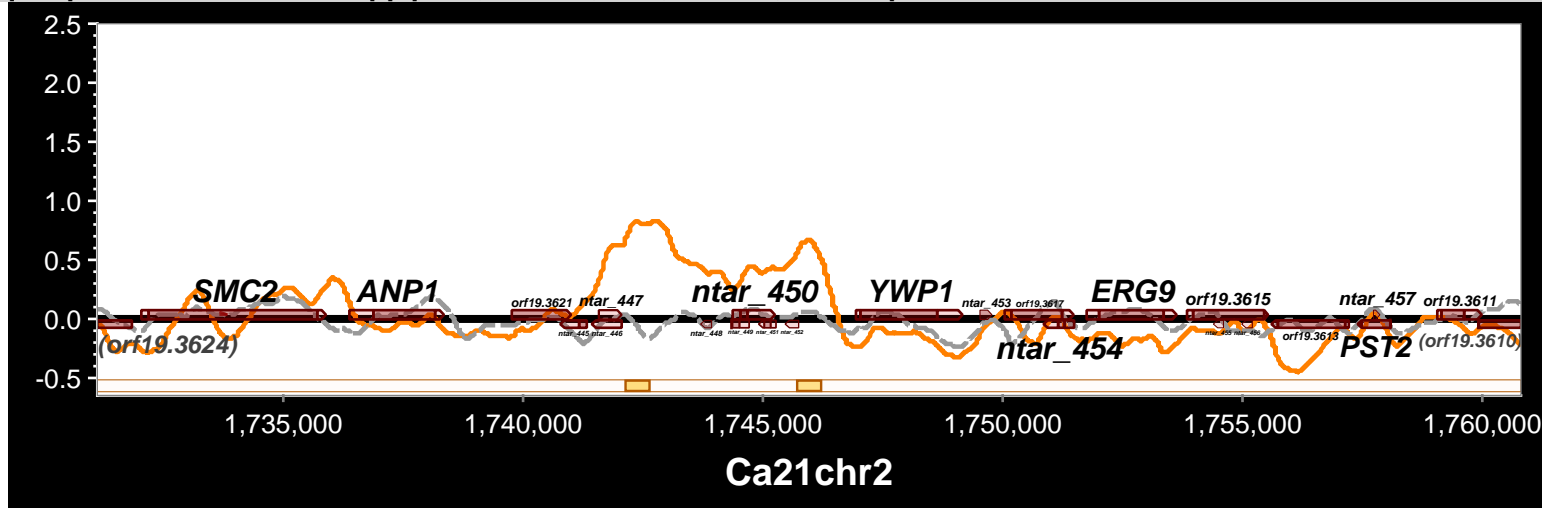

[0.663] Ca21chr6:971145-1000828 [+] [orf19.2125, orf19.2124, orf19.2127, orf19.2129, orf19.2128]

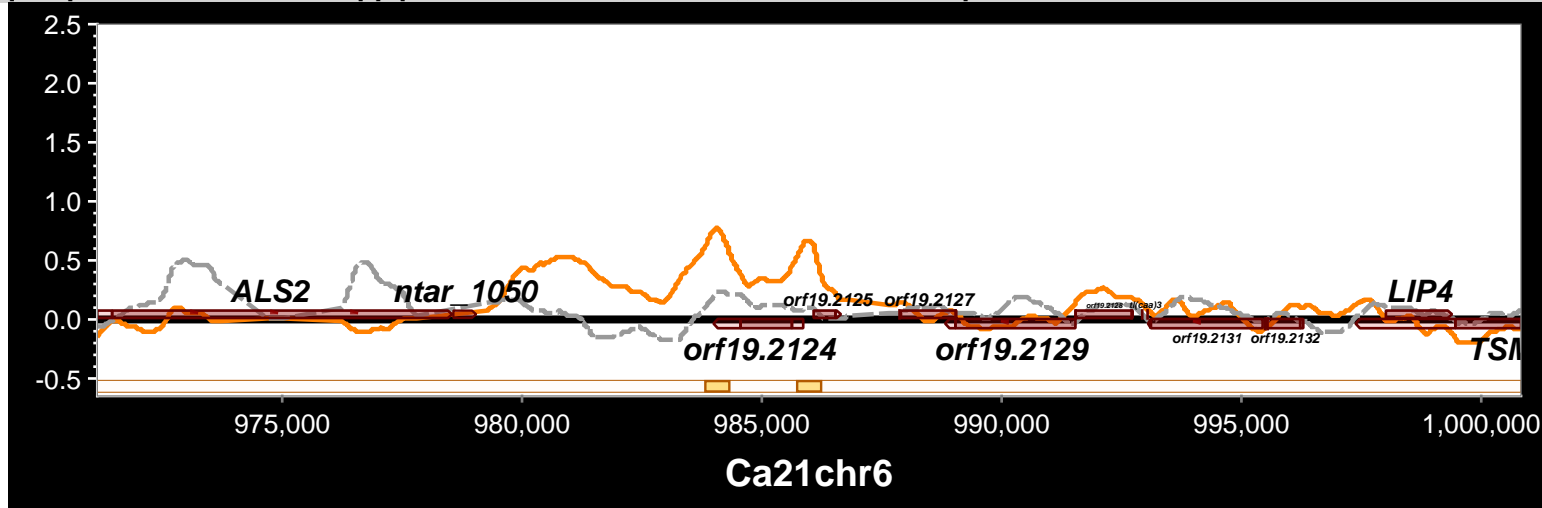

[0.662] Ca21chr2:1921387-1951070 [+] [orf19.1604, PMS1, orf19.1406, PHO13, orf19.1404]

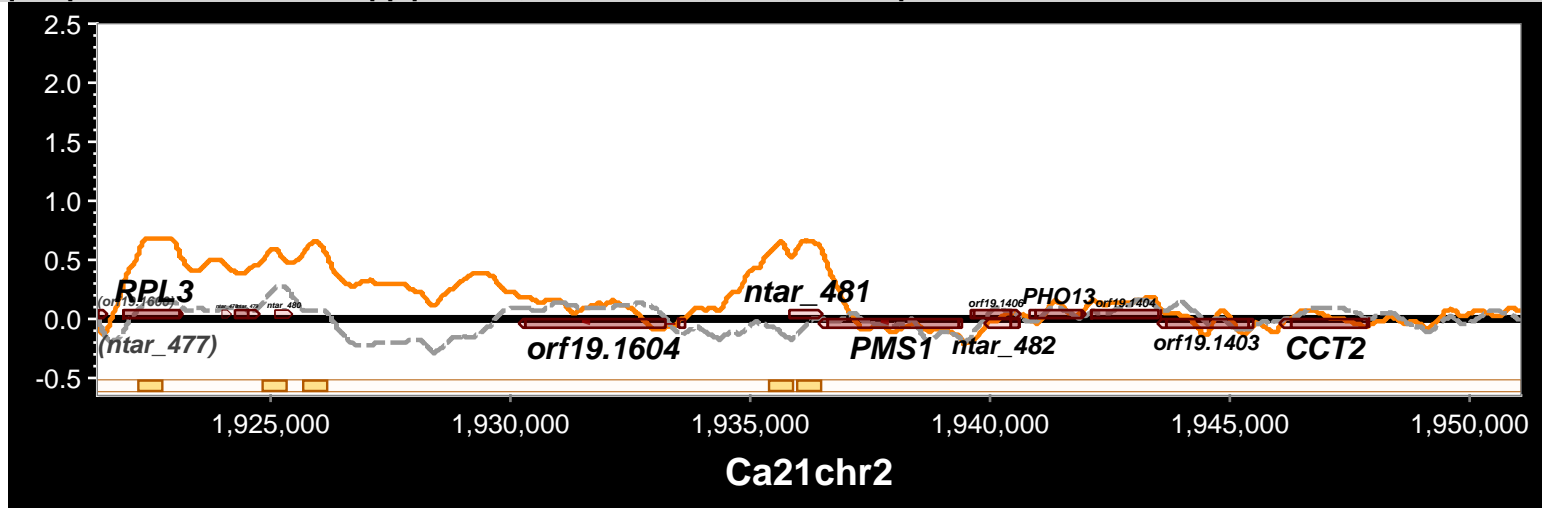

[0.661] Ca21chr6:889888-919571 [+] [ALS4, orf19.4553, orf19.4557, orf19.77.1, SPB1]

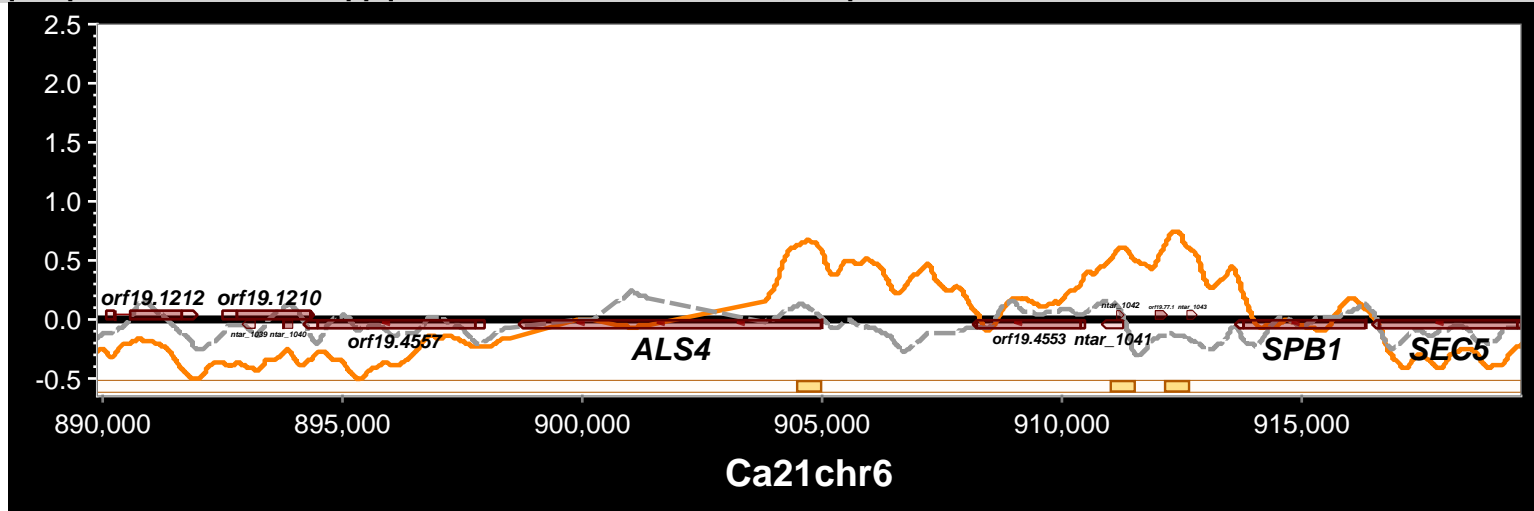

[0.661] Ca21chrR:324425-354108 [+] [tL(UAA)2, orf19.2529.1, orf19.2530, CSP37, orf19.2529]

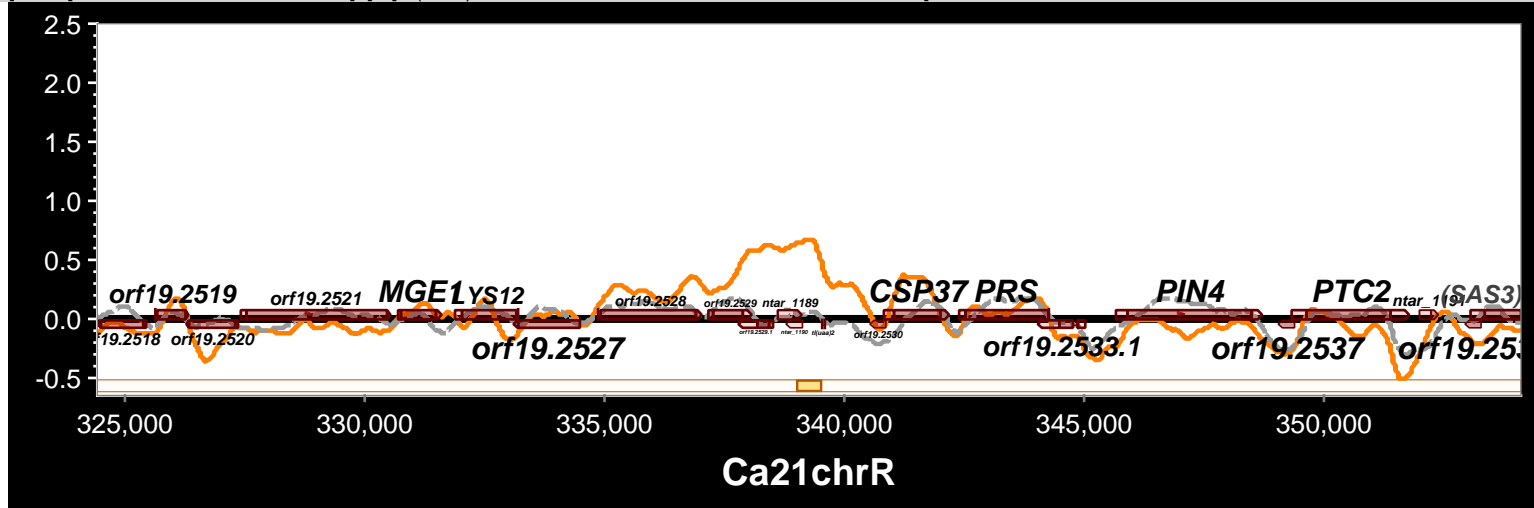

[0.659] Ca21chr6:536583-566266 [+] [orf19.5539, orf19.5537, orf19.5541, orf19.5536, SAP6]

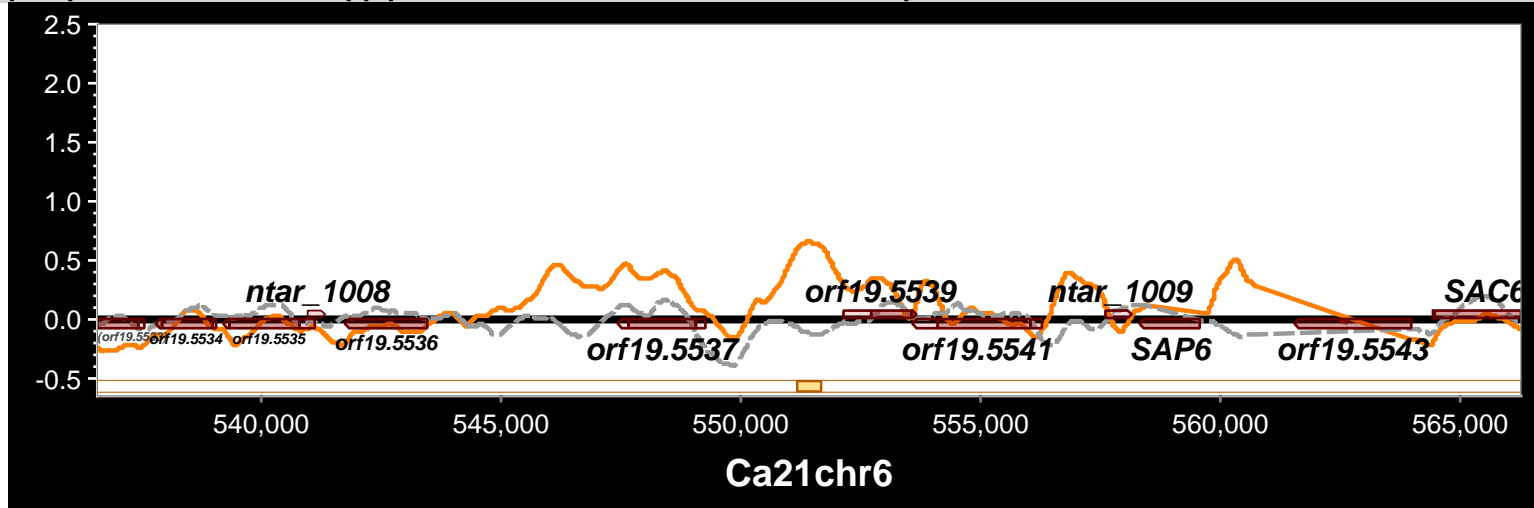

[0.655] Ca21chrR:1177962-1207645 [+] [tC(GCA)1, tC(GCA)2, orf19.5843, orf19.5844, RNR3]

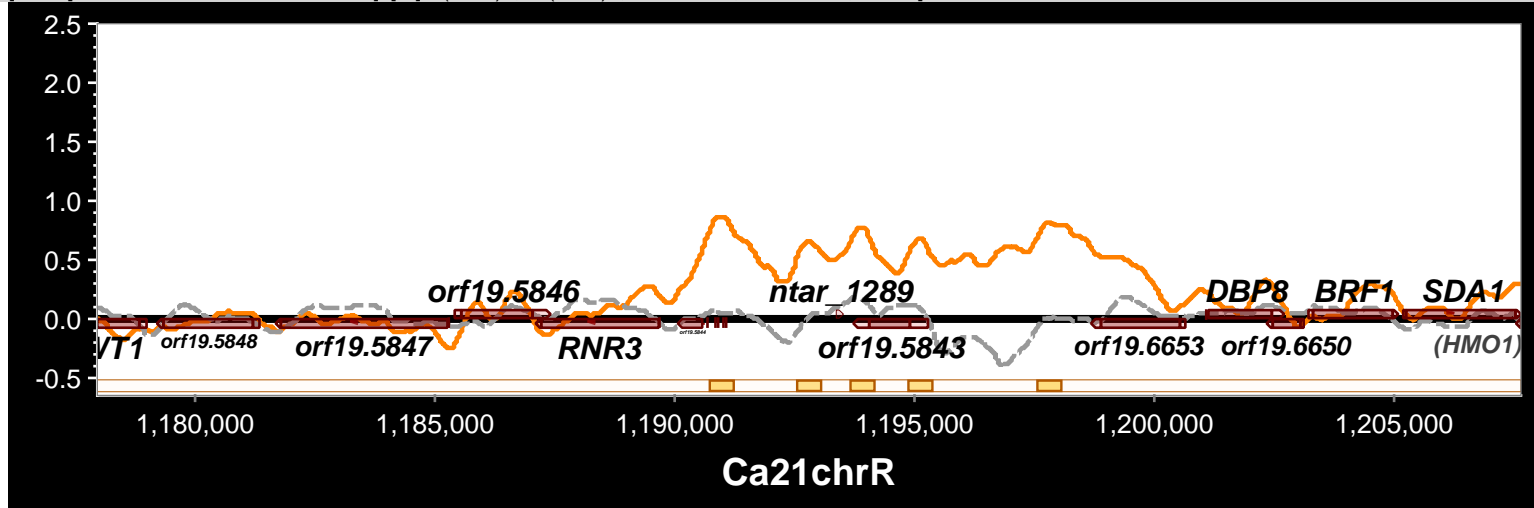

[0.654] Ca21chr5:233998-263681 [+] [CLN3, orf19.1959, orf19.1961, CYC3, orf19.1956]

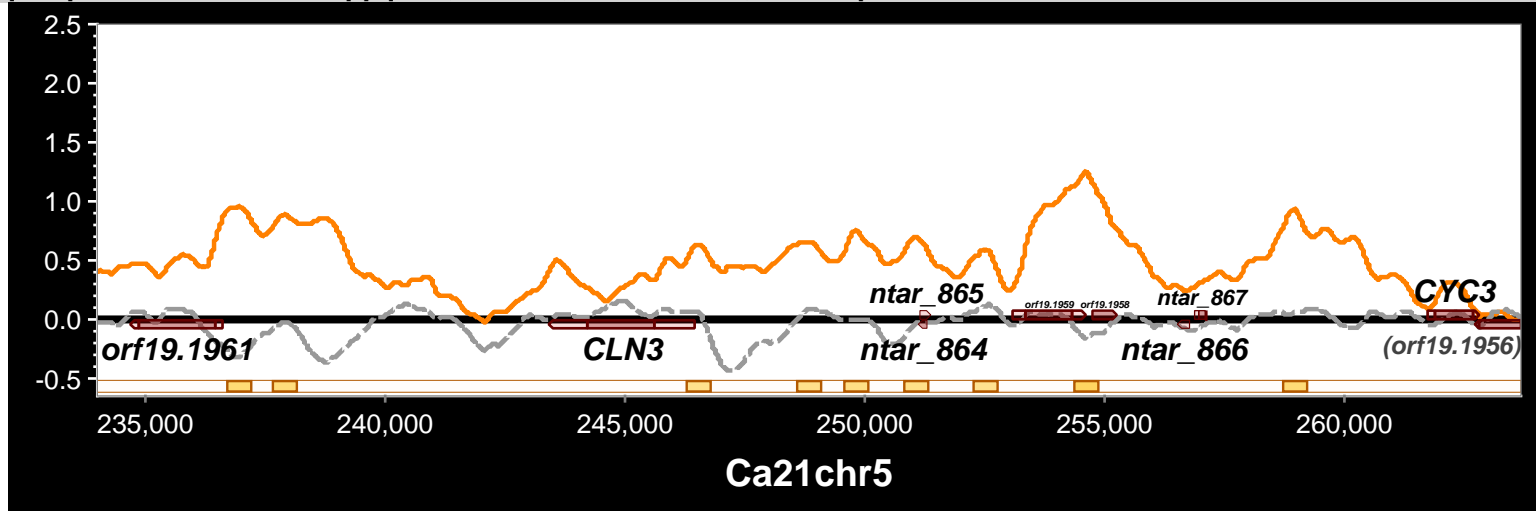

[0.653] Ca21chr1:3046254-3075937 [+] [tA(AGC)7, LCB2, orf19.5026, MODF, orf19.5030]

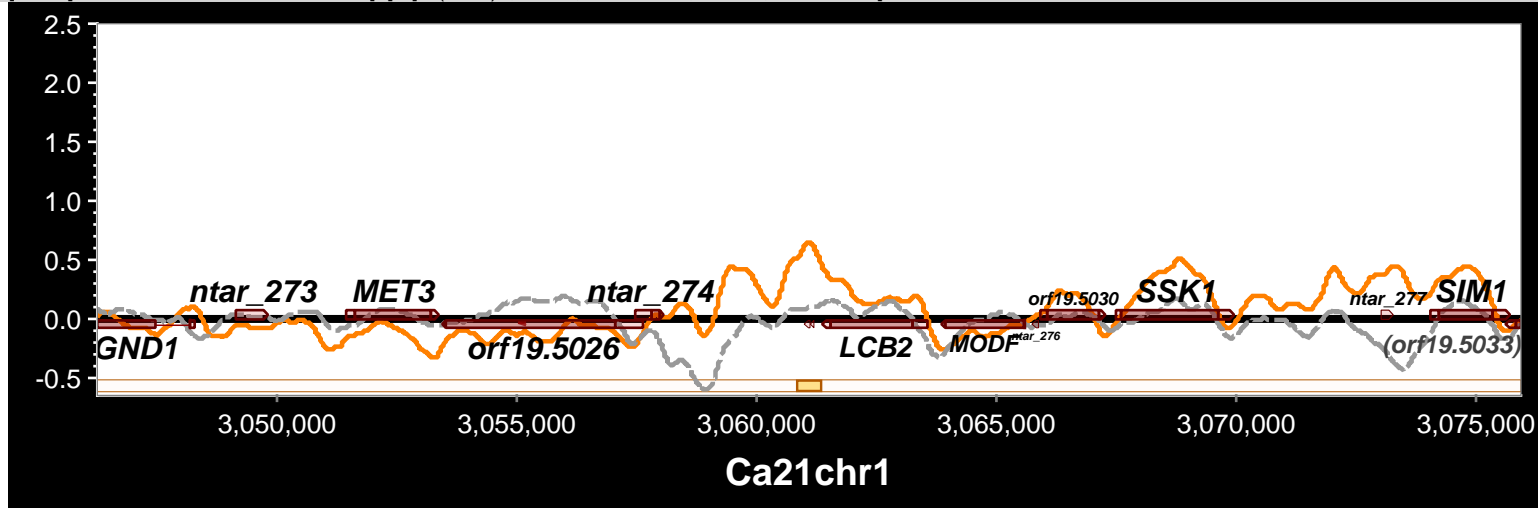

[0.653] Ca21chr2:1920801-1950484 [+] [orf19.1604, PMS1, orf19.1406, PHO13, orf19.1404]

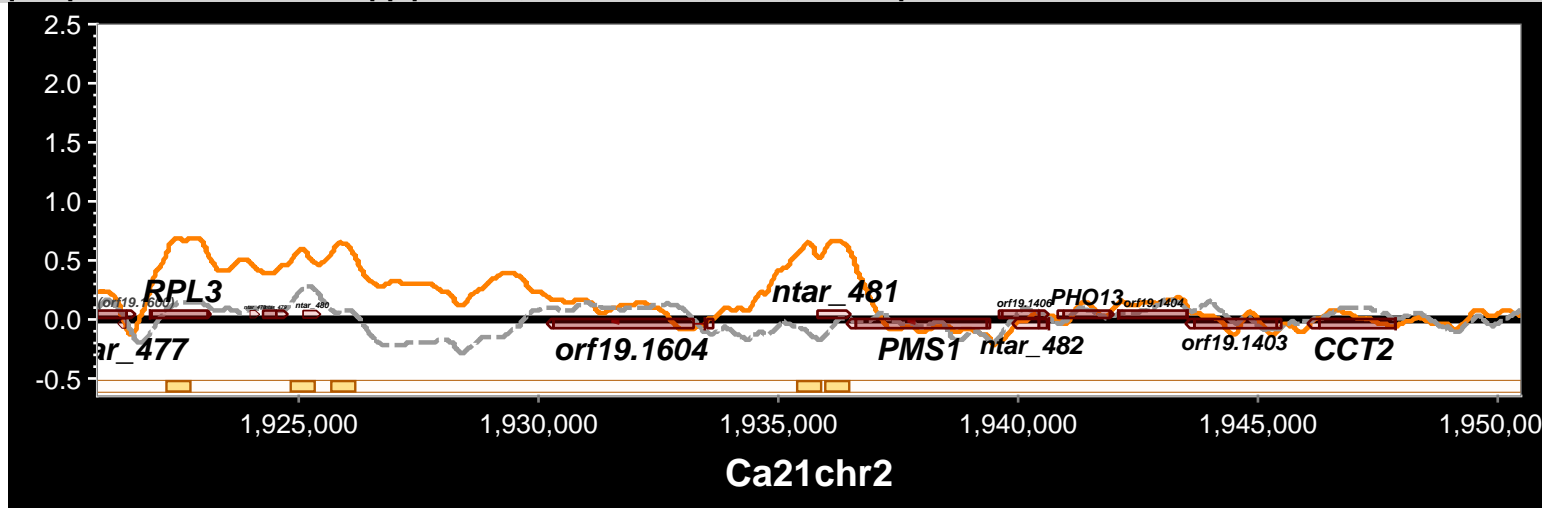

[0.653] Ca21chr3:1096206-1125889 [+] [orf19.5991, orf19.5989, WOR2, orf19.5987, THI4]

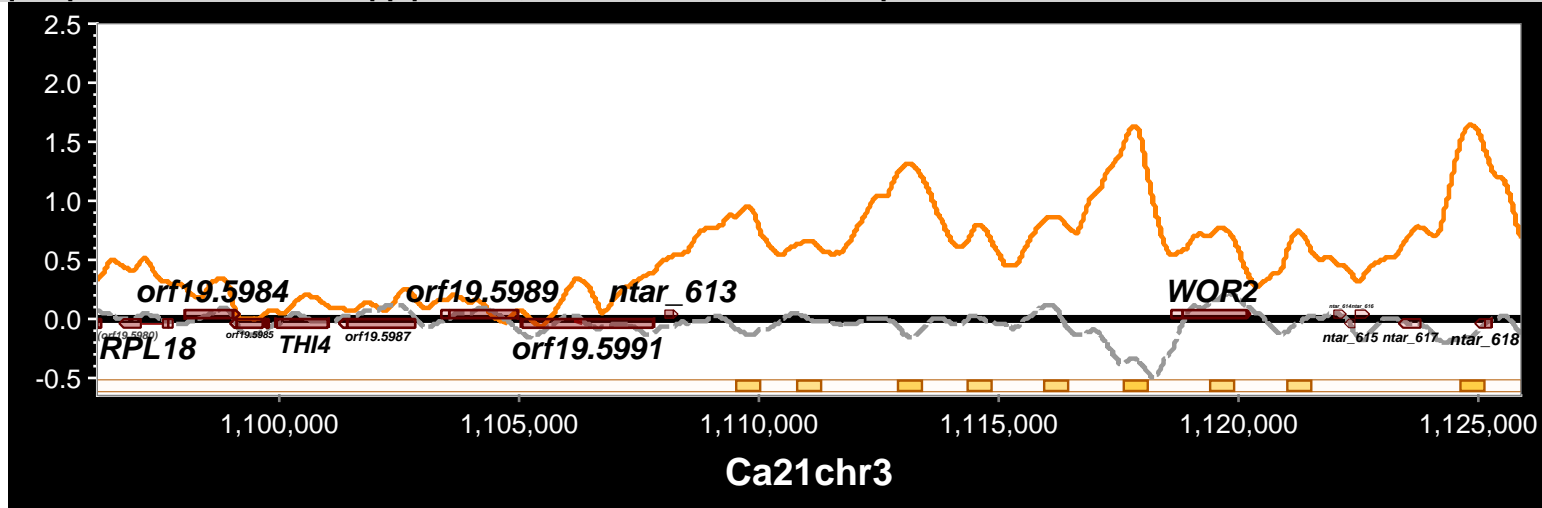

[0.652] Ca21chr1:1311823-1341506 [+] [orf19.1821, UME6, orf19.177, orf19.6280, orf19.1823]

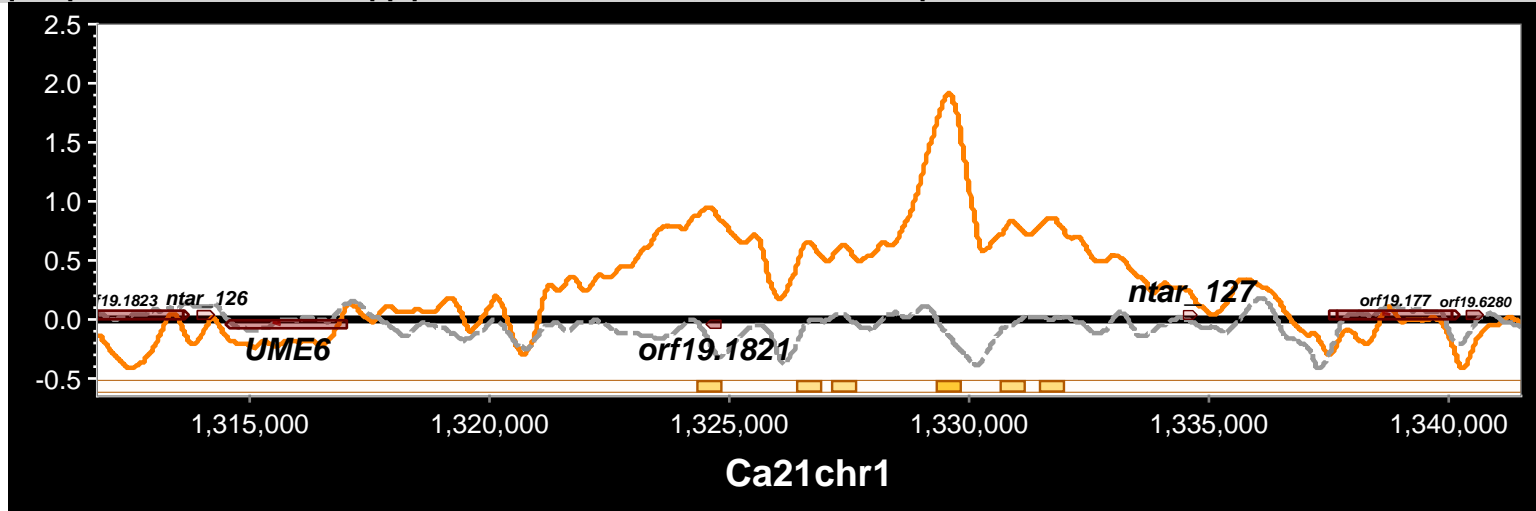

[0.652] Ca21chr2:1911088-1940771 [+] [CEN2, RPL3, orf19.1600, orf19.1604, orf19.1599]

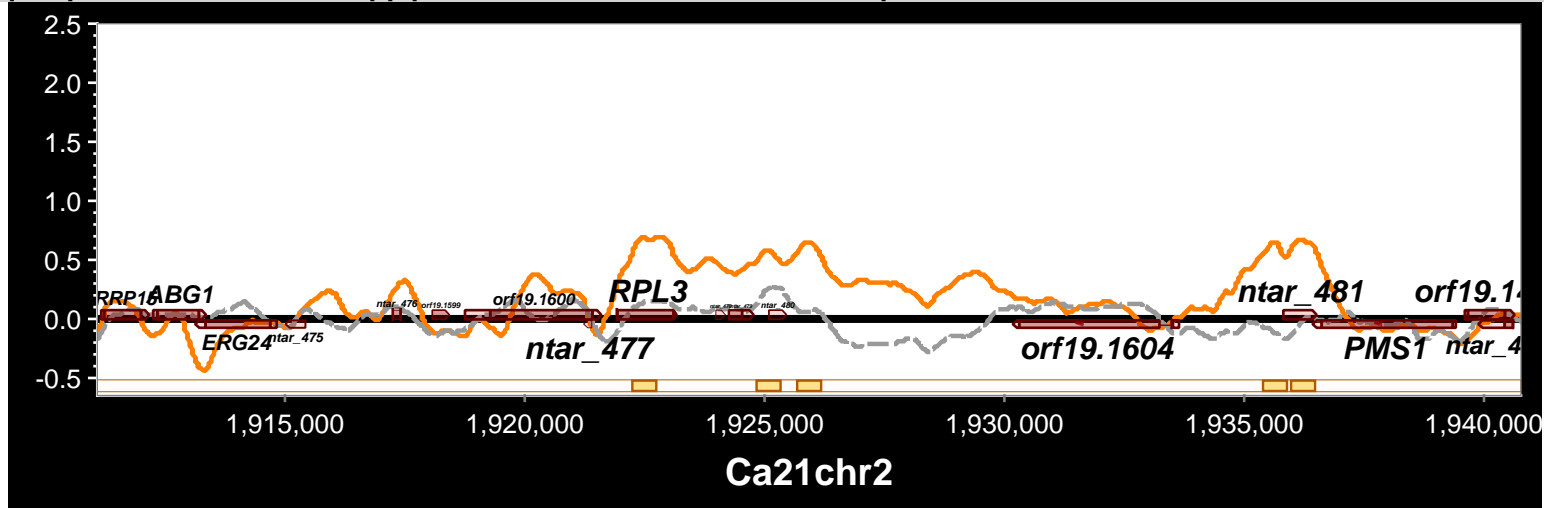

[0.651] Ca21chr1:390827-420510 [+] [HGT1, orf19.4528, orf19.4529, orf19.4530.1, HSP30]

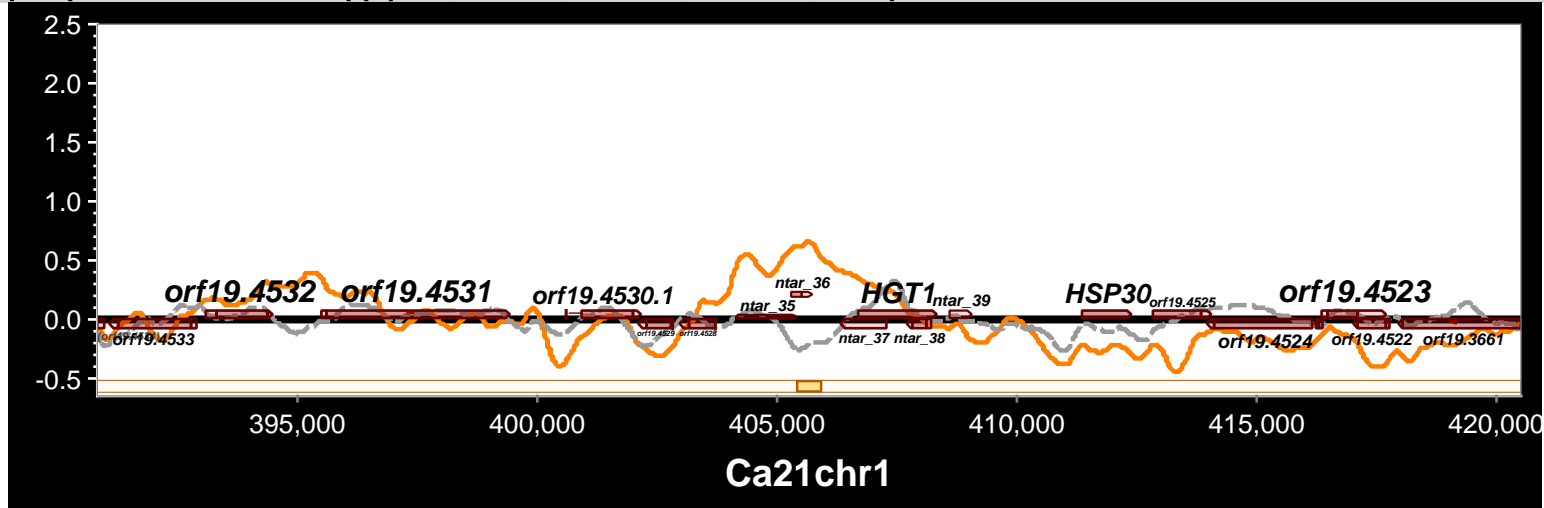

[0.651] Ca21chr4:766458-796141 [+] [tD(GUC)4, tG(GCC)2, tD(GUC)3, tD(GUC)2, SPO75]

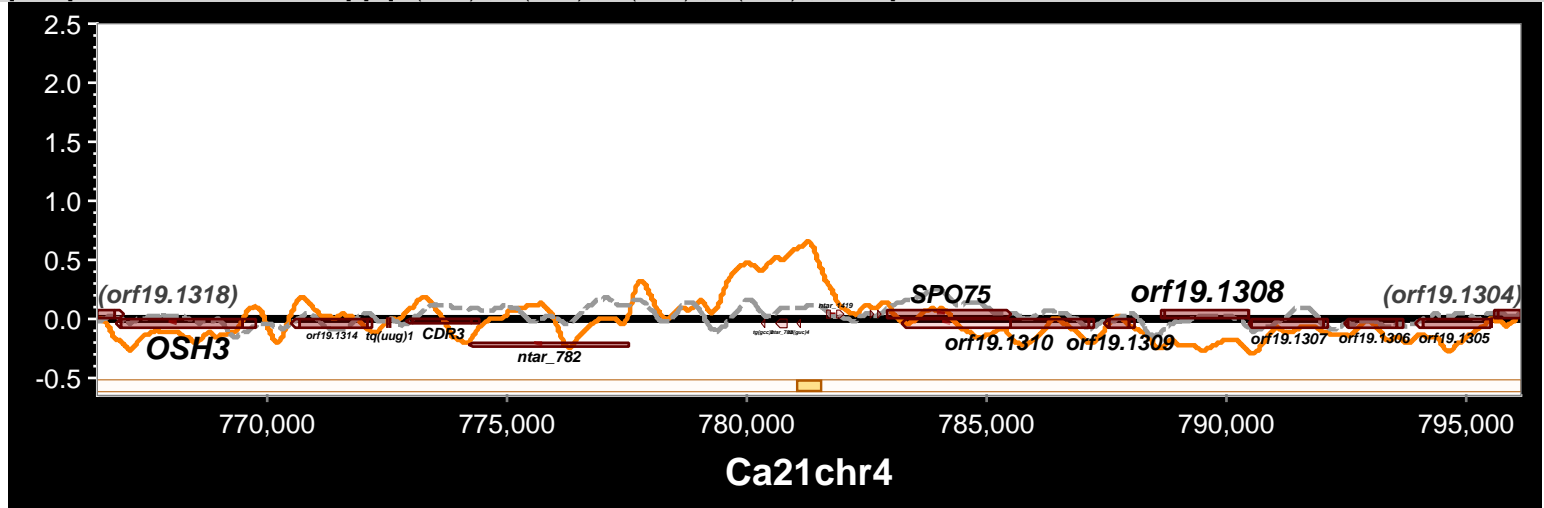

[0.651] Ca21chrR:2093293-2122976 [+] [DEF1, BET2, YTA6, FGR46, DPB2]

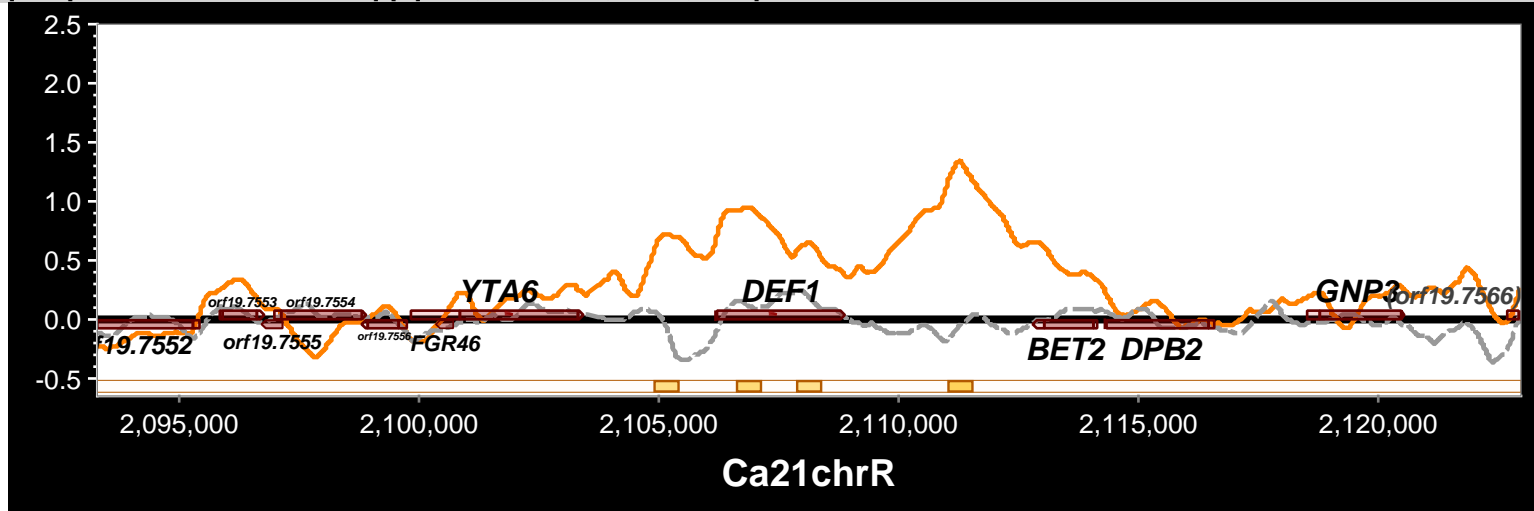

[0.648] Ca21chr3:1710283-1739966 [+] [orf19.6736, TCC1, orf19.6737, orf19.6732, orf19.6731.1]

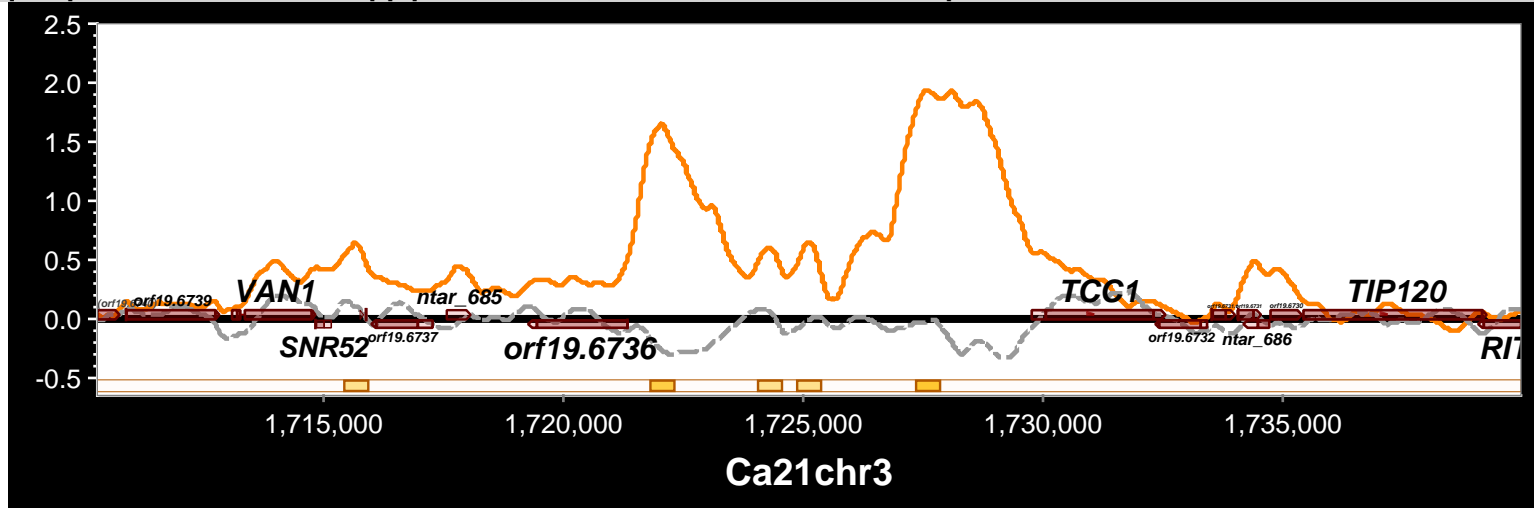

[0.644] Ca21chr7:168635-198318 [+] [orf19.7027, MCM1, orf19.7024, orf19.7023, orf19.7022]

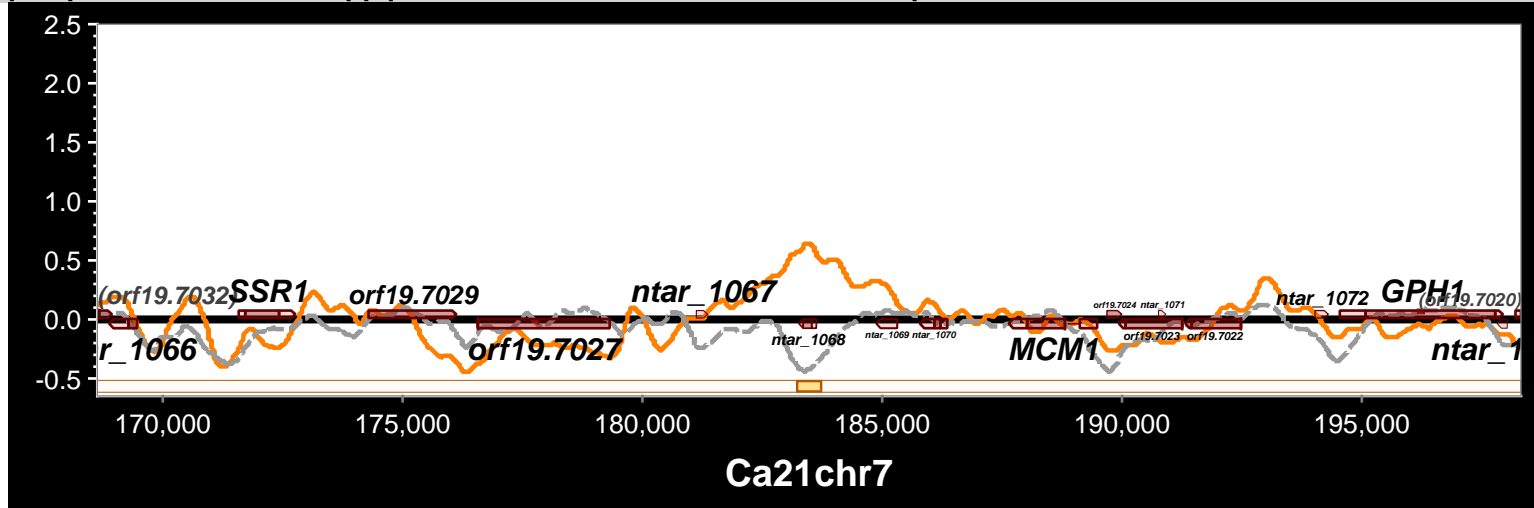

[0.642] Ca21chr5:1103418-1133101 [+] [orf19.4000, orf19.4001, DUN1, orf19.3999, orf19.3998]

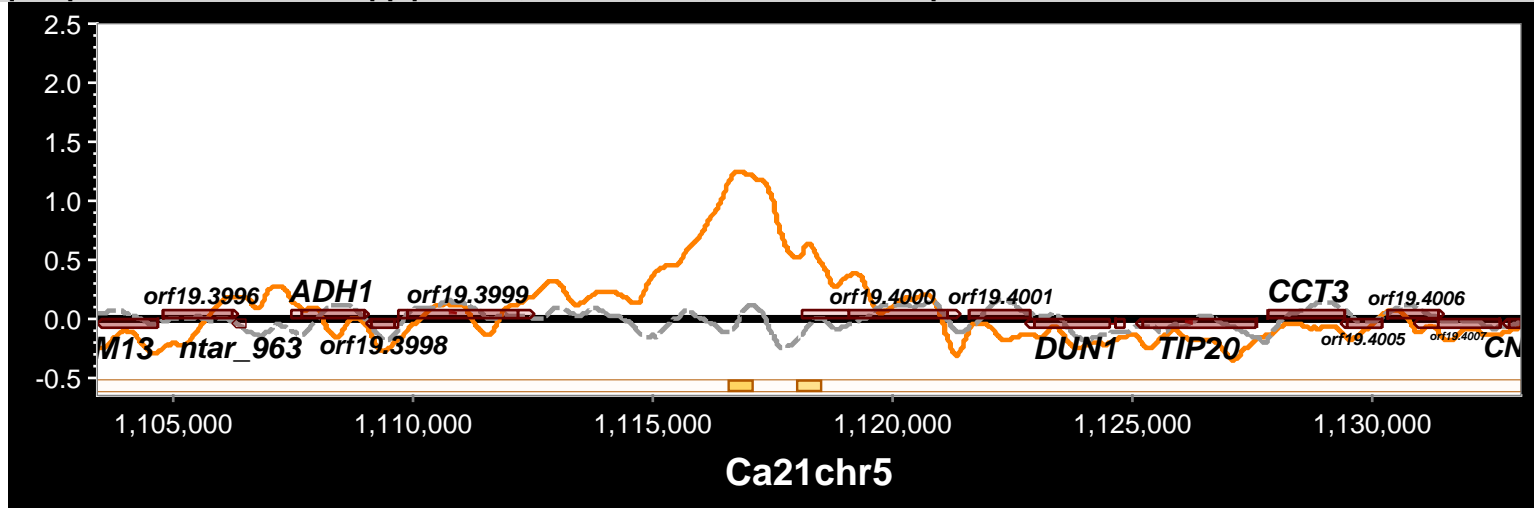



[0.642] Ca21chr6:175657-205340 [+] [CAN1, TOP1, HAL21, orf19.95, orf19.100]

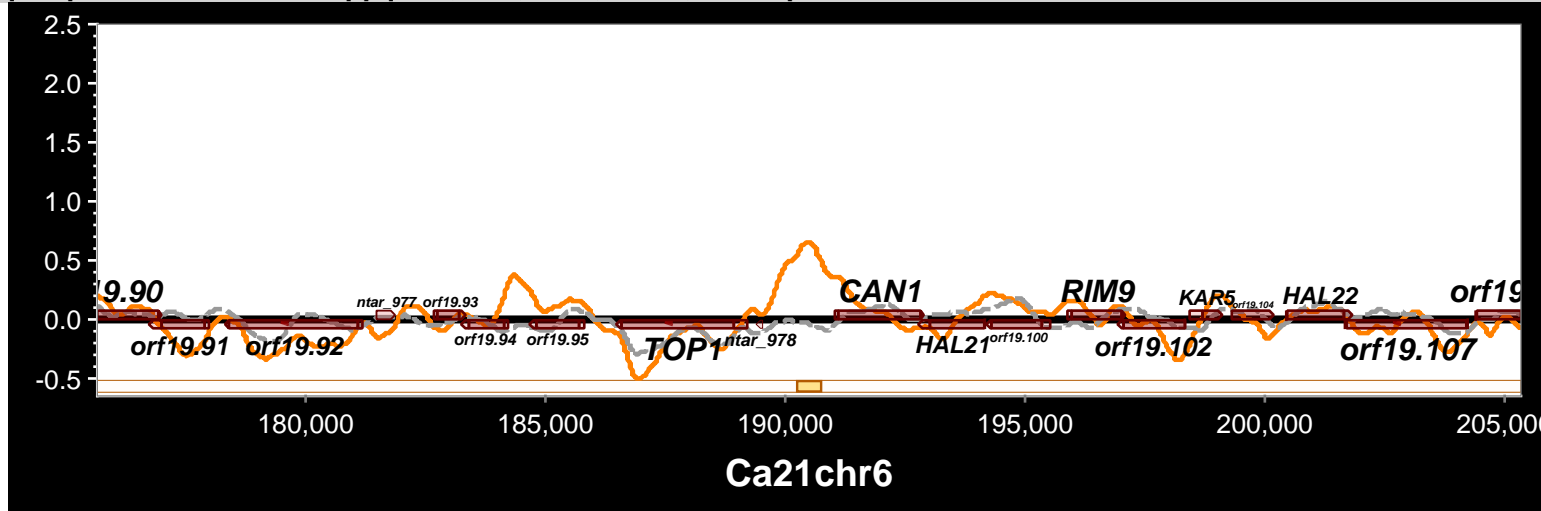

[0.641] Ca21chr1:287722-317405 [+] [orf19.3338, orf19.3337, SOD2, orf19.3341, orf19.3342]

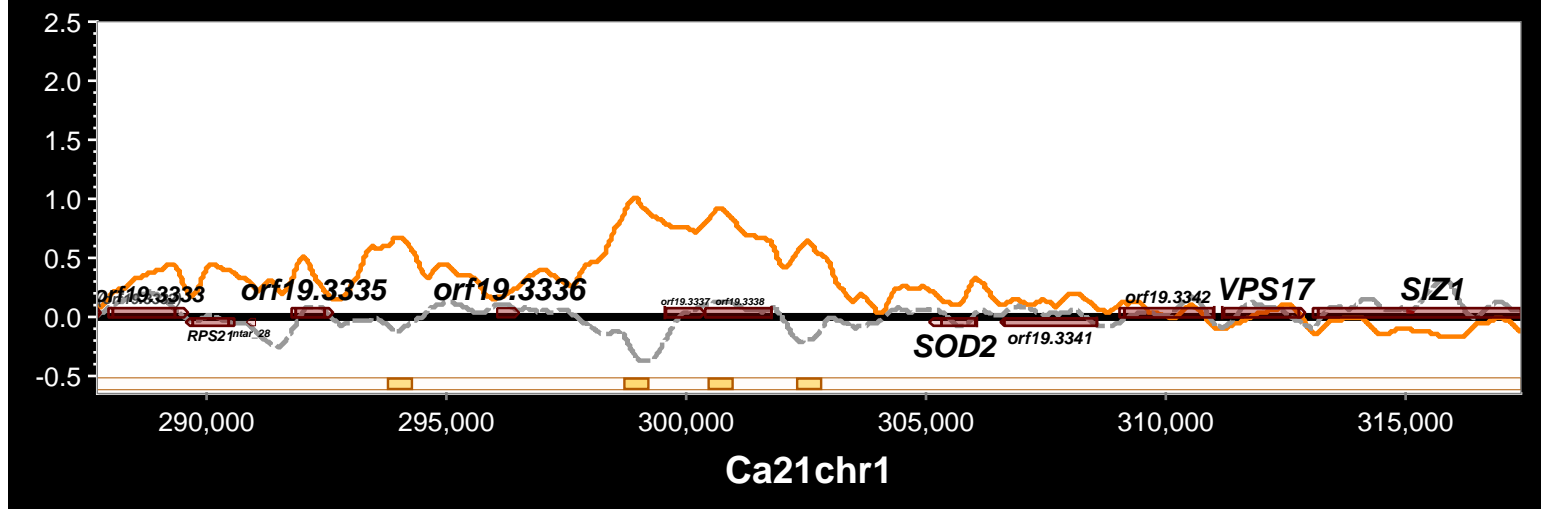

[0.641] Ca21chr2:1622871-1652554 [+] [orf19.2178.1, SIT1, orf19.2178, RPS10, orf19.2177]

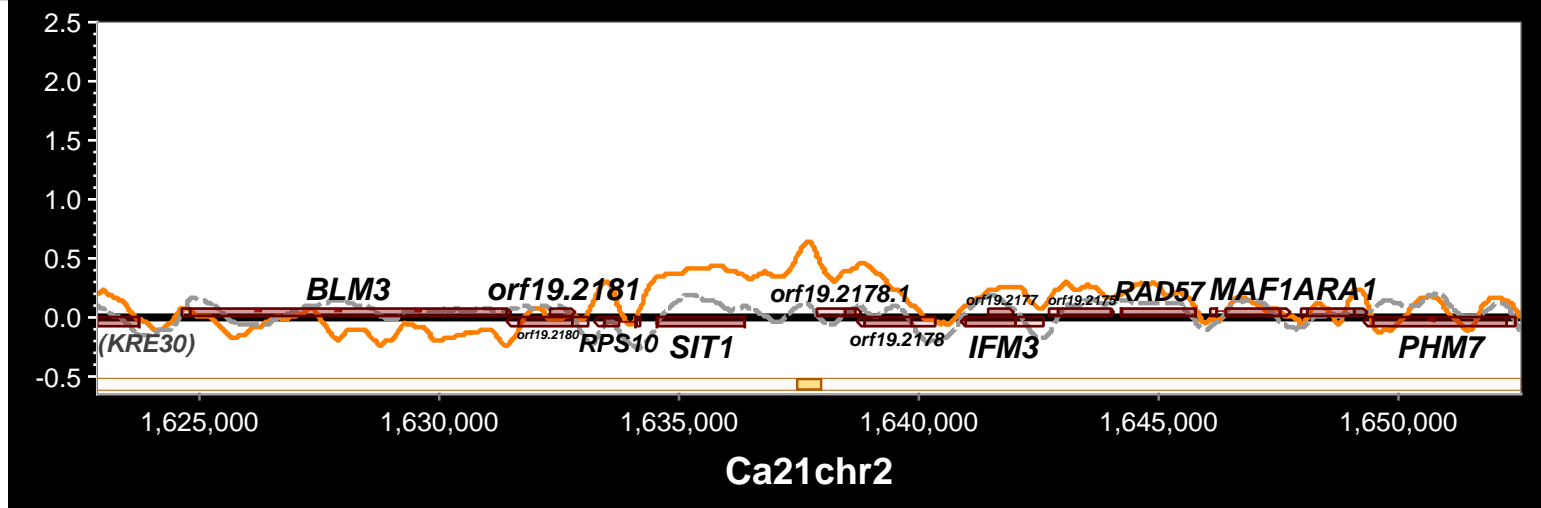

[0.637] Ca21chr5:725769-755452 [+] [orf19.2653, TEF4, CAM1-1, orf19.2650.1, RMS1]

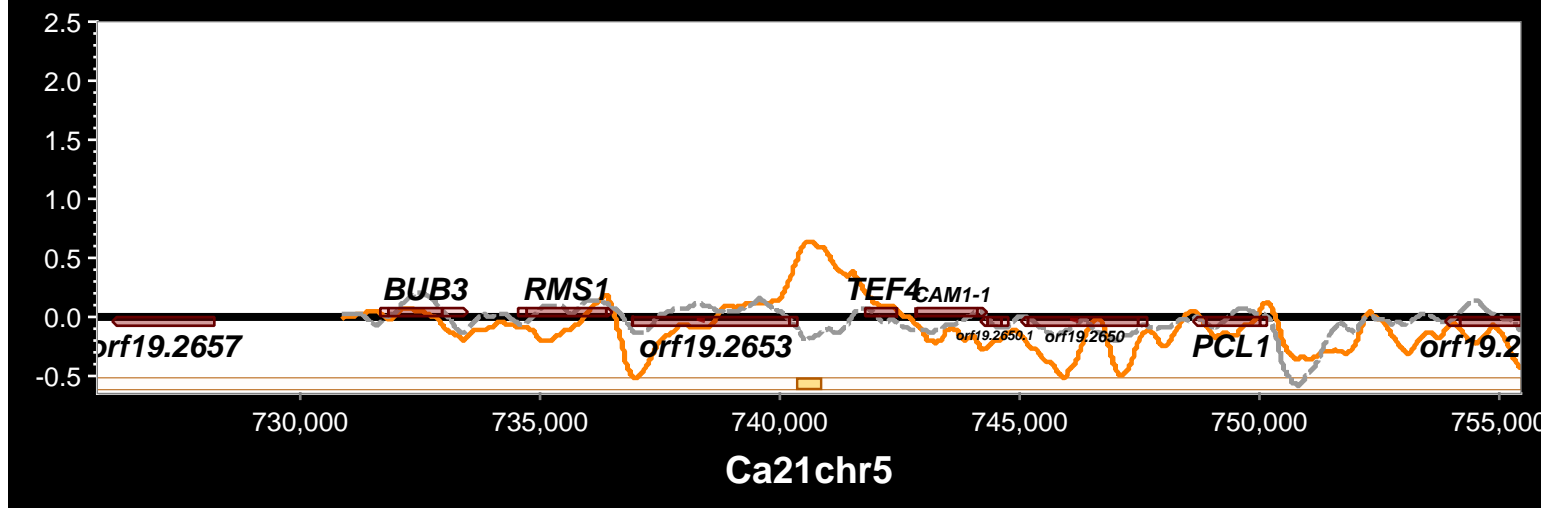

[0.634] Ca21chr1:880746-910429 [+] [GPM2, orf19.1066, RPN4, SSA2, orf19.1070]

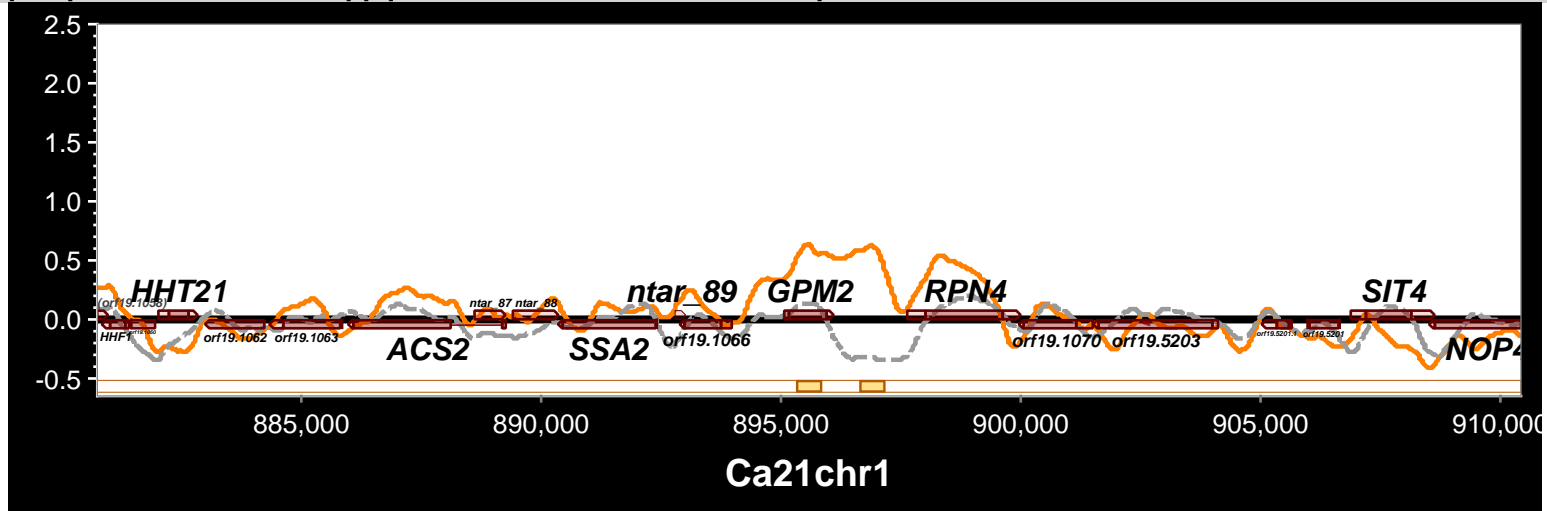

[0.633] Ca21chr7:101384-131067 [+] [GAC1, orf19.7054, orf19.7052, orf19.7051, orf19.7056]

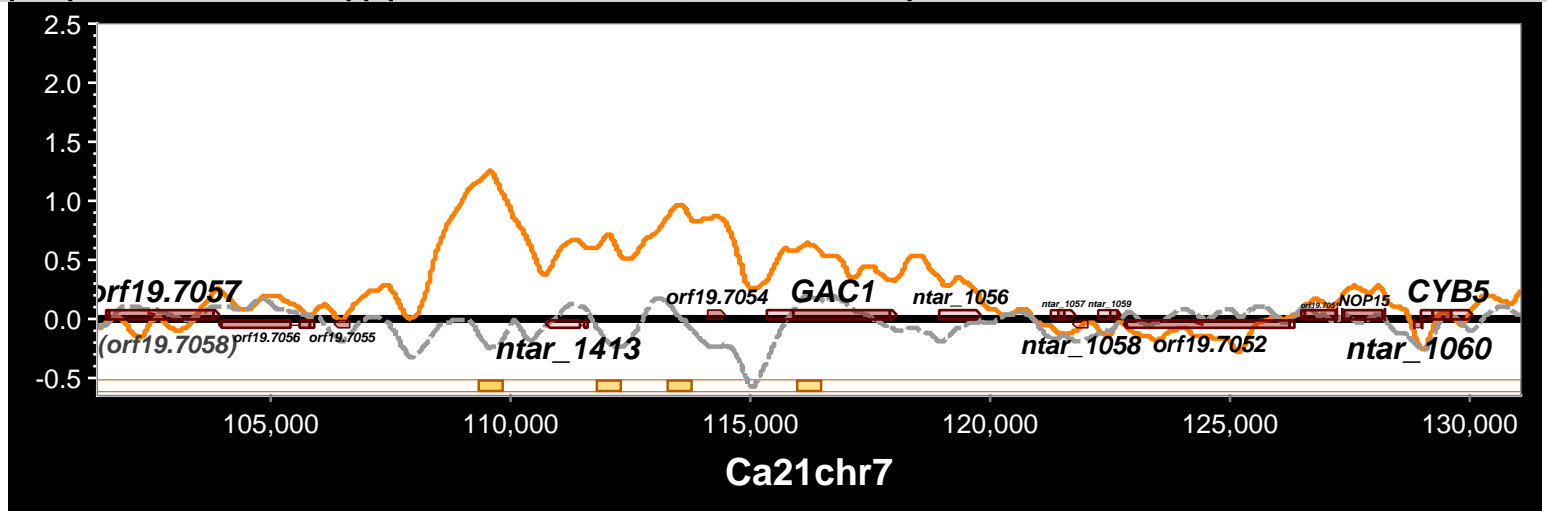

[0.632] Ca21chr5:231695-261378 [+] [CLN3, orf19.1959, orf19.1961]

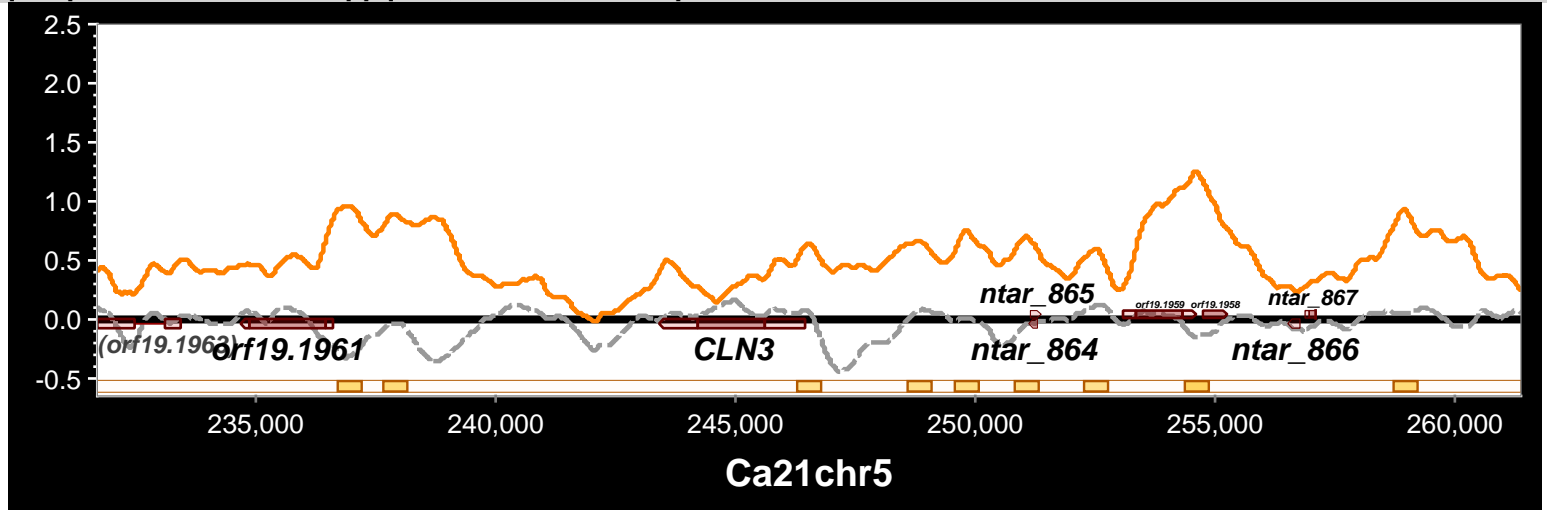

[0.632] Ca21chr6:825424-855107 [+] [IHD1, PGA61, tA(UGC)2, SNQ2, orf19.5763]

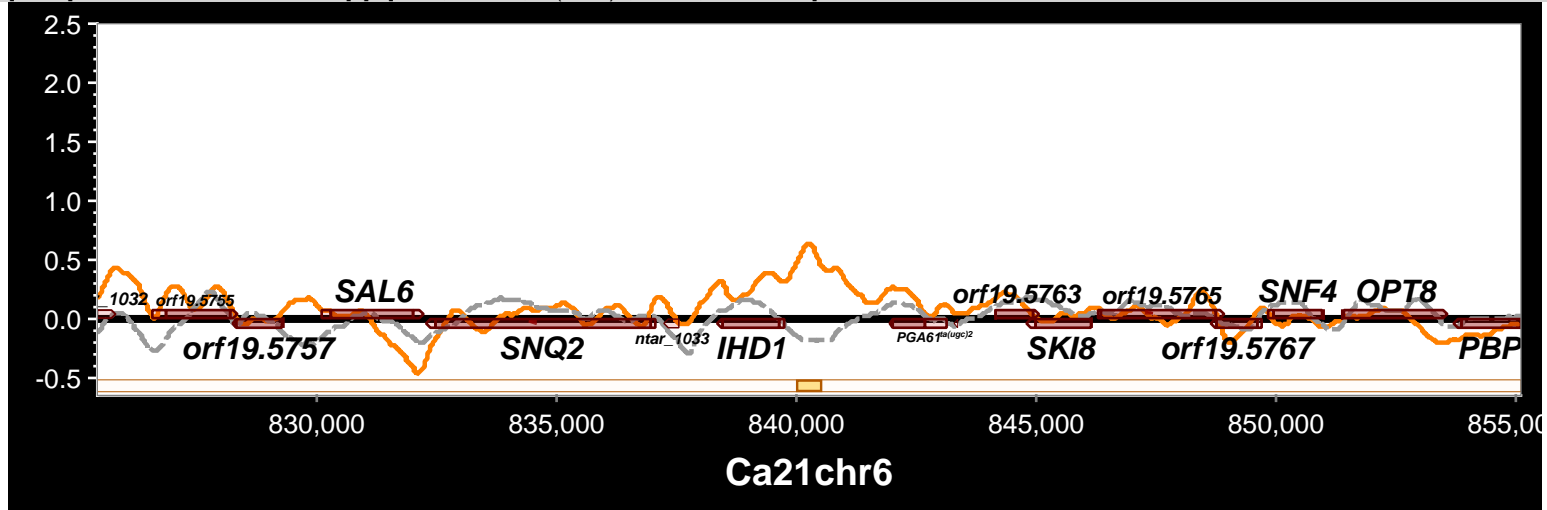

[0.631] Ca21chr3:1700841-1730524 [+] [tR(UCU)5, tF(GAA)5, SNR52, orf19.6737, VAN1]

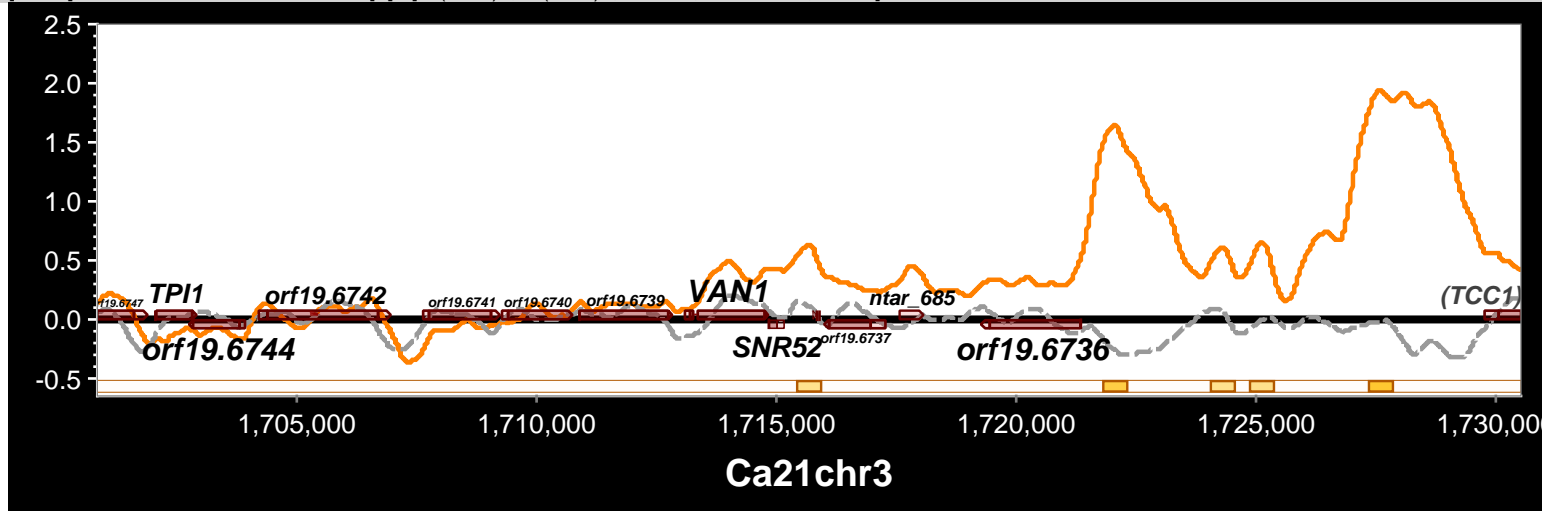

[0.631] Ca21chr4:546903-576586 [+] [orf19.2726, GRX3, orf19.2725, orf19.2728, orf19.2730]

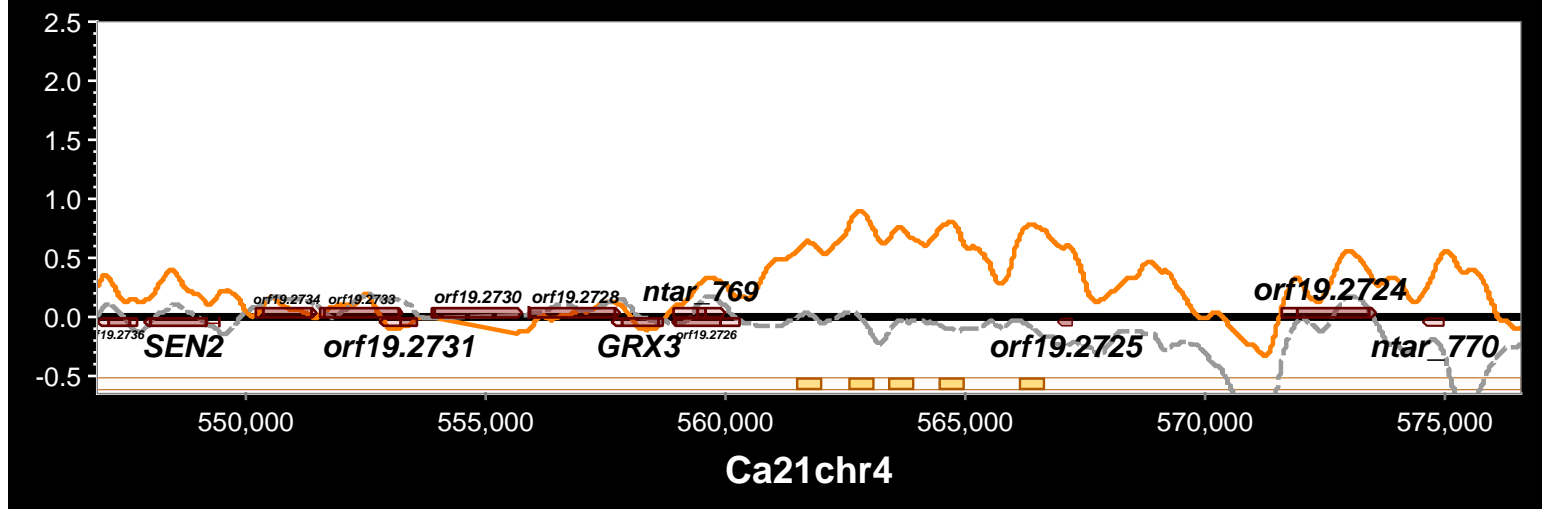

[0.63] Ca21chr5:758592-788275 [+] [orf19.2638, tE(UUC)5, orf19.2639, orf19.2637, orf19.2639.1]

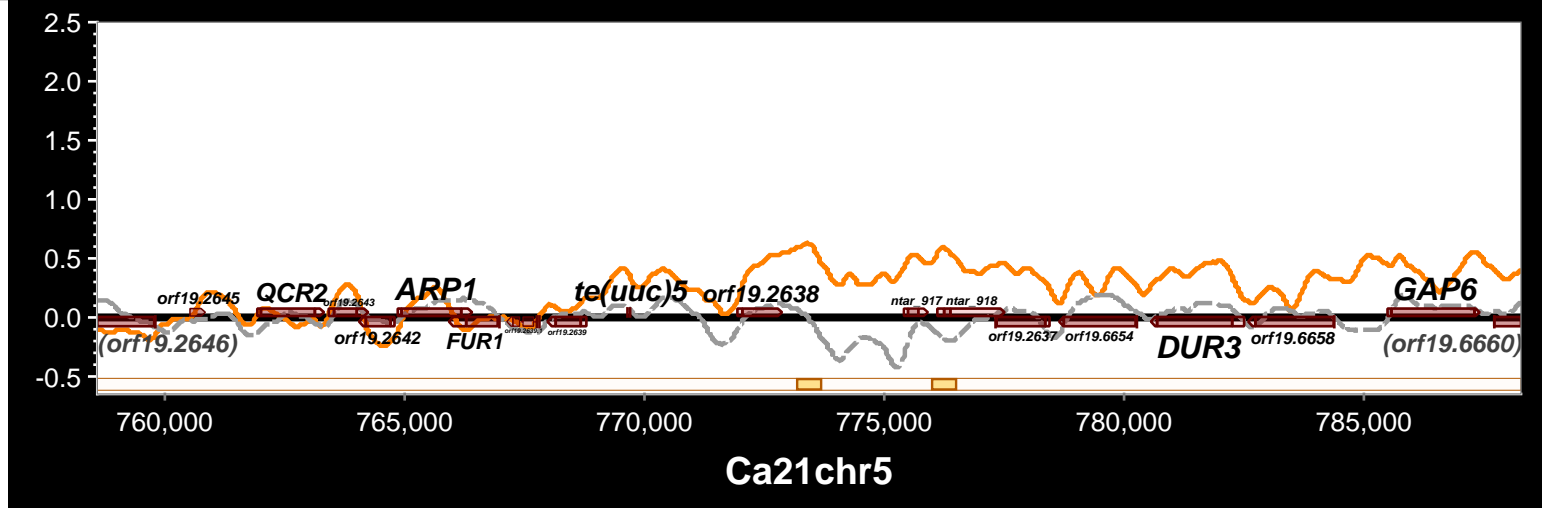

[0.626] Ca21chr1:1181389-1211072 [+] [orf19.2478.1, orf19.2478, UGA4, AUT7, orf19.2481]

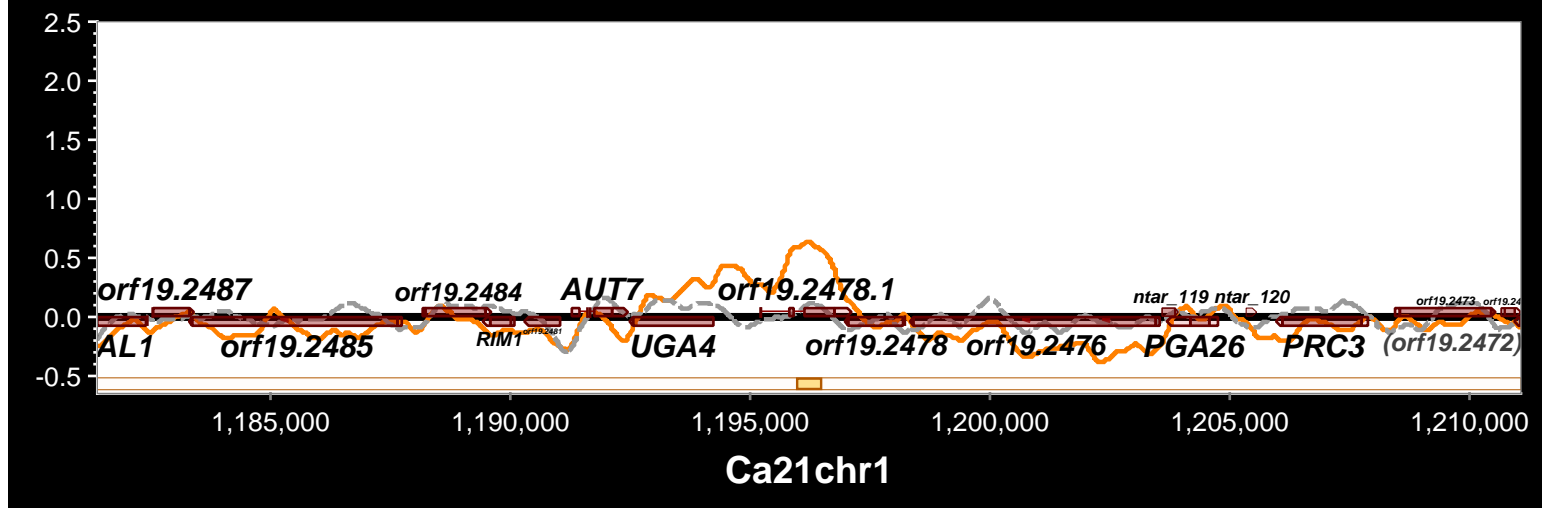

[0.623] Ca21chr3:781920-811603 [+] [PTR2, MEU1, RAD53, orf19.6941, orf19.6934]

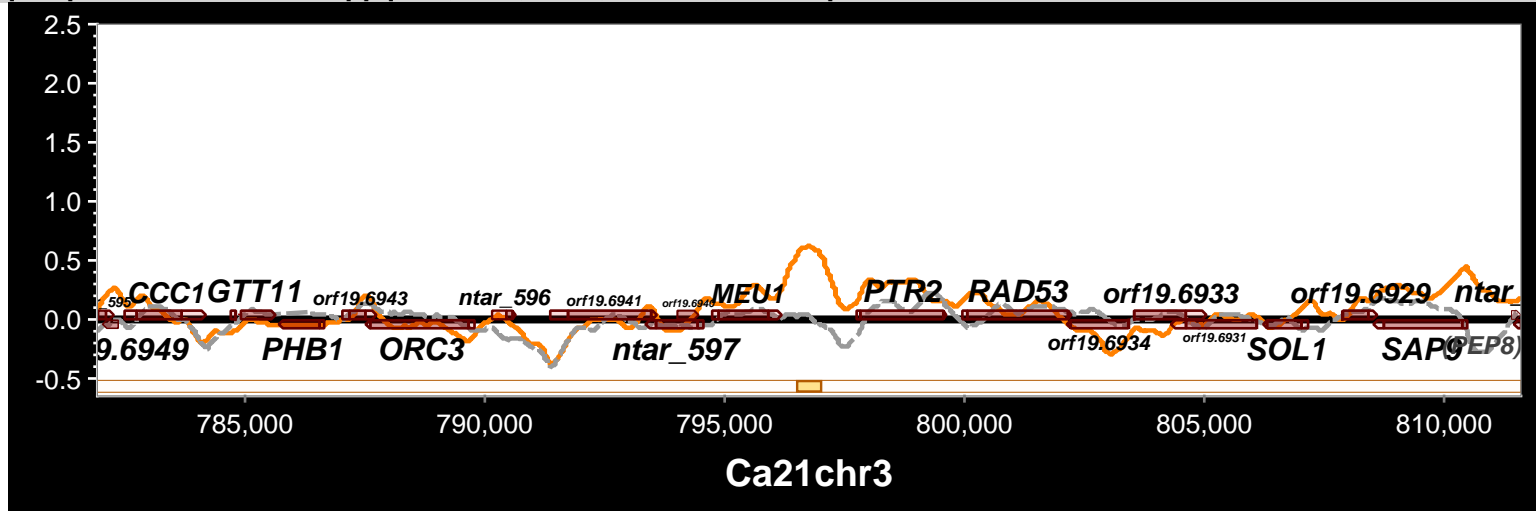

[0.622] Ca21chr1:882065-911748 [+] [RPN4, GPM2, orf19.1066, orf19.1070, SSA2]

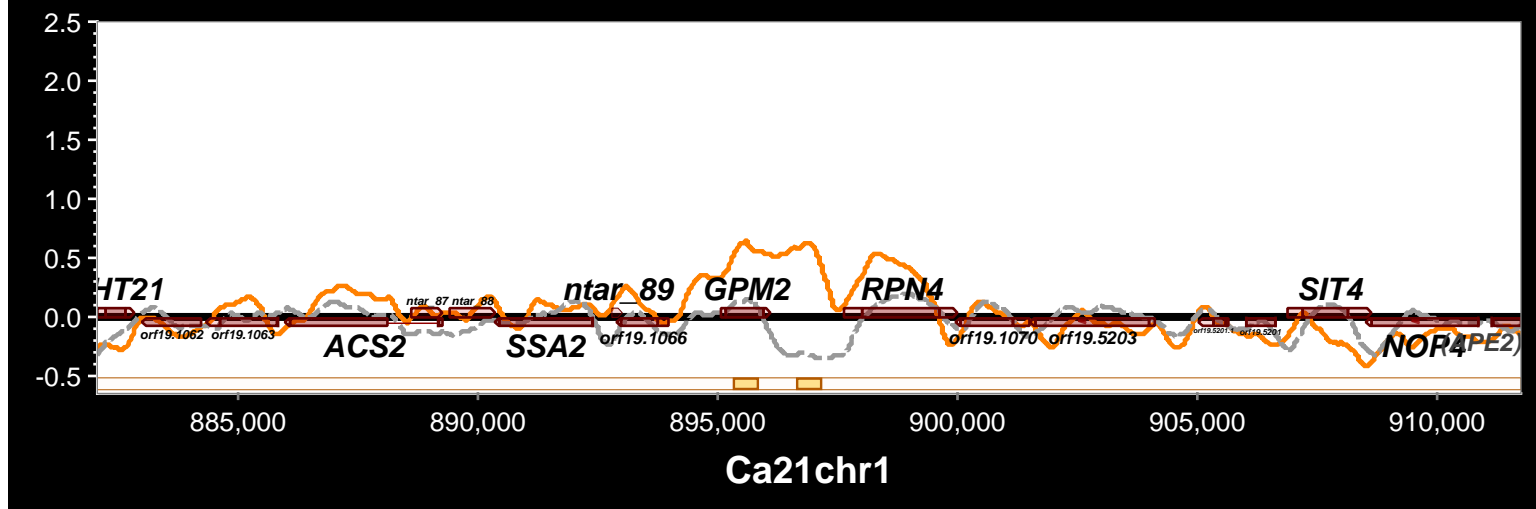

[0.622] Ca21chr4:1087978-1117661 [+] [orf19.741, HAP41, ALD6, MYO5, GDB1]

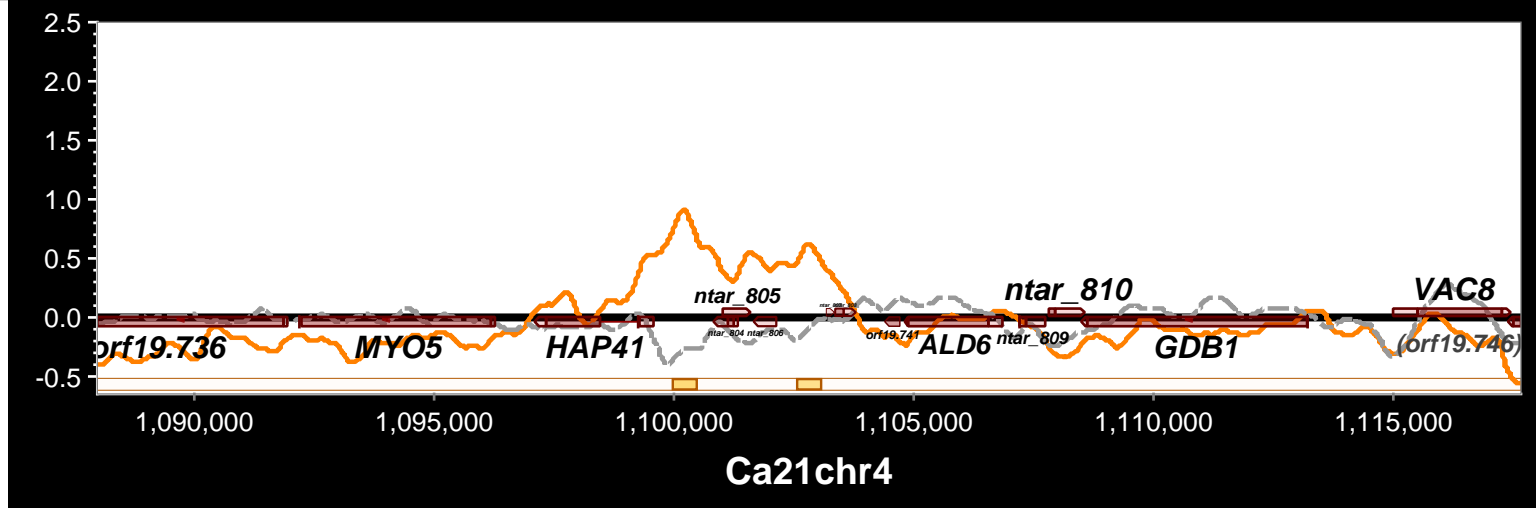

[0.622] Ca21chr5:334435-364118 [+] [SPO1, CEF3, orf19.4153, orf19.4150, orf19.4149]

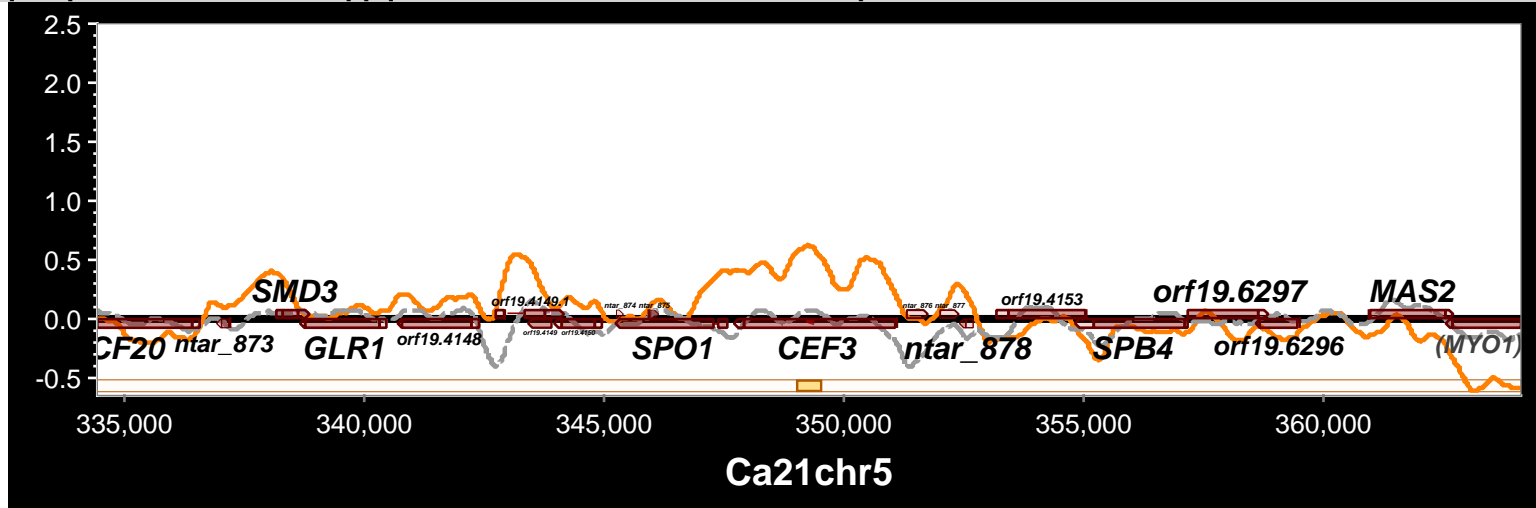

[0.621] Ca21chr1:498331-528014 [+] [GSC1, orf19.2930, orf19.2933, orf19.2934, orf19.2928]

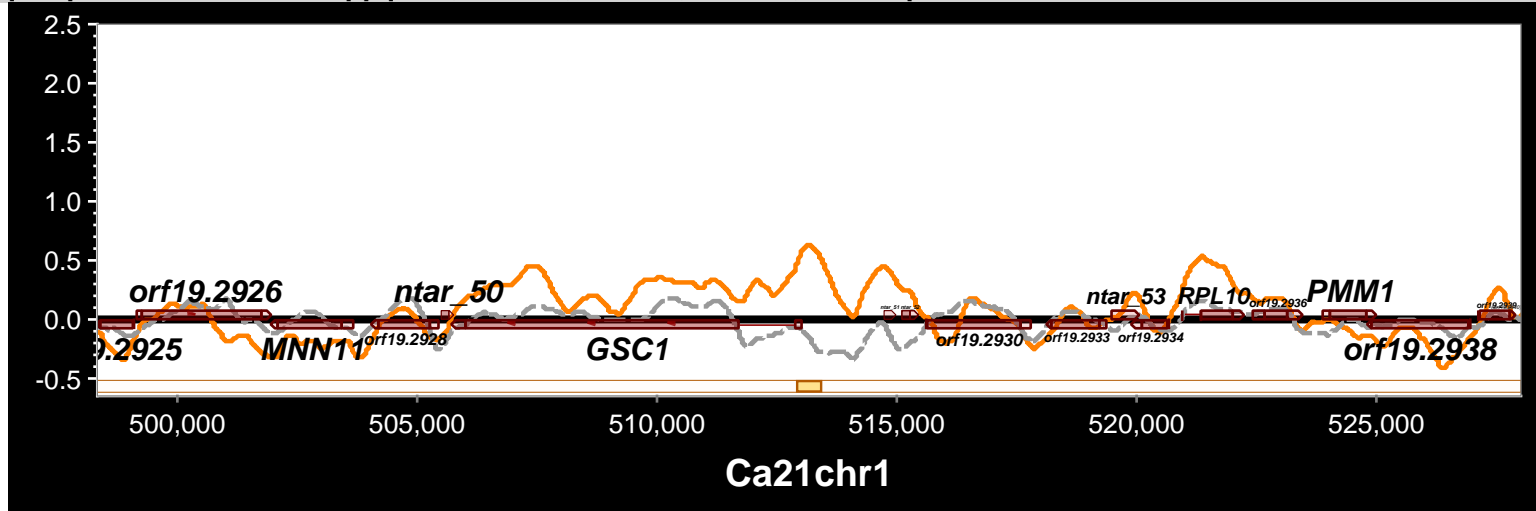

[0.621] Ca21chr1:617465-647148 [+] [RPS16A, RPL13, orf19.2995, RPP1A, orf19.2996]

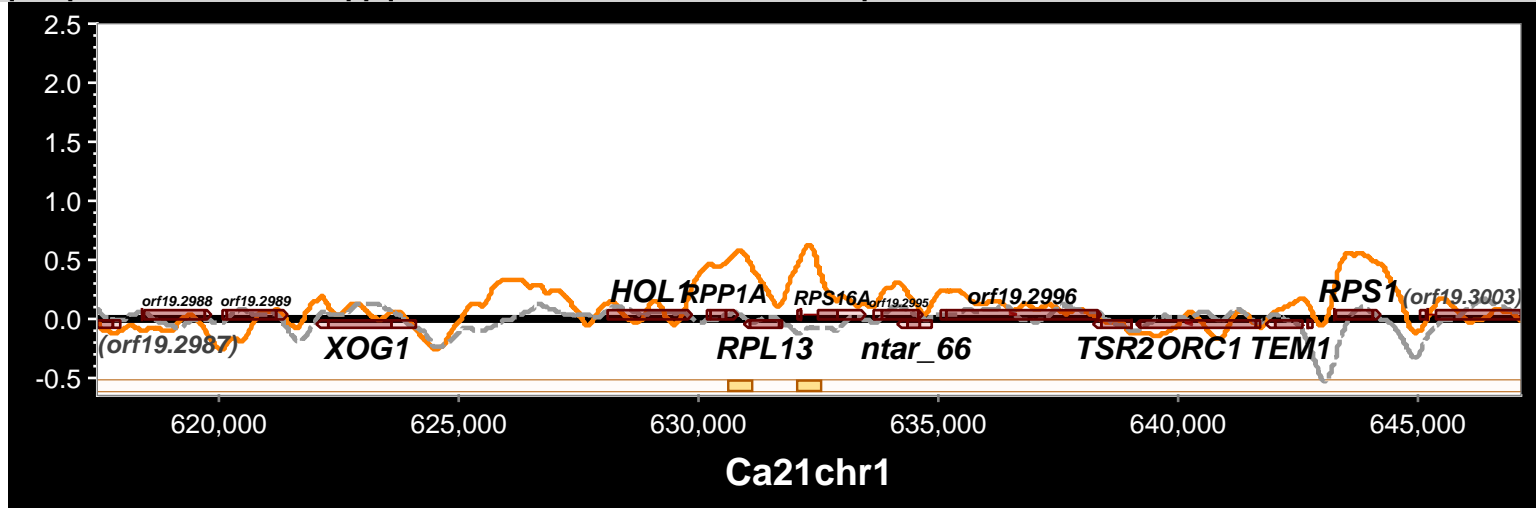

[0.621] Ca21chr1:1312552-1342235 [+] [orf19.1821, orf19.177, UME6, orf19.6280, orf19.1823]

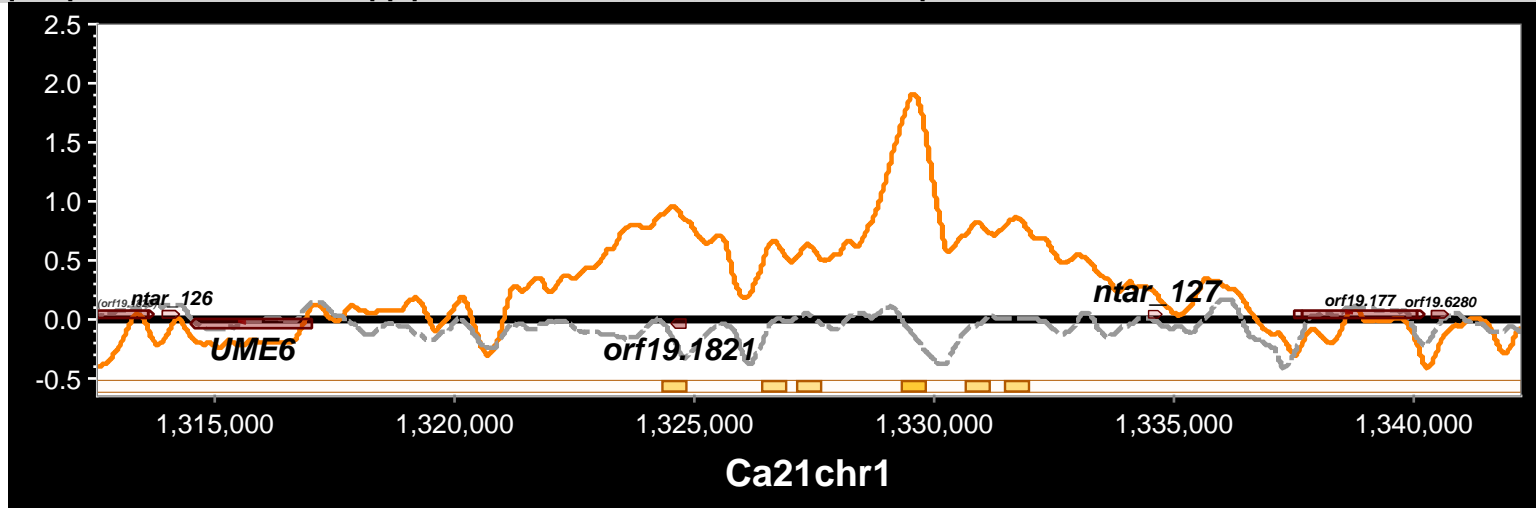

[0.621] Ca21chr1:1363365-1393048 [+] [orf19.6264.4, RPS22A, orf19.6264.3, RPS14B, orf19.6264]

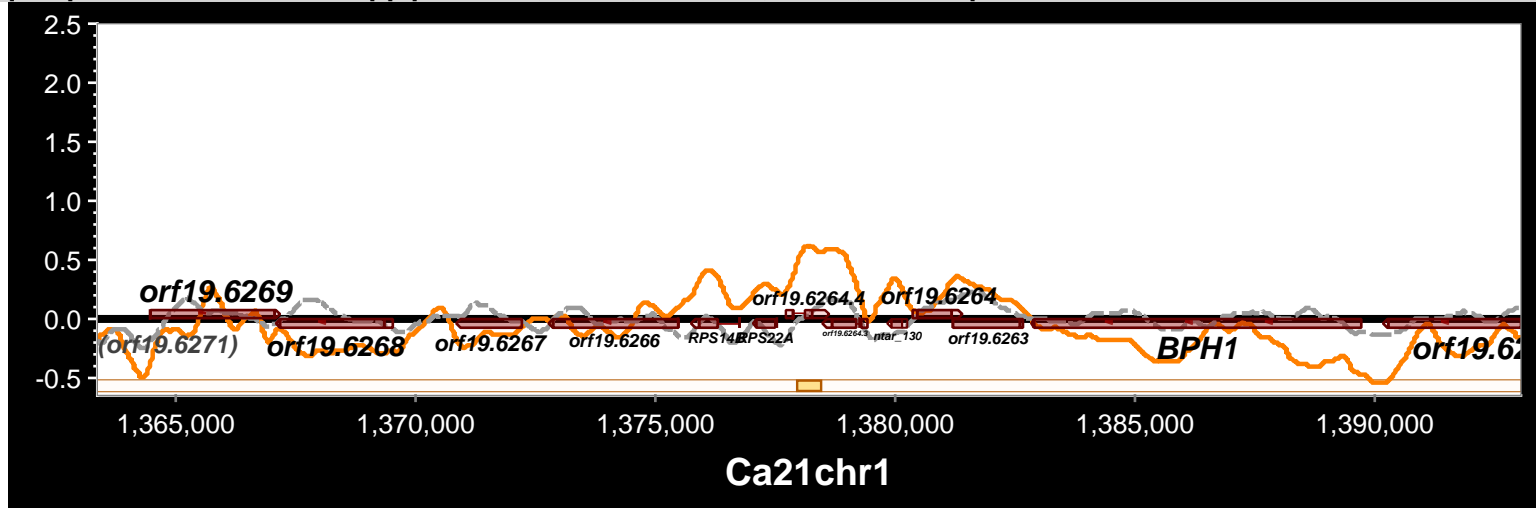

[0.621] Ca21chr4:4118-33801 [+] [RBT5, PGA7, FRP1, orf19.5633, HIS4]

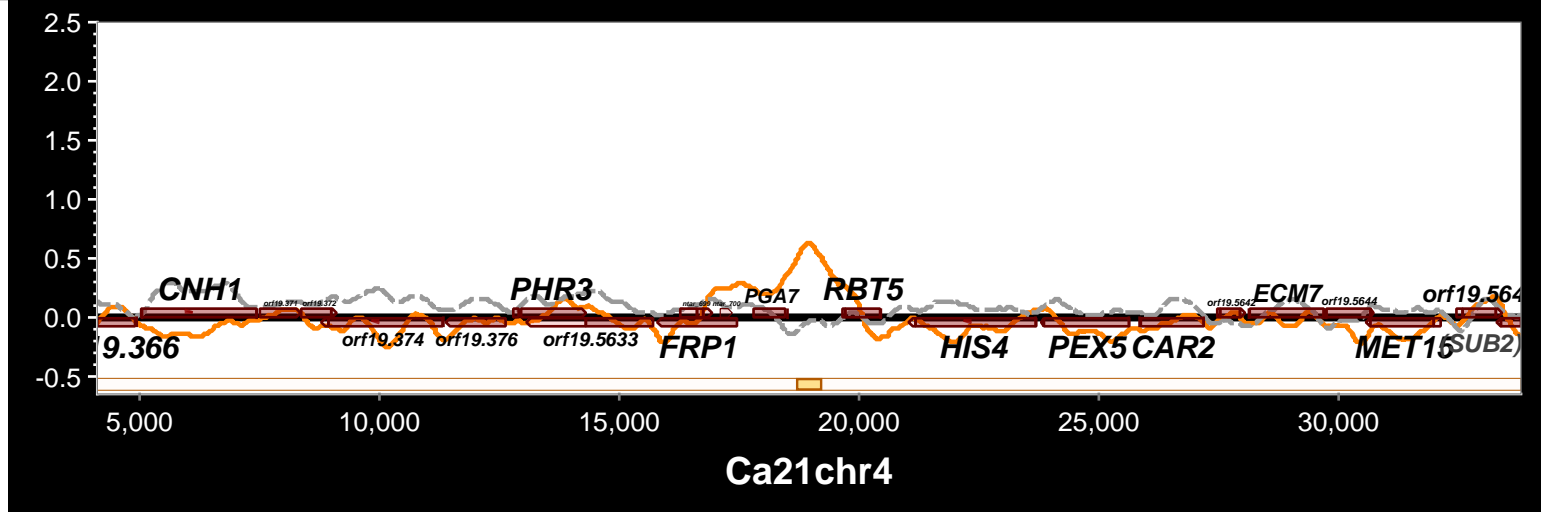

[0.621] Ca21chr7:477110-506793 [+] [orf19.6487, LDG3, orf19.6488, orf19.6484, FMP45]

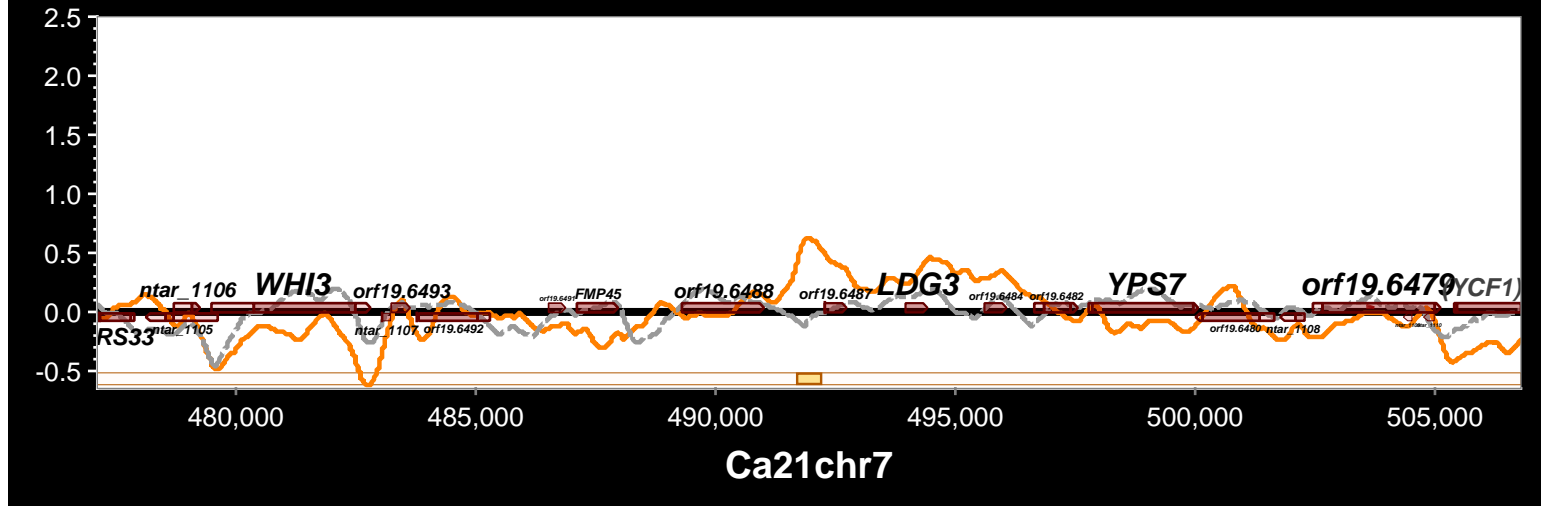

[0.62] Ca21chr4:858699-888382 [+] [PGA30, PGA31, orf19.5304, orf19.5300, RHD3]

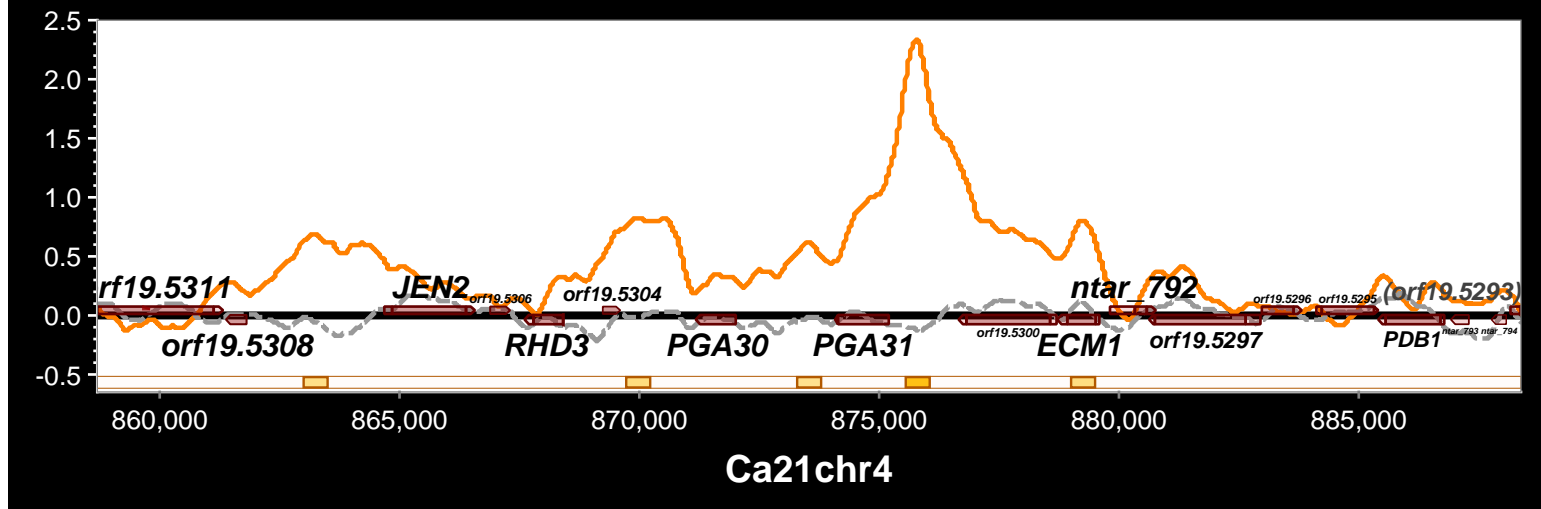

[0.616] Ca21chrR:1561760-1591443 [+] [orf19.6147, CLG1, orf19.6148, orf19.6143, ARC15]

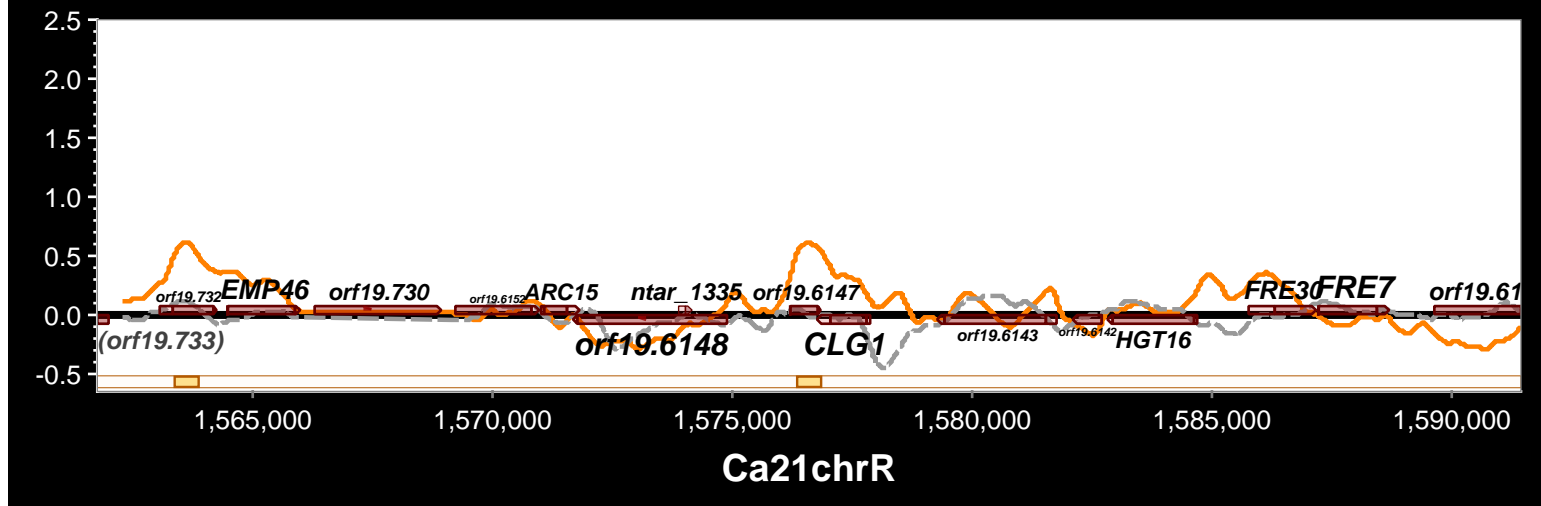

[0.613] Ca21chr2:1126981-1156664 [+] [RPS8A, orf19.6873.1, orf19.6872, tS(AGA)4, orf19.6871]

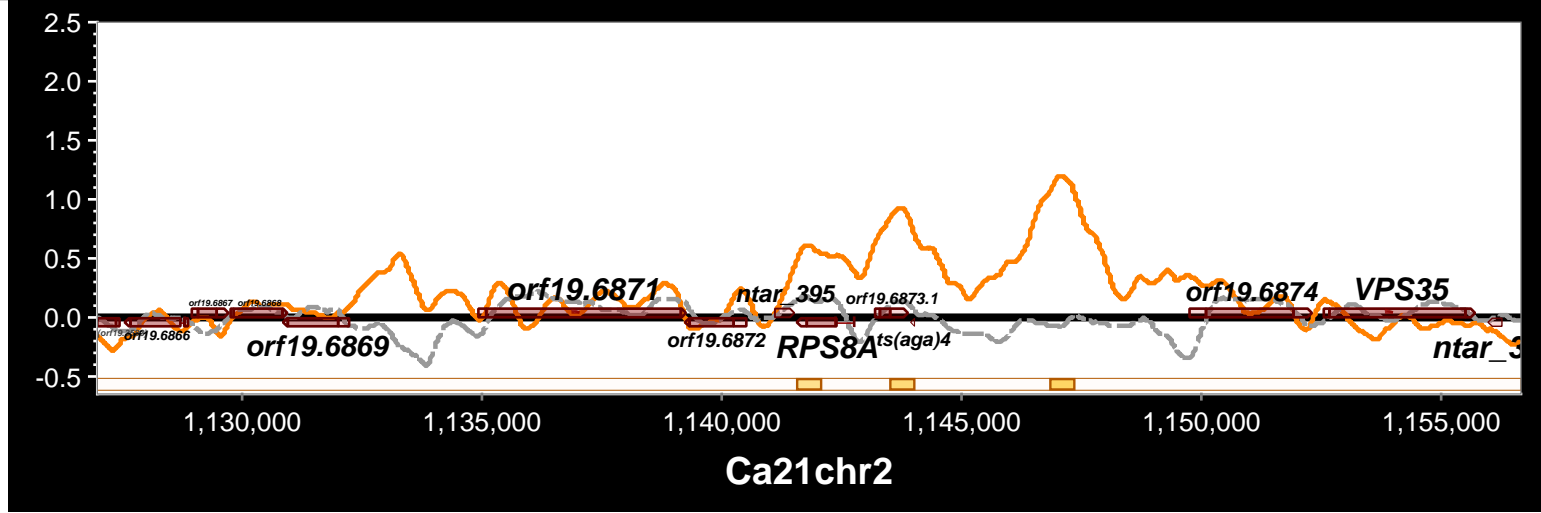

[0.612] Ca21chr3:261866-291549 [+] [NCE103, orf19.1720, orf19.1722, orf19.1723, orf19.1724]

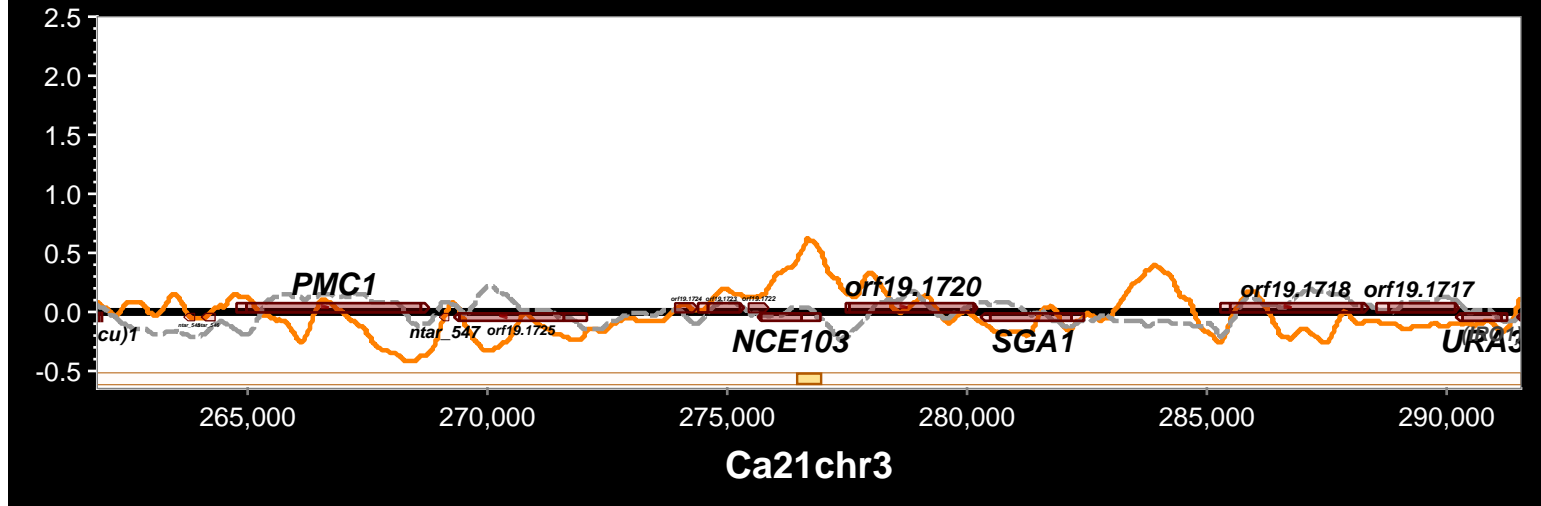

[0.611] Ca21chr1:436621-466304 [+] [orf19.3671, GAL1, GAL10, orf19.3673, GAL102]

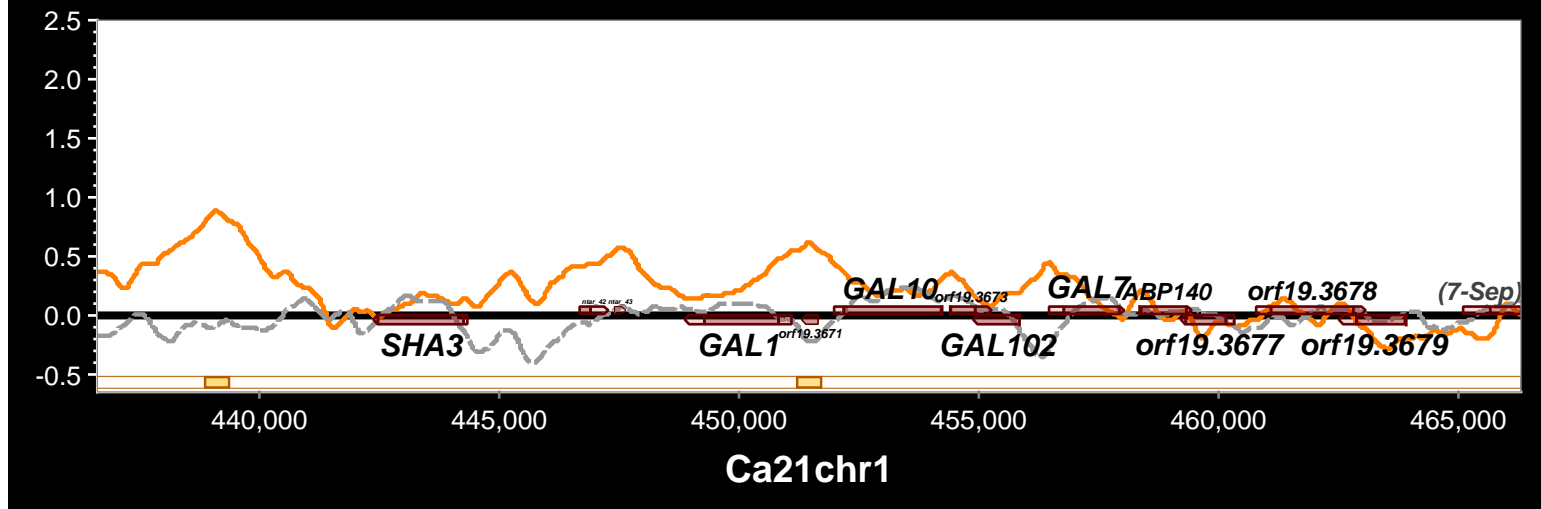

[0.611] Ca21chr6:896427-926110 [+] [orf19.77.1, orf19.4553, SPB1, ALS4, SEC5]

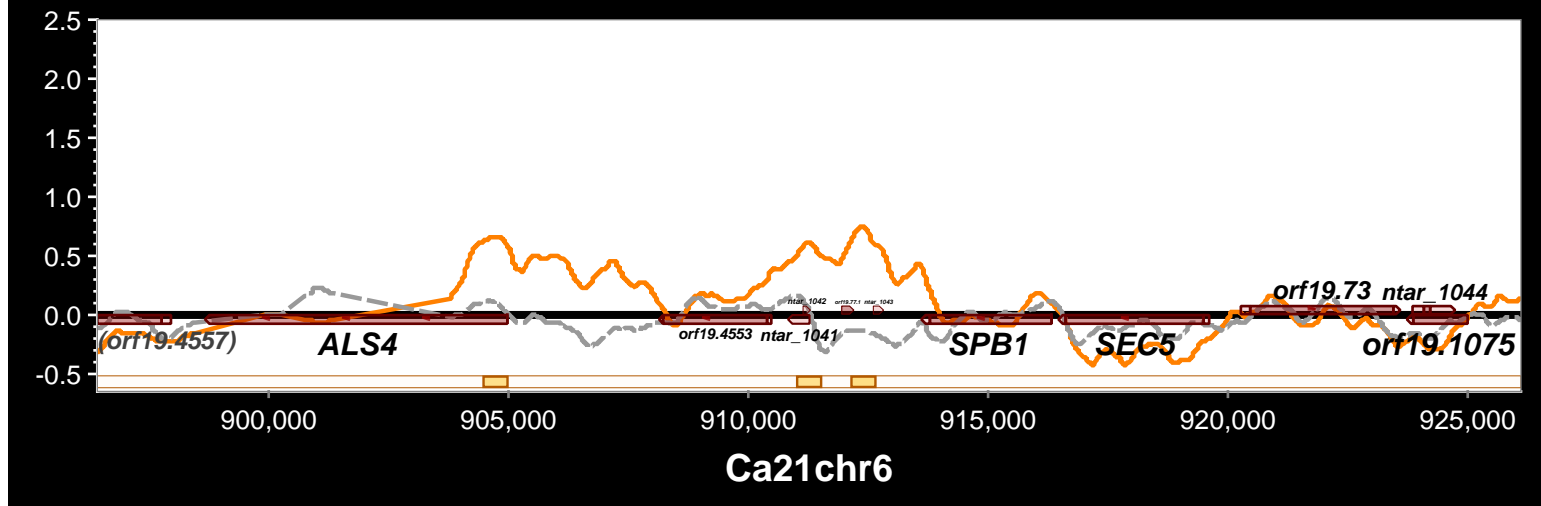

[0.61] Ca21chrR:1772835-1802518 [+] [tk(UUU)4, tk(UUU)3, tk(UUU)5, ACO1, HSP104]

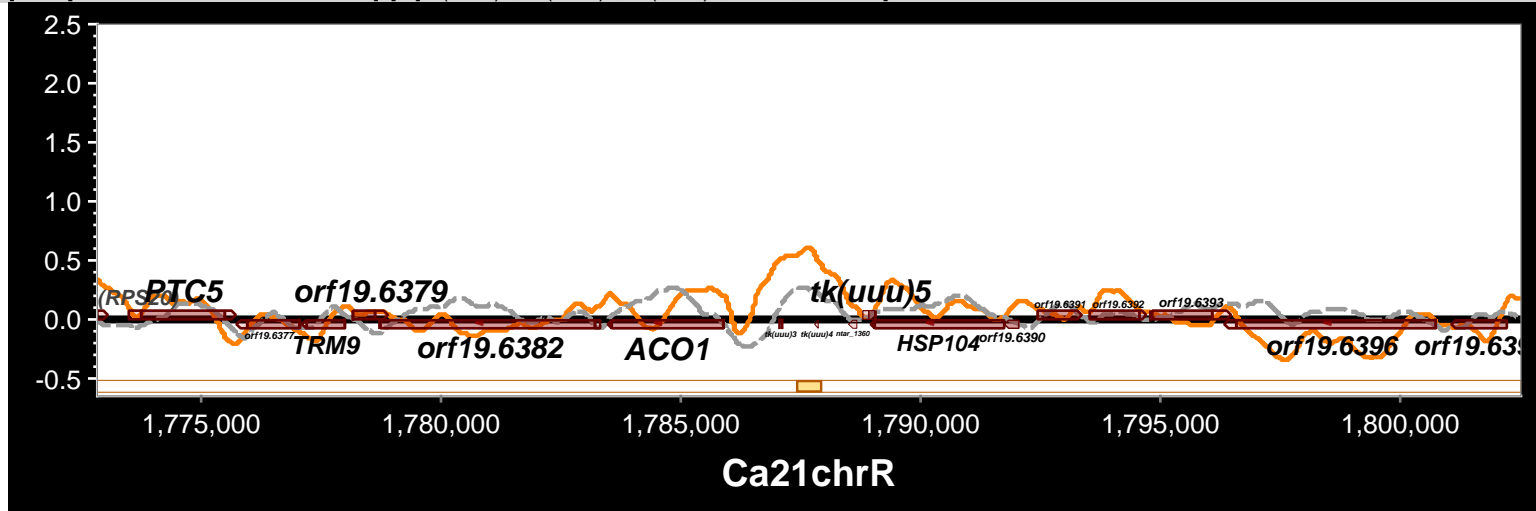

[0.61] Ca21chr1:2179006-2208689 [+] [SWE1, SFU1, DBP3, ERO1, orf19.4872]

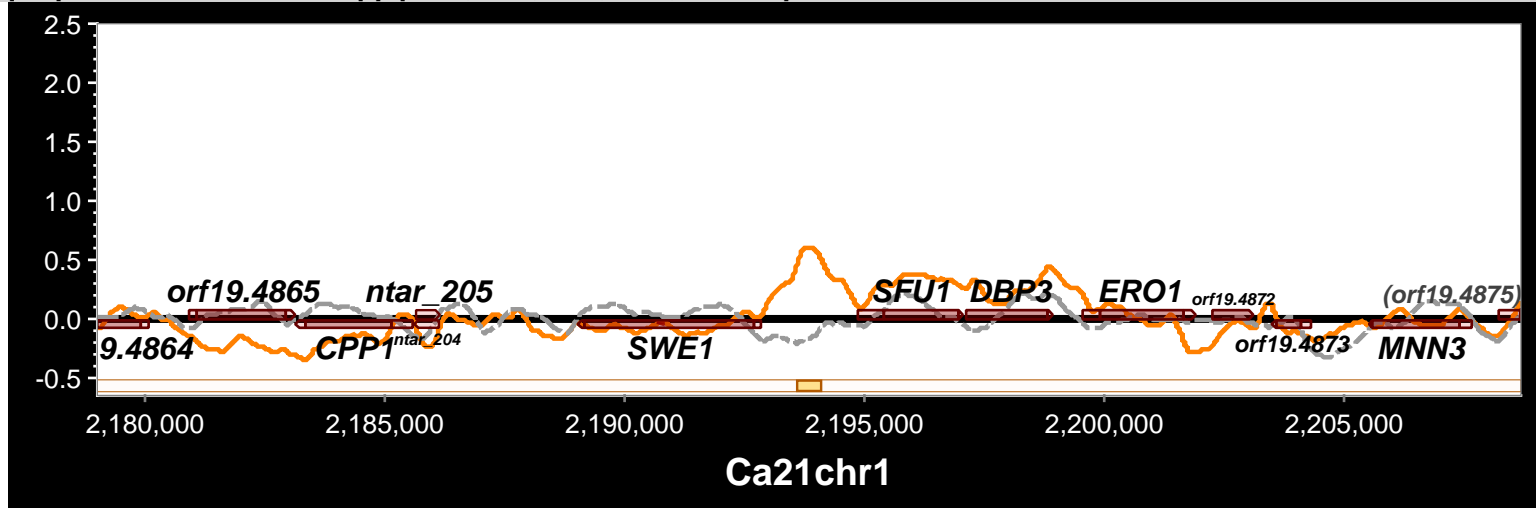

[0.61] Ca21chr3:1199562-1229245 [+] [orf19.6983, orf19.6982, orf19.6981, orf19.6980, orf19.6984]

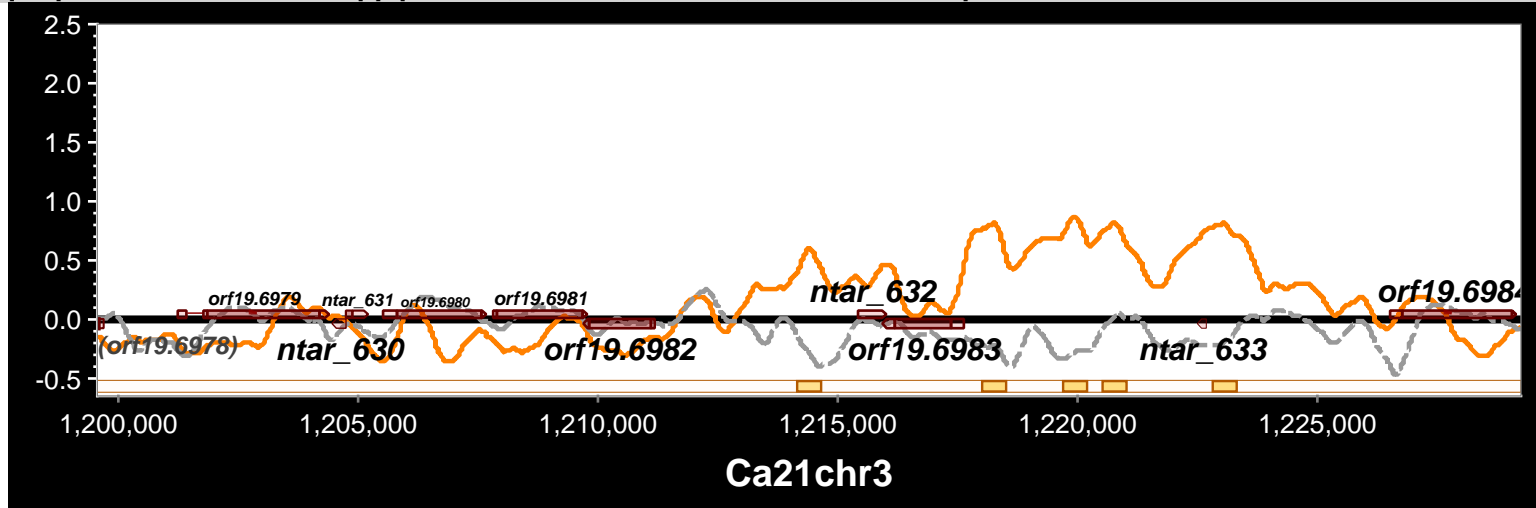

[0.61] Ca21chrR:1548781-1578464 [+] [orf19.732, EMP46, orf19.733, orf19.730, GLK1]

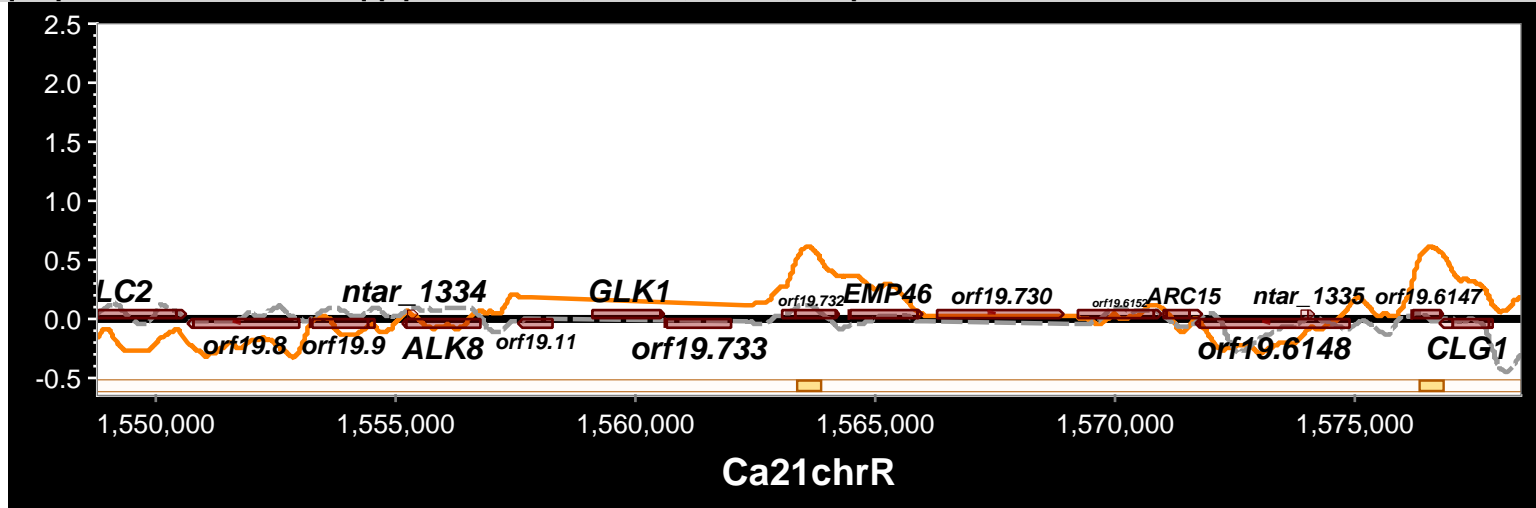





[0.6] Ca21chr3:1709467-1739150 [+] [orf19.6736, TCC1, orf19.6737, tF(GAA)5, tR(UCU)5]

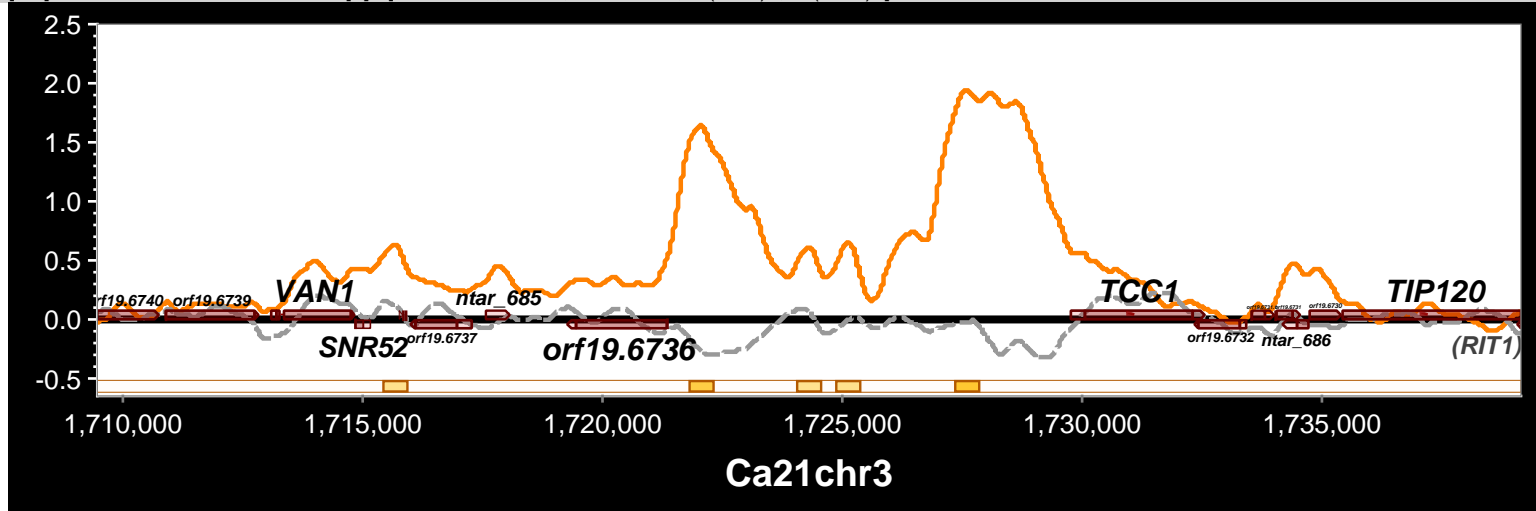

[0.6] Ca21chr6:149802-179485 [+] [GPX2, orf19.86, CAN3, GPX1, SUN41]

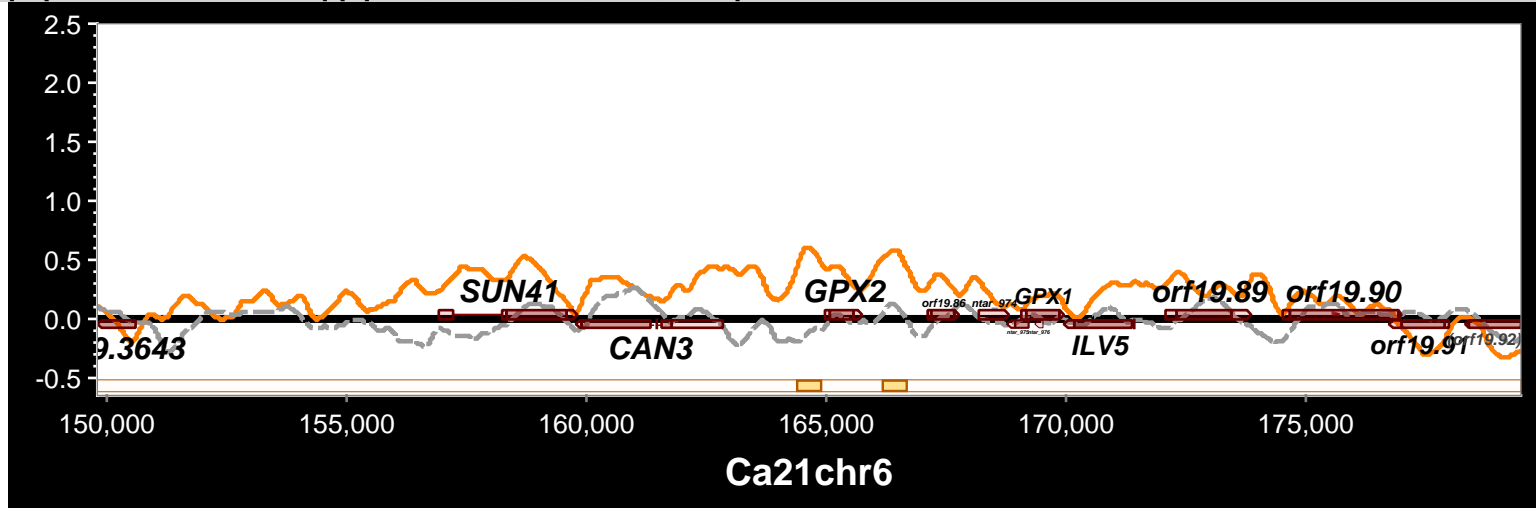

[0.6] Ca21chr6:342425-372108 [+] [RPL32, ACF2, PTK2, orf19.3418, MAE1]

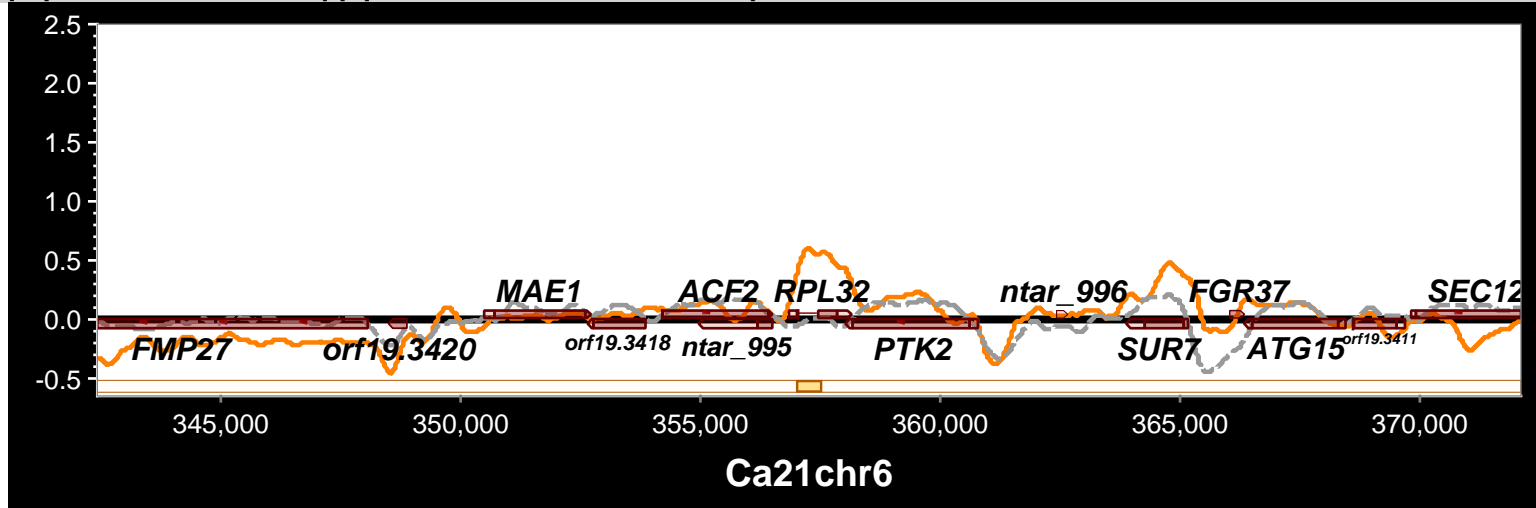

[0.593] Ca21chr5:237677-267360 [+] [orf19.1959, CLN3, CYC3, orf19.1956, orf19.1955]

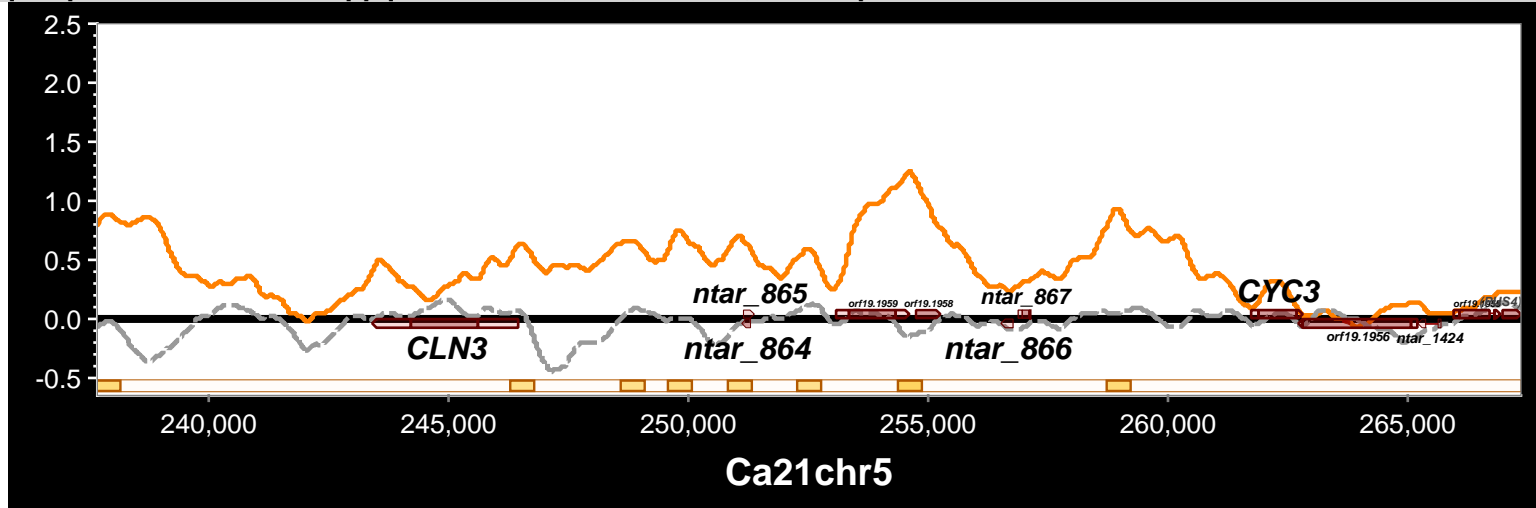

[0.592] Ca21chr1:1865162-1894845 [+] [VCX1, ERG1, PCL2, GCD6, orf19.409]

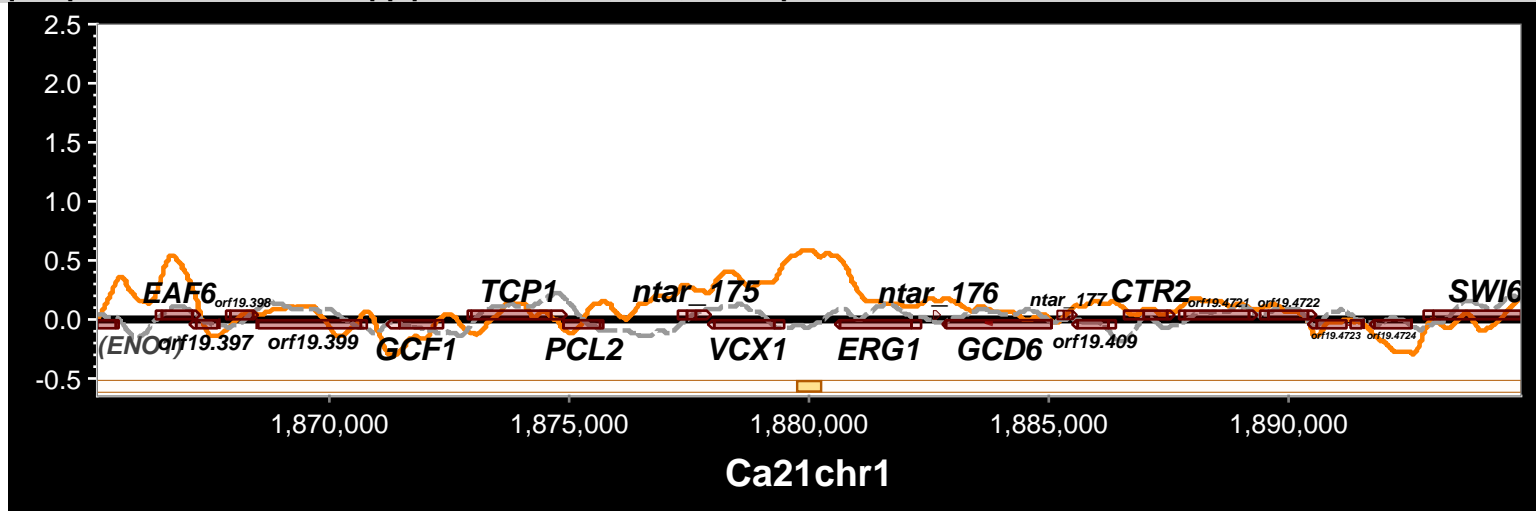

[0.591] Ca21chr4:1570915-1600598 [+] [UBI3, orf19.3086, orf19.3087.1, orf19.3087.2, orf19.3088]

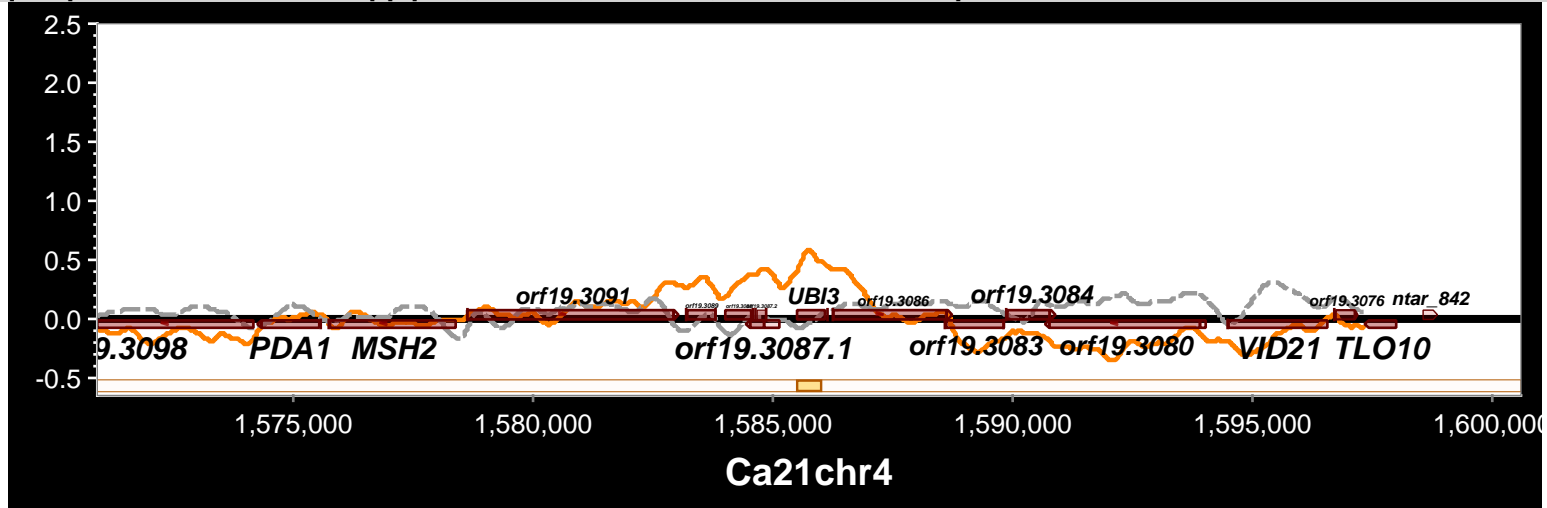

[0.59] Ca21chr2:645146-674829 [+] [STP4, orf19.909.1, orf19.910, FEN12, TOM1]

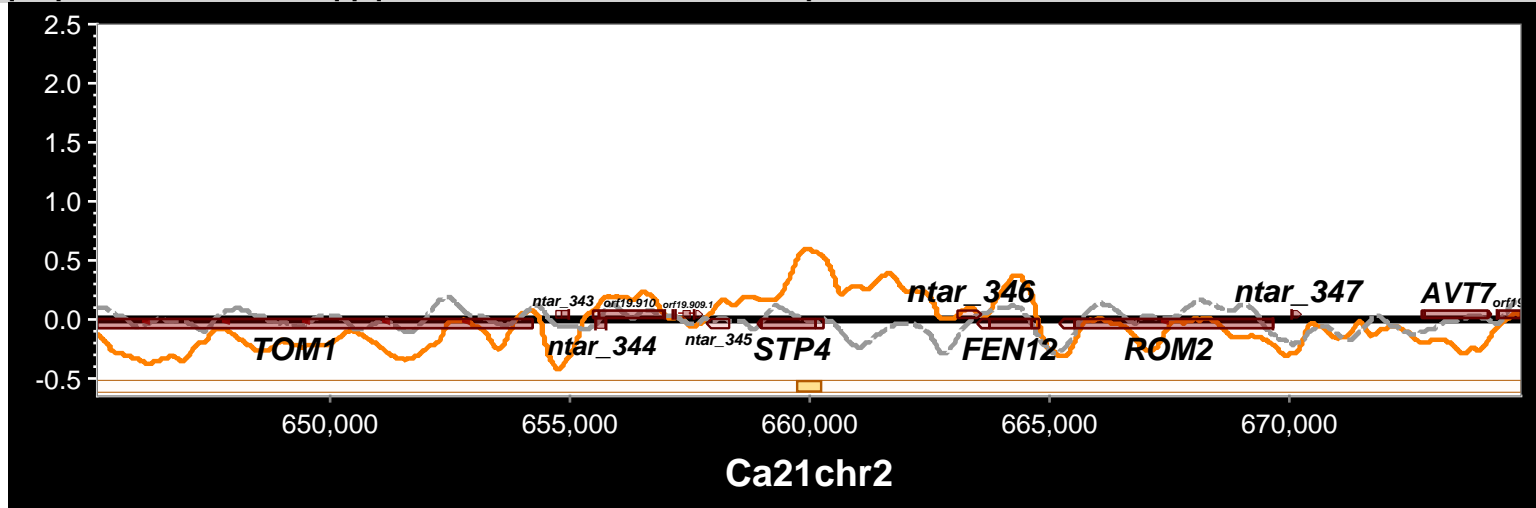

[0.59] Ca21chr3:116300-145983 [+] [PMA1, orf19.5381, orf19.5382, CHS8, LYS144]

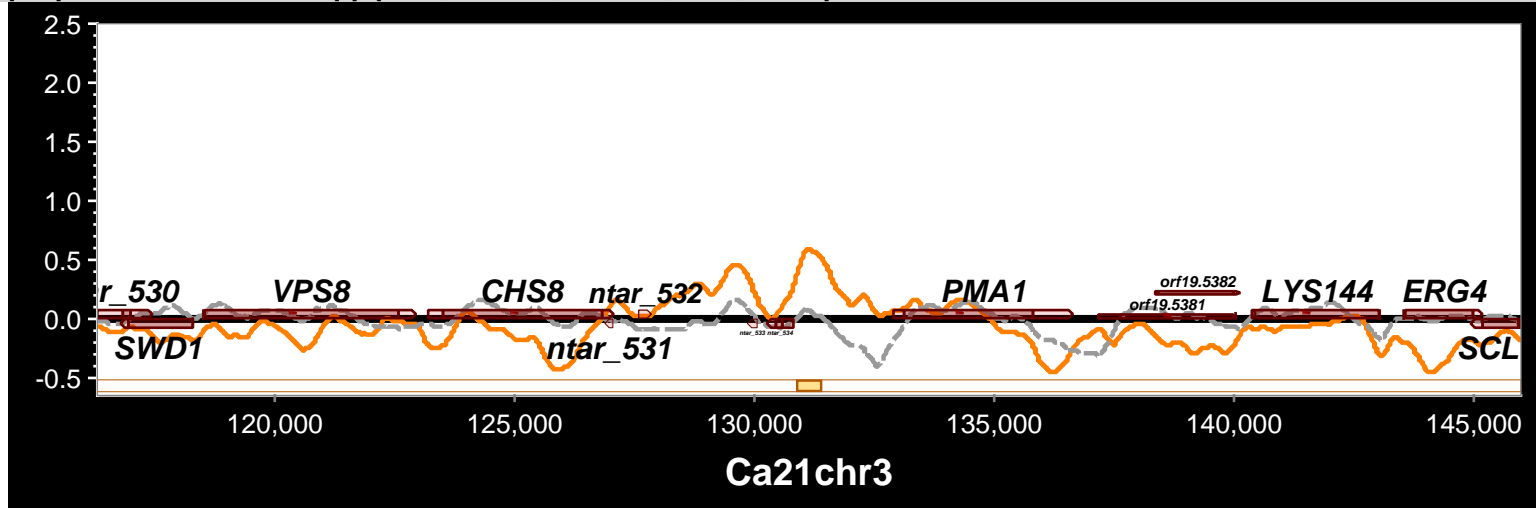

[0.59] Ca21chr3:841407-871090 [+] [SBP1, orf19.913.2, orf19.5854.1, CDR11, MBP1]

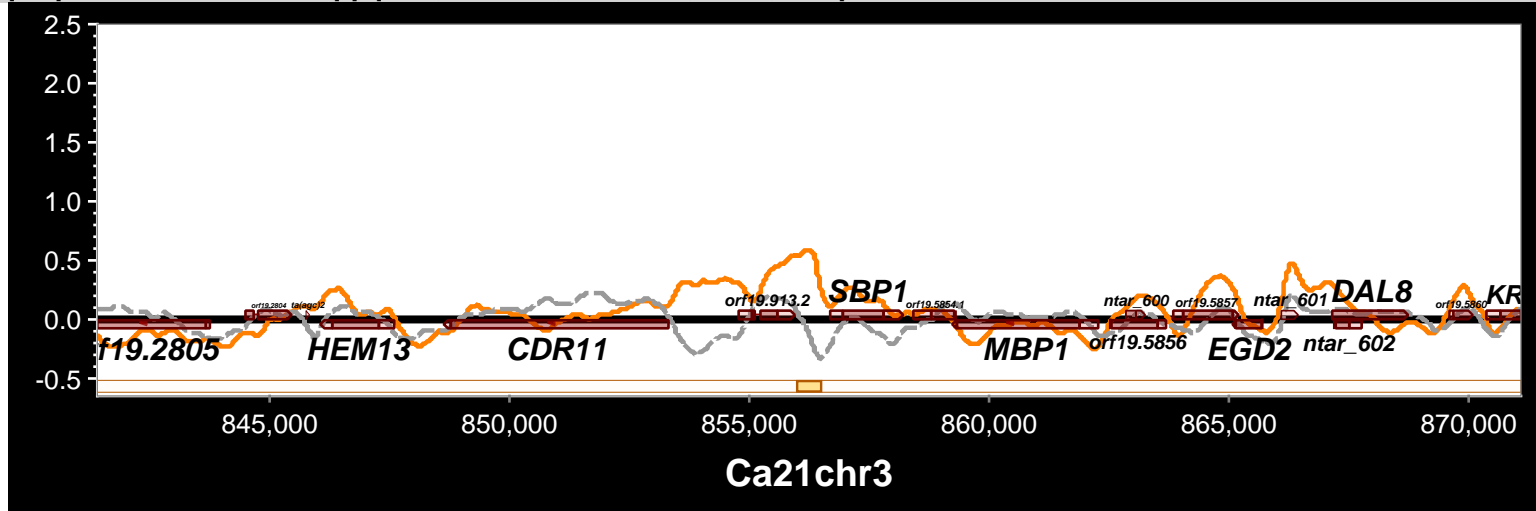

[0.59] Ca21chr3:1553951-1583634 [+] [FCR1, orf19.6816, TDH3, orf19.6813, tW(CCA)2]

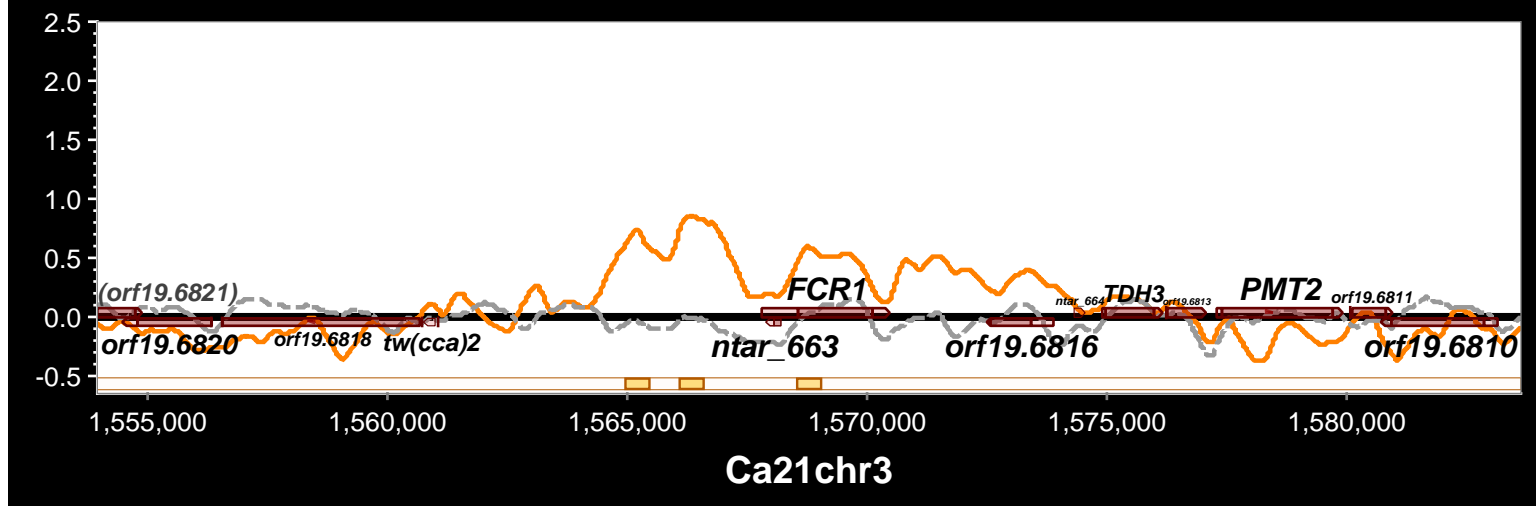

[0.59] Ca21chr4:1410823-1440506 [+] [orf19.2892, orf19.2893, VMA8, orf19.2891, SOU1]

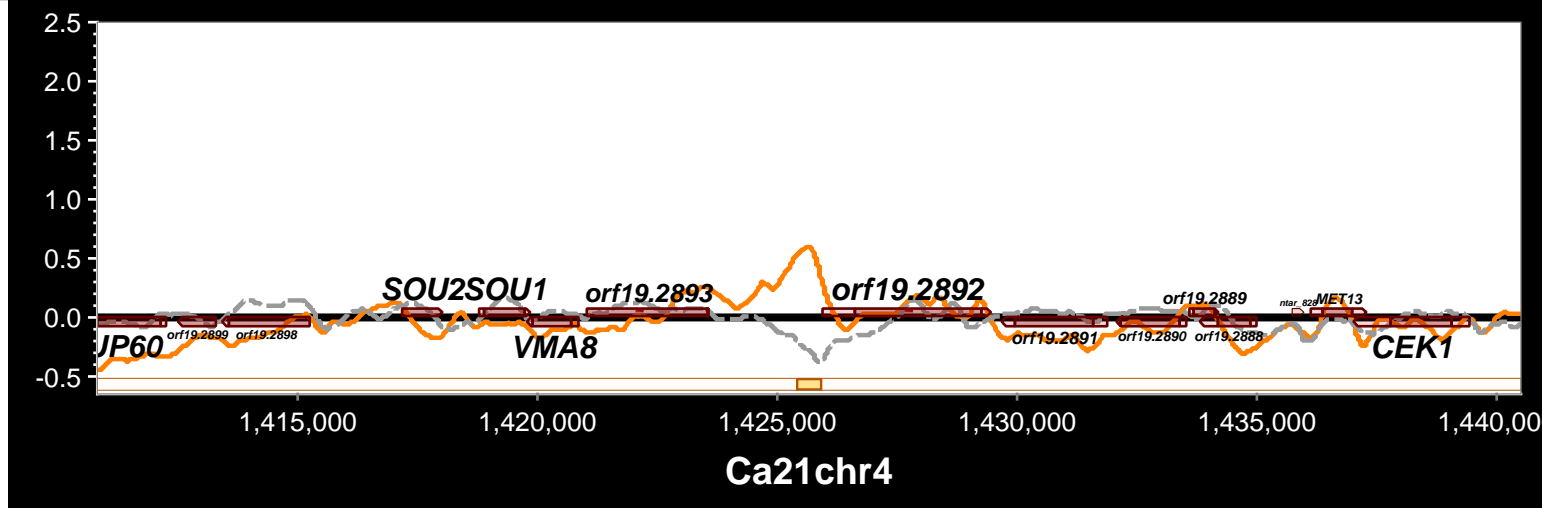

[0.59] Ca21chr5:761406-791089 [+] [orf19.2637, orf19.6654, orf19.2638, DUR3, tE(UUC)5]

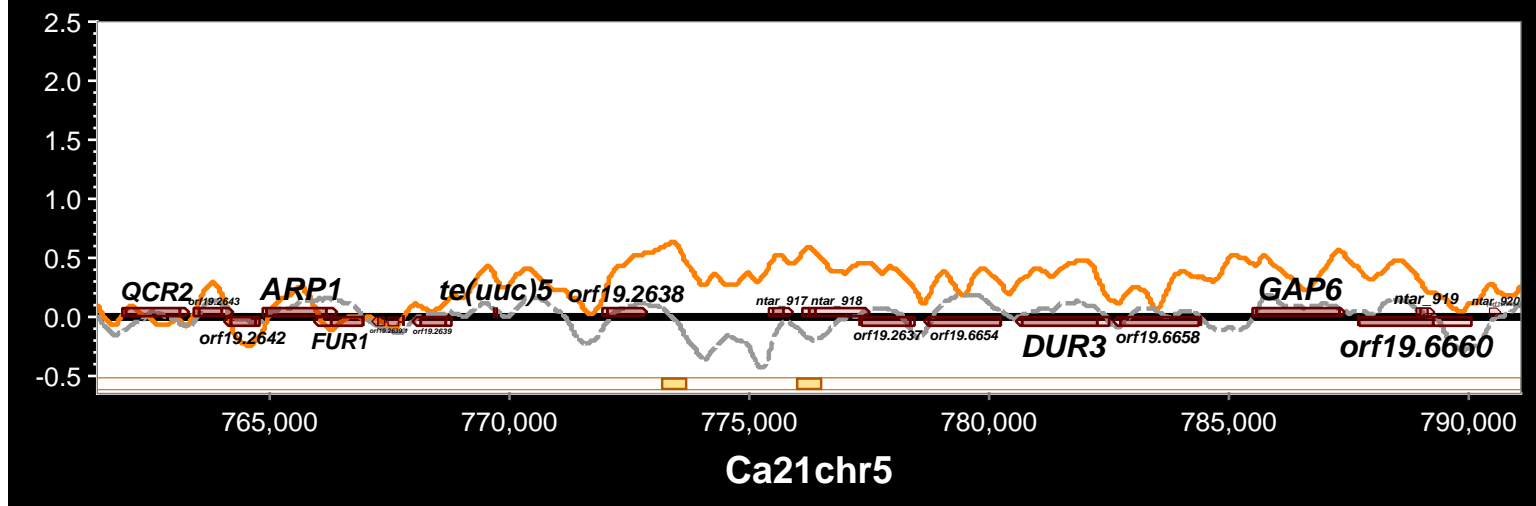

[0.59] Ca21chr5:1063406-1093089 [+] [orf19.3982, MAL31, orf19.3980, orf19.3983, orf19.3984]

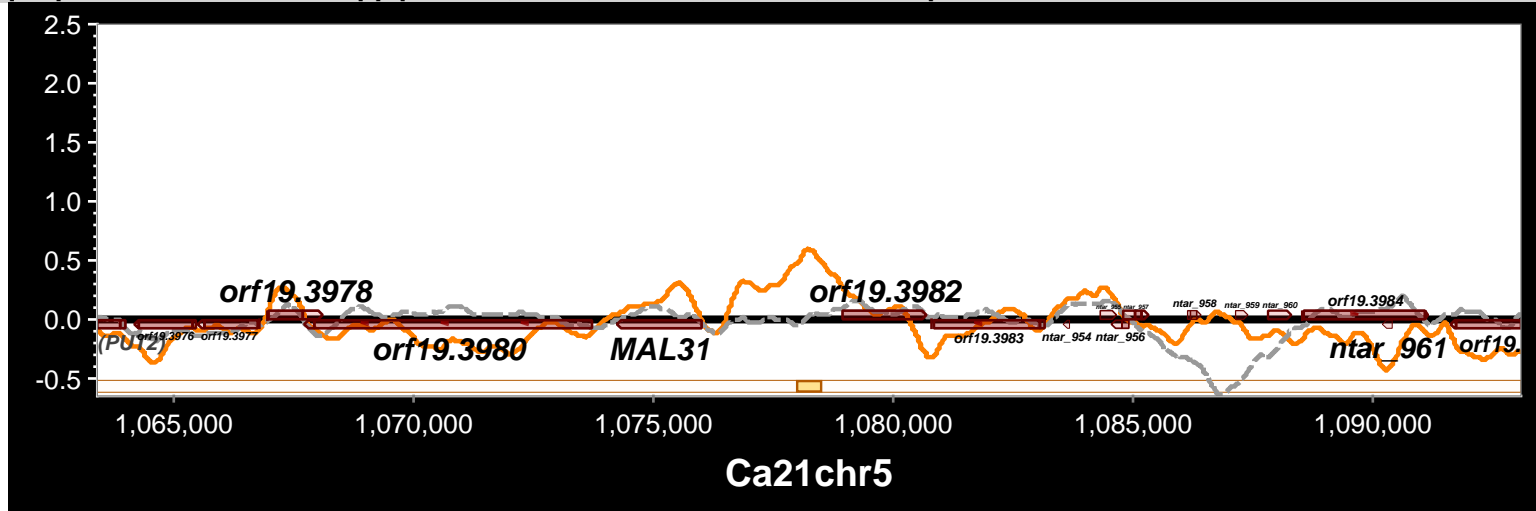

[0.59] Ca21chr7:363588-393271 [+] [orf19.6547, ISU1, LPI9, orf19.6550, orf19.6551]

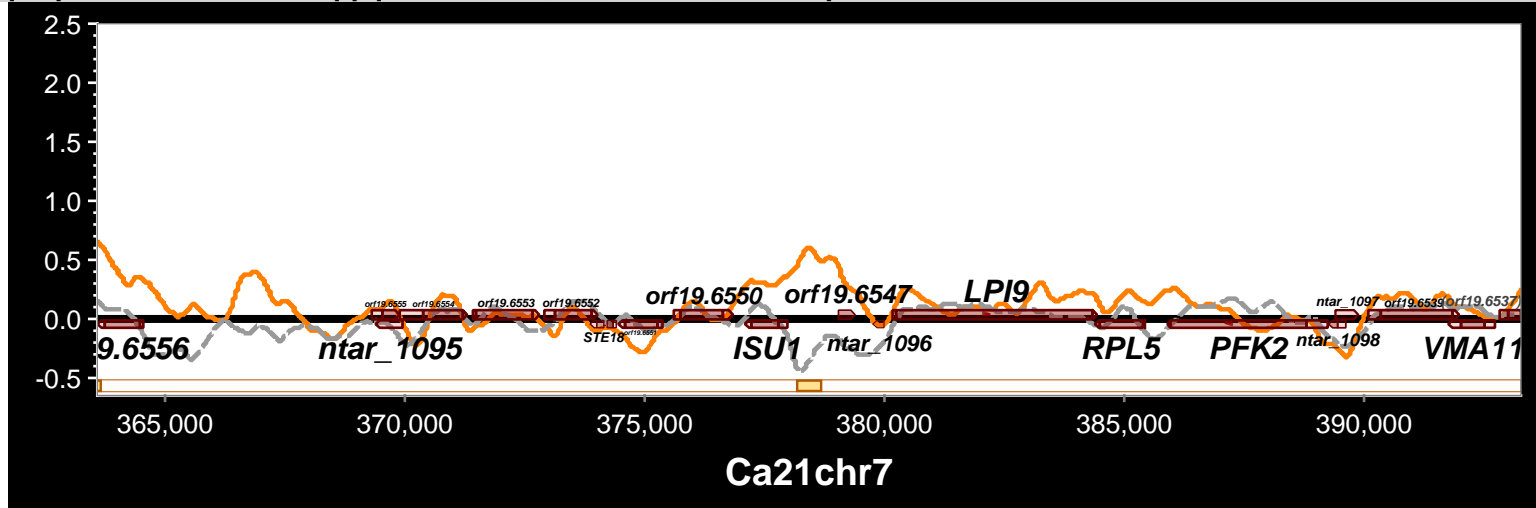

[0.59] Ca21chr7:410873-440556 [+] [CEN7, orf19.6524, orf19.6525, orf19.6522, orf19.6526]

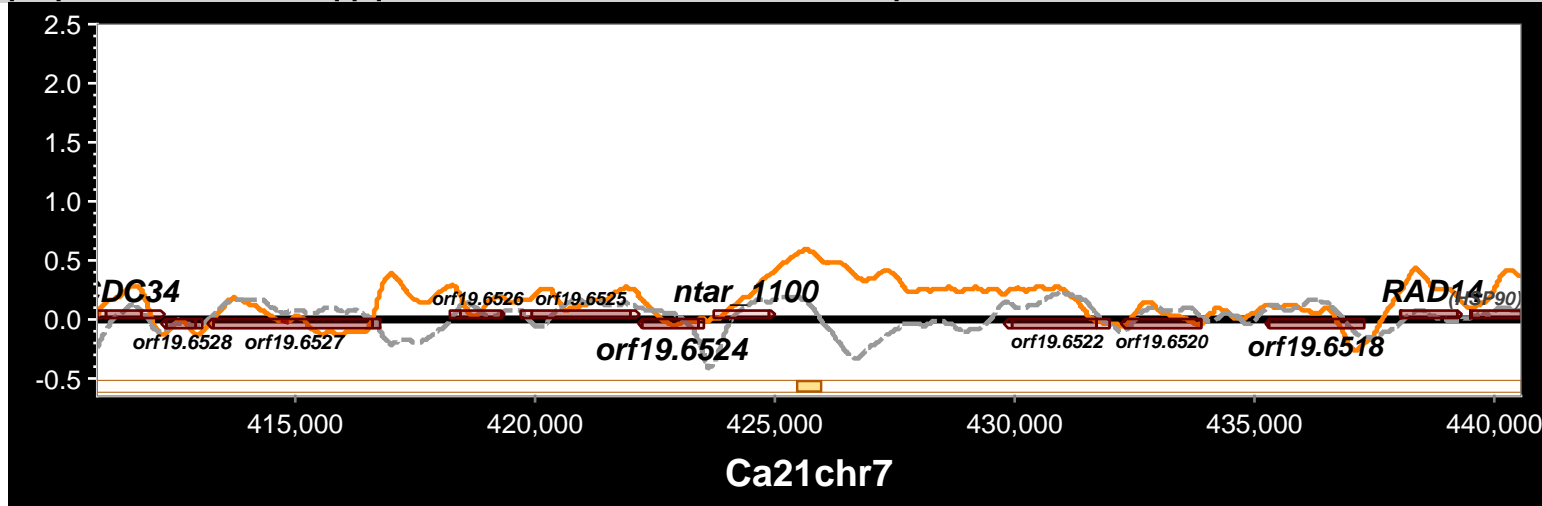

[0.59] Ca21chrR:1874782-1904465 [+] [RDN5, RDN18, RDN58, RDN25, TAR1]

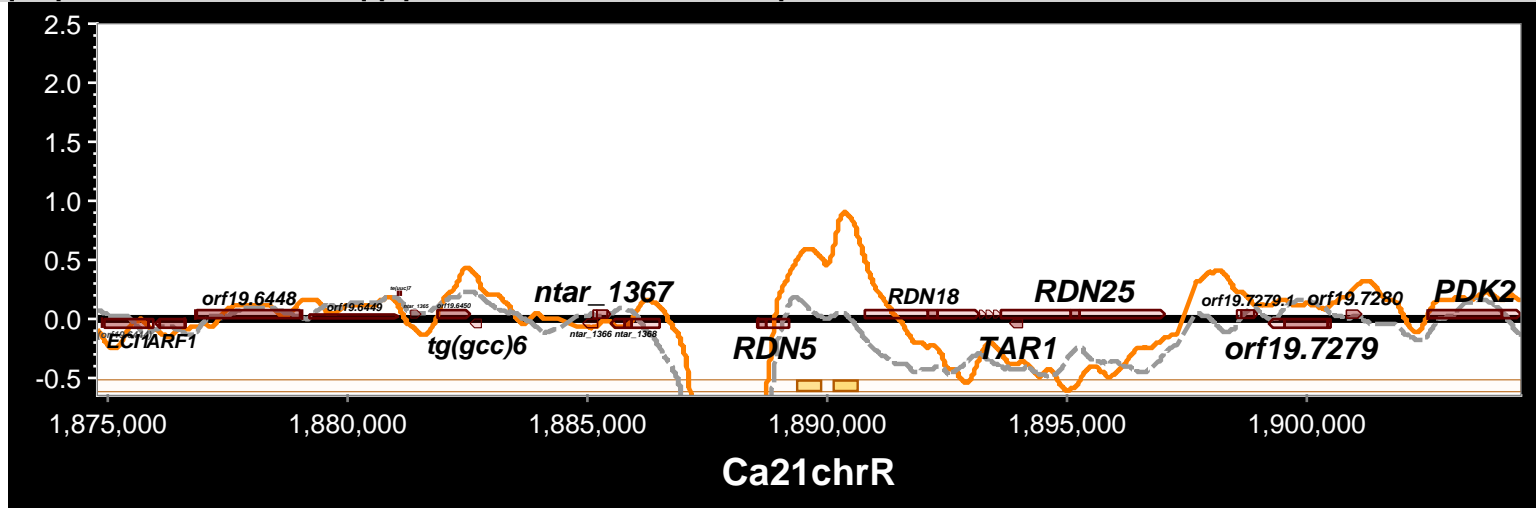

[0.585] Ca21chrR:1027462-1057145 [+] [orf19.6311, RPS3, MNT4, orf19.6310, orf19.6313.2]

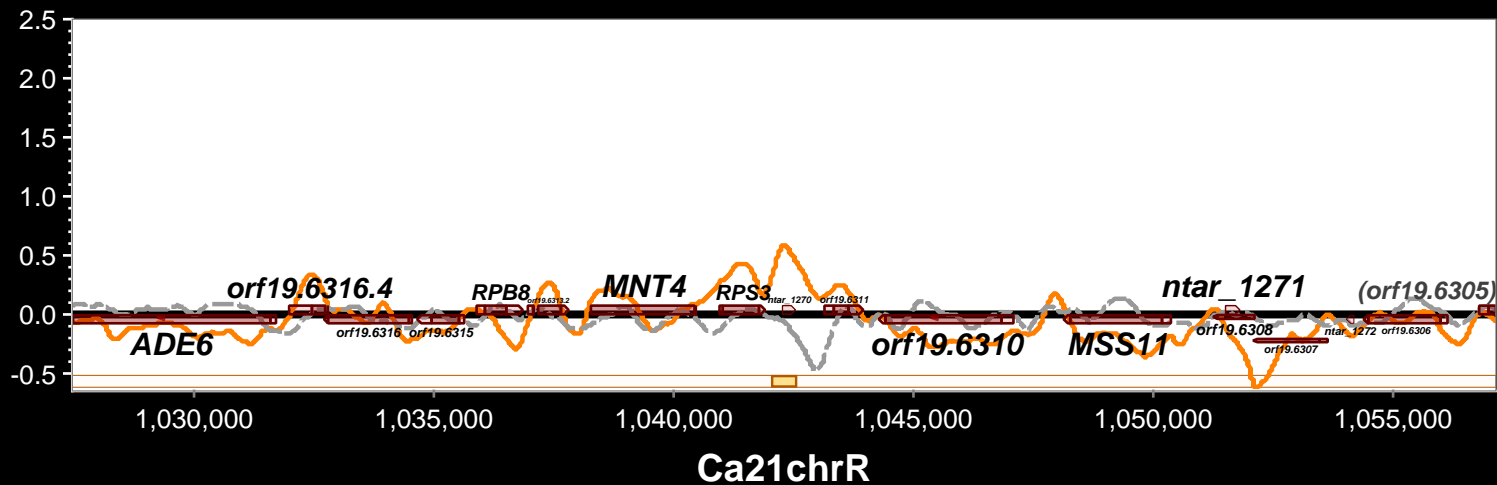

[0.584] Ca21chr3:1591583-1621266 [+] [SSN6, POS5, RPD31, orf19.6802, orf19.6797]

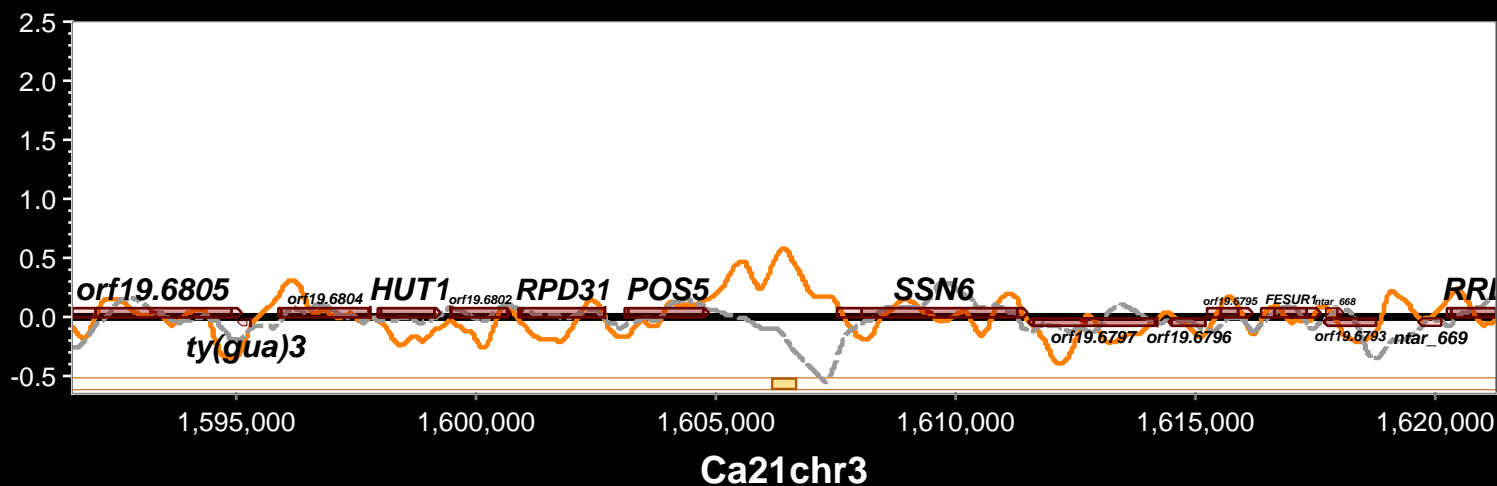

[0.581] Ca21chr1:616028-645711 [+] [RPP1A, RPL13, RPS16A, HOL1, orf19.2995]

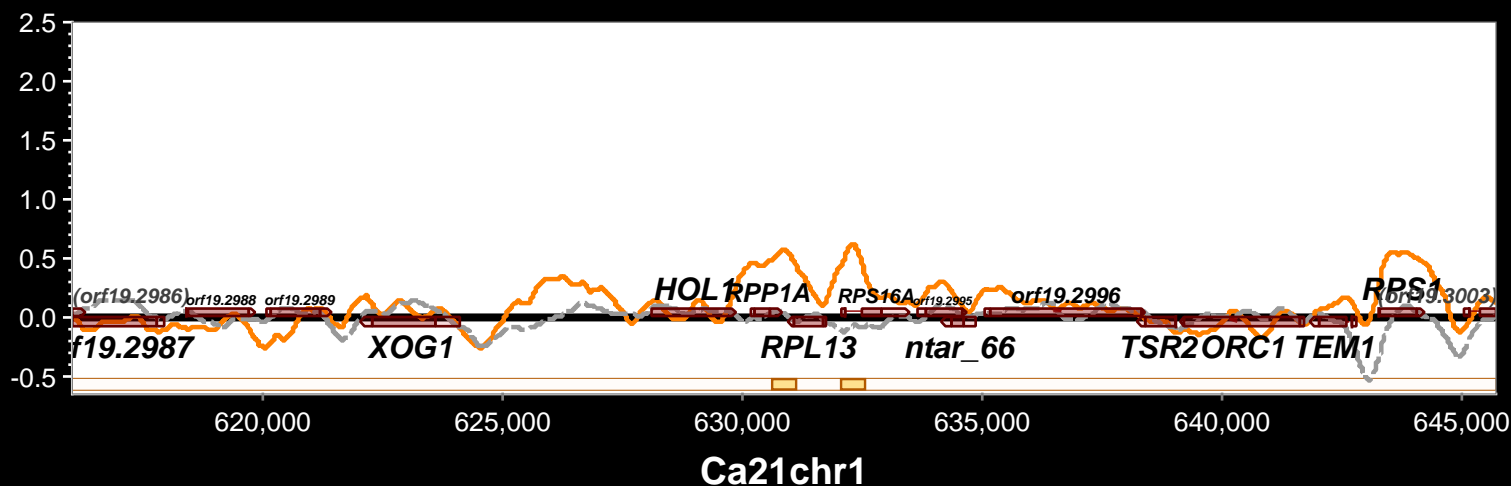

[0.58] Ca21chr1:43274-72957 [+] [orf19.6071, ENA2, orf19.6072, SVF1, HMX1]

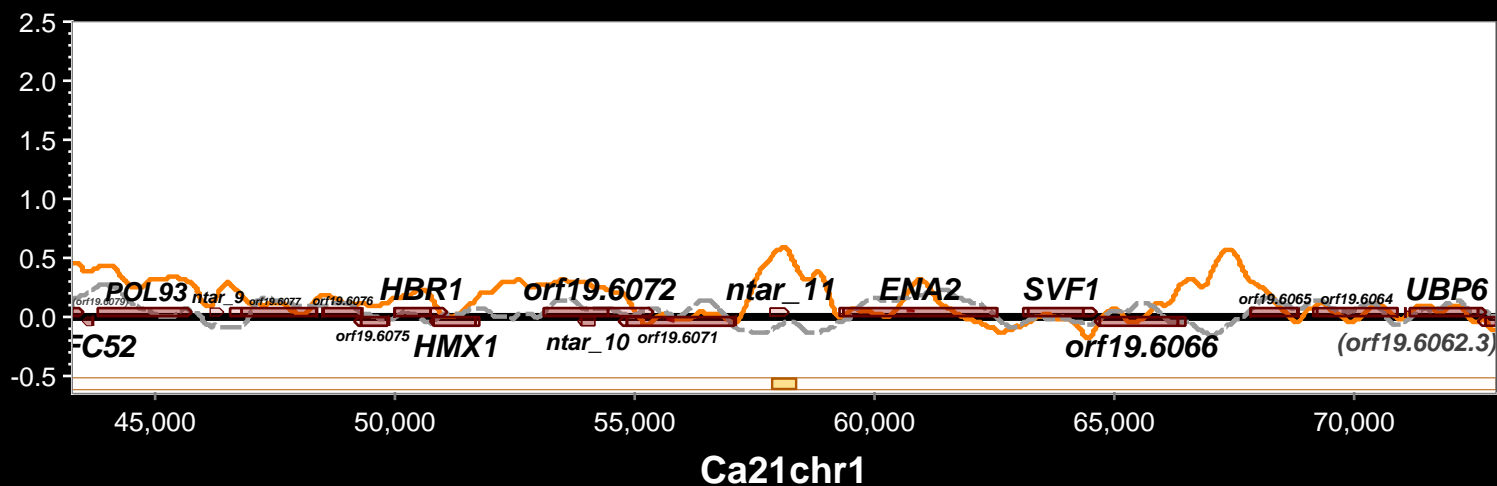

[0.58] Ca21chr2:842979-872662 [+] [SNRNU2, SSY1, orf19.813, DCK1, orf19.811]

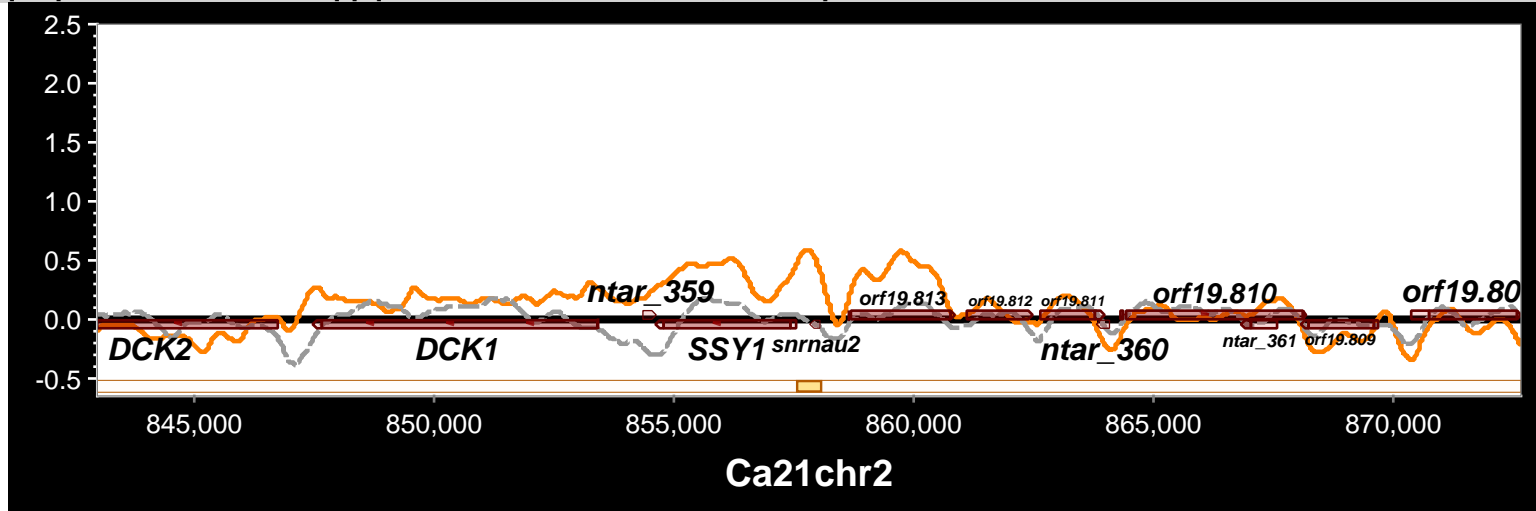

[0.58] Ca21chr2:1319003-1348686 [+] [orf19.34, orf19.31, orf19.30, orf19.35, orf19.29]

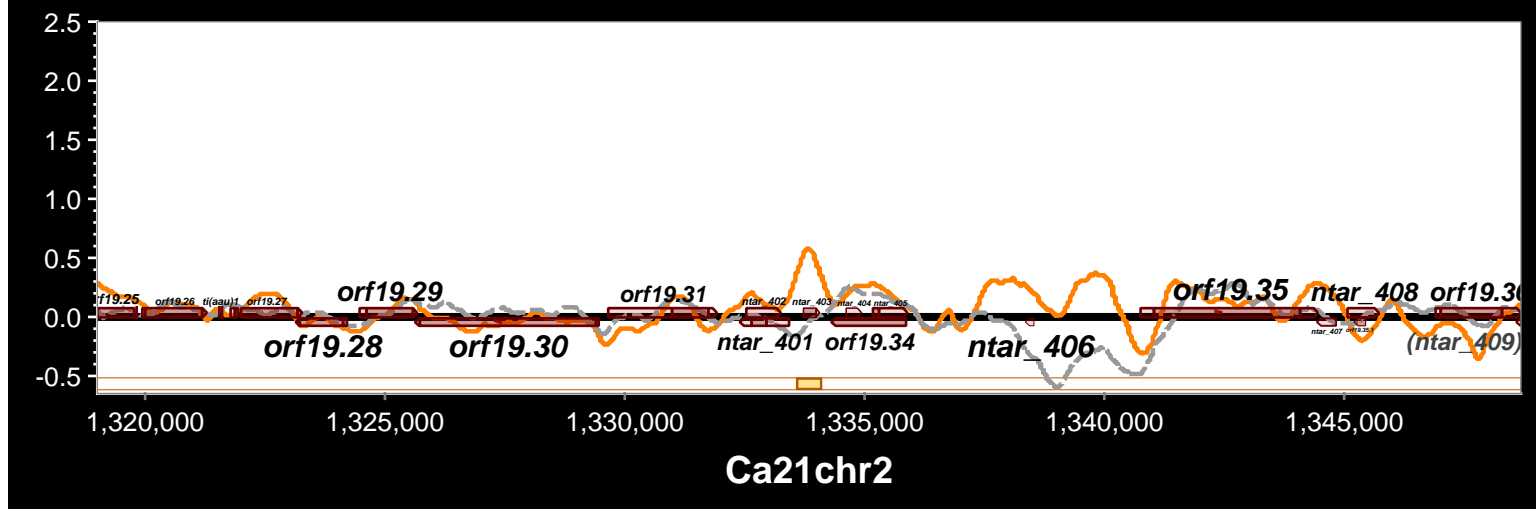

[0.58] Ca21chr2:1910242-1939925 [+] [CEN2, RPL3, orf19.1600, orf19.1599, orf19.1604]

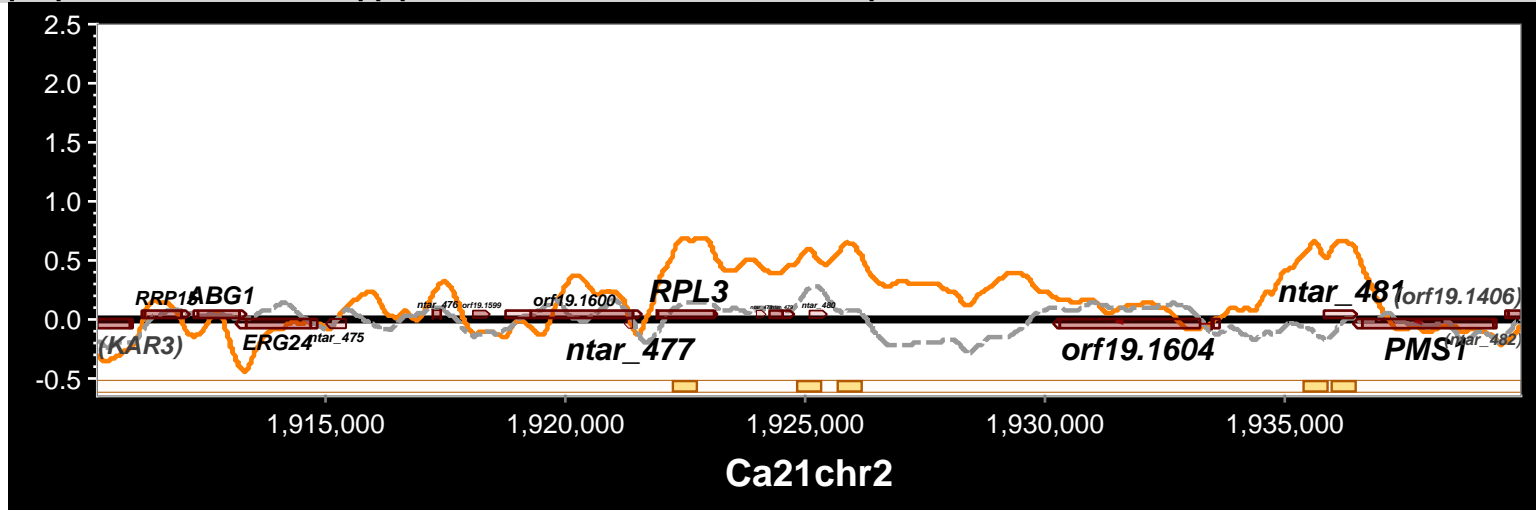

[0.58] Ca21chr3:13430-43113 [+] [HGT19, orf19.5449, orf19.5446, orf19.5450, DAL1]

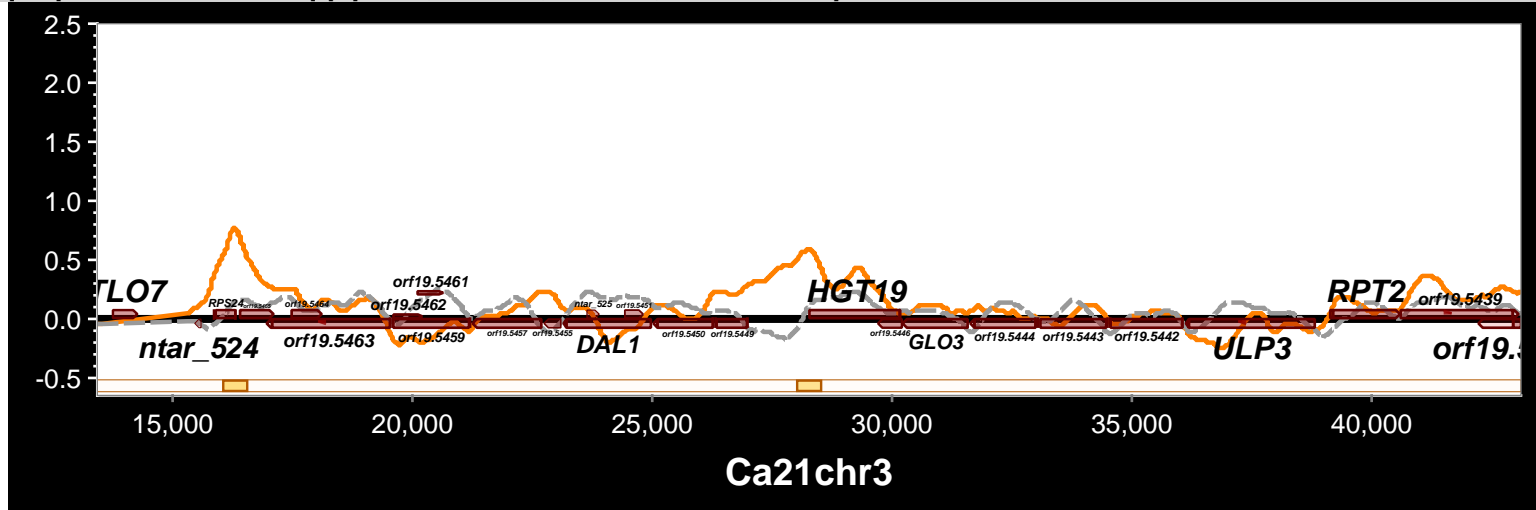

[0.58] Ca21chr3:1633876-1663559 [+] [orf19.6781, BMT1, MET8, PRO2, orf19.6778]

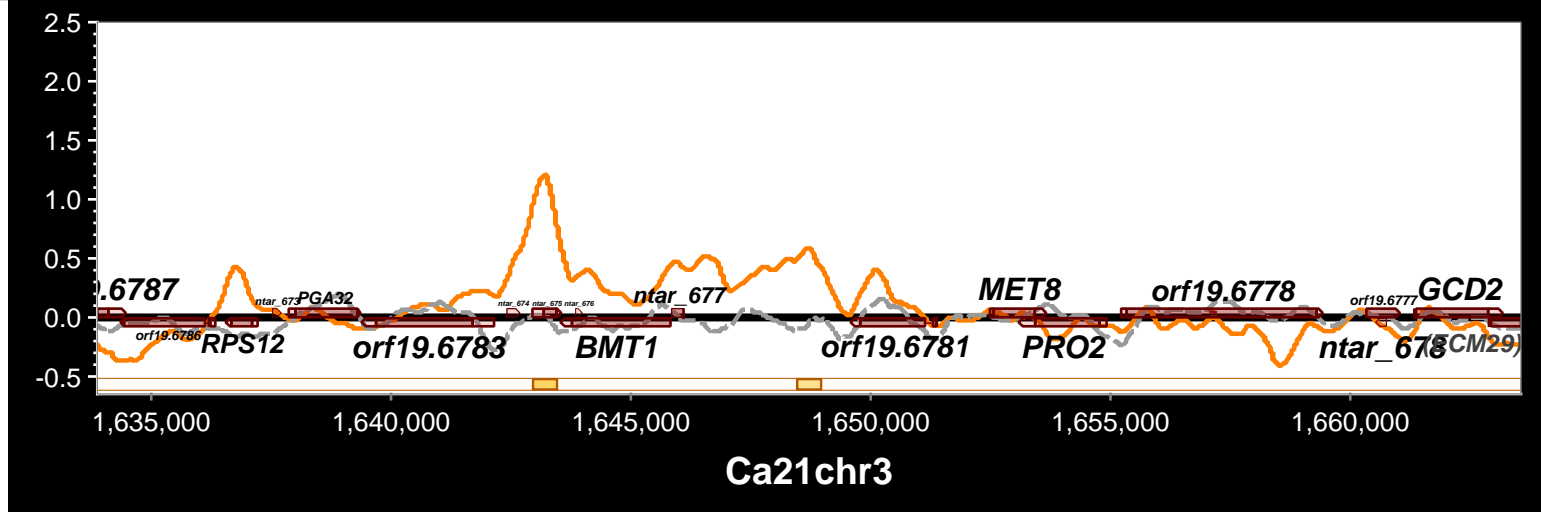

[0.58] Ca21chr4:241104-270787 [+] [RPS6A, orf19.4659, RLM1, orf19.4658, NAT4]

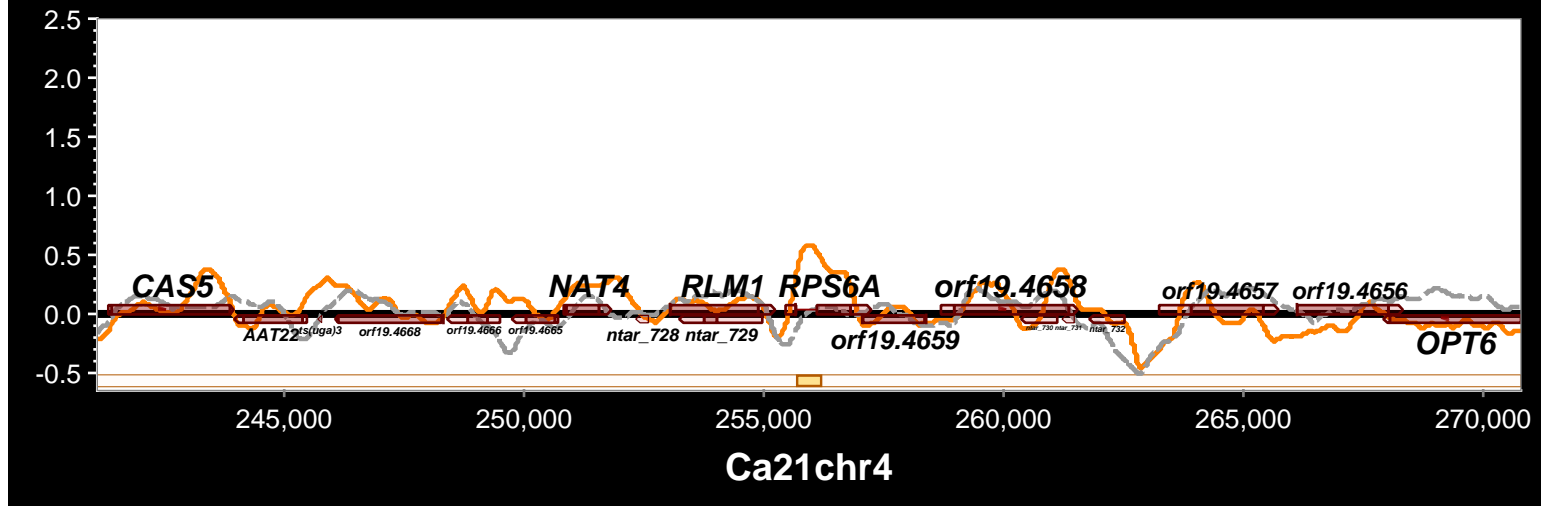

[0.58] Ca21chr6:151587-181270 [+] [orf19.86, GPX2, GPX1, CAN3, ILV5]

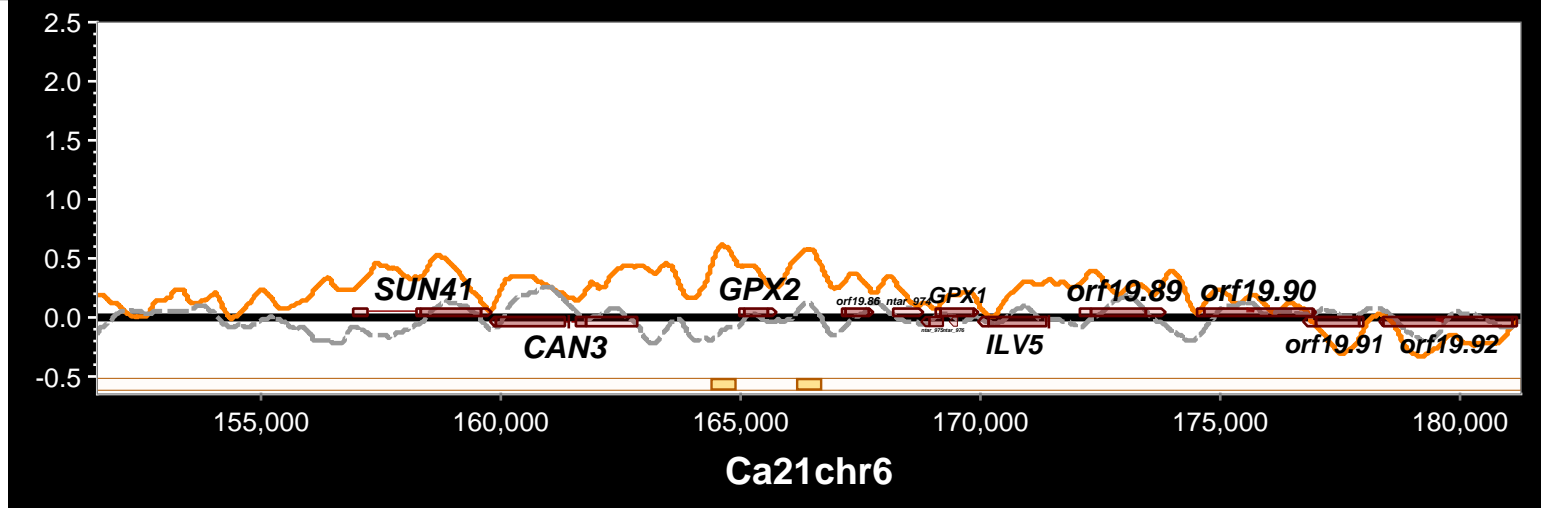

[0.58] Ca21chr6:619391-649074 [+] [SAP5, PEP3, orf19.5586, orf19.5587, PGA60]

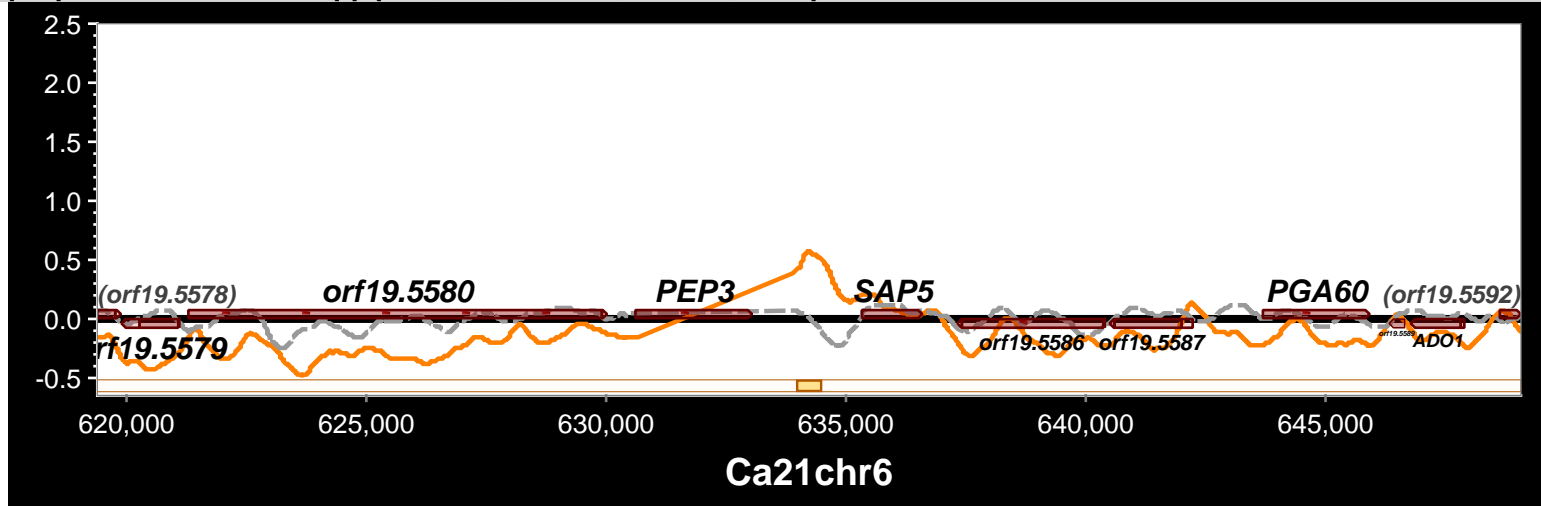



[0.58] Ca21chr6:806481-836164 [+] [HGT10, orf19.5754, orf19.5755, ORM1]

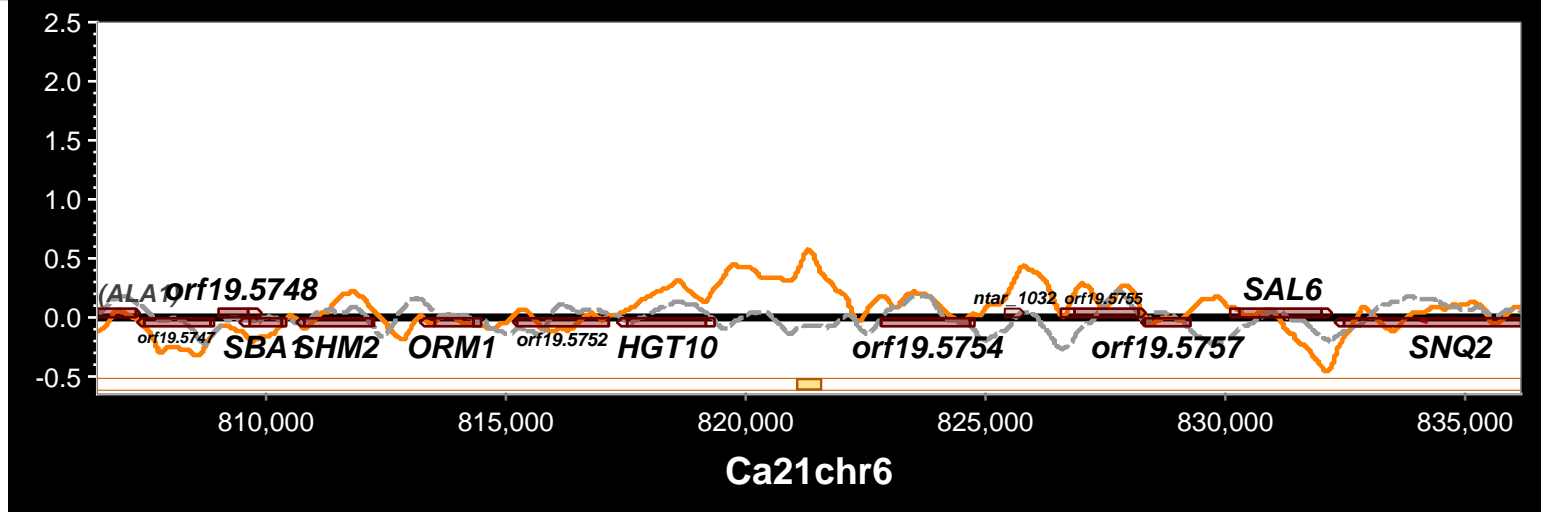

[0.58] Ca21chrR:1674565-1704248 [+] [YHB1, SAP2, orf19.3706, PTC6, orf19.3704.1]

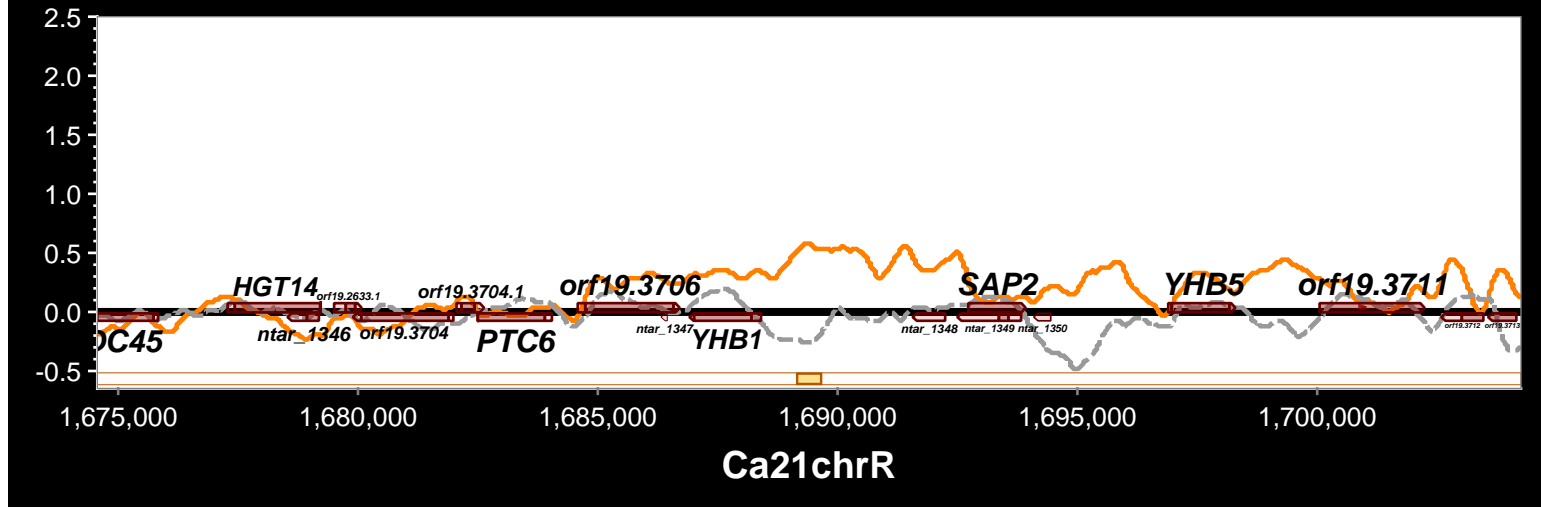

## **Chromatin immunoprecipitation (ChIP) mapping of genomic Tec1 binding sites**

Wild-type strain SN250 plus custom Tec1 antibody vs. *tec1Δ/Δ* strain plus custom Tec1 antibody immunoprecipitation binding data were performed under biofilm conditions. The X-axis represents ORF chromosomal locations. The Y-axis is the Agilent normalized enrichment value (log<sub>2</sub>) post-smoothing for the binding of Tec1. Tec1 immunoprecipitated strain (light blue line) and *tec1Δ/Δ* strain (yellow dashed line) ChIP-chip array binding data was mapped and plotted onto the chromosomes containing the ORFs shown using MochiView v.1.45 software. All significant called peaks for Tec1 are indicated by the light blue track under the peak (see Supplemental Dataset 2 for exact locations and enrichment values). Peak-finding significance thresholds of  $P \leq 0.001$  were used followed by a user-defined cut-off for the minimum value for peak inclusion post-smoothing set to 0.58 (see MochiView manual for details). Genes plotted above the bold line read in the sense direction; genes plotted below the bold line read in the antisense direction.

[2.282] Ca21chrR:1357567-1387250 [+] [BCR1, orf19.721, orf19.725, PPZ1, GST3]

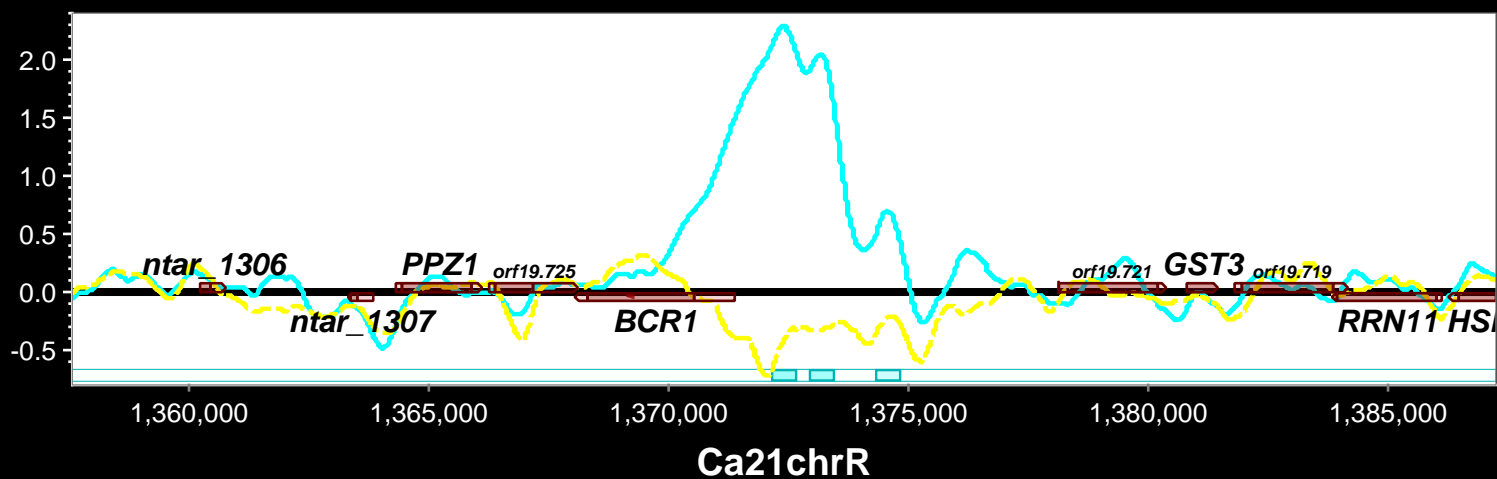

[2.196] Ca21chrR:2154561-2184244 [+] [FAA4, orf19.7590, orf19.7589, orf19.7588, orf19.7593]

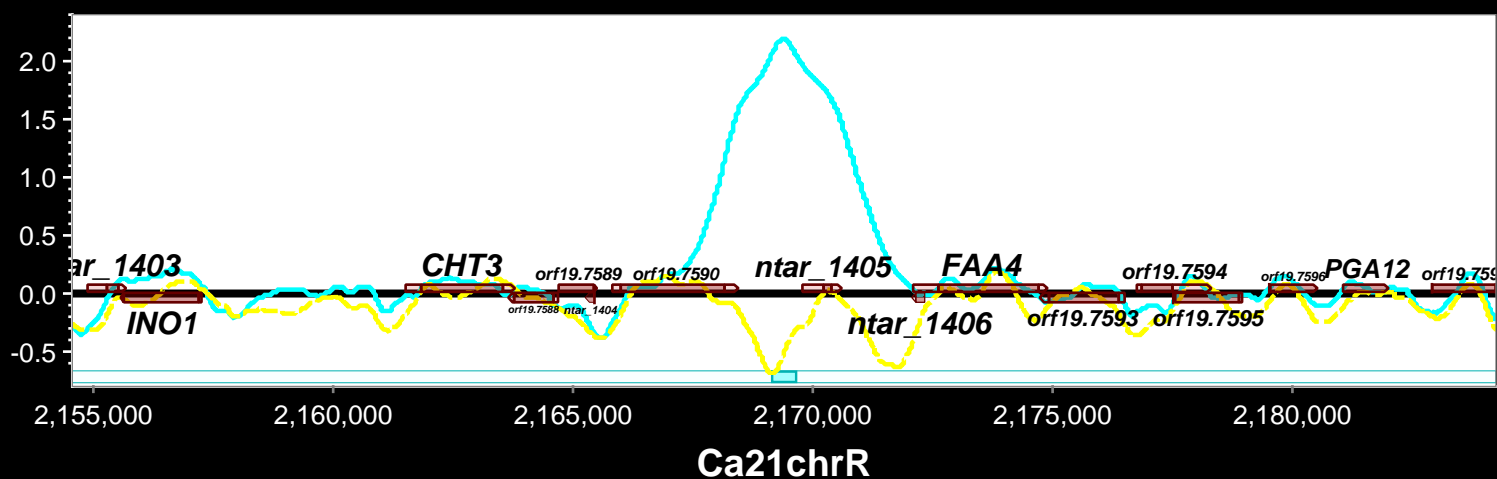

[2.184] Ca21chr7:95946-125629 [+] [orf19.7054, orf19.7056, GAC1, orf19.7057, orf19.7058]

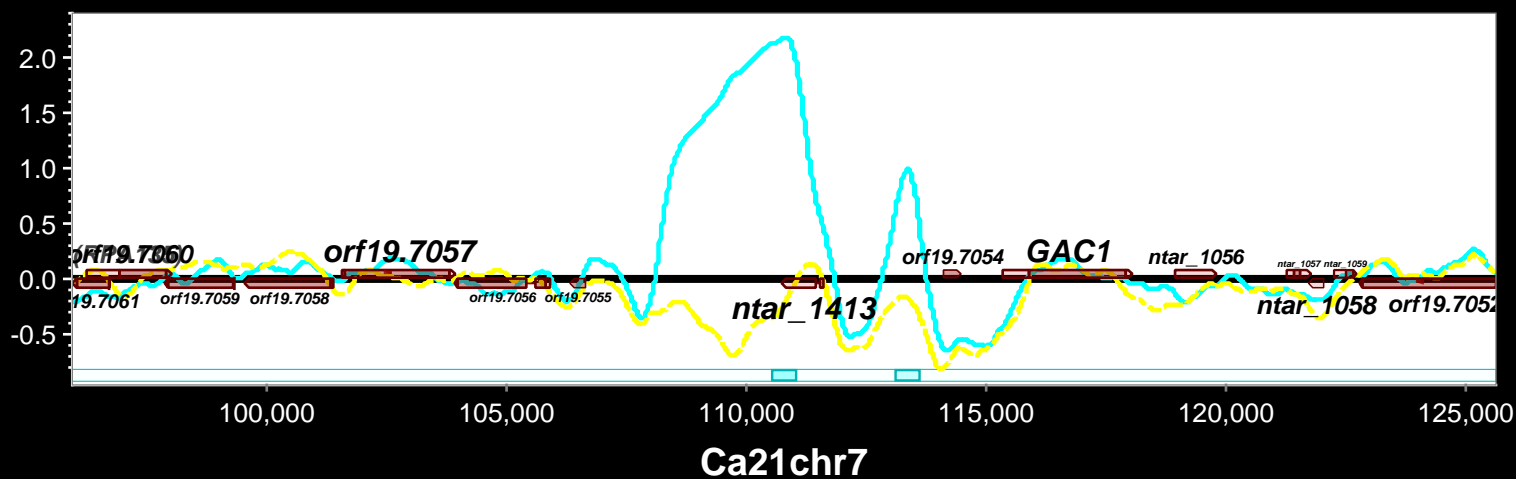

[2.161] Ca21chr1:22163-51846 [+] [PHR2, orf19.6082, orf19.6083, orf19.6084, orf19.6080]

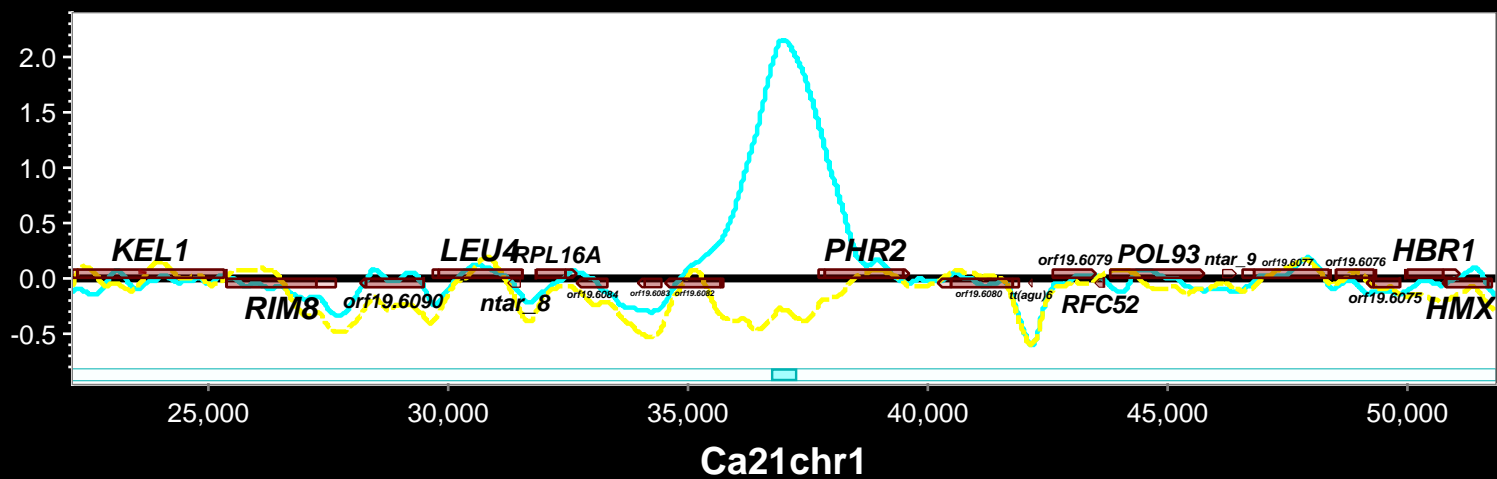

[2.054] Ca21chrR:1358355-1388038 [+] [BCR1, orf19.721, orf19.725, GST3, PPZ1]

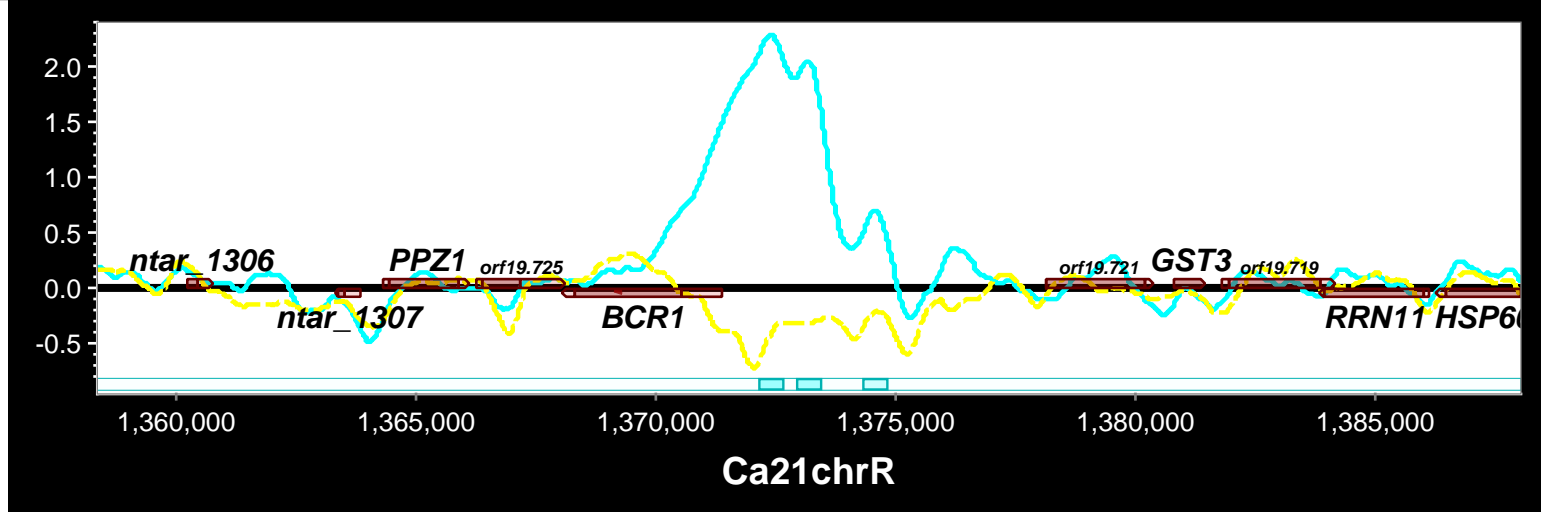

[2.046] Ca21chrR:1704788-1734471 [+] [EFG1, tg(GCC)1, orf19.609, orf19.612, orf19.607]

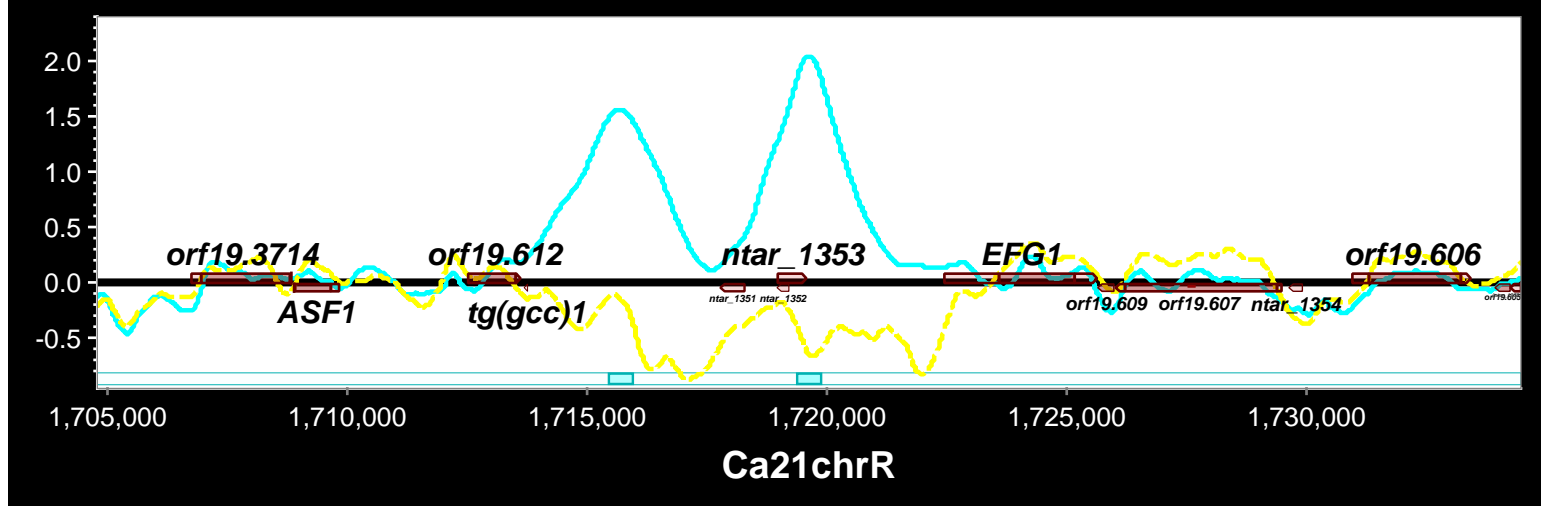

[2.043] Ca21chrR:1515318-1545001 [+] [CRZ2, ALS3, orf19.1815, URA2, orf19.1814]

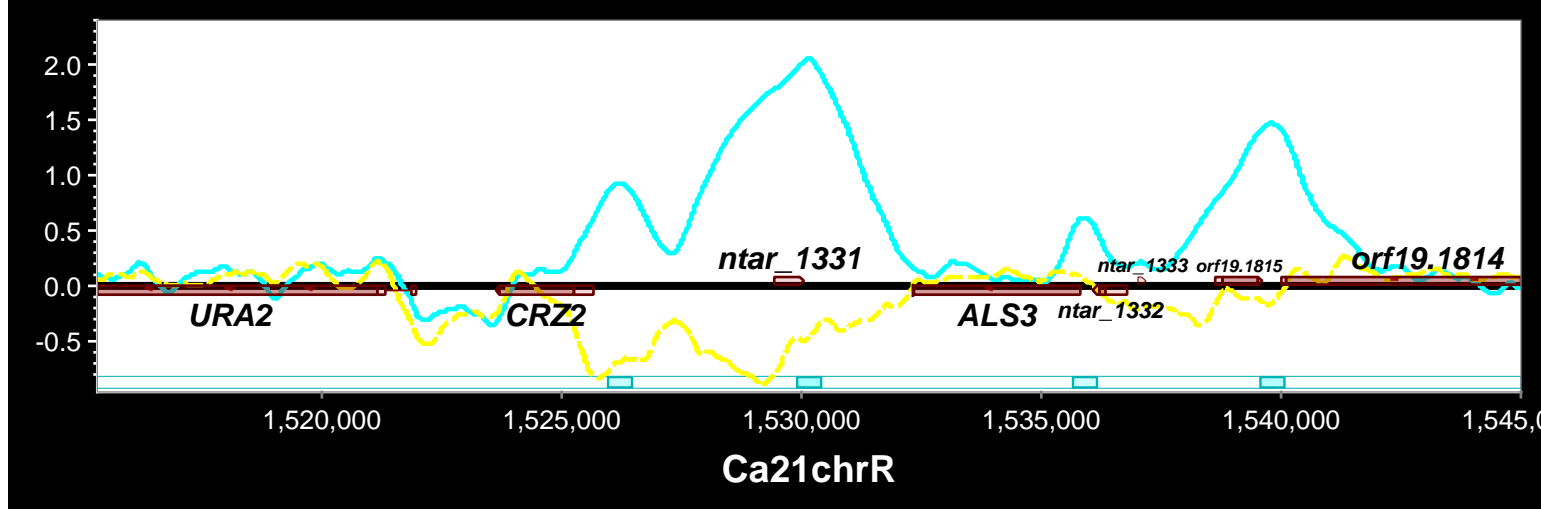

[2.04] Ca21chr1:1066473-1096156 [+] [GAT2, orf19.450, orf19.4057, orf19.4059, ARO4]

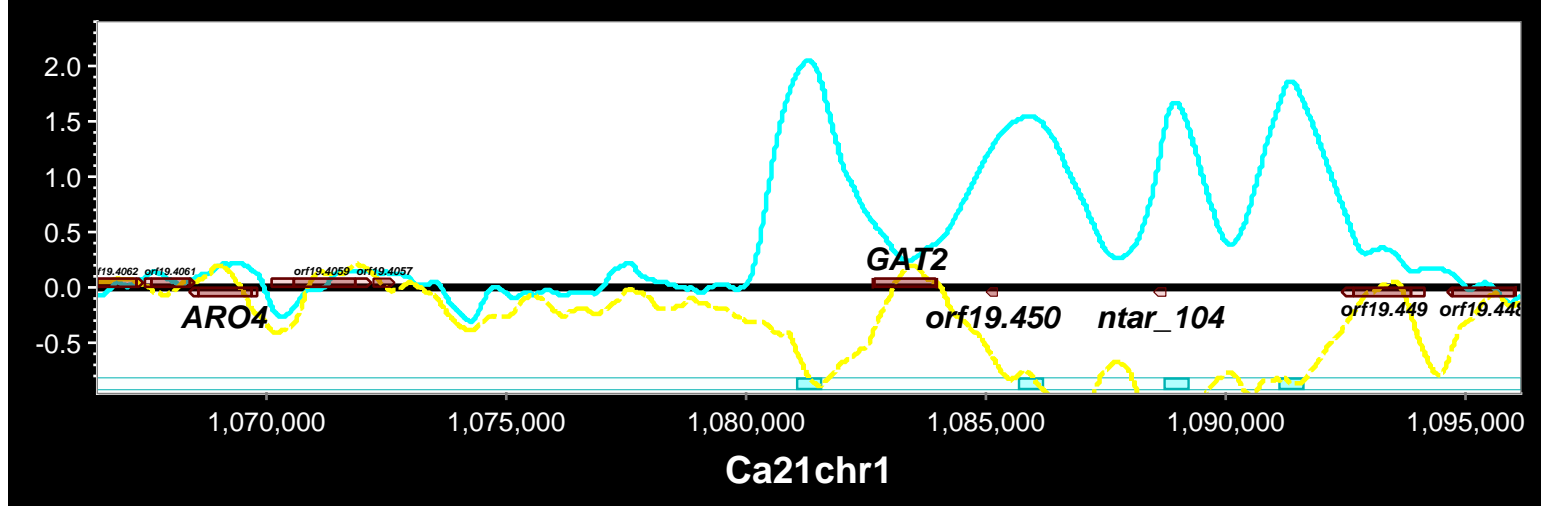

[2.009] Ca21chr2:1366546-1396229 [+] [LSP1, orf19.3148, GRE2, orf19.3147, orf19.3151]

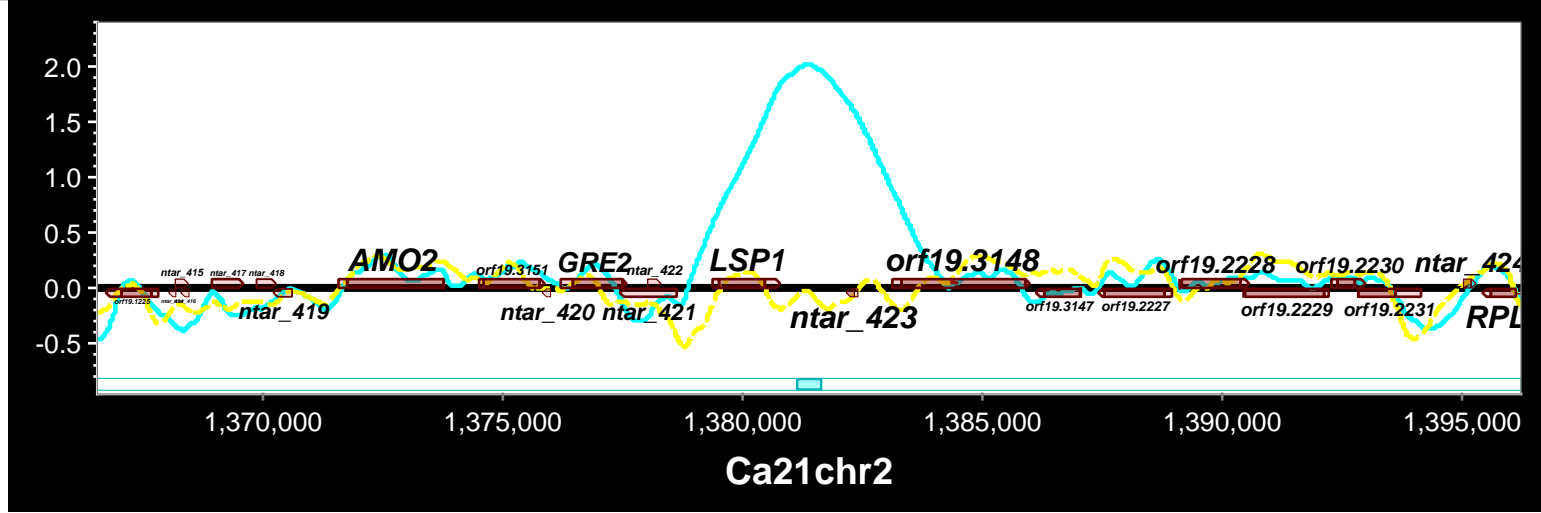

[1.995] Ca21chr5:1102273-1131956 [+] [orf19.4000, orf19.4001, orf19.3999, orf19.3998, DUN1]

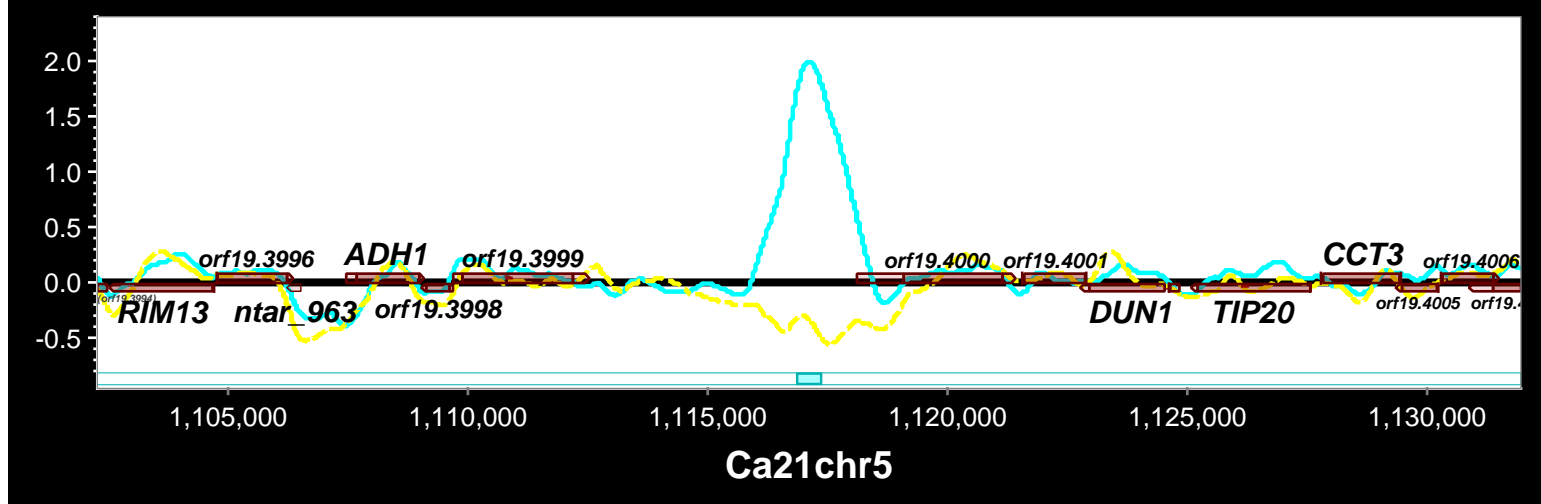

[1.954] Ca21chr5:881854-911537 [+] [orf19.1286, orf19.1285, orf19.1287, FGR42, MEC1]

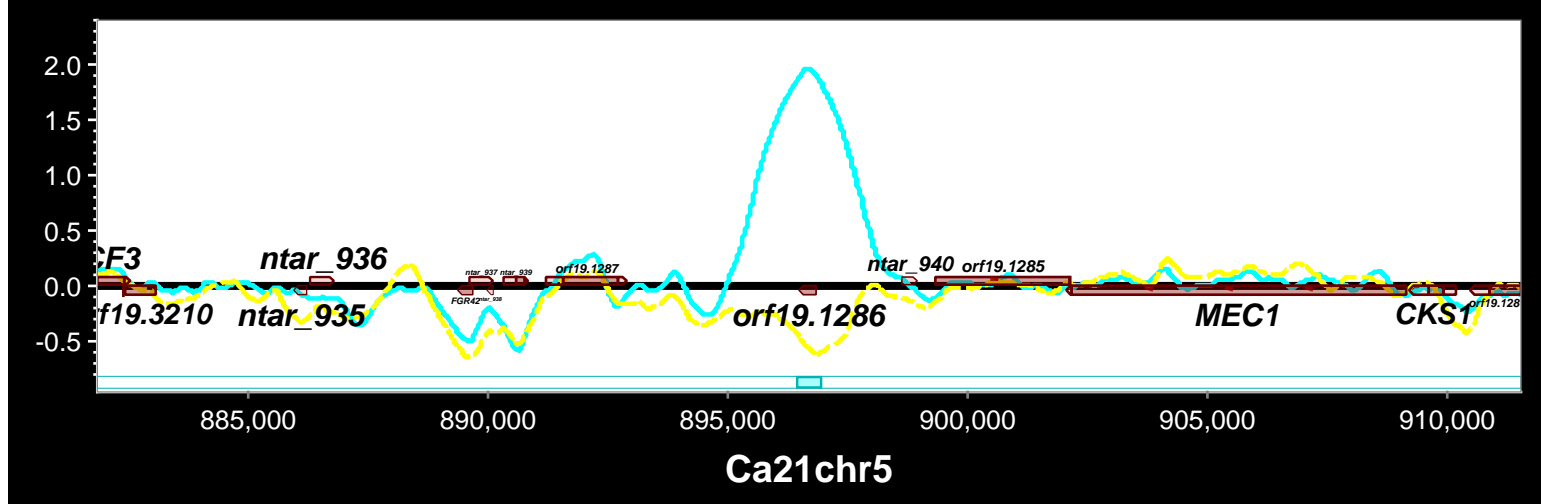

[1.942] Ca21chr6:772782-802465 [+] [ALS1, ALS5, orf19.5735.3, CDC50, ALS9]

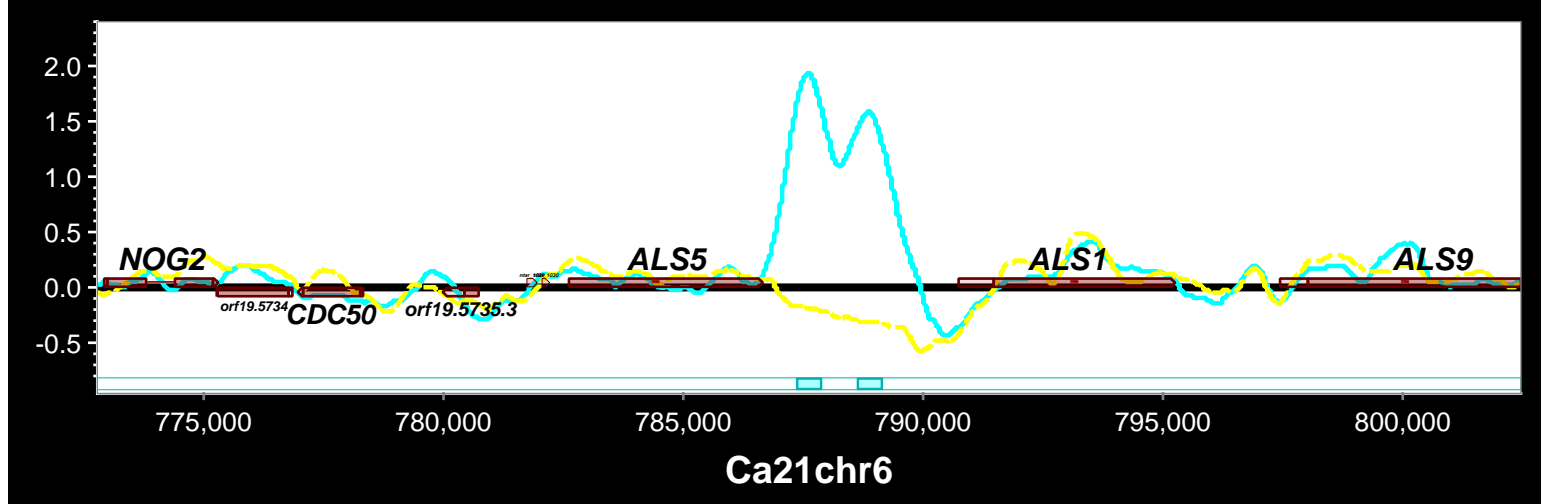

[1.934] Ca21chr3:940651-970334 [+] [TEC1, orf19.5910, CMK1, MAK21, ADE2]

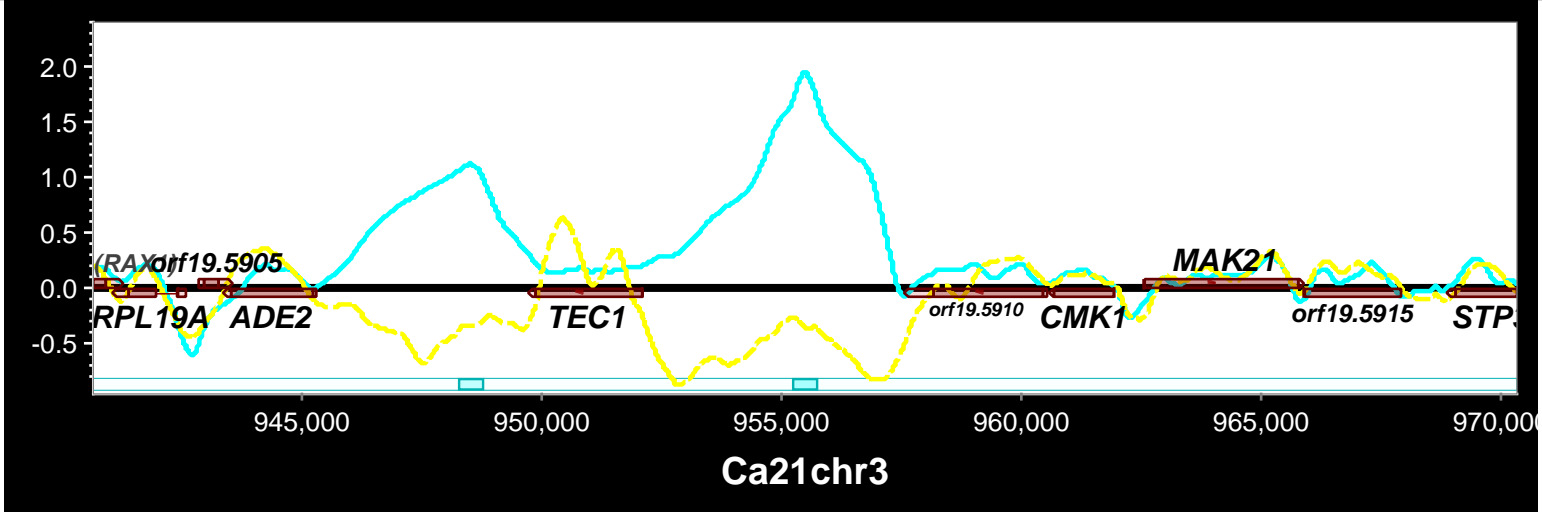

[1.925] Ca21chrR:1300987-1330670 [+] [orf19.3868, orf19.3869, ADE13, orf19.3871, orf19.3872]

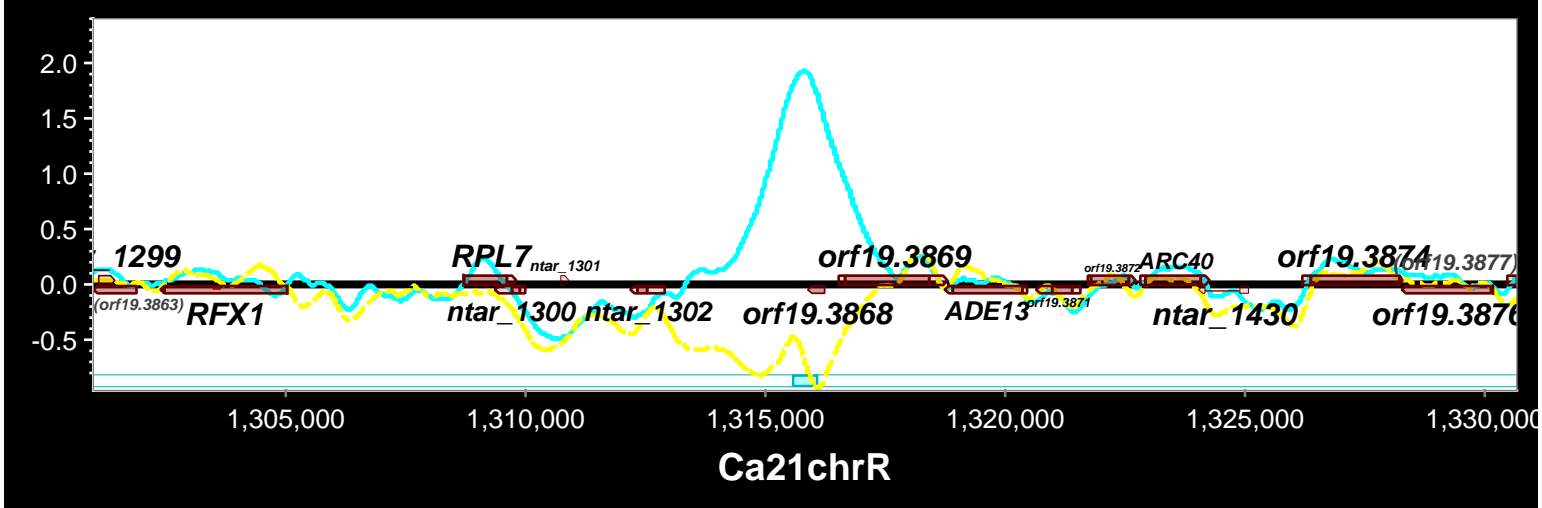

[1.911] Ca21chrR:64506-94189 [+] [orf19.7502, orf19.7501, CDA2, PXA1, orf19.7504]

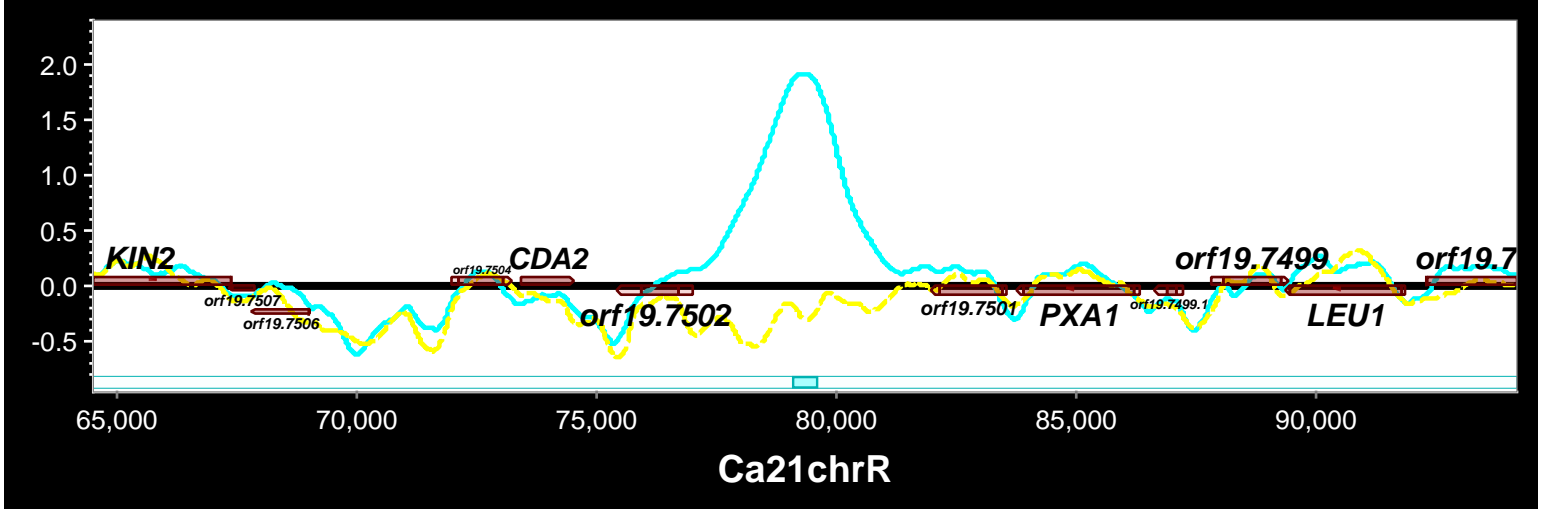

[1.855] Ca21chr1:1076529-1106212 [+] [orf19.449, orf19.448, orf19.450, orf19.446.2, orf19.446.1]

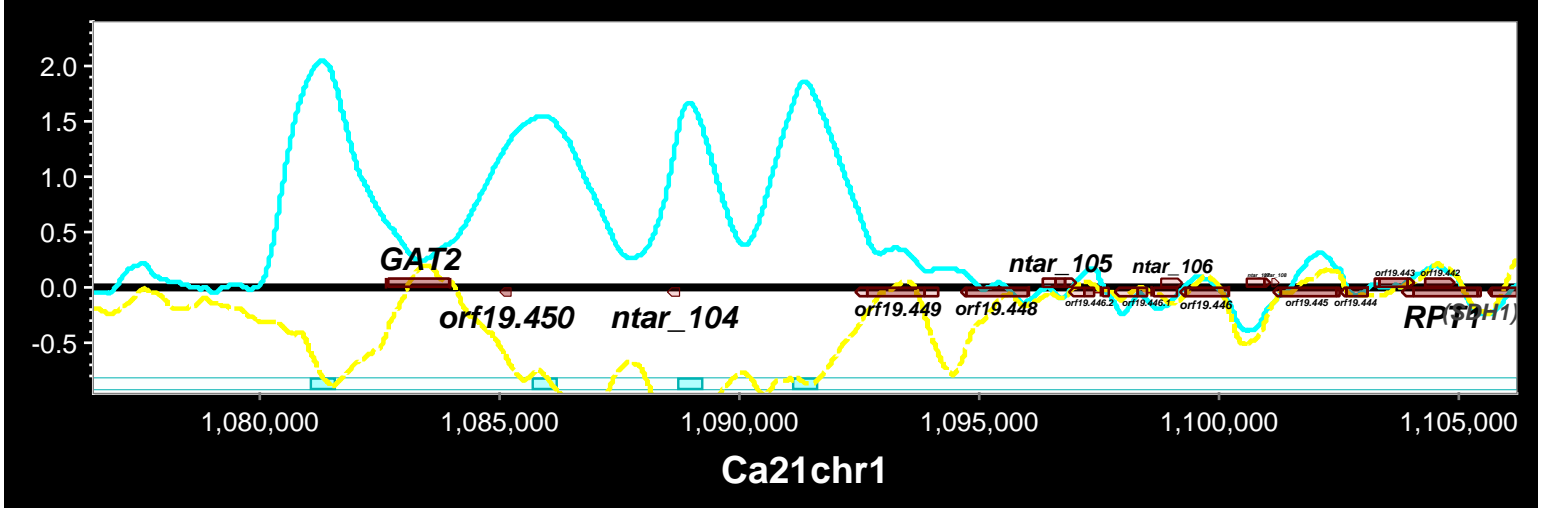

[1.774] Ca21chr7:431082-460765 [+] [CUP9, HSP90, RAD14, orf19.6518, EXO70]

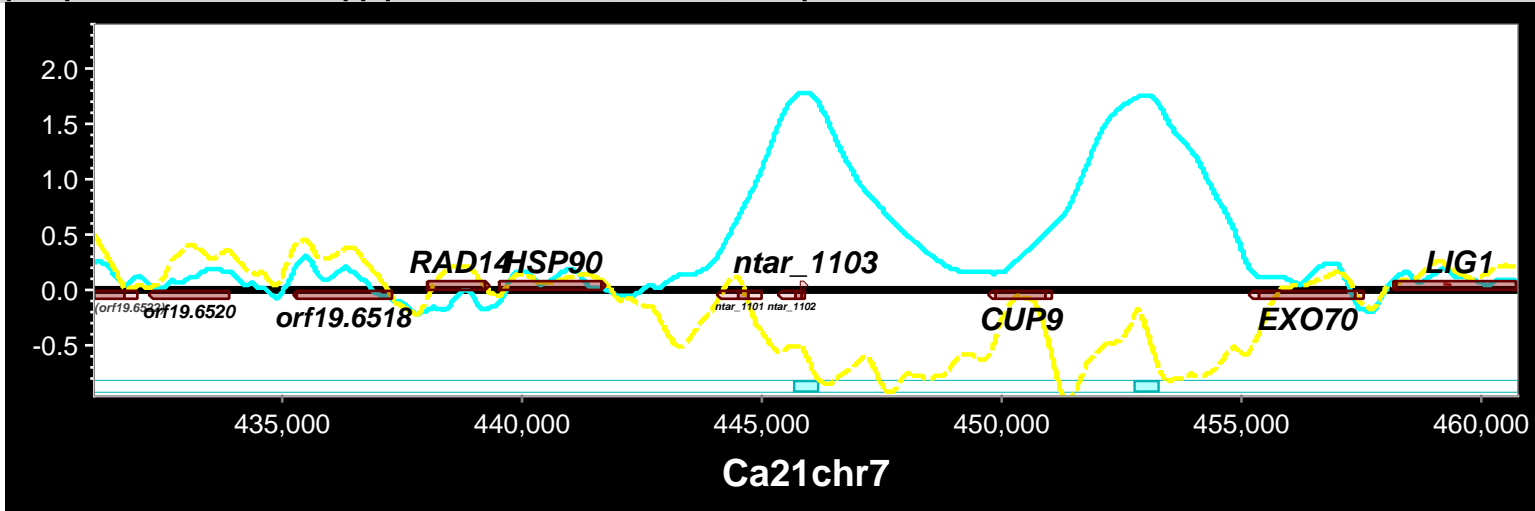

[1.753] Ca21chr7:438180-467863 [+] [CUP9, EXO70, LIG1, GRX1, orf19.6509]

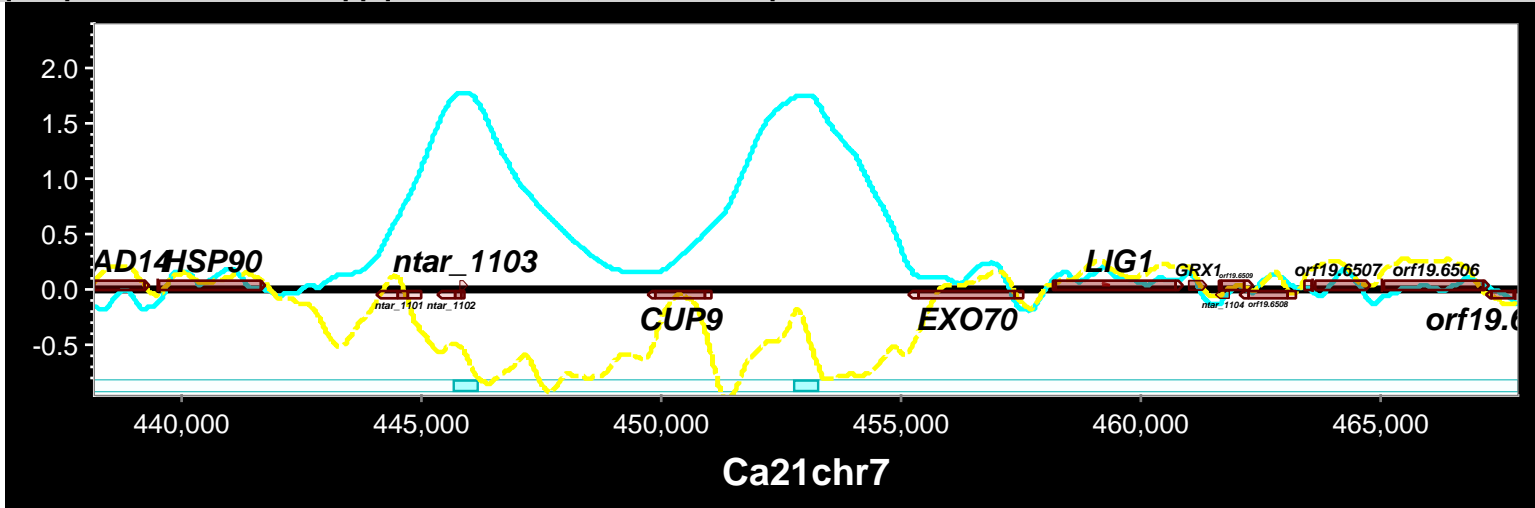

[1.689] Ca21chr6:141430-171113 [+] [SUN41, CAN3, orf19.3643, GPX2, orf19.86]

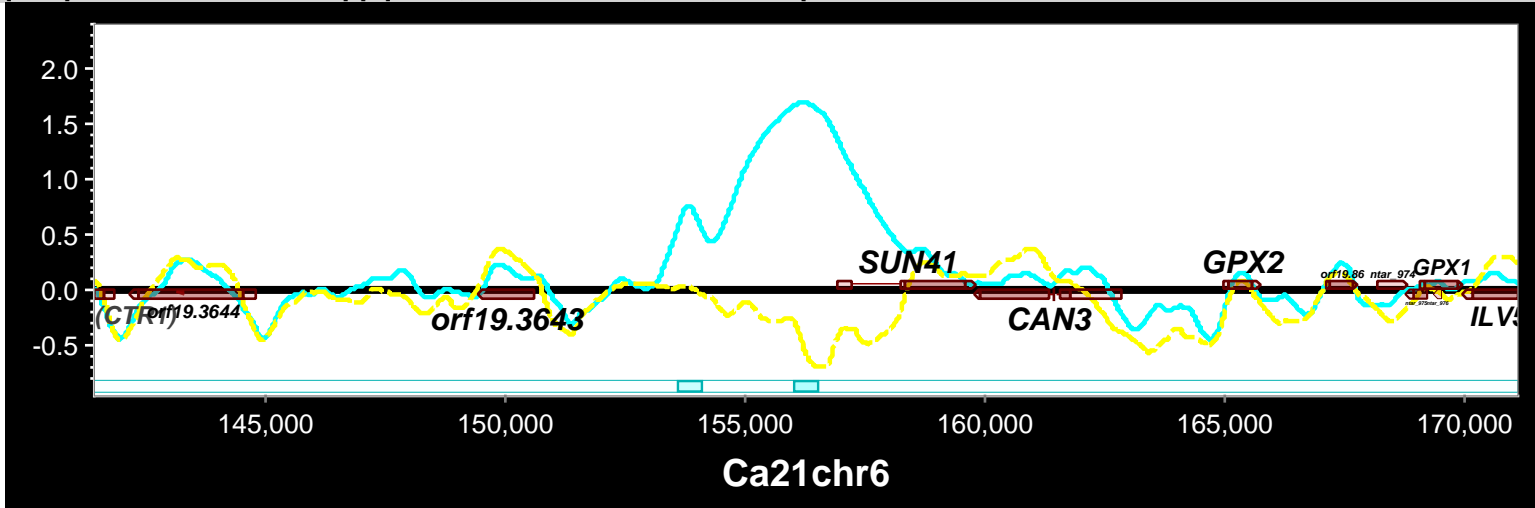

[1.664] Ca21chr1:1074134-1103817 [+] [orf19.450, orf19.449, GAT2, orf19.448, orf19.446.2]

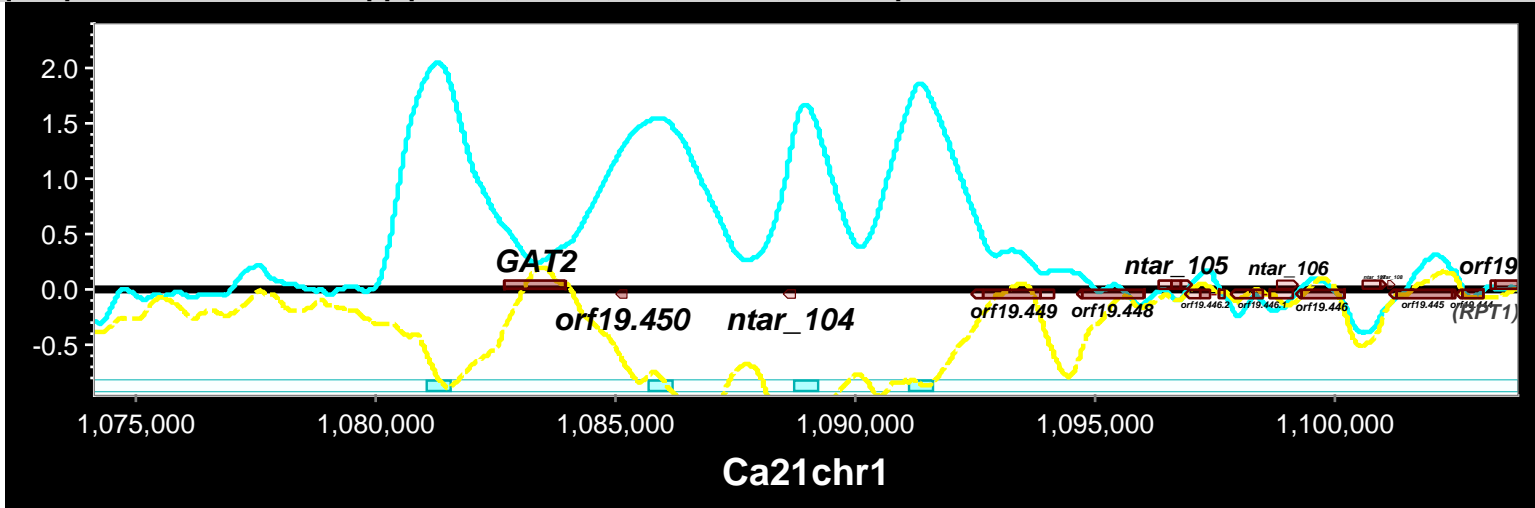

[1.65] Ca21chr2:1130962-1160645 [+] [tS(AGA)4, orf19.6873.1, RPS8A, orf19.6874, orf19.6872]

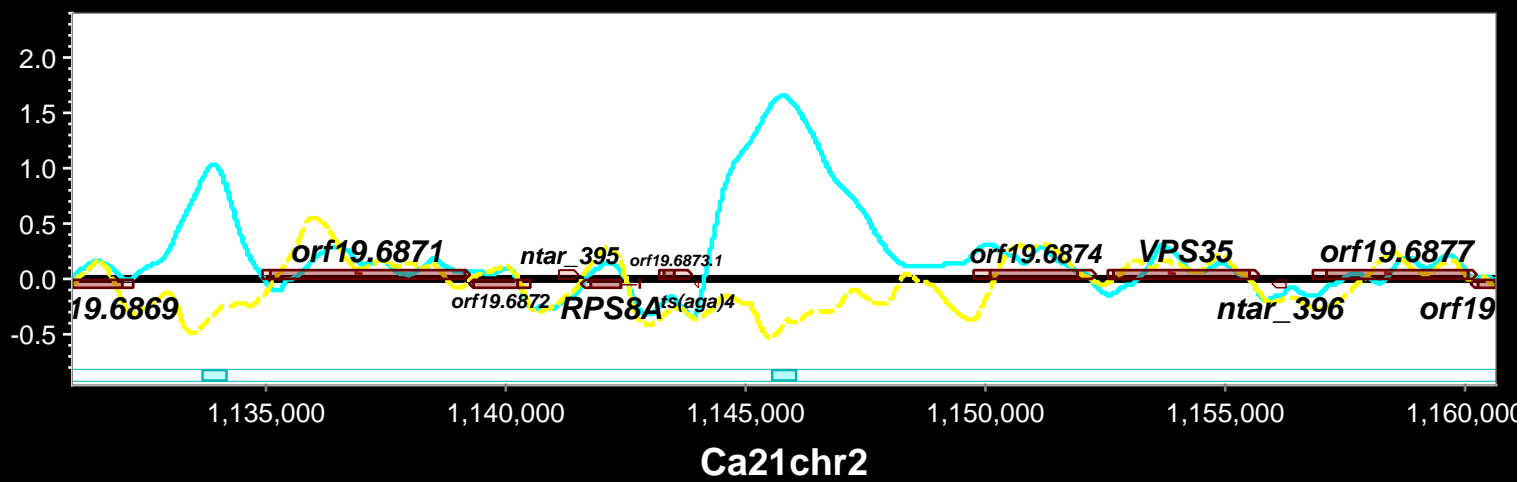

[1.645] Ca21chr4:1427366-1457049 [+] [PRI2, CDC68, CEK1, MET13, CSO99]

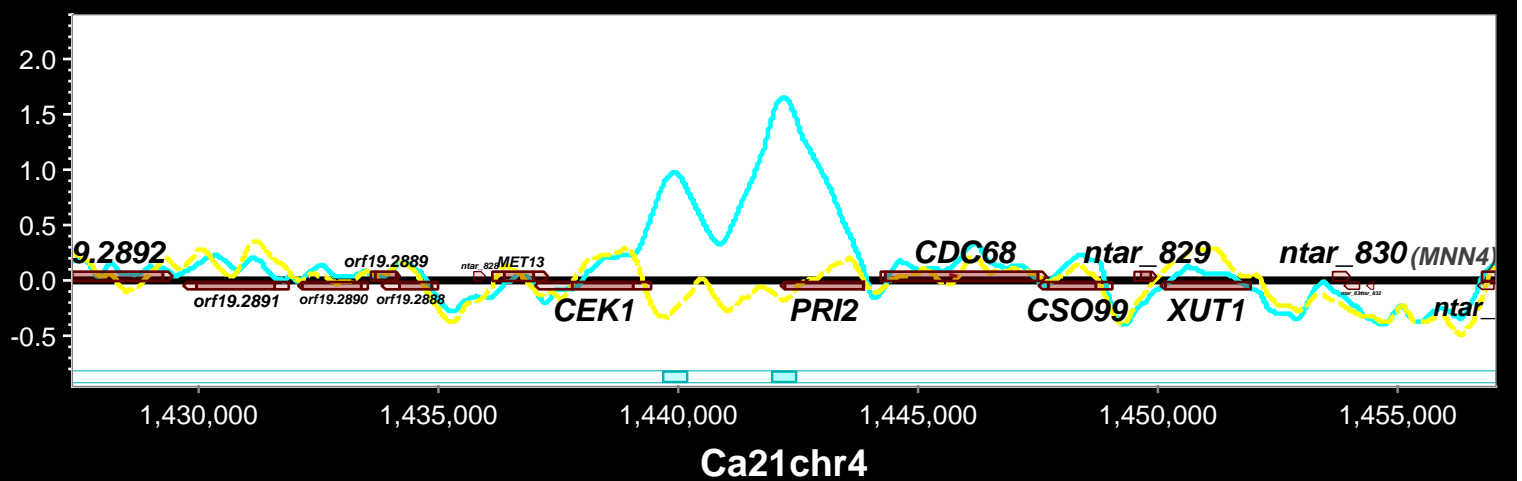

[1.643] Ca21chr2:1730327-1760010 [+] [YWP1, orf19.3617, orf19.3621, ERG9, ANP1]

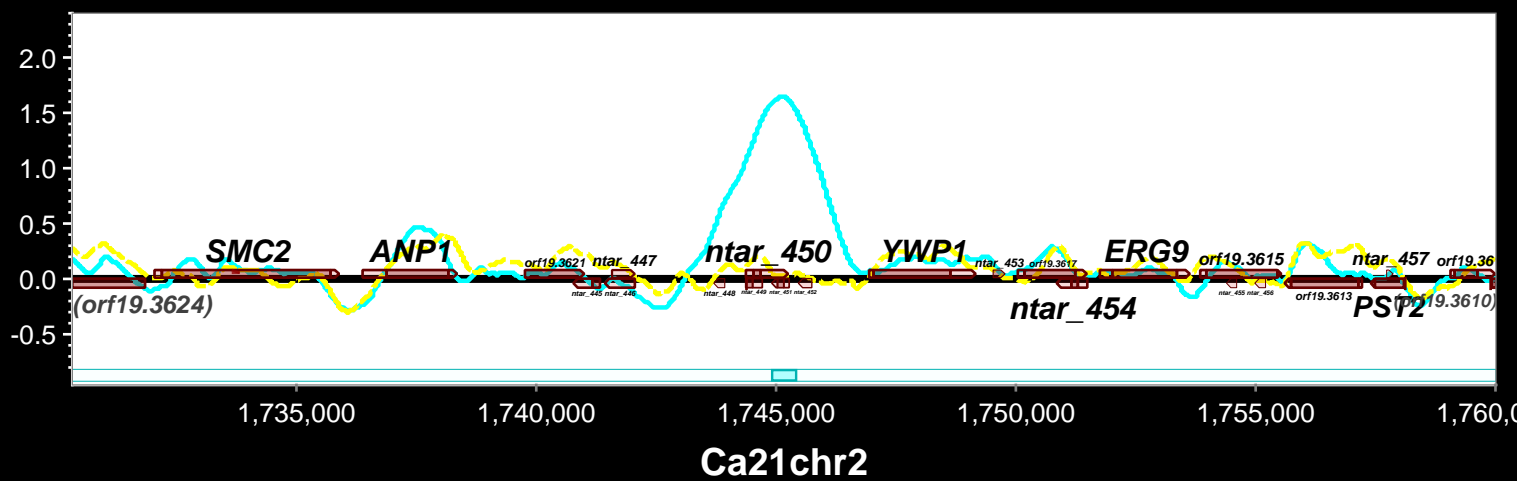

[1.616] Ca21chr4:1508995-1538678 [+] [CZF1, orf19.3128, CCT6, orf19.3125, orf19.3124]

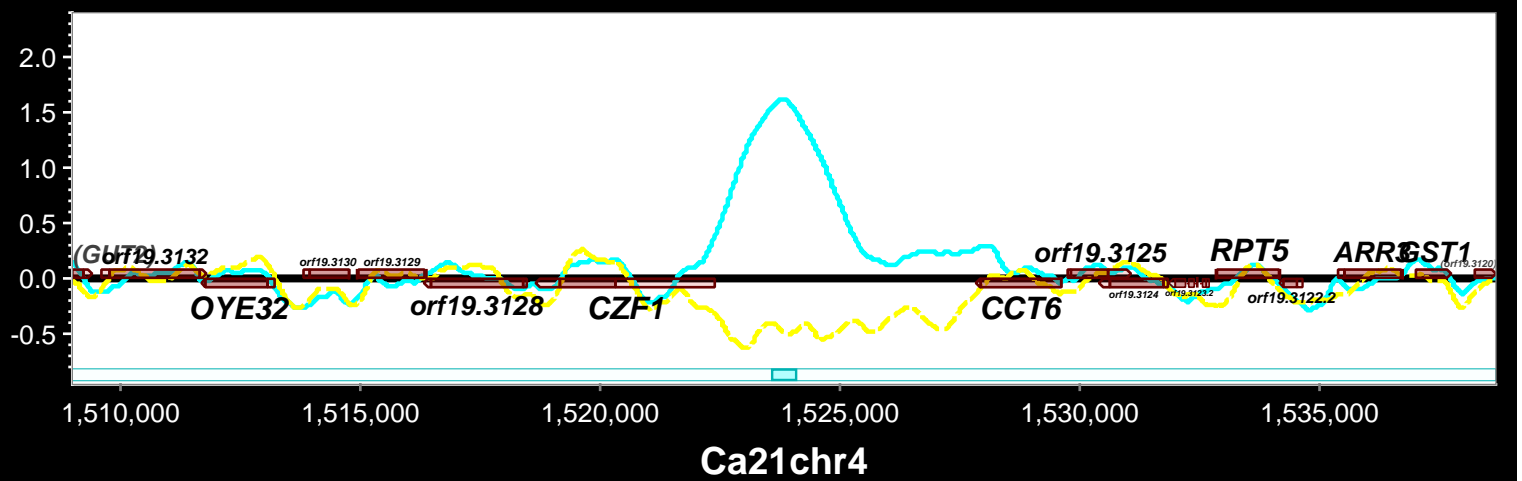



[1.6] Ca21chrR:1618400-1648083 [+] [ECM22, orf19.2624, YPT31, orf19.2625, orf19.2621]

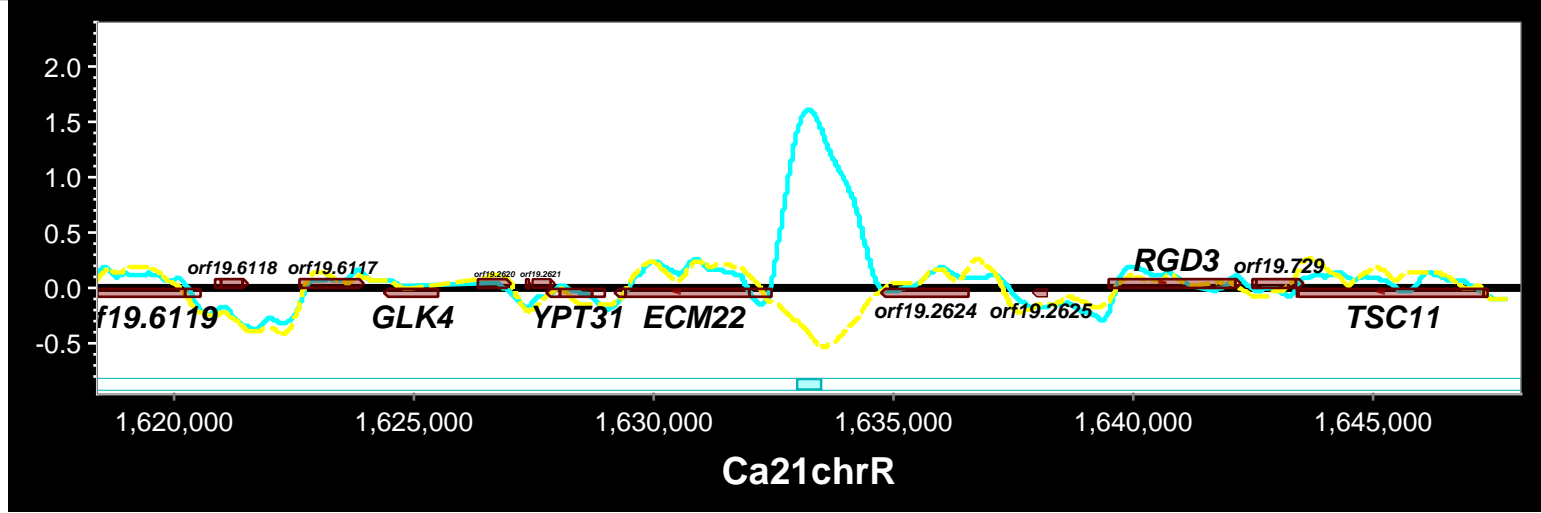

[1.593] Ca21chrR:2097207-2126890 [+] [BET2, DPB2, DEF1, GNP3, orf19.7566]

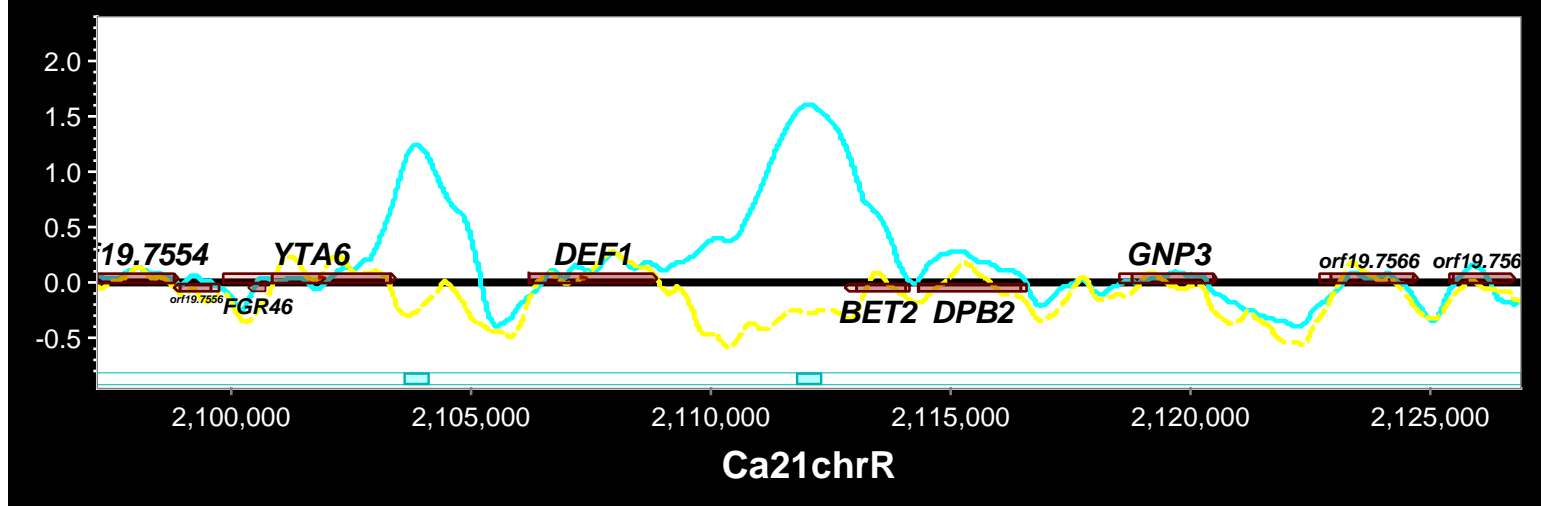

[1.59] Ca21chr4:714166-743849 [+] [ECE1, orf19.3373, orf19.3376, orf19.3371, orf19.3378]

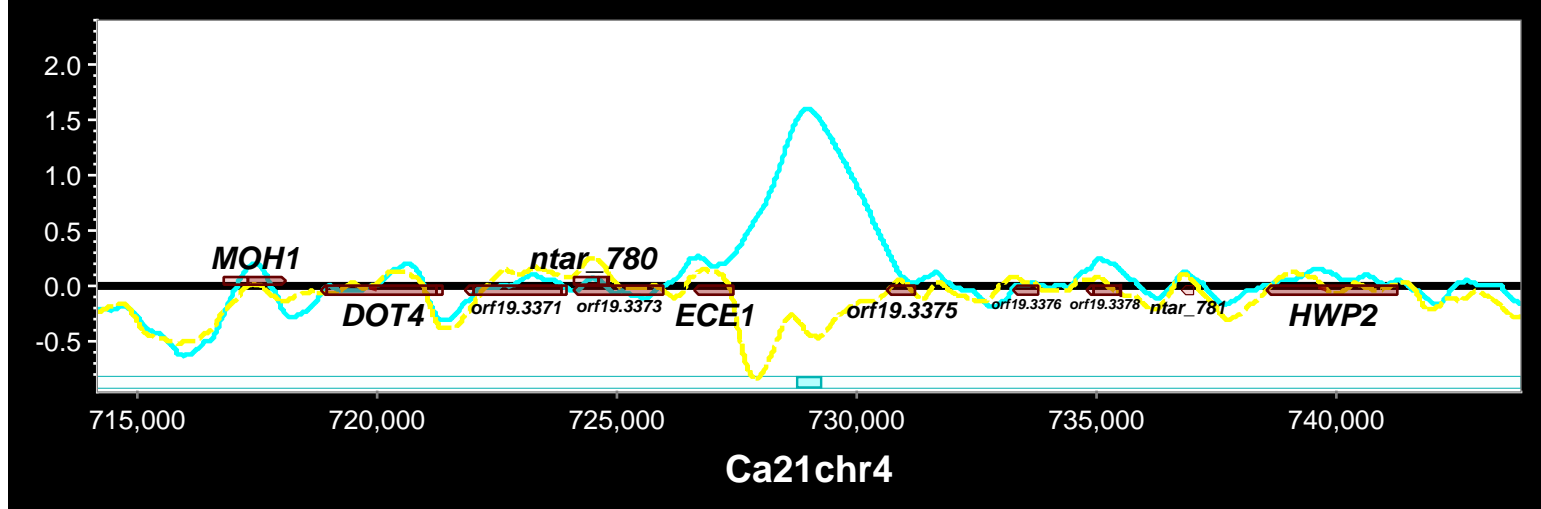

[1.583] Ca21chr3:1575249-1604932 [+] [orf19.6805, orf19.6807, tY(GUA)3, orf19.6804, orf19.6809]

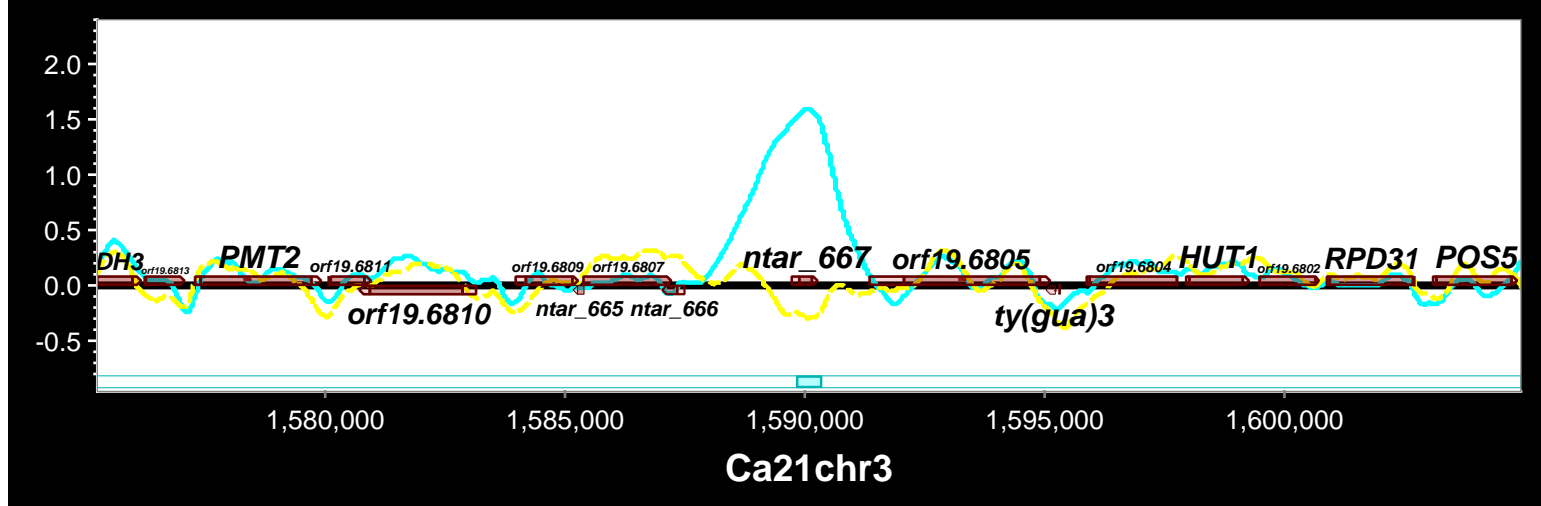

[1.578] Ca21chr6:774048-803731 [+] [ALS1, ALS5, orf19.5735.3, ALS9, CDC50]

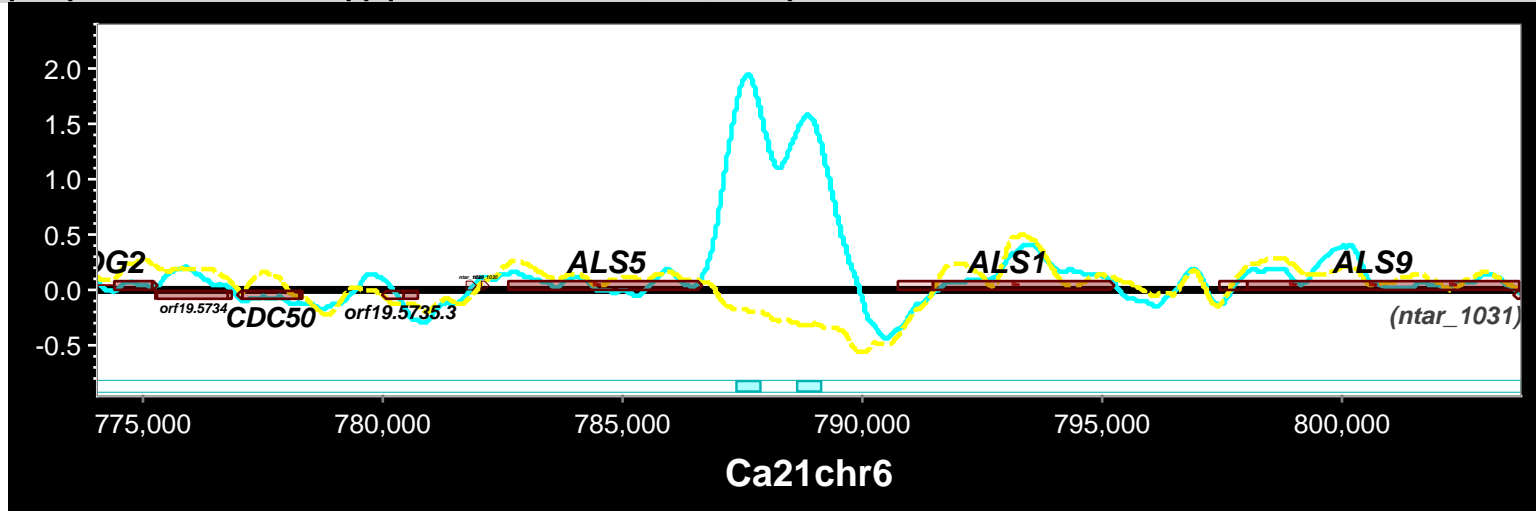

[1.564] Ca21chrR:1700863-1730546 [+] [tG(GCC)1, orf19.612, ASF1, EFG1, orf19.3714]

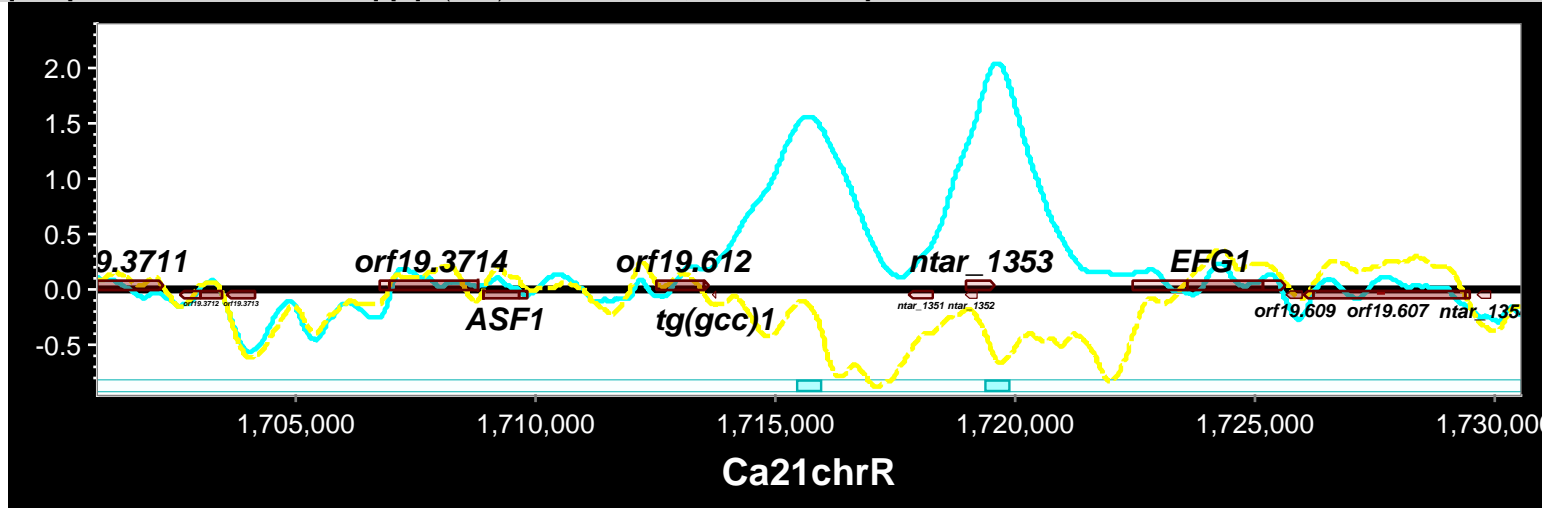

[1.559] Ca21chr4:1410077-1439760 [+] [orf19.2892, orf19.2893, VMA8, SOU1, orf19.2891]

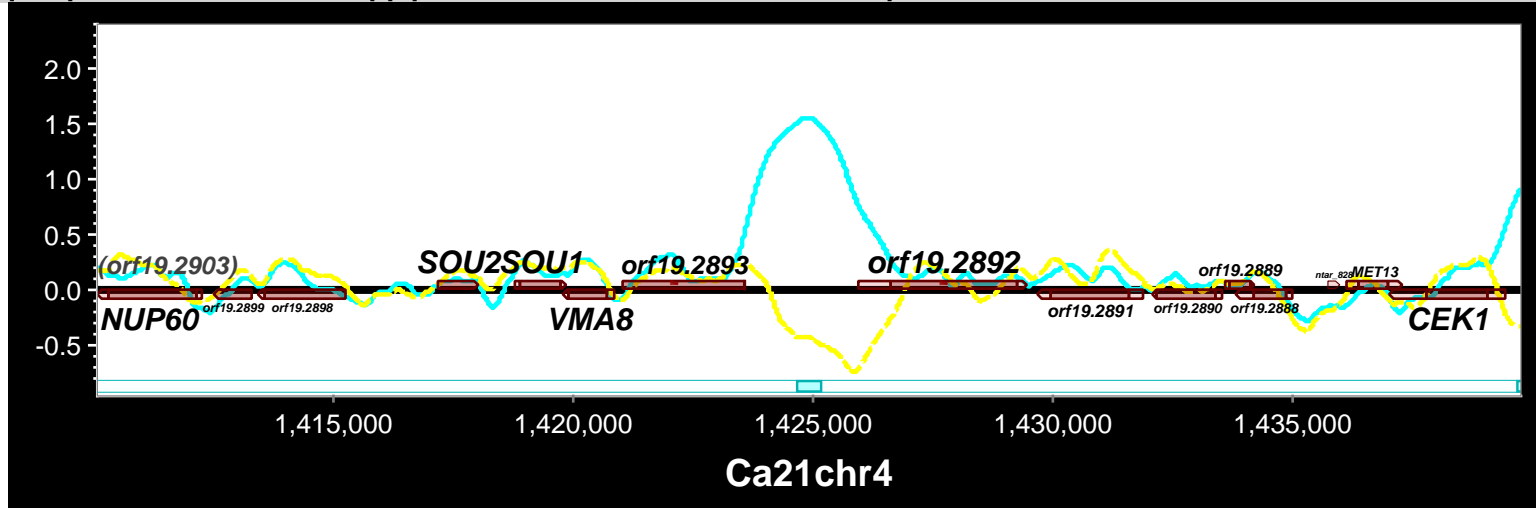

[1.539] Ca21chr1:1071099-1100782 [+] [orf19.450, GAT2, orf19.449, orf19.448, orf19.446.2]

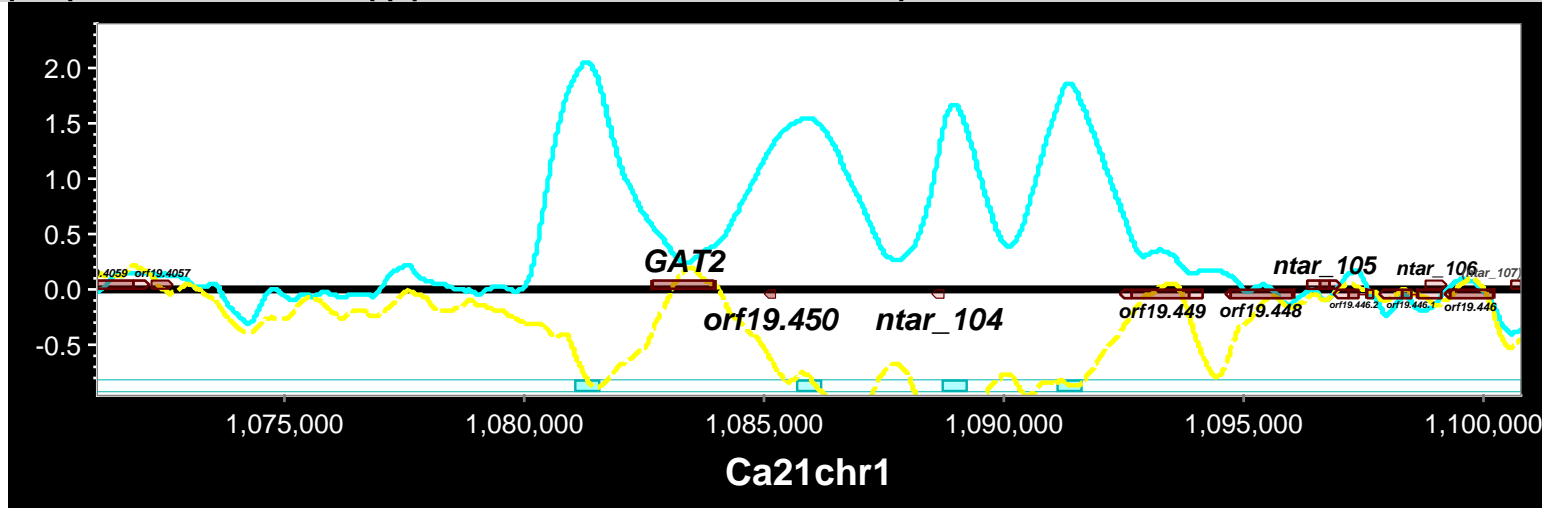

[1.49] Ca21chrR:877070-906753 [+] [TPO4, orf19.474, orf19.475, orf19.470, orf19.477]

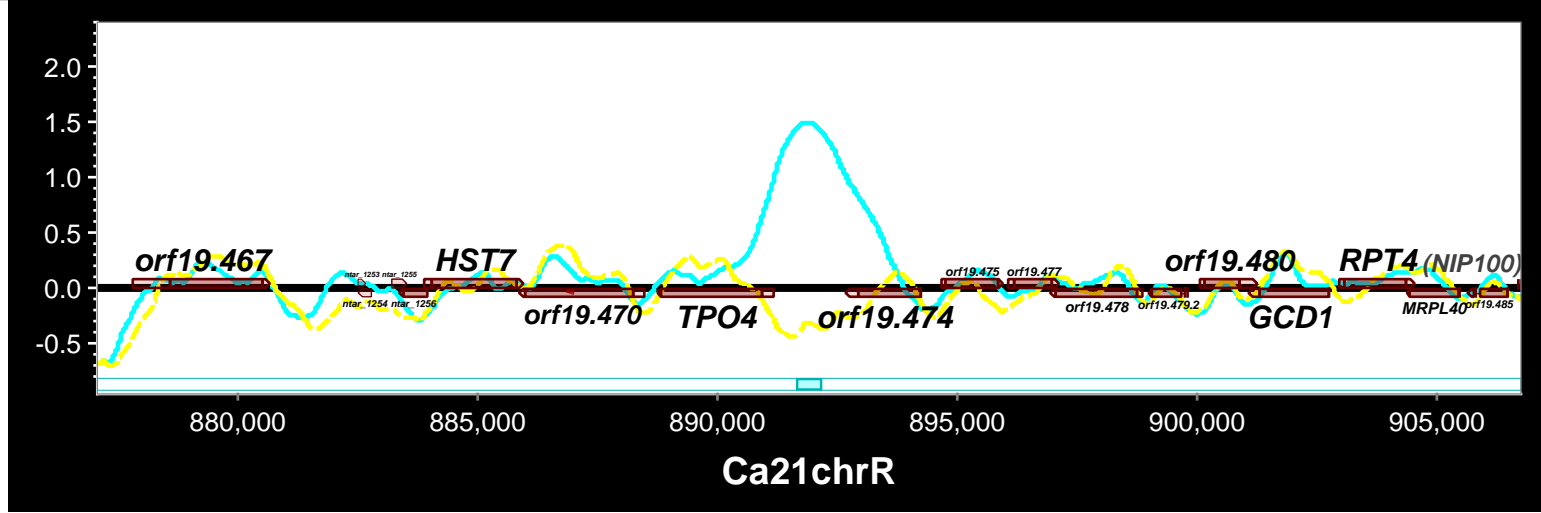

[1.489] Ca21chrR:1255634-1285317 [+] [SOK1, orf19.3848, orf19.3851, SFL1, orf19.3852]

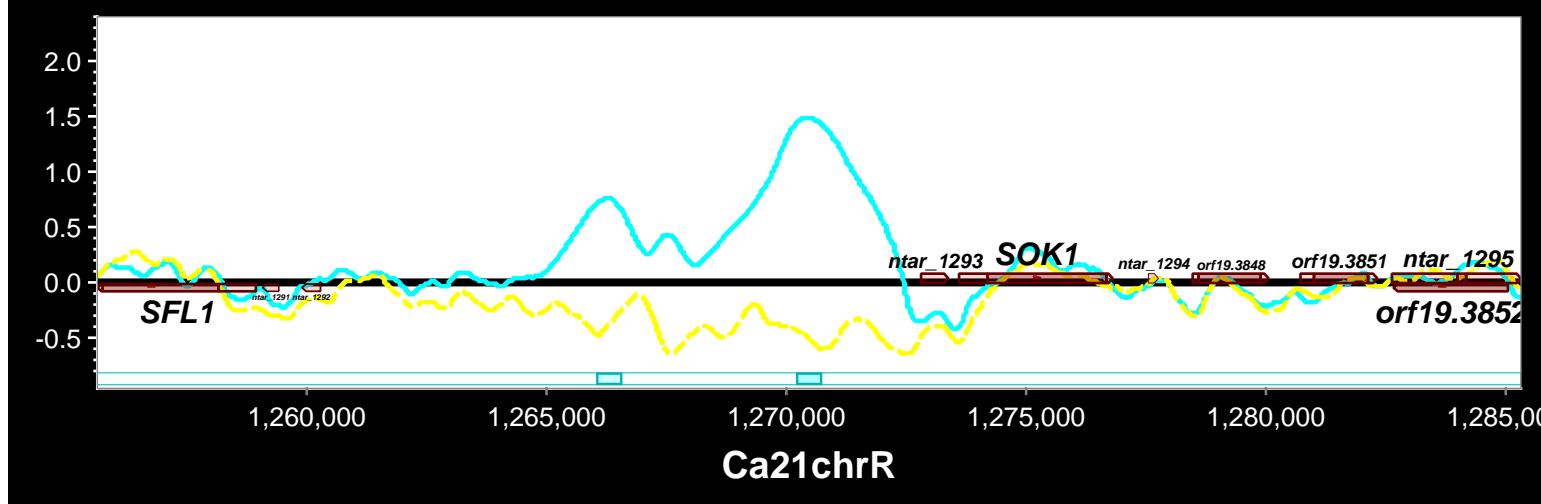

[1.468] Ca21chr5:639712-669395 [+] [orf19.4321, MIG1, DAP2, GRE3, orf19.4323]

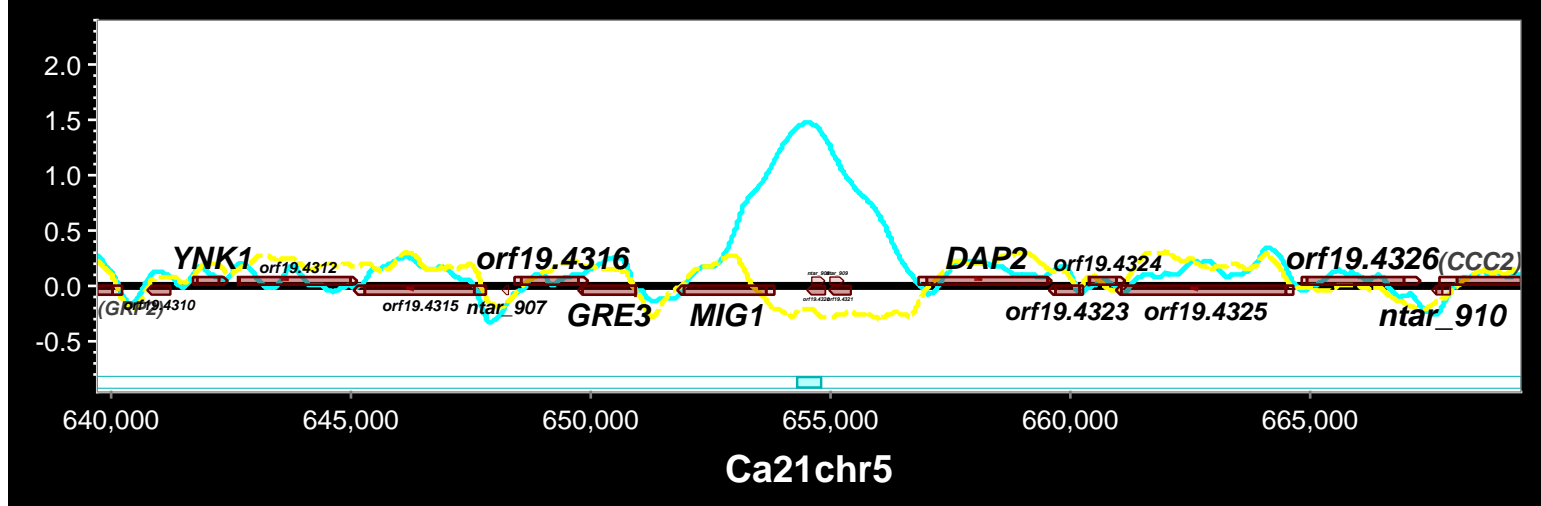

[1.458] Ca21chrR:1524977-1554660 [+] [orf19.1814, orf19.1815, ALS3, FLC2, orf19.8]

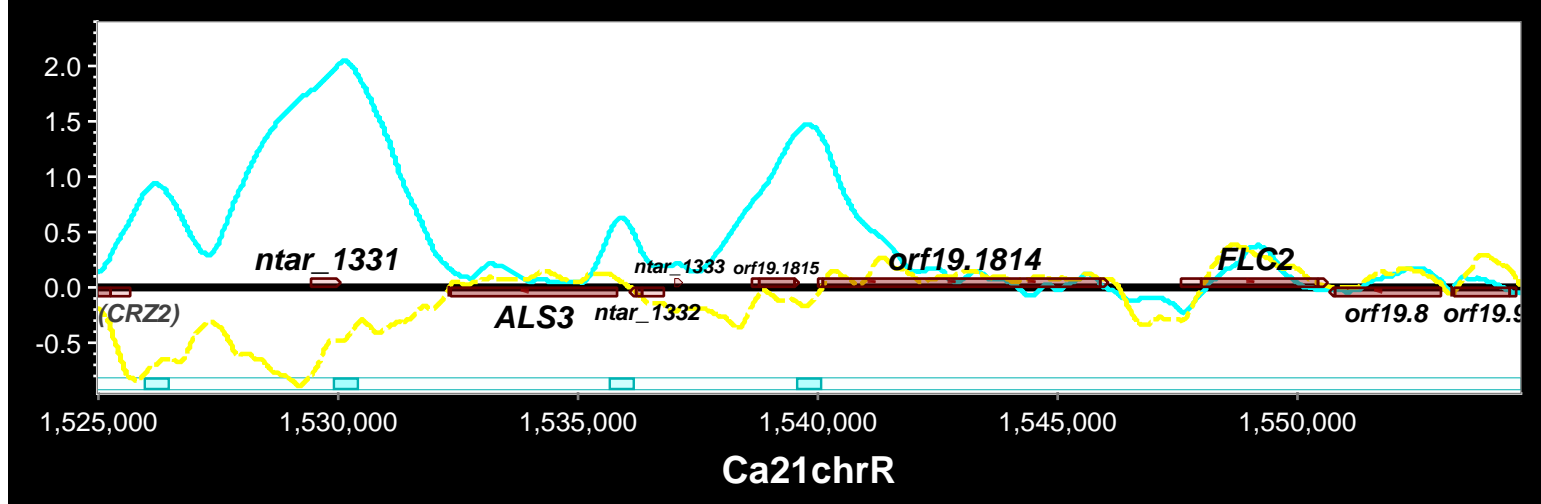

[1.455] Ca21chr7:908777-938460 [+] [orf19.7149, NRG1, TPO2, orf19.7144, orf19.7151]

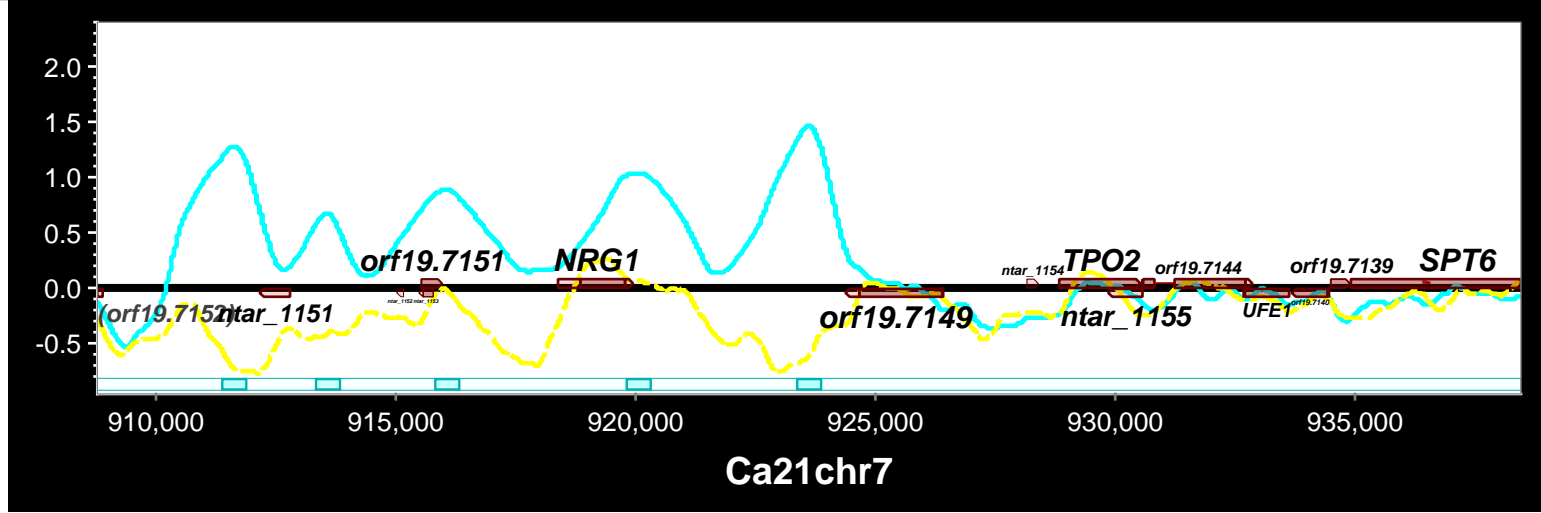

[1.454] Ca21chr1:1031747-1061430 [+] [orf19.53, RHD1, orf19.52, orf19.55, ARG2]

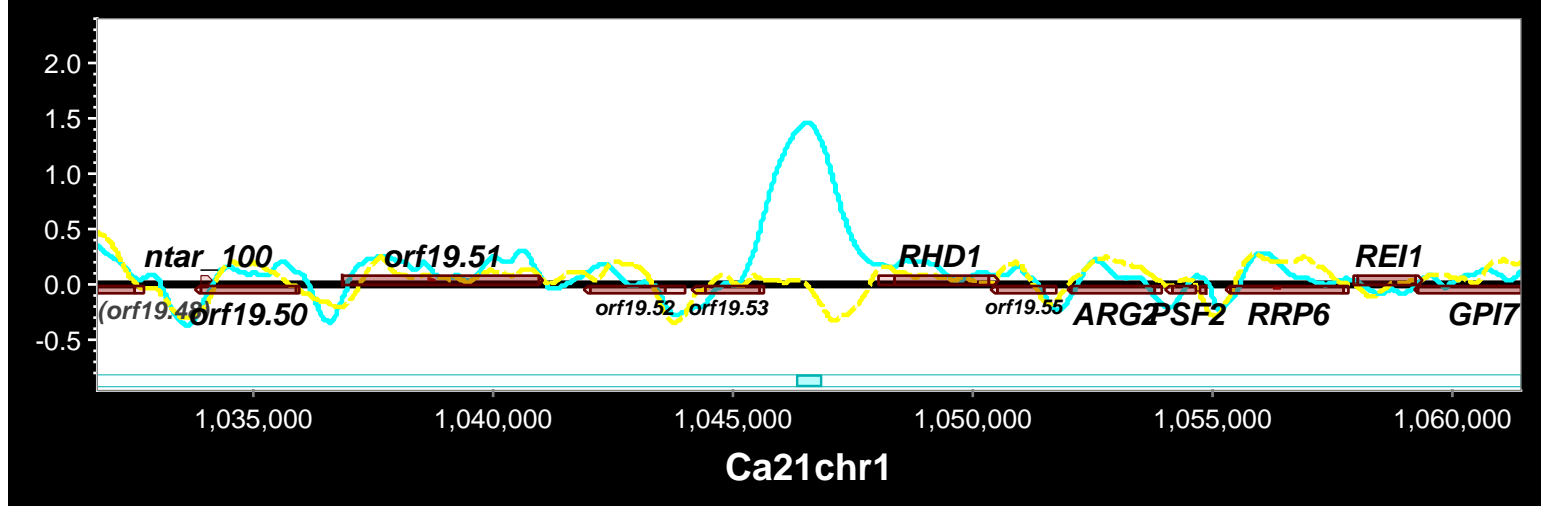

[1.432] Ca21chr3:1590936-1620619 [+] [SSN6, POS5, RPD31, orf19.6802, HUT1]

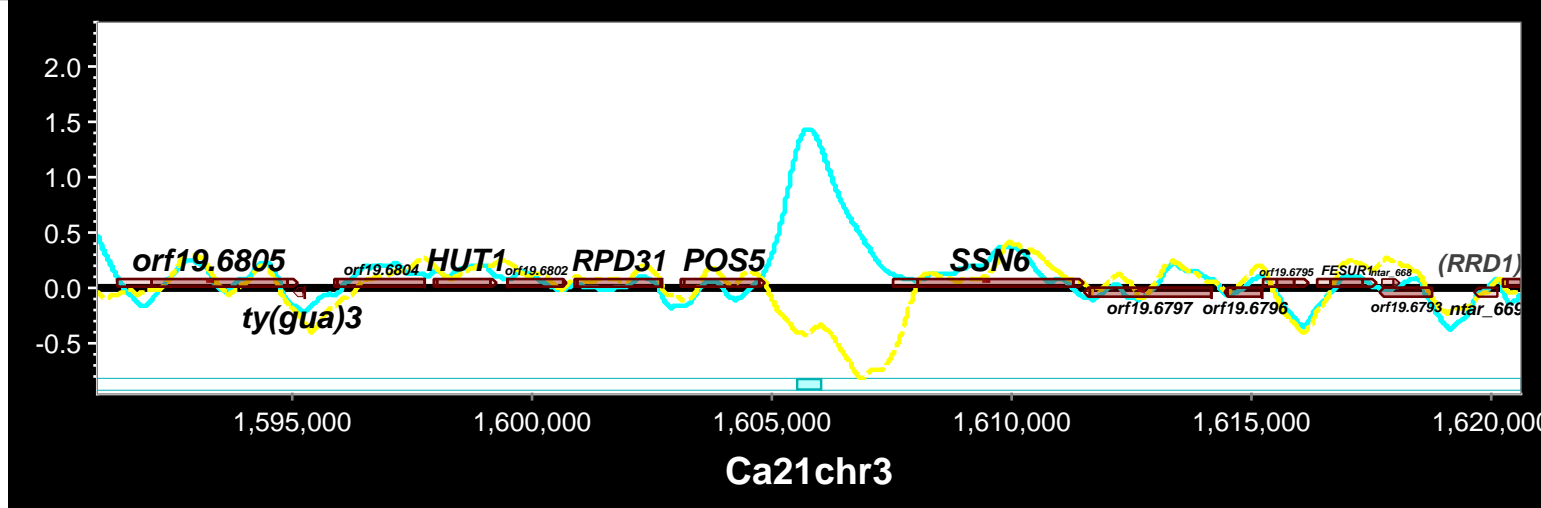

[1.366] Ca21chr1:651298-680981 [+] [ECM33, orf19.3010, orf19.3009, ARO80, COQ4]

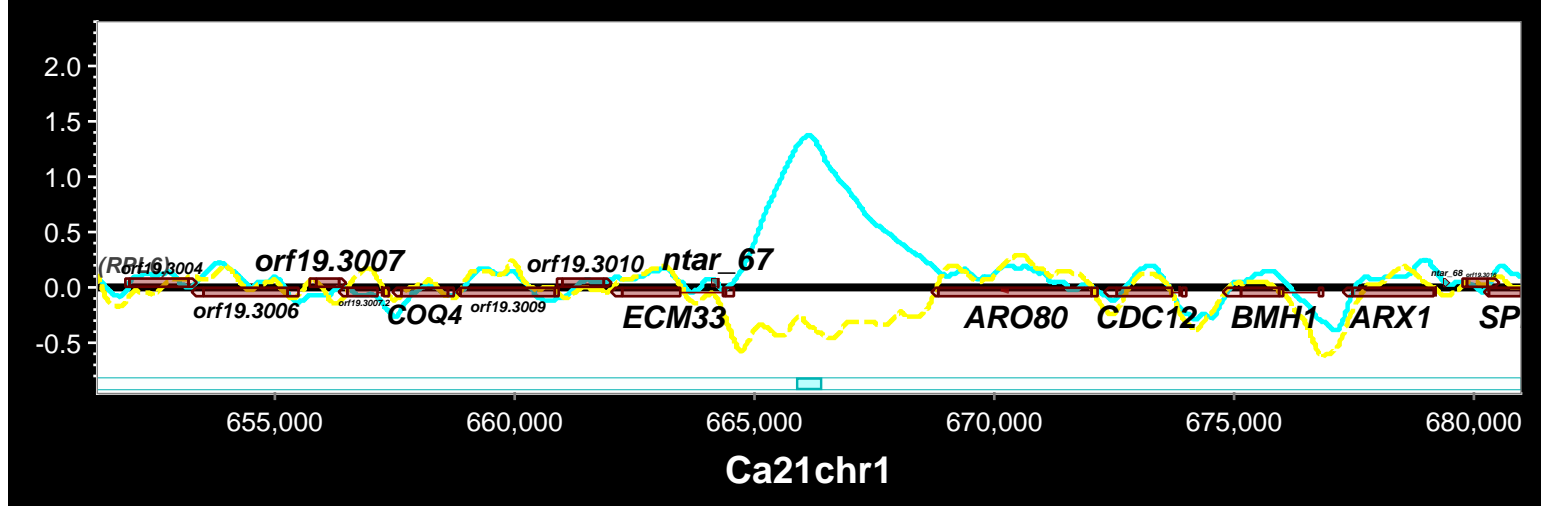

[1.36] Ca21chr1:1484740-1514423 [+] [RBT4, orf19.6203, orf19.6200, orf19.6205, orf19.6199]

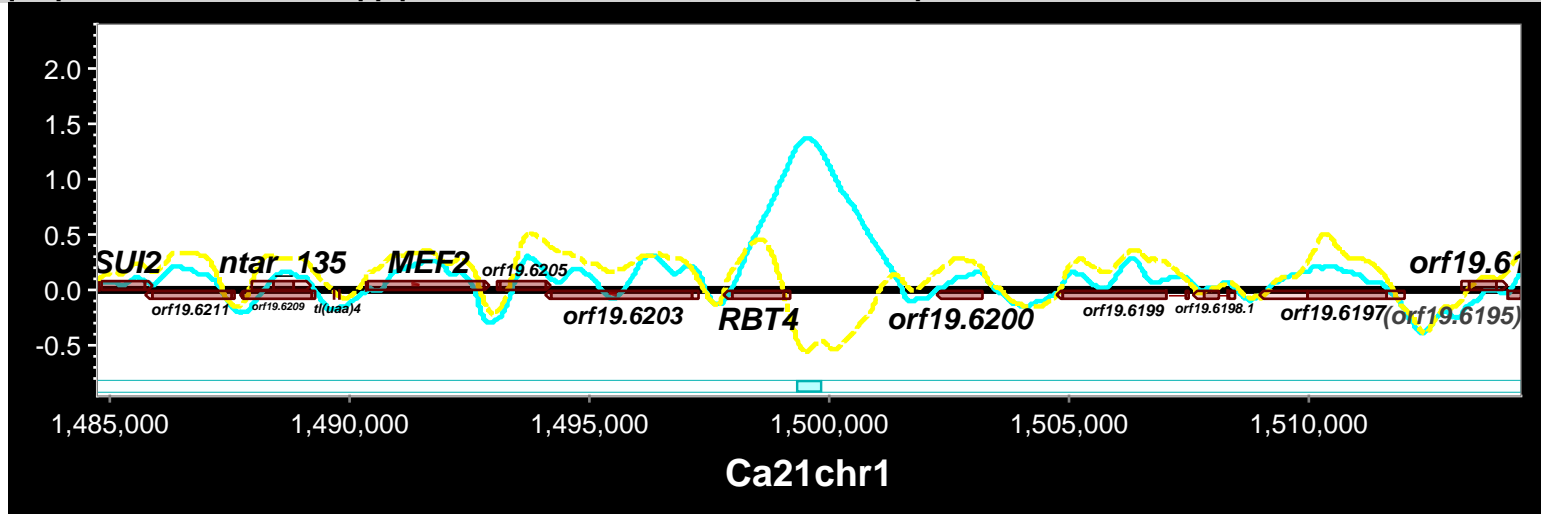

[1.323] Ca21chr6:22871-52554 [+] [orf19.1189, CPH2, orf19.1186, orf19.1185, orf19.1190]

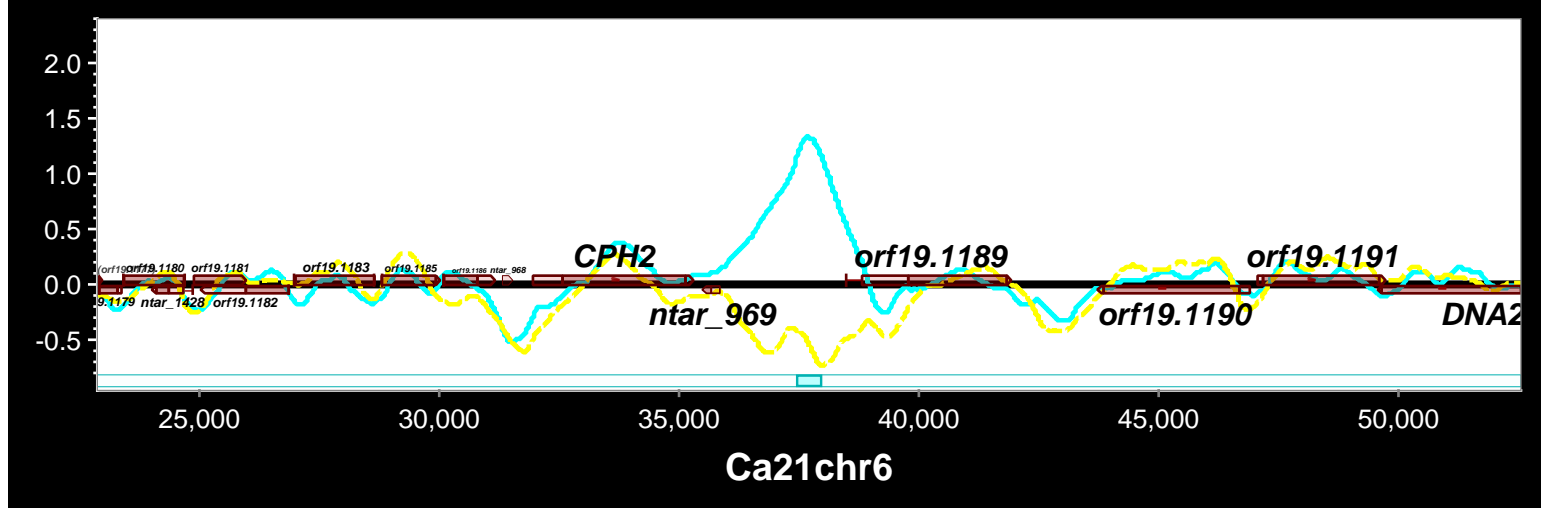

[1.279] Ca21chrR:1823533-1853216 [+] [PGA13, orf19.6419.1, orf19.6418, tL(CAA)4, TSR1]

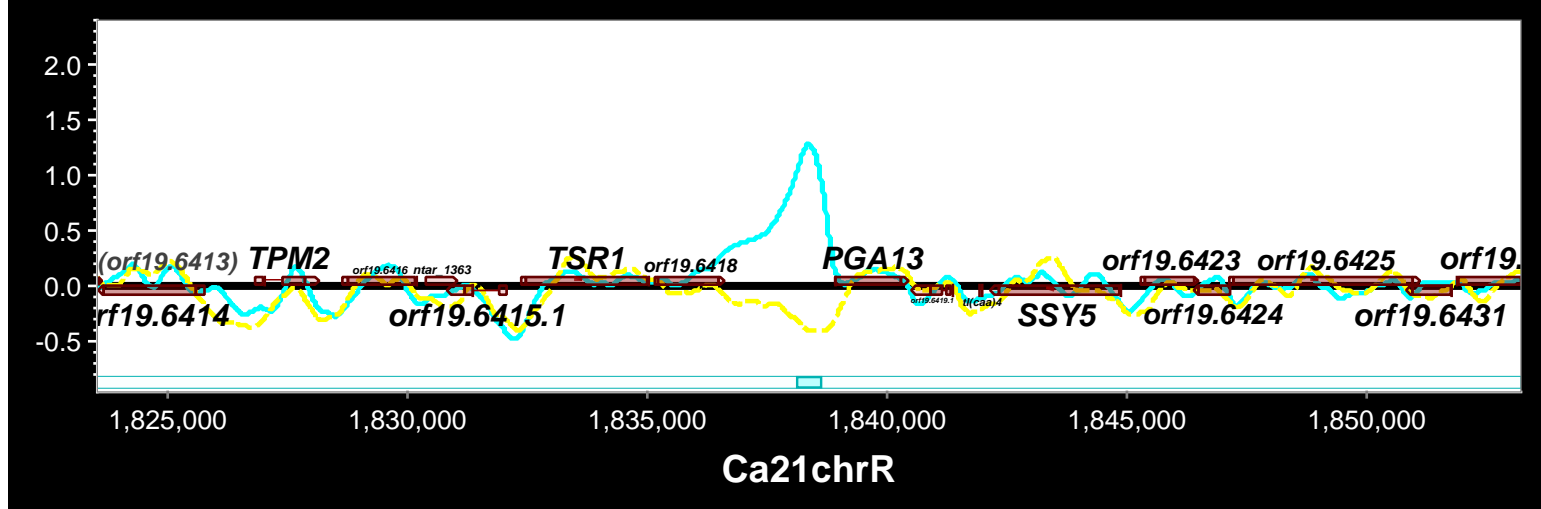

[1.276] Ca21chr7:896791-926474 [+] [orf19.7152, orf19.7151, orf19.7153, NRG1, UTP18]

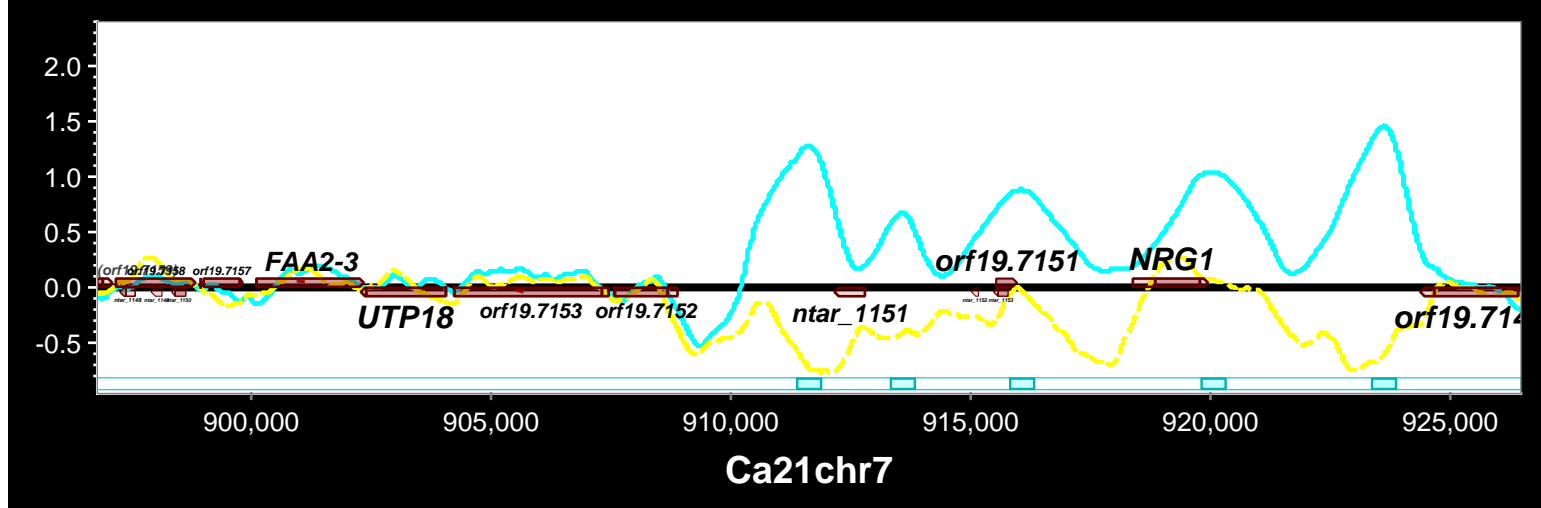

[1.27] Ca21chr4:624245-653928 [+] [PGA54, orf19.2684, orf19.2686, orf19.2687.1, NAN1]

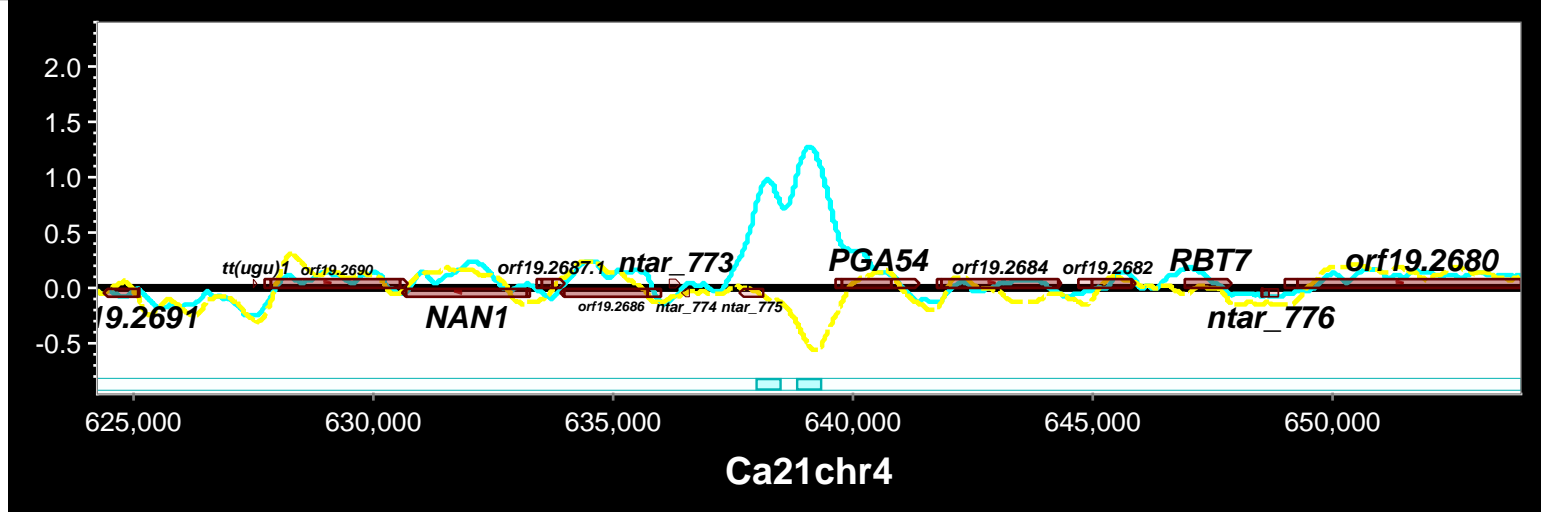

[1.25] Ca21chrR:2089023-2118706 [+] [DEF1, YTA6, FGR46, orf19.7556, orf19.7554]

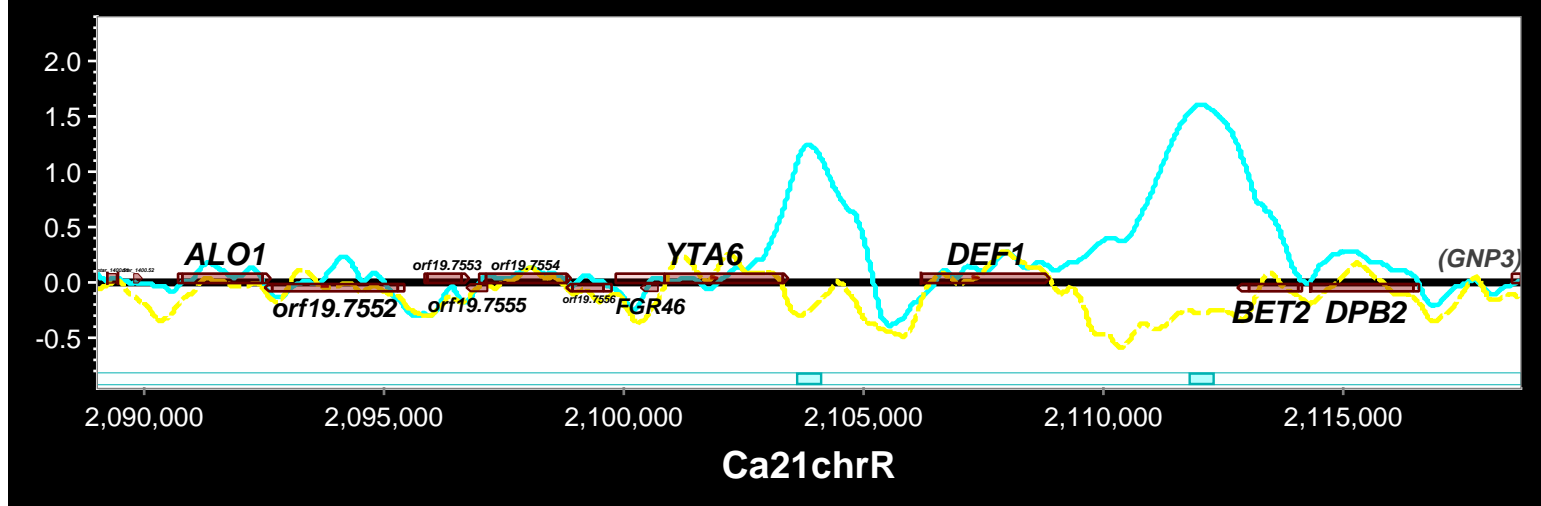

[1.247] Ca21chr3:1343306-1372989 [+] [orf19.7381, orf19.7380, CAM1, FAA2, MNN9]

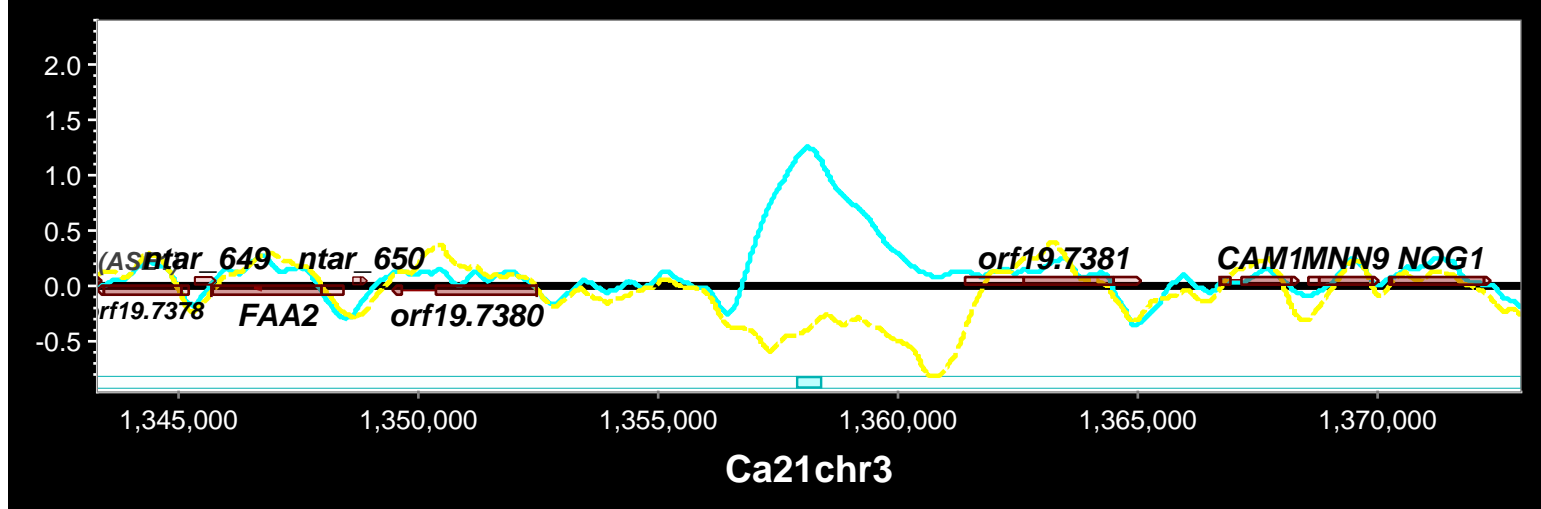

[1.244] Ca21chr1:1578929-1608612 [+] [CPH1, KSP1, orf19.4430, orf19.4435, orf19.4436]

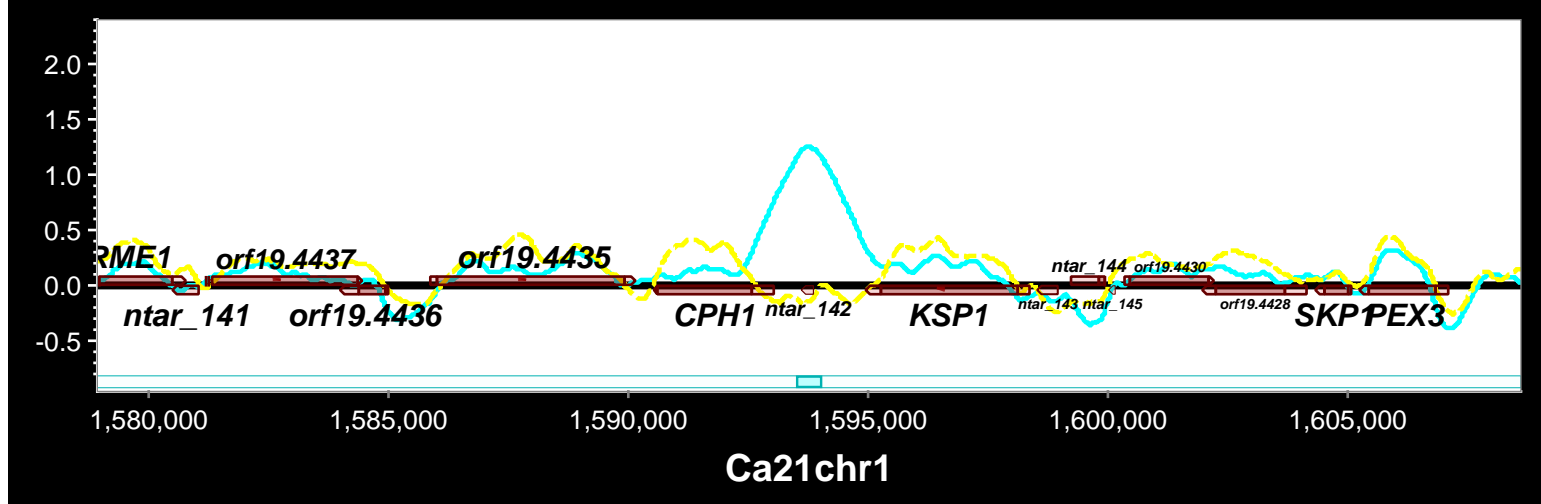

[1.2] Ca21chr2:1053717-1083400 [+] [WH11, orf19.3548, CDC21, orf19.3547, SGO1]

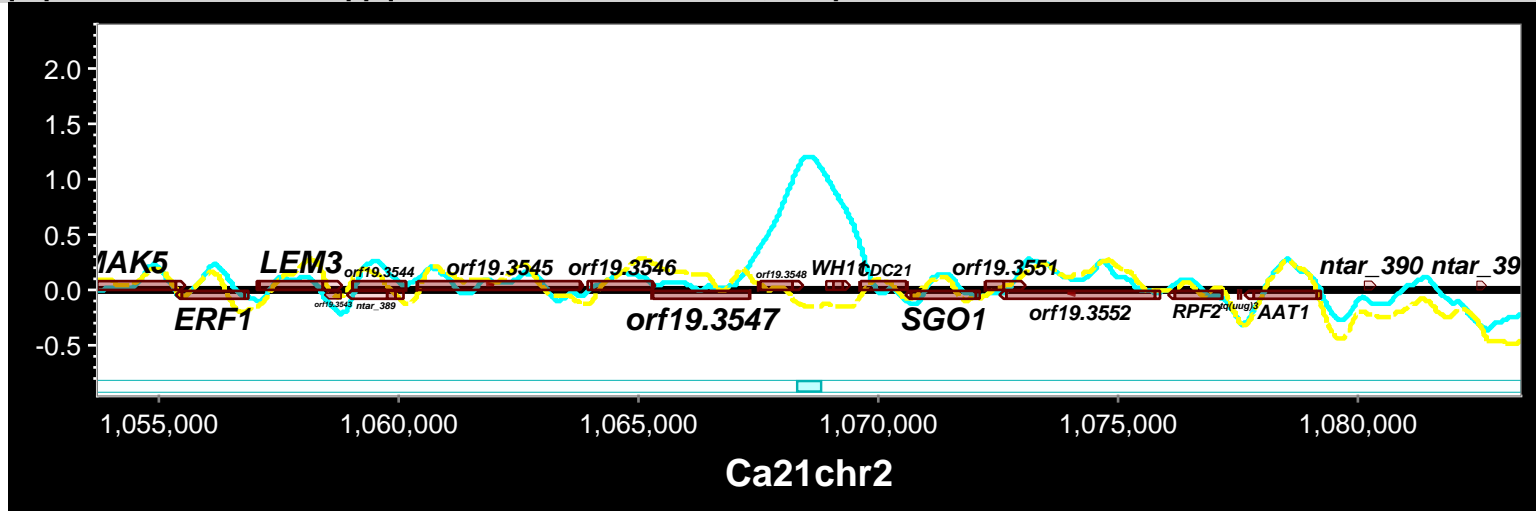

[1.164] Ca21chr1:2507167-2536850 [+] [PHO84, DPP1, orf19.1171, SAM2, ARO7]

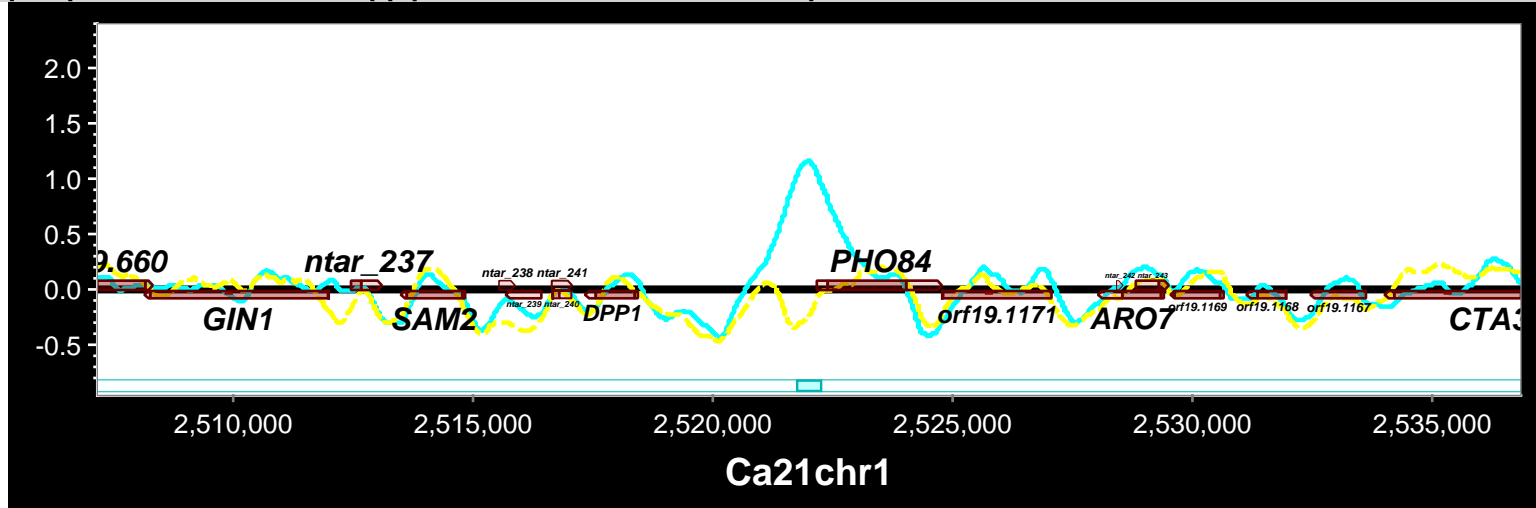

[1.154] Ca21chr3:968774-998457 [+] [orf19.5924, orf19.5921, orf19.5920, orf19.5925, MEA1]

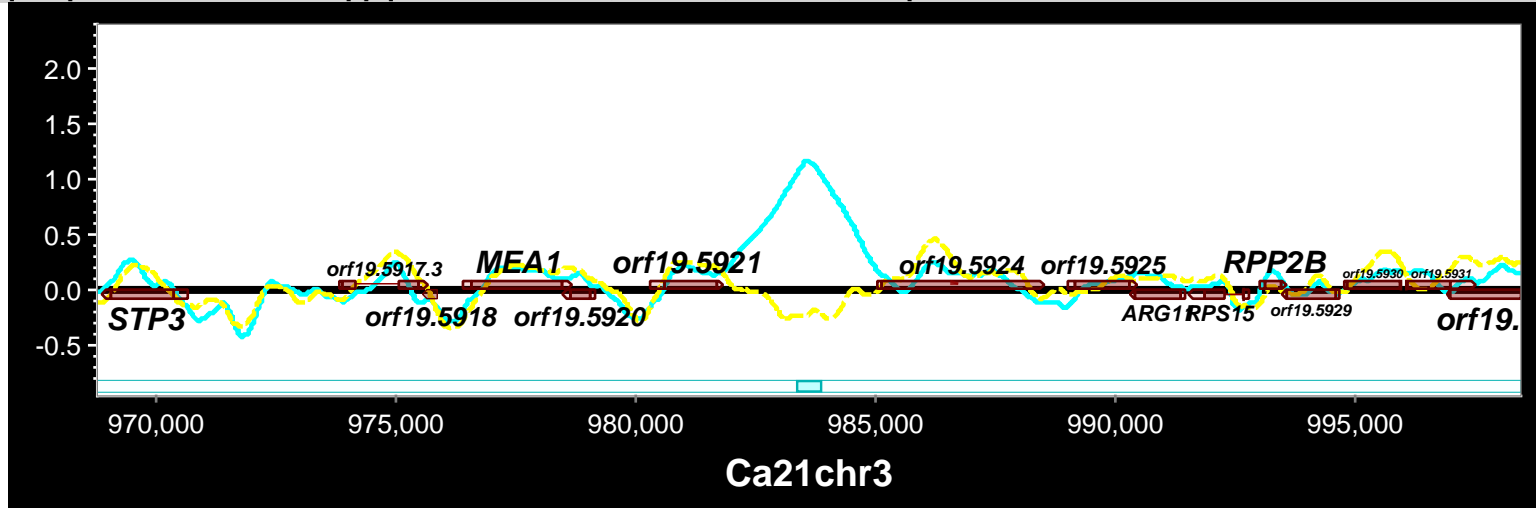

[1.135] Ca21chr1:2976624-3006307 [+] [KIS2, orf19.4998, orf19.4996, CYB2, orf19.4995]

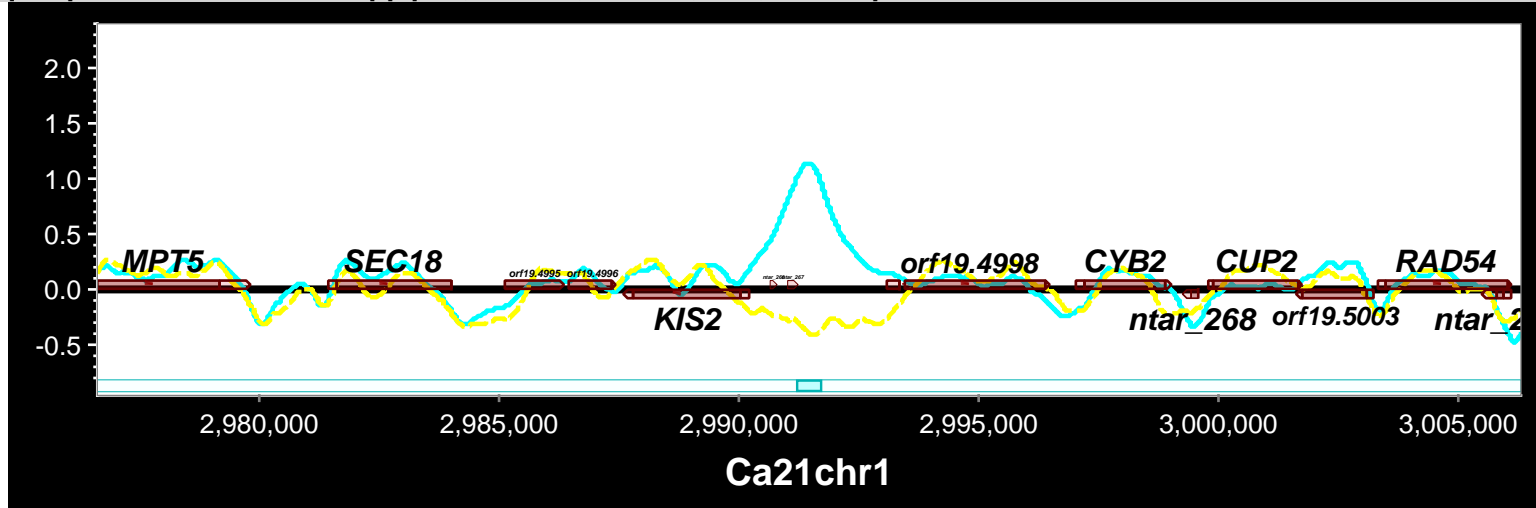

[1.132] Ca21chr5:233604-263287 [+] [CLN3, orf19.1959, orf19.1961, CYC3, orf19.1956]

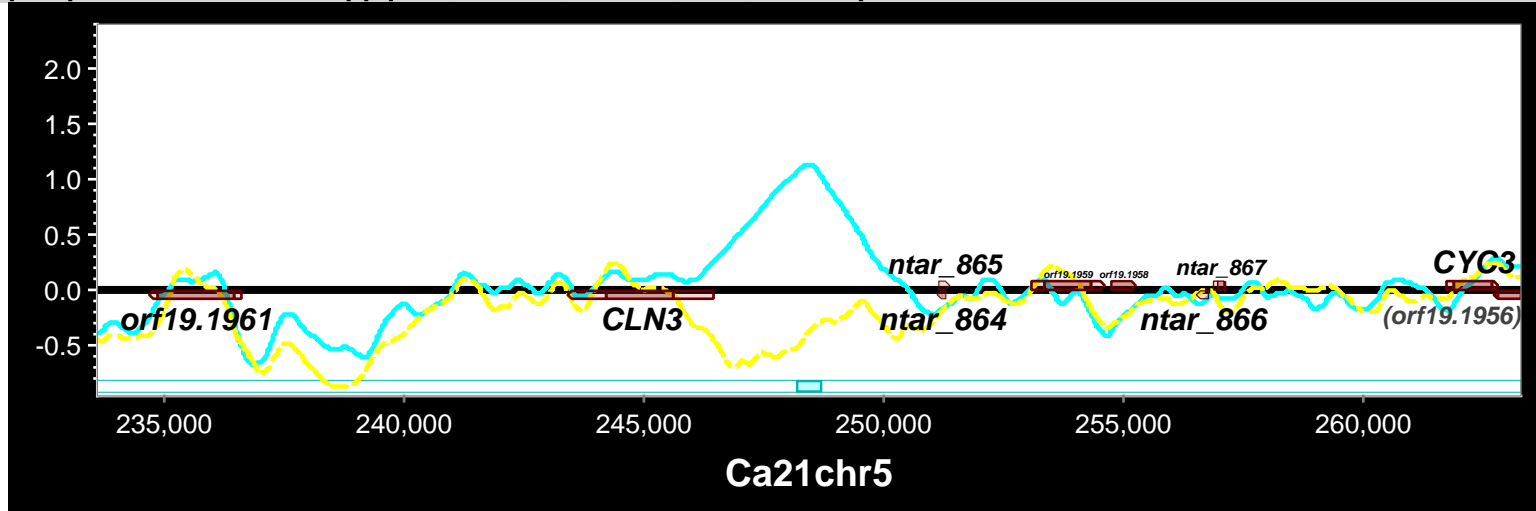

[1.113] Ca21chr1:3058643-3088326 [+] [SIM1, orf19.5033, orf19.5034, SSK1, orf19.5035]

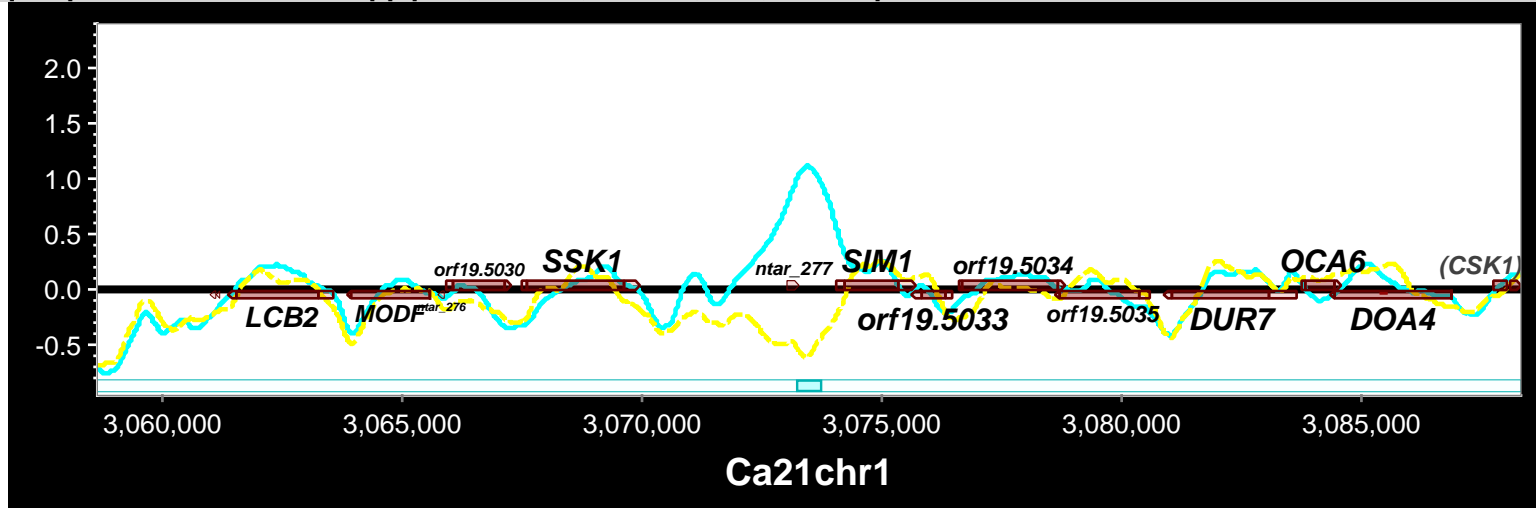

[1.108] Ca21chr3:933686-963369 [+] [ADE2, TEC1, orf19.5905, RPL19A, RAX1]

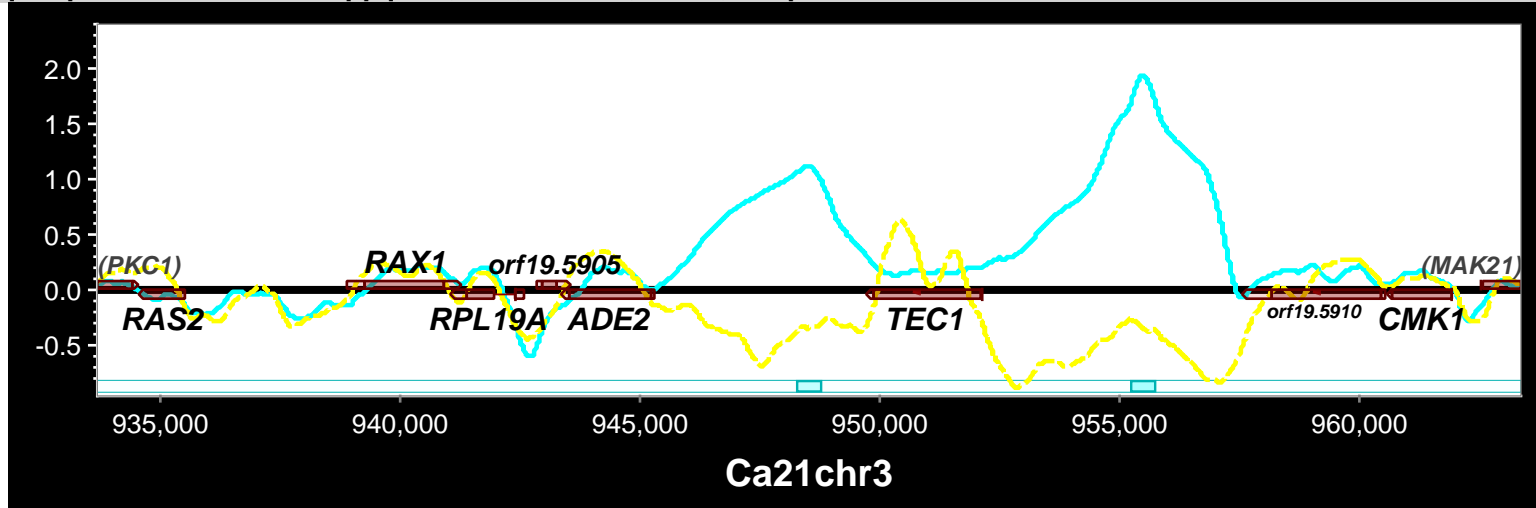

[1.088] Ca21chr1:1509268-1538951 [+] [GAP4, TAF145, orf19.6194, orf19.4455, orf19.6195]

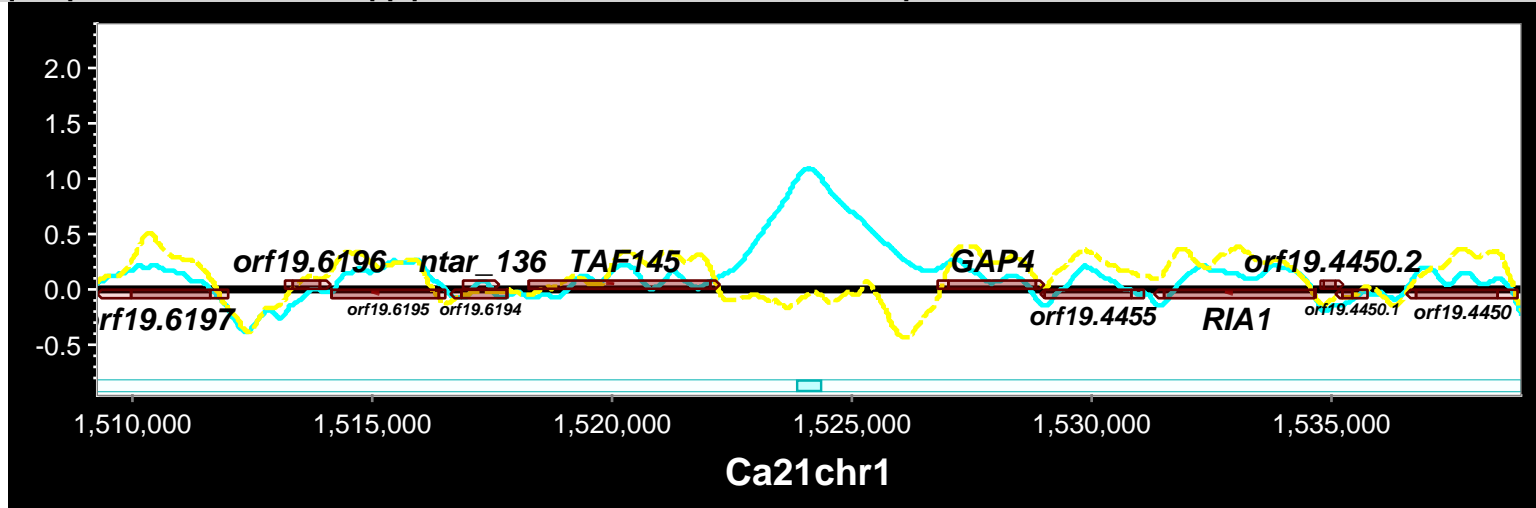



[1.084] Ca21chr1:389934-419617 [+] [orf19.4528, HGT1, orf19.4529, orf19.4530.1, HSP30]

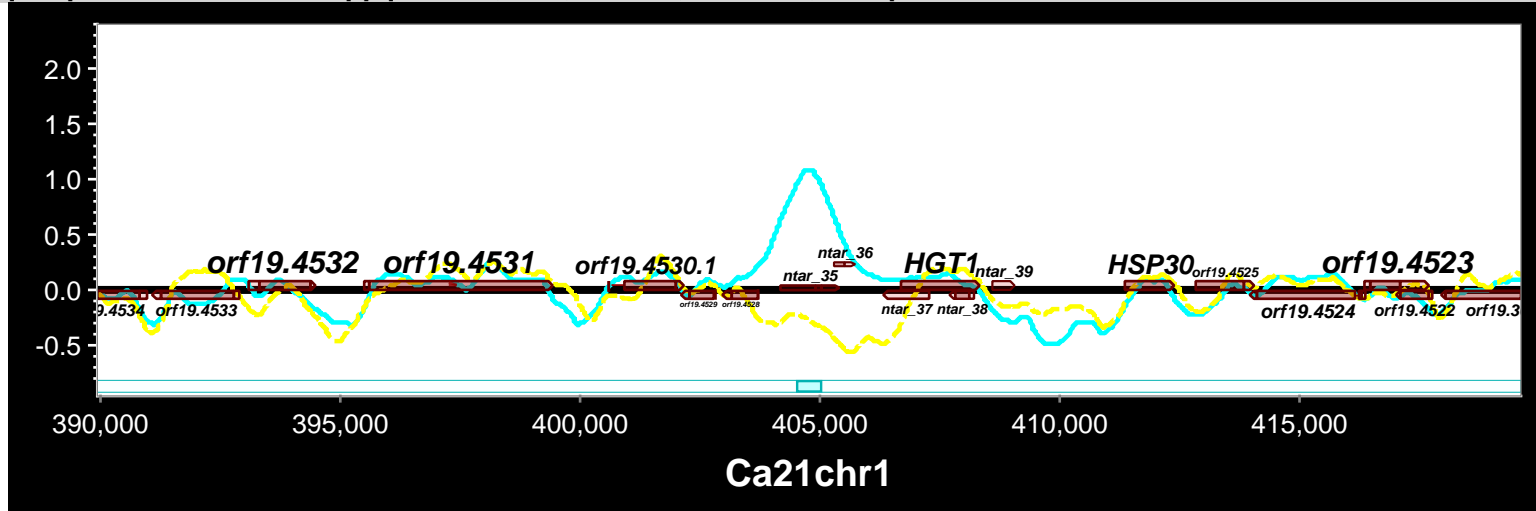

[1.083] Ca21chr6:398804-428487 [+] [GPD2, orf19.692, orf19.3508, PLB2, MCR1]

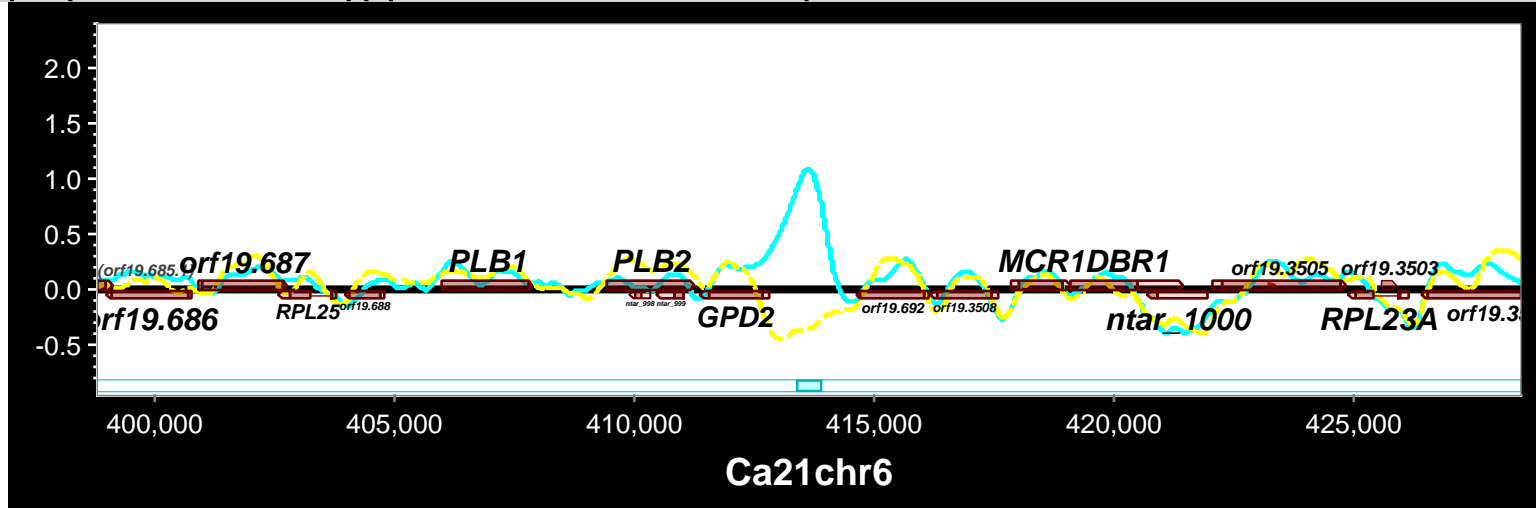

[1.077] Ca21chr6:826141-855824 [+] [IHD1, PGA61, tA(UGC)2, orf19.5763, SNQ2]

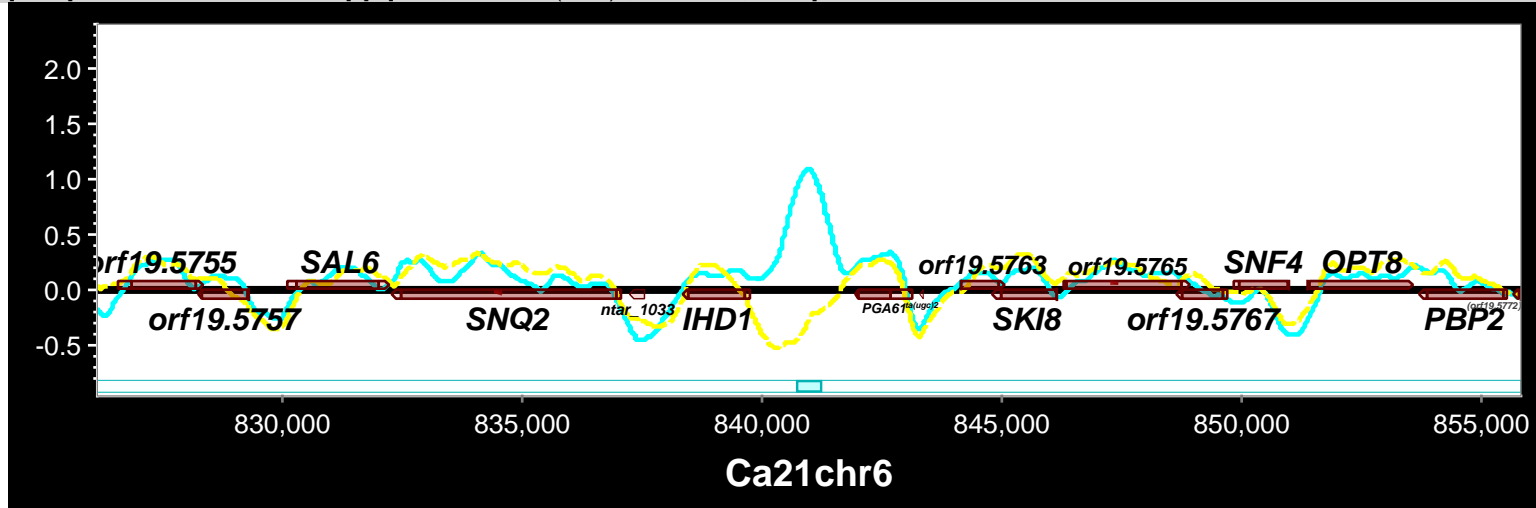

[1.058] Ca21chr1:1343765-1373448 [+] [orf19.6273, PBR1, orf19.6272, orf19.6275, orf19.6271]

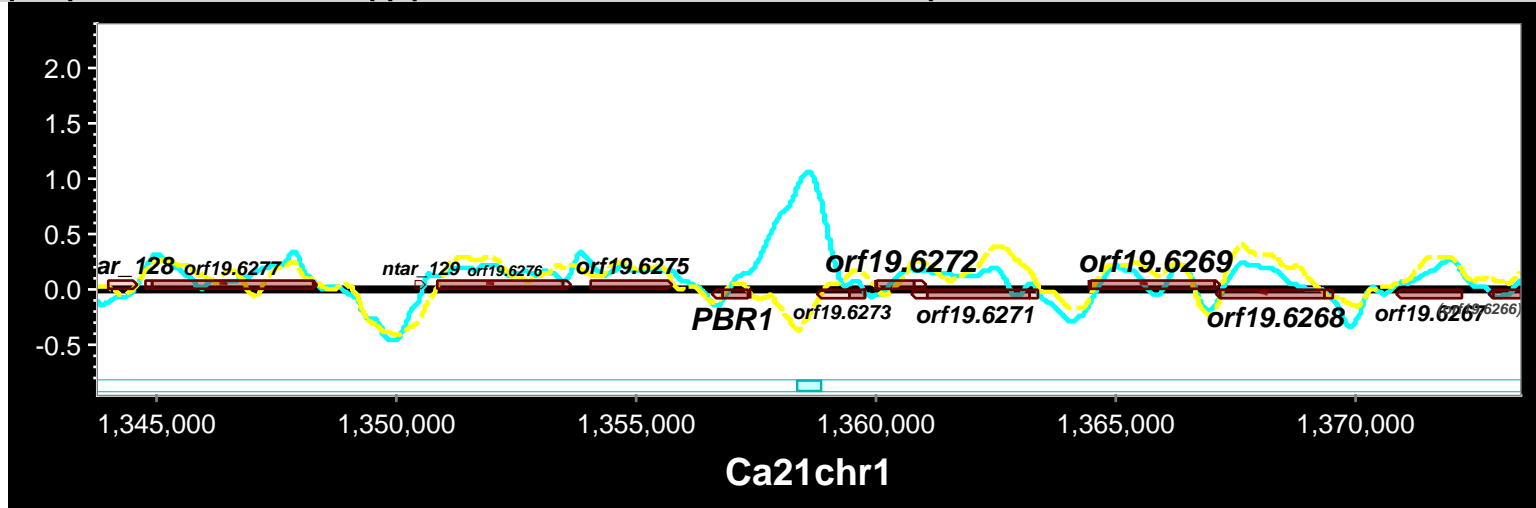

[1.044] Ca21chr1:1851523-1881206 [+] [EAF6, ENO1, orf19.397, orf19.398, orf19.394]

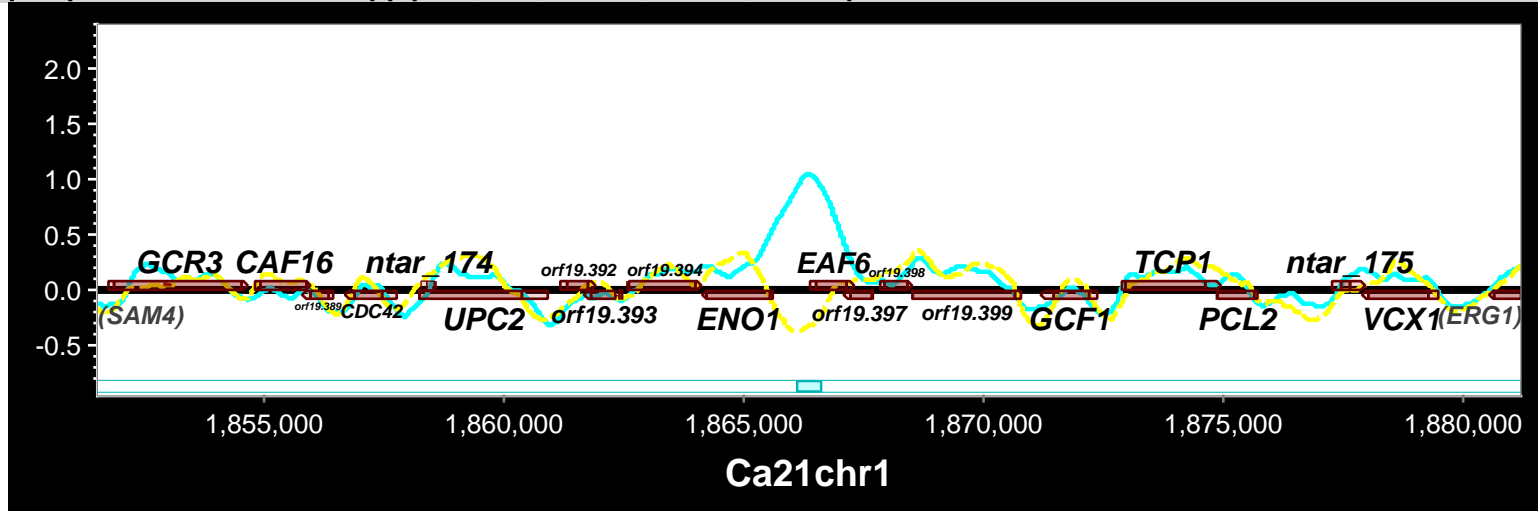

[1.043] Ca21chr3:481537-511220 [+] [GFA1, orf19.1617, FGR23, orf19.1618.1, orf19.1619]

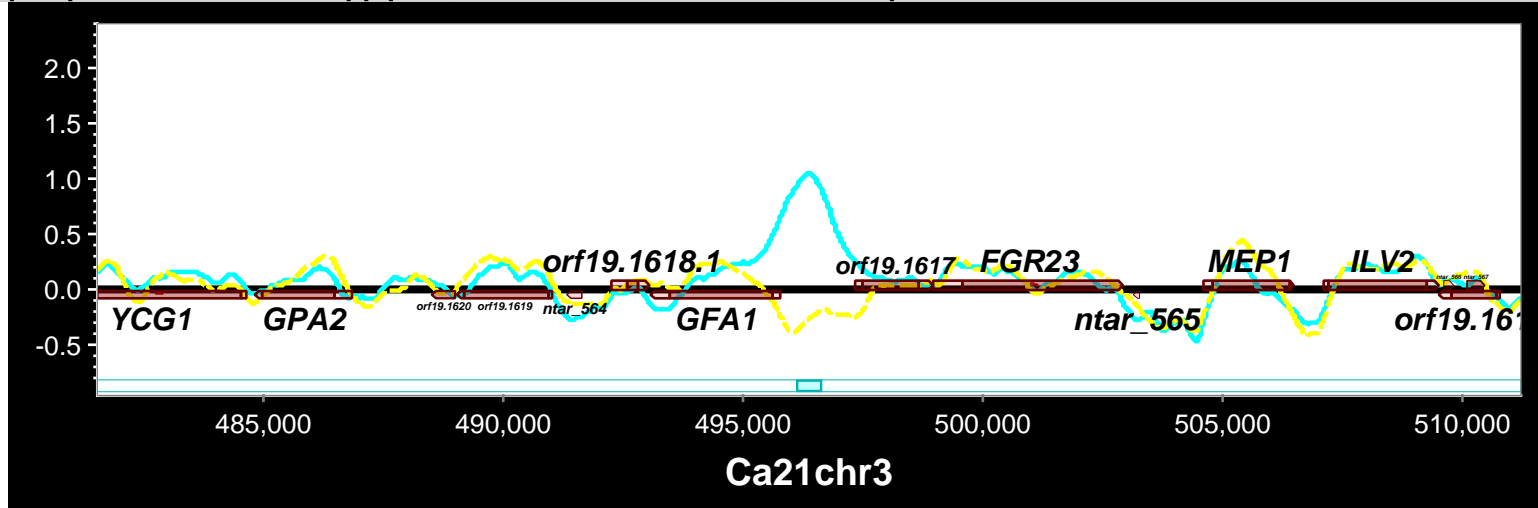

[1.033] Ca21chr7:905224-934907 [+] [NRG1, orf19.7151, orf19.7149, TPO2, orf19.7144]

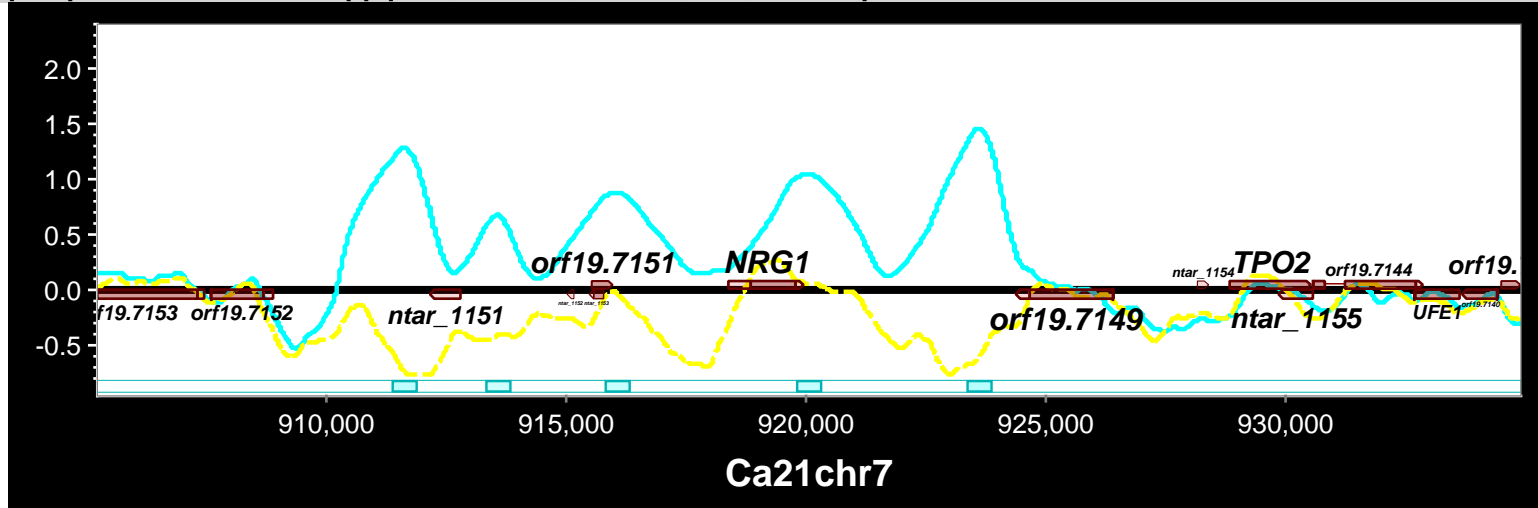

[1.026] Ca21chr2:1119086-1148769 [+] [orf19.6871, orf19.6869, orf19.6868, orf19.6867, orf19.6866]

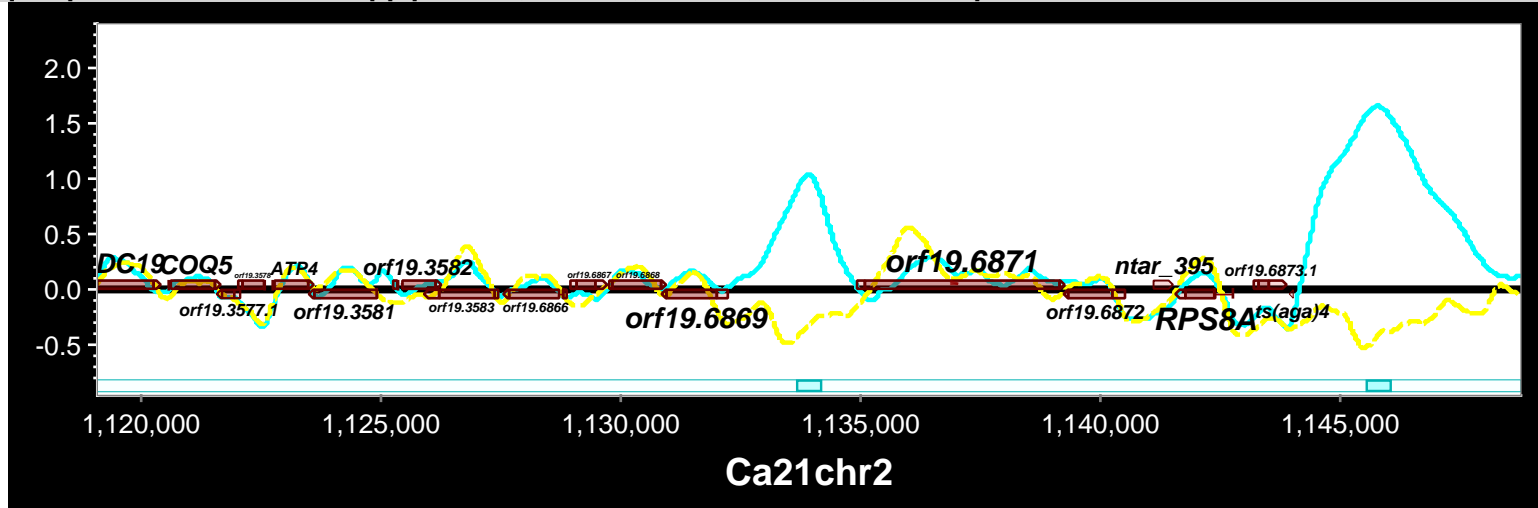

[1.012] Ca21chr3:988359-1018042 [+] [orf19.5933, orf19.5934, orf19.5932, orf19.5935, orf19.5931]

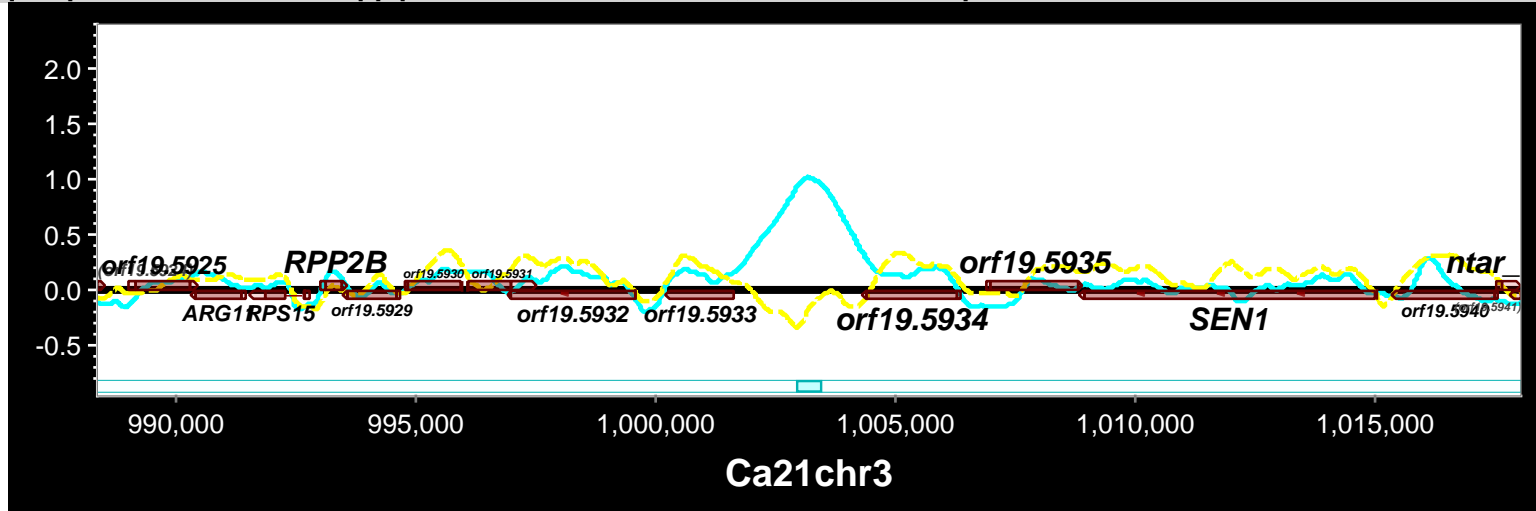

[0.989] Ca21chr7:98519-128202 [+] [orf19.7054, GAC1, orf19.7056, orf19.7057, orf19.7058]

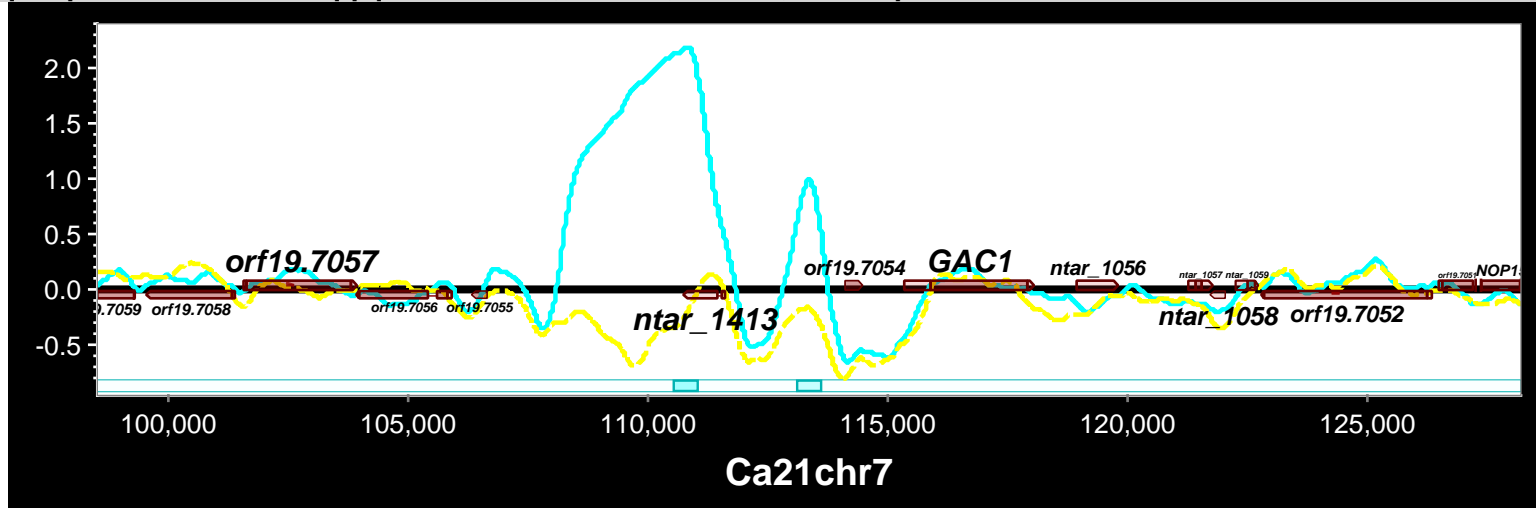

[0.987] Ca21chrR:2214338-2244021 [+] [orf19.7624, PGA1, EIF4E, SPT3, orf19.7627]

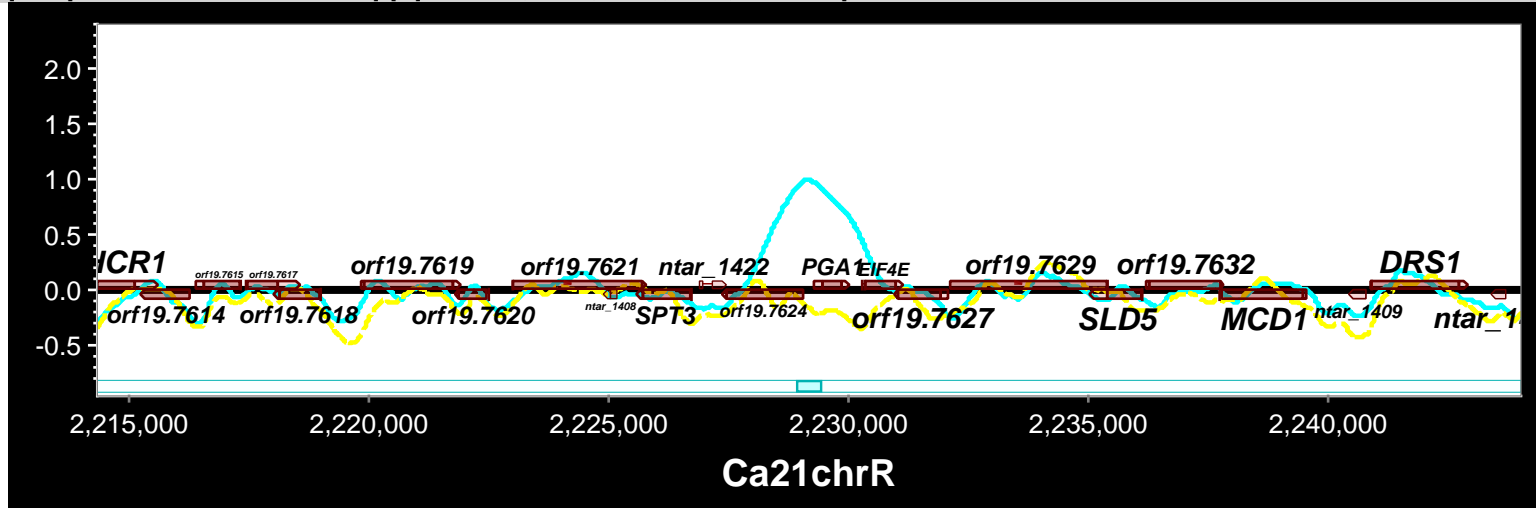

[0.978] Ca21chr4:623399-653082 [+] [PGA54, orf19.2686, orf19.2684, orf19.2687.1, NAN1]

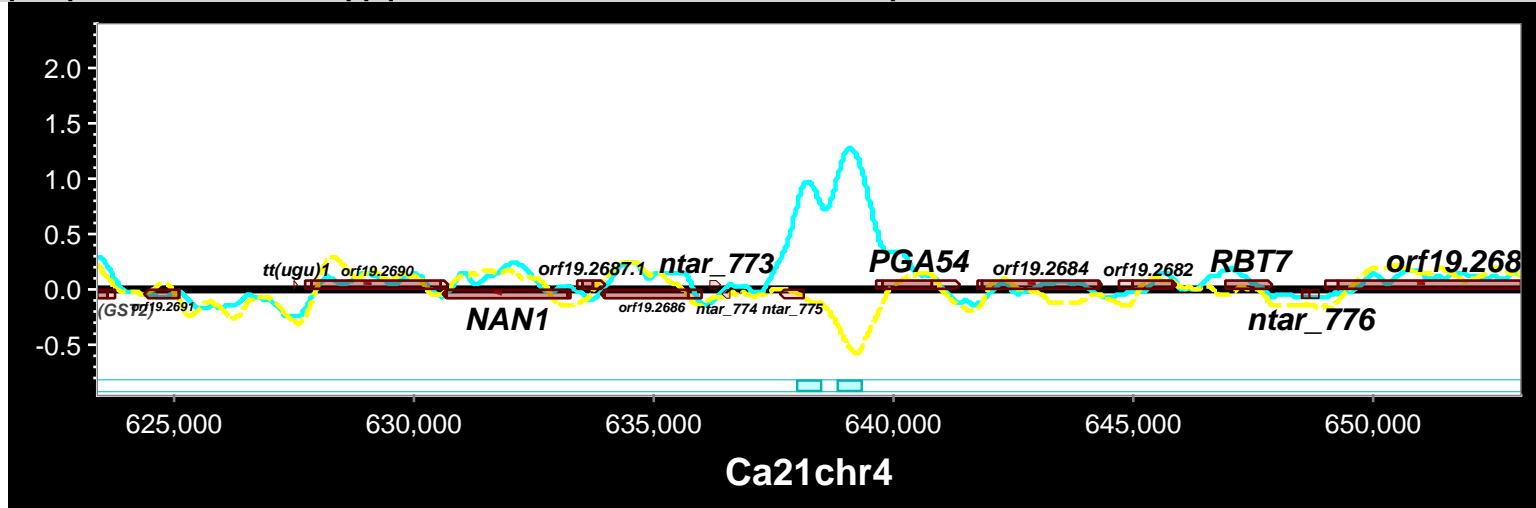

[0.976] Ca21chr4:4165-33848 [+] [RBT5, PGA7, FRP1, orf19.5633, HIS4]

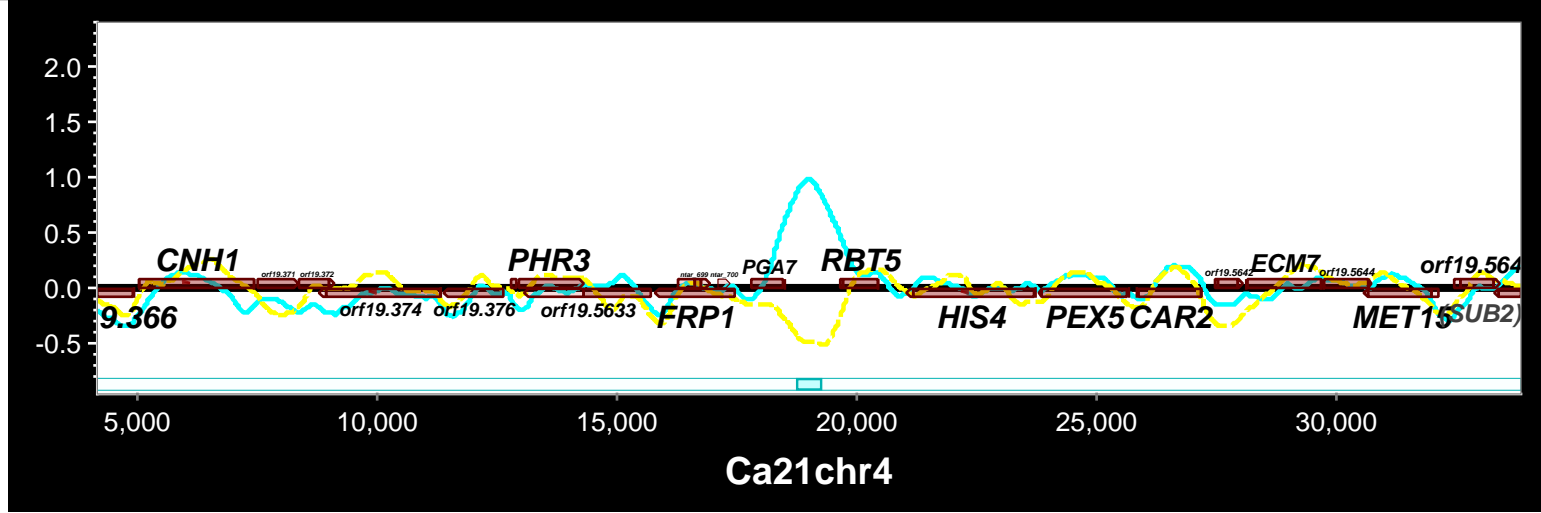

[0.971] Ca21chr4:1425094-1454777 [+] [CEK1, MET13, PRI2, CDC68, orf19.2888]

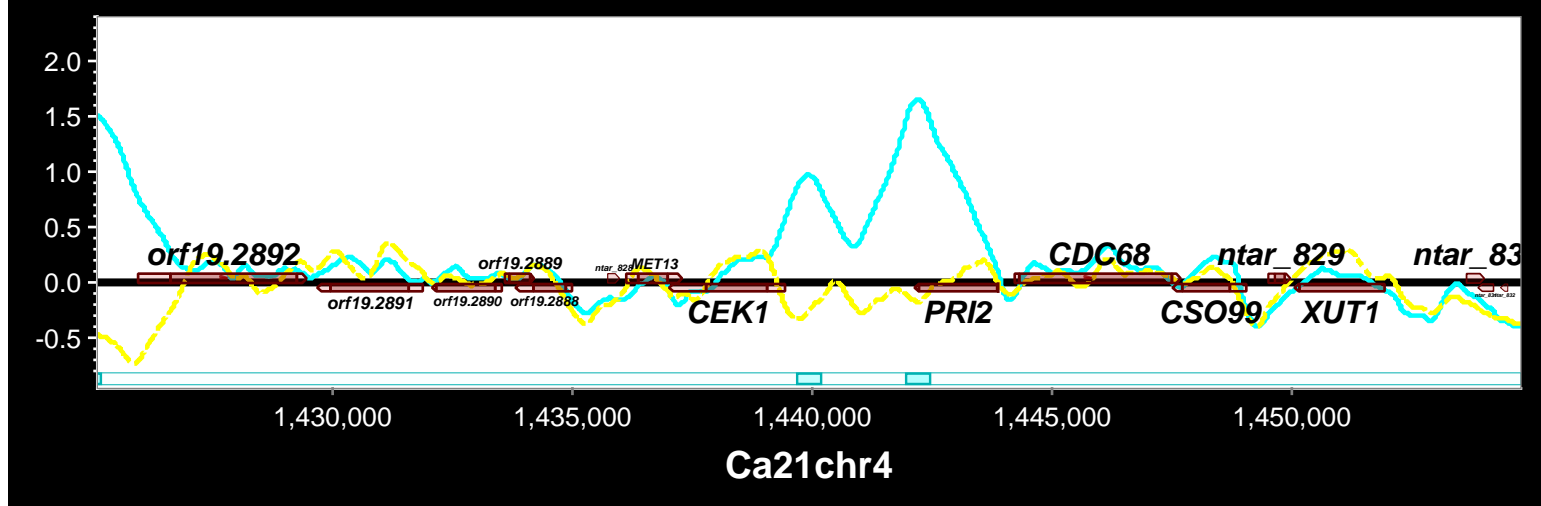

[0.949] Ca21chr1:1307794-1337477 [+] [orf19.1821, UME6, orf19.1823, PGA50, orf19.1825]

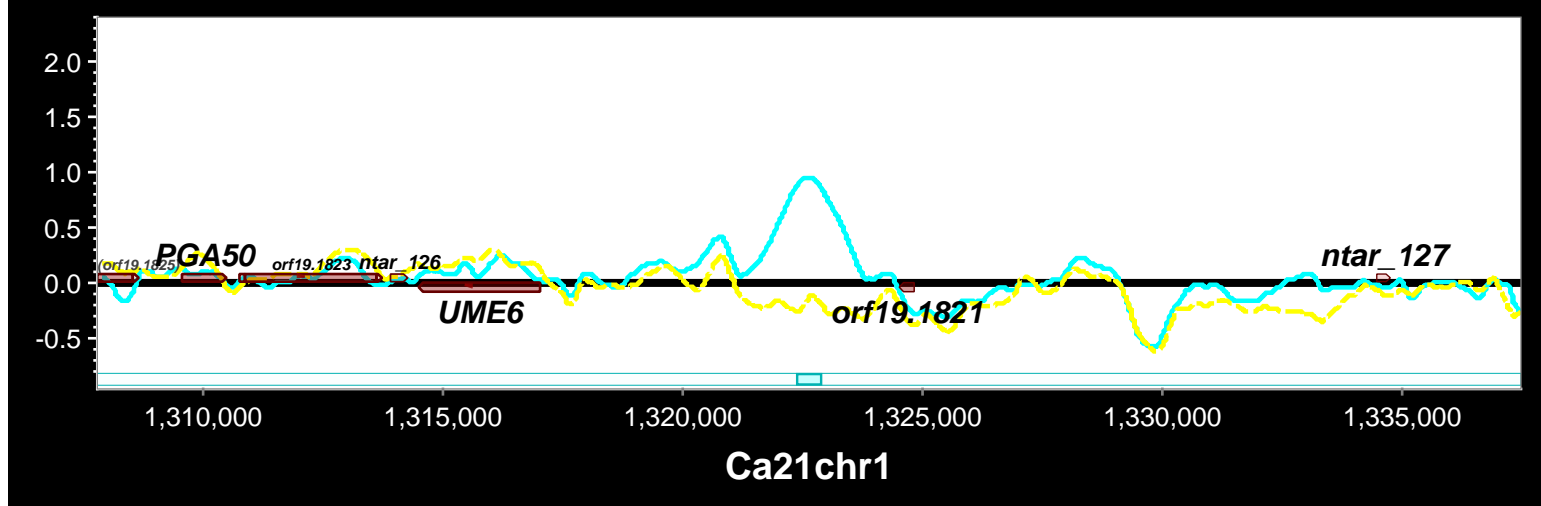

[0.945] Ca21chrR:762318-792001 [+] [CIT1, orf19.4394, DEM1, orf19.4391, orf19.4395]

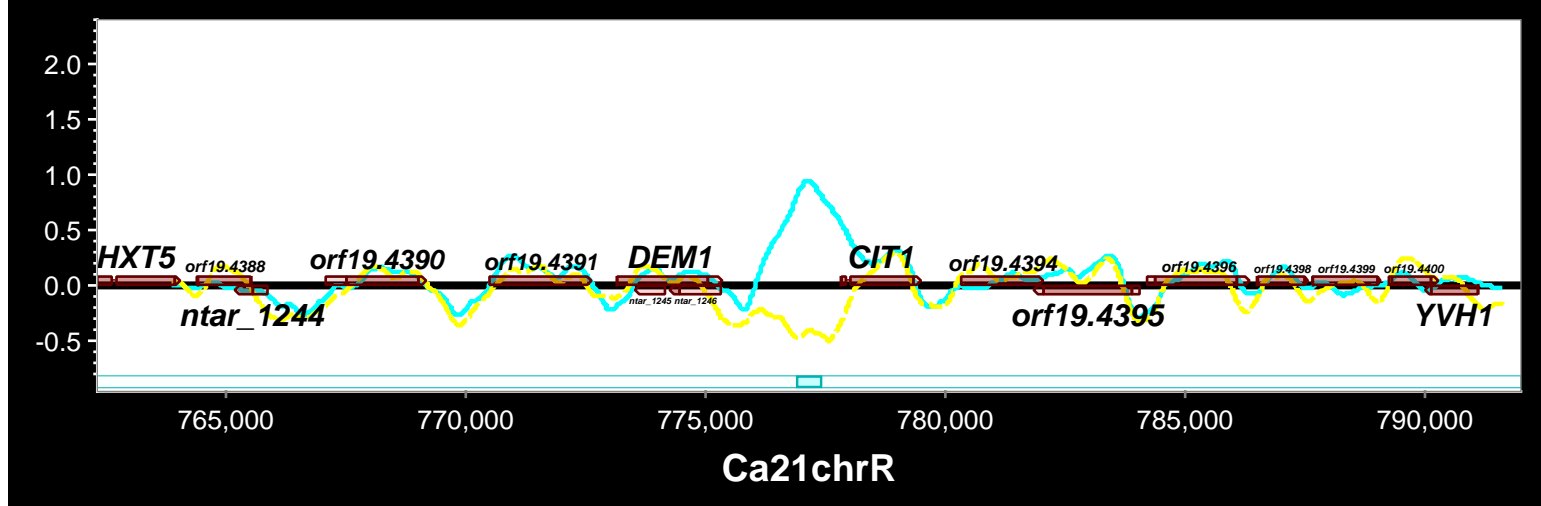

[0.929] Ca21chrR:1511375-1541058 [+] [CRZ2, URA2, ALS3, orf19.1815, SPT10]

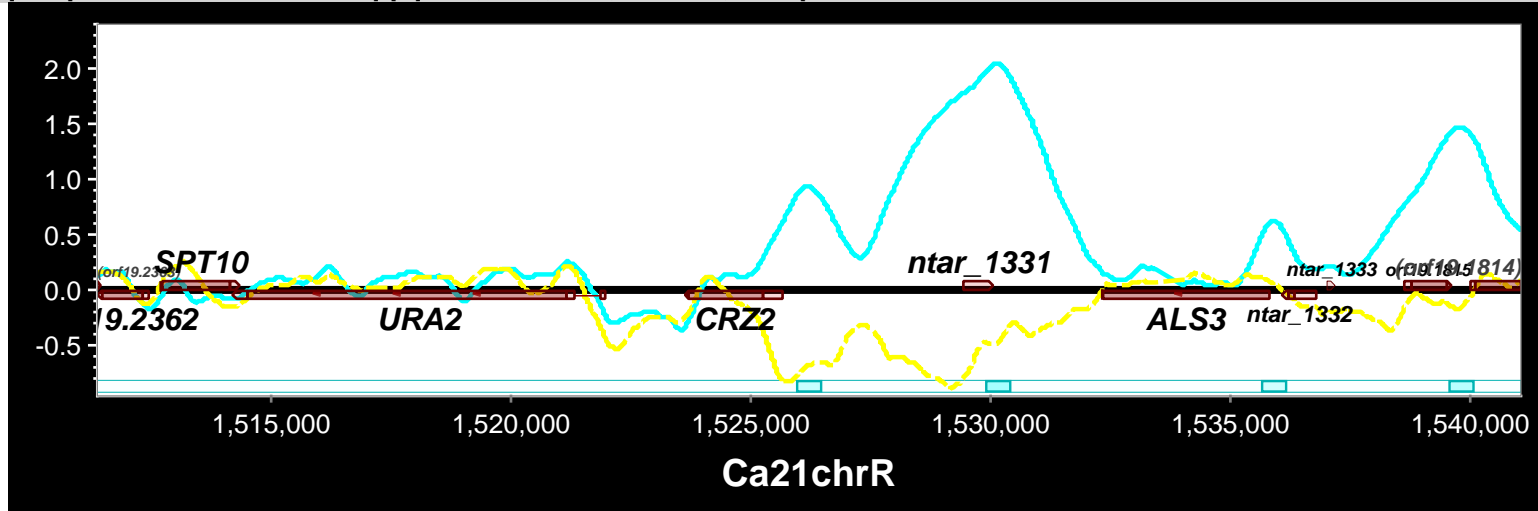

[0.928] Ca21chr1:519977-549660 [+] [DIP5, tR(UCU)4, orf19.2943.5, PUT4, SCW4]

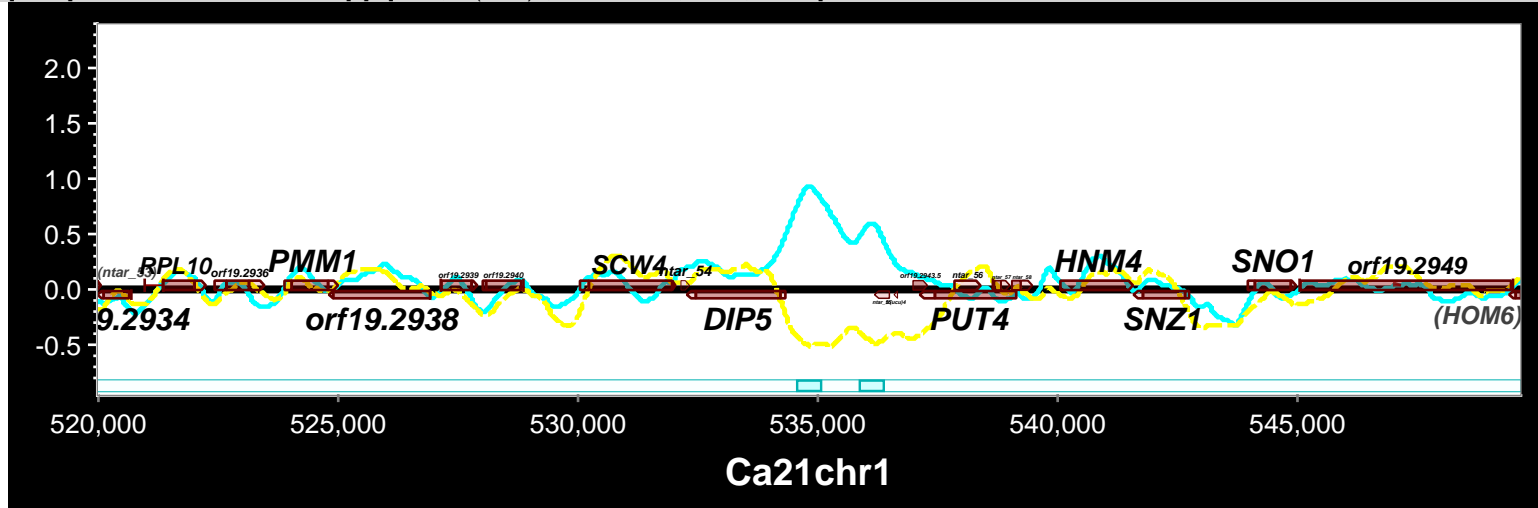

[0.924] Ca21chr4:816507-846190 [+] [RAM1, FGR28, orf19.1595, orf19.5045, orf19.789.1]

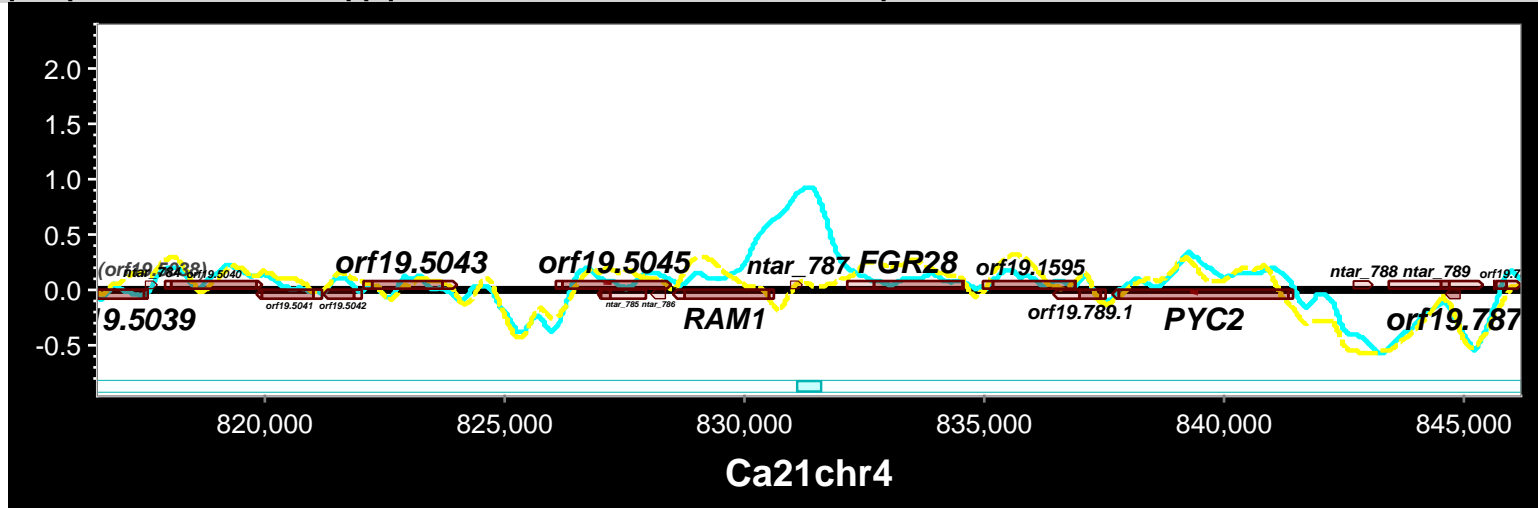

[0.913] Ca21chr1:2615798-2645481 [+] [KIP4, orf19.5264, SER33, orf19.5262, orf19.5266]

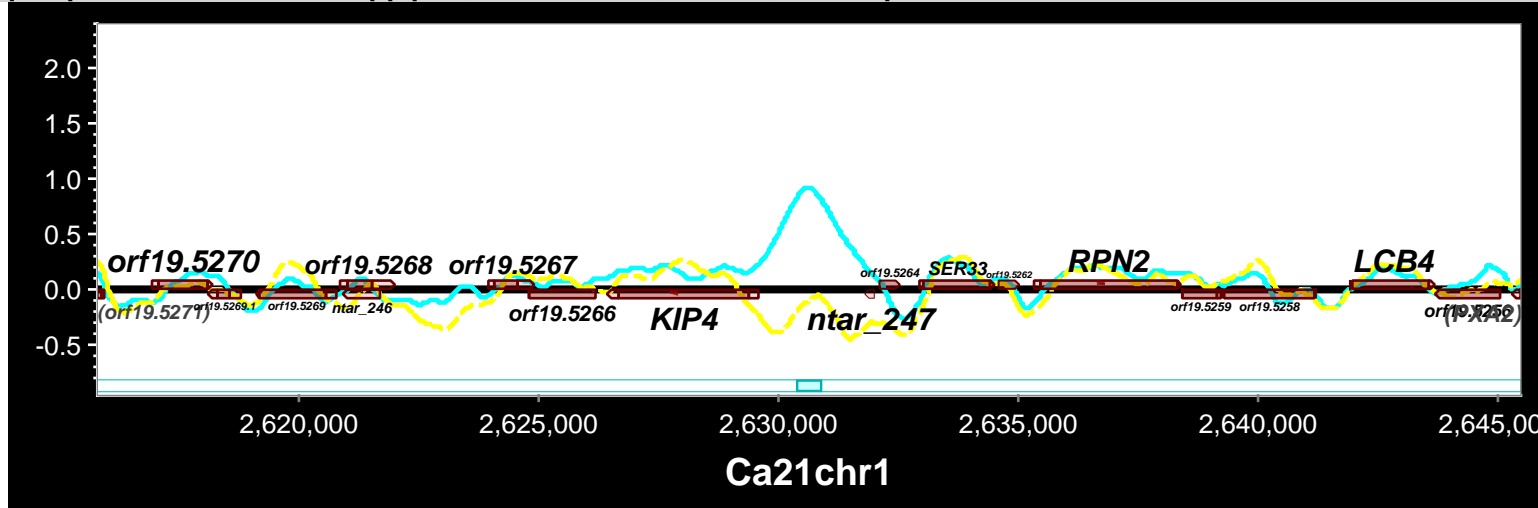

[0.913] Ca21chr2:839623-869306 [+] [DCK1, SSY1, SNRNAU2, orf19.813, DCK2]

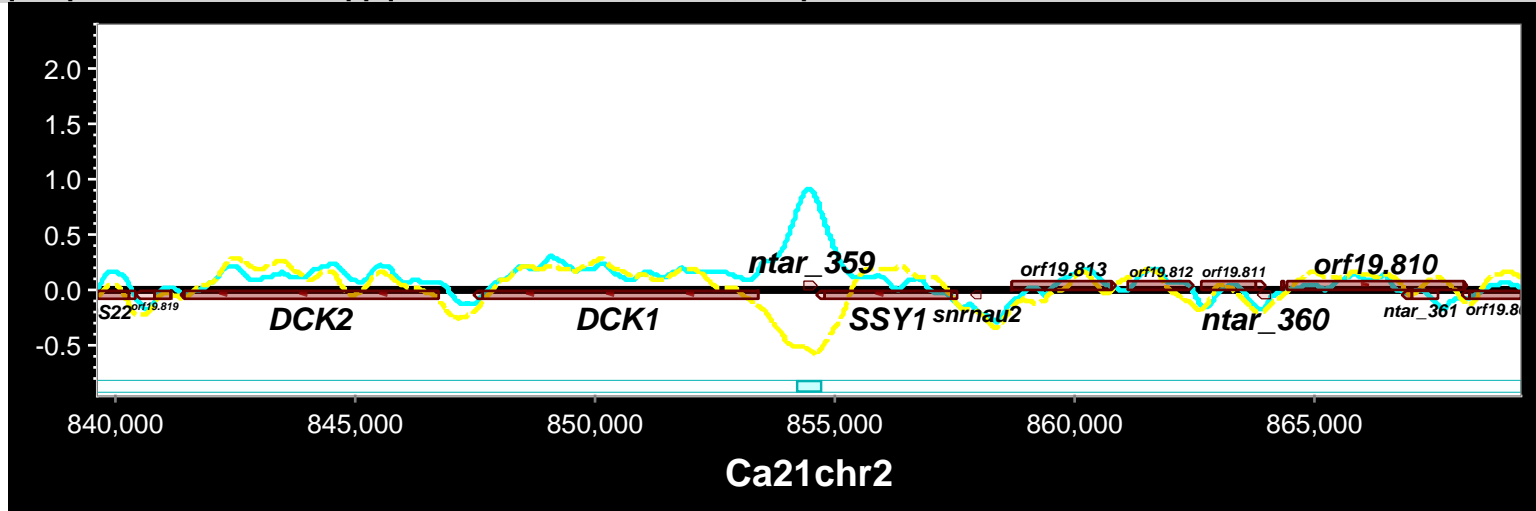

[0.902] Ca21chr6:693750-723433 [+] [orf19.5626, orf19.5625, ARP4, orf19.5627, orf19.5628]

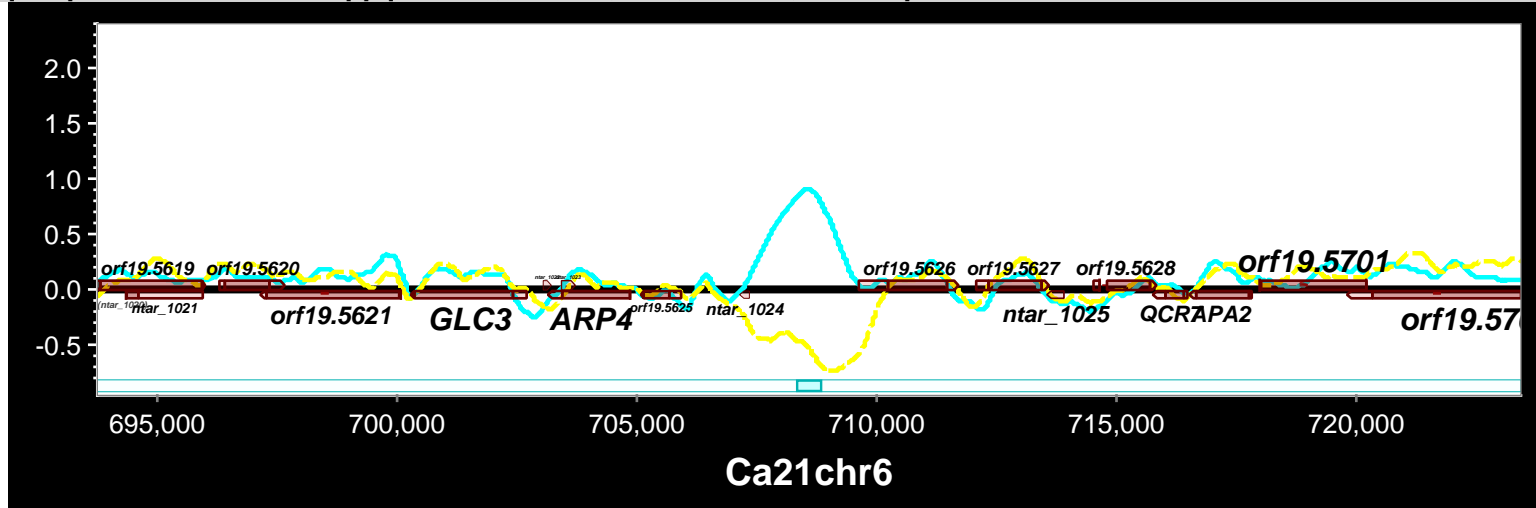

[0.88] Ca21chr4:733107-762790 [+] [RBT1, orf19.1326, HWP2, ECM38, RAD2]

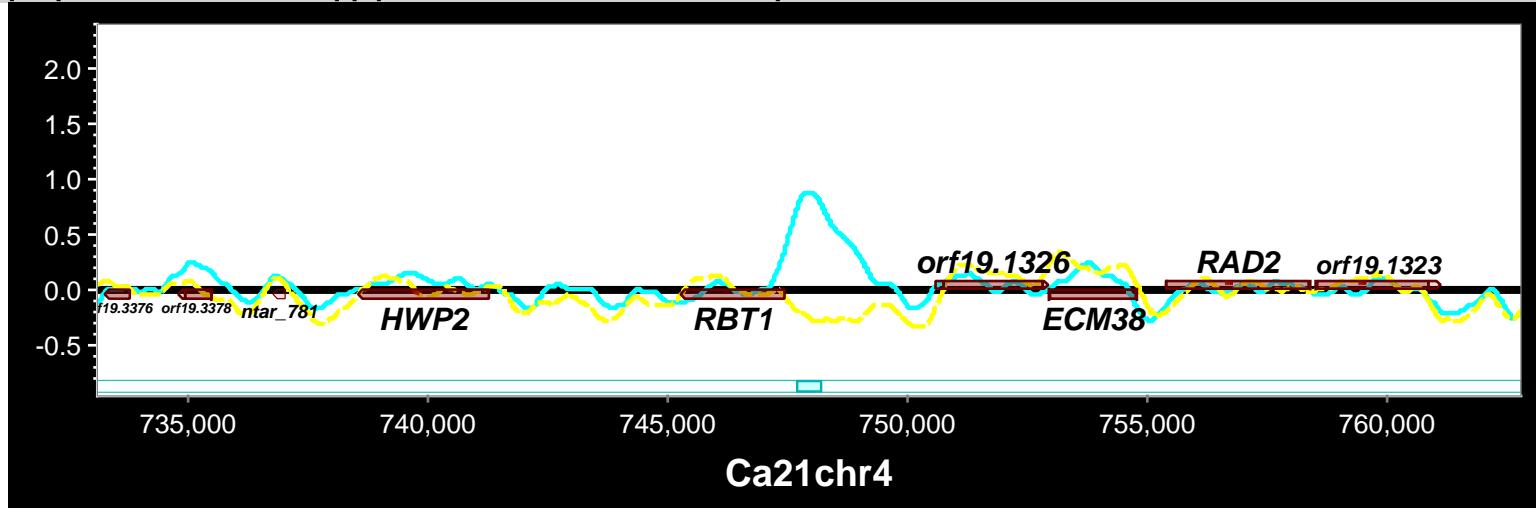

[0.88] Ca21chr7:901232-930915 [+] [orf19.7151, NRG1, orf19.7152, orf19.7153, orf19.7149]

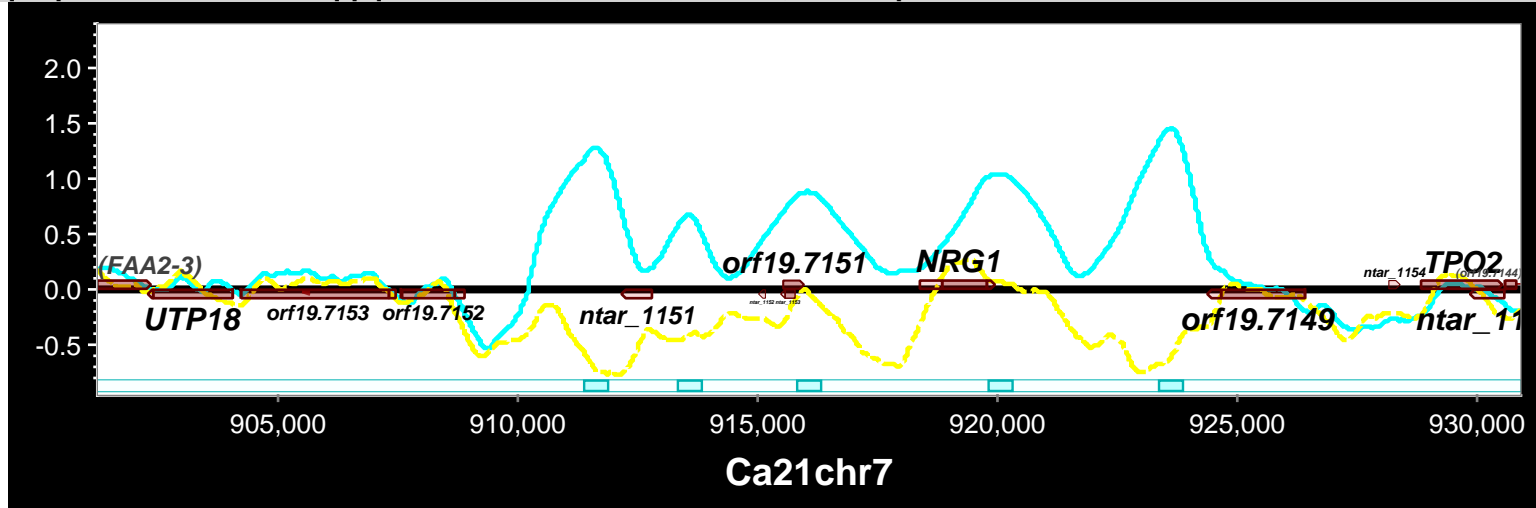

[0.86] Ca21chr5:909130-938813 [+] [orf19.3897, CHT2, orf19.3898, SDC1, orf19.3900]

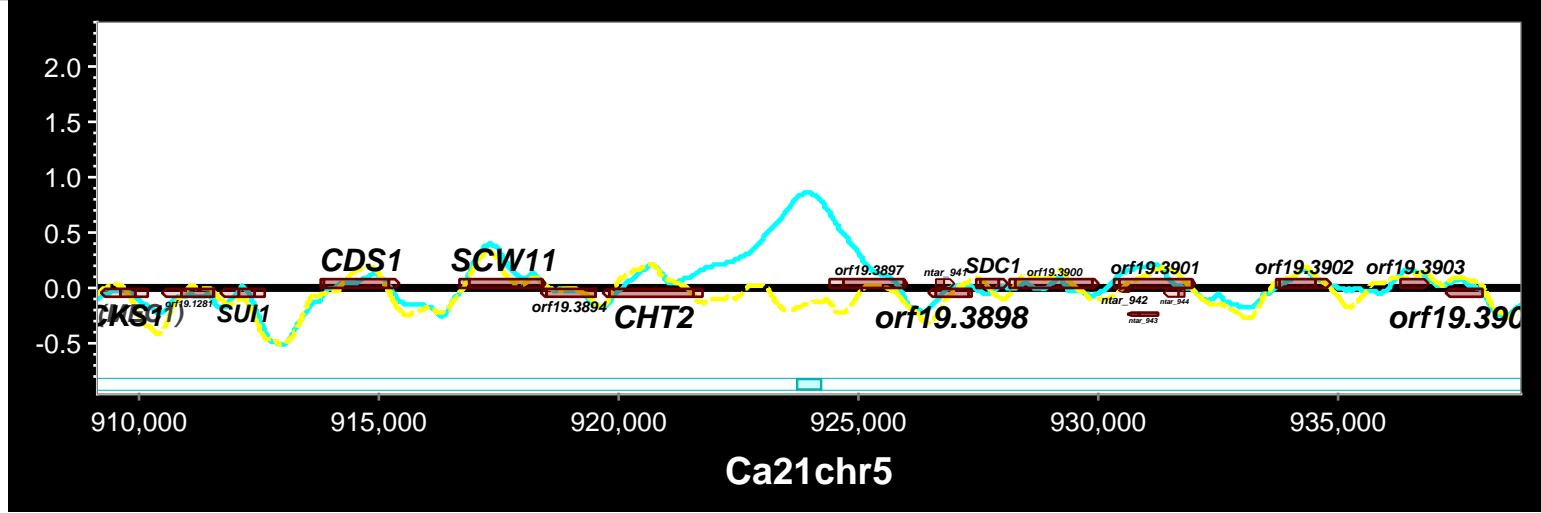

[0.758] Ca21chrR:1251467-1281150 [+] [SOK1, SFL1, orf19.3848, orf19.3851, orf19.457]

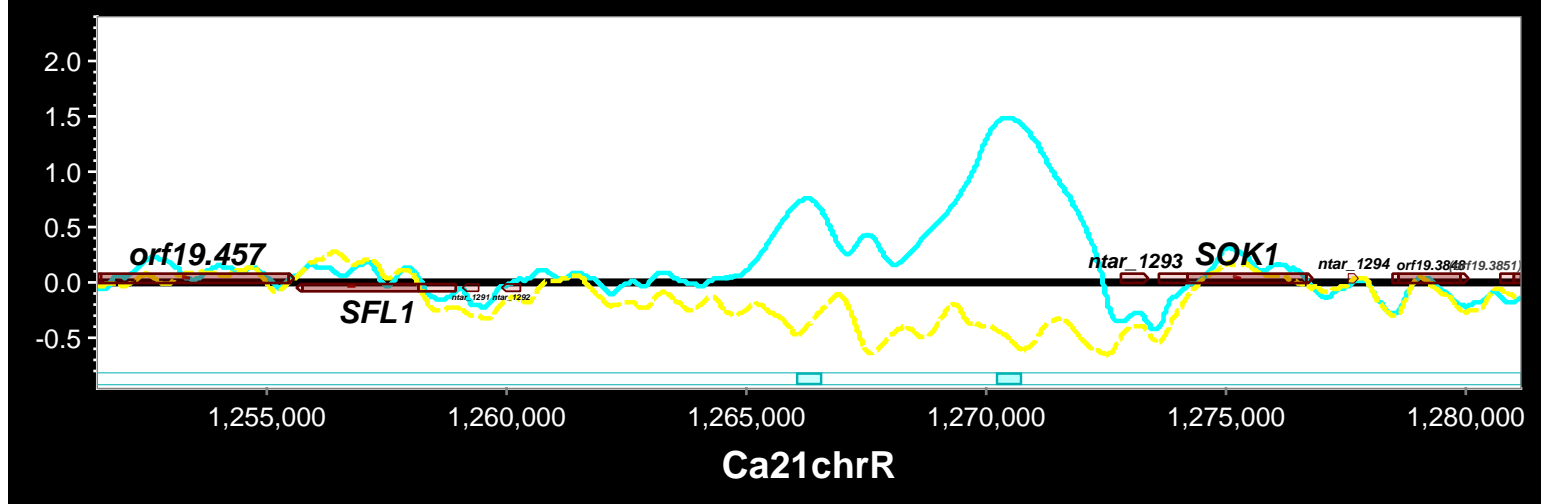

[0.751] Ca21chr6:139007-168690 [+] [orf19.3643, SUN41, CAN3, orf19.3644, GPX2]

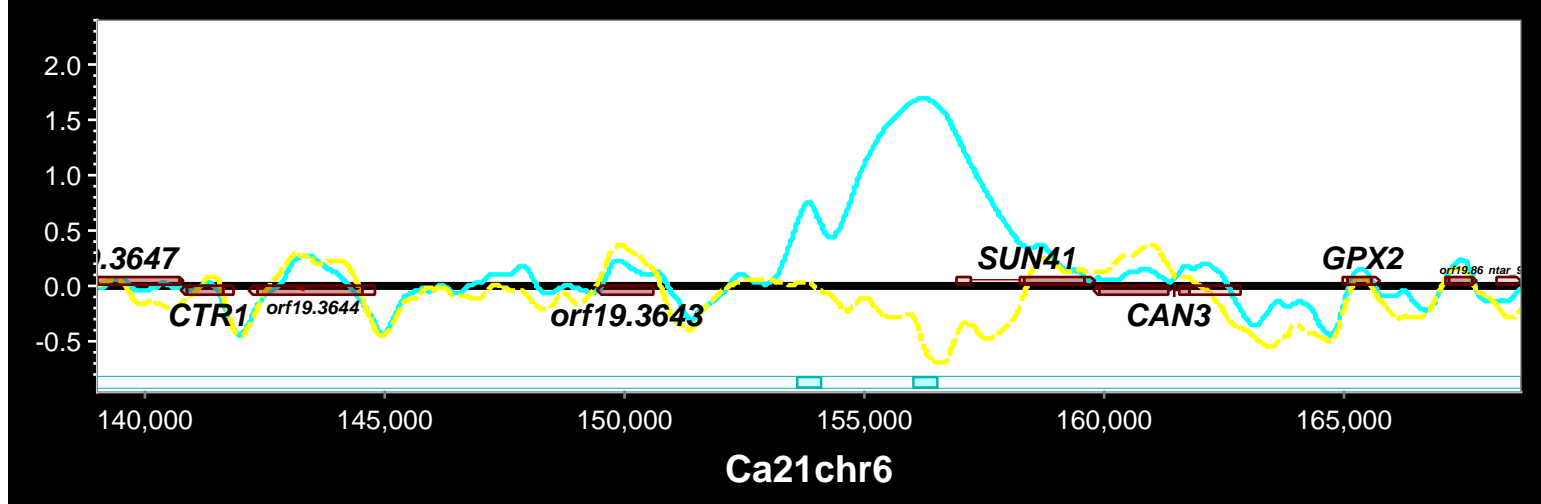

[0.746] Ca21chr1:3146757-3176440 [+] [orf19.7250, RIM101, WSC4, orf19.7252, orf19.7245]

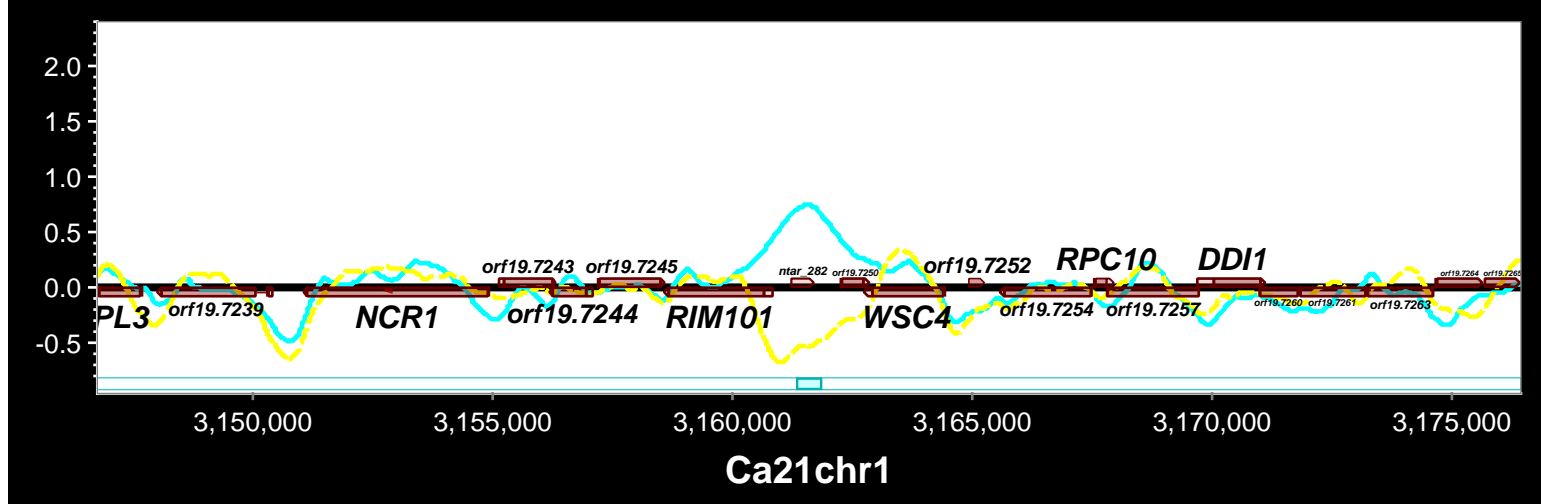

[0.741] Ca21chr1:2179190-2208873 [+] [SWE1, SFU1, DBP3, ERO1, orf19.4872]

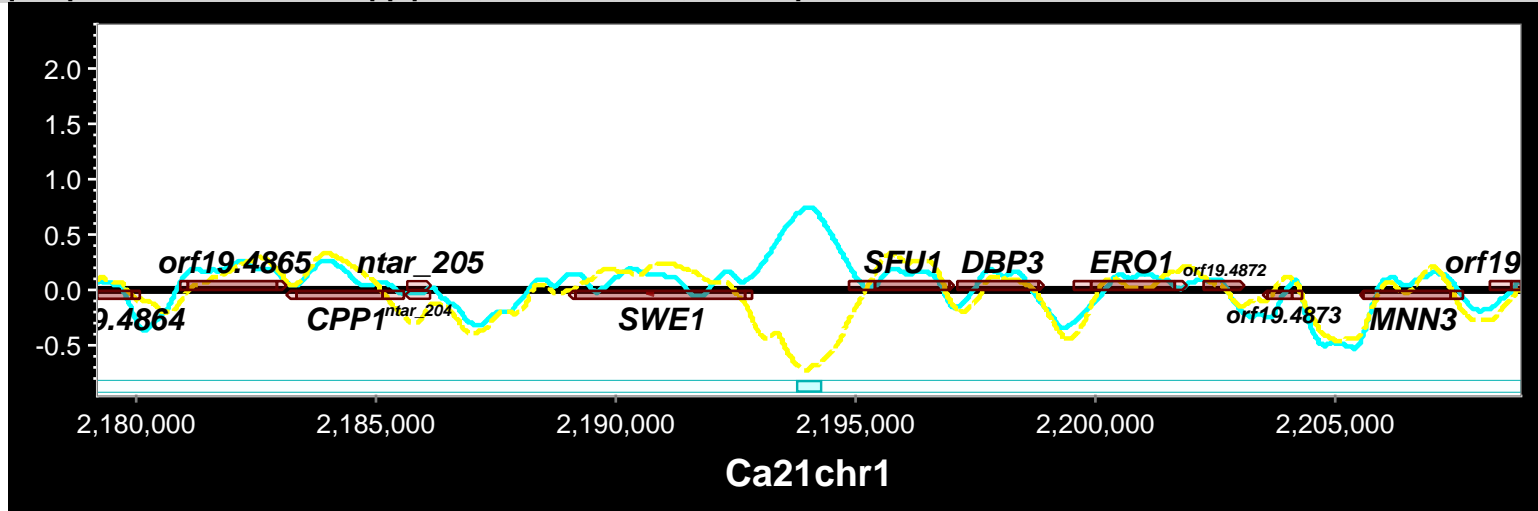

[0.696] Ca21chrR:1359736-1389419 [+] [orf19.721, BCR1, GST3, orf19.719, orf19.725]

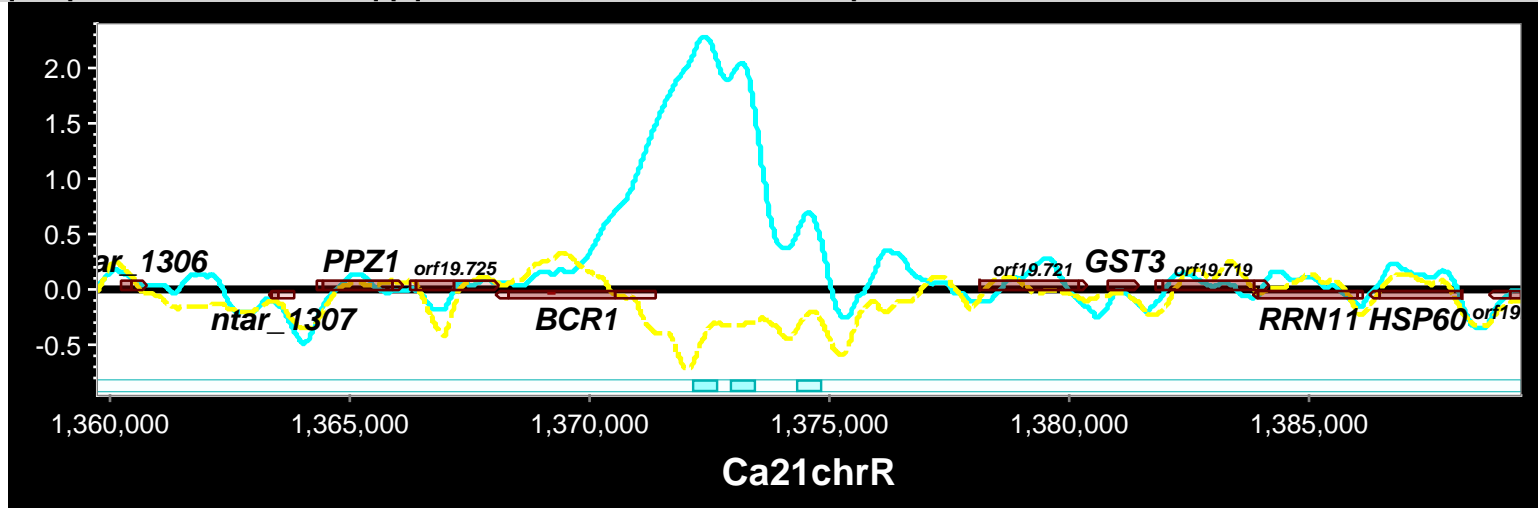

[0.67] Ca21chr7:898745-928428 [+] [orf19.7151, orf19.7152, NRG1, orf19.7153, UTP18]

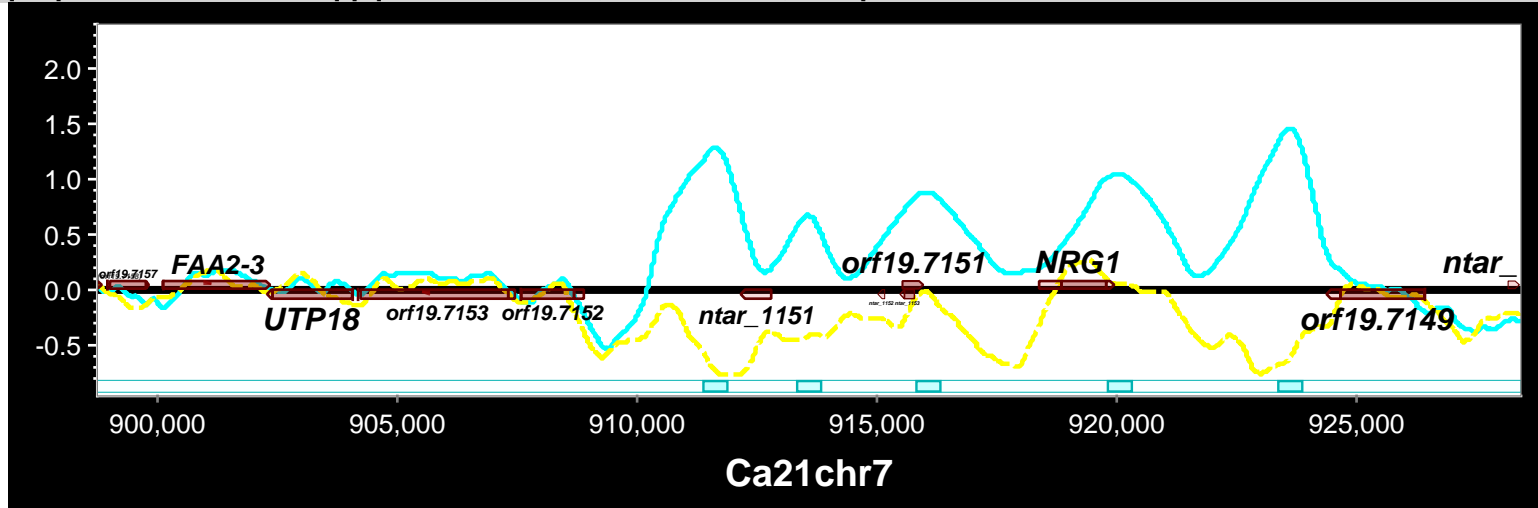

[0.634] Ca21chr1:831538-861221 [+] [orf19.4478, CSH1, orf19.4476, KTR4, orf19.4479]

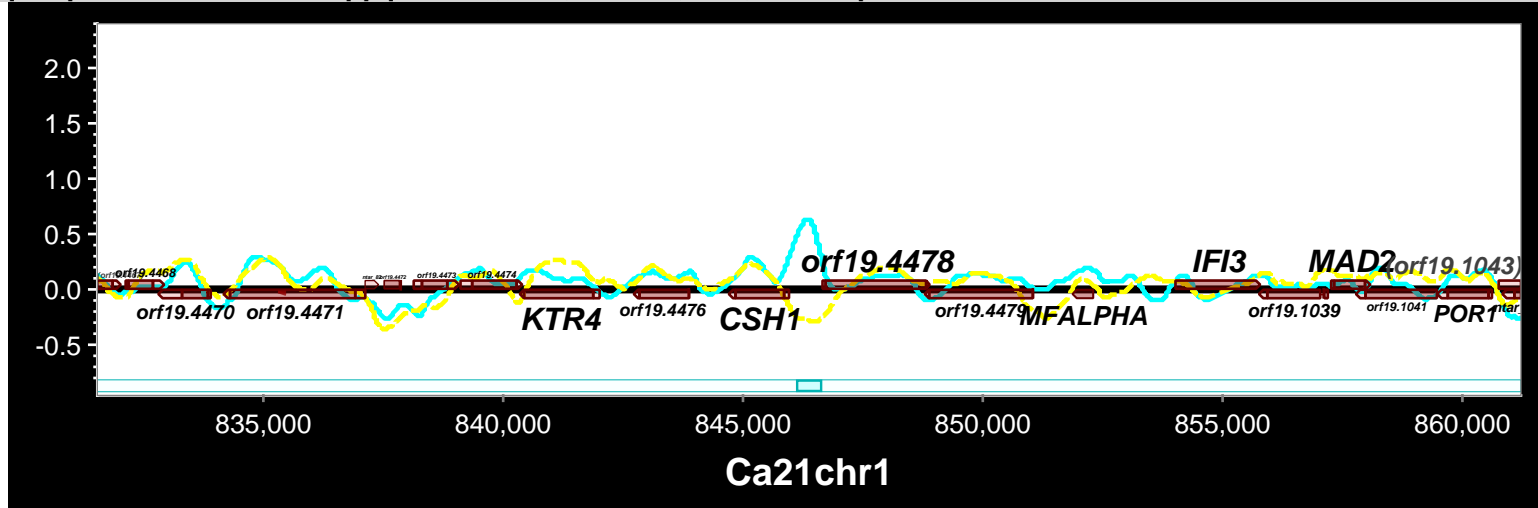



[0.611] Ca21chrR:1521070-1550753 [+] [ALS3, orf19.1815, orf19.1814, CRZ2, FLC2]

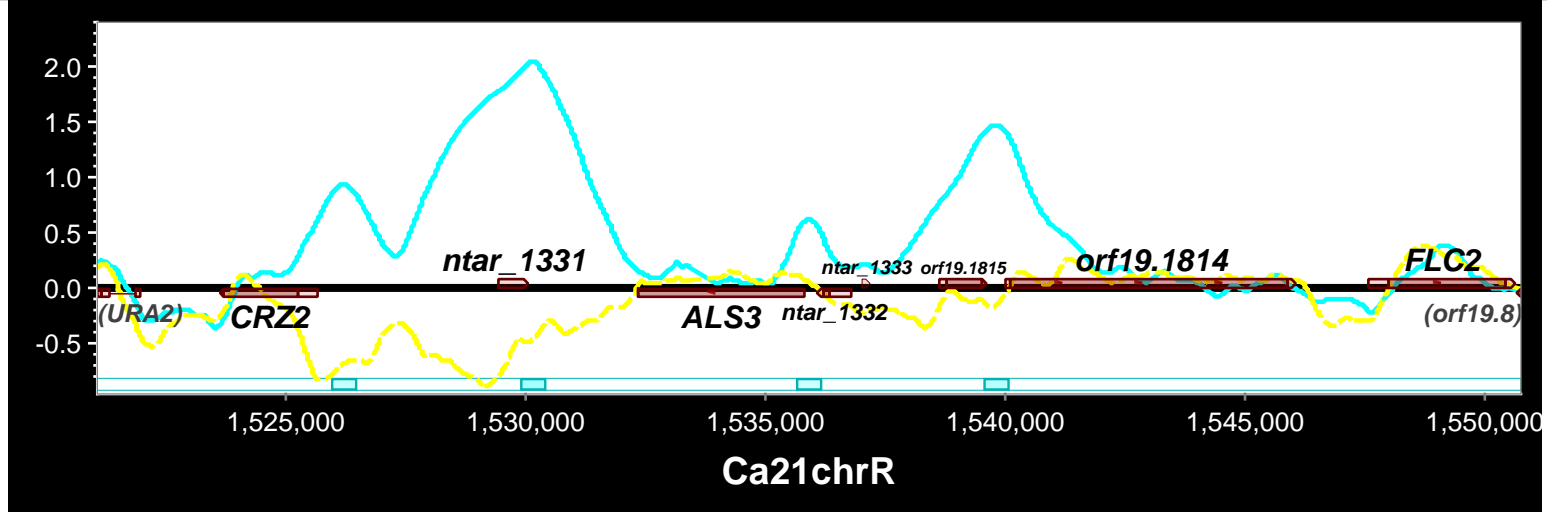

[0.591] Ca21chr1:521283-550966 [+] [tR(UCU)4, orf19.2943.5, DIP5, PUT4, HNM4]

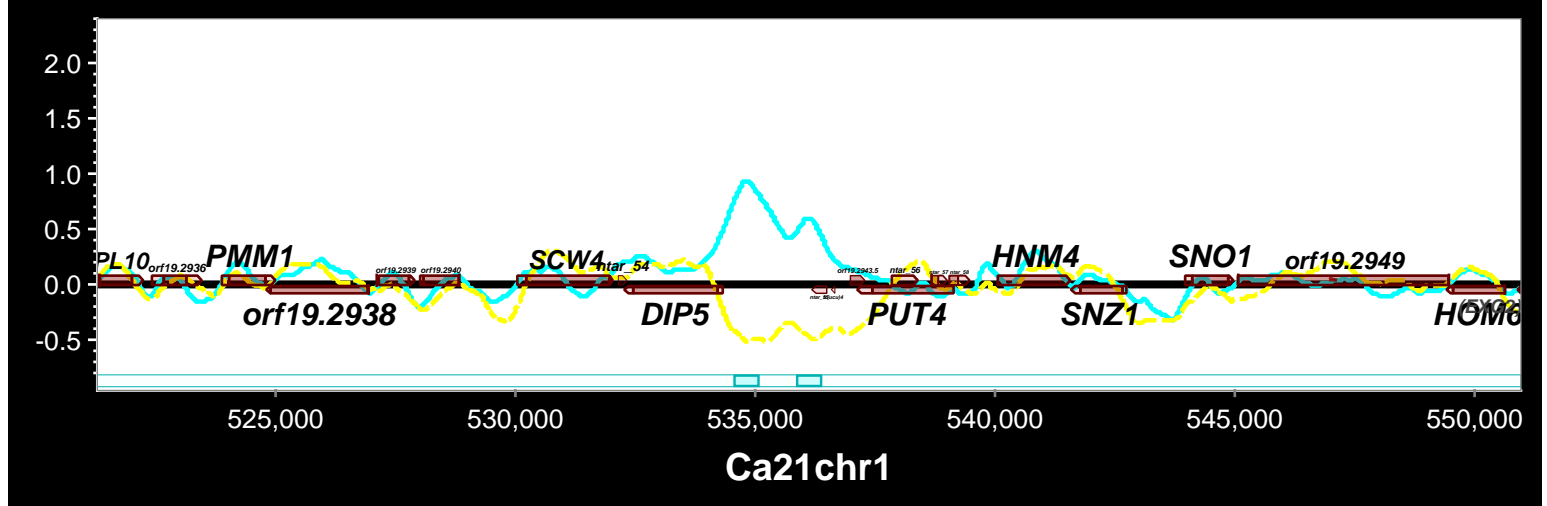

## **Chromatin immunoprecipitation (ChIP) mapping of genomic Efg1 binding sites**

Efg1 Myc-tagged strain CJN1781 vs. untagged wild-type strain SN250 immunoprecipitation binding data were performed under biofilm conditions. The X-axis represents ORF chromosomal locations. The Y-axis is the Agilent normalized enrichment value (log<sub>2</sub>) post-smoothing for the binding of Efg1. Efg1-Myc strain (magenta line) and untagged wild-type strain (grey dashed line) ChIP-chip array binding data was mapped and plotted onto the chromosomes containing the ORFs shown using MochiView v.1.45 software. All significant called peaks for Efg1 are indicated by the magenta track under the peak (see Supplemental Dataset 2 for exact locations and enrichment values). Peak-finding significance thresholds of  $P \leq 0.001$  were used followed by a user-defined cut-off for the minimum value for peak inclusion post-smoothing set to 0.58 (see MochiView manual for details). Genes plotted above the bold line read in the sense direction; genes plotted below the bold line read in the antisense direction.

[3.066] Ca21chrR:64658-94341 [+] [orf19.7502, orf19.7501, CDA2, PXA1, orf19.7504]

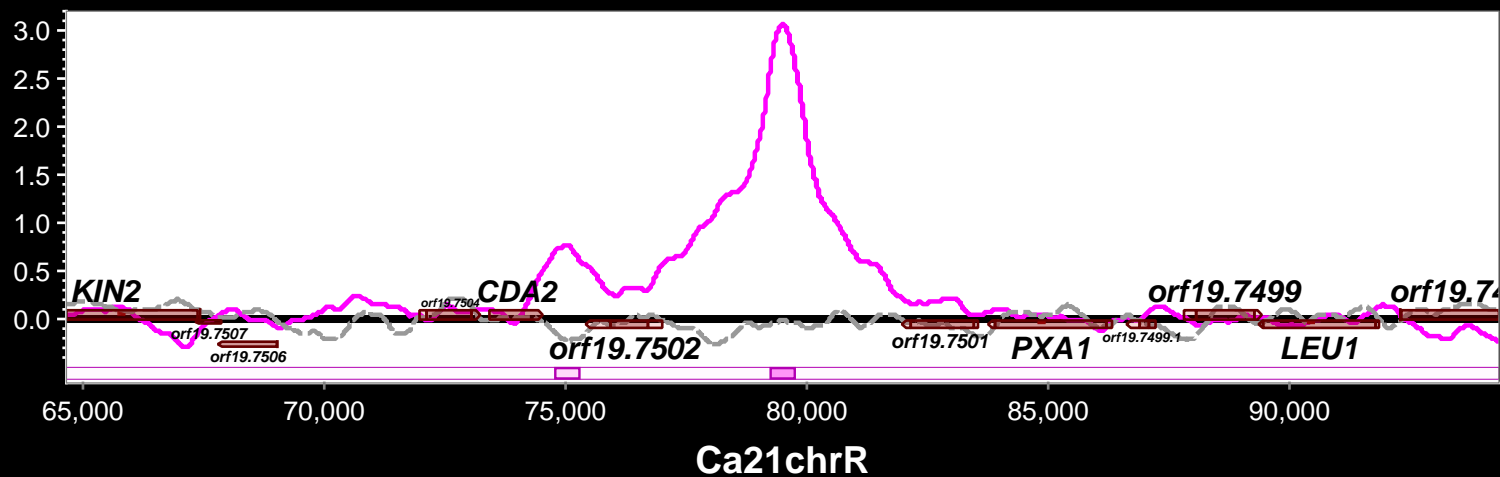

[2.971] Ca21chr7:94957-124640 [+] [orf19.7056, orf19.7054, GAC1, orf19.7057, orf19.7058]

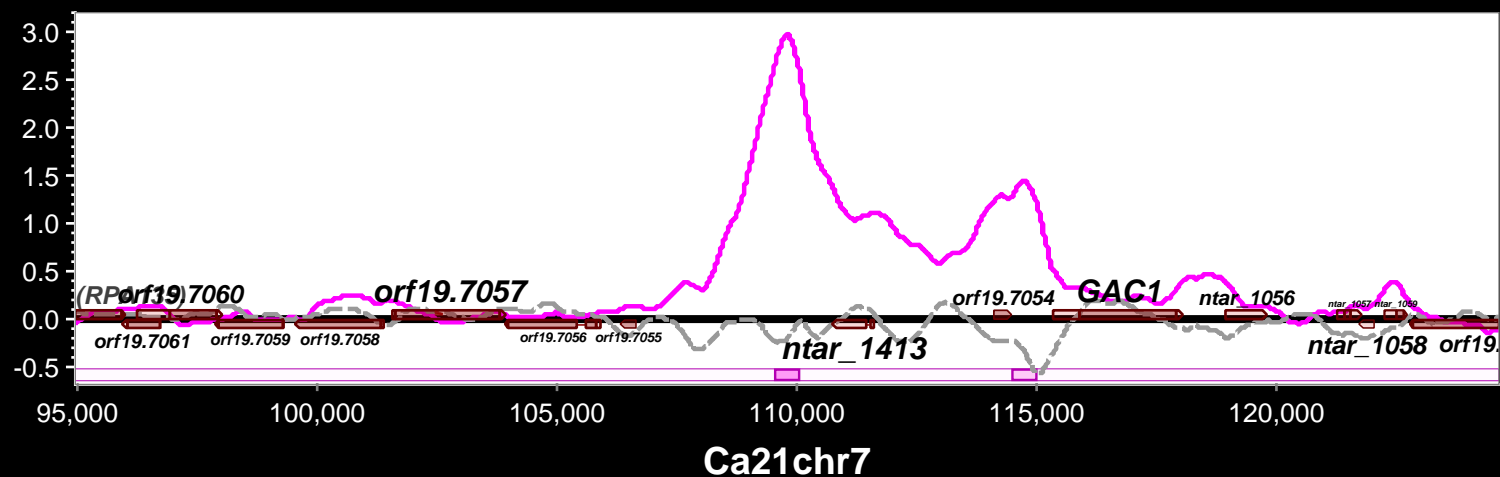

[2.756] Ca21chr3:1460613-1490296 [+] [AAF1, ECM15, th(GUG)3, orf19.7437, GLG2]

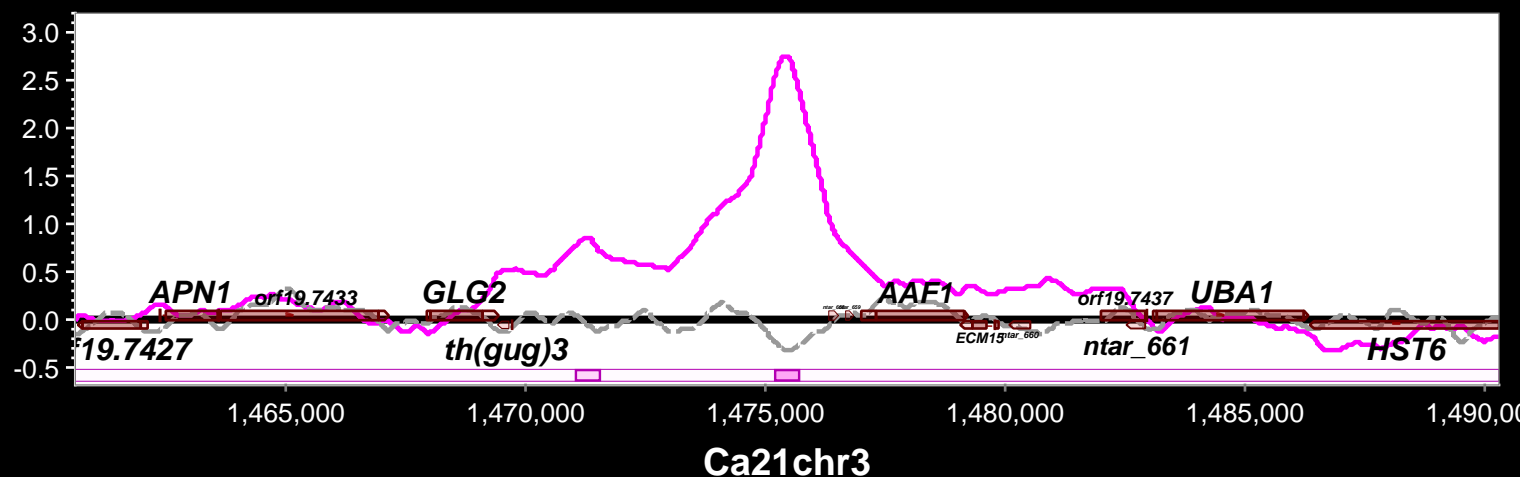

[2.717] Ca21chr3:1713547-1743230 [+] [TCC1, orf19.6732, orf19.6731.1, orf19.6731, orf19.6730]

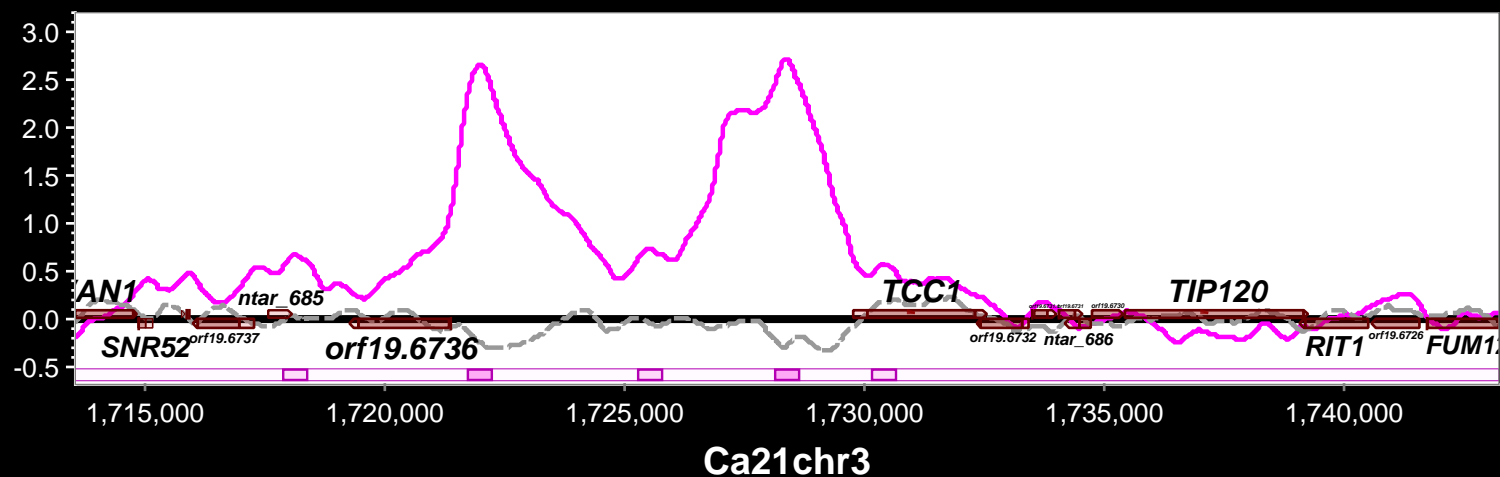

[2.7] Ca21chrR:2154306-2183989 [+] [orf19.7590, FAA4, orf19.7588, orf19.7593]

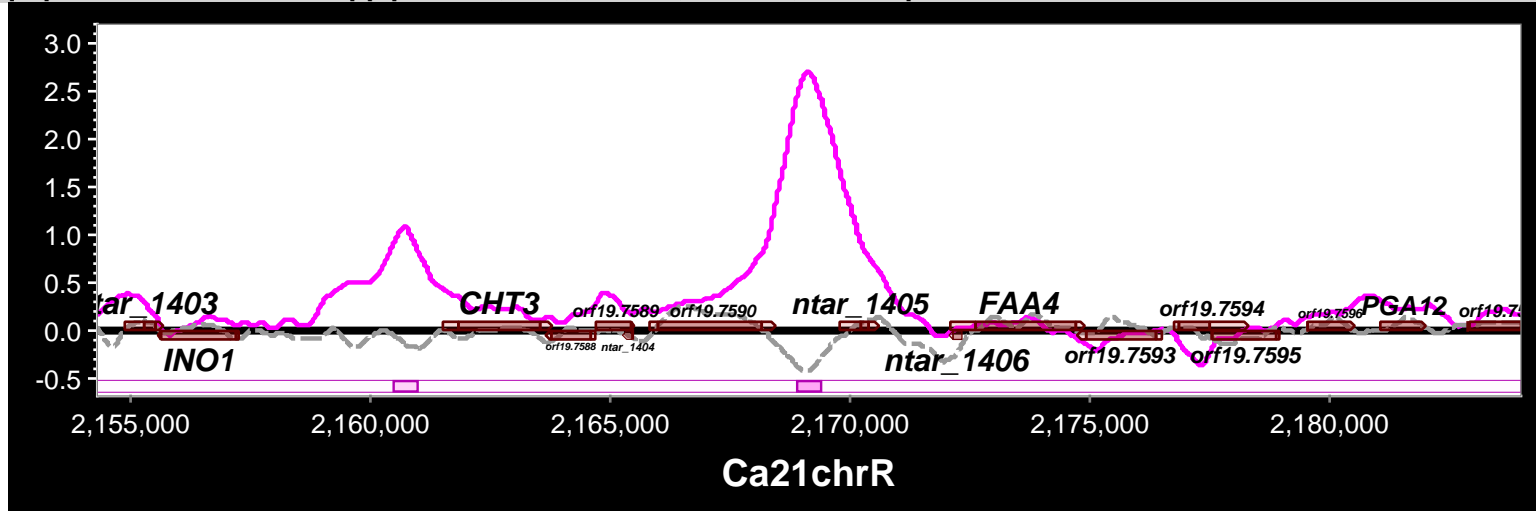

[2.662] Ca21chr3:1707140-1736823 [+] [orf19.6736, orf19.6737, tF(GAA)5, tR(UCU)5, SNR52]

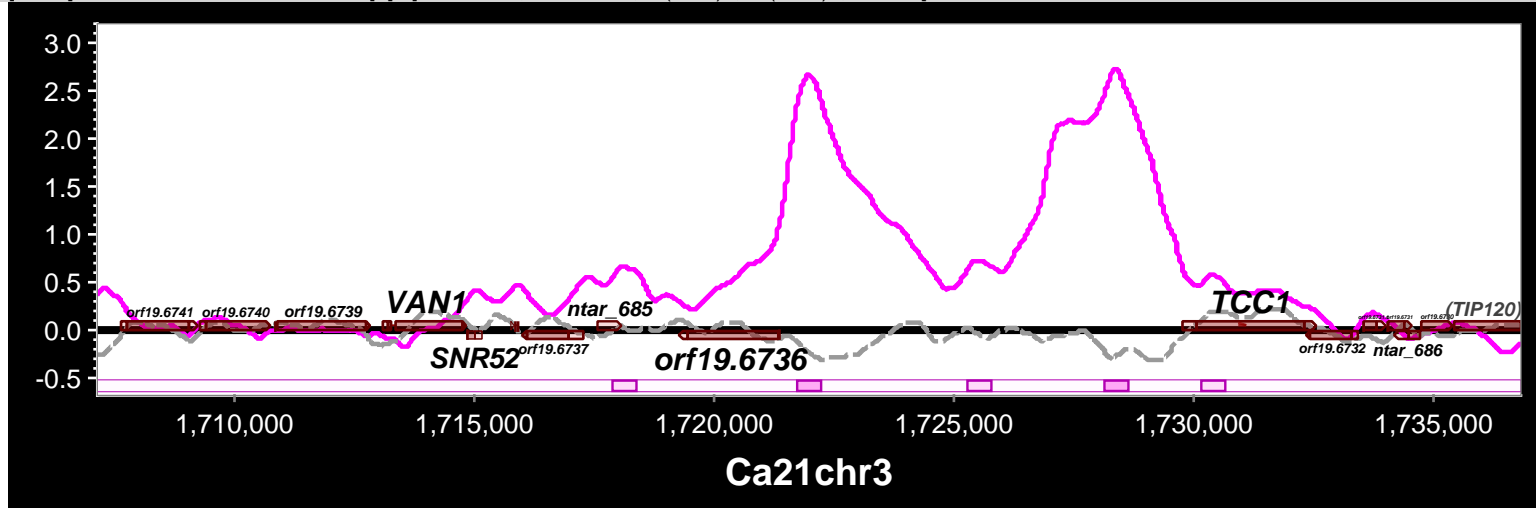

[2.596] Ca21chr1:1076453-1106136 [+] [orf19.449, orf19.448, orf19.450, orf19.446.2, orf19.446.1]

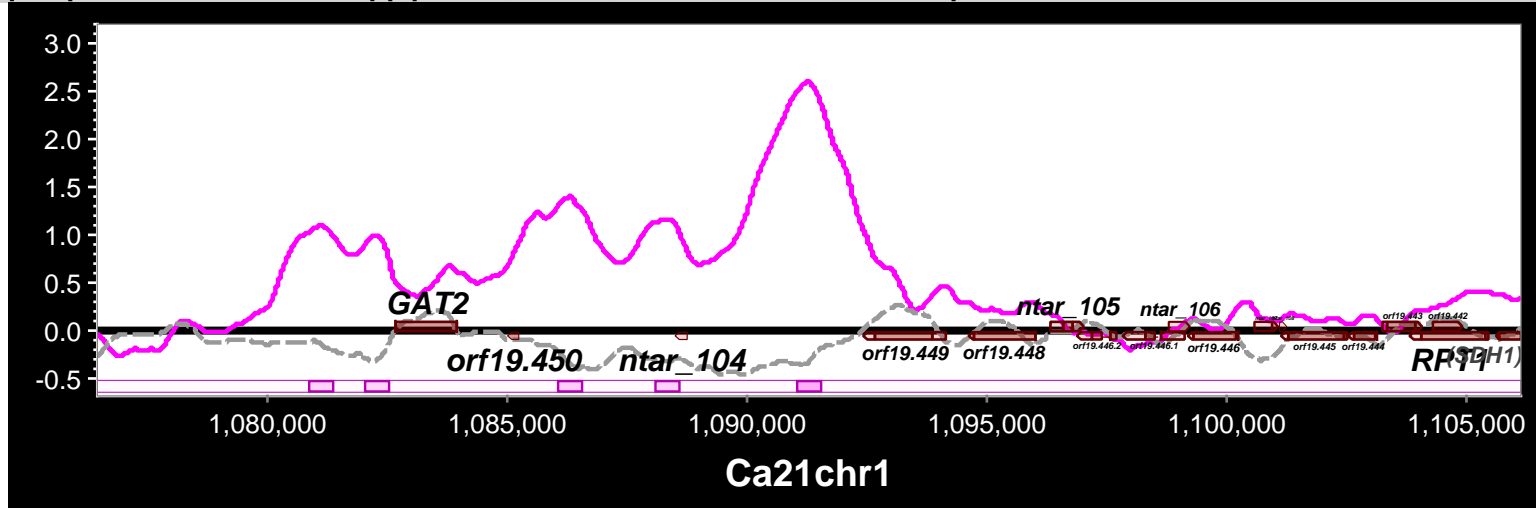

[2.367] Ca21chrR:577734-607417 [+] [orf19.2822, orf19.2821, RFG1, orf19.2820, orf19.2819]

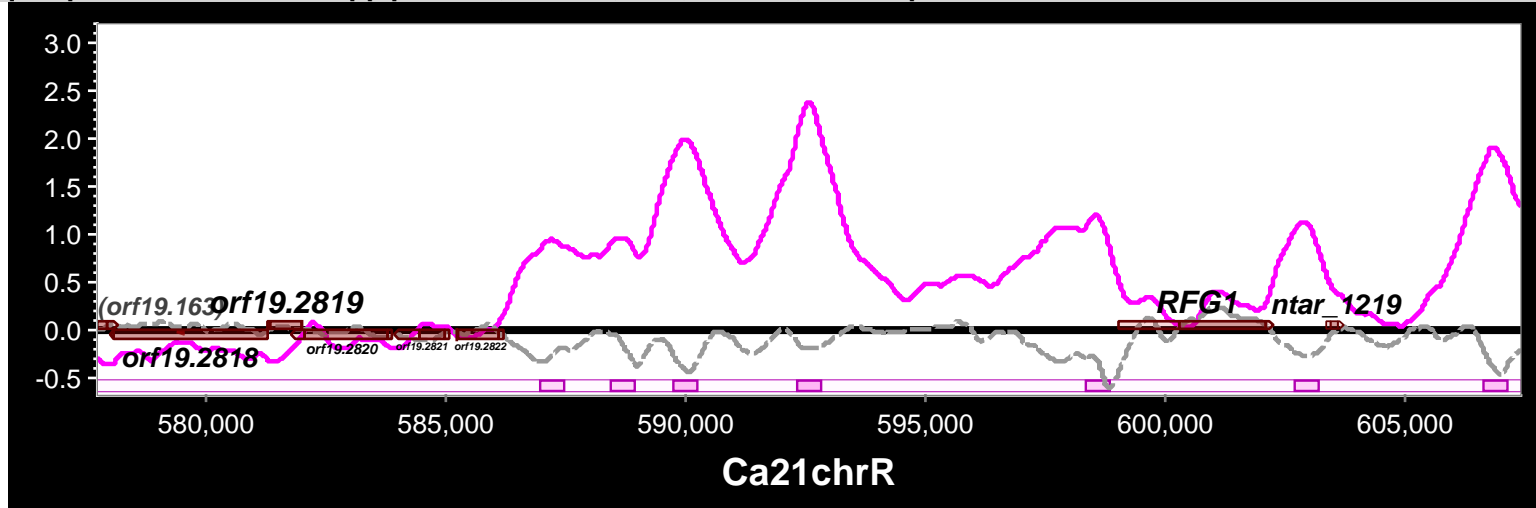

[2.363] Ca21chr7:431379-461062 [+] [CUP9, HSP90, RAD14, orf19.6518, EXO70]

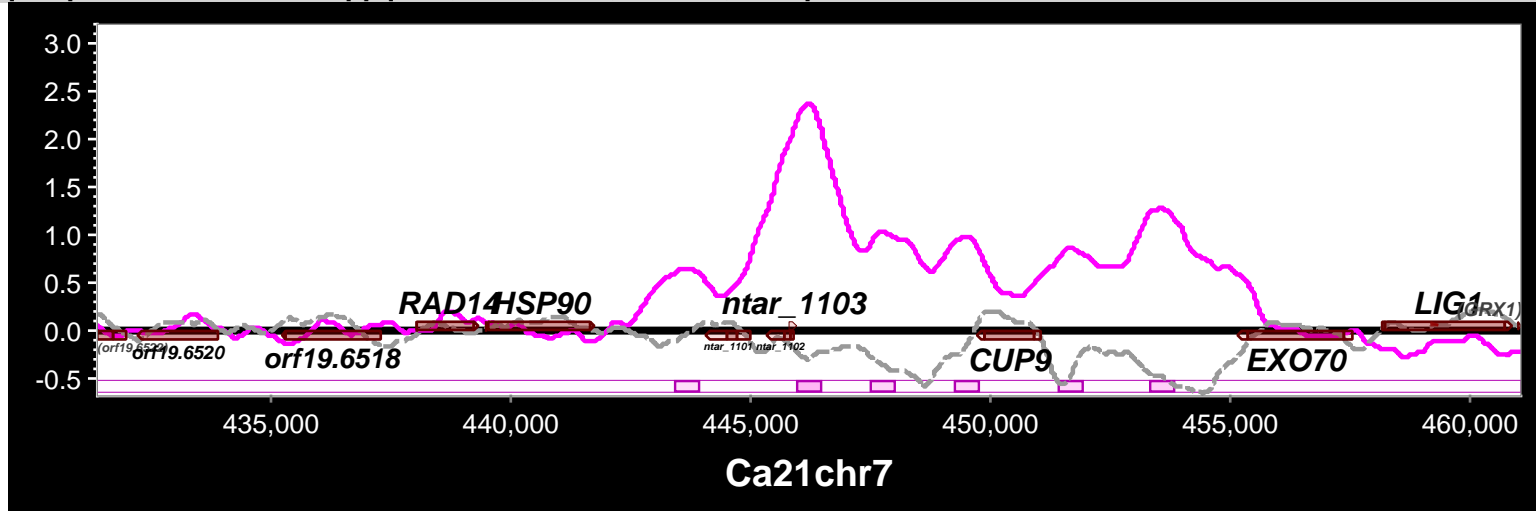

[2.186] Ca21chrR:1706920-1736603 [+] [EFG1, orf19.609, orf19.607, tg(GCC)1, orf19.612]

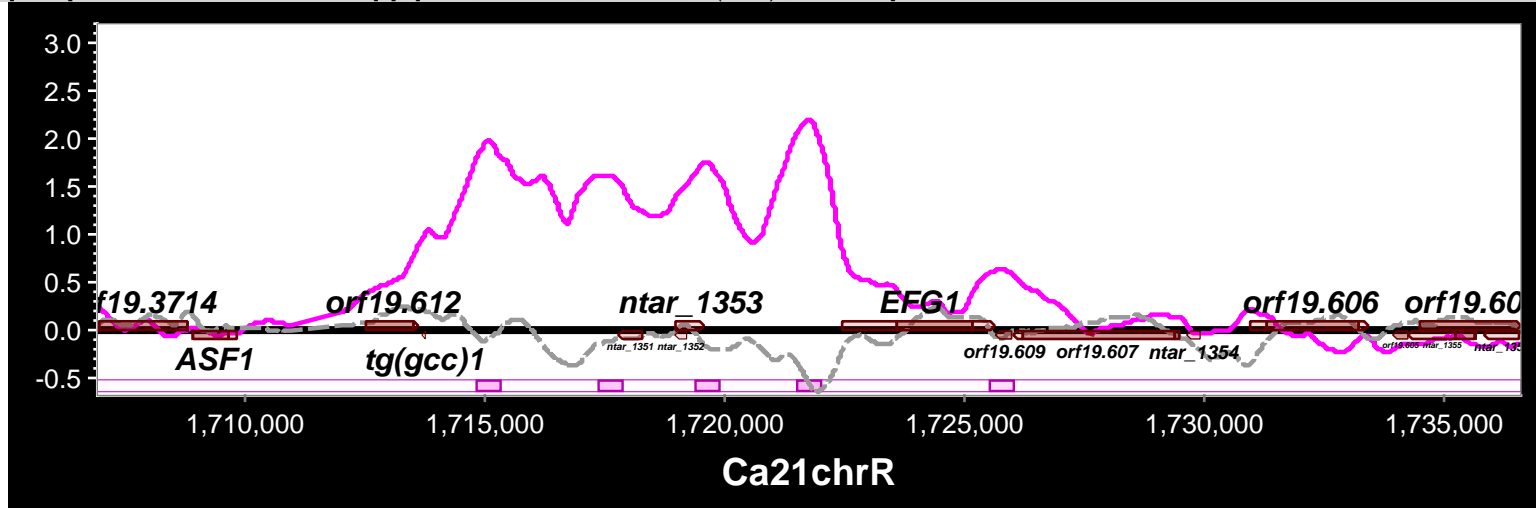

[2.167] Ca21chr2:148979-178662 [+] [HGT7, orf19.2024, orf19.2025, orf19.2026, HGT8]

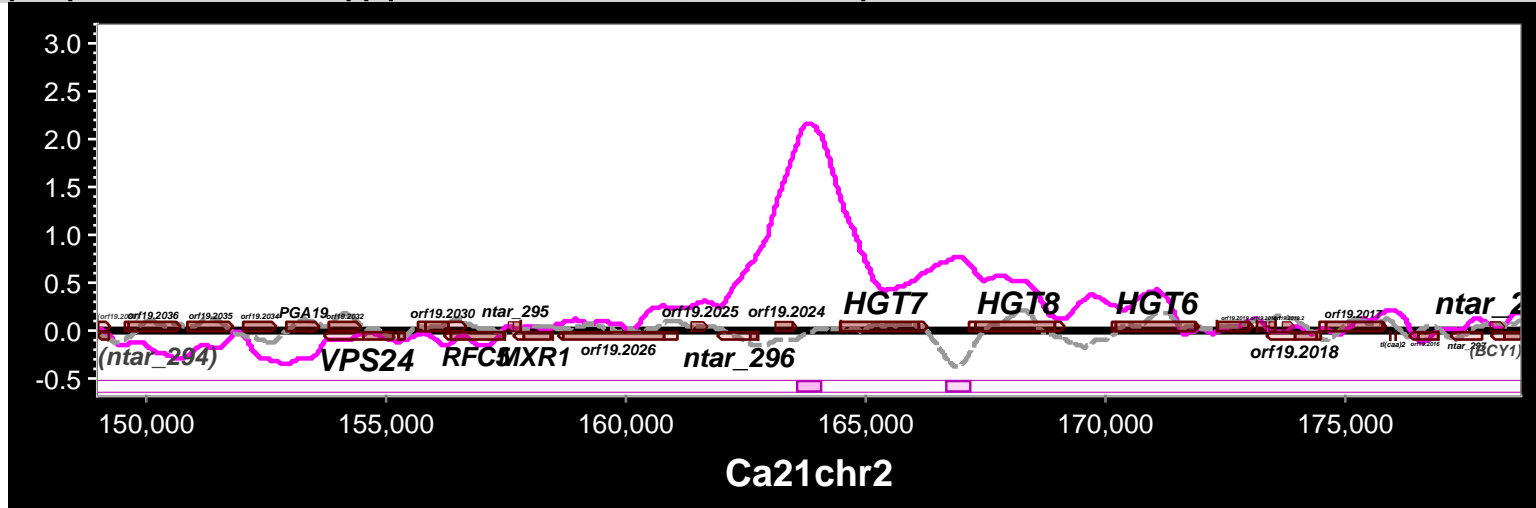

[1.993] Ca21chrR:575153-604836 [+] [orf19.2822, orf19.2821, orf19.2820, orf19.2819, orf19.2818]

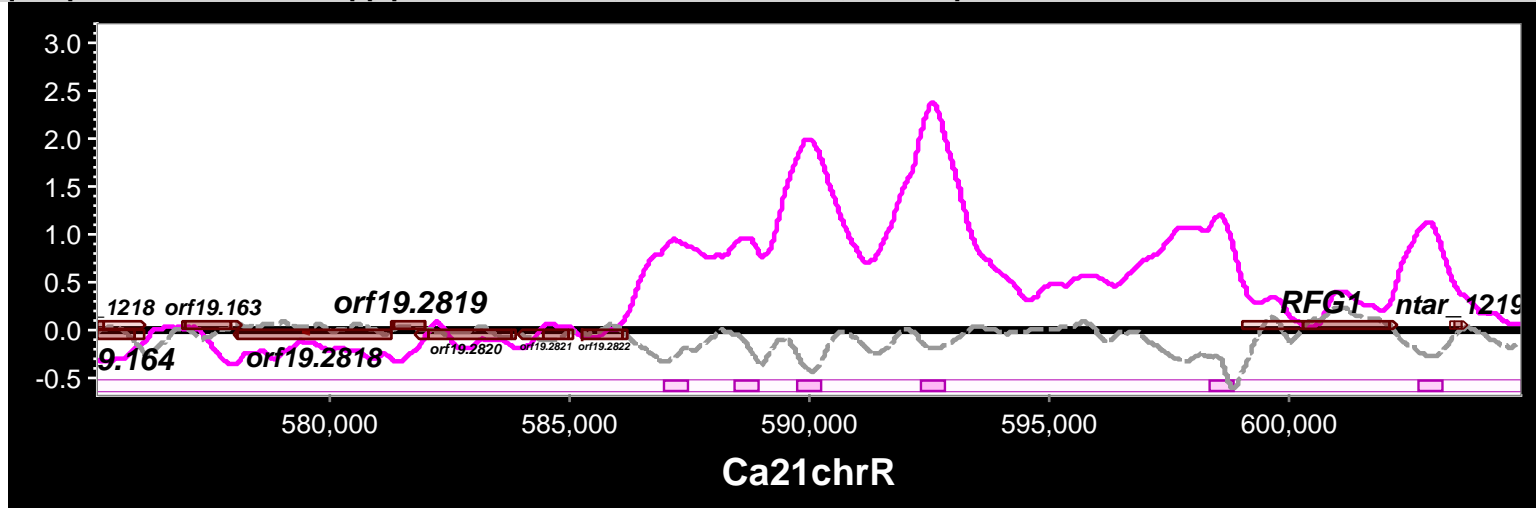

[1.985] Ca21chrR:1700237-1729920 [+] [tg(GCC)1, orf19.612, ASF1, orf19.3714, EFG1]

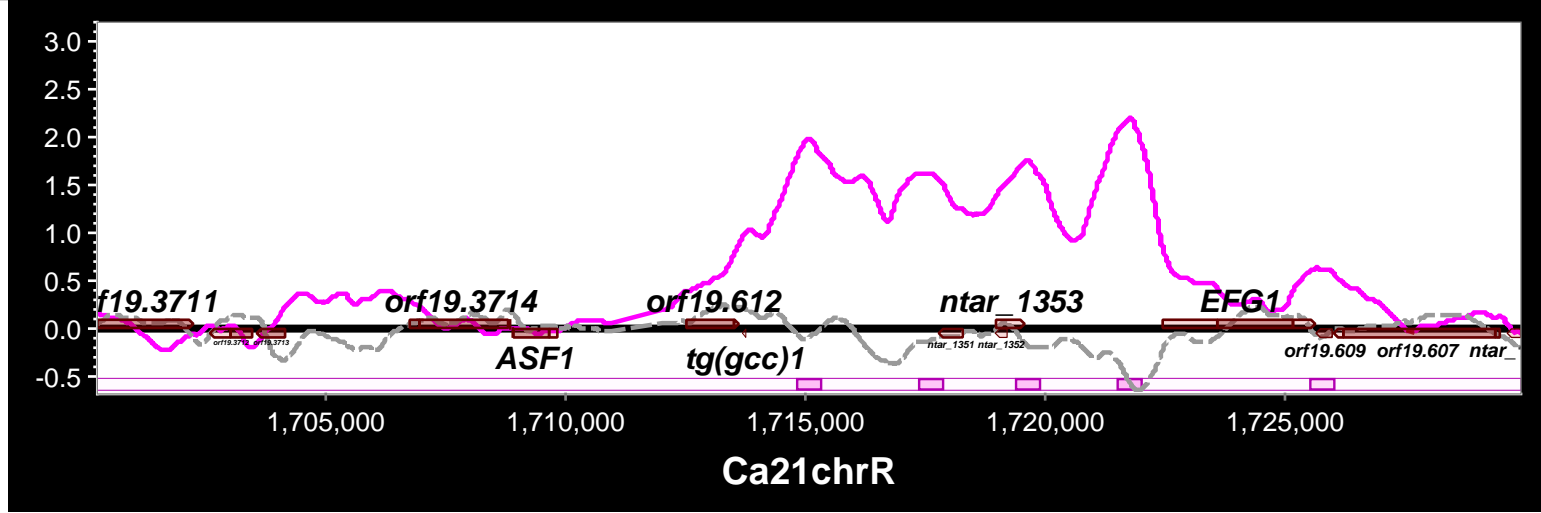

[1.979] Ca21chr4:1508052-1537735 [+] [CZF1, orf19.3128, CCT6, orf19.3125, orf19.3129]

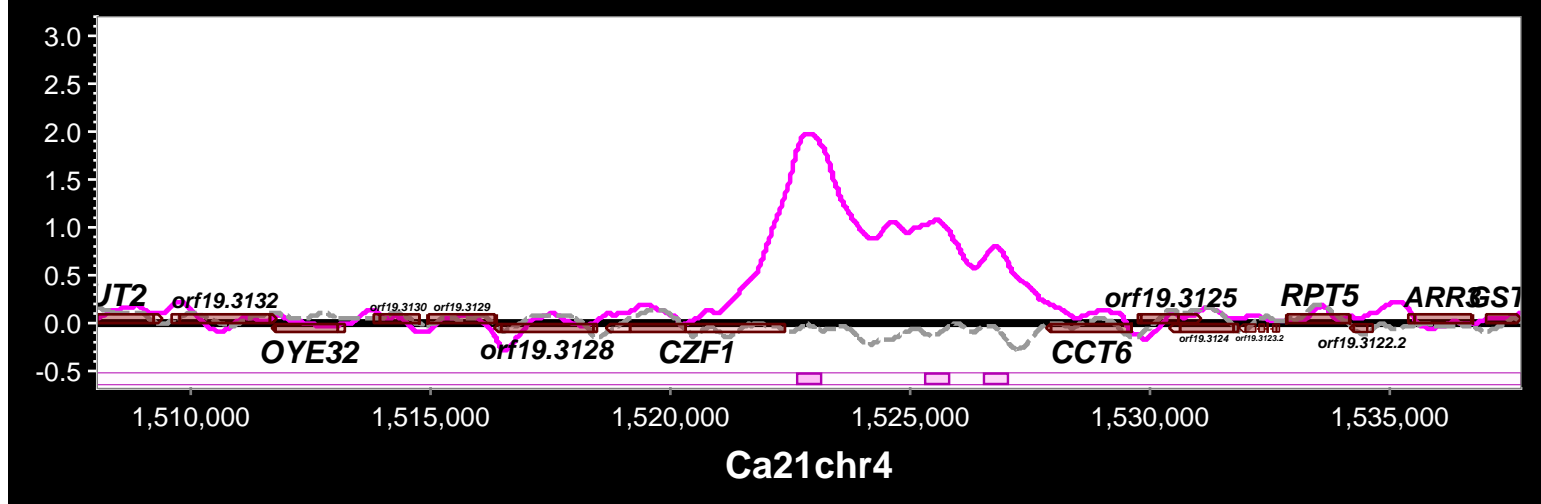

[1.92] Ca21chr3:1110465-1140148 [+] [RHB1, MCA1, RPS19A, WOR2, DYN1]

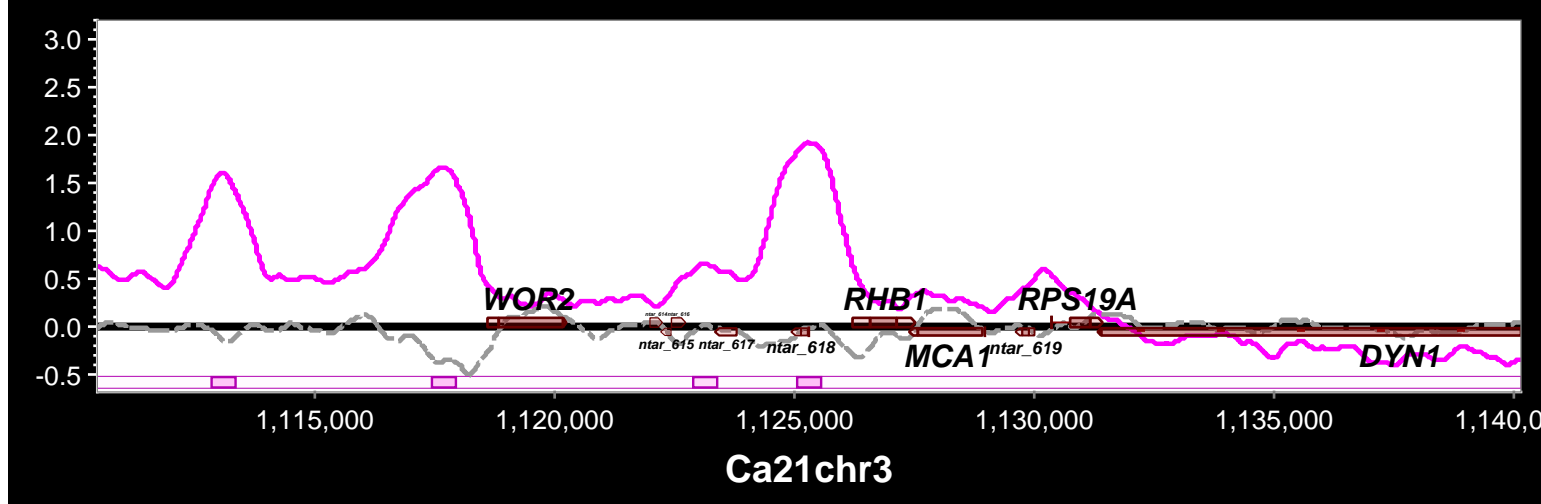

[1.917] Ca21chrR:592044-621727 [+] [orf19.2825, RFG1, orf19.2826, orf19.2827, orf19.2828]

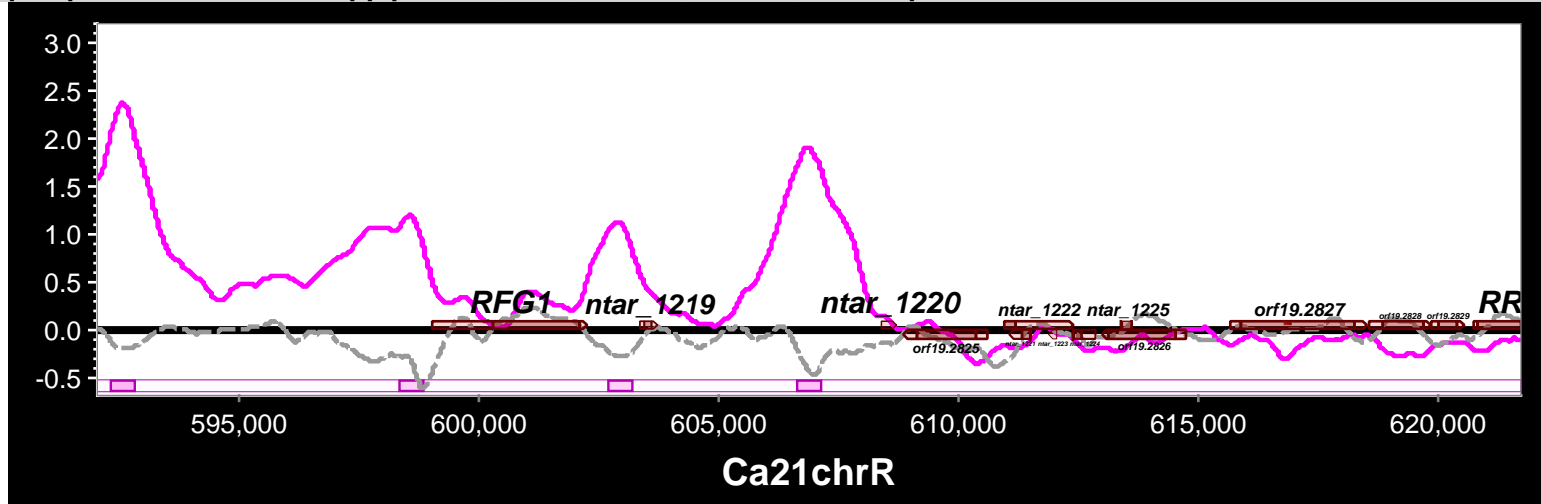

[1.8] Ca21chr3:841436-871119 [+] [SBP1, orf19.913.2, orf19.5854.1, CDR11, MBP1]

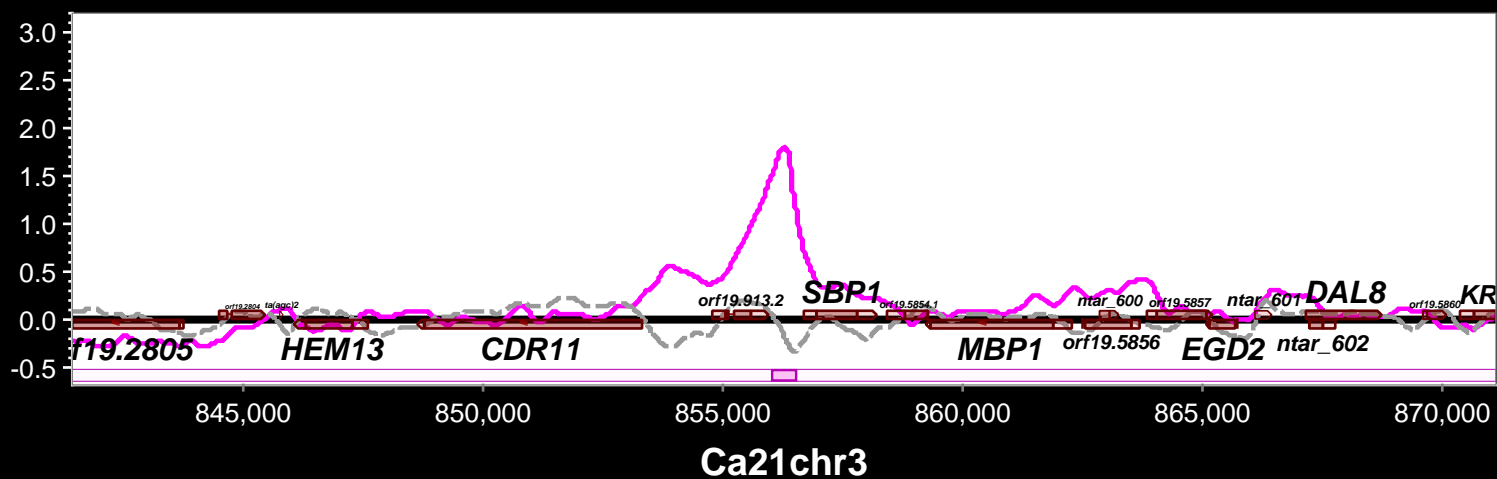

[1.785] Ca21chrR:1511243-1540926 [+] [CRZ2, URA2, ALS3, orf19.1815, SPT10]

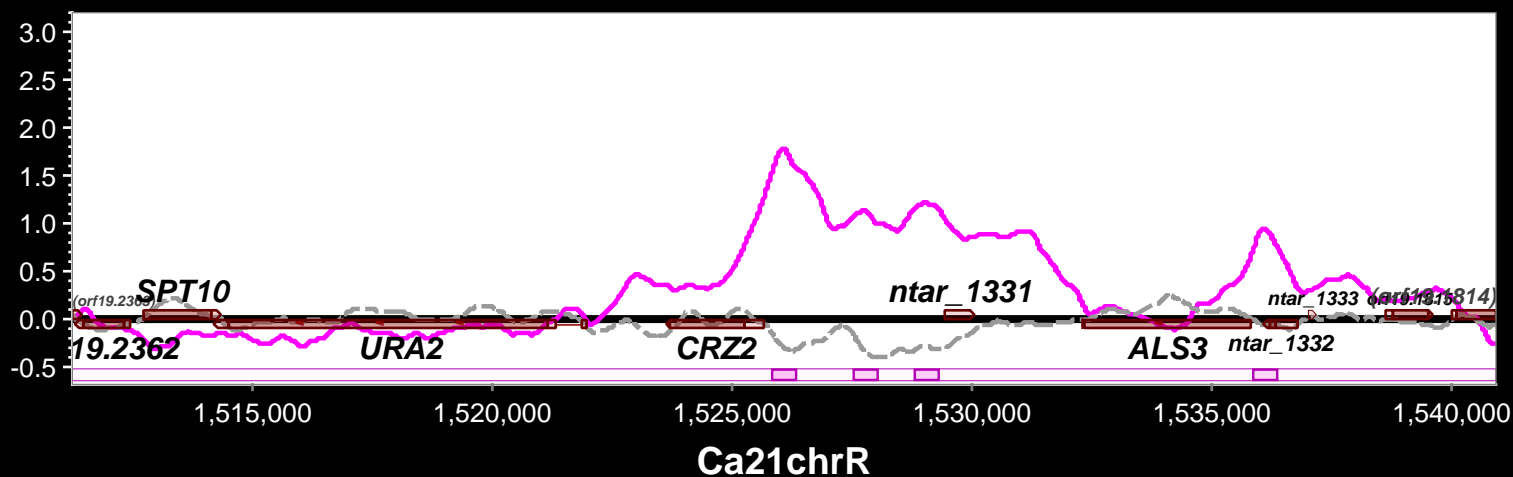

[1.752] Ca21chrR:1704801-1734484 [+] [EFG1, tg(GCC)1, orf19.609, orf19.612, orf19.607]

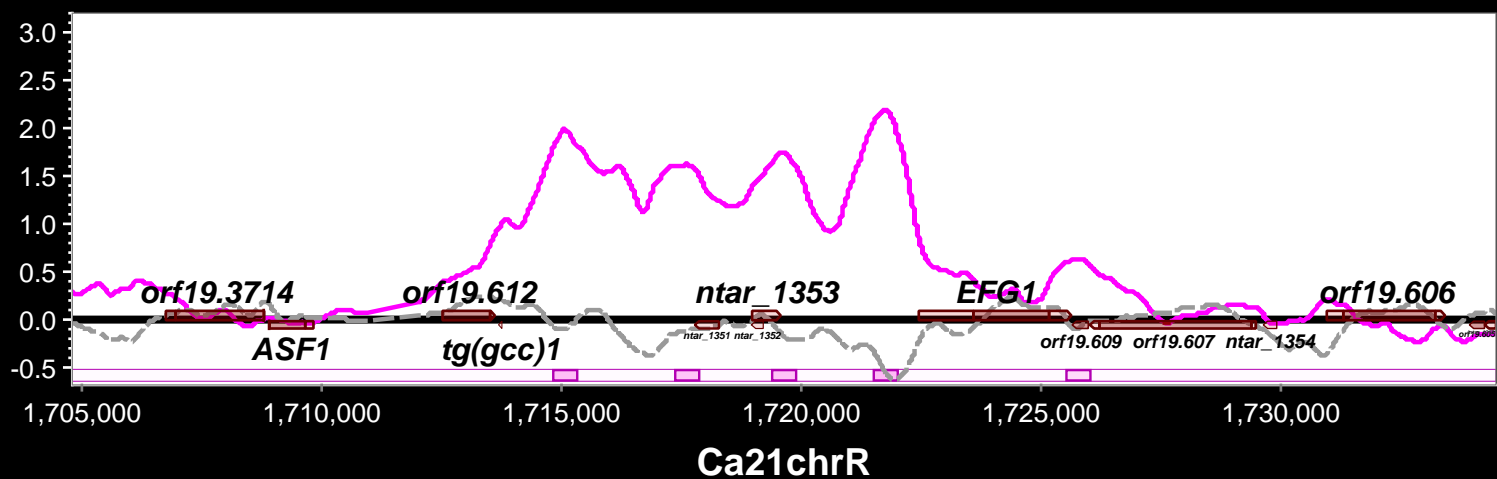

[1.75] Ca21chr2:730483-760166 [+] [orf19.867, ADAEC, RAD32, orf19.864, orf19.863]

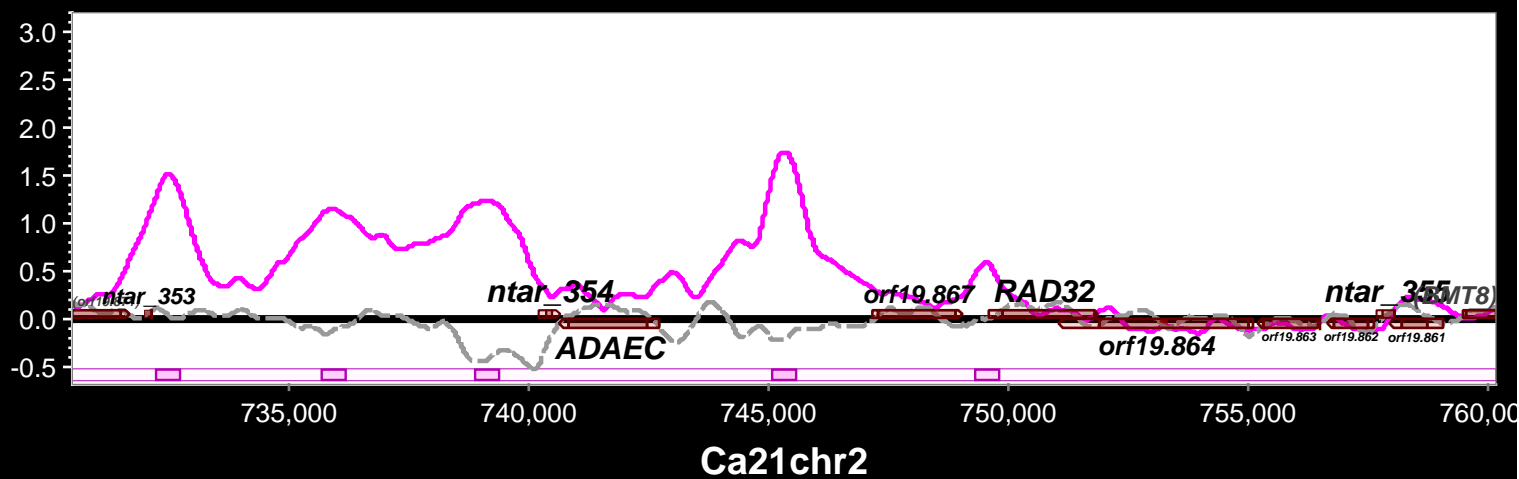

[1.689] Ca21chr1:2896256-2925939 [+] [STP2, orf19.4960, orf19.4962, orf19.4963, orf19.4959]

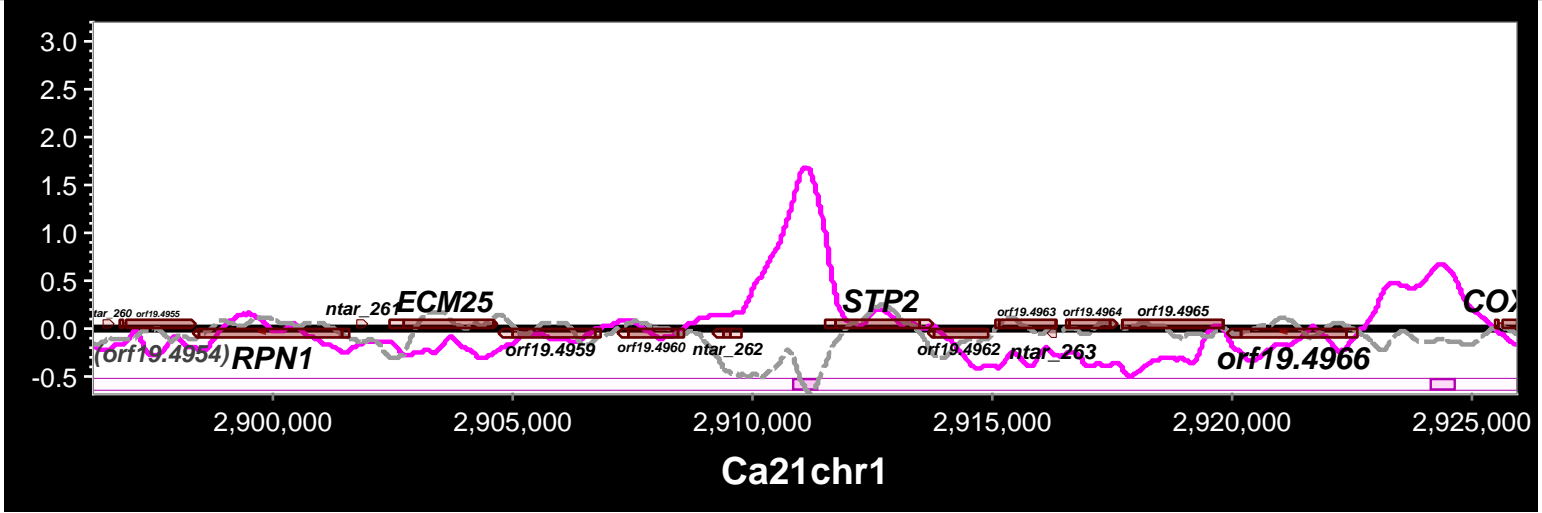

[1.686] Ca21chr4:1489872-1519555 [+] [orf19.3134, orf19.3135, GUT2, orf19.3136, orf19.3132]

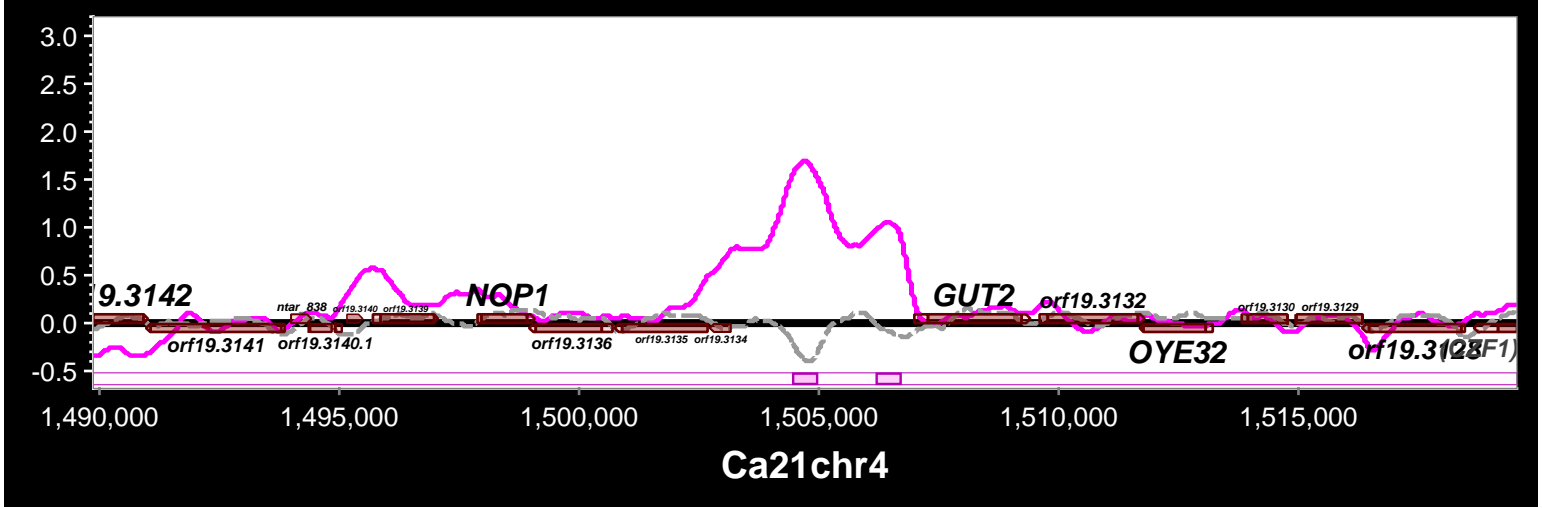

[1.677] Ca21chr3:938965-968648 [+] [TEC1, orf19.5910, CMK1, ADE2, MAK21]

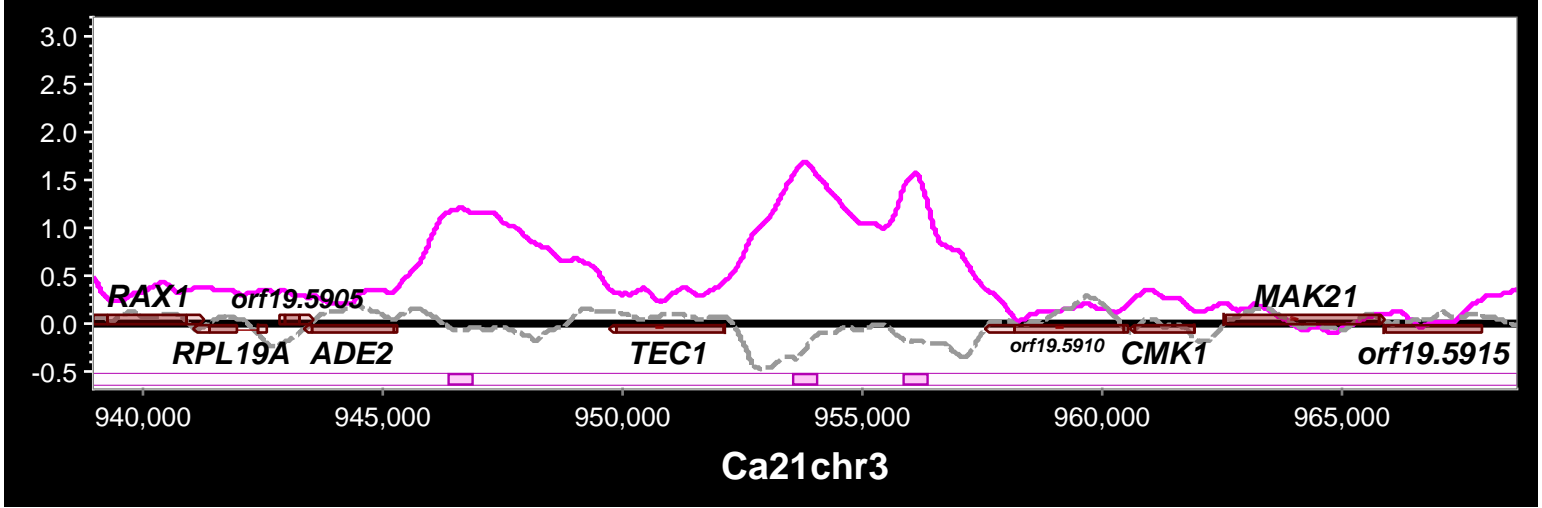

[1.671] Ca21chr3:1102850-1132533 [+] [WOR2, RHB1, orf19.5991, MCA1, RPS19A]

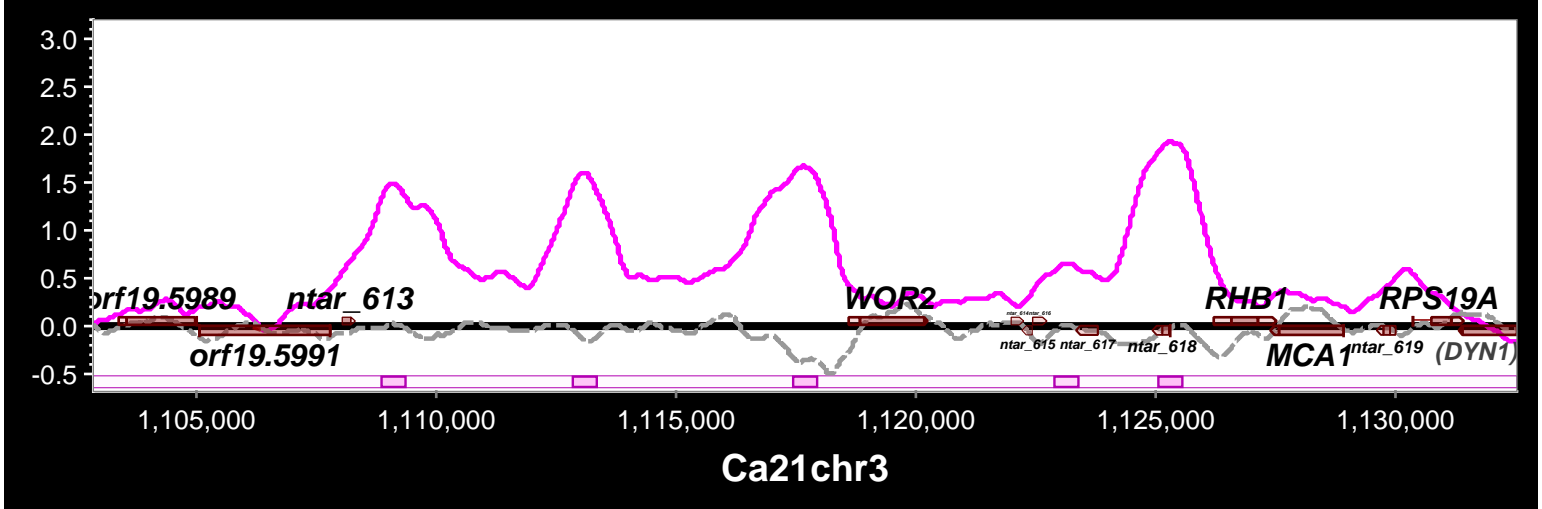



[1.664] Ca21chrR:1300527-1330210 [+] [orf19.3868, orf19.3869, ADE13, orf19.3871, orf19.3872]

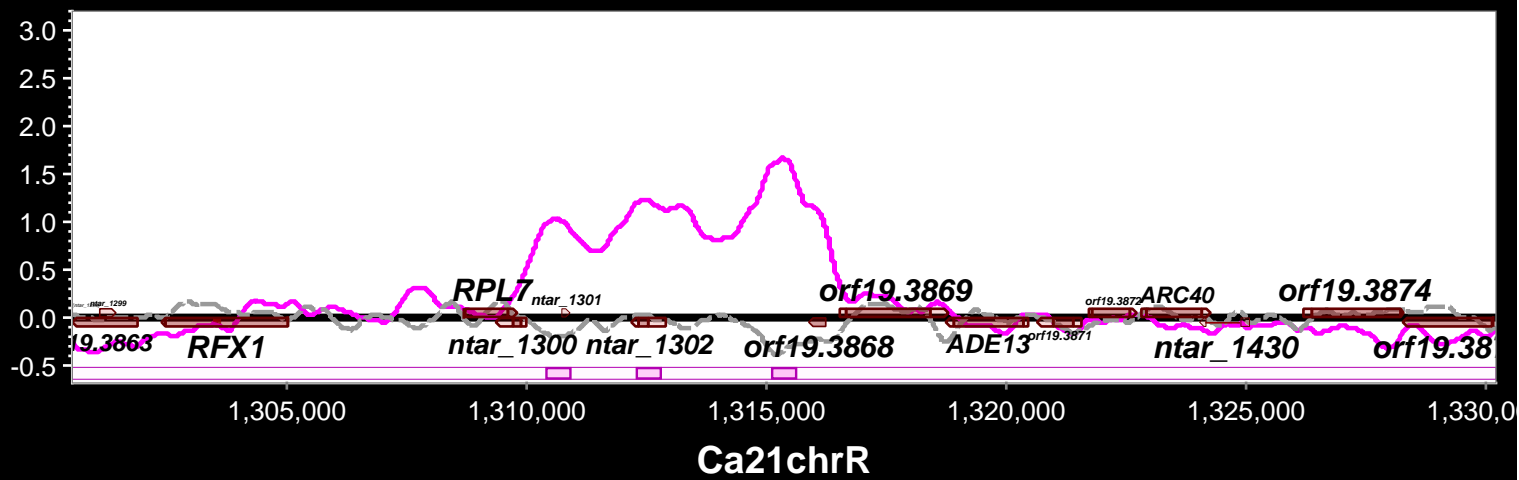

[1.658] Ca21chr4:701295-730978 [+] [MOH1, orf19.3368, orf19.3367, orf19.3366.1, DOT4]

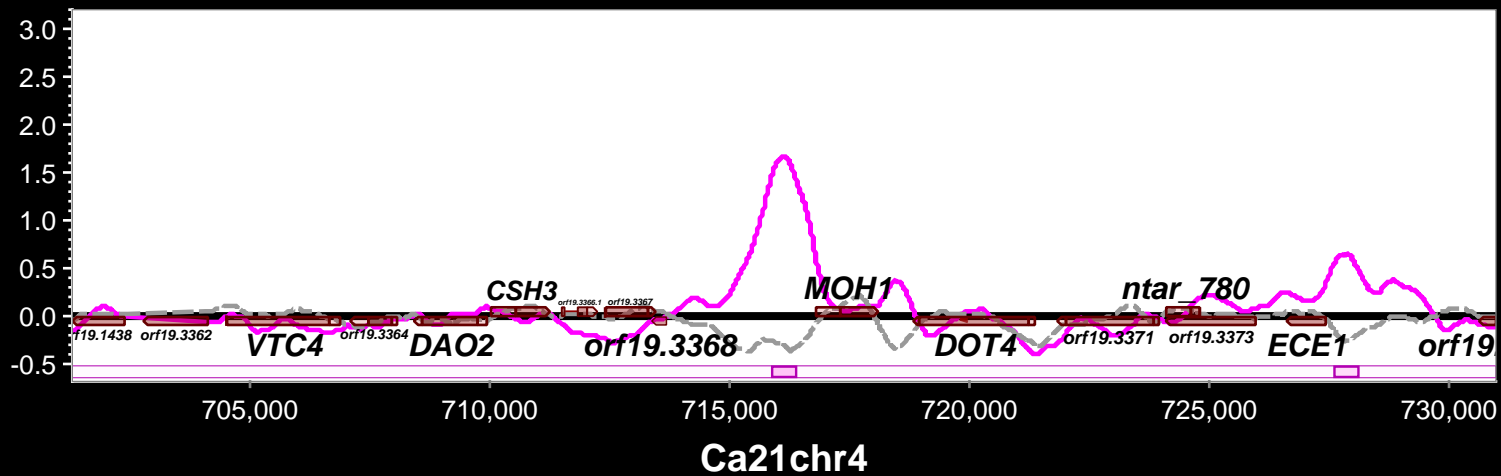

[1.628] Ca21chr6:113979-143662 [+] [FAT1, COX15, PGK1, orf19.3649, orf19.3658]

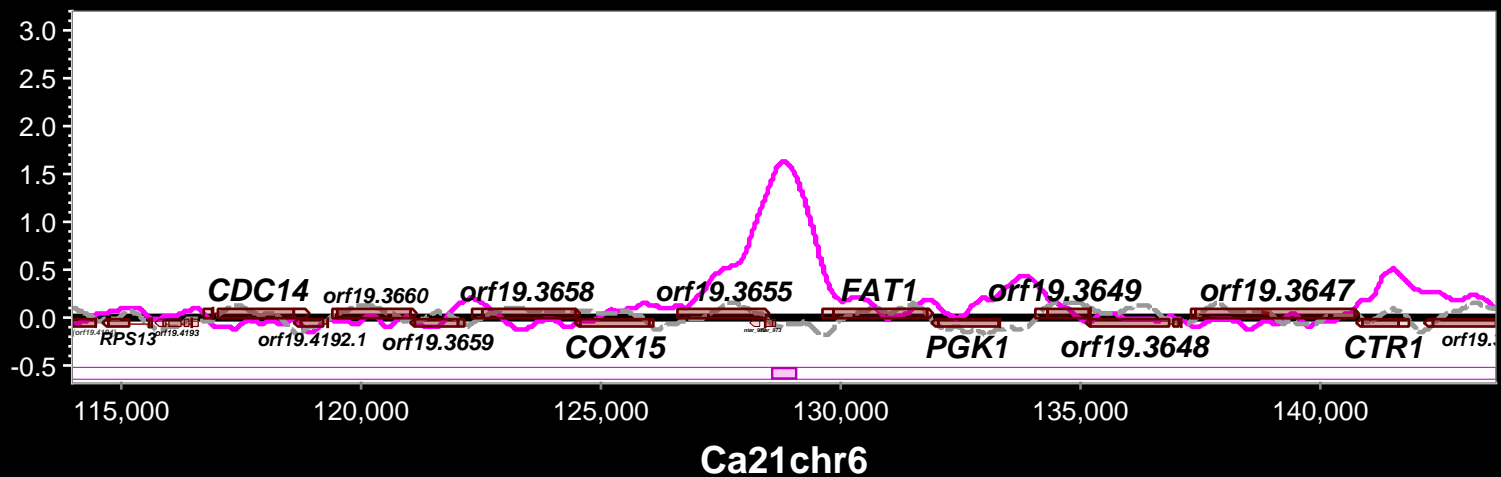

[1.62] Ca21chrR:1702780-1732463 [+] [tg(GCC)1, orf19.612, EFG1, ASF1, orf19.609]

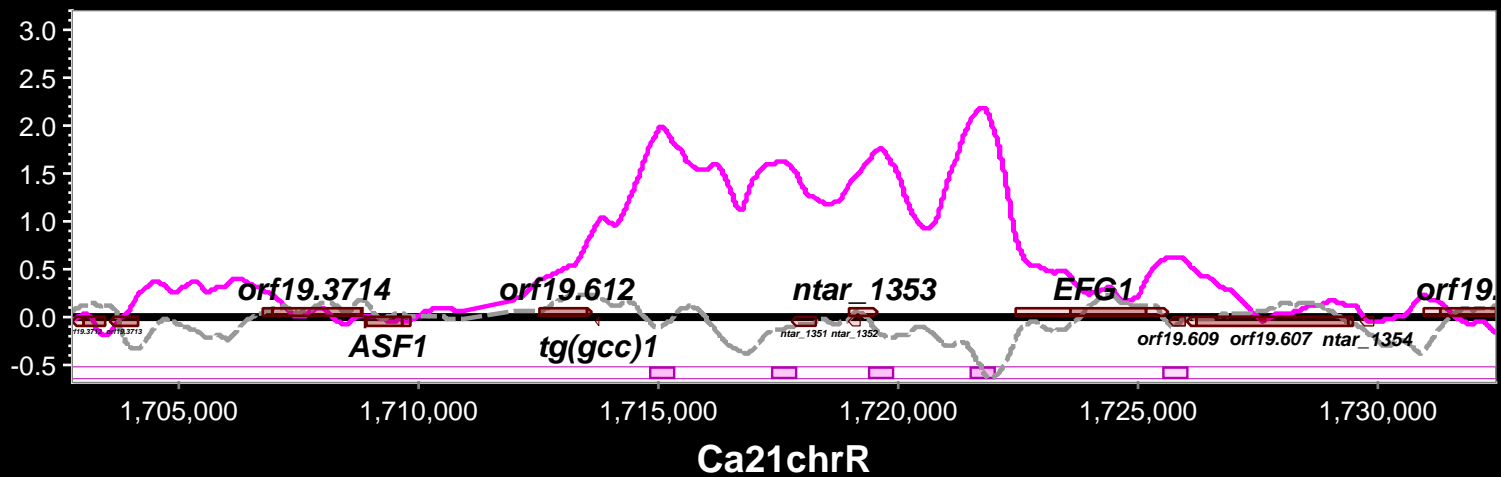

[1.608] Ca21chr3:1098256-1127939 [+] [orf19.5991, WOR2, orf19.5989, orf19.5987, THI4]

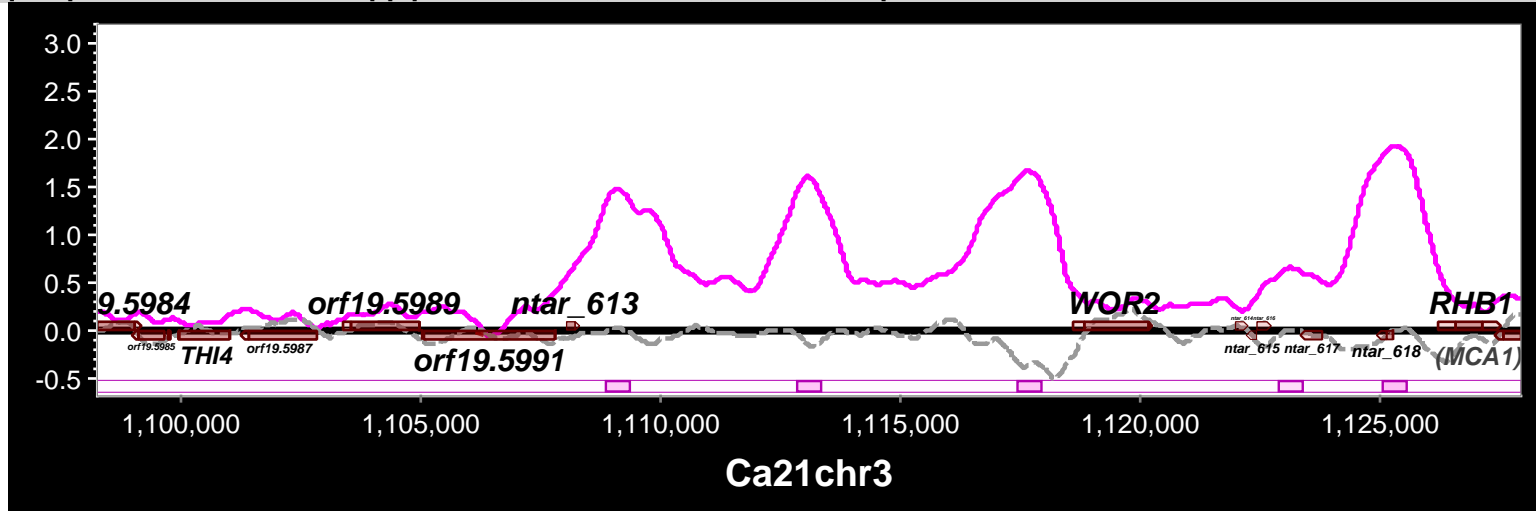

[1.606] Ca21chr4:1085422-1115105 [+] [HAP41, MYO5, orf19.741, ALD6, orf19.736]

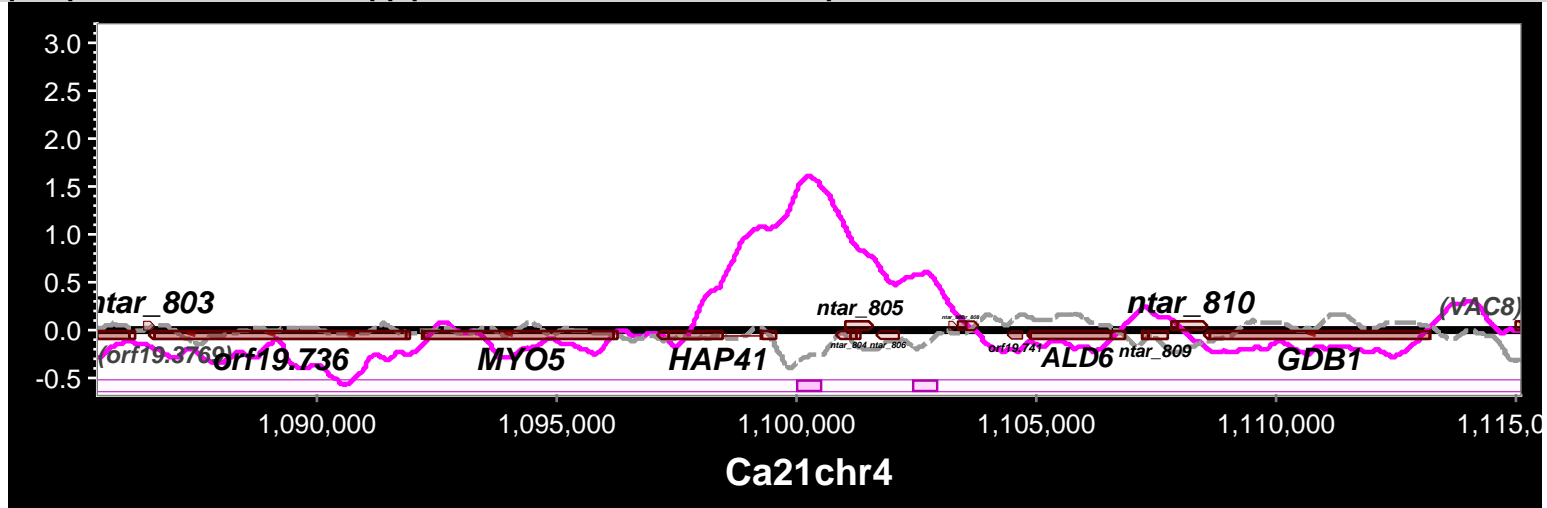

[1.58] Ca21chr1:279158-308841 [+] [orf19.3335, RPS21, orf19.3337, orf19.3333, orf19.3338]

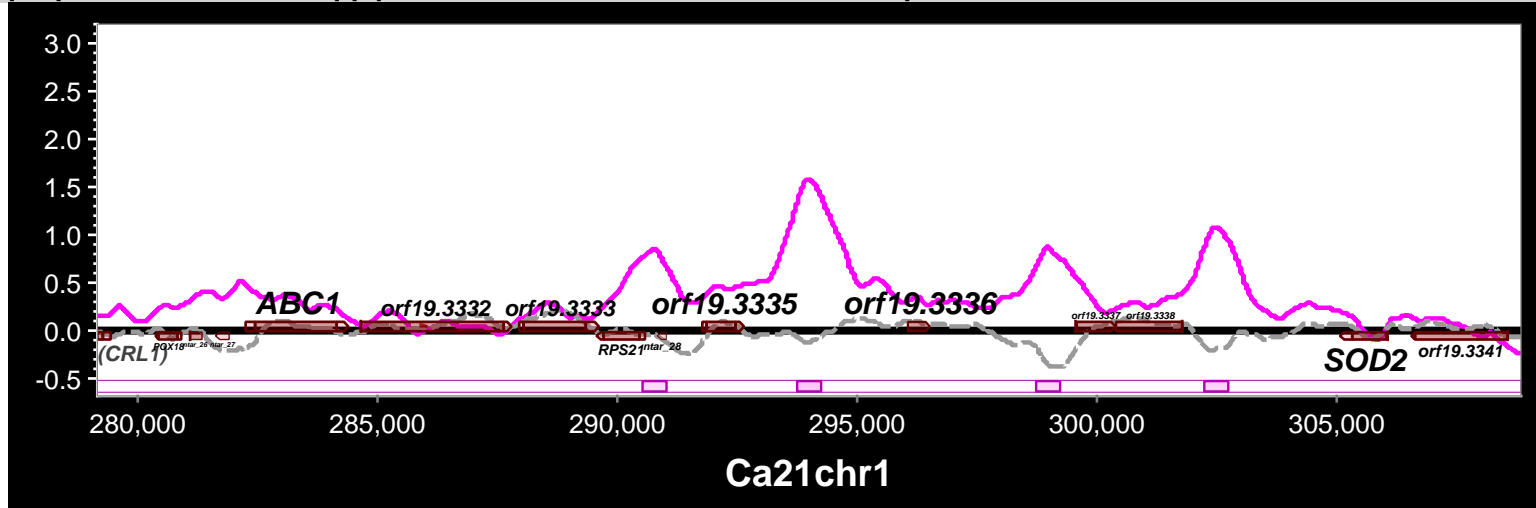

[1.579] Ca21chr3:1744693-1774376 [+] [orf19.6715, orf19.6713, ABD1, orf19.6712, orf19.6717]

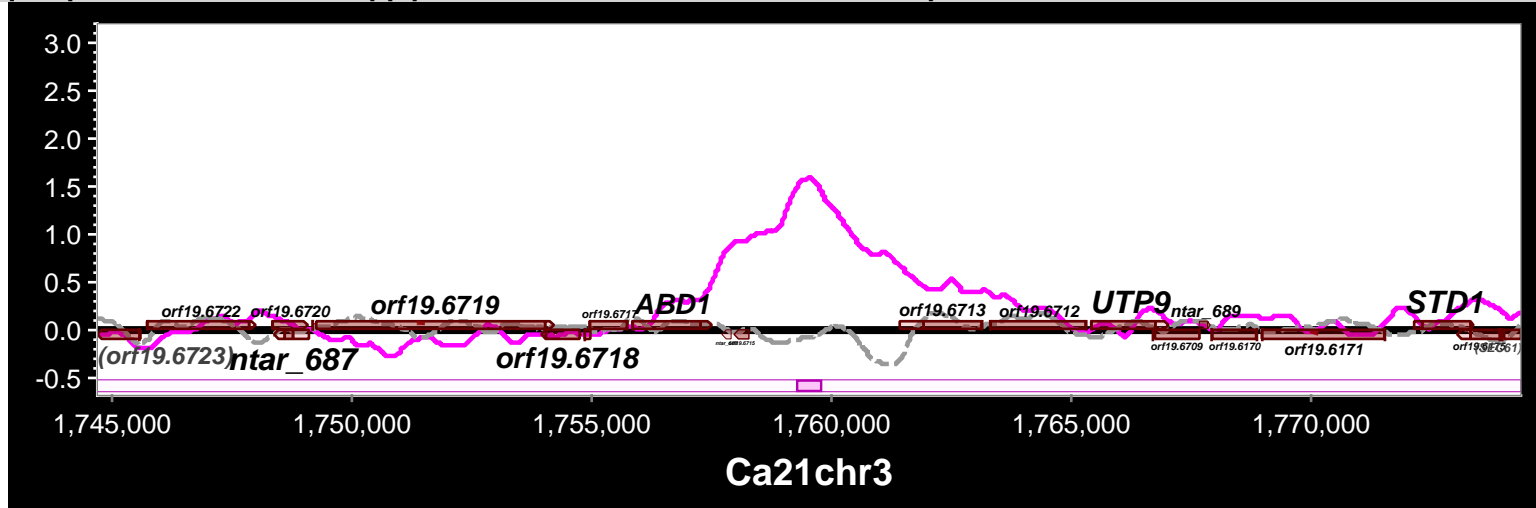

[1.572] Ca21chr3:941268-970951 [+] [TEC1, orf19.5910, CMK1, MAK21, ADE2]

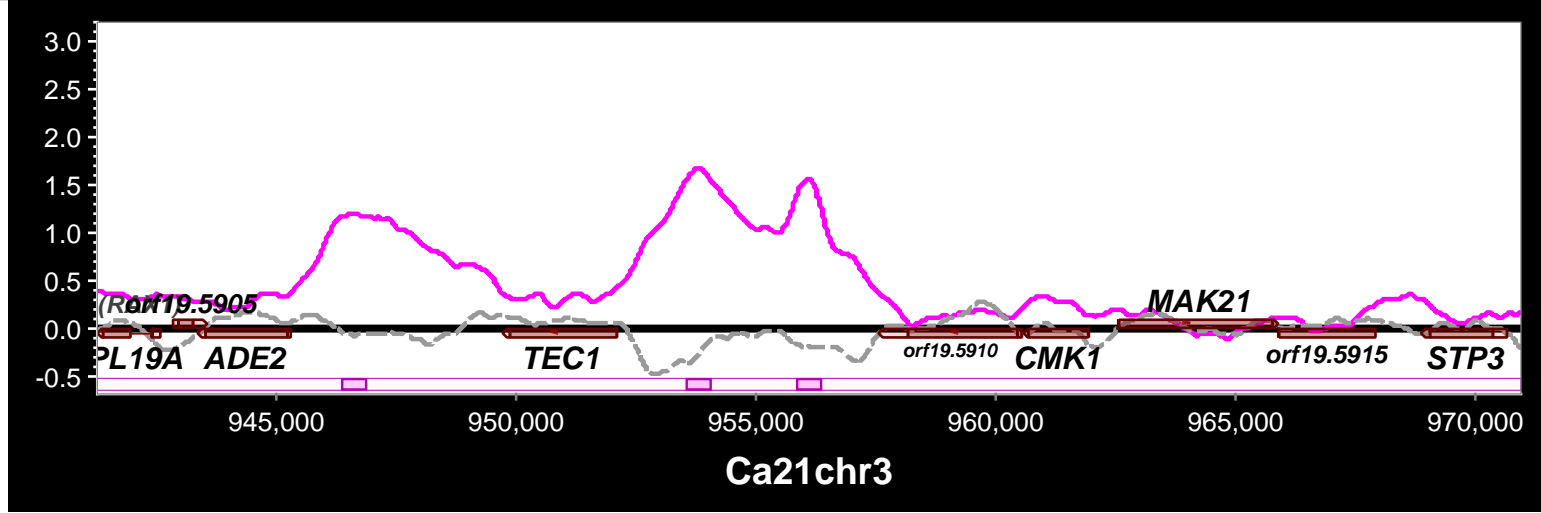

[1.569] Ca21chr3:1575081-1604764 [+] [orf19.6805, orf19.6807, tY(GUA)3, orf19.6809, orf19.6804]

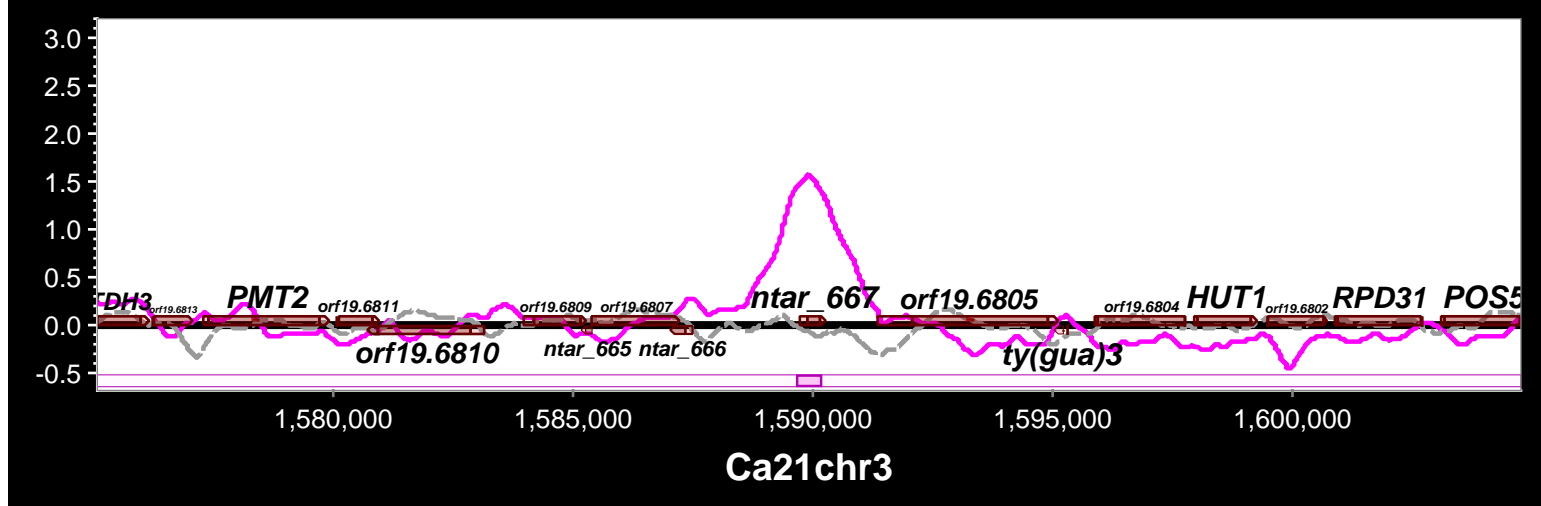

[1.527] Ca21chr6:776304-805987 [+] [ALS1, ALS9, ALS5, orf19.5735.3, CDC50]

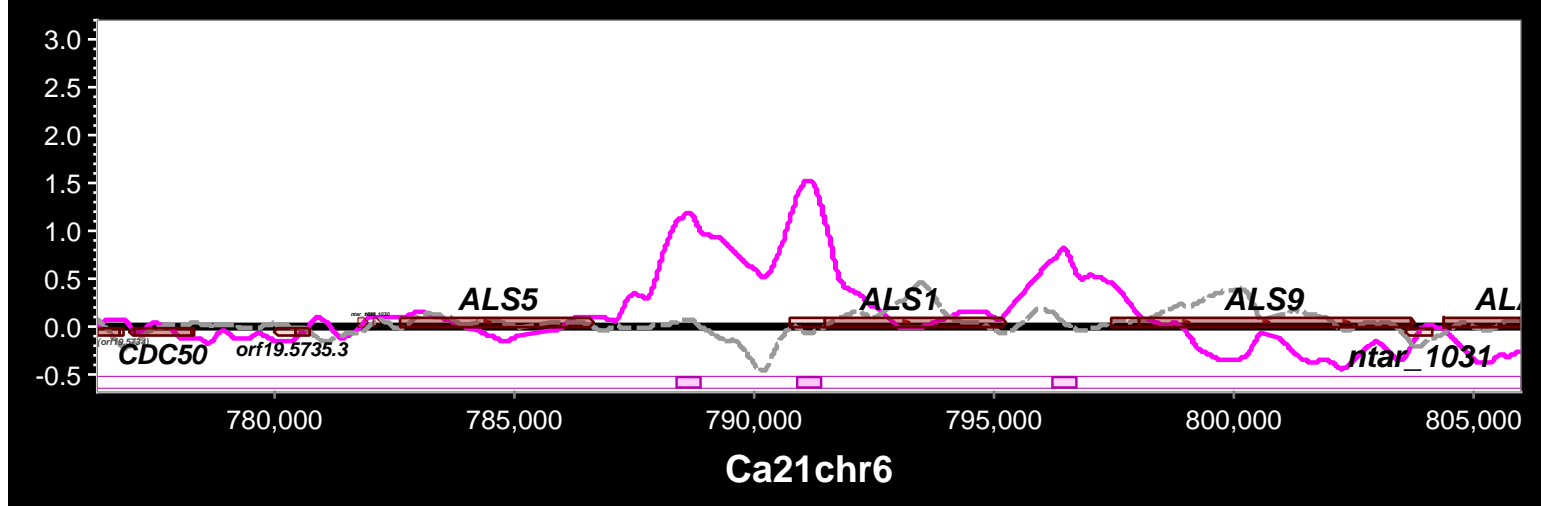

[1.525] Ca21chr2:717637-747320 [+] [orf19.871, orf19.872, orf19.873, COX6, orf19.874]

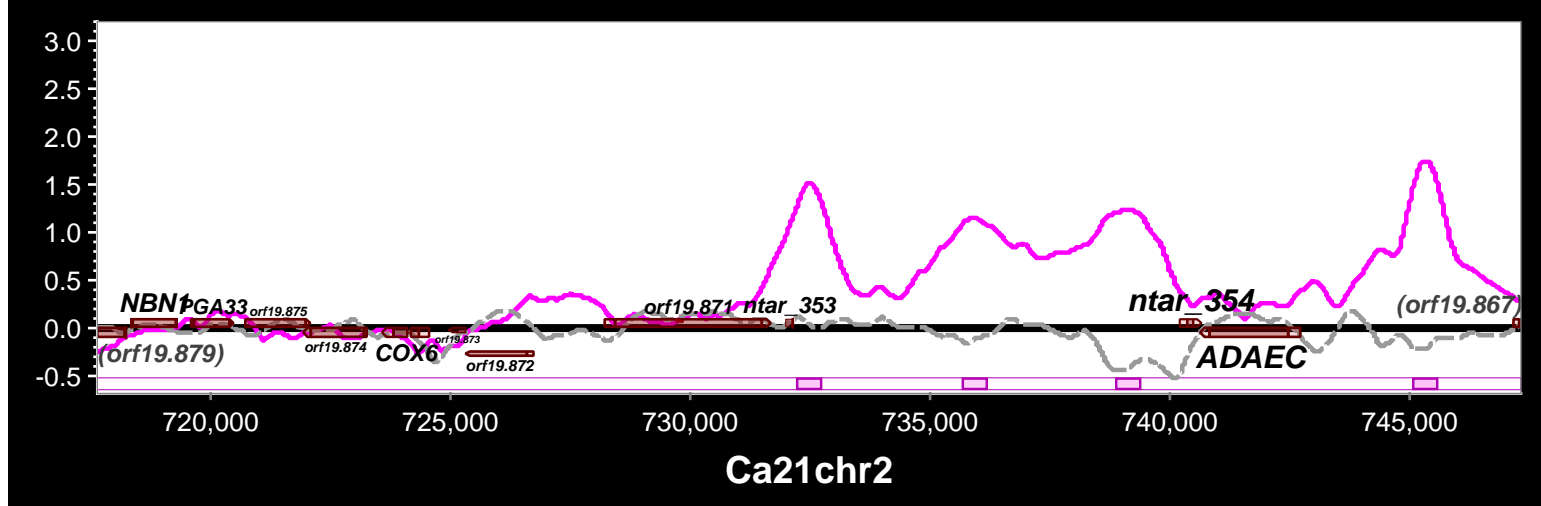

[1.504] Ca21chr1:1310129-1339812 [+] [orf19.1821, UME6, orf19.177, orf19.1823, PGA50]

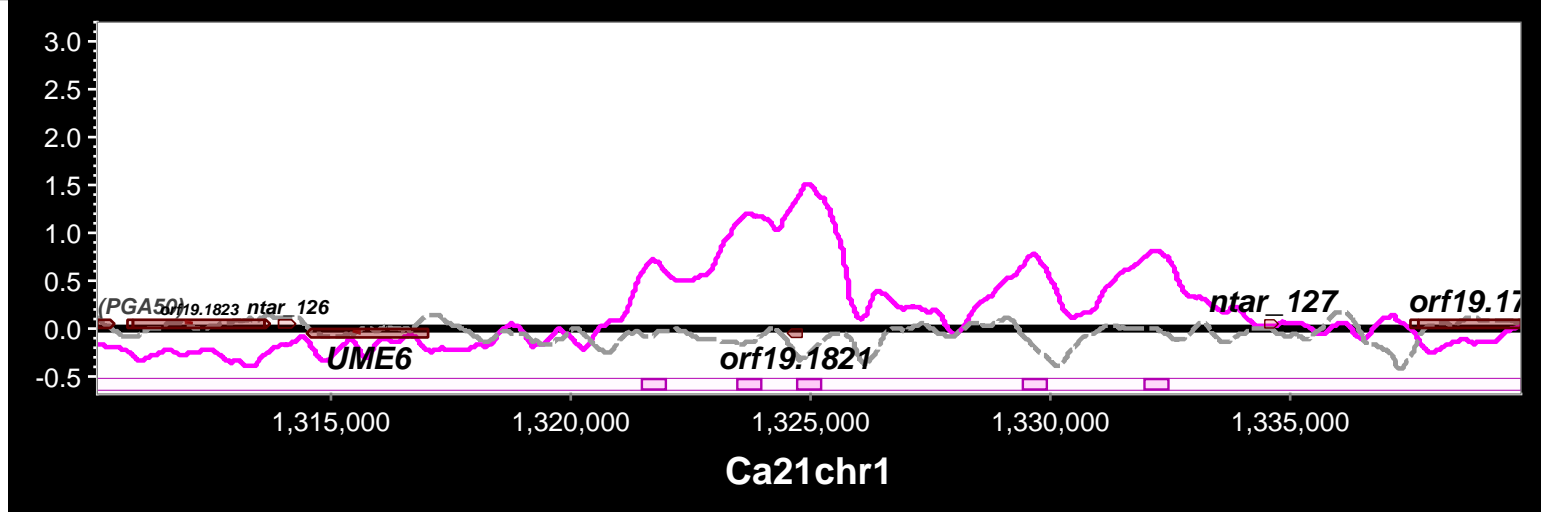

[1.499] Ca21chrR:189869-219552 [+] [orf19.3264.1, TRM1, orf19.3265.1, CCE1, orf19.3266]

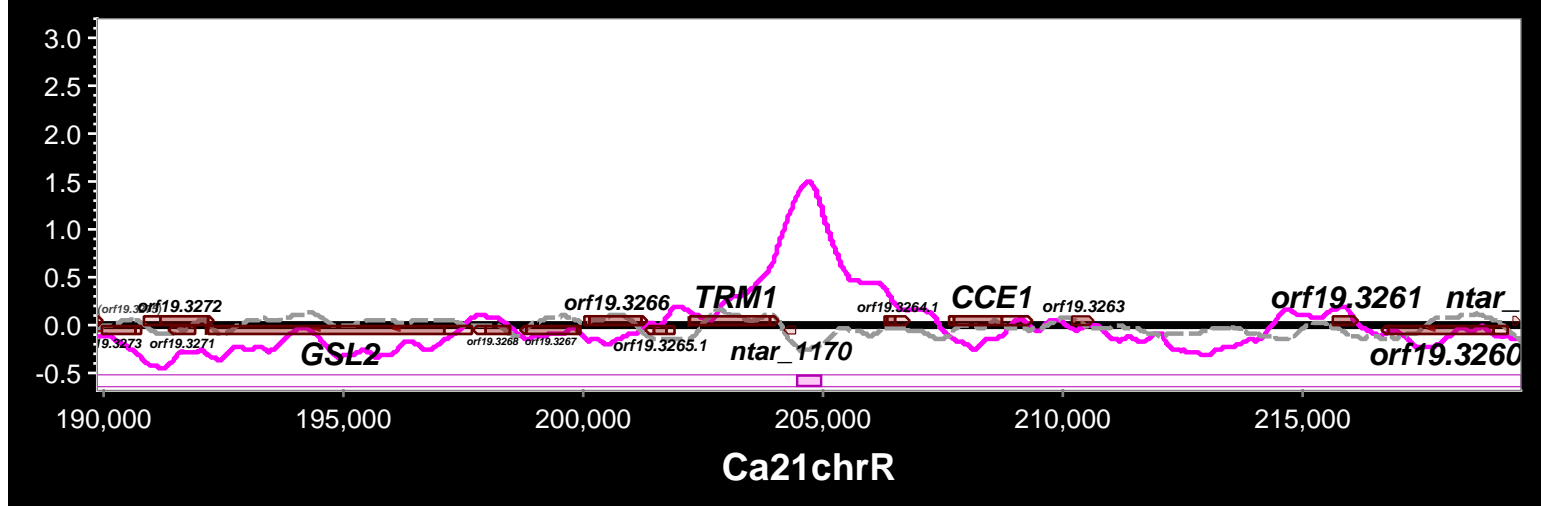

[1.486] Ca21chr1:2840005-2869688 [+] [orf19.4936.1, orf19.4936, CHS3, OP4, FAD3]

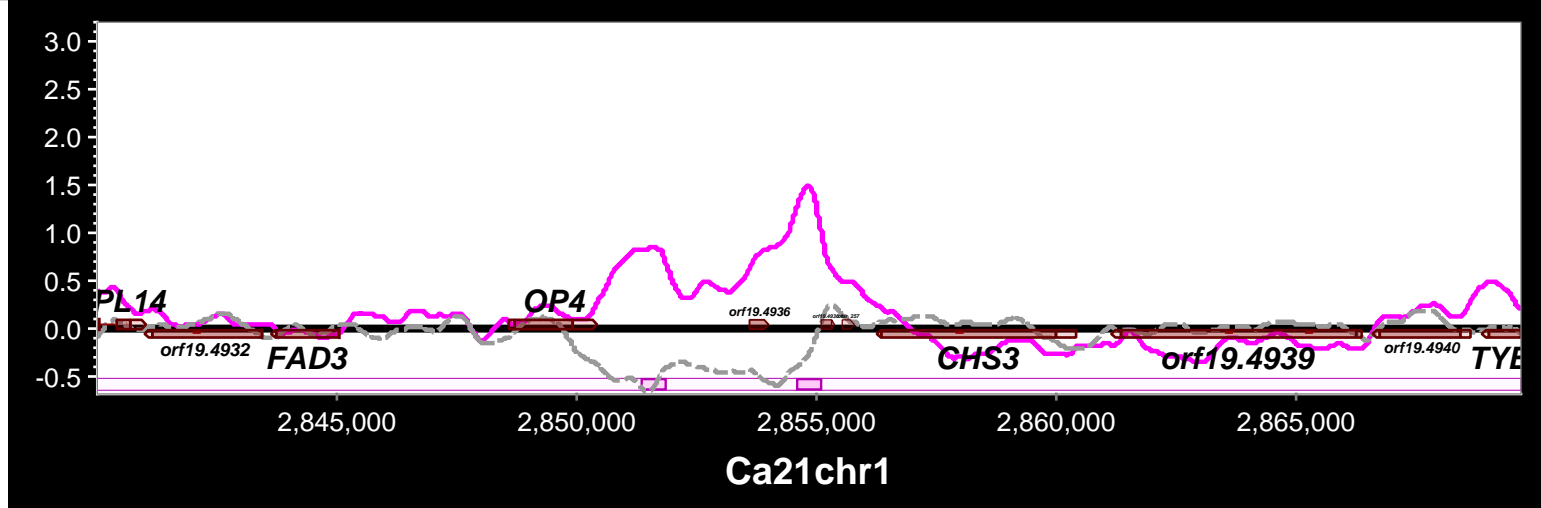

[1.478] Ca21chr3:1094268-1123951 [+] [orf19.5991, orf19.5989, orf19.5987, THI4, orf19.5985]

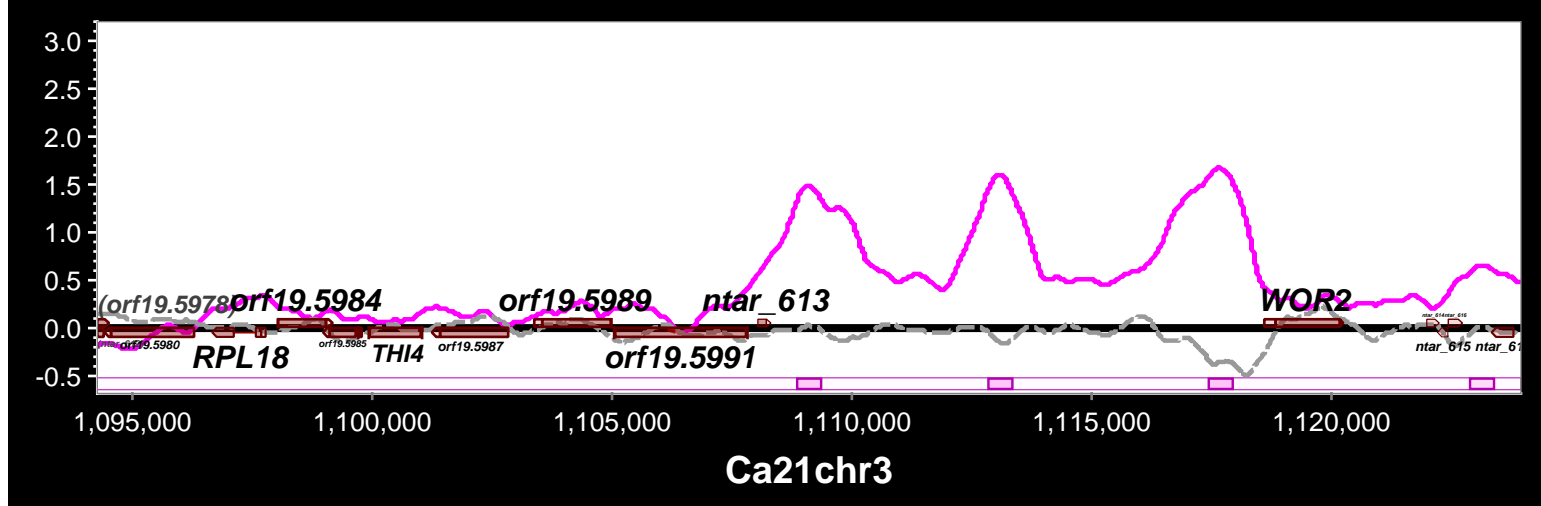

[1.47] Ca21chrR:879836-909519 [+] [orf19.475, orf19.474, orf19.477, TPO4, orf19.478]

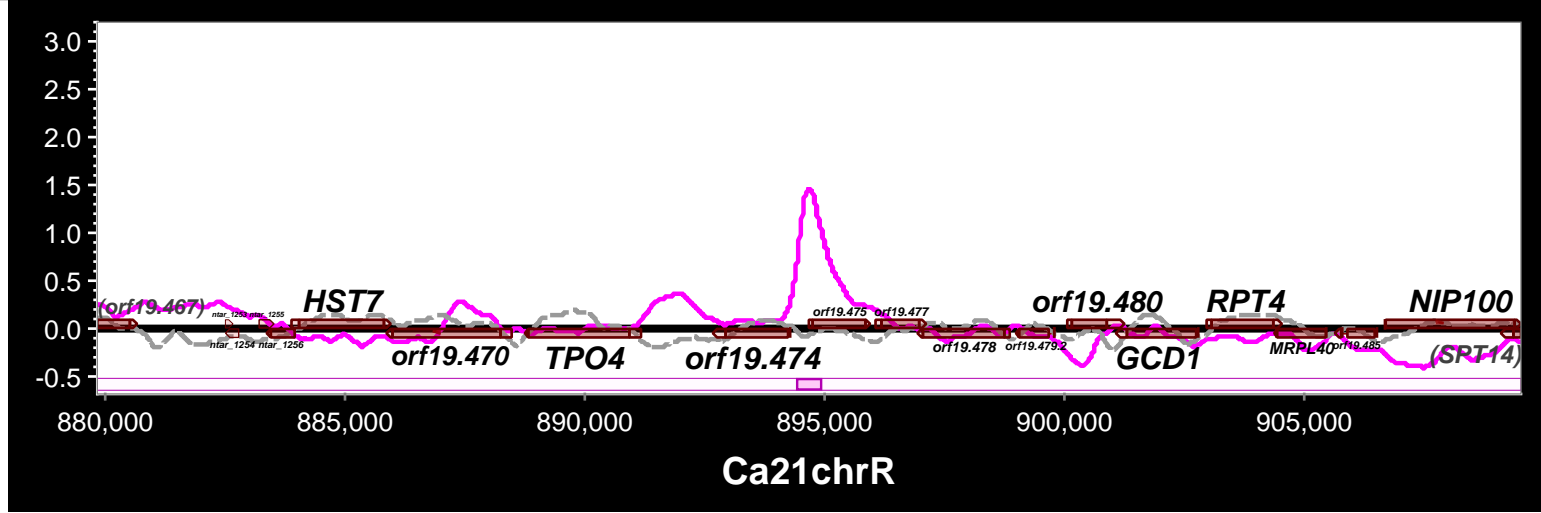

[1.464] Ca21chr7:363581-393264 [+] [orf19.6547, ISU1, LPI9, orf19.6550, orf19.6551]

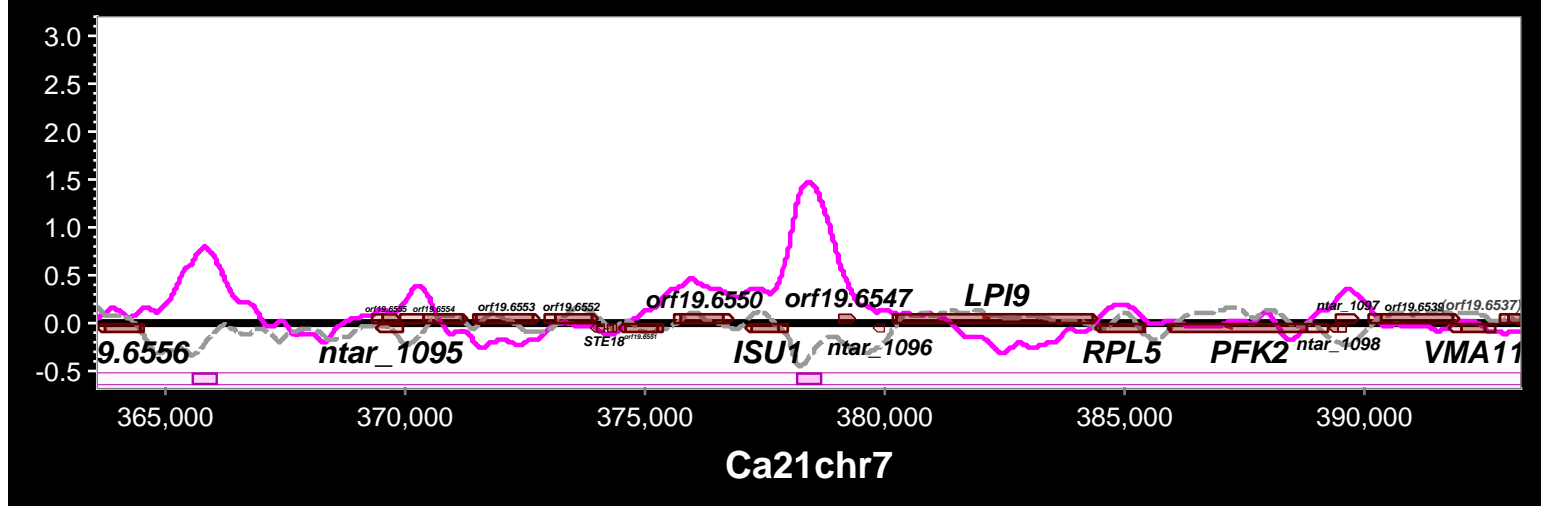

[1.456] Ca21chr6:75724-105407 [+] [FET3, orf19.4210, orf19.4209, FET99, RAD52]

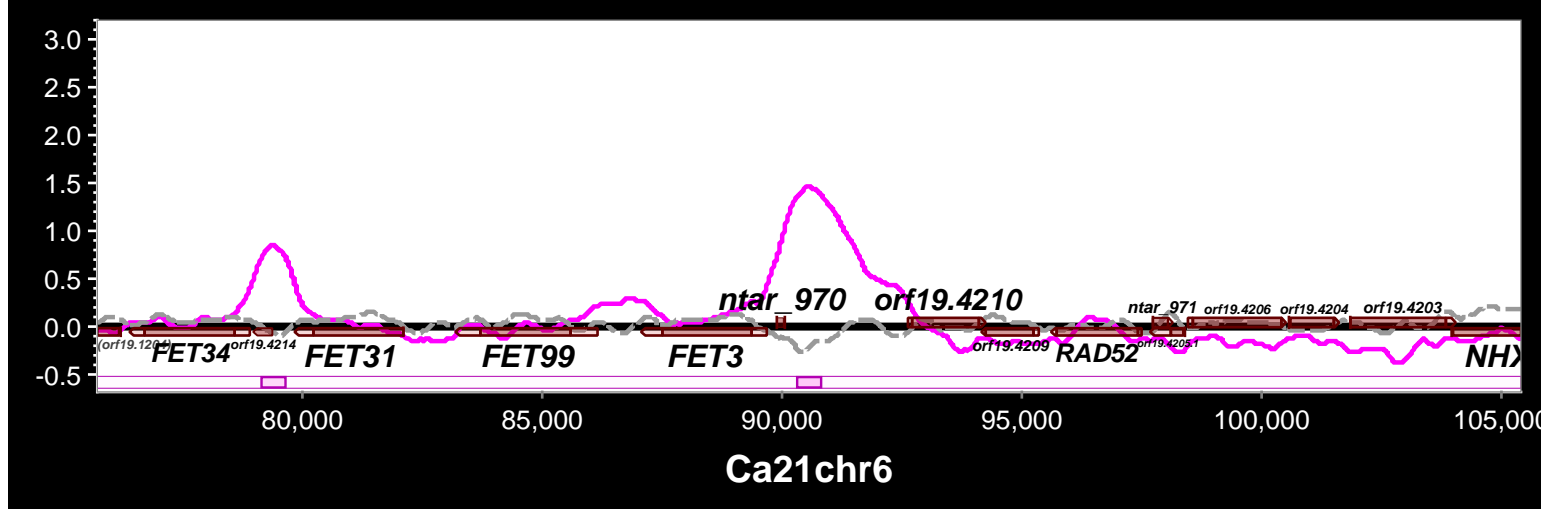

[1.446] Ca21chr7:99904-129587 [+] [orf19.7054, GAC1, orf19.7056, orf19.7052, orf19.7051]

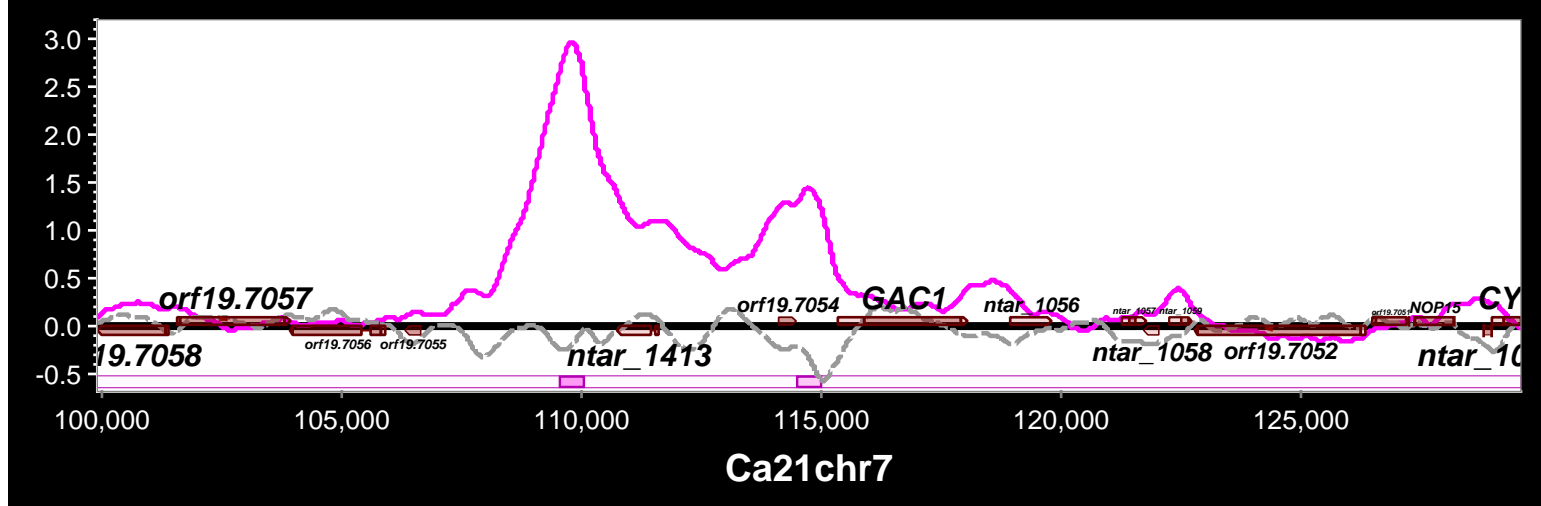

[1.437] Ca21chrR:1979707-2009390 [+] [orf19.7336, PRE8, orf19.7337, ELF1, FCY24]

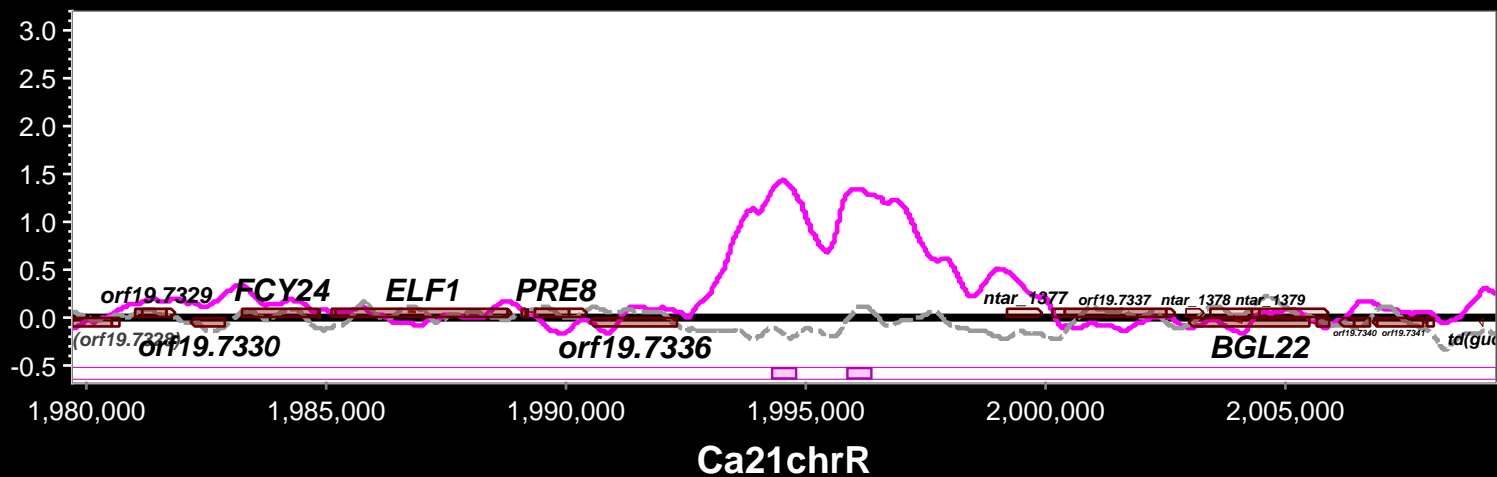

[1.407] Ca21chr5:222176-251859 [+] [orf19.1961, orf19.1963, CLN3, orf19.1964, BUD23]

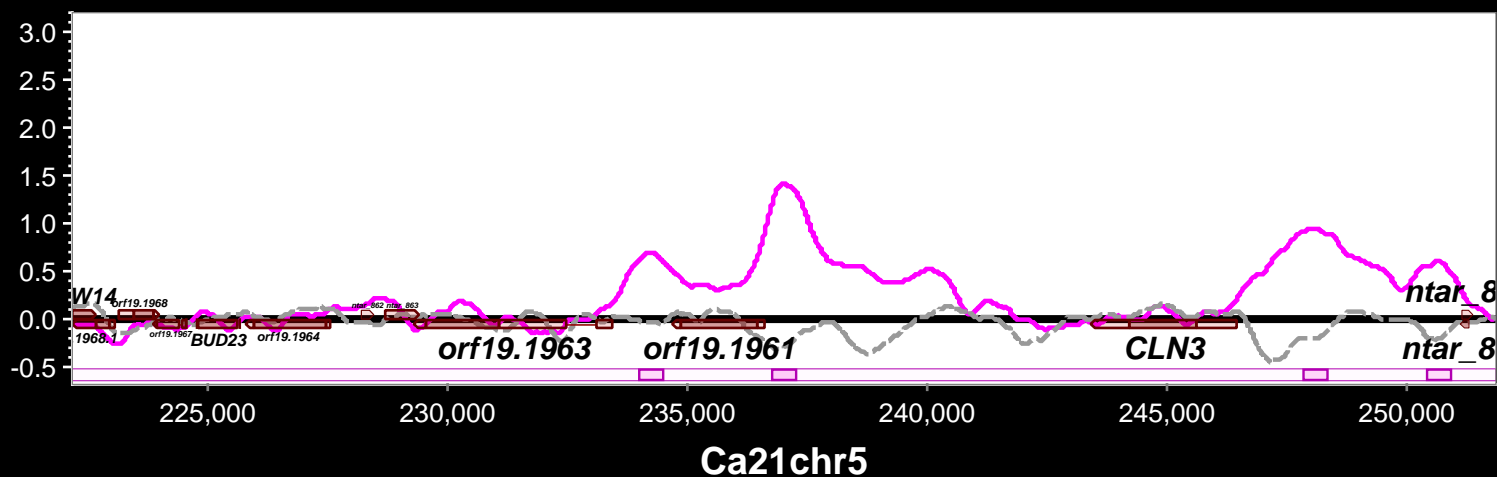

[1.405] Ca21chr1:1071469-1101152 [+] [orf19.450, GAT2, orf19.449, orf19.448, orf19.446.2]

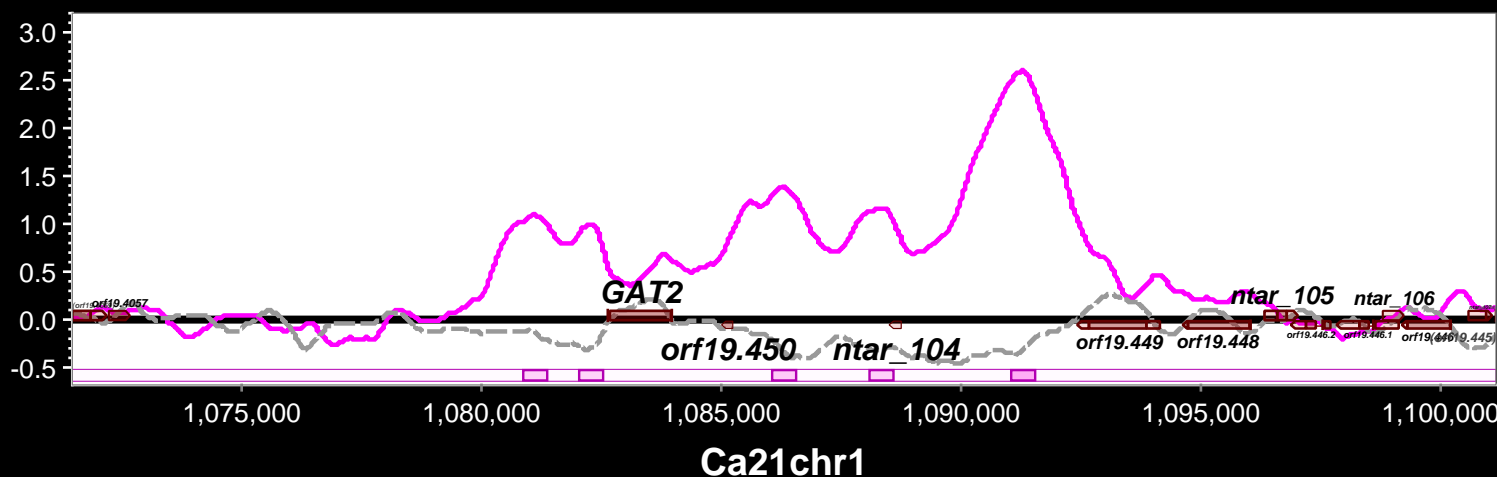

[1.396] Ca21chr4:114177-143860 [+] [orf19.4167, orf19.4166, orf19.4168, orf19.4169, orf19.4170]

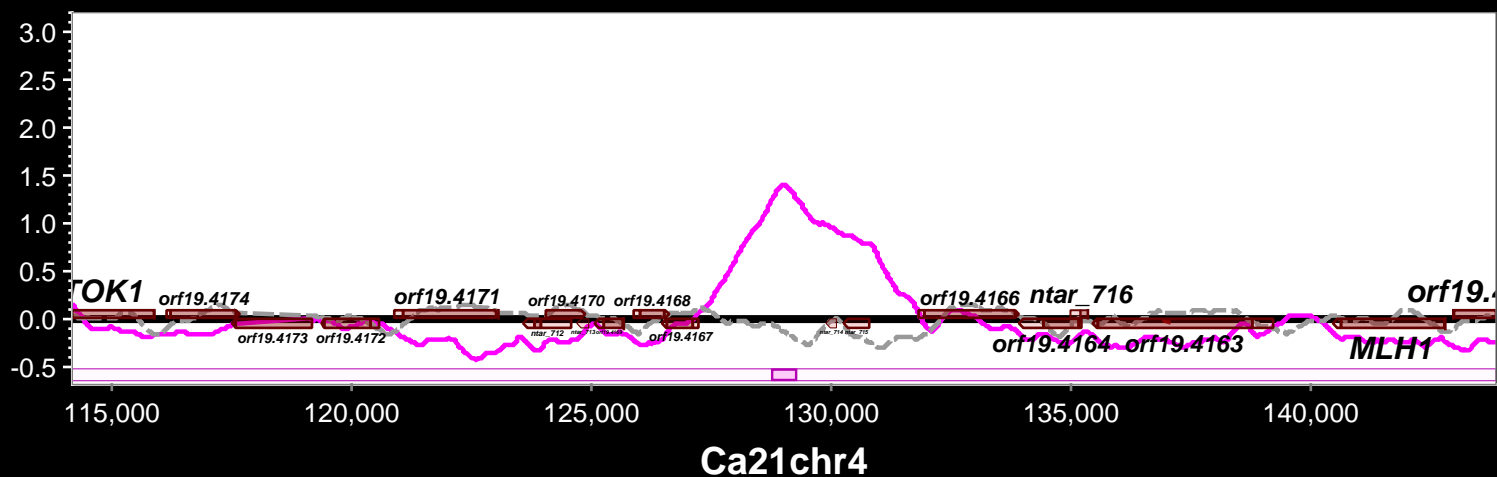

[1.395] Ca21chr1:2856640-2886323 [+] [orf19.4942, TYE7, PSA2, orf19.4940, orf19.4939]

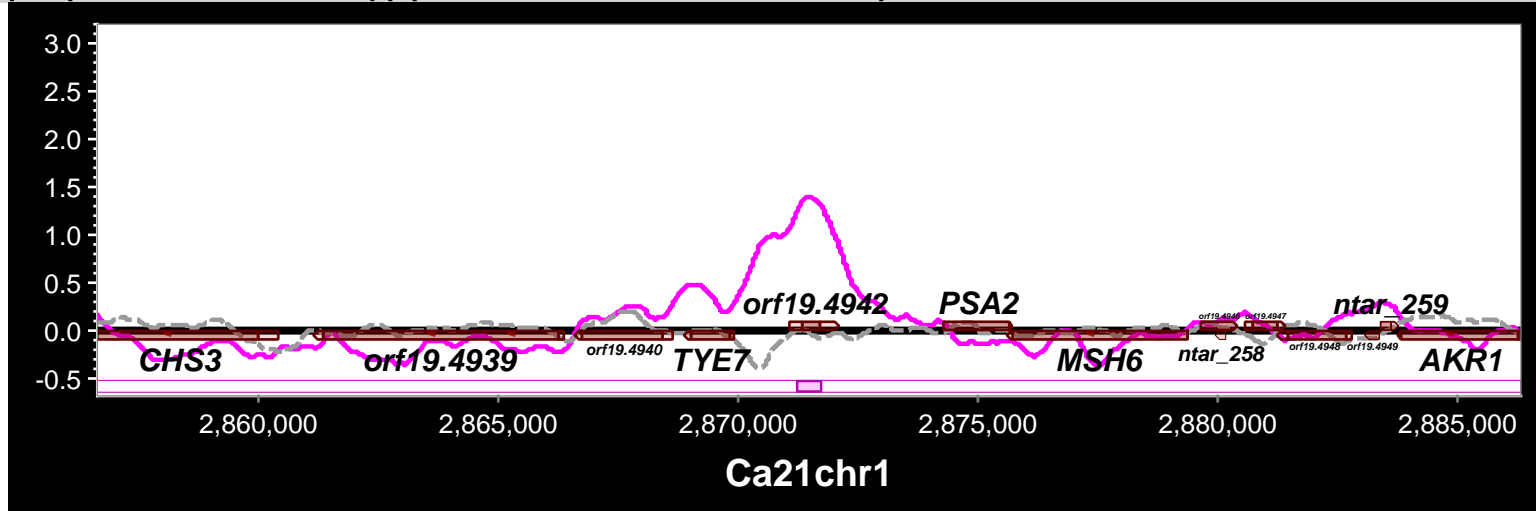

[1.377] Ca21chr2:840028-869711 [+] [DCK1, SSY1, SNRNAU2, orf19.813, orf19.811]

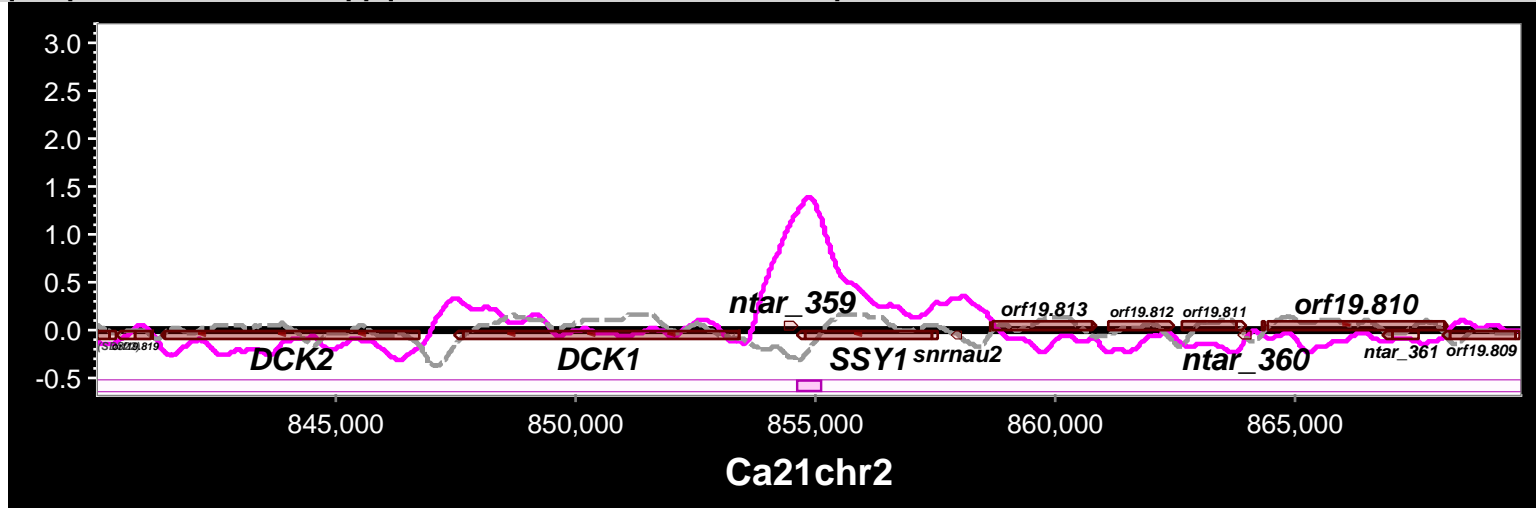

[1.368] Ca21chr7:902458-932141 [+] [NRG1, orf19.7151, orf19.7152, orf19.7149, orf19.7153]

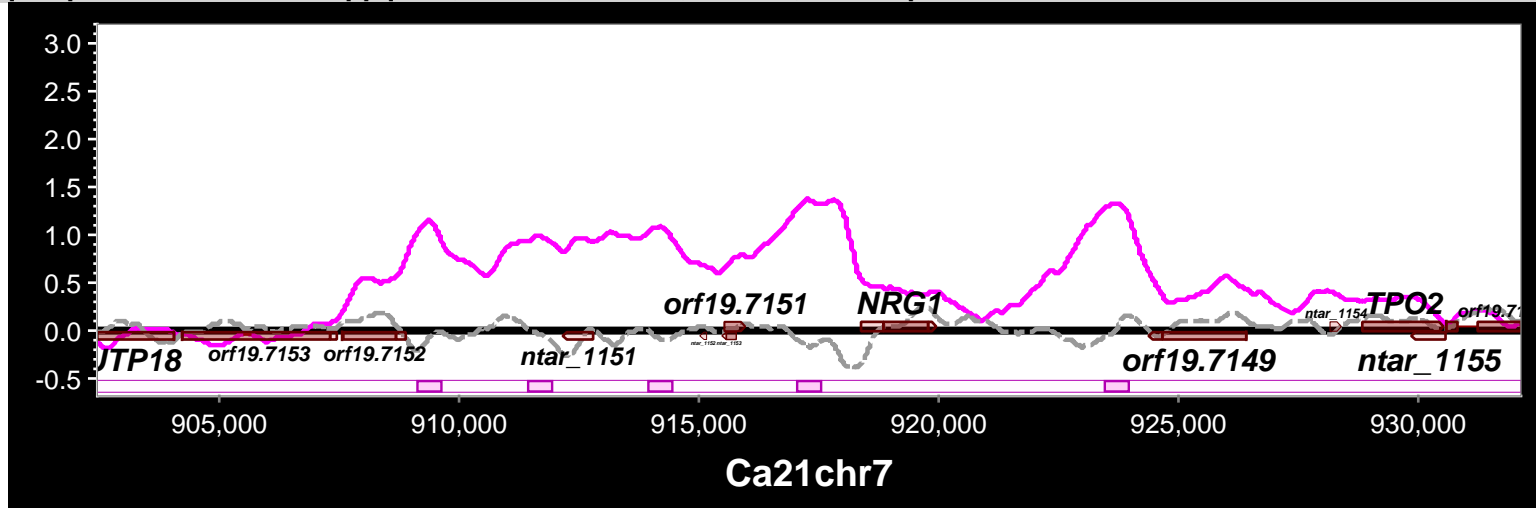

[1.367] Ca21chr4:556168-585851 [+] [orf19.2724, orf19.2725, HIT1, CGR1, orf19.2721]

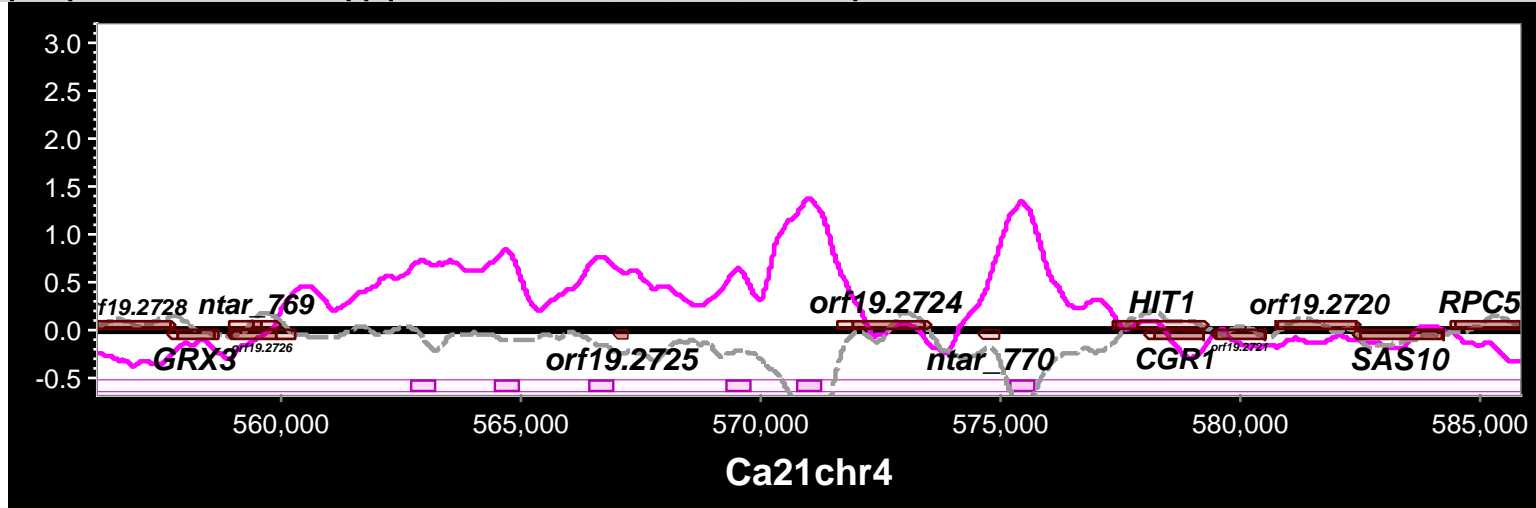

[1.366] Ca21chrR:1-29684 [+] [INO2, orf19.7538, BNR1, orf19.7539.1, tL(CAA)6]

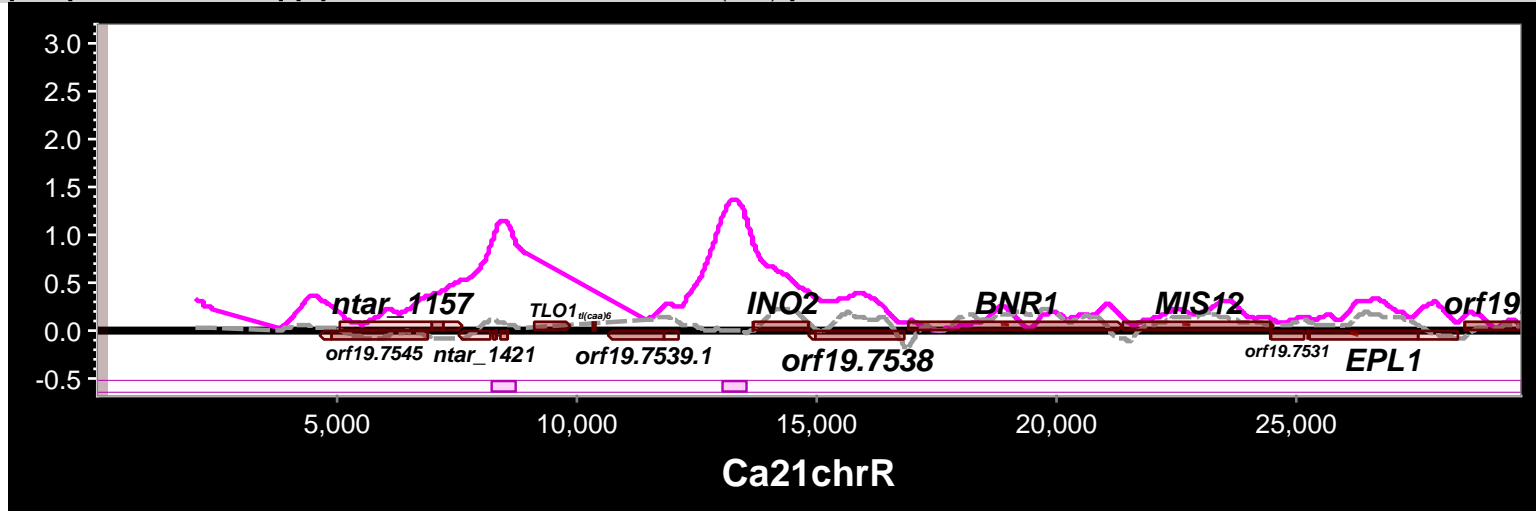

[1.359] Ca21chr6:693398-723081 [+] [orf19.5626, orf19.5625, ARP4, orf19.5627, GLC3]

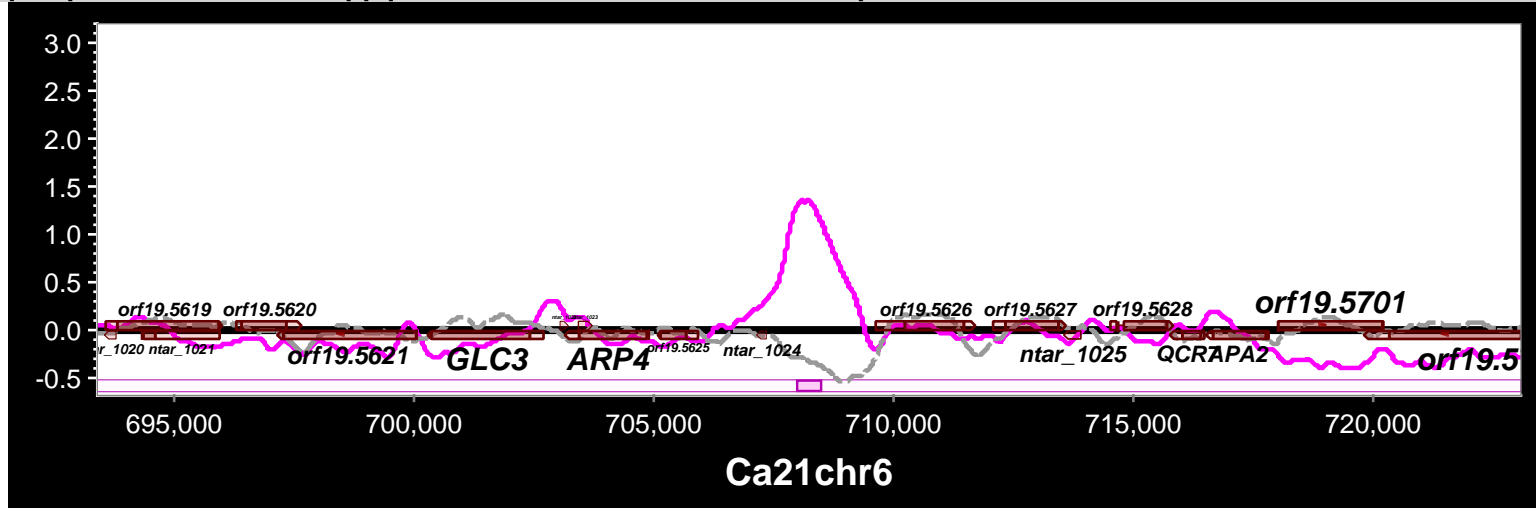

[1.352] Ca21chrR:1981276-2010959 [+] [orf19.7336, orf19.7337, PRE8, BGL22, orf19.7340]

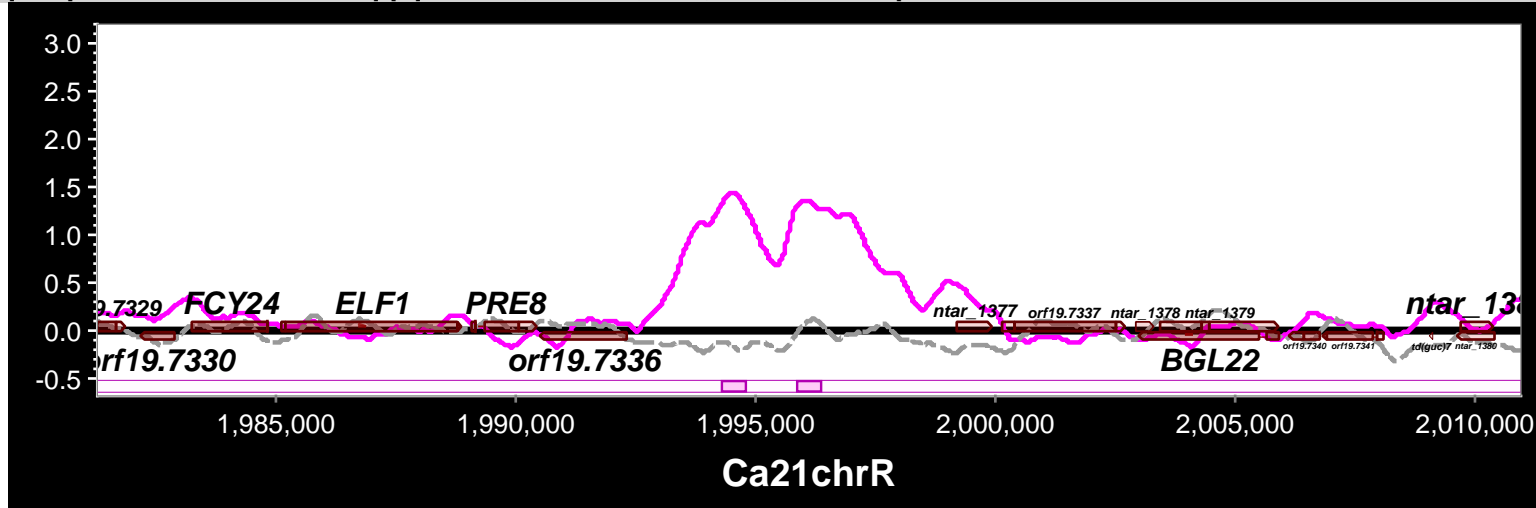

[1.35] Ca21chr5:239862-269545 [+] [orf19.1959, CYC3, CLN3, orf19.1956, orf19.1955]

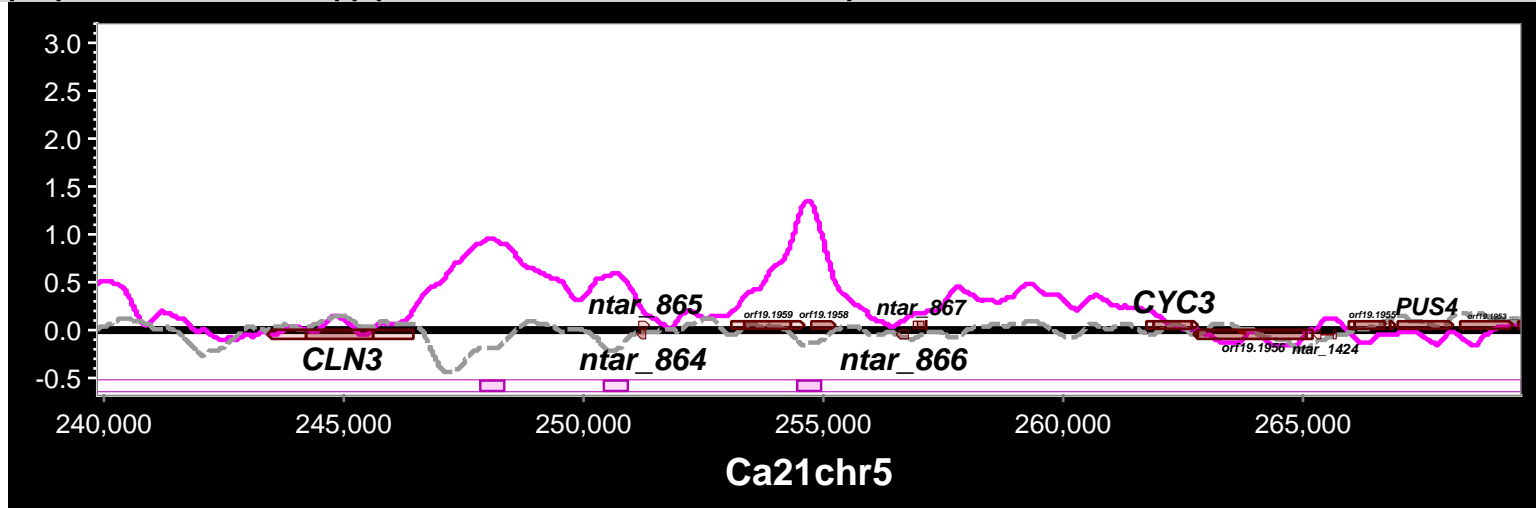



[1.341] Ca21chr1:803435-833118 [+] [orf19.4459, orf19.4461, orf19.4463, BNI4, SEN15]

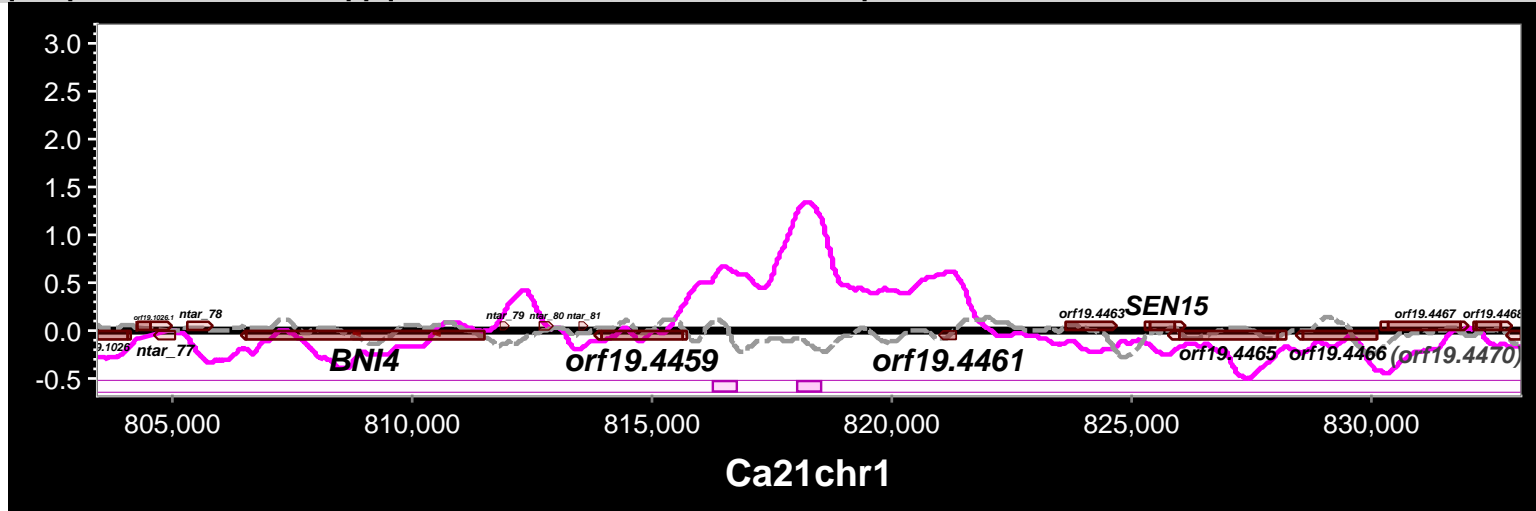

[1.34] Ca21chr4:560613-590296 [+] [HIT1, orf19.2724, CGR1, orf19.2721, orf19.2720]

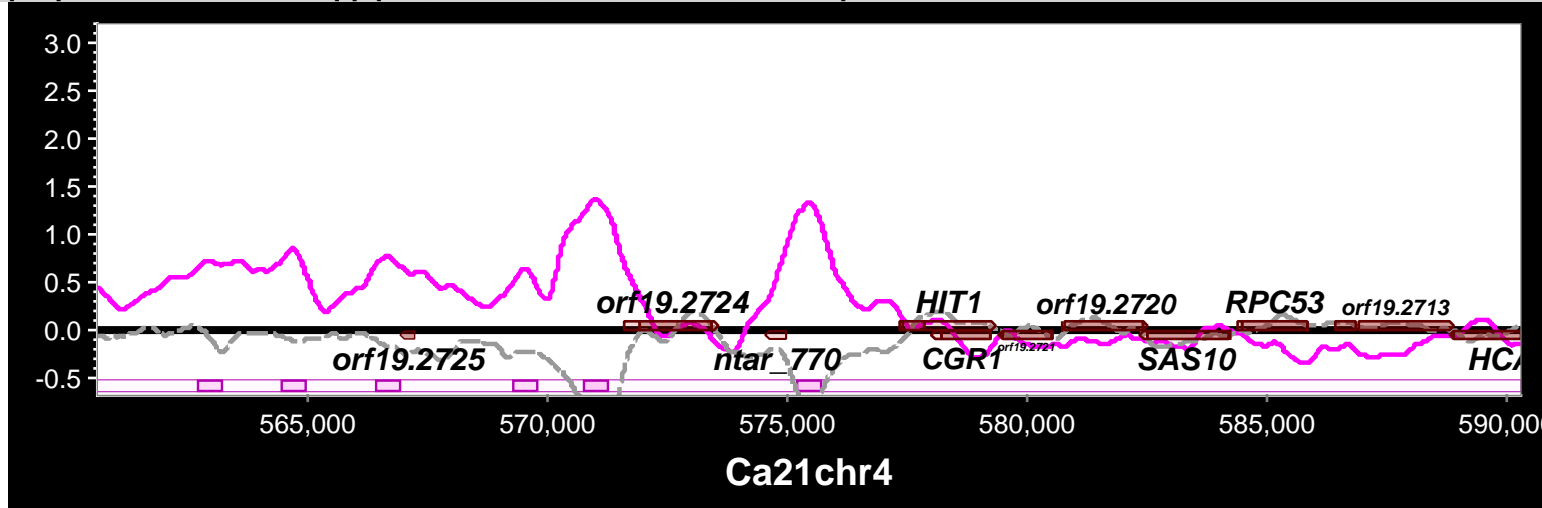

[1.338] Ca21chr3:1342484-1372167 [+] [orf19.7380, orf19.7381, FAA2, CAM1, MNN9]

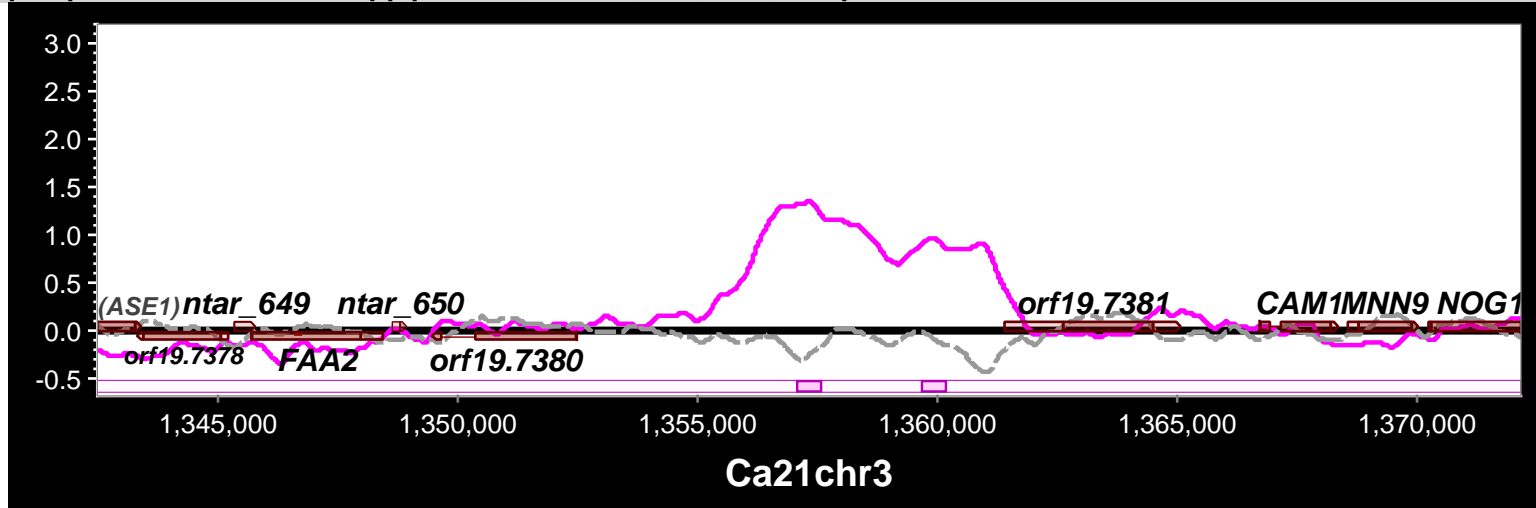

[1.333] Ca21chr6:159226-188909 [+] [orf19.90, orf19.89, ILV5, orf19.91, GPX1]

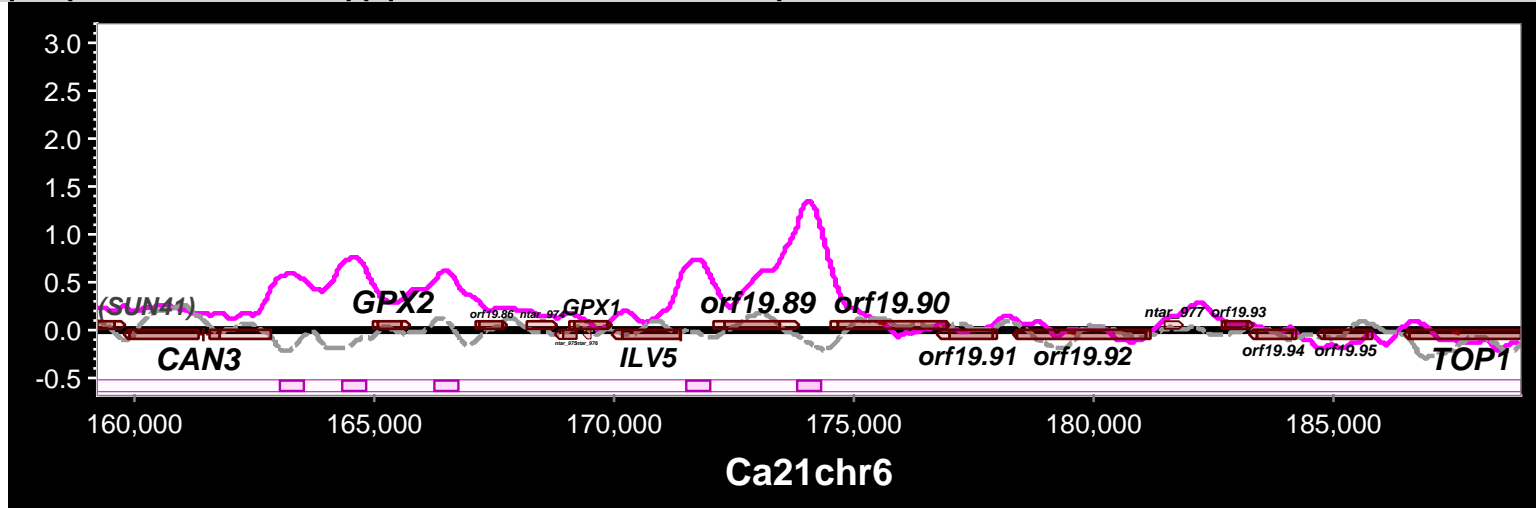

[1.325] Ca21chr4:465067-494750 [+] [orf19.2766, PGA62, orf19.2763, AHP1, PGA59]

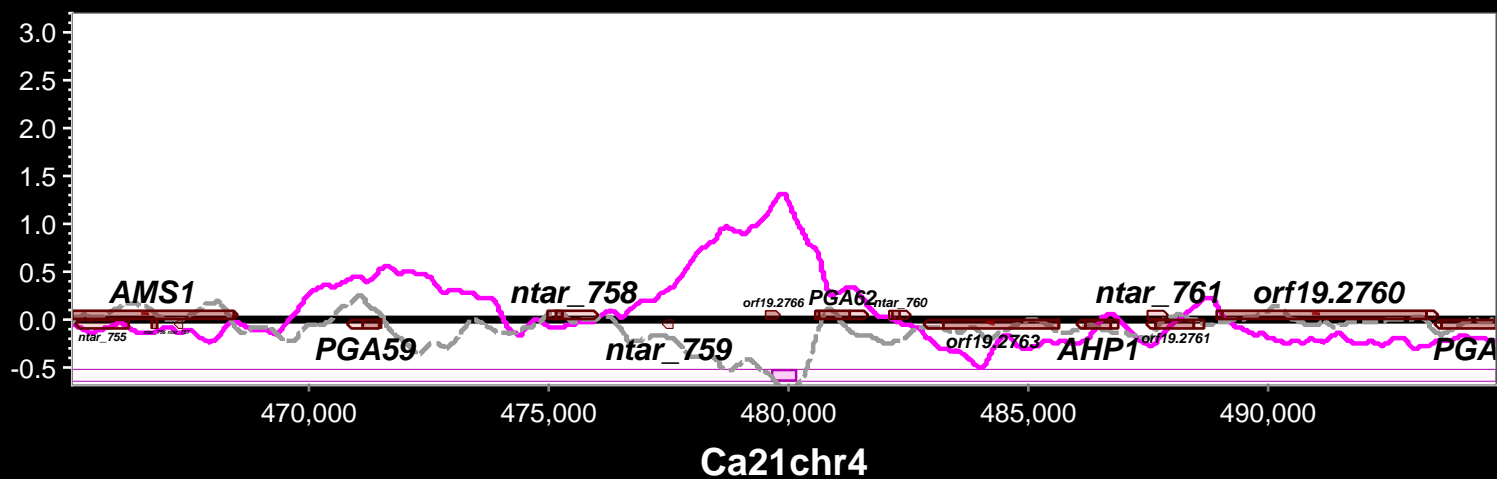

[1.324] Ca21chr7:908873-938556 [+] [orf19.7149, NRG1, TPO2, orf19.7144, orf19.7151]

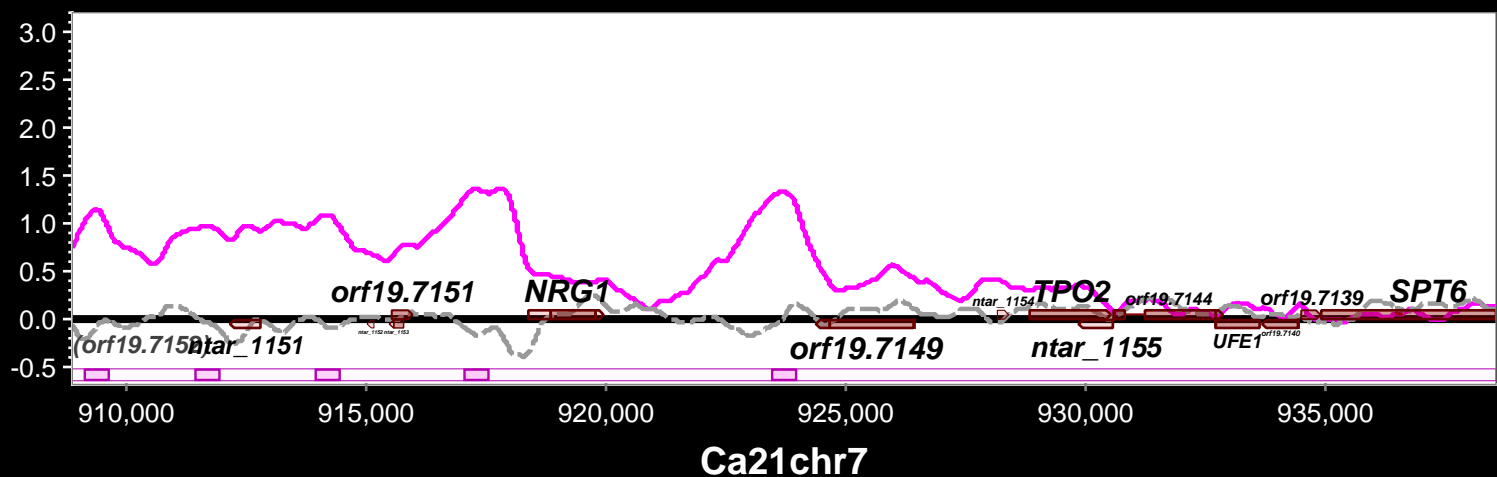

[1.289] Ca21chr6:825372-855055 [+] [IHD1, PGA61, tA(UGC)2, SNQ2, orf19.5763]

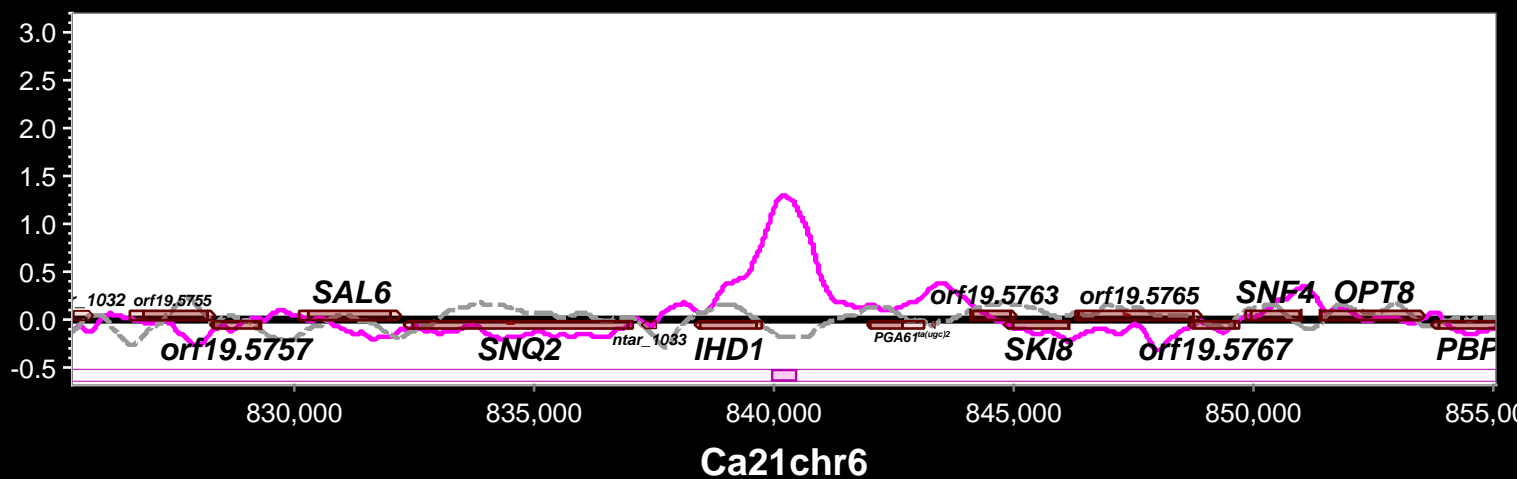

[1.284] Ca21chr4:1266374-1296057 [+] [orf19.1265, CFL2, CFL1, orf19.1266, orf19.1267]

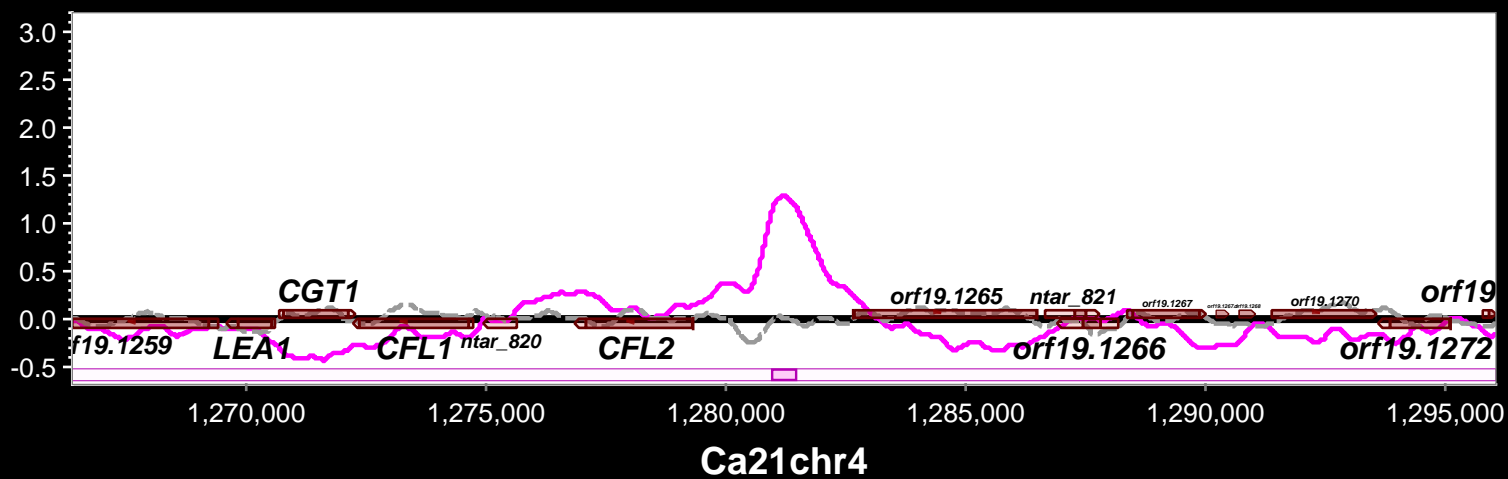

[1.276] Ca21chrR:324002-353685 [+] [orf19.2529.1, tL(UAA)2, orf19.2529, orf19.2530, CSP37]

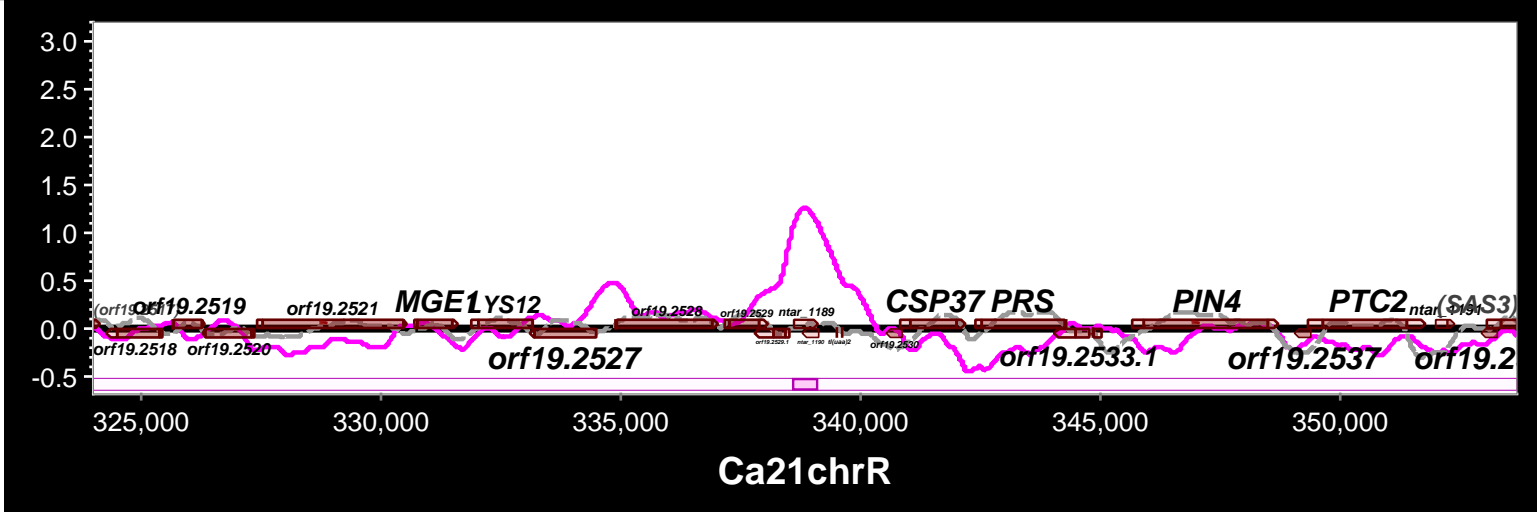

[1.275] Ca21chr7:438740-468423 [+] [CUP9, EXO70, LIG1, GRX1, orf19.6509]

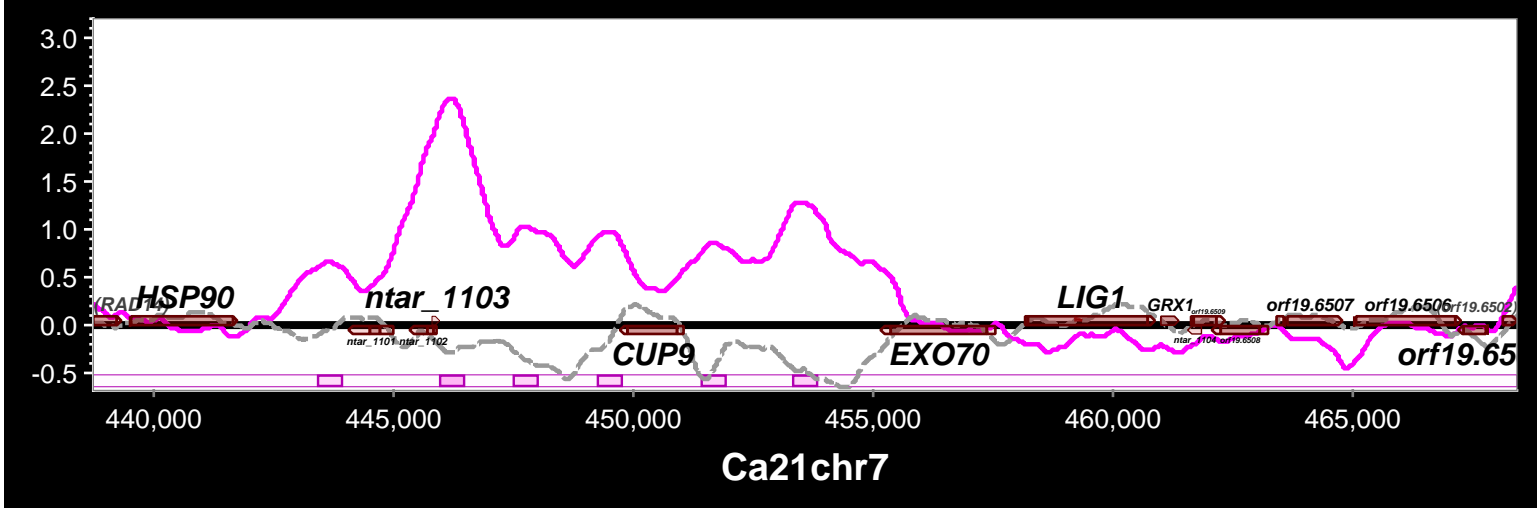

[1.258] Ca21chr4:722461-752144 [+] [orf19.3378, orf19.3376, HWP2, ECE1, RBT1]

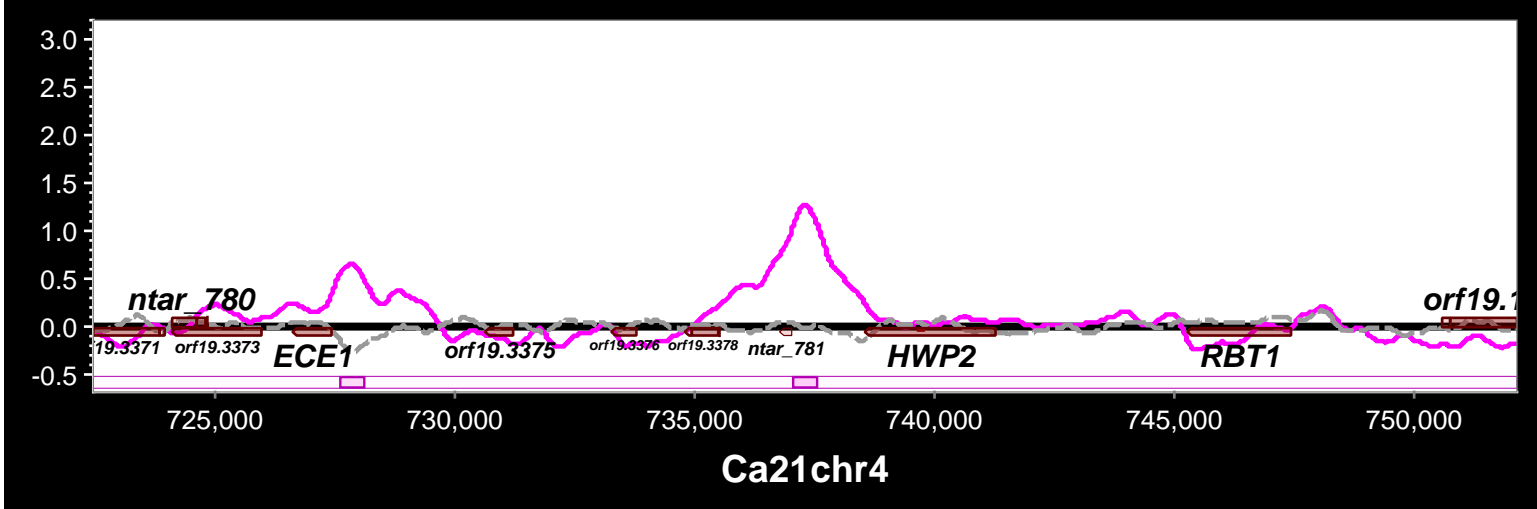

[1.253] Ca21chr6:750713-780396 [+] [orf19.5728, FGR17, orf19.5727, orf19.5725, orf19.5730]

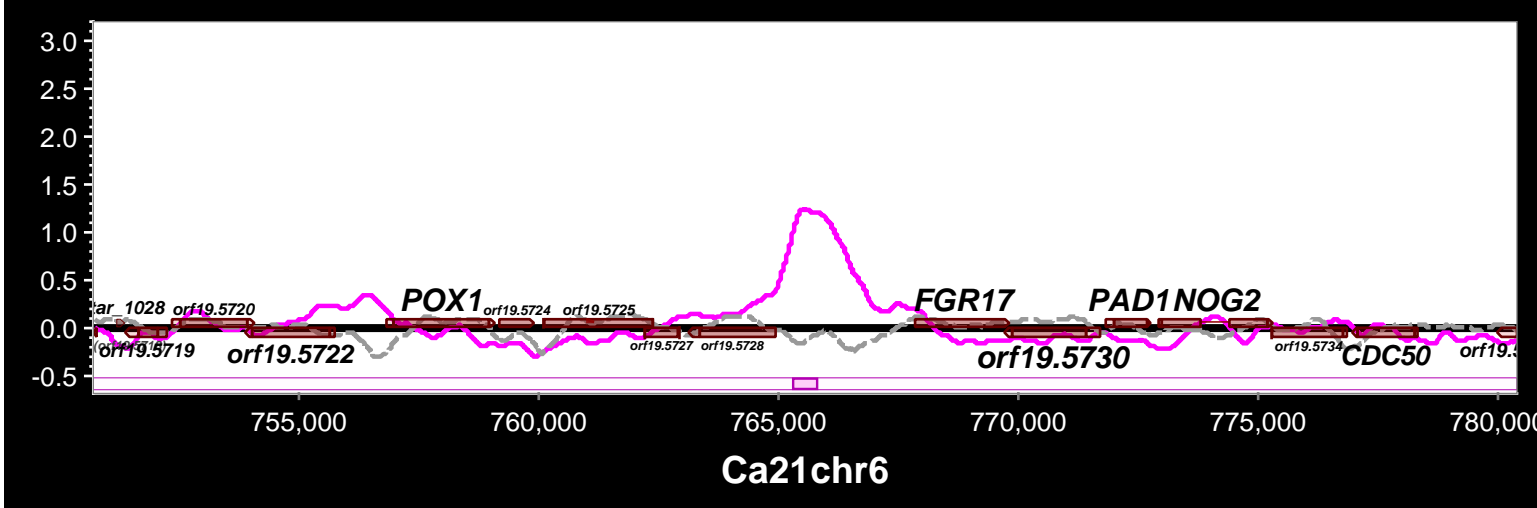

[1.25] Ca21chr7:773056-802739 [+] [orf19.6688, orf19.6687, ENP2, ARG4, ISY1]

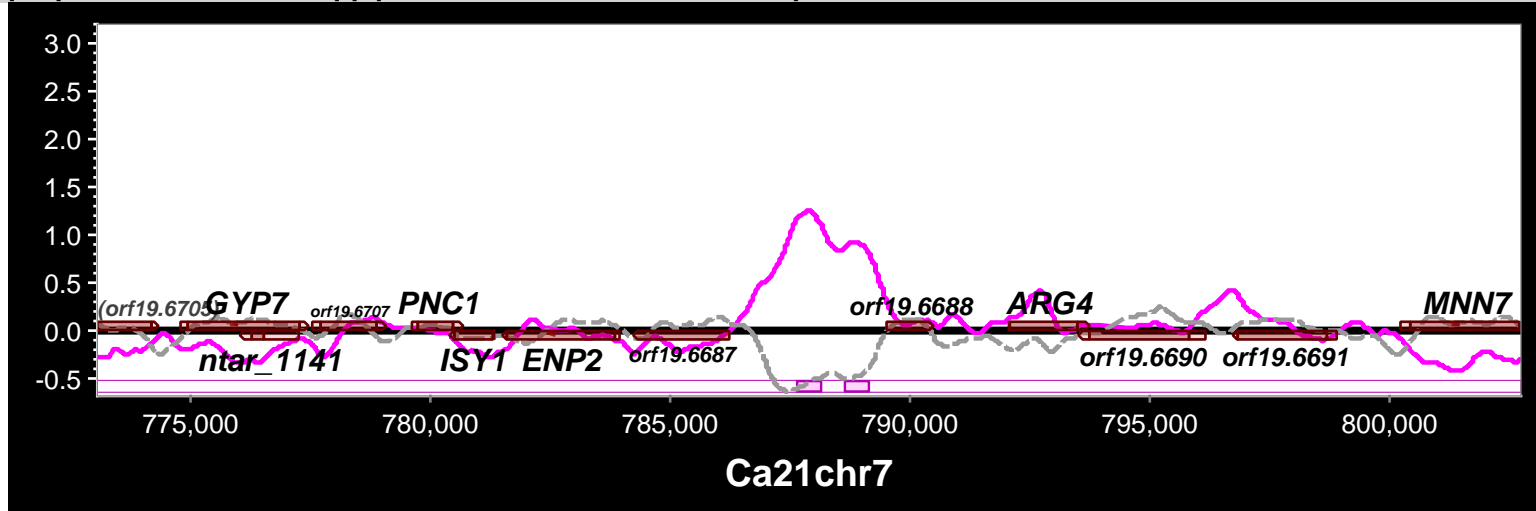

[1.249] Ca21chr5:840410-870093 [+] [orf19.1105.3, PGA56, orf19.1105, orf19.3220, orf19.1106]

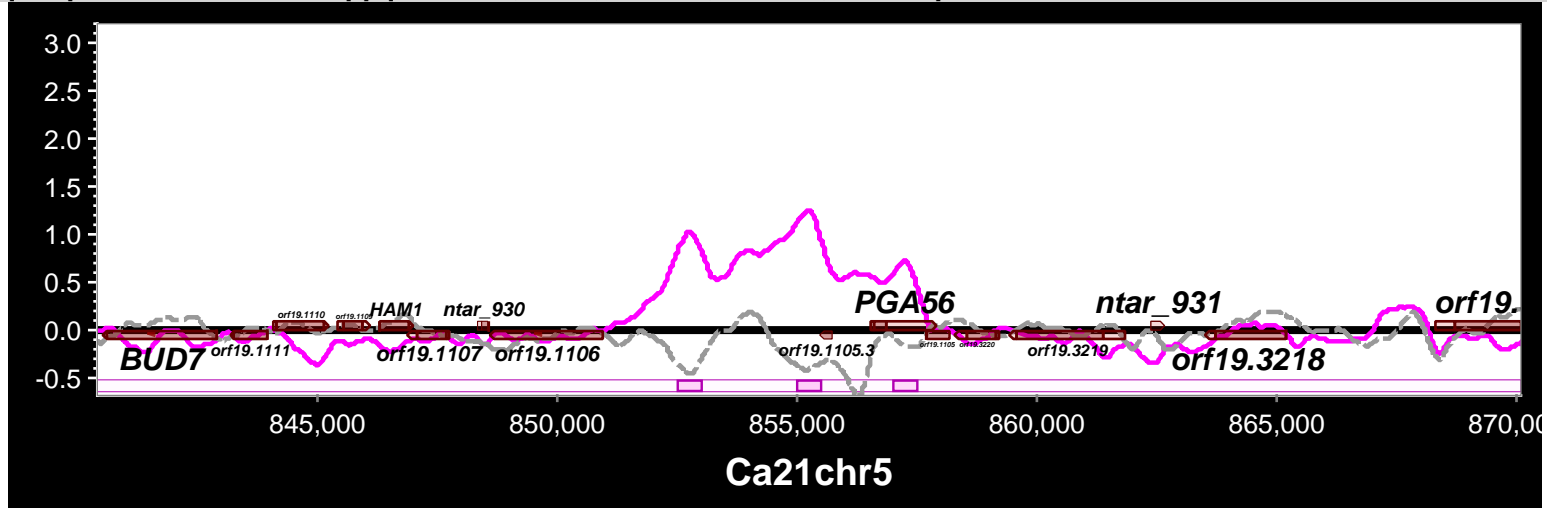

[1.248] Ca21chr1:2213310-2242993 [+] [WOR1, orf19.4883, MIR1, orf19.4882, orf19.4886]

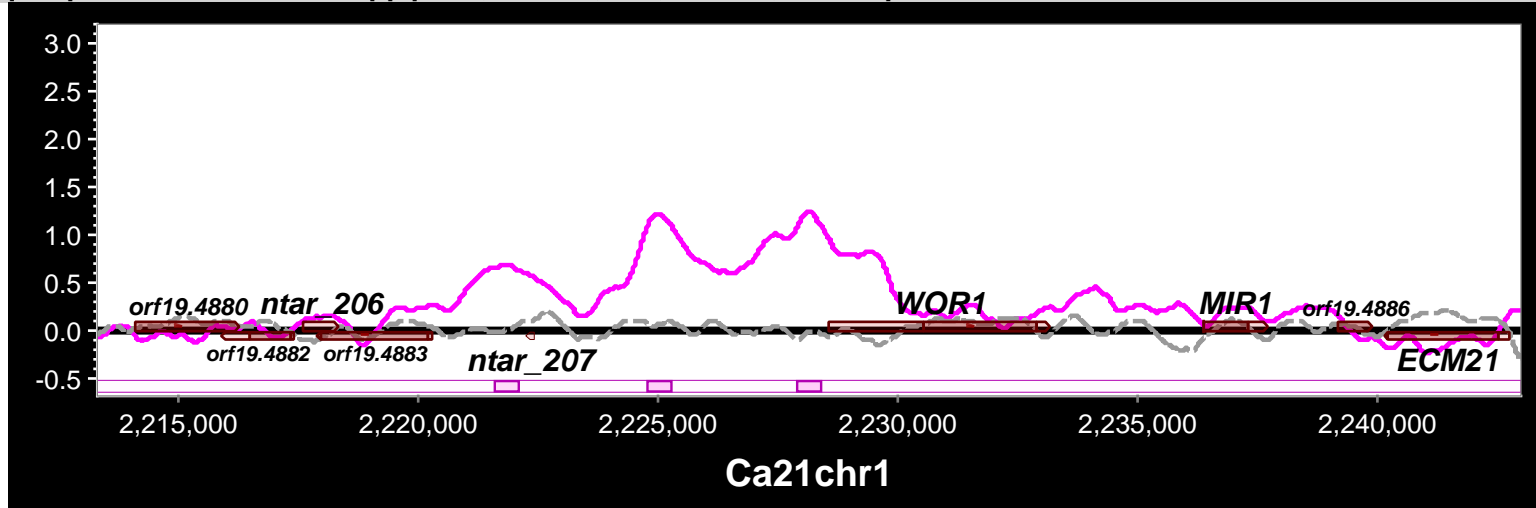

[1.247] Ca21chr1:390955-420638 [+] [HGT1, orf19.4528, orf19.4529, orf19.4530.1, HSP30]

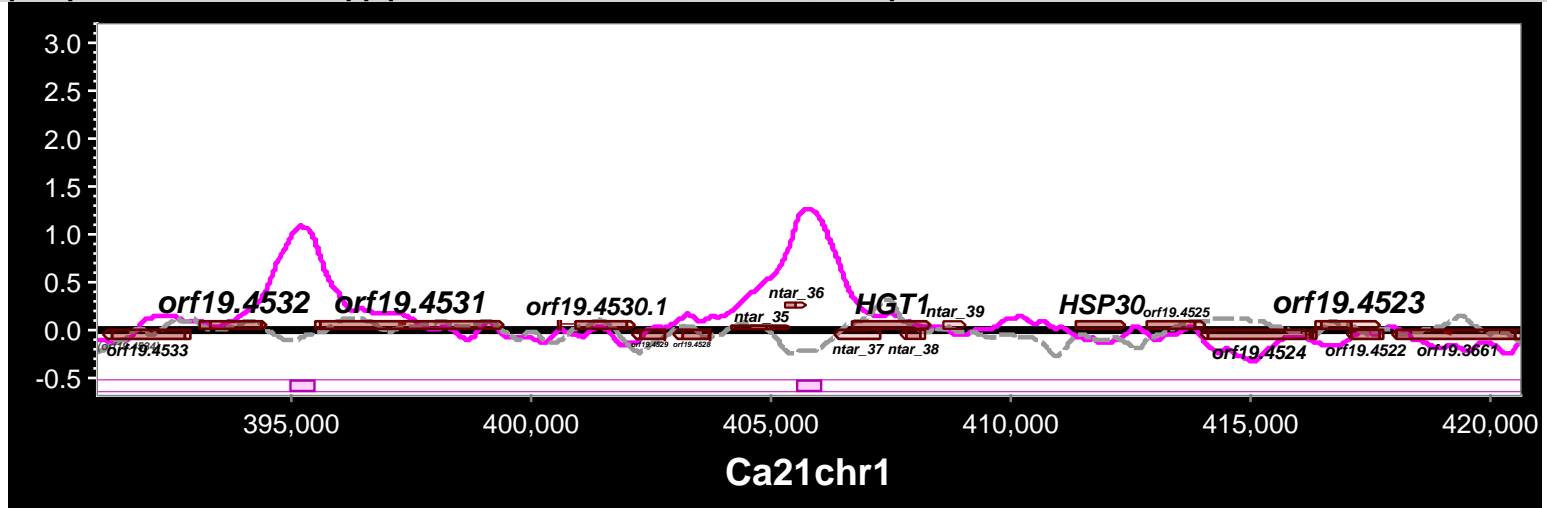

[1.244] Ca21chrR:860318-890001 [+] [orf19.467, IFF9, HST7, orf19.4358, orf19.4357]

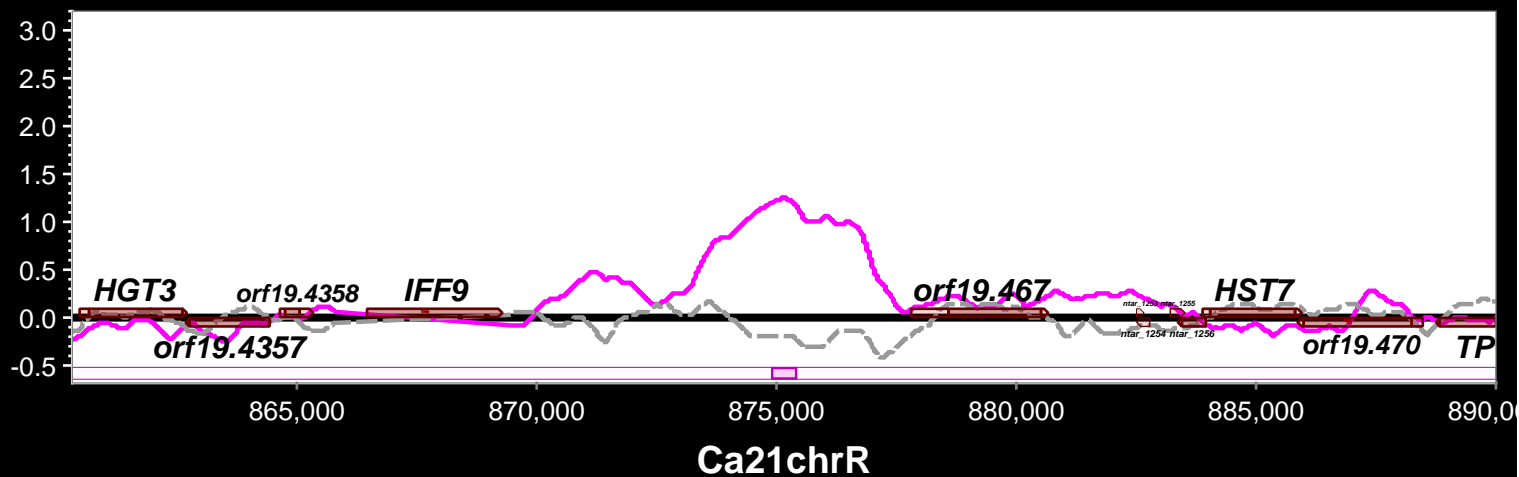

[1.235] Ca21chr1:521505-551188 [+] [tR(UCU)4, orf19.2943.5, DIP5, PUT4, HNM4]

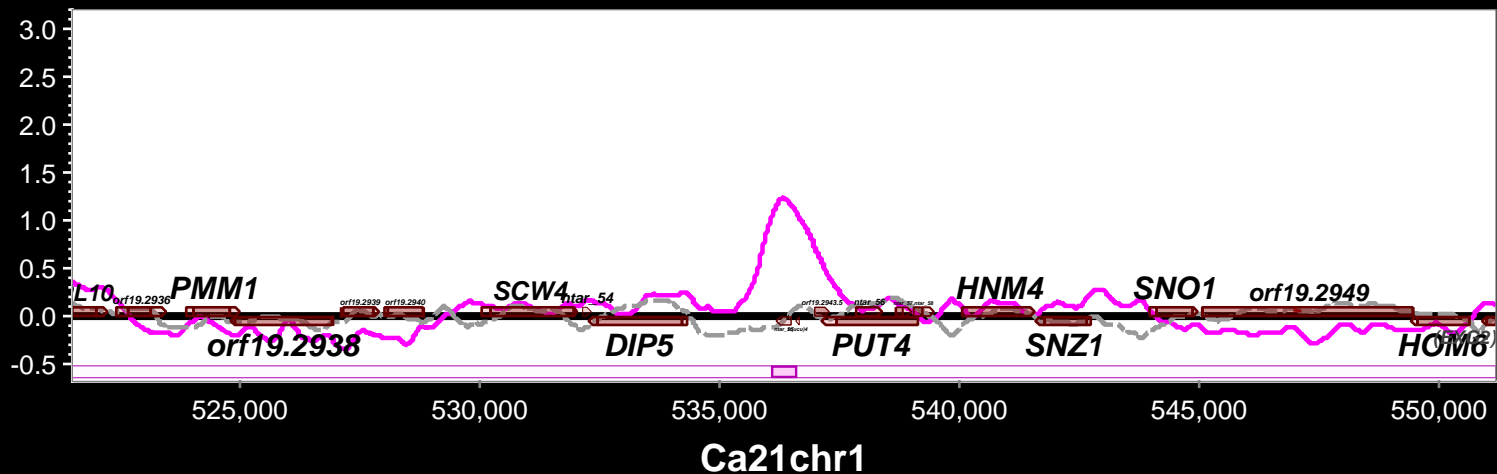

[1.235] Ca21chr1:1929721-1959404 [+] [MSN4, PFK26, orf19.4751.1, orf19.4751, orf19.4750]

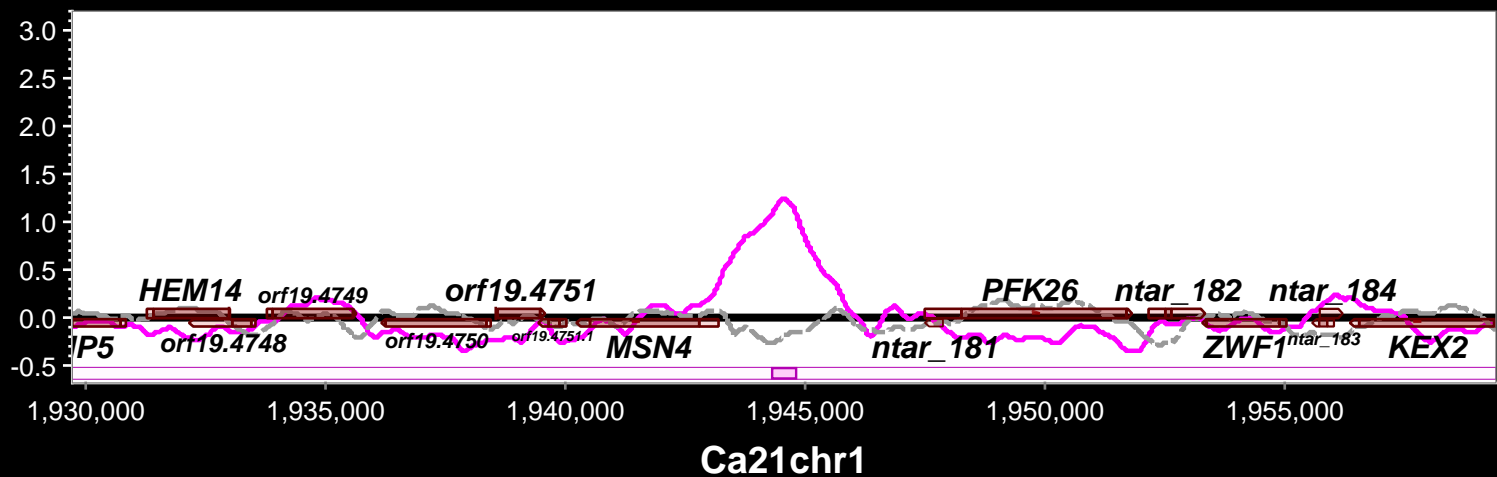

[1.231] Ca21chrR:1297705-1327388 [+] [orf19.3868, RPL7, orf19.3869, RFX1, ADE13]

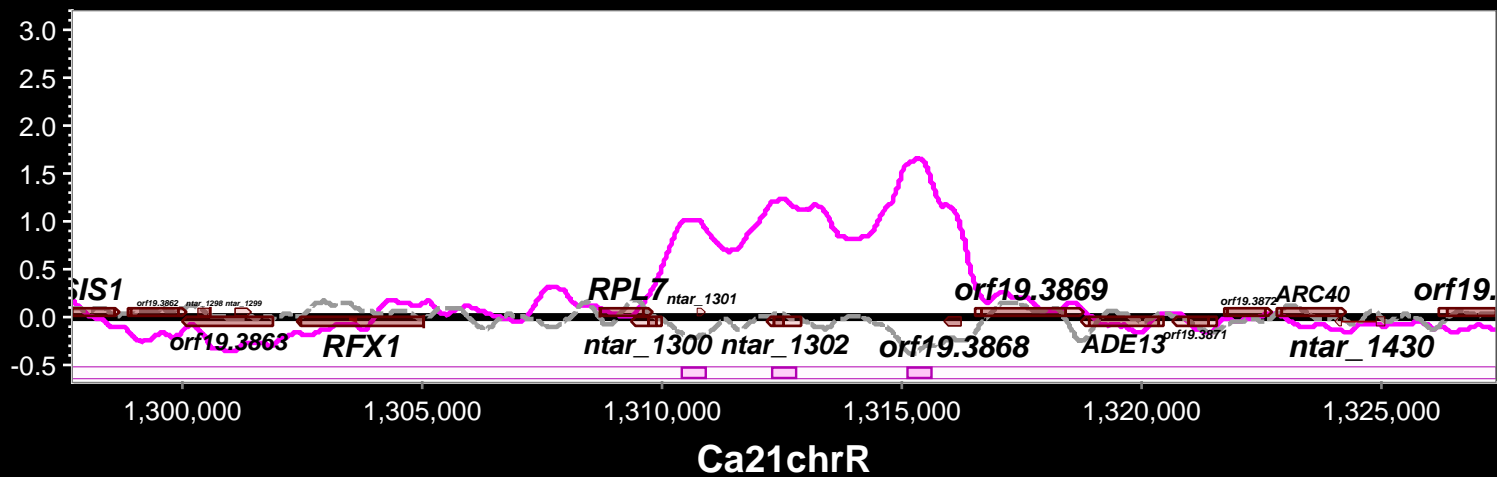

[1.224] Ca21chr2:724290-753973 [+] [ADAEC, orf19.867, orf19.871, RAD32, orf19.872]

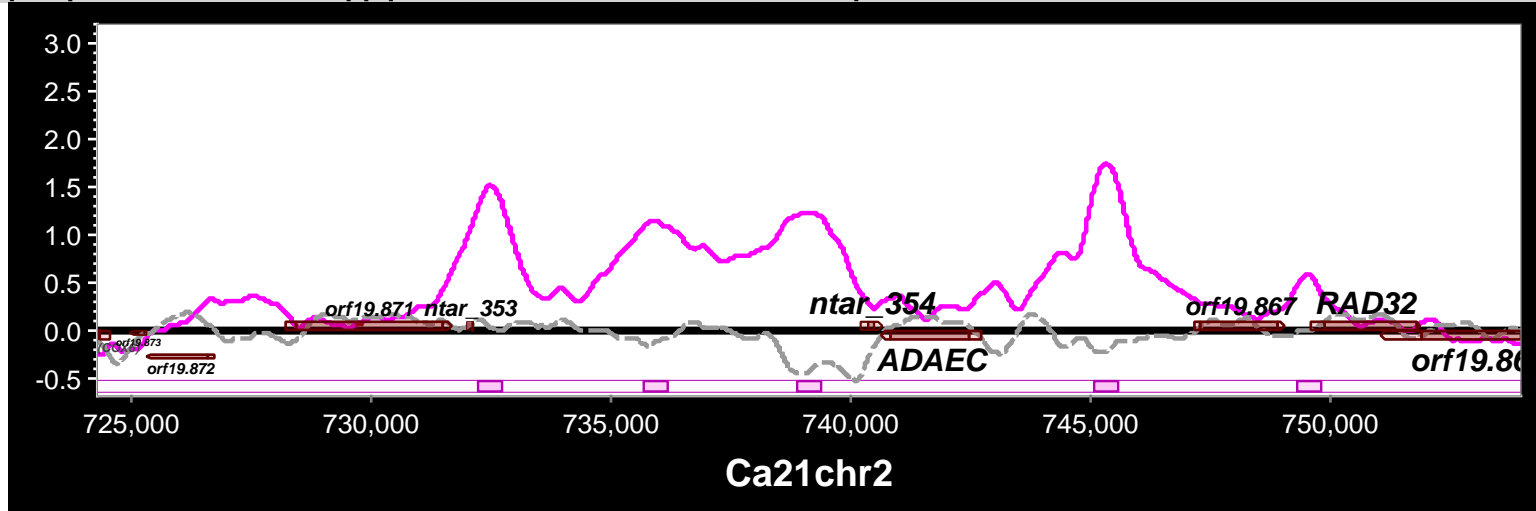

[1.216] Ca21chr1:2210189-2239872 [+] [orf19.4883, WOR1, orf19.4882, orf19.4880, MIR1]

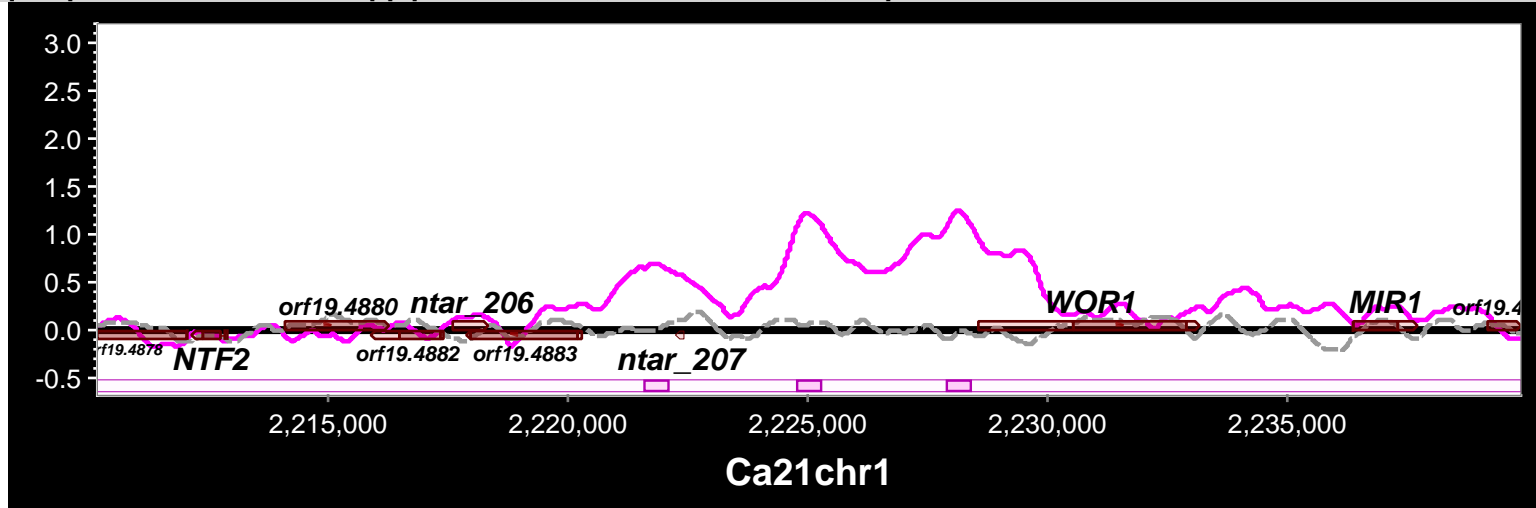

[1.205] Ca21chrR:1514216-1543899 [+] [CRZ2, ALS3, URA2, orf19.1815, orf19.1814]

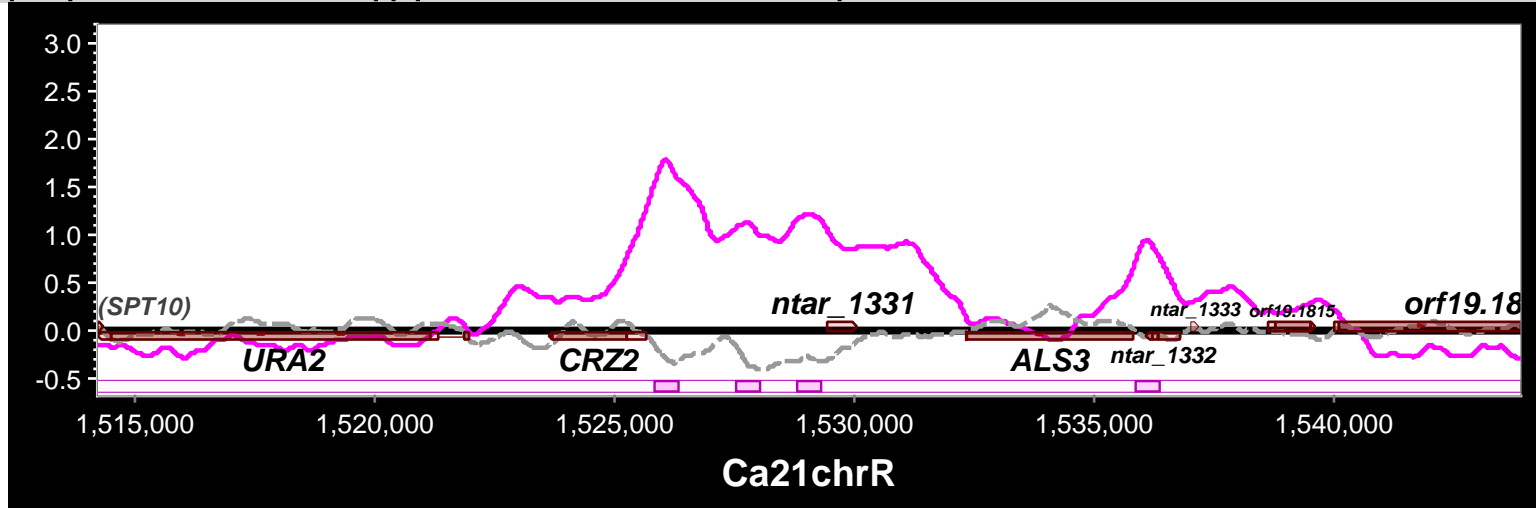

[1.201] Ca21chr1:1308881-1338564 [+] [orf19.1821, UME6, orf19.1823, orf19.177, PGA50]

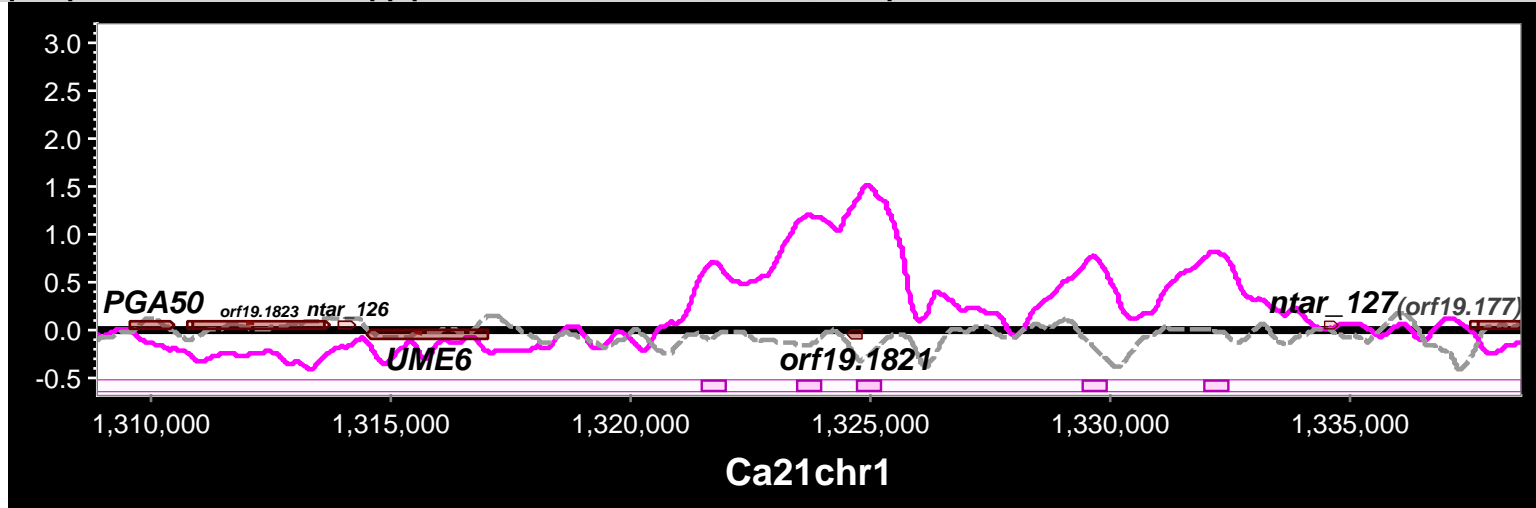

[1.2] Ca21chrR:583753-613436 [+] [RFG1, orf19.2825, orf19.2822, orf19.2821, orf19.2820]

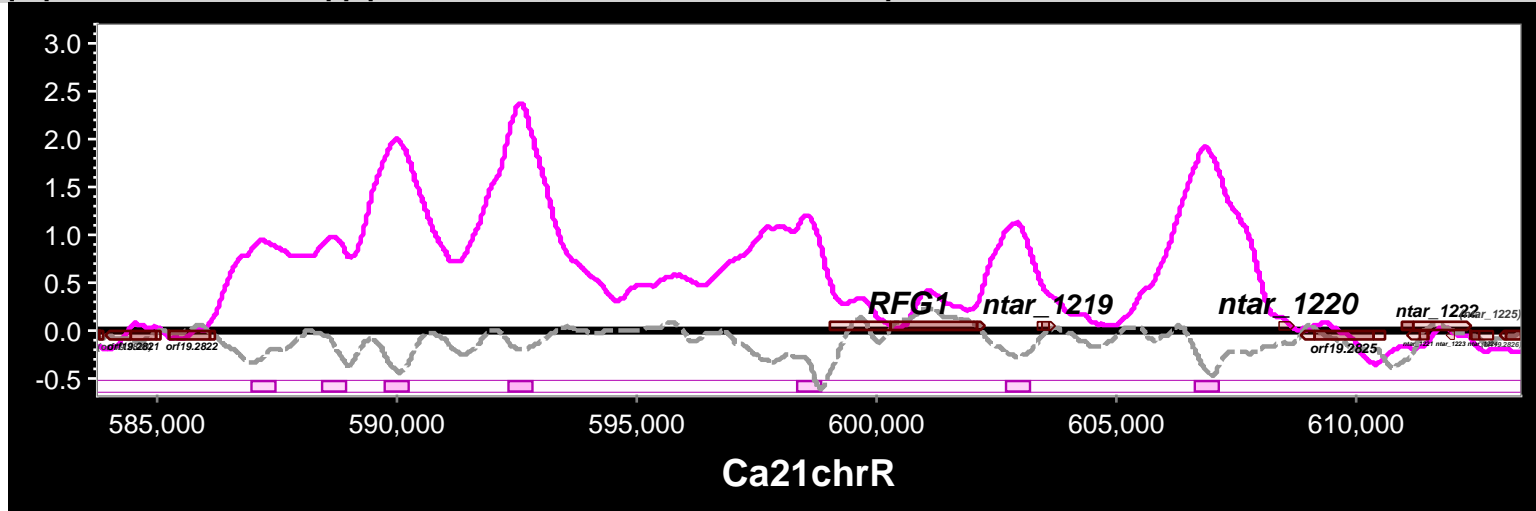

[1.193] Ca21chr3:931781-961464 [+] [ADE2, orf19.5905, RPL19A, TEC1, RAX1]

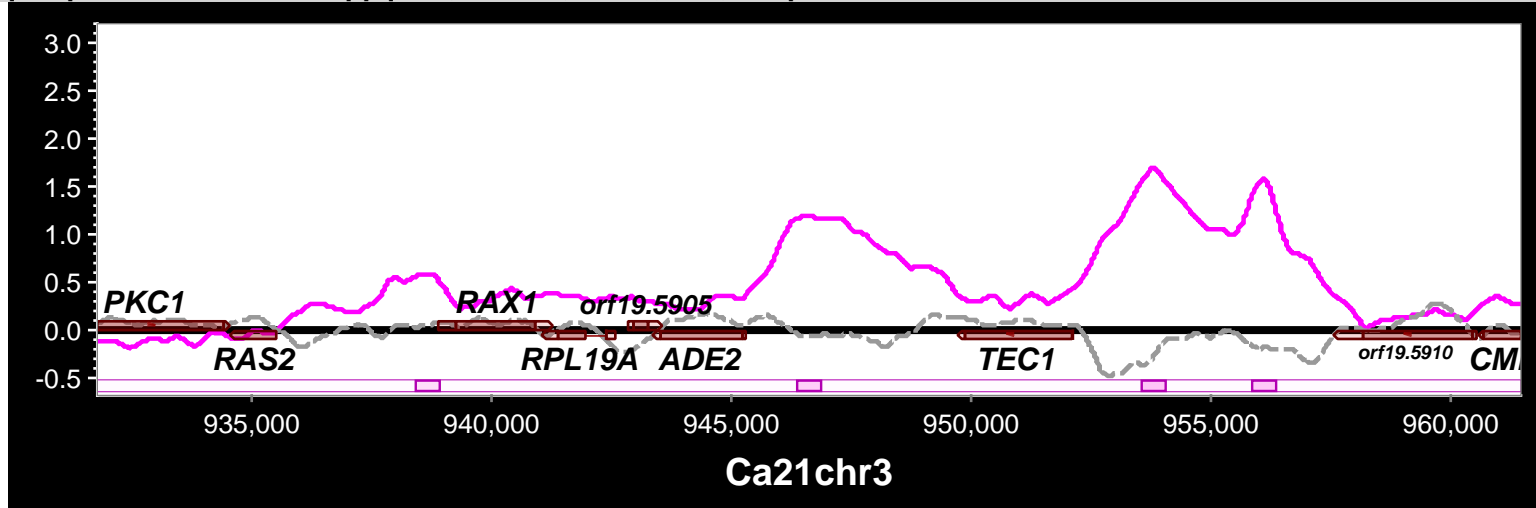

[1.193] Ca21chrR:495320-525003 [+] [PGA23, orf19.3742, PGA22, orf19.3743, orf19.3744]

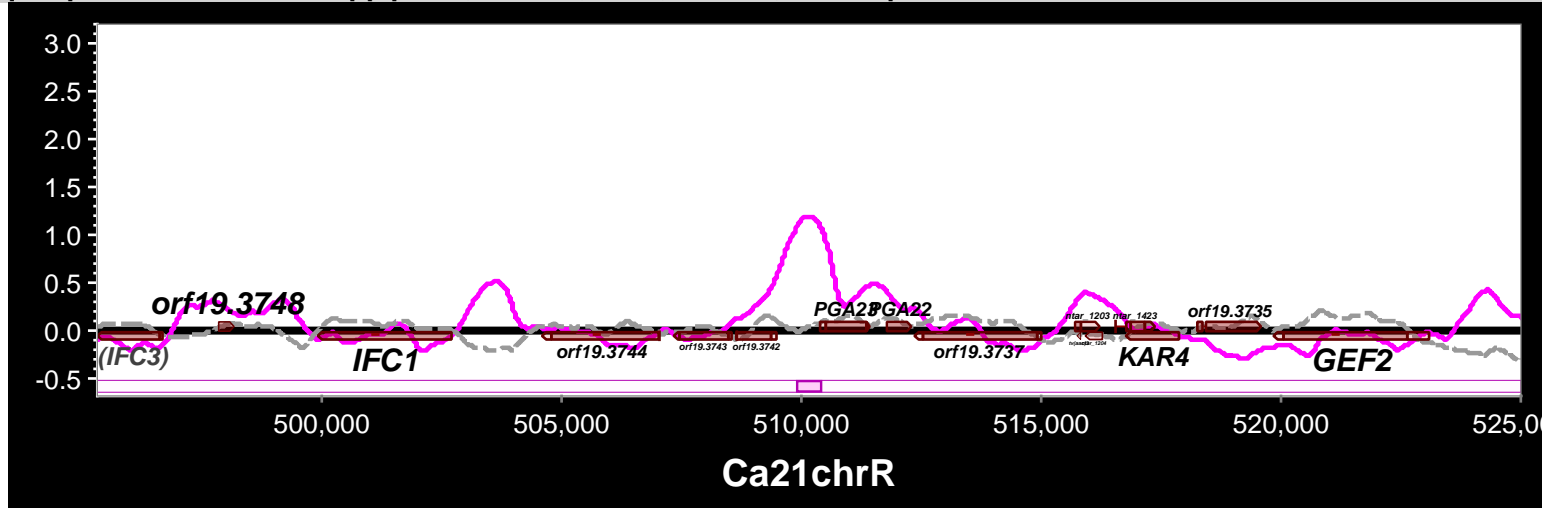

[1.191] Ca21chr6:773790-803473 [+] [ALS1, ALS5, orf19.5735.3, ALS9, CDC50]

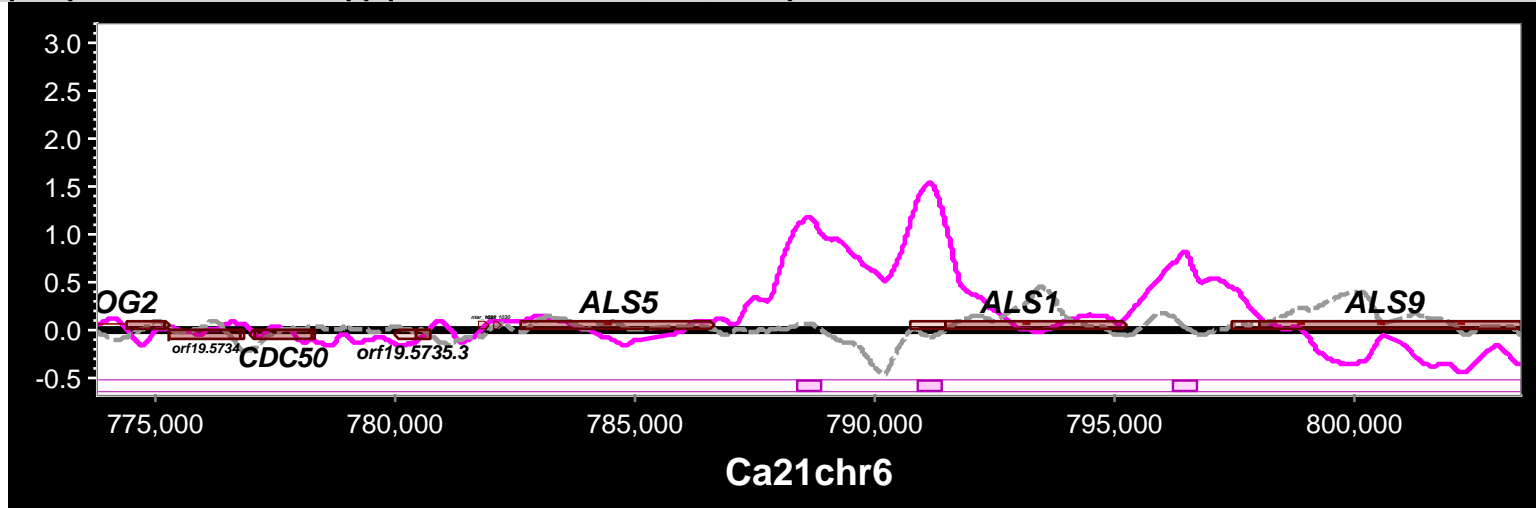

[1.181] Ca21chr1:2426479-2456162 [+] [orf19.2308, orf19.2309, orf19.2307, RPL2, orf19.2306]

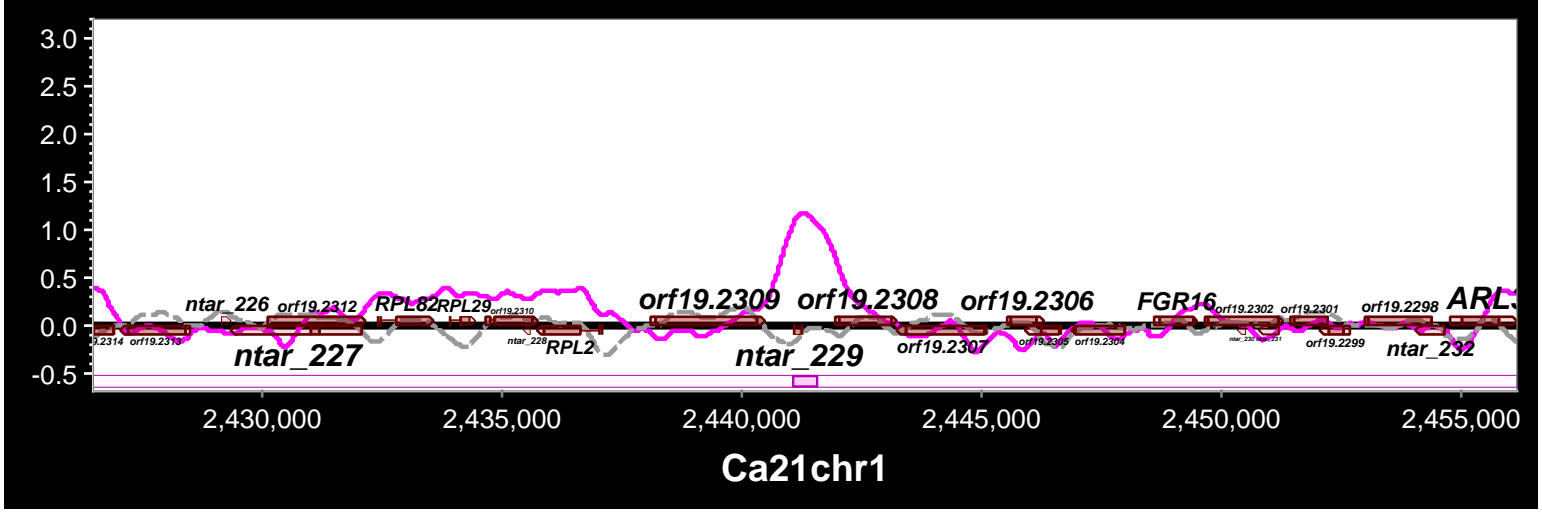

[1.171] Ca21chr4:1293664-1323347 [+] [orf19.1277, orf19.1276, VPS11, GAT1, PGA49]

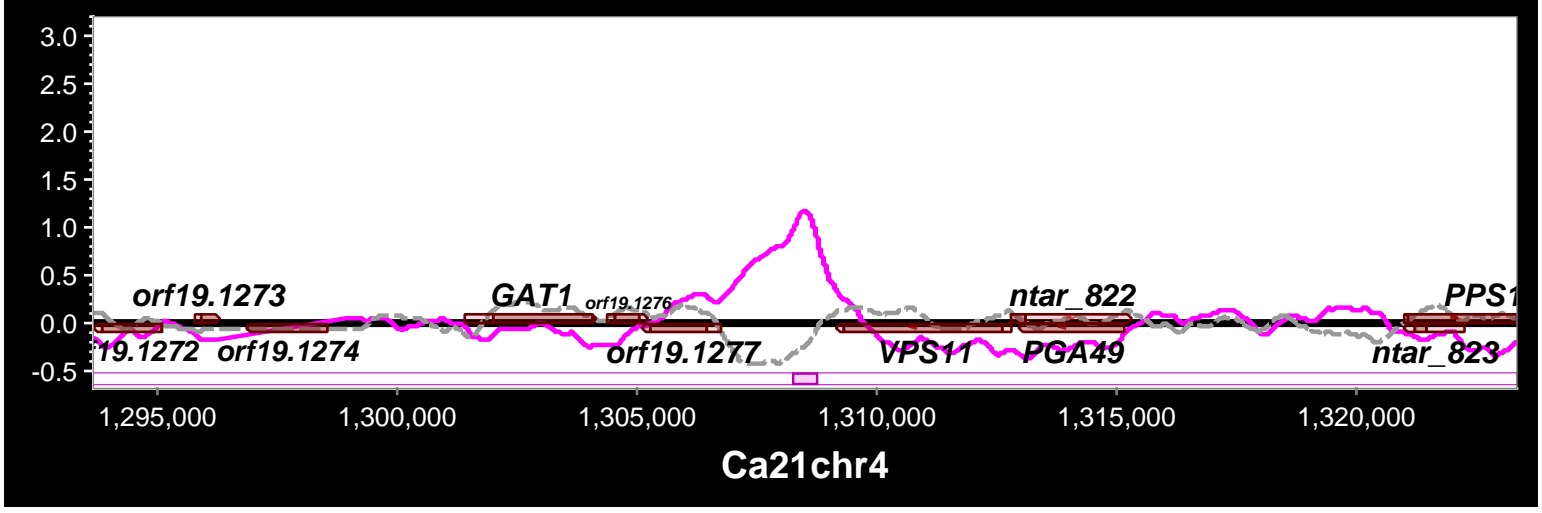

[1.16] Ca21chr6:351428-381111 [+] [FGR37, SUR7, ATG15, orf19.3411, SEC12]

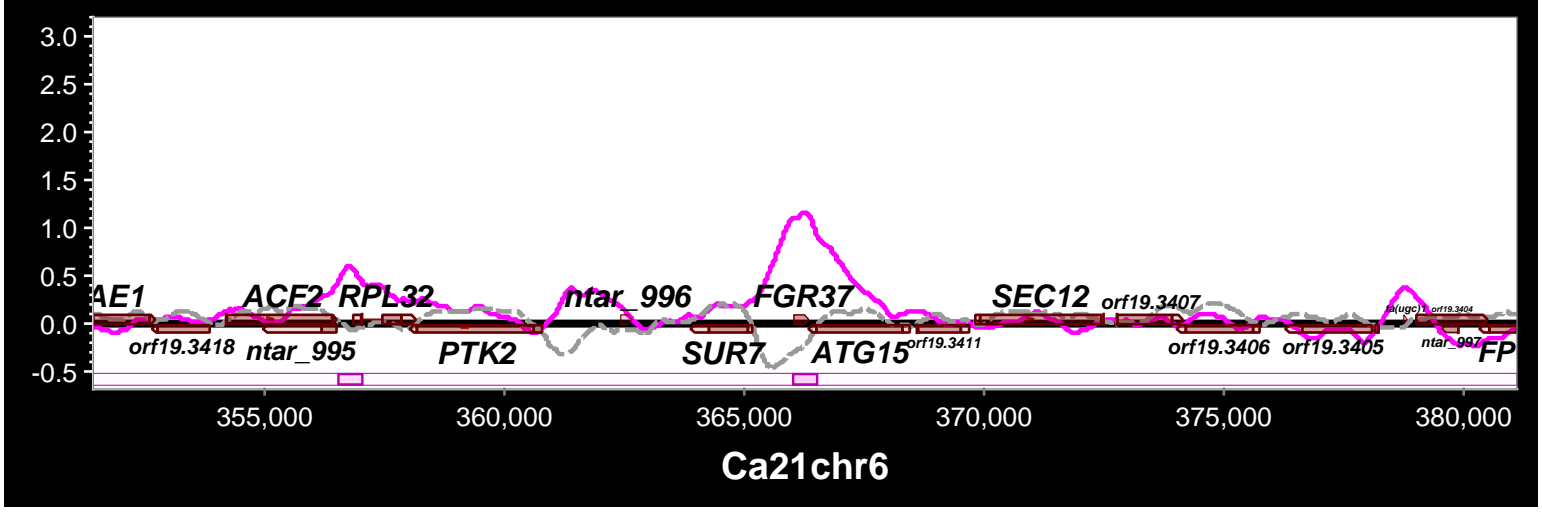

[1.15] Ca21chr1:1073499-1103182 [+] [orf19.450, orf19.449, GAT2, orf19.448, orf19.446.2]

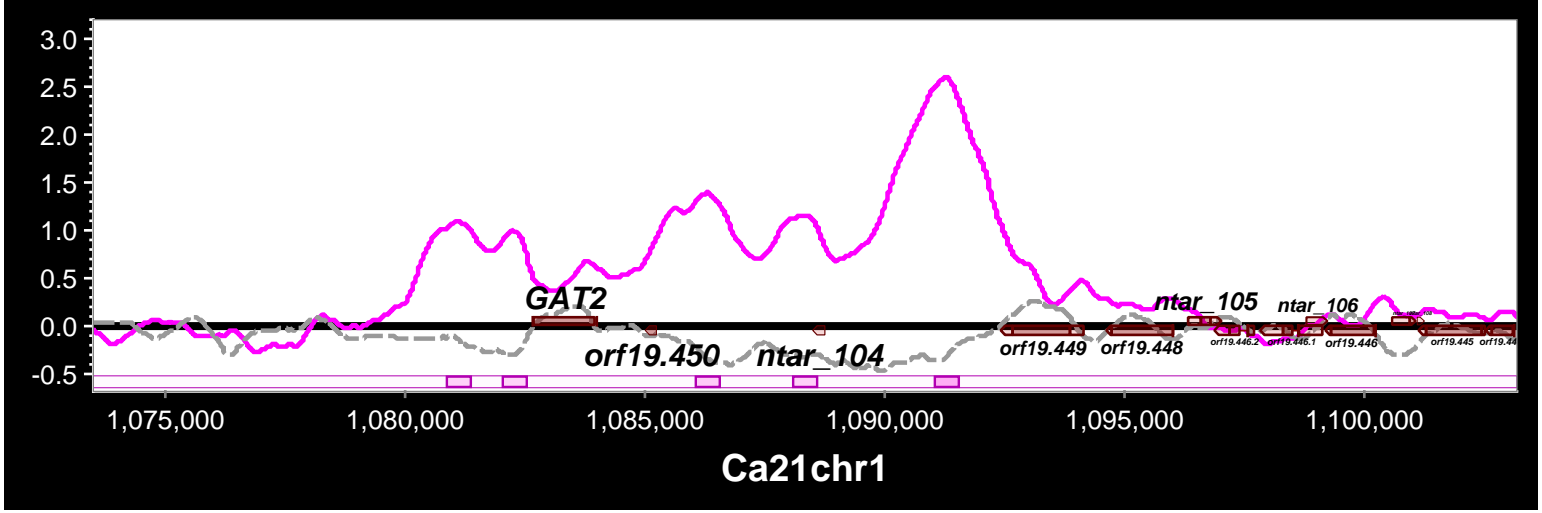



[1.15] Ca21chr2:721091-750774 [+] [ADAEC, orf19.871, orf19.872, orf19.873, orf19.867]

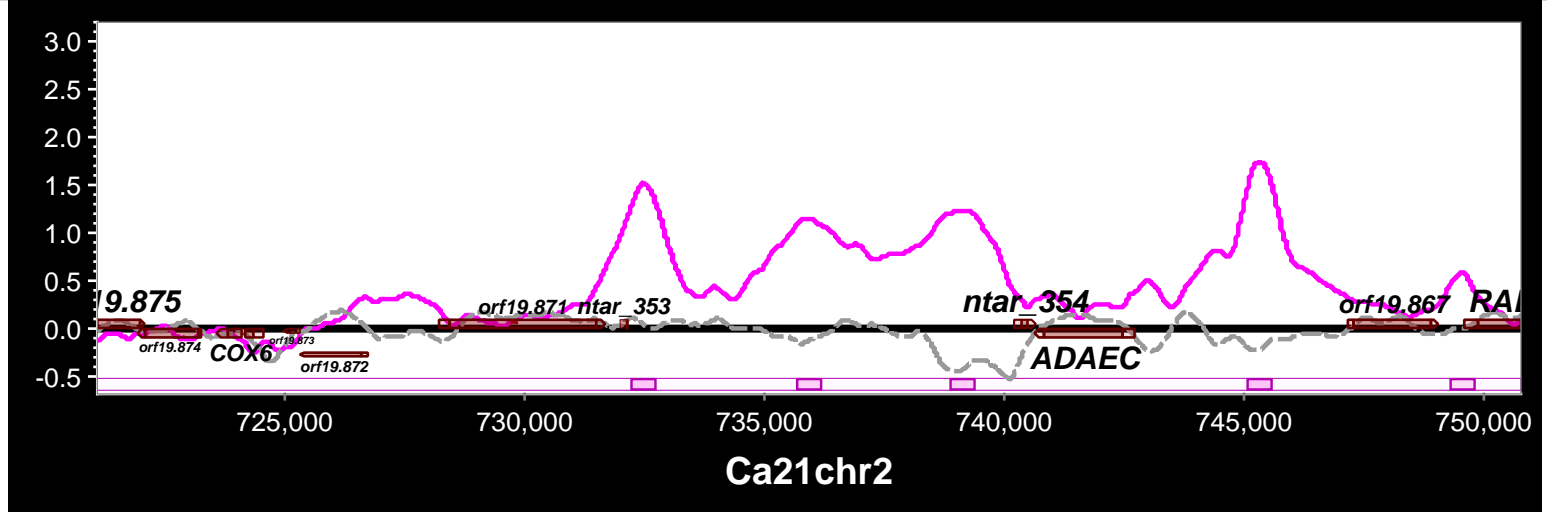

[1.146] Ca21chr2:1580247-1609930 [+] [FLC3, PHO86, orf19.2200, orf19.2197, orf19.2201]

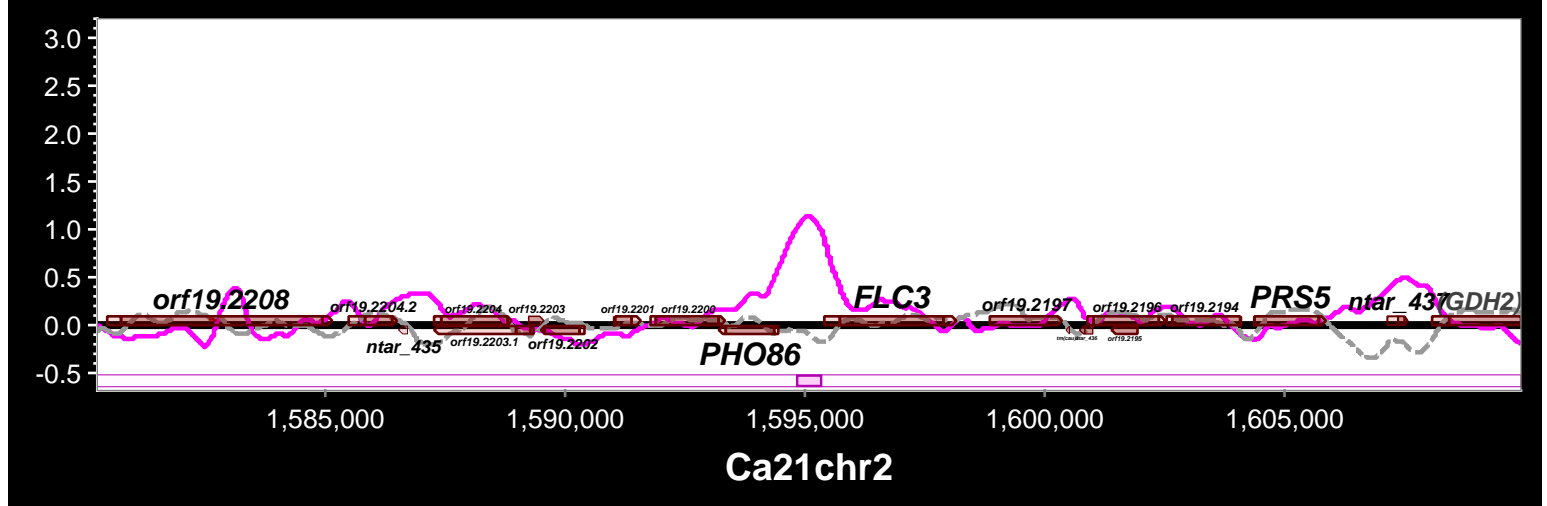

[1.146] Ca21chr7:894541-924224 [+] [orf19.7152, orf19.7153, UTP18, orf19.7151, FAA2-3]

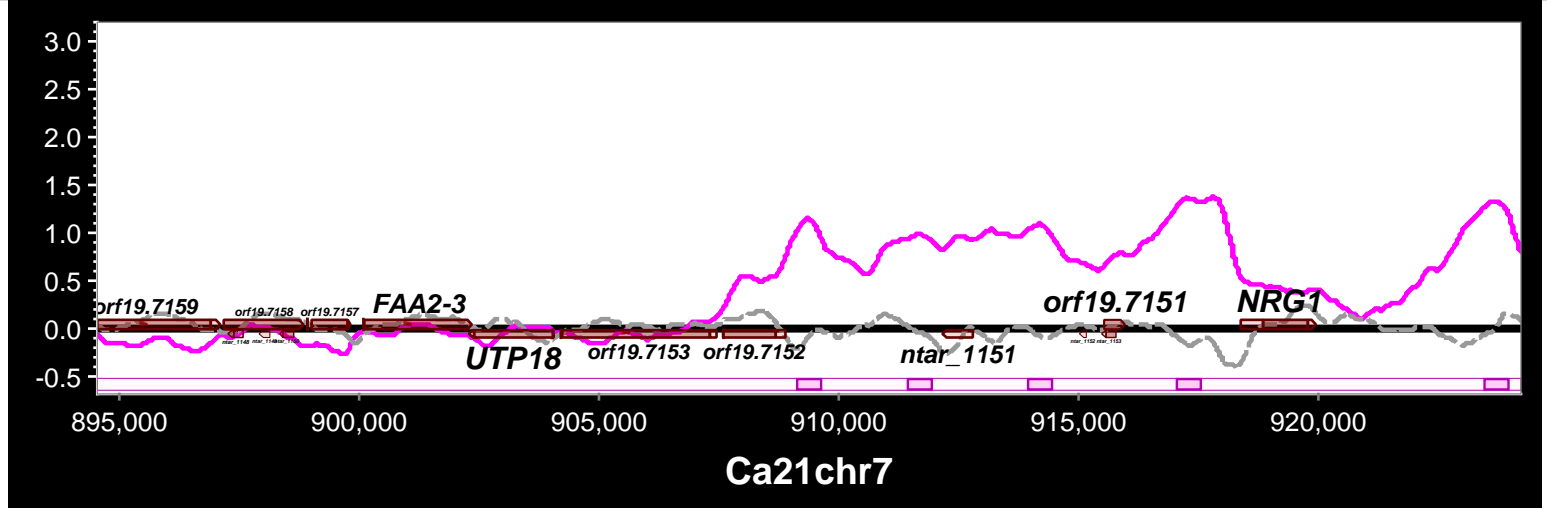

[1.146] Ca21chrR:1-29684 [+] [INO2, orf19.7538, BNR1, orf19.7539.1, tL(CAA)6]

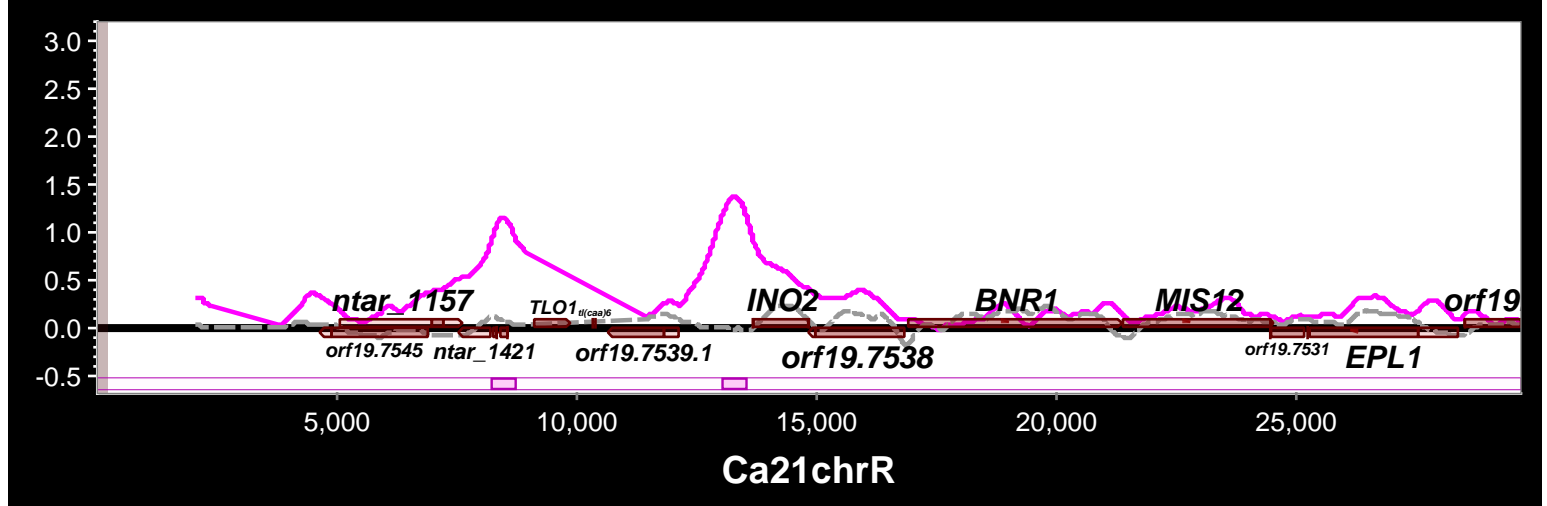

[1.145] Ca21chr2:2008408-2038091 [+] [SMM1, orf19.1363, orf19.1361, orf19.1360.1, orf19.1360]

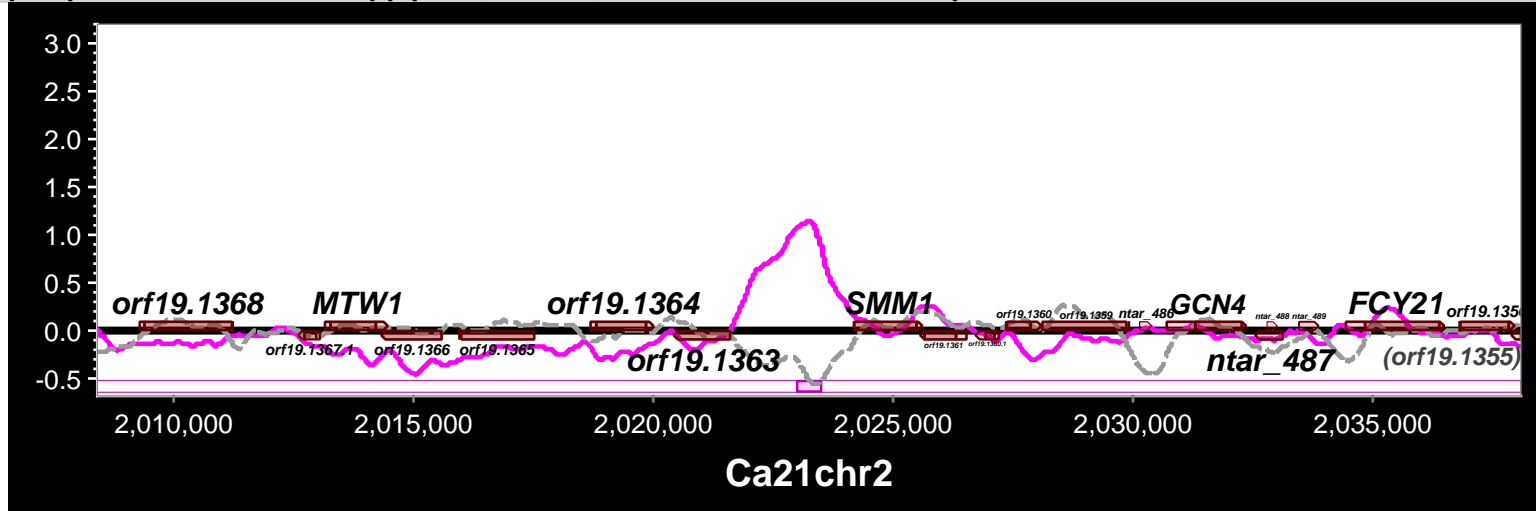

[1.138] Ca21chrR:588108-617791 [+] [RFG1, orf19.2825, orf19.2826, orf19.2827]

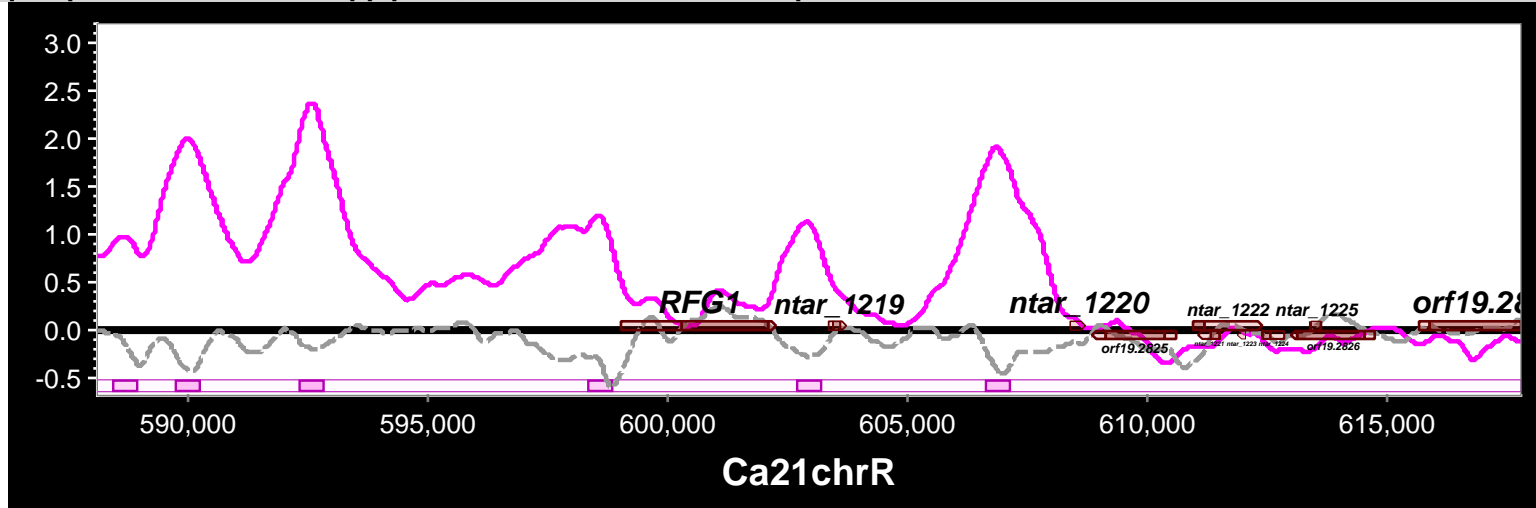

[1.129] Ca21chrR:1512943-1542626 [+] [CRZ2, URA2, ALS3, orf19.1815, orf19.1814]

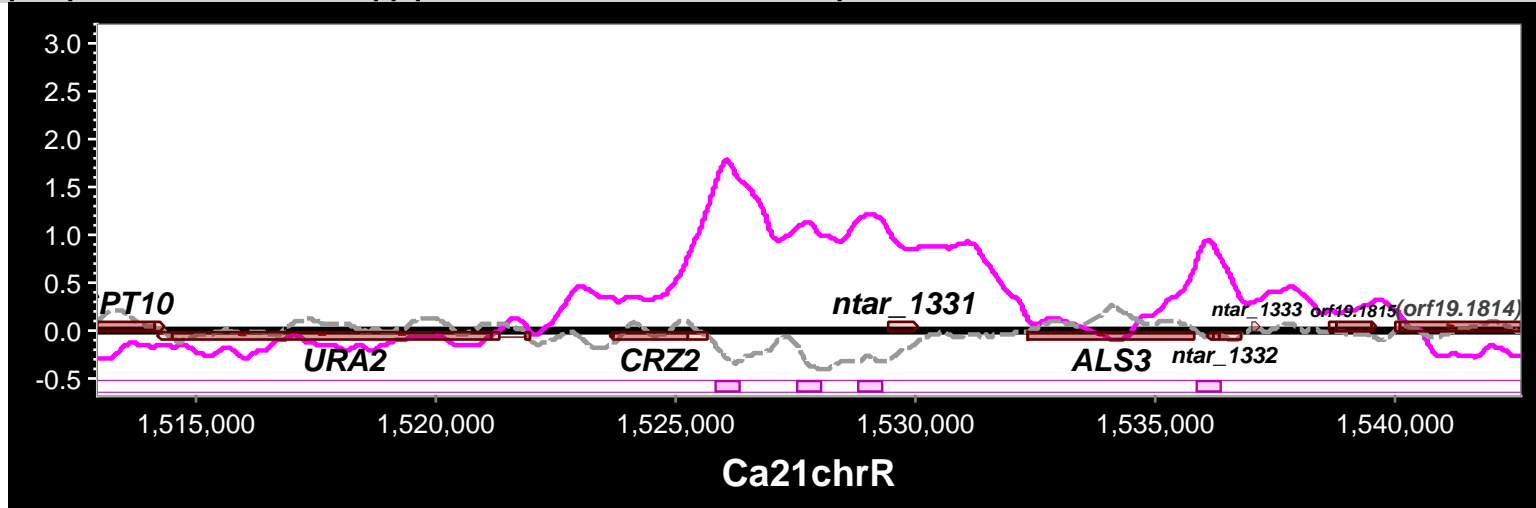

[1.121] Ca21chr1:1031951-1061634 [+] [orf19.53, RHD1, orf19.52, orf19.55, ARG2]

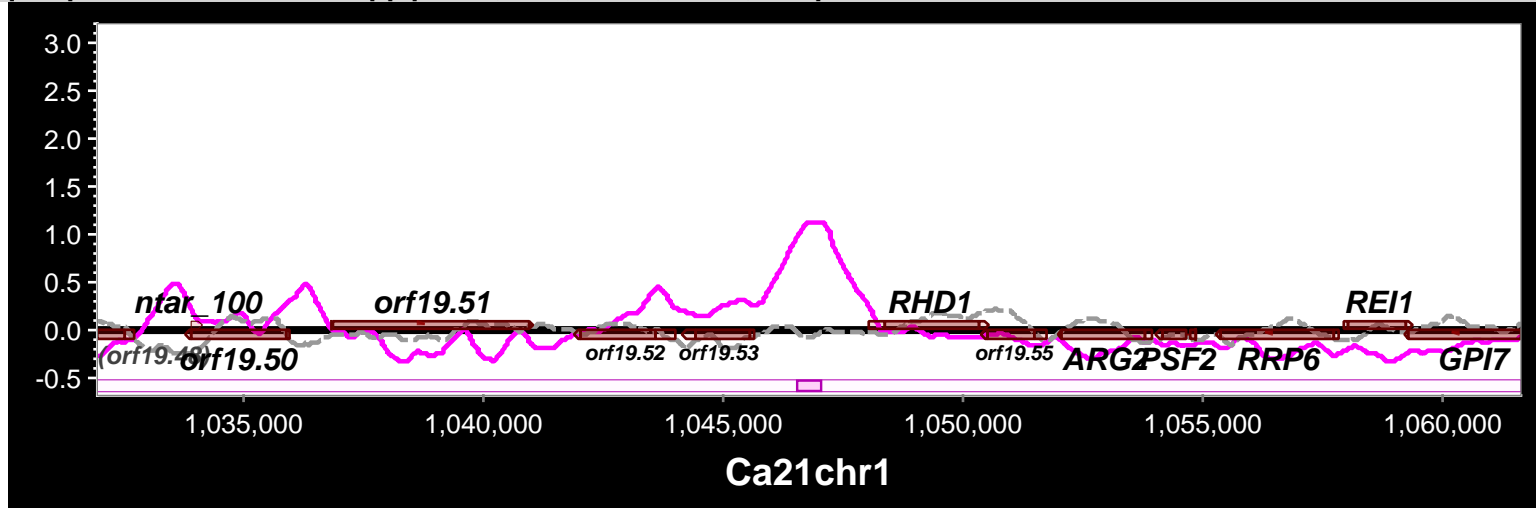

[1.118] Ca21chr3:1430521-1460204 [+] [ALS7, ISW2, TSA1B, HNT2, orf19.7420]

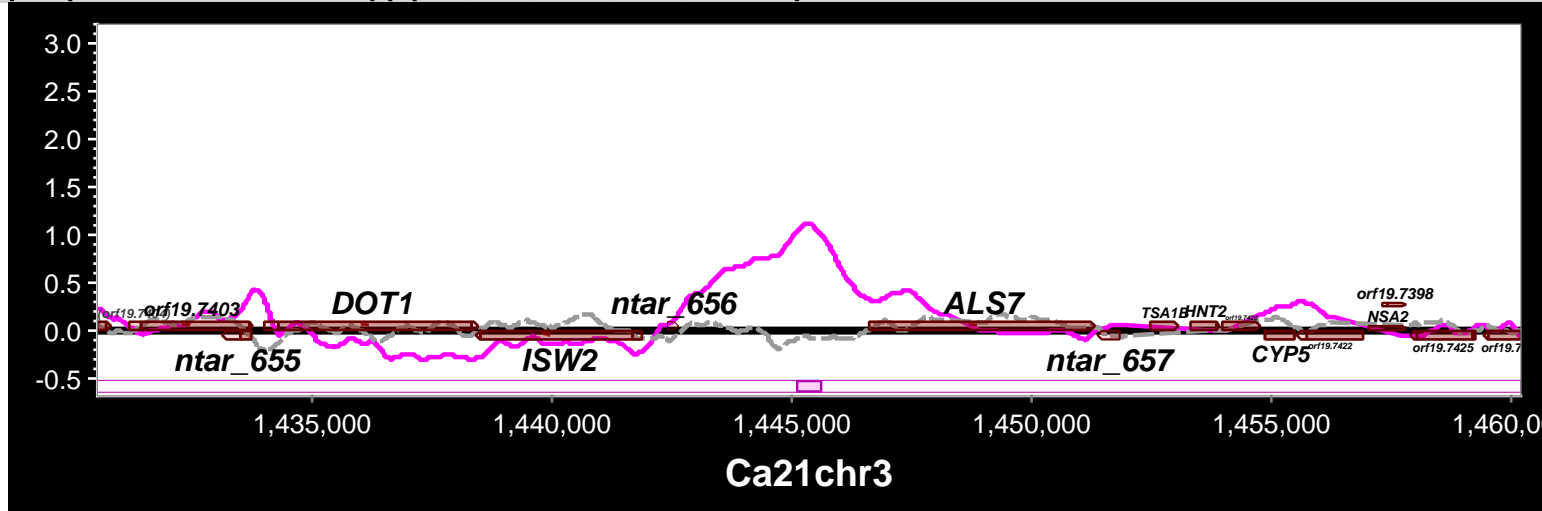

[1.116] Ca21chr4:4136-33819 [+] [RBT5, PGA7, FRP1, orf19.5633, HIS4]

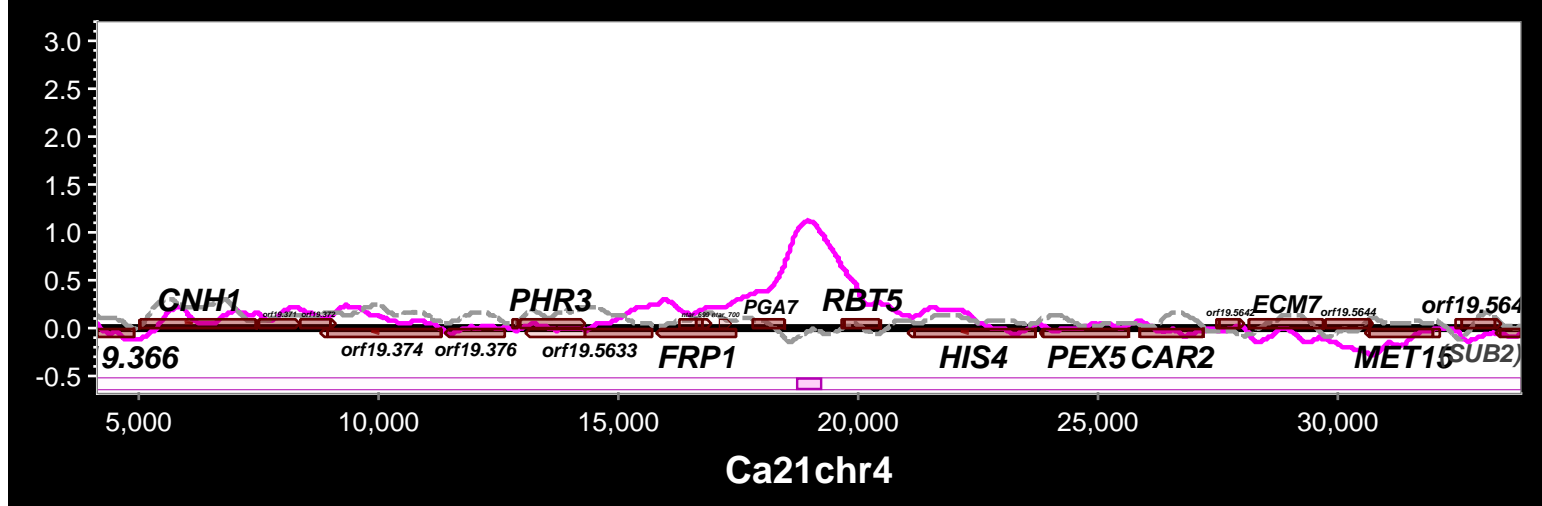

[1.115] Ca21chrR:1357238-1386921 [+] [BCR1, orf19.725, orf19.721, PPZ1, GST3]

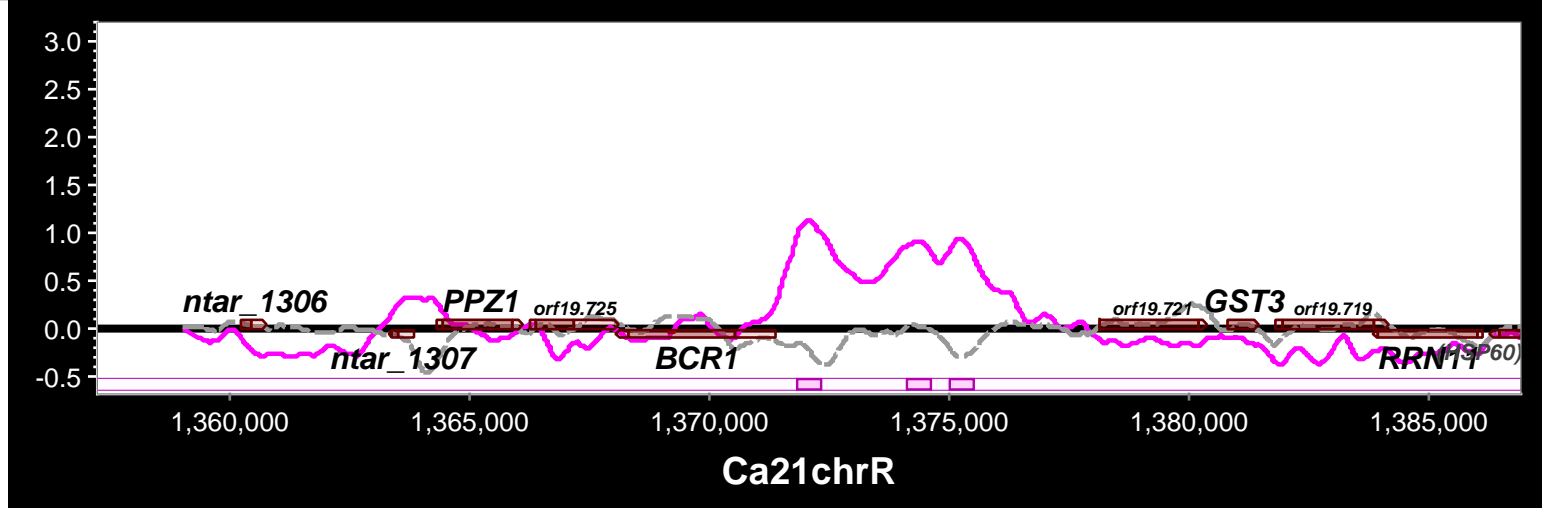

[1.111] Ca21chr3:560973-590656 [+] [orf19.258, orf19.259, orf19.257, orf19.255, SLD1]

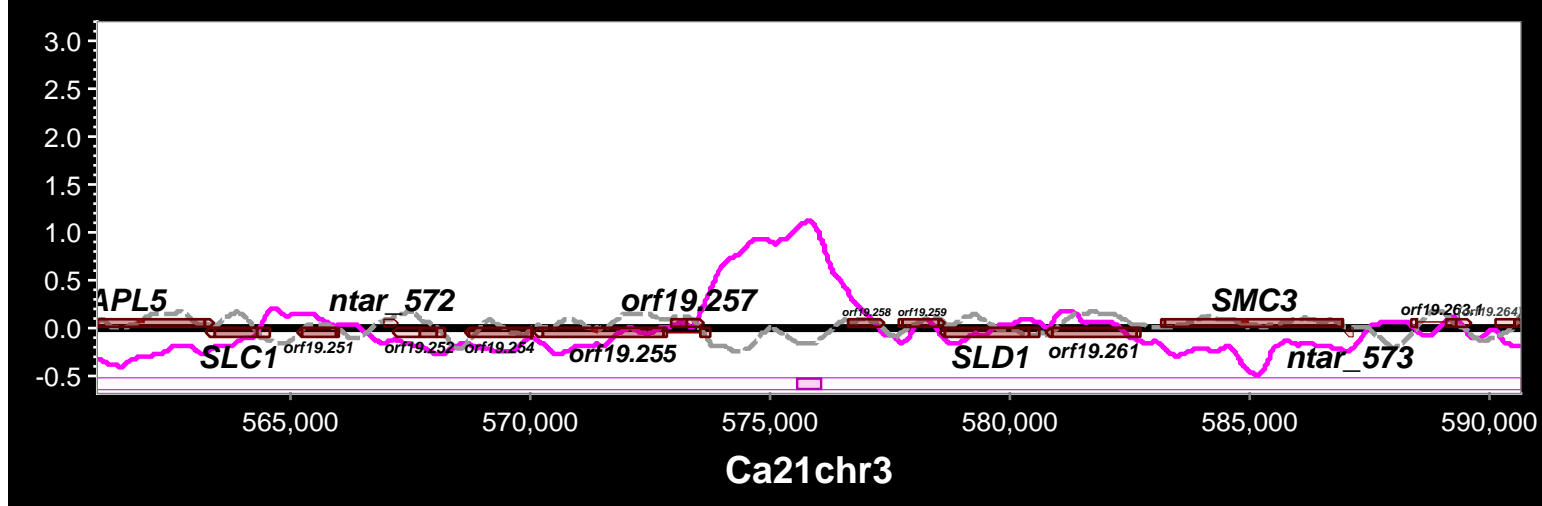

[1.107] Ca21chr4:1410824-1440507 [+] [orf19.2892, orf19.2893, VMA8, orf19.2891, SOU1]

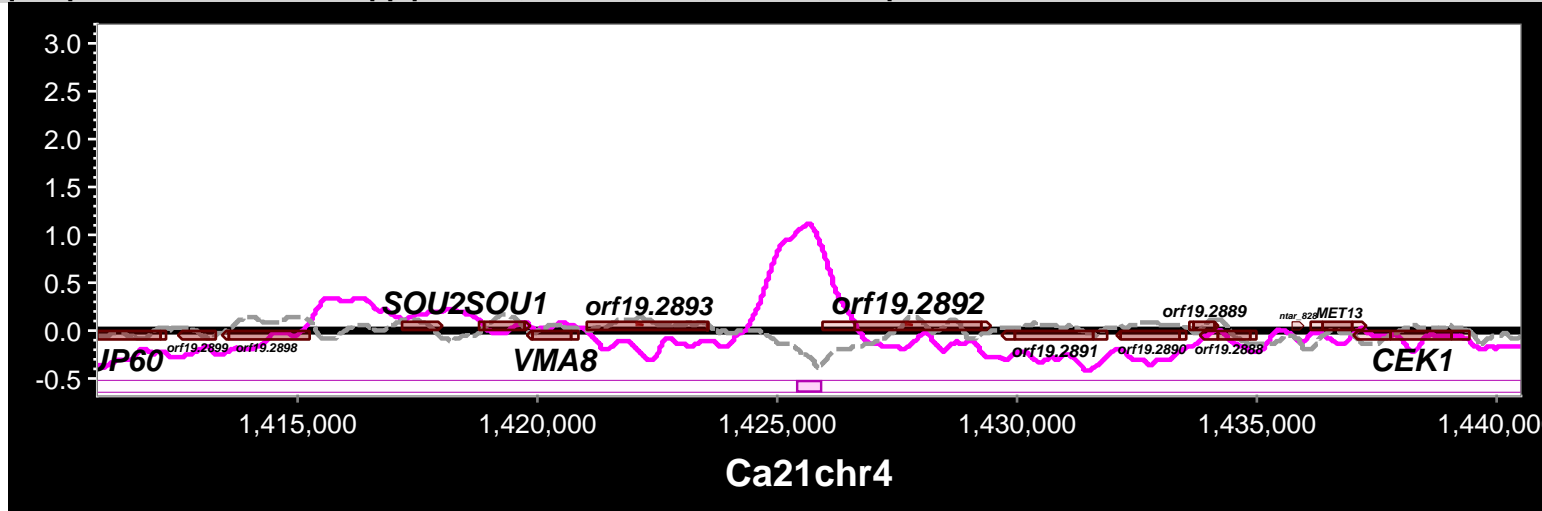

[1.102] Ca21chr3:693356-723039 [+] [orf19.334, FCY2, tE(UUC)1, orf19.332.1, orf19.335]

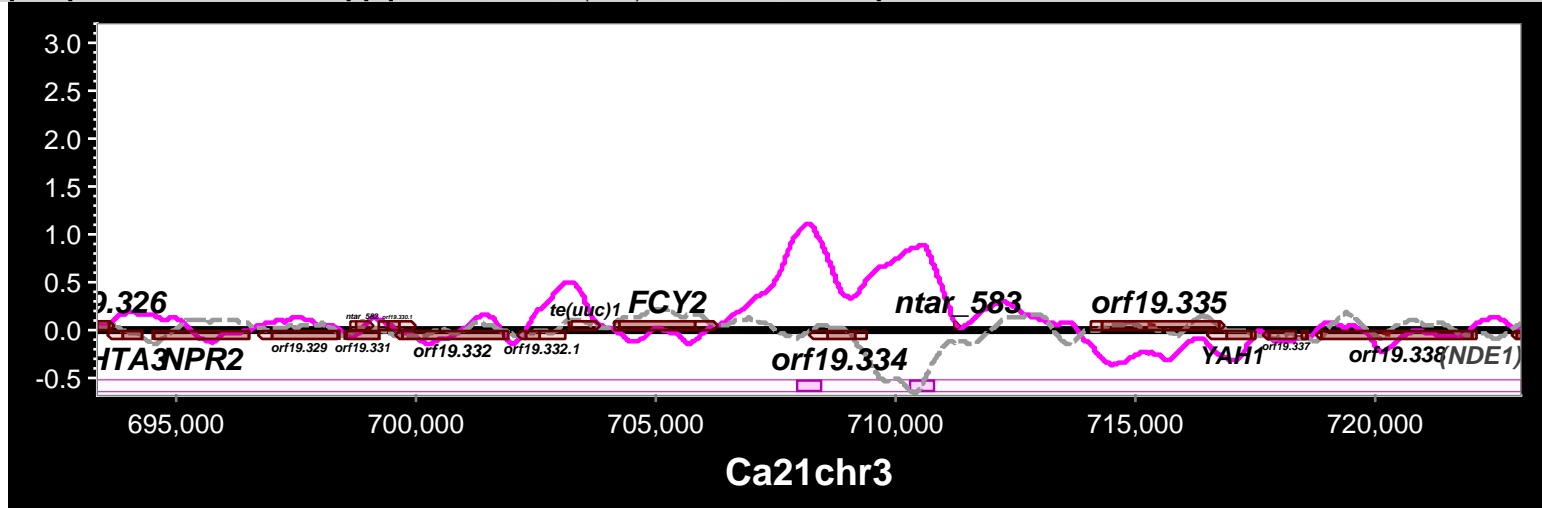

[1.096] Ca21chrR:2145893-2175576 [+] [CHT3, INO1, orf19.7588, orf19.7589, orf19.7590]

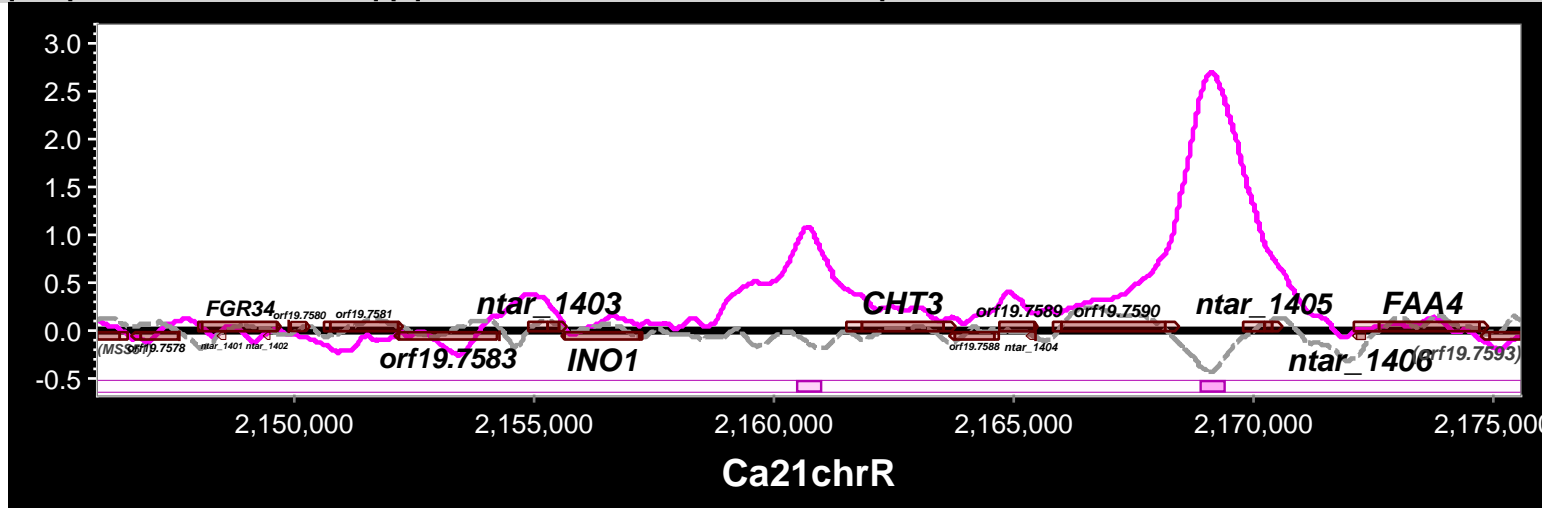

[1.091] Ca21chr1:1066279-1095962 [+] [GAT2, orf19.450, orf19.4057, orf19.4059, ARO4]

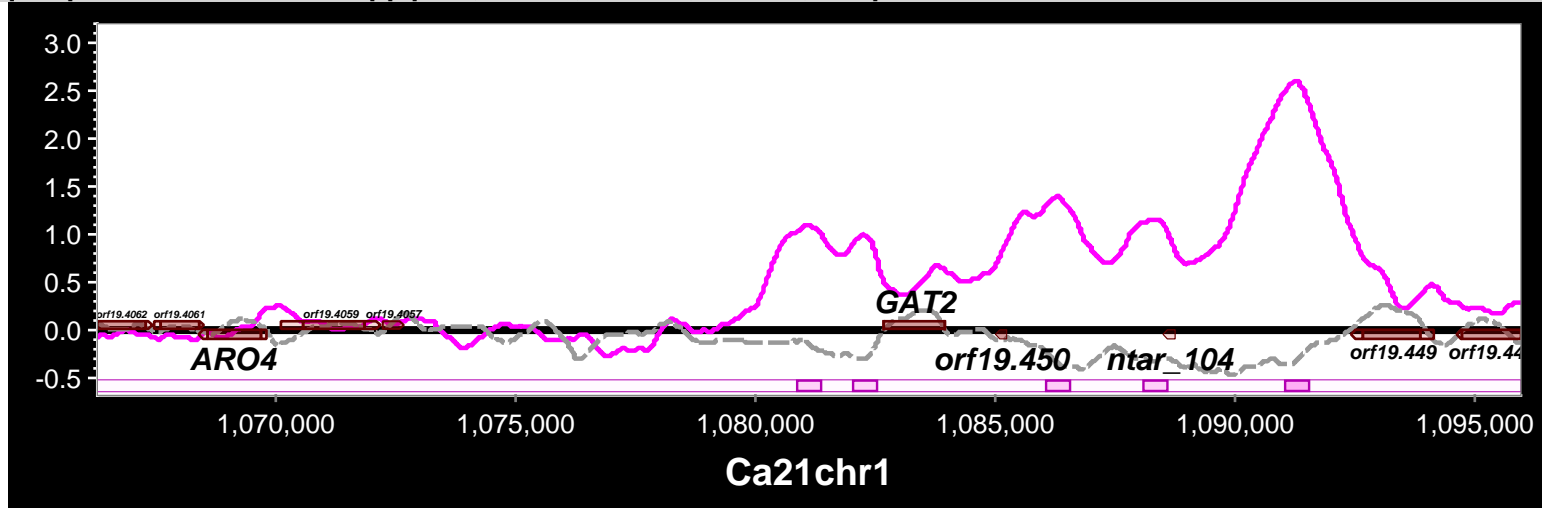

[1.086] Ca21chr7:899356-929039 [+] [orf19.7151, NRG1, orf19.7152, orf19.7153, UTP18]

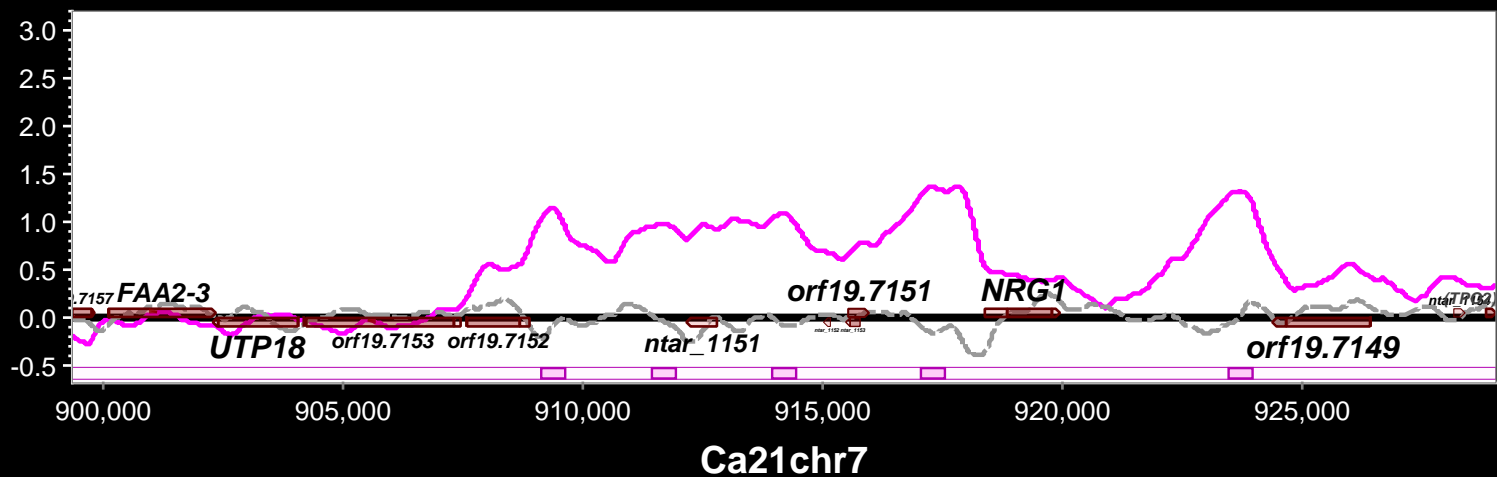

[1.08] Ca21chr1:380391-410074 [+] [orf19.4531, orf19.4532, orf19.4533, orf19.4534, orf19.4530.1]

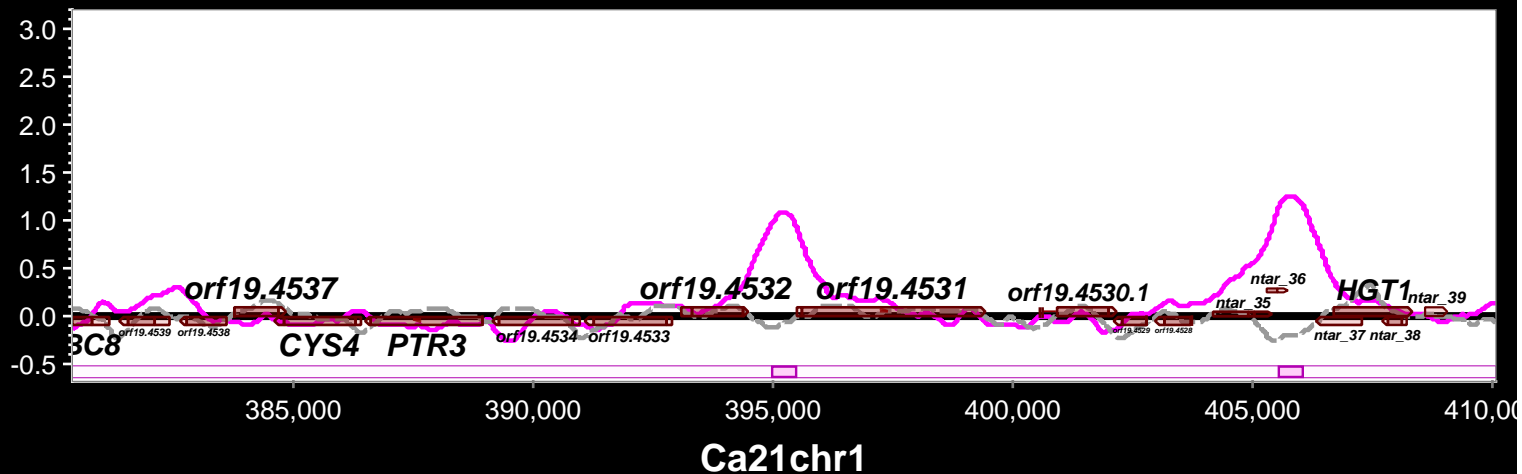

[1.079] Ca21chr4:1032052-1061735 [+] [orf19.3793, CSR1, orf19.3792, AGP3, FGR10]

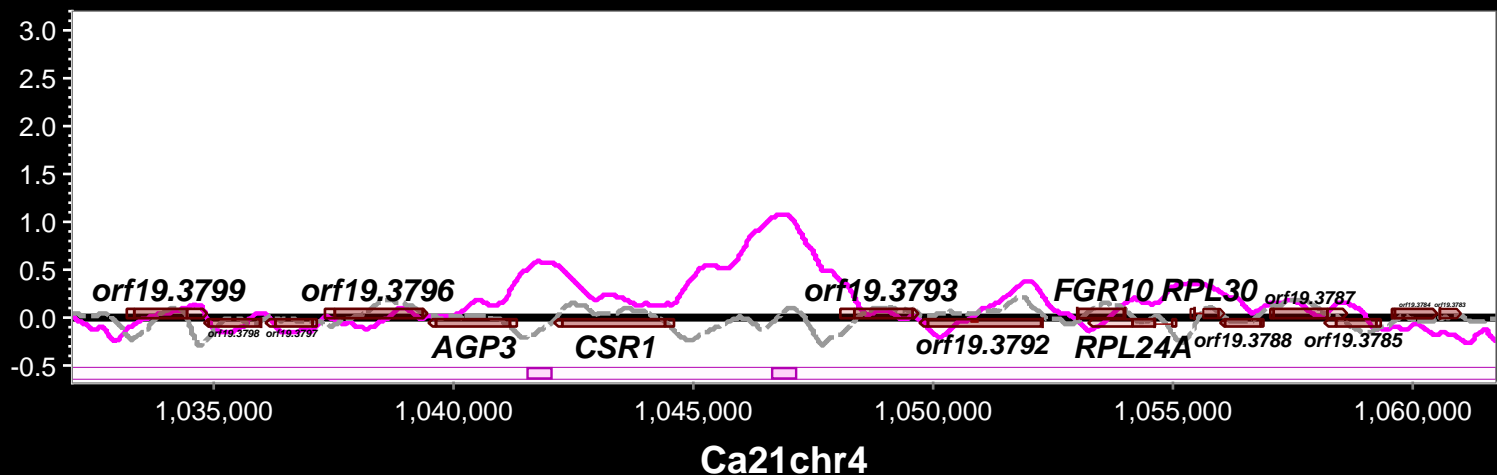

[1.074] Ca21chr5:881951-911634 [+] [orf19.1286, orf19.1285, orf19.1287, FGR42, MEC1]

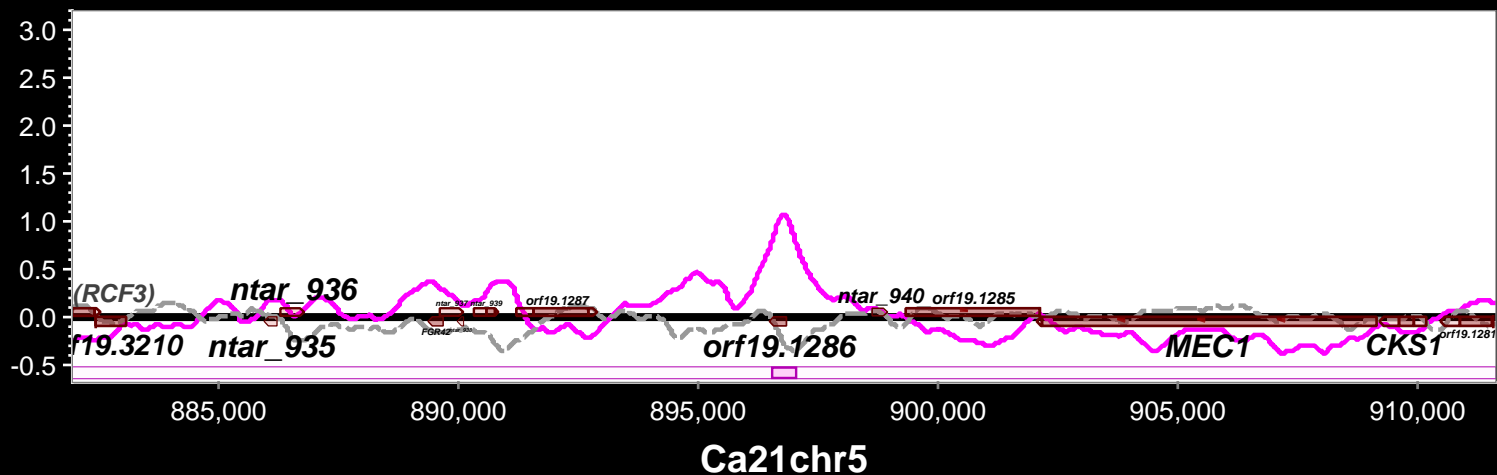

[1.073] Ca21chr3:969136-998819 [+] [orf19.5924, orf19.5921, orf19.5920, orf19.5925, ARG11]

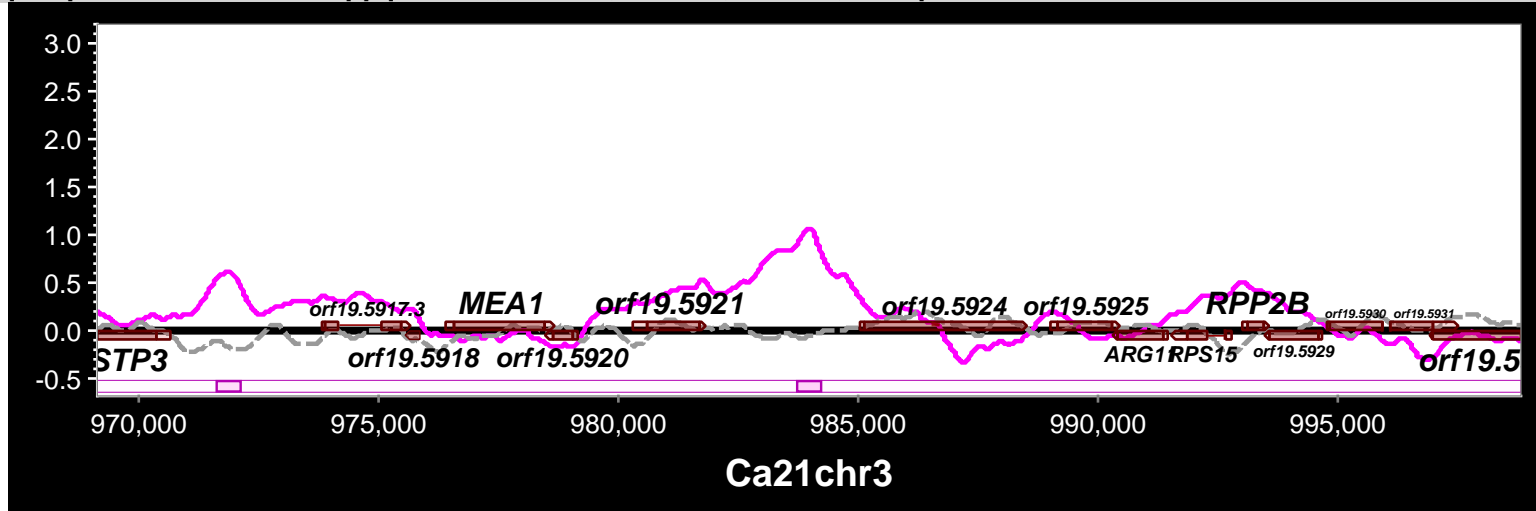

[1.07] Ca21chr4:1510721-1540404 [+] [CCT6, orf19.3125, CZF1, orf19.3124, orf19.3123.2]

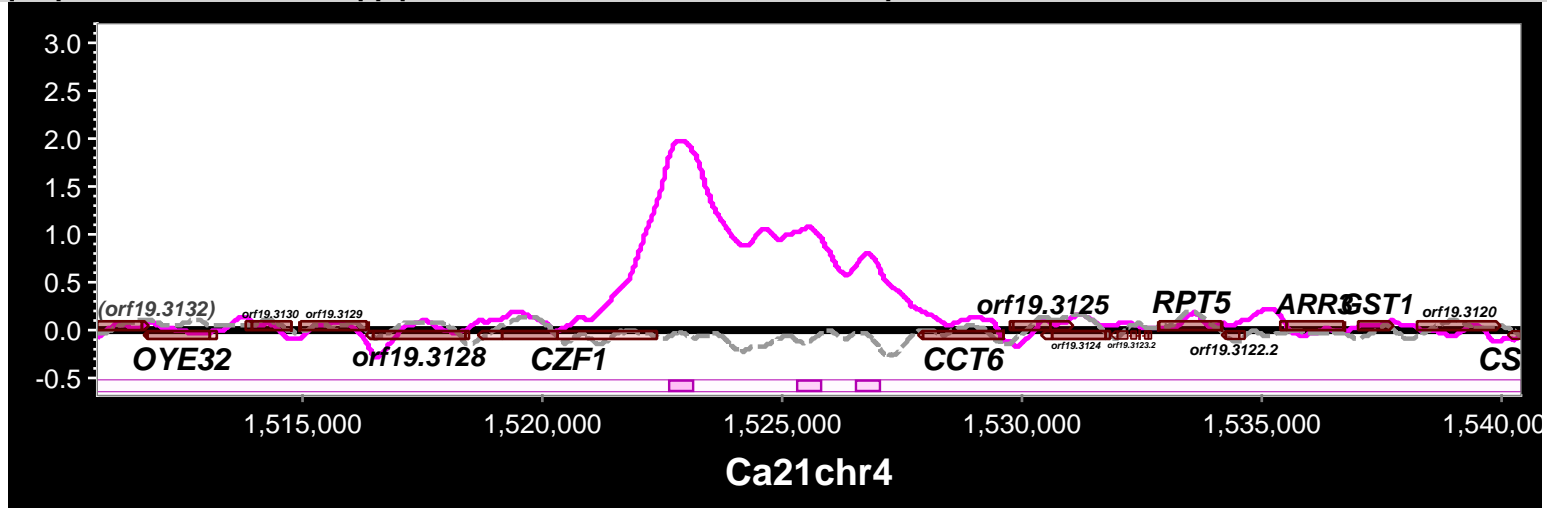

[1.068] Ca21chr1:287647-317330 [+] [orf19.3338, orf19.3337, SOD2, orf19.3341, orf19.3342]

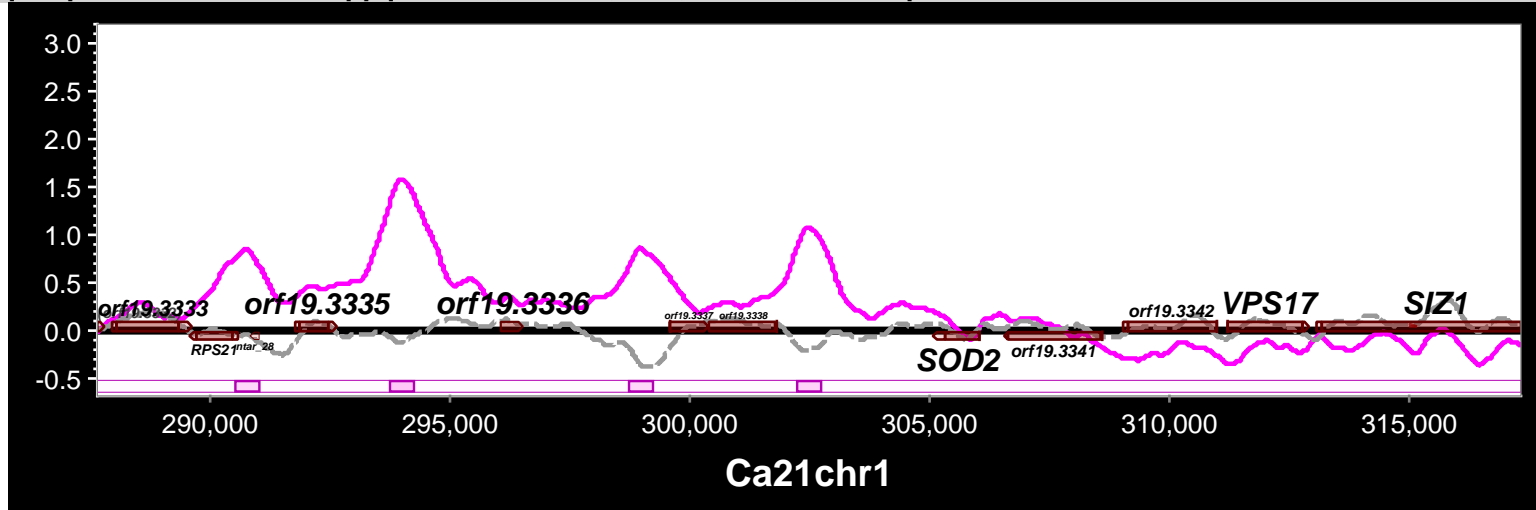

[1.066] Ca21chr5:400911-430594 [+] [HAL9, TAC1, STI1, FCR3, ZNC1]

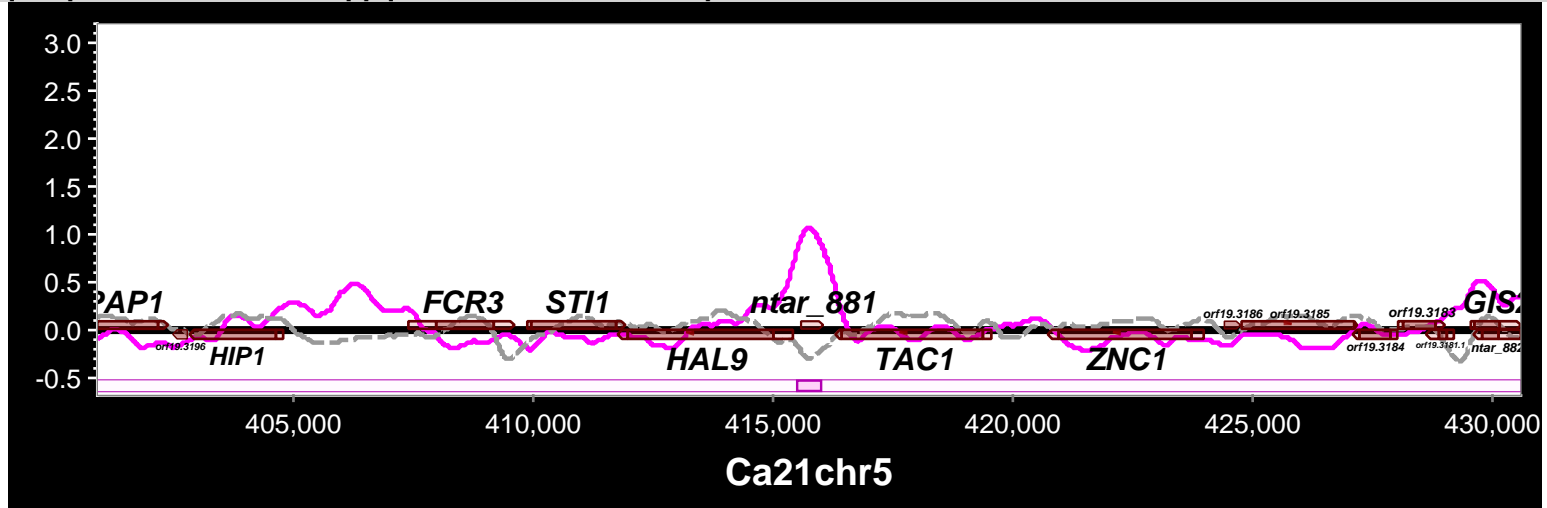

[1.062] Ca21chrR:2090794-2120477 [+] [DEF1, YTA6, FGR46, orf19.7556, BET2]

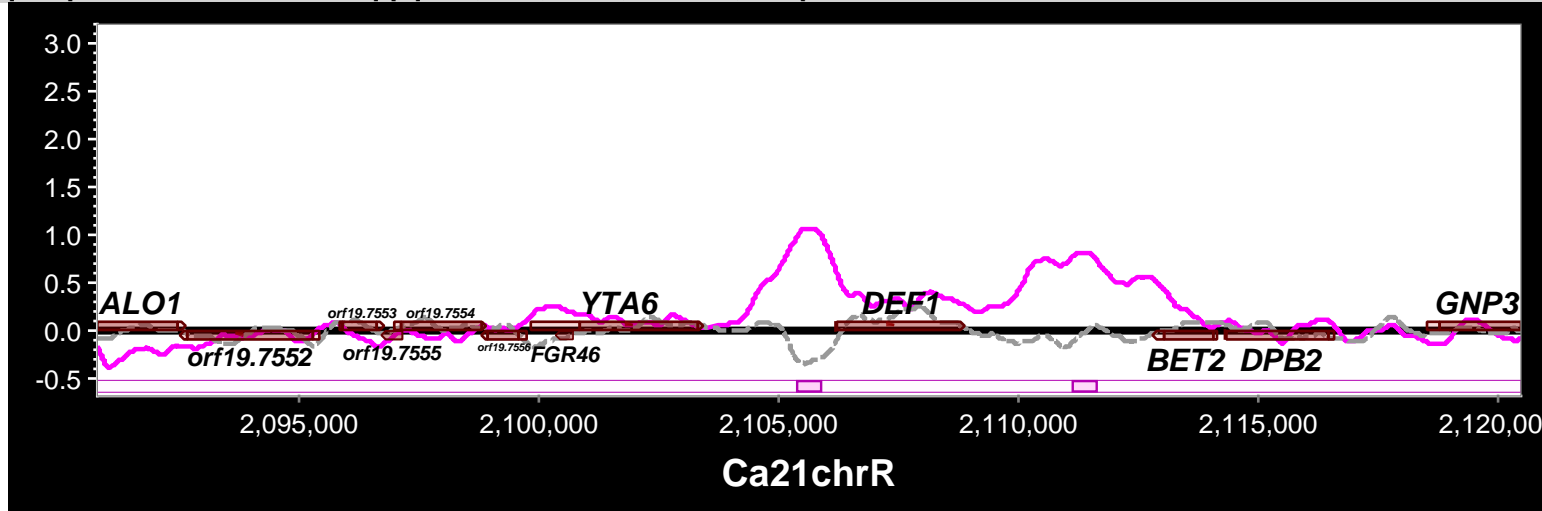

[1.061] Ca21chr1:423800-453483 [+] [HGT2, SHA3, orf19.3667, orf19.3666, orf19.3665]

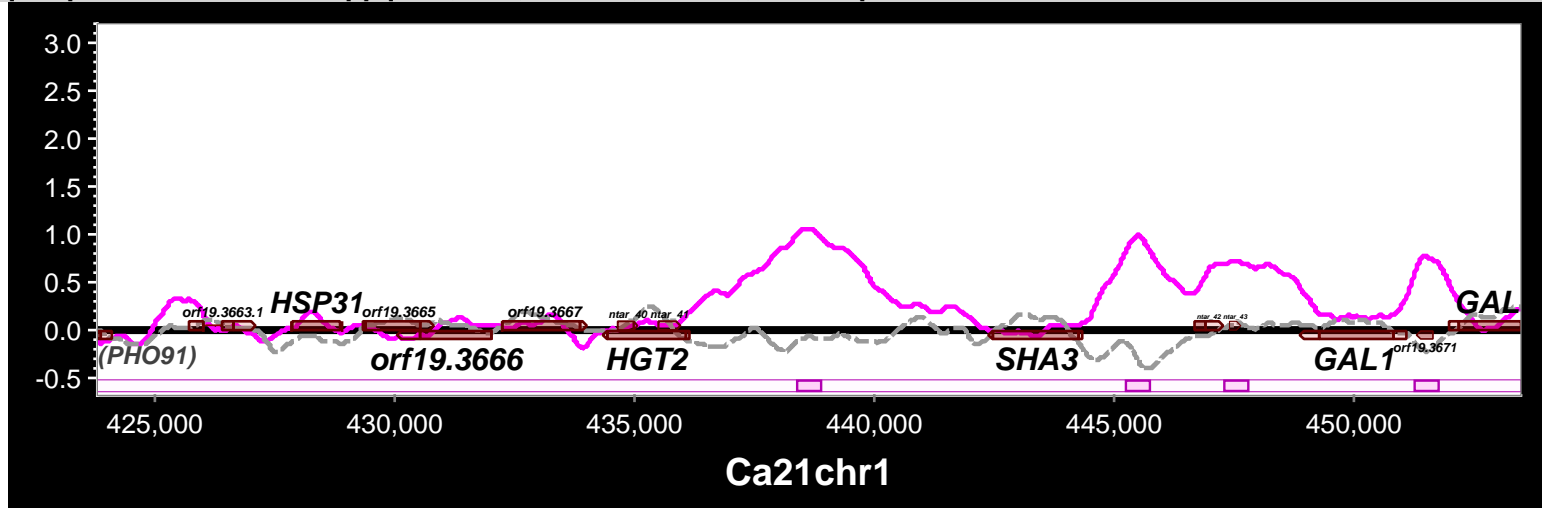

[1.058] Ca21chr3:655237-684920 [+] [orf19.314, DAL4, orf19.310, orf19.315, SEC13]

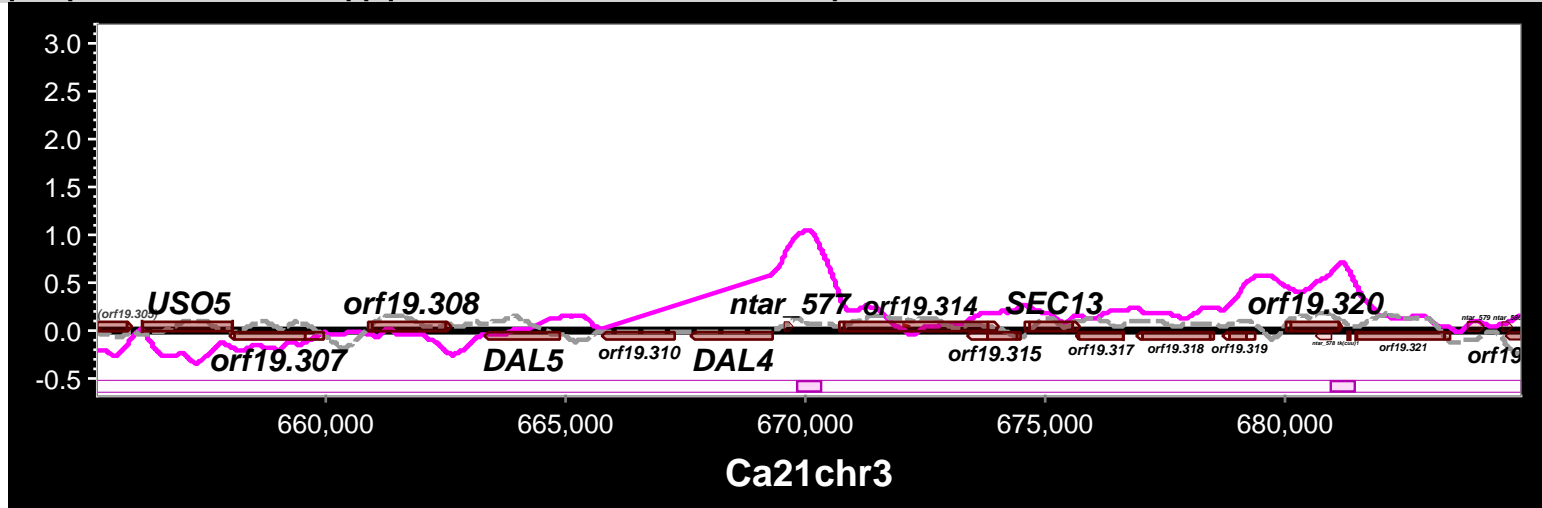

[1.051] Ca21chr5:639266-668949 [+] [MIG1, orf19.4321, DAP2, GRE3, orf19.4316]

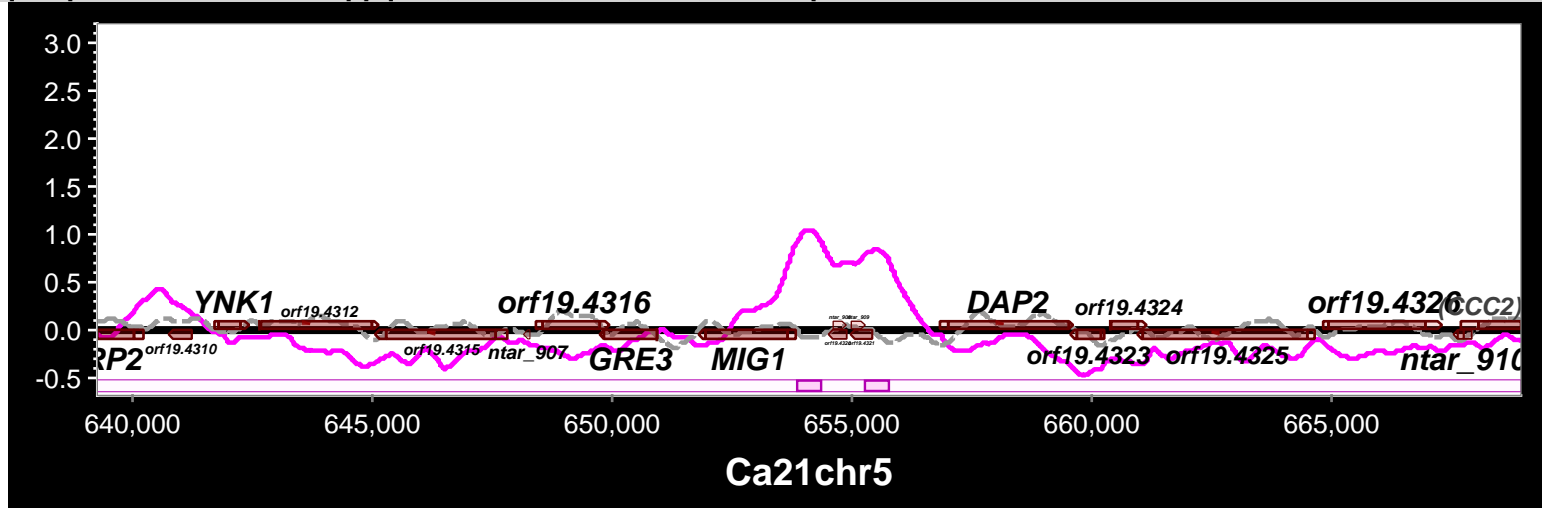

[1.049] Ca21chr1:1508236-1537919 [+] [GAP4, TAF145, orf19.6194, orf19.6195, orf19.4455]

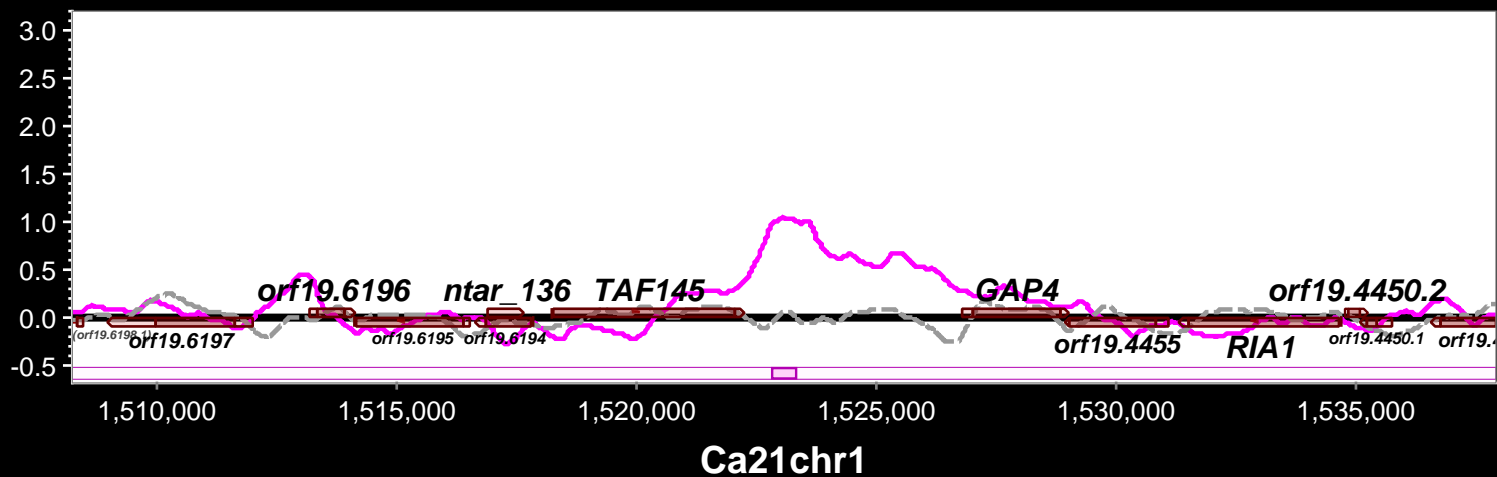

[1.041] Ca21chr1:2976192-3005875 [+] [KIS2, orf19.4998, orf19.4996, orf19.4995, CYB2]

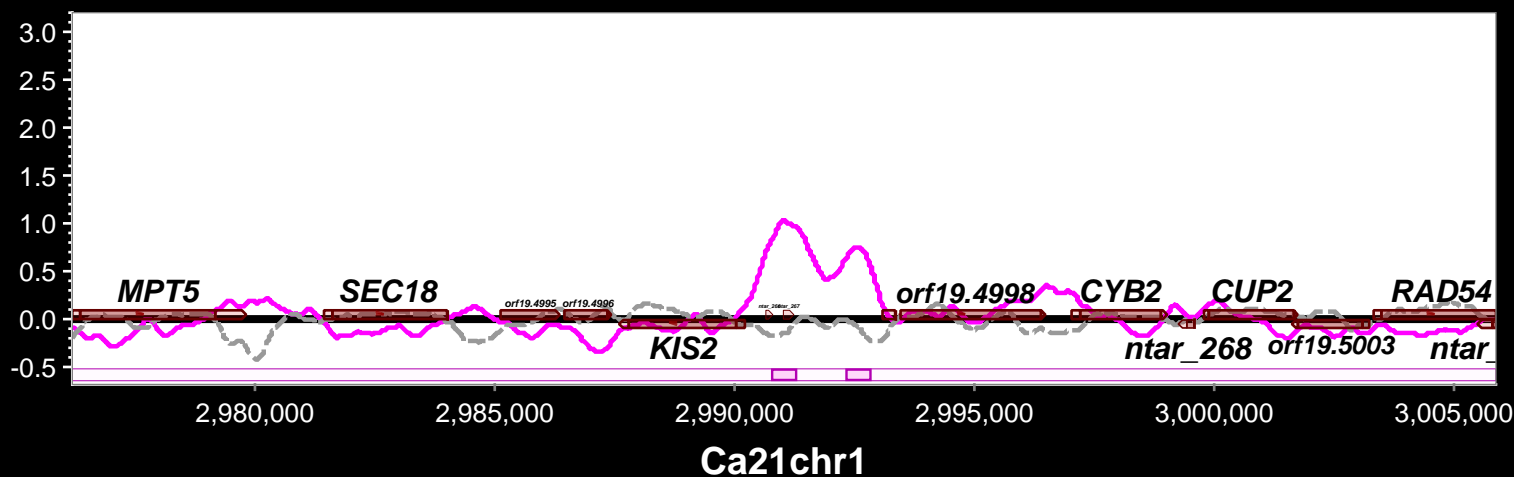

[1.037] Ca21chr4:1491613-1521296 [+] [GUT2, orf19.3134, orf19.3132, orf19.3135, orf19.3136]

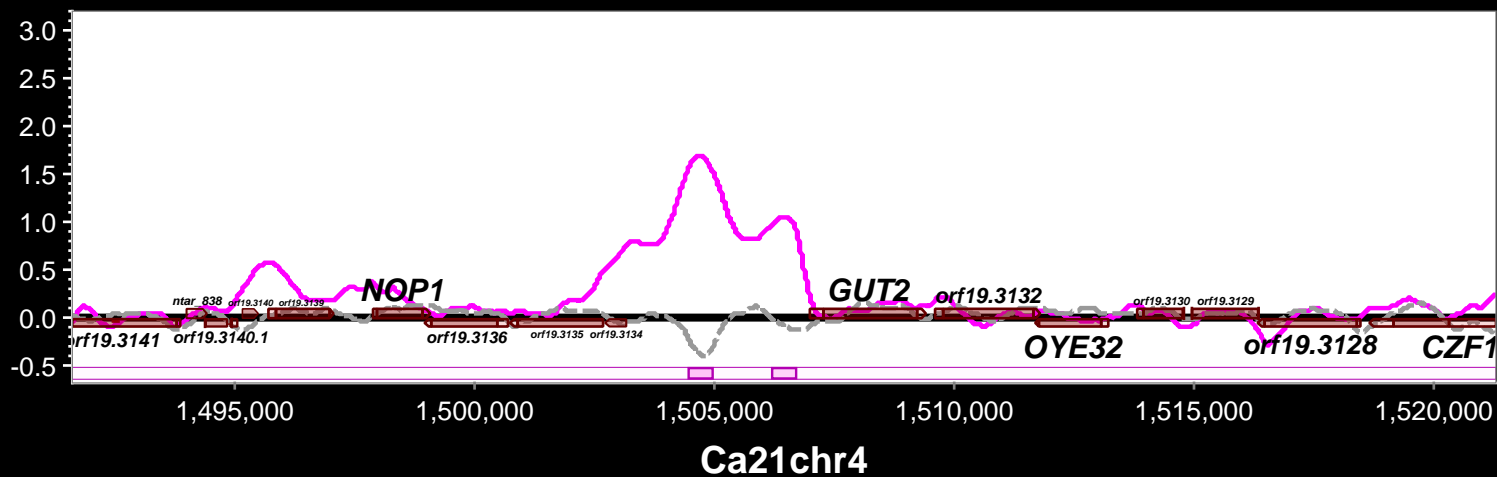

[1.033] Ca21chr5:1032679-1062362 [+] [orf19.3968, PFK1, CRH12, orf19.3965]

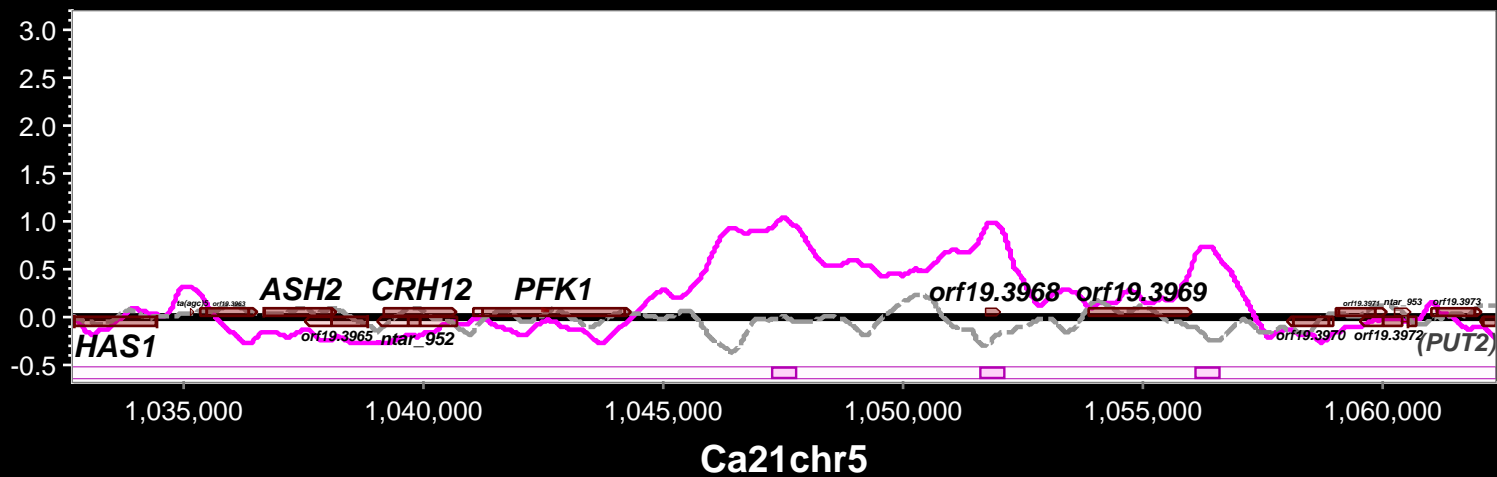



[1.024] Ca21chrR:2250519-2280202 [+] [POP3, RFC4, orf19.7660, HMI1, RPO21]

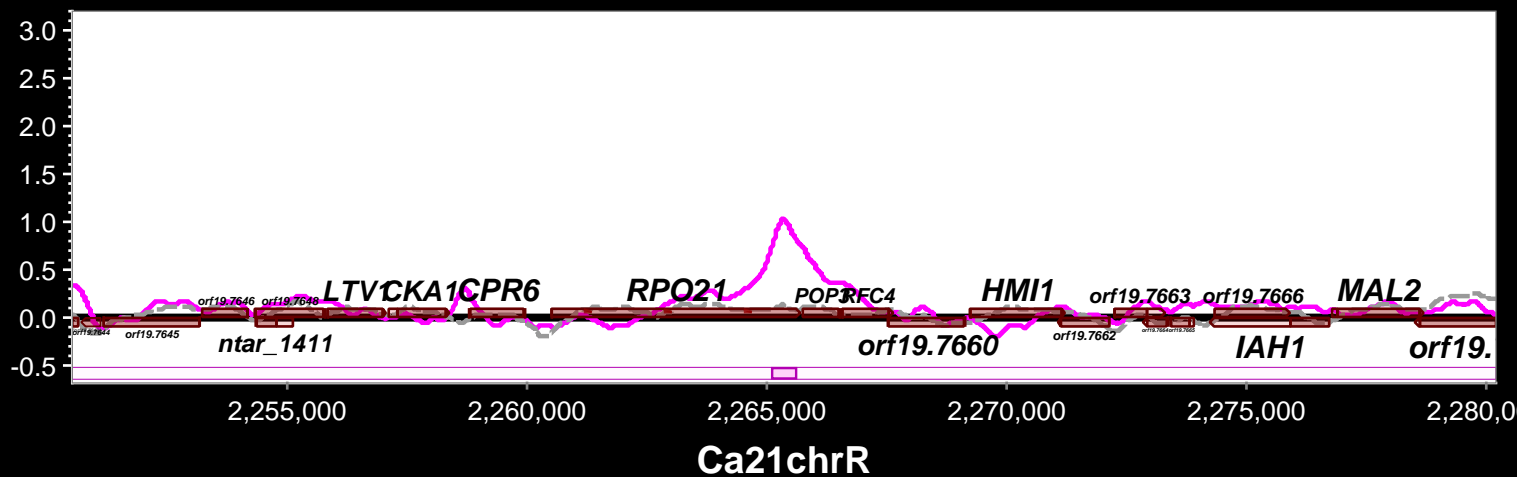

[1.023] Ca21chr7:432914-462597 [+] [CUP9, HSP90, EXO70, RAD14, orf19.6518]

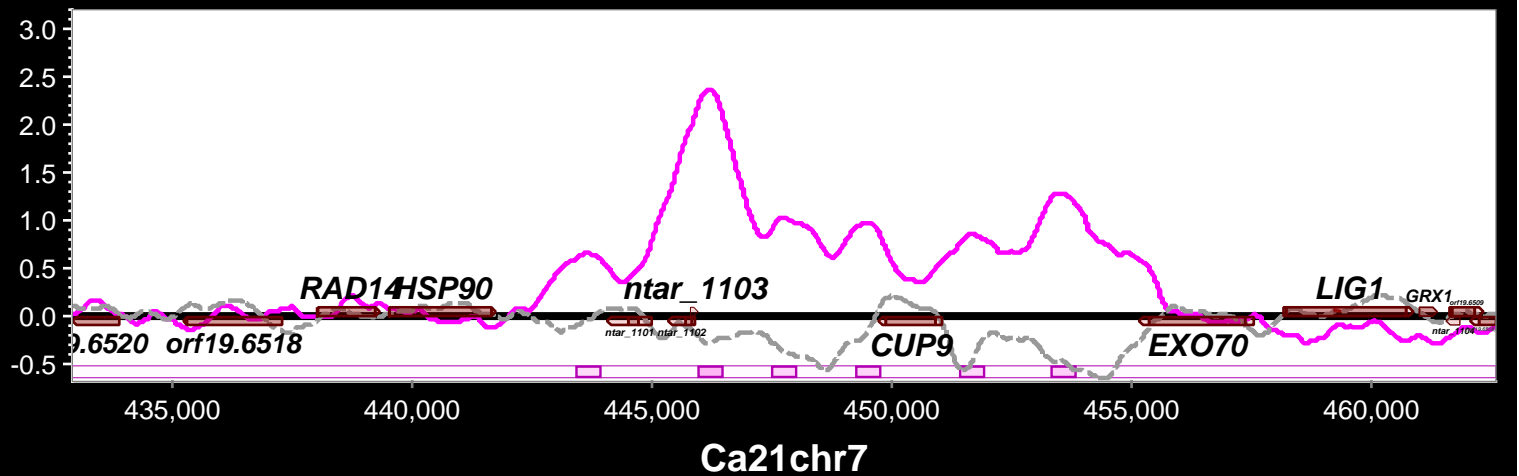

[1.021] Ca21chrR:1593115-1622798 [+] [tK(UUU)2, LPD1, KGD2, MRPL8, KSR1]

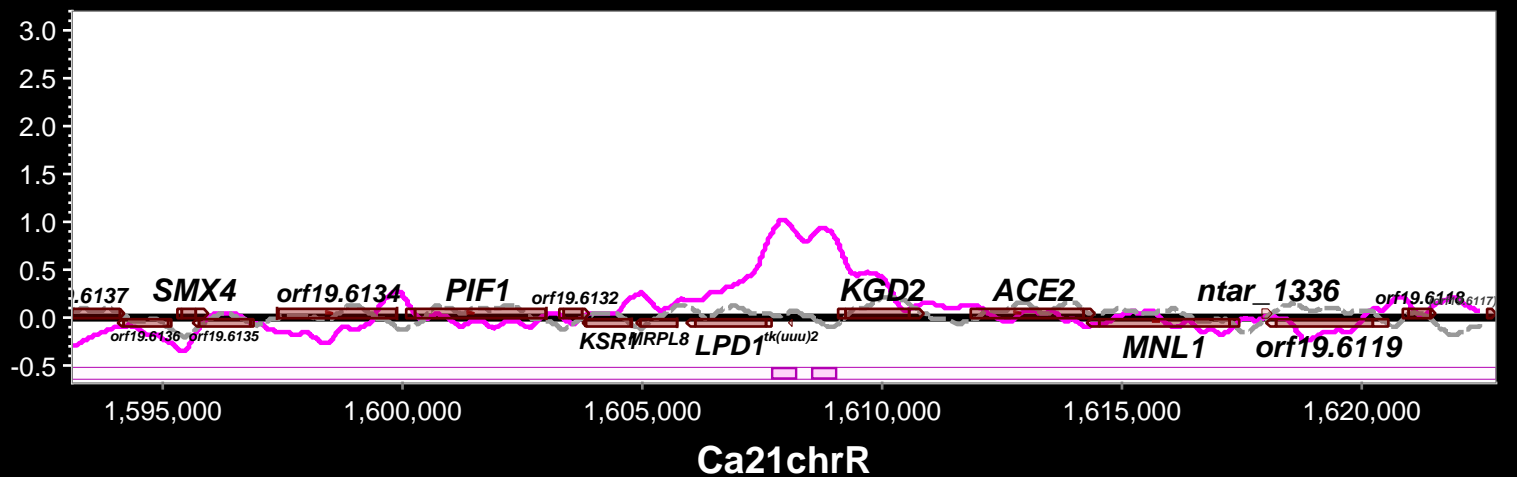

[1.016] Ca21chrR:1295821-1325504 [+] [RPL7, orf19.3868, RFX1, orf19.3869, orf19.3863]

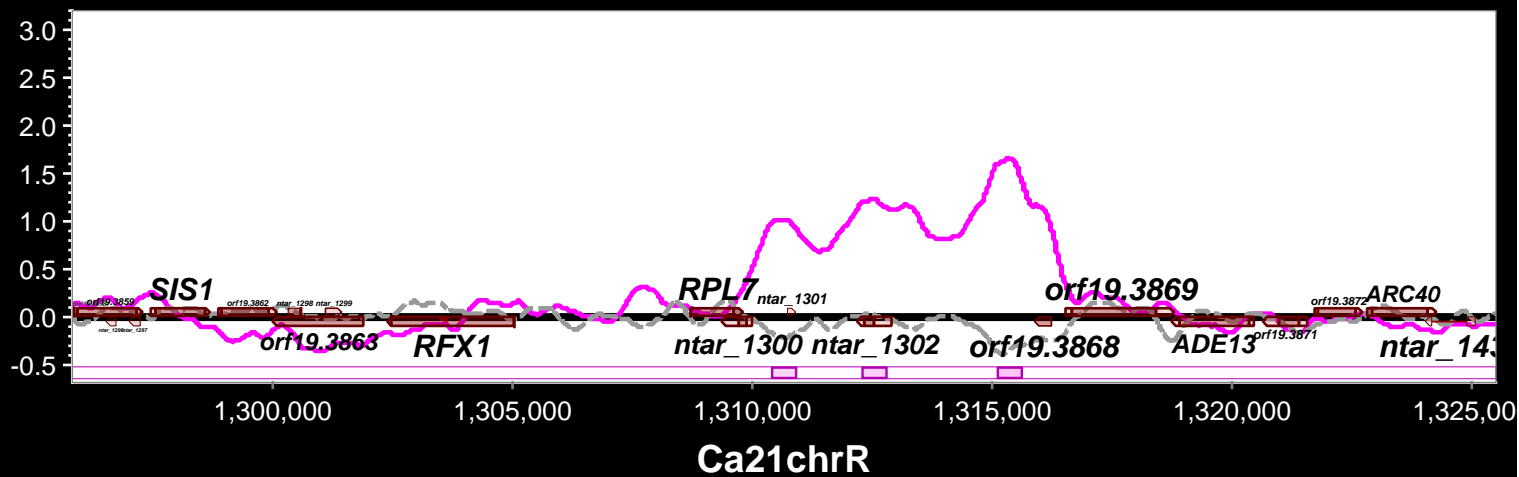

[1.014] Ca21chr3:36028-65711 [+] [orf19.5431, TPT1, orf19.5433, BUD21, orf19.5429]

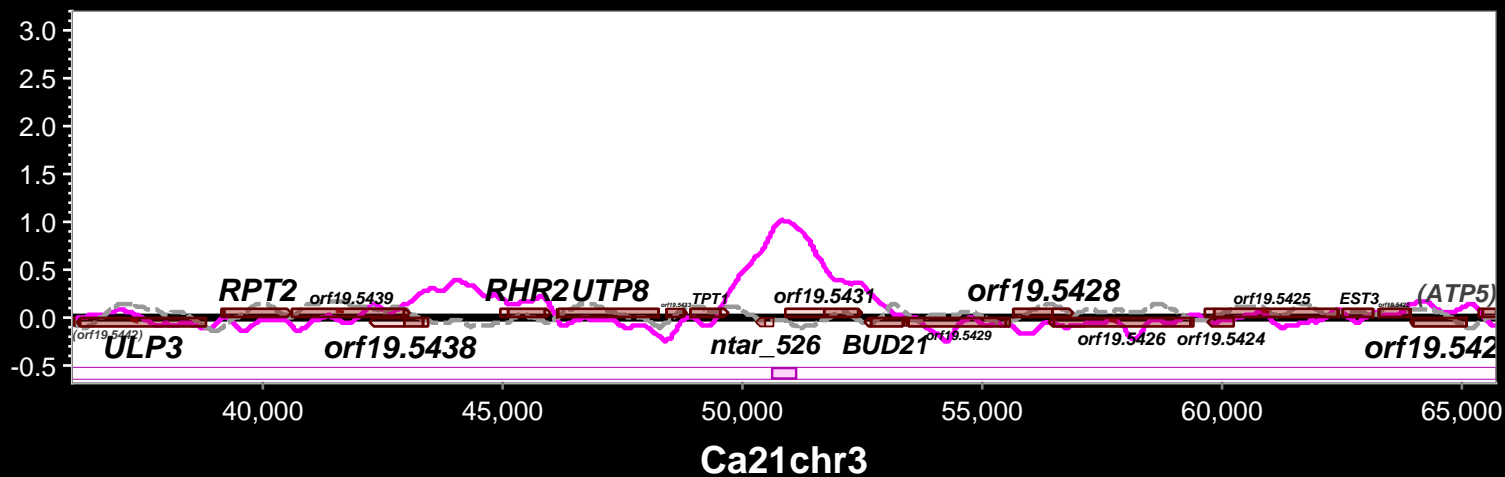

[1.013] Ca21chr1:2172823-2202506 [+] [CPP1, SWE1, orf19.4865, SFU1, orf19.4864]

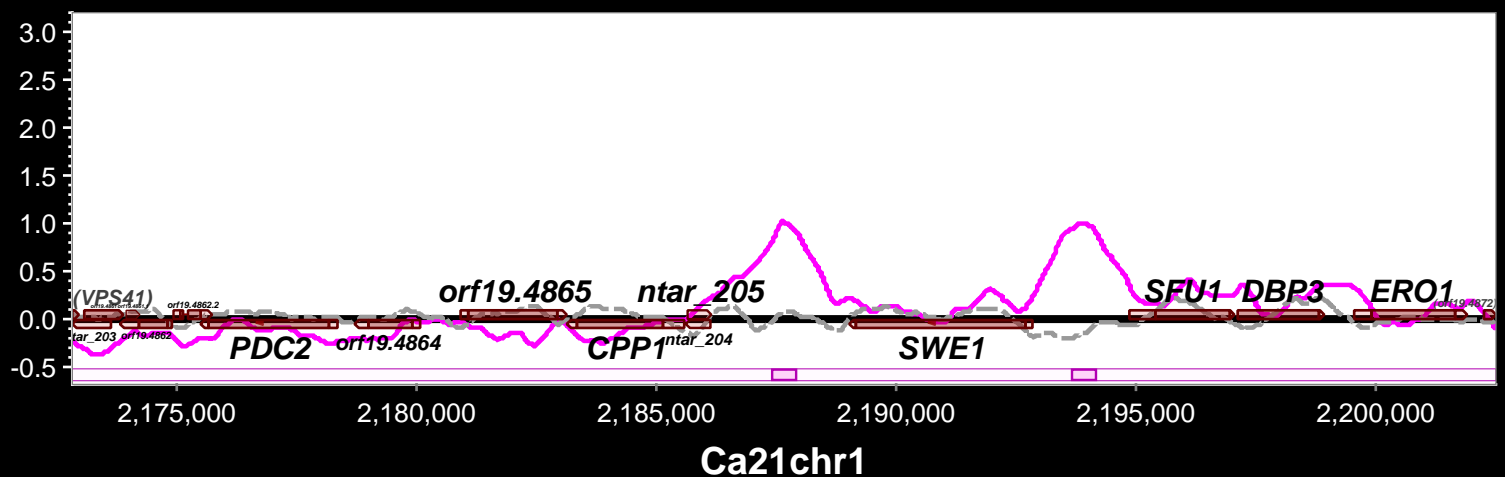

[1.012] Ca21chr5:837920-867603 [+] [orf19.1106, orf19.1105.3, PGA56, orf19.1107, orf19.1105]

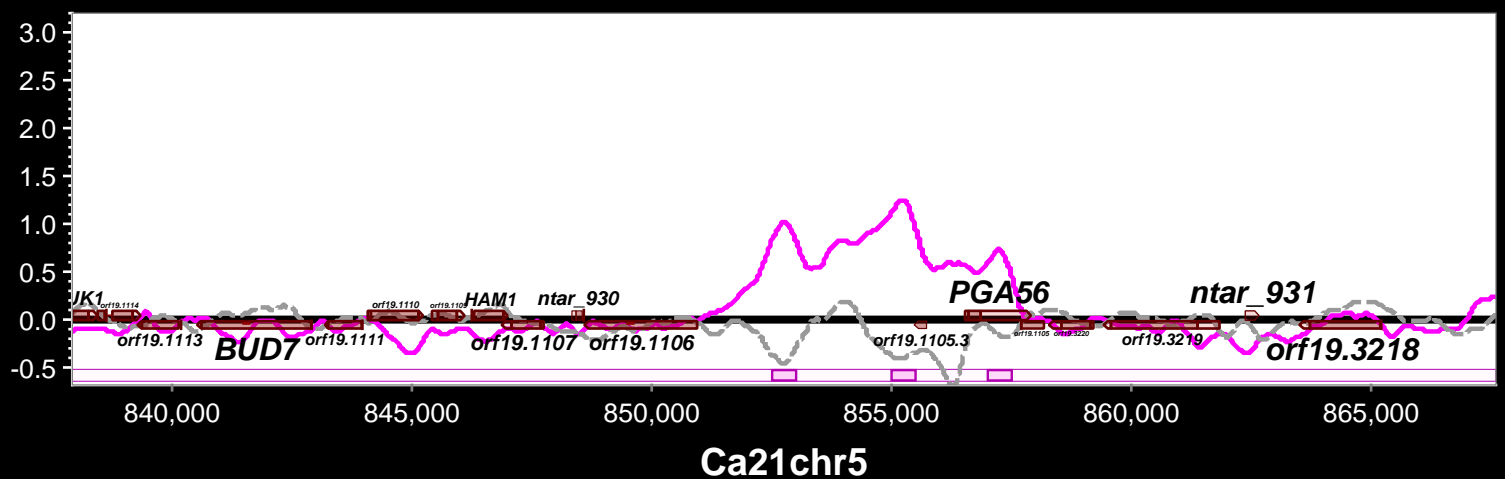

[1.01] Ca21chr1:3146725-3176408 [+] [orf19.7250, RIM101, WSC4, orf19.7252, orf19.7245]

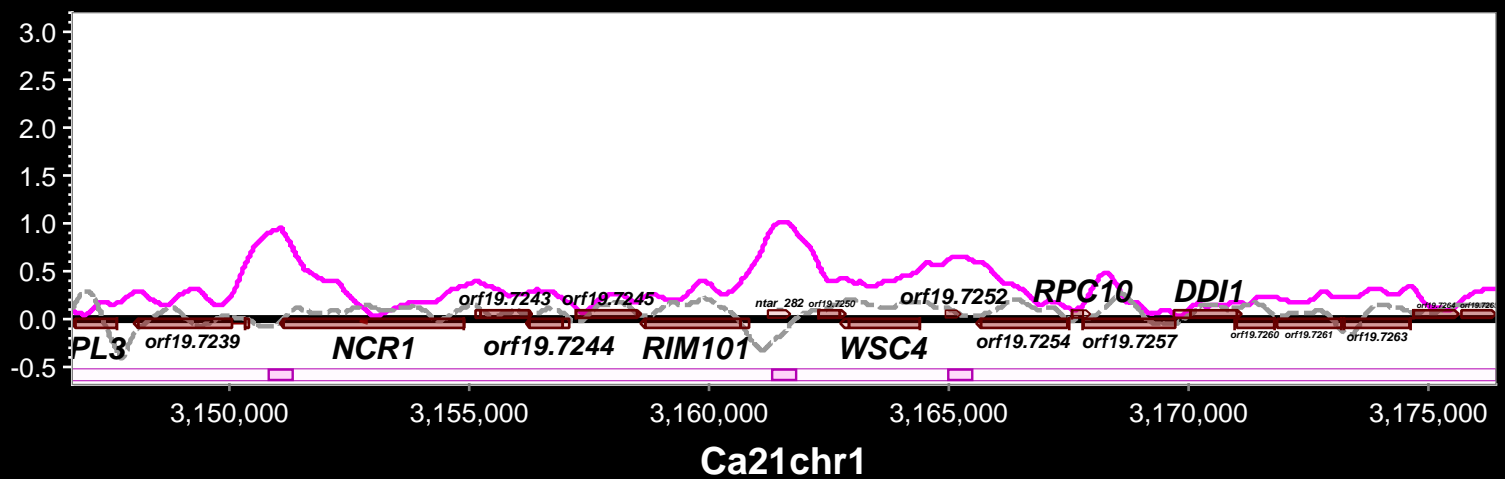

[1.009] Ca21chr1:2875981-2905664 [+] [orf19.4952, orf19.4952.1, orf19.4951, orf19.4953, AKR1]

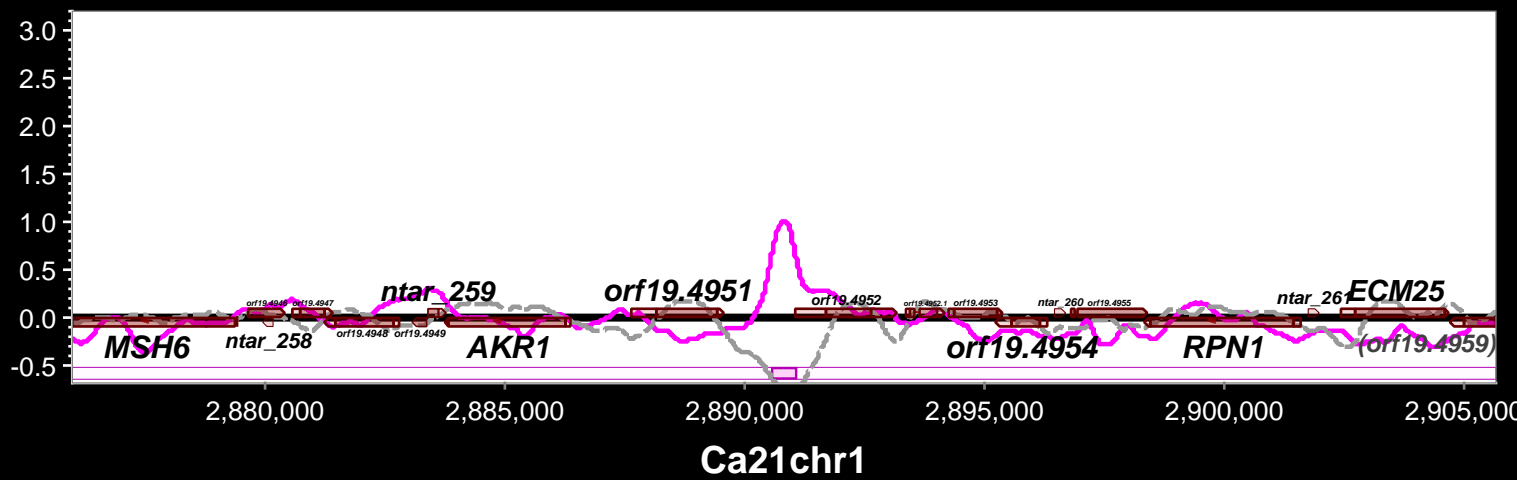

[1.008] Ca21chr6:21656-51339 [+] [orf19.1189, CPH2, orf19.1186, orf19.1185, orf19.1183]

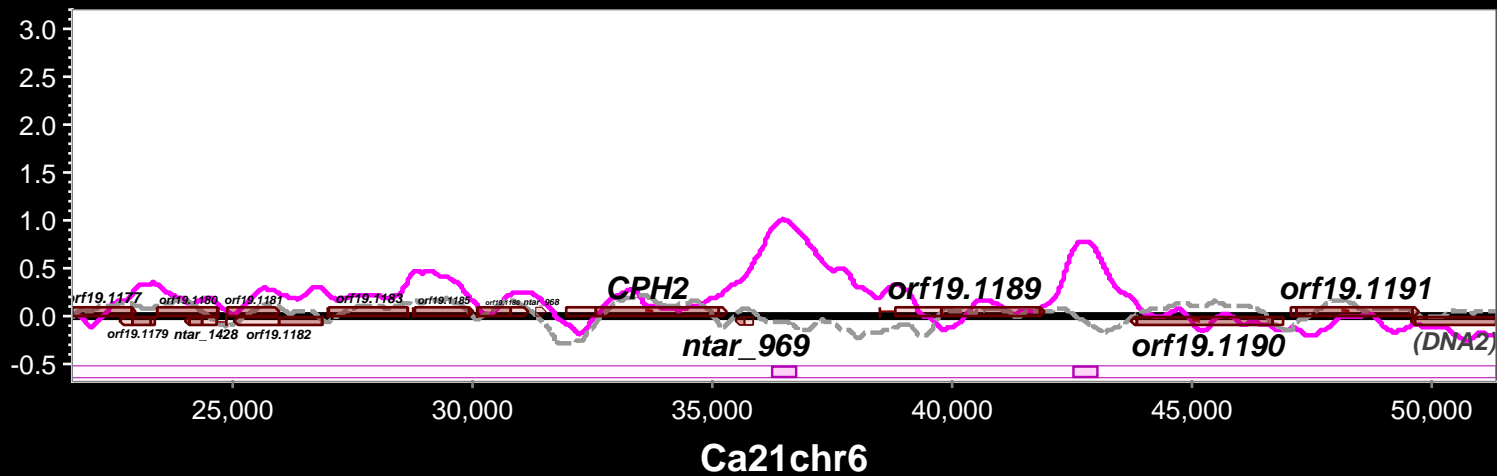

[0.998] Ca21chr1:1067445-1097128 [+] [GAT2, orf19.450, orf19.4057, orf19.449, orf19.4059]

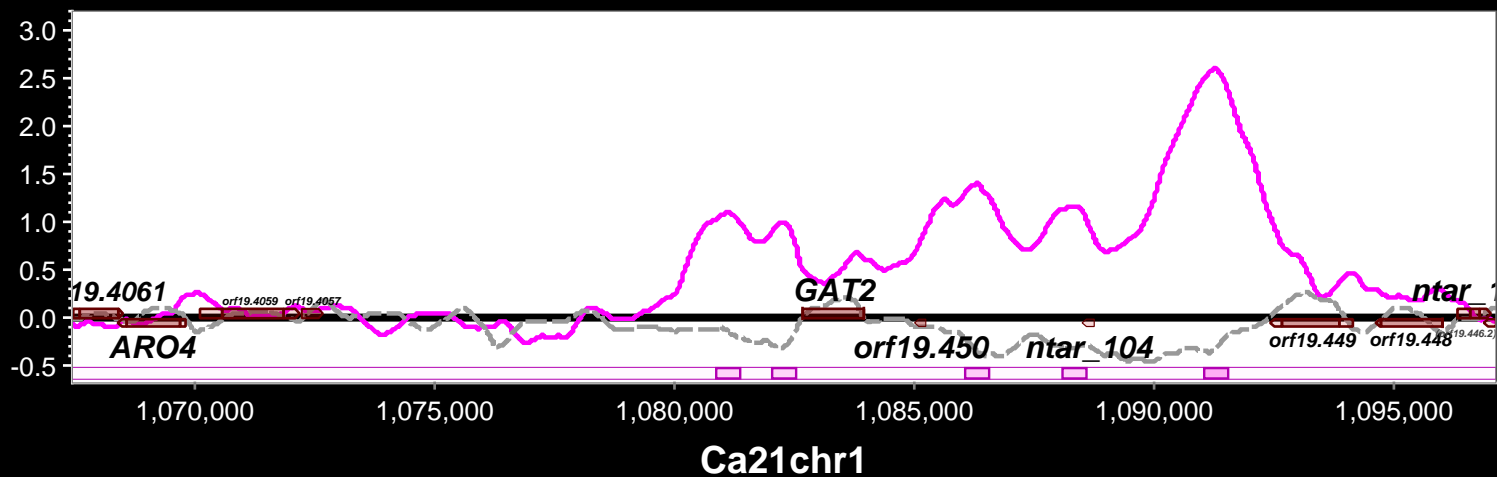

[0.998] Ca21chr5:1037020-1066703 [+] [orf19.3968, orf19.3969, orf19.3970, orf19.3971, orf19.3972]

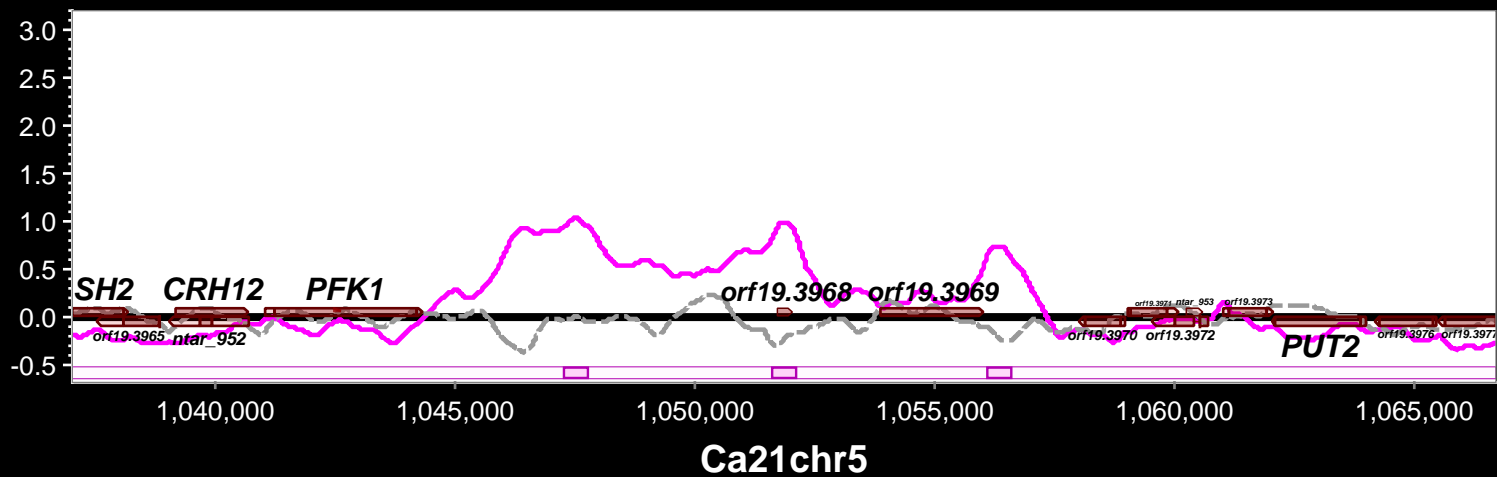

[0.997] Ca21chr1:2179075-2208758 [+] [SWE1, SFU1, DBP3, ERO1, orf19.4872]

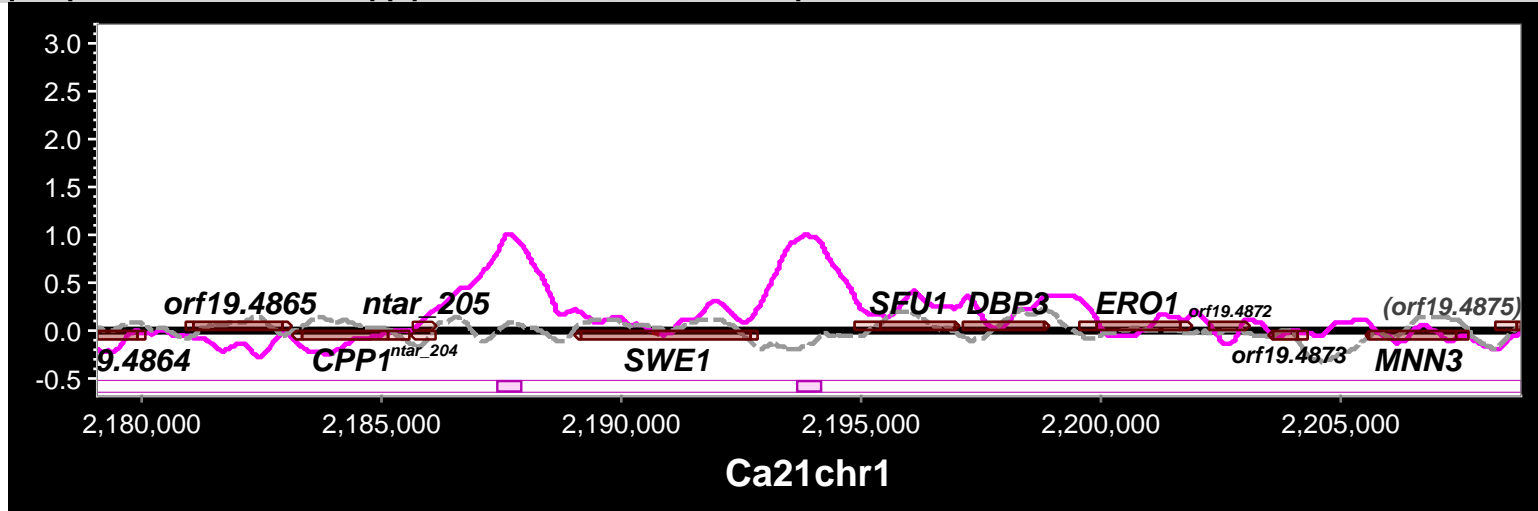

[0.987] Ca21chr1:430655-460338 [+] [SHA3, GAL1, orf19.3671, GAL10, orf19.3673]

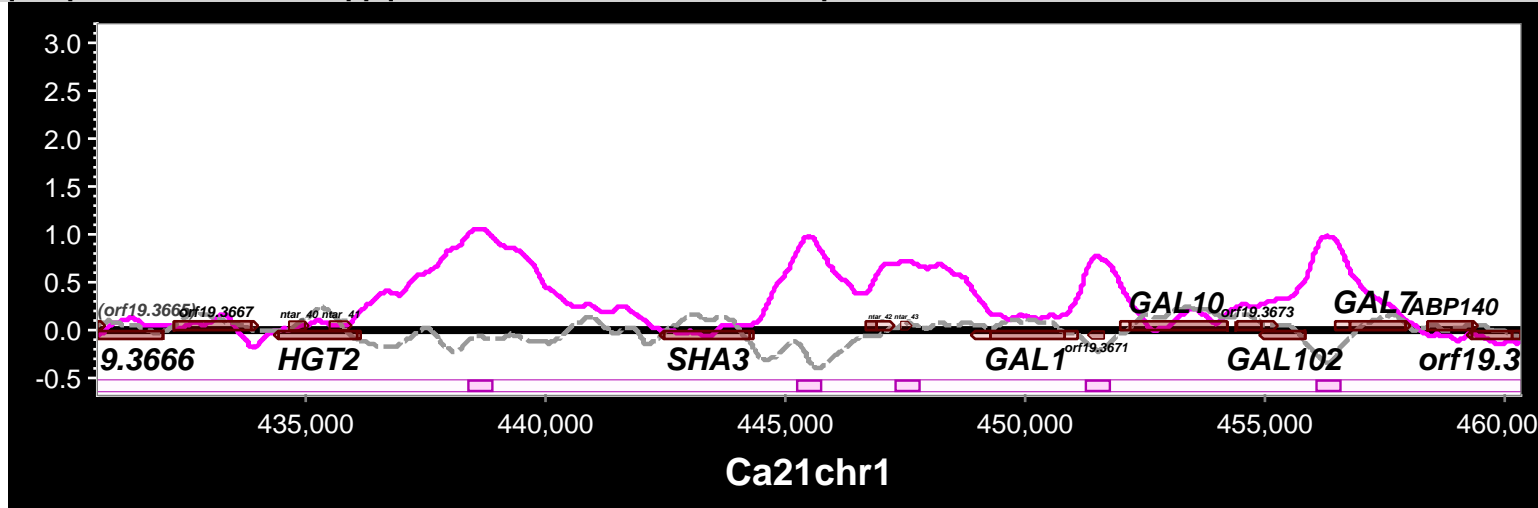

[0.985] Ca21chr5:585504-615187 [+] [orf19.4283, orf19.4282, BUR2, orf19.4281, orf19.4286]

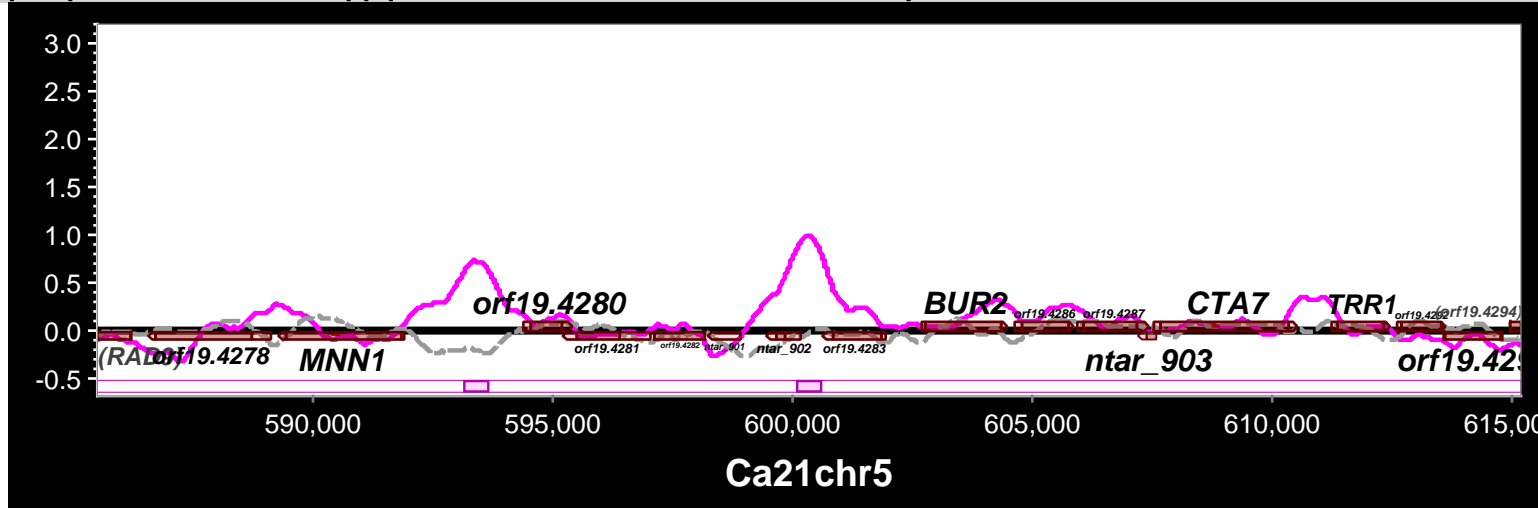

[0.982] Ca21chrR:1177644-1207327 [+] [tC(GCA)1, tC(GCA)2, orf19.5844, orf19.5843, RNR3]

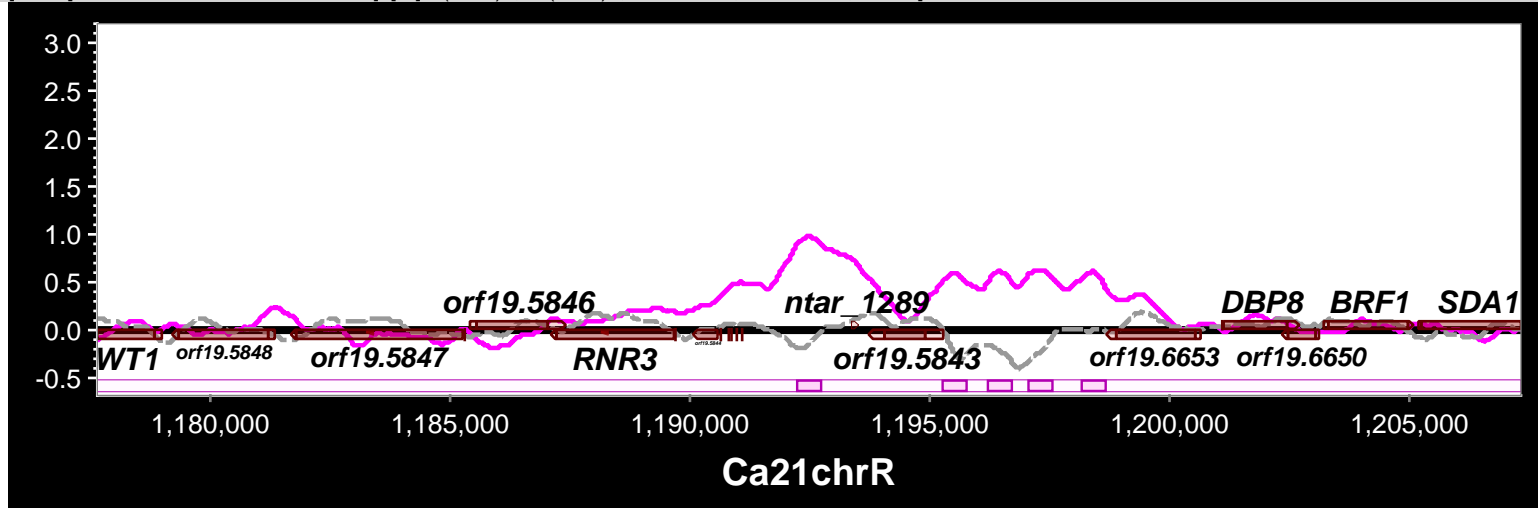

[0.981] Ca21chr1:3058085-3087768 [+] [SIM1, orf19.5033, orf19.5034, SSK1, orf19.5030]

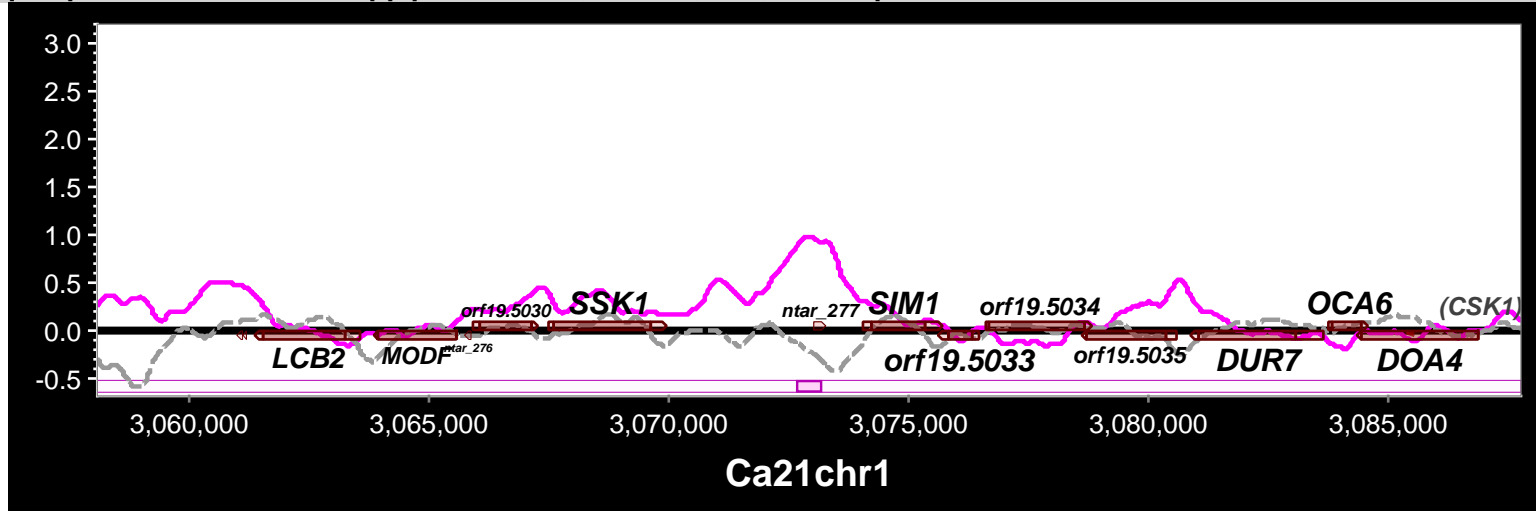

[0.981] Ca21chr7:896849-926532 [+] [orf19.7152, orf19.7151, orf19.7153, NRG1, UTP18]

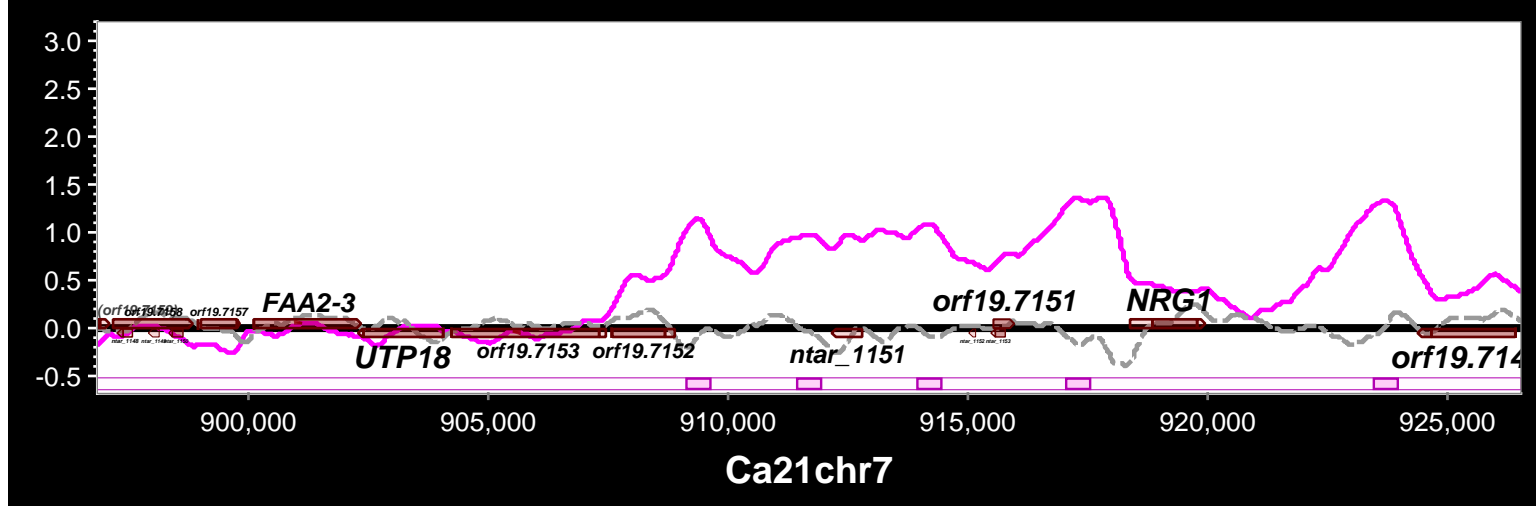

[0.98] Ca21chr1:441484-471167 [+] [GAL7, GAL102, orf19.3673, ABP140, orf19.3677]

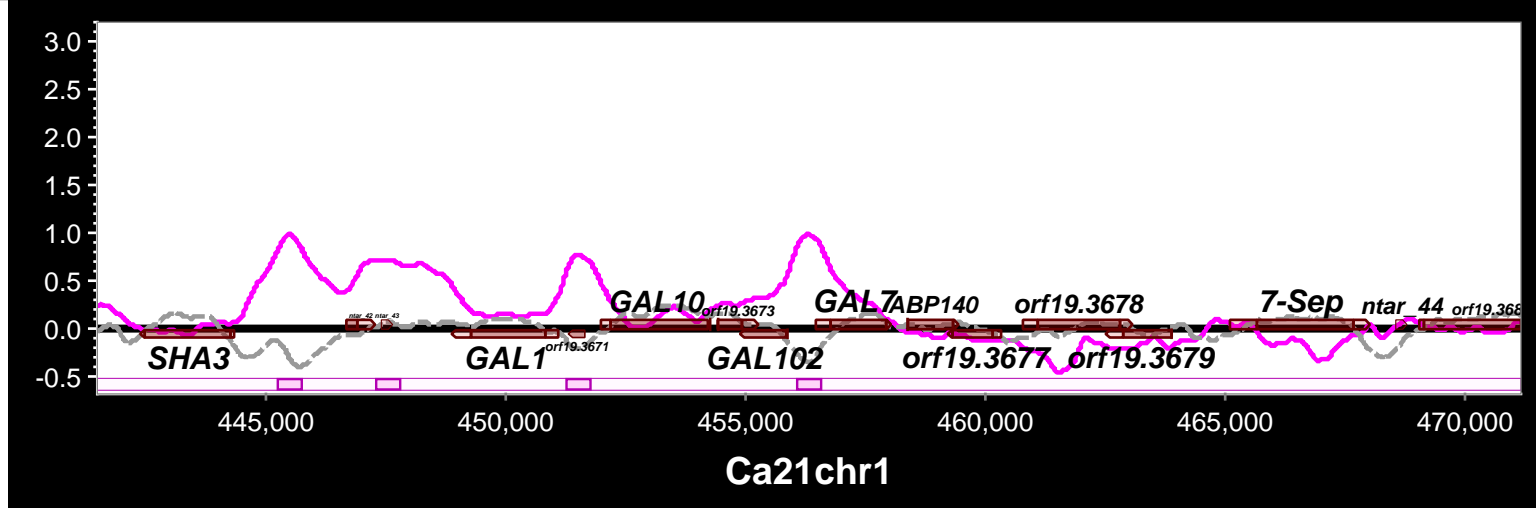

[0.976] Ca21chr6:890675-920358 [+] [ALS4, orf19.4553, orf19.77.1, orf19.4557, SPB1]

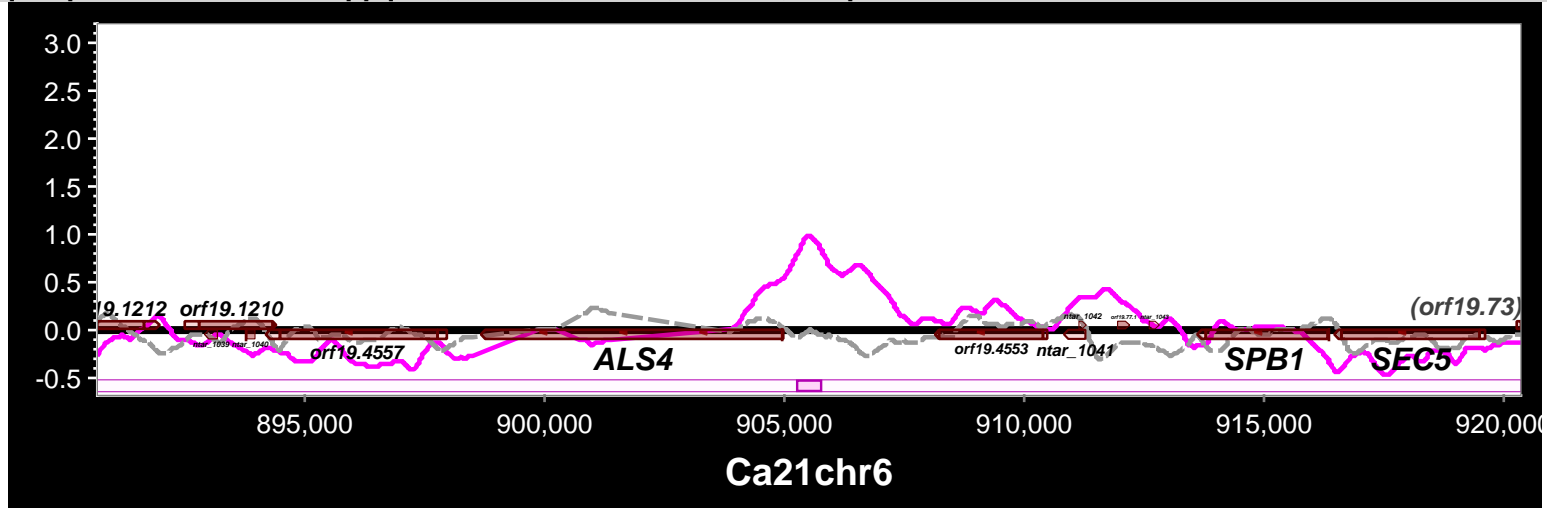

[0.973] Ca21chr1:1484861-1514544 [+] [RBT4, orf19.6203, orf19.6200, orf19.6205, orf19.6199]

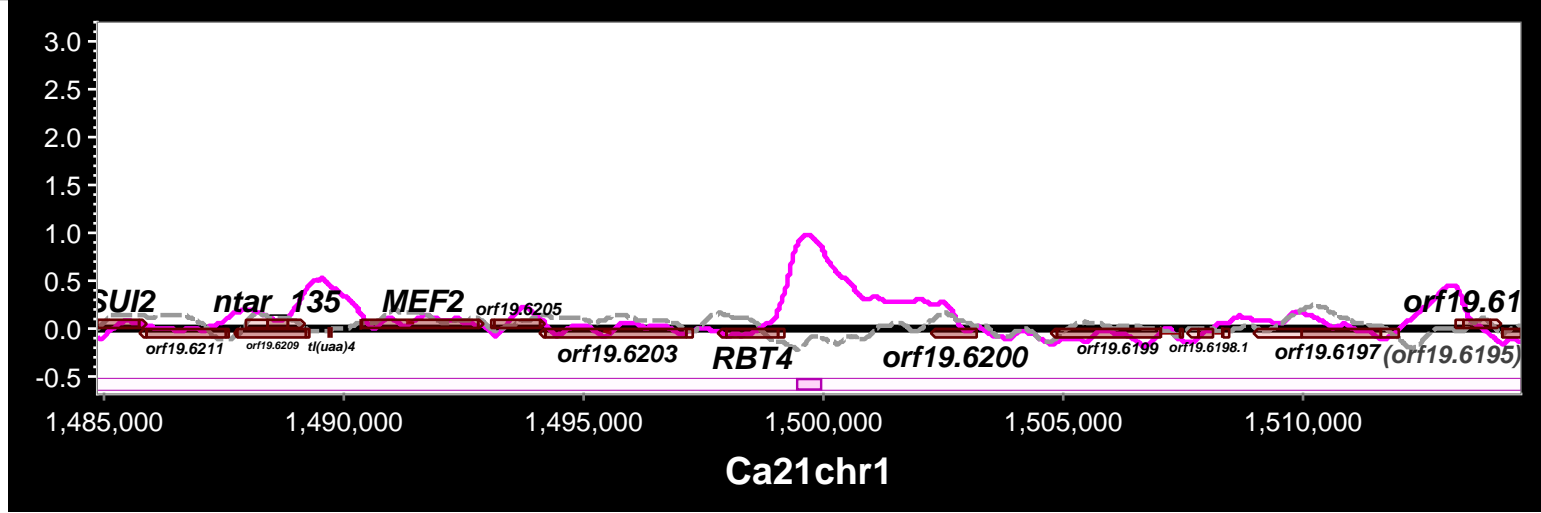

[0.97] Ca21chr7:434668-464351 [+] [CUP9, EXO70, LIG1, HSP90, RAD14]

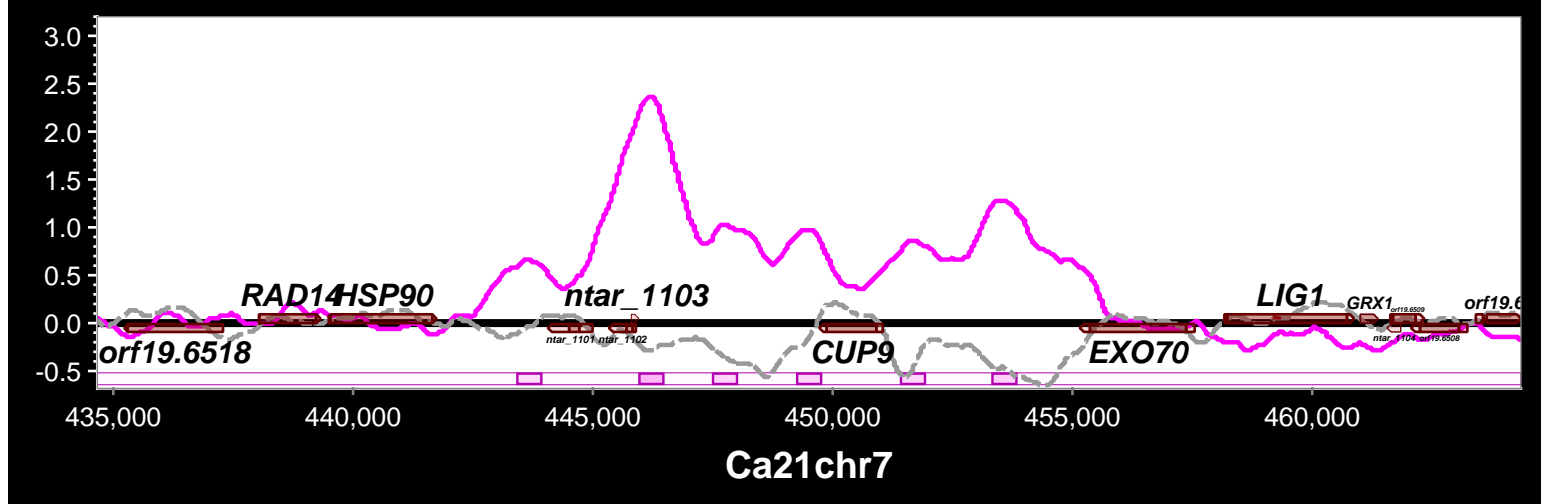

[0.97] Ca21chrR:1251149-1280832 [+] [SFL1, SOK1, orf19.3848, orf19.457, orf19.458]

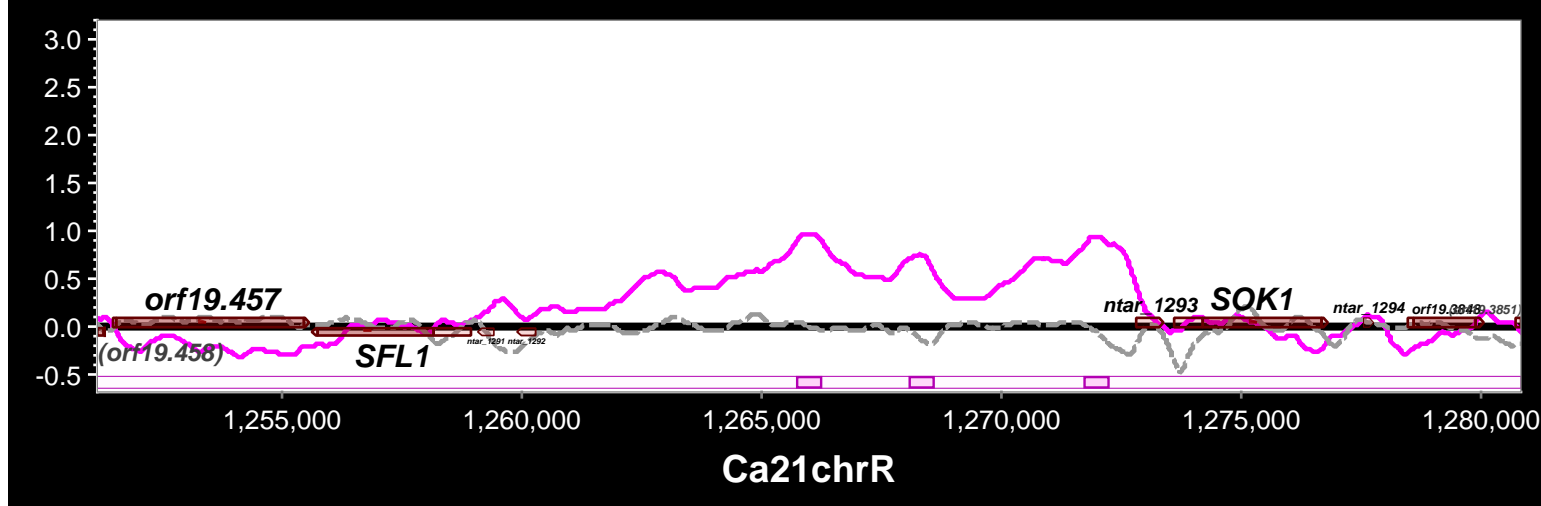

[0.965] Ca21chr2:1638389-1668072 [+] [PHM7, orf19.2169, orf19.2168.3, orf19.2168, ARA1]

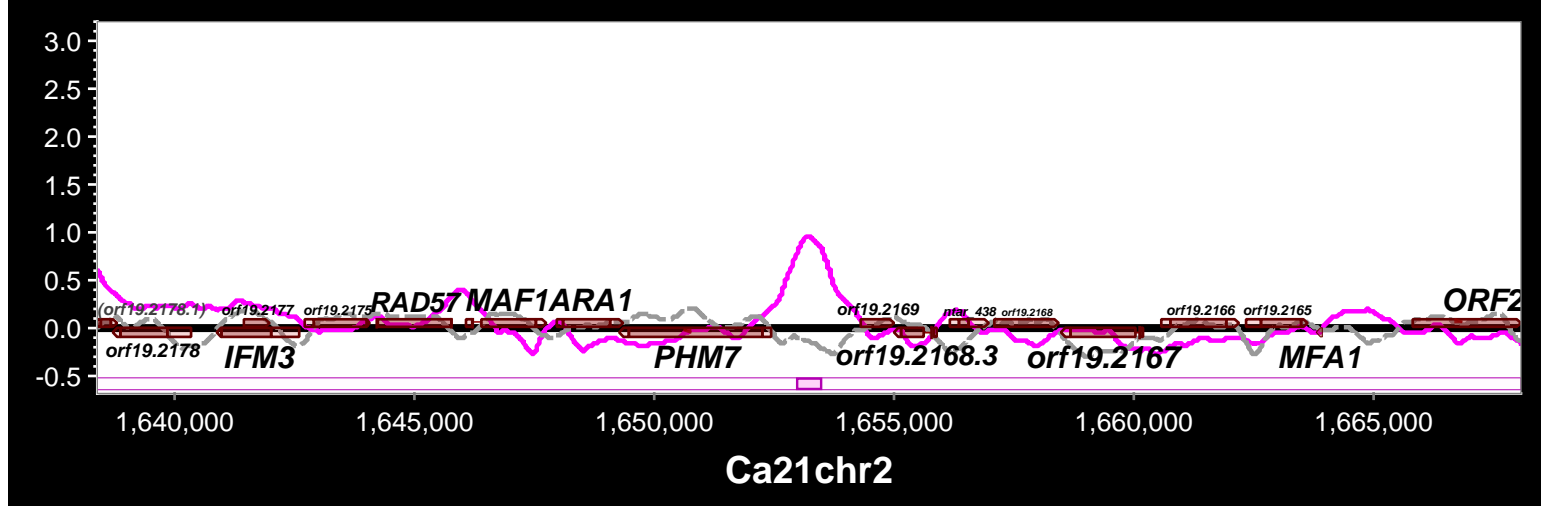

[0.965] Ca21chr3:1345086-1374769 [+] [orf19.7381, CAM1, orf19.7380, MNN9, NOG1]

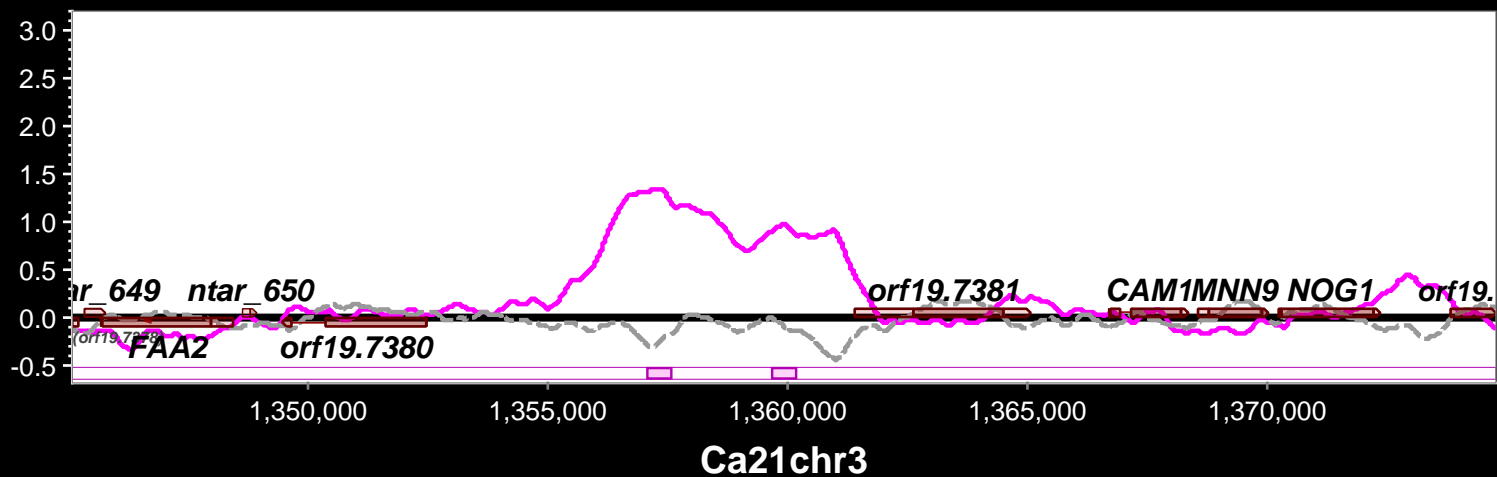

[0.964] Ca21chrR:573848-603531 [+] [orf19.2822, orf19.2821, orf19.2820, orf19.2819, orf19.2818]

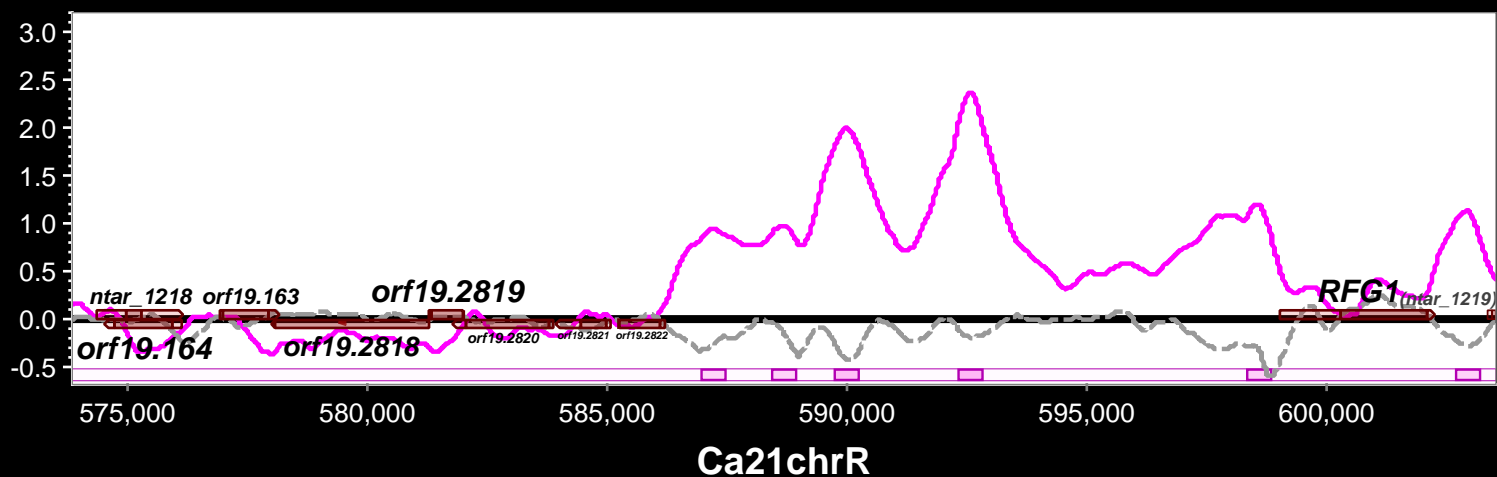

[0.963] Ca21chr3:1204516-1234199 [+] [orf19.6983, orf19.6984, orf19.6982, TEA1, orf19.6981]

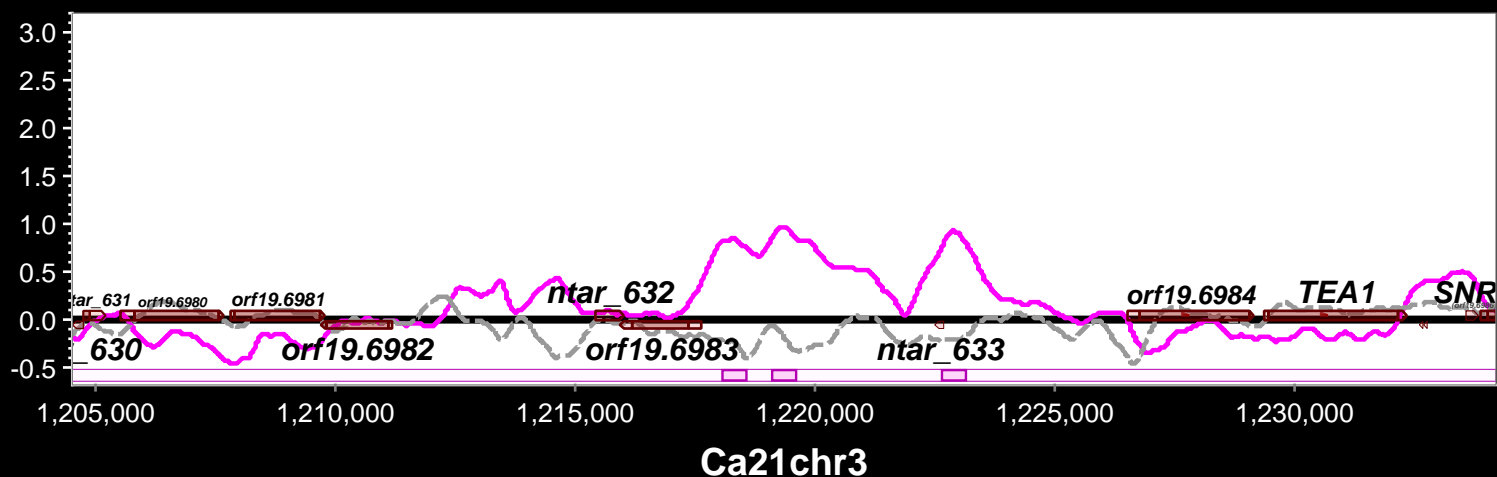

[0.96] Ca21chrR:1874854-1904537 [+] [RDN5, RDN18, RDN58, RDN25, TAR1]

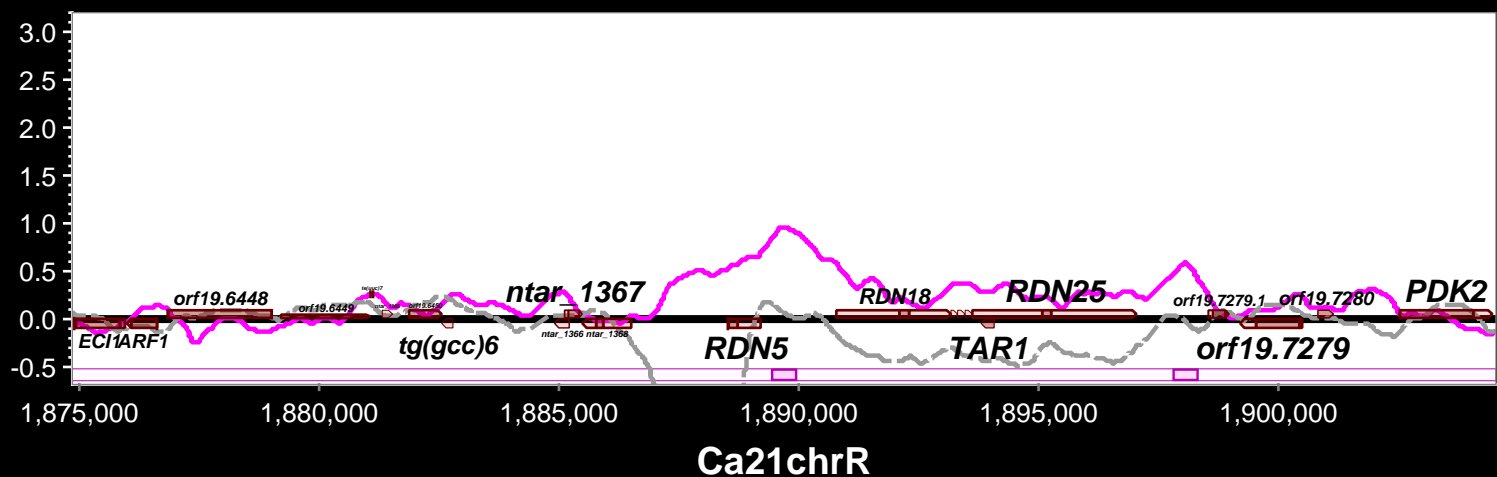

[0.956] Ca21chr1:2037611-2067294 [+] [orf19.4792, orf19.4793, orf19.4791, orf19.4789, orf19.4795]

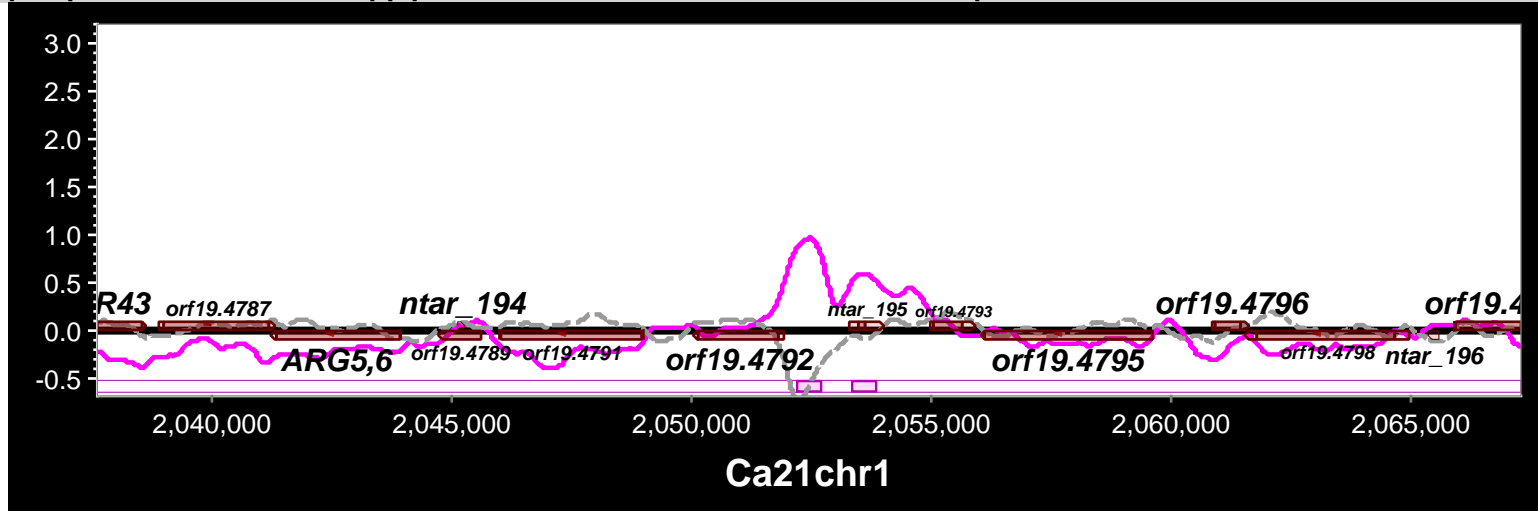

[0.955] Ca21chrR:1396061-1425744 [+] [RGS2, orf19.693, orf19.915, STE2, orf19.697]

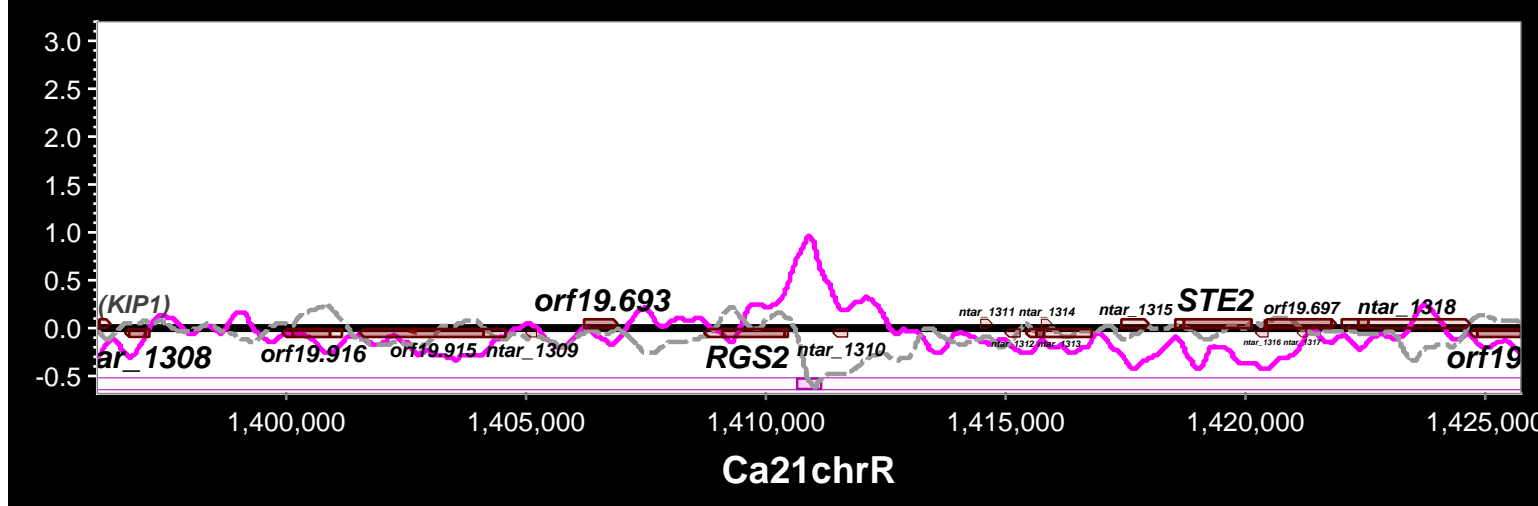

[0.955] Ca21chrR:1521274-1550957 [+] [ALS3, orf19.1815, orf19.1814, CRZ2, FLC2]

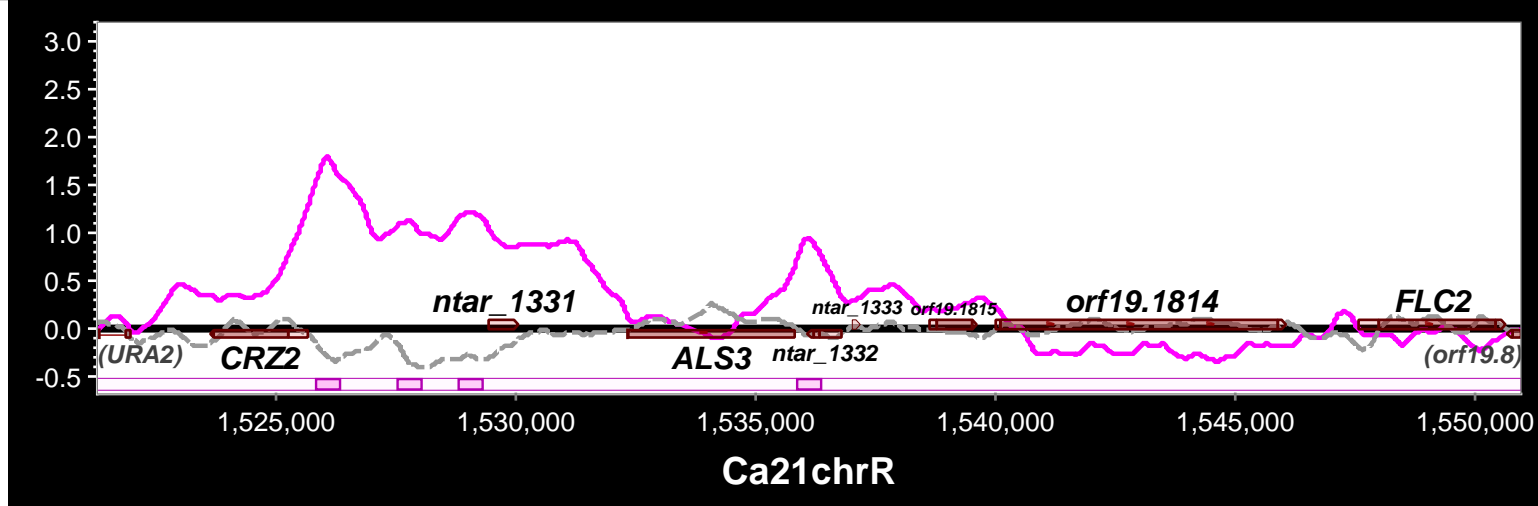

[0.95] Ca21chrR:1679622-1709305 [+] [SAP2, YHB5, orf19.3711, YHB1, orf19.3712]

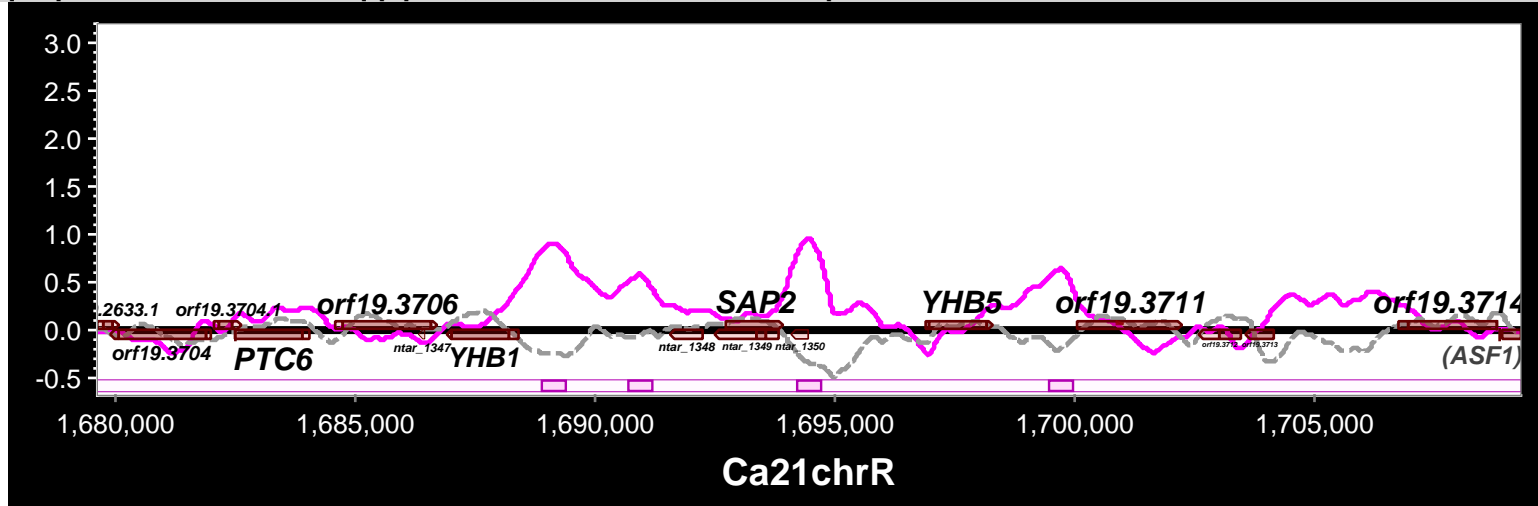



[0.949] Ca21chr1:3136228-3165911 [+] [orf19.7239, NPL3, NCR1, orf19.7243, orf19.7237]

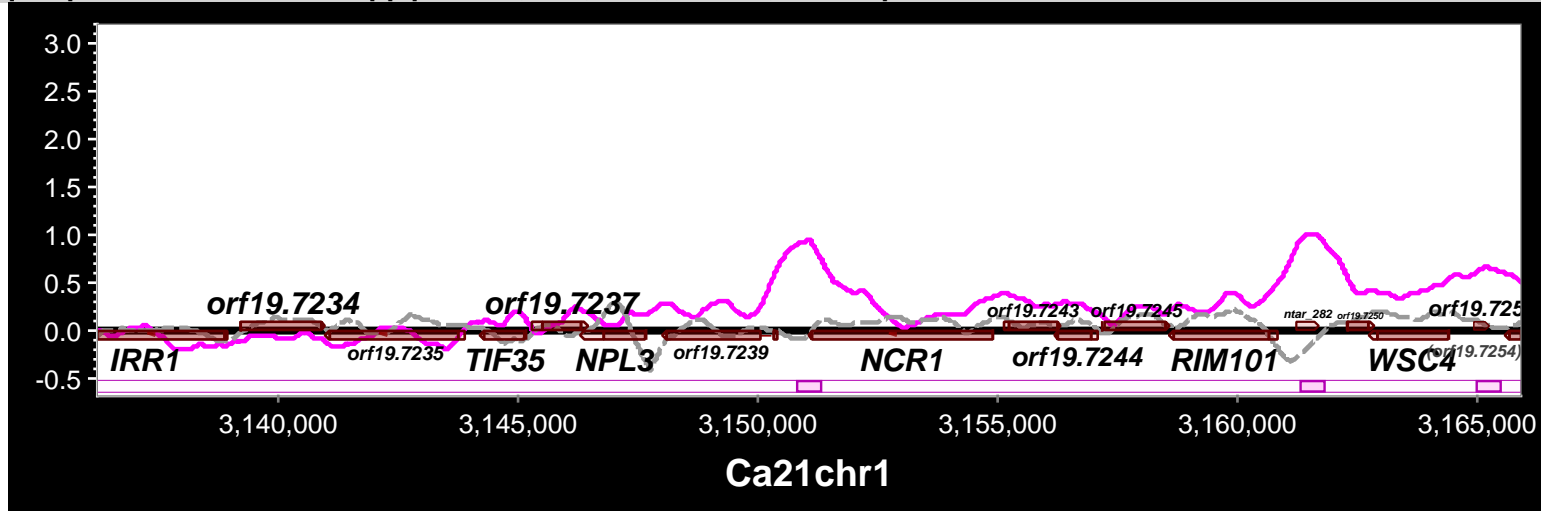

[0.949] Ca21chr3:1552278-1581961 [+] [FCR1, tw(CCA)2, orf19.6816, orf19.6818, TDH3]

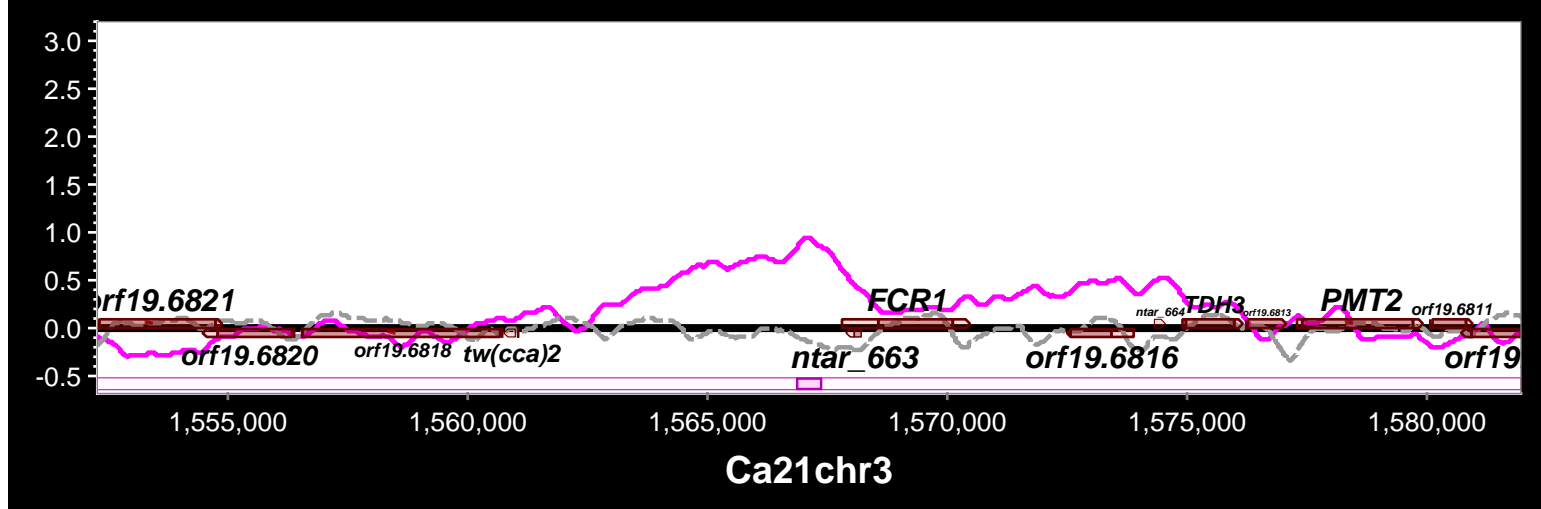

[0.947] Ca21chr5:233255-262938 [+] [CLN3, orf19.1959, orf19.1961, CYC3, orf19.1956]

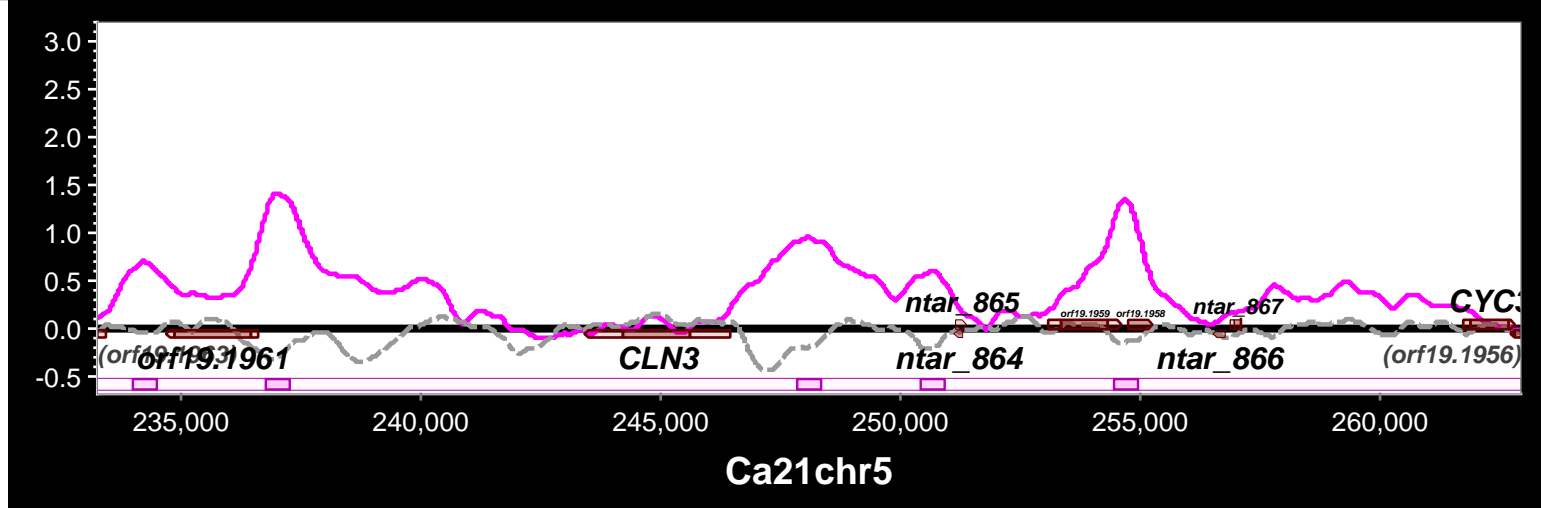

[0.944] Ca21chrR:1257141-1286824 [+] [SOK1, orf19.3848, orf19.3851, orf19.3852, SFL1]

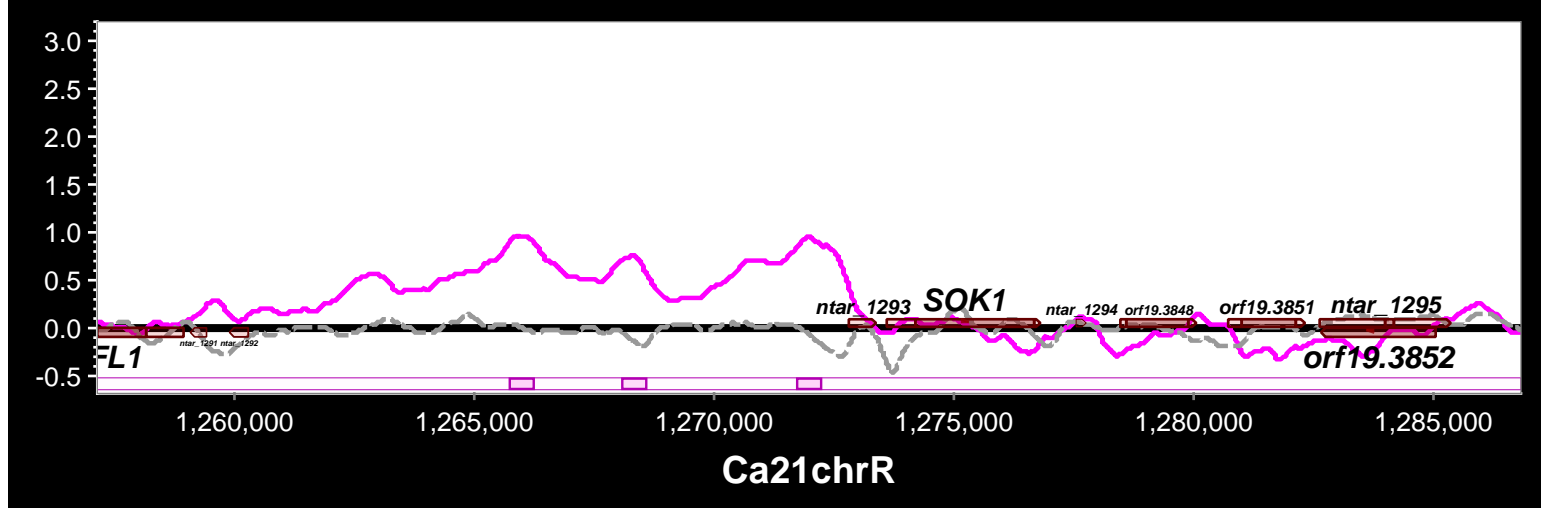

[0.941] Ca21chr1:216806-246489 [+] [orf19.3302, orf19.3303, orf19.3304, orf19.3305, orf19.3301]

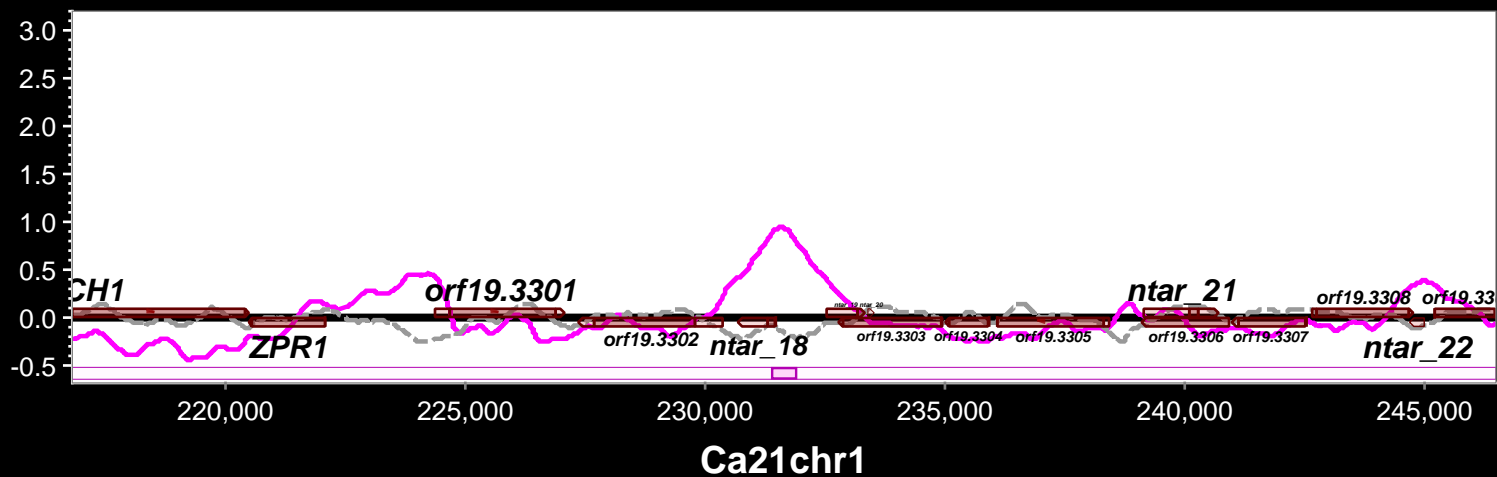

[0.939] Ca21chrR:572376-602059 [+] [orf19.2822, orf19.2821, orf19.2820, orf19.2819, orf19.2818]

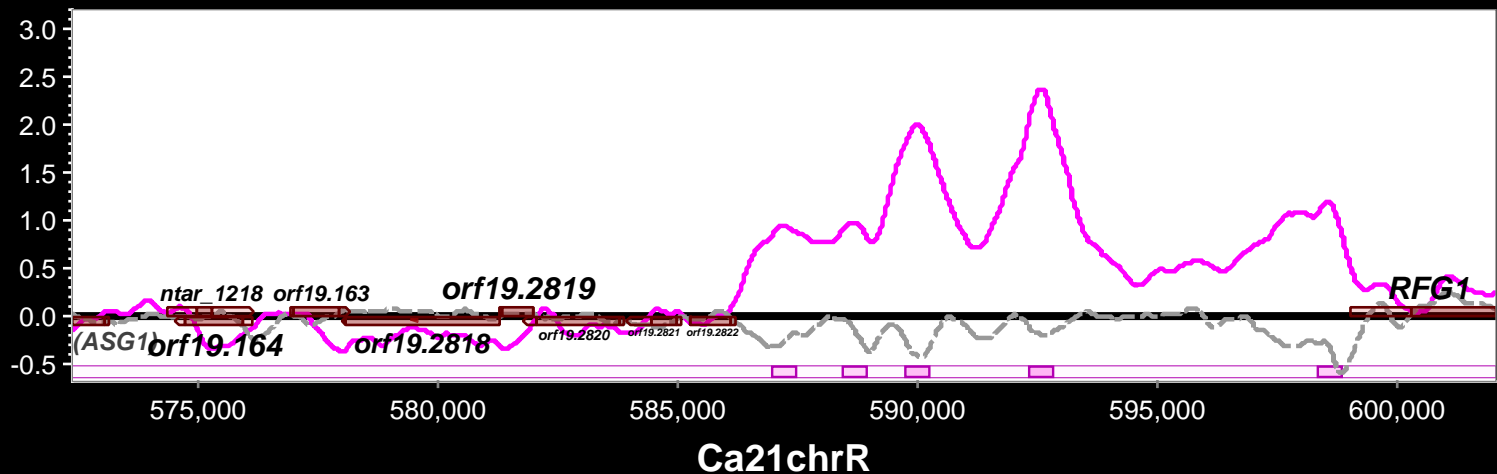

[0.938] Ca21chr2:747361-777044 [+] [FMO2, BMT8, orf19.861, IFK2, orf19.862]

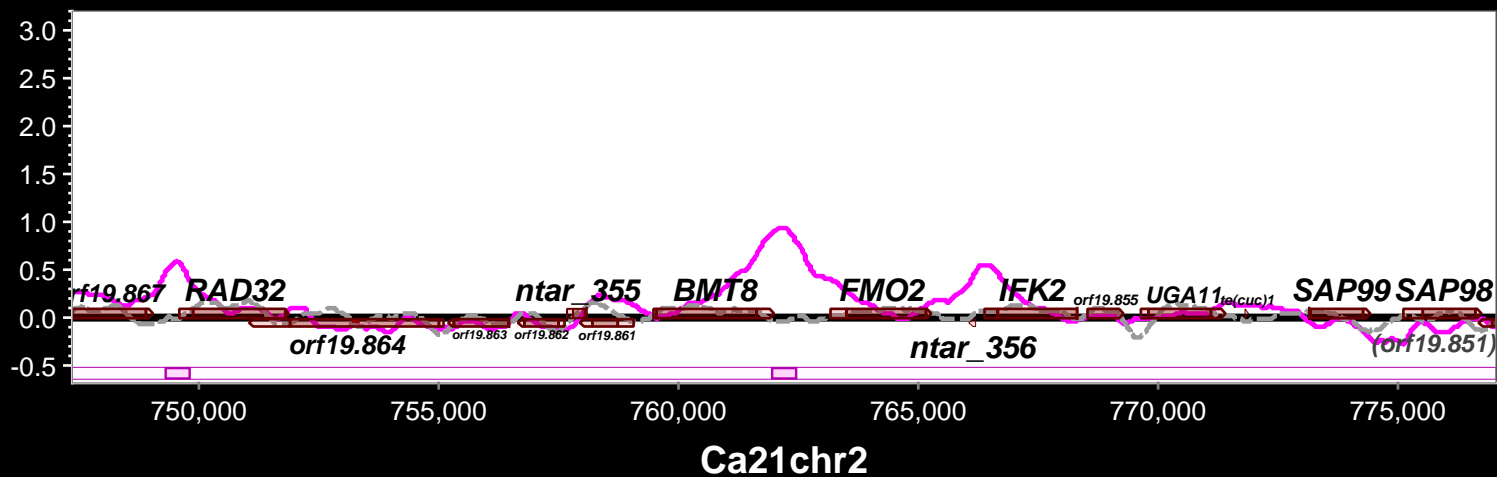

[0.934] Ca21chr7:774052-803735 [+] [orf19.6688, orf19.6687, ARG4, ENP2, orf19.6690]

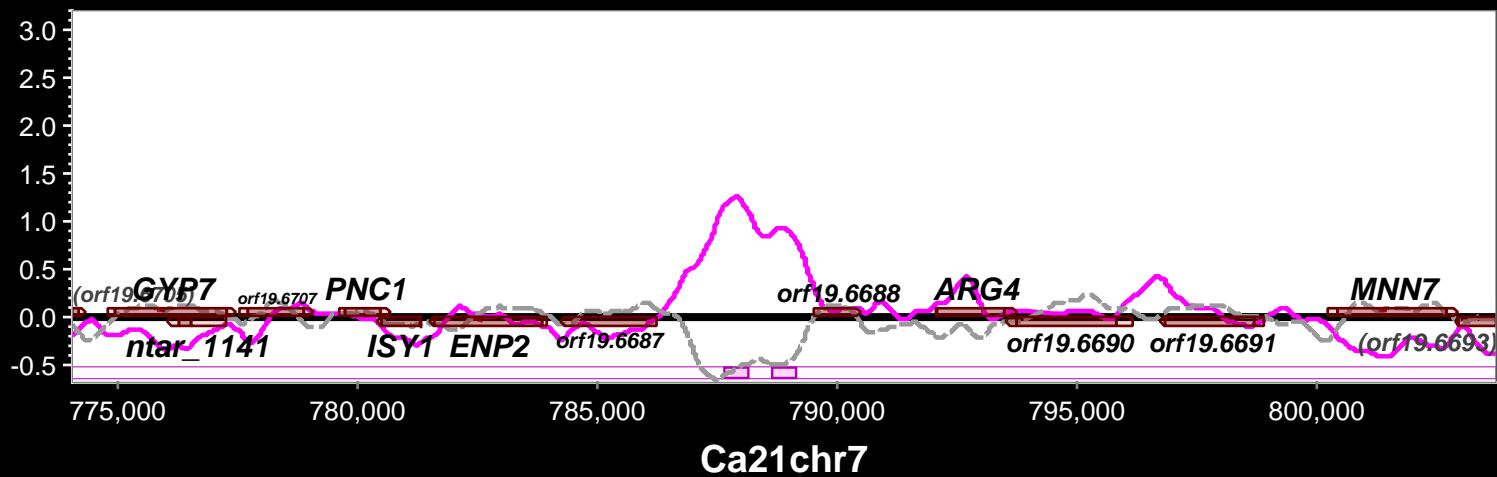

[0.934] Ca21chrR:1360420-1390103 [+] [orf19.721, BCR1, GST3, orf19.719, orf19.725]

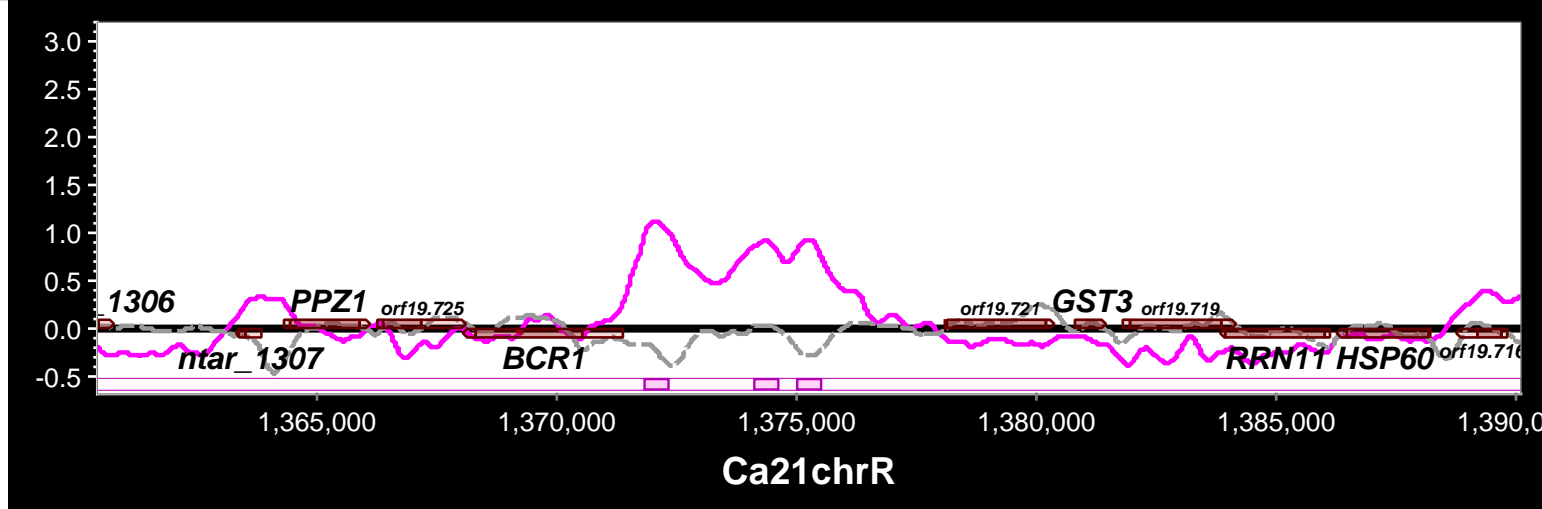

[0.933] Ca21chrR:1593949-1623632 [+] [KGD2, tk(UUU)2, LPD1, ACE2, MRPL8]

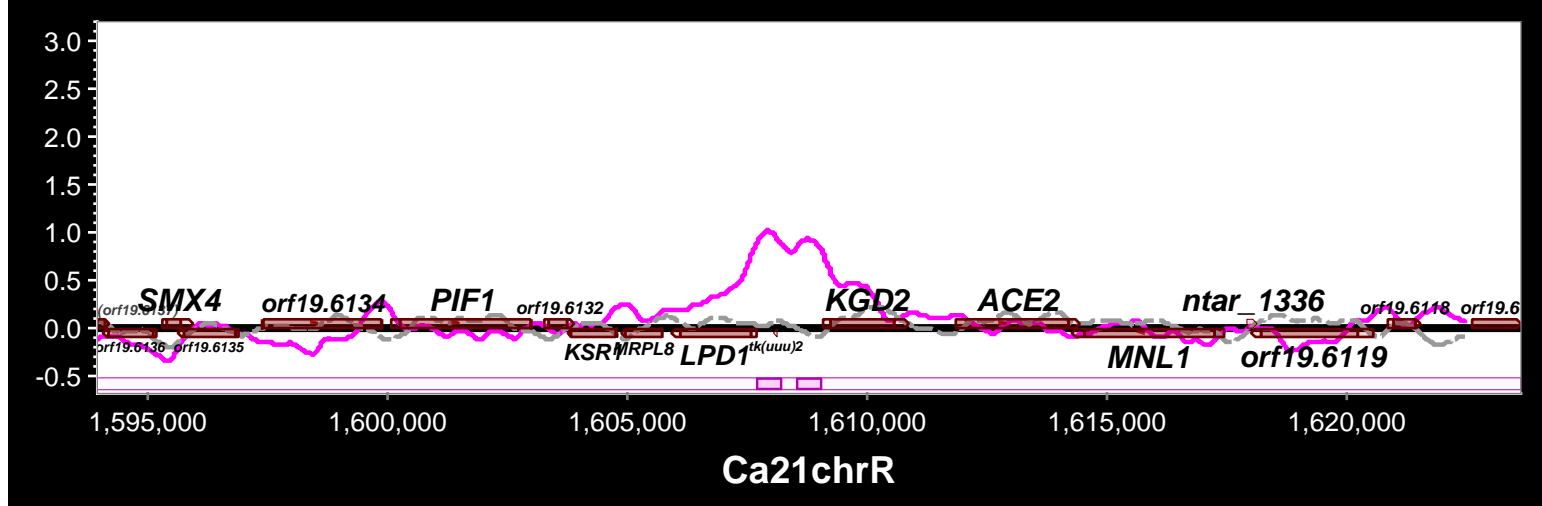

[0.932] Ca21chr2:1131910-1161593 [+] [ts(AGA)4, orf19.6874, orf19.6873.1, RPS8A, VPS35]

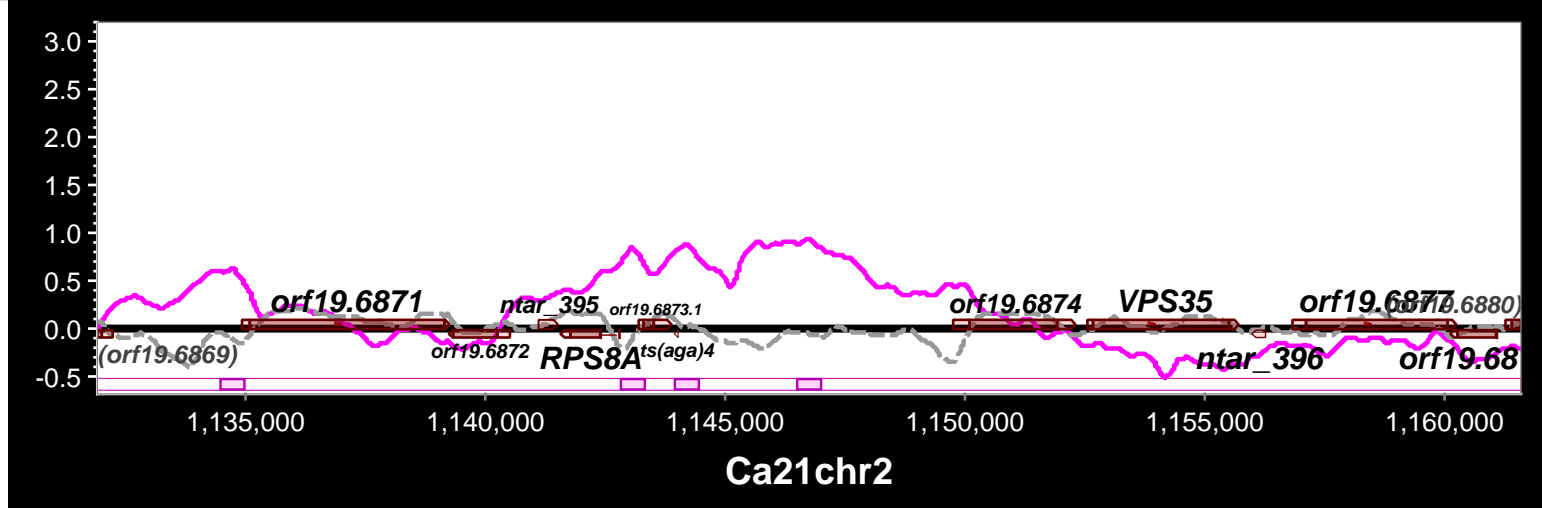

[0.925] Ca21chr3:1208057-1237740 [+] [orf19.6984, orf19.6983, TEA1, tV(AAC)5, tV(AAC)6]

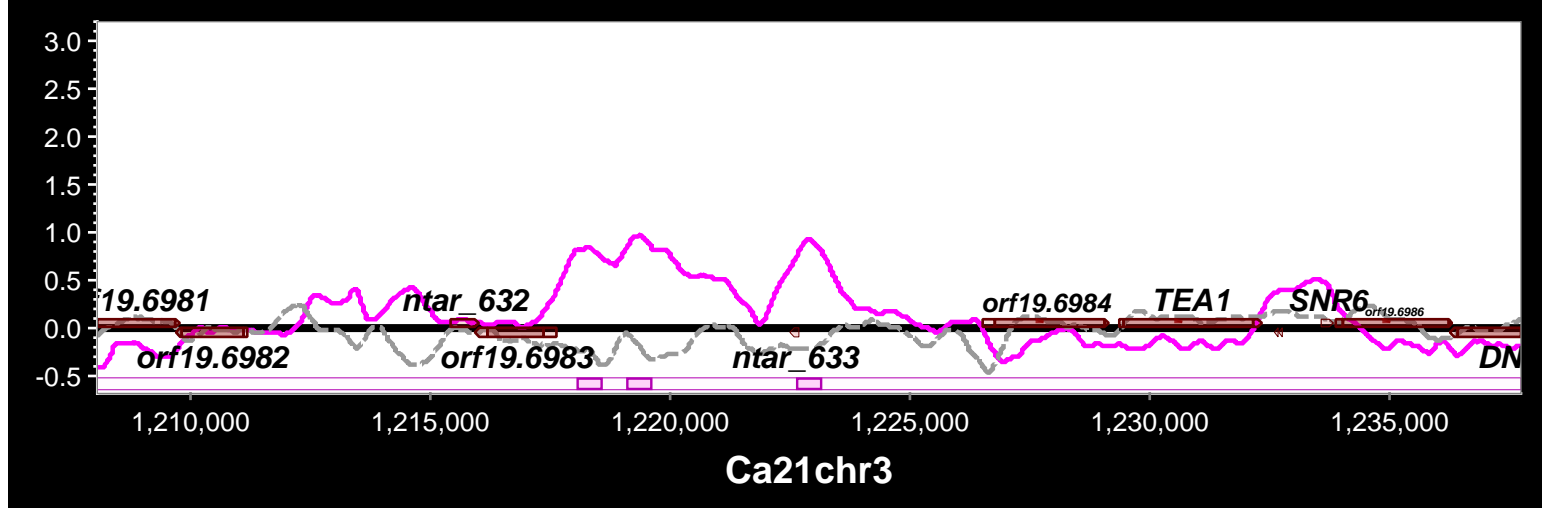

[0.919] Ca21chr1:329665-359348 [+] [LSC1, ARP8, orf19.3357, ESP1, orf19.3360]

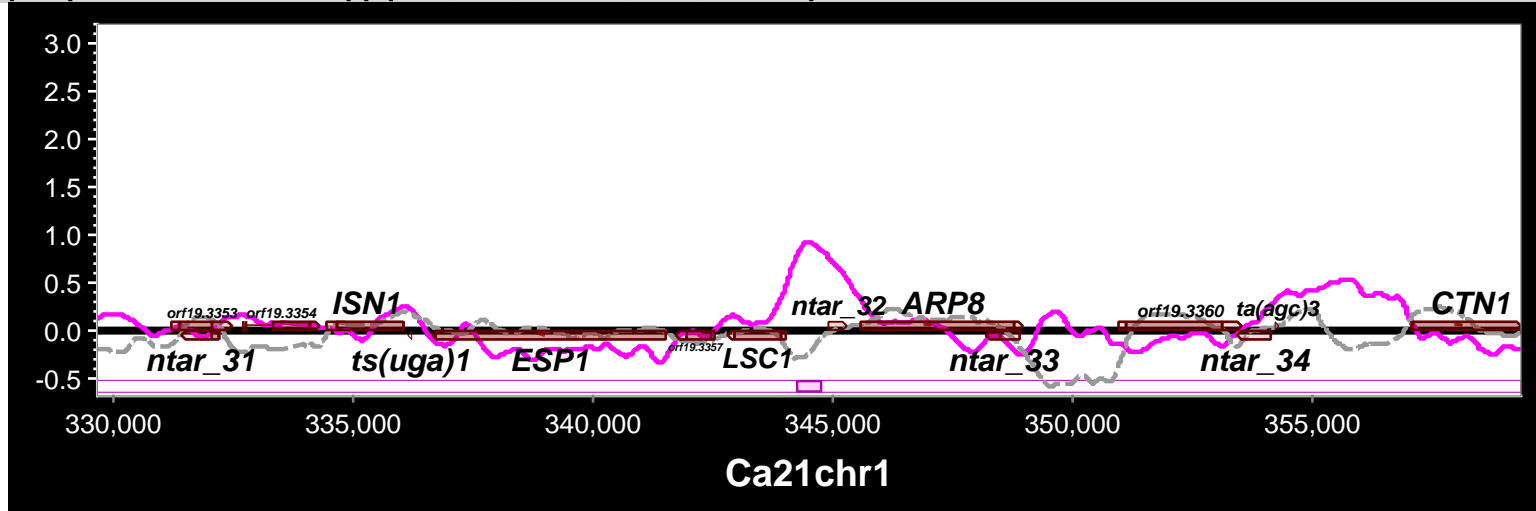

[0.917] Ca21chr2:1623080-1652763 [+] [orf19.2178.1, SIT1, orf19.2178, orf19.2177, RPS10]

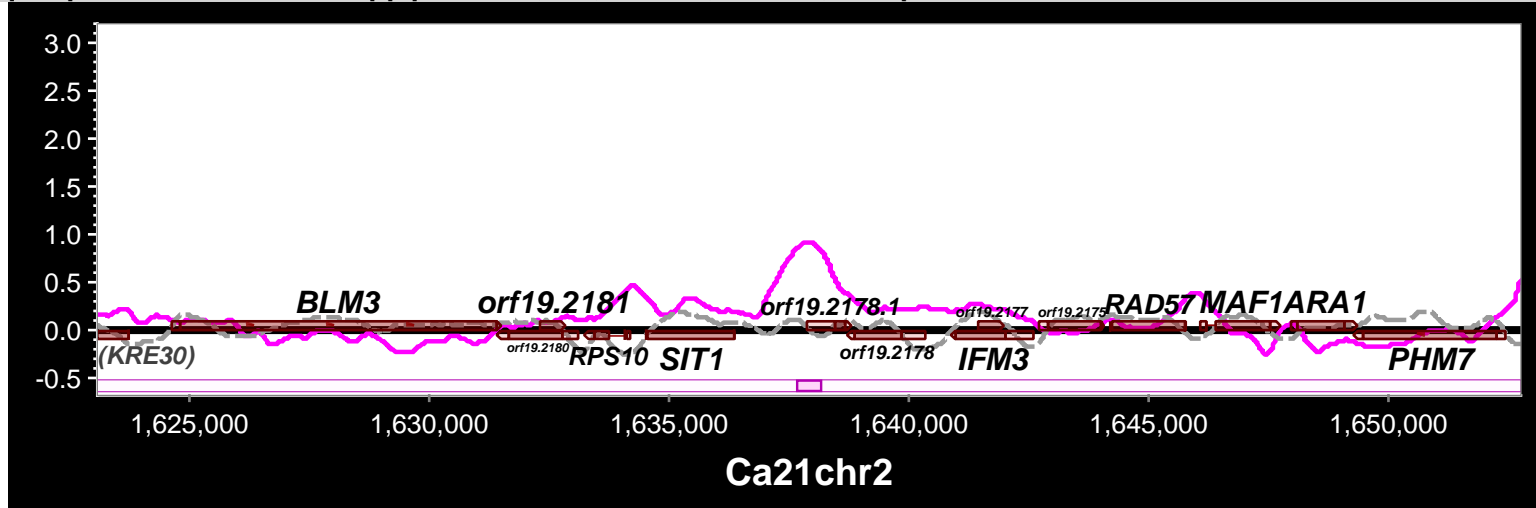

[0.912] Ca21chr3:988790-1018473 [+] [orf19.5933, orf19.5934, orf19.5935, orf19.5932, orf19.5931]

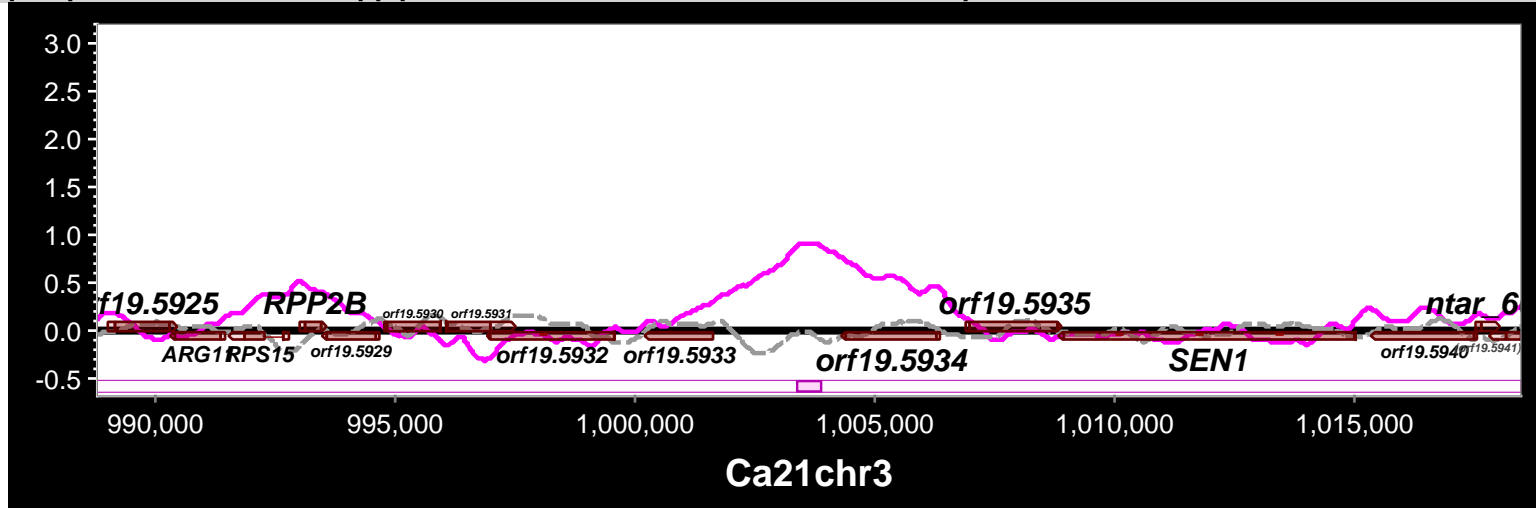

[0.912] Ca21chrR:1359527-1389210 [+] [orf19.721, BCR1, GST3, orf19.719, orf19.725]

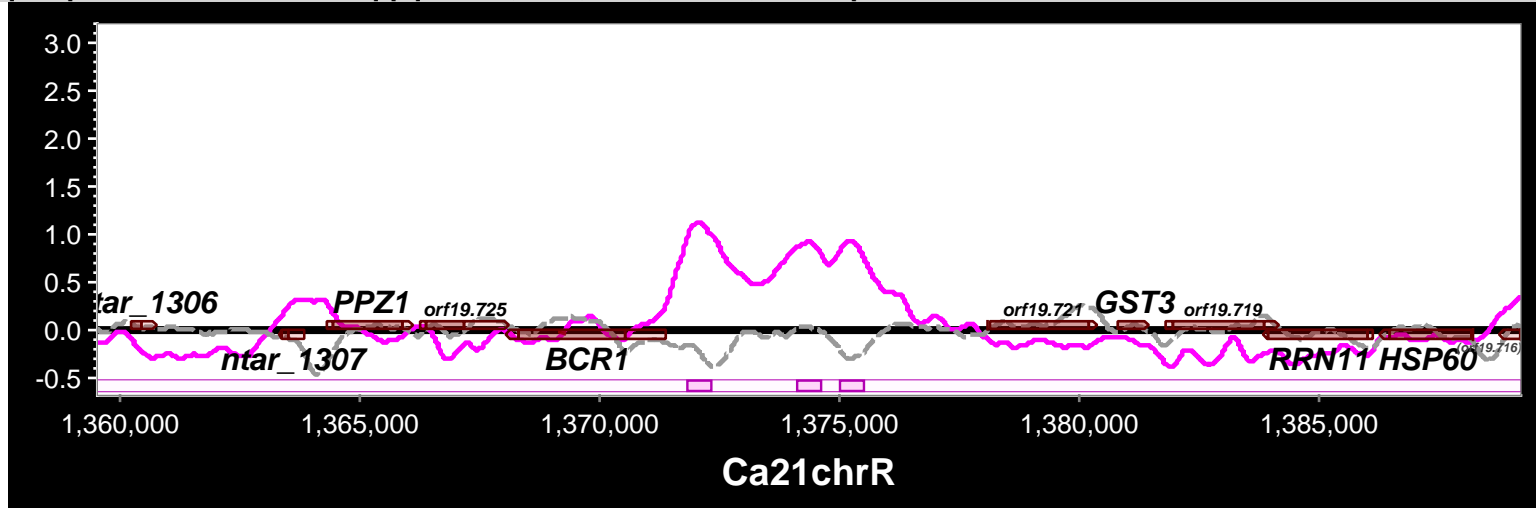

[0.911] Ca21chr2:3661-33344 [+] [orf19.1906, EMC9, NDT80, LEU5, orf19.1910]

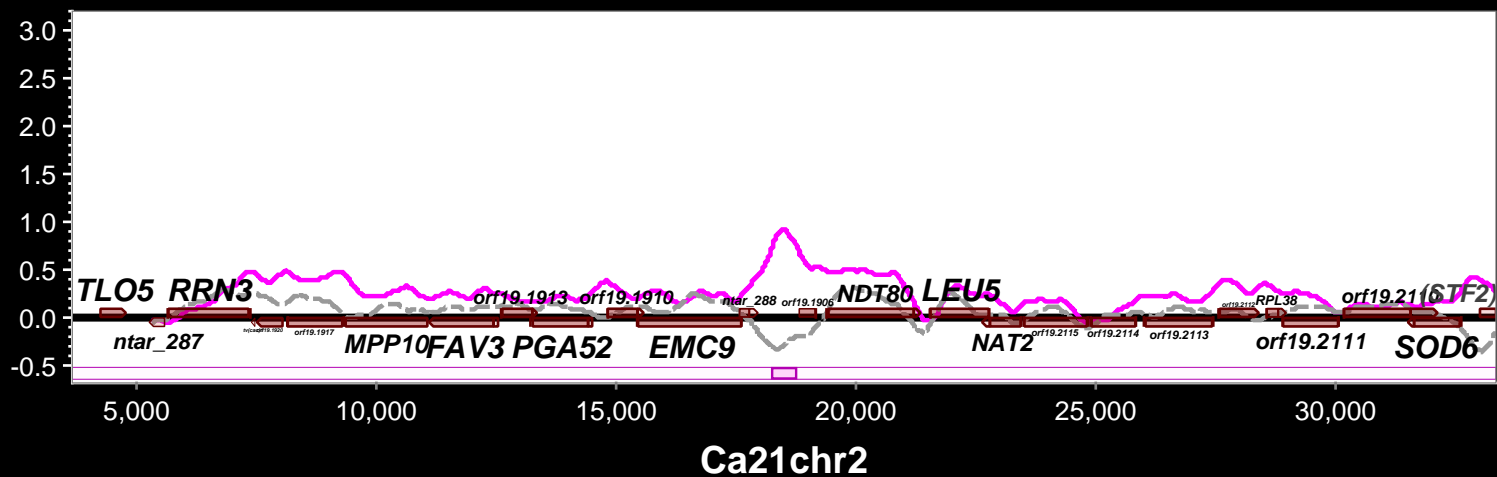

[0.909] Ca21chr6:732540-762223 [+] [orf19.5717, SAP4, orf19.5718, SAP1, orf19.5719]

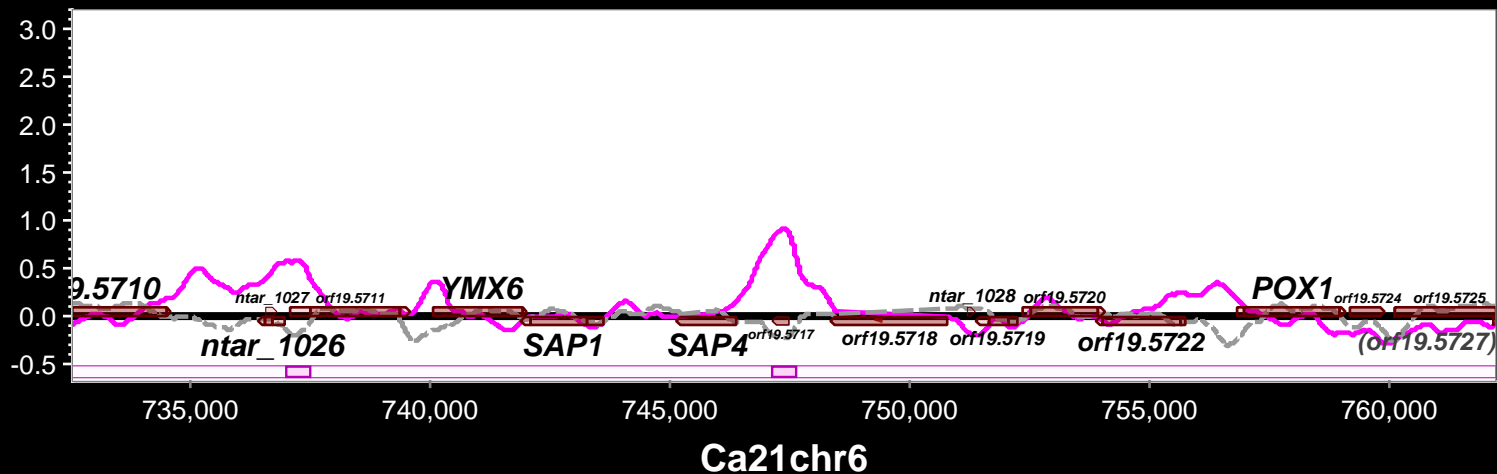

[0.906] Ca21chr4:431406-461089 [+] [BGL2, orf19.4563, orf19.4566, BFR1, orf19.4567]

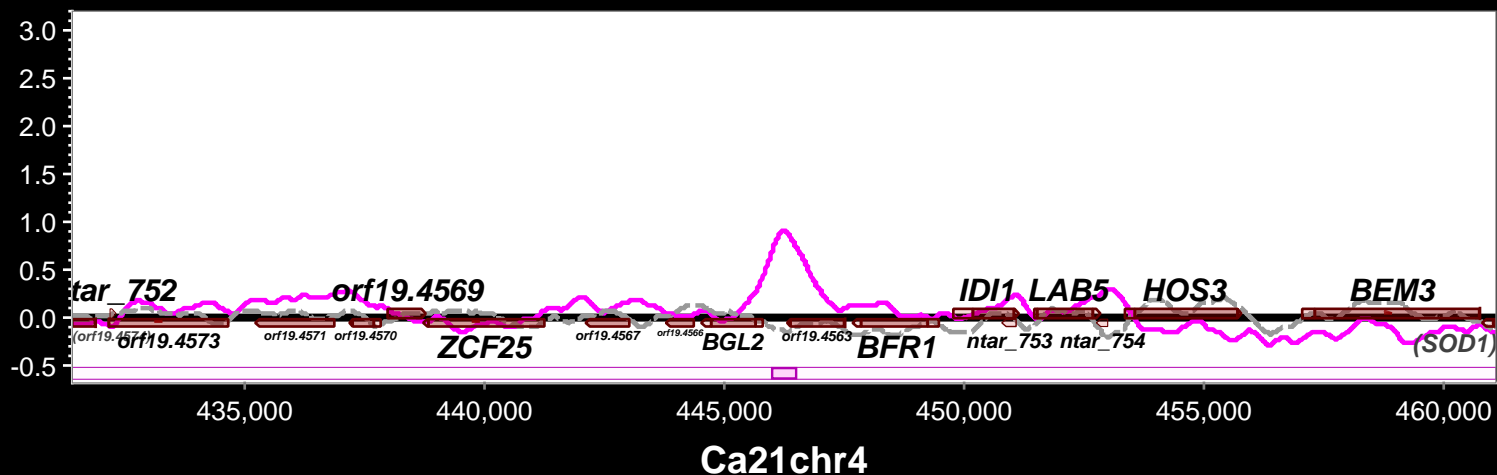

[0.903] Ca21chrR:1674299-1703982 [+] [YHB1, SAP2, orf19.3706, PTC6, orf19.3704.1]

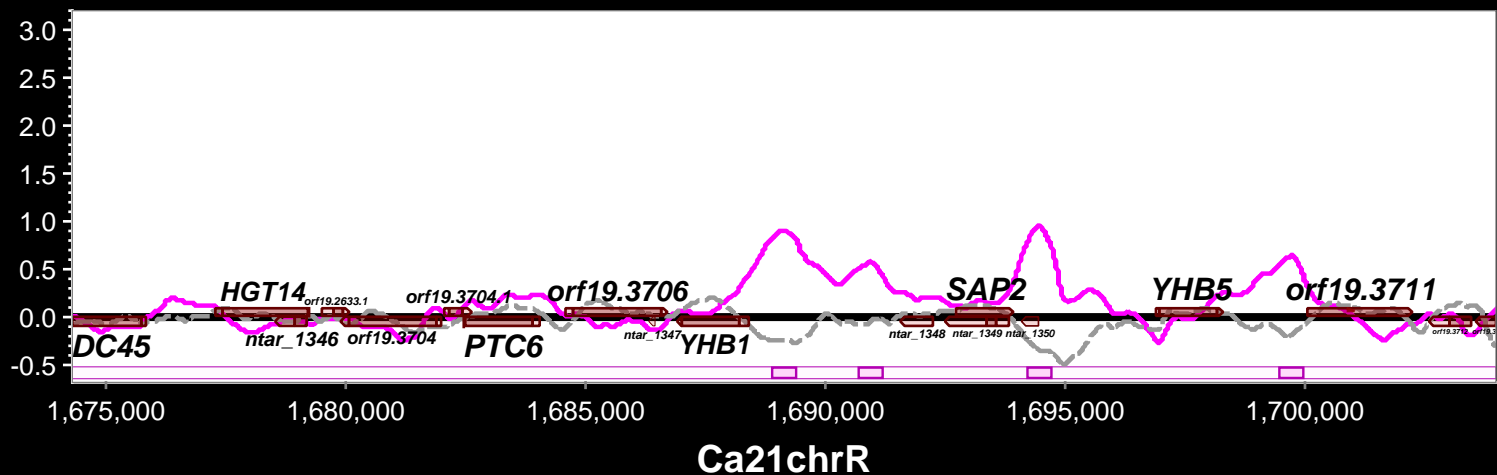

[0.899] Ca21chr1:652553-682236 [+] [ECM33, ARO80, orf19.3010, CDC12, orf19.3009]

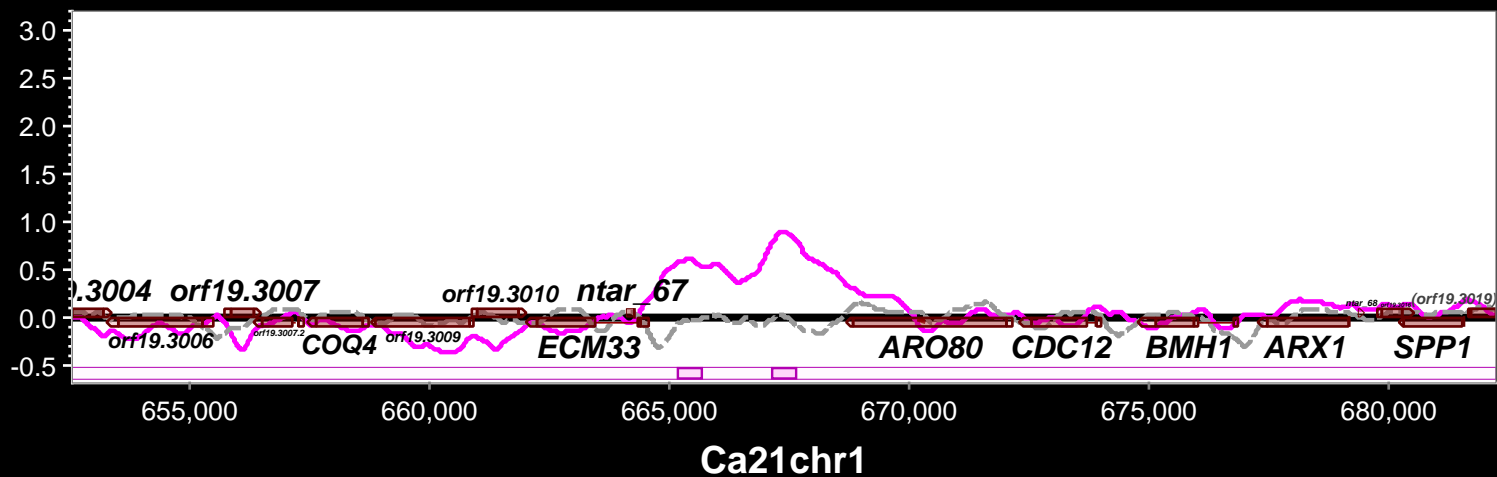

[0.894] Ca21chr1:1800144-1829827 [+] [orf19.5105, DIP2, NOT5, LTP1, orf19.5103]

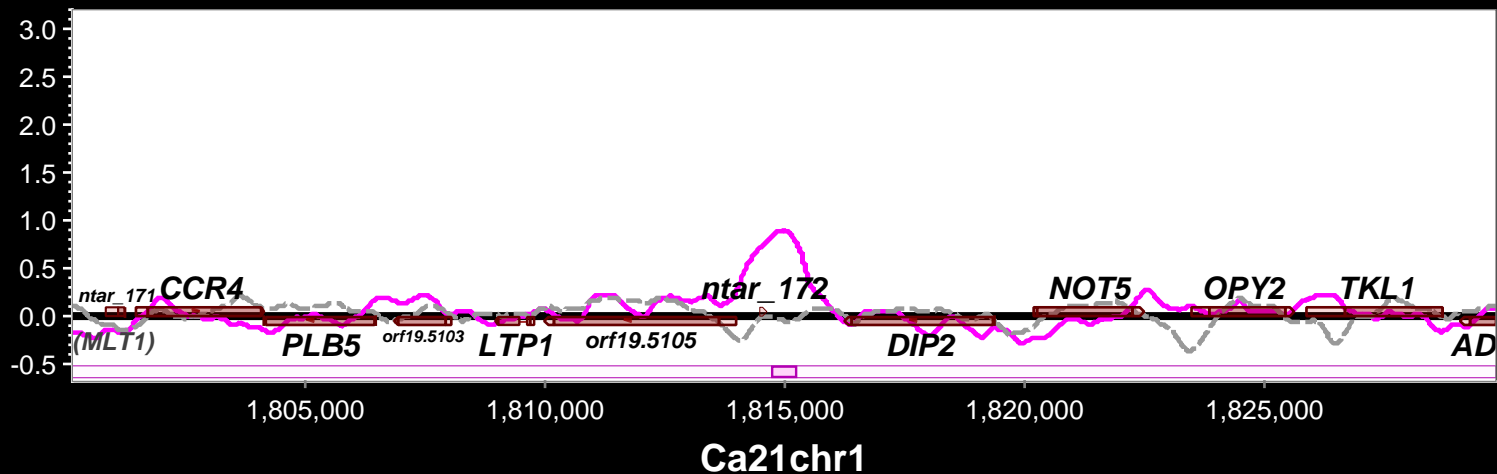

[0.887] Ca21chr6:567778-597461 [+] [orf19.5556, MNN4-4, orf19.5555, RBF1, orf19.5553]

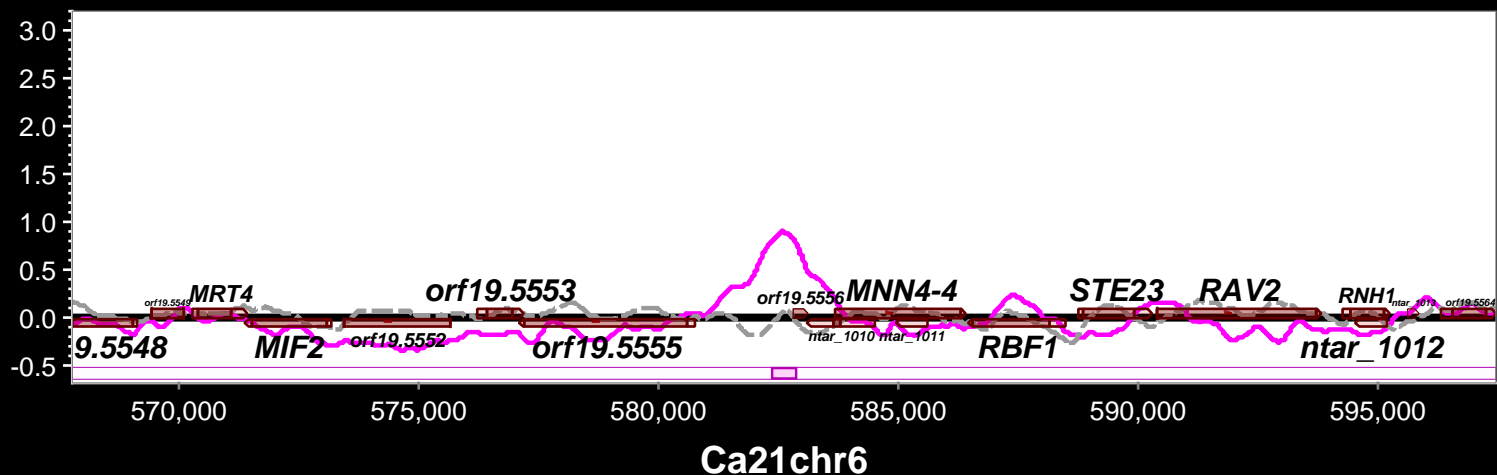

[0.885] Ca21chr1:2796801-2826484 [+] [orf19.4921.1, orf19.4922, orf19.4921, orf19.4923, orf19.4923.1]

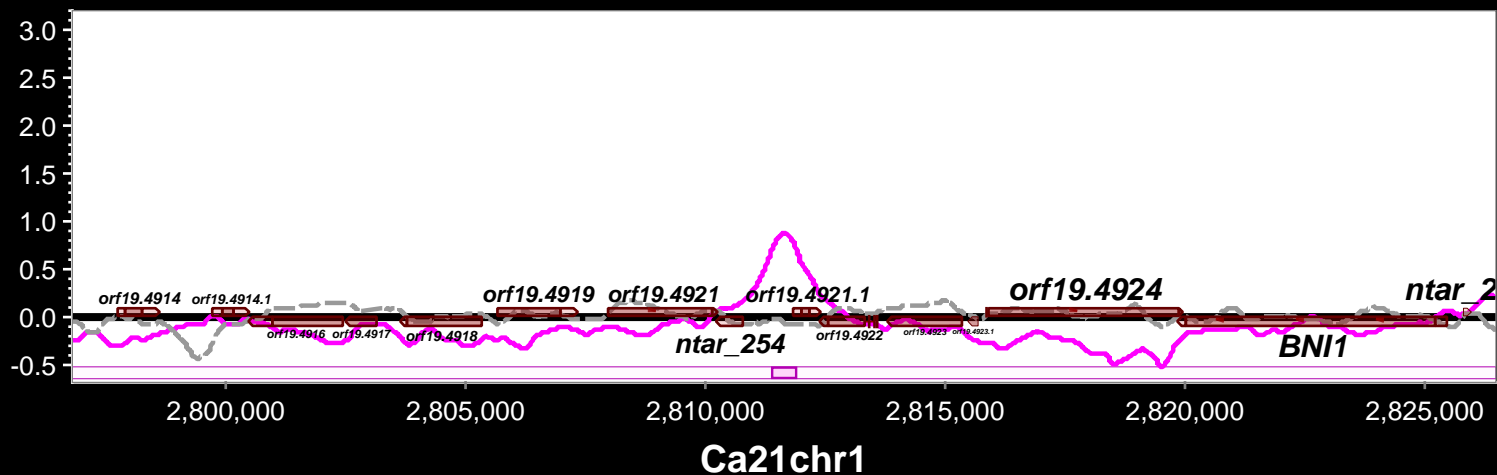

[0.877] Ca21chr3:695710-725393 [+] [orf19.334, orf19.335, FCY2, YAH1, tE(UUC)1]

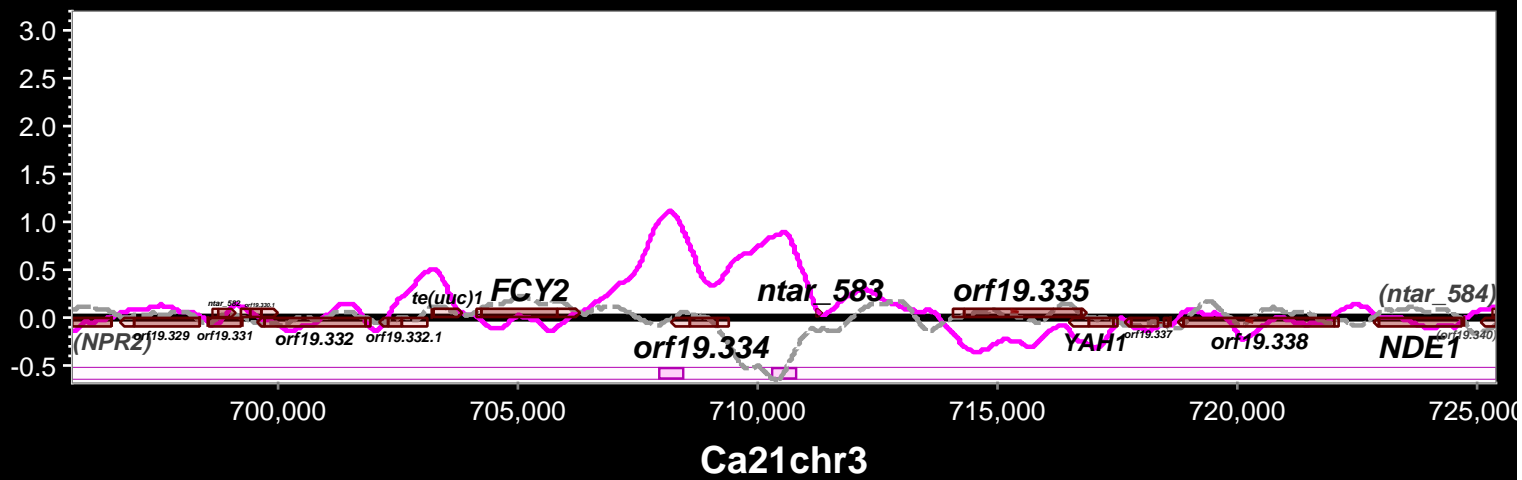

[0.871] Ca21chr1:628219-657902 [+] [RPS1, TEM1, ORC1, orf19.3003, TSR2]

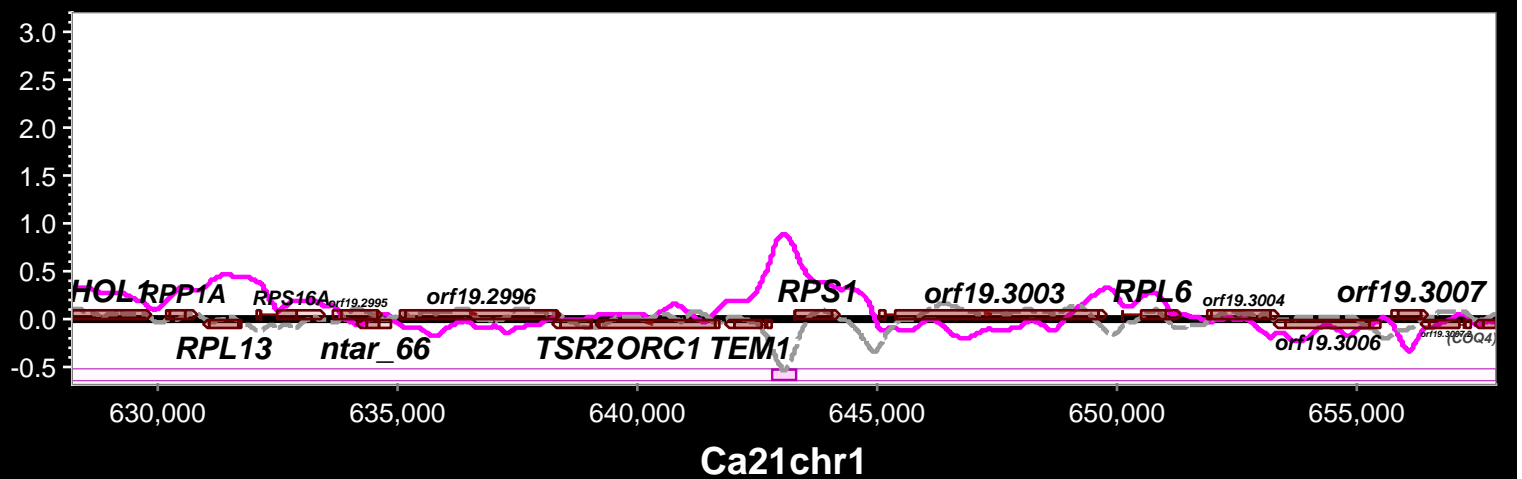

[0.869] Ca21chr2:1129361-1159044 [+] [tS(AGA)4, orf19.6873.1, RPS8A, orf19.6872, orf19.6874]

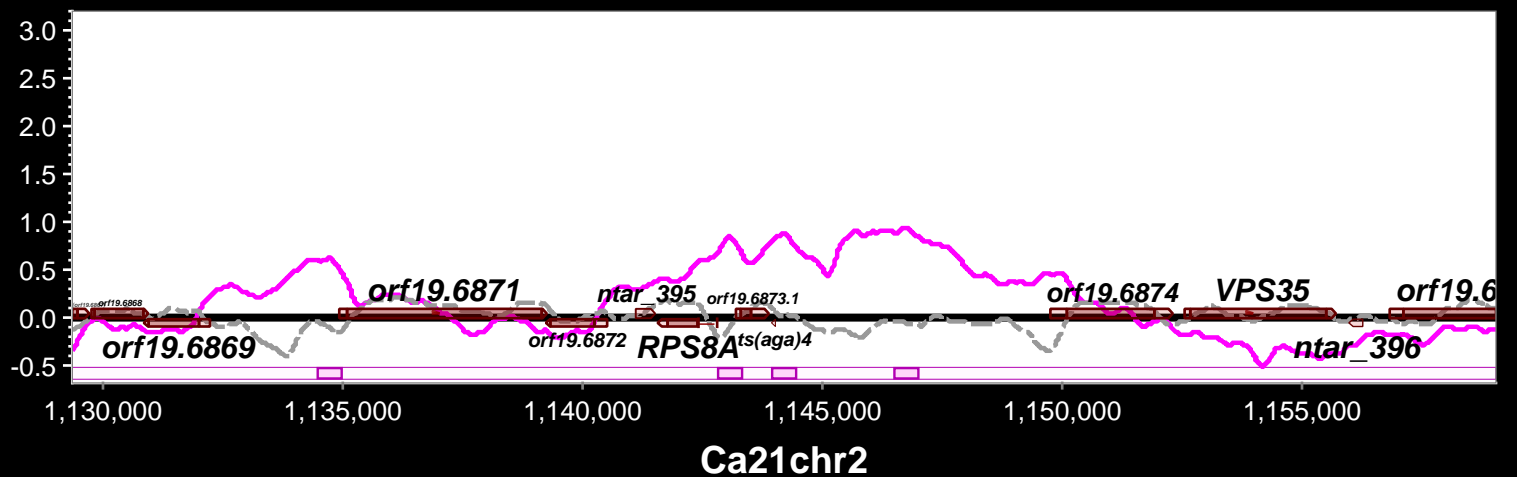

[0.868] Ca21chr1:284141-313824 [+] [orf19.3337, orf19.3338, SOD2, orf19.3335, RPS21]

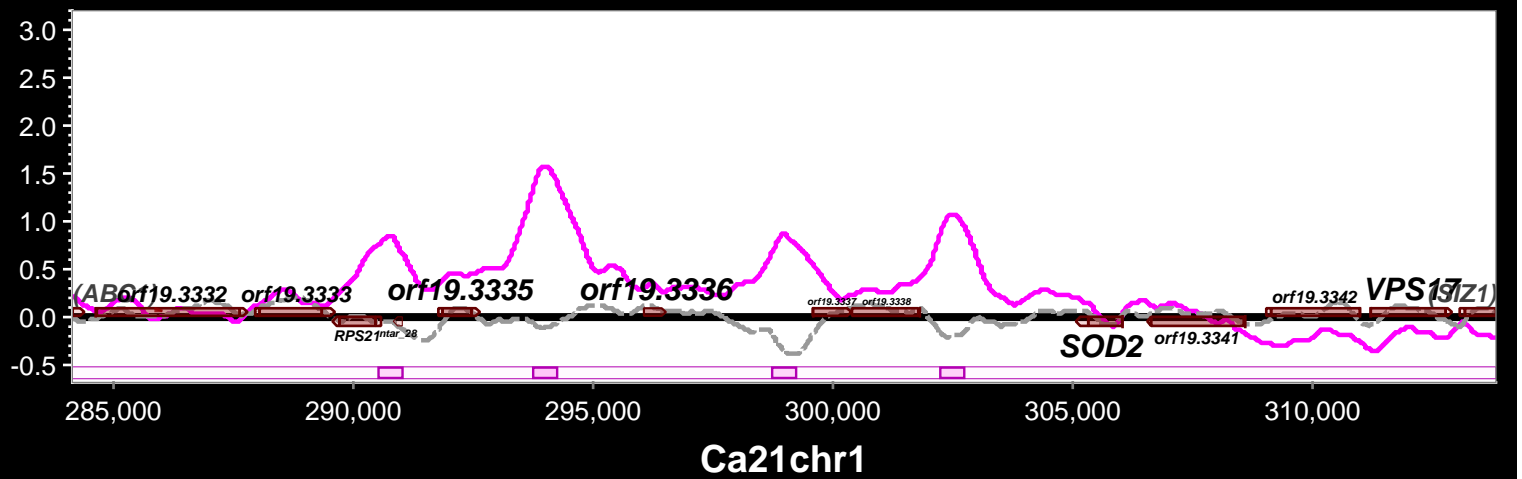

[0.868] Ca21chrR:1142524-1172207 [+] [PST3, YCP4, tR(ACG)2, tR(ACG)1, orf19.5284]

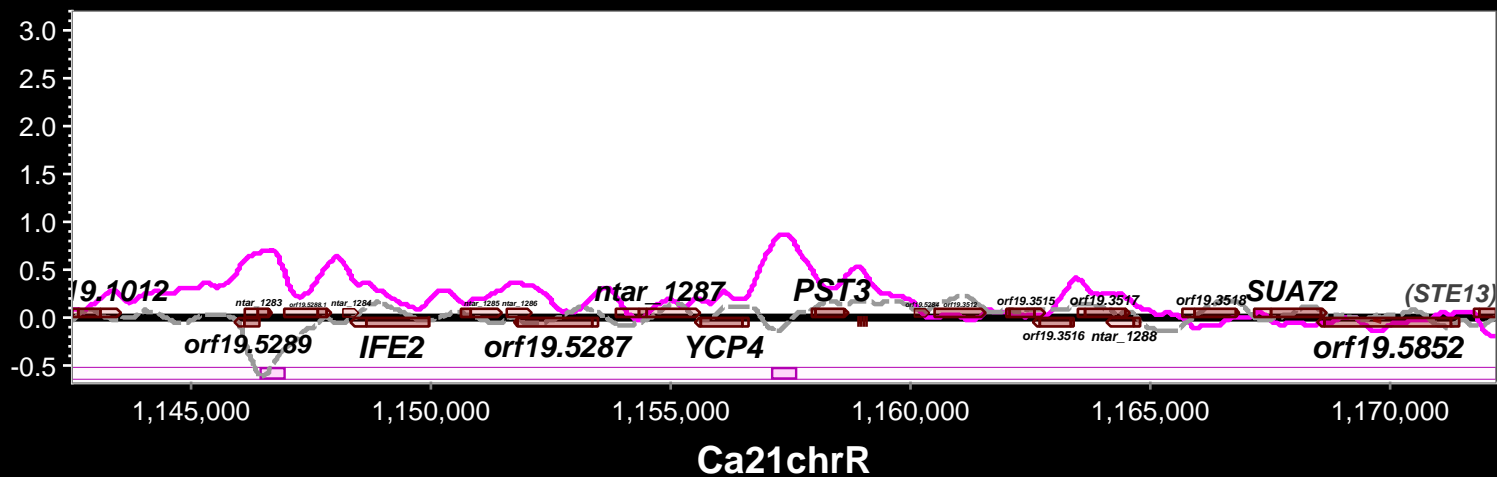

[0.865] Ca21chr7:436833-466516 [+] [CUP9, EXO70, LIG1, GRX1, orf19.6509]

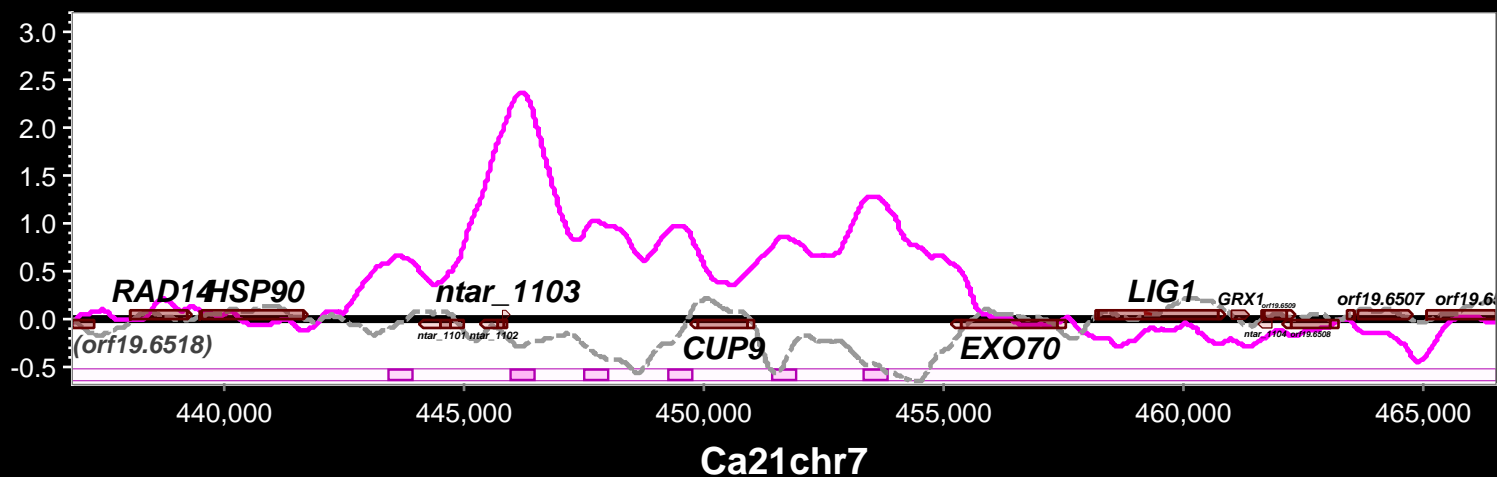

[0.864] Ca21chrR:1801539-1831222 [+] [orf19.6408, orf19.6407, orf19.6406, orf19.6411, tI(AAU)5]

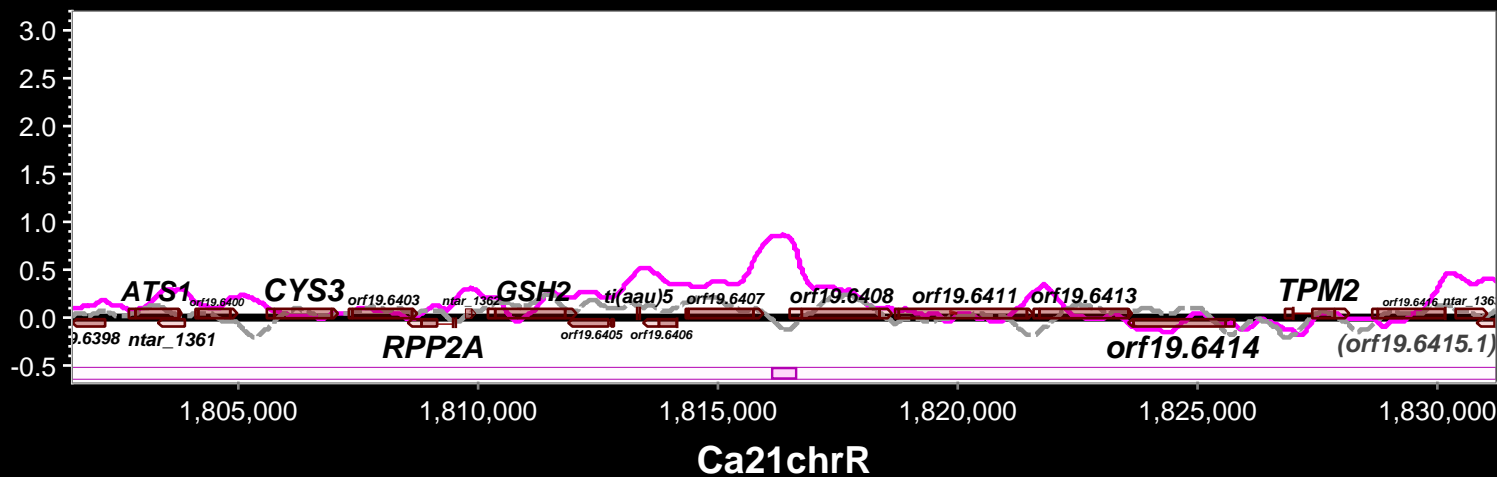

[0.861] Ca21chr5:1102701-1132384 [+] [orf19.4000, orf19.4001, DUN1, orf19.3999, orf19.3998]

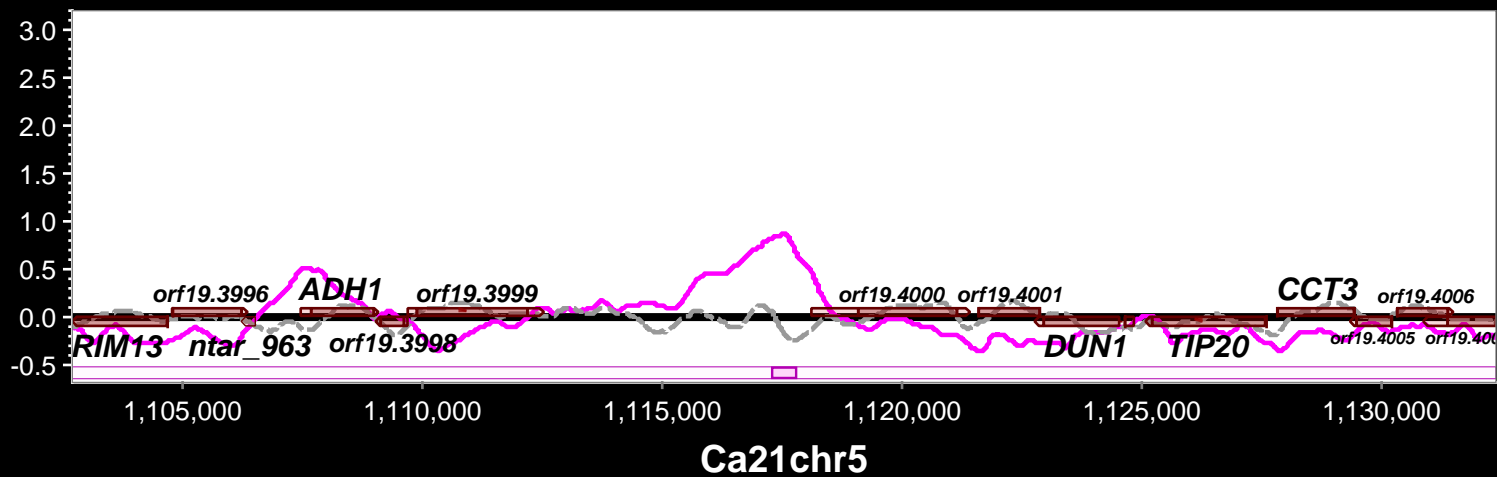



[0.857] Ca21chr1:932361-962044 [+] [orf19.6852.1, orf19.6853, ATP1, orf19.6852, CHL4]

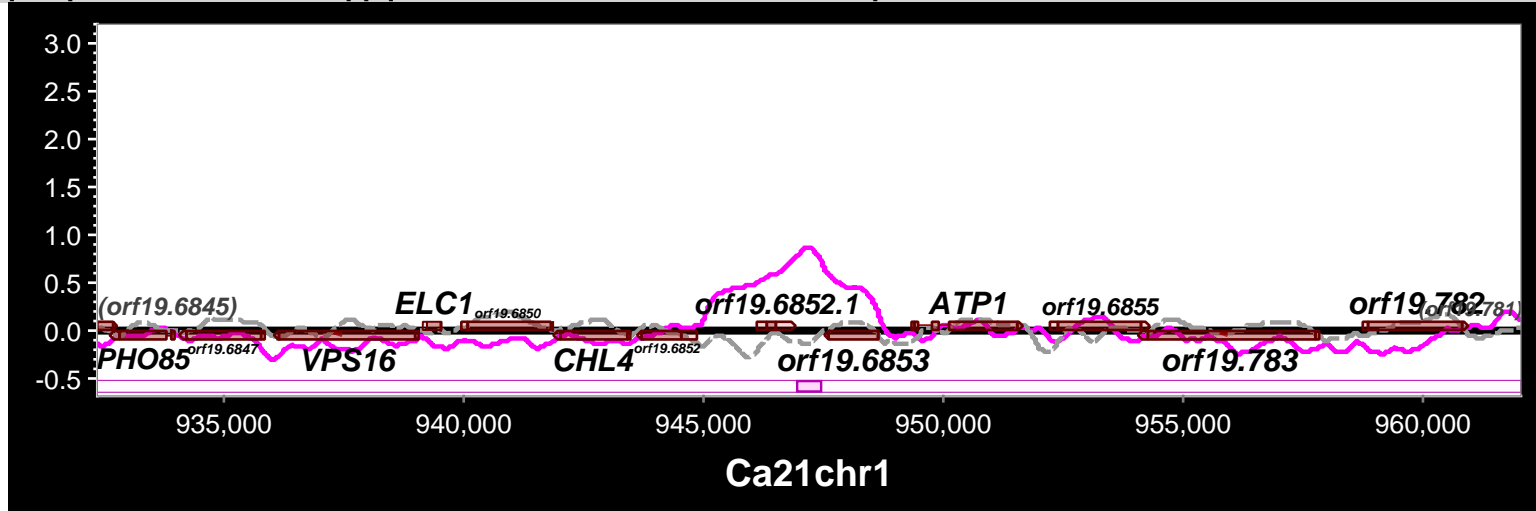

[0.855] Ca21chr6:64556-94239 [+] [orf19.4214, FET34, FET31, orf19.1204, orf19.1203.1]

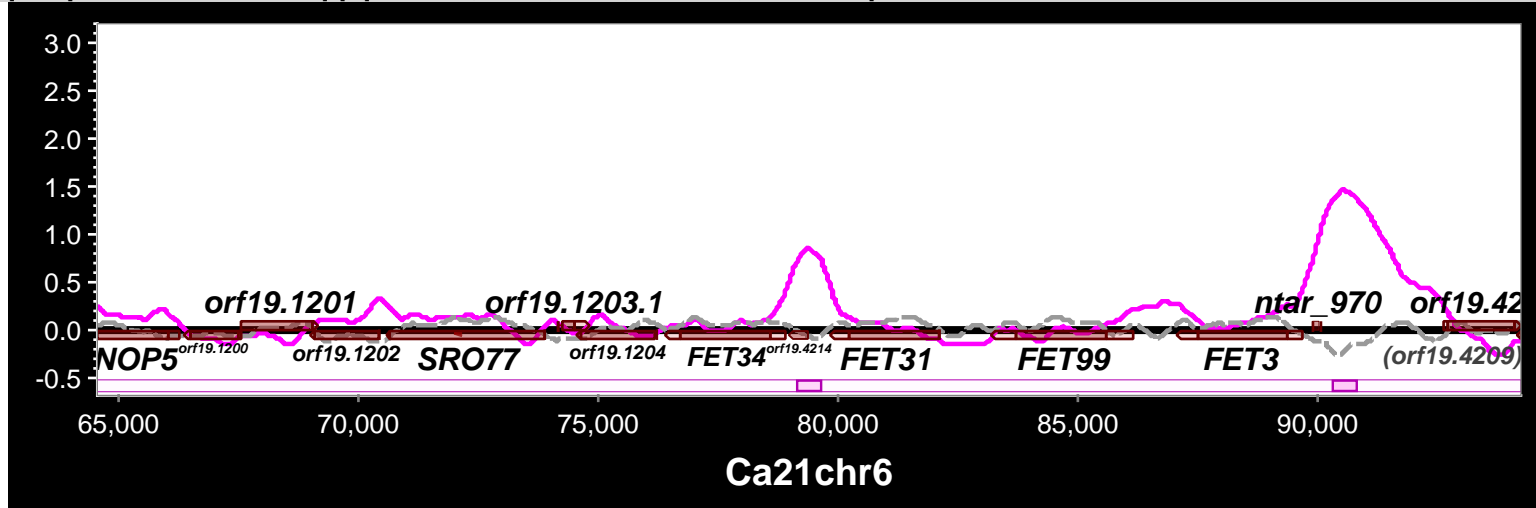

[0.853] Ca21chr3:1456459-1486142 [+] [th(GUG)3, GLG2, AAF1, orf19.7433, ECM15]

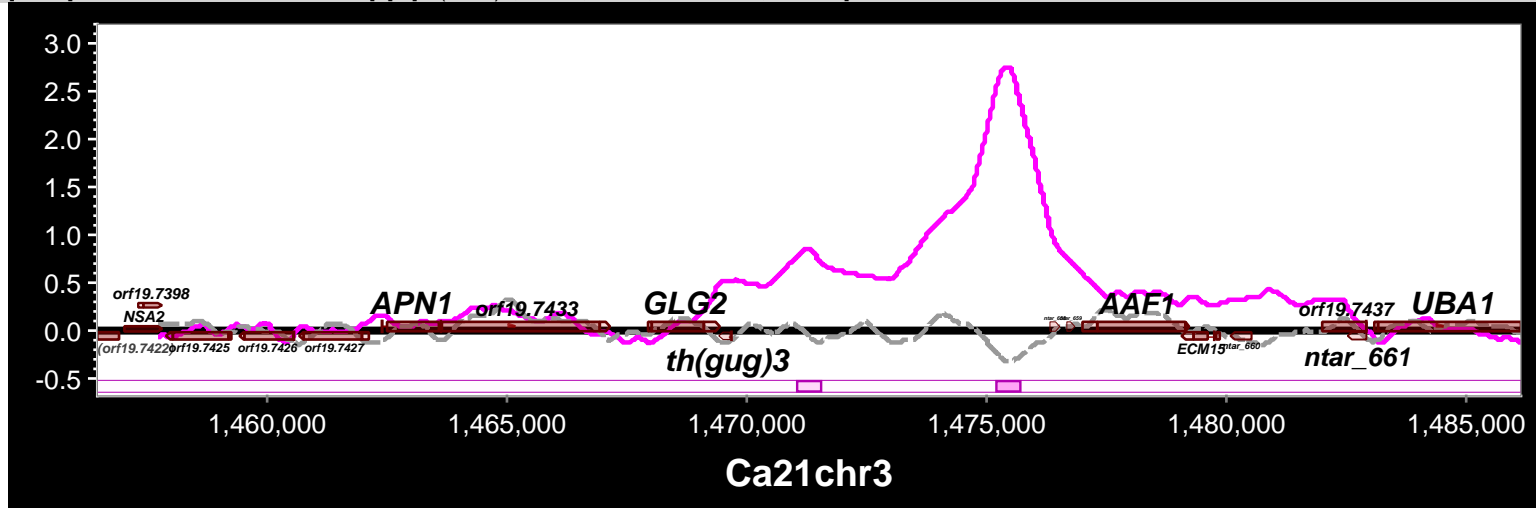

[0.852] Ca21chr1:275934-305617 [+] [RPS21, orf19.3335, orf19.3333, orf19.3332, ABC1]

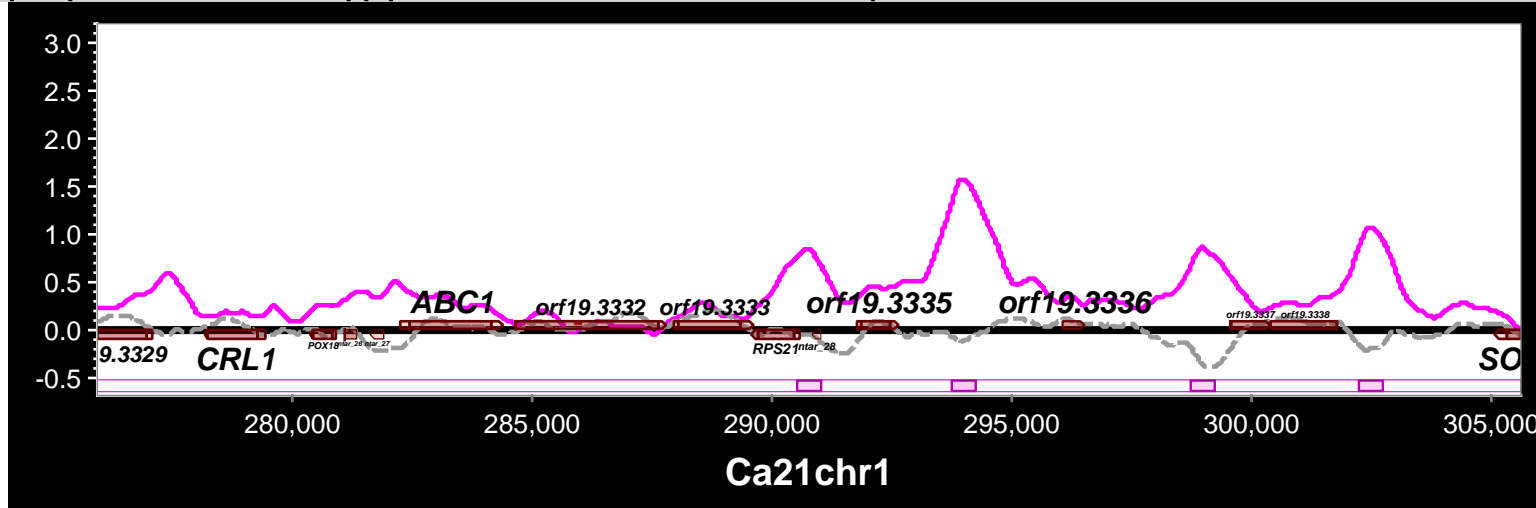

[0.852] Ca21chr4:549866-579549 [+] [orf19.2725, orf19.2726, GRX3, orf19.2724, orf19.2728]

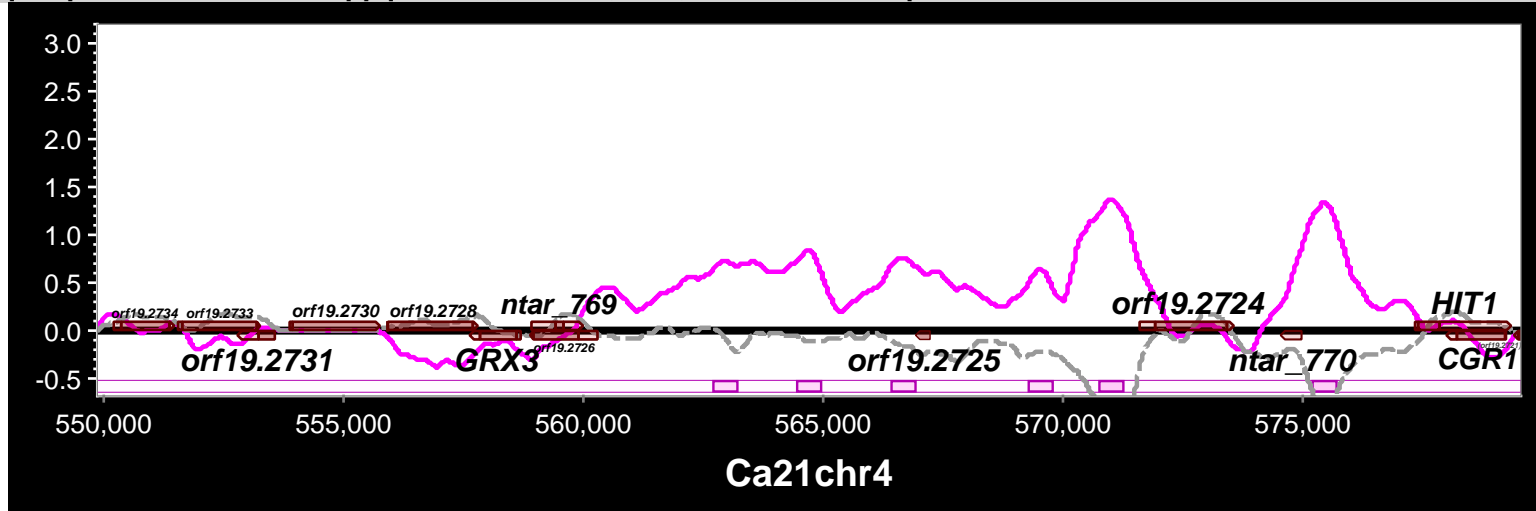

[0.848] Ca21chr2:814770-844453 [+] [orf19.828, SCH9, RPL39, orf19.827, orf19.831]

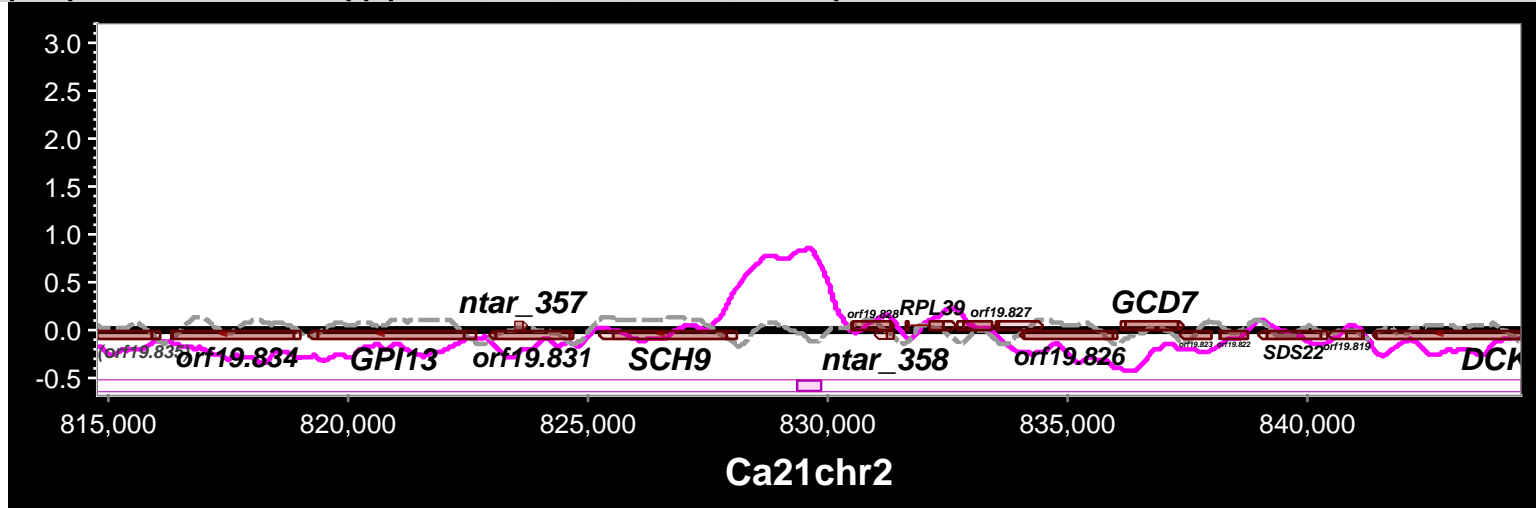

[0.848] Ca21chr6:948546-978229 [+] [FLO8, orf19.1095, orf19.1096, orf19.1092, ALS2]

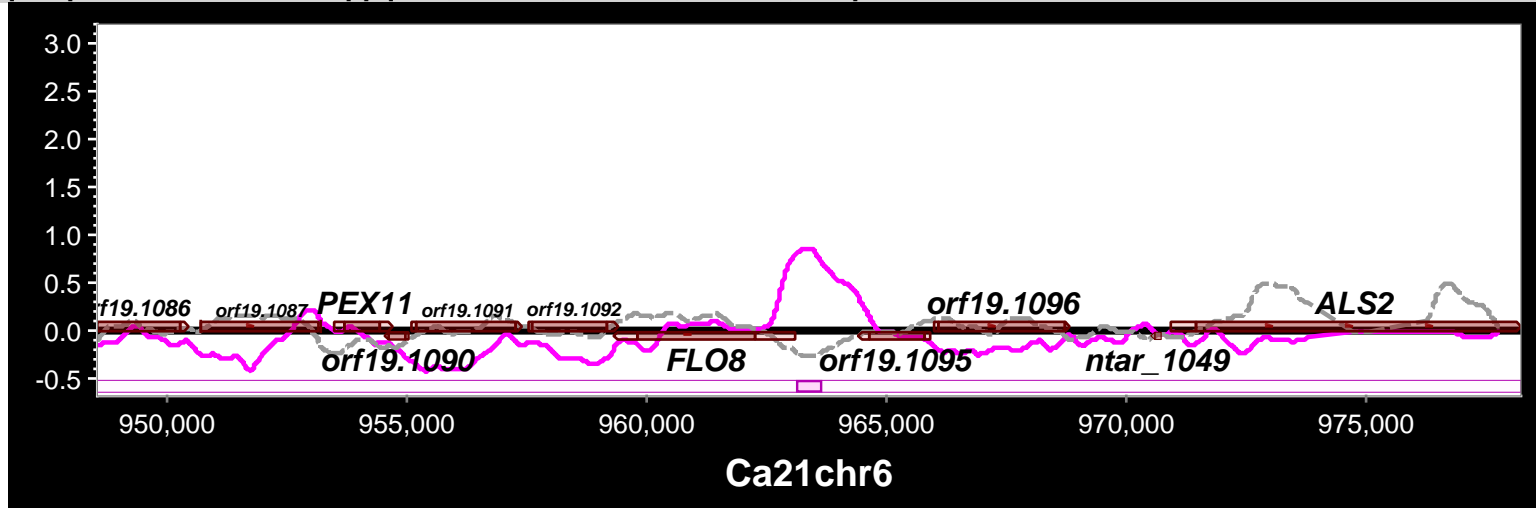

[0.843] Ca21chr3:1203480-1233163 [+] [orf19.6983, orf19.6982, orf19.6984, orf19.6981, TEA1]

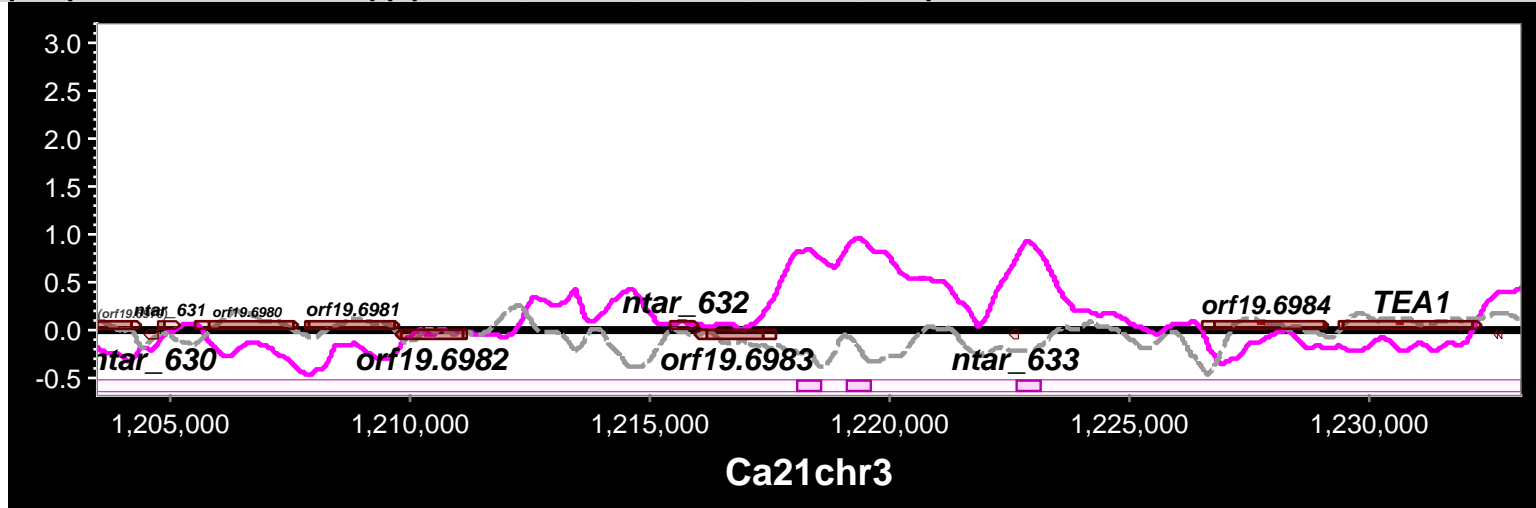

[0.841] Ca21chr2:1128234-1157917 [+] [orf19.6873.1, RPS8A, tS(AGA)4, orf19.6872, orf19.6874]

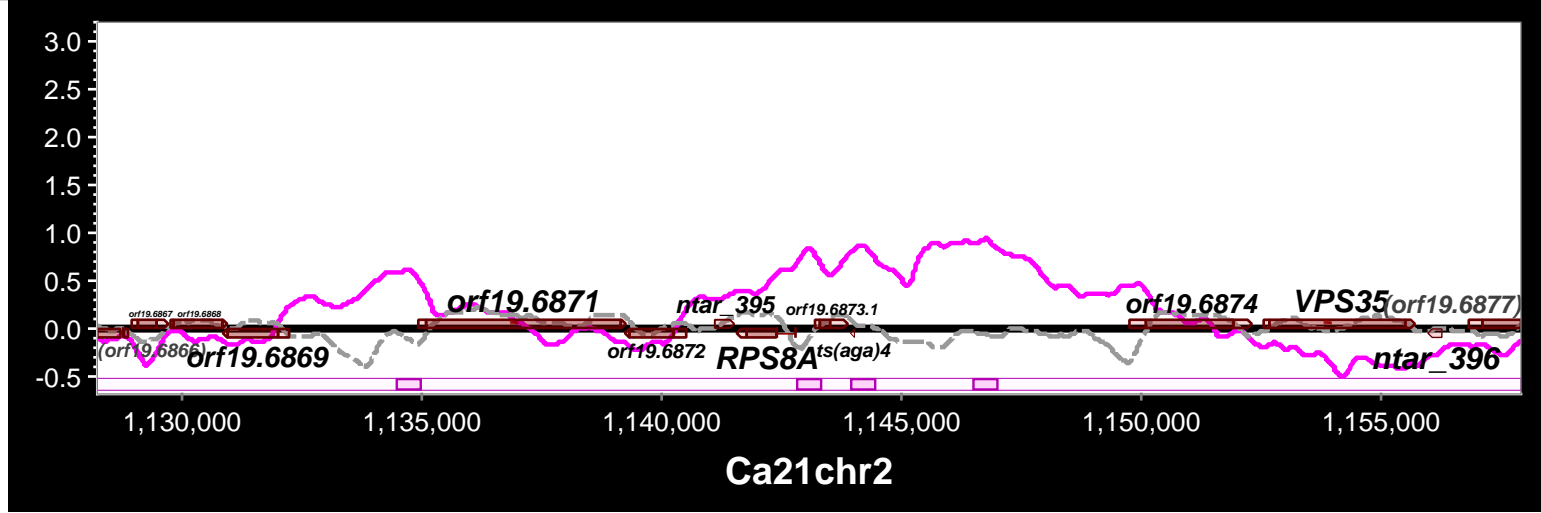

[0.835] Ca21chr1:2836764-2866447 [+] [orf19.4936, OP4, orf19.4936.1, FAD3, orf19.4932]

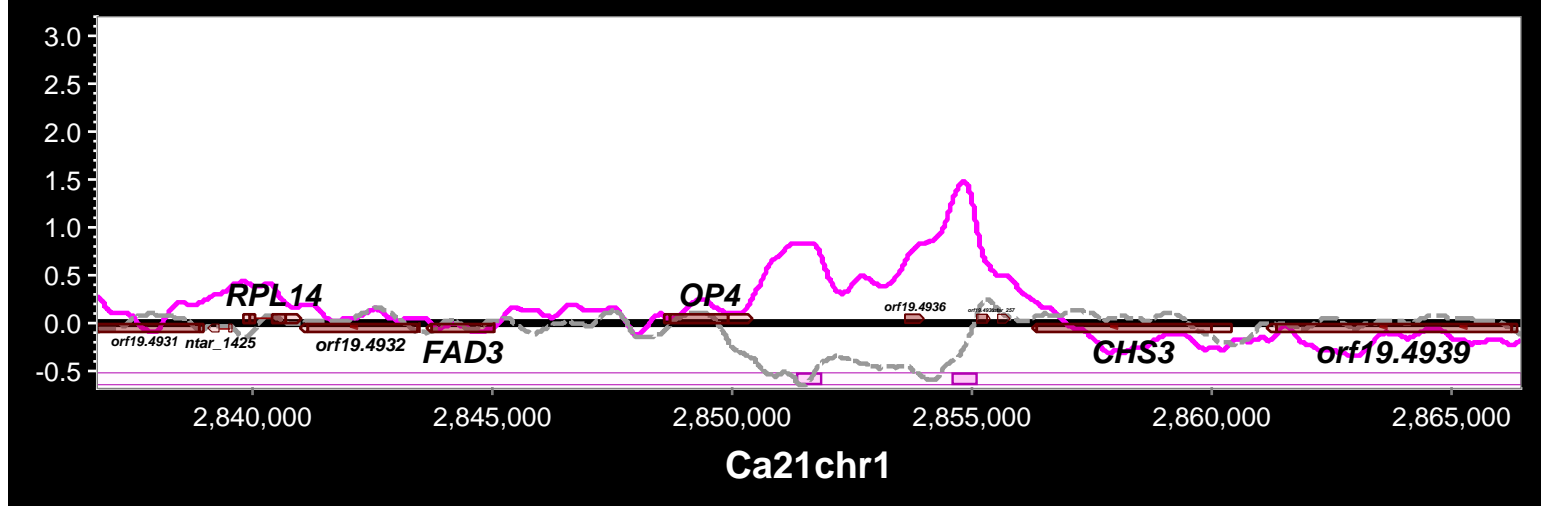

[0.834] Ca21chr2:1067505-1097188 [+] [orf19.3555, AAT1, orf19.3556, tQ(UUG)3, RPF2]

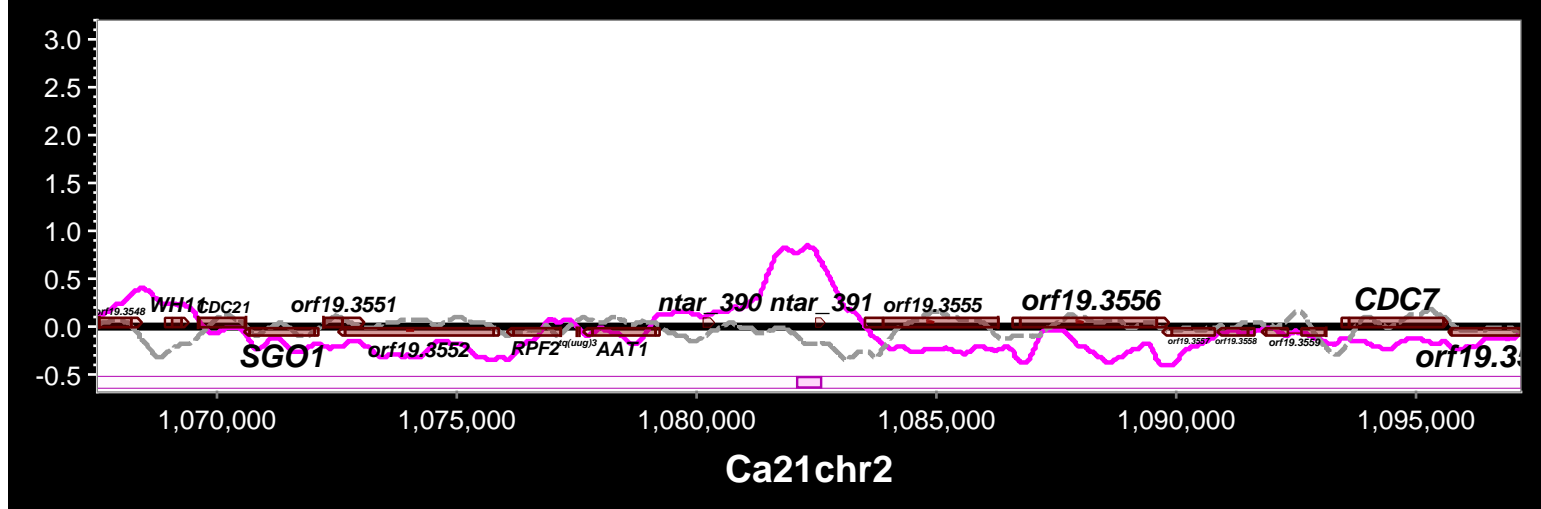

[0.83] Ca21chrR:762561-792244 [+] [CIT1, orf19.4394, DEM1, orf19.4395, orf19.4391]

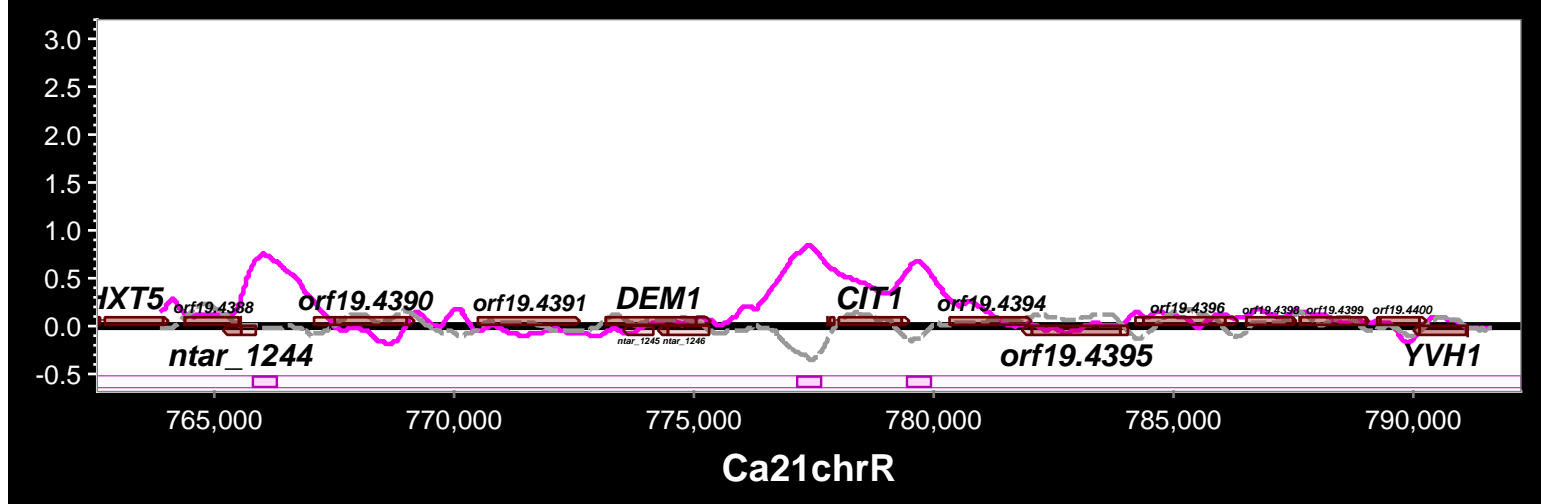

[0.829] Ca21chr5:640679-670362 [+] [orf19.4321, DAP2, MIG1, GRE3, orf19.4323]

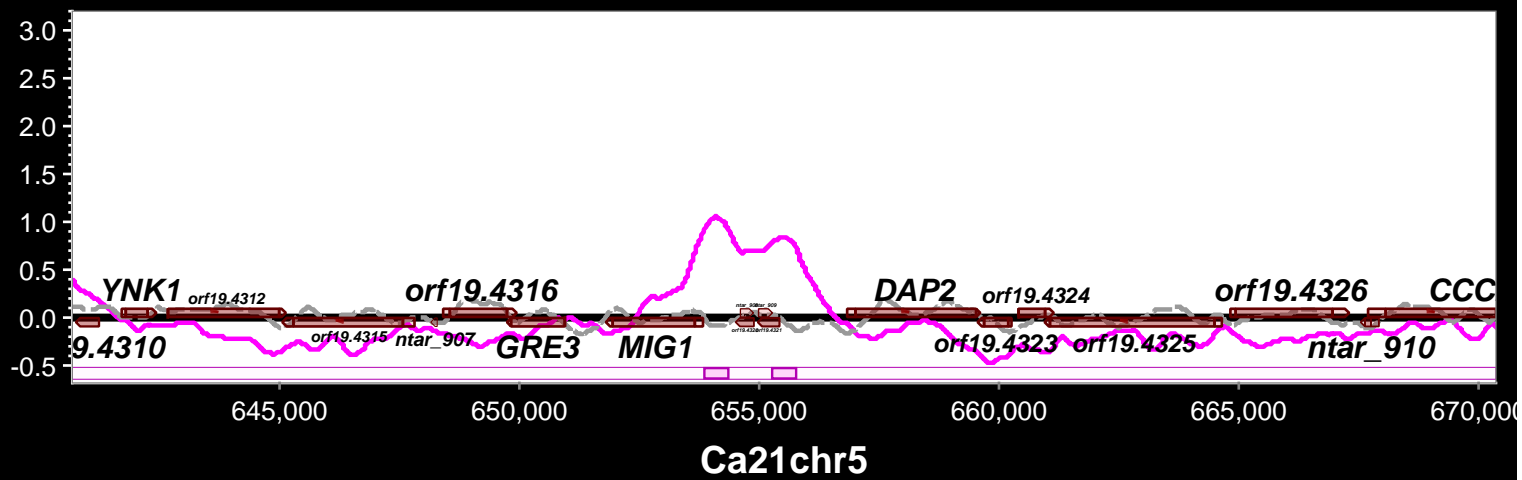

[0.828] Ca21chr1:2607994-2637677 [+] [orf19.5267, orf19.5268, orf19.5269, orf19.5266, orf19.5269.1]

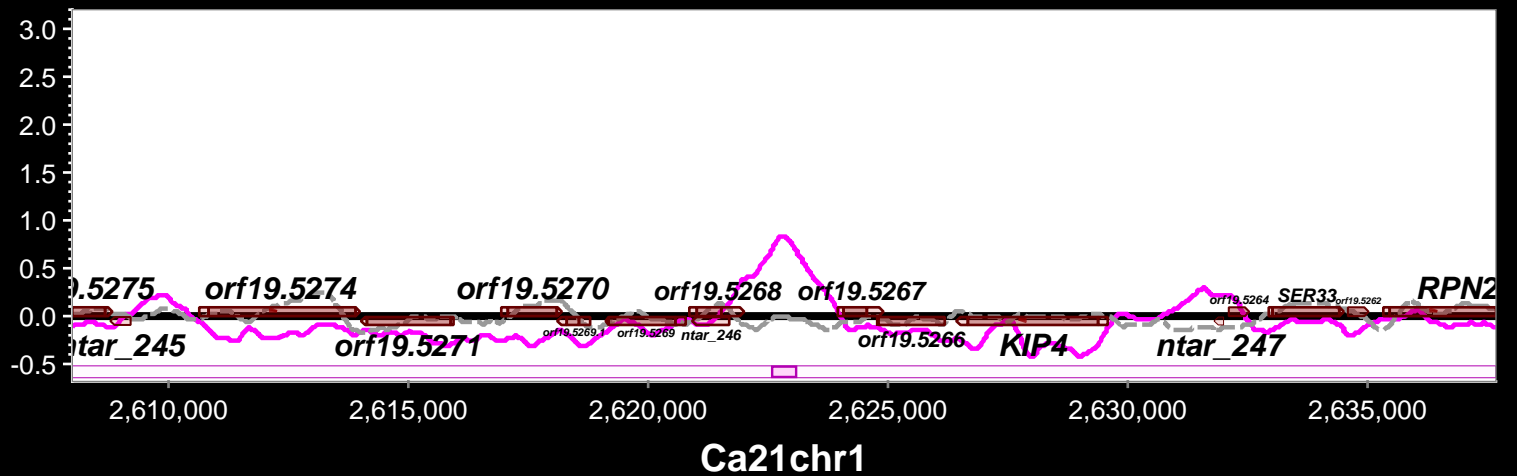

[0.828] Ca21chrR:1941169-1970852 [+] [SSU1, CDG1, ERG13, orf19.7316, orf19.7311]

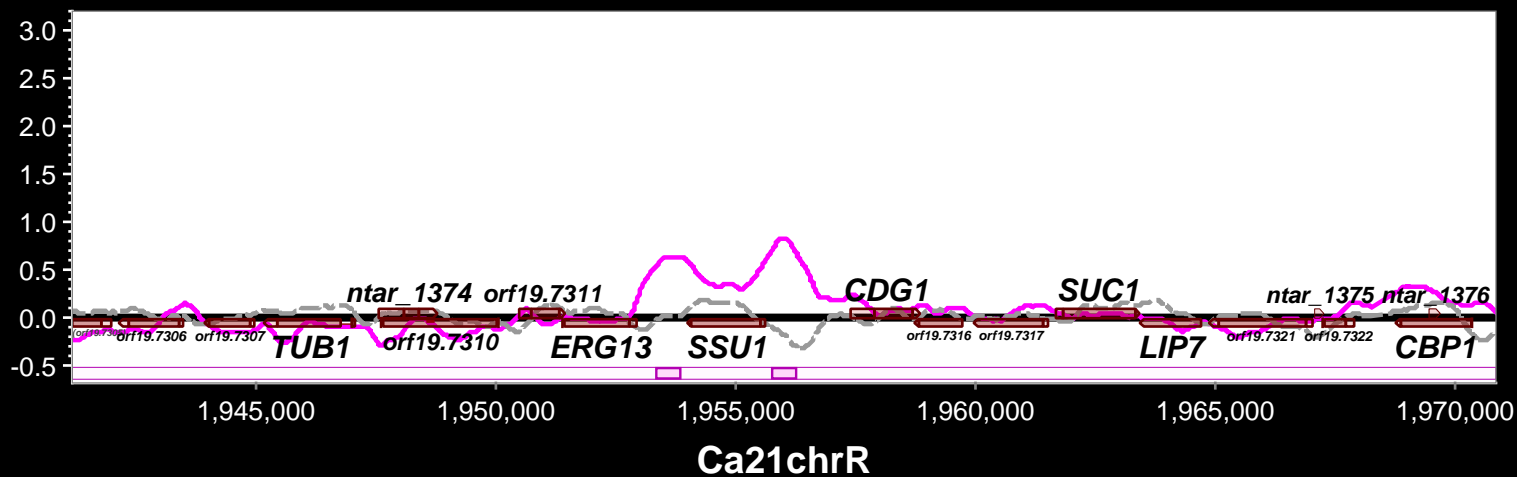

[0.827] Ca21chr2:305618-335301 [+] [orf19.1488, tL(CAA)1, orf19.1486, MSB2, orf19.1485]

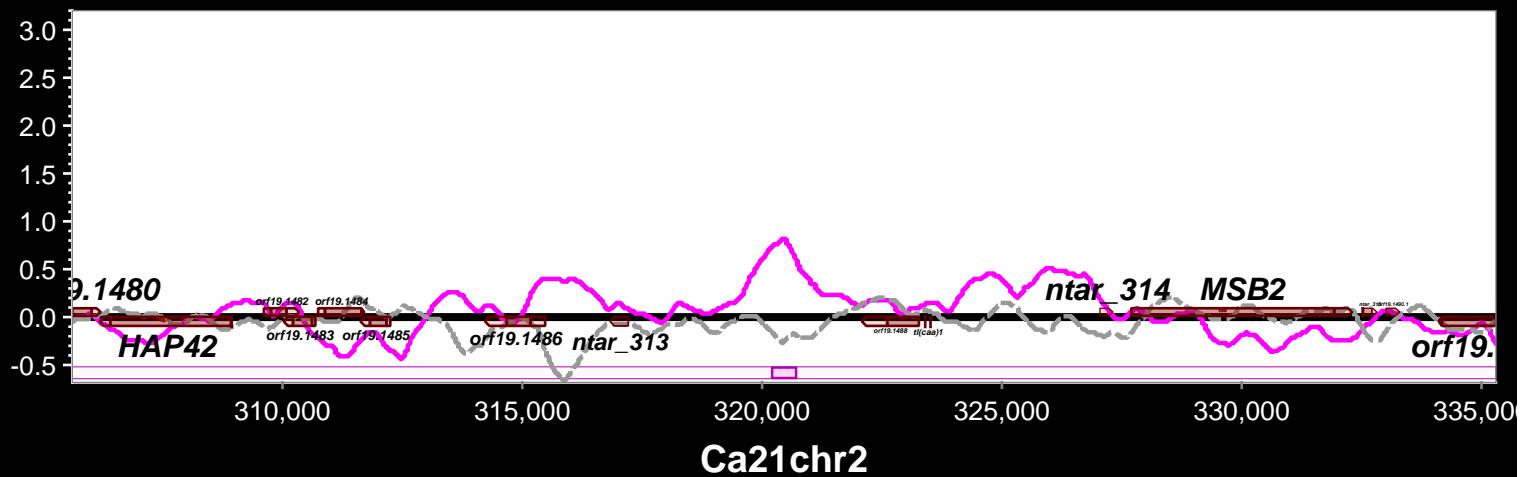

[0.827] Ca21chr2:774052-803735 [+] [tR(UCU)2, tF(GAA)2, YIM1, orf19.849, orf19.846]

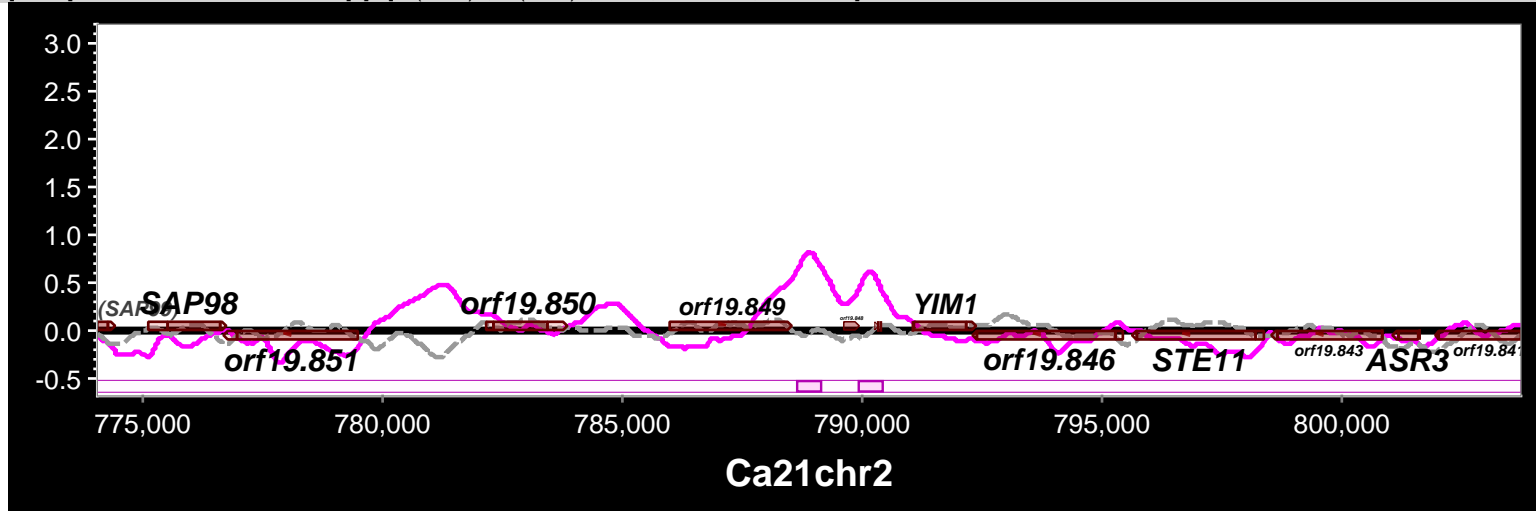

[0.826] Ca21chrR:99936-129619 [+] [orf19.7488, orf19.7487, orf19.7489, MRPL6, orf19.7485]

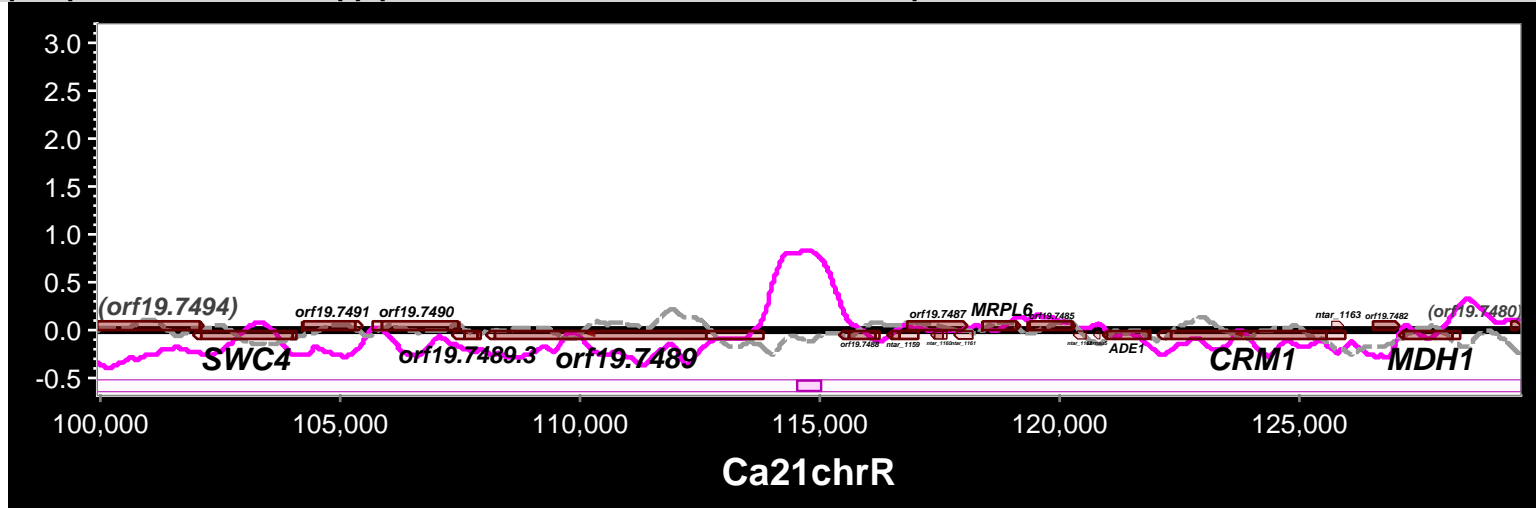

[0.825] Ca21chr5:759087-788770 [+] [orf19.2638, tE(UUC)5, orf19.2637, orf19.2639, orf19.2639.1]

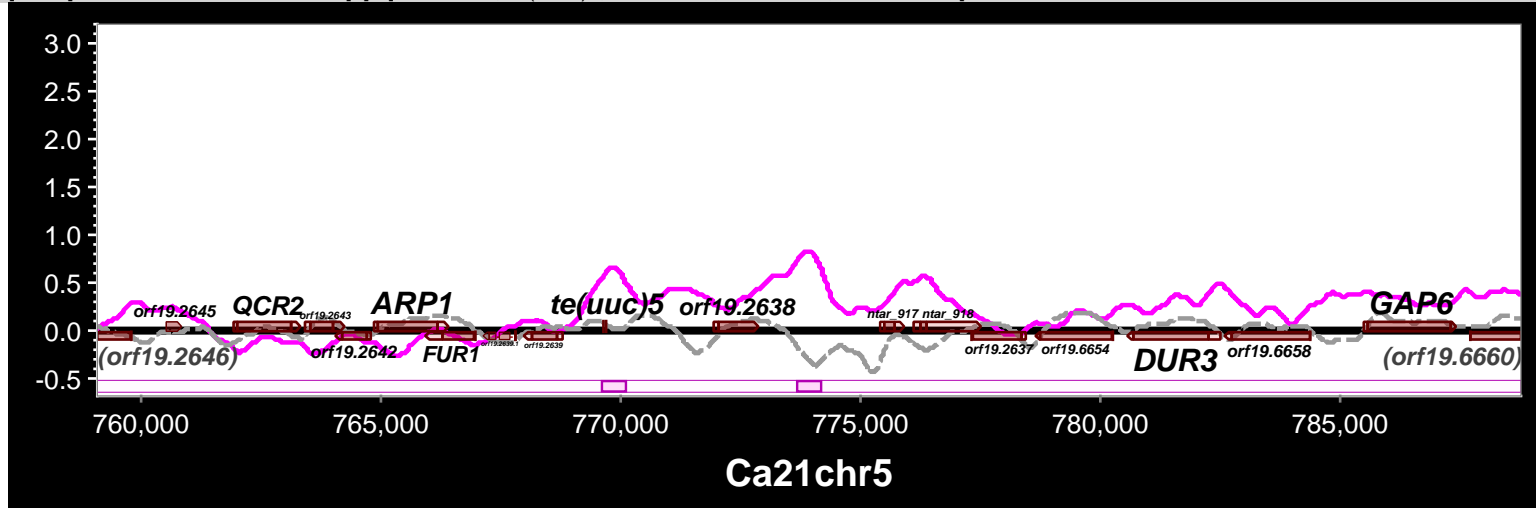

[0.822] Ca21chr4:861090-890773 [+] [PGA31, orf19.5300, ECM1, PGA30, orf19.5304]

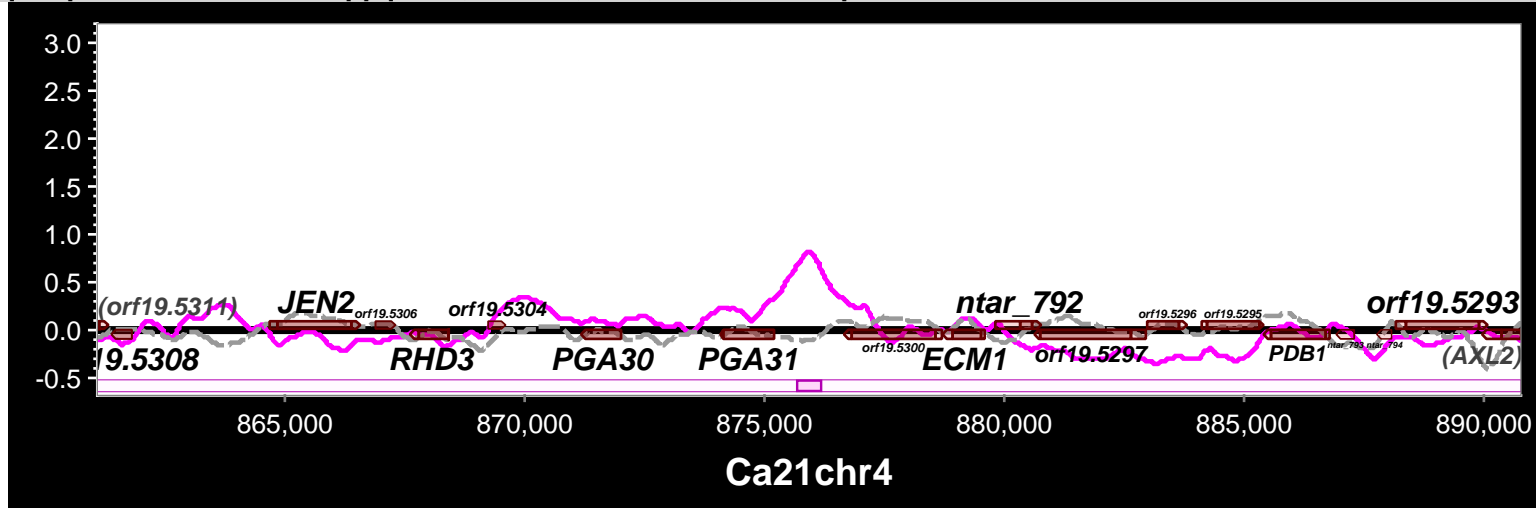

[0.817] Ca21chr1:499848-529531 [+] [orf19.2930, GSC1, orf19.2933, orf19.2934, RPL10]

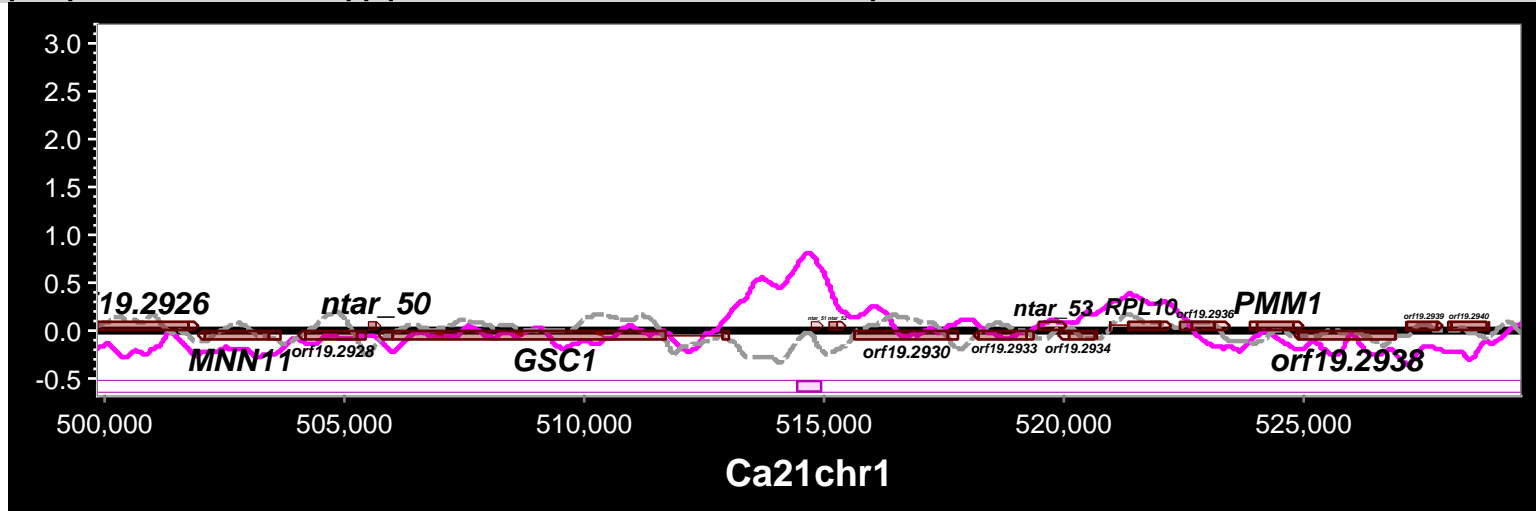

[0.817] Ca21chr1:1317371-1347054 [+] [orf19.177, orf19.1821, orf19.6280, orf19.6277]

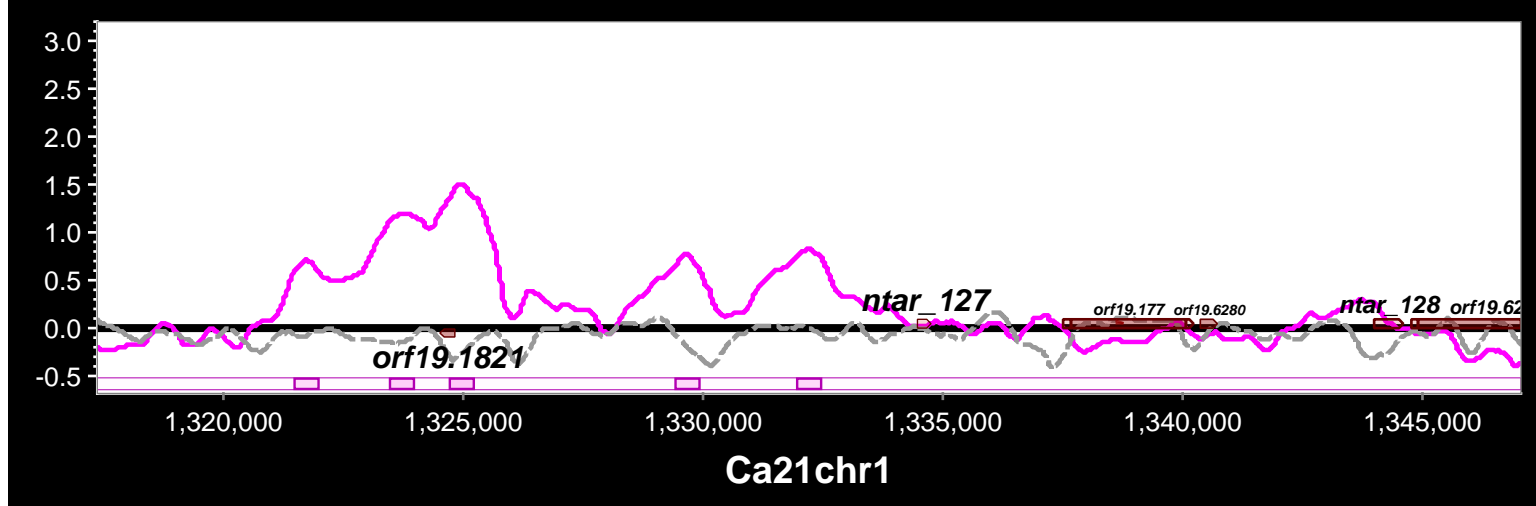

[0.816] Ca21chr1:1220456-1250139 [+] [orf19.2457, orf19.2458, orf19.2455, orf19.2459, PHO87]

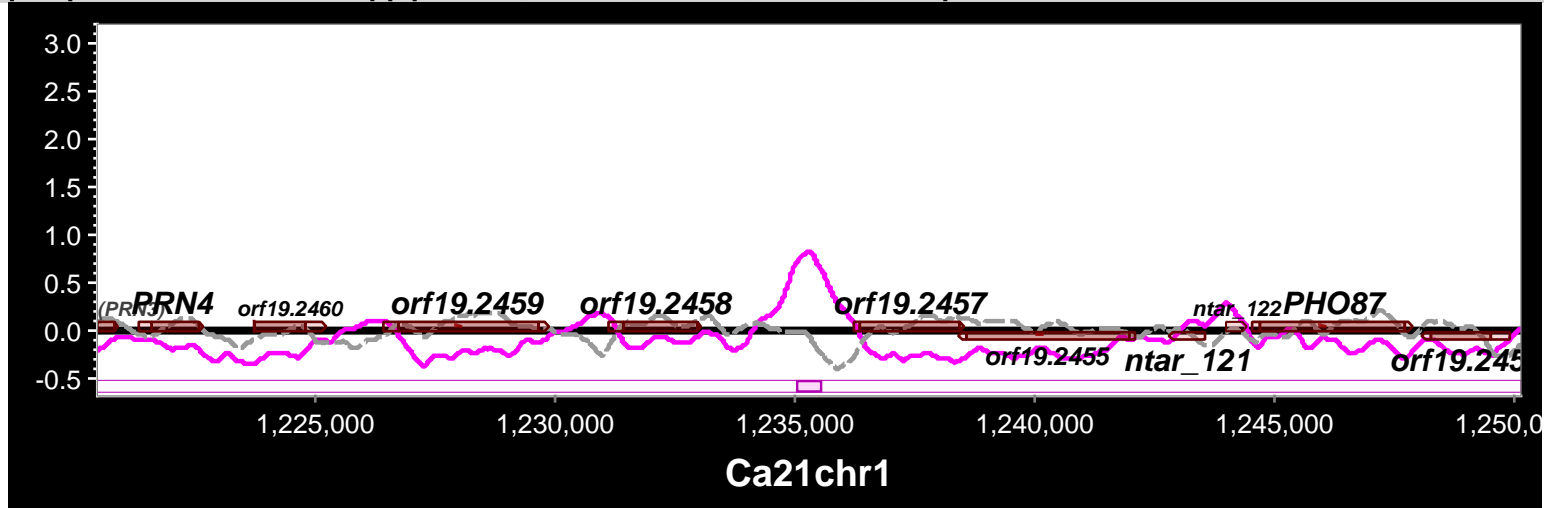

[0.815] Ca21chrR:2096540-2126223 [+] [BET2, DPB2, DEF1, GNP3, YTA6]

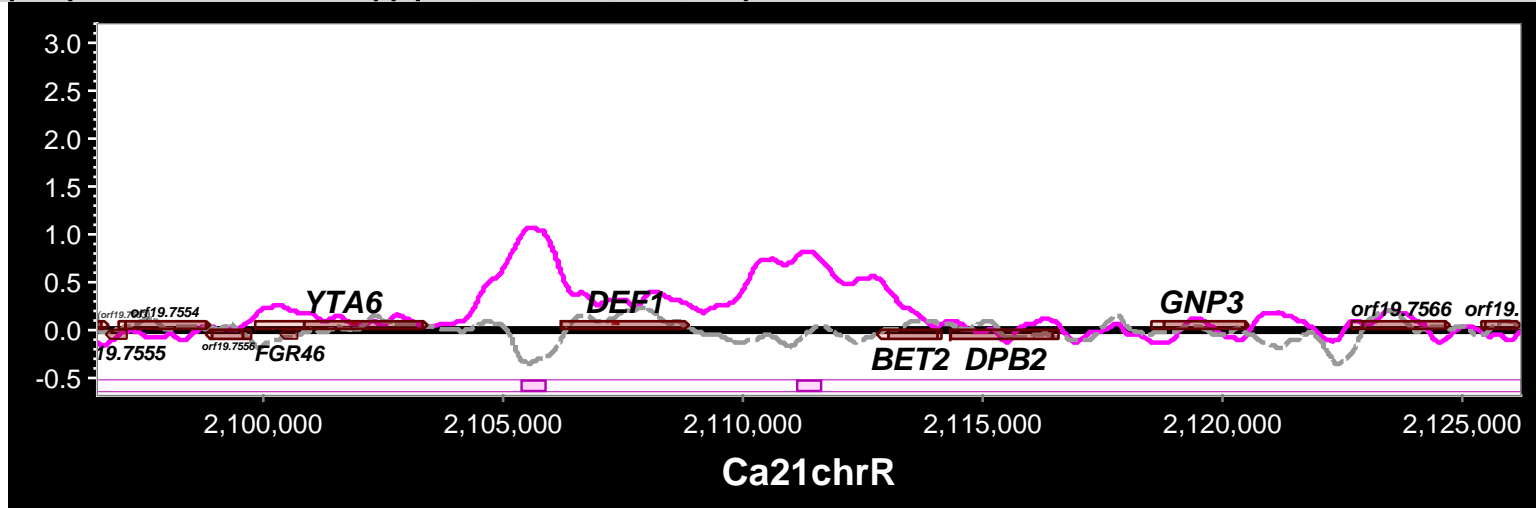

[0.811] Ca21chr6:781626-811309 [+] [ALS9, ALS1, ALA1, orf19.5747, orf19.5748]

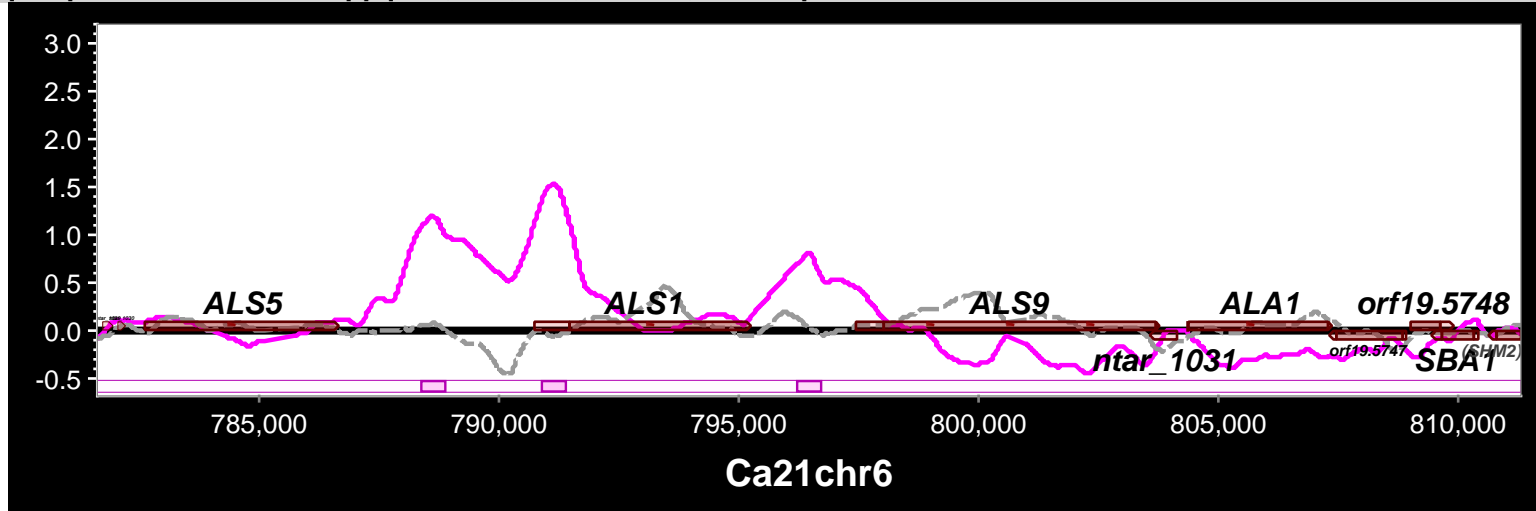

[0.808] Ca21chr4:224609-254292 [+] [orf19.4672, CAS5, BMT9, CRD2, AAT22]

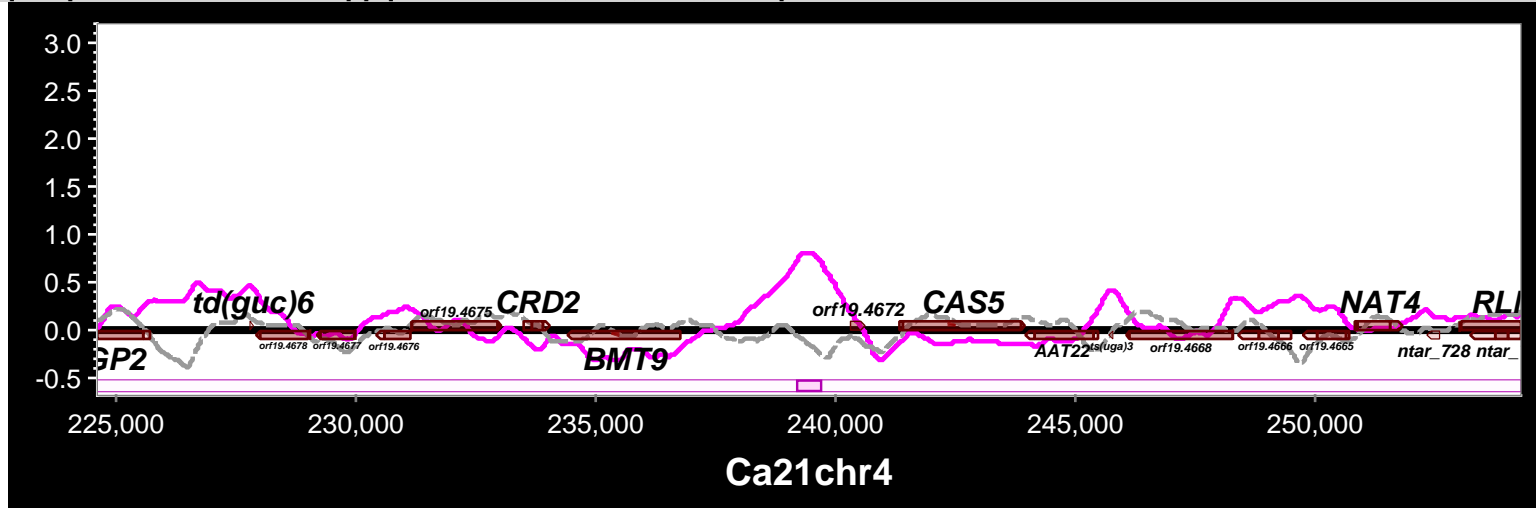

[0.807] Ca21chrR:616909-646592 [+] [PGA34, RPD3, INN1, orf19.2835, orf19.2836]

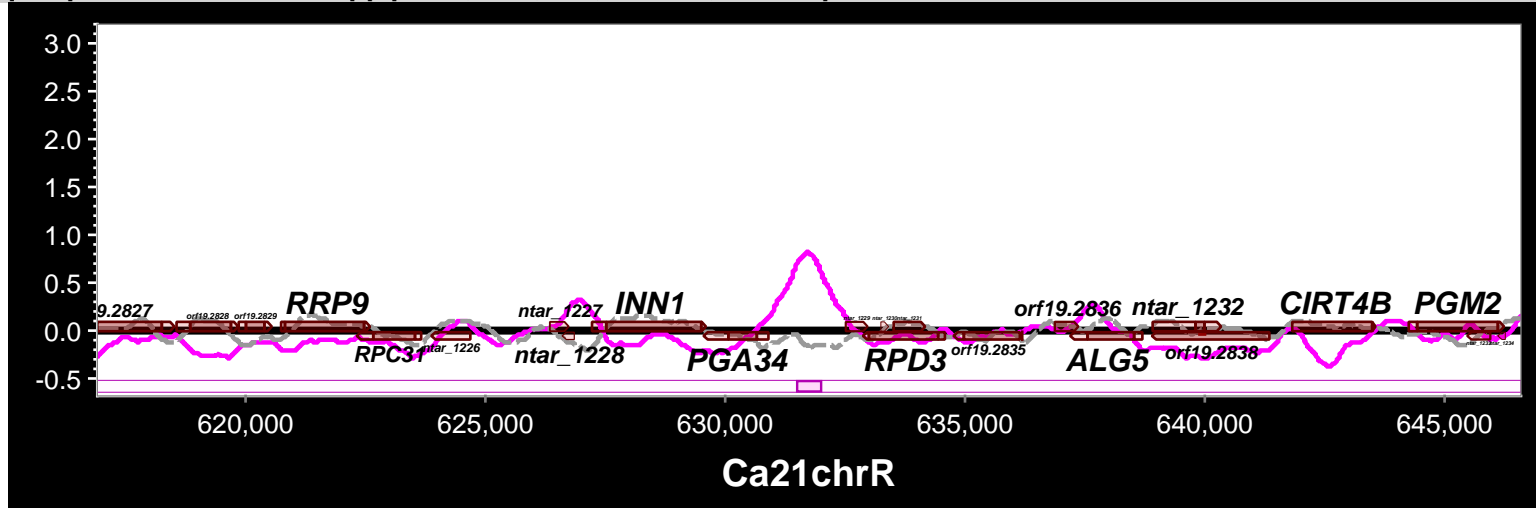

[0.806] Ca21chr4:1511947-1541630 [+] [CCT6, orf19.3125, orf19.3124, orf19.3123.2, RPT5]

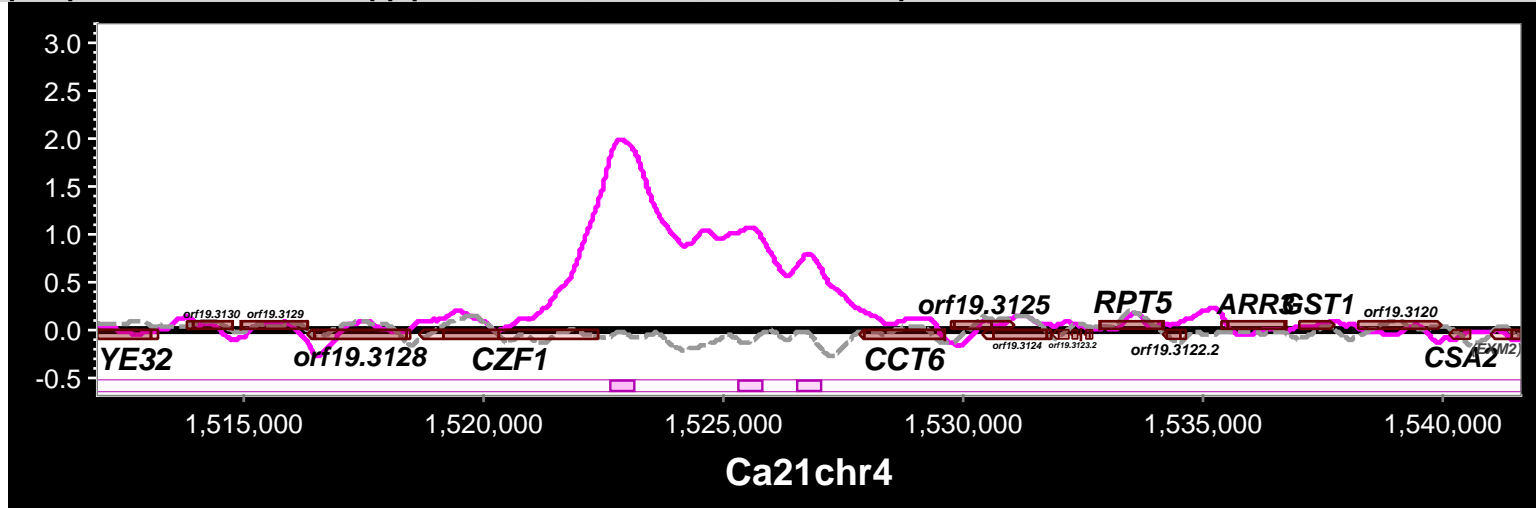

[0.804] Ca21chr1:1851197-1880880 [+] [EAF6, ENO1, orf19.397, orf19.398, orf19.394]

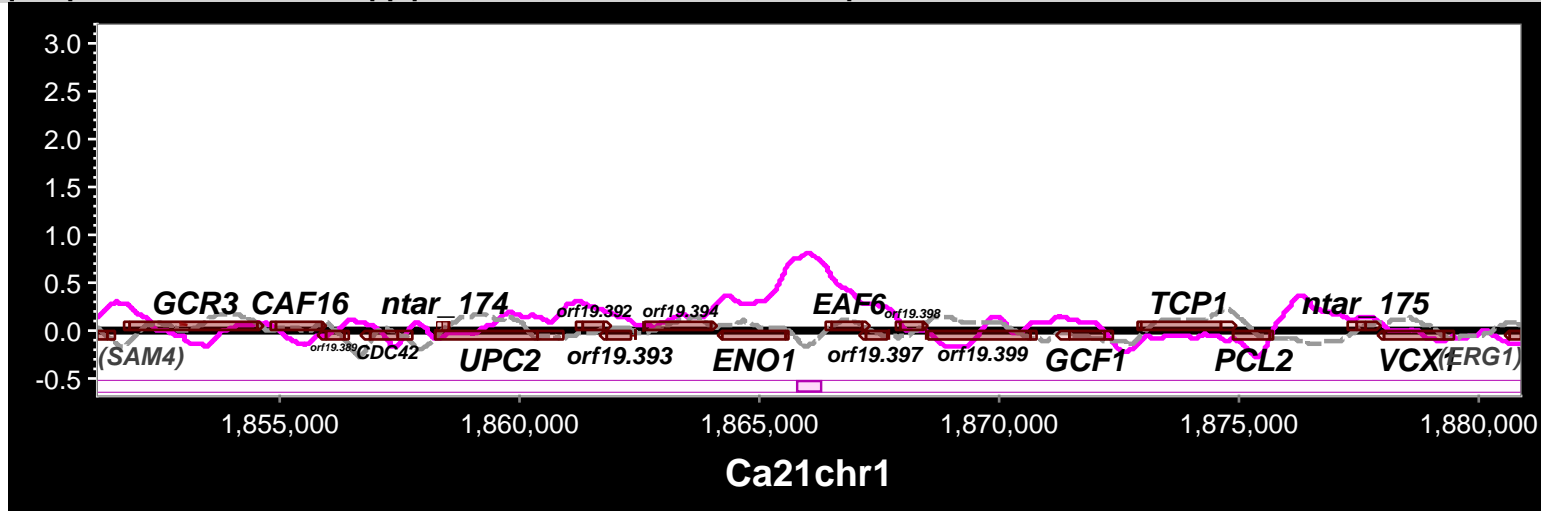

[0.804] Ca21chr7:350979-380662 [+] [orf19.6556, orf19.6555, orf19.6554, orf19.6553, orf19.6557]

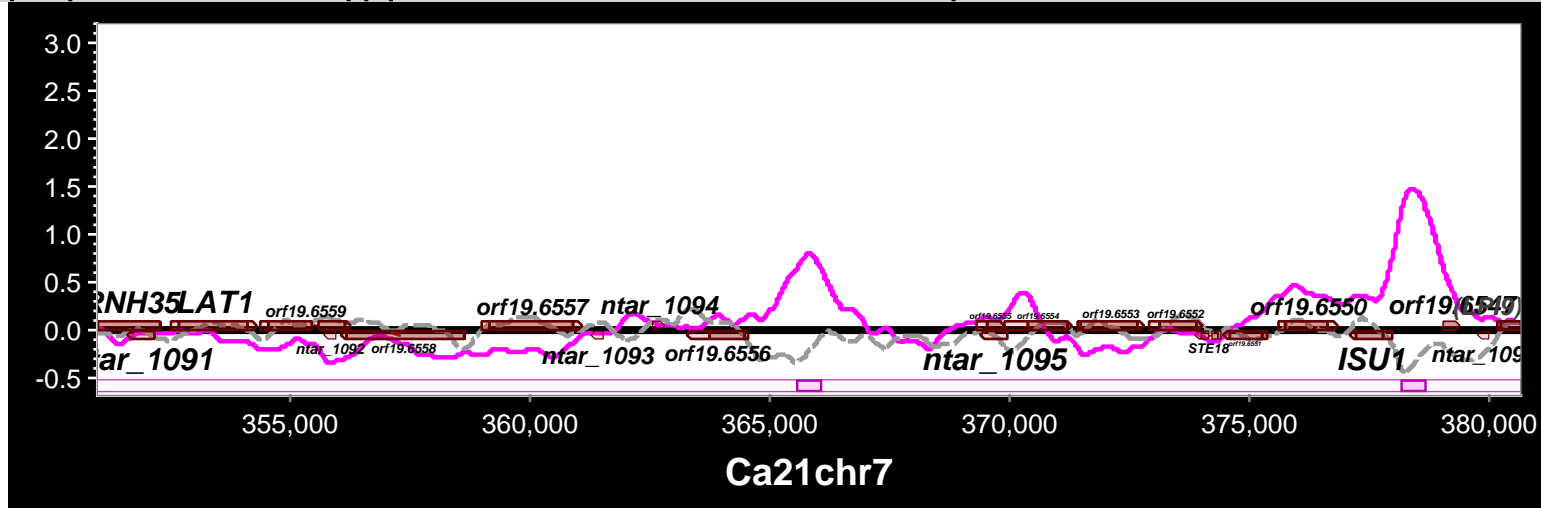

[0.797] Ca21chr7:282715-312398 [+] [orf19.6586, orf19.6585, orf19.6587, orf19.6588, PRT1]

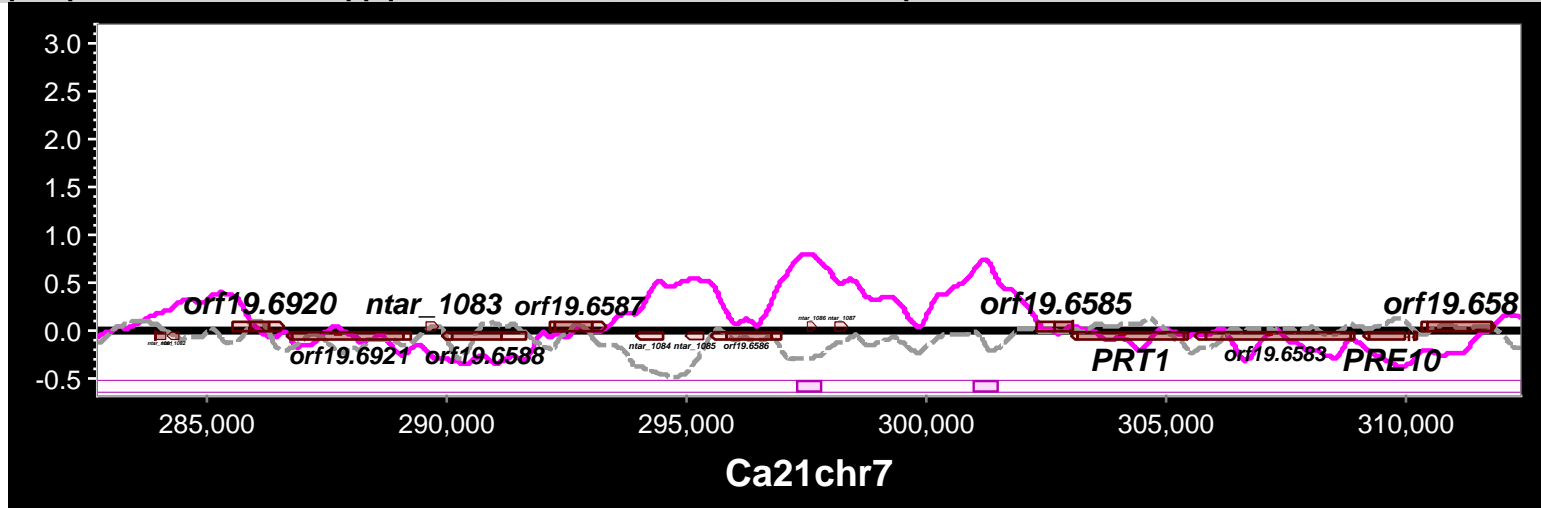

[0.795] Ca21chr3:249242-278925 [+] [PMC1, tR(CCU)1, orf19.1728, orf19.1729, orf19.1730]

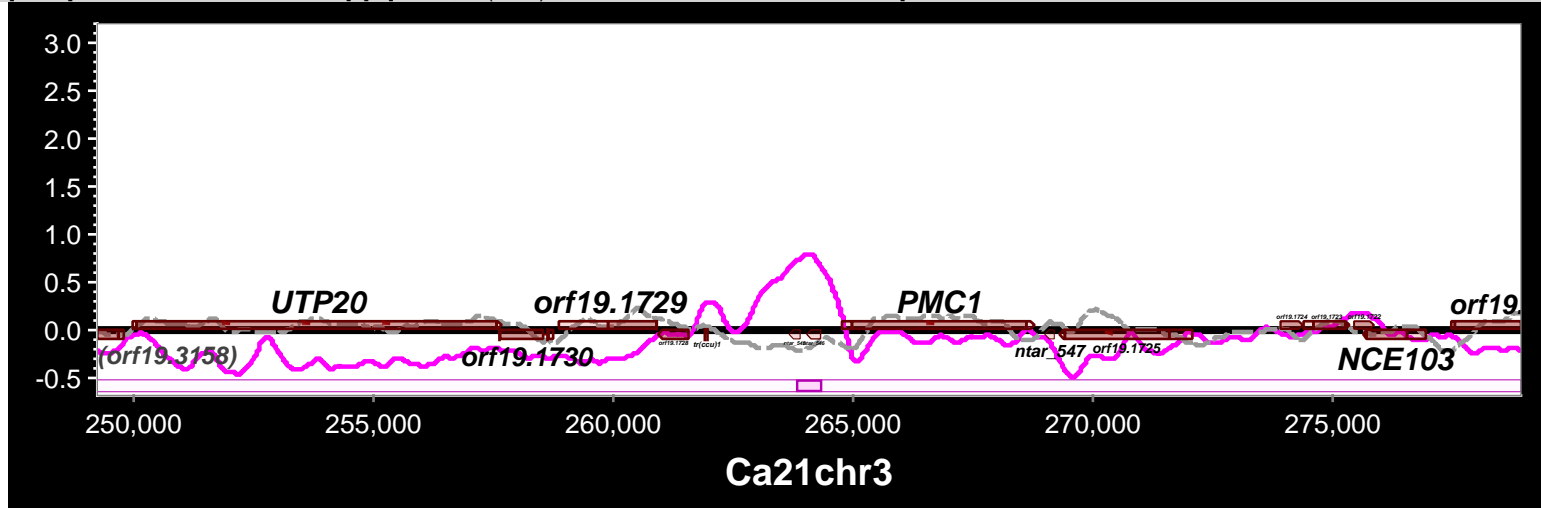



[0.792] Ca21chr2:1349421-1379104 [+] [FRP3, orf19.1225, DBF2, AMO2, orf19.81]

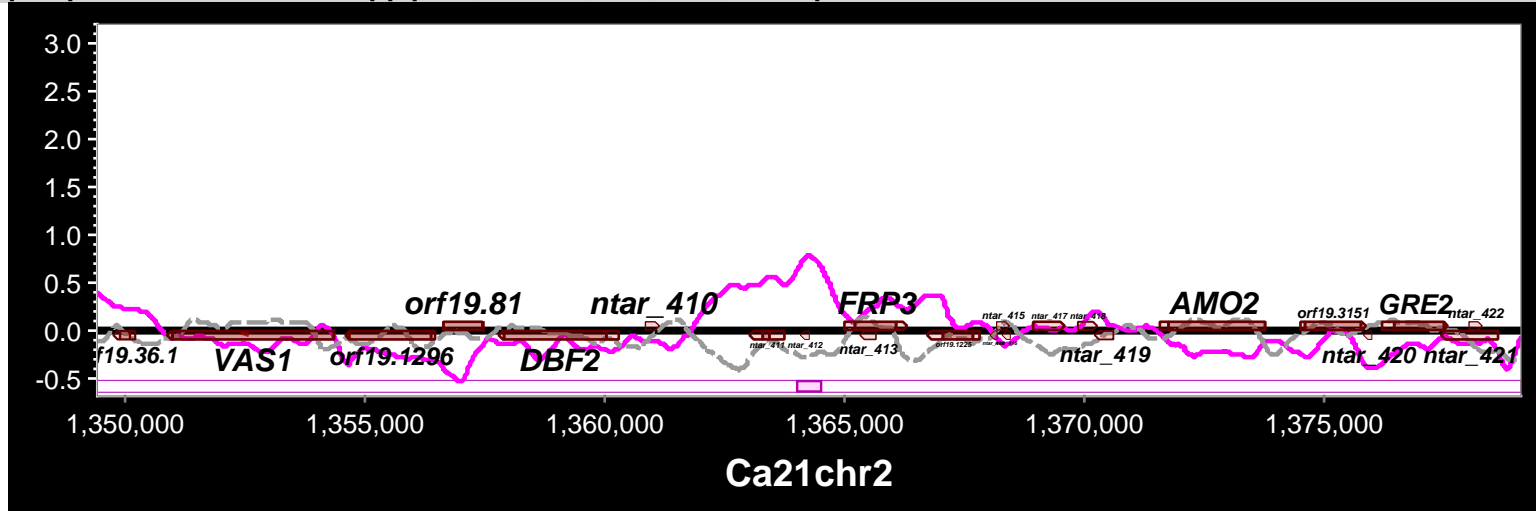

[0.787] Ca21chr3:1628265-1657948 [+] [orf19.6783, BMT1, PGA32, RPS12, orf19.6786]

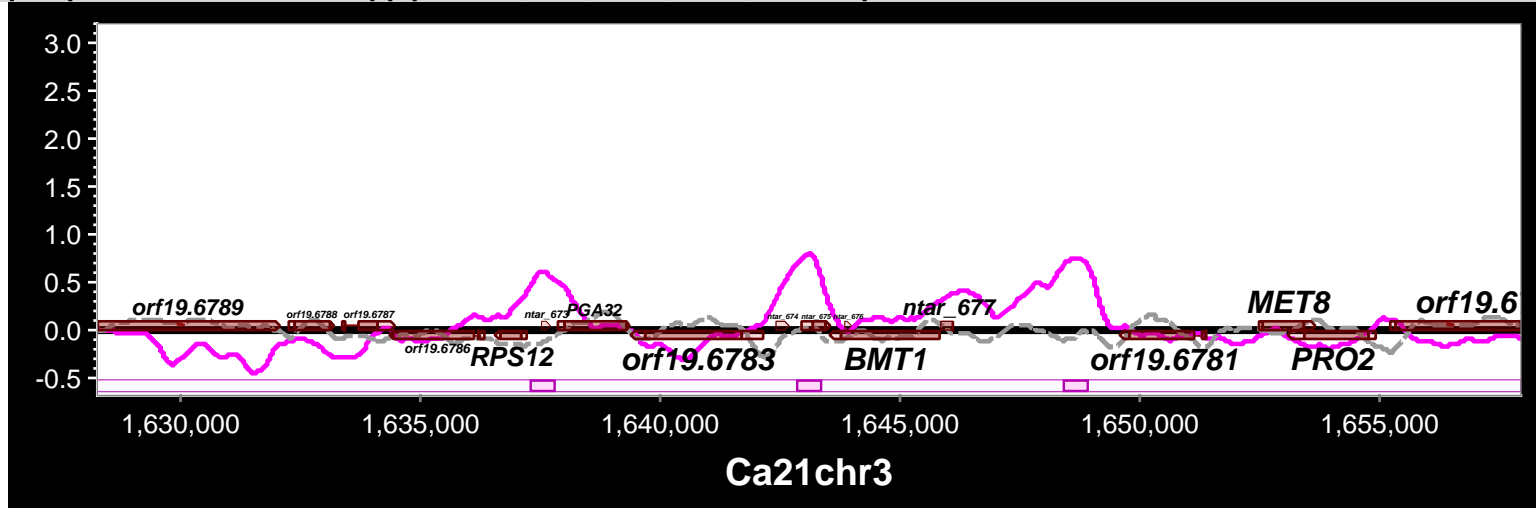

[0.785] Ca21chr6:27938-57621 [+] [orf19.1189, orf19.1190, orf19.1191, CPH2, DNA2]

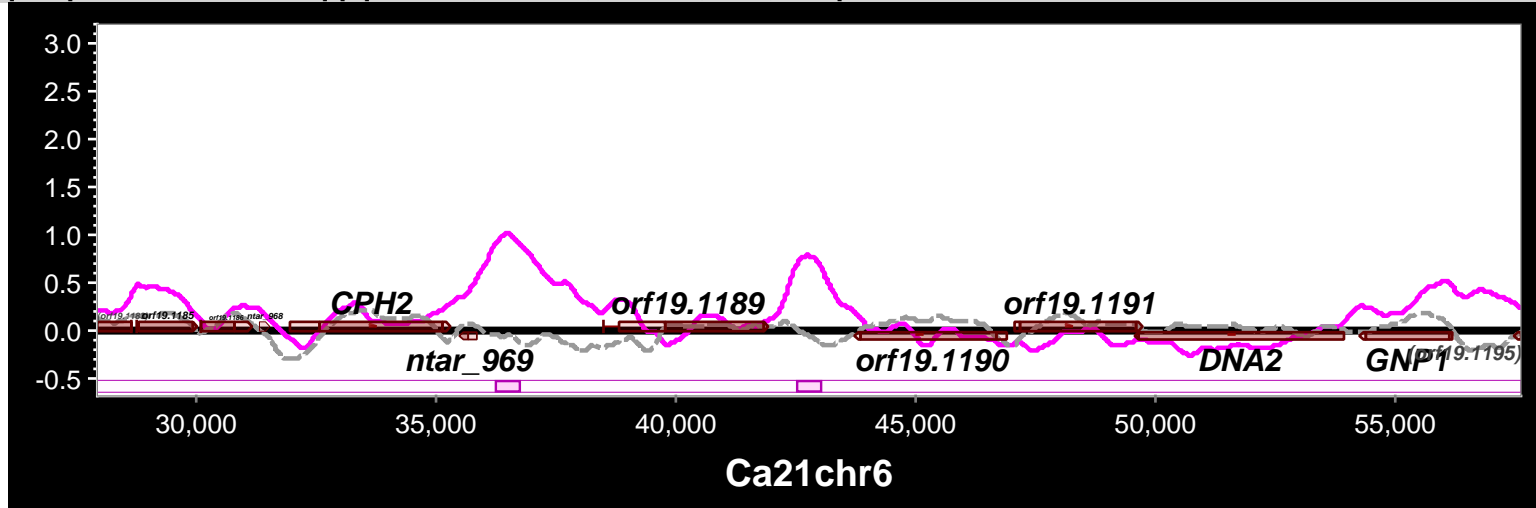

[0.779] Ca21chr1:2154456-2184139 [+] [VPS41, orf19.4857, LIP3, orf19.4861, orf19.4861.1]

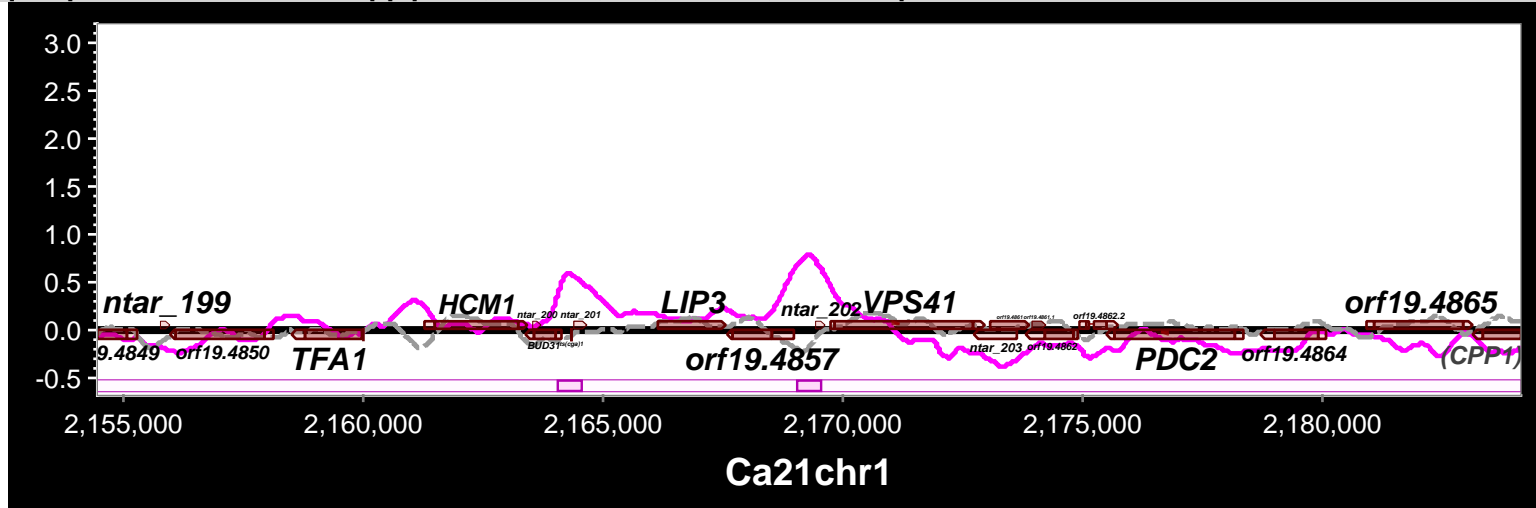

[0.777] Ca21chr1:436675-466358 [+] [orf19.3671, GAL10, GAL1, orf19.3673, GAL102]

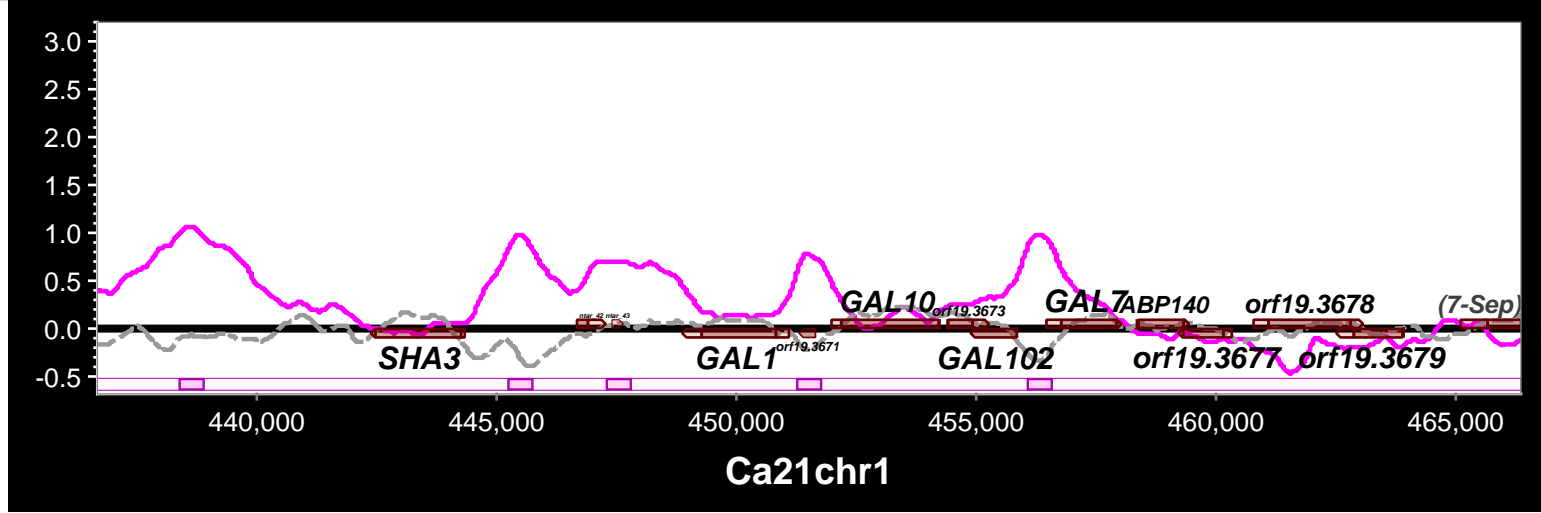

[0.777] Ca21chr1:1314835-1344518 [+] [orf19.1821, orf19.177, orf19.6280, UME6]

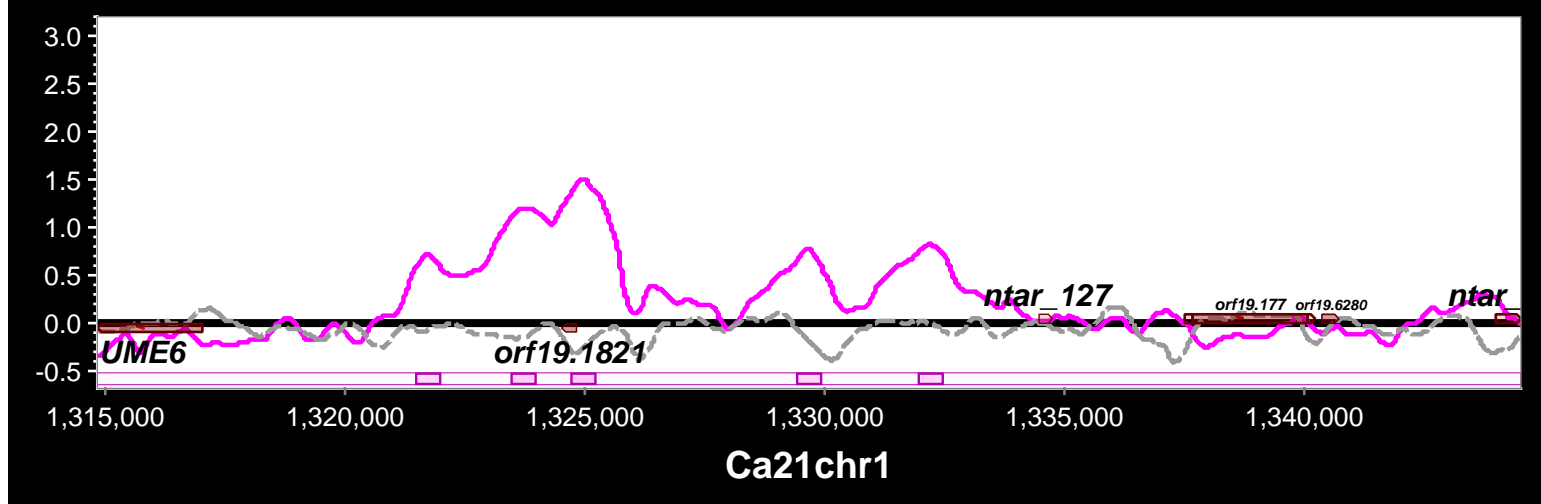

[0.776] Ca21chr2:152089-181772 [+] [HGT8, HGT7, HGT6, orf19.2024, orf19.2019]

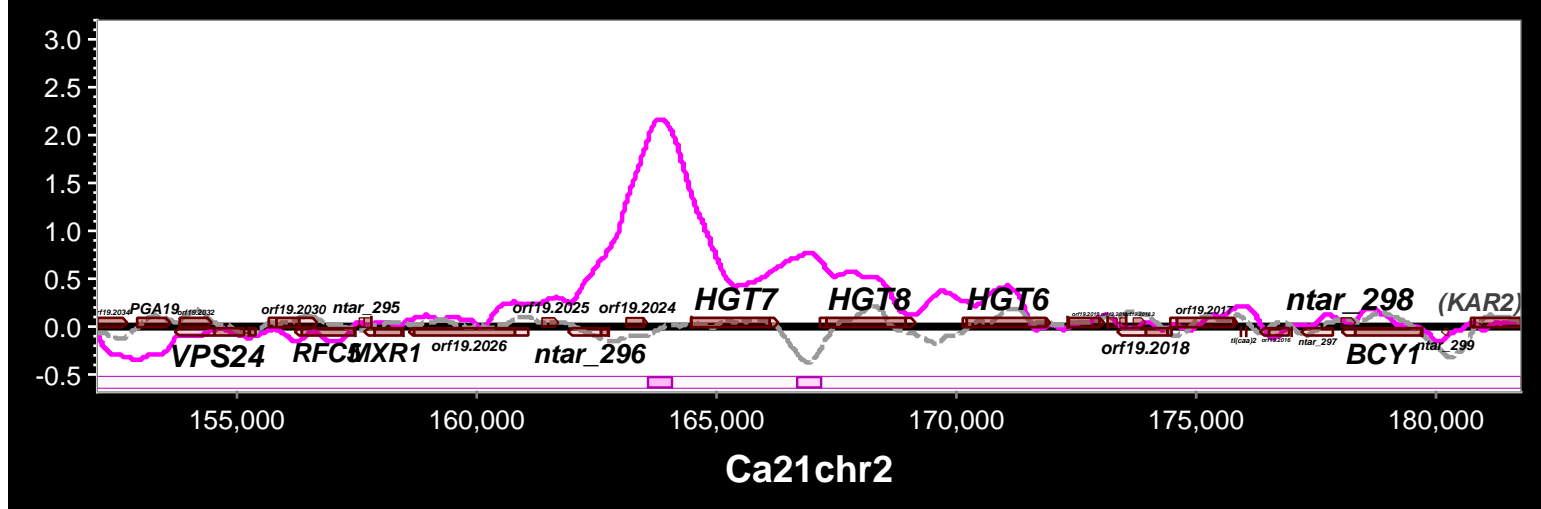

[0.776] Ca21chrR:1999931-2029614 [+] [orf19.7341.1, AXL1, tD(GUC)7, orf19.7341, orf19.7343]

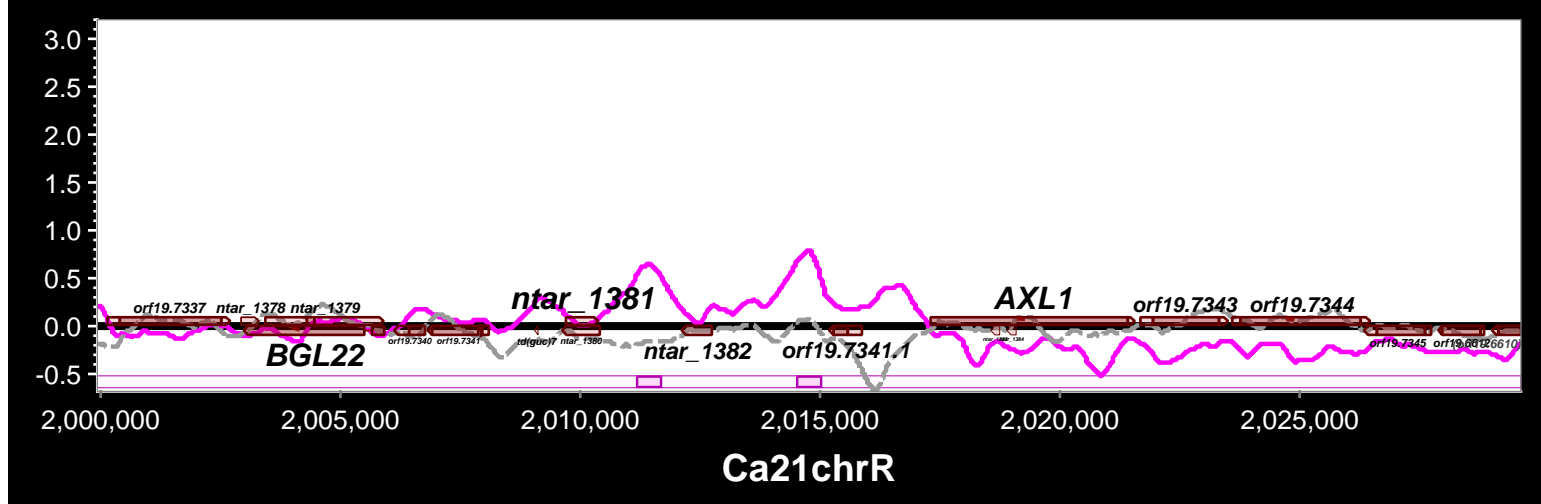

[0.775] Ca21chrR:1908697-1938380 [+] [orf19.7296, orf19.7295, orf19.7297, tm(CAU)4, MPS1]

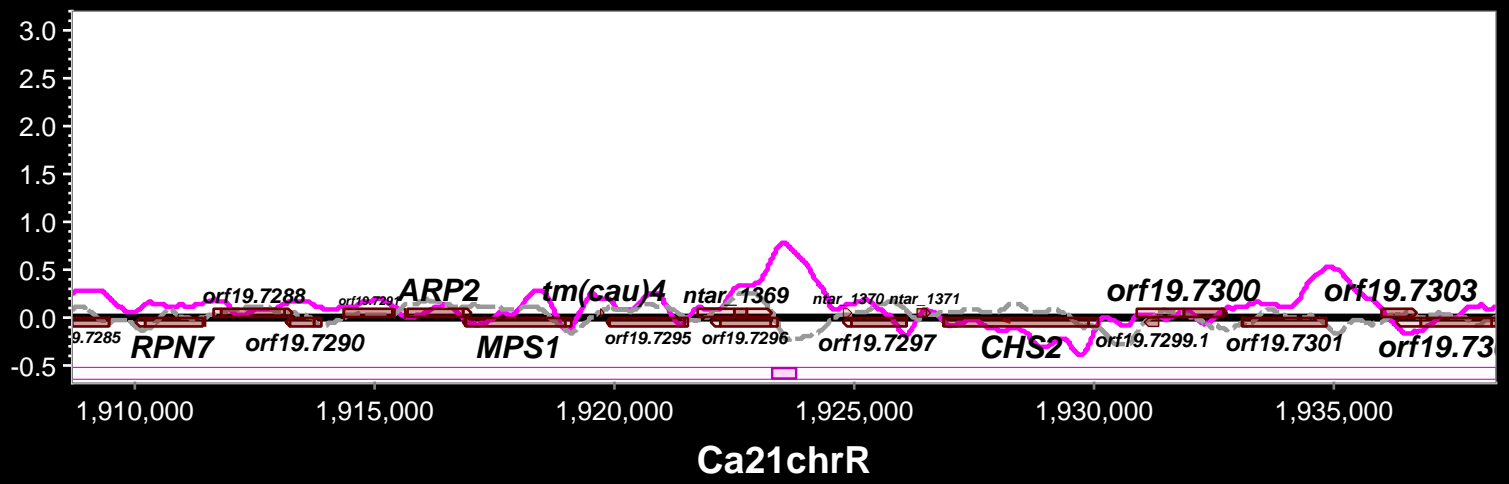

[0.774] Ca21chr2:200172-229855 [+] [CHA1, tL(UAA)1, orf19.1998, orf19.1999, orf19.2000]

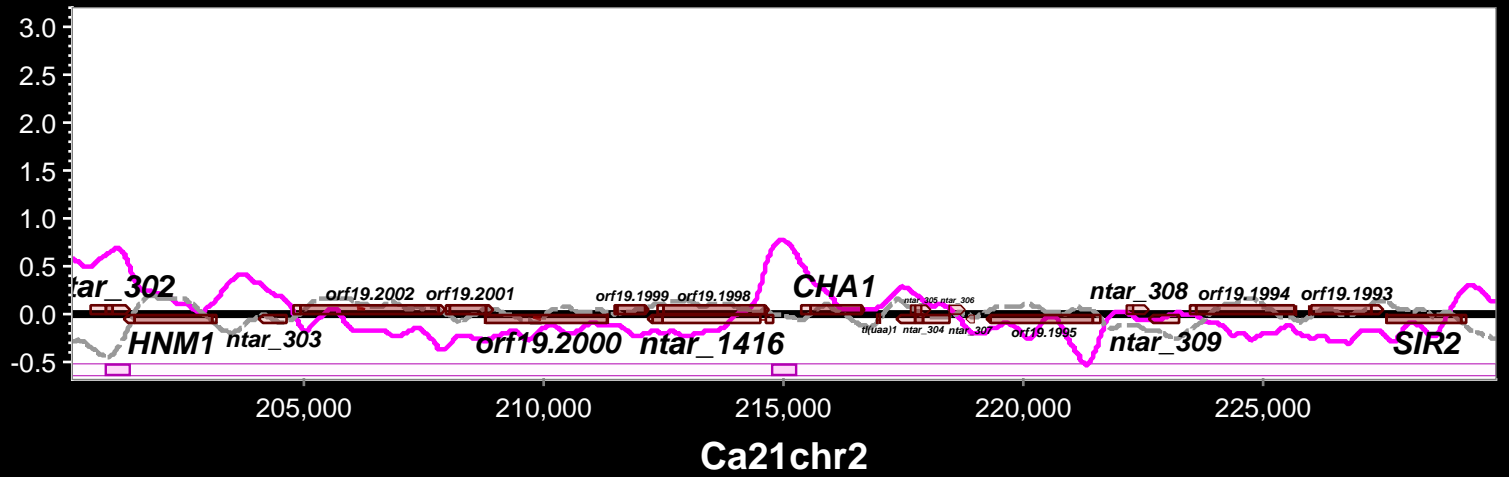

[0.774] Ca21chr3:324002-353685 [+] [TOS1, orf19.1691, orf19.1687, CAS4, orf19.1686]

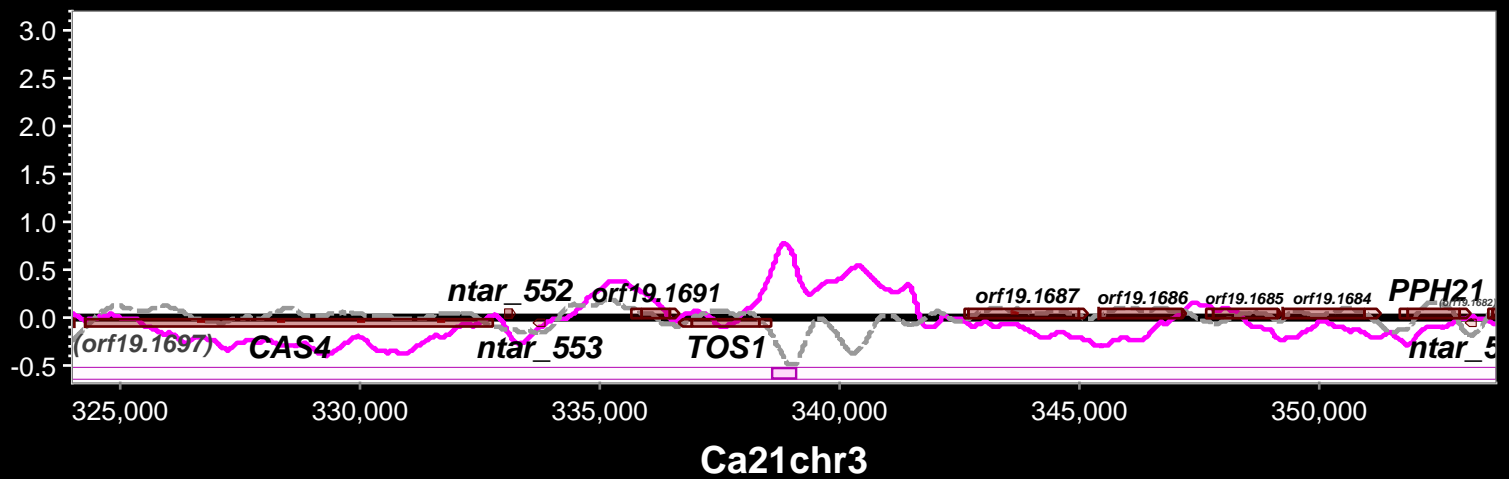

[0.773] Ca21chr5:103868-133551 [+] [orf19.934, orf19.933, orf19.932, AGA1, orf19.931]

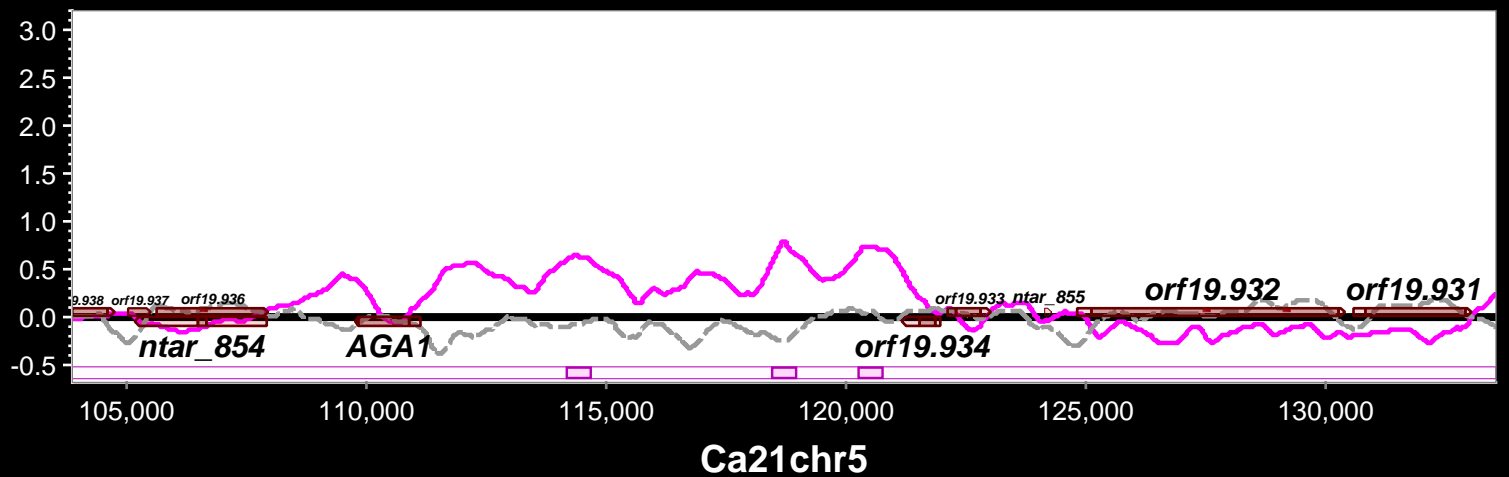

[0.77] Ca21chr2:2041866-2071549 [+] [orf19.1778, orf19.1777, MP65, orf19.1780, orf19.1782]

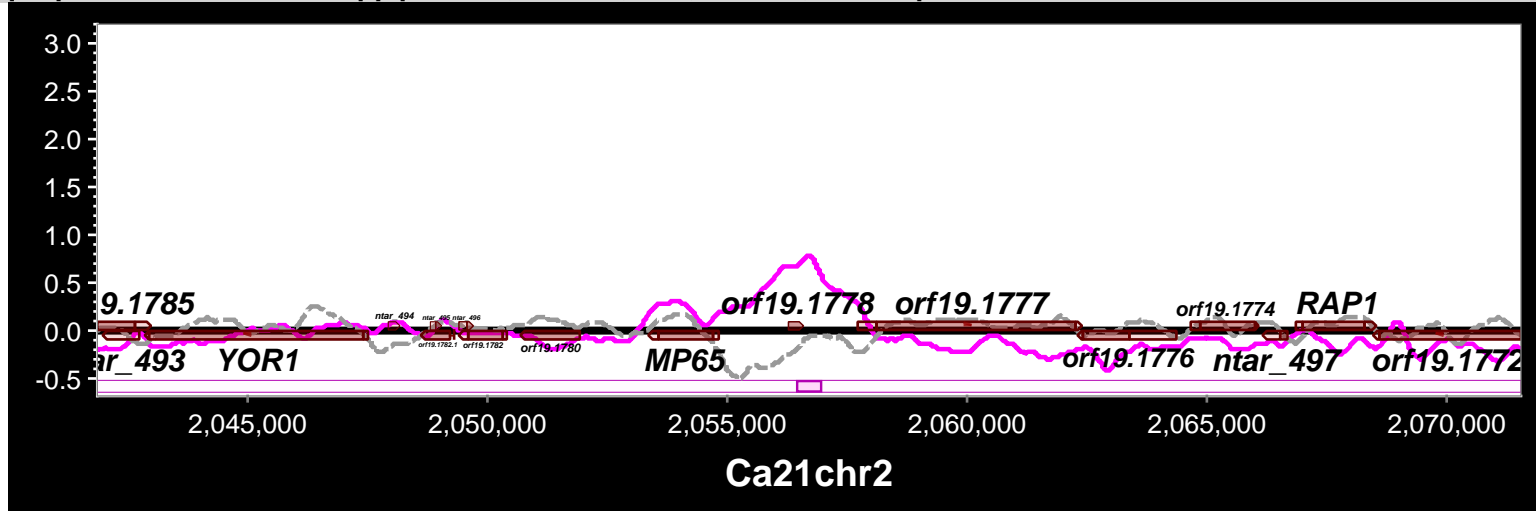

[0.77] Ca21chr5:492324-522007 [+] [orf19.4234, PDE1, THR4, RET2, PTH1]

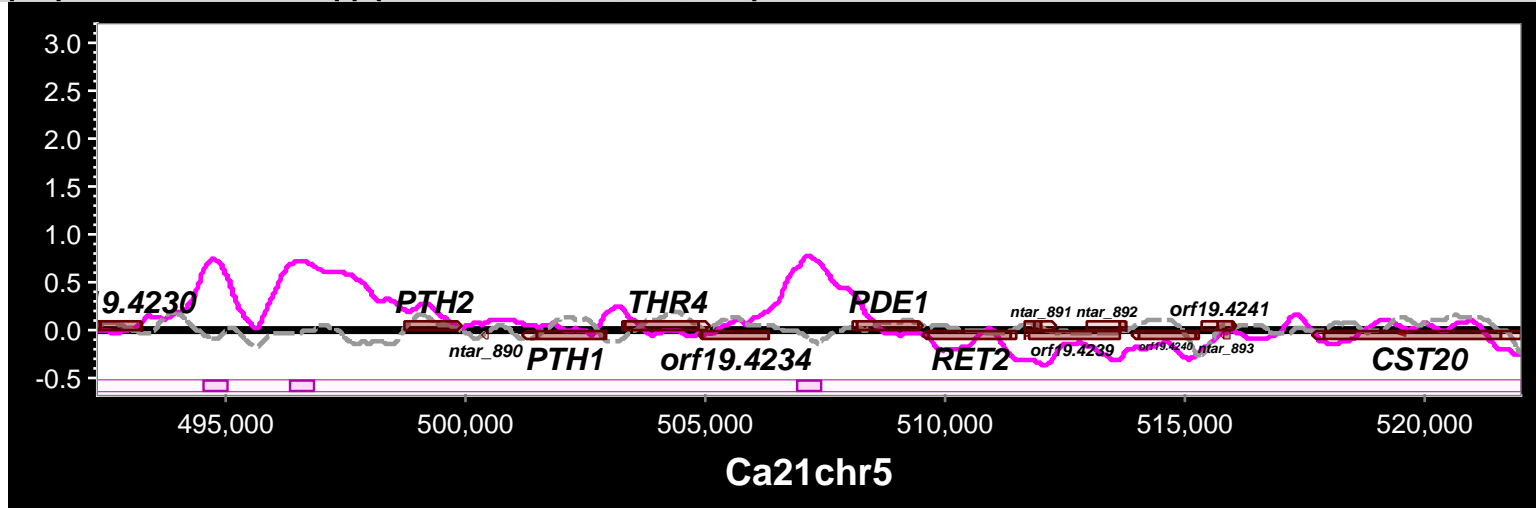

[0.77] Ca21chr7:477003-506686 [+] [orf19.6487, LDG3, orf19.6488, orf19.6484, FMP45]

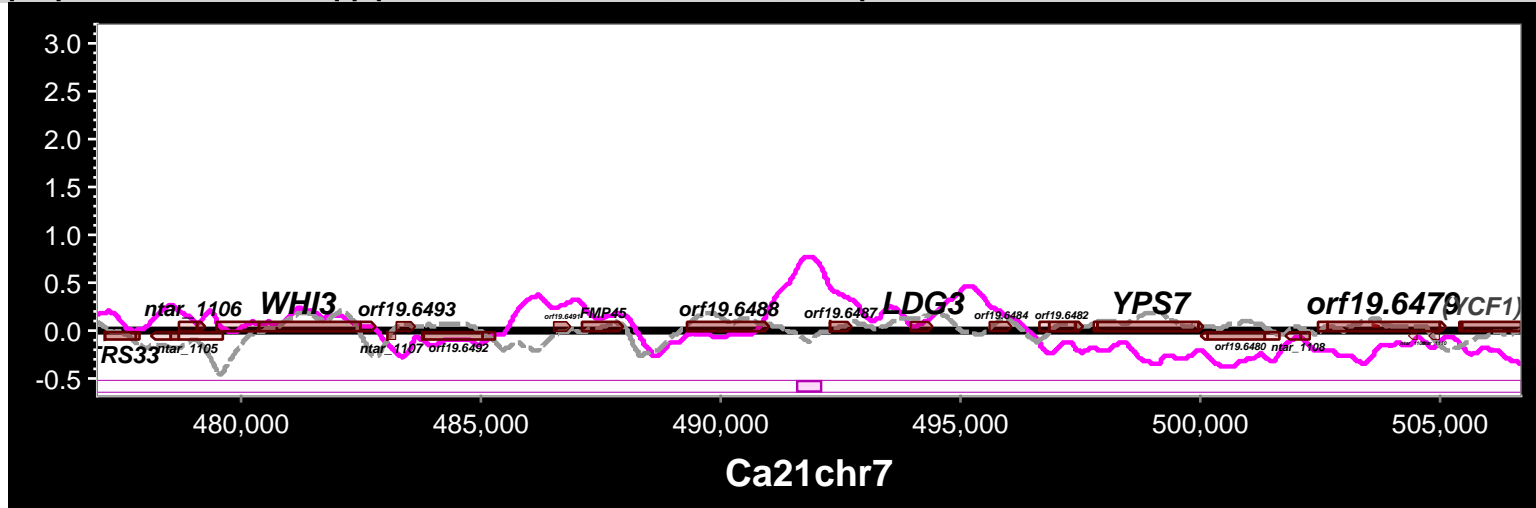

[0.767] Ca21chr1:2504456-2534139 [+] [DPP1, PHO84, SAM2, GIN1, orf19.1171]

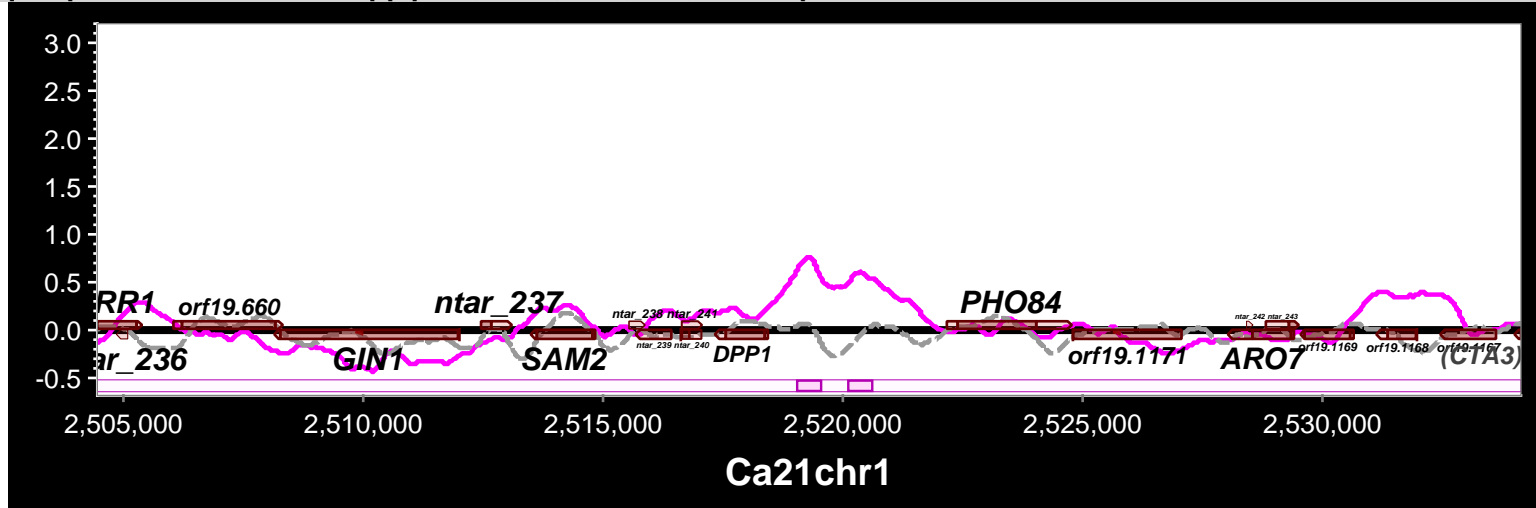

[0.759] Ca21chr1:2238989-2268672 [+] [CLA4, TPK1, orf19.4888, orf19.4888, orf19.4893]

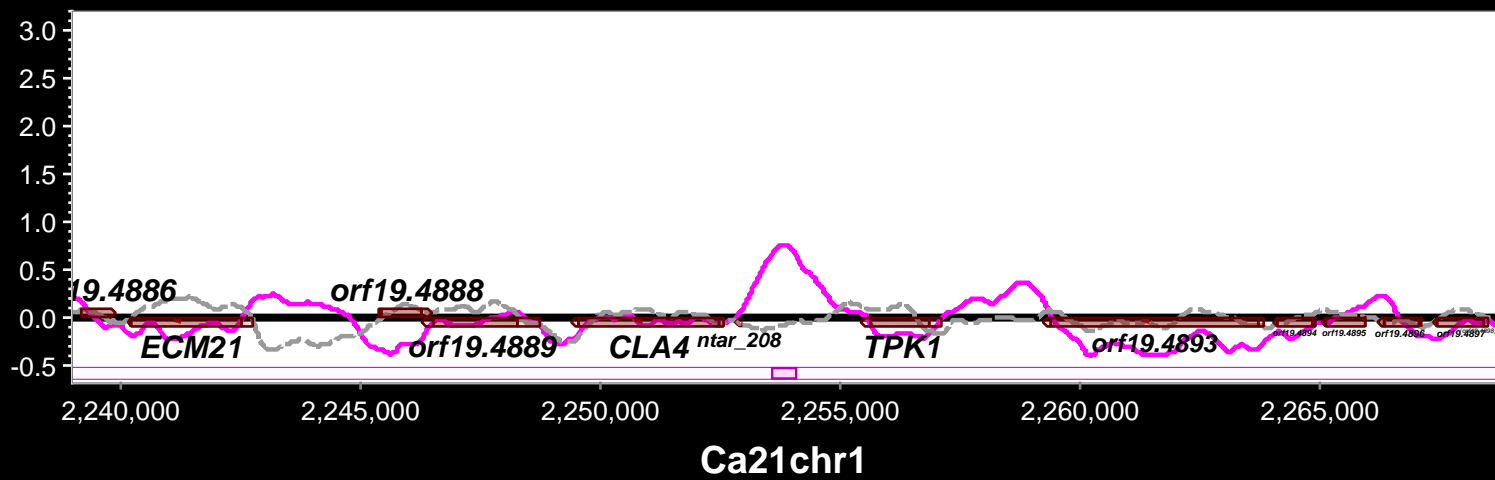

[0.759] Ca21chrR:60196-89879 [+] [CDA2, orf19.7502, orf19.7504, orf19.7506, orf19.7507]

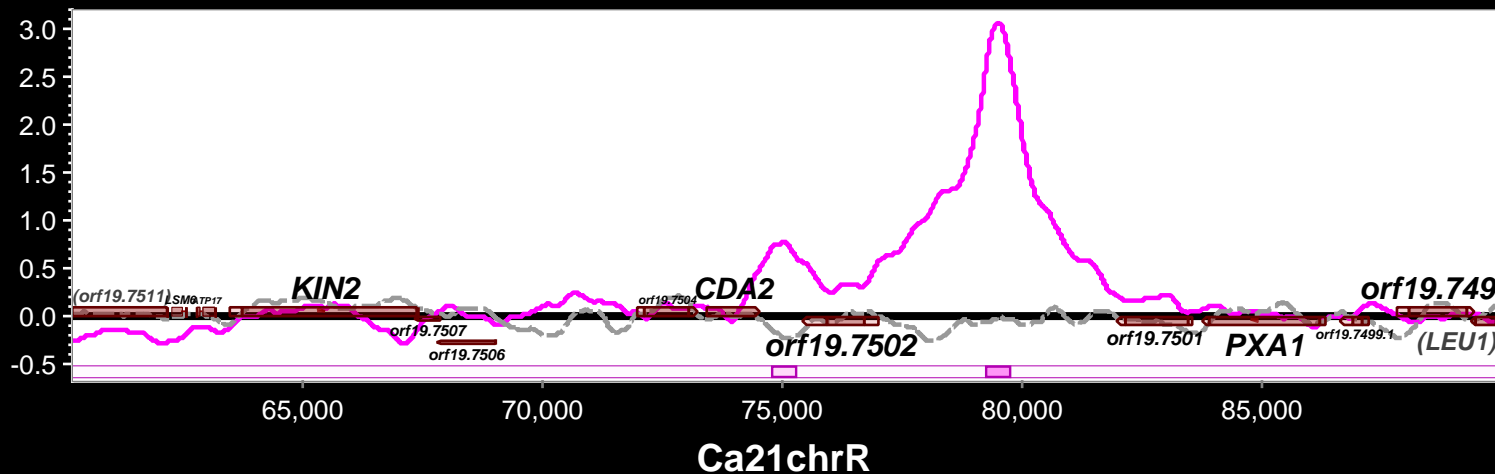

[0.758] Ca21chr1:1818726-1848409 [+] [orf19.5114.1, orf19.5114, OLE1, ADH2, SDS24]

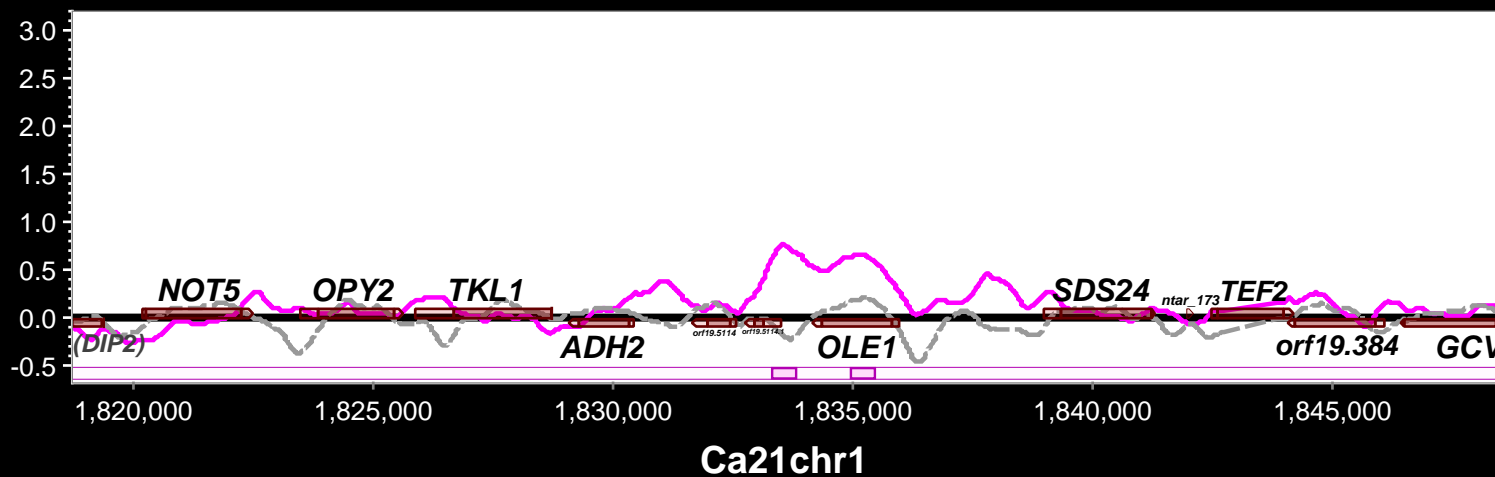

[0.757] Ca21chr6:149741-179424 [+] [GPX2, orf19.86, CAN3, GPX1, SUN41]

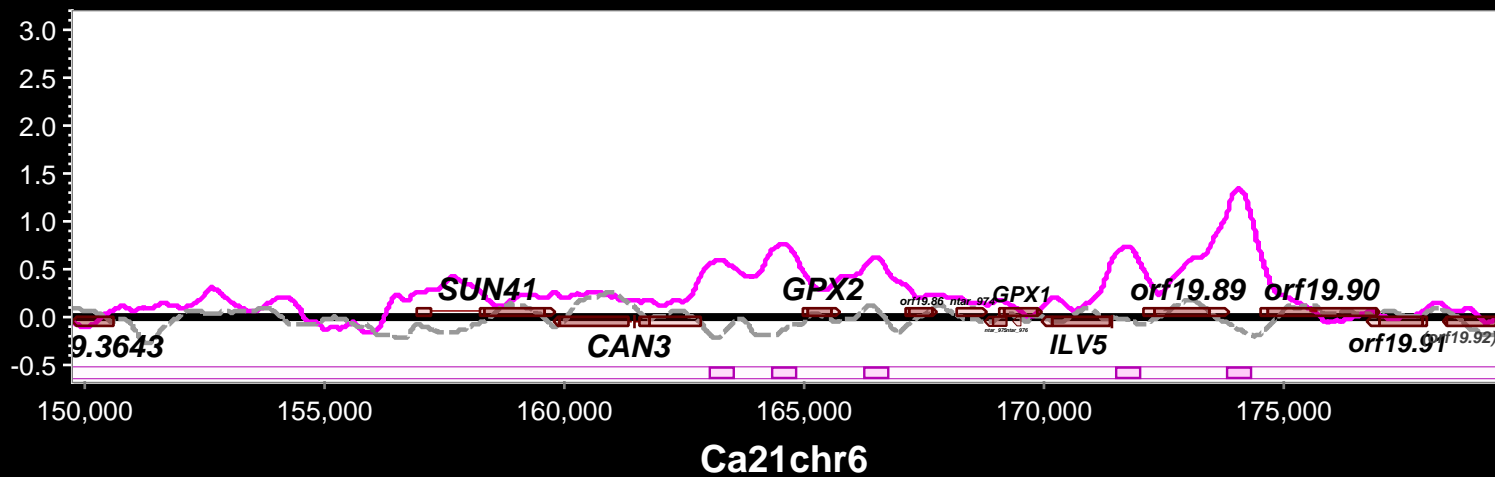

[0.756] Ca21chr4:551834-581517 [+] [orf19.2725, orf19.2724, orf19.2726, GRX3, HIT1]

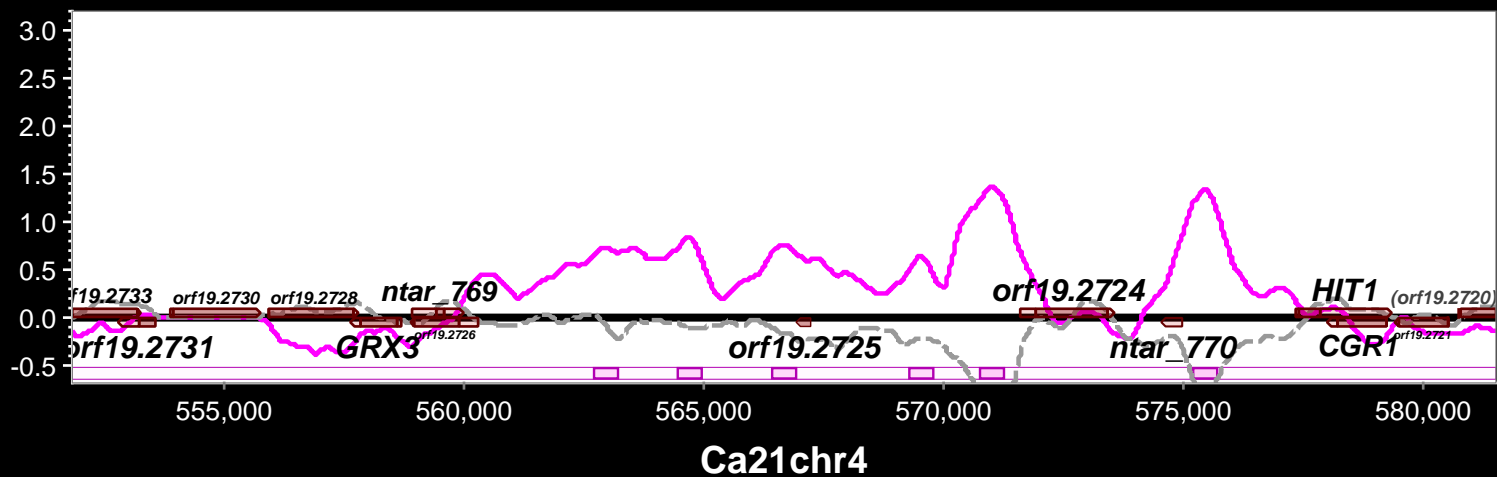

[0.755] Ca21chr5:808925-838608 [+] [orf19.1123, orf19.1124, orf19.1122, orf19.1124.2, orf19.1121]

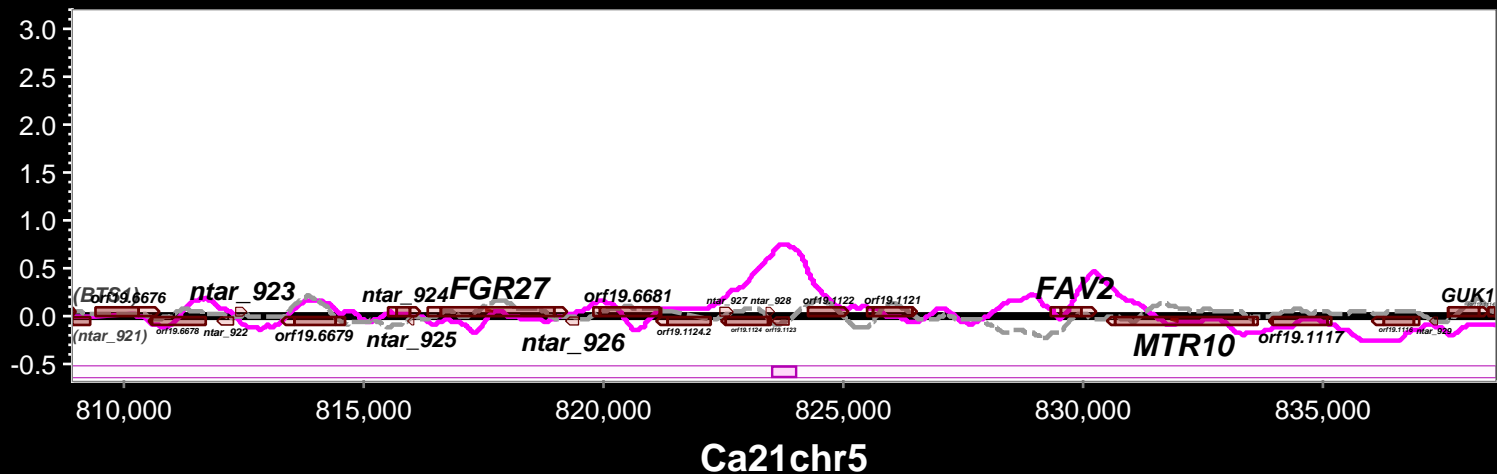

[0.754] Ca21chrR:1253495-1283178 [+] [SOK1, SFL1, orf19.3848, orf19.3851, orf19.3852]

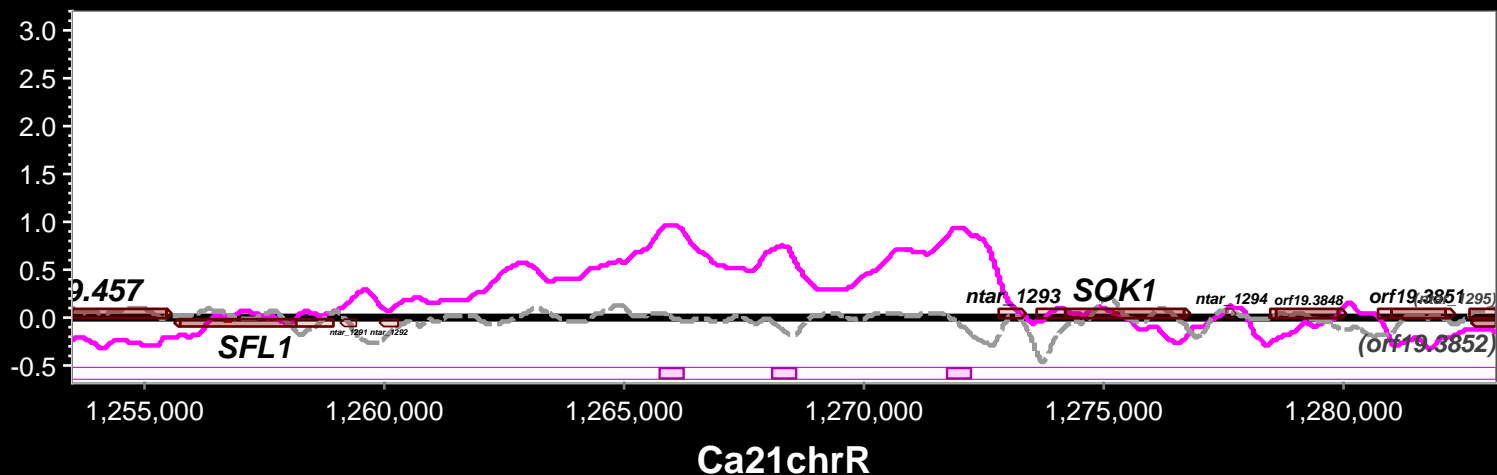

[0.751] Ca21chr3:269298-298981 [+] [orf19.1718, SGA1, orf19.1717, orf19.1720, URA3]

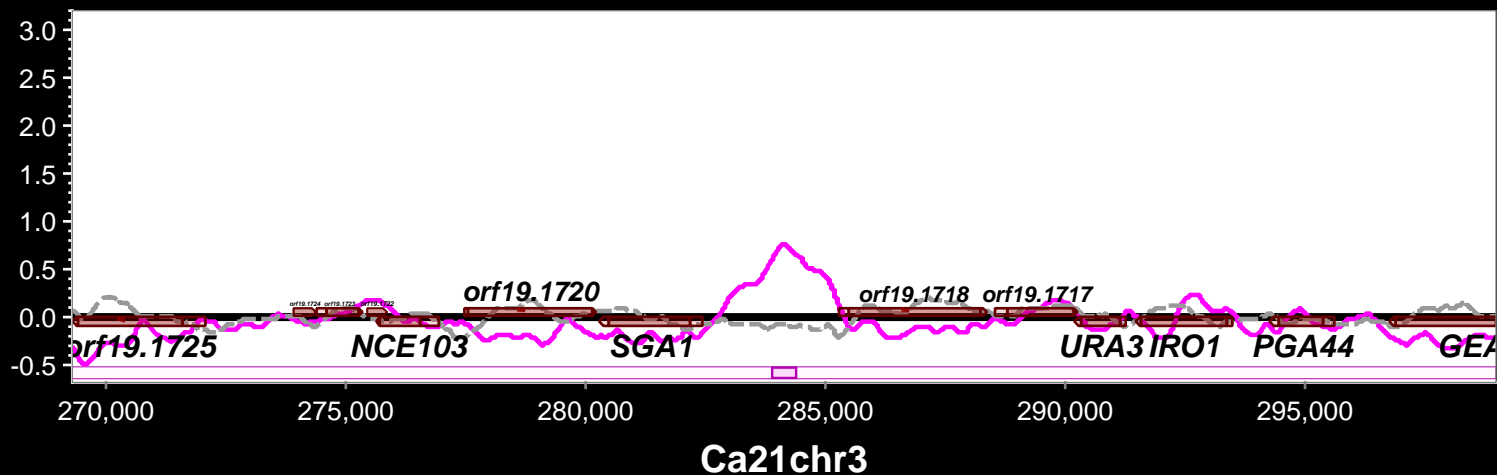

[0.751] Ca21chr6:315689-345372 [+] [orf19.3427, ANB1, orf19.3428, orf19.3425, FGR47]

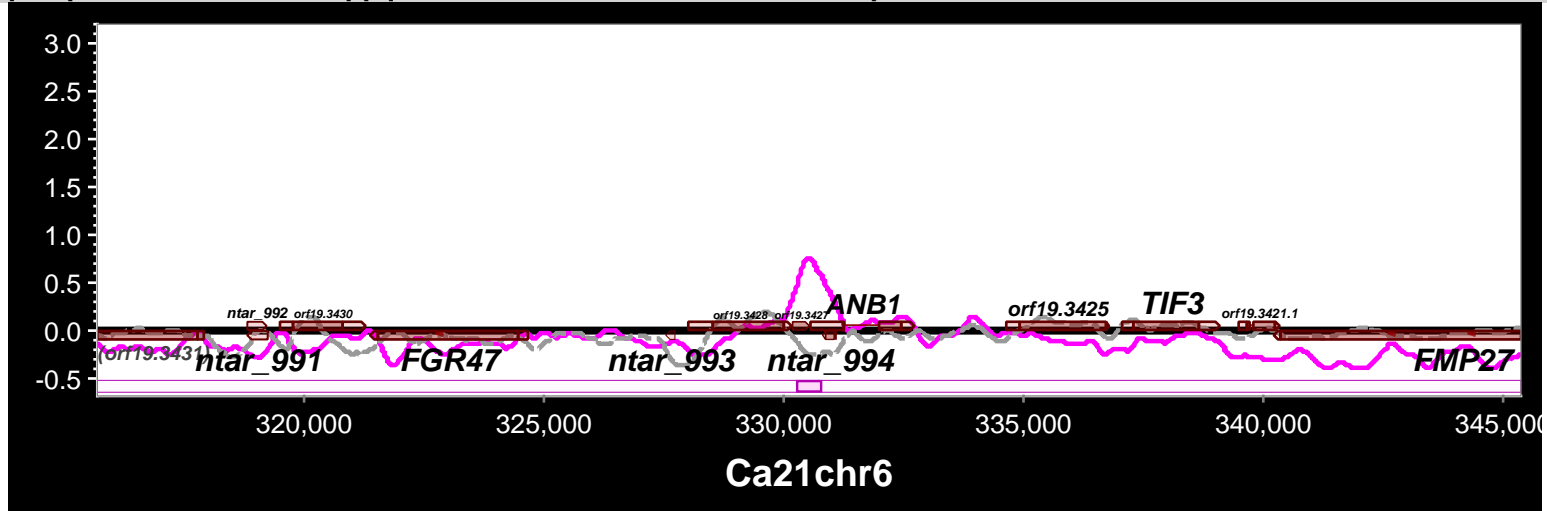

[0.749] Ca21chr3:1633824-1663507 [+] [orf19.6781, BMT1, MET8, PRO2, orf19.6778]

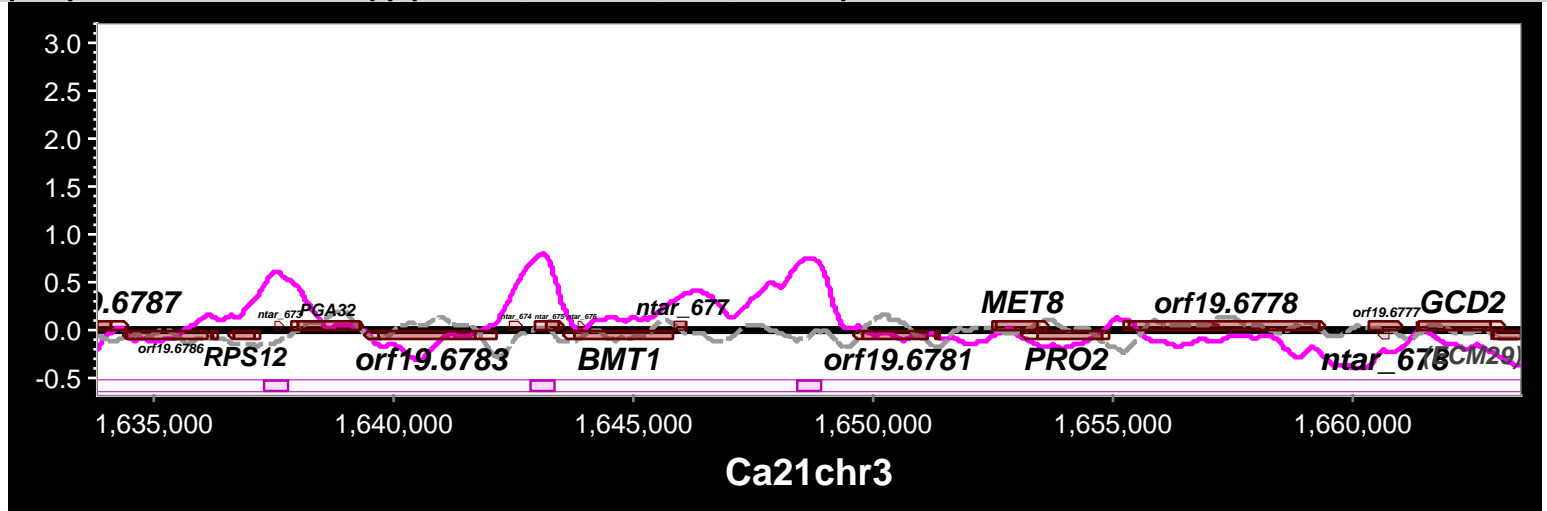

[0.747] Ca21chr7:55659-85342 [+] [orf19.7077, orf19.7078, orf19.7079, orf19.7076, orf19.7074]

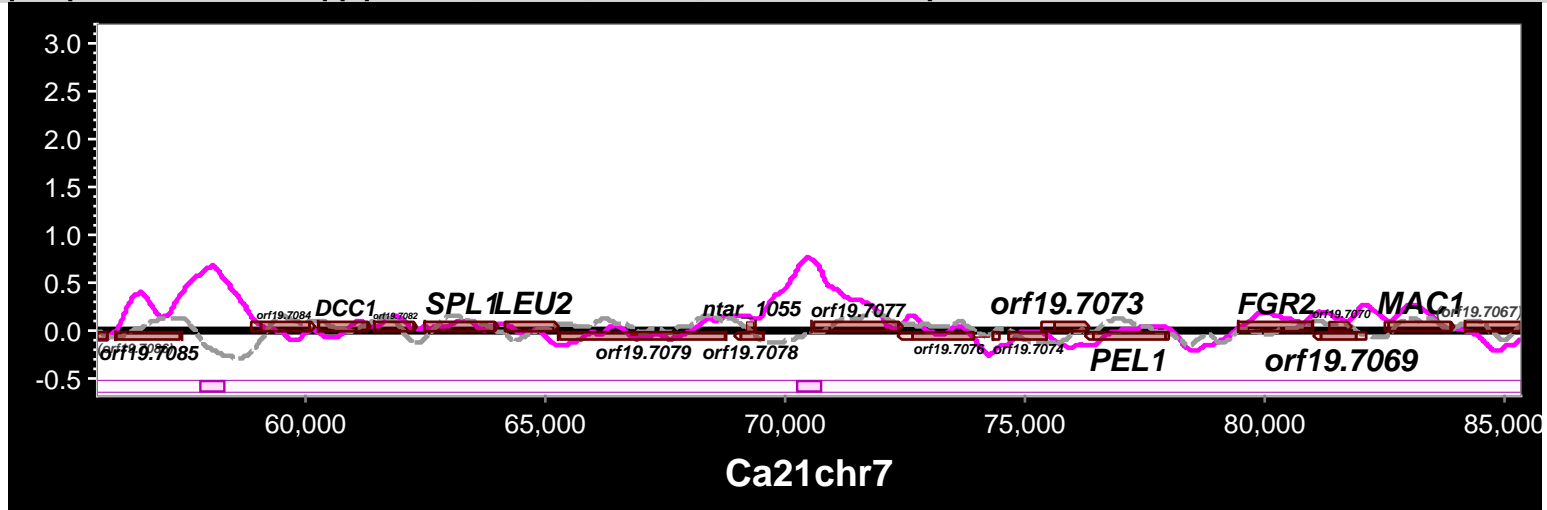

[0.747] Ca21chrR:715833-745516 [+] [orf19.2397.3, orf19.2398, orf19.2399, orf19.2397, orf19.2400]

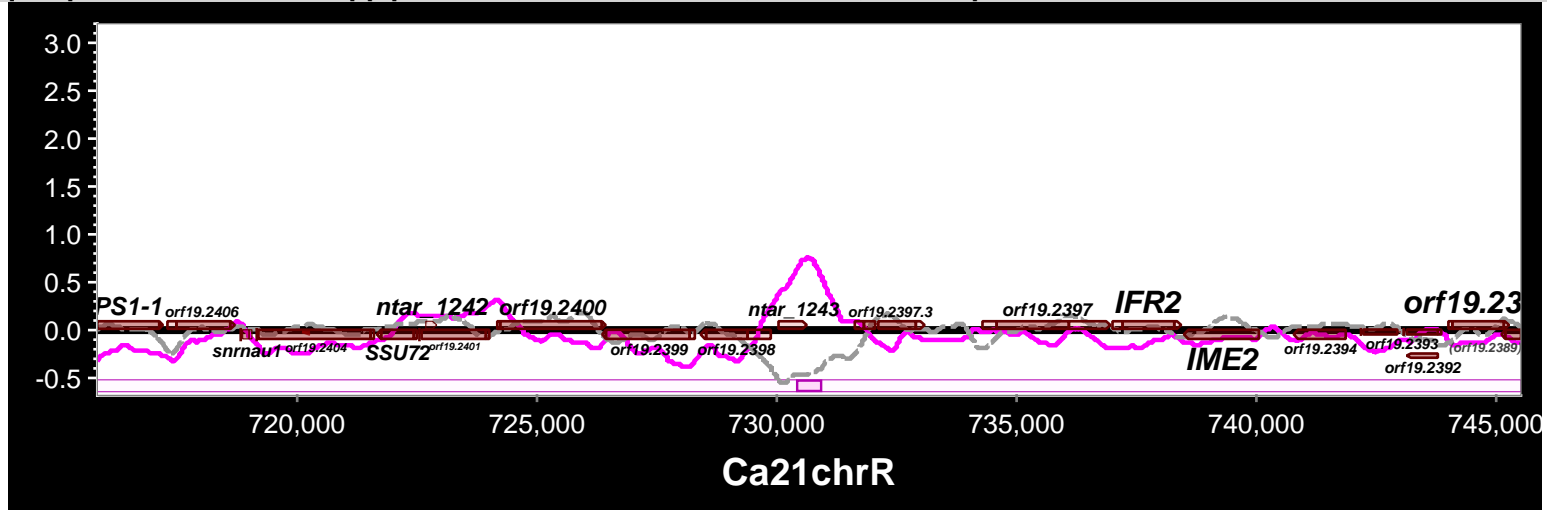

[0.746] Ca21chr1:2977742-3007425 [+] [orf19.4998, KIS2, CYB2, orf19.4996, CUP2]

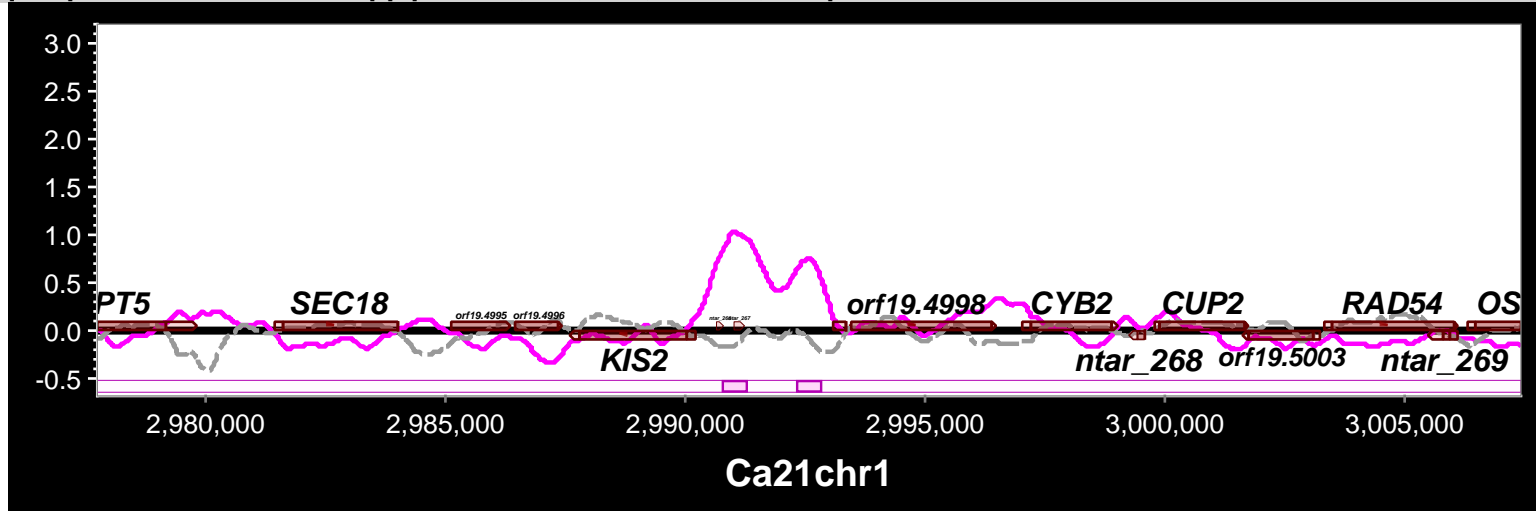

[0.745] Ca21chr3:782525-812208 [+] [PTR2, MEU1, RAD53, orf19.6941, orf19.6934]

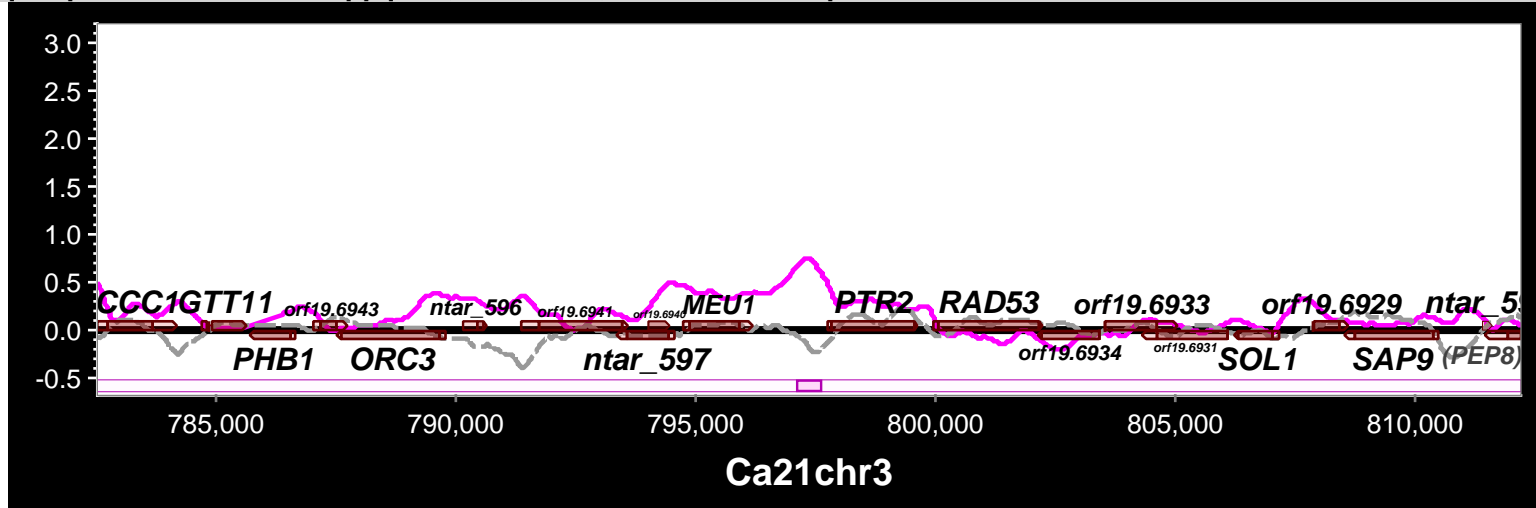

[0.745] Ca21chr7:286396-316079 [+] [orf19.6585, PRT1, orf19.6586, orf19.6583, PRE10]

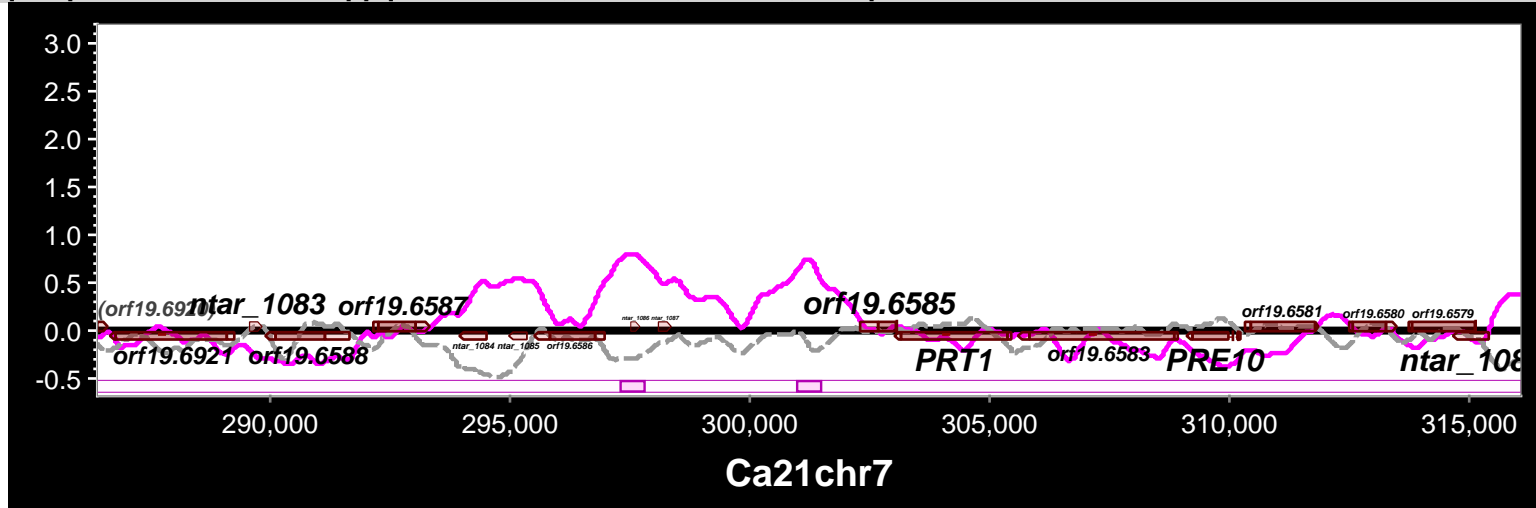

[0.745] Ca21chrR:39444-69127 [+] [orf19.7512, orf19.7513, orf19.7511, PCK1, LSM6]

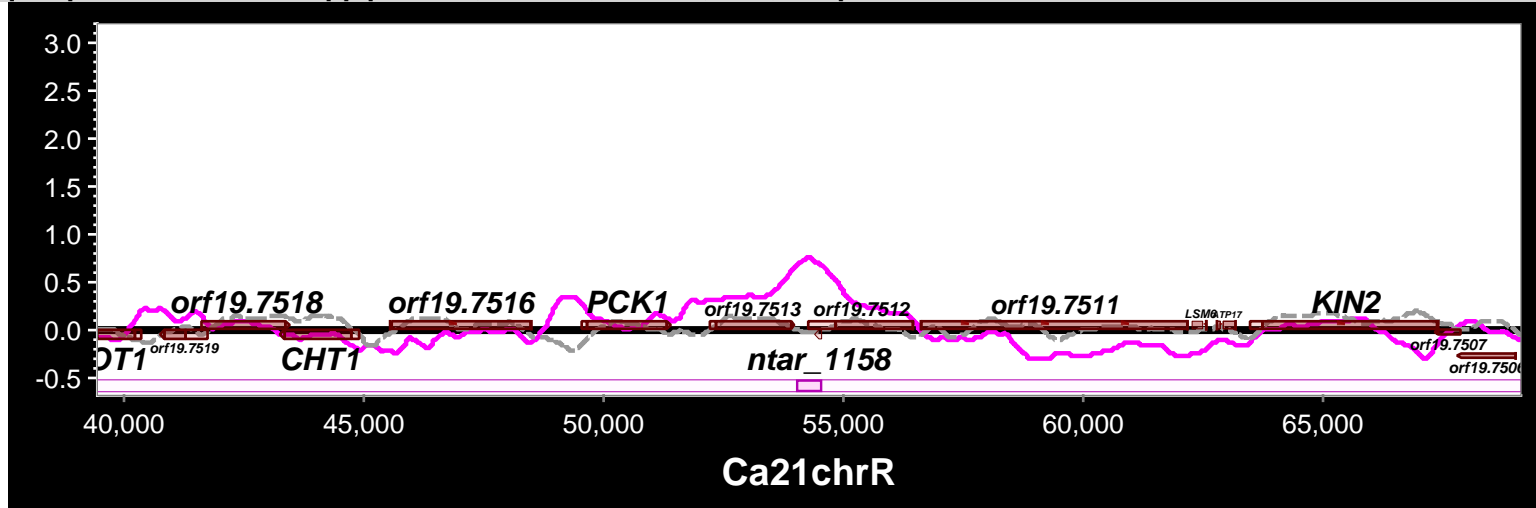



[0.744] Ca21chr4:507158-536841 [+] [RGT1, orf19.2748, orf19.2746, orf19.2745]

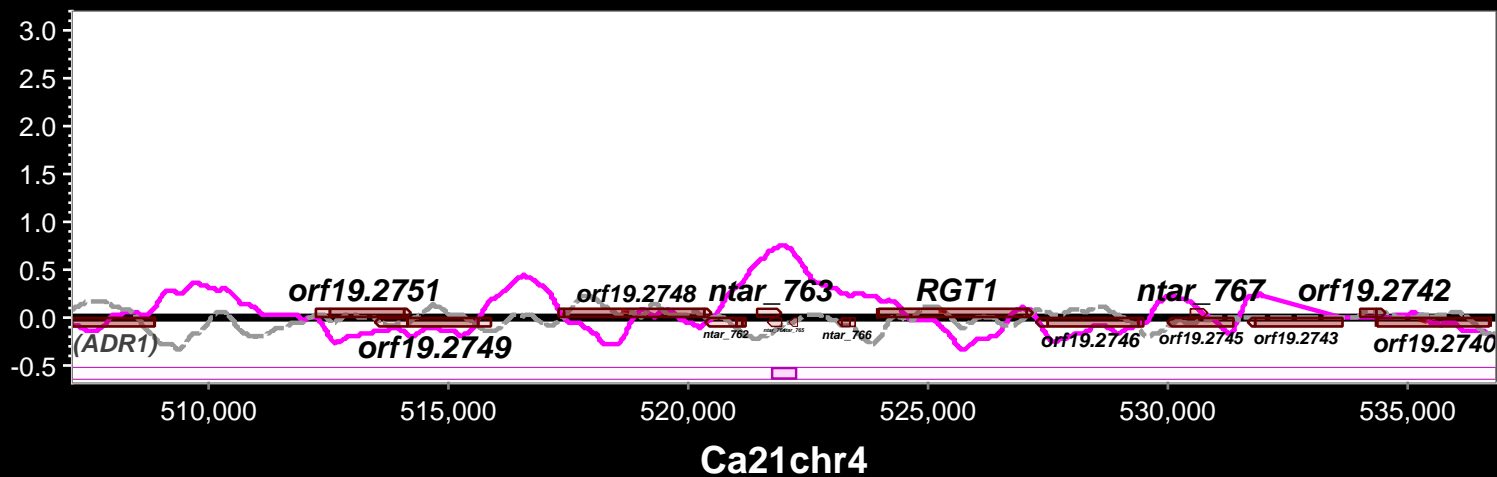

[0.744] Ca21chr6:202376-232059 [+] [FAD2, orf19.117, orf19.115, orf19.119, orf19.120]

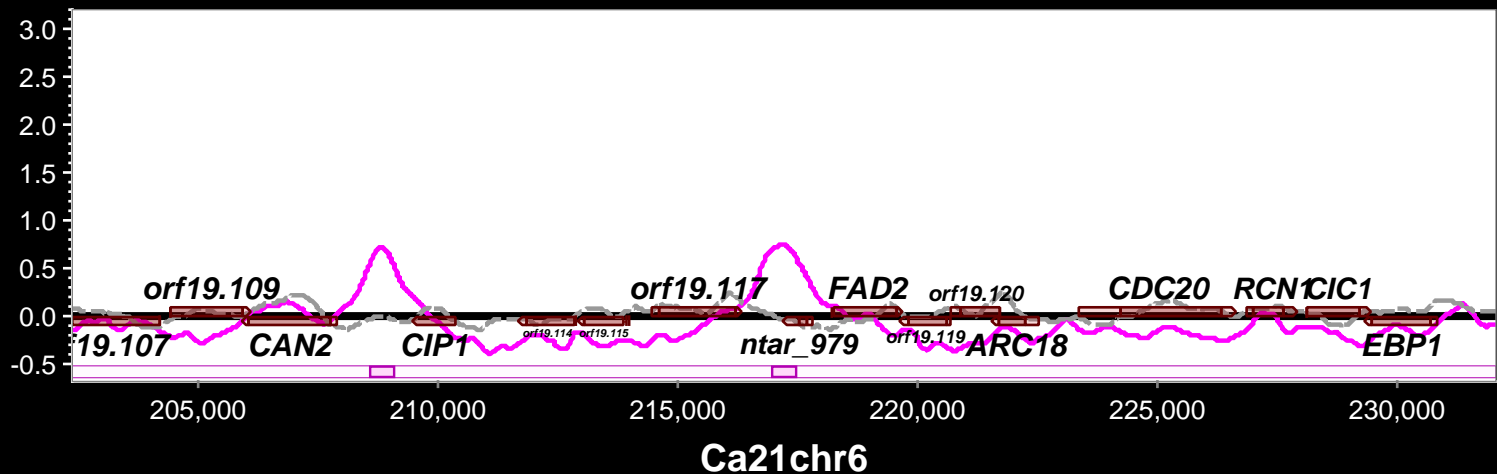

[0.743] Ca21chr1:997167-1026850 [+] [SAP7, orf19.757, MRPL37, orf19.757.1, YBN5]

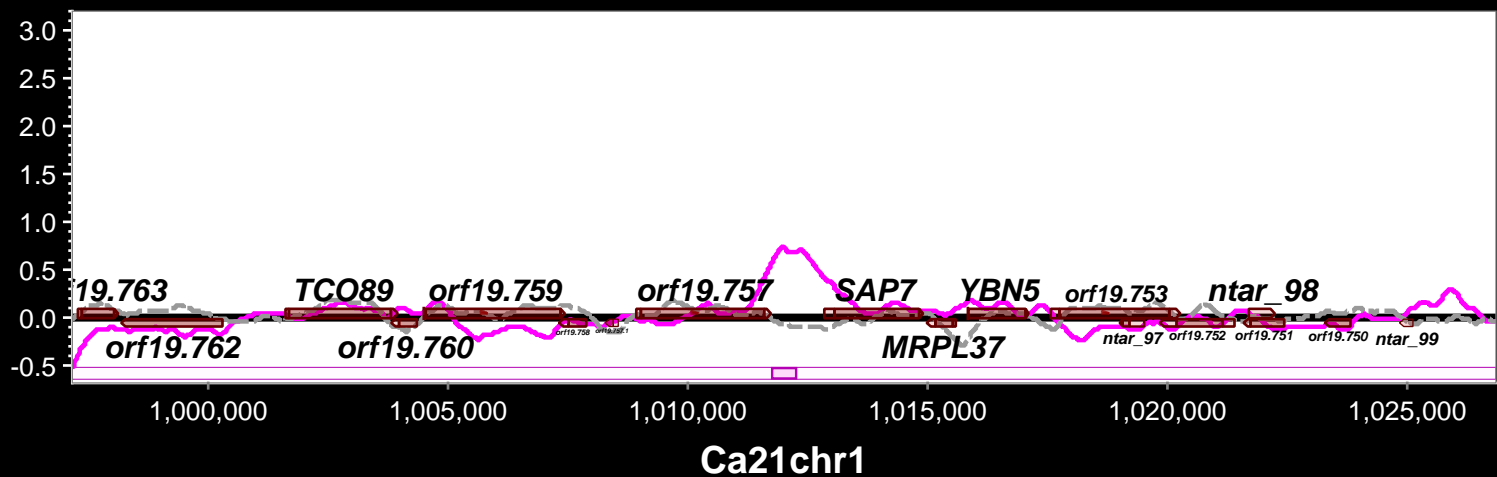

[0.741] Ca21chr3:182636-212319 [+] [FLC1, tG(UCC)1, orf19.2500, orf19.2499, orf19.2503]

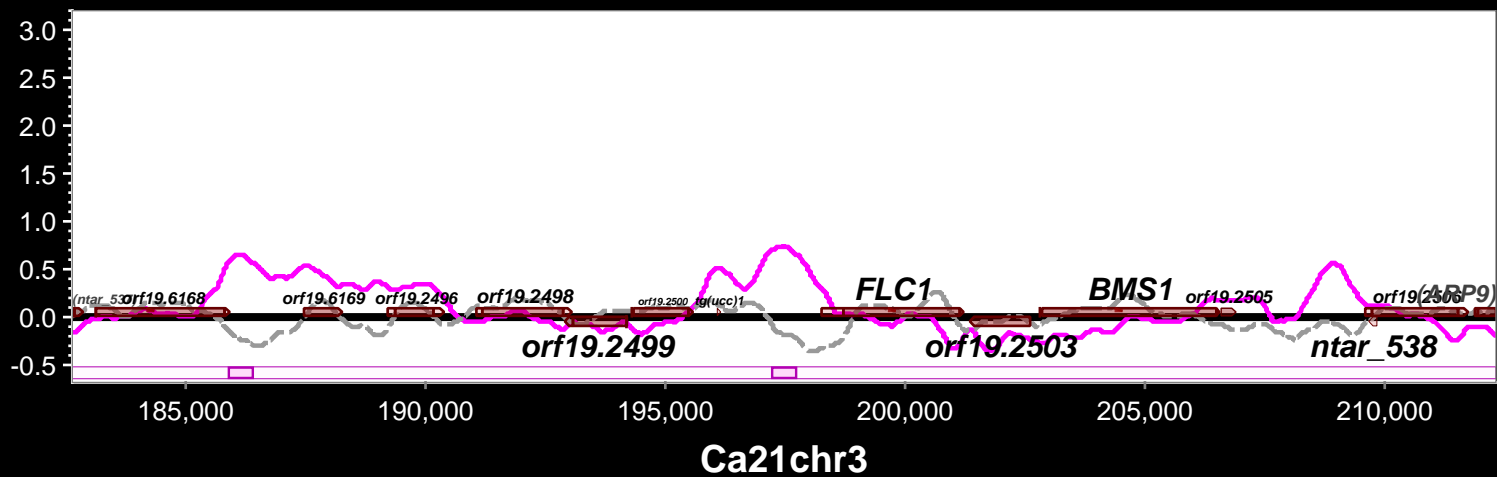

[0.741] Ca21chrR:170802-200485 [+] [orf19.3277, GSY1, PWP2, orf19.3275, HYR4]

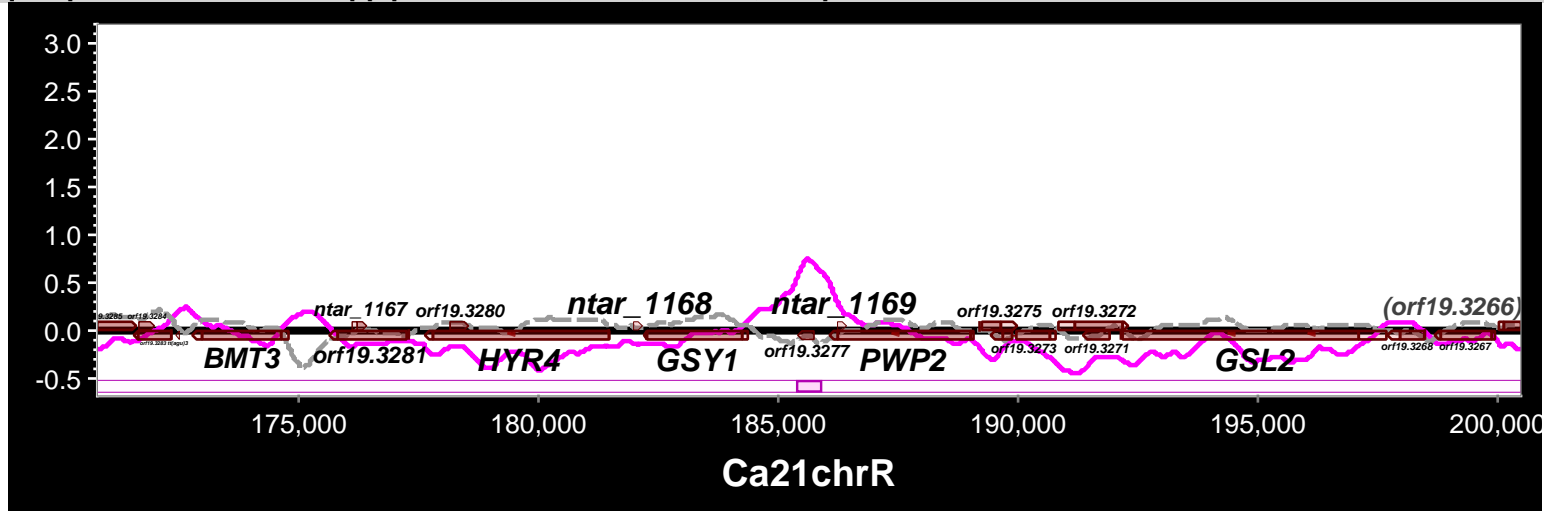

[0.74] Ca21chrR:751213-780896 [+] [orf19.4390, orf19.4388, HXT5, orf19.4391, orf19.2376]

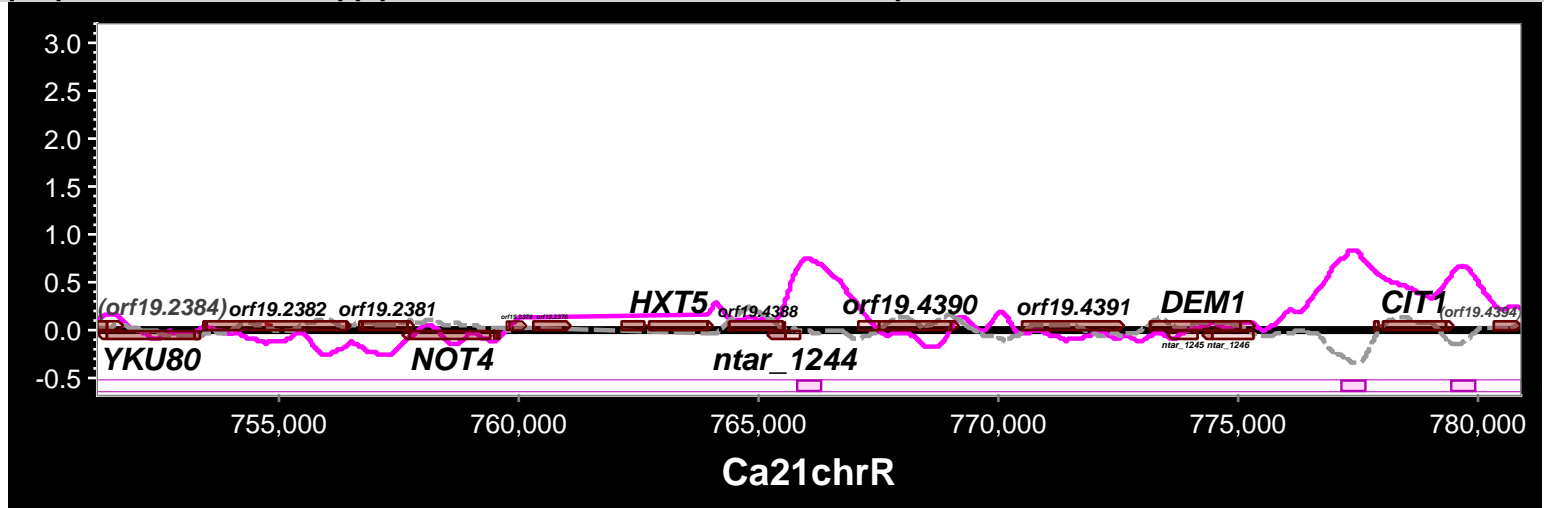

[0.738] Ca21chr1:2924543-2954226 [+] [orf19.4972, HYR1, orf19.4970, KEM1, orf19.4976]

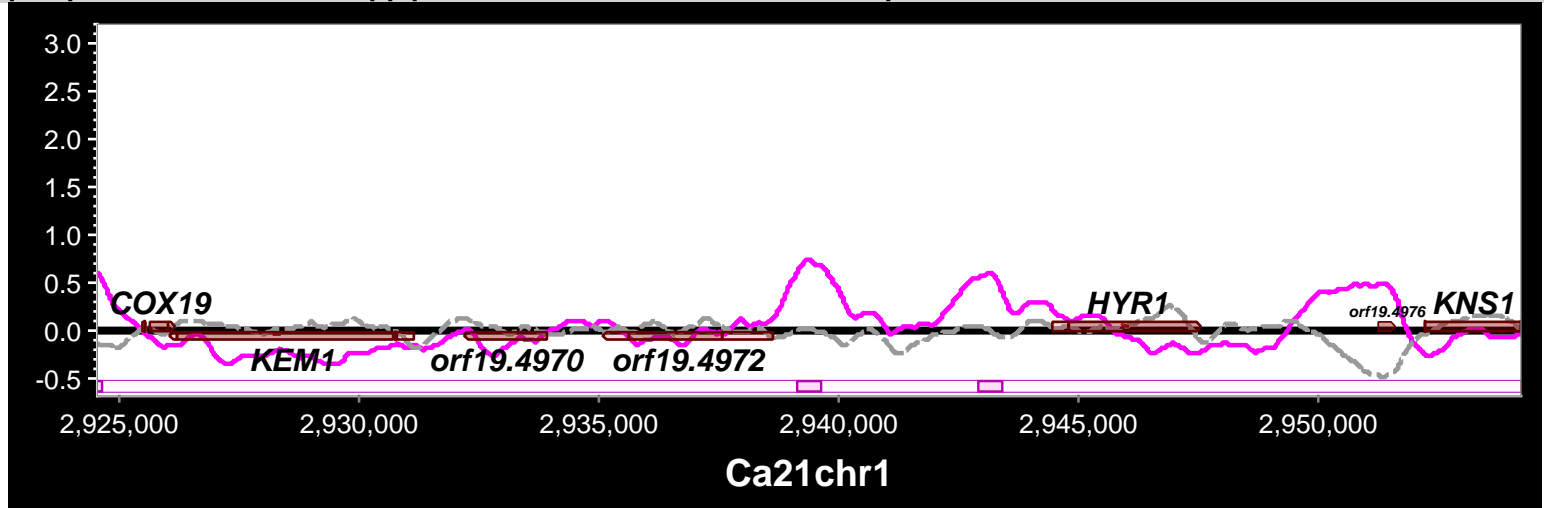

[0.738] Ca21chr5:105670-135353 [+] [orf19.934, orf19.933, orf19.932, AGA1, orf19.931]

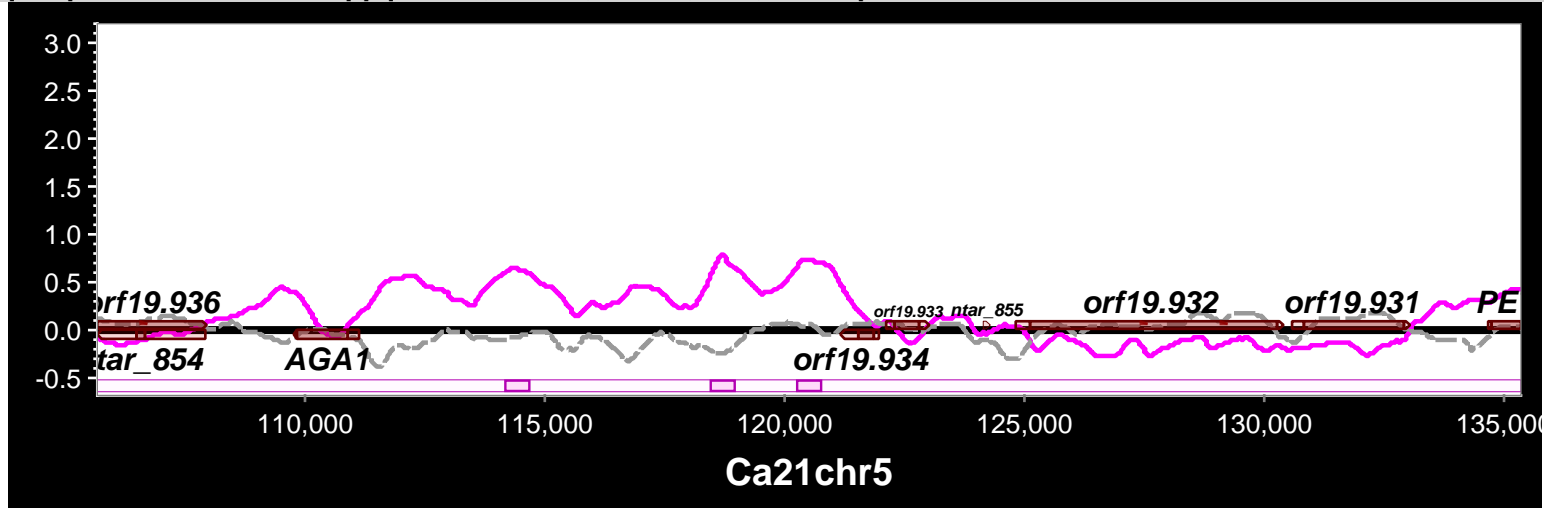

[0.737] Ca21chr5:1041506-1071189 [+] [orf19.3969, orf19.3970, orf19.3971, orf19.3972, orf19.3968]

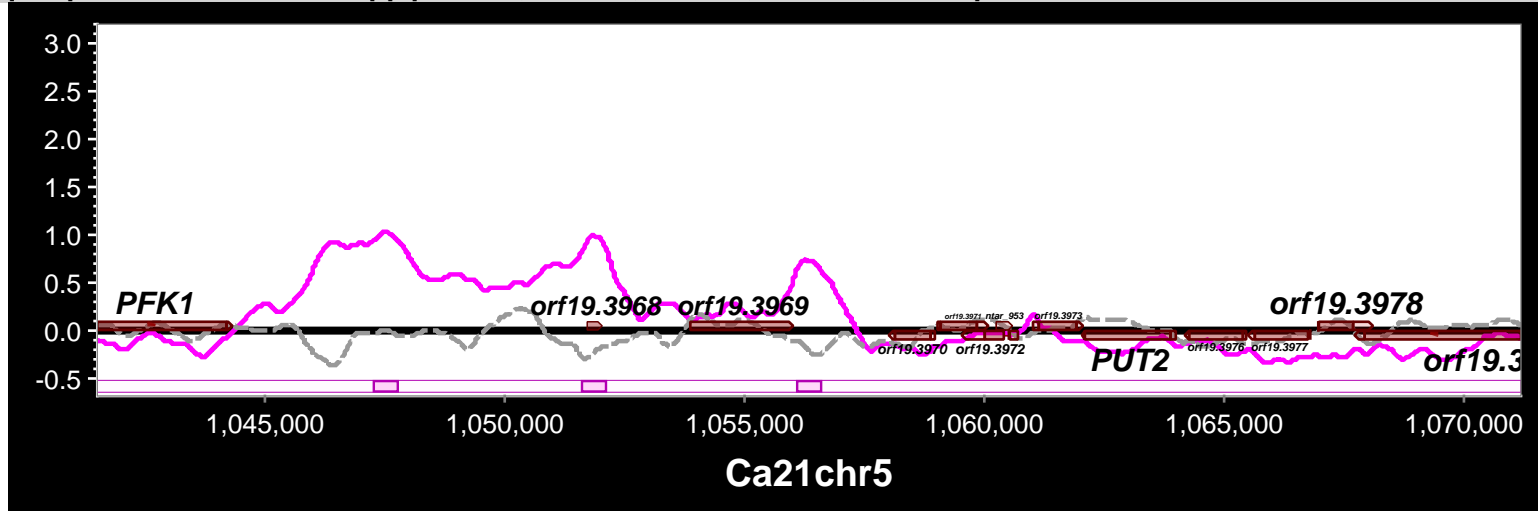

[0.737] Ca21chr2:509392-539075 [+] [ZRT2, FGR22, orf19.1584, HGT20, orf19.1588]

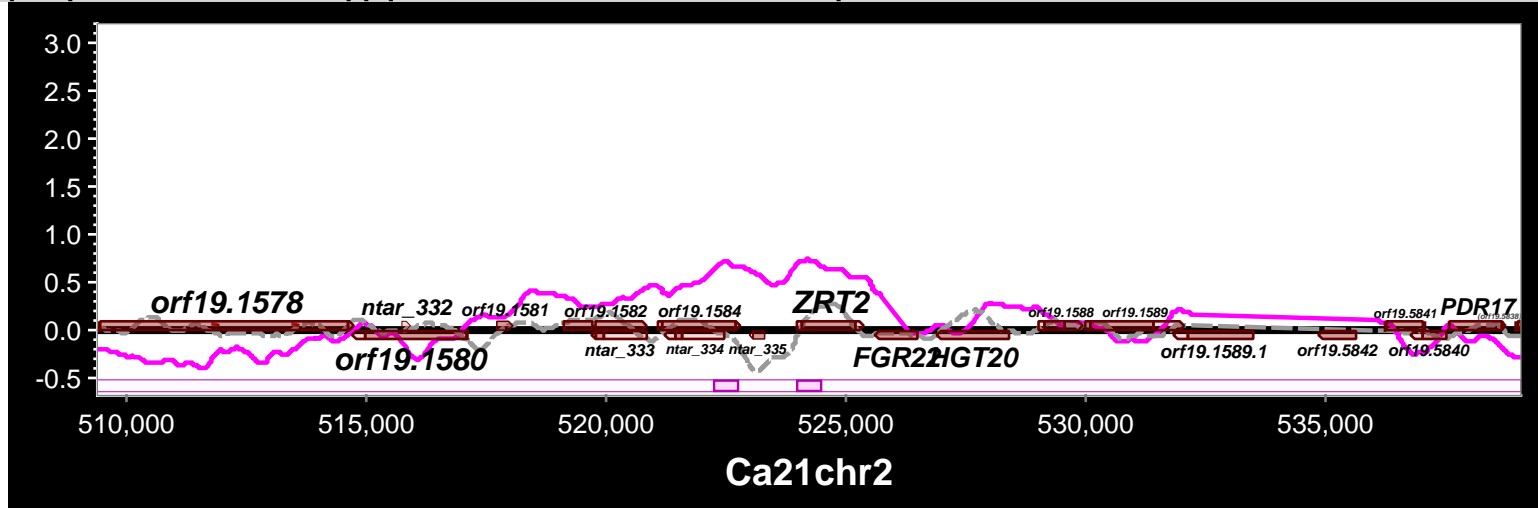

[0.737] Ca21chr4:841814-871497 [+] [orf19.5311, orf19.5312, orf19.5308, orf19.1208, JEN2]

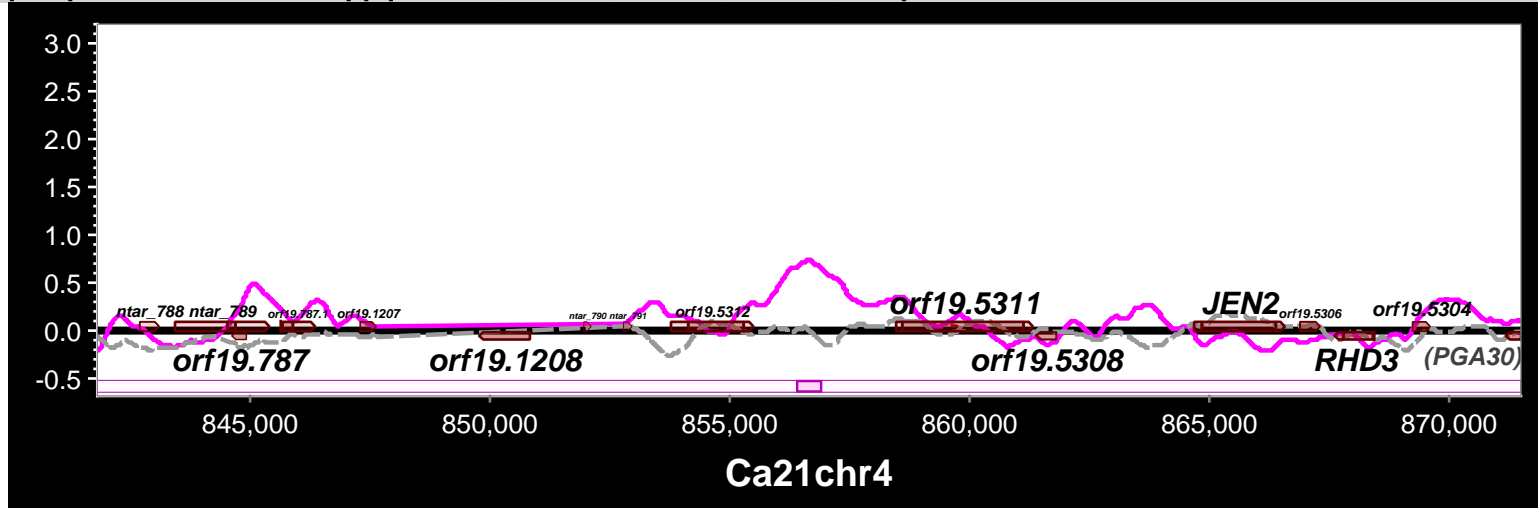

[0.737] Ca21chr5:479947-509630 [+] [orf19.4230, orf19.4229, PTH2, orf19.4228, orf19.4227]

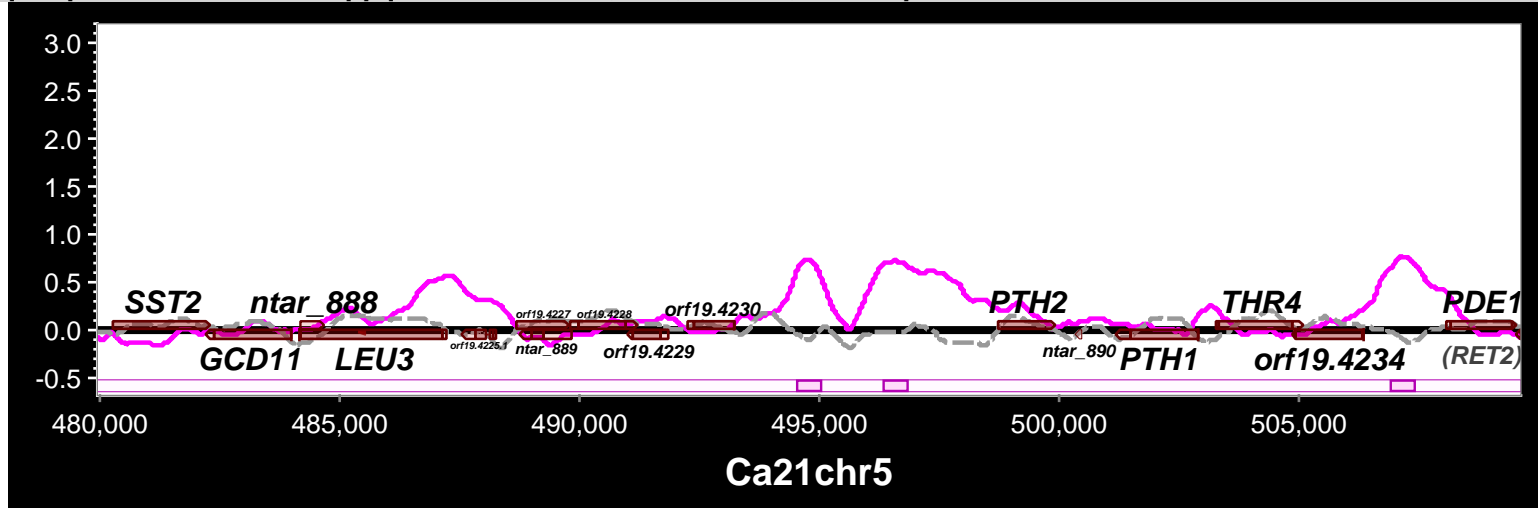

[0.736] Ca21chr1:889437-919120 [+] [orf19.5203, orf19.5201.1, orf19.5201, SIT4, orf19.1070]

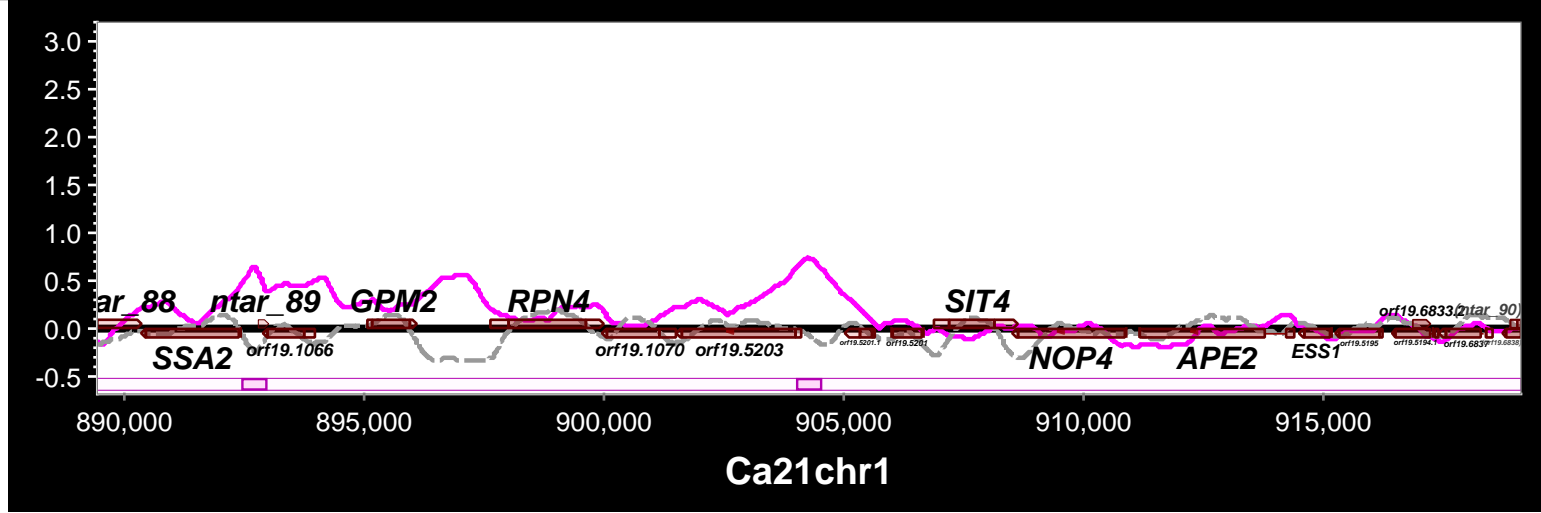

[0.735] Ca21chr5:1139399-1169082 [+] [HIS1, orf19.4028, orf19.4029, PRE1, RIB5]

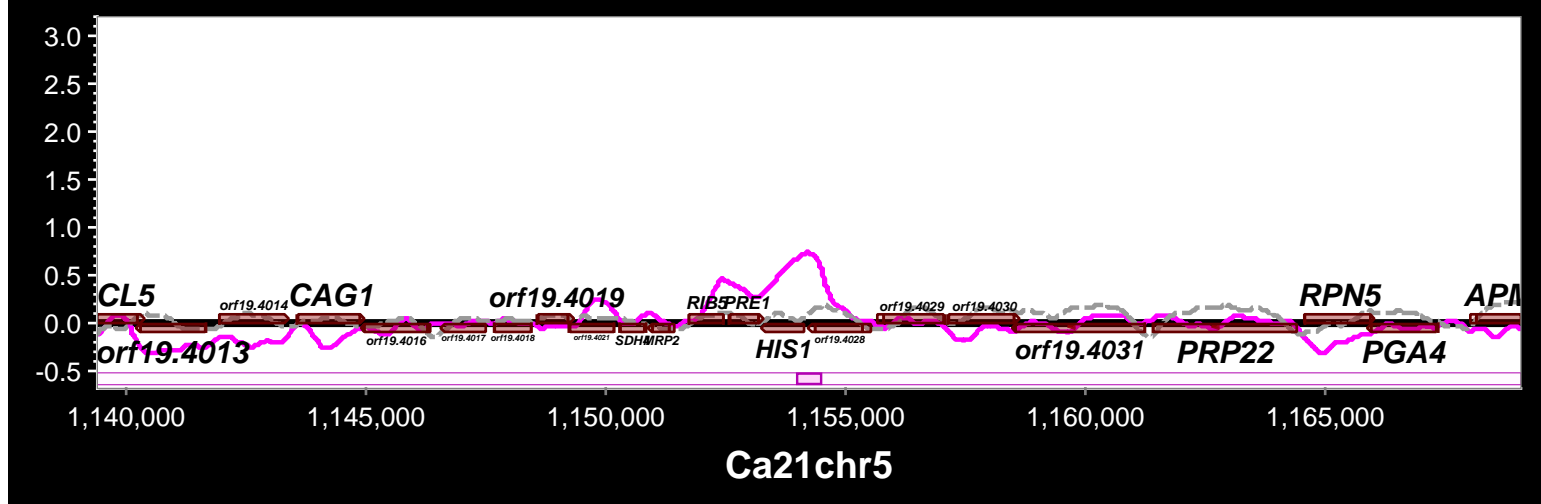

[0.734] Ca21chr5:842416-872099 [+] [PGA56, orf19.1105, orf19.1105.3, orf19.3220, orf19.3219]

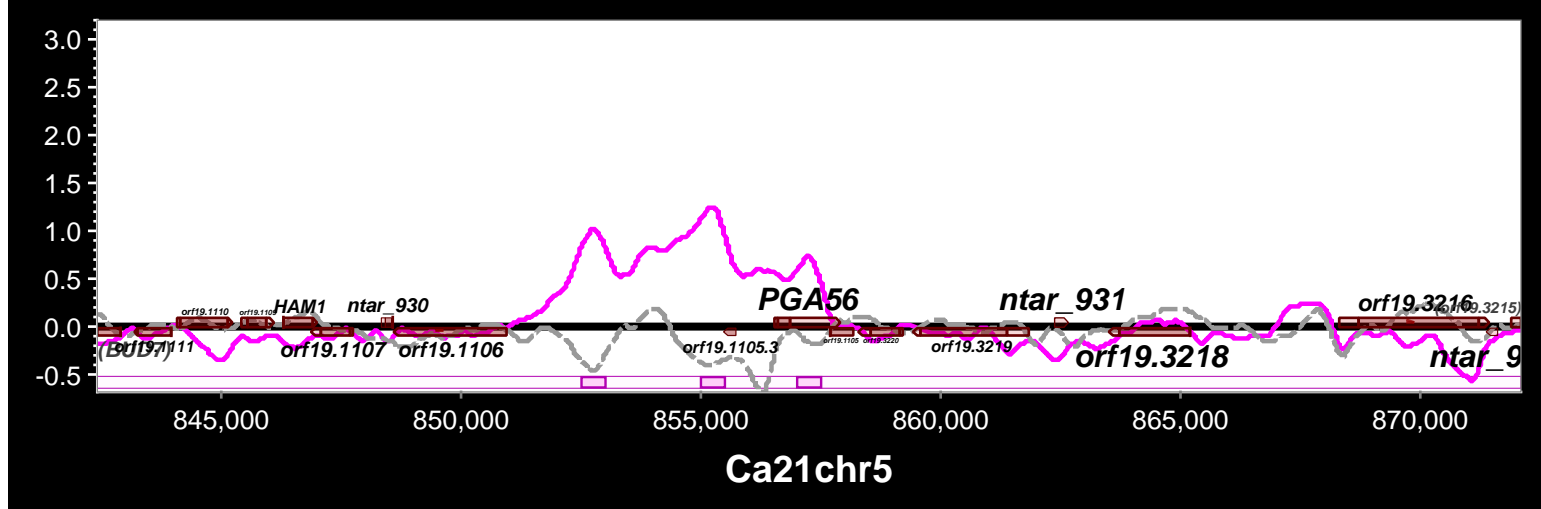

[0.731] Ca21chr2:2091730-2121413 [+] [GPD1, orf19.1757, SET2, PHO23, orf19.1754]

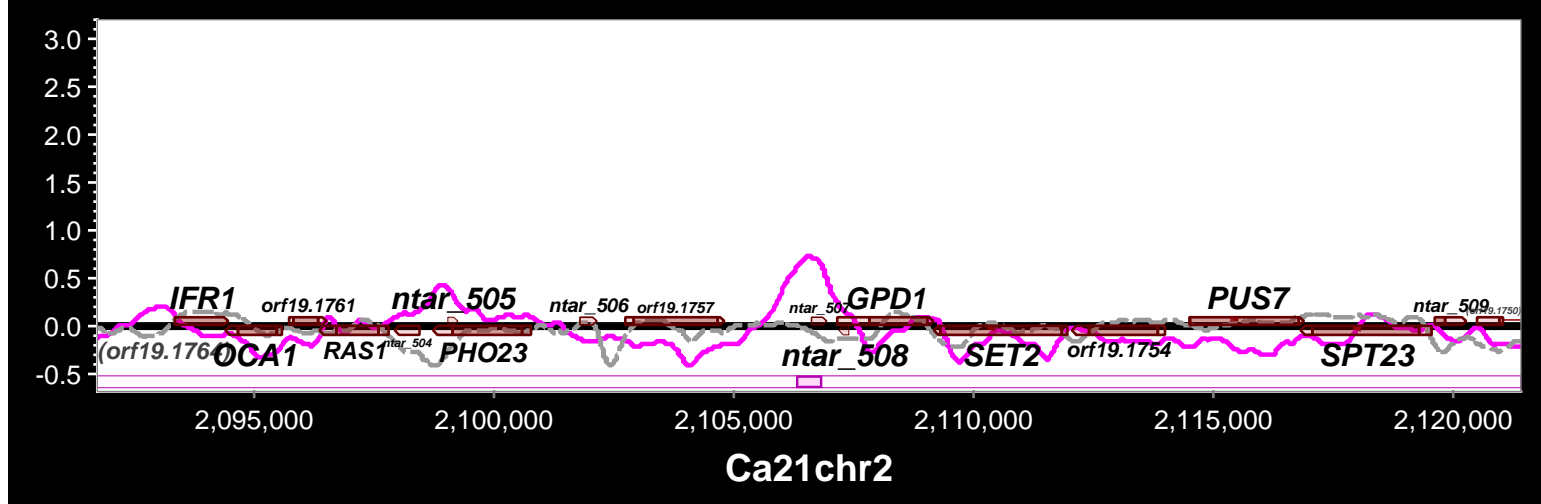

[0.728] Ca21chr5:578564-608247 [+] [orf19.4280, MNN1, orf19.4278, orf19.4282]

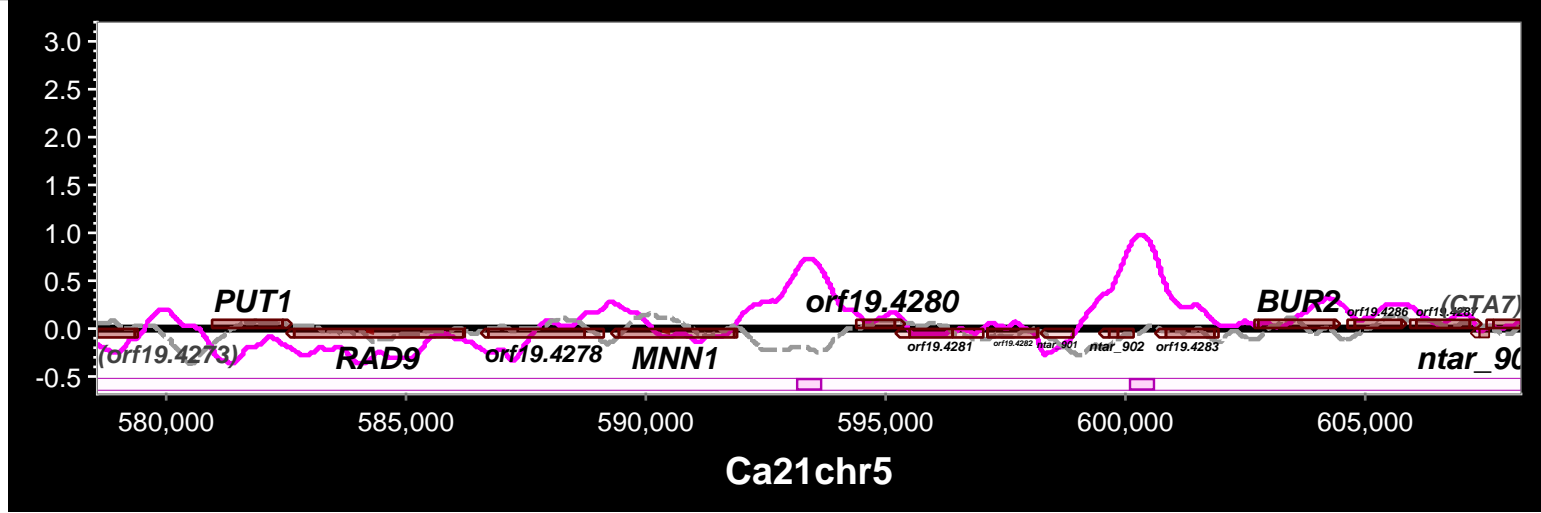

[0.728] Ca21chr6:156914-186597 [+] [ILV5, orf19.89, GPX1, orf19.90, orf19.86]

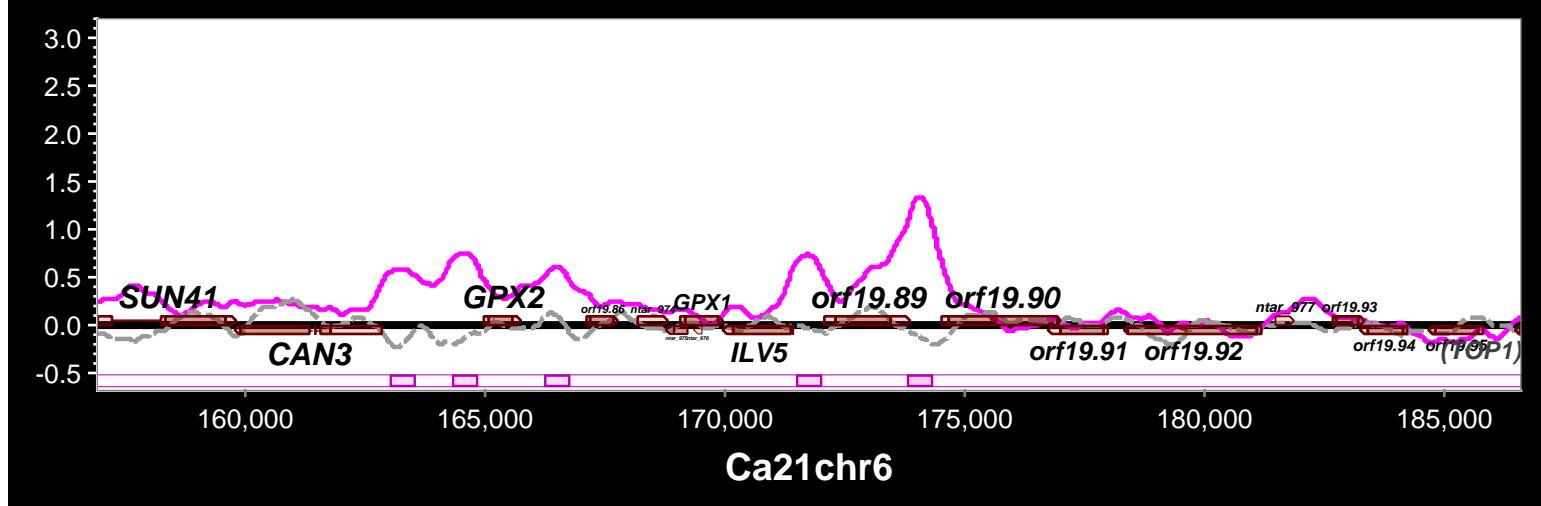

[0.727] Ca21chr3:1710690-1740373 [+] [orf19.6736, TCC1, orf19.6732, orf19.6731.1, orf19.6731]

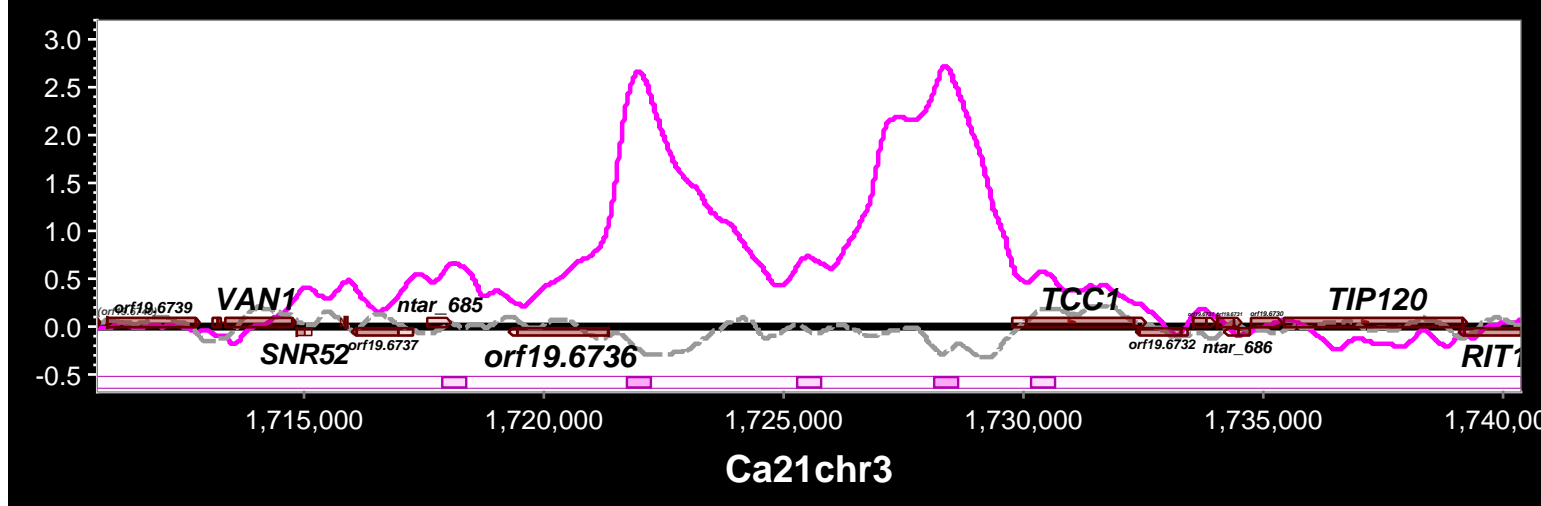

[0.724] Ca21chr2:1729818-1759501 [+] [YWP1, orf19.3621, orf19.3617, ERG9, ANP1]

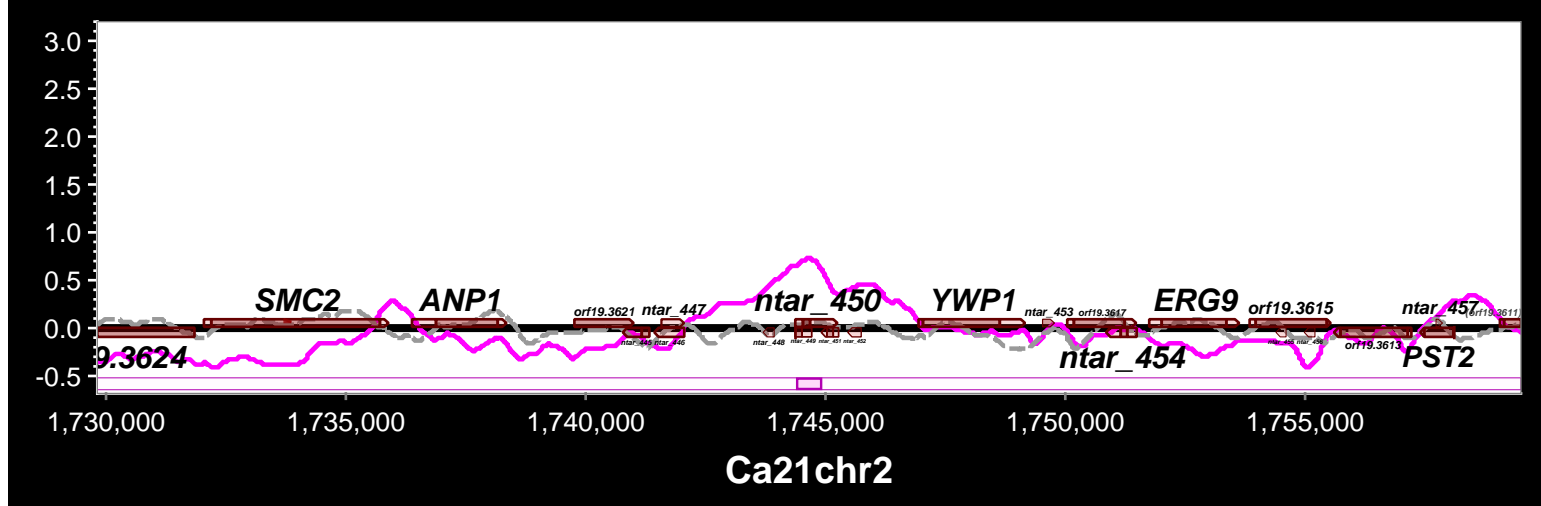

[0.72] Ca21chr1:1306892-1336575 [+] [orf19.1821, UME6, orf19.1823, PGA50, orf19.1825]

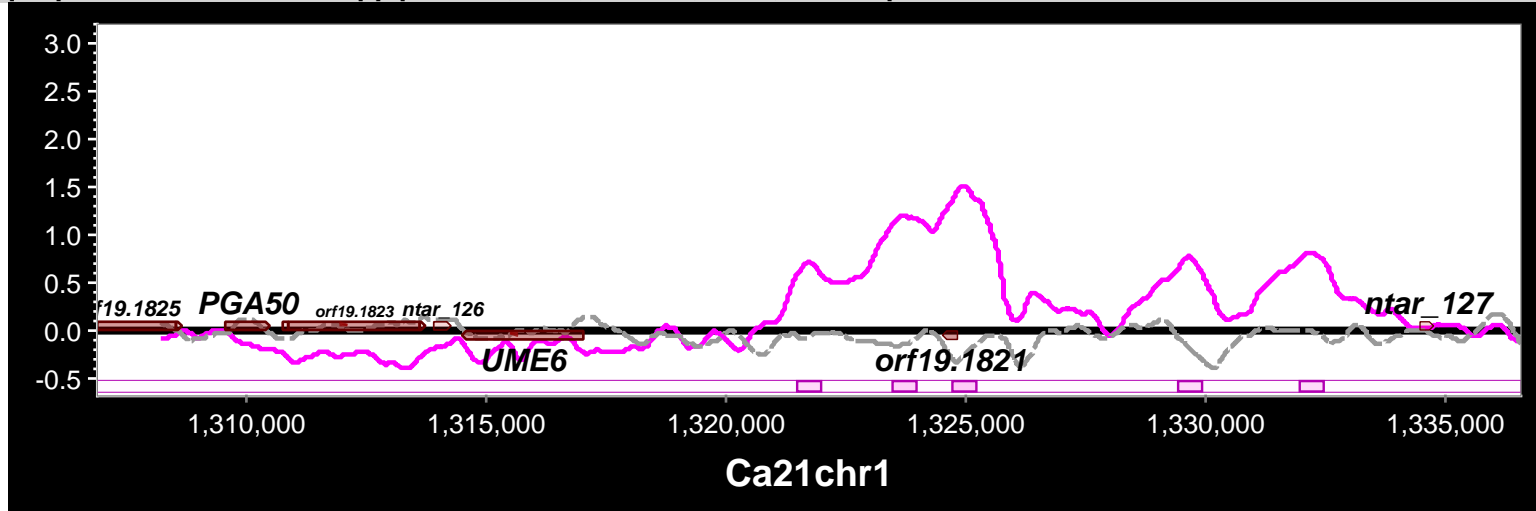

[0.719] Ca21chr7:1242-30925 [+] [SOD3, orf19.7111, orf19.7110, FRP2, orf19.7109]

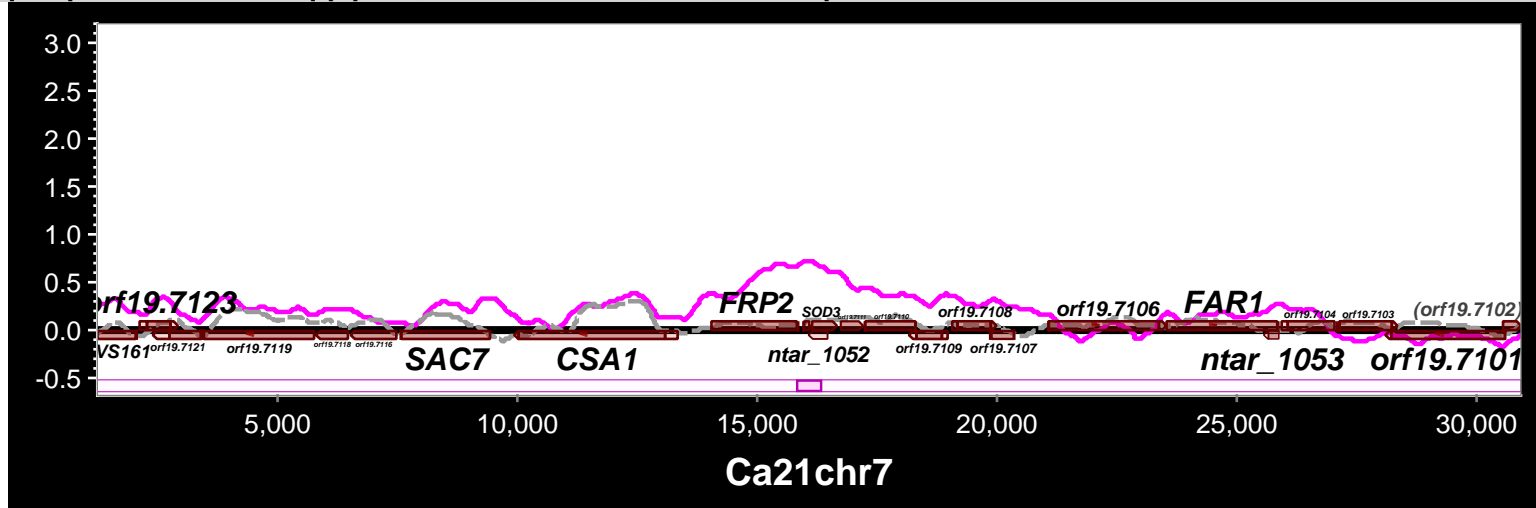

[0.718] Ca21chr2:1665743-1695426 [+] [orf19.1351, orf19.1350, orf19.1352, orf19.1349, orf19.1353]

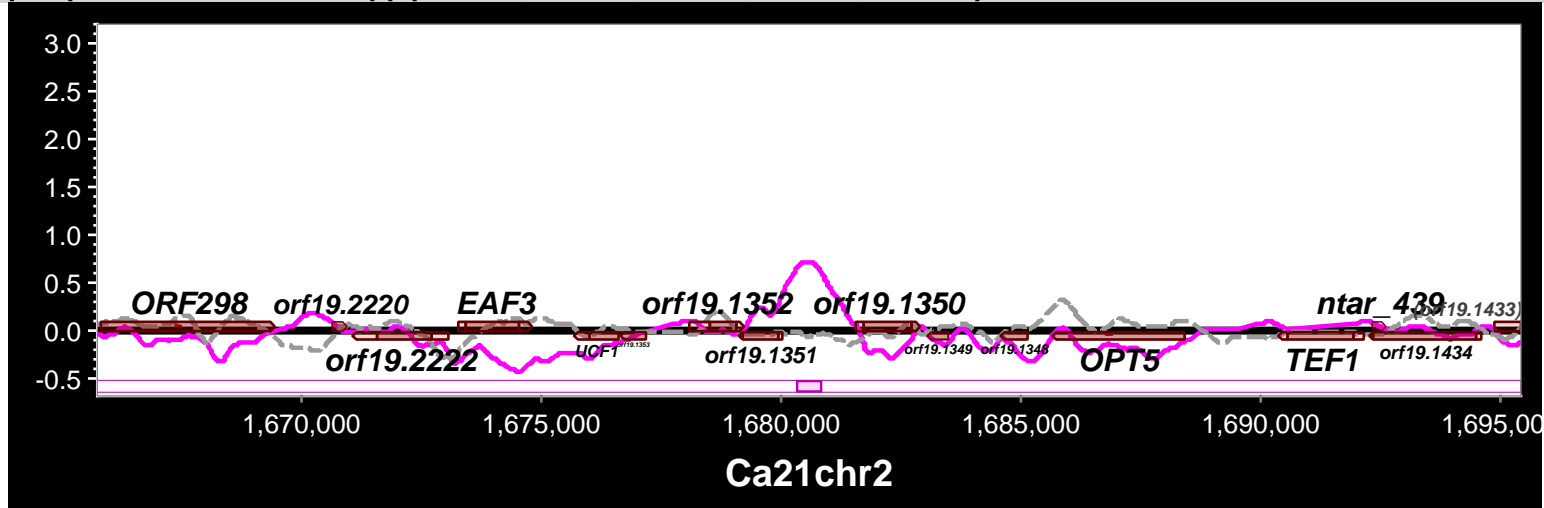

[0.718] Ca21chr6:470170-499853 [+] [orf19.3475, IPL1, orf19.3476, orf19.3473, orf19.3471]

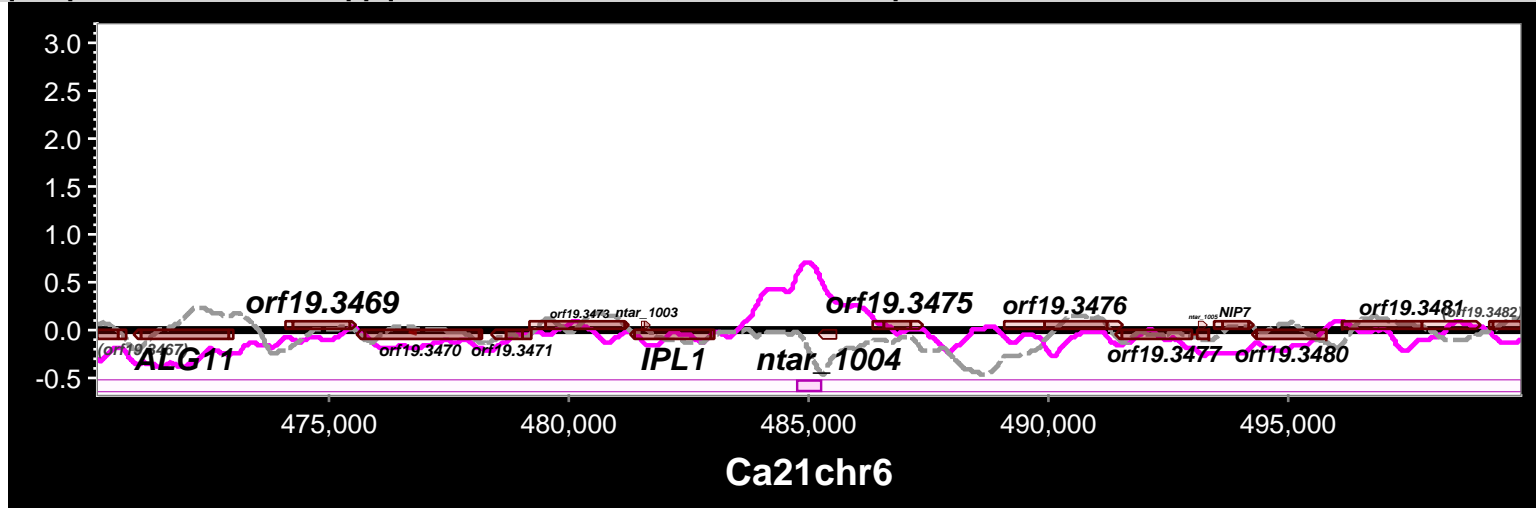

[0.717] Ca21chr1:906431-936114 [+] [orf19.6840, orf19.6838, orf19.6837, orf19.5194.1, orf19.6833.2]

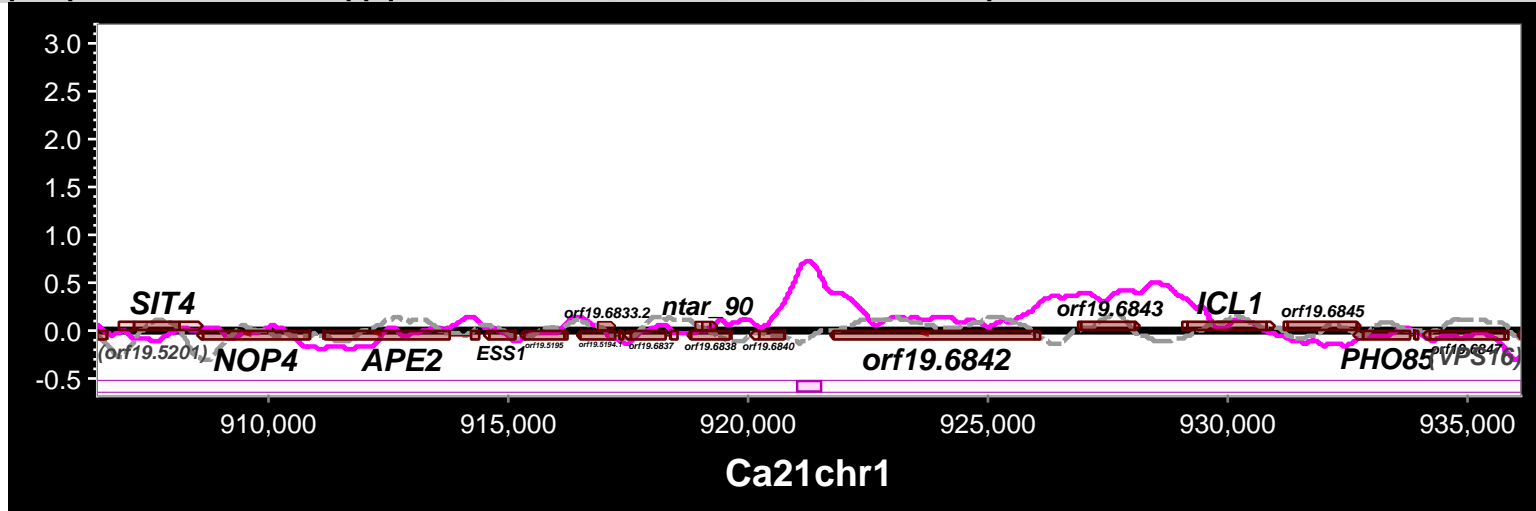

[0.717] Ca21chr5:481750-511433 [+] [PTH2, orf19.4230, orf19.4229, PTH1, orf19.4228]

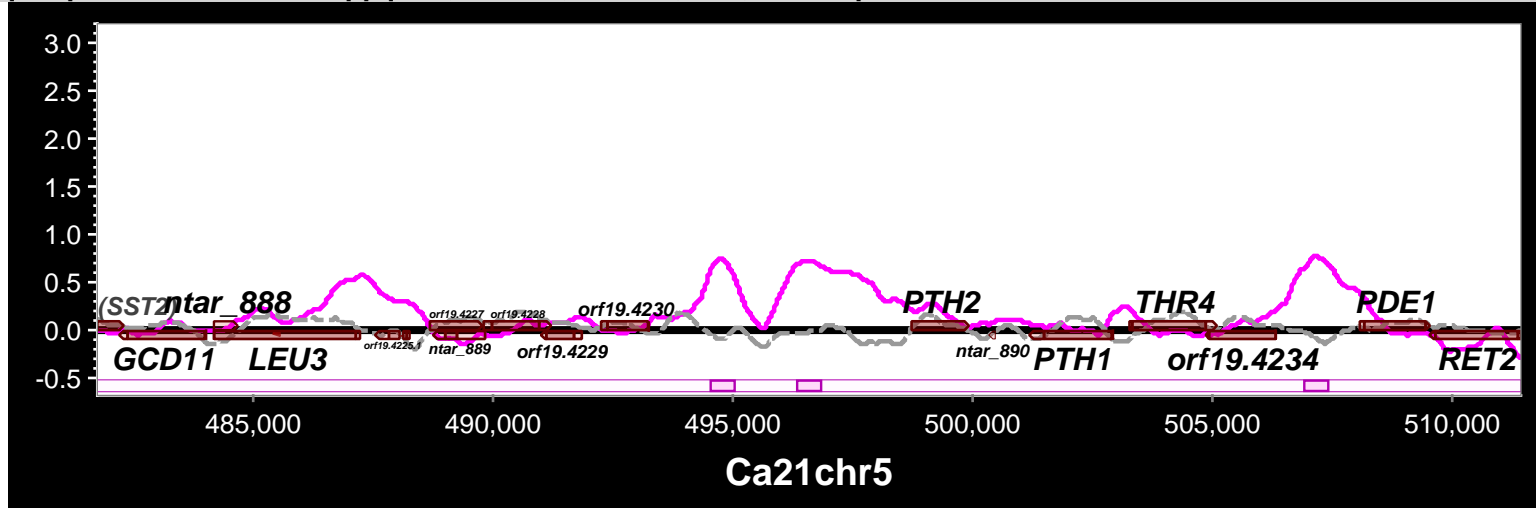

[0.716] Ca21chr5:365780-395463 [+] [CCN1, CCT7, orf19.3205, DAL52, orf19.3204]

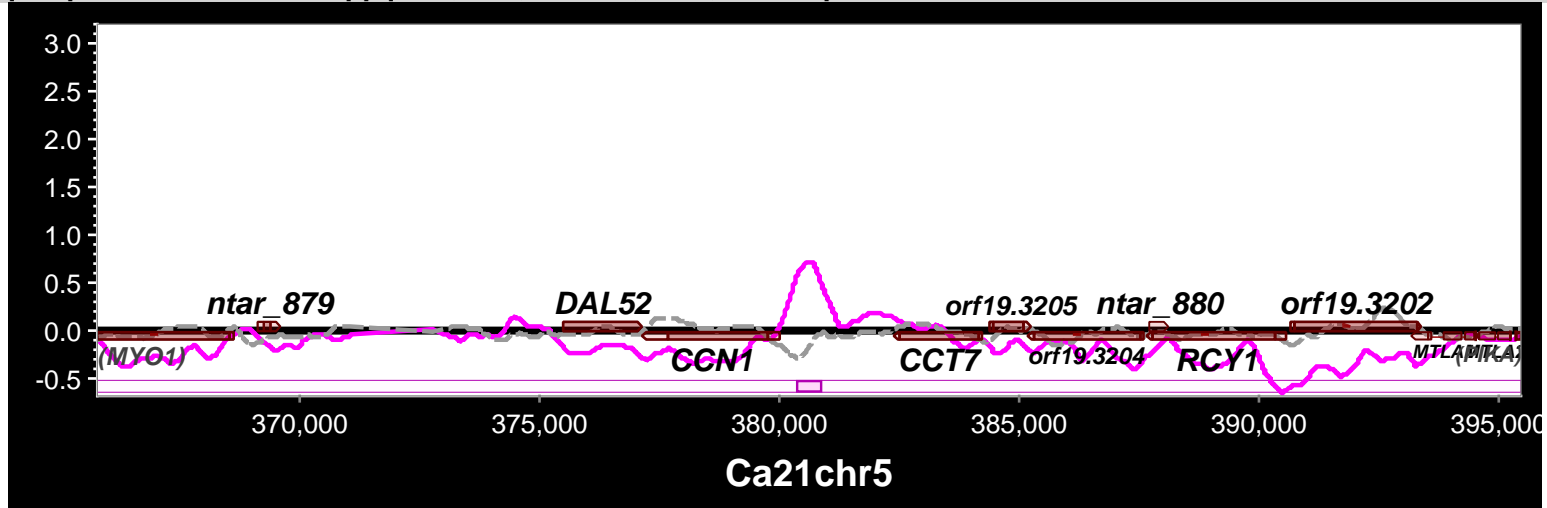

[0.715] Ca21chr4:548120-577803 [+] [orf19.2726, orf19.2725, GRX3, orf19.2728, orf19.2724]

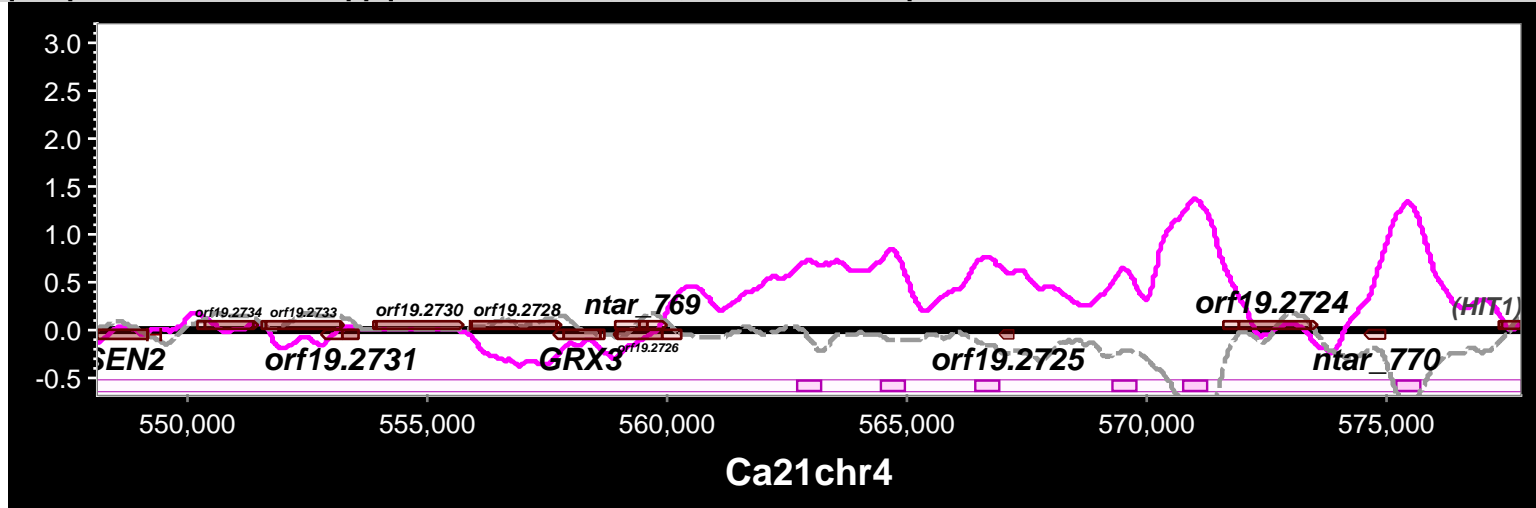

[0.715] Ca21chr4:766347-796030 [+] [tD(GUC)4, tG(GCC)2, tD(GUC)3, tD(GUC)2, SPO75]

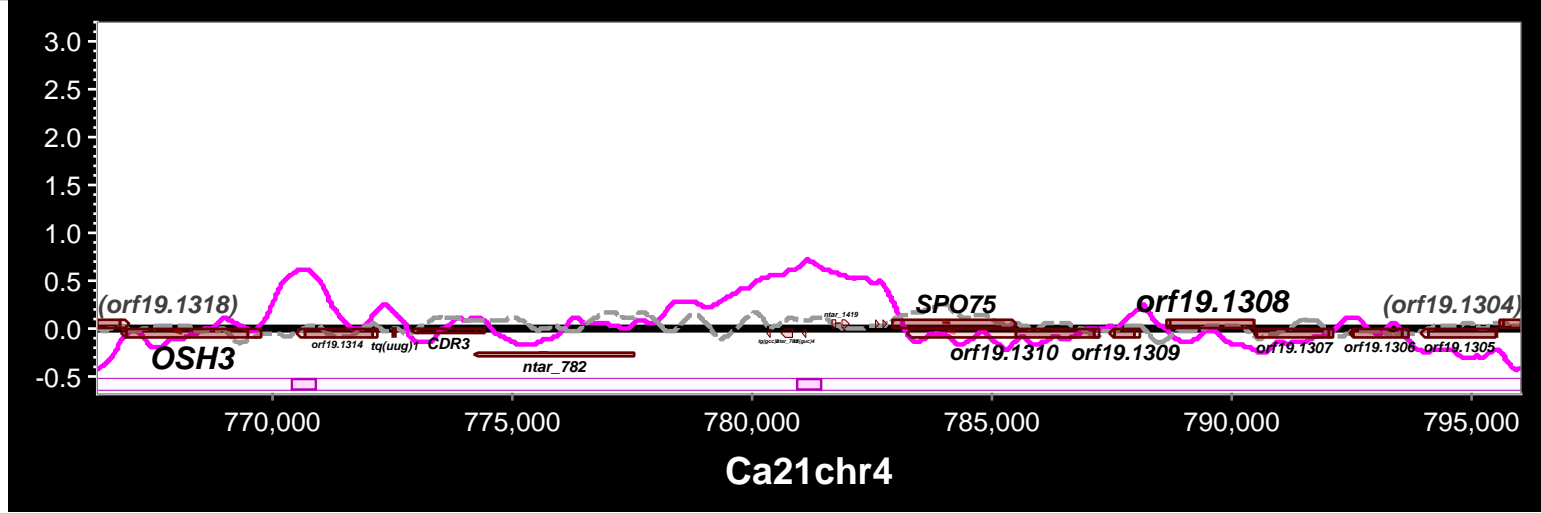

[0.714] Ca21chr2:507660-537343 [+] [orf19.1584, ZRT2, orf19.1582, FGR22, orf19.1581]

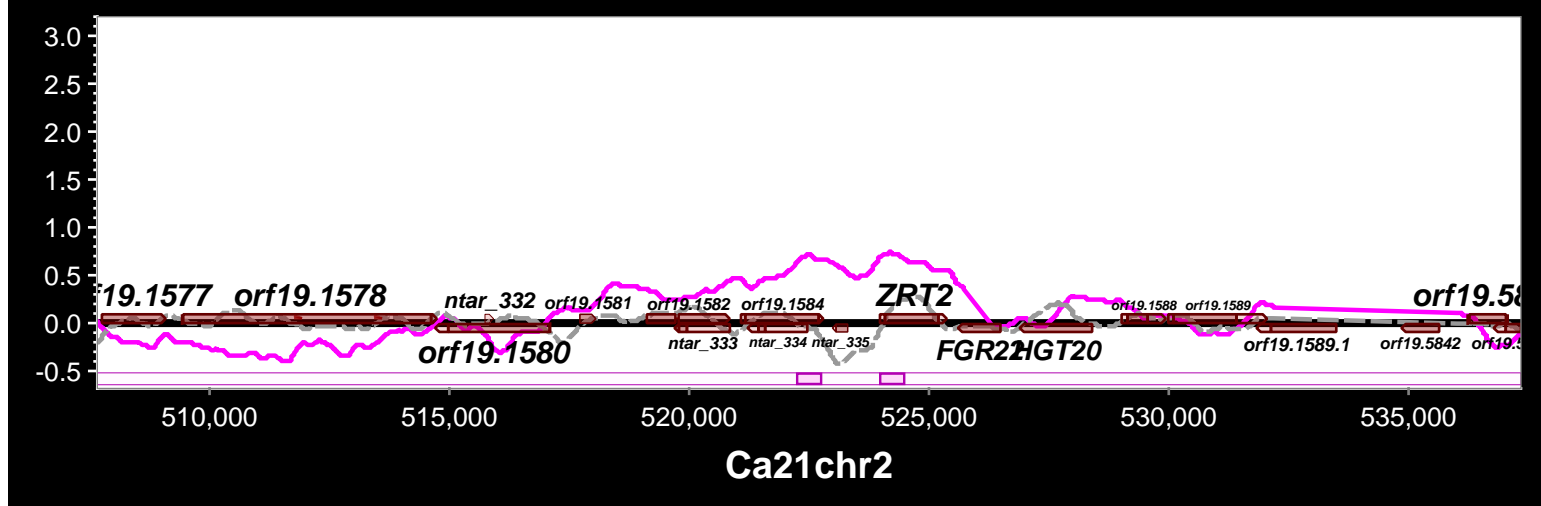

[0.714] Ca21chr4:201597-231280 [+] [HGT17, RAT1, orf19.4680, MLP1, RPL40B]

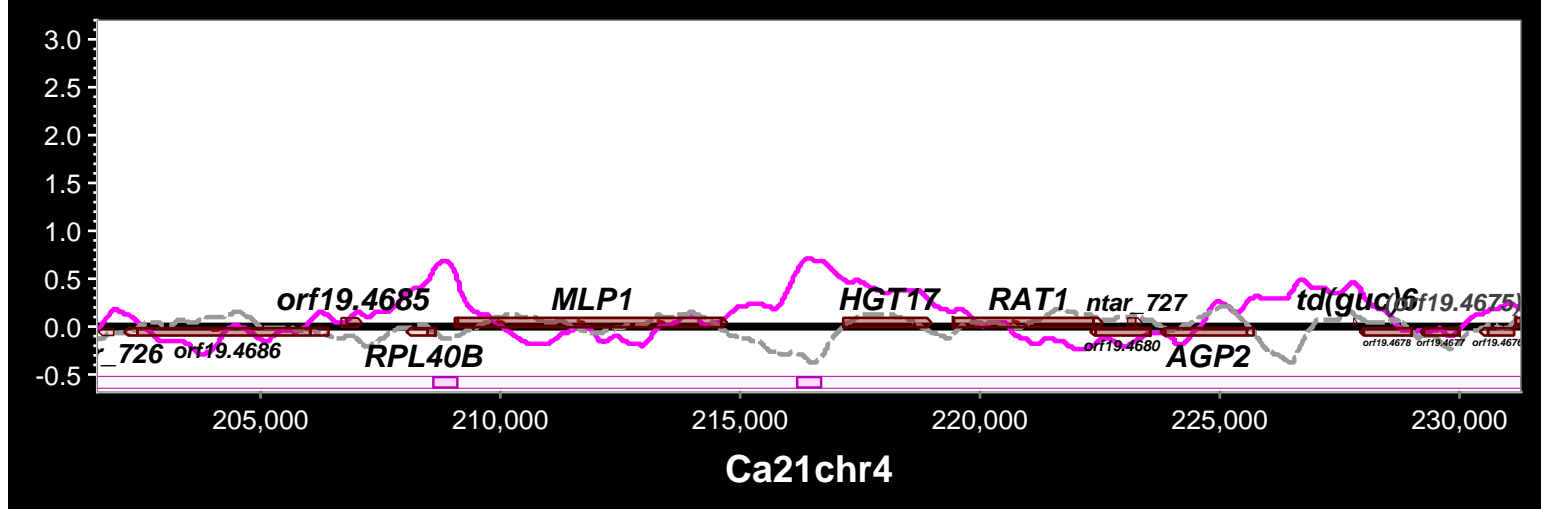

[0.71] Ca21chr3:1592093-1621776 [+] [SSN6, POS5, RPD31, orf19.6797, orf19.6802]

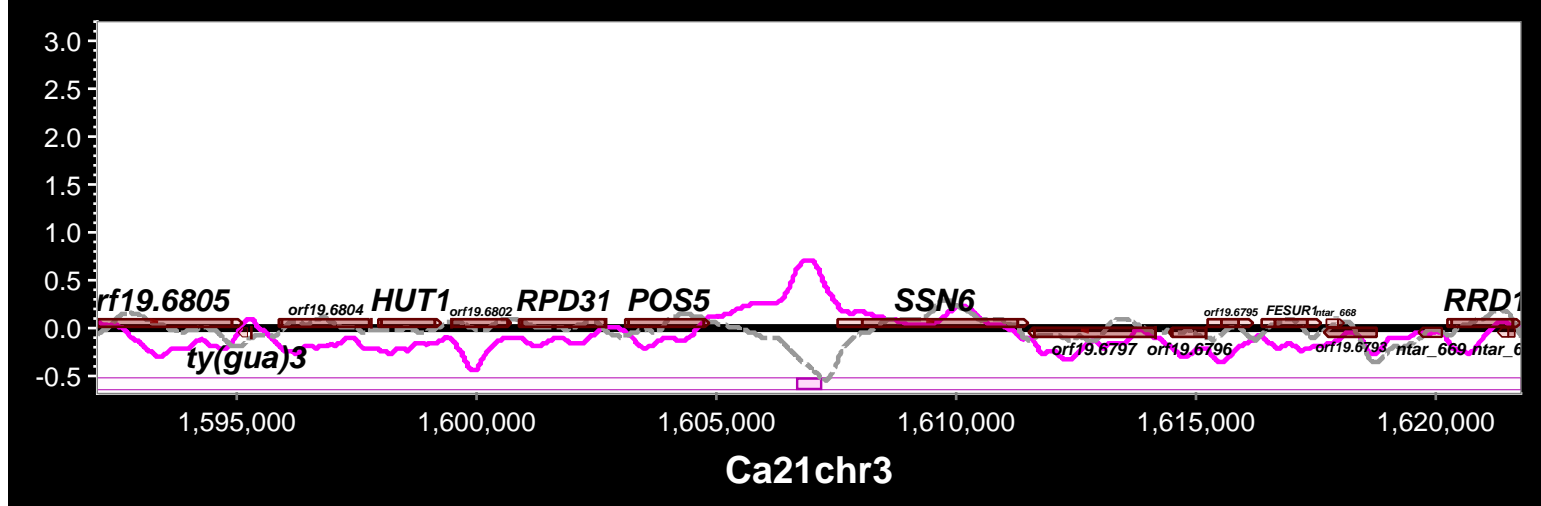



[0.709] Ca21chrR:1131858-1161541 [+] [orf19.5289, orf19.5288.1, IFE2, orf19.1012, orf19.1011]

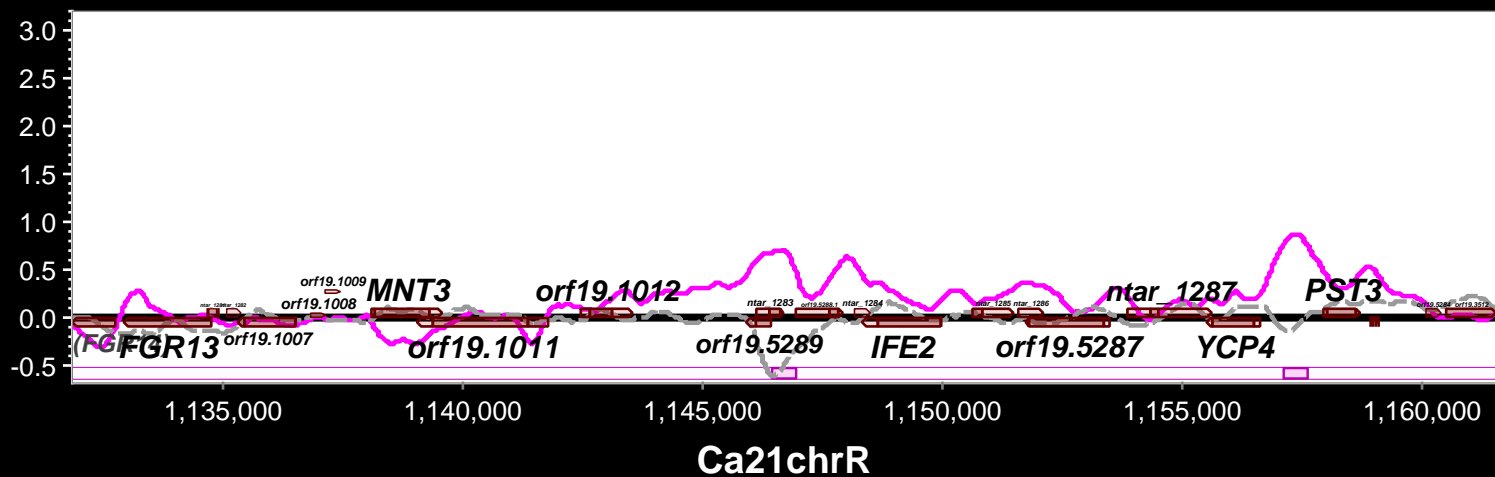

[0.708] Ca21chr5:336963-366646 [+] [CEF3, orf19.4153, SPO1, SPB4, orf19.6297]

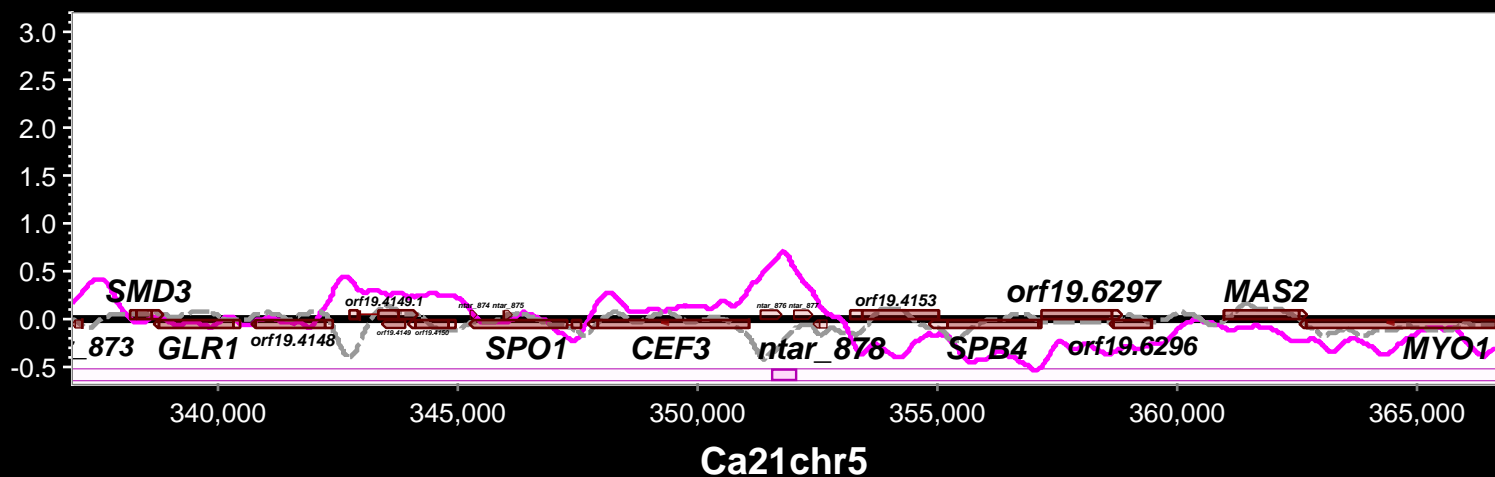

[0.707] Ca21chr1:557733-587416 [+] [orf19.2962, orf19.2963, orf19.2961, orf19.2964, FRS2]

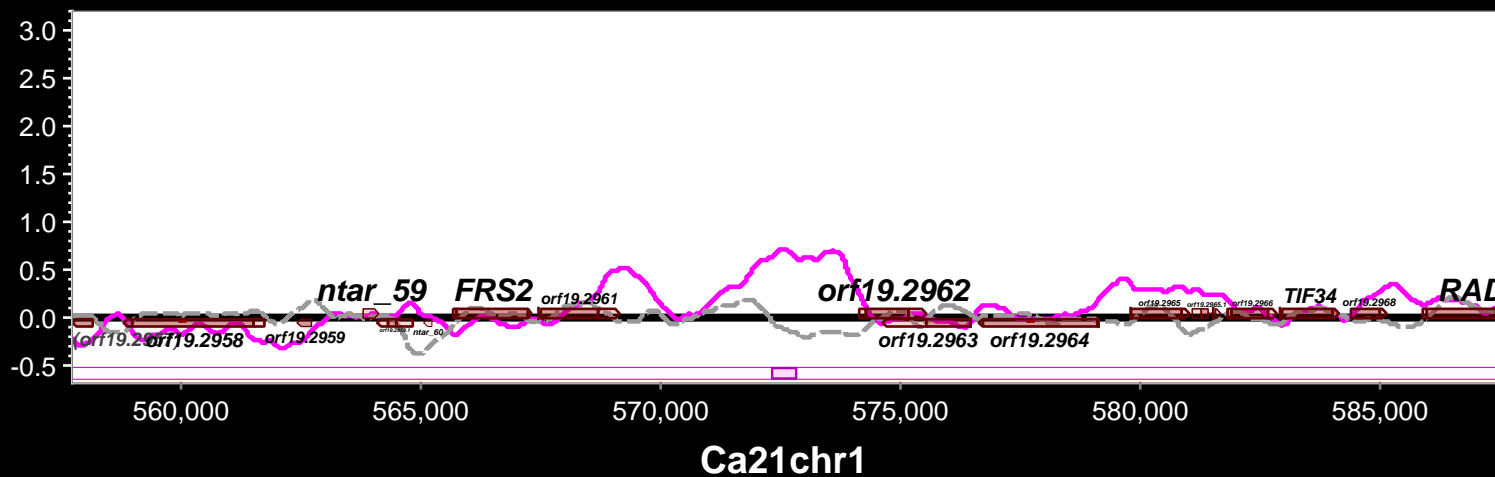

[0.707] Ca21chr2:459319-489002 [+] [orf19.1562, ECM3, POB3, HOM2, orf19.1564]

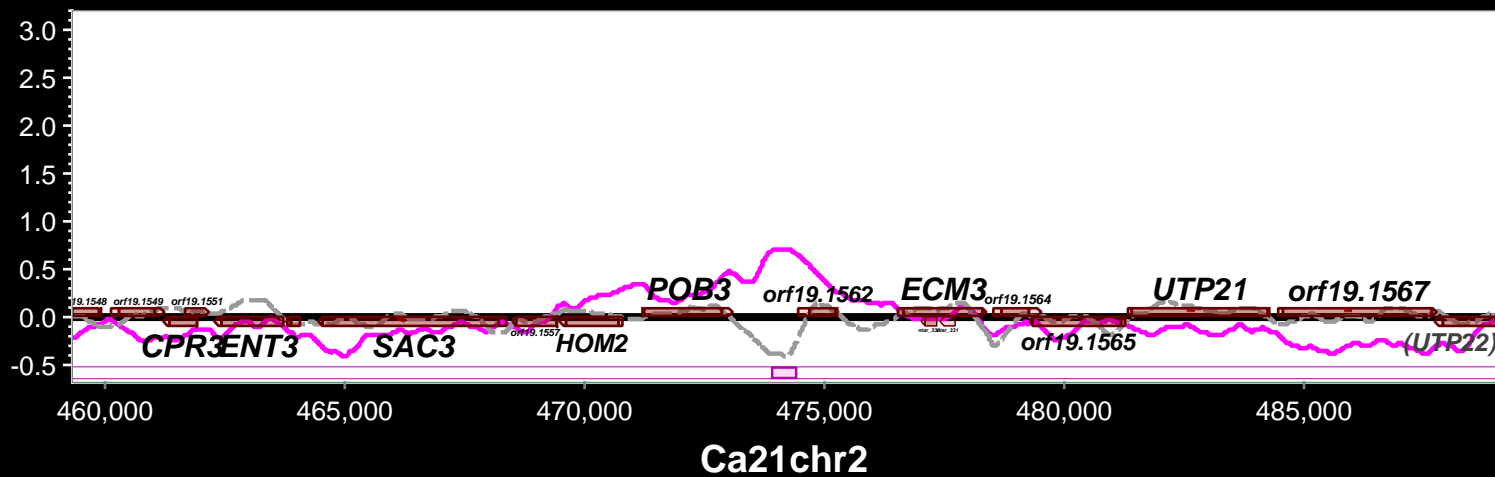

[0.705] Ca21chr1:432707-462390 [+] [GAL1, SHA3, orf19.3671, GAL10, orf19.3673]

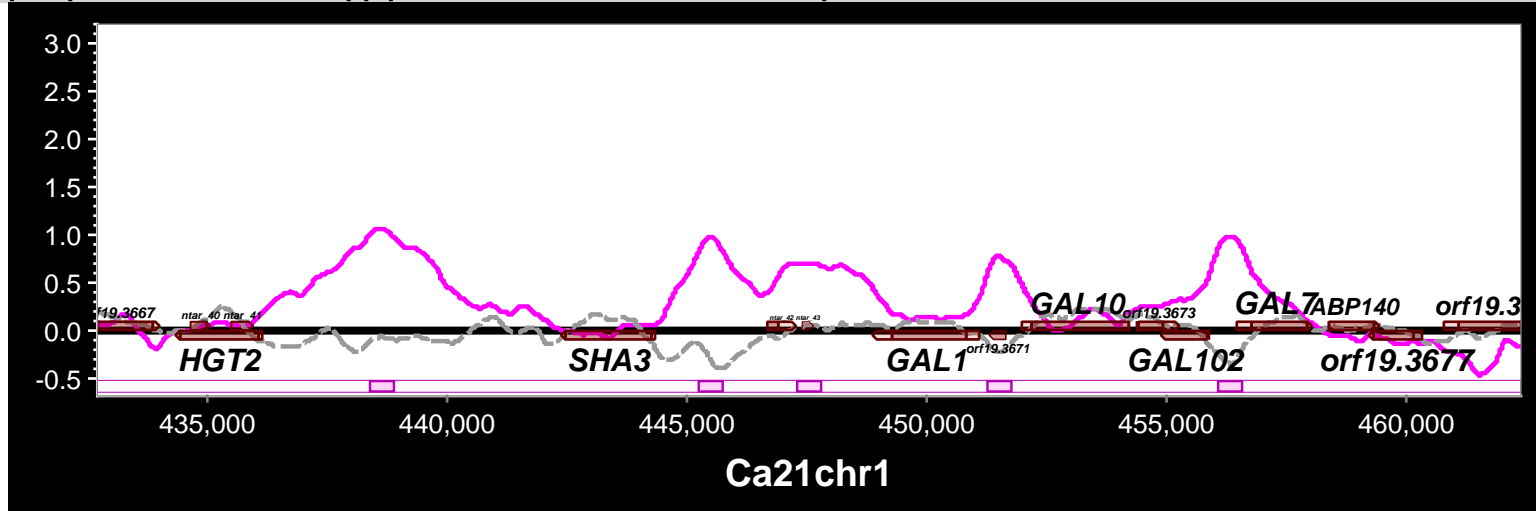

[0.705] Ca21chr2:1787567-1817250 [+] [PIR1, orf19.223, BUD20, orf19.225, orf19.217]

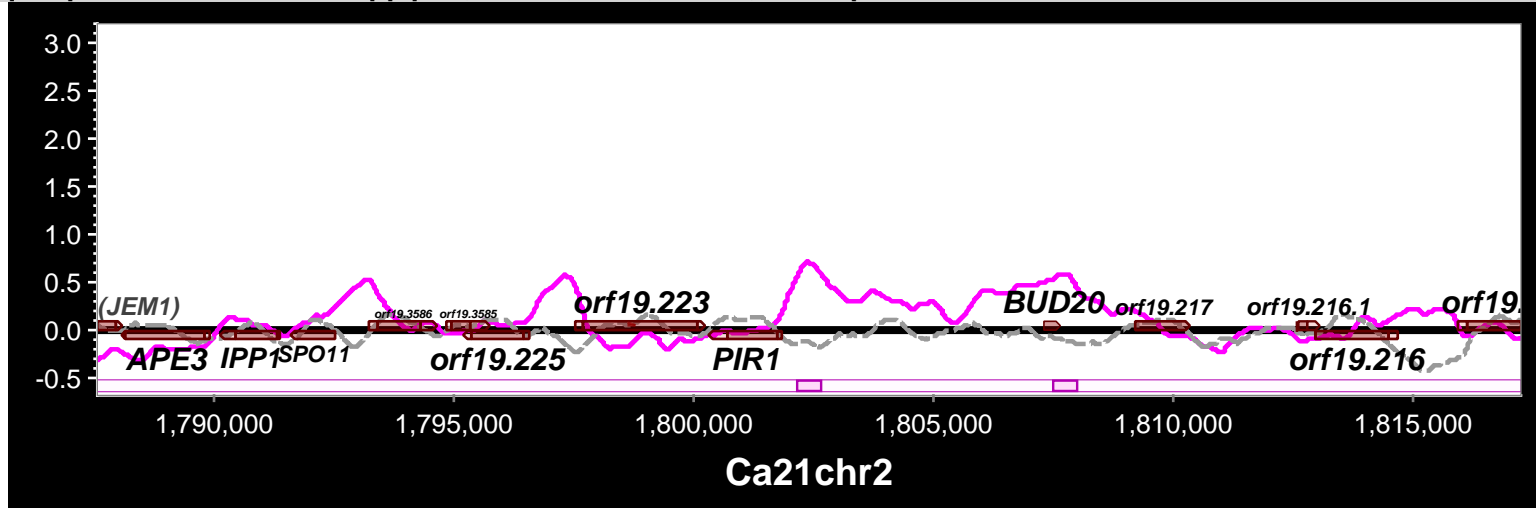

[0.705] Ca21chr6:193994-223677 [+] [CAN2, CIP1, orf19.114, orf19.109, orf19.107]

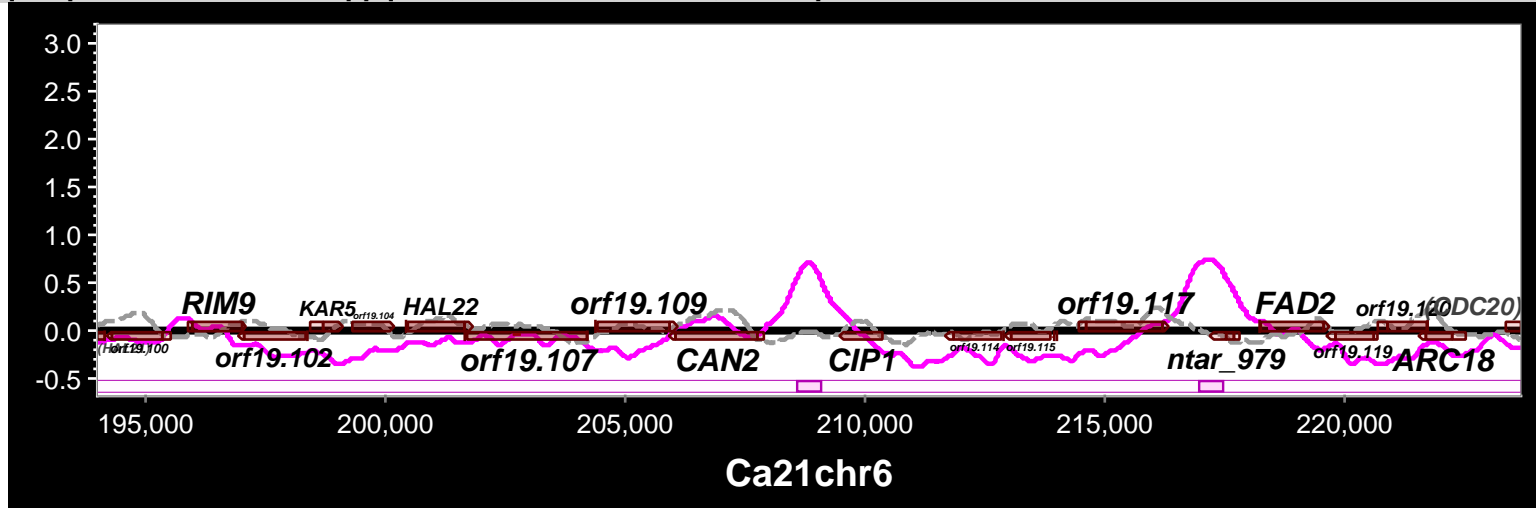

[0.704] Ca21chr3:666363-696046 [+] [t(KUU)1, orf19.320, orf19.321, orf19.319, orf19.318]

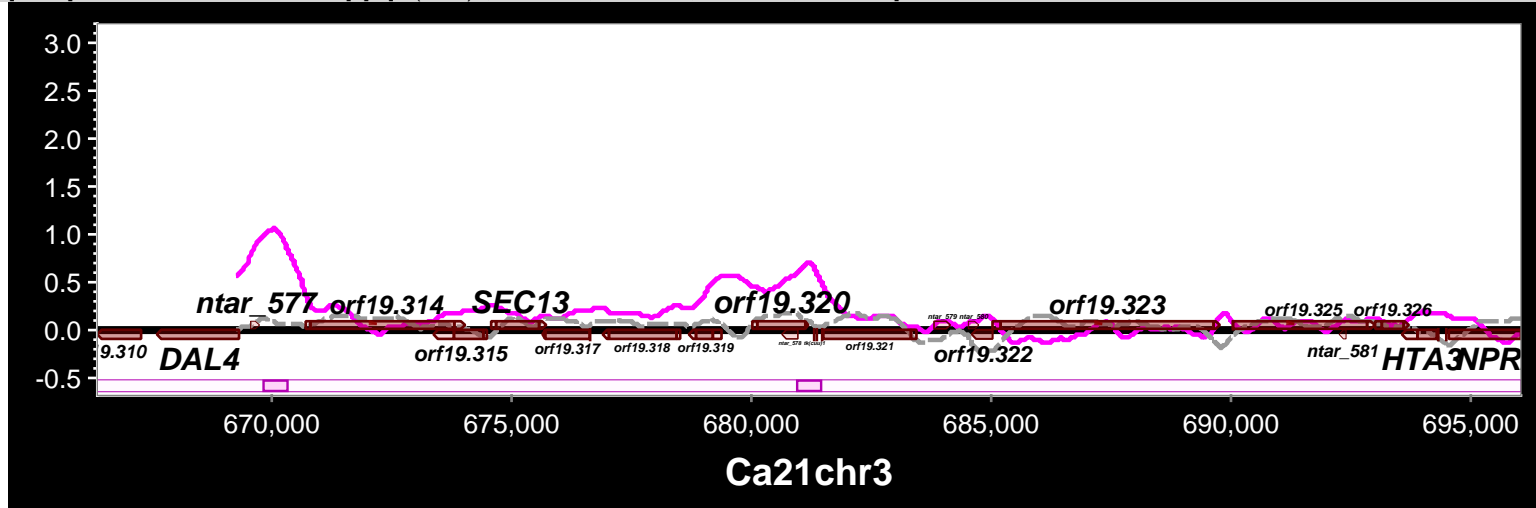

[0.703] Ca21chr2:646439-676122 [+] [STP4, FEN12, orf19.909.1, orf19.910, TOM1]

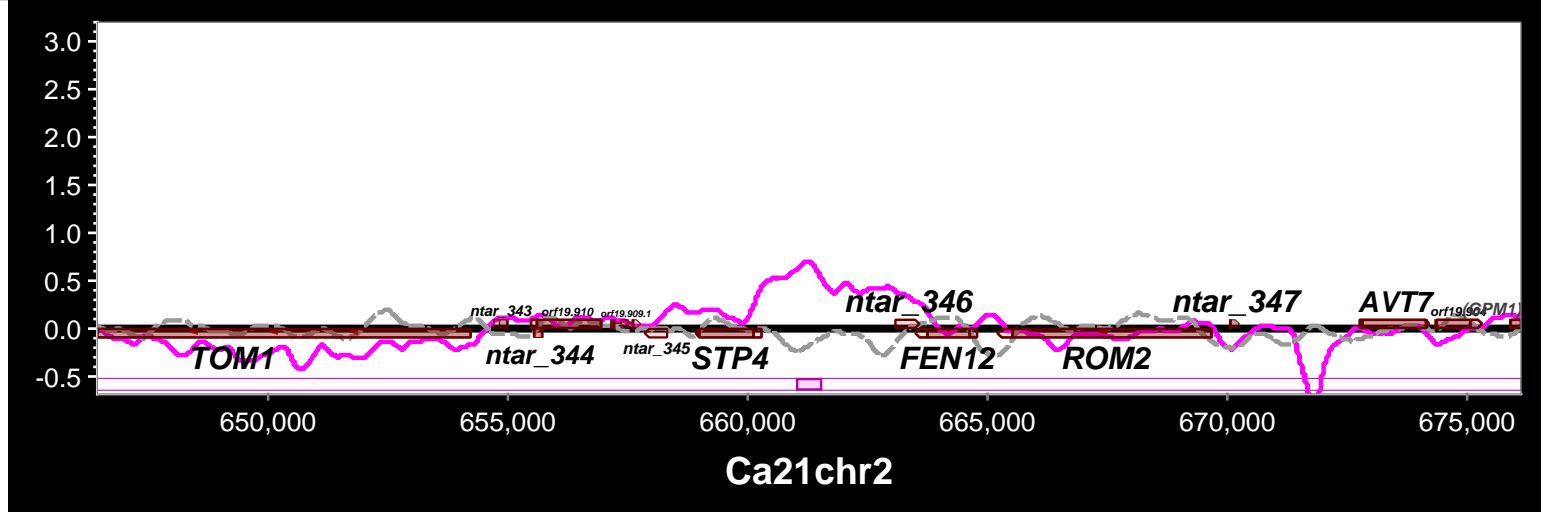

[0.695] Ca21chr1:253842-283525 [+] [orf19.3325, RPS21B, TRM2, TIF, orf19.3328]

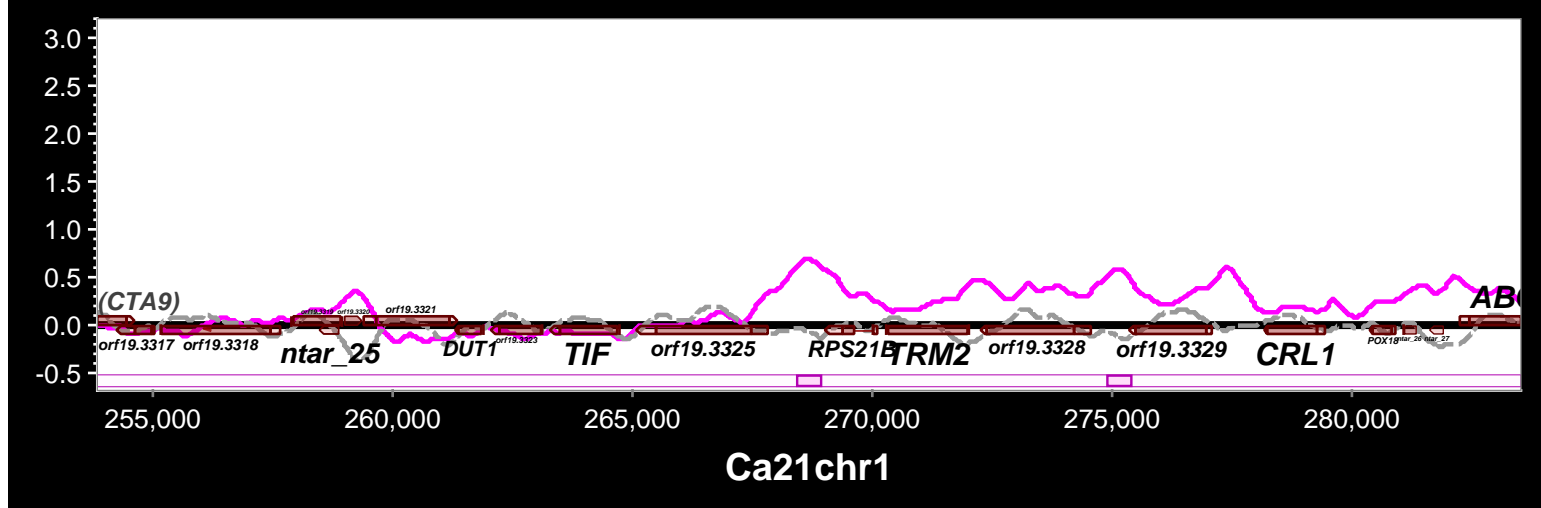

[0.695] Ca21chr5:219404-249087 [+] [orf19.1961, orf19.1963, orf19.1964, BUD23, orf19.1967]

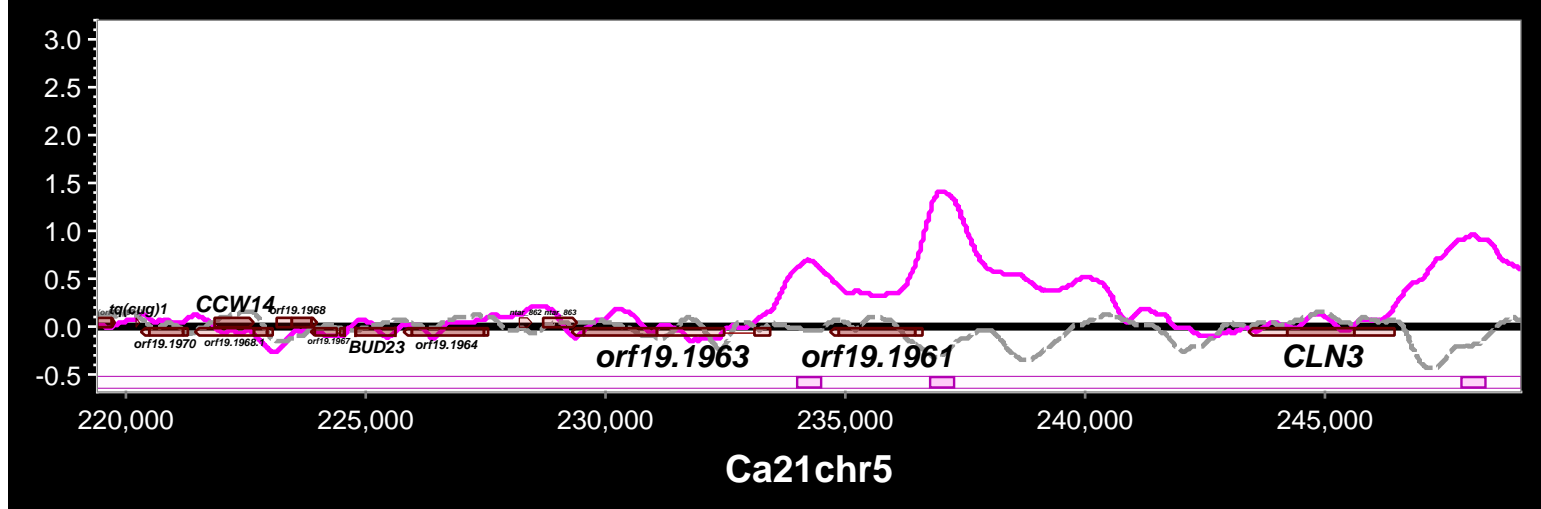

[0.694] Ca21chr3:1678094-1707777 [+] [orf19.6754, orf19.6755, orf19.6753, orf19.6756, orf19.6752]

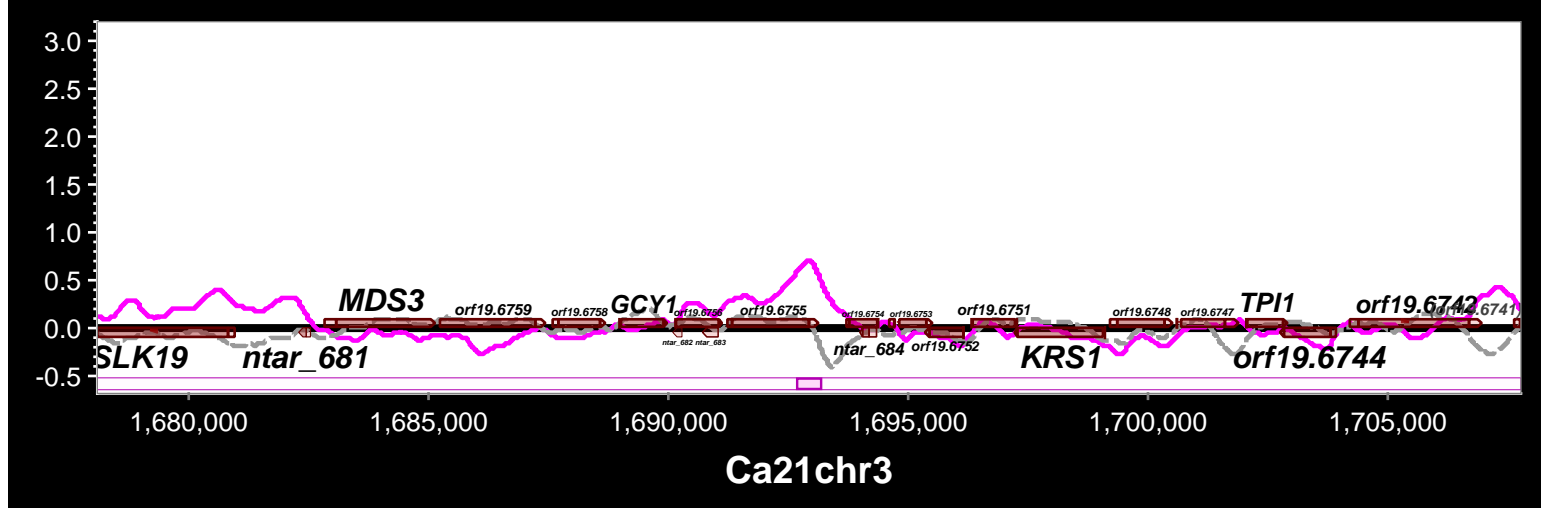

[0.694] Ca21chrR:647910-677593 [+] [orf19.2847.1, orf19.2848, orf19.2847, orf19.2846, AQY1]

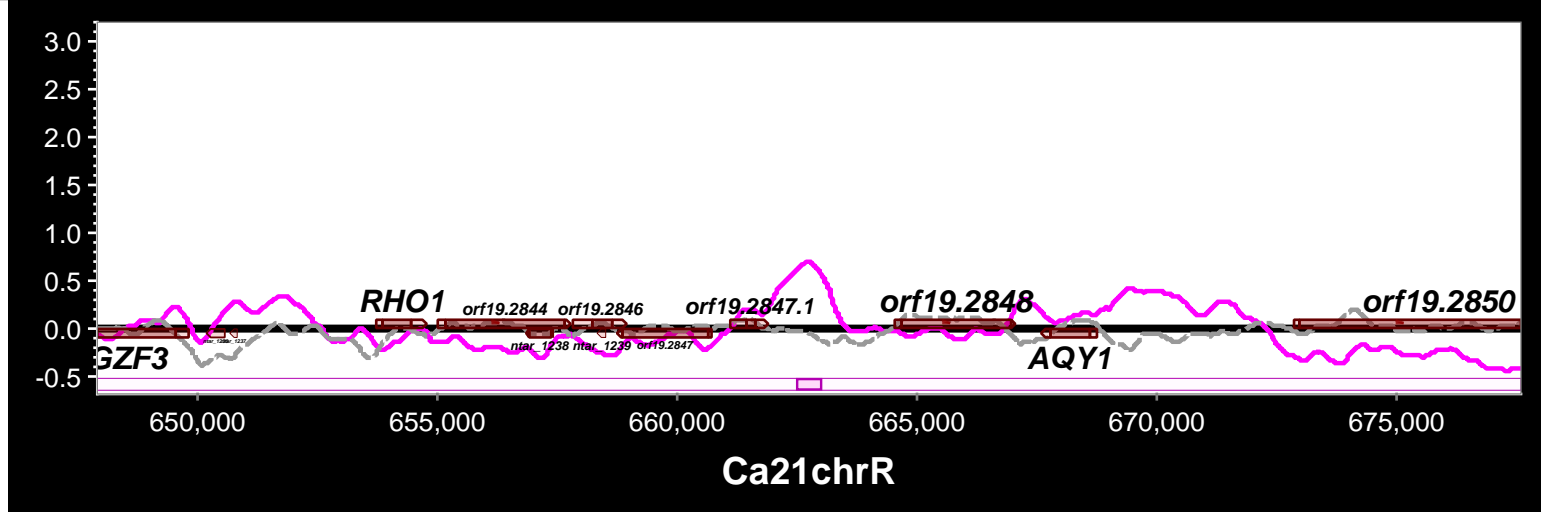

[0.693] Ca21chr1:2207006-2236689 [+] [orf19.4883, orf19.4882, orf19.4880, WOR1, NTF2]

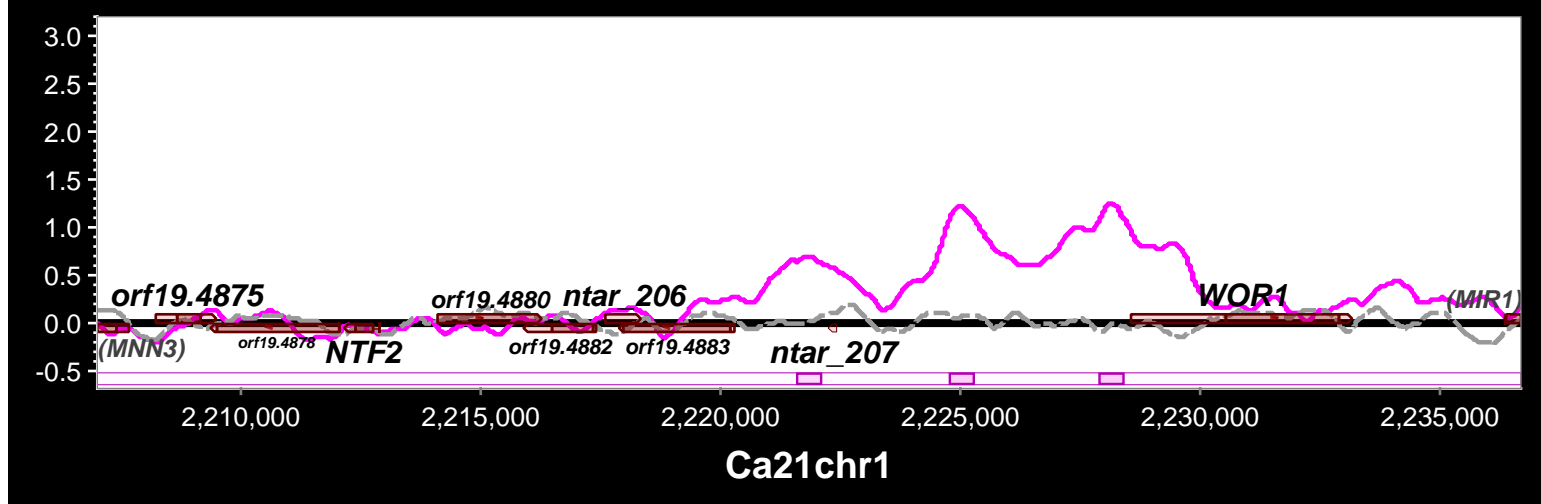

[0.688] Ca21chr5:190786-220469 [+] [GIT1, GIT2, GIT4, URA4, TRX2]

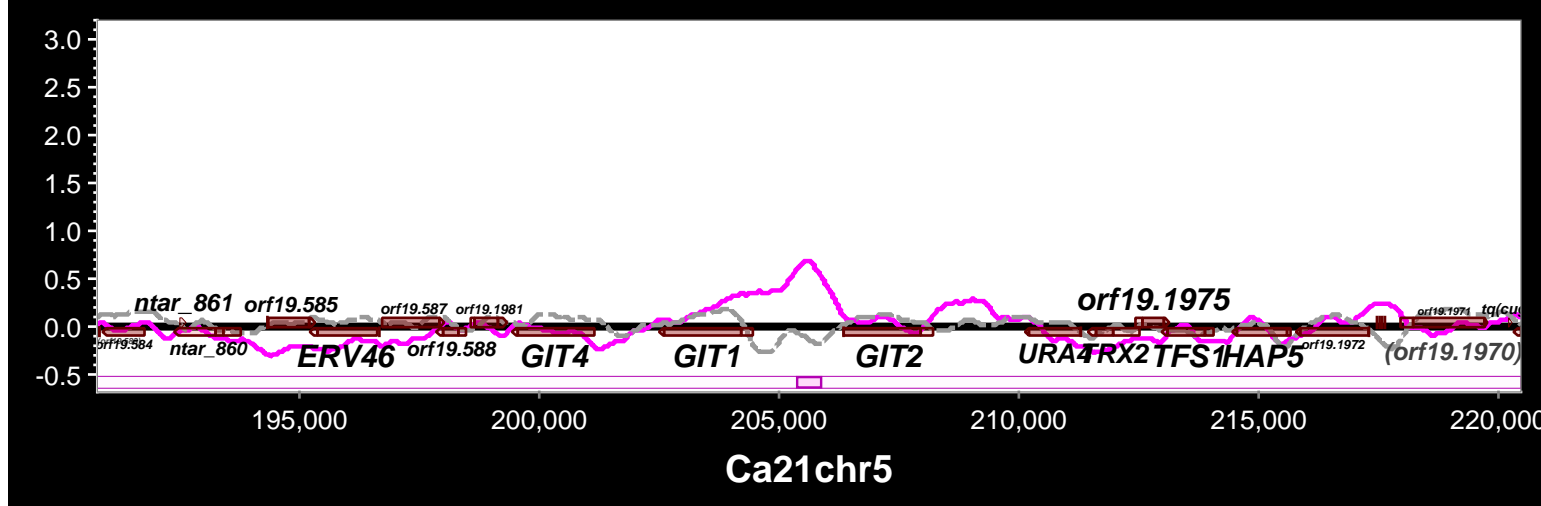

[0.684] Ca21chr2:186278-215961 [+] [HNM1, REG1, orf19.2002, orf19.2006, orf19.2001]

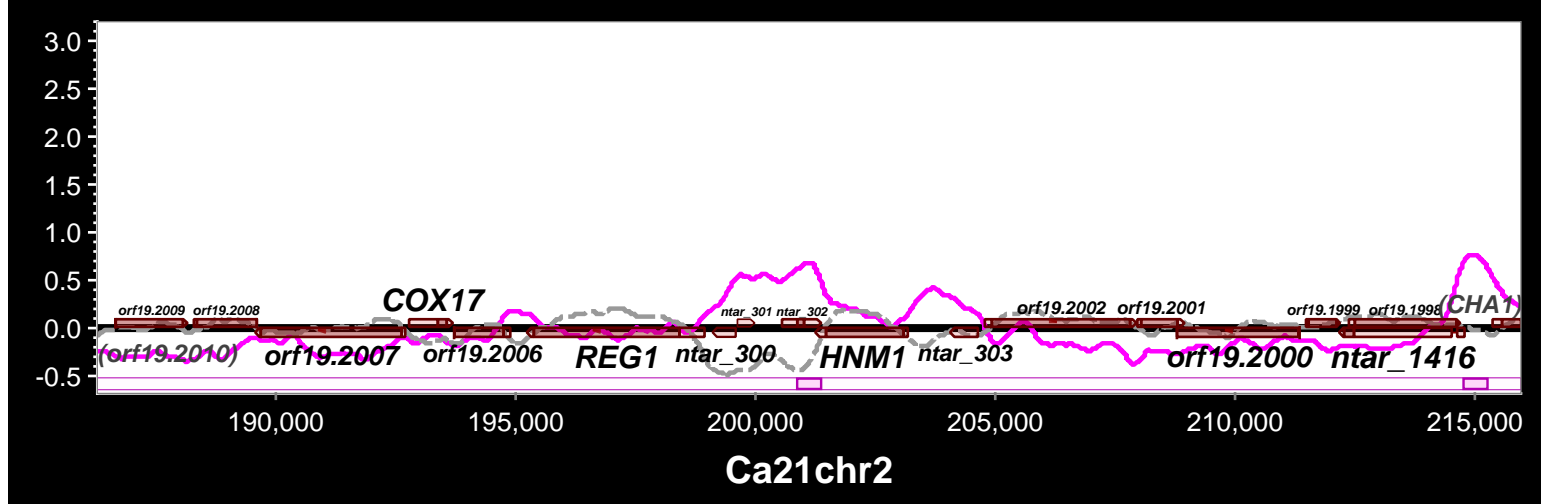

[0.684] Ca21chr3:718580-748263 [+] [orf19.344, BMT7, orf19.345, orf19.341, orf19.340]

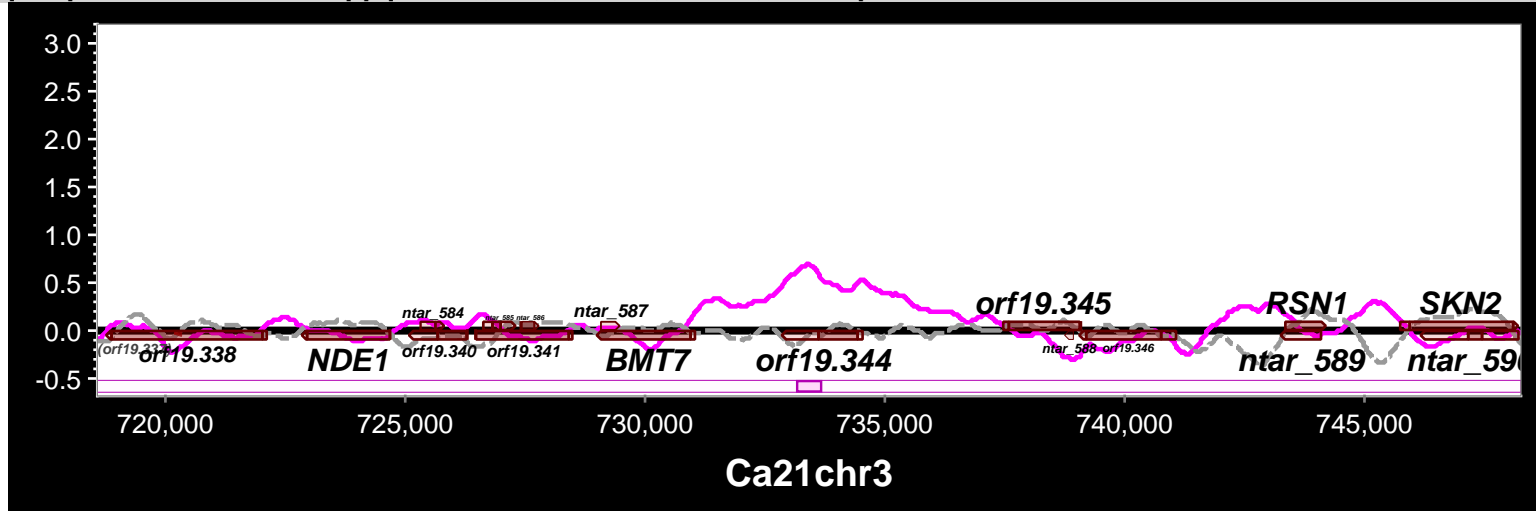

[0.684] Ca21chr4:194012-223695 [+] [RPL40B, MLP1, orf19.4685, orf19.4686, HGT17]

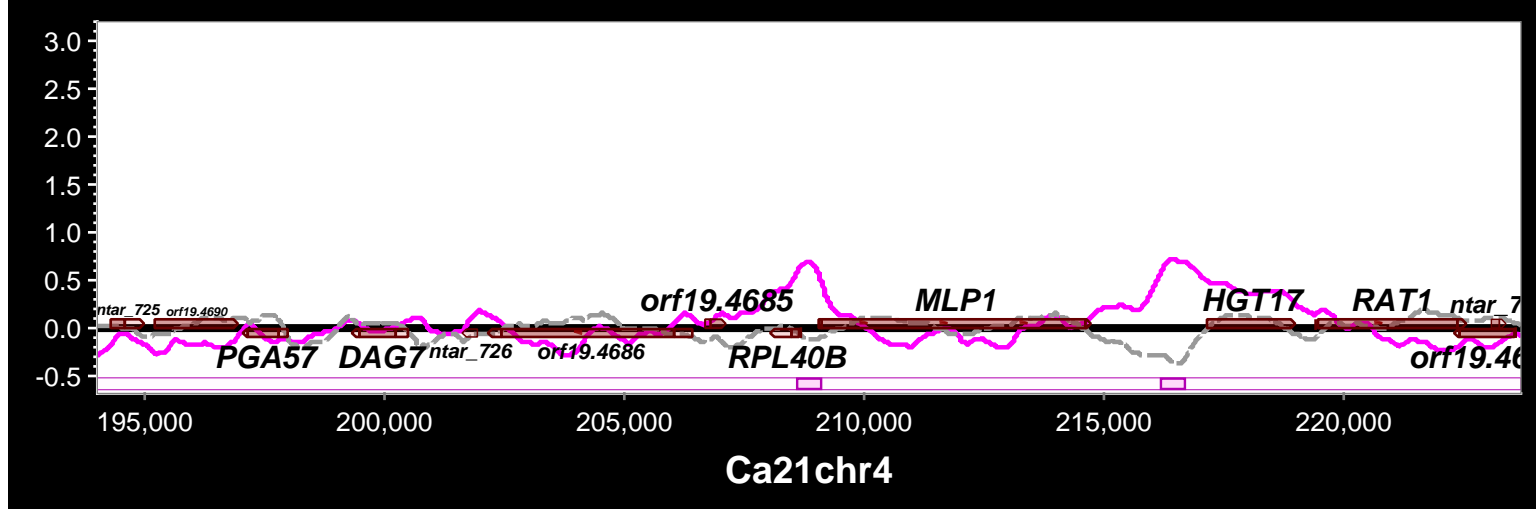

[0.684] Ca21chr5:680088-709771 [+] [orf19.4342, orf19.4341, orf19.4340.1, orf19.4340, VPS4]

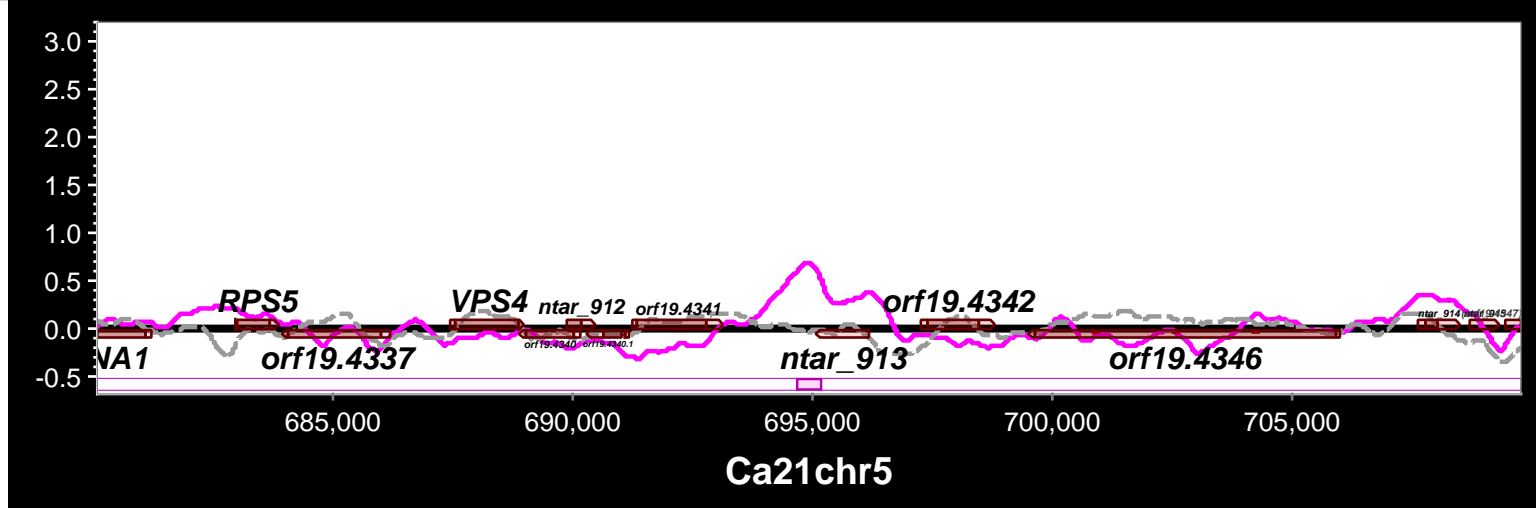

[0.683] Ca21chr1:2387961-2417644 [+] [orf19.2332, orf19.2333, ADA2, RPS17B, BIG1]

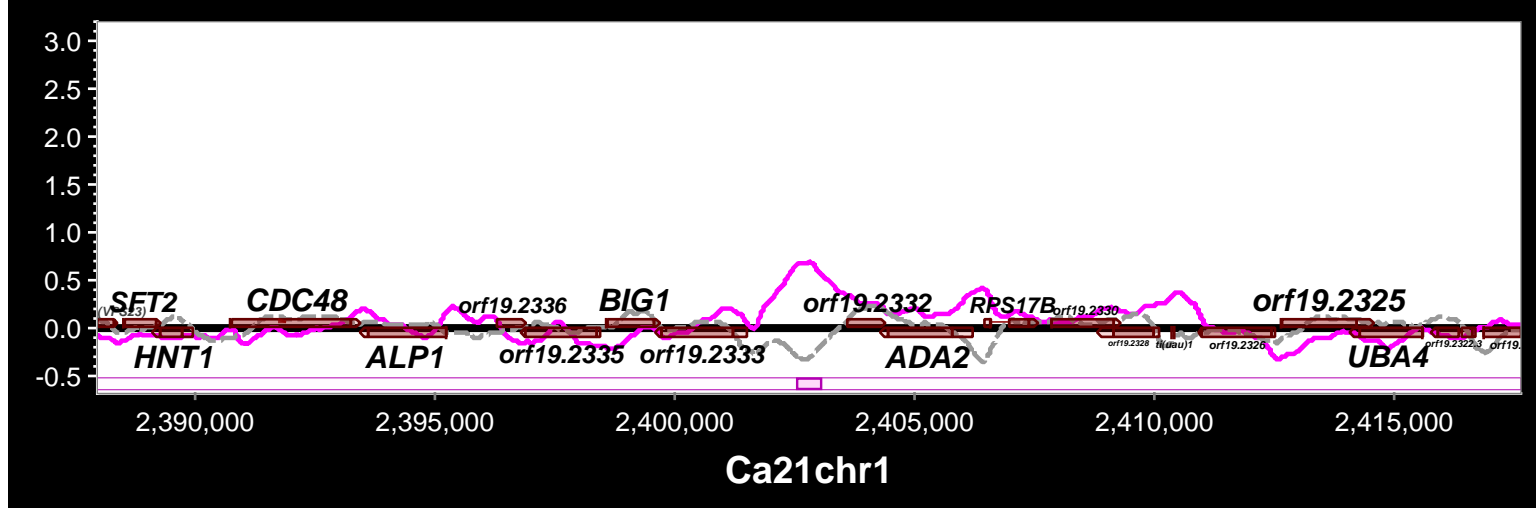

[0.68] Ca21chr2:1187325-1217008 [+] [orf19.5210, orf19.5209, IDP1, orf19.5212, orf19.5213]

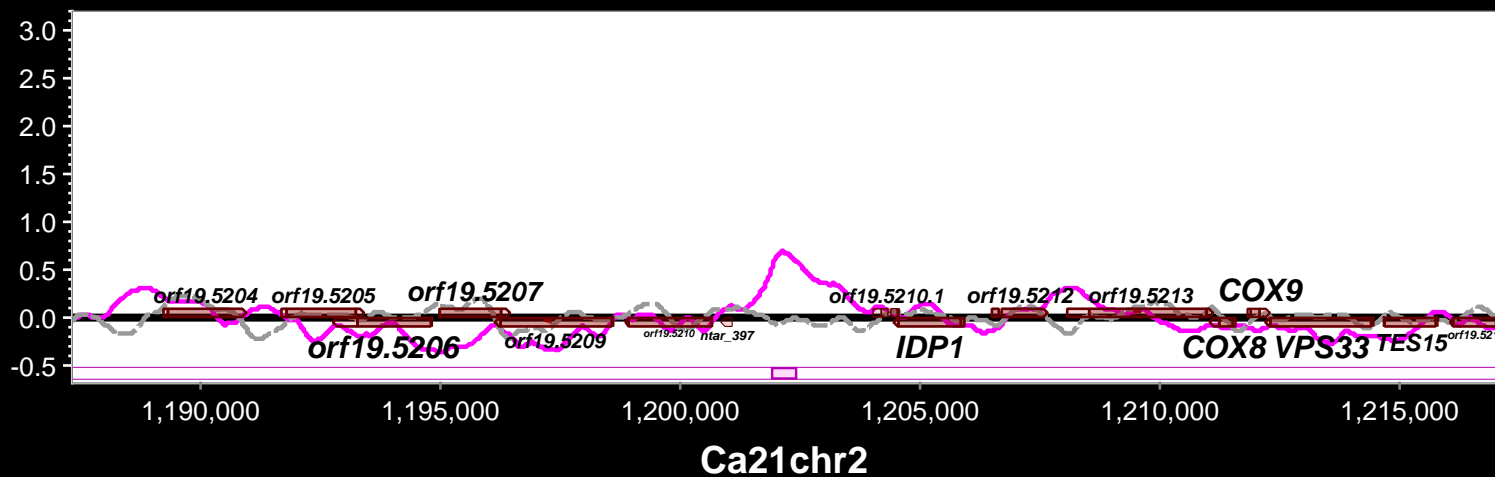

[0.677] Ca21chr7:687855-717538 [+] [orf19.5131, orf19.5132, orf19.5133, PDI1, orf19.5129]

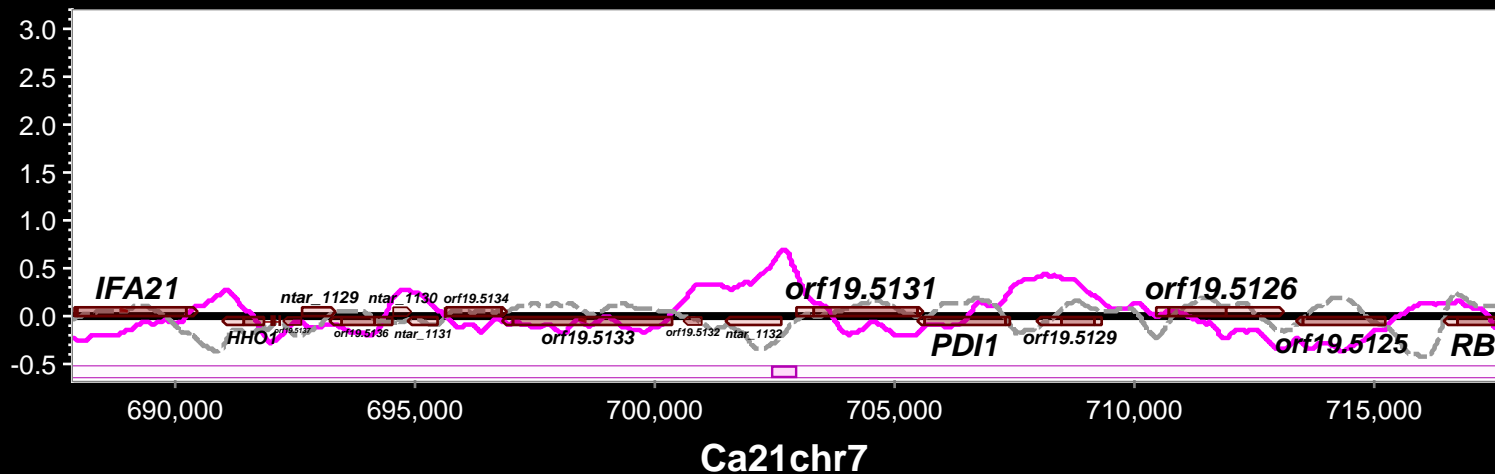

[0.674] Ca21chr7:454273-483956 [+] [orf19.6501, orf19.6502, orf19.6503, ECM42, orf19.6499]

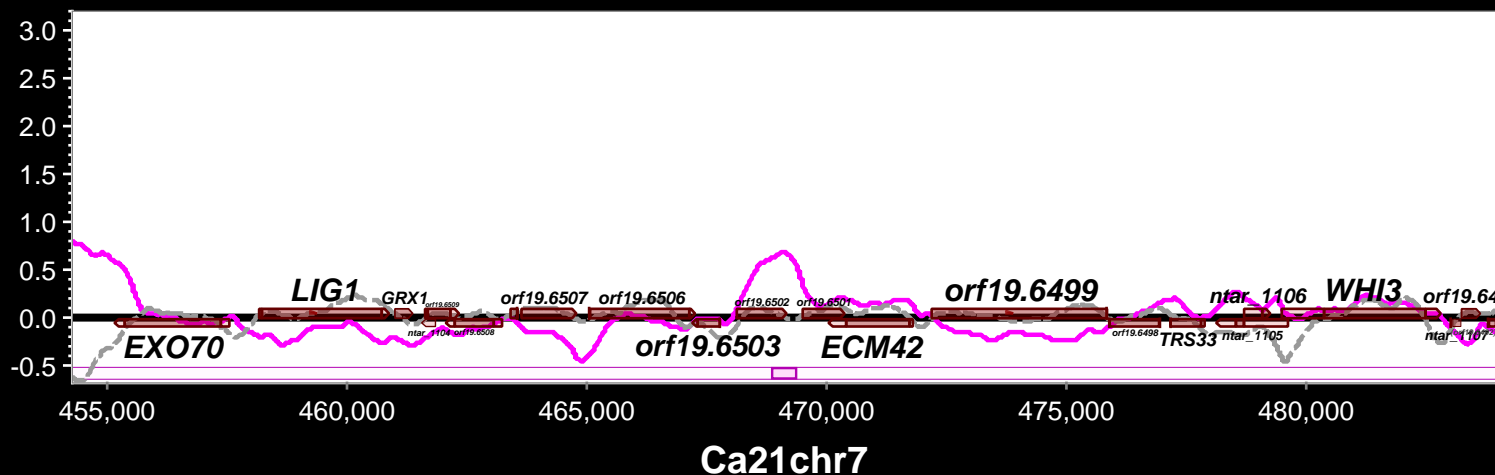

[0.674] Ca21chr7:708626-738309 [+] [RBR3, LIP8, orf19.5125, orf19.1344, orf19.1343]

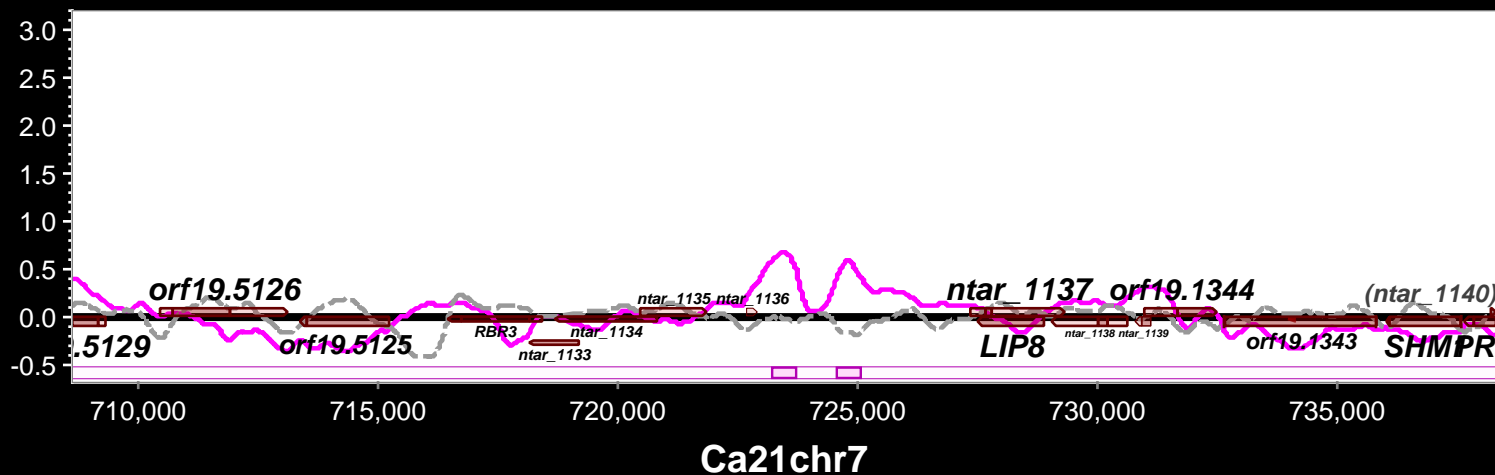

[0.673] Ca21chr2:114977-144660 [+] [orf19.2049, orf19.2050, orf19.2048, orf19.2047, orf19.2051]

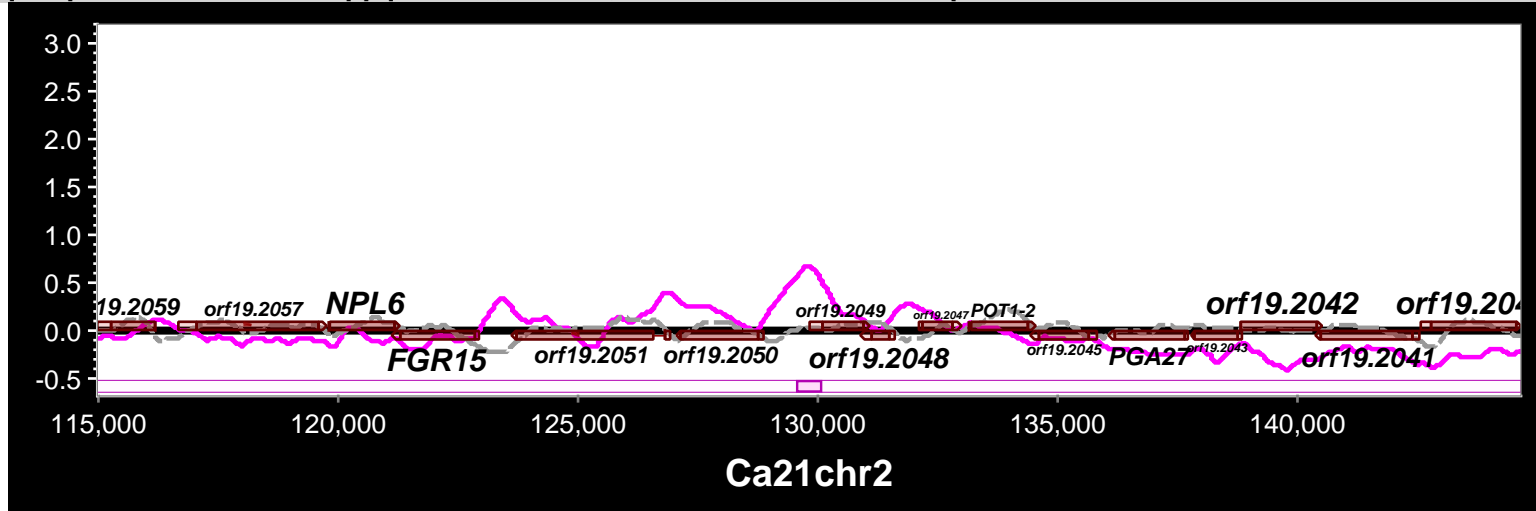

[0.673] Ca21chrR:764851-794534 [+] [orf19.4394, CIT1, orf19.4395, orf19.4396, DEM1]

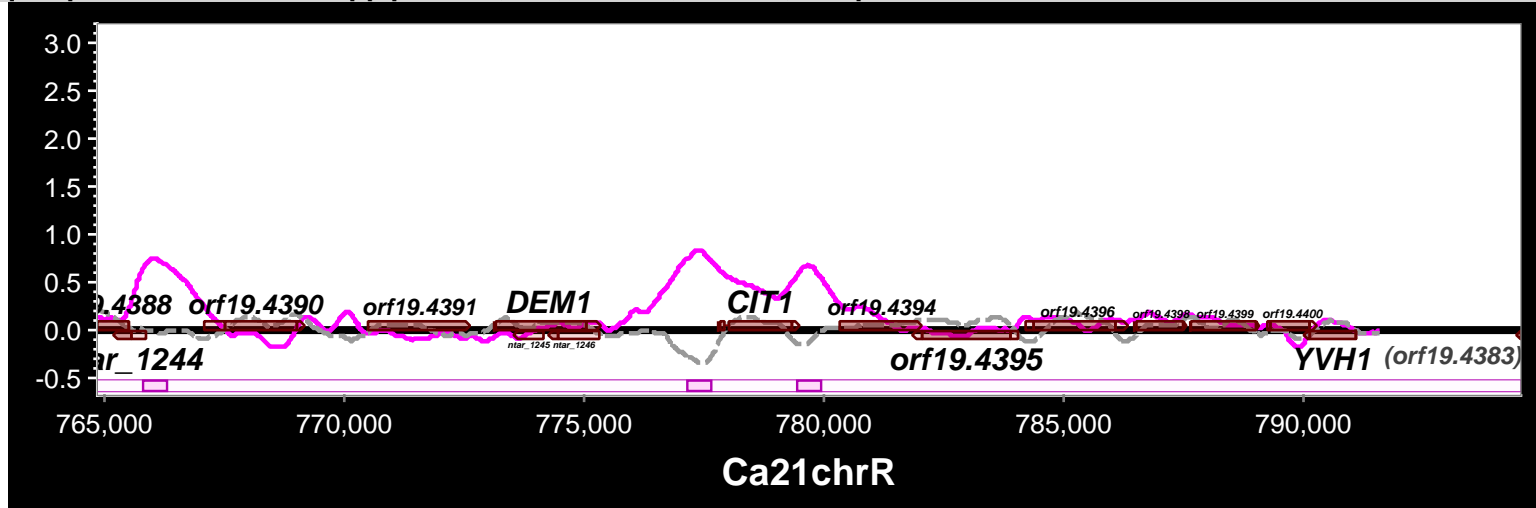

[0.665] Ca21chr2:1153697-1183380 [+] [orf19.6882.1, orf19.6883, OSM1, orf19.6884, YTH1]

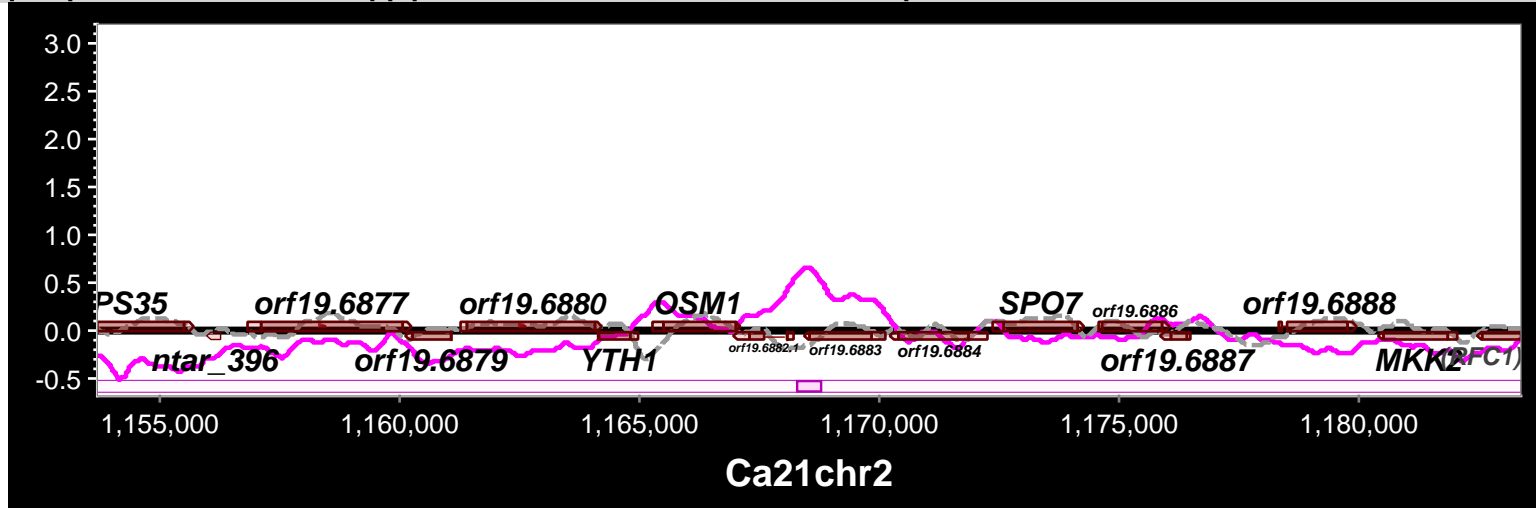

[0.664] Ca21chr1:801677-831360 [+] [orf19.4459, orf19.4461, BNI4, orf19.4463, SEN15]

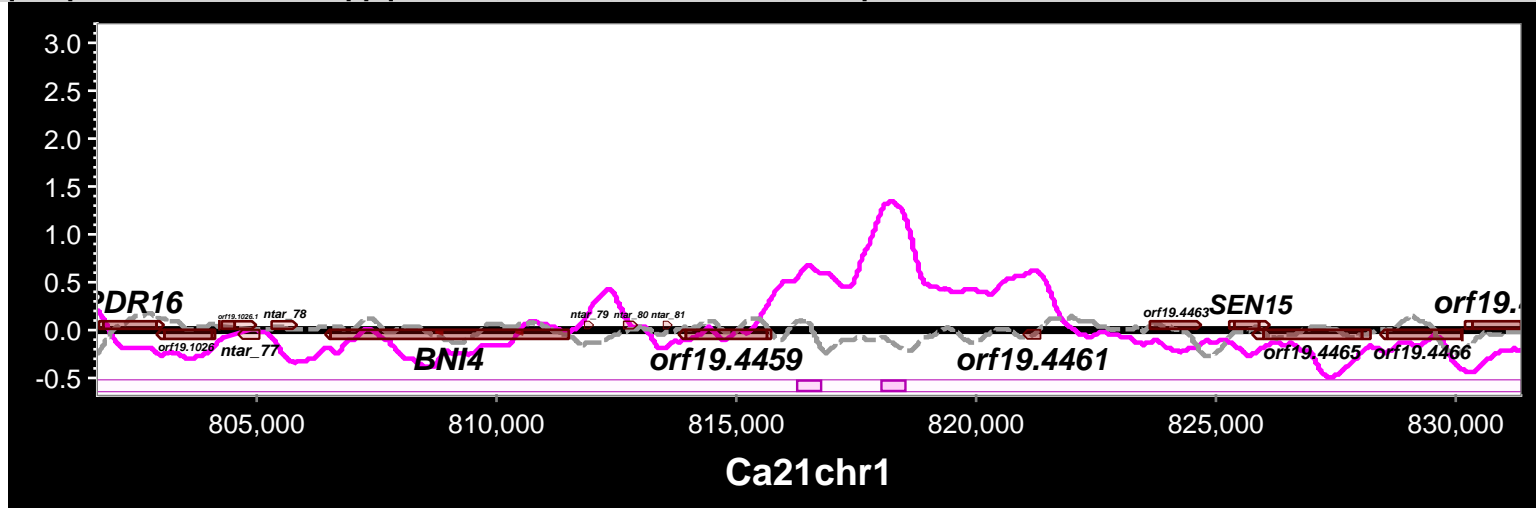

[0.663] Ca21chr1:2333521-2363204 [+] [orf19.1831, FCY23, orf19.1830, orf19.1833, orf19.1005]

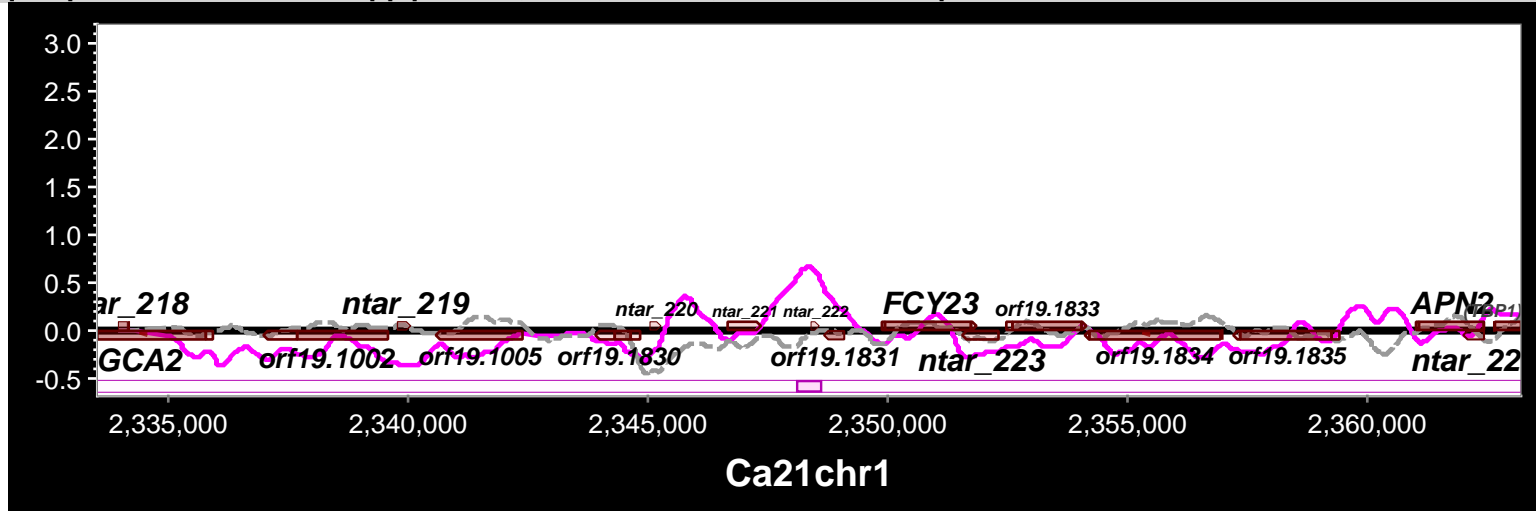

[0.662] Ca21chr1:2909550-2939233 [+] [COX19, orf19.4966, KEM1, orf19.4965, orf19.4964]

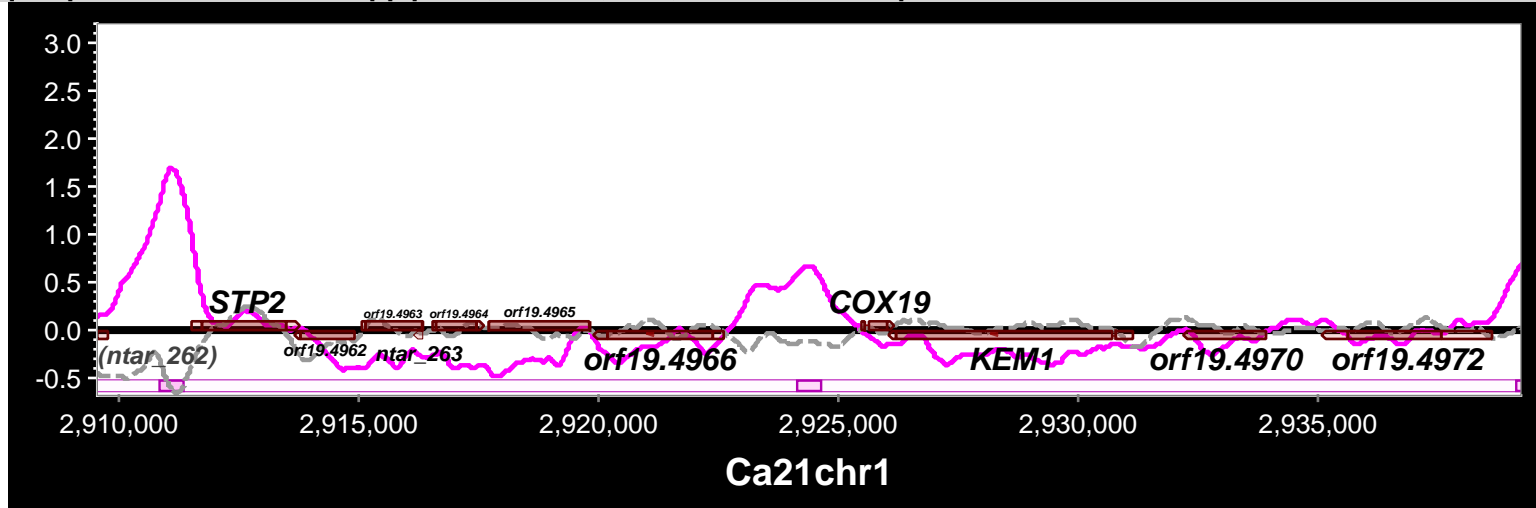

[0.662] Ca21chr3:1703290-1732973 [+] [orf19.6737, tF(GAA)5, tR(UCU)5, SNR52, orf19.6736]

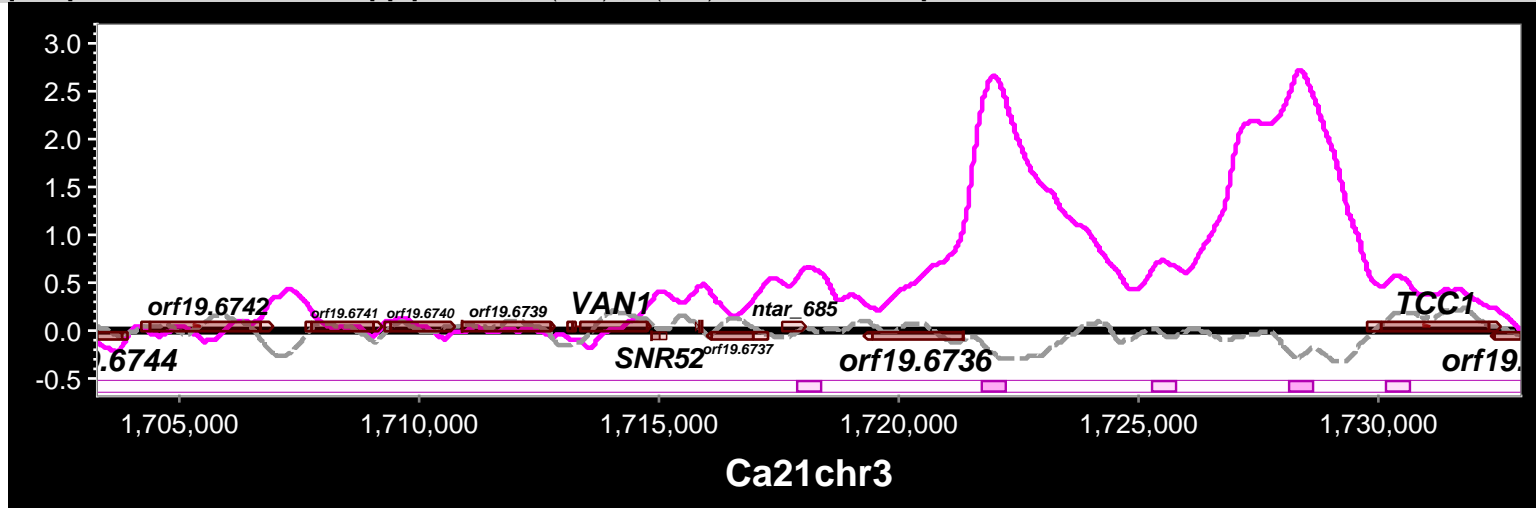

[0.662] Ca21chr7:43216-72899 [+] [orf19.7085, orf19.7084, orf19.7086, DCC1, orf19.7082]

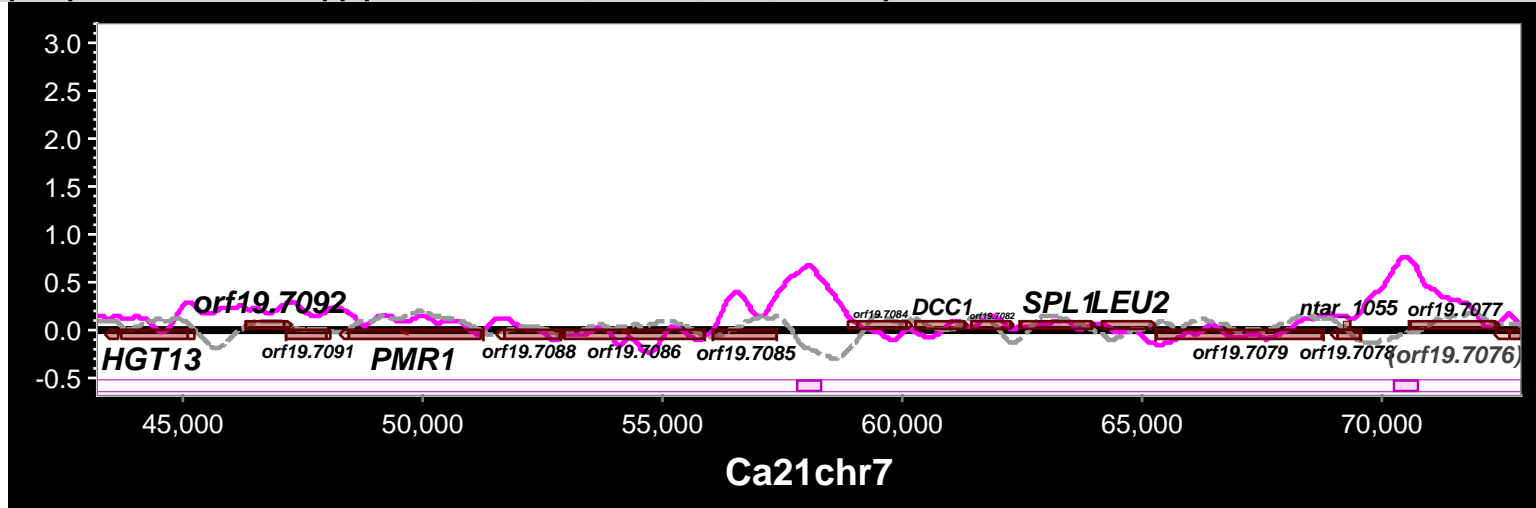



[0.657] Ca21chr1:2774046-2803729 [+] [orf19.6343, orf19.6342, orf19.6341, RBK1, orf19.6340]

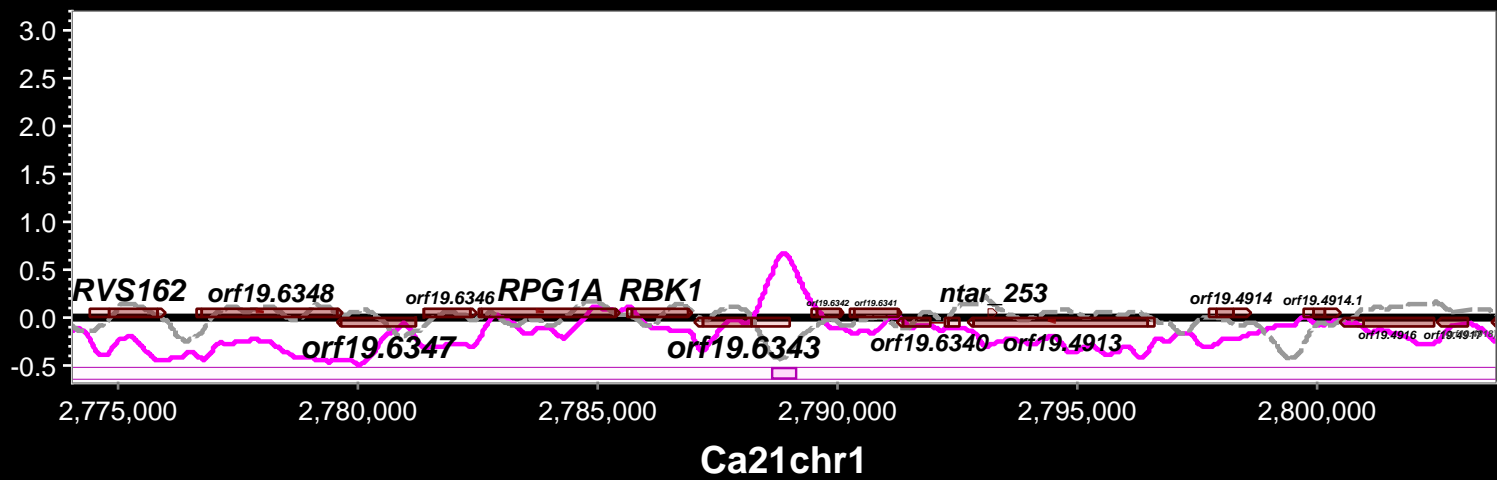

[0.656] Ca21chr1:1820368-1850051 [+] [OLE1, orf19.5114.1, orf19.5114, SDS24, ADH2]

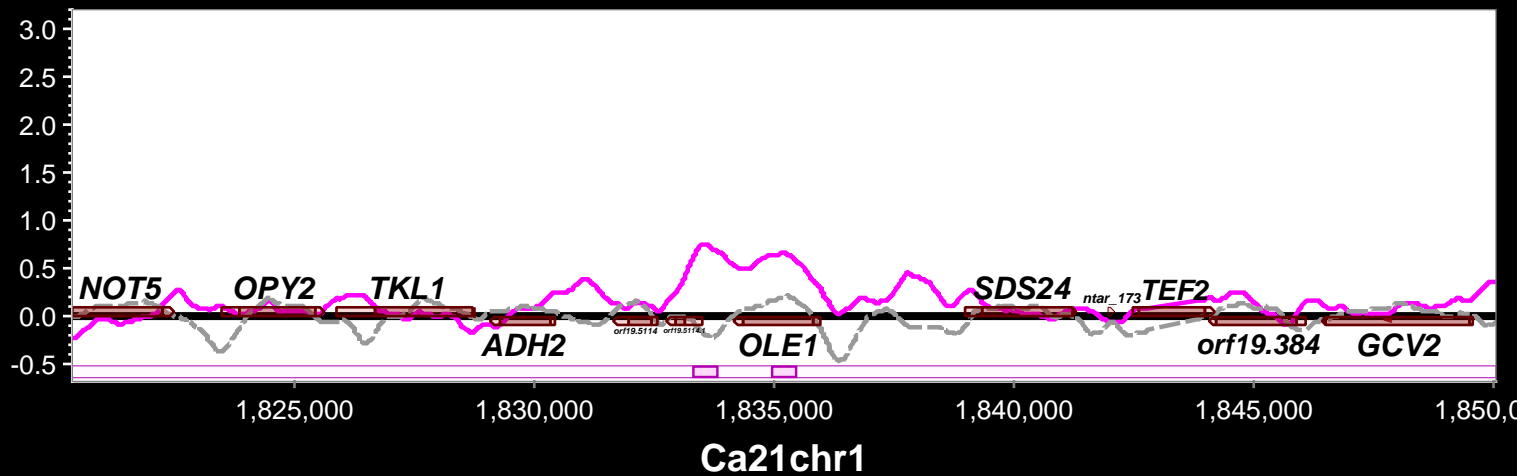

[0.656] Ca21chr5:755017-784700 [+] [tE(UUC)5, orf19.2639, orf19.2639.1, orf19.2638, FUR1]

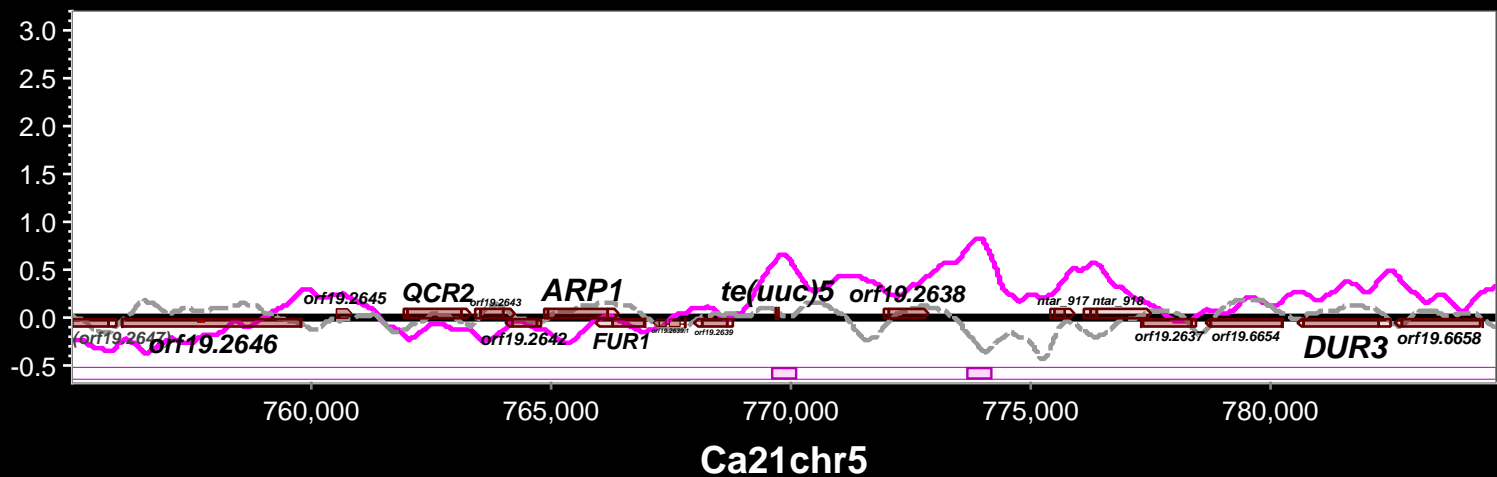

[0.655] Ca21chrR:1548335-1578018 [+] [orf19.732, orf19.733, EMP46, orf19.730, GLK1]

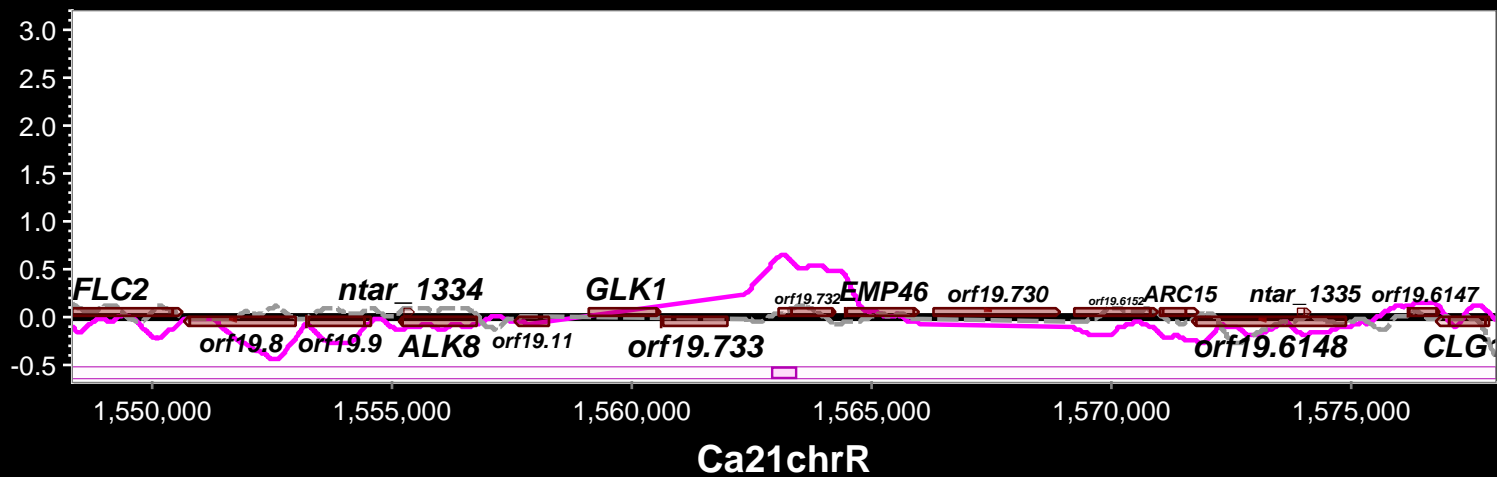

[0.653] Ca21chr3:1108298-1137981 [+] [RHB1, WOR2, MCA1, RPS19A, DYN1]

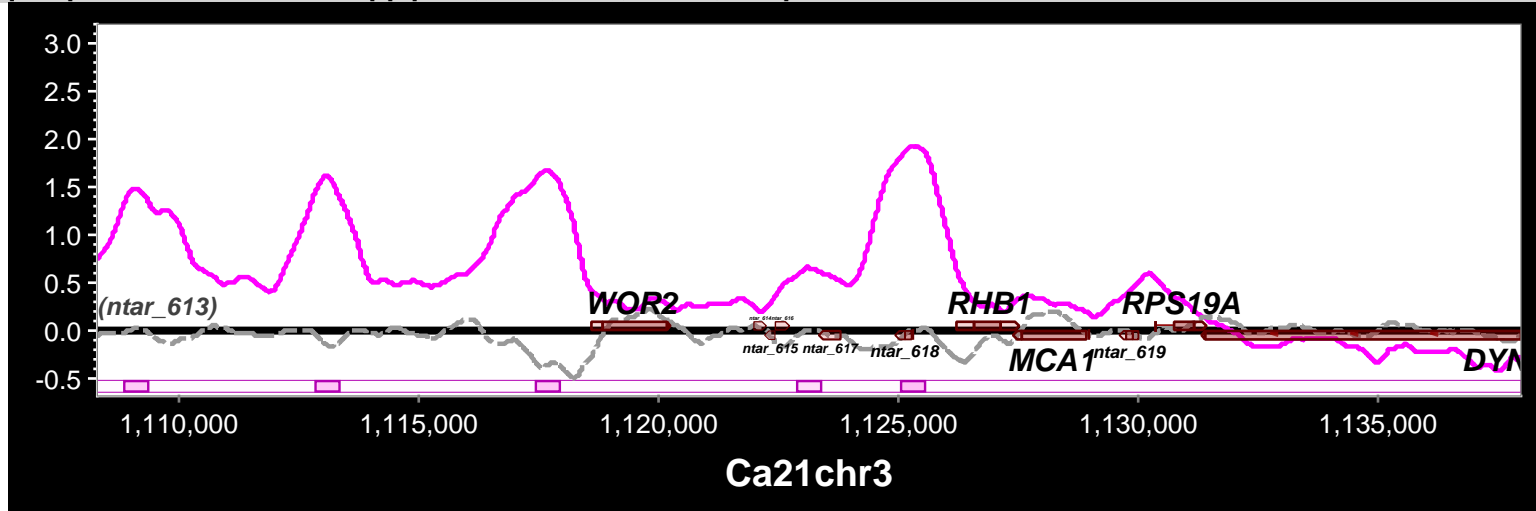

[0.652] Ca21chr7:428834-458517 [+] [HSP90, RAD14, orf19.6518, CUP9, orf19.6520]

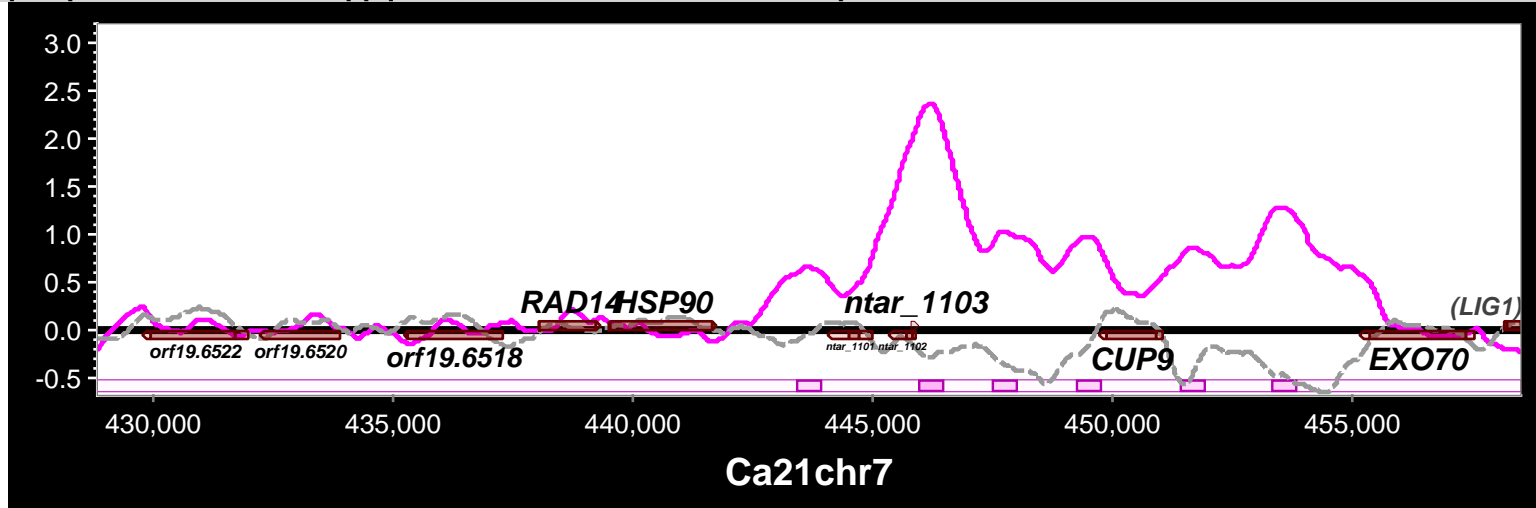

[0.651] Ca21chr1:3150397-3180080 [+] [orf19.7252, WSC4, orf19.7254, RPC10, orf19.7250]

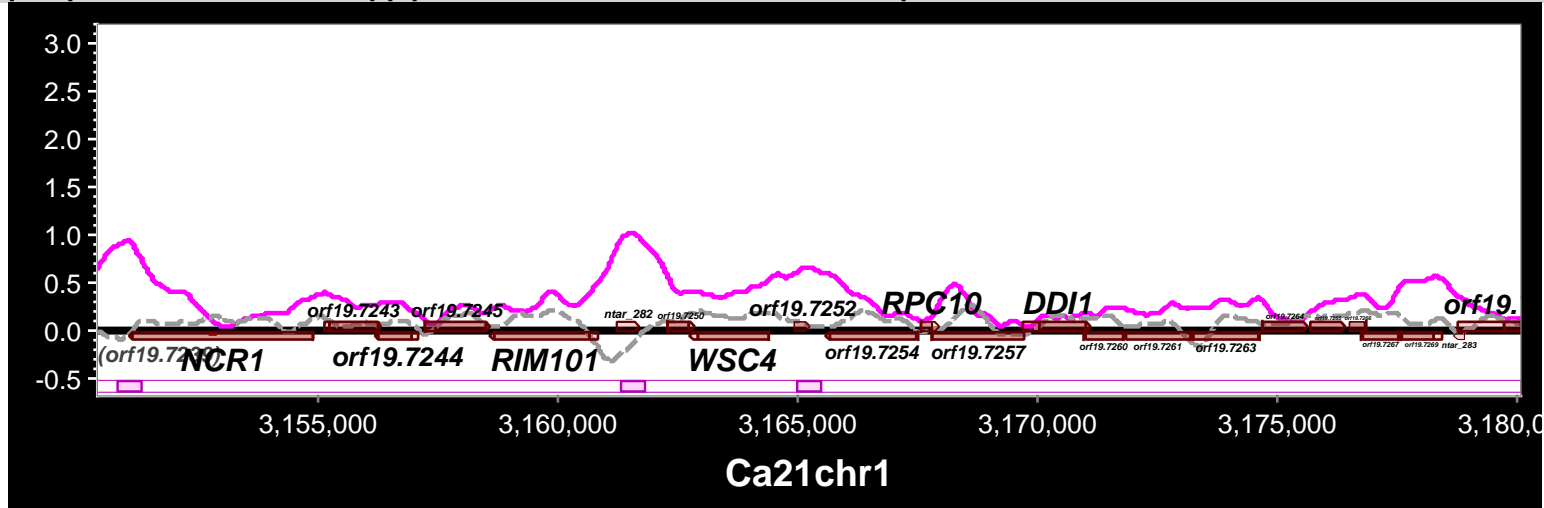

[0.651] Ca21chr2:1873693-1903376 [+] [tP(UGG)2, orf19.4081, DDR48, orf19.4080, KIS1]

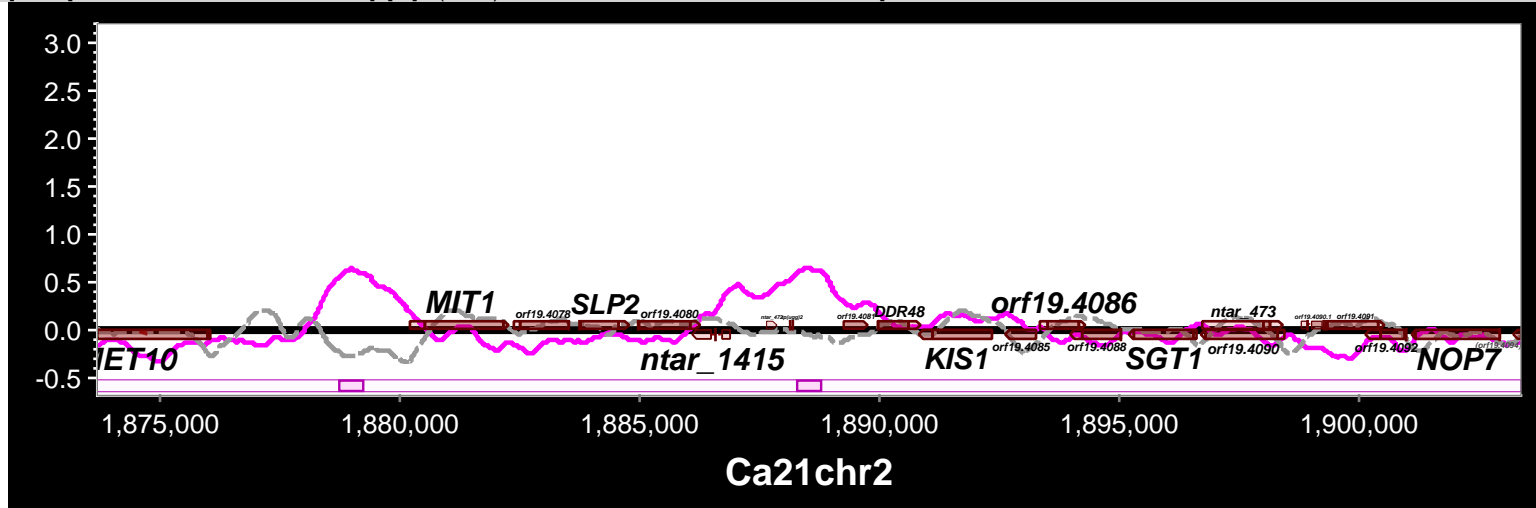

[0.651] Ca21chr7:395592-425275 [+] [CDC34, orf19.6530, orf19.6528, NUC2, TOM71]

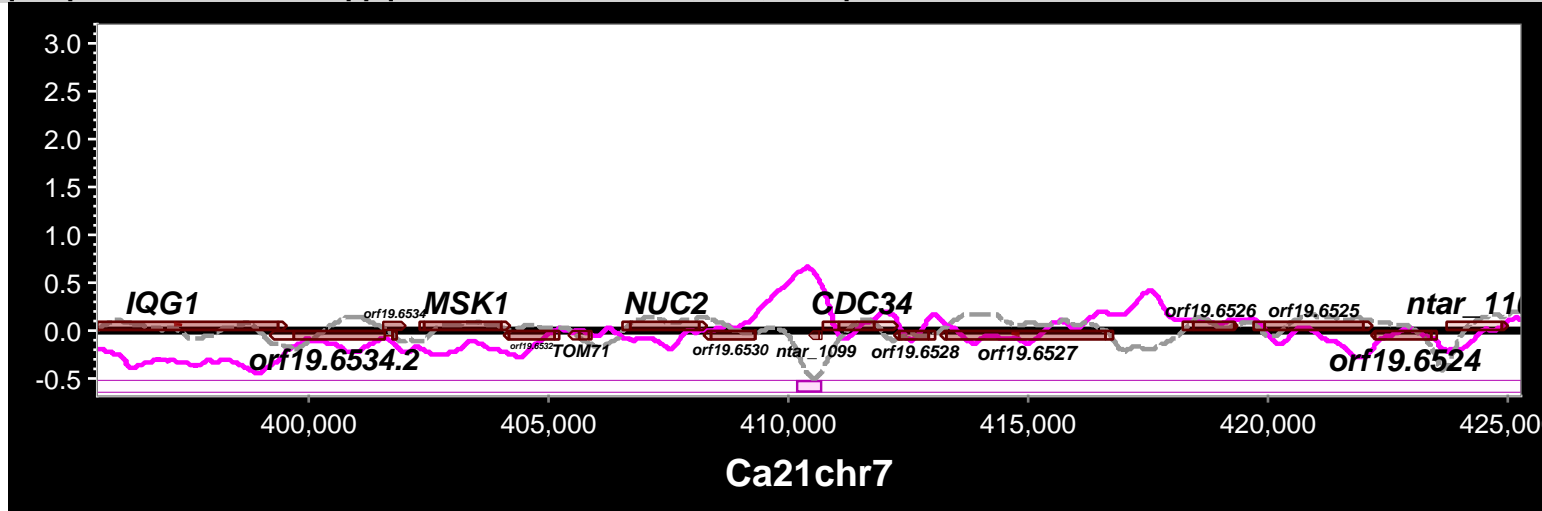

[0.647] Ca21chr4:713019-742702 [+] [ECE1, orf19.3373, orf19.3371, orf19.3376, DOT4]

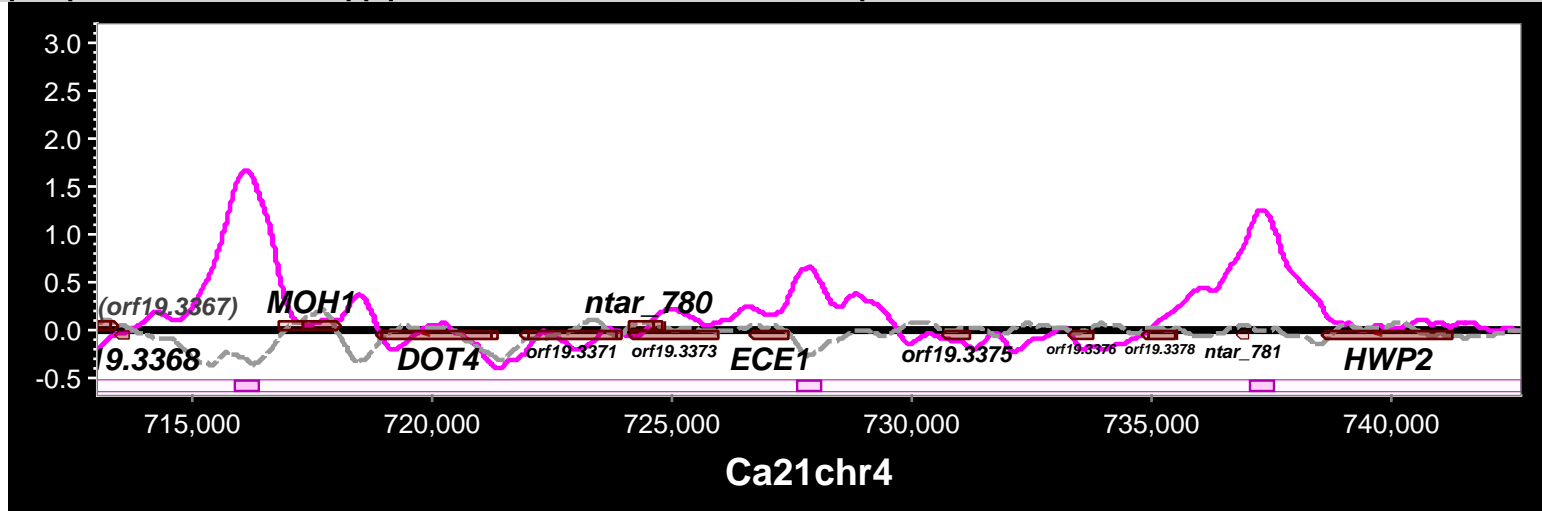

[0.642] Ca21chr4:554694-584377 [+] [orf19.2725, orf19.2724, HIT1, orf19.2726, CGR1]

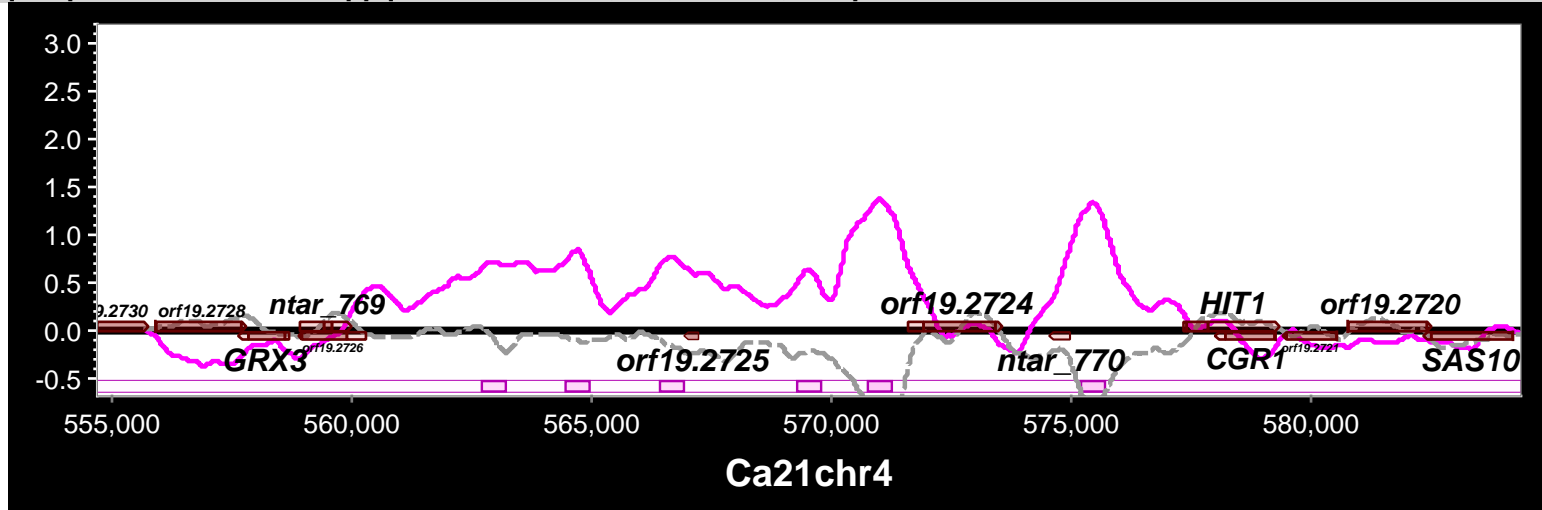

[0.641] Ca21chr1:2669330-2699013 [+] [orf19.5233, RBD1, CSI2, orf19.5231.2, orf19.5231]

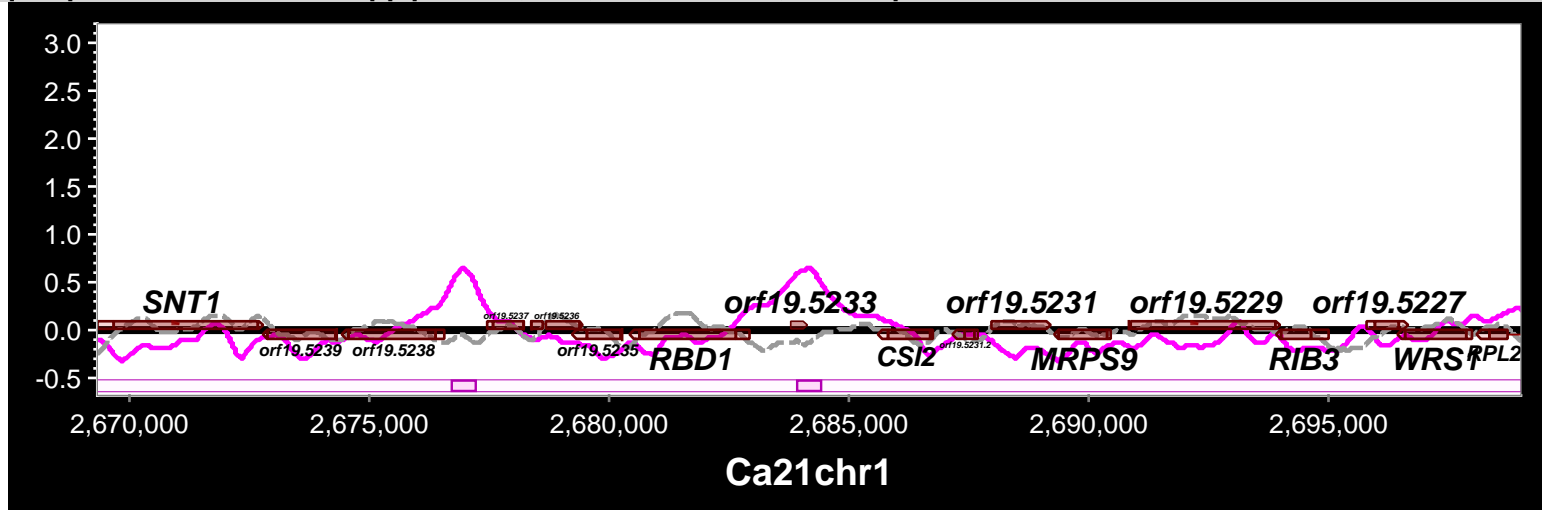

[0.641] Ca21chr3:1-29684 [+] [RPS24, TLO7, orf19.5465, orf19.5464, orf19.5463]

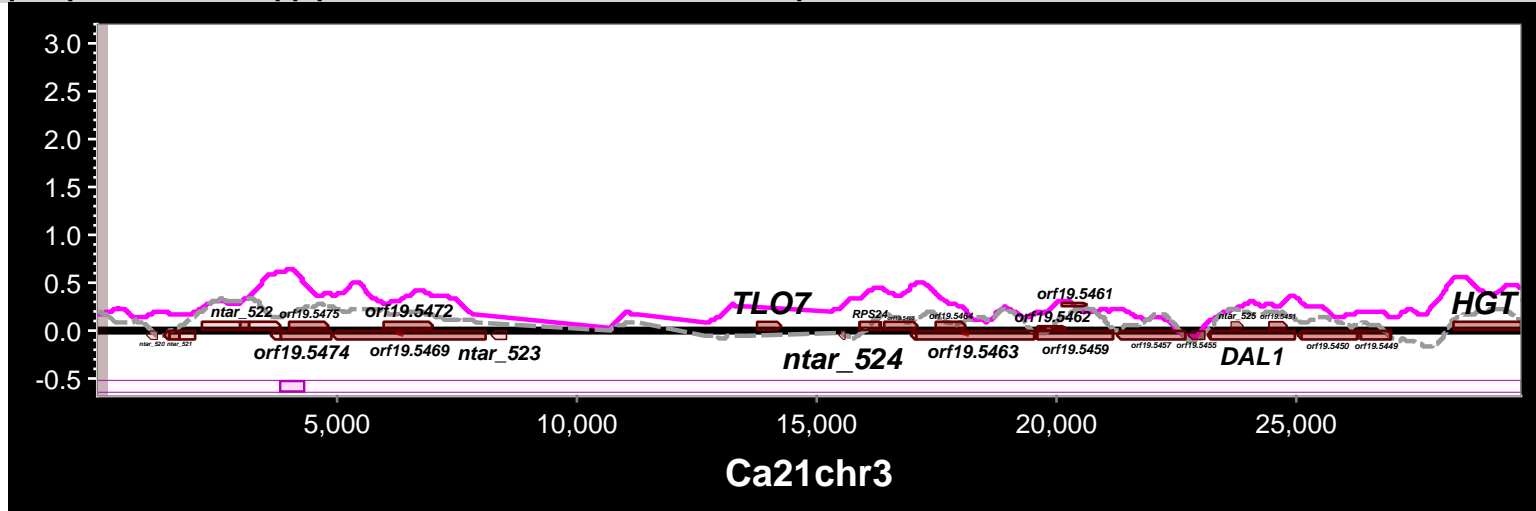

[0.641] Ca21chr3:113389-143072 [+] [CHS8, PMA1, orf19.5381, VPS8, SWD1]

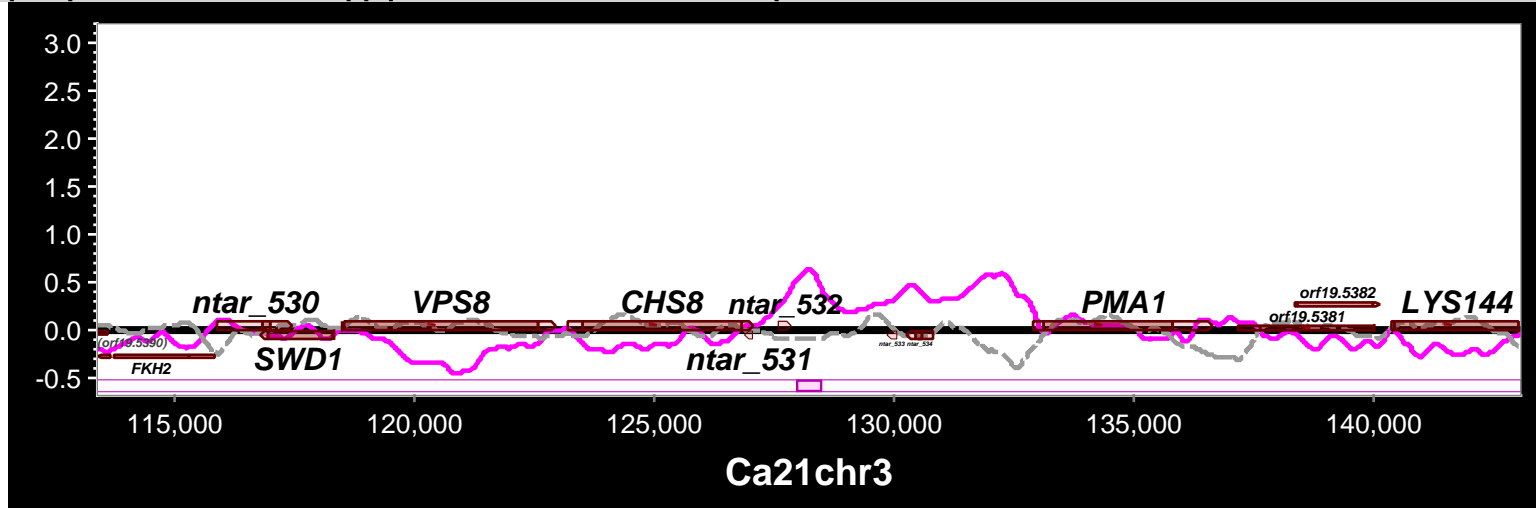

[0.641] Ca21chr3:171308-200991 [+] [orf19.6169, orf19.6168, orf19.2496, AYR1, orf19.2498]

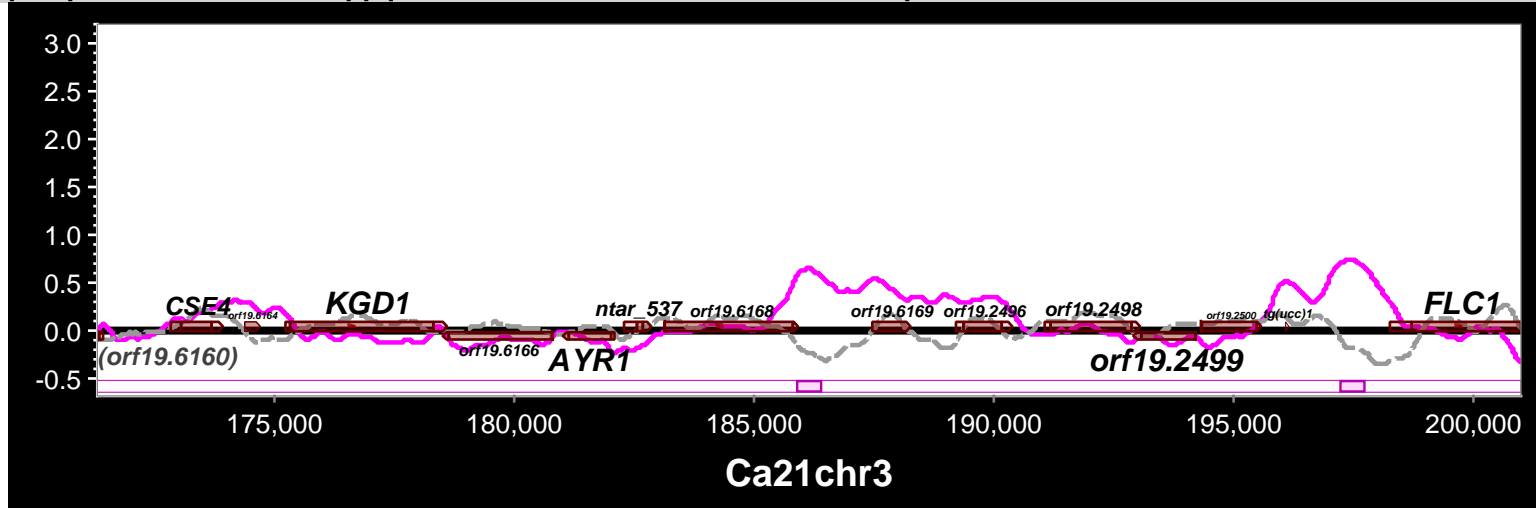

[0.641] Ca21chr3:1399354-1429037 [+] [ALS6, MMS21, MUB1, OAC1, orf19.7410]

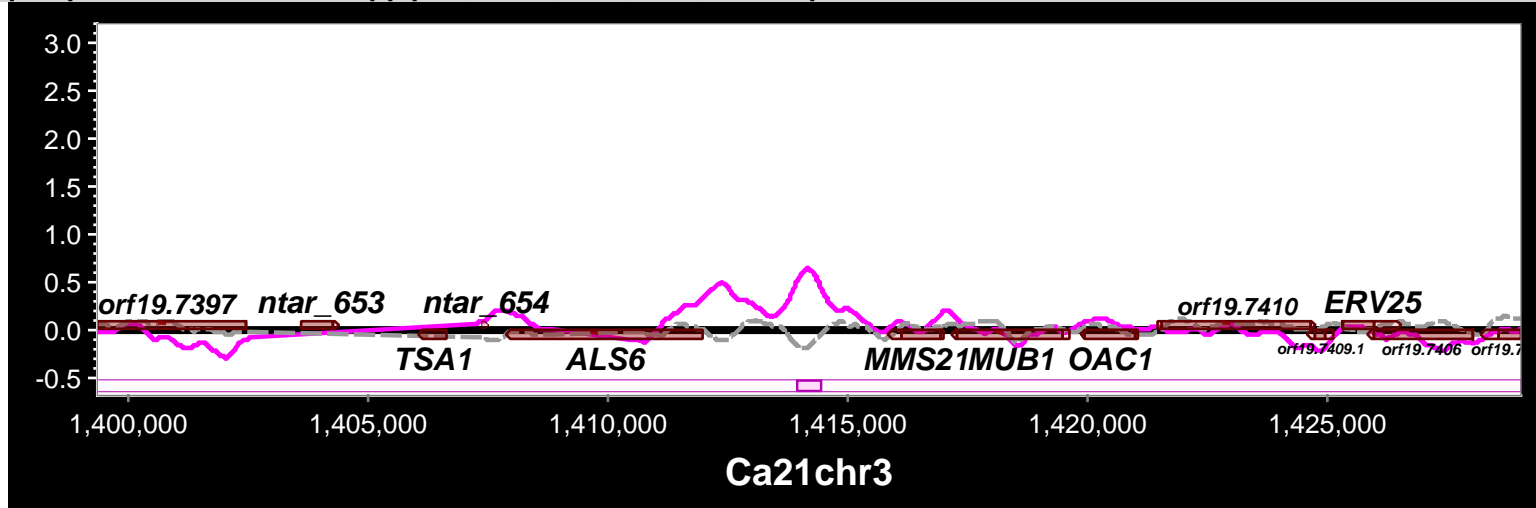

[0.64] Ca21chr1:2662129-2691812 [+] [orf19.5238, orf19.5237, orf19.5236, orf19.5239, orf19.5235]

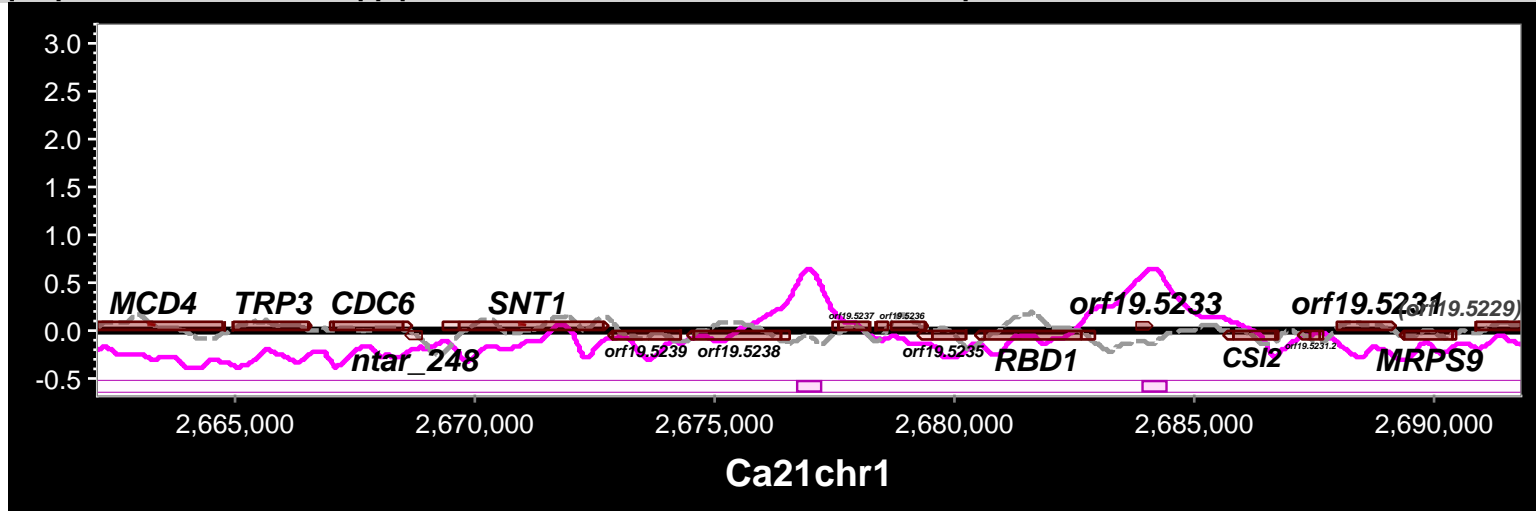

[0.64] Ca21chr5:84664-114347 [+] [orf19.938, NAM7, BUD2, orf19.936, SEC14]

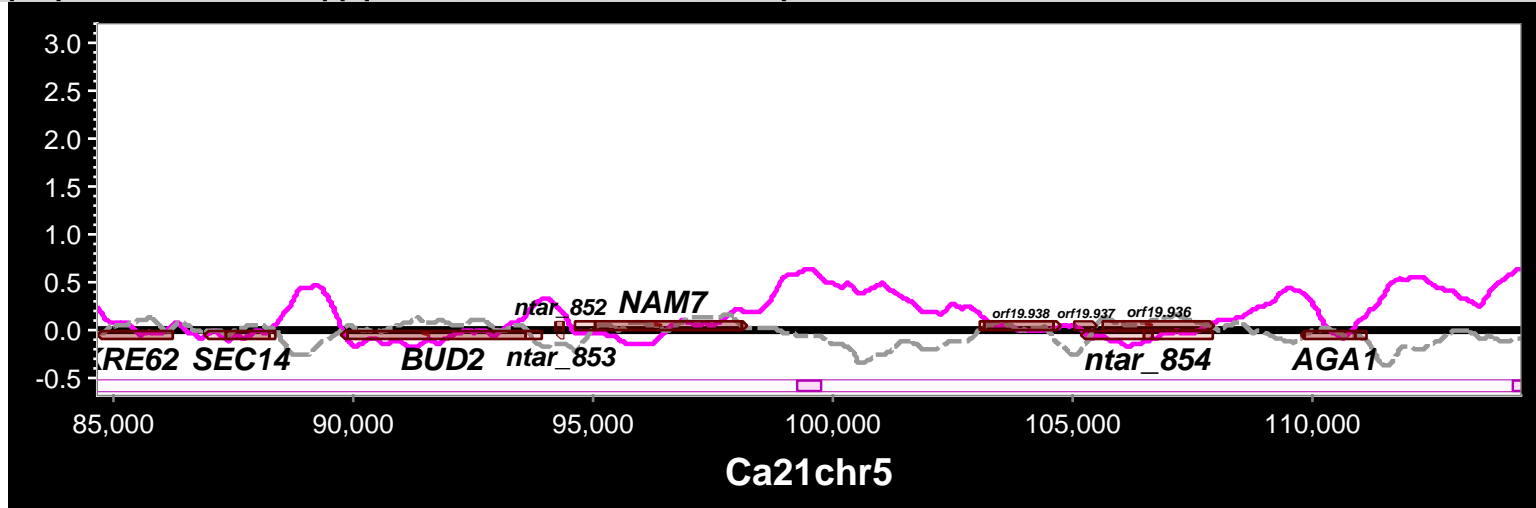

[0.633] Ca21chrR:1938754-1968437 [+] [ERG13, SSU1, orf19.7311, orf19.7310, CDG1]

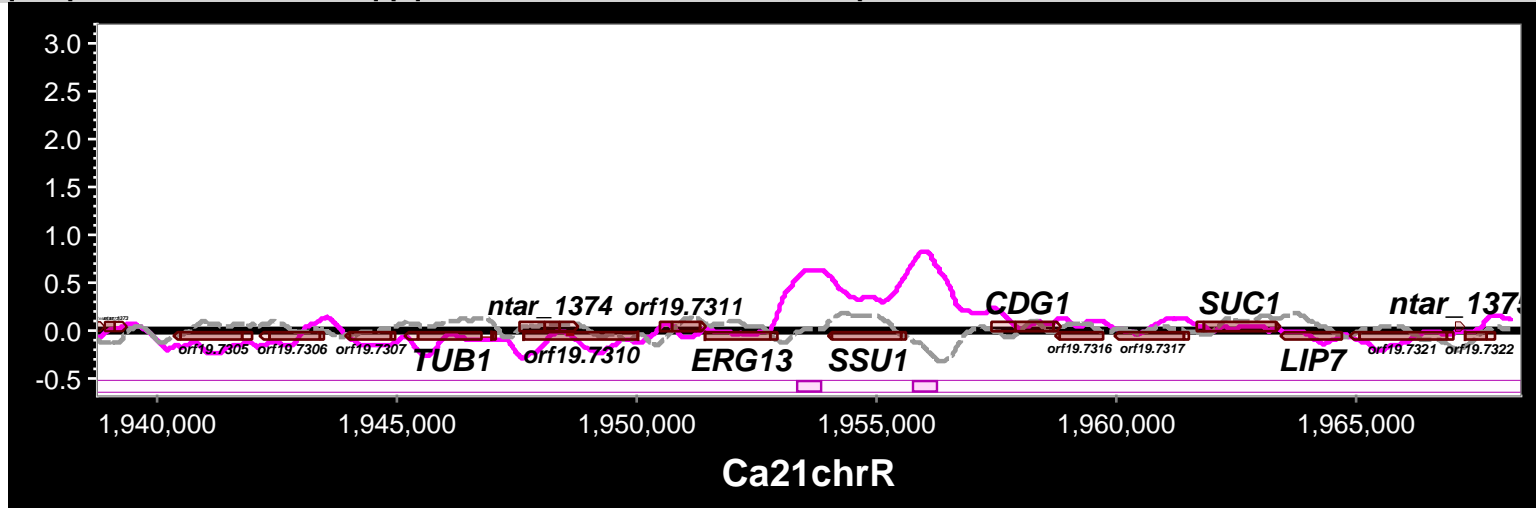

[0.632] Ca21chr1:877870-907553 [+] [SSA2, orf19.1066, GPM2, ACS2, RPN4]

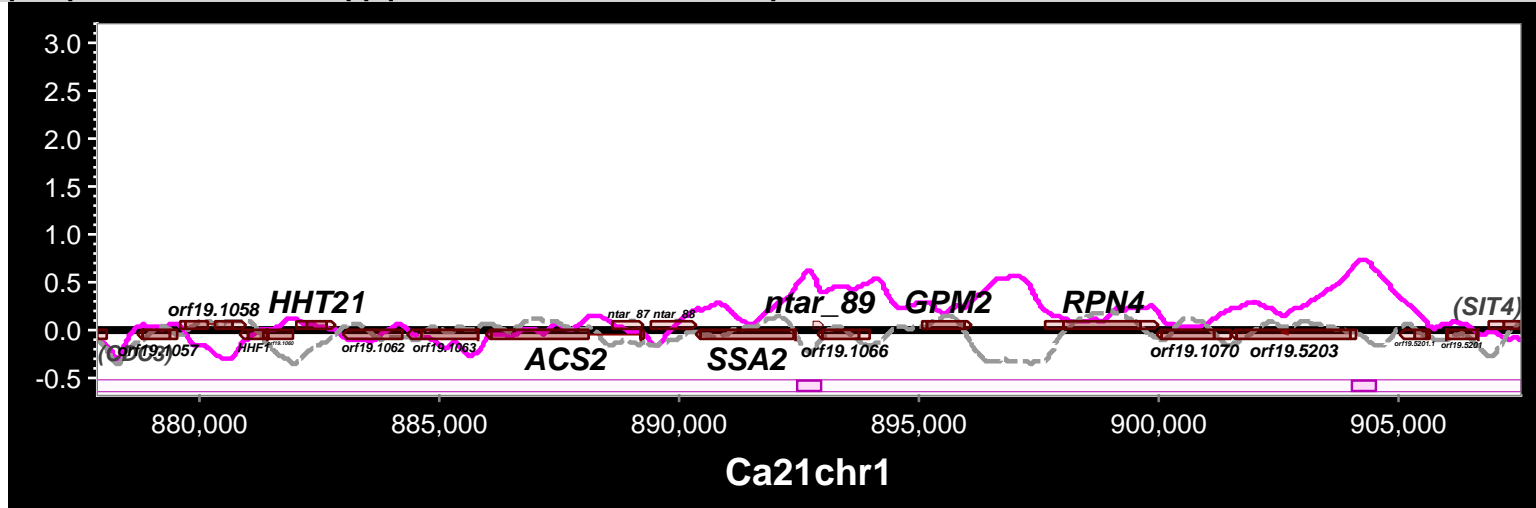

[0.631] Ca21chr2:1864146-1893829 [+] [MIT1, MET10, orf19.4078, SLP2, orf19.4080]

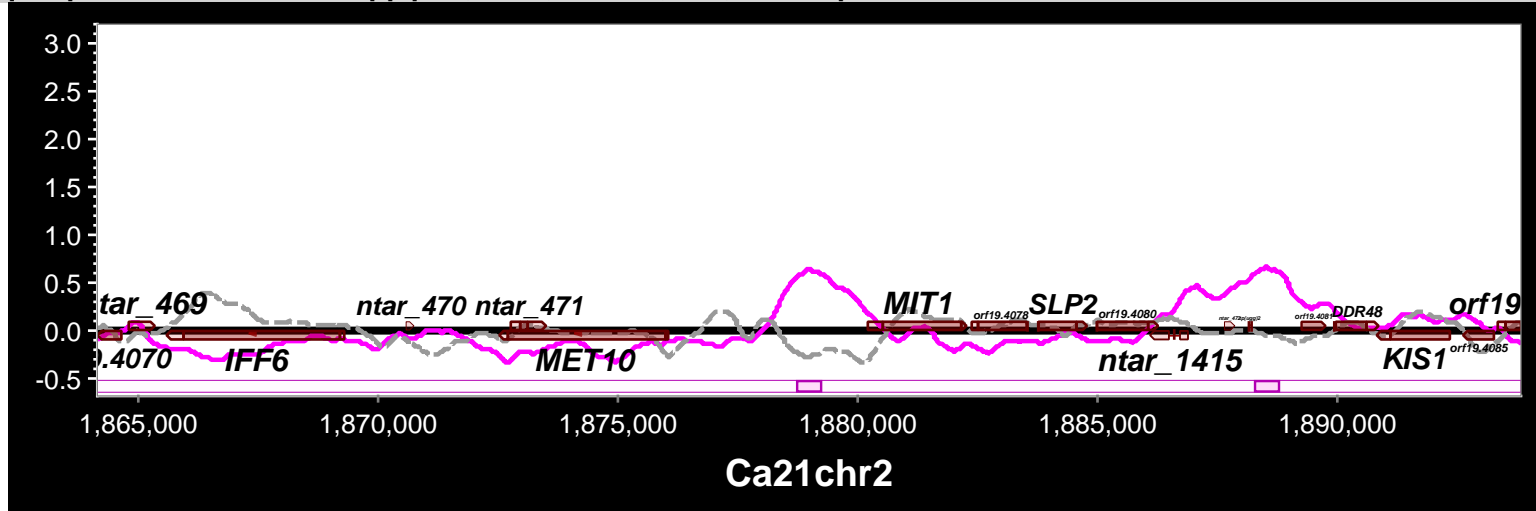

[0.631] Ca21chr5:99586-129269 [+] [AGA1, orf19.934, orf19.933, orf19.936, orf19.932]

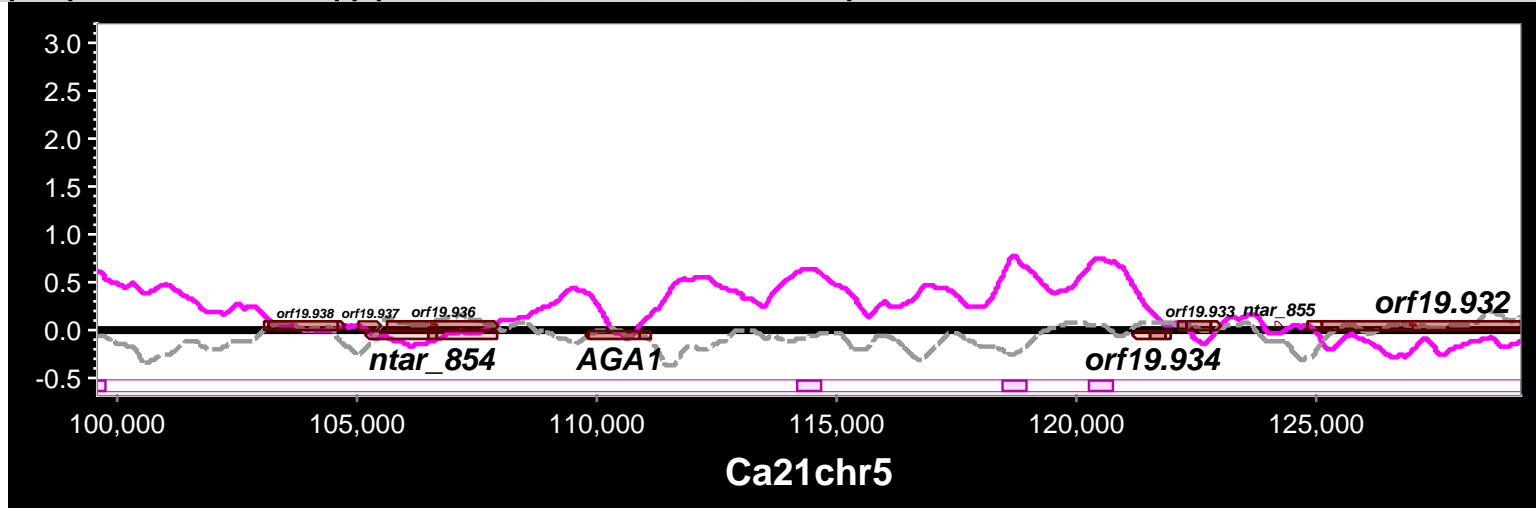

[0.631] Ca21chr6:276686-306369 [+] [orf19.3439, orf19.3438, orf19.3437, FRP5, orf19.3436]

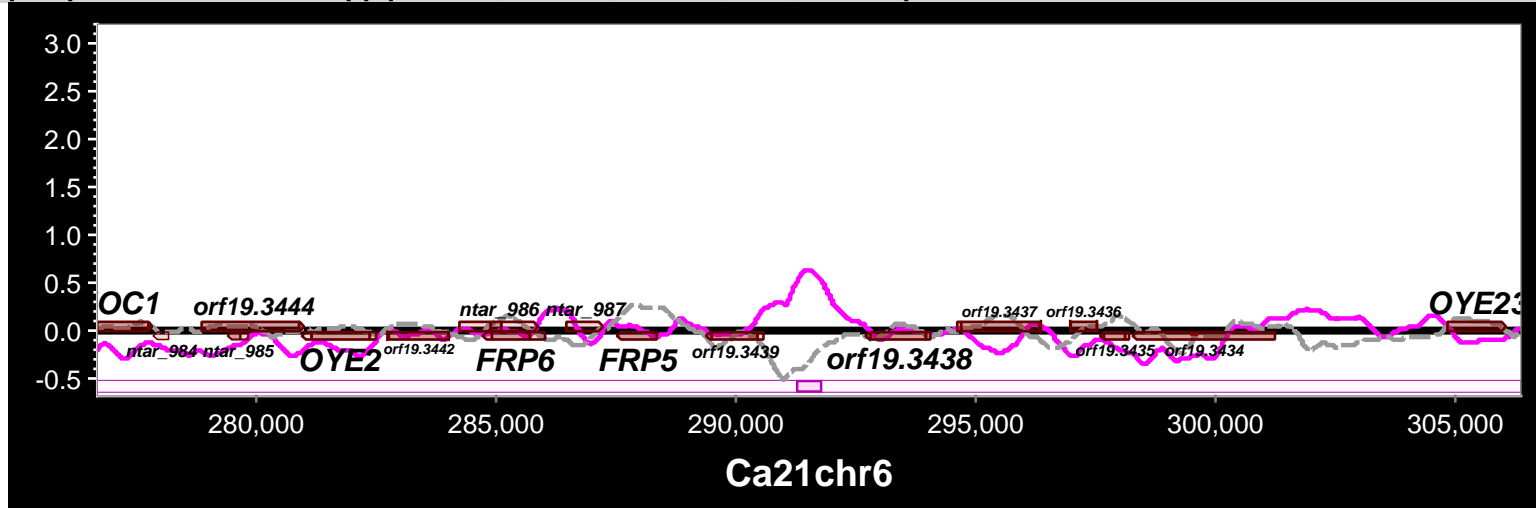

[0.631] Ca21chr6:545320-575003 [+] [SAP6, orf19.5543, orf19.5541, SAC6, orf19.5547]

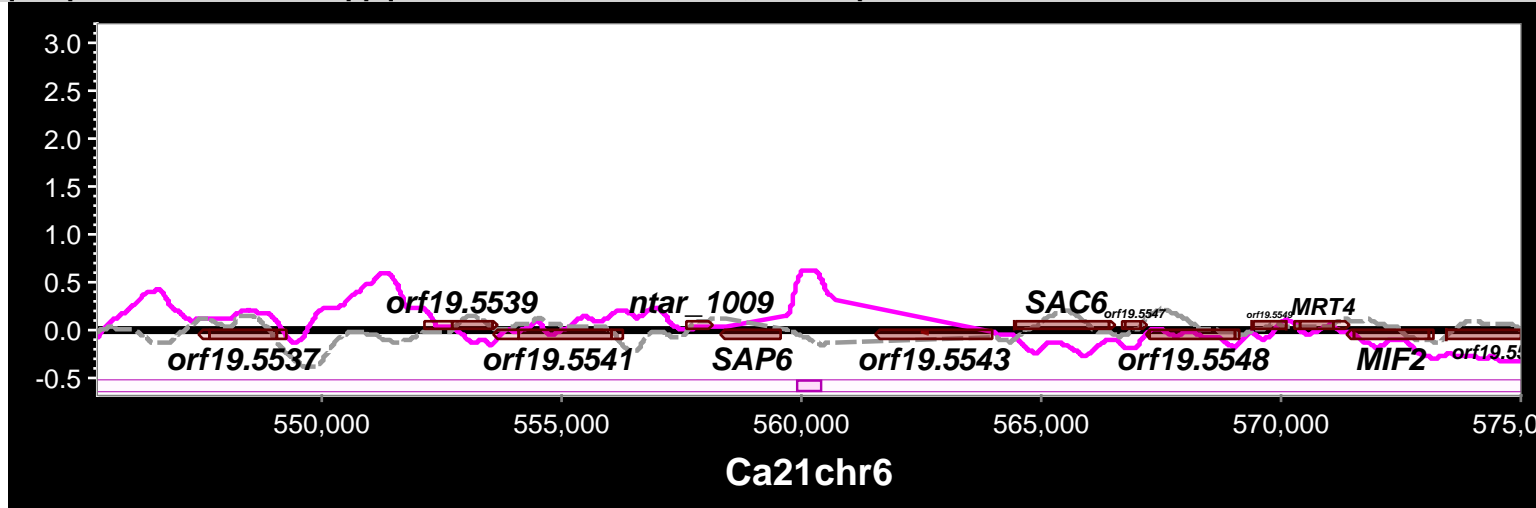

[0.631] Ca21chrR:1684874-1714557 [+] [orf19.3711, YHB5, orf19.3712, orf19.3713, SAP2]

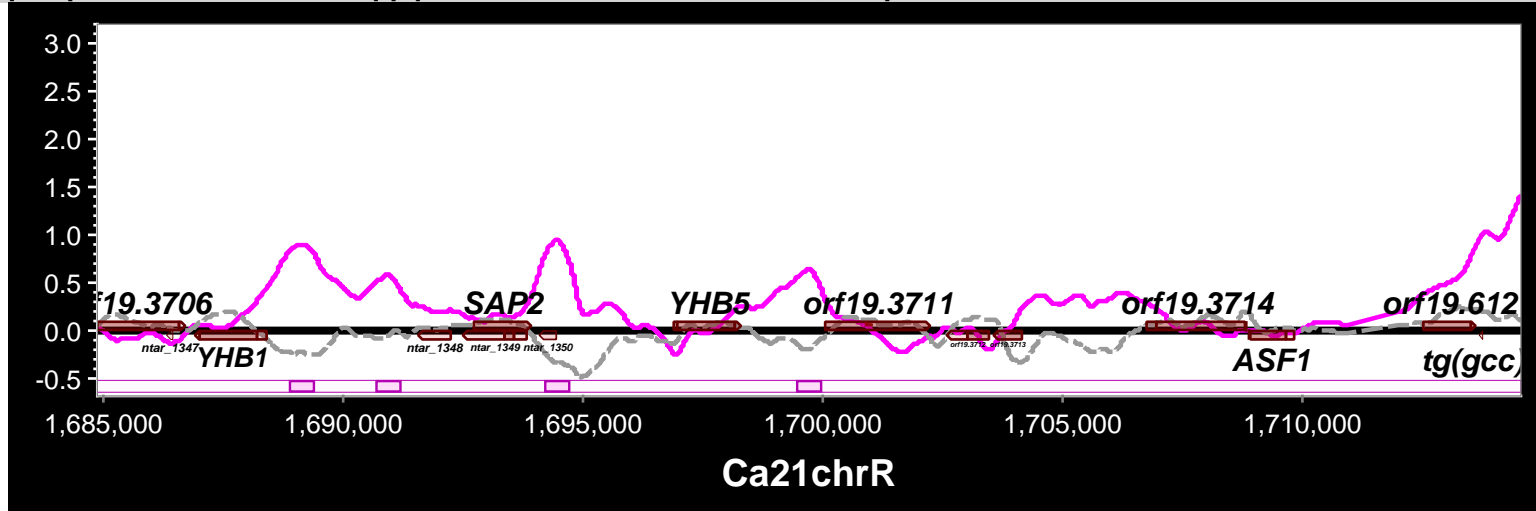

[0.631] Ca21chrR:1710937-1740620 [+] [orf19.609, EFG1, orf19.607, orf19.606, orf19.605]

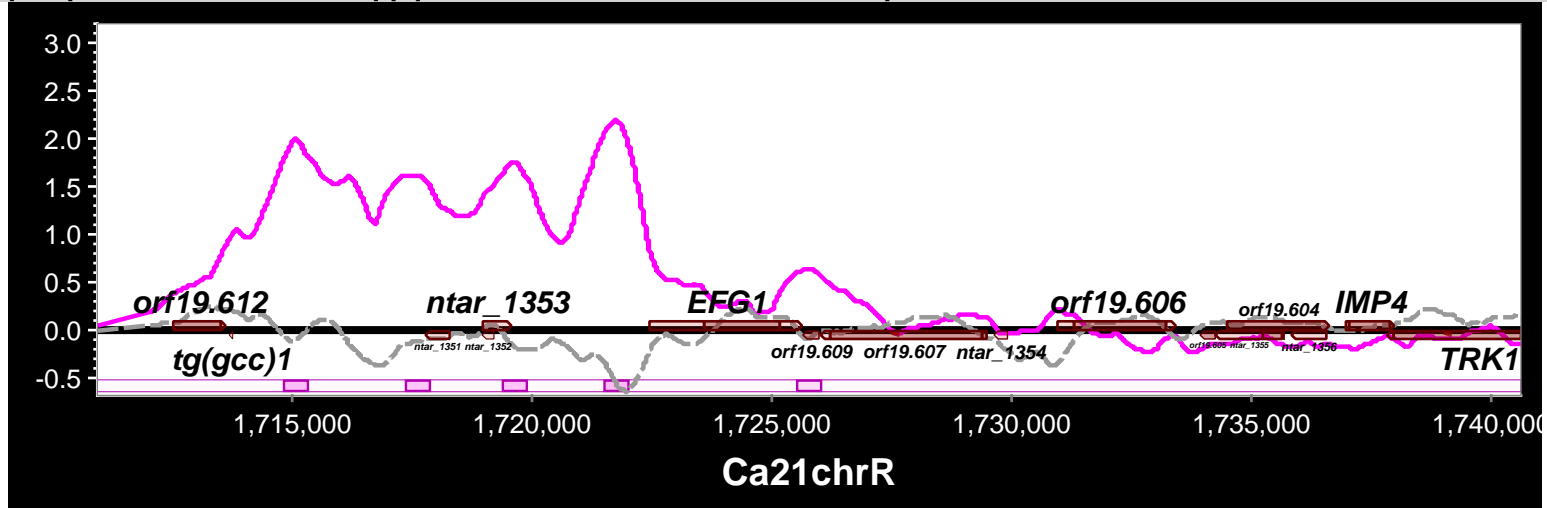

[0.631] Ca21chrR:1996593-2026276 [+] [tD(GUC)7, orf19.7341, orf19.7341.1, orf19.7340, BGL22]

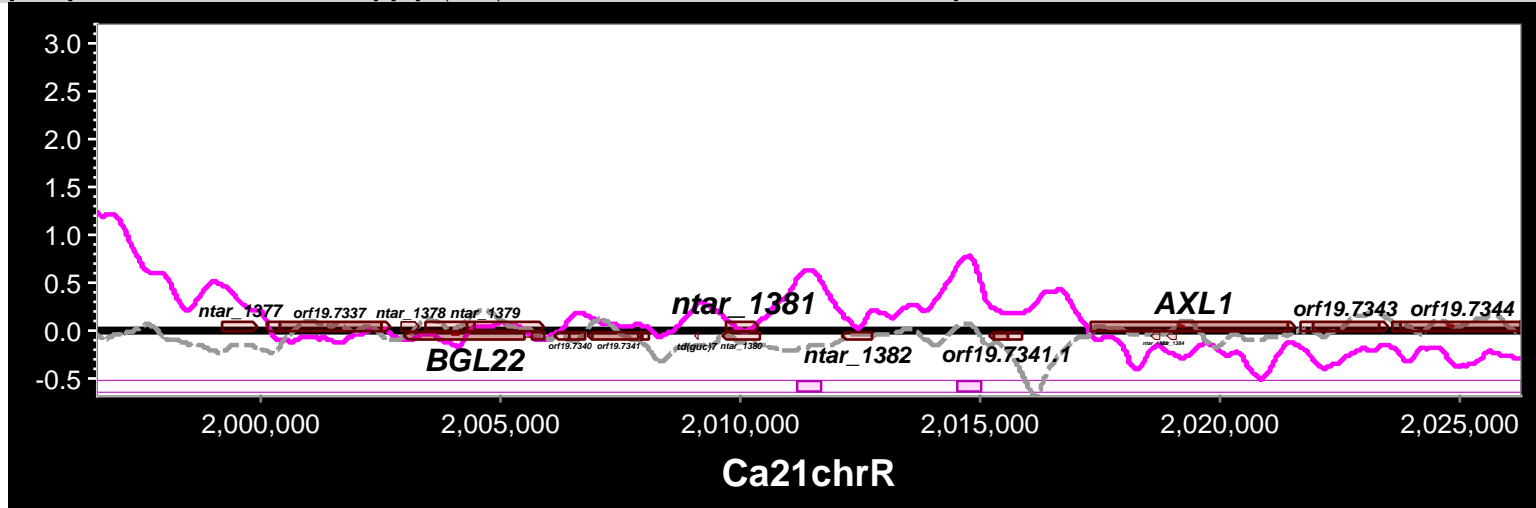

[0.63] Ca21chr4:905696-935379 [+] [COX11, orf19.1417, FRE10, SEC15, orf19.1420]

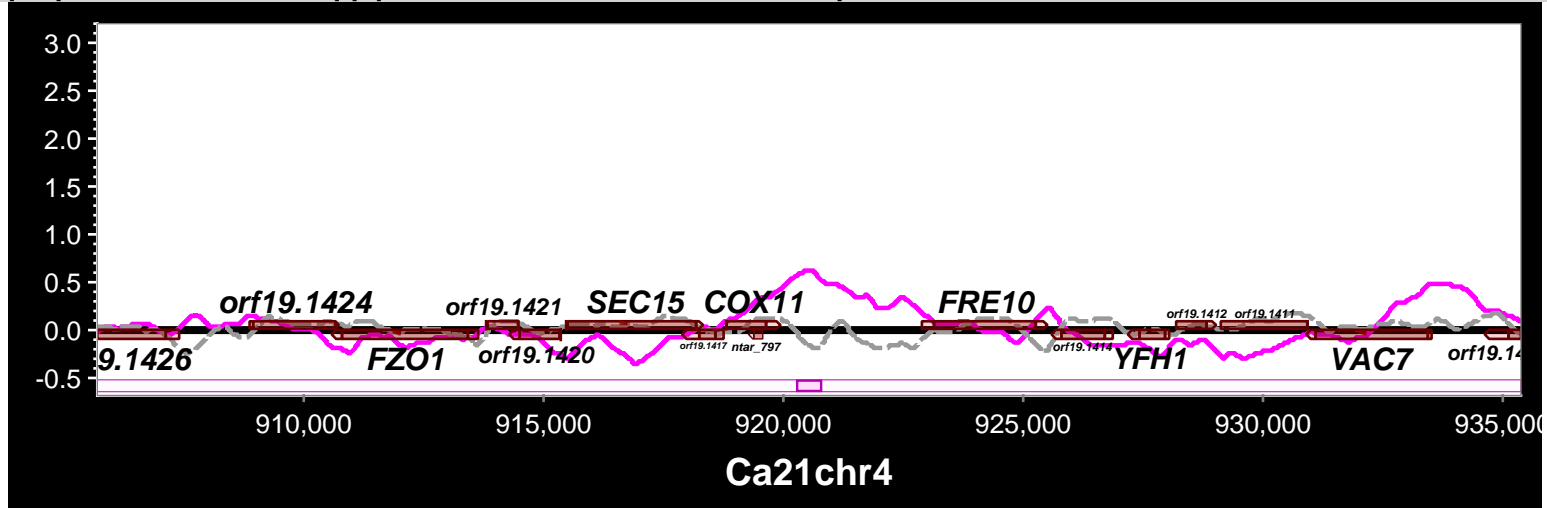

[0.626] Ca21chr4:528052-557735 [+] [SUL2, orf19.2737, orf19.2739, orf19.2736, orf19.2740]

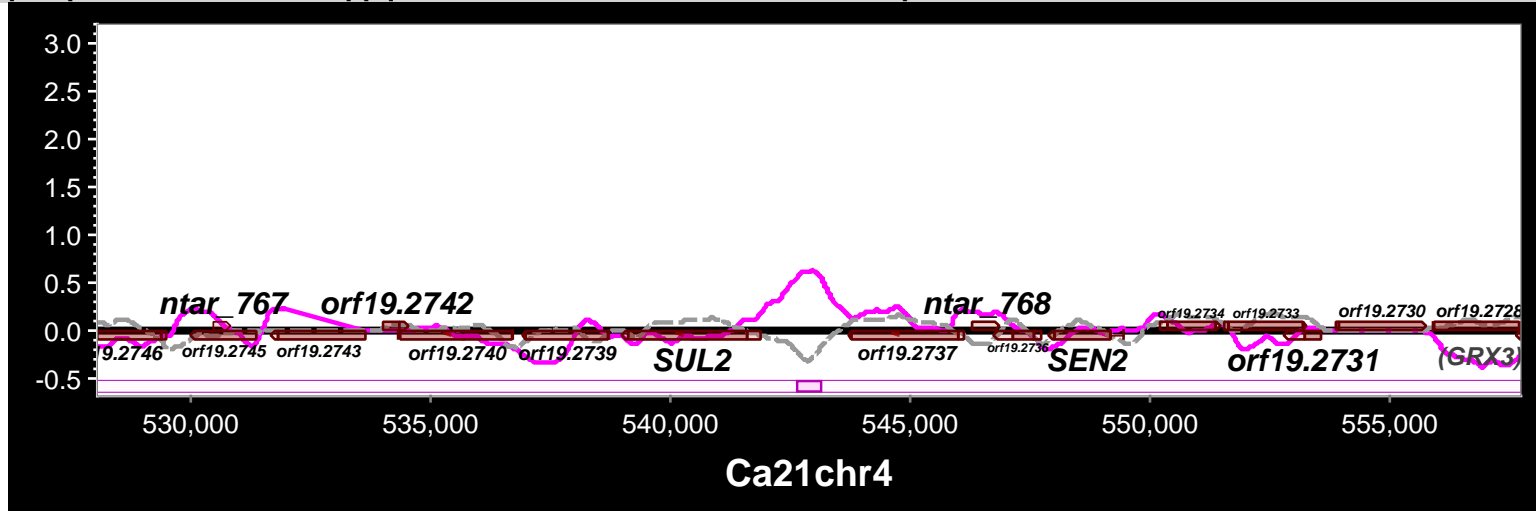

[0.621] Ca21chr2:477066-506749 [+] [ERG7, UTP22, orf19.1571, tV(AAC)1, orf19.1567]

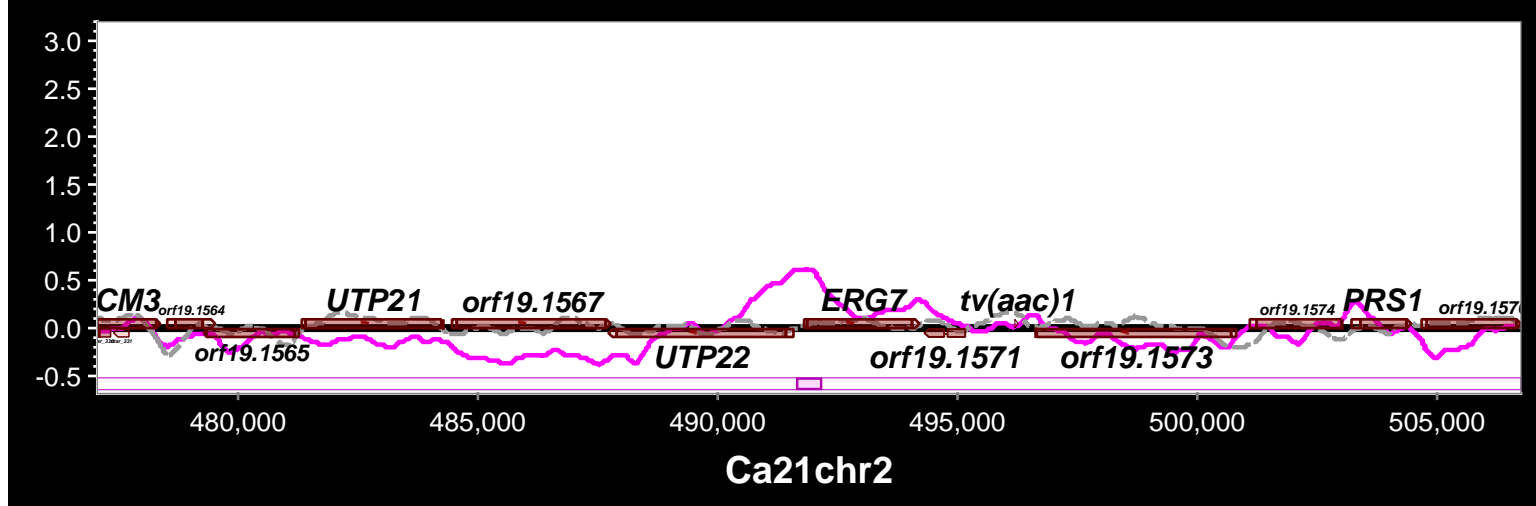

[0.621] Ca21chr5:140897-170580 [+] [RMT2, orf19.921, TFB3, SPE2, ERG11]

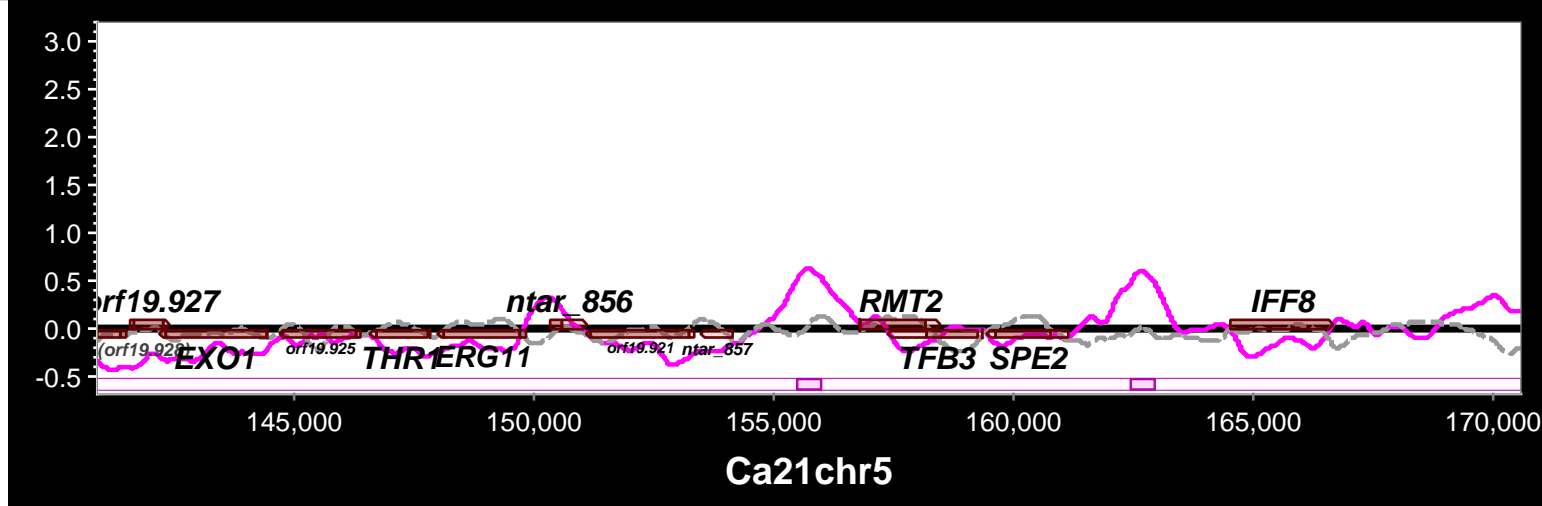

[0.62] Ca21chrR:1182467-1212150 [+] [orf19.5843, orf19.6653, DBP8, orf19.6650, BRF1]

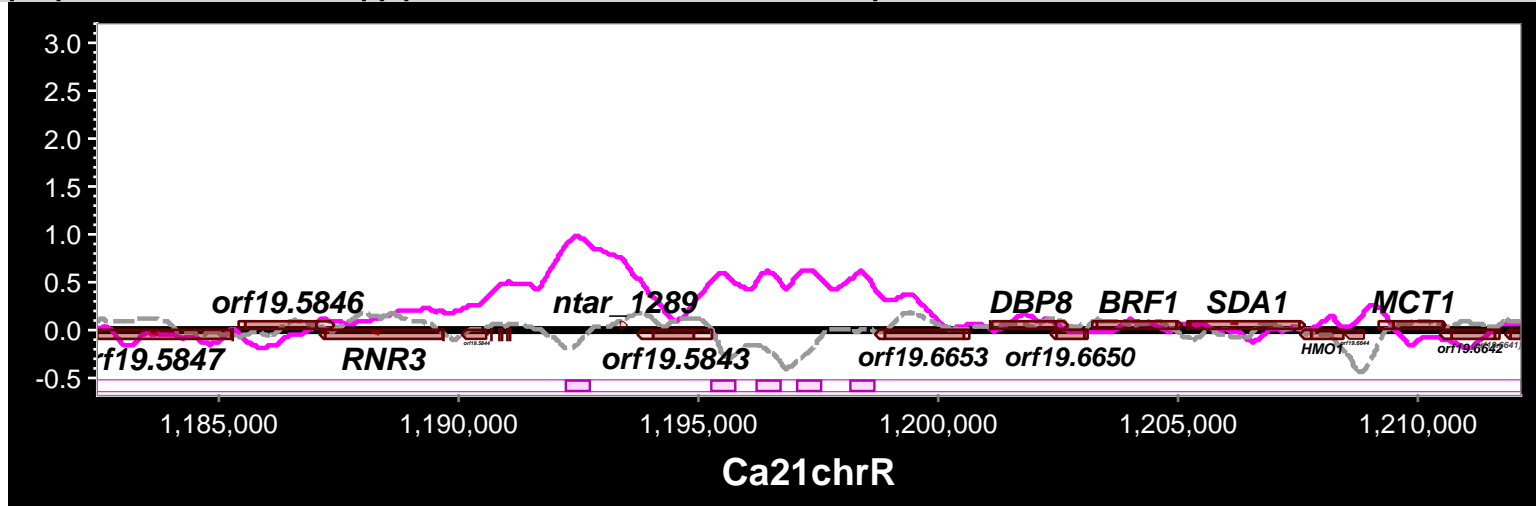



[0.62] Ca21chrR:1618911-1648594 [+] [ECM22, orf19.2624, orf19.2625, YPT31, RGD3]

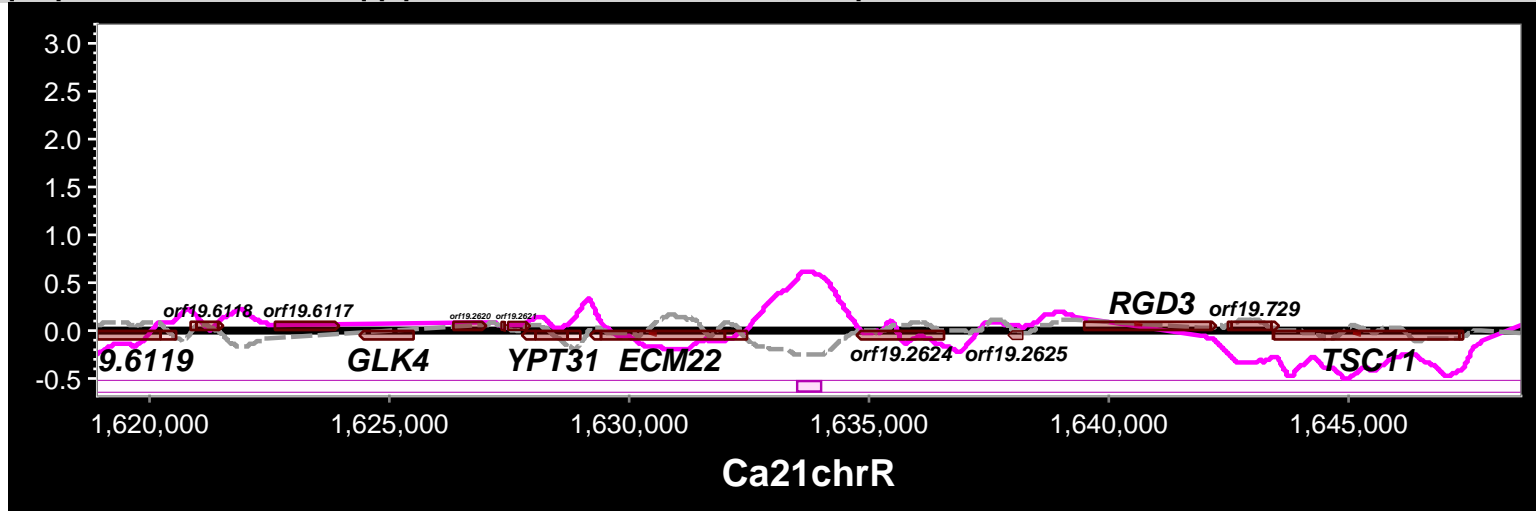

[0.614] Ca21chr2:775336-805019 [+] [tR(UCU)2, tF(GAA)2, YIM1, orf19.849, orf19.846]

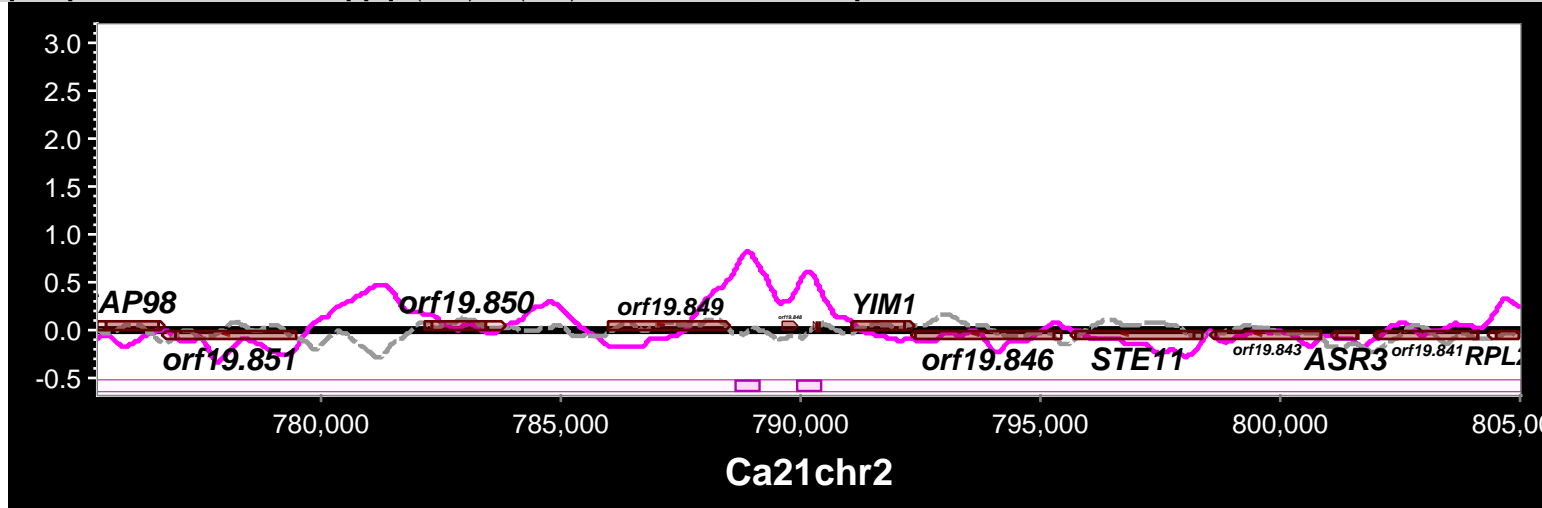

[0.613] Ca21chr2:237235-266918 [+] [CLB2, ESC4, orf19.1447, APT1, orf19.1448.1]

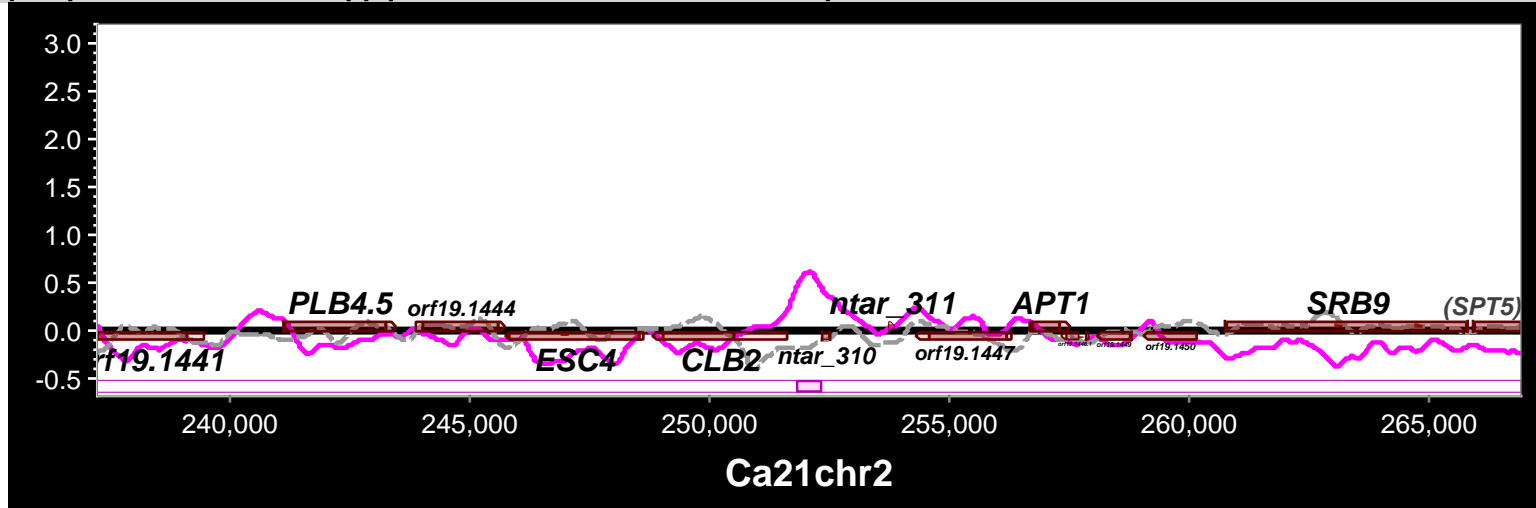

[0.613] Ca21chr4:755812-785495 [+] [OSH3, orf19.1314, tQ(UUG)1, CDR3, orf19.1318]

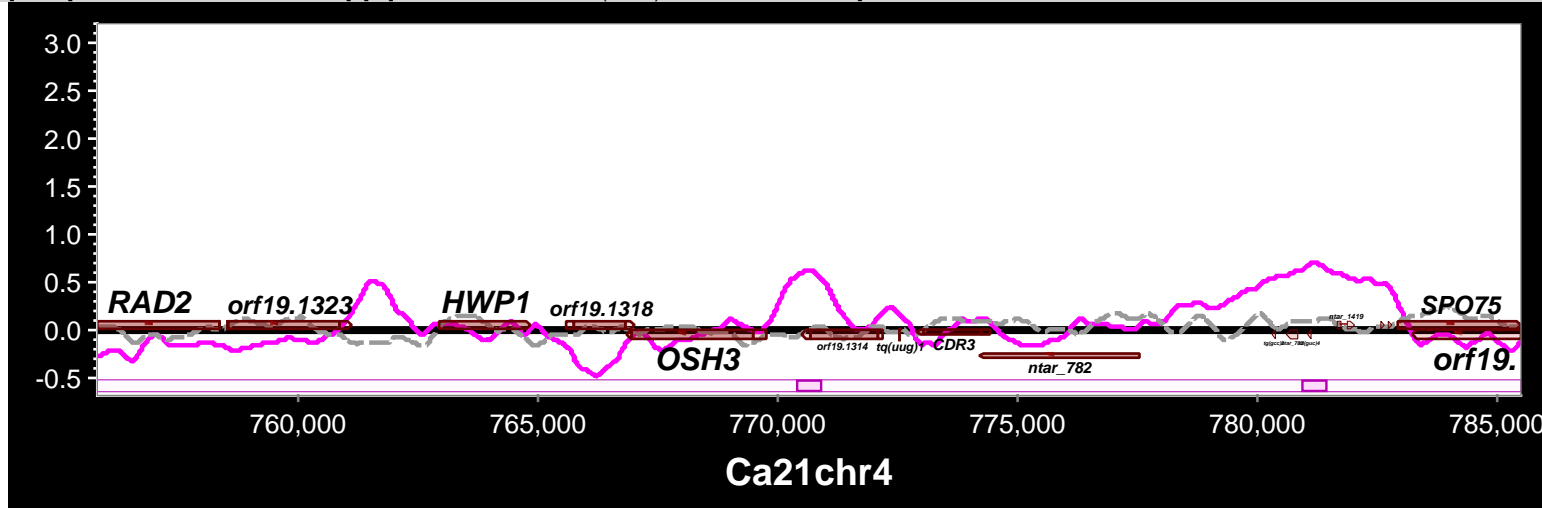

[0.612] Ca21chr6:151662-181345 [+] [orf19.86, GPX2, GPX1, CAN3, ILV5]

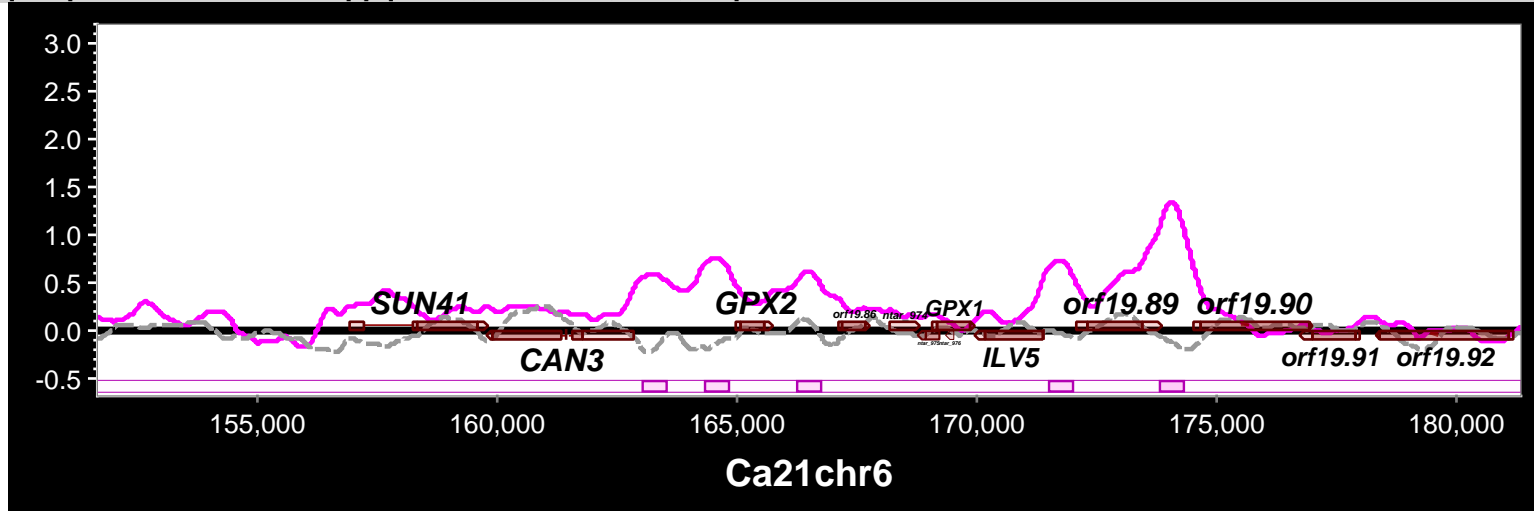

[0.612] Ca21chrR:1463407-1493090 [+] [ALG6, orf19.1842, tS(AGA)2, orf19.1844, orf19.1841]

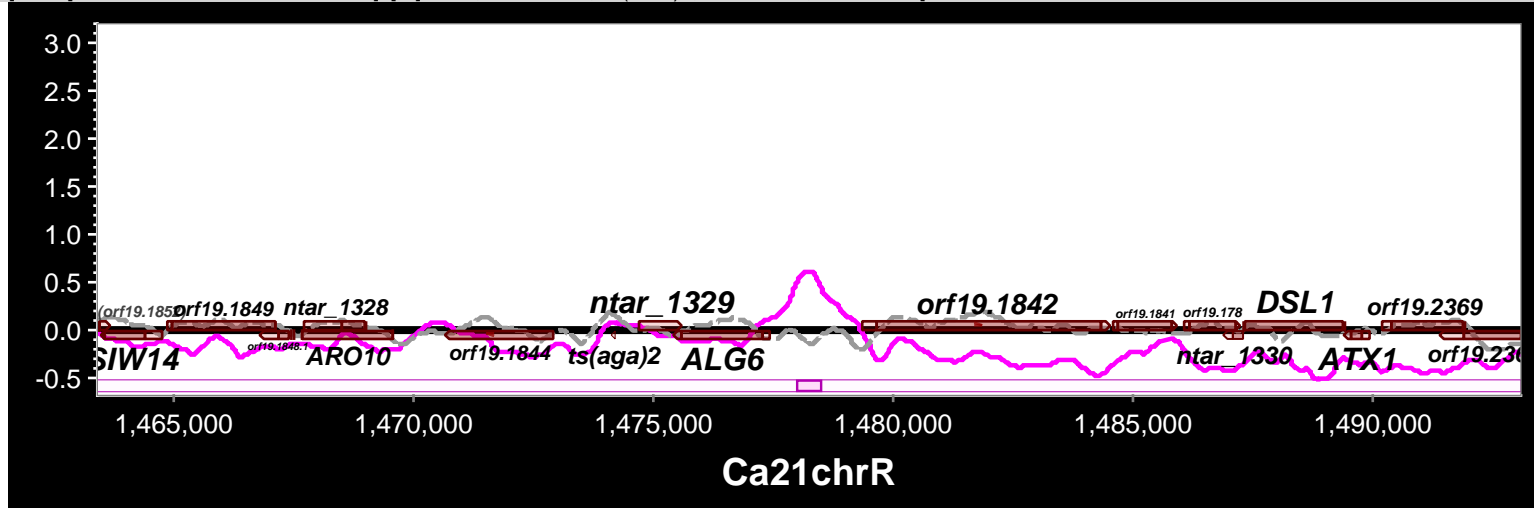

[0.611] Ca21chr3:1622709-1652392 [+] [RPS12, PGA32, orf19.6786, orf19.6787, orf19.6783]

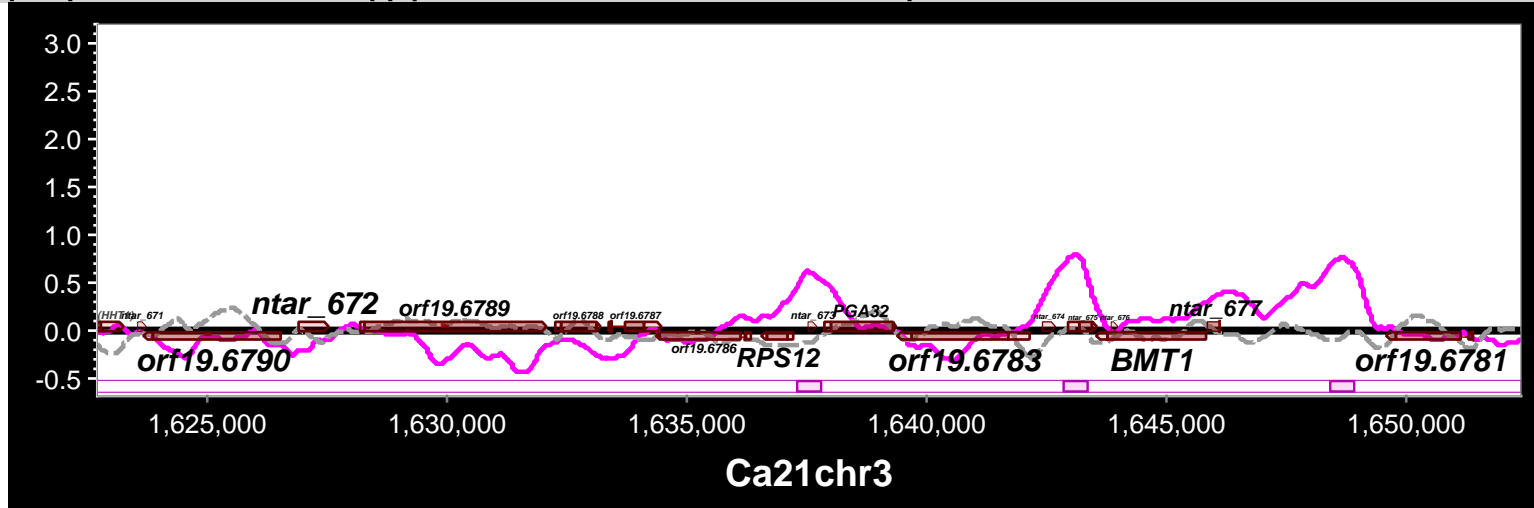

[0.611] Ca21chrR:1181621-1211304 [+] [orf19.5843, orf19.6653, DBP8, tC(GCA)1, tC(GCA)2]

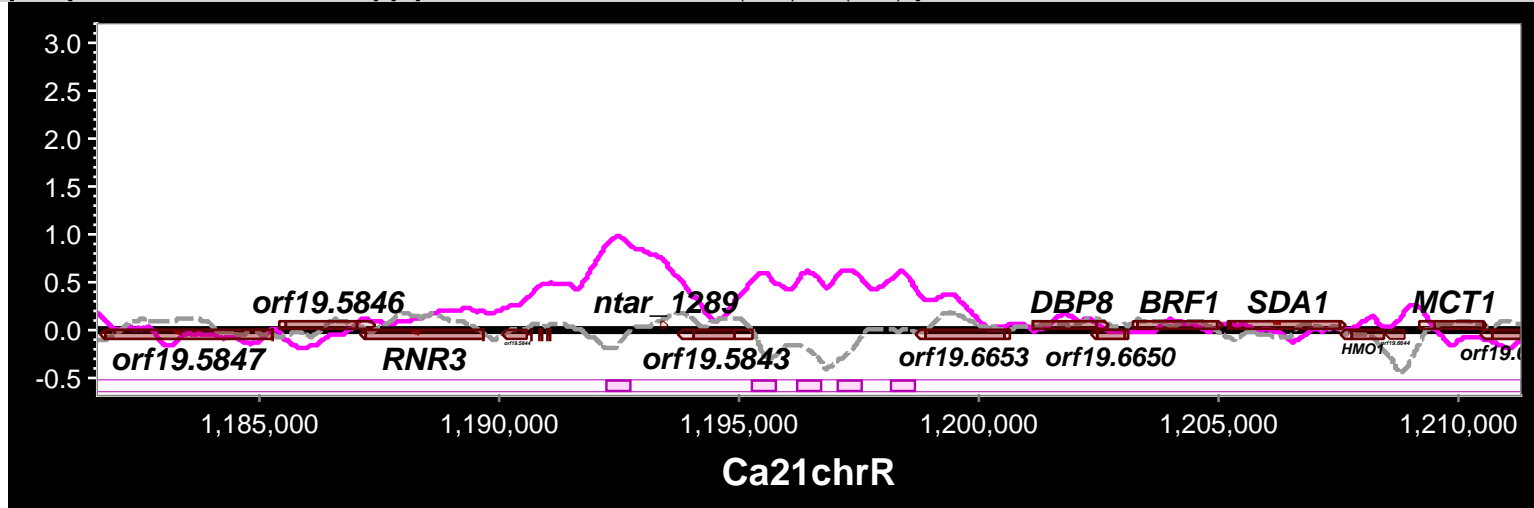

[0.61] Ca21chr2:1119886-1149569 [+] [orf19.6871, orf19.6869, orf19.6868, orf19.6872, orf19.6867]

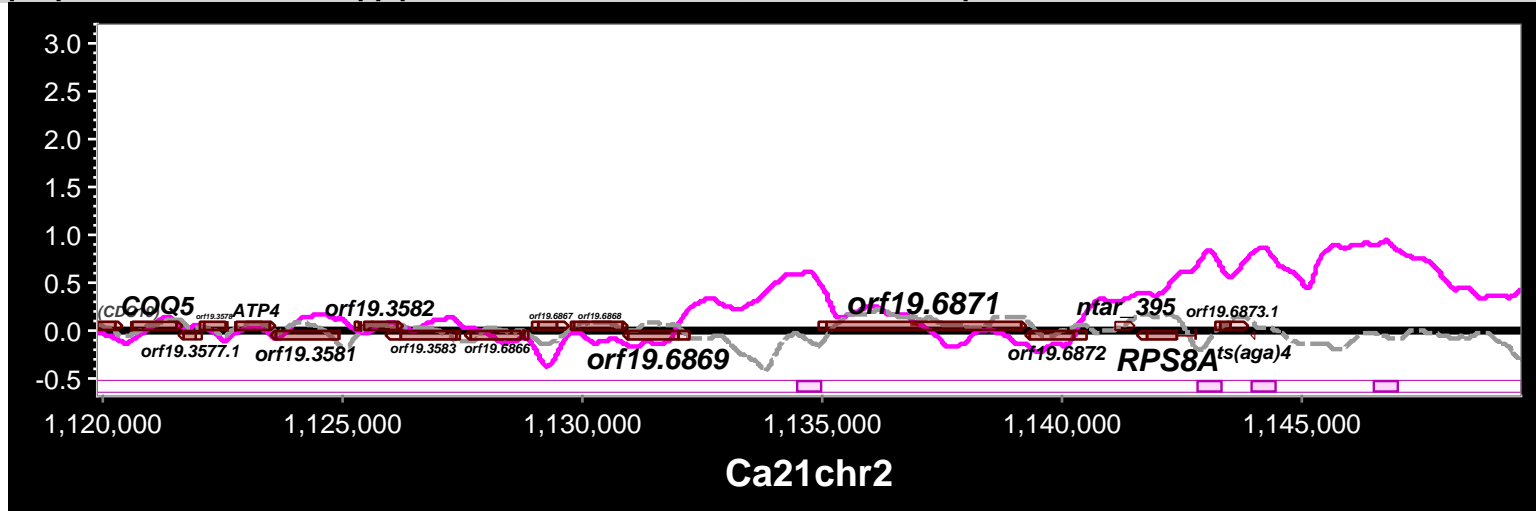

[0.61] Ca21chr3:957033-986716 [+] [STP3, orf19.5917.3, orf19.5915, orf19.5918, MEA1]

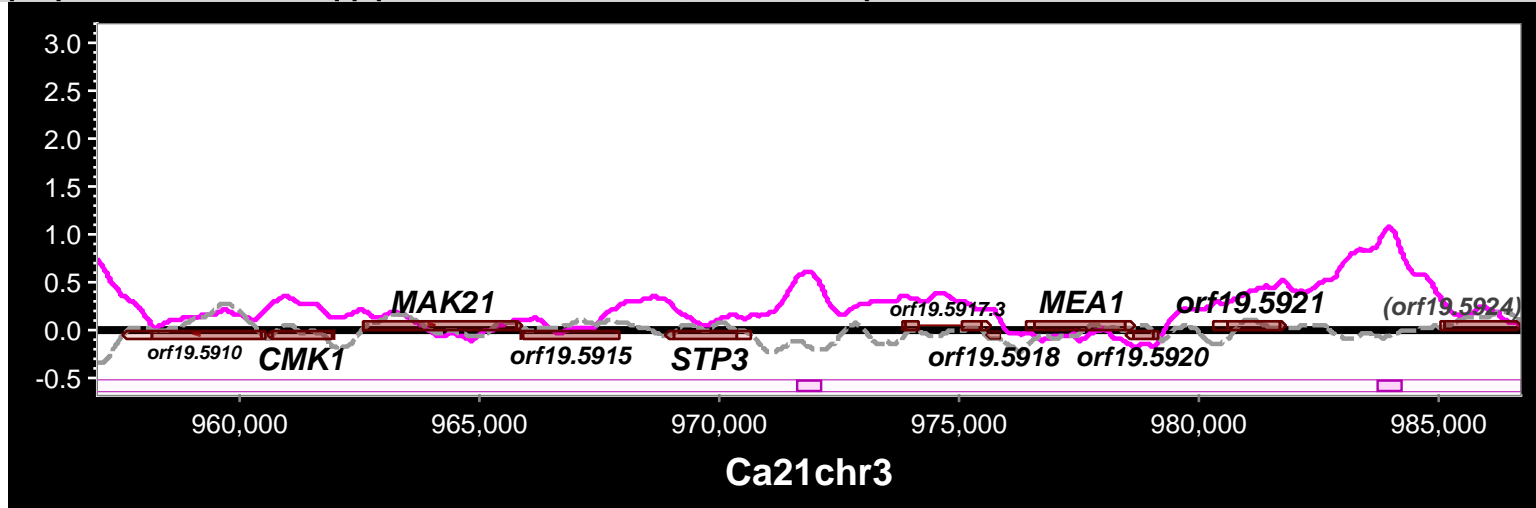

[0.61] Ca21chrR:1183577-1213260 [+] [orf19.6653, DBP8, orf19.5843, orf19.6650, BRF1]

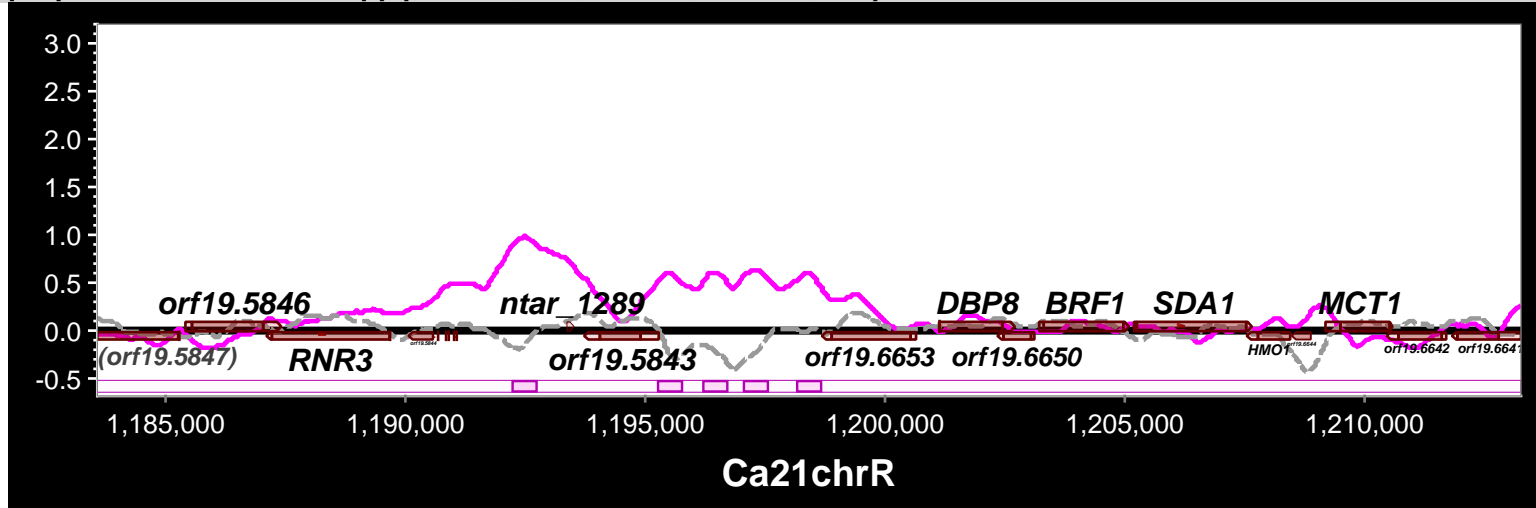

[0.605] Ca21chr2:1324954-1354637 [+] [orf19.35, orf19.34, orf19.35.1, orf19.36, orf19.31]

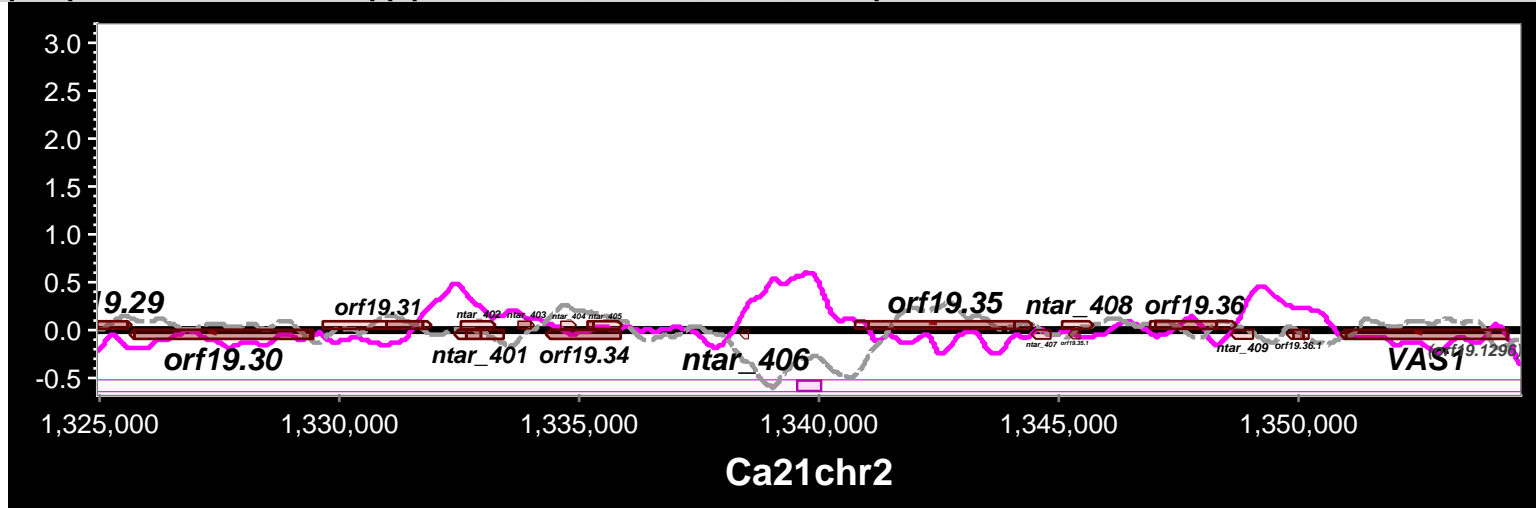

[0.602] Ca21chr1:650587-680270 [+] [ECM33, orf19.3010, orf19.3009, ARO80, COQ4]

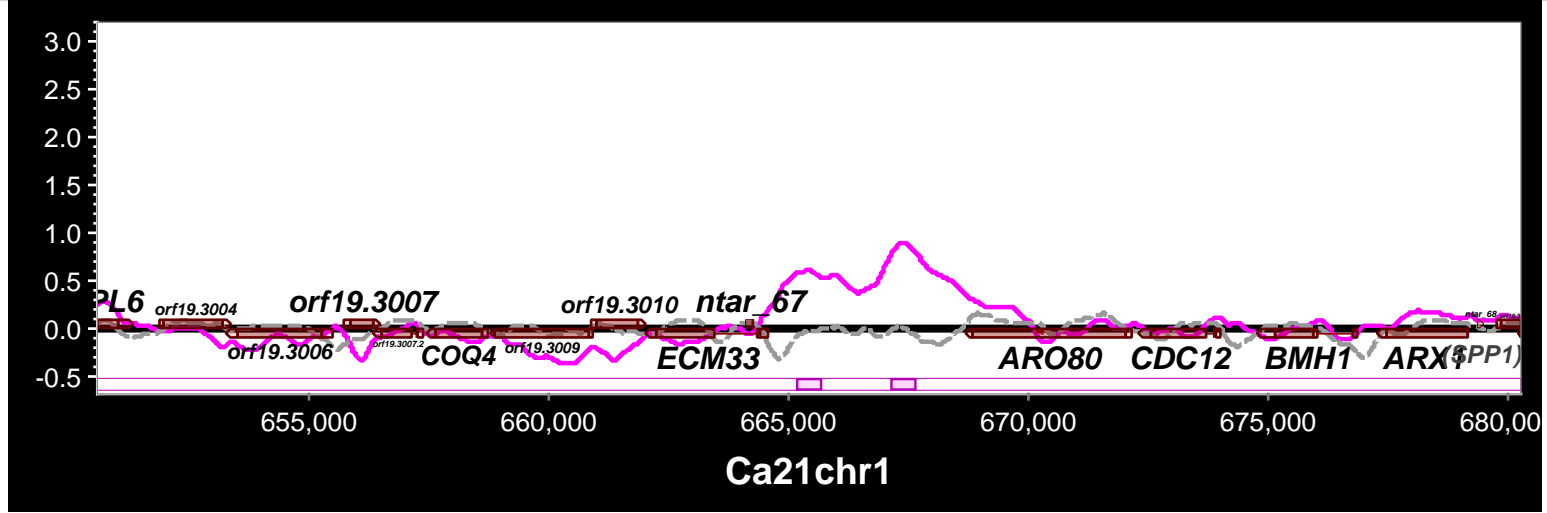

[0.602] Ca21chr1:1153505-1183188 [+] [tN(GUU)1, tN(GUU)2, tT(AGU)1, GSL1, orf19.410.3]

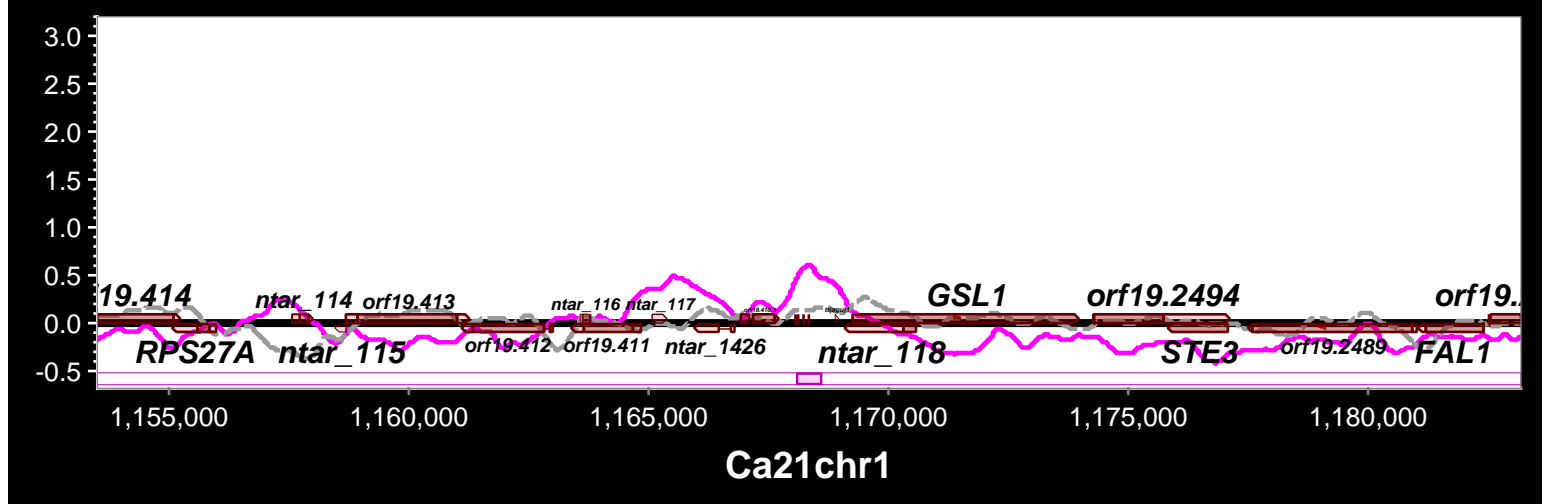

[0.601] Ca21chr1:2280570-2310253 [+] [orf19.4908, orf19.4907, CBK1, RPL42, orf19.4906]

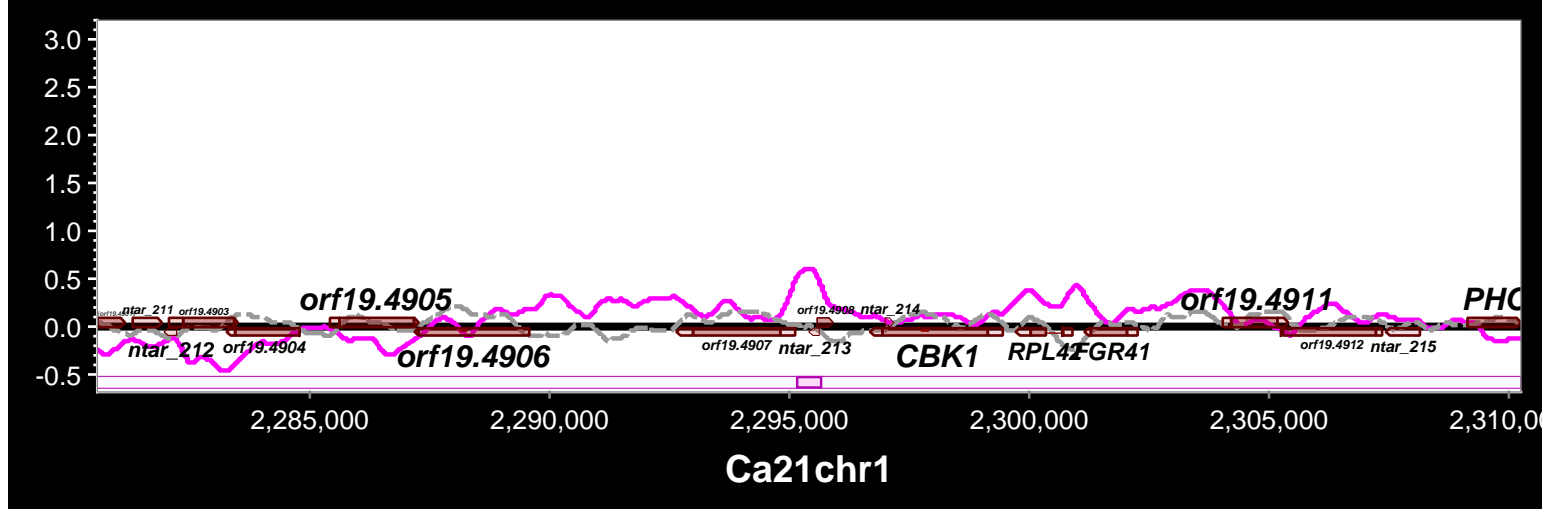

[0.601] Ca21chr5:147853-177536 [+] [IFF8, SPE2, TFB3, RMT2, HYR3]

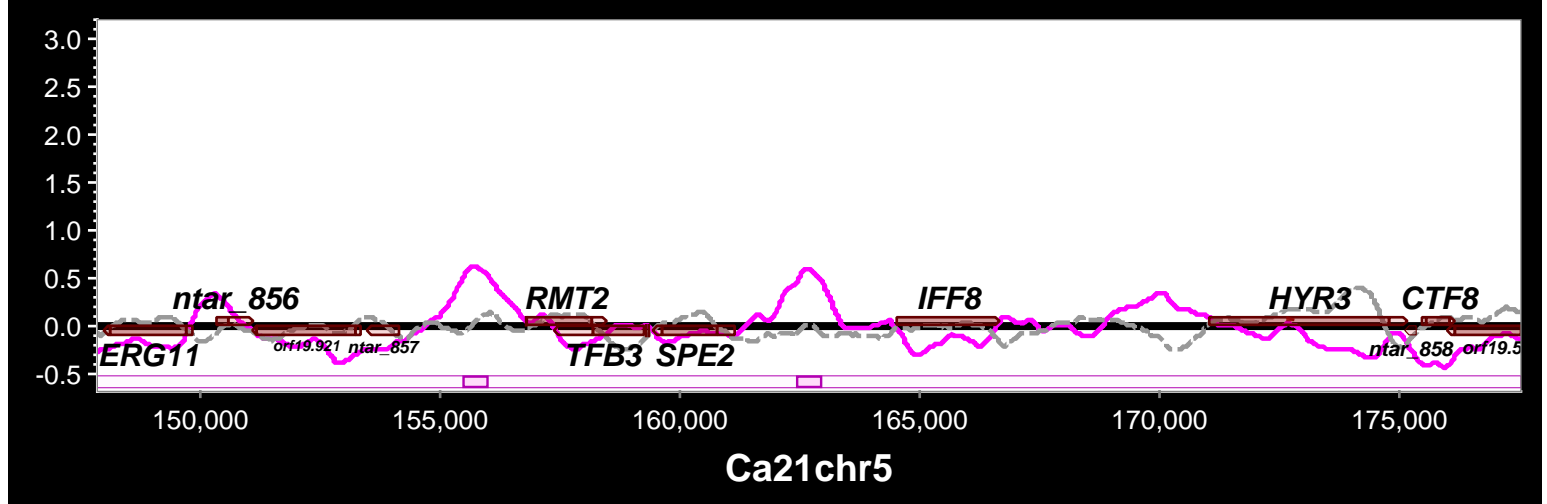

[0.6] Ca21chr1:2505522-2535205 [+] [DPP1, PHO84, SAM2, orf19.1171, GIN1]

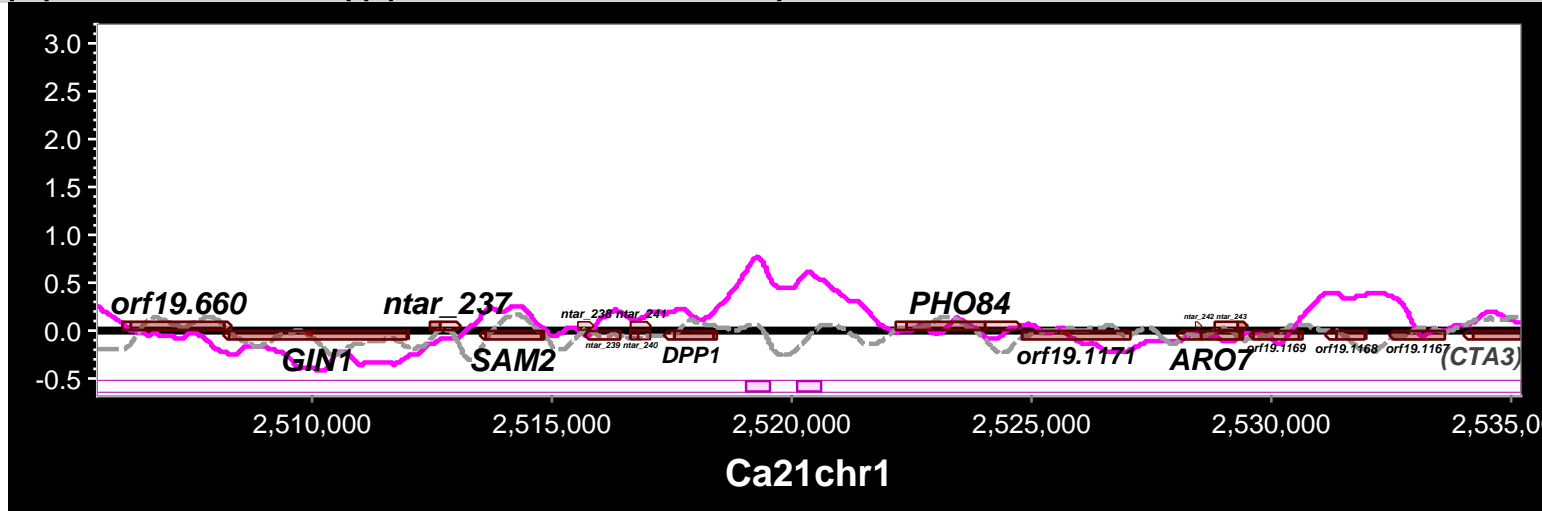

[0.6] Ca21chr1:3026008-3055691 [+] [PDX1, orf19.5022, orf19.5020, DAL7, orf19.5019]

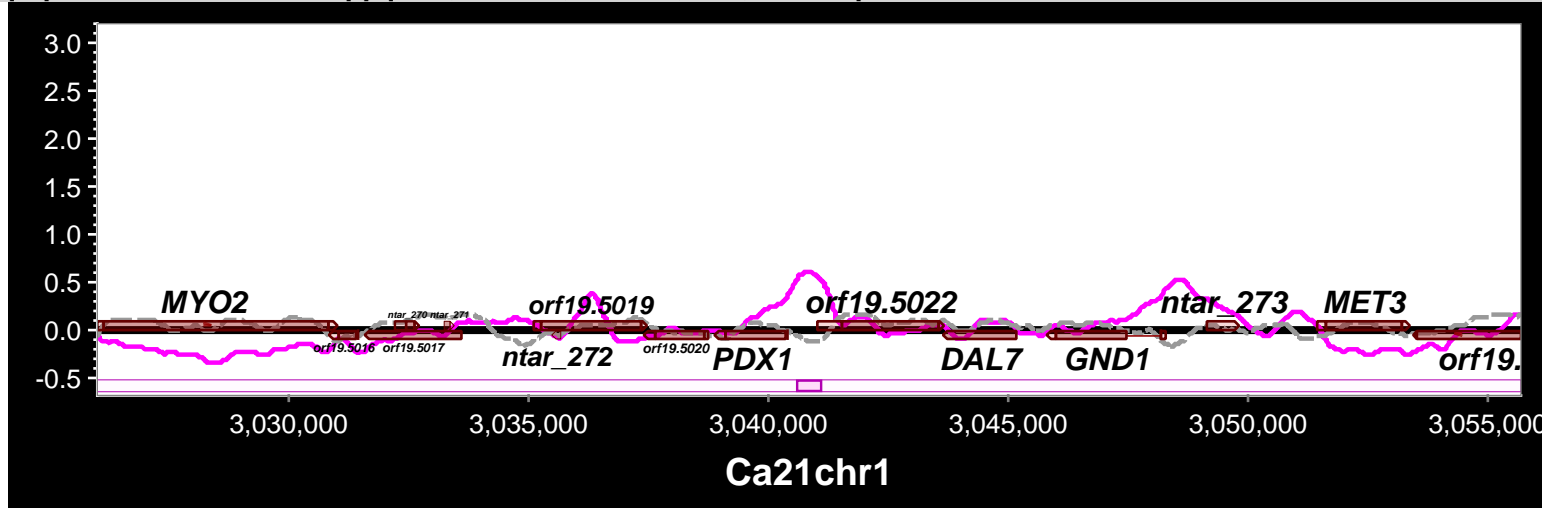

[0.6] Ca21chr5:514491-544174 [+] [orf19.4246, orf19.4245, orf19.4247, orf19.4248, orf19.4244]

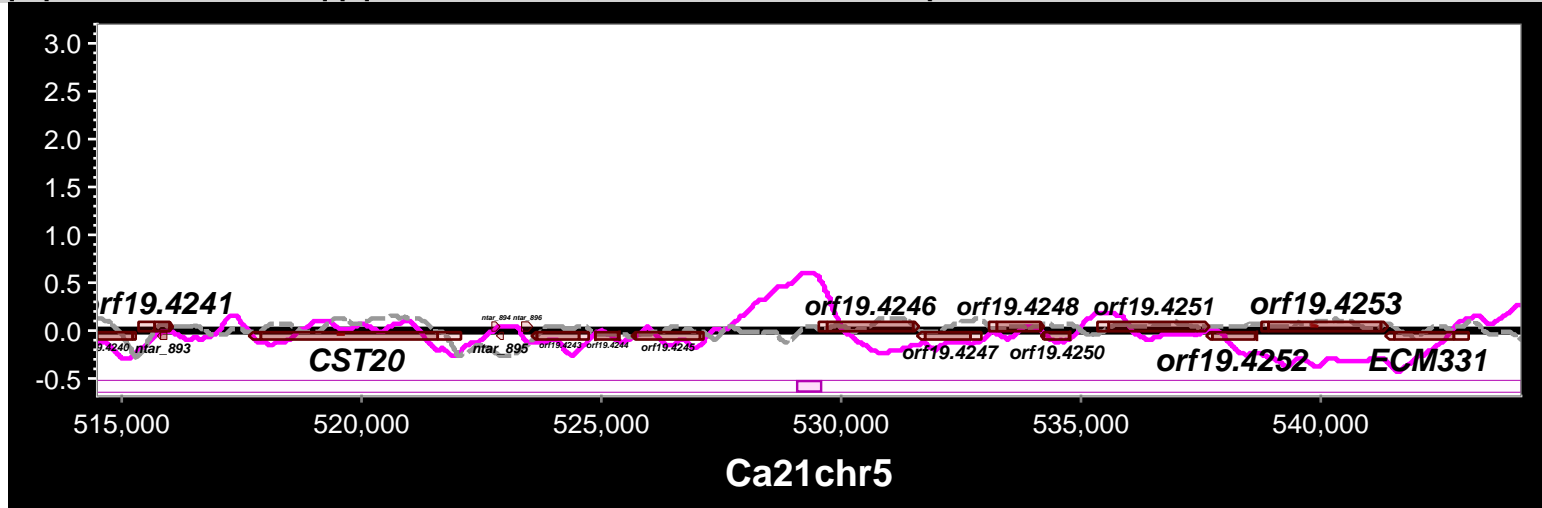

[0.6] Ca21chr5:775401-805084 [+] [orf19.6661, orf19.6660, orf19.6662, RPS25B, orf19.6665]

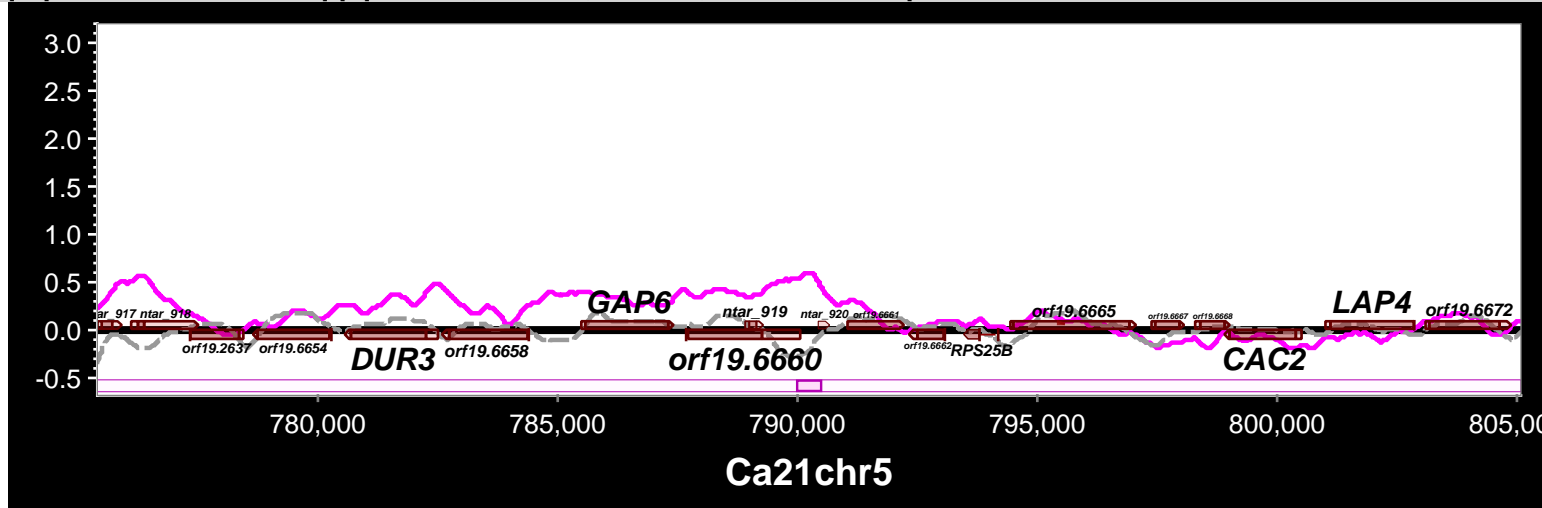

[0.6] Ca21chrR:1180677-1210360 [+] [orf19.5843, tC(GCA)1, tC(GCA)2, orf19.5844, orf19.6653]

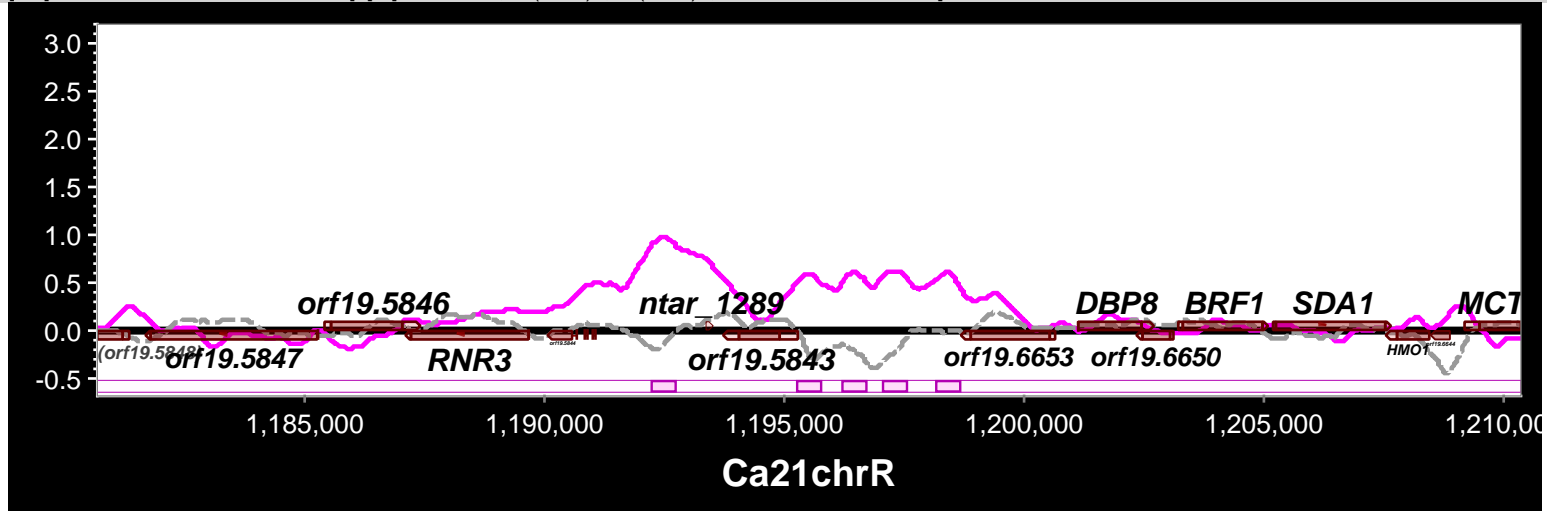

[0.6] Ca21chrR:1640096-1669779 [+] [orf19.6288, AAT21, RPS27, orf19.6291, orf19.6286]

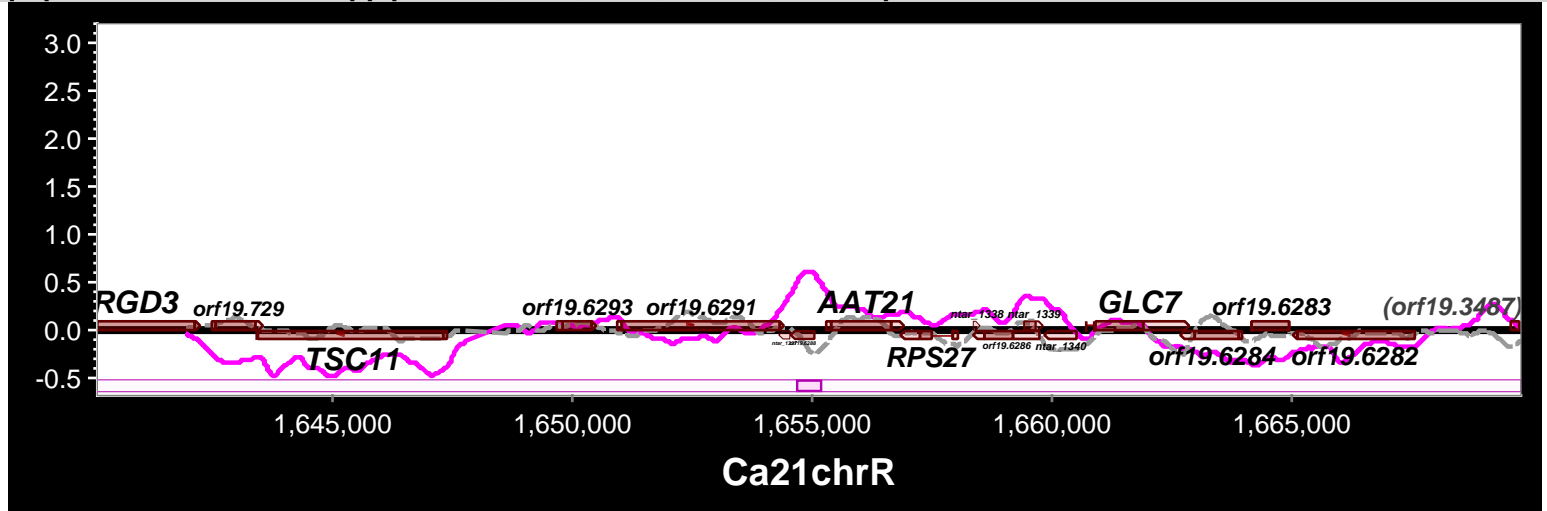

[0.595] Ca21chr7:709974-739657 [+] [LIP8, RBR3, orf19.1344, orf19.5125, orf19.1343]

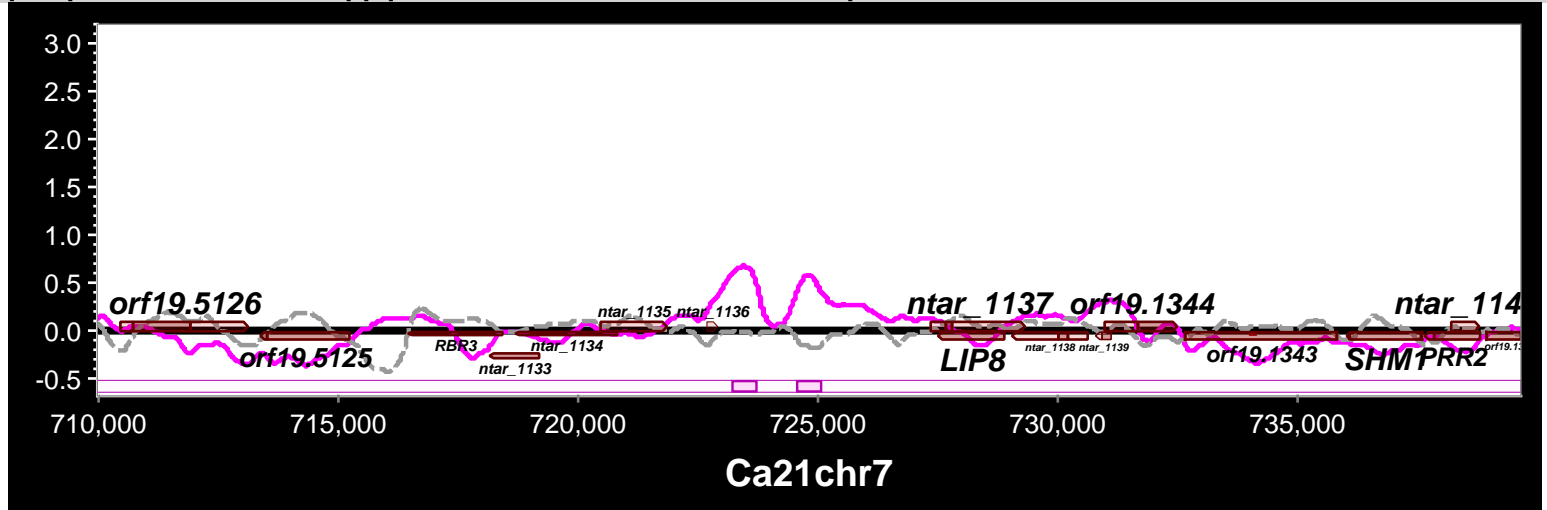

[0.594] Ca21chr5:62097-91780 [+] [orf19.948, orf19.949, MRP17, MET14, VPS2]

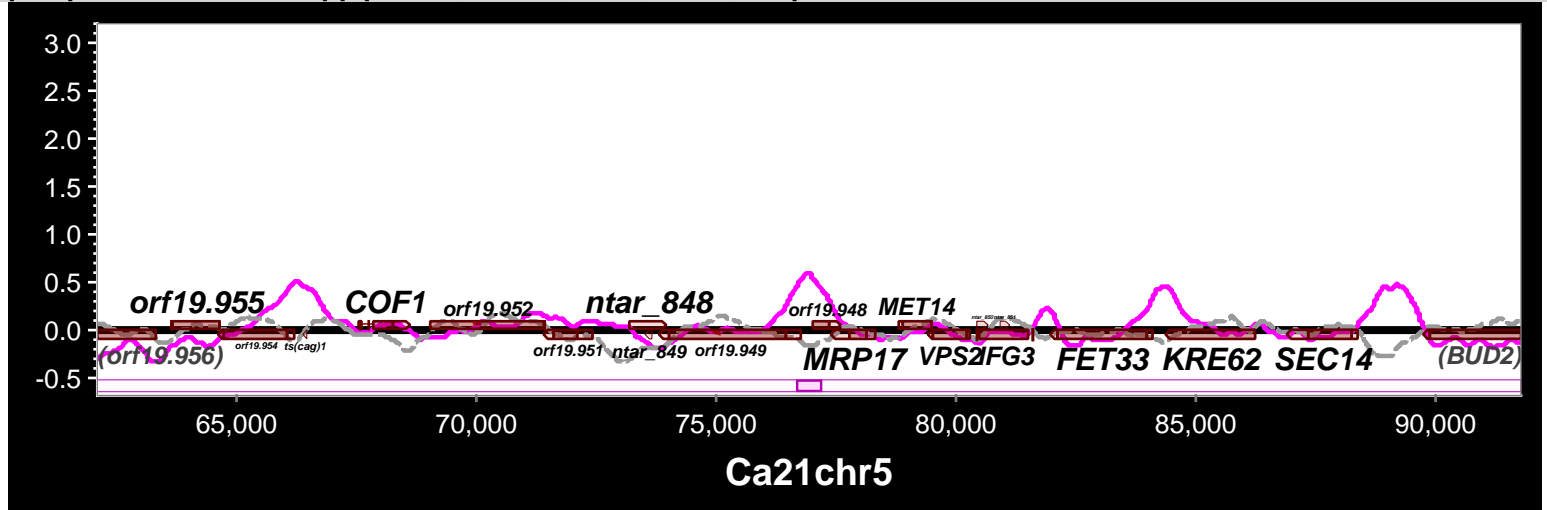

[0.592] Ca21chr1:18926-48609 [+] [orf19.6084, orf19.6083, orf19.6082, RPL16A, LEU4]

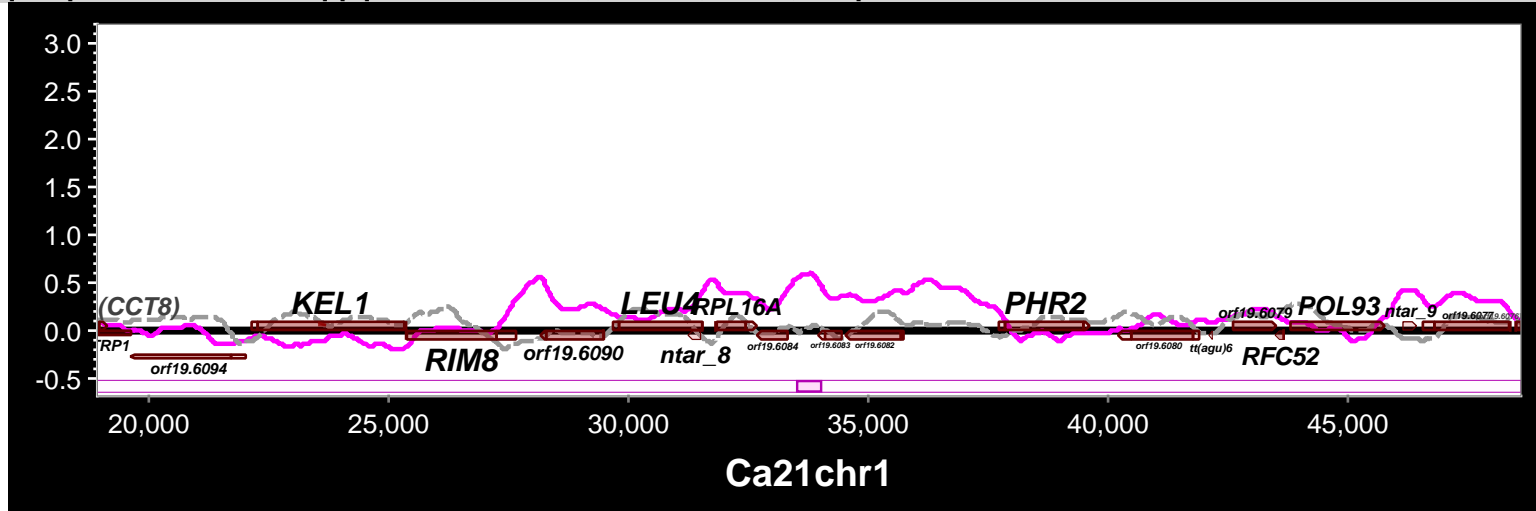

[0.592] Ca21chr1:473860-503543 [+] [tR(CCG)1, orf19.3690.2, orf19.3691, orf19.3689, PGA5]

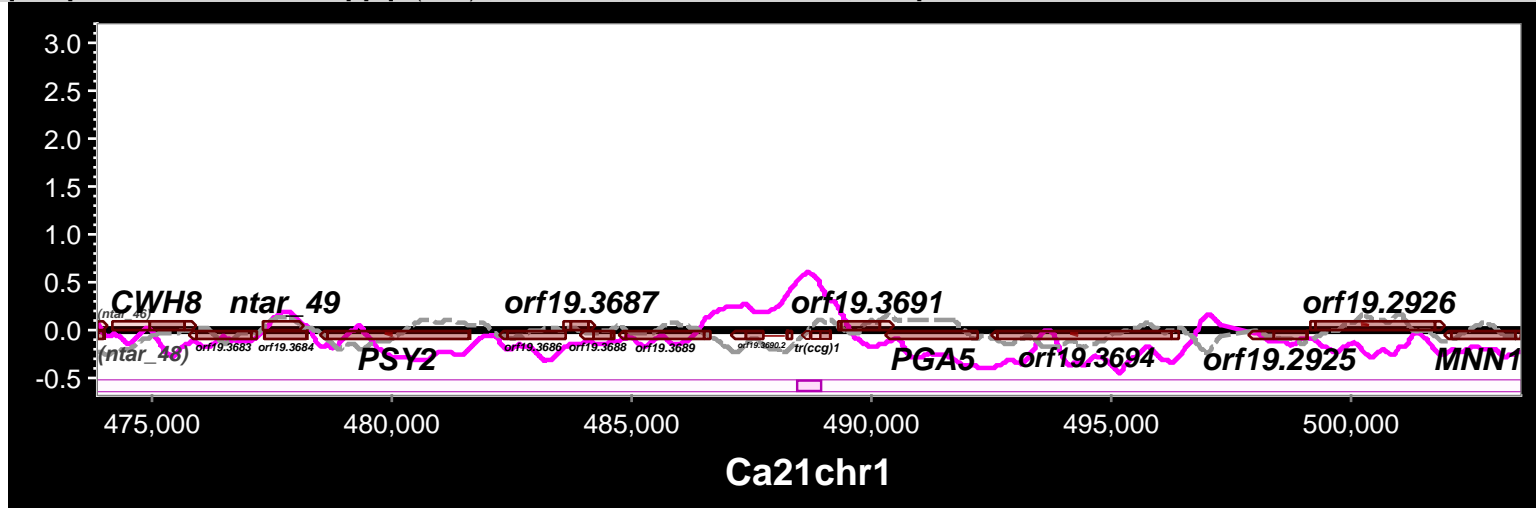

[0.592] Ca21chr1:2299866-2329549 [+] [GLY1, orf19.988, orf19.985, orf19.989, DJP1]

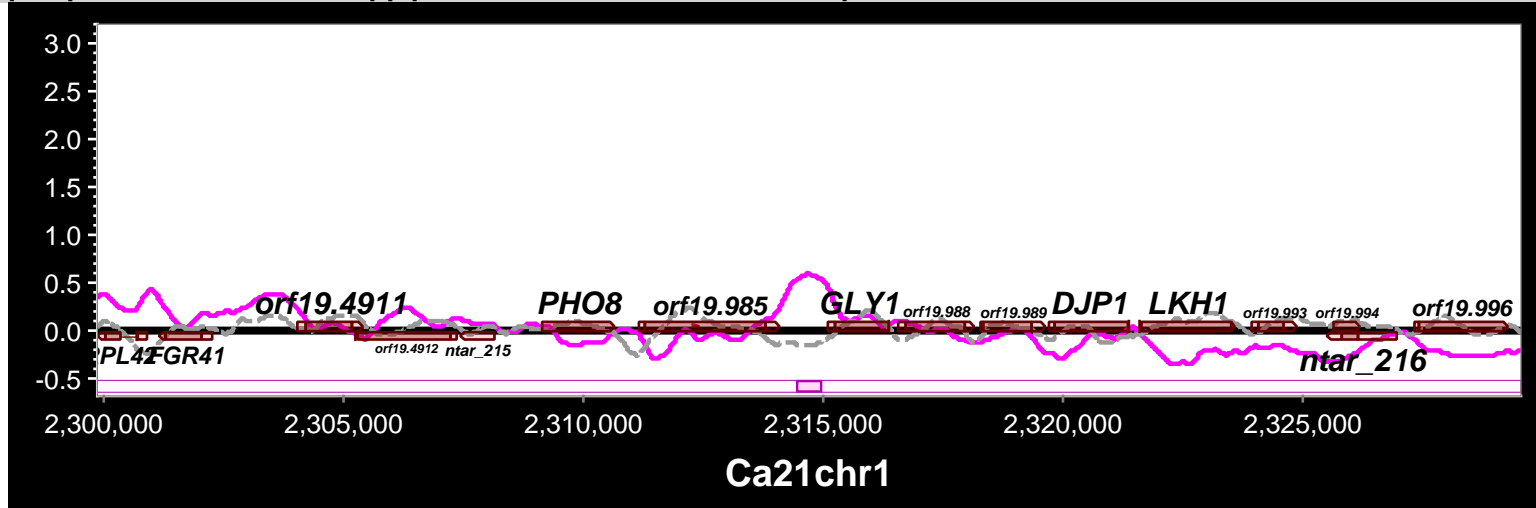

[0.592] Ca21chr6:416270-445953 [+] [orf19.3501, orf19.3499, RPL23A, orf19.3498, orf19.3503]

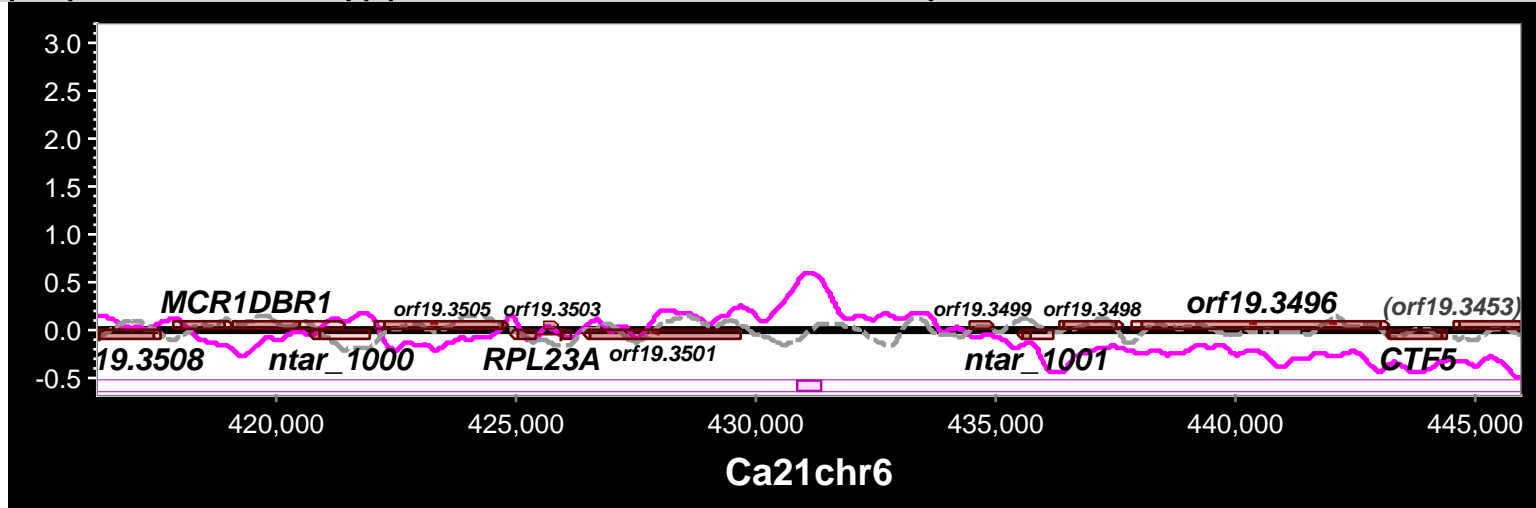

[0.591] Ca21chr5:235831-265514 [+] [orf19.1959, CLN3, CYC3, orf19.1961, orf19.1956]

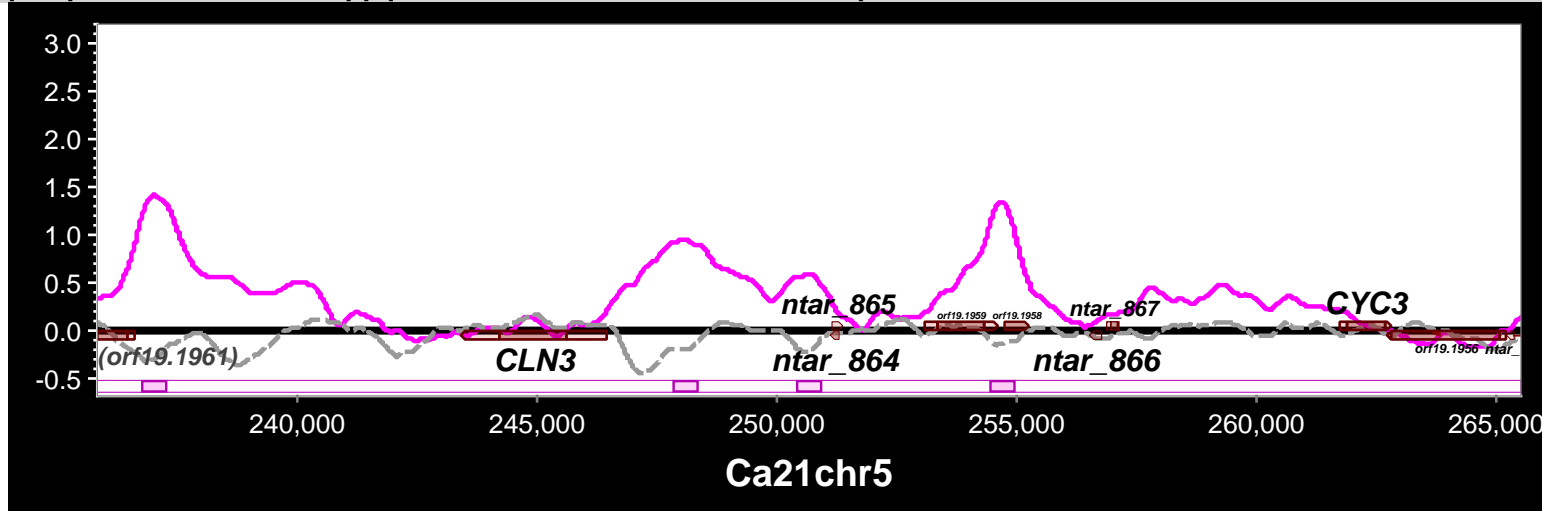

[0.59] Ca21chr1:1272205-1301888 [+] [orf19.2431, HAC1, orf19.2430, orf19.2429, orf19.2433]

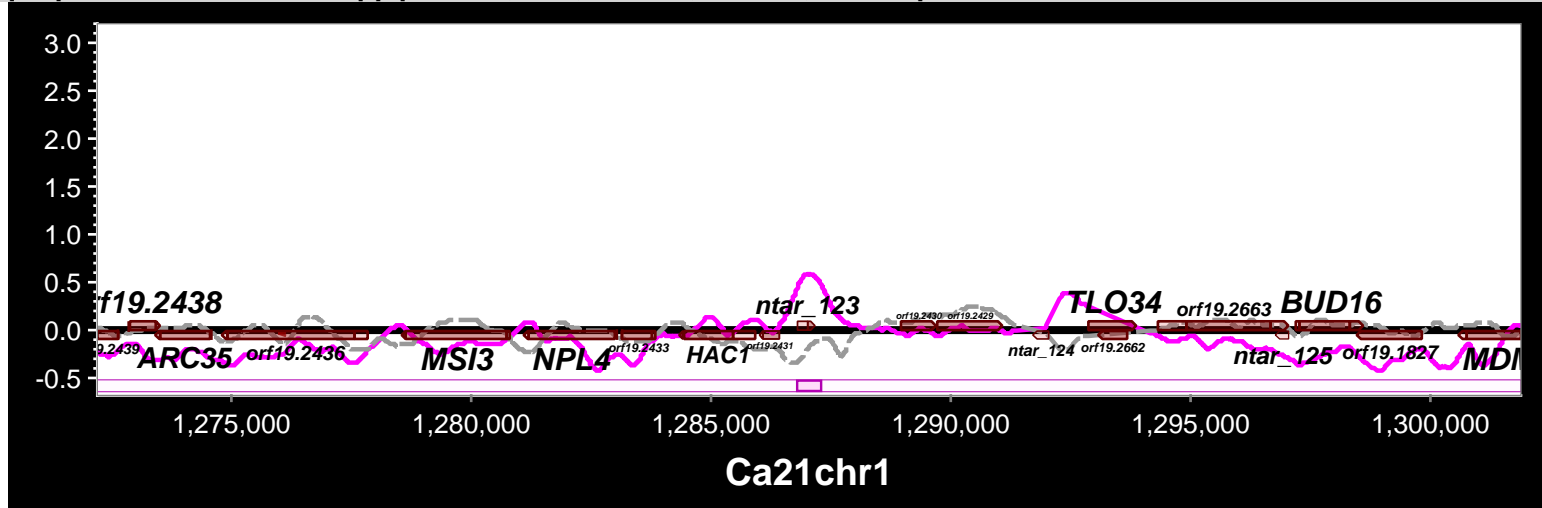

[0.59] Ca21chr1:2038758-2068441 [+] [orf19.4793, orf19.4792, orf19.4791, orf19.4795, orf19.4796]

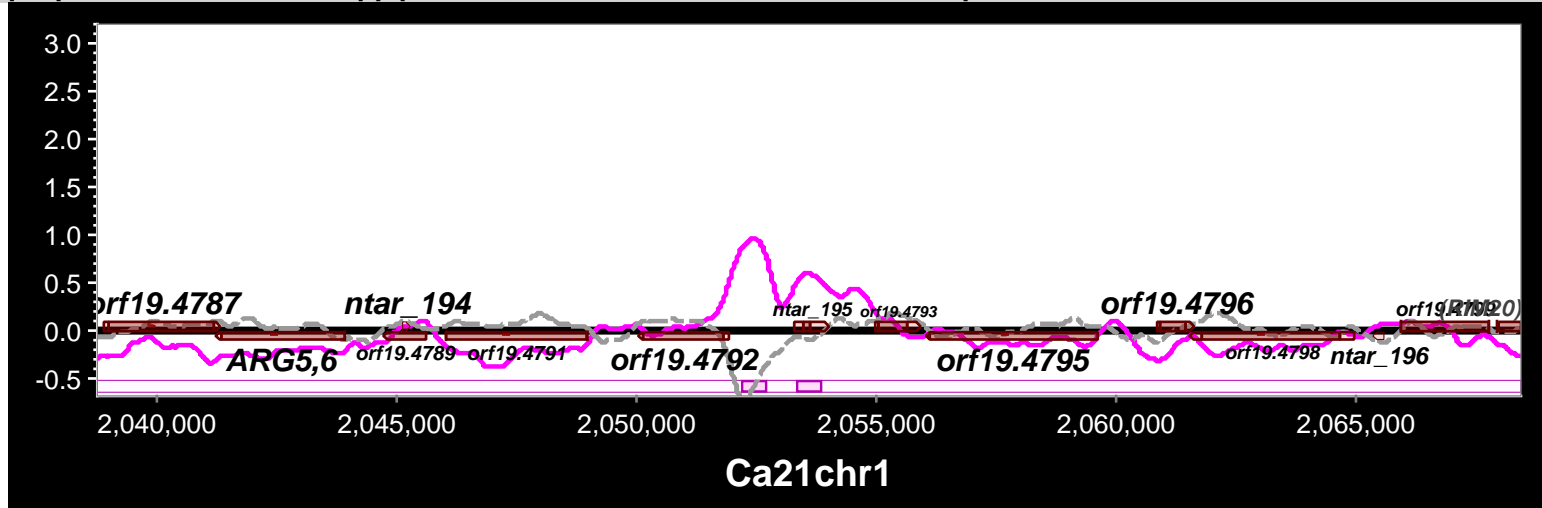

[0.59] Ca21chr1:2928320-2958003 [+] [HYR1, orf19.4972, orf19.4976, KNS1, orf19.4970]

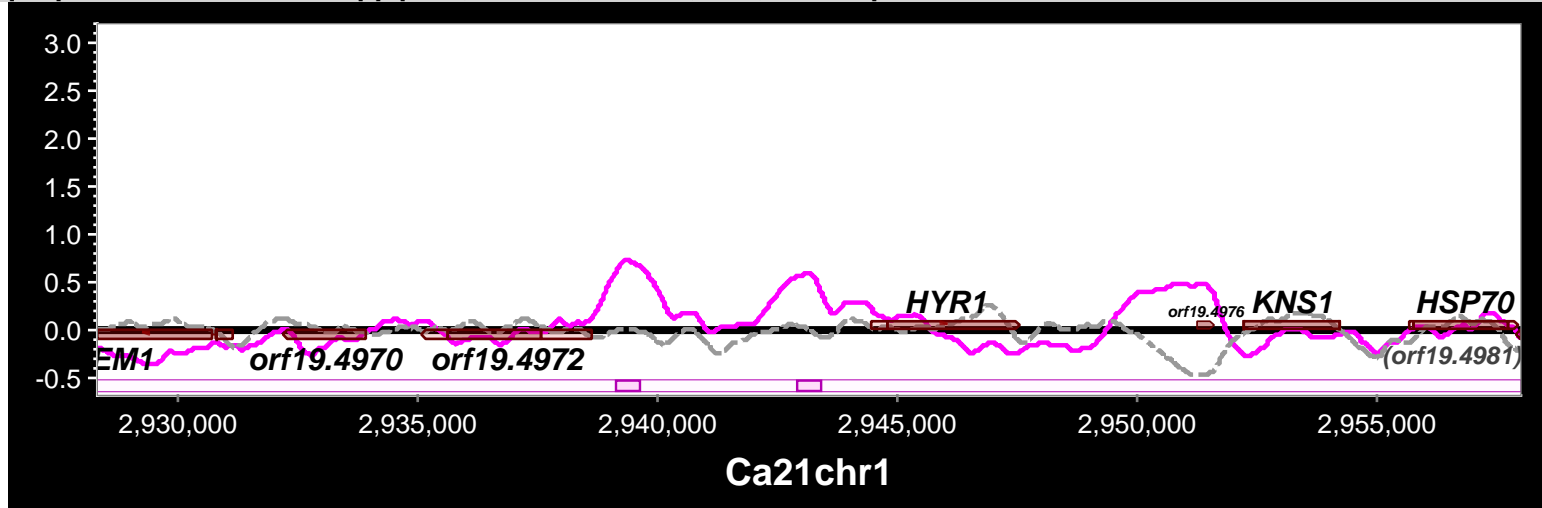



[0.59] Ca21chr2:734716-764399 [+] [RAD32, orf19.867, orf19.864, orf19.863, ADAEC]

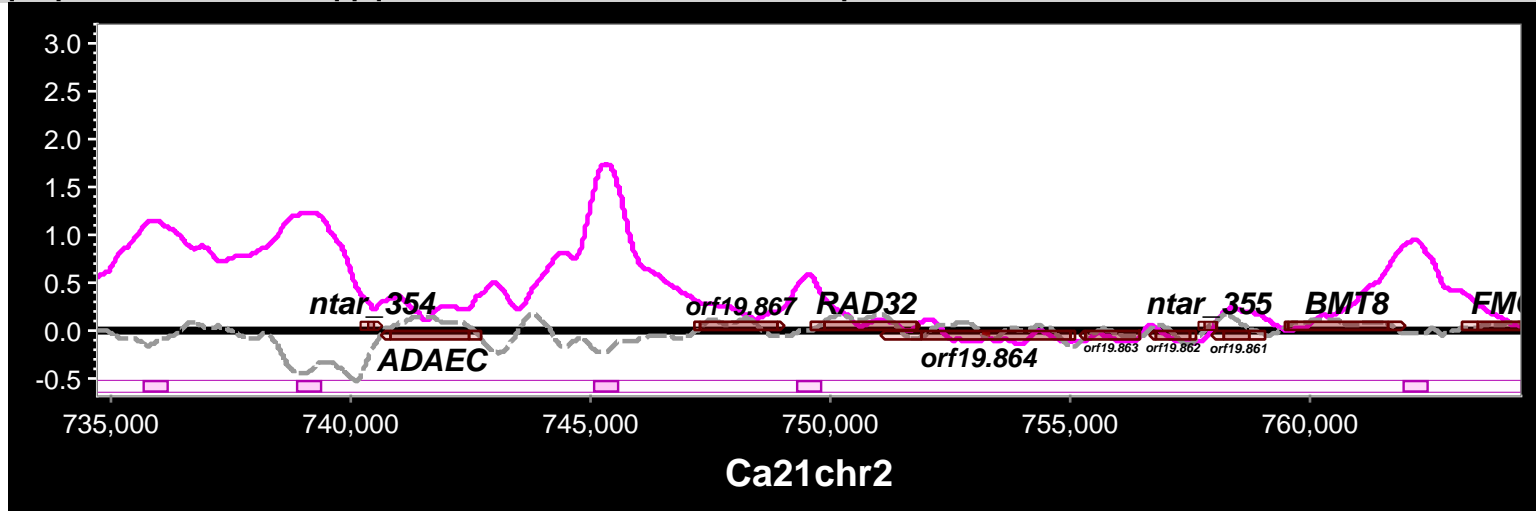

[0.59] Ca21chr2:1792905-1822588 [+] [BUD20, orf19.217, orf19.216.1, PIR1, orf19.216]

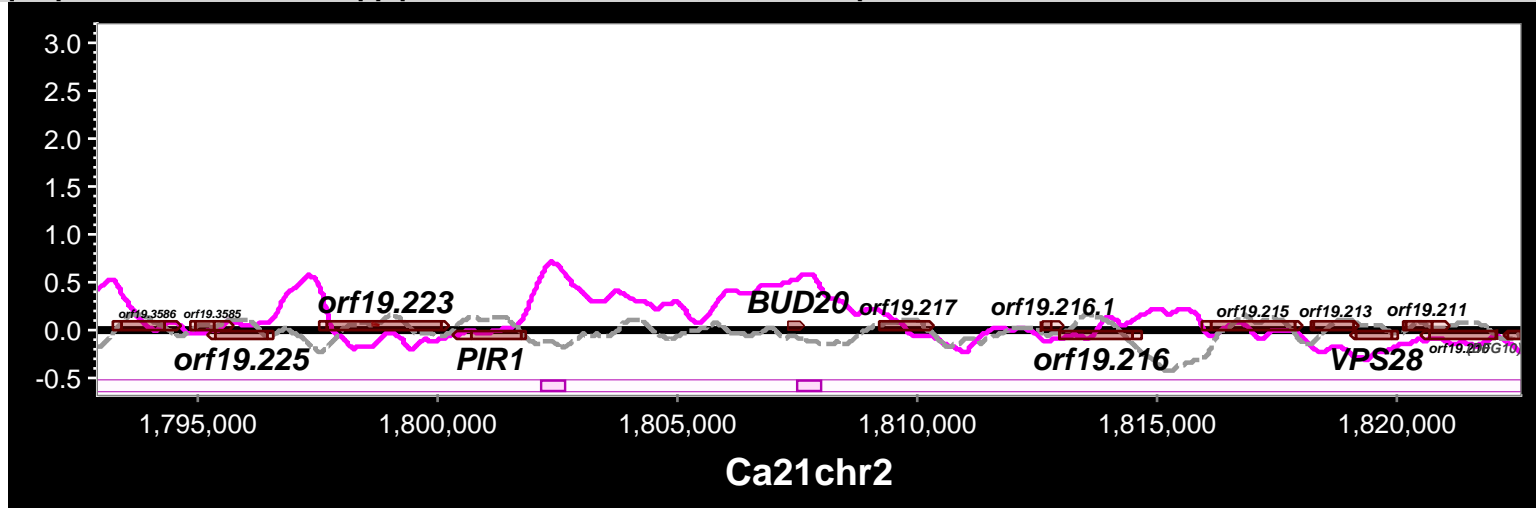

[0.59] Ca21chr4:1026952-1056635 [+] [AGP3, CSR1, orf19.3796, orf19.3797, orf19.3798]

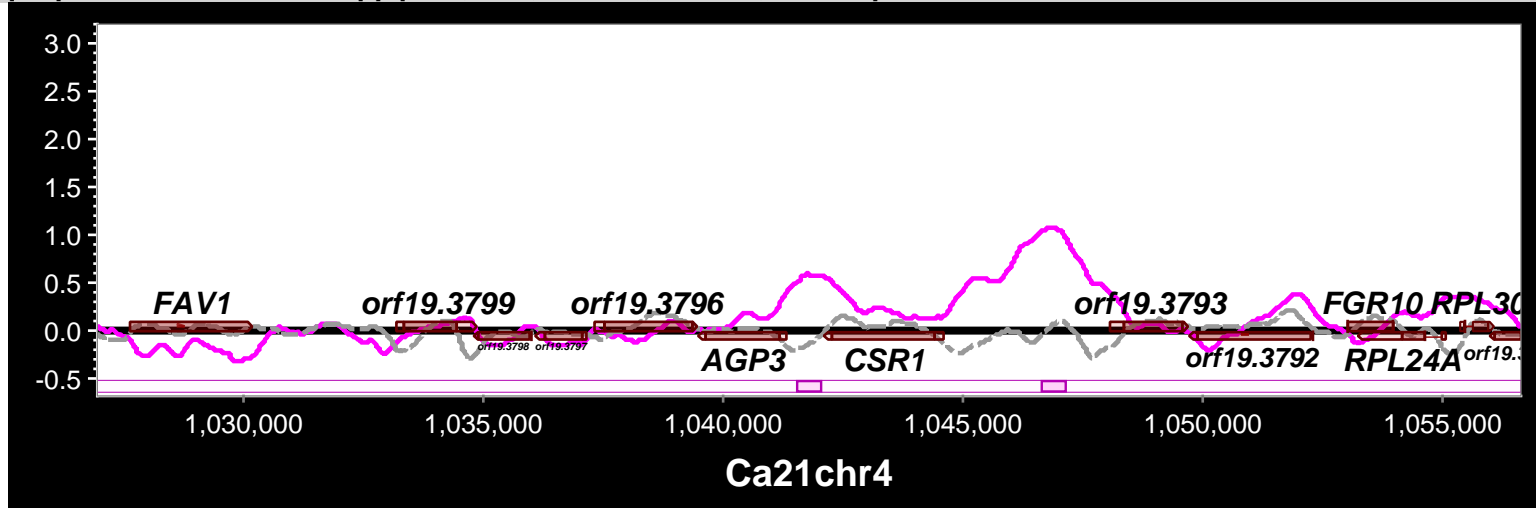

[0.59] Ca21chr4:1087841-1117524 [+] [orf19.741, HAP41, ALD6, MYO5, GDB1]

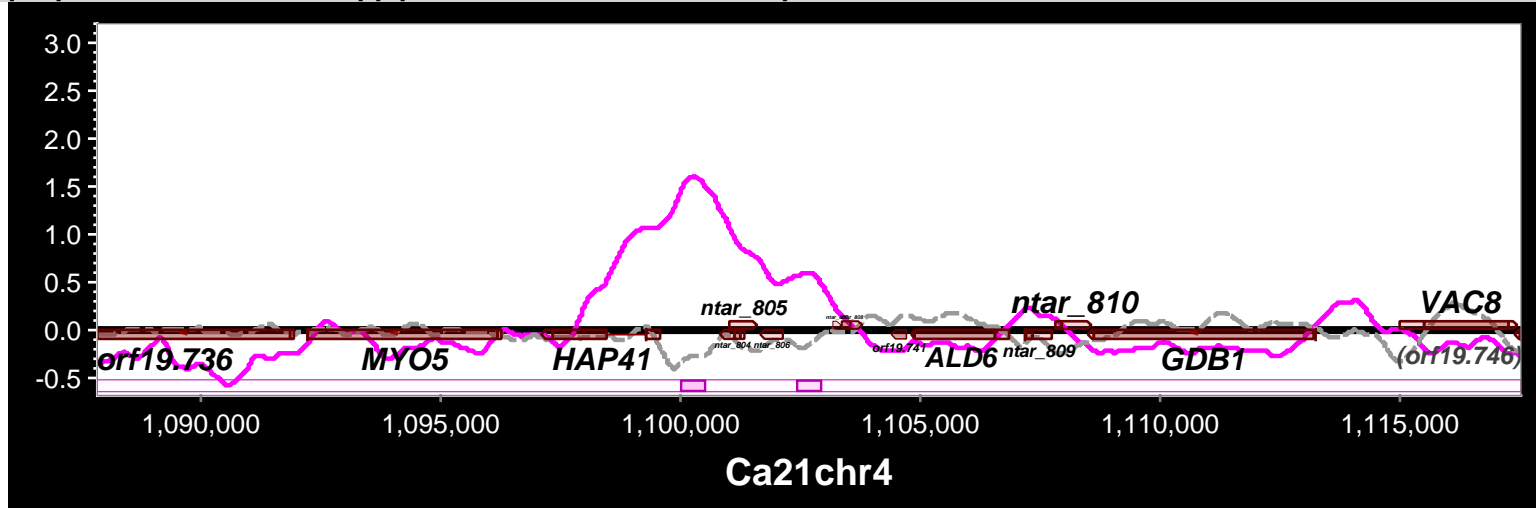

[0.59] Ca21chr6:148441-178124 [+] [CAN3, GPX2, orf19.86, SUN41, GPX1]

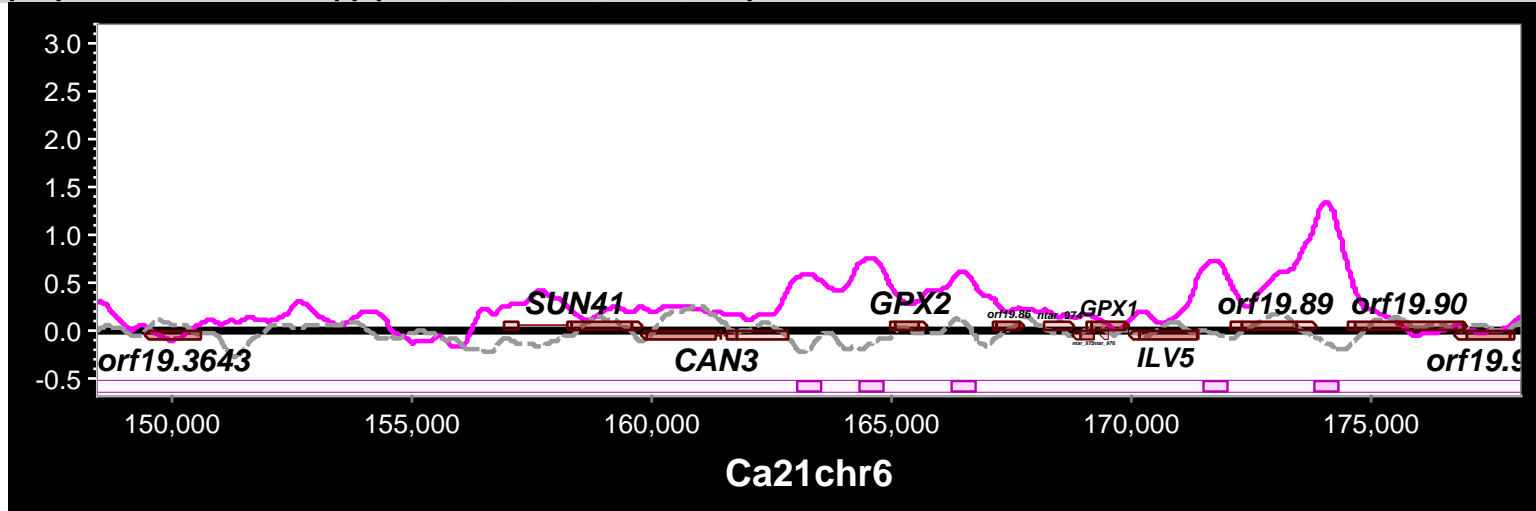

[0.59] Ca21chr6:341946-371629 [+] [RPL32, ACF2, orf19.3418, PTK2, MAE1]

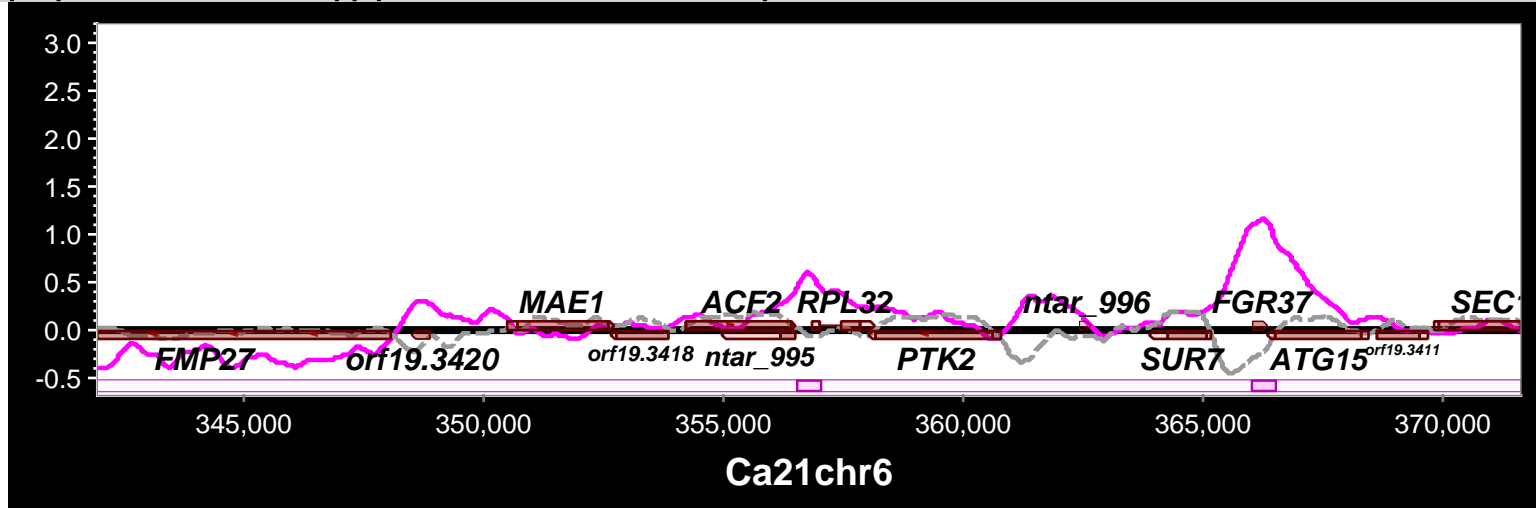

[0.584] Ca21chr1:2149465-2179148 [+] [tS(CGA)1, BUD31, LIP3, HCM1, orf19.4857]

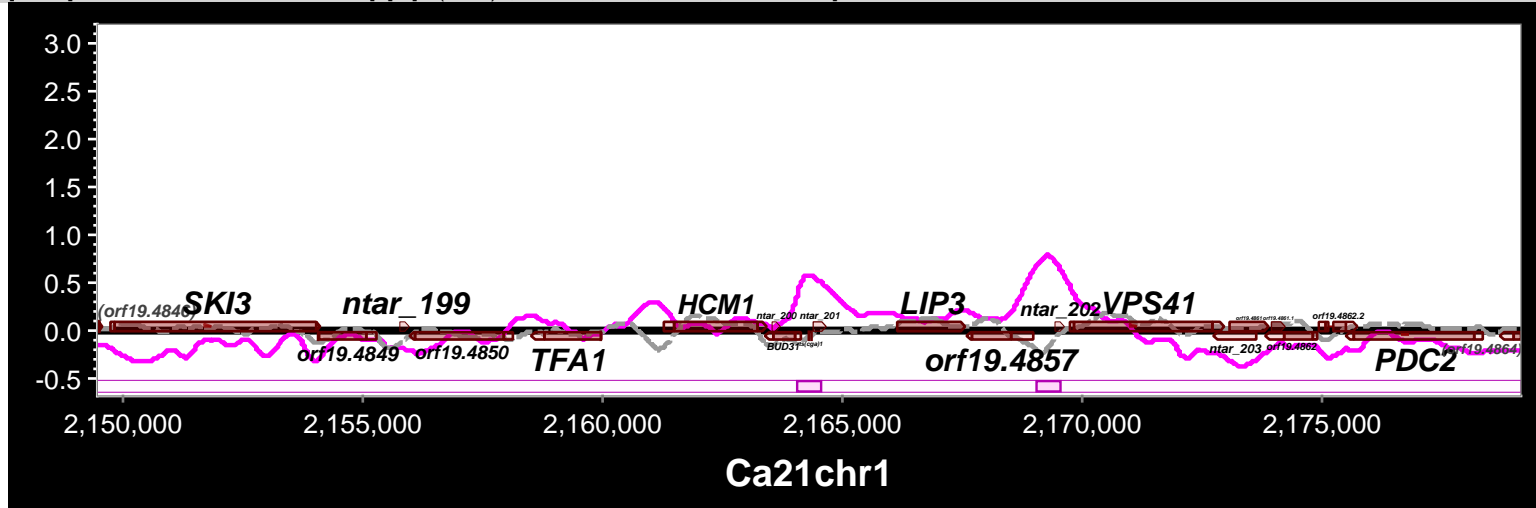

[0.583] Ca21chr6:722409-752092 [+] [orf19.5711, YMX6, SAP1, orf19.5710, NAM2]

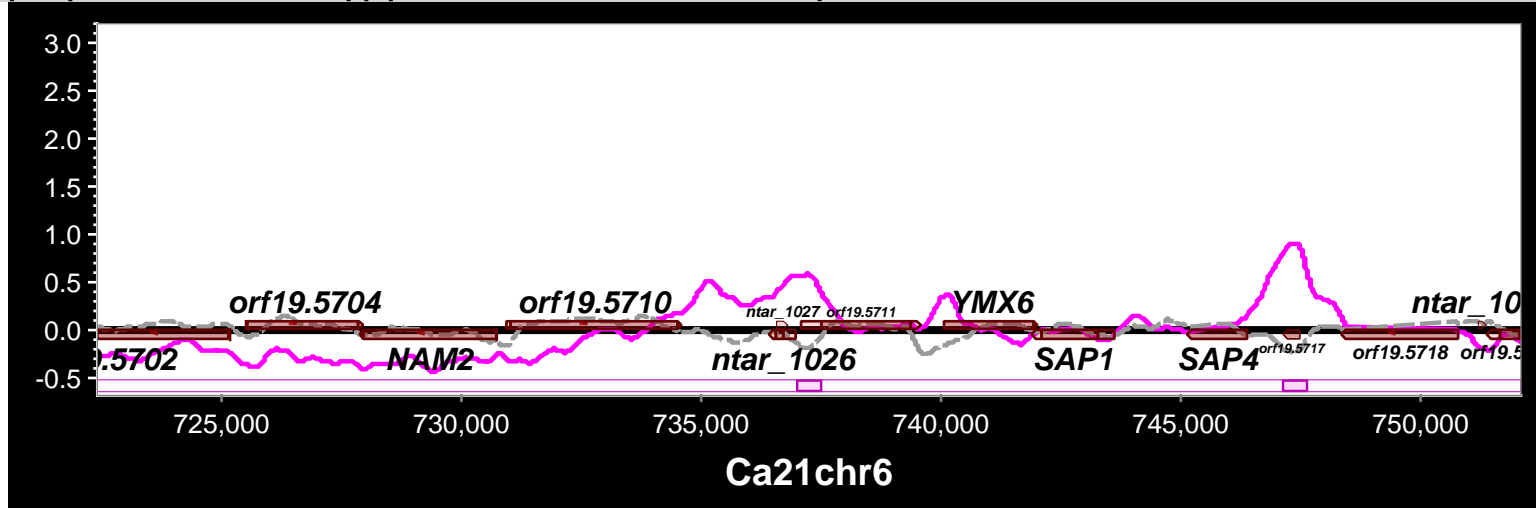

[0.582] Ca21chr1:1557381-1587064 [+] [tL(AAG)2, RME1, orf19.4437, CEN1, orf19.4439]

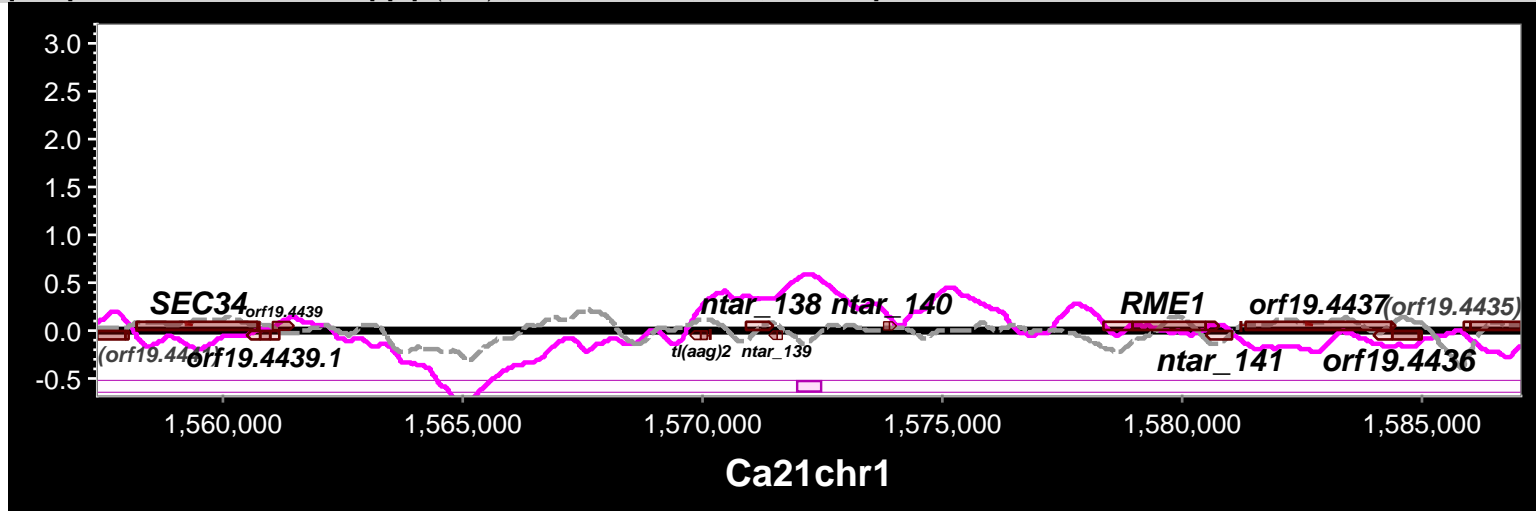

[0.582] Ca21chr1:2117007-2146690 [+] [MLS1, orf19.4831, orf19.4834, orf19.4830, orf19.4835]

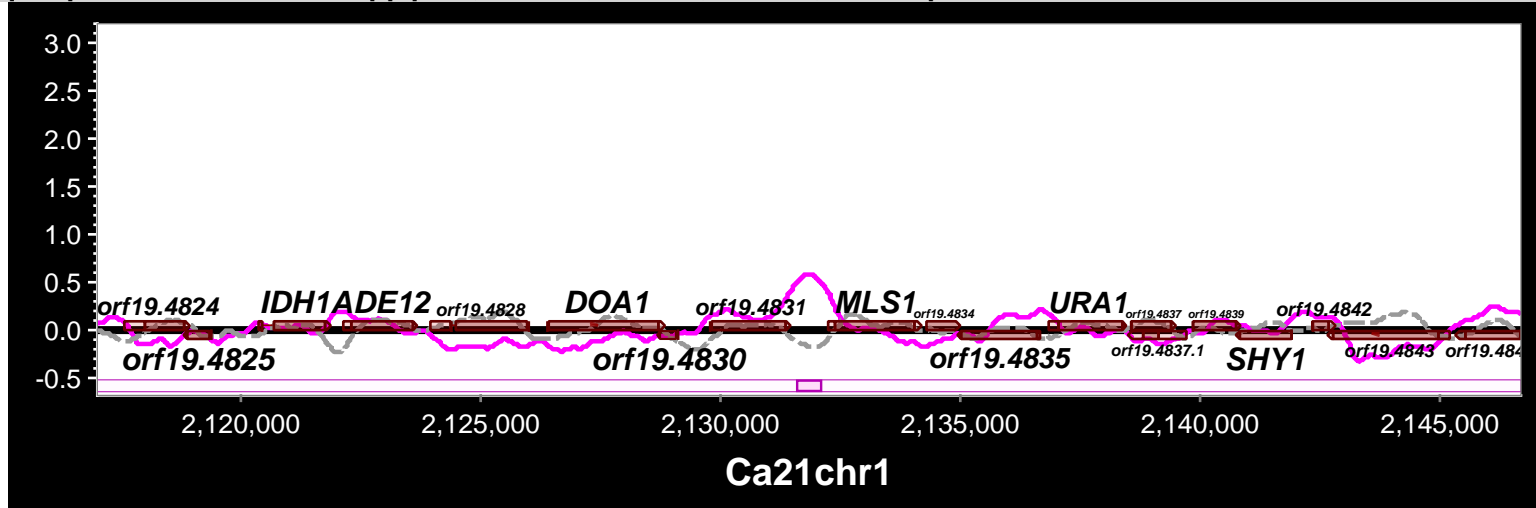

[0.58] Ca21chr1:260310-289993 [+] [orf19.3328, orf19.3329, TRM2, CRL1, RPS21B]

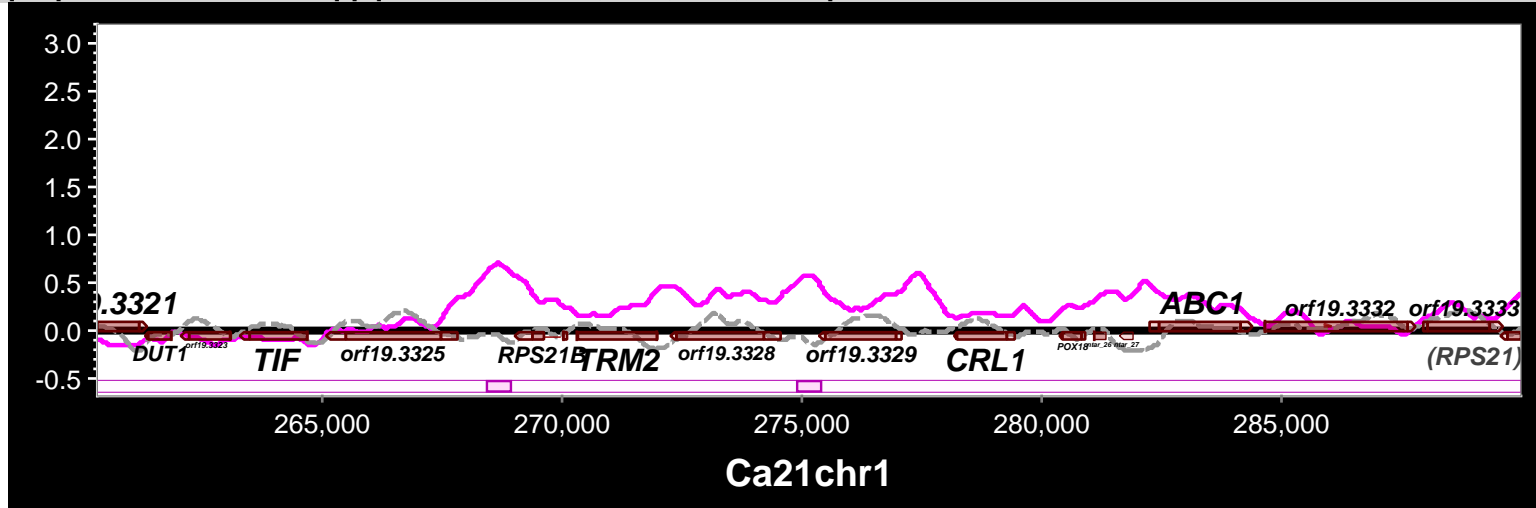

[0.58] Ca21chr1:2260492-2290175 [+] [orf19.4900, GCA1, orf19.4901, orf19.4898, orf19.4897]

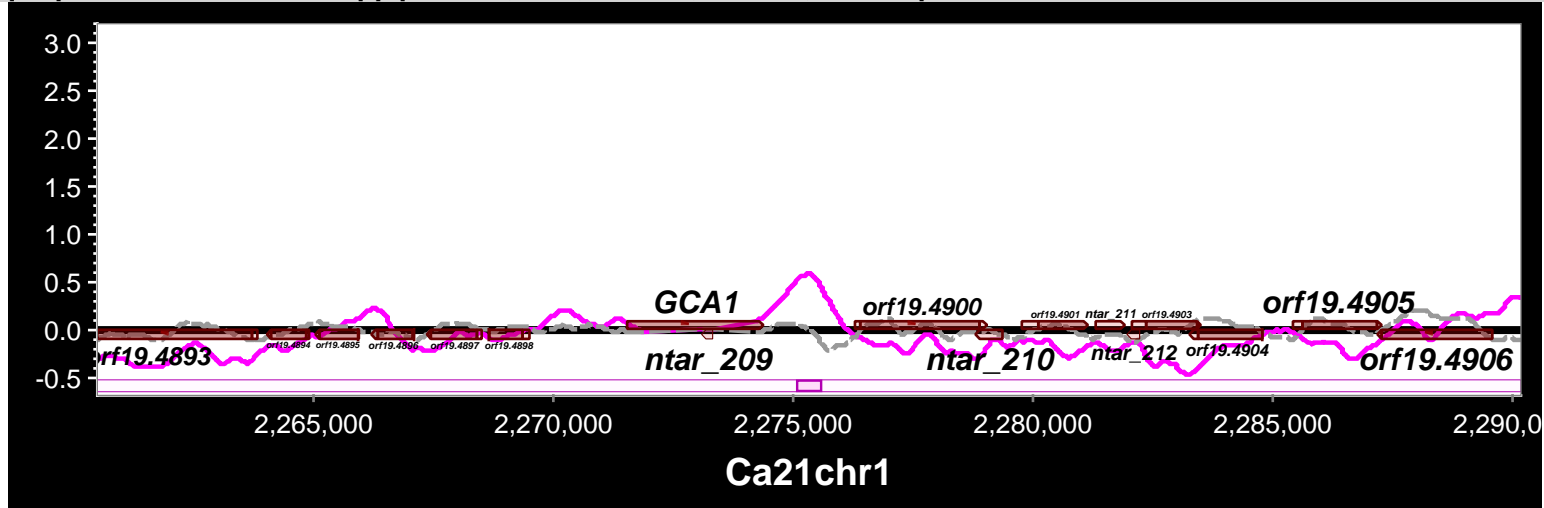

[0.58] Ca21chr3:923829-953512 [+] [RAX1, RAS2, RPL19A, orf19.5905, ADE2]

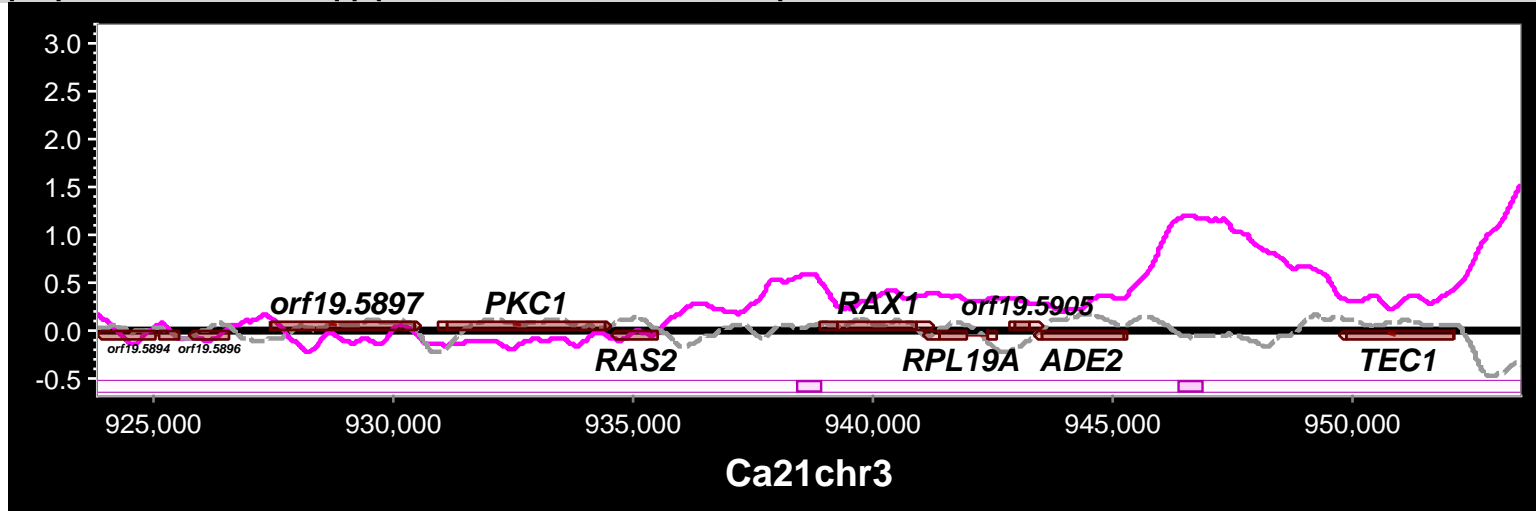

[0.58] Ca21chr3:1715567-1745250 [+] [TCC1, orf19.6732, orf19.6731.1, orf19.6731, orf19.6730]

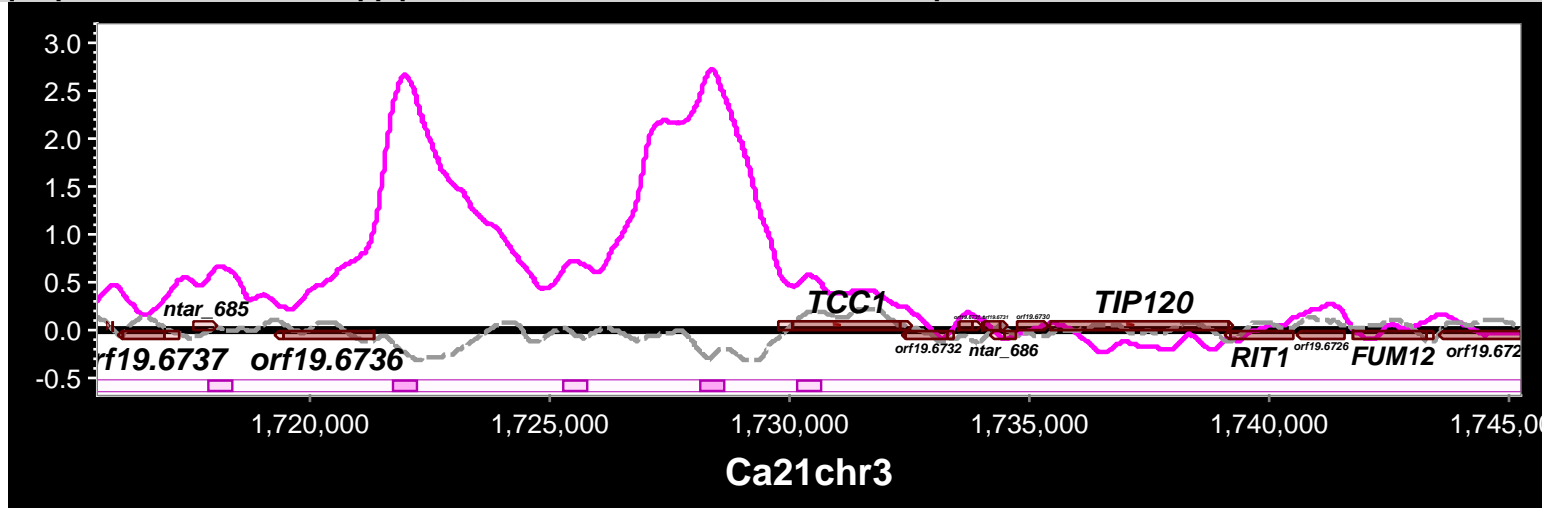

[0.58] Ca21chrR:1676103-1705786 [+] [SAP2, YHB1, YHB5, orf19.3706, PTC6]

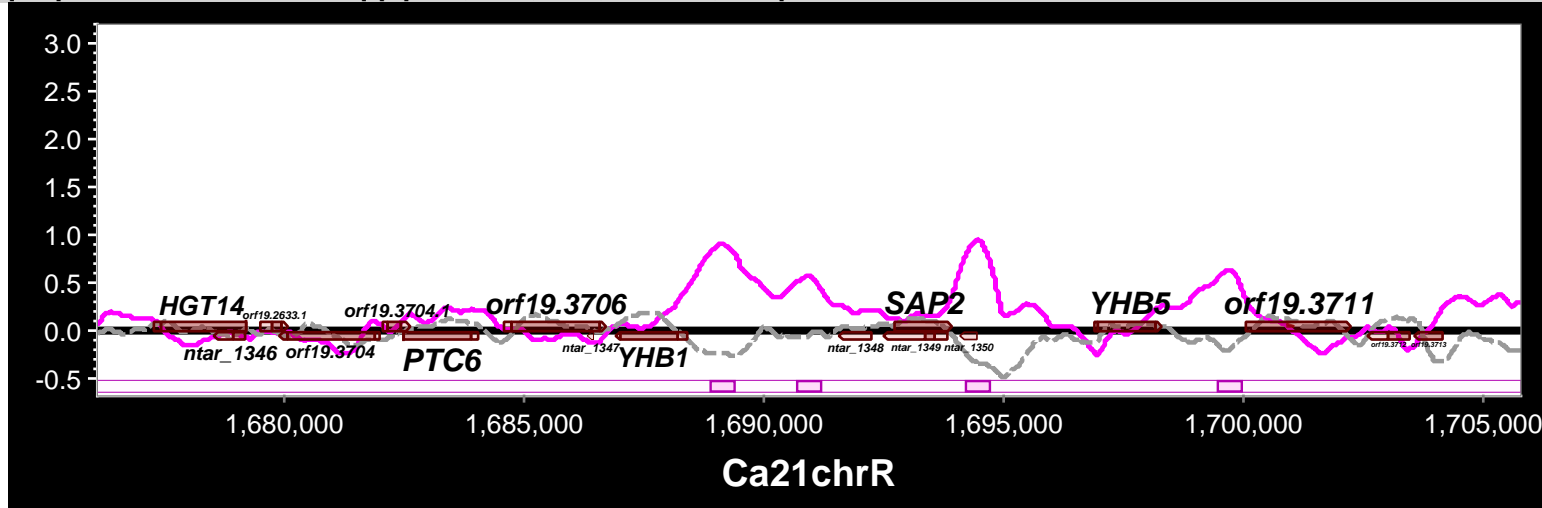

[0.58] Ca21chrR:1772267-1801950 [+] [tk(UUU)3, tk(UUU)4, ACO1, tk(UUU)5, orf19.6382]

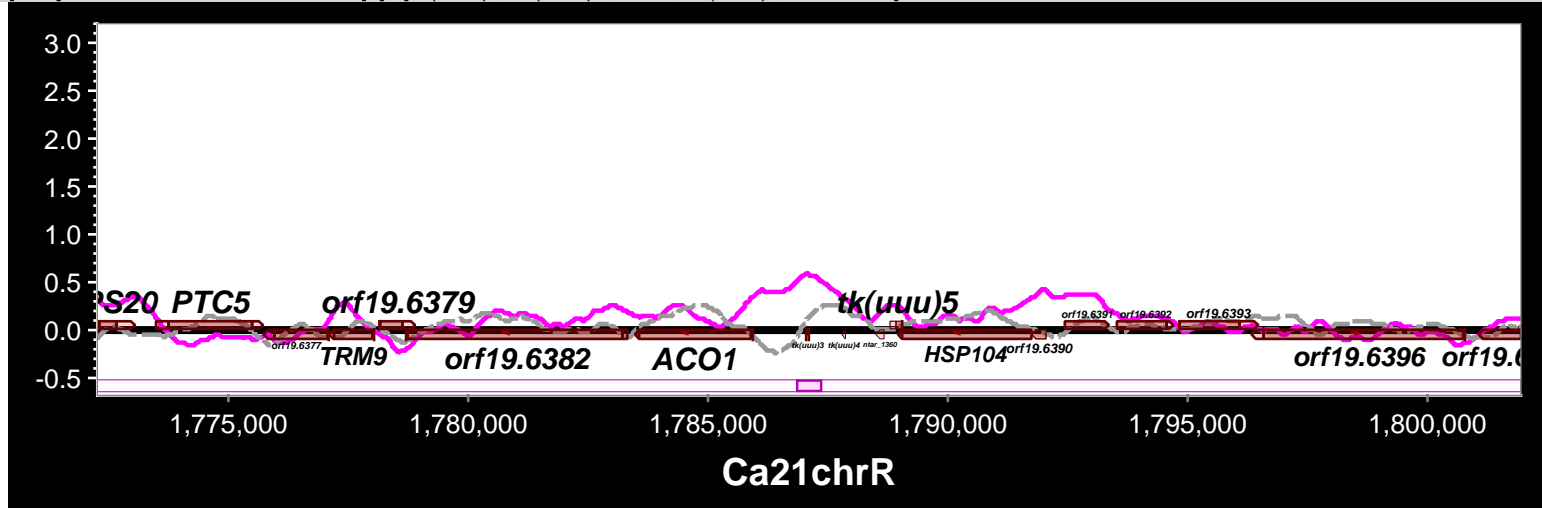

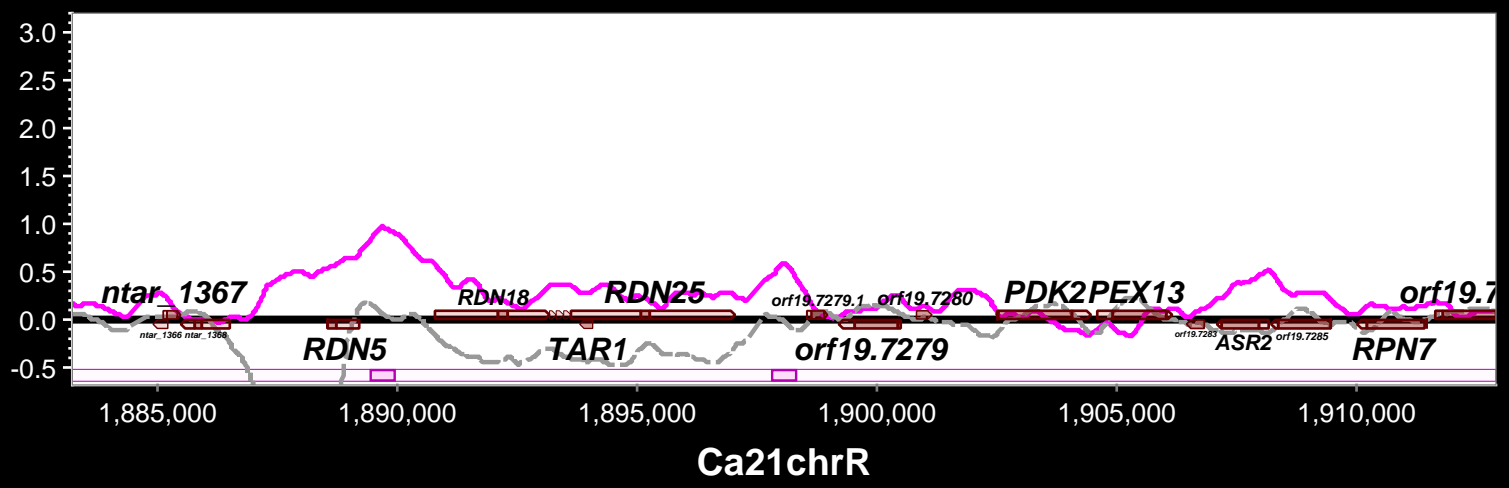

## **Chromatin immunoprecipitation (ChIP) mapping of genomic Ndt80 binding sites**

Ndt80 Myc-tagged strain CJN1748 vs. untagged wild-type strain SN250 immunoprecipitation binding data were performed under biofilm conditions. The X-axis represents ORF chromosomal locations. The Y-axis is the Agilent normalized enrichment value (log2) post-smoothing for the binding of Ndt80. Ndt80-Myc strain (dark blue line) and untagged wild-type strain (grey dashed line) ChIP-chip array binding data was mapped and plotted onto the chromosomes containing the ORFs shown using MochiView v.1.45 software. All significant called peaks for Ndt80 are indicated by the dark blue track under the peak (see Supplemental Dataset 2 for exact locations and enrichment values). Peak-finding significance thresholds of  $P \leq 0.001$  were used followed by a user-defined cut-off for the minimum value for peak inclusion post-smoothing set to 0.58 (see MochiView manual for details). Genes plotted above the bold line read in the sense direction; genes plotted below the bold line read in the antisense direction.

[3.193] Ca21chrR:1514385-1544068 [+] [CRZ2, ALS3, URA2, orf19.1815, orf19.1814]

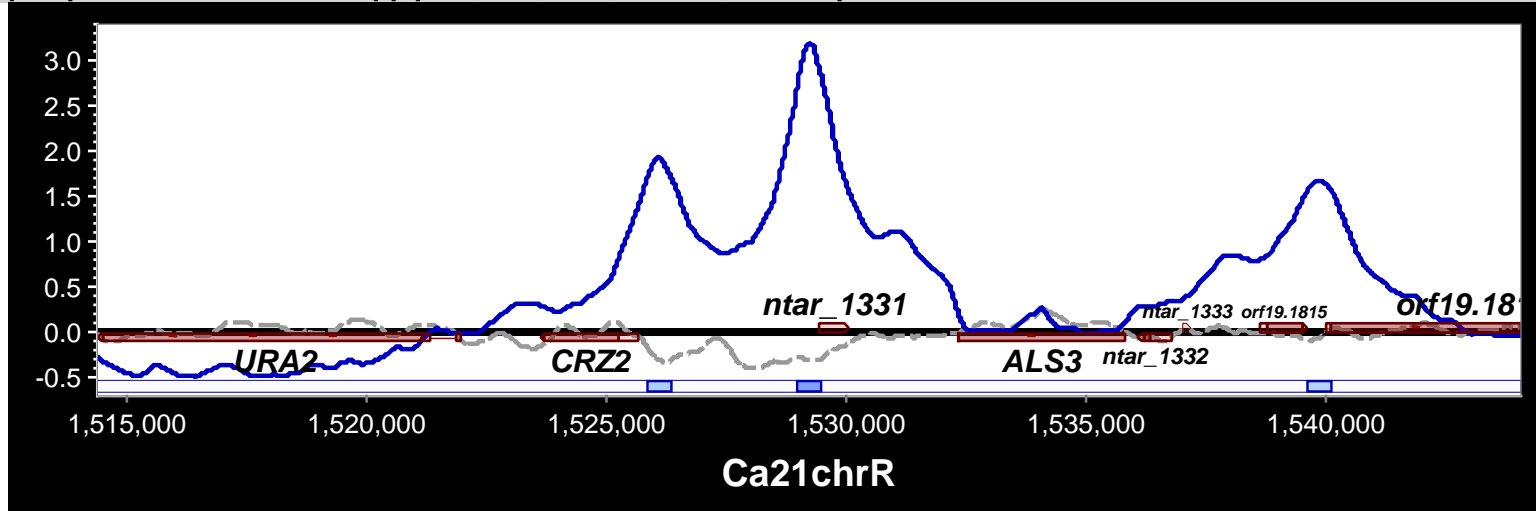

[2.974] Ca21chr5:876110-905793 [+] [orf19.1287, FGR42, orf19.1286, orf19.3210, orf19.1285]

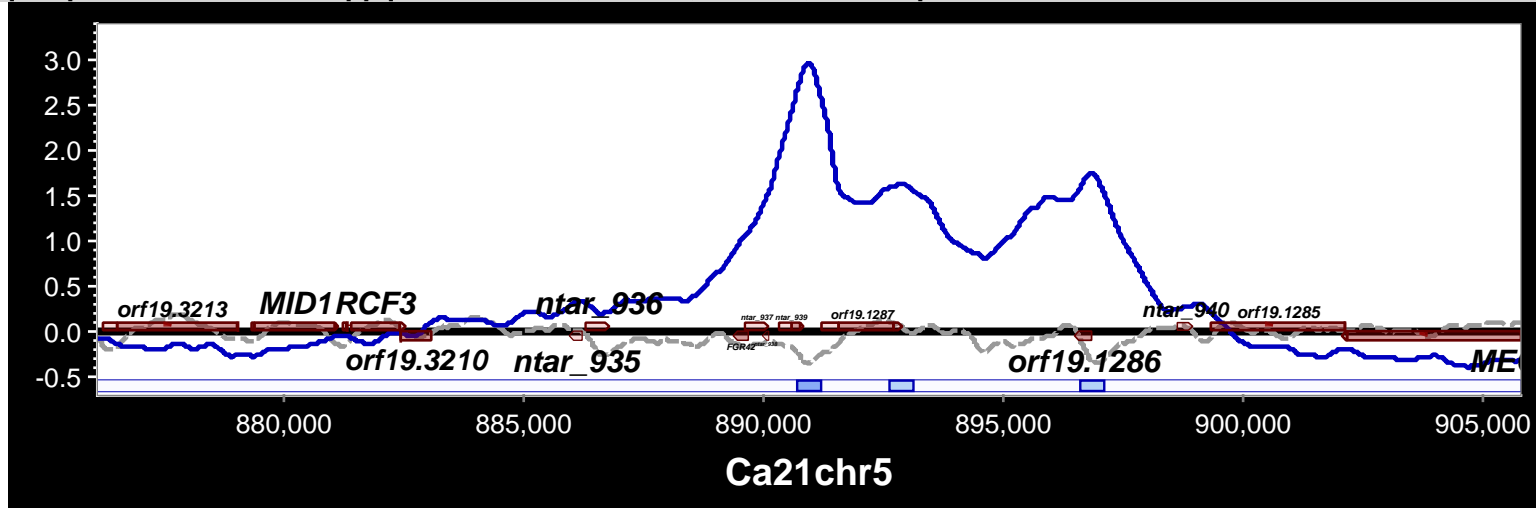

[2.913] Ca21chrR:1357329-1387012 [+] [BCR1, orf19.725, orf19.721, PPZ1, GST3]

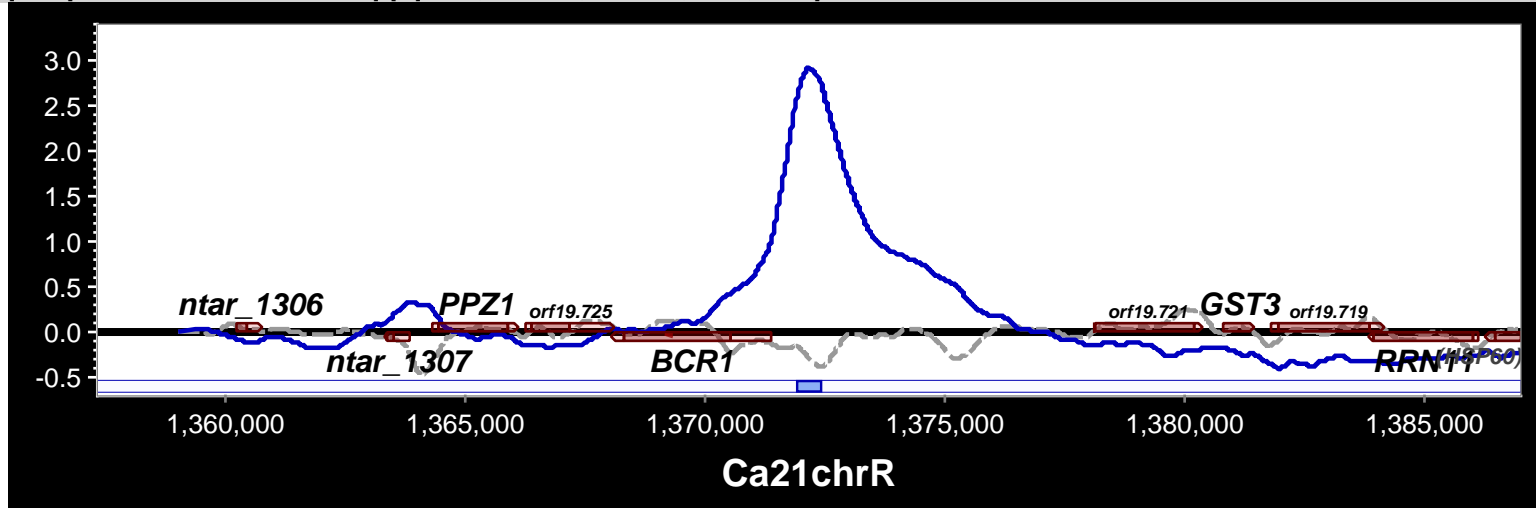

[2.9] Ca21chr1:1067405-1097088 [+] [GAT2, orf19.450, orf19.4057, orf19.449, orf19.4059]

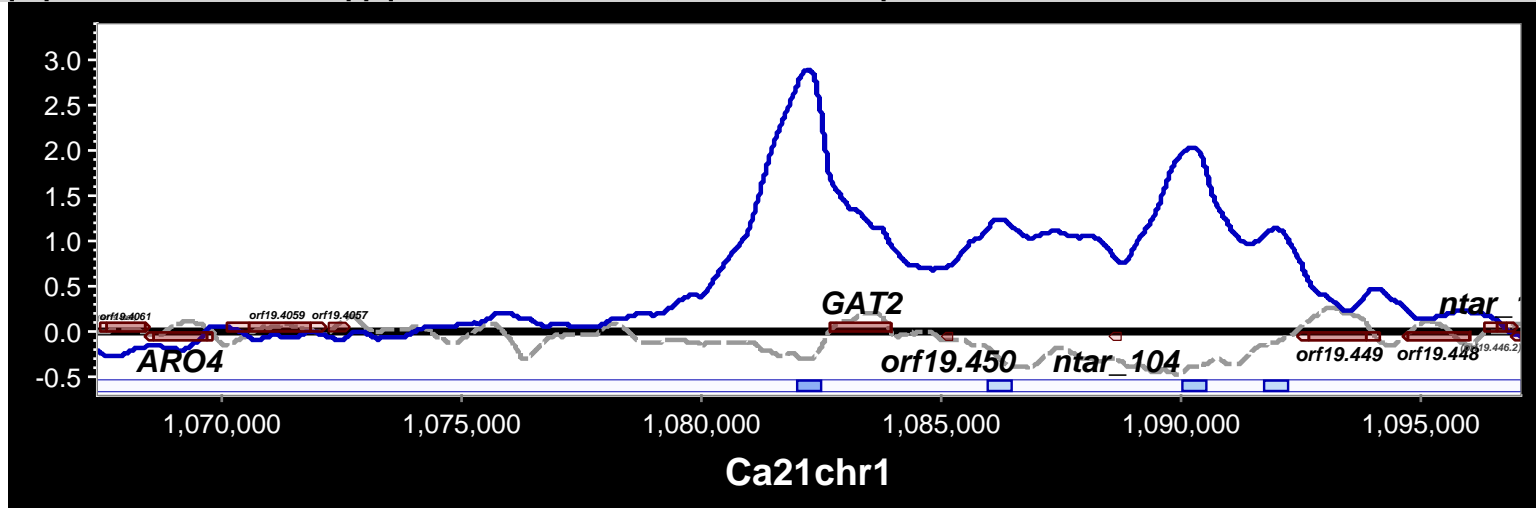

[2.884] Ca21chr3:1234109-1263792 [+] [GAP2, BAT22, orf19.6992, orf19.6995, PRE3]

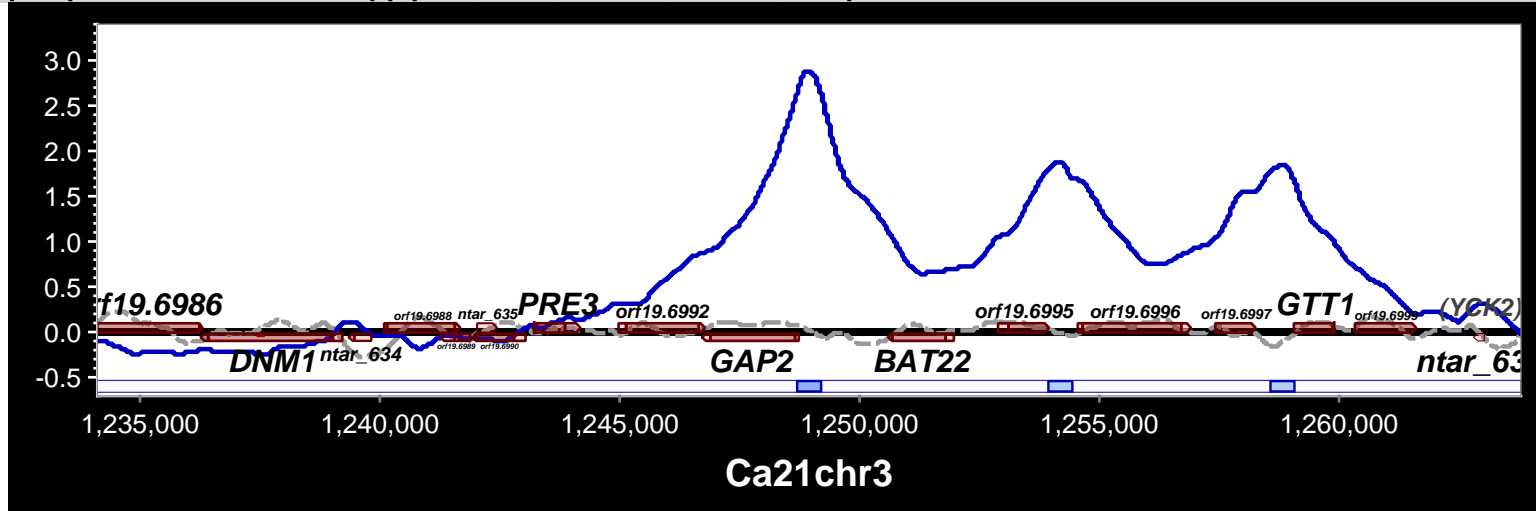

[2.855] Ca21chrR:2154230-2183913 [+] [orf19.7590, FAA4, orf19.7589, orf19.7588, CHT3]

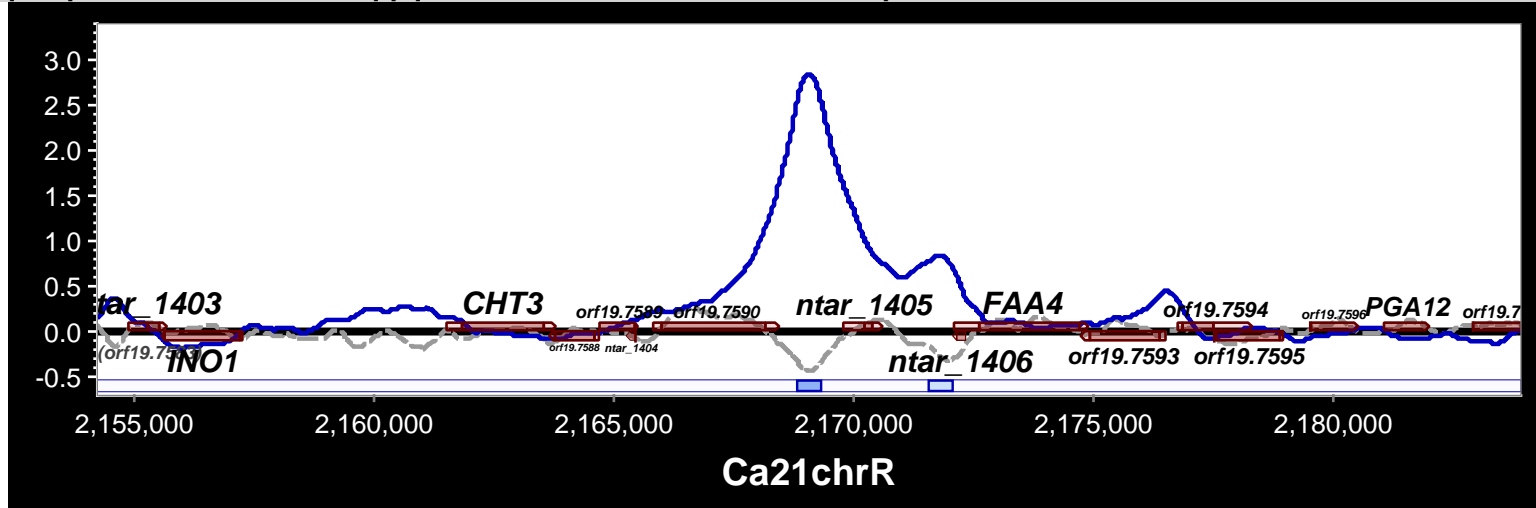

[2.796] Ca21chr1:2387977-2417660 [+] [orf19.2332, orf19.2333, ADA2, RPS17B, BIG1]

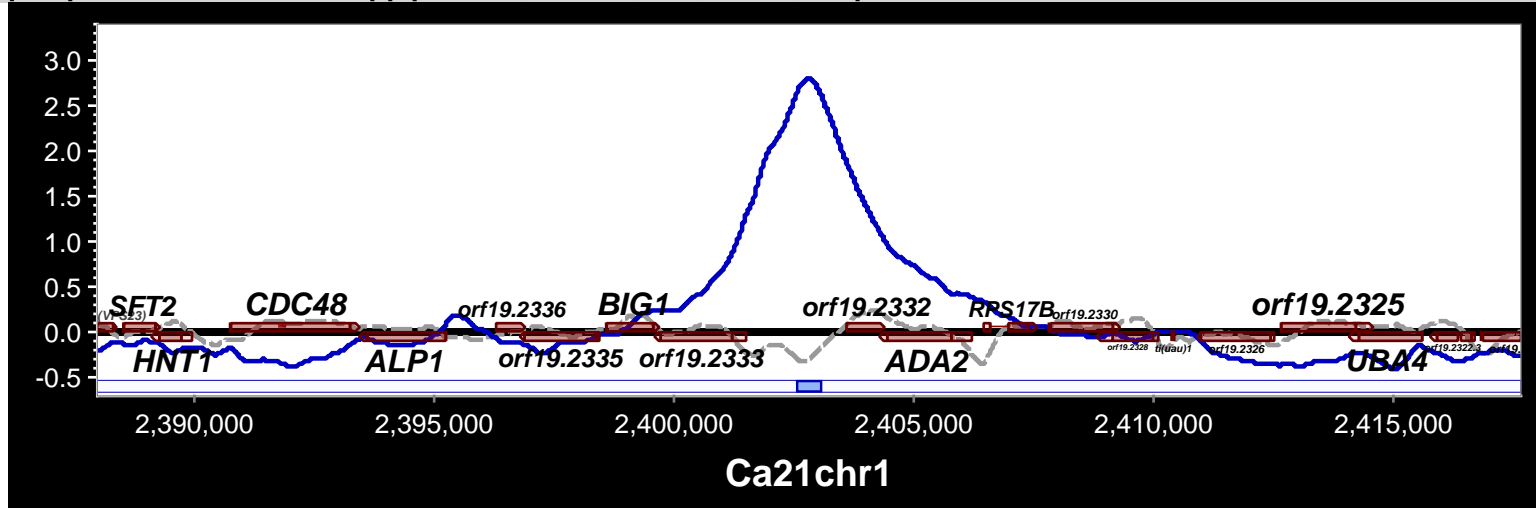

[2.778] Ca21chr5:1102830-1132513 [+] [orf19.4000, orf19.4001, DUN1, orf19.3999, orf19.3998]

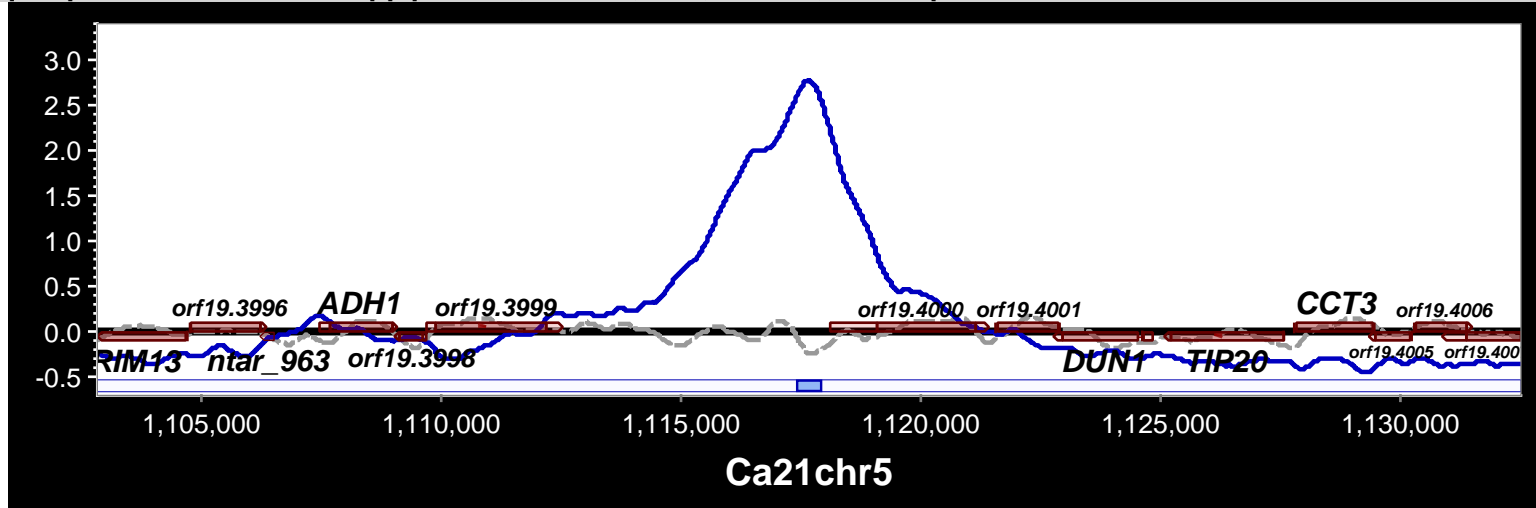



[2.763] Ca21chrR:1981002-2010685 [+] [orf19.7336, orf19.7337, PRE8, BGL22, ELF1]

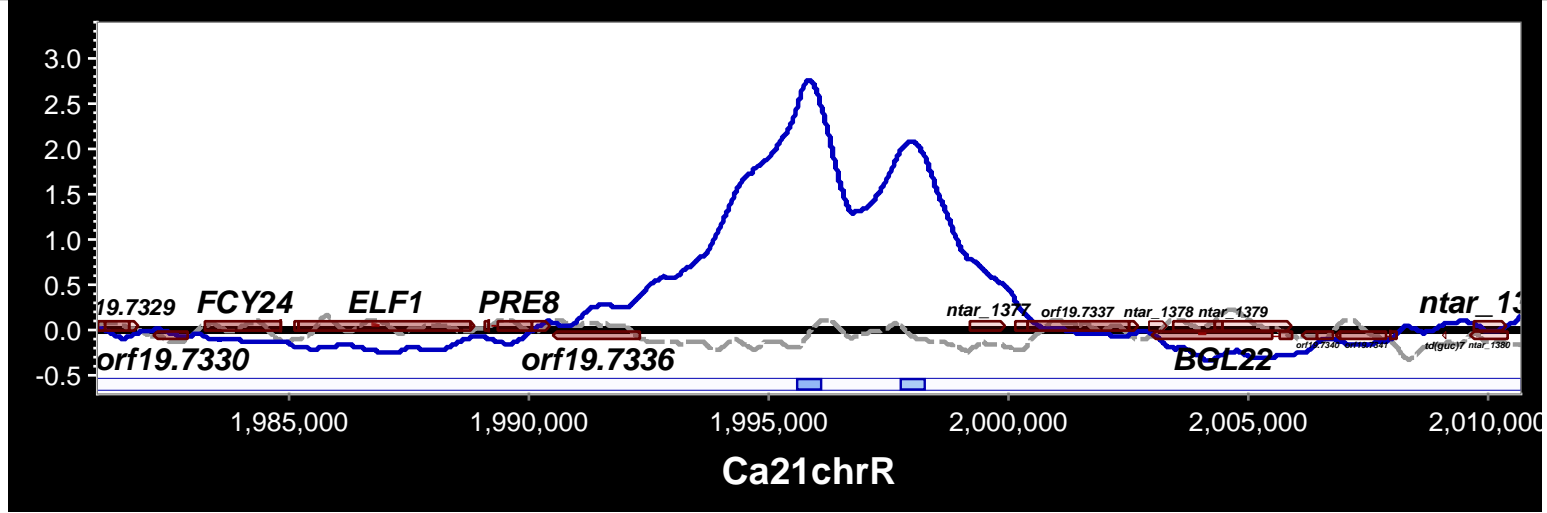

[2.743] Ca21chr3:324102-353785 [+] [TOS1, orf19.1691, orf19.1687, CAS4, orf19.1686]

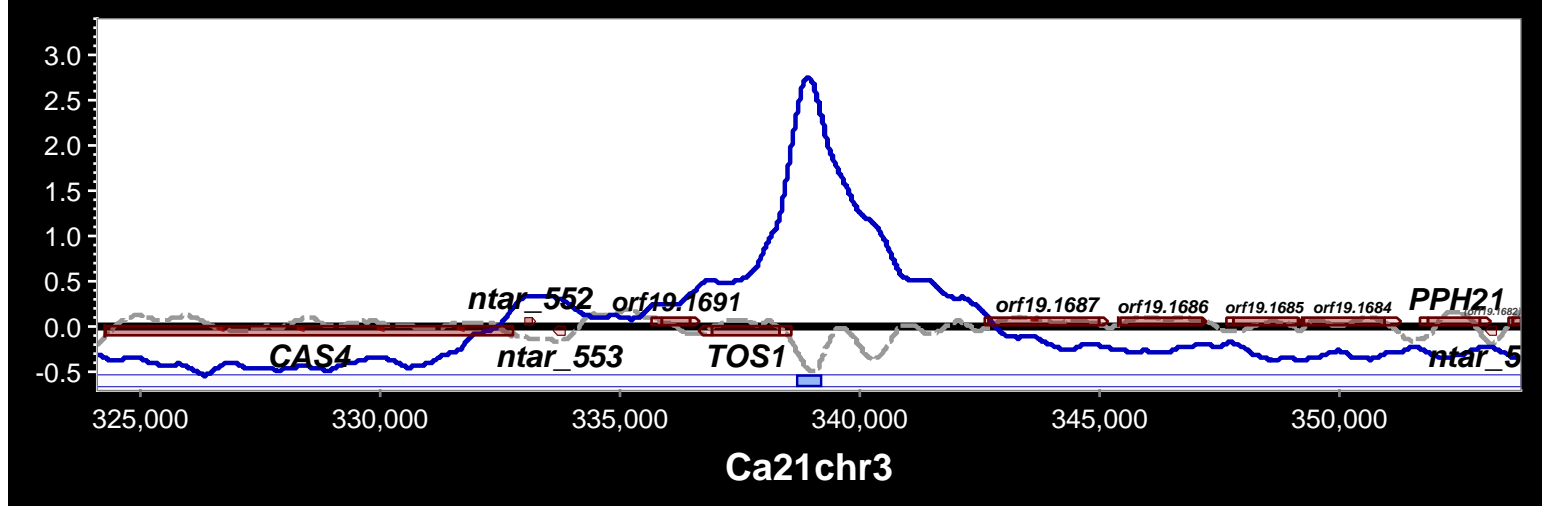

[2.714] Ca21chrR:1298654-1328337 [+] [orf19.3868, orf19.3869, RPL7, ADE13, orf19.3871]

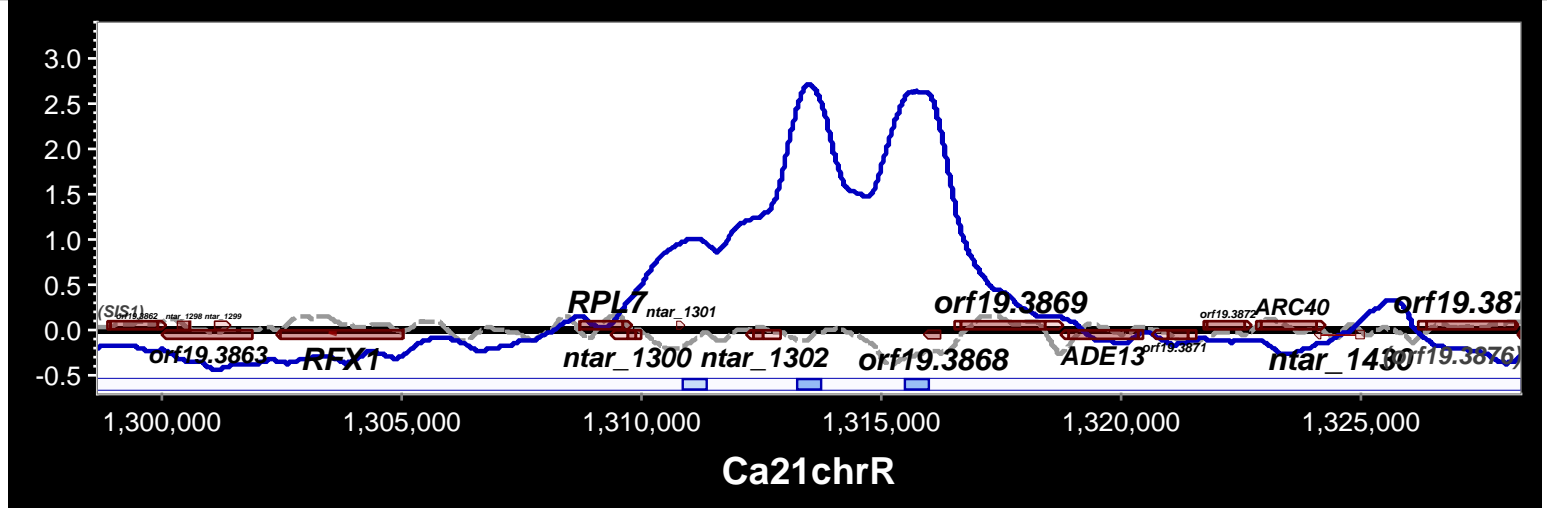

[2.703] Ca21chr1:2875872-2905555 [+] [orf19.4952, orf19.4951, orf19.4952.1, orf19.4953, AKR1]

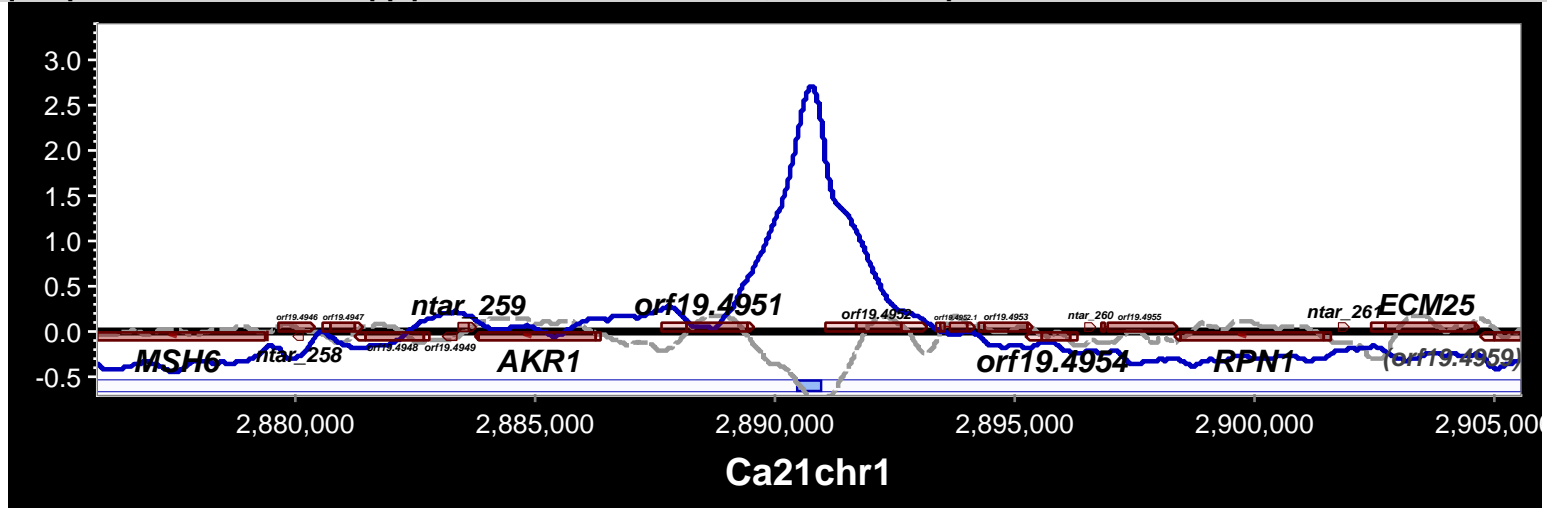

[2.672] Ca21chr1:2086410-2116093 [+] [orf19.4818, orf19.4819, RAM2, orf19.4816, orf19.4820]

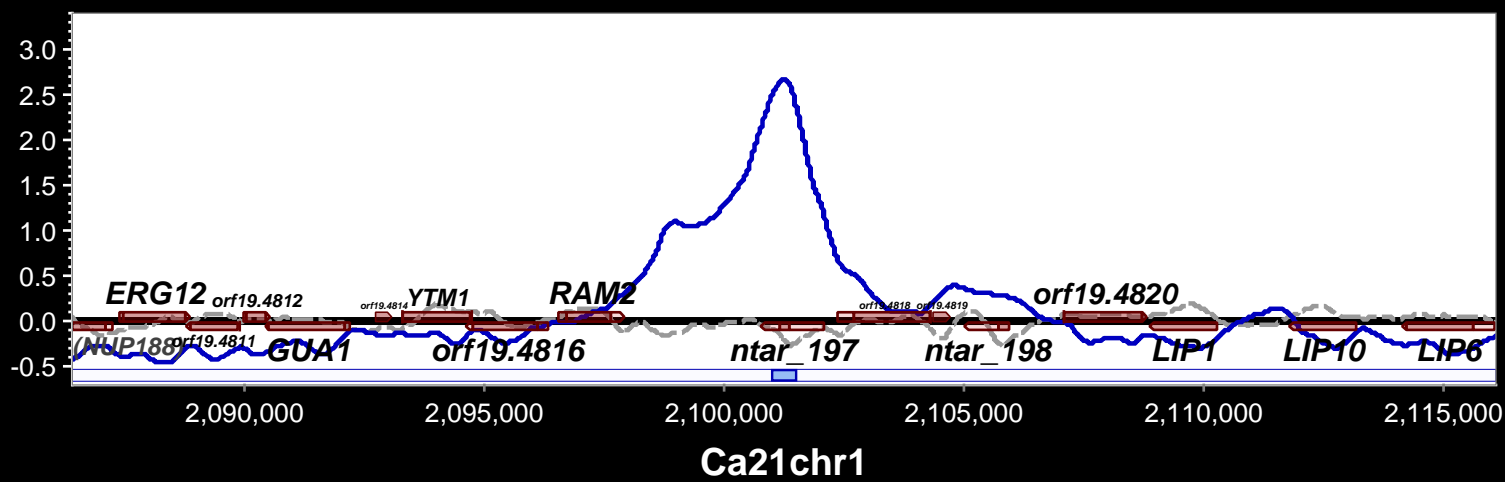

[2.668] Ca21chr1:1742810-1772493 [+] [CDR4, orf19.5078, orf19.5077, orf19.5076.1, PFY1]

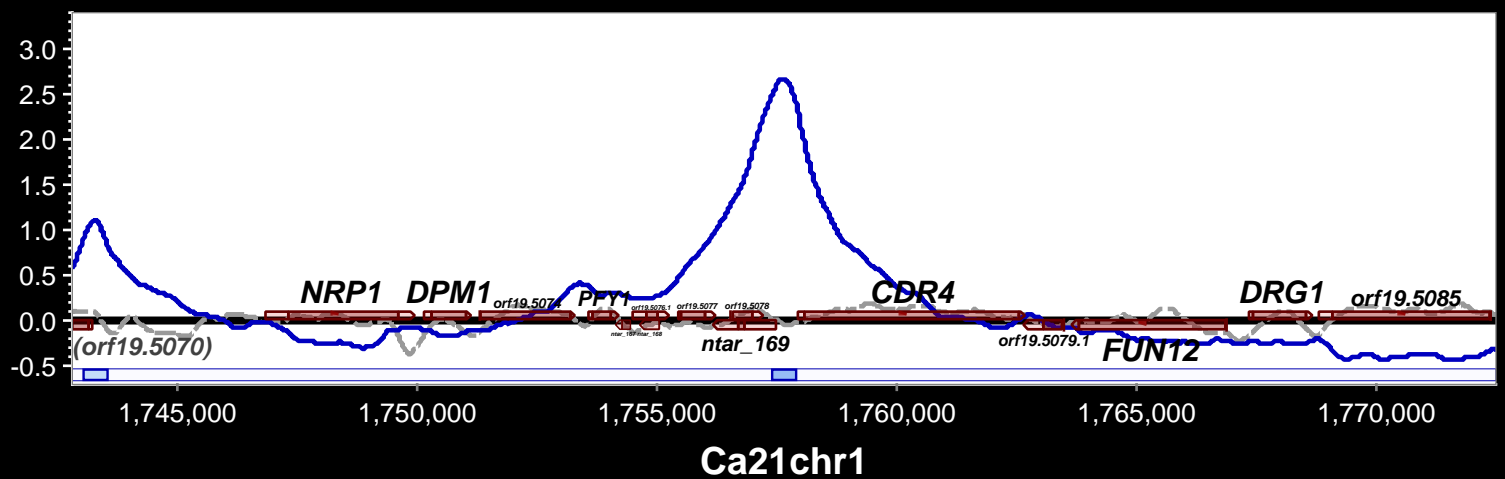

[2.643] Ca21chrR:1300900-1330583 [+] [orf19.3868, orf19.3869, ADE13, orf19.3871, orf19.3872]

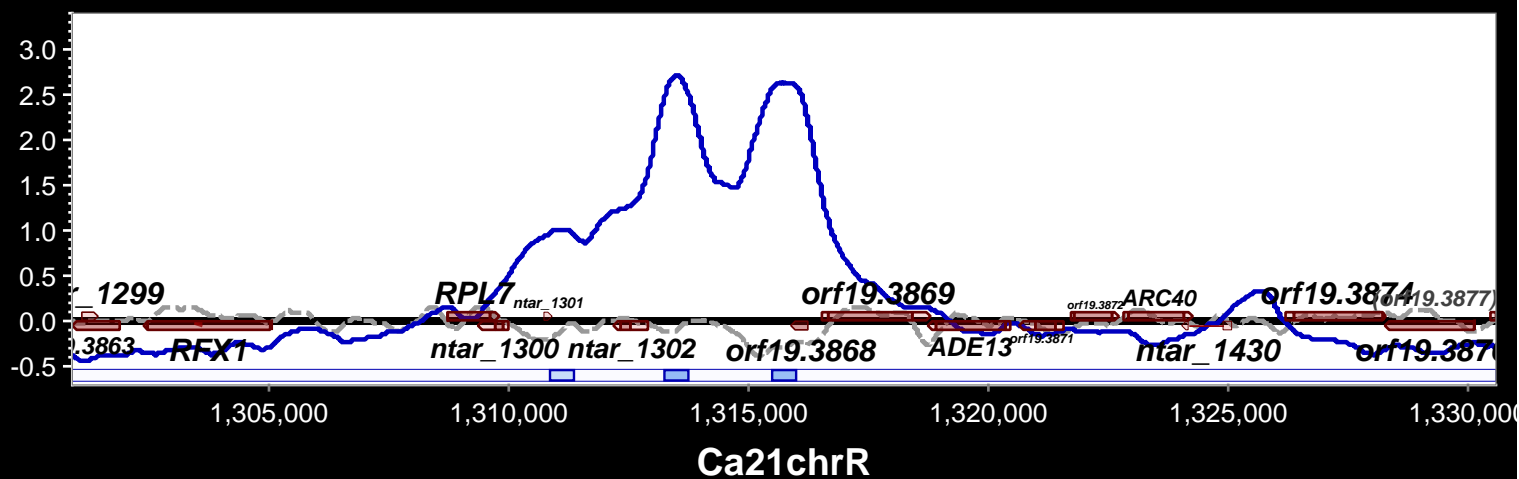

[2.561] Ca21chr2:2040312-2069995 [+] [MP65, orf19.1778, orf19.1777, orf19.1780, orf19.1782]

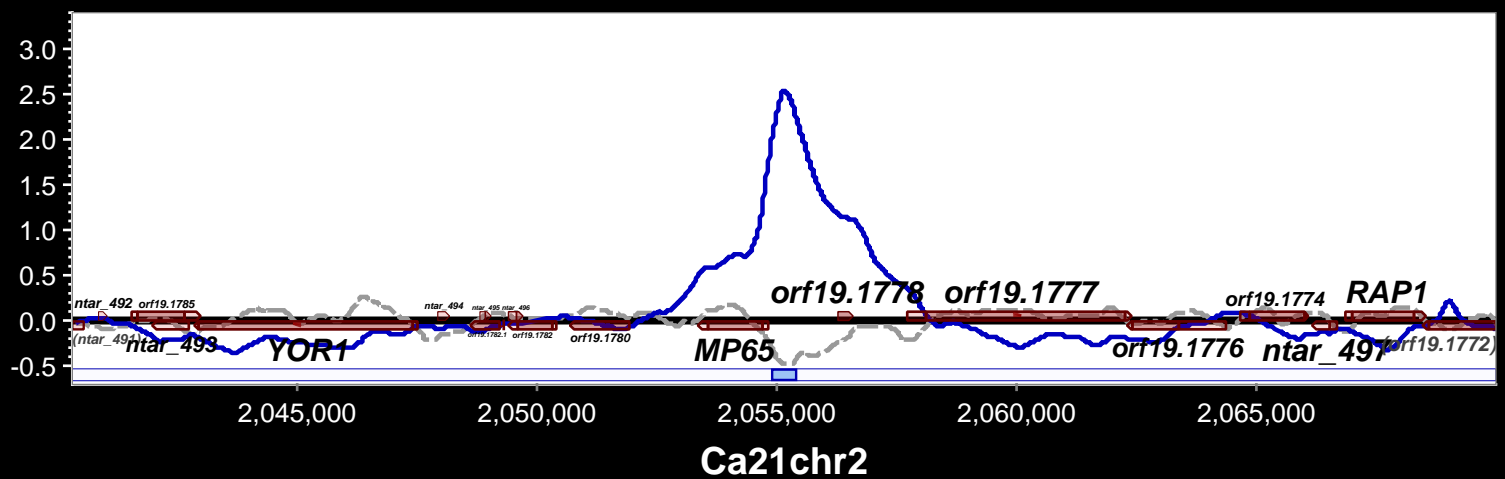

[2.504] Ca21chr5:585483-615166 [+] [orf19.4283, orf19.4282, BUR2, orf19.4281, orf19.4286]

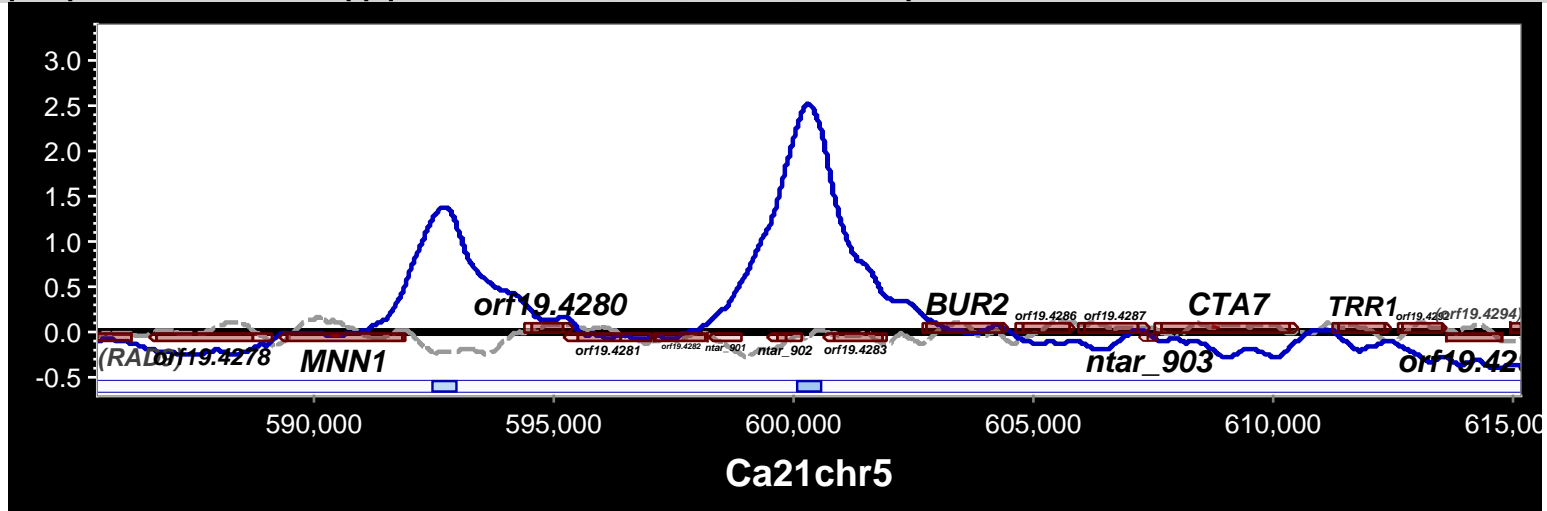

[2.478] Ca21chrR:1028257-1057940 [+] [orf19.6311, RPS3, orf19.6310, MNT4, orf19.6313.2]

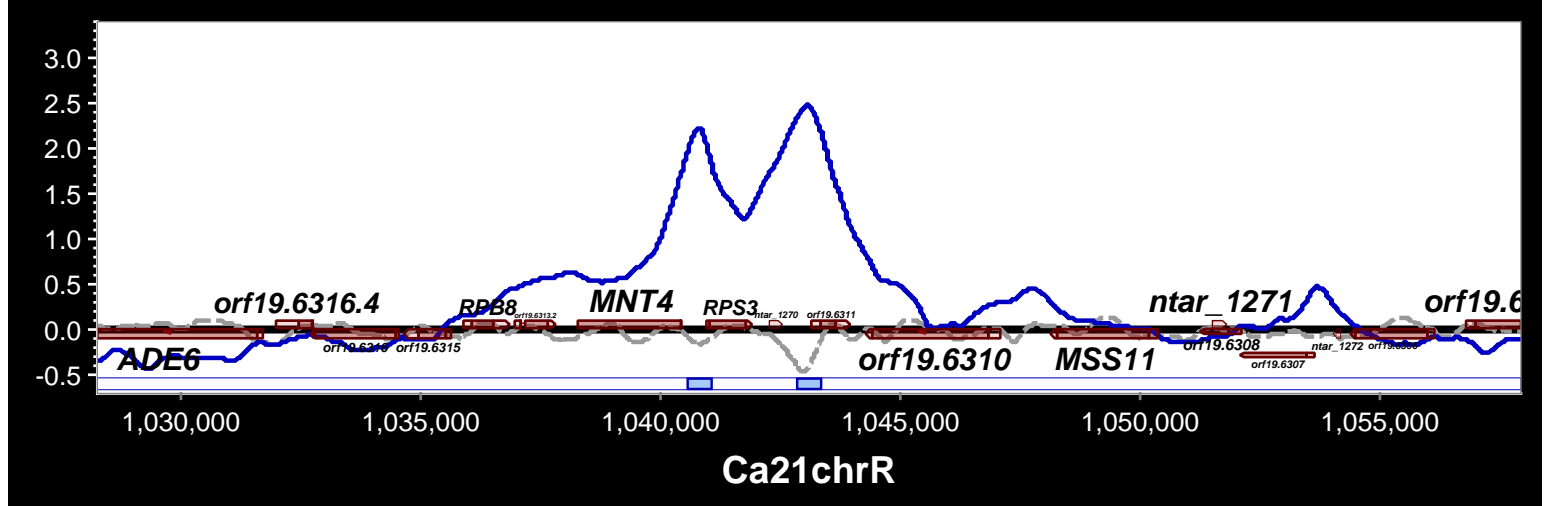

[2.476] Ca21chr1:284332-314015 [+] [orf19.3337, orf19.3338, SOD2, orf19.3335, RPS21]

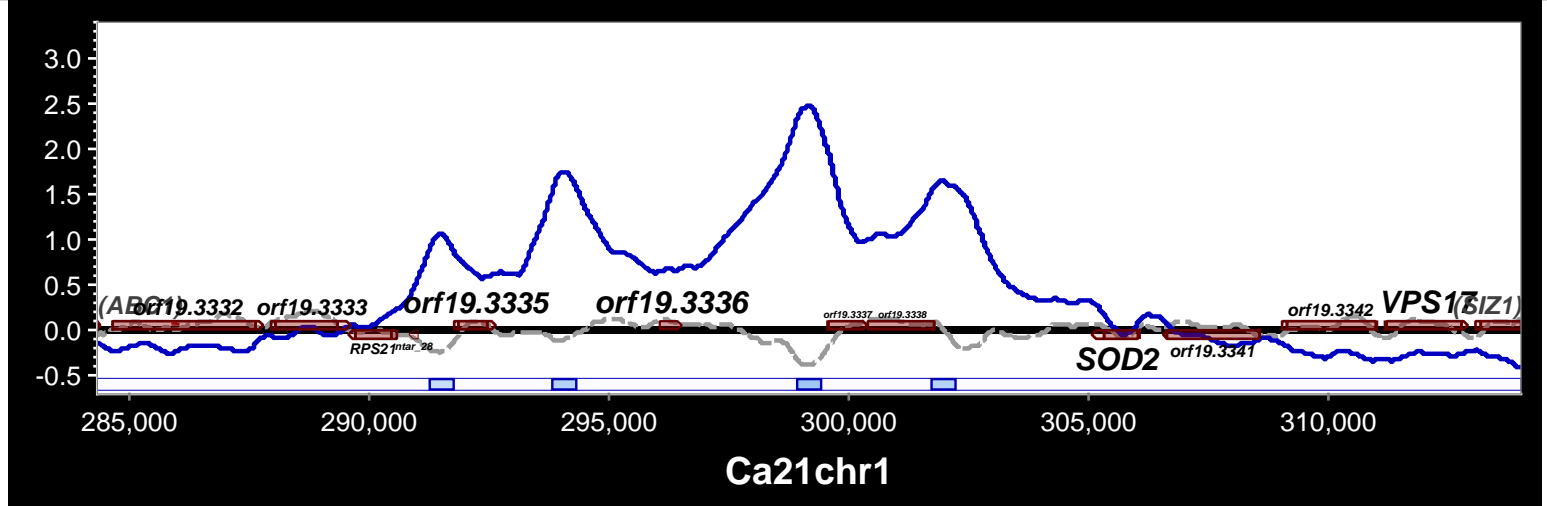

[2.473] Ca21chr3:1460614-1490297 [+] [AAF1, ECM15, th(GUG)3, orf19.7437, GLG2]

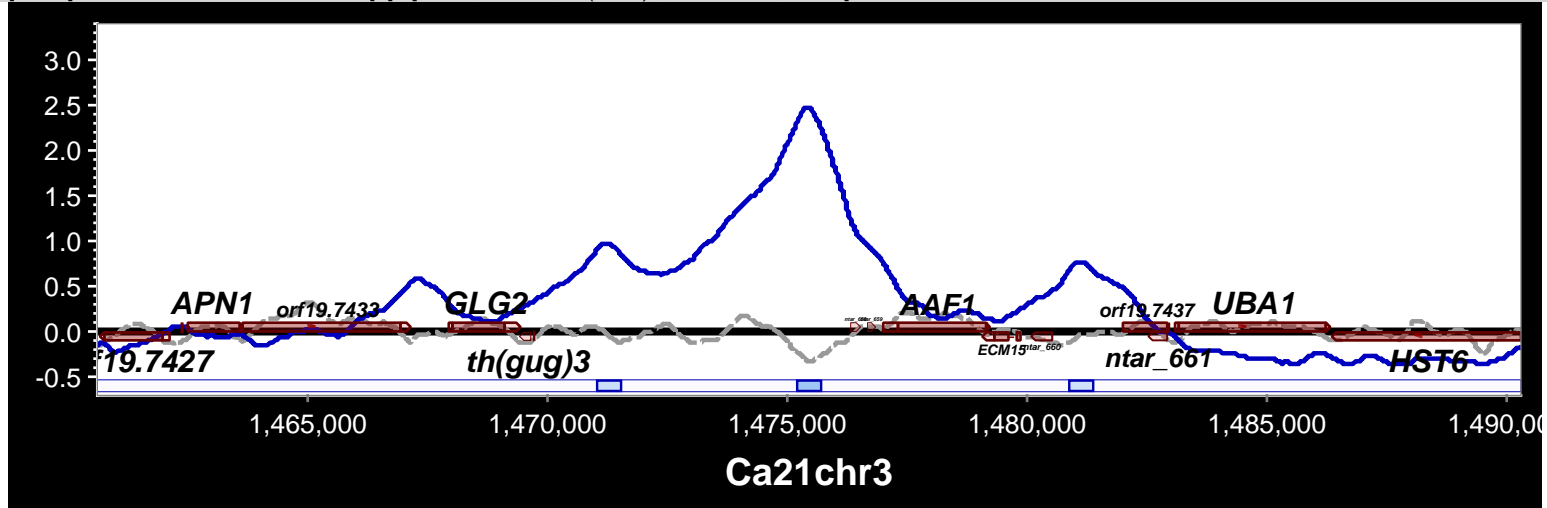

[2.473] Ca21chr5:96796-126479 [+] [AGA1, orf19.936, orf19.938, orf19.934, orf19.933]

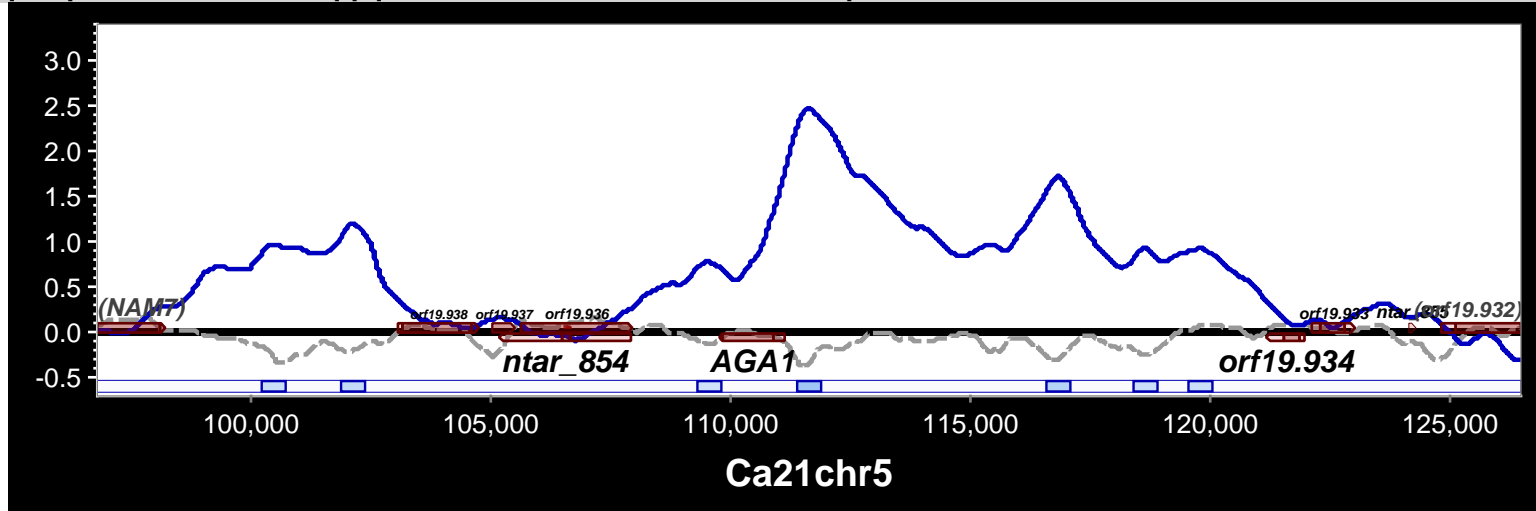

[2.425] Ca21chr7:97162-126845 [+] [orf19.7054, GAC1, orf19.7056, orf19.7057, orf19.7058]

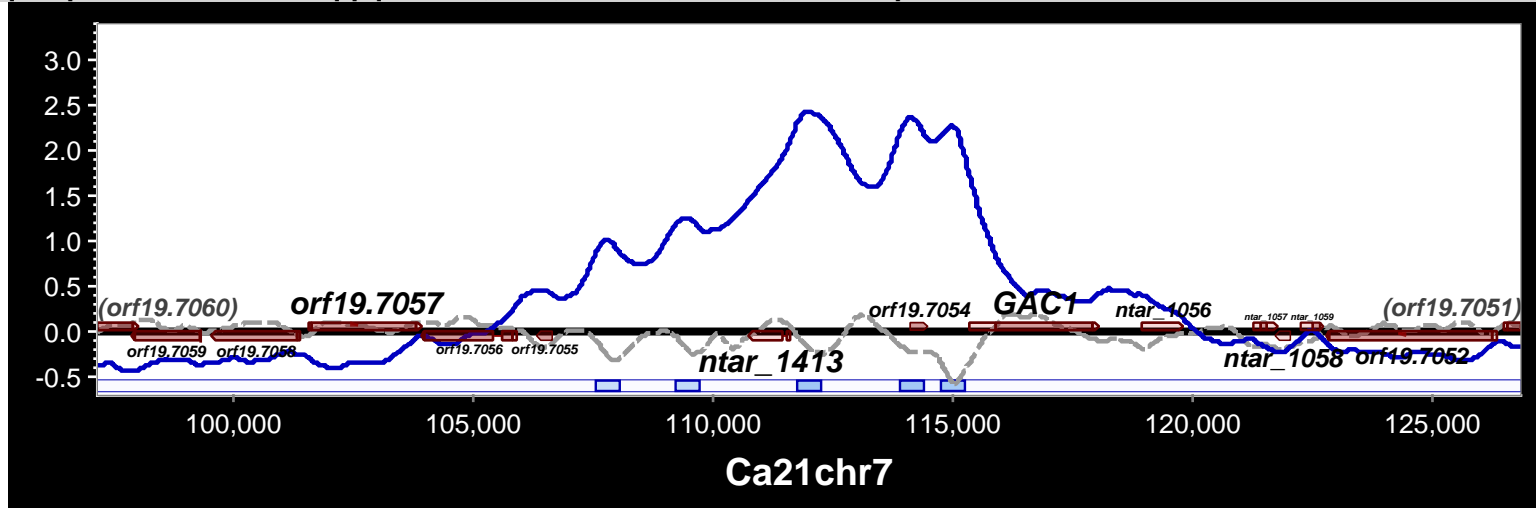

[2.417] Ca21chr4:764896-794579 [+] [tG(GCC)2, tD(GUC)4, tD(GUC)3, tD(GUC)2, SPO75]

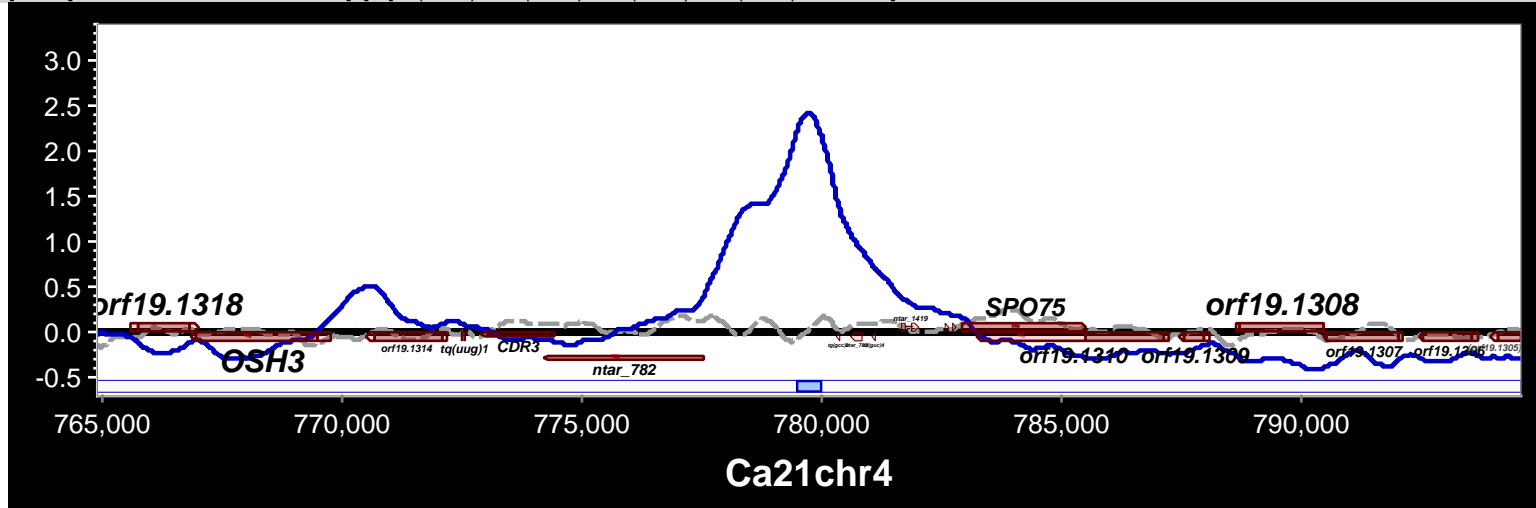

[2.414] Ca21chr4:465184-494867 [+] [orf19.2766, PGA62, orf19.2763, AHP1, orf19.2761]

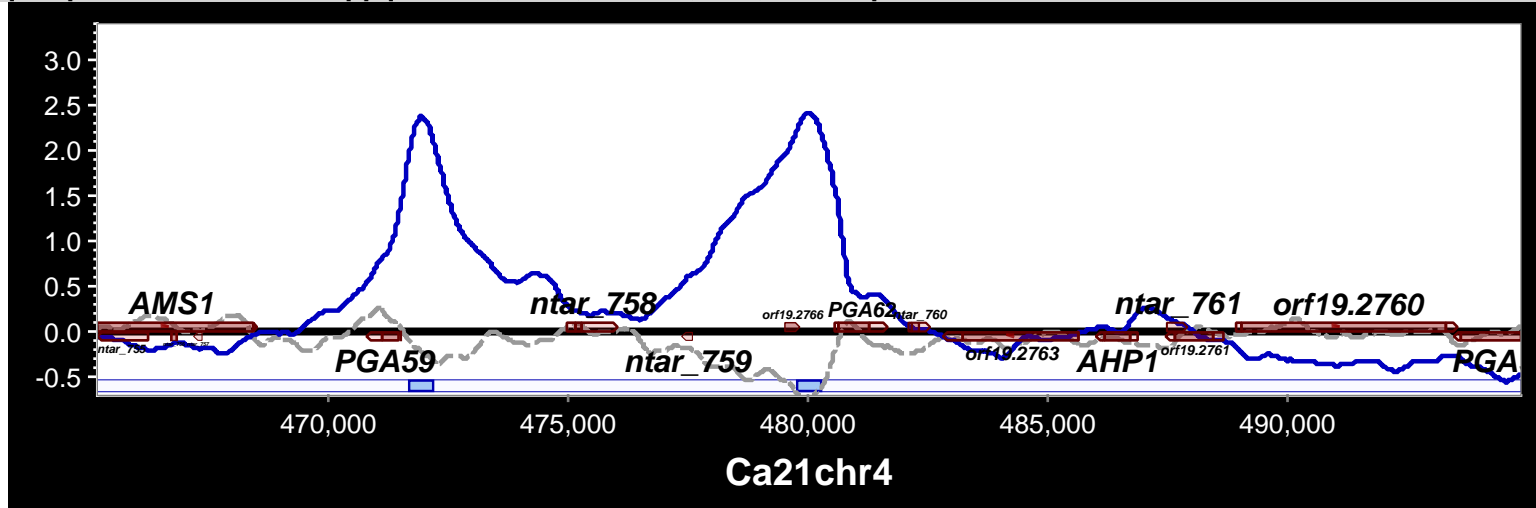

[2.41] Ca21chr2:1366706-1396389 [+] [orf19.3148, LSP1, GRE2, orf19.3147, orf19.3151]

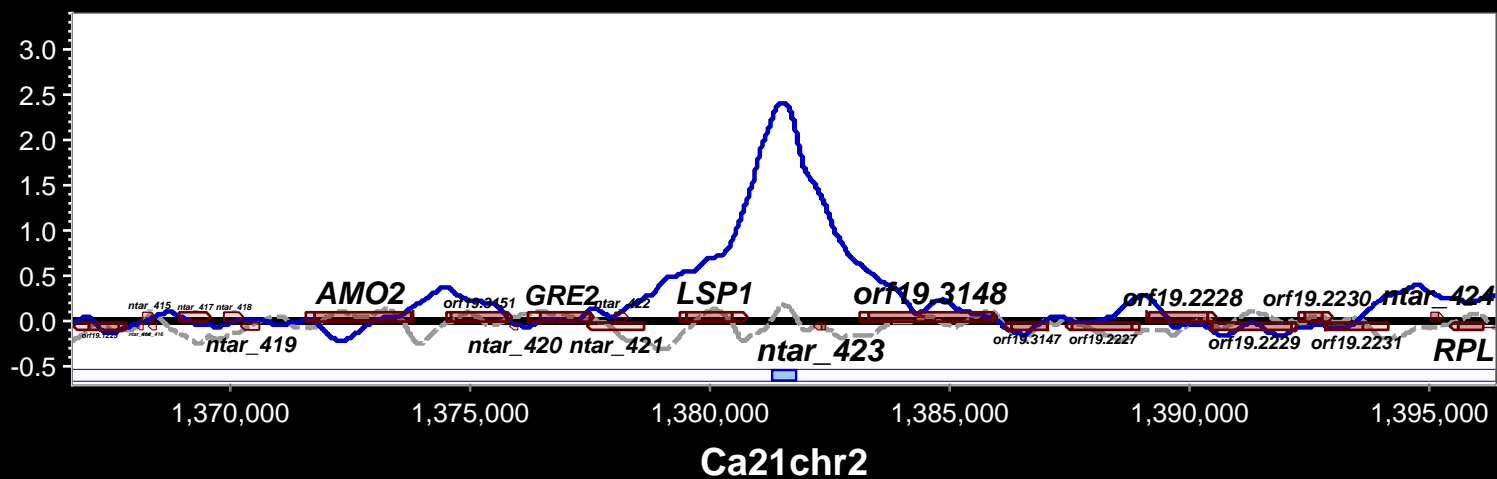

[2.406] Ca21chrR:1707032-1736715 [+] [EFG1, orf19.609, orf19.607, tg(GCC)1, orf19.612]

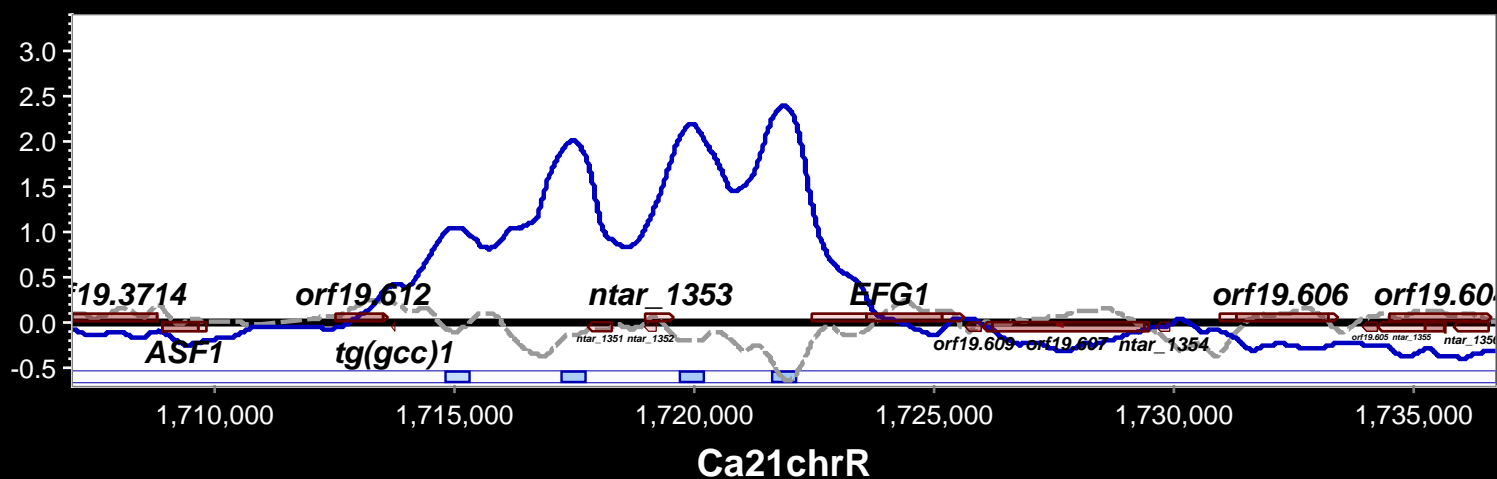

[2.384] Ca21chr1:958200-987883 [+] [PIL1, HAT1, orf19.776, orf19.775, DUR1,2]

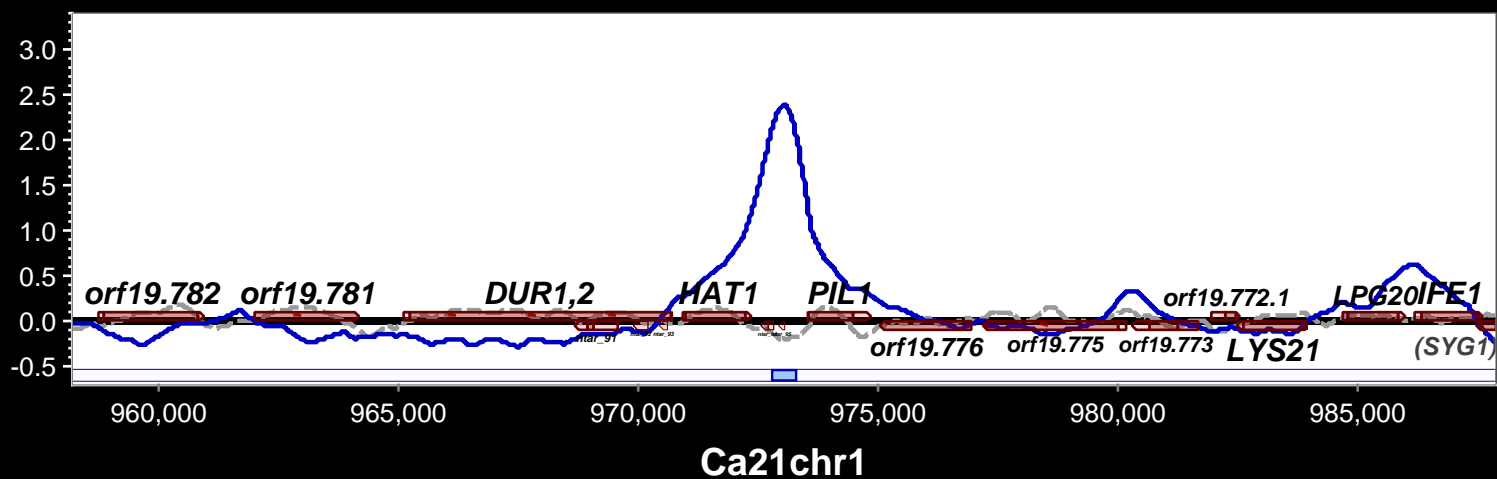

[2.376] Ca21chr3:1533145-1562828 [+] [orf19.6824, SLF1, orf19.6822, SLU7, orf19.6821]

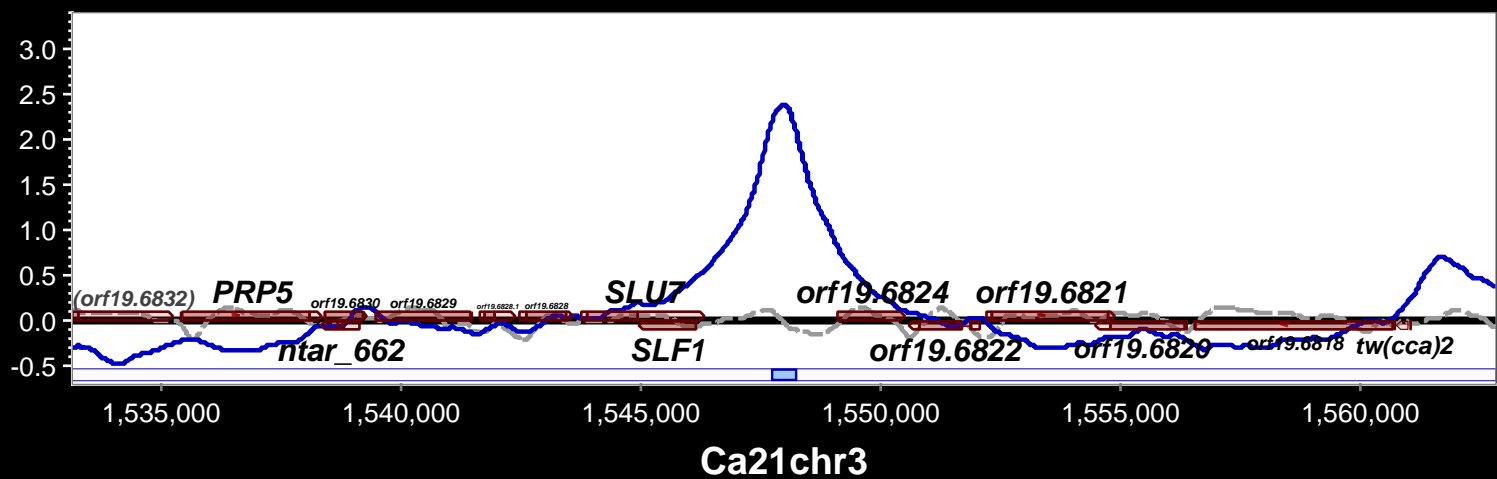

[2.371] Ca21chr4:457094-486777 [+] [PGA59, AMS1, orf19.2766, orf19.2769, PGA62]

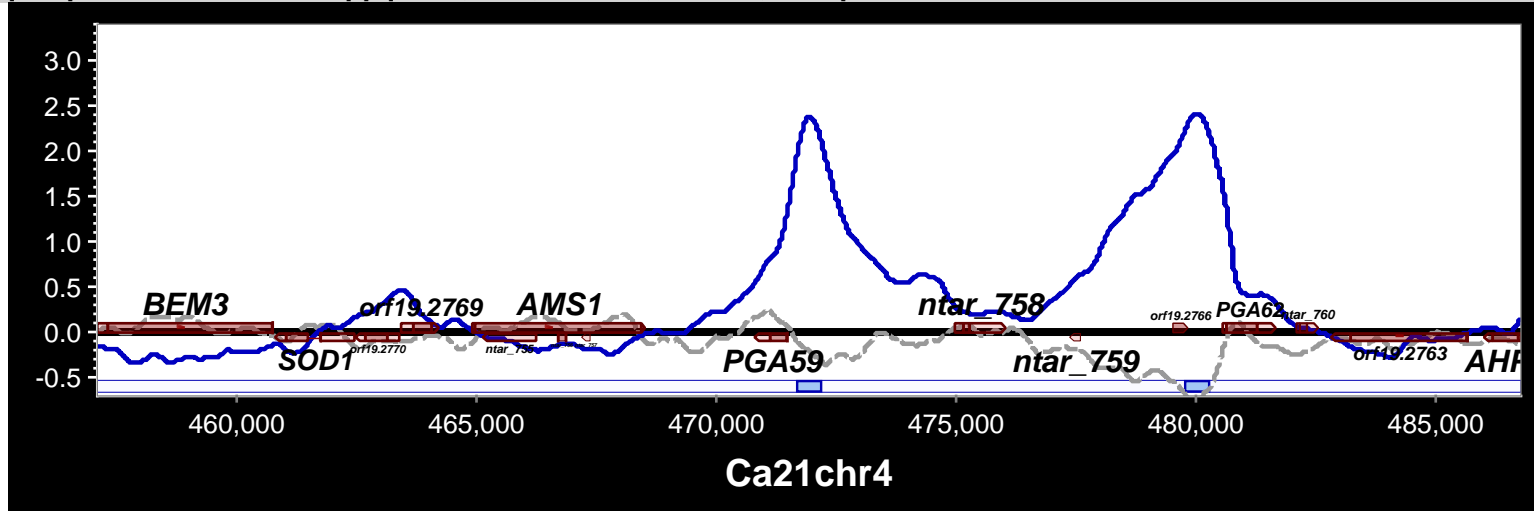

[2.359] Ca21chr7:99306-128989 [+] [orf19.7054, GAC1, orf19.7056, orf19.7052, orf19.7051]

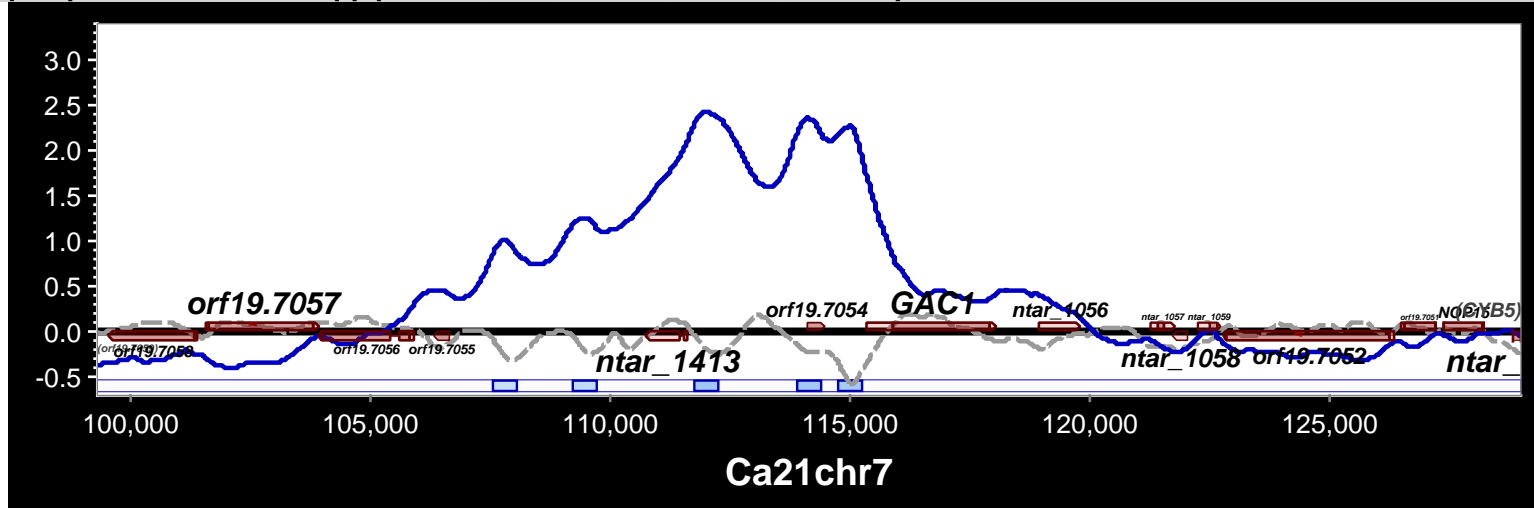

[2.342] Ca21chr1:2714037-2743720 [+] [RAX2, tw(CCA)1, GSG1, orf19.3767, orf19.68.2]

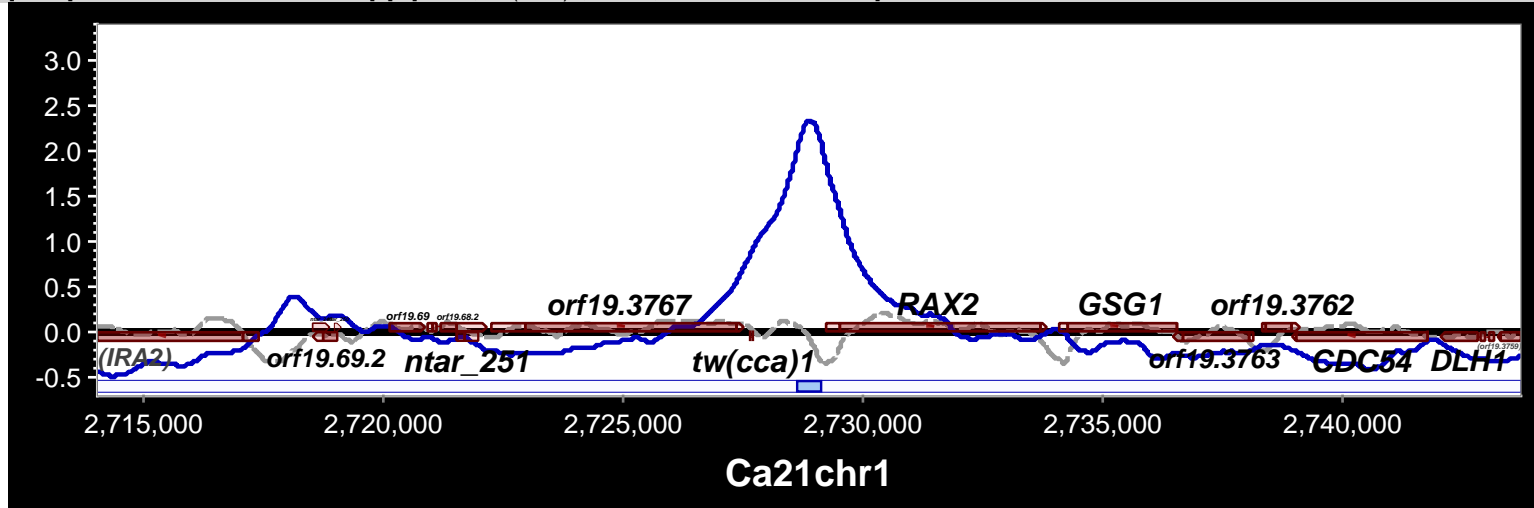

[2.342] Ca21chr3:1678378-1708061 [+] [orf19.6754, orf19.6753, orf19.6755, orf19.6752, orf19.6756]

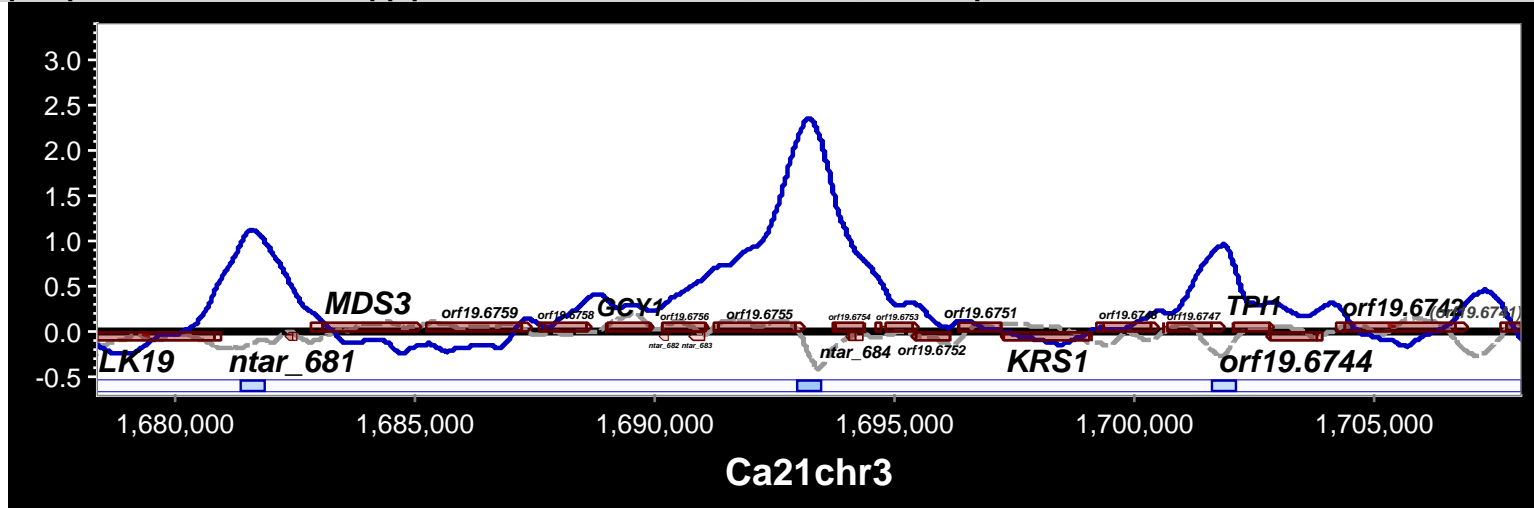

[2.329] Ca21chr1:1437456-1467139 [+] [CAT1, orf19.6230, MRPL19, orf19.6227, NPR1]

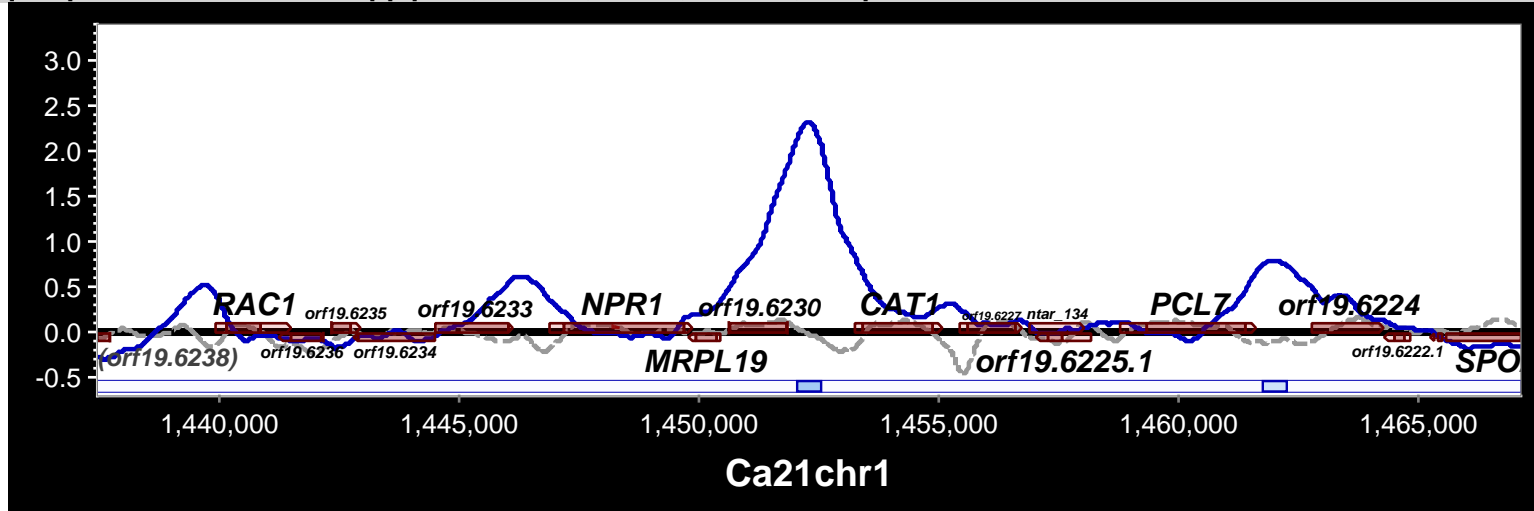

[2.327] Ca21chr1:906433-936116 [+] [orf19.6840, orf19.6838, orf19.6837, orf19.5194.1, orf19.6833.2]

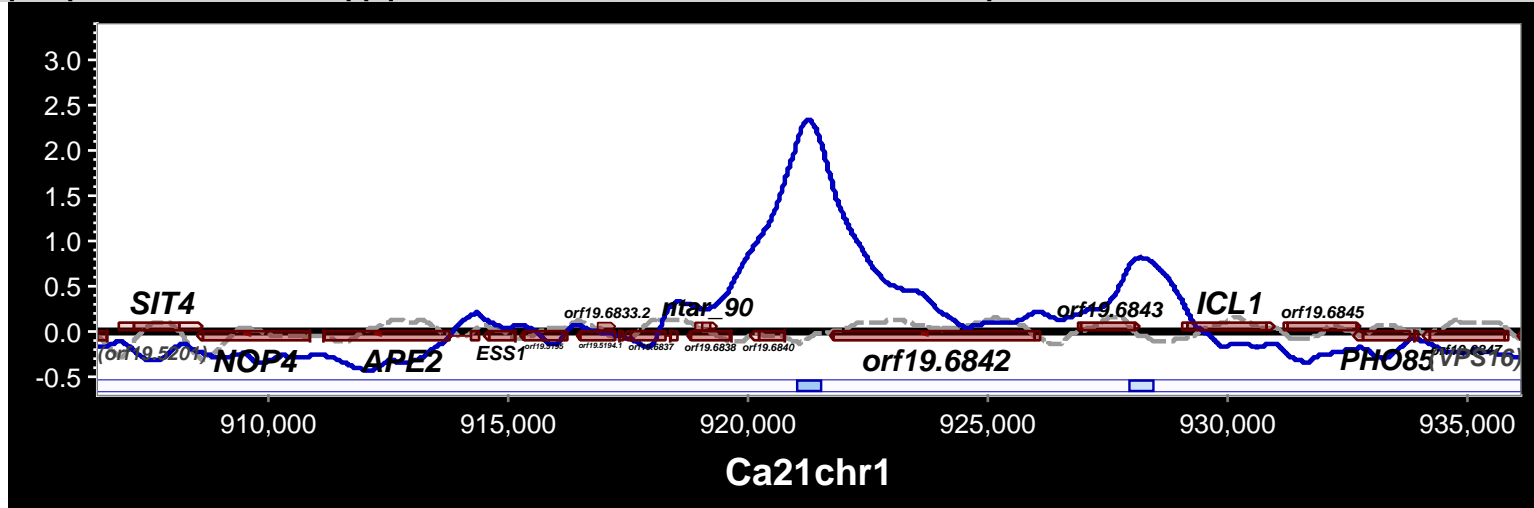

[2.325] Ca21chr1:436667-466350 [+] [orf19.3671, GAL10, GAL1, orf19.3673, GAL102]

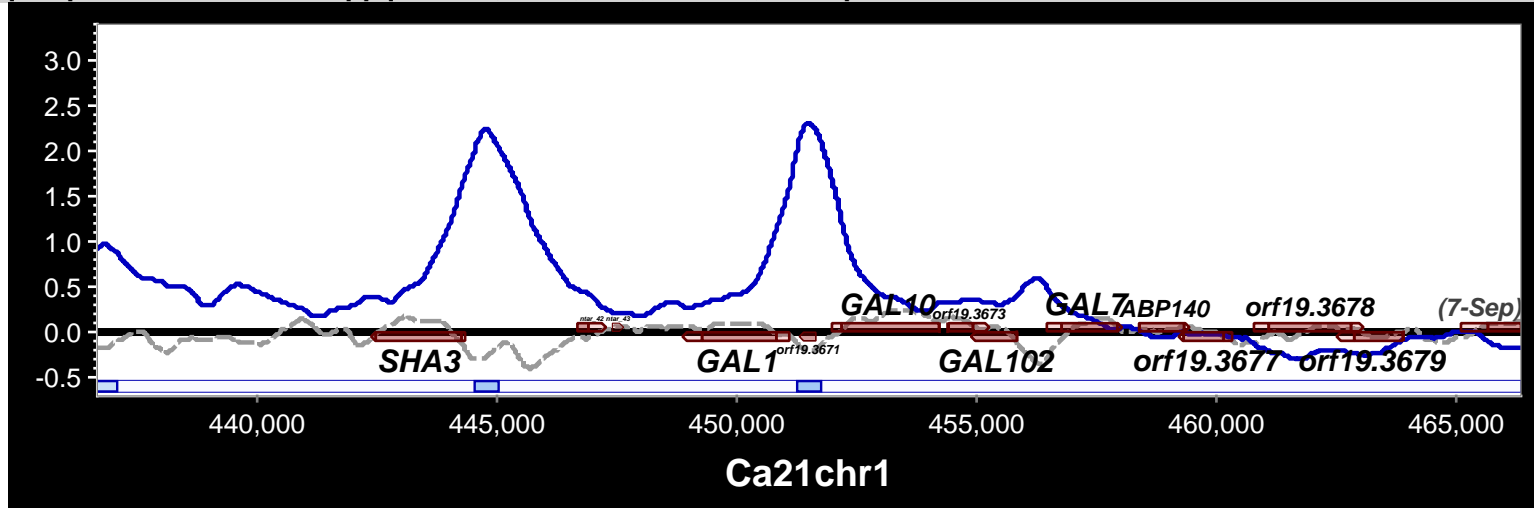

[2.317] Ca21chr2:1731723-1761406 [+] [YWP1, orf19.3617, ERG9, orf19.3621, orf19.3615]

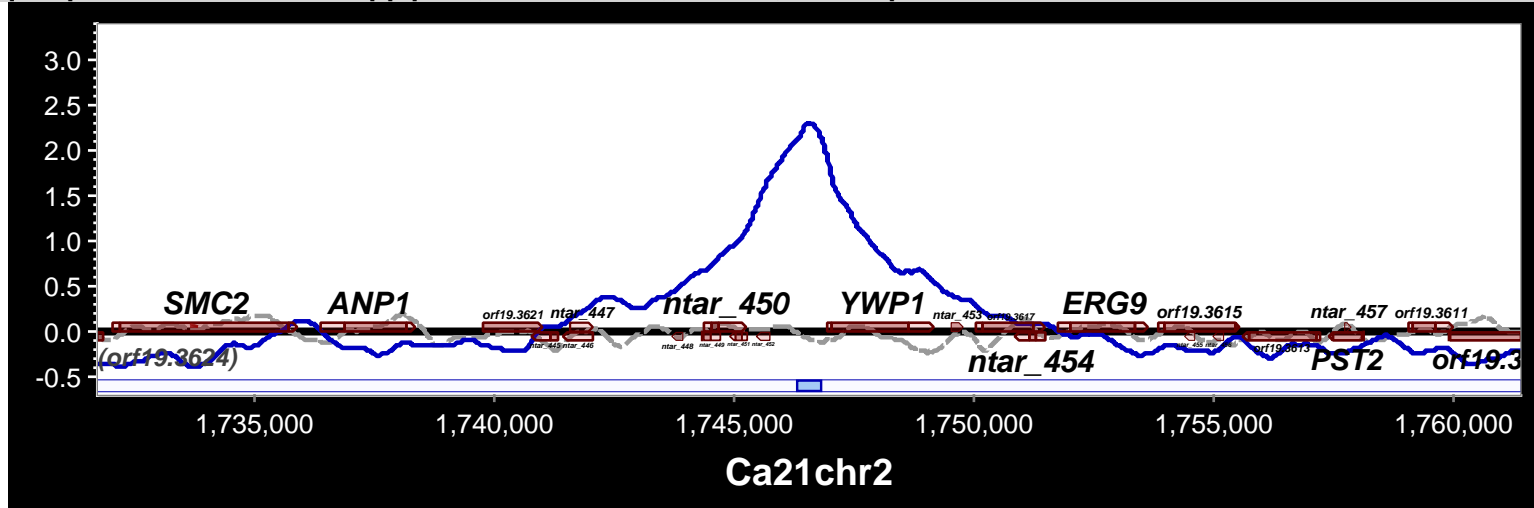

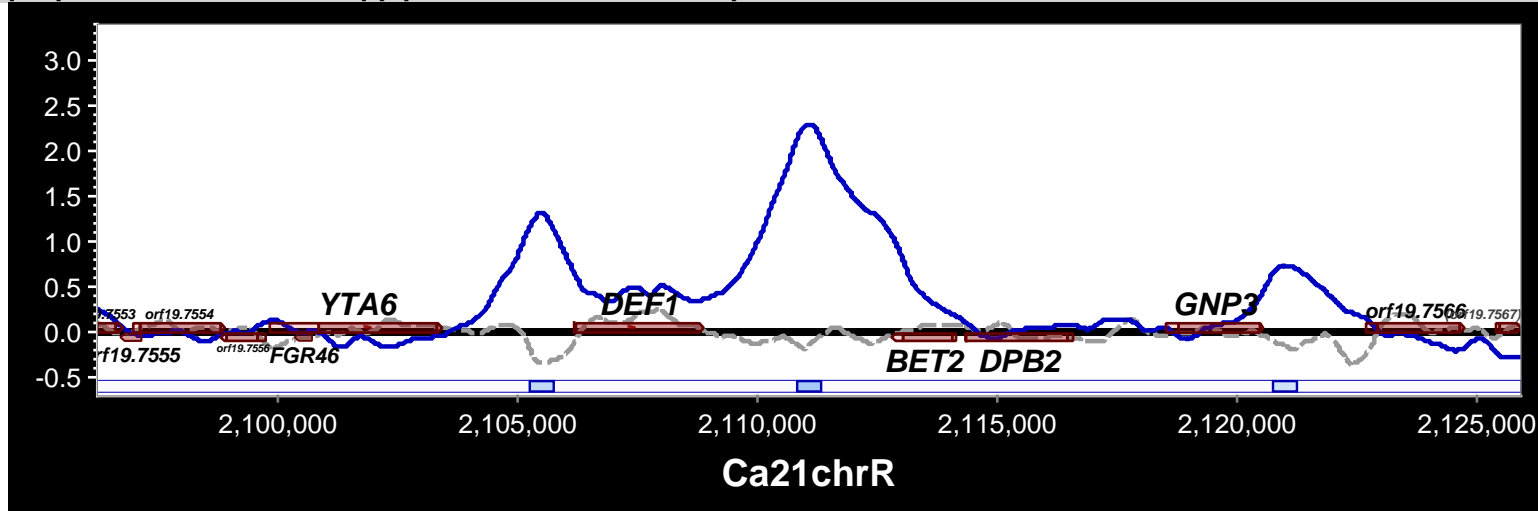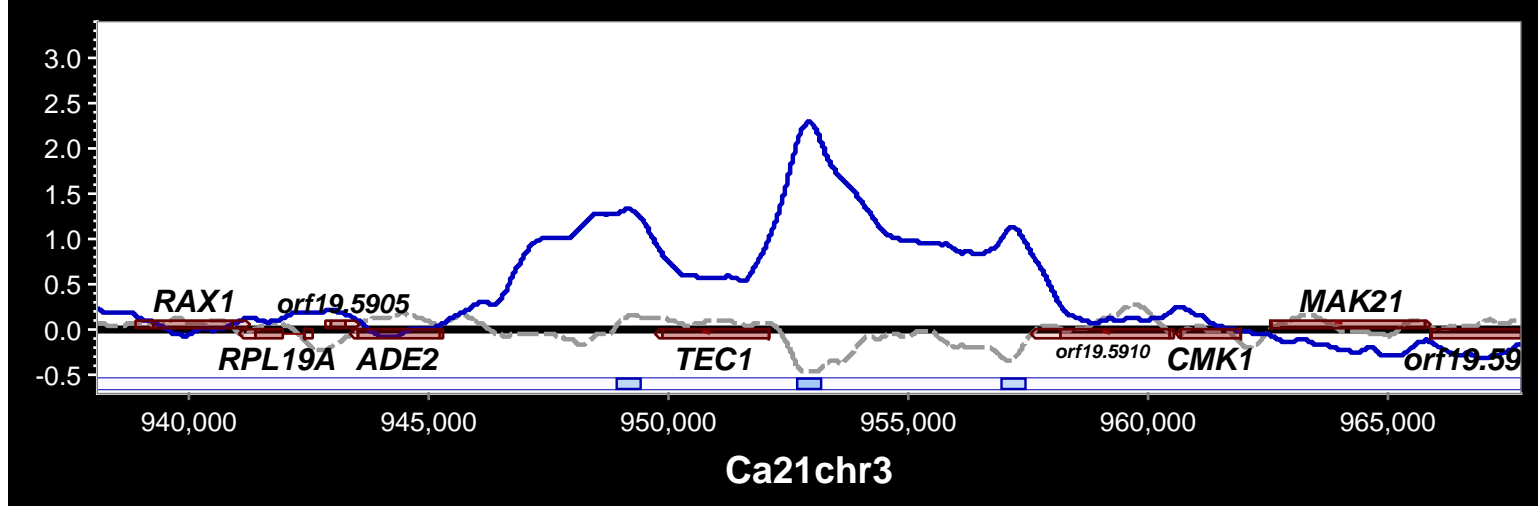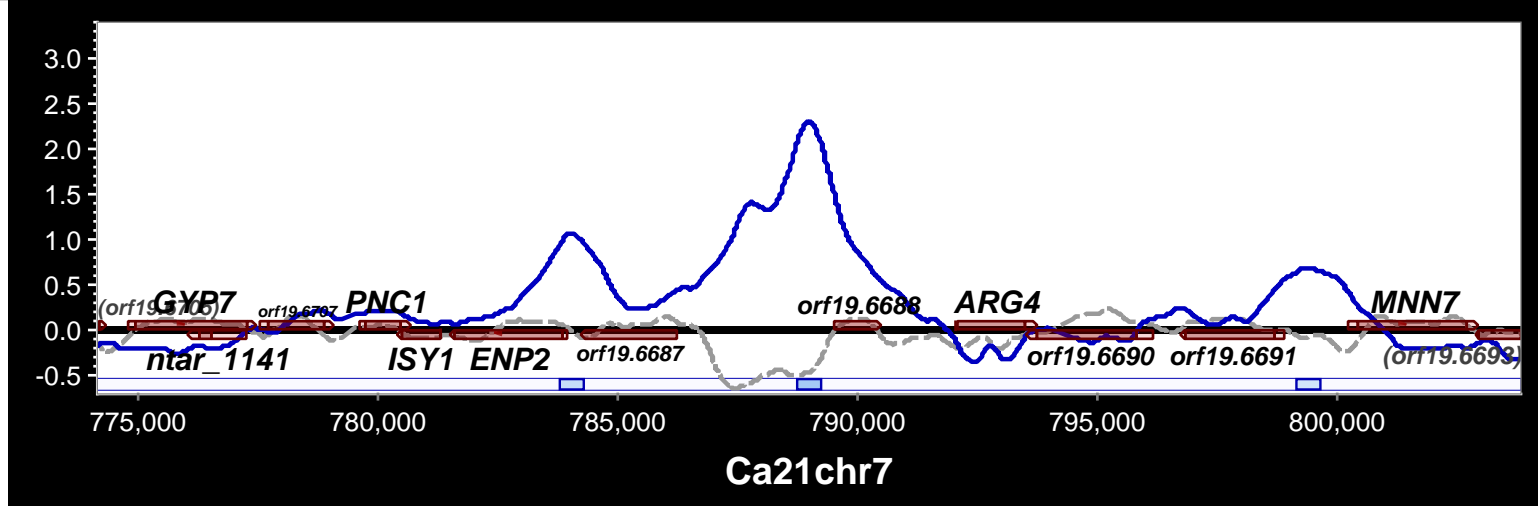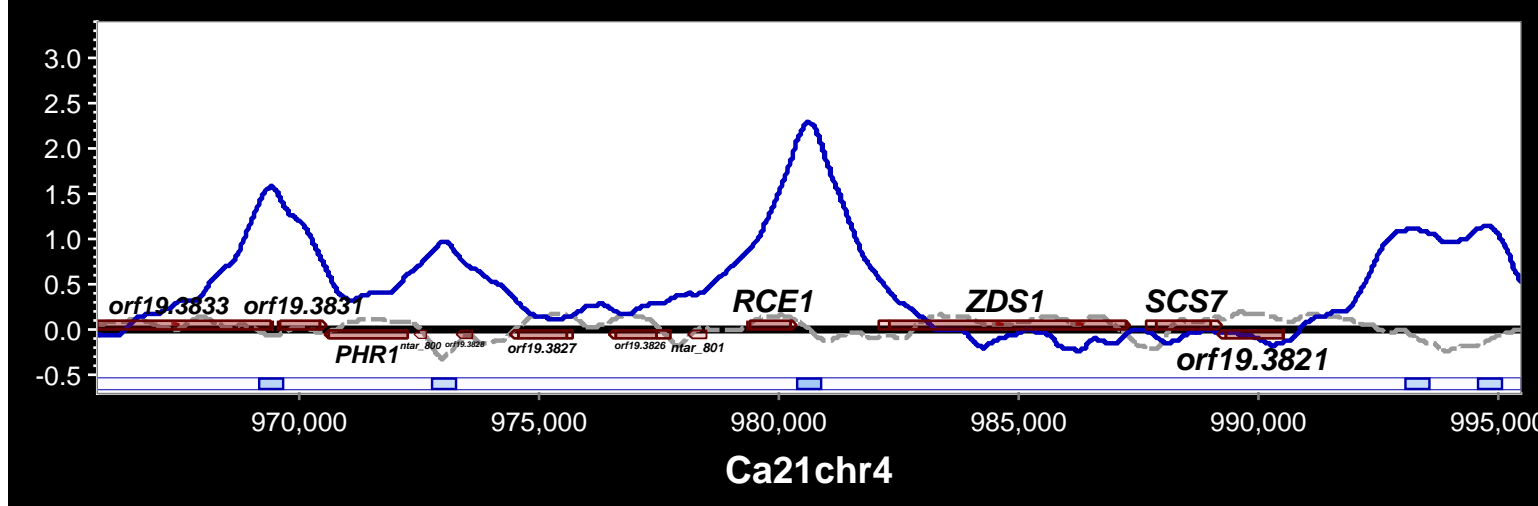





[2.254] Ca21chr1:2895981-2925664 [+] [STP2, orf19.4960, orf19.4962, orf19.4959, orf19.4963]

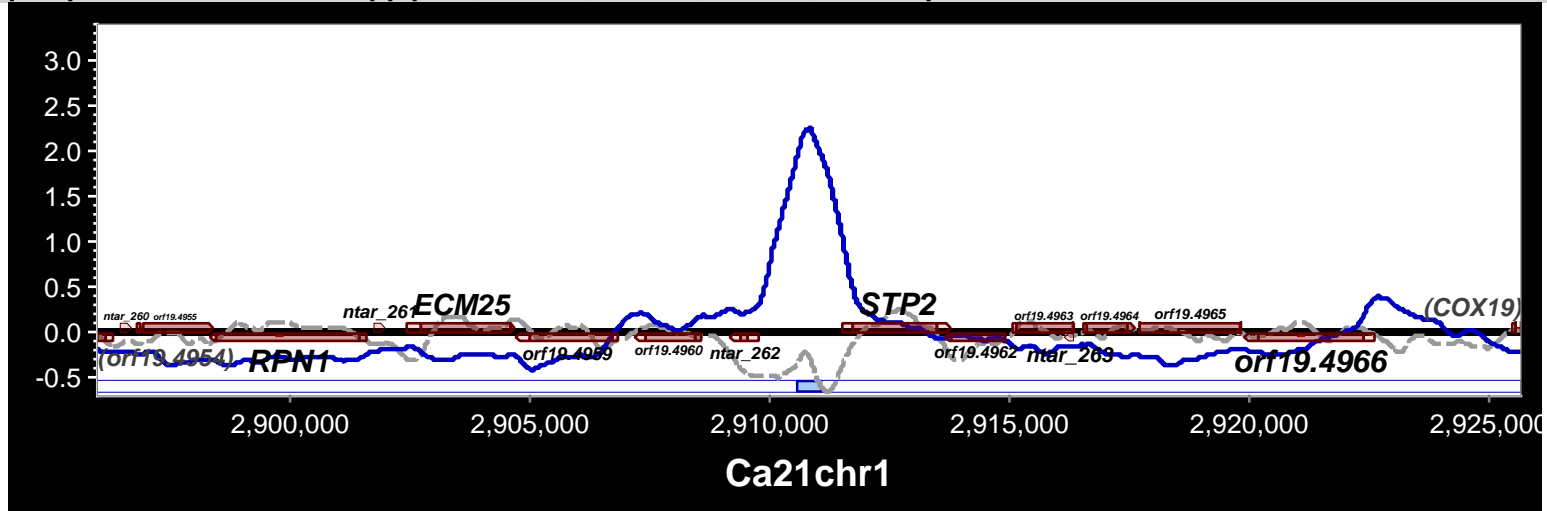

[2.248] Ca21chr1:1508724-1538407 [+] [GAP4, TAF145, orf19.6194, orf19.6195, orf19.4455]

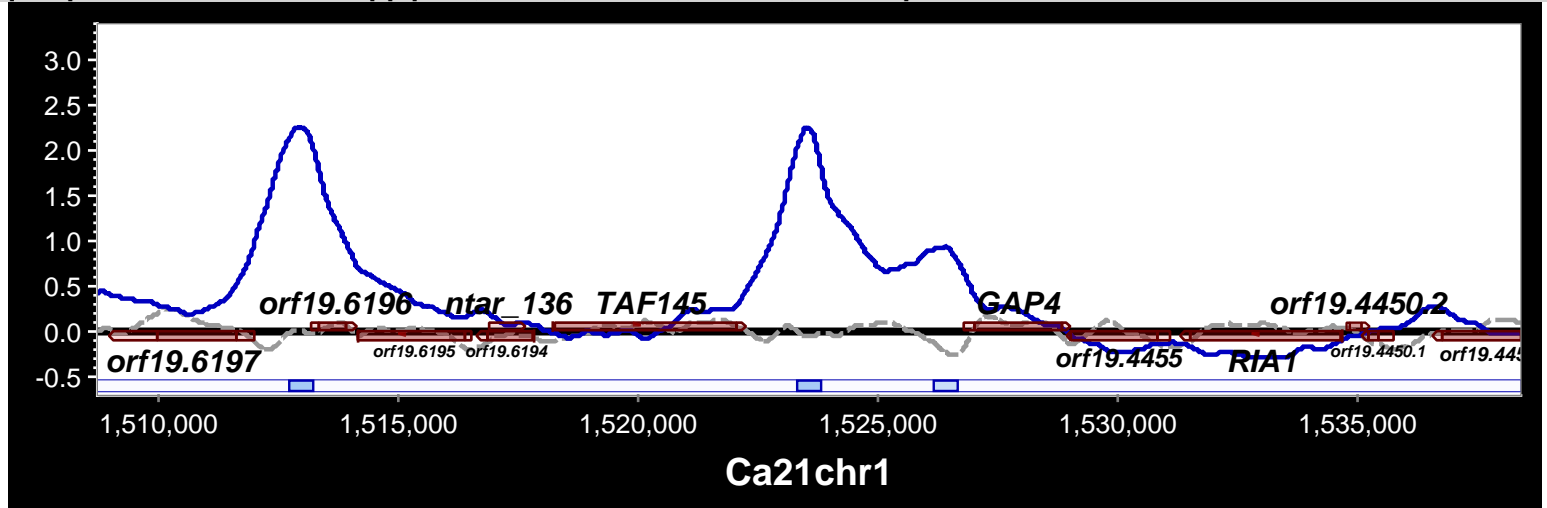

[2.239] Ca21chr1:429943-459626 [+] [SHA3, GAL1, orf19.3671, GAL10, HGT2]

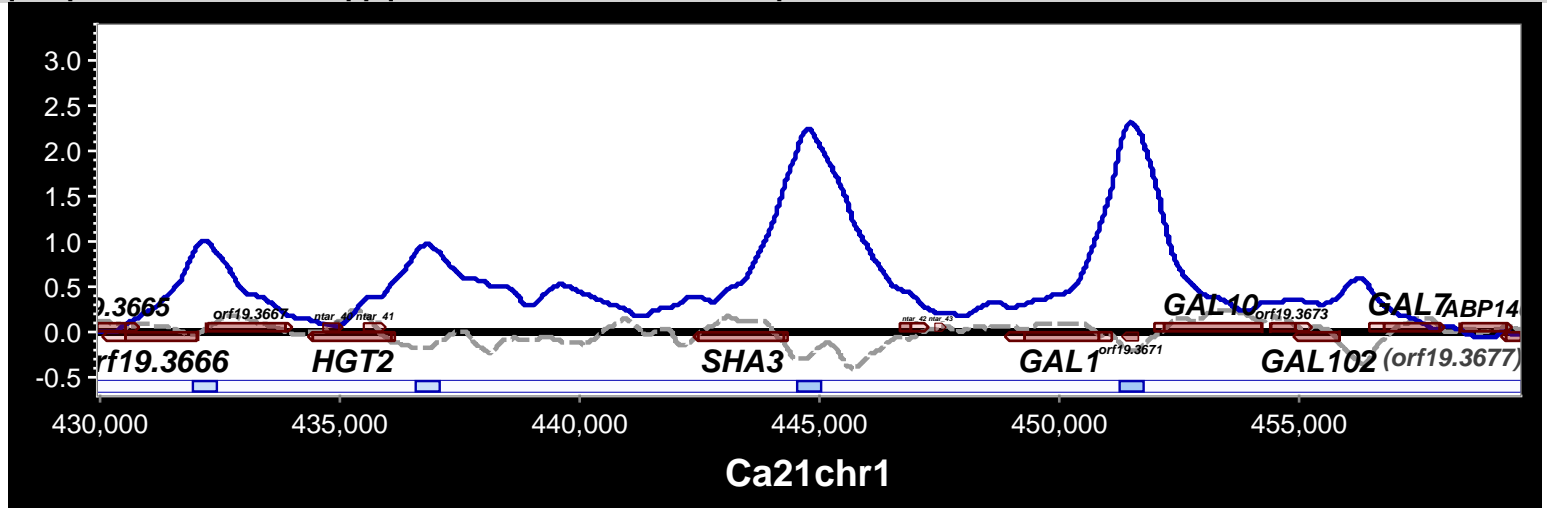

[2.236] Ca21chr6:303647-333330 [+] [orf19.3431, orf19.3430, FGR47, orf19.3428, orf19.3427]

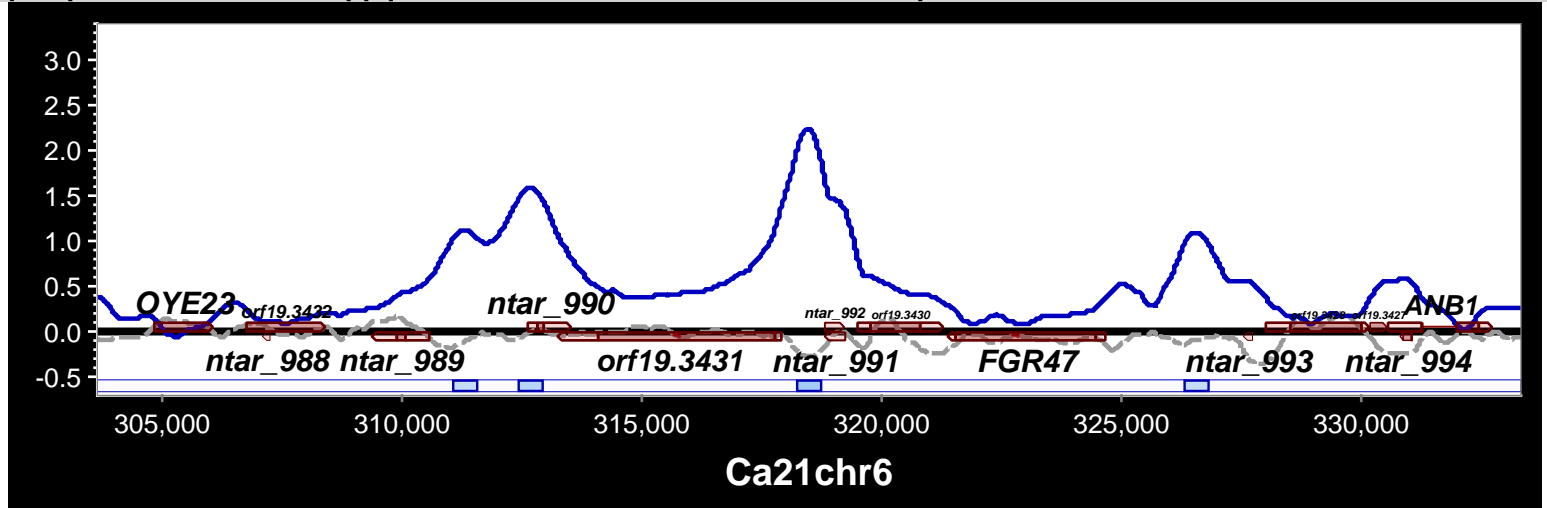

[2.23] Ca21chrR:1025974-1055657 [+] [RPS3, orf19.6311, MNT4, orf19.6313.2, RPB8]

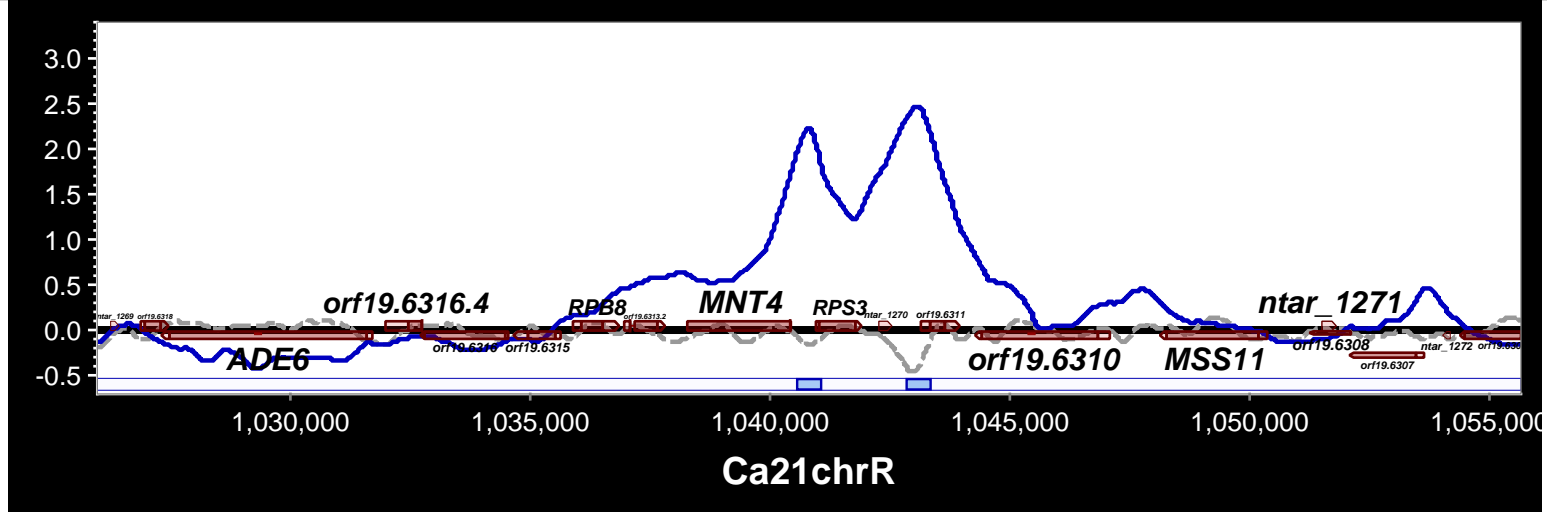

[2.222] Ca21chrR:2069936-2099619 [+] [IFA14, ALO1, PMT5, orf19.7552, orf19.7553]

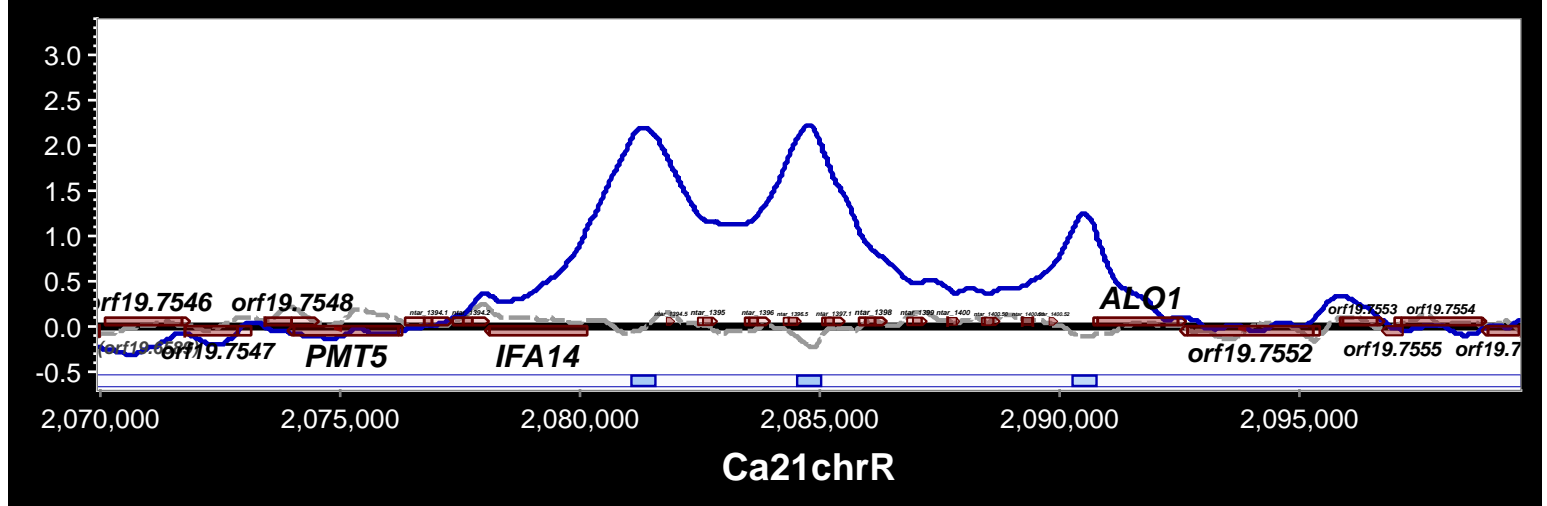

[2.218] Ca21chr1:498709-528392 [+] [GSC1, orf19.2930, orf19.2933, orf19.2934, RPL10]

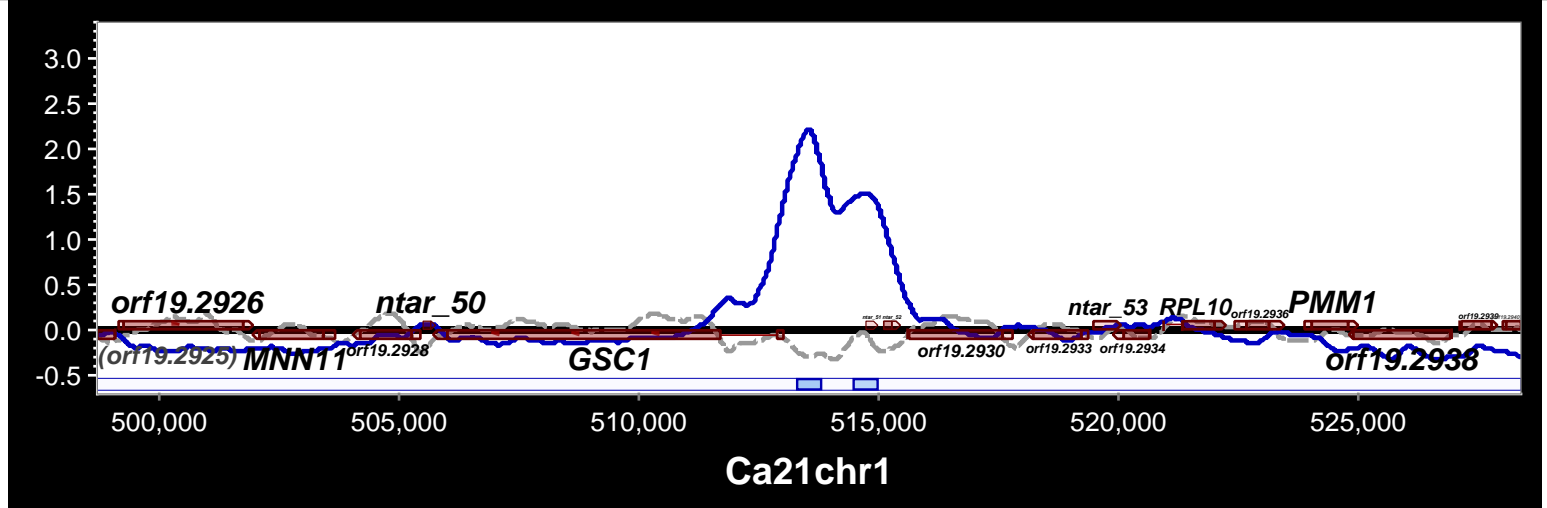

[2.208] Ca21chr1:1201818-1231501 [+] [POL32, PRN1, PRN2, orf19.2468, PRN3]

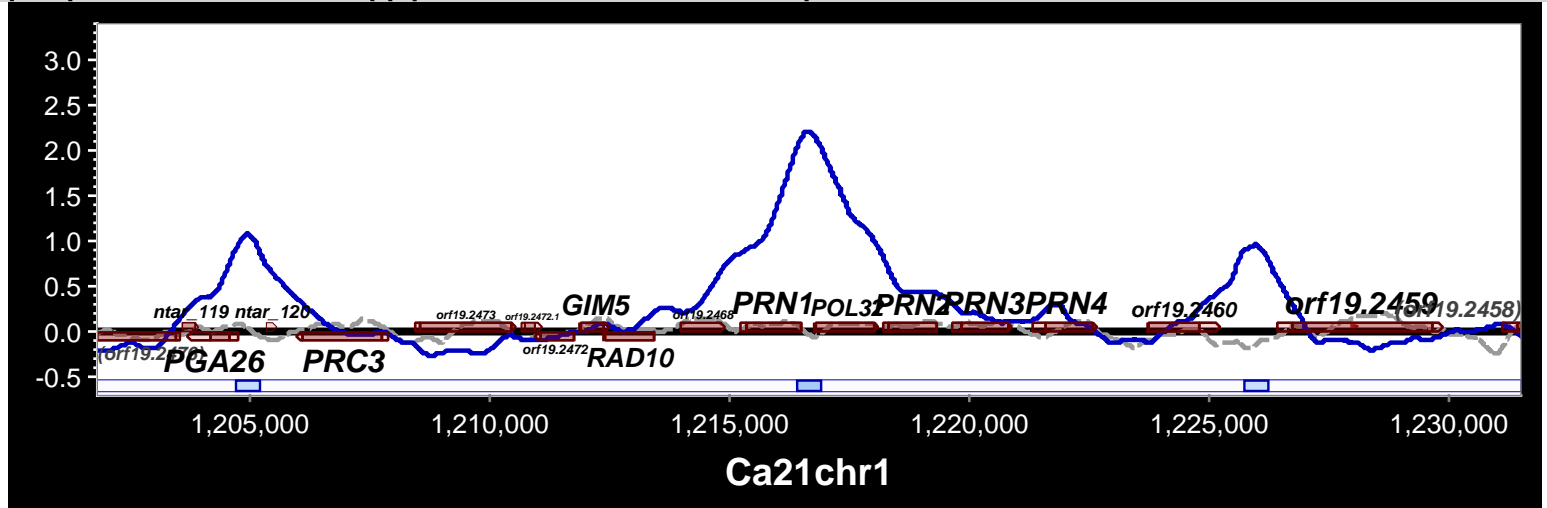

[2.207] Ca21chr7:902434-932117 [+] [NRG1, orf19.7151, orf19.7152, orf19.7149, orf19.7153]

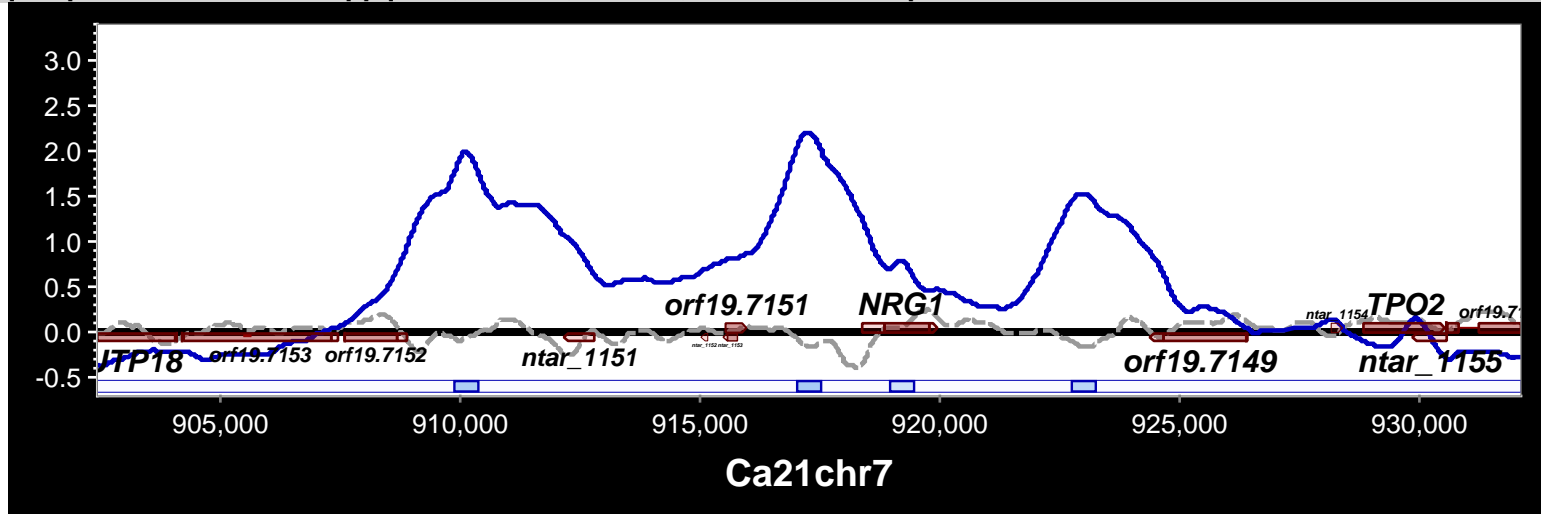

[2.2] Ca21chr1:1661035-1690718 [+] [VRG4, ADE4, orf19.1229, HAP2, orf19.1227]

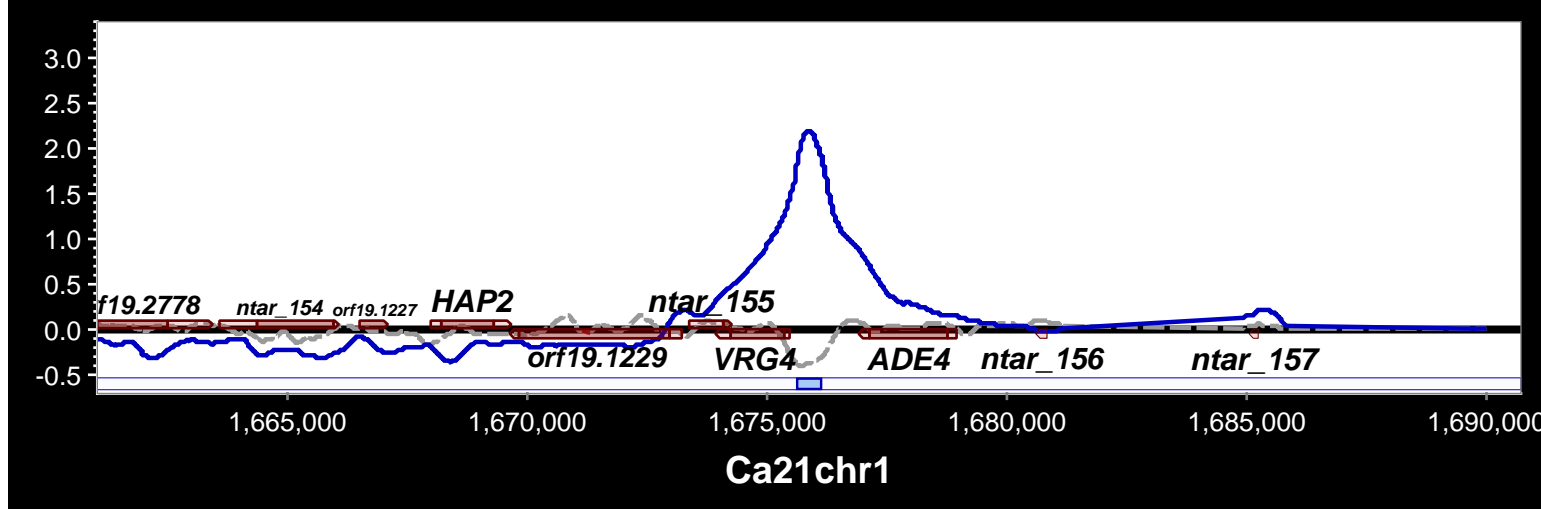

[2.199] Ca21chr2:949618-979301 [+] [orf19.4488, RPL17B, QCR8, ERG20, orf19.4492]

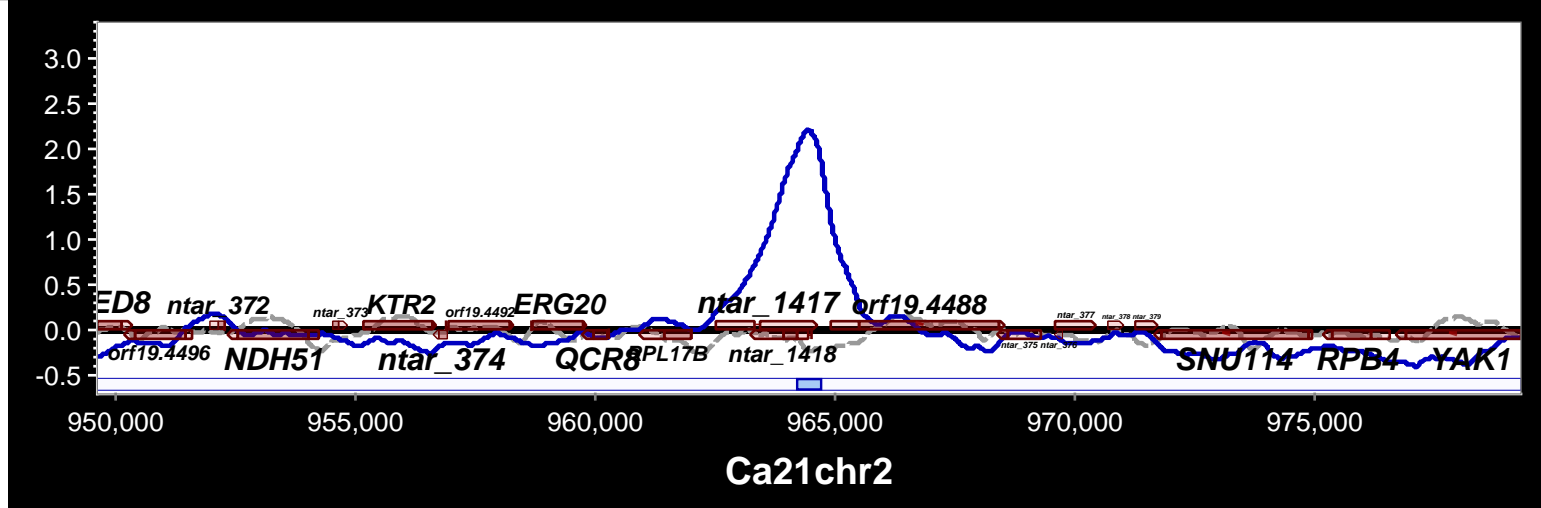

[2.195] Ca21chr1:1975532-2005215 [+] [IPT1, orf19.4768, orf19.4767, orf19.4766, orf19.4771]

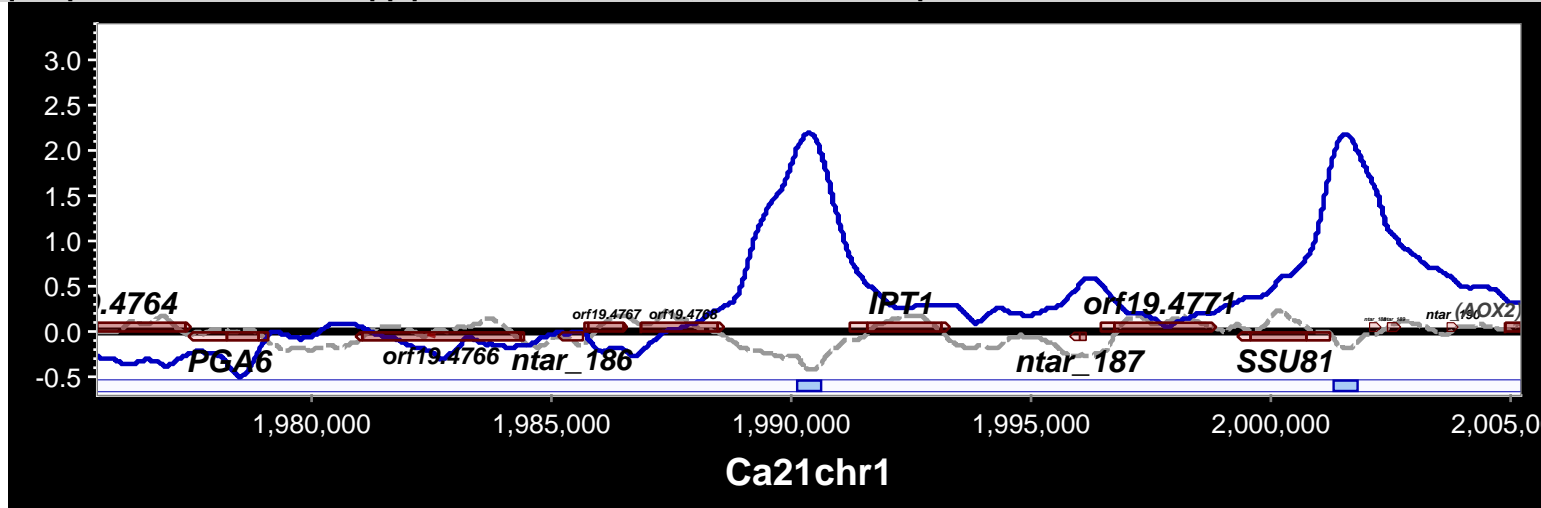

[2.195] Ca21chr4:1347365-1377048 [+] [GDH3, TRP5, orf19.4715, CWH41, orf19.4420]

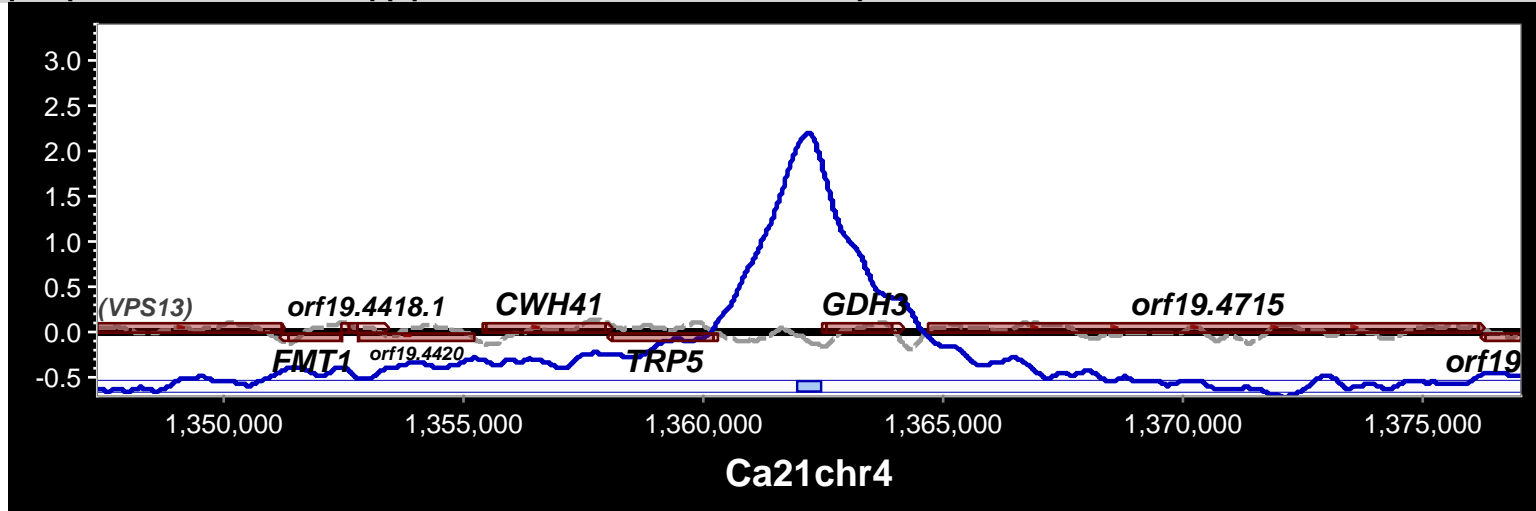

[2.188] Ca21chrR:1705108-1734791 [+] [EFG1, orf19.609, tg(GCC)1, orf19.612, orf19.607]

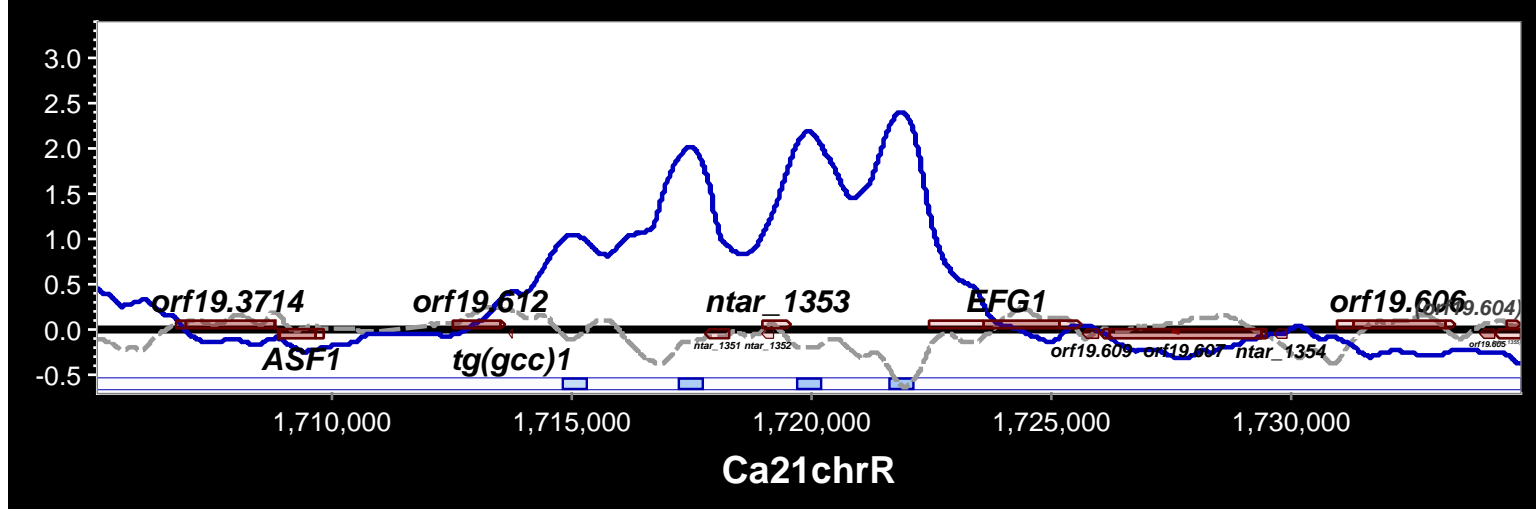

[2.187] Ca21chrR:2066481-2096164 [+] [IFA14, PMT5, orf19.7548, orf19.7547, ALO1]

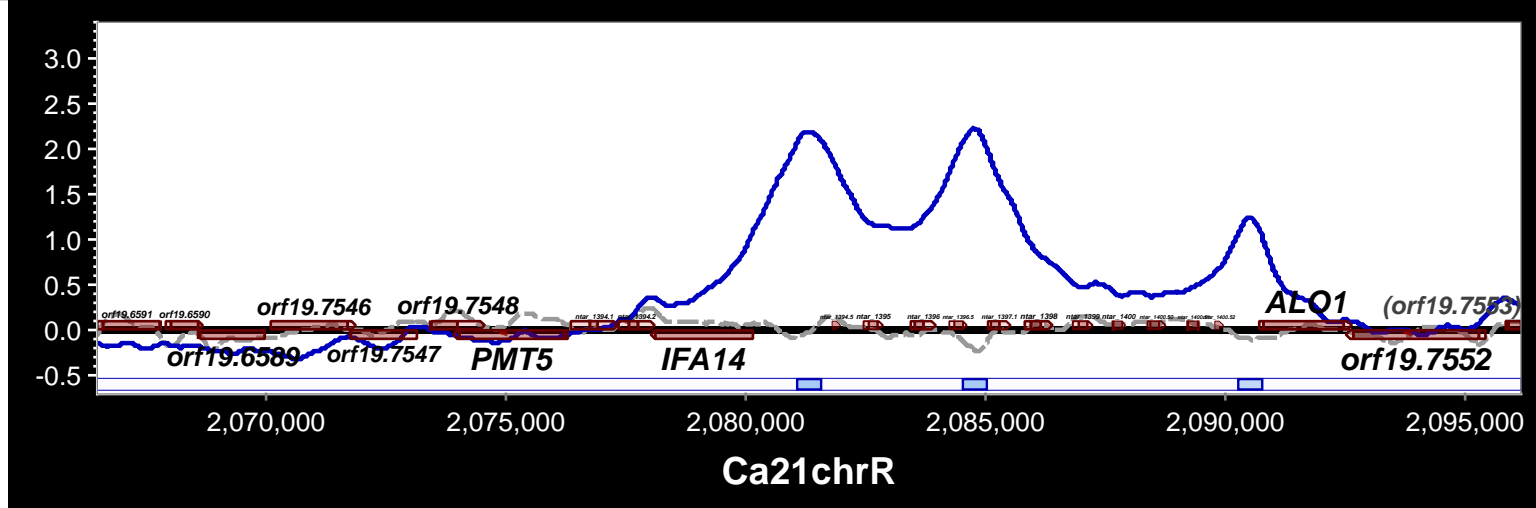

[2.179] Ca21chr3:1591815-1621498 [+] [SSN6, POS5, RPD31, orf19.6802, orf19.6797]

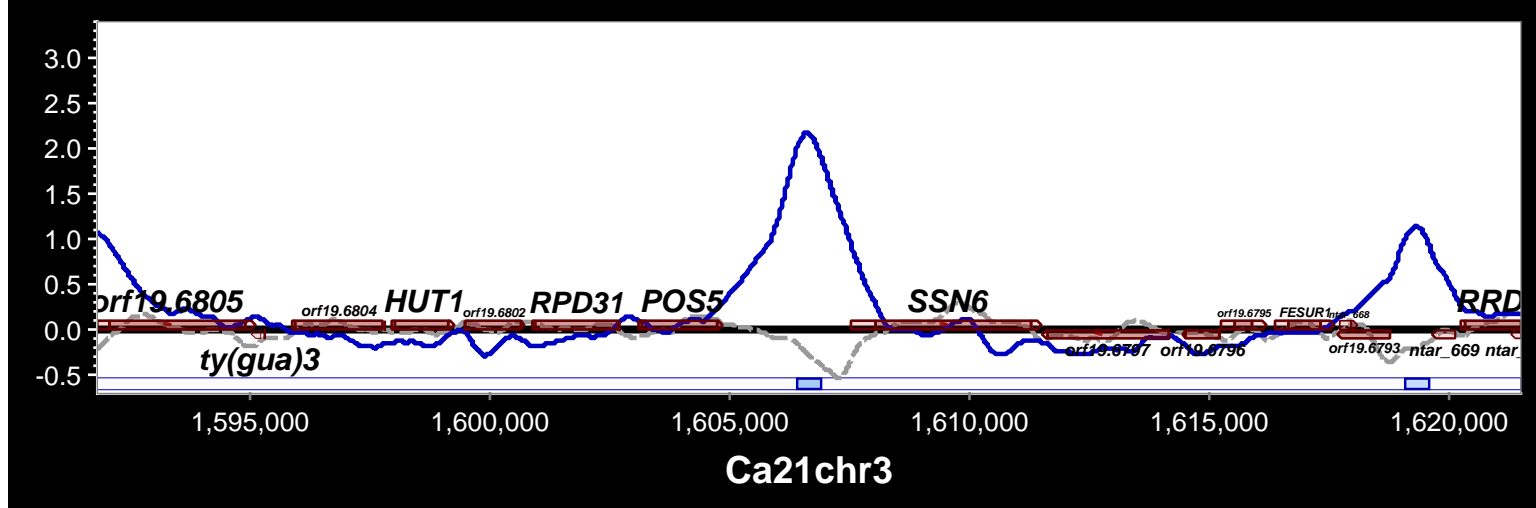

[2.178] Ca21chr1:1986717-2016400 [+] [SSU81, AOX2, orf19.4771, AOX1, CTA8]

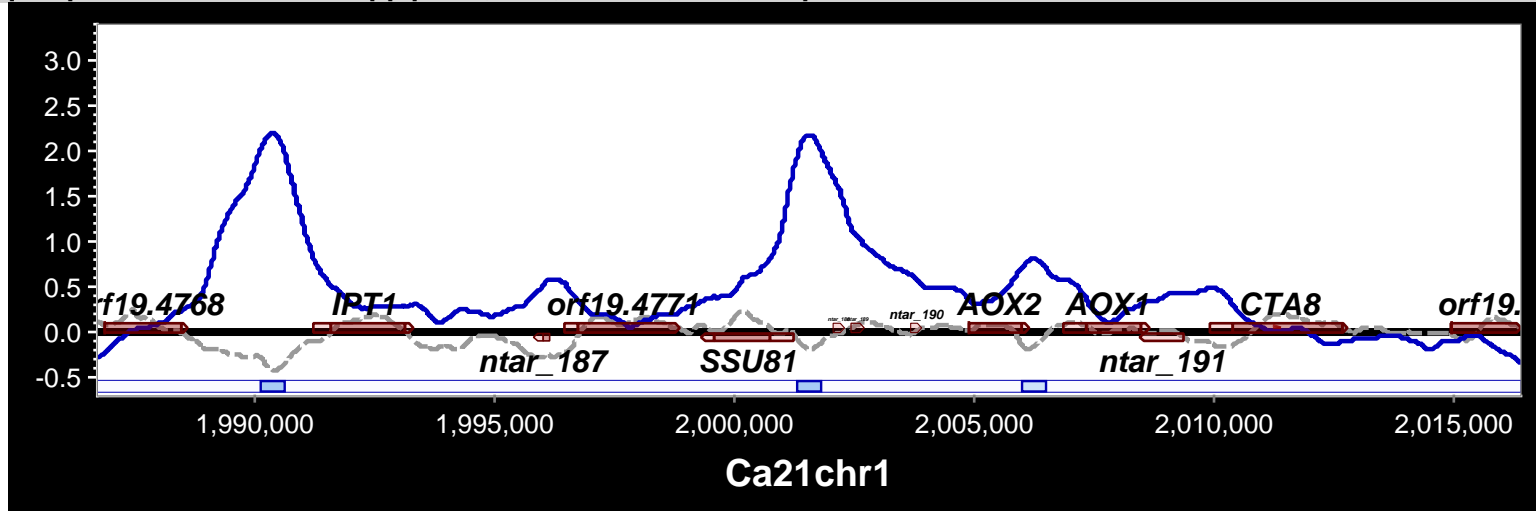

[2.164] Ca21chr1:215854-245537 [+] [orf19.3302, orf19.3303, orf19.3304, orf19.3301, orf19.3305]

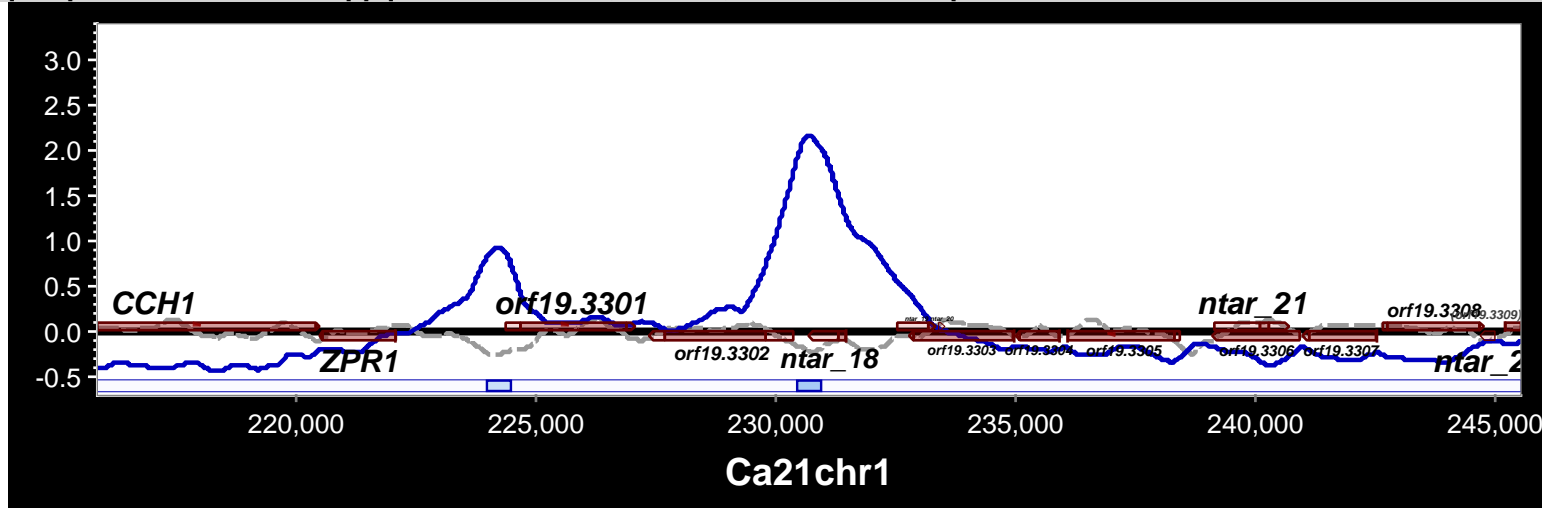

[2.164] Ca21chr7:26317-56000 [+] [HGT12, orf19.7095, orf19.7096, HGT13, orf19.7092]

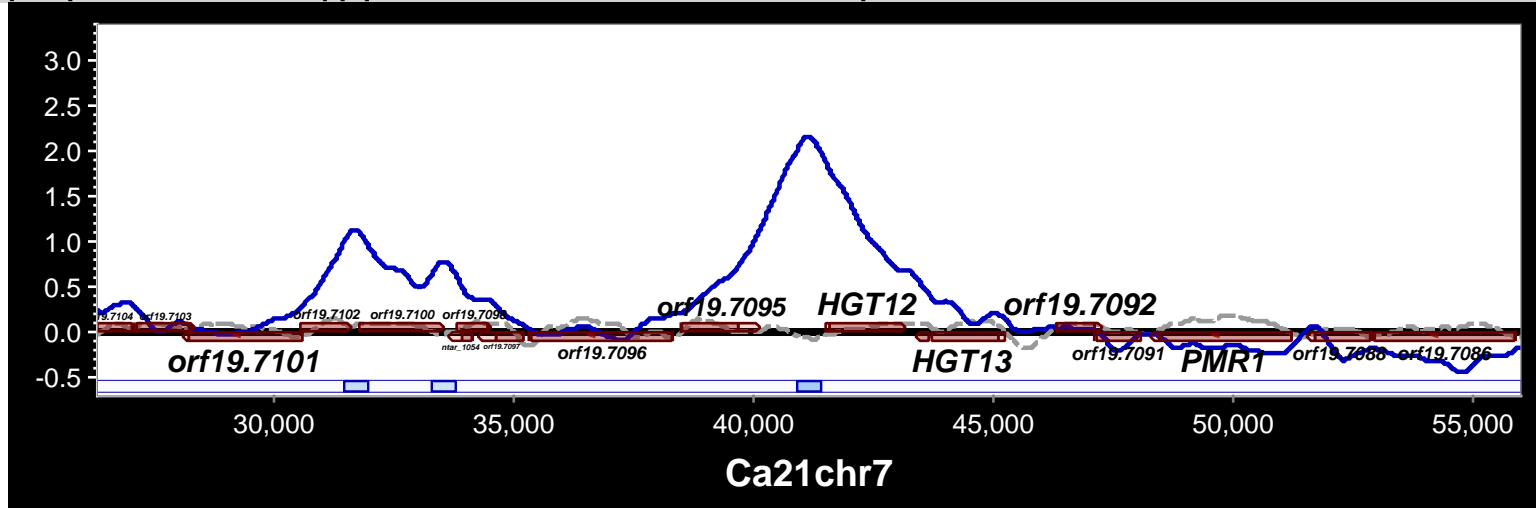

[2.159] Ca21chr1:2213308-2242991 [+] [WOR1, orf19.4883, MIR1, orf19.4882, orf19.4886]

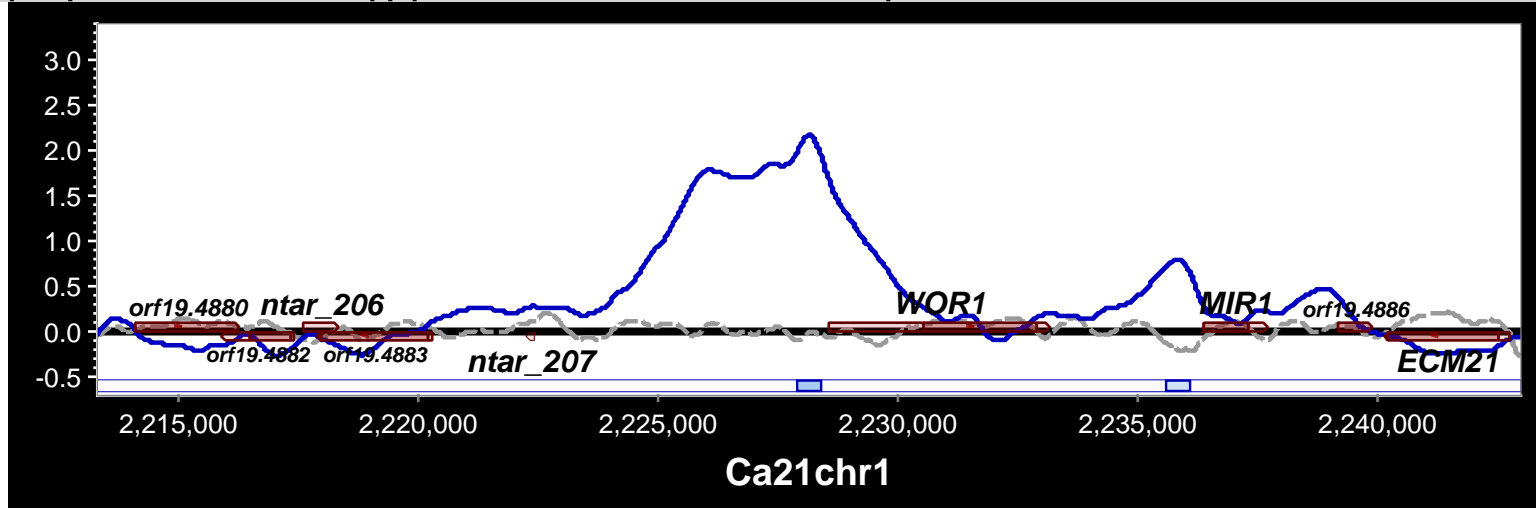

[2.137] Ca21chr1:2037539-2067222 [+] [orf19.4792, orf19.4793, orf19.4791, orf19.4789, orf19.4795]

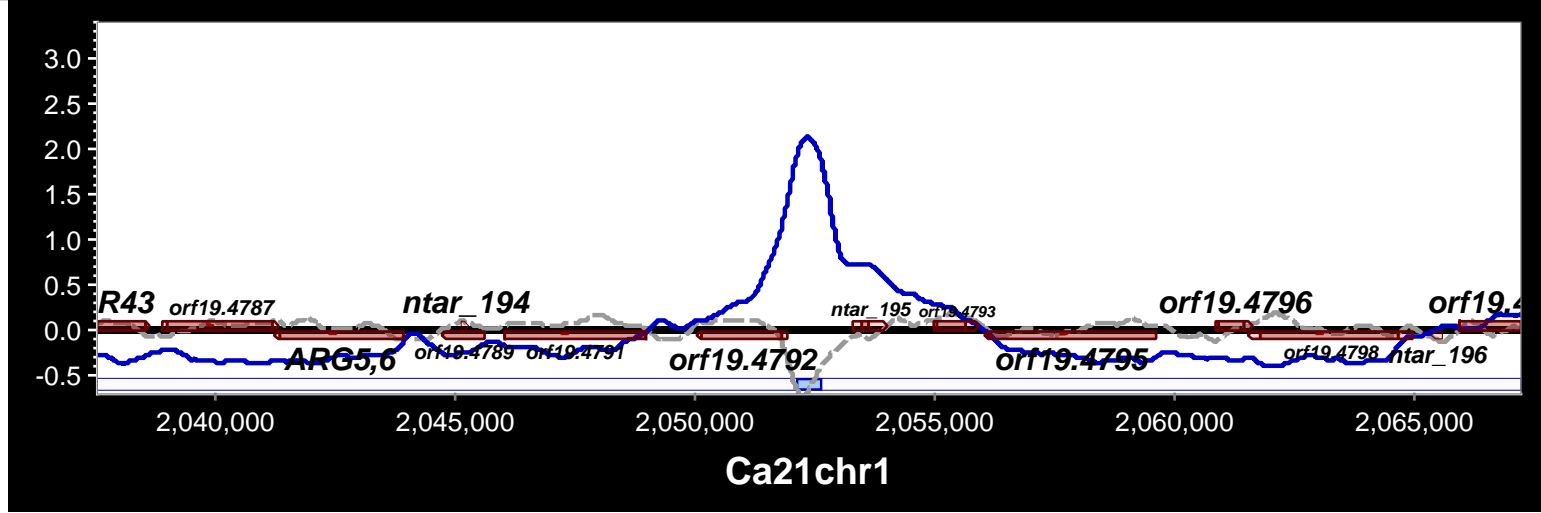

[2.137] Ca21chr2:728231-757914 [+] [ADAEC, orf19.867, RAD32, orf19.864, orf19.863]

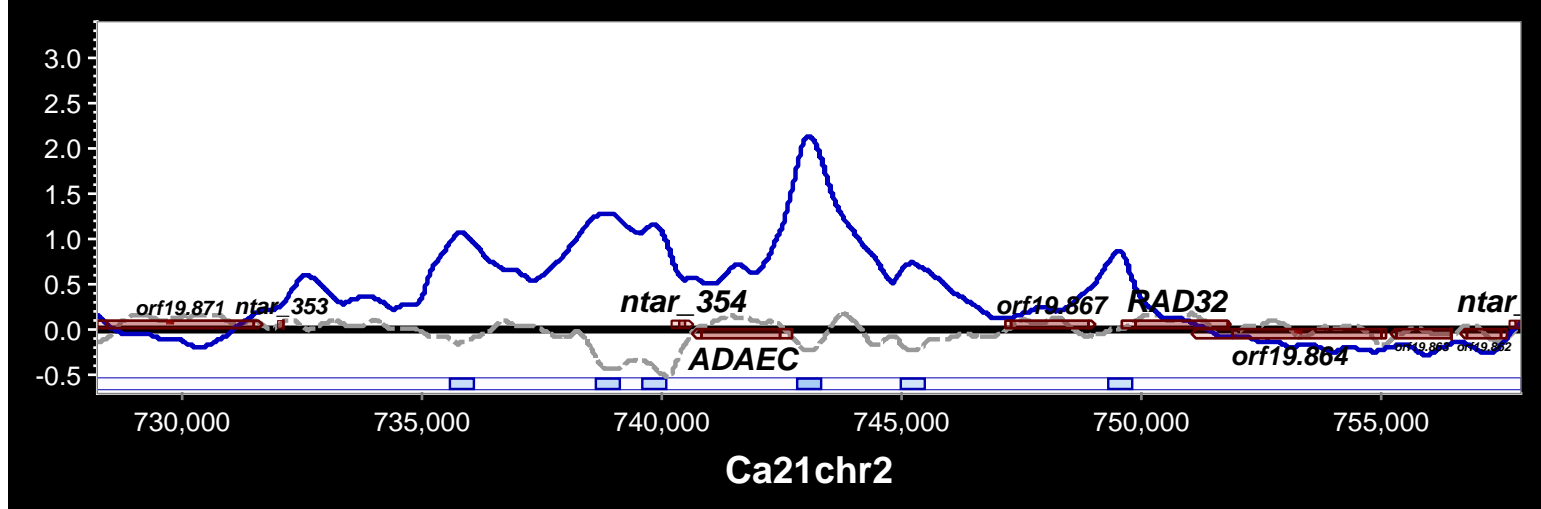

[2.124] Ca21chr1:3026087-3055770 [+] [PDX1, orf19.5022, DAL7, orf19.5019]

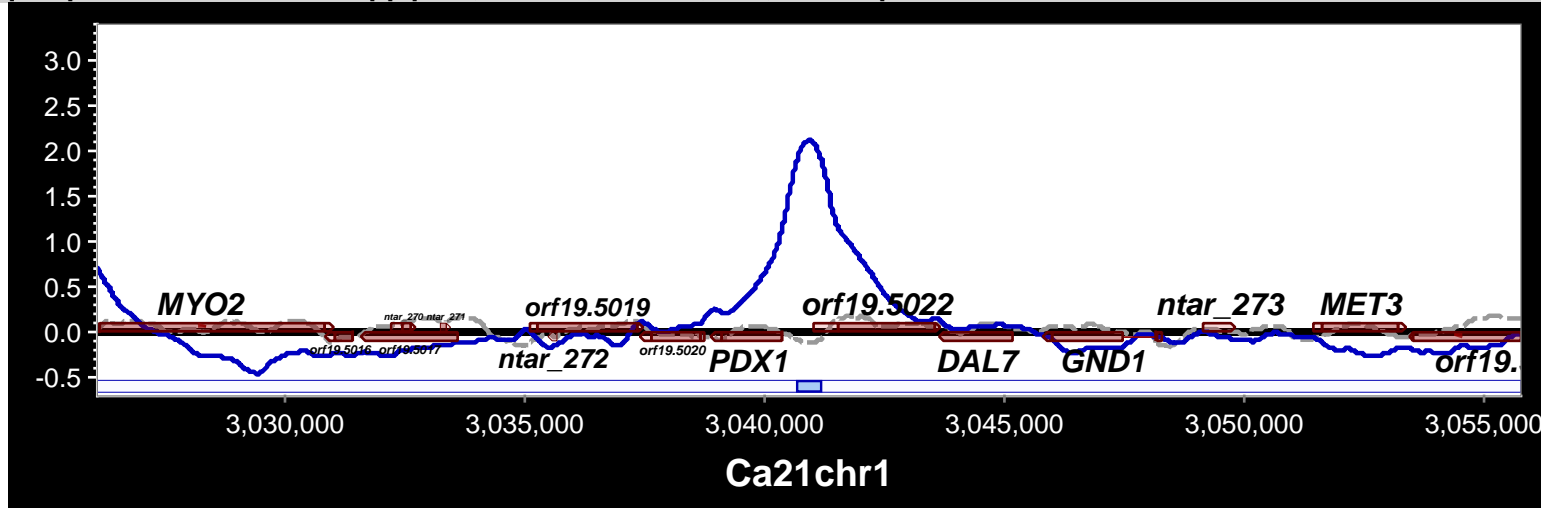

[2.124] Ca21chr4:4467-34150 [+] [RBT5, PGA7, FRP1, orf19.5633, HIS4]

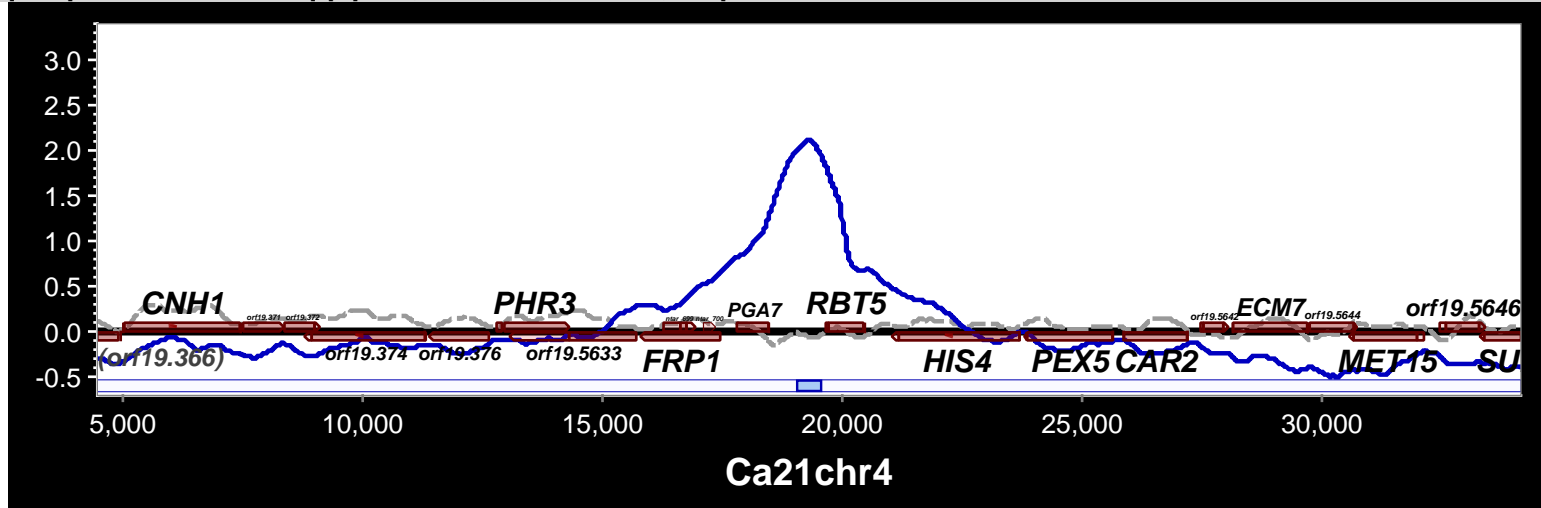

[2.101] Ca21chrR:1673718-1703401 [+] [YHB1, orf19.3706, SAP2, PTC6, orf19.3704.1]

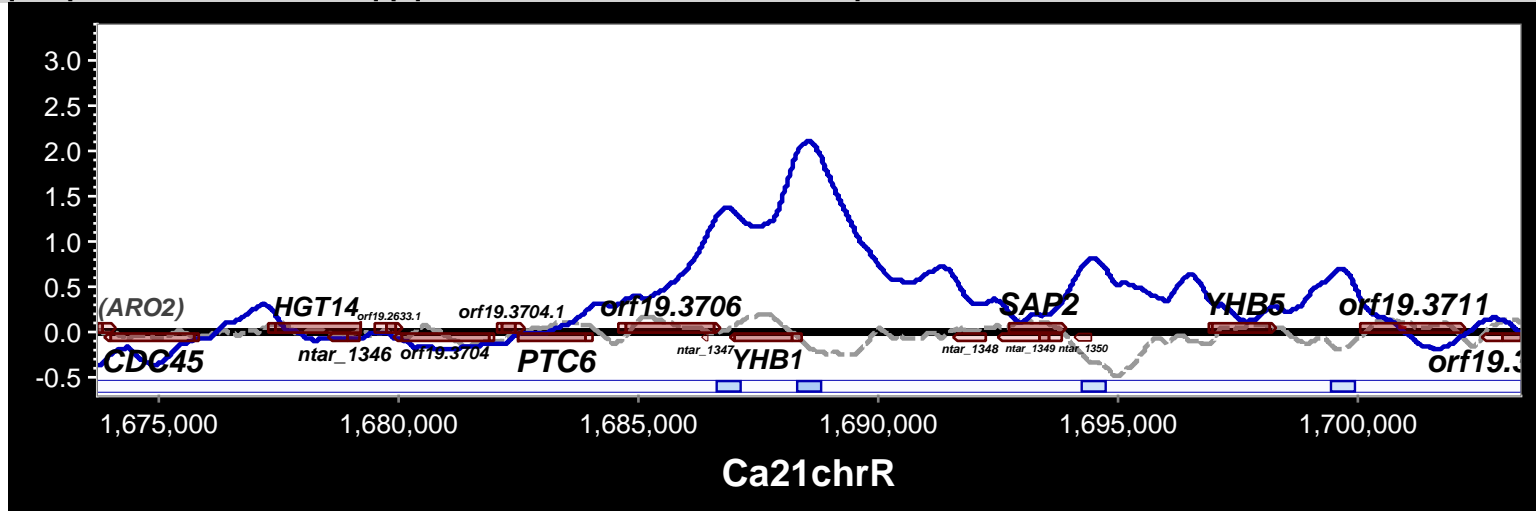

[2.099] Ca21chr1:2275140-2304823 [+] [orf19.4906, orf19.4905, orf19.4907, orf19.4904, orf19.4908]

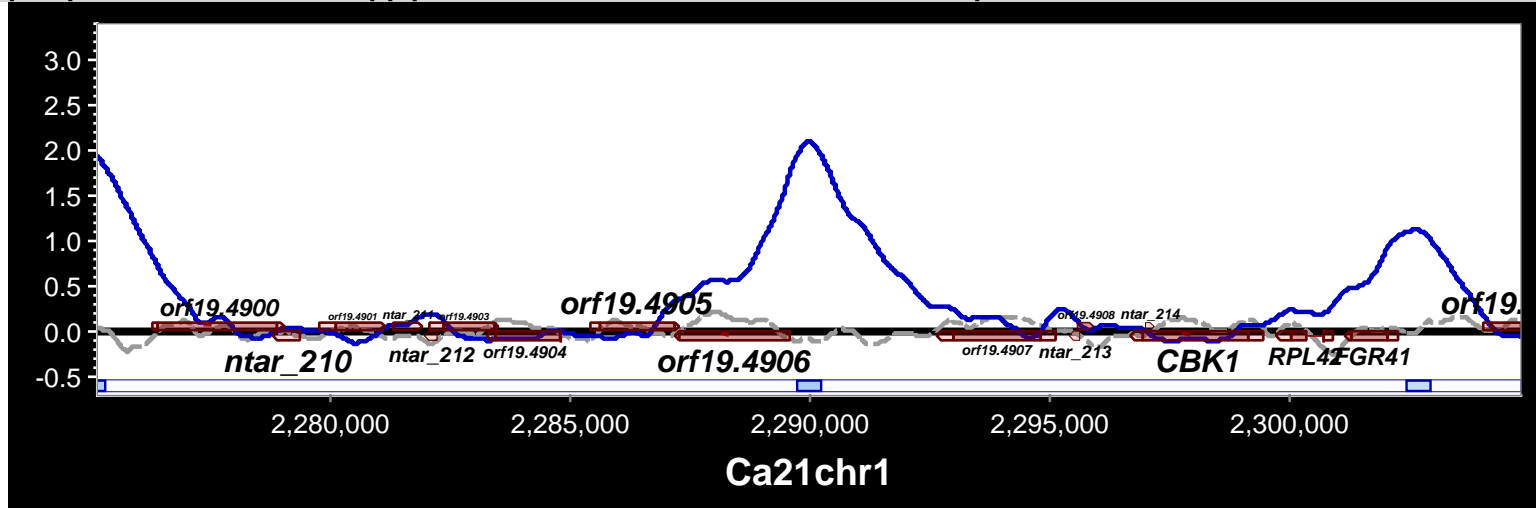

[2.097] Ca21chrR:1180677-1210360 [+] [orf19.5843, tC(GCA)1, tC(GCA)2, orf19.5844, orf19.6653]

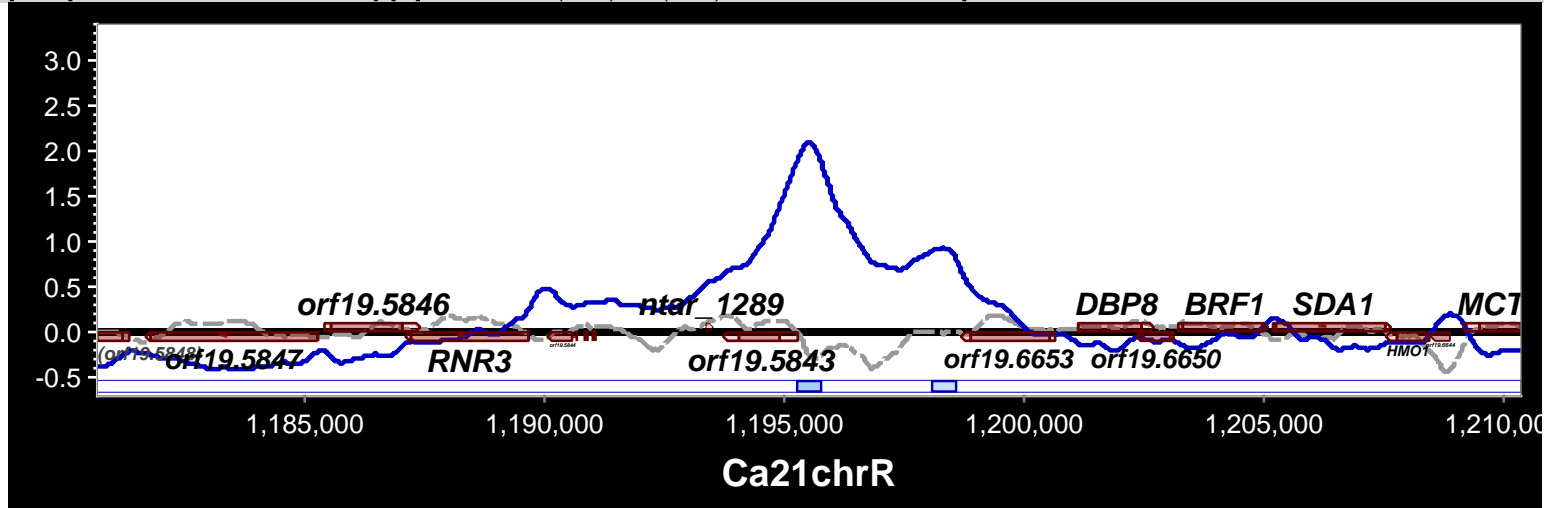

[2.075] Ca21chrR:1983162-2012845 [+] [orf19.7337, orf19.7336, BGL22, orf19.7340, PRE8]

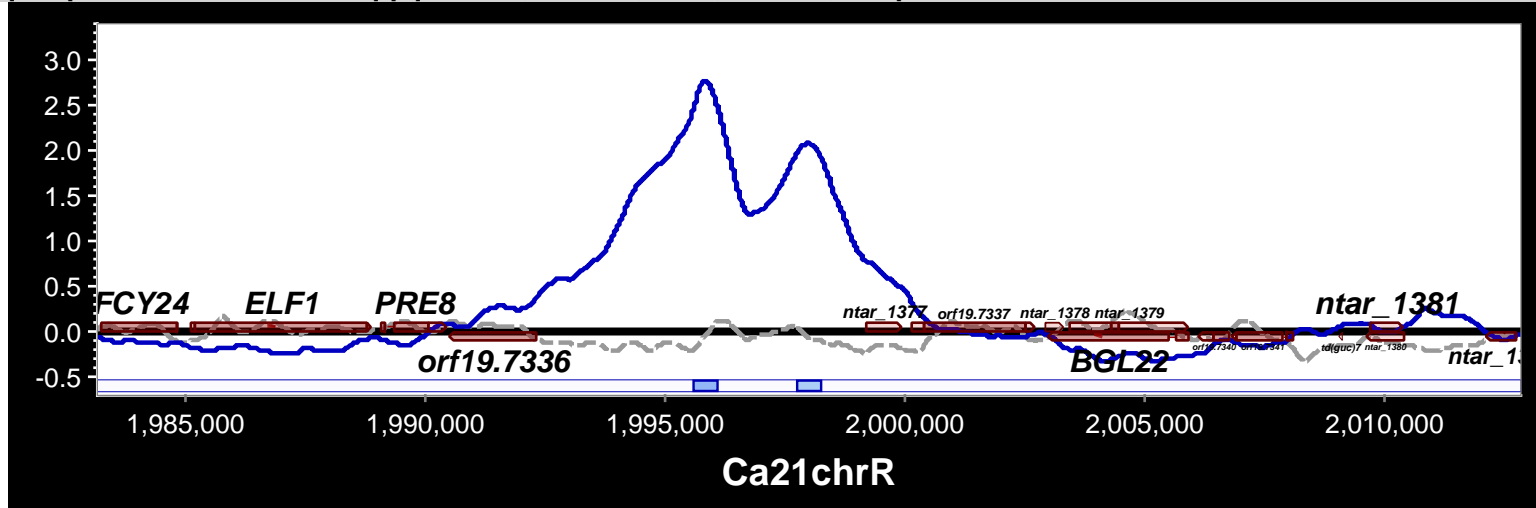



[2.064] Ca21chr1:22234-51917 [+] [PHR2, orf19.6082, orf19.6083, orf19.6084, orf19.6080]

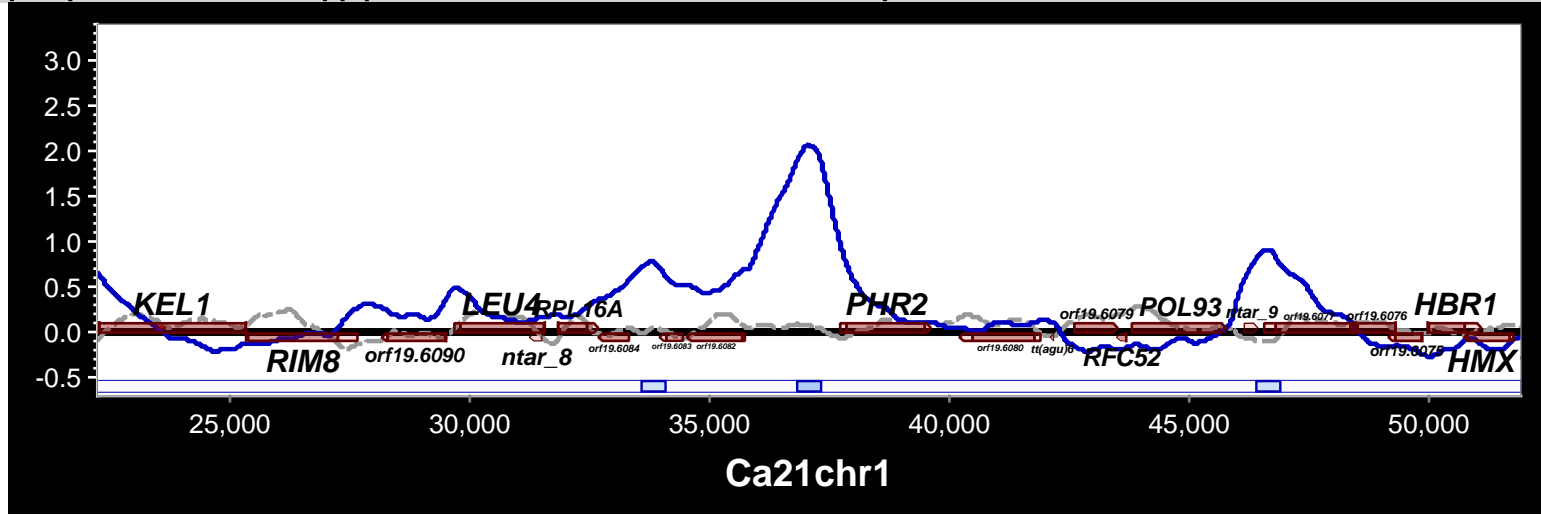

[2.055] Ca21chr5:485483-515166 [+] [PTH2, PTH1, THR4, orf19.4234, PDE1]

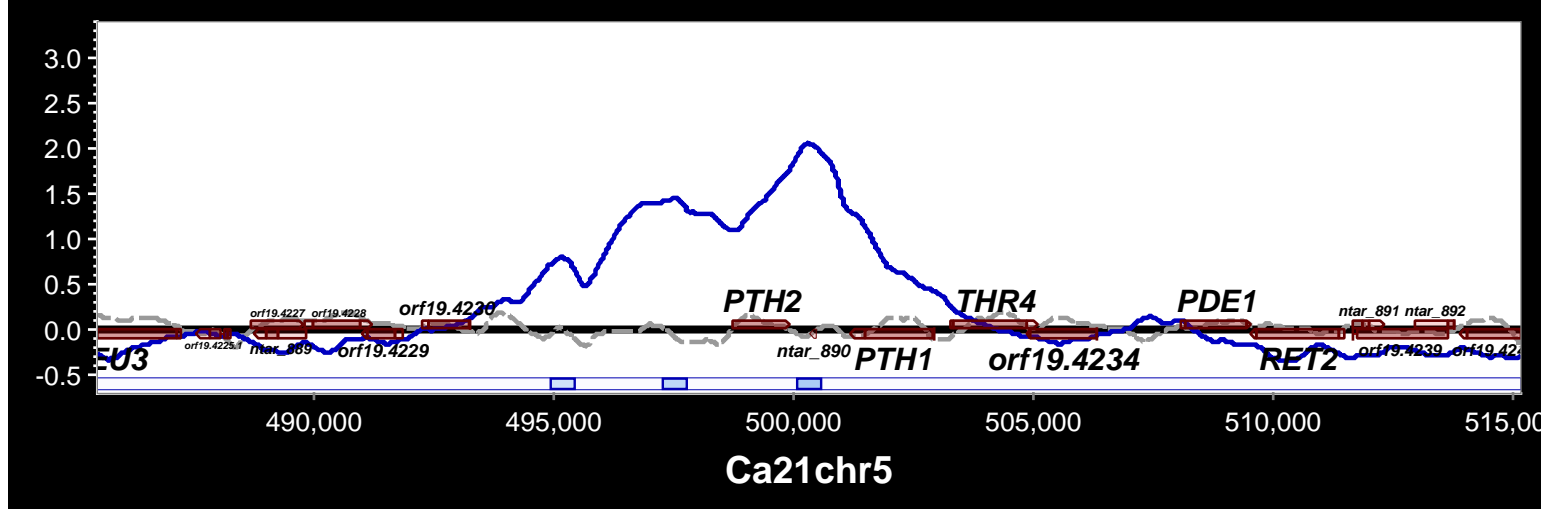

[2.034] Ca21chr1:1075437-1105120 [+] [orf19.449, orf19.450, orf19.448, orf19.446.2, GAT2]

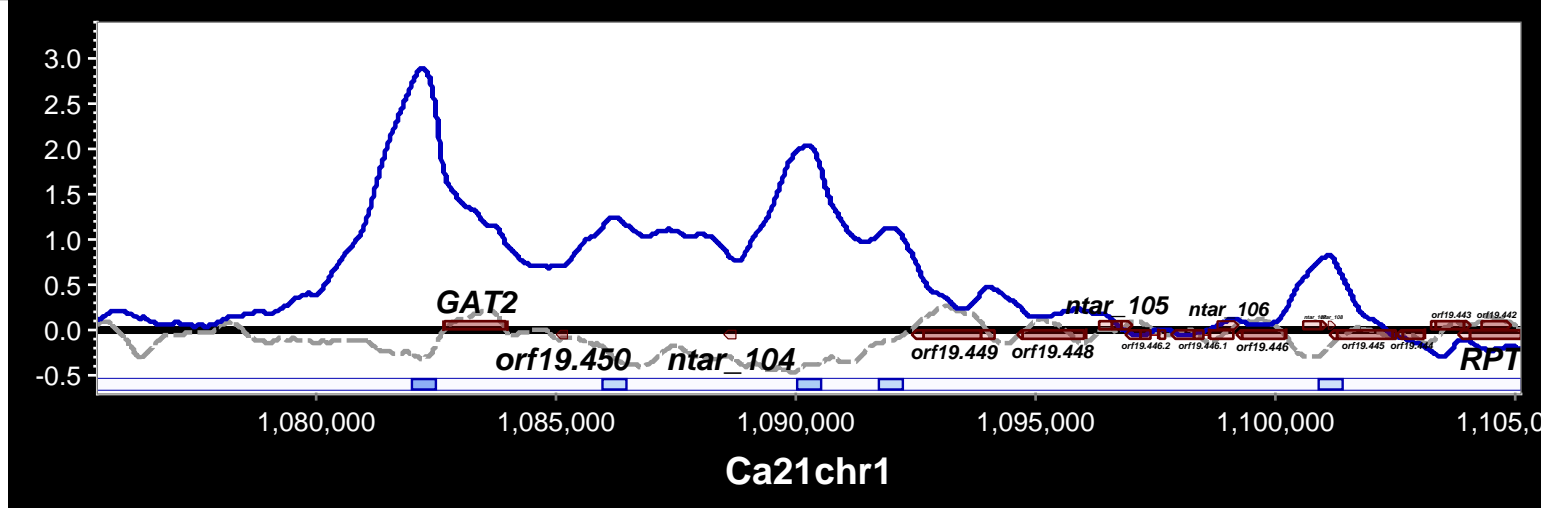

[2.032] Ca21chr2:1132021-1161704 [+] [ts(AGA)4, orf19.6874, orf19.6873.1, RPS8A, VPS35]

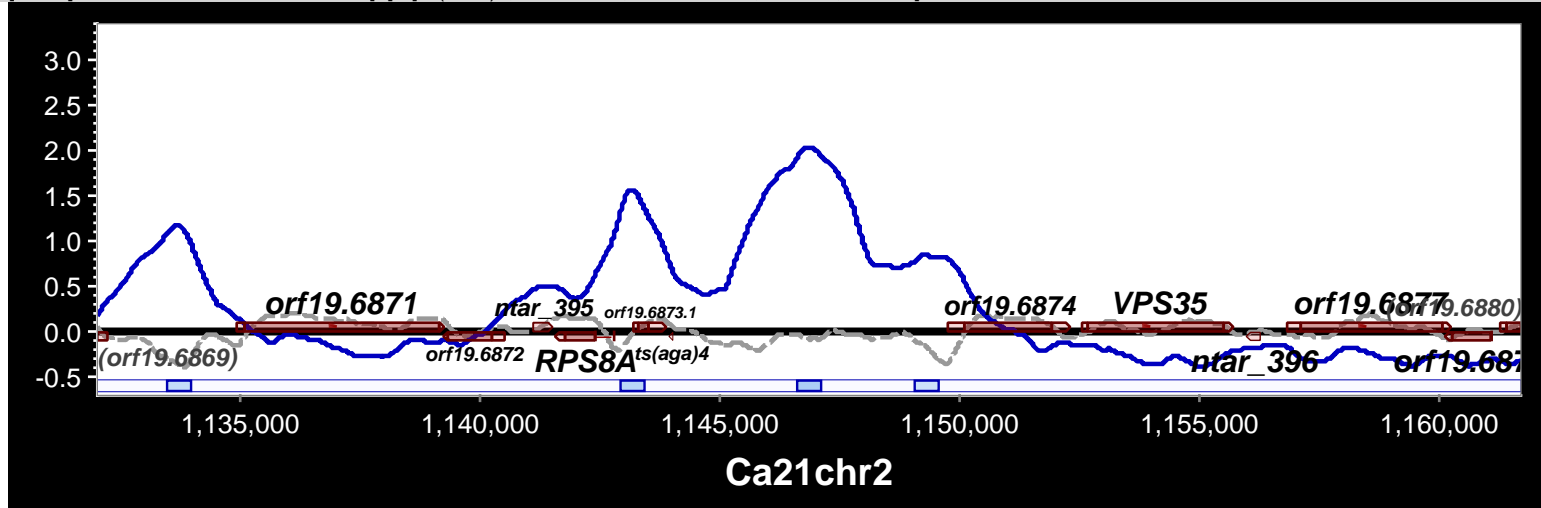

[2.023] Ca21chrR:1702641-1732324 [+] [tG(GCC)1, orf19.612, EFG1, ASF1, orf19.609]

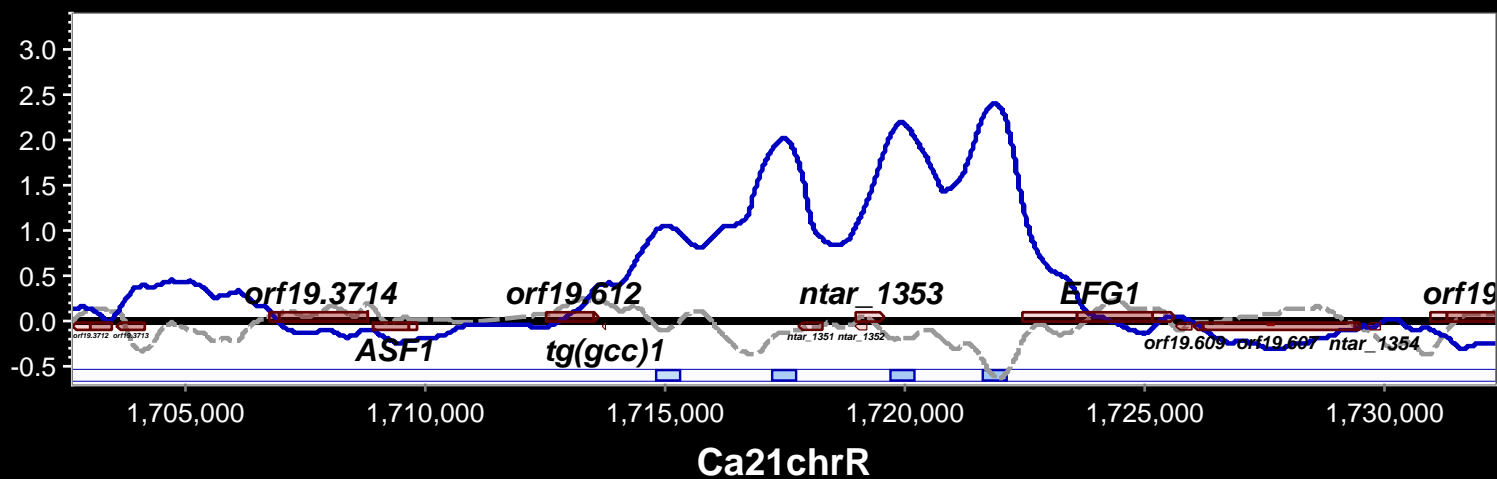

[2.021] Ca21chr4:218522-248205 [+] [CRD2, orf19.4675, orf19.4676, orf19.4677, BMT9]

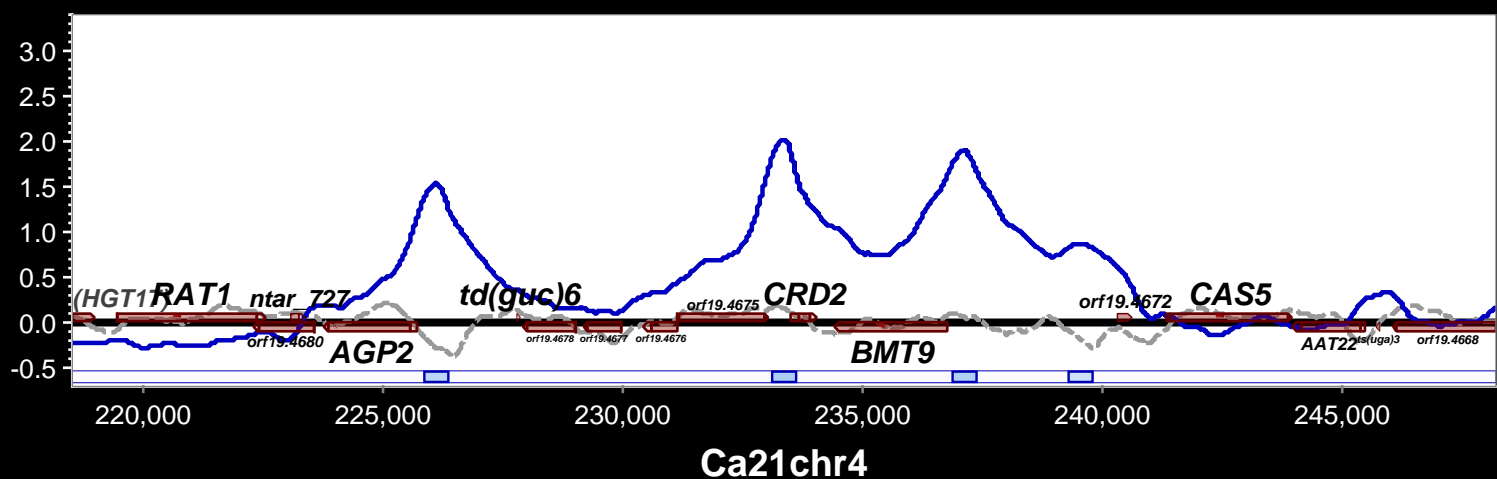

[2.009] Ca21chr1:3044072-3073755 [+] [orf19.5026, tA(AGC)7, LCB2, MODF, orf19.5030]

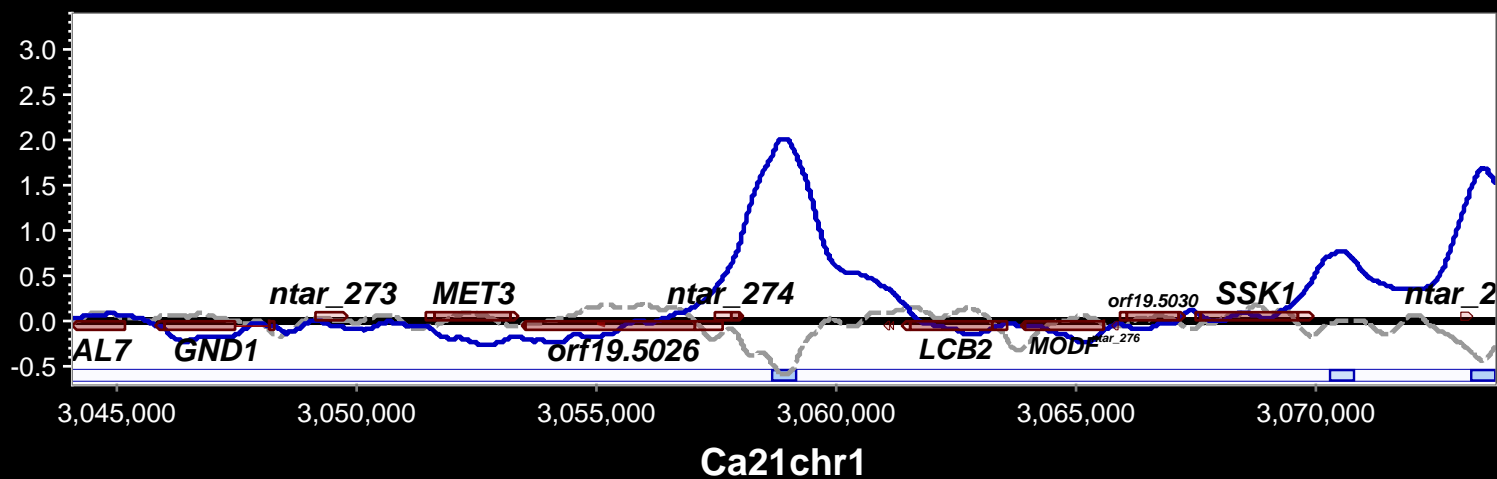

[2.009] Ca21chr4:1427199-1456882 [+] [PRI2, CDC68, CEK1, MET13, CSO99]

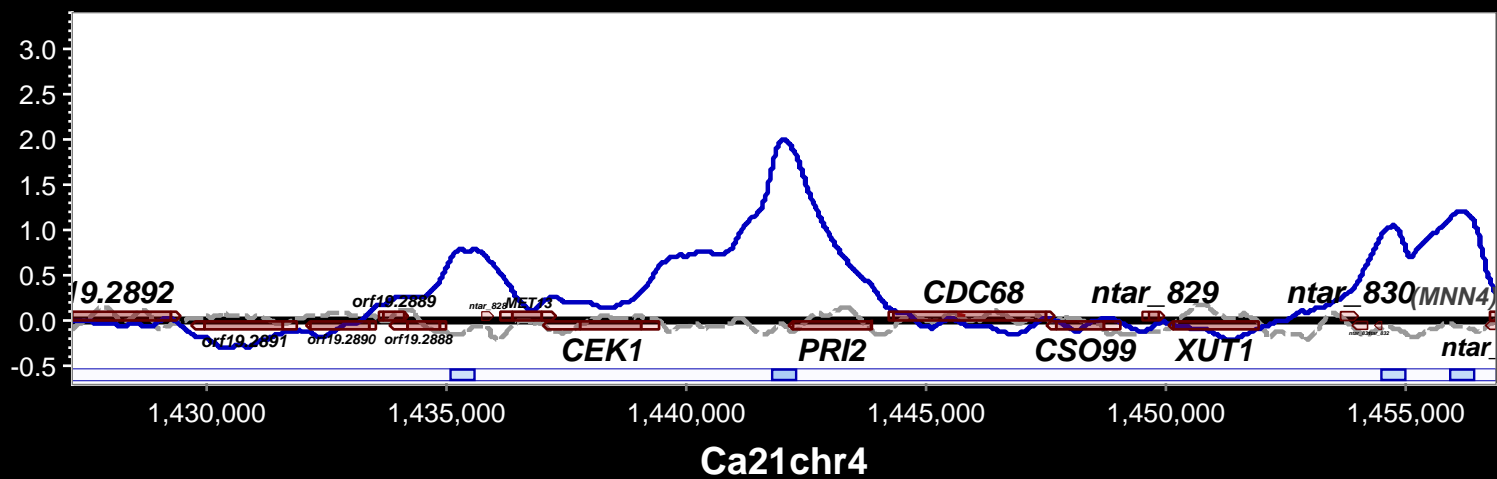

[2.001] Ca21chr4:746655-776338 [+] [HWP1, orf19.1323, orf19.1318, RAD2, ECM38]

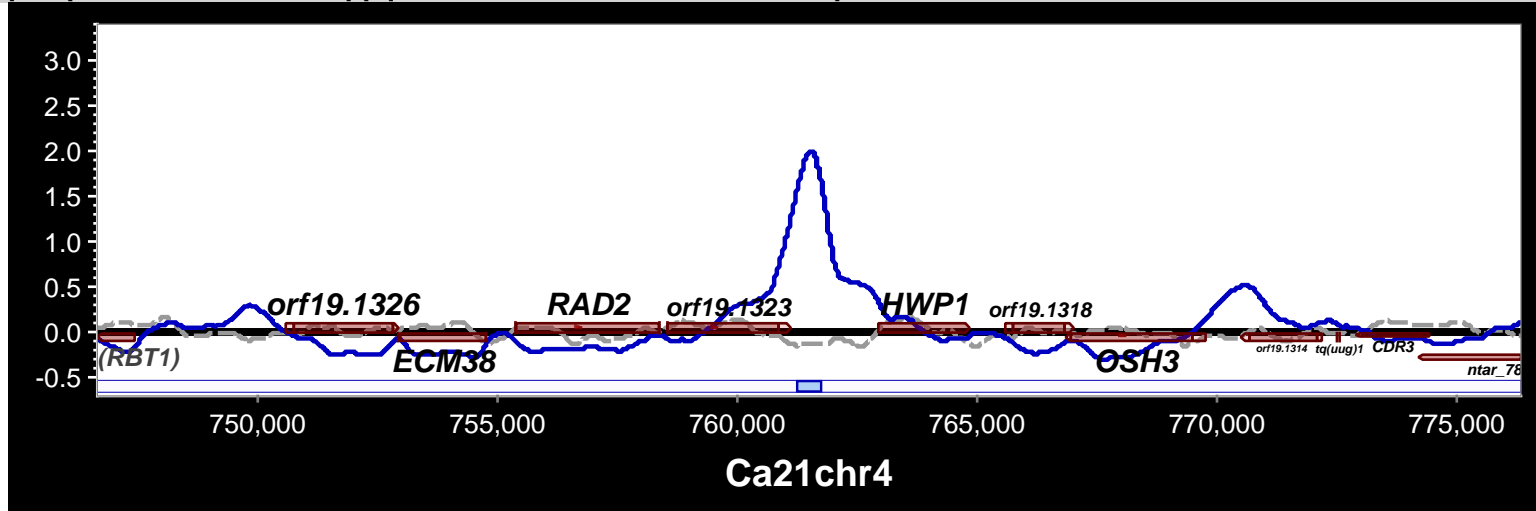

[2.0] Ca21chrR:1823520-1853203 [+] [PGA13, orf19.6419.1, orf19.6418, tL(CAA)4, TSR1]

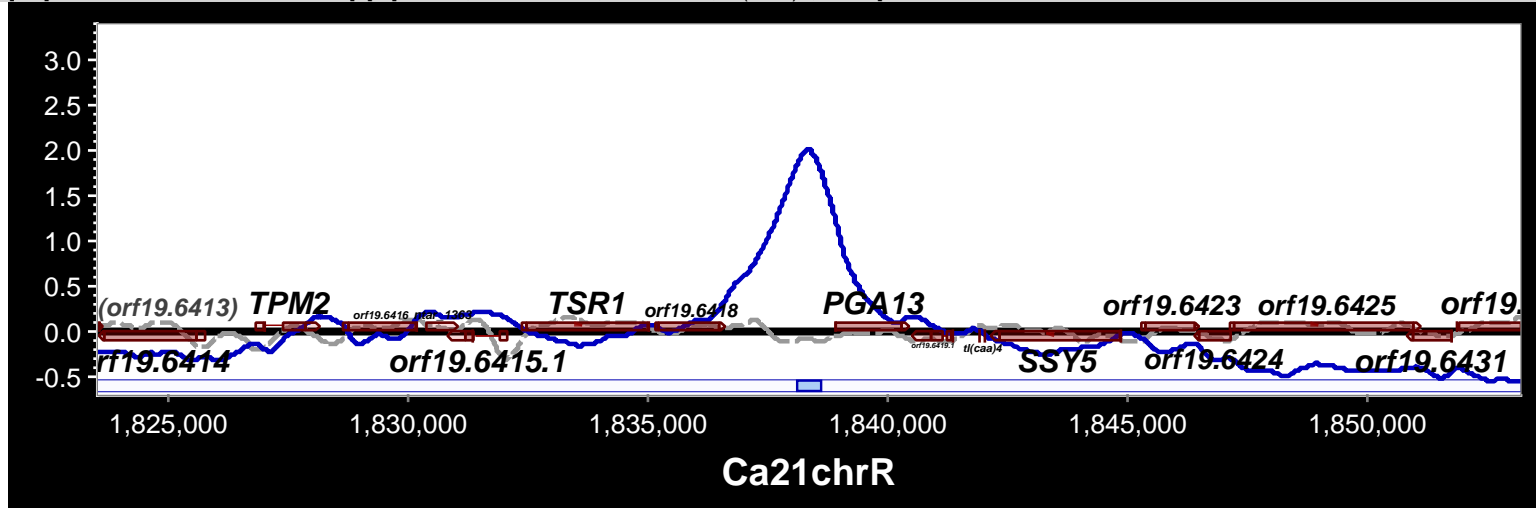

[1.998] Ca21chr2:2165851-2195534 [+] [orf19.5334, SGS1, GCN1, UBC15, GAL4]

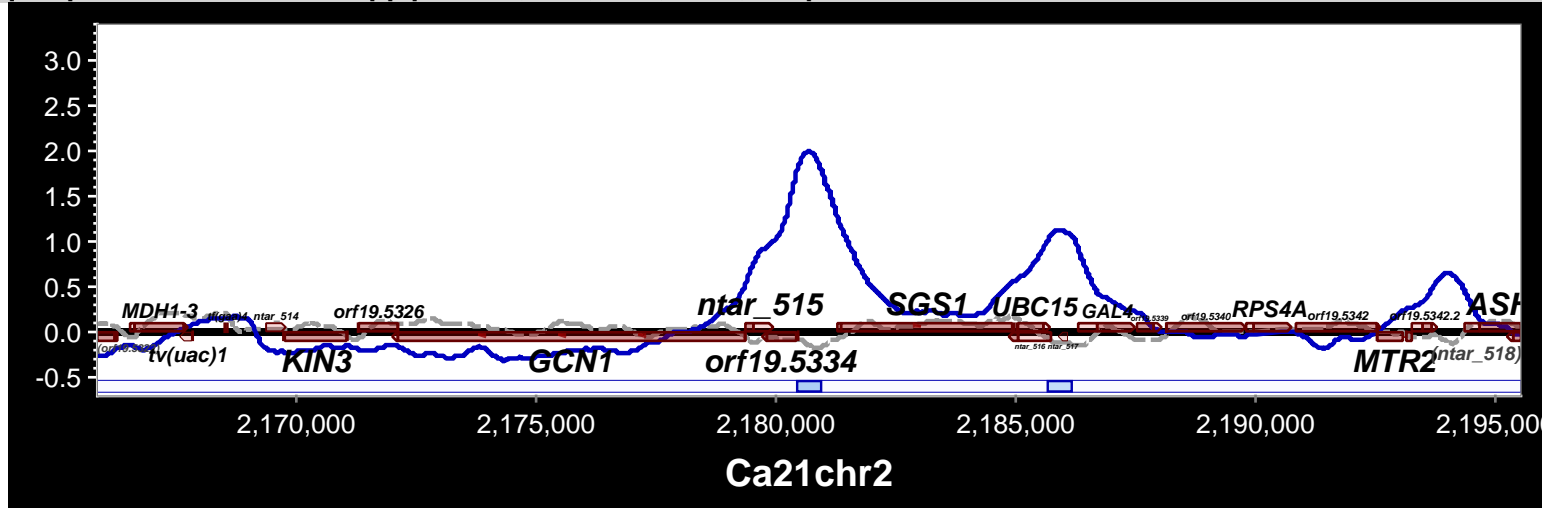

[1.994] Ca21chr1:2855541-2885224 [+] [TYE7, orf19.4942, orf19.4940, PSA2, orf19.4939]

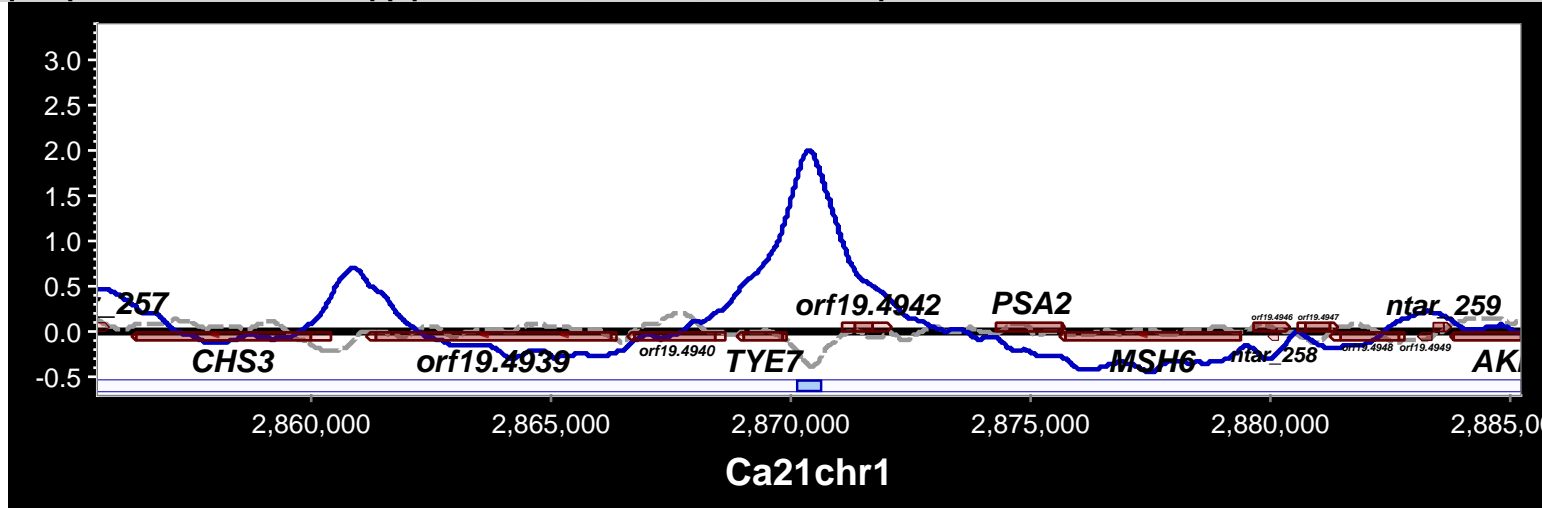

[1.994] Ca21chr7:436551-466234 [+] [CUP9, EXO70, LIG1, GRX1, orf19.6509]

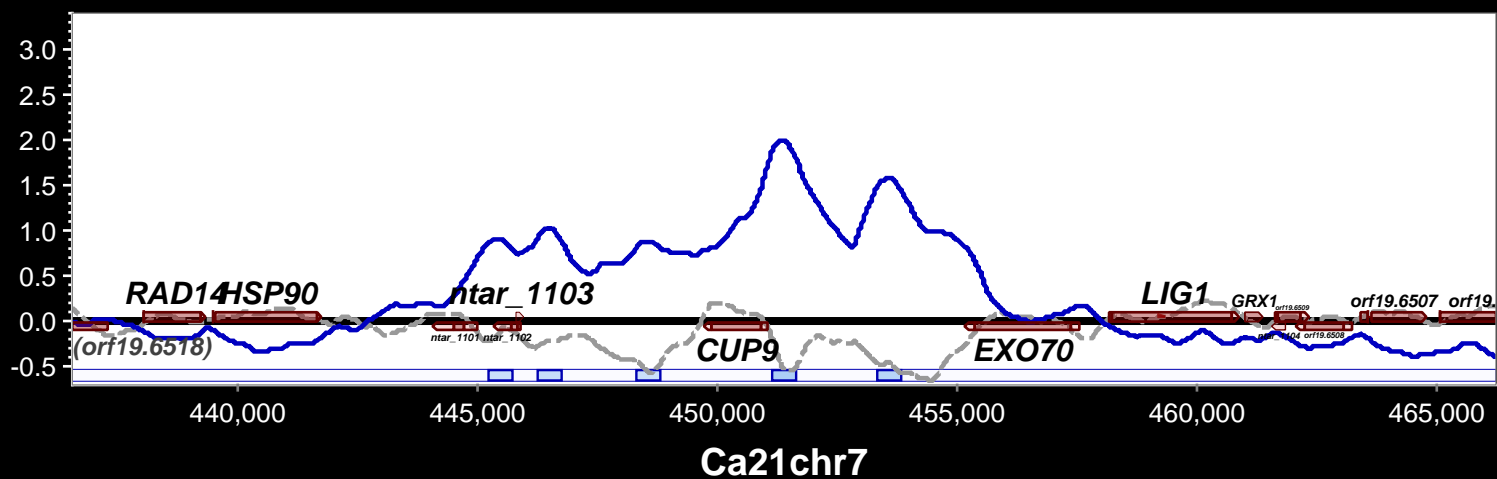

[1.989] Ca21chr5:292598-322281 [+] [CFL5, CFL4, SNM1, SEF2, orf19.1933]

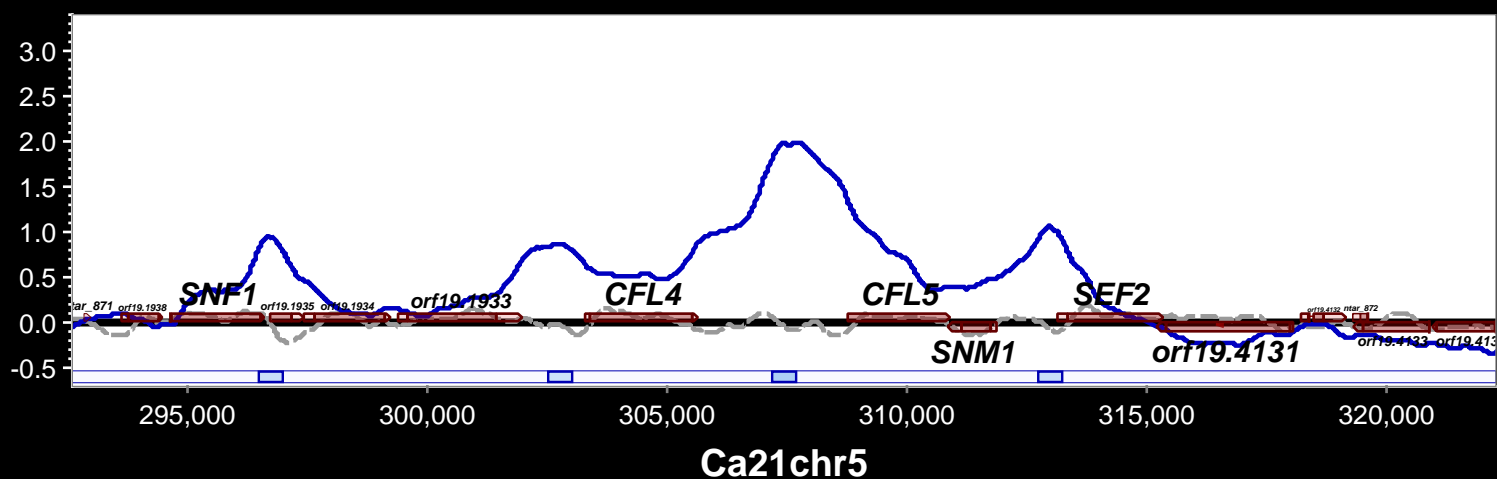

[1.986] Ca21chr7:710648-740331 [+] [LIP8, orf19.1344, RBR3, orf19.5125, orf19.1343]

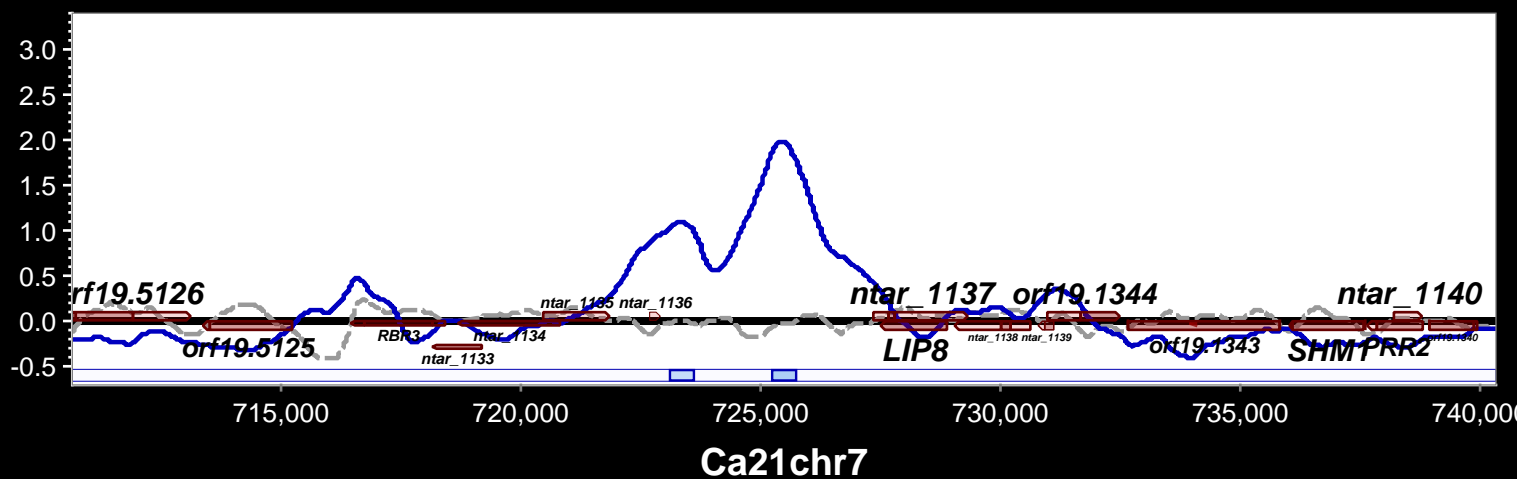

[1.986] Ca21chr7:895287-924970 [+] [orf19.7152, orf19.7153, orf19.7151, UTP18, NRG1]

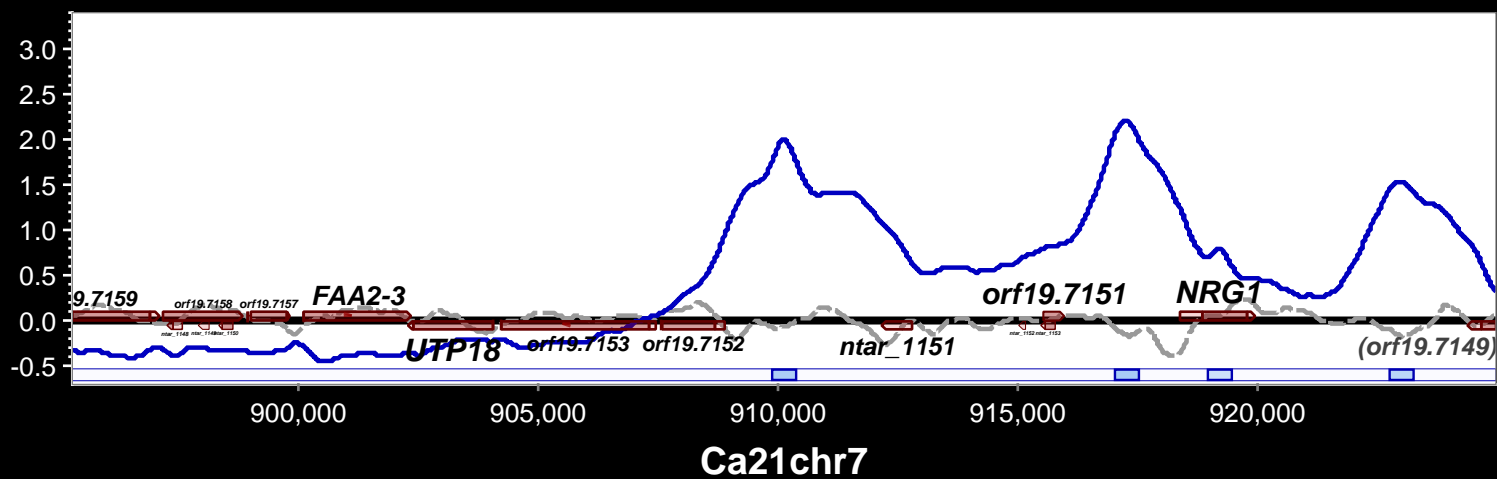

[1.978] Ca21chr6:142794-172477 [+] [SUN41, CAN3, orf19.3643, GPX2, orf19.86]

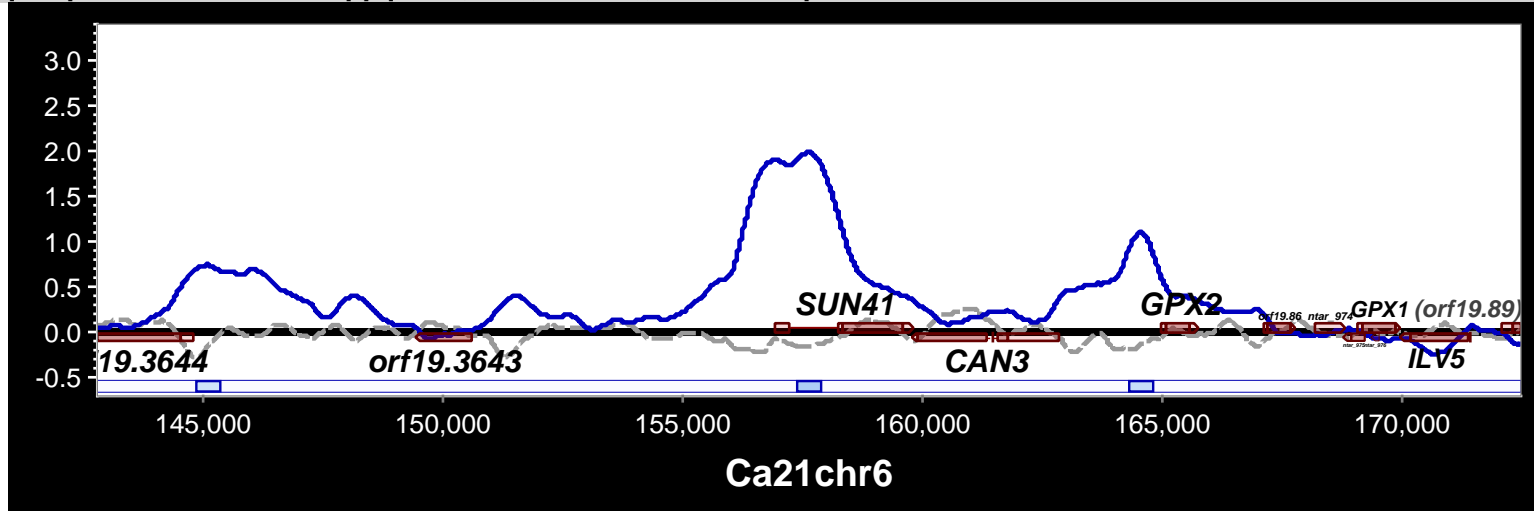

[1.976] Ca21chr5:640073-669756 [+] [orf19.4321, MIG1, DAP2, GRE3, orf19.4323]

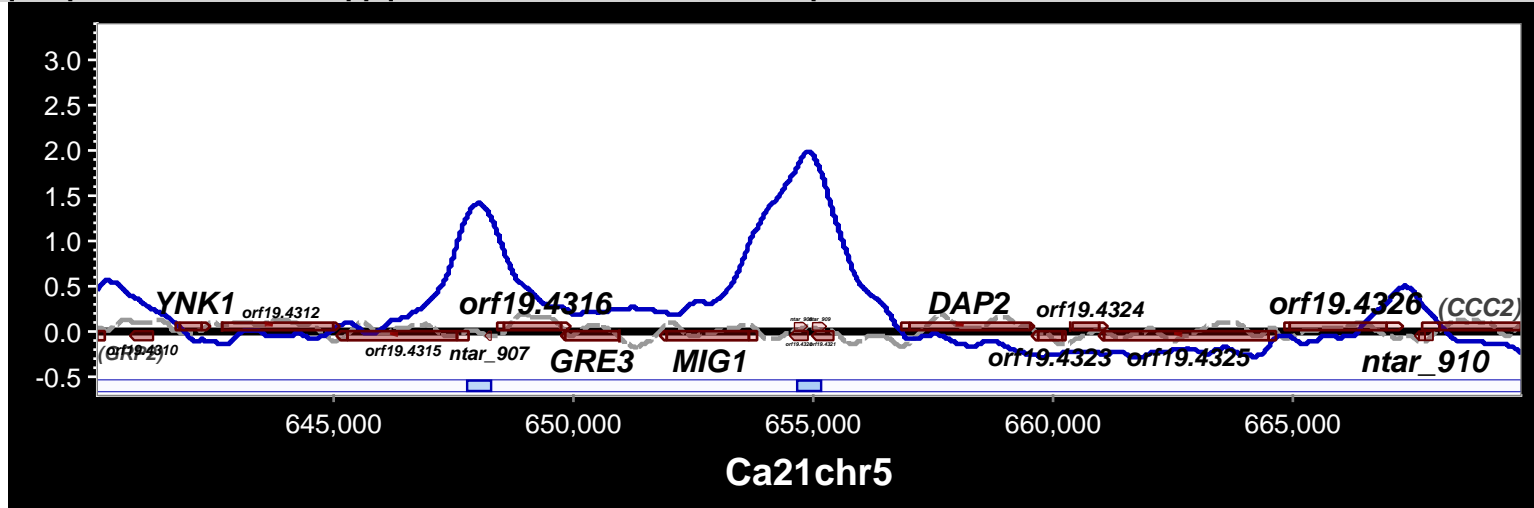

[1.967] Ca21chr1:930991-960674 [+] [orf19.6852.1, orf19.6852, CHL4, orf19.6853, ATP1]

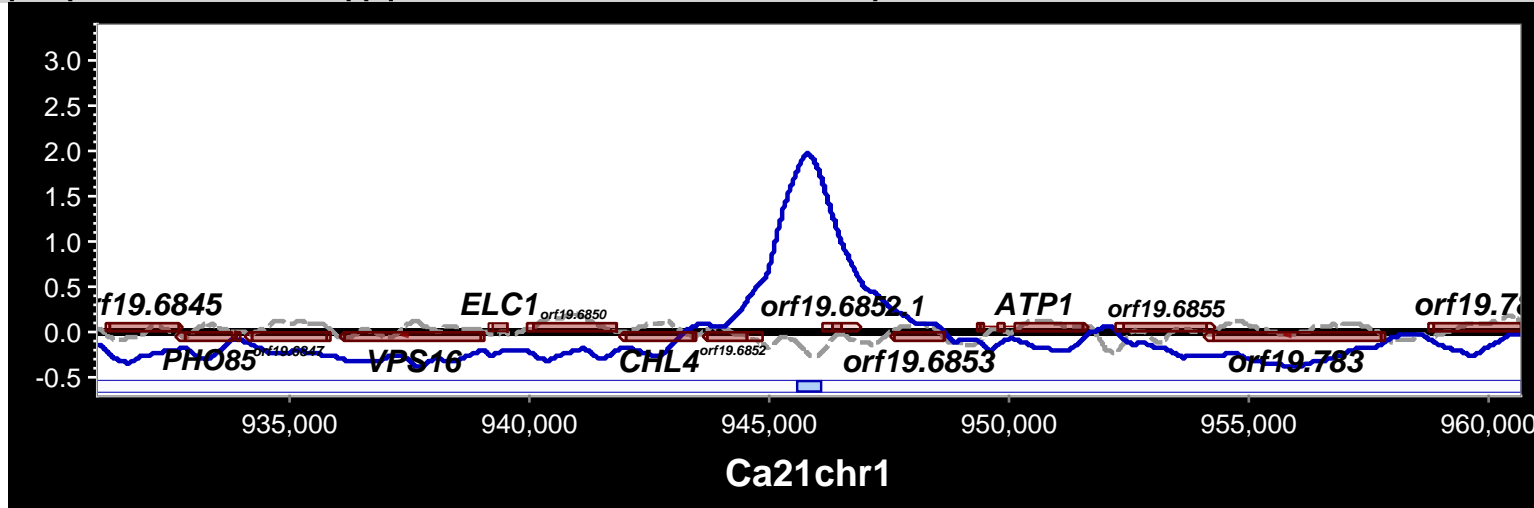

[1.967] Ca21chr1:1484736-1514419 [+] [RBT4, orf19.6203, orf19.6200, orf19.6205, orf19.6199]

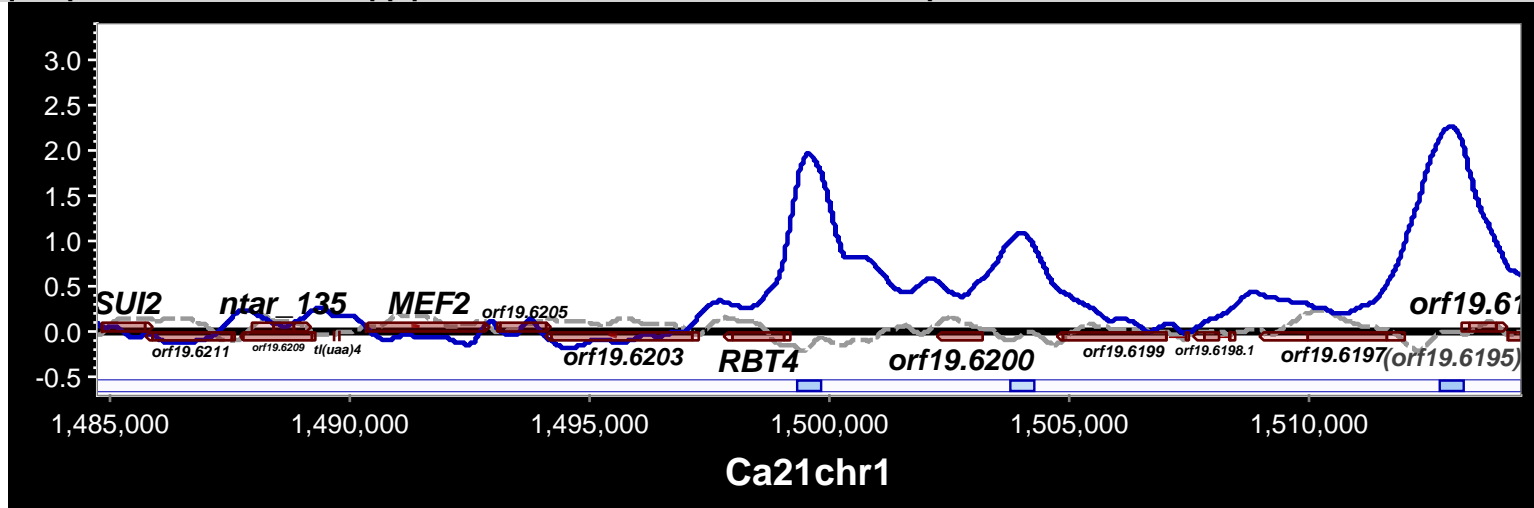

[1.965] Ca21chr1:2333473-2363156 [+] [orf19.1831, FCY23, orf19.1830, orf19.1833, orf19.1005]

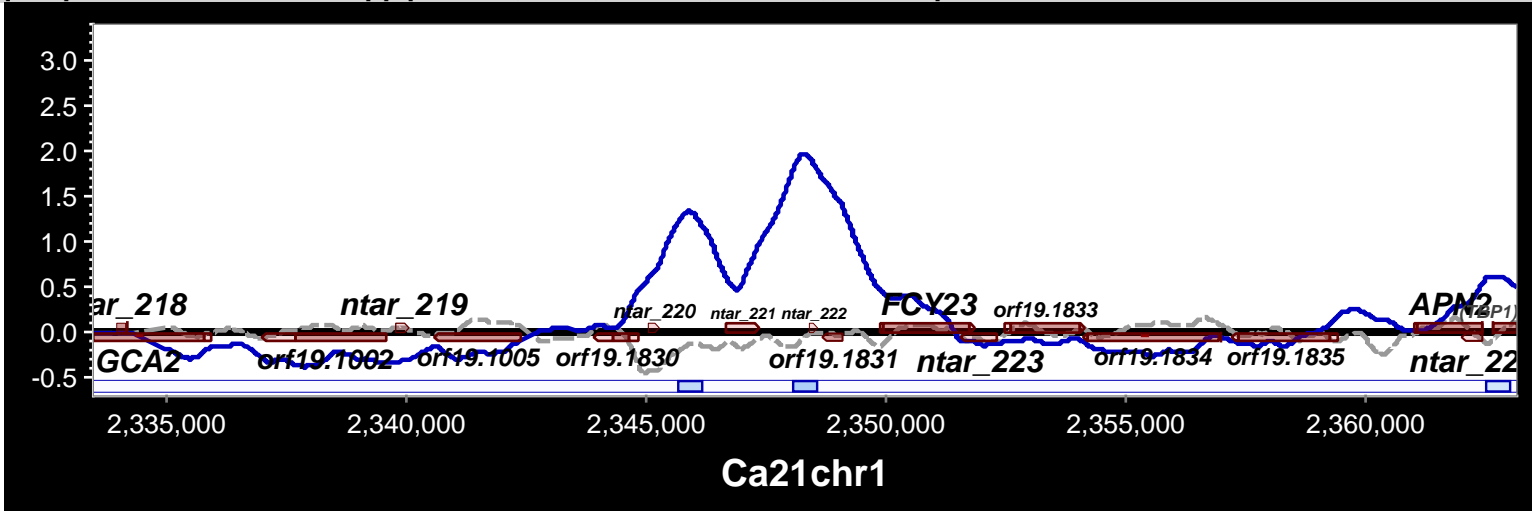

[1.965] Ca21chr3:1714416-1744099 [+] [TCC1, orf19.6732, orf19.6731.1, orf19.6731, orf19.6730]

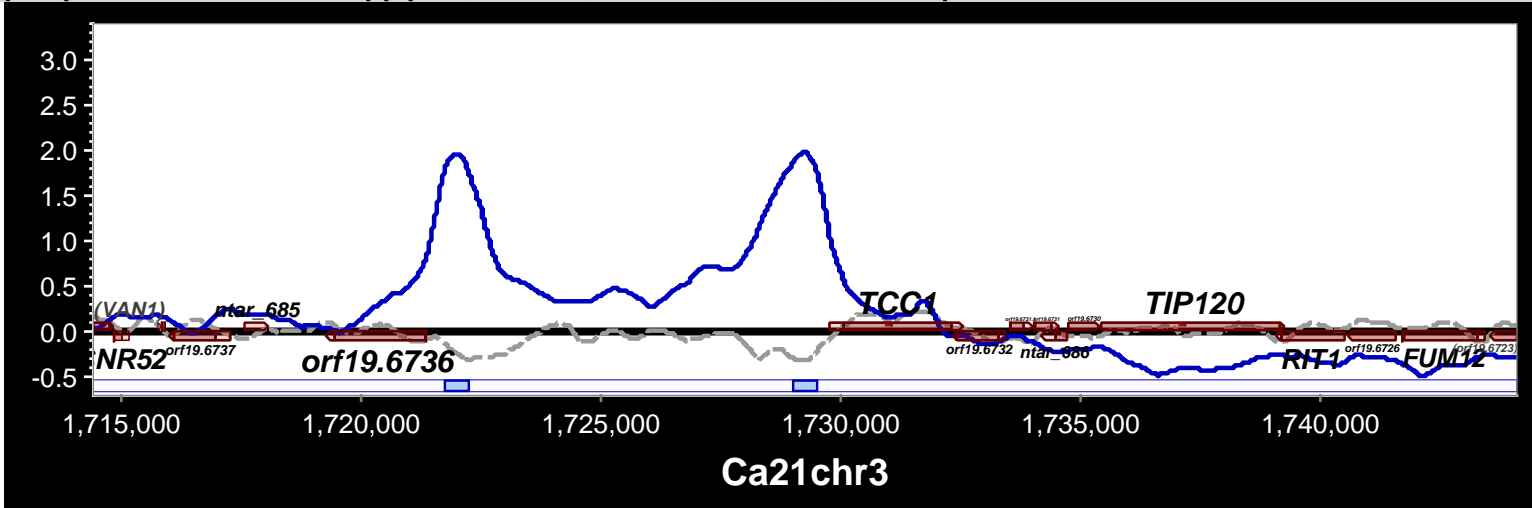

[1.963] Ca21chr3:1707154-1736837 [+] [orf19.6736, orf19.6737, tF(GAA)5, tR(UCU)5, SNR52]

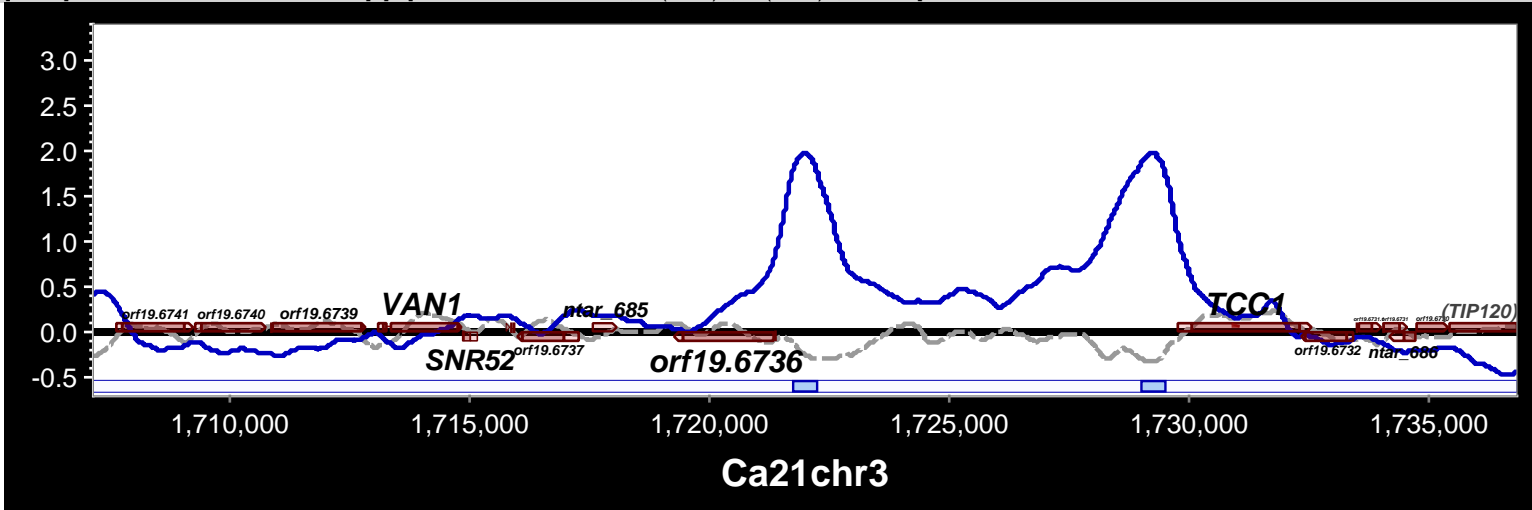

[1.959] Ca21chr1:2260213-2289896 [+] [orf19.4900, GCA1, orf19.4901, orf19.4898, orf19.4897]

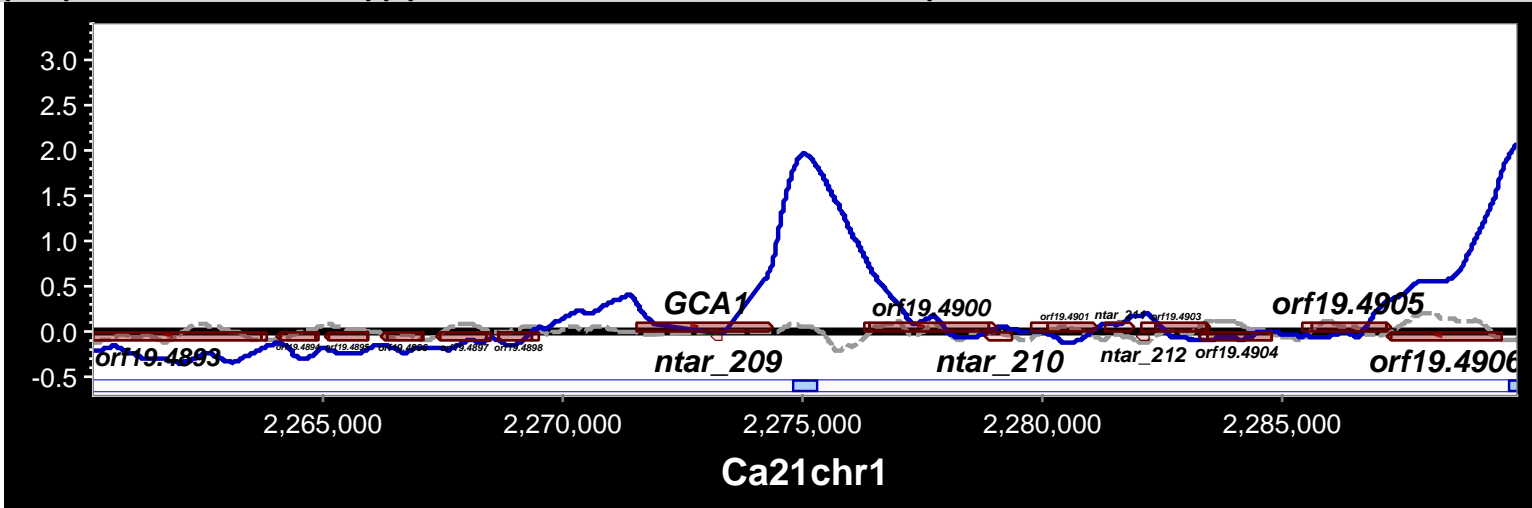

[1.959] Ca21chr5:265062-294745 [+] [GPR1, AUR1, orf19.1943, orf19.1946, orf19.1948]

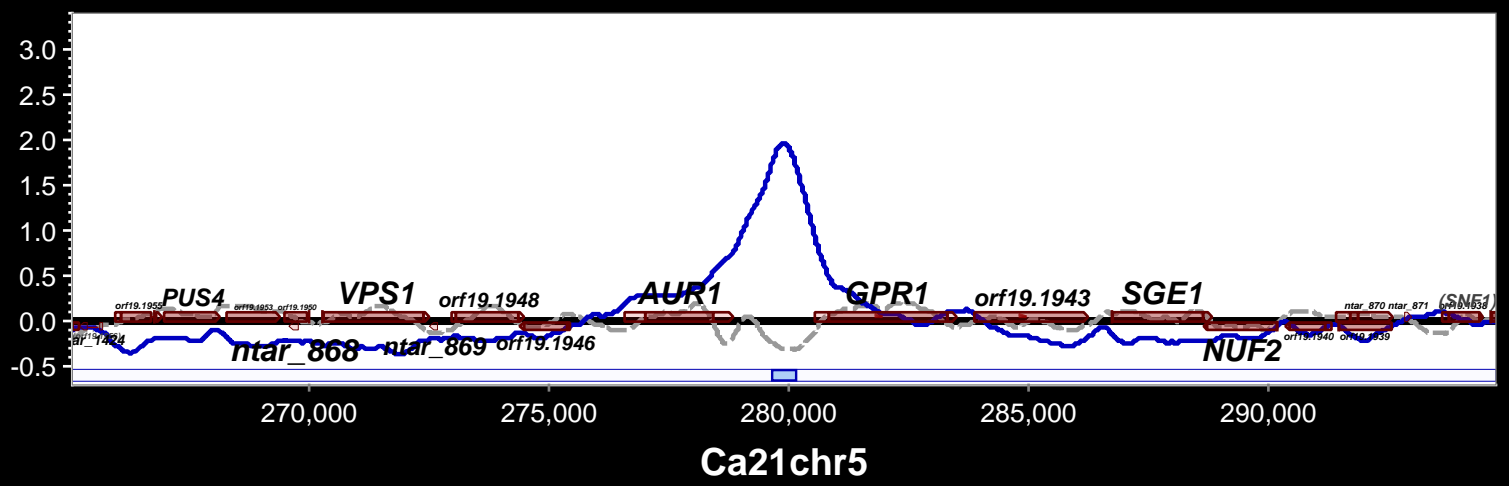

[1.955] Ca21chr4:1455570-1485253 [+] [PDC11, CBF1, orf19.2875, TOP2, PGA15]

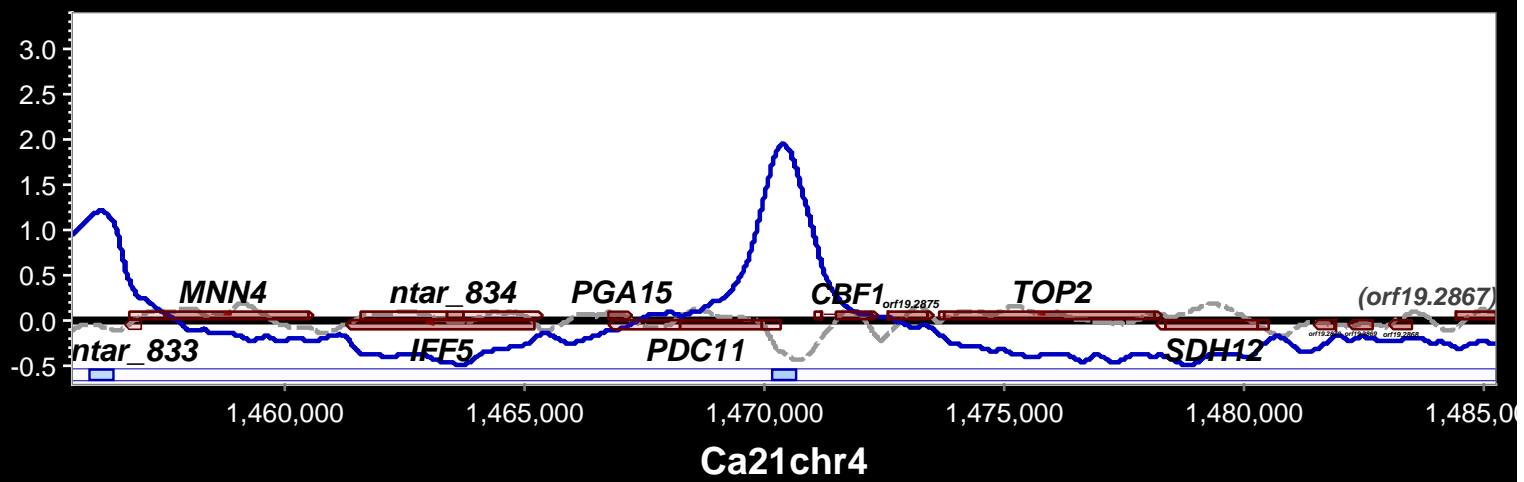

[1.945] Ca21chr6:21848-51531 [+] [orf19.1189, CPH2, orf19.1186, orf19.1185, orf19.1183]

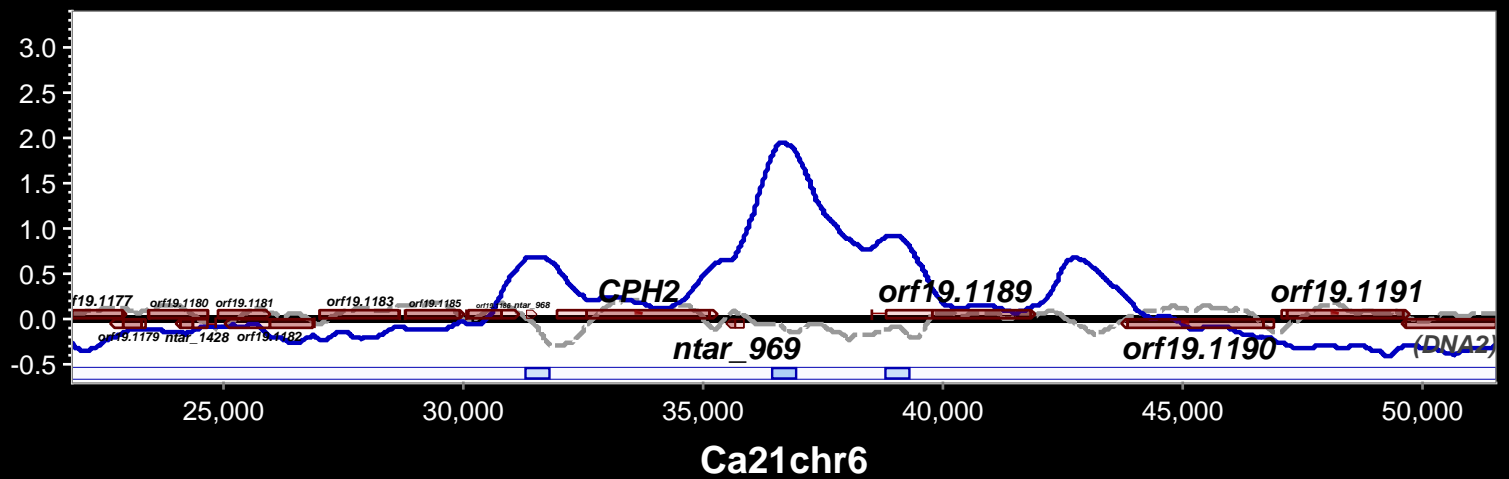

[1.941] Ca21chrR:1511264-1540947 [+] [CRZ2, URA2, ALS3, orf19.1815, SPT10]

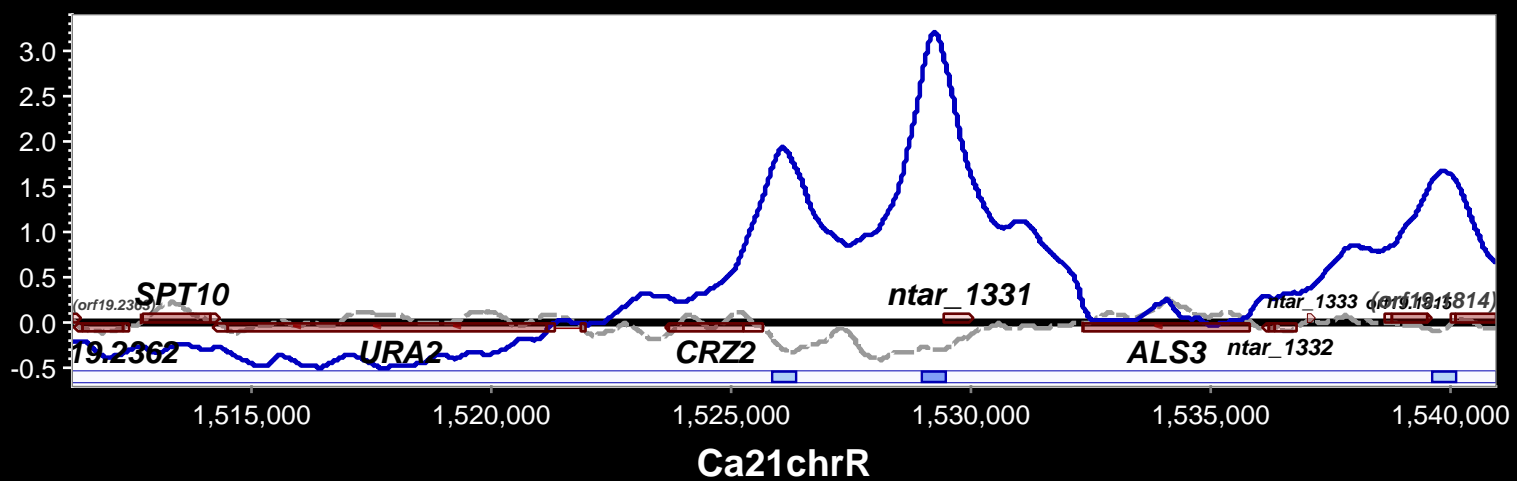

[1.934] Ca21chr4:1410694-1440377 [+] [orf19.2892, orf19.2893, VMA8, orf19.2891, SOU1]

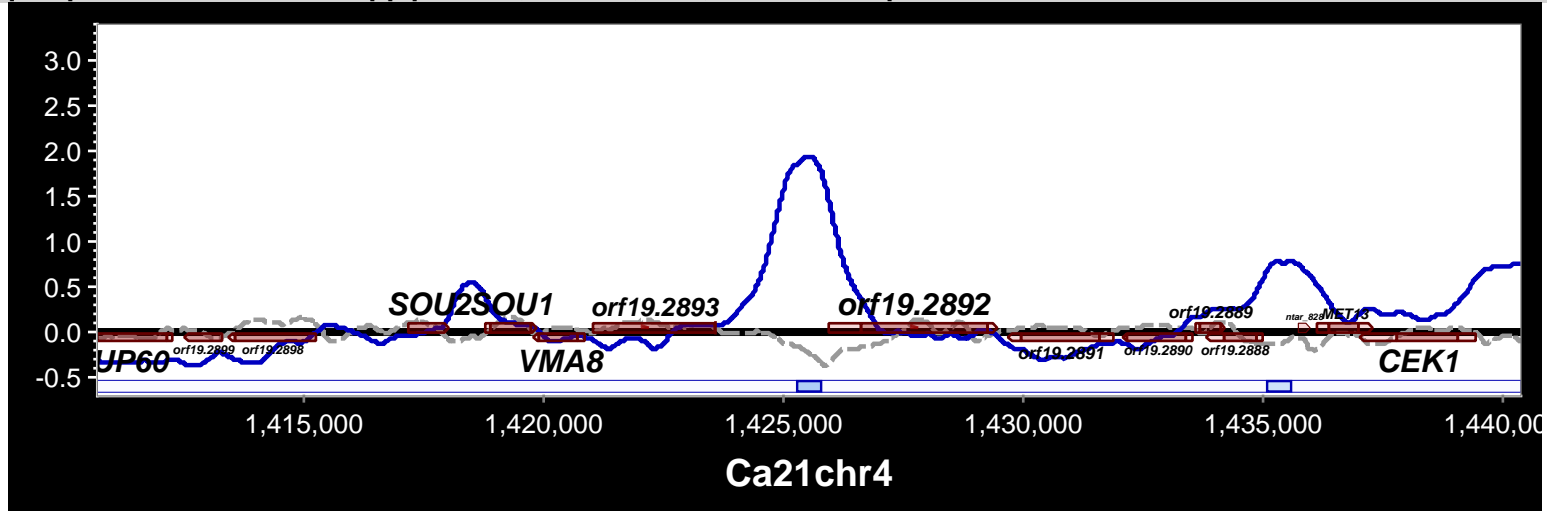

[1.928] Ca21chr7:166482-196165 [+] [orf19.7027, orf19.7029, MCM1, orf19.7024, SSR1]

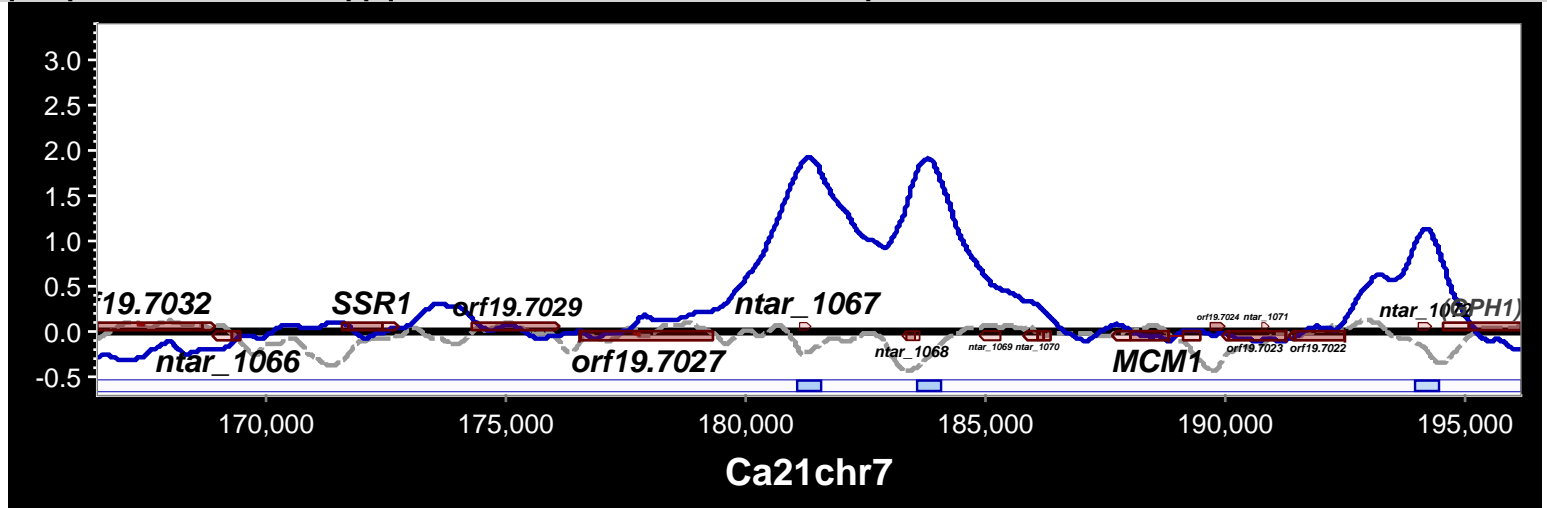

[1.921] Ca21chr1:1929003-1958686 [+] [MSN4, orf19.4751.1, PFK26, orf19.4751, orf19.4750]

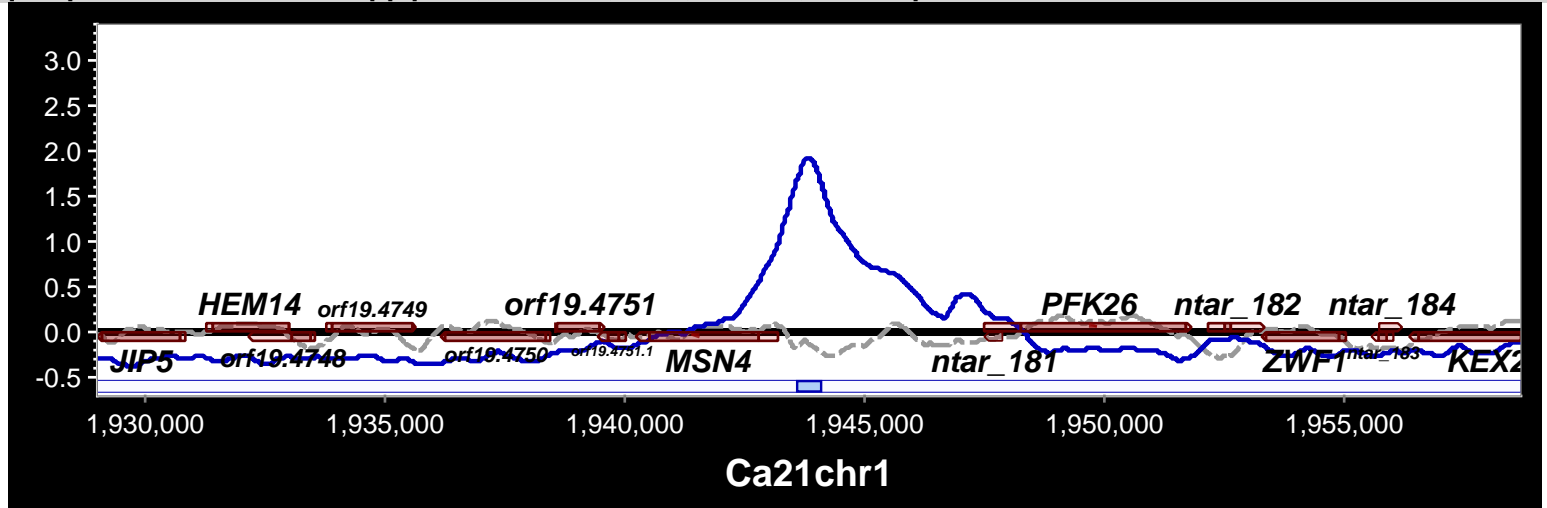

[1.913] Ca21chr4:222284-251967 [+] [BMT9, orf19.4672, CRD2, CAS5, orf19.4675]

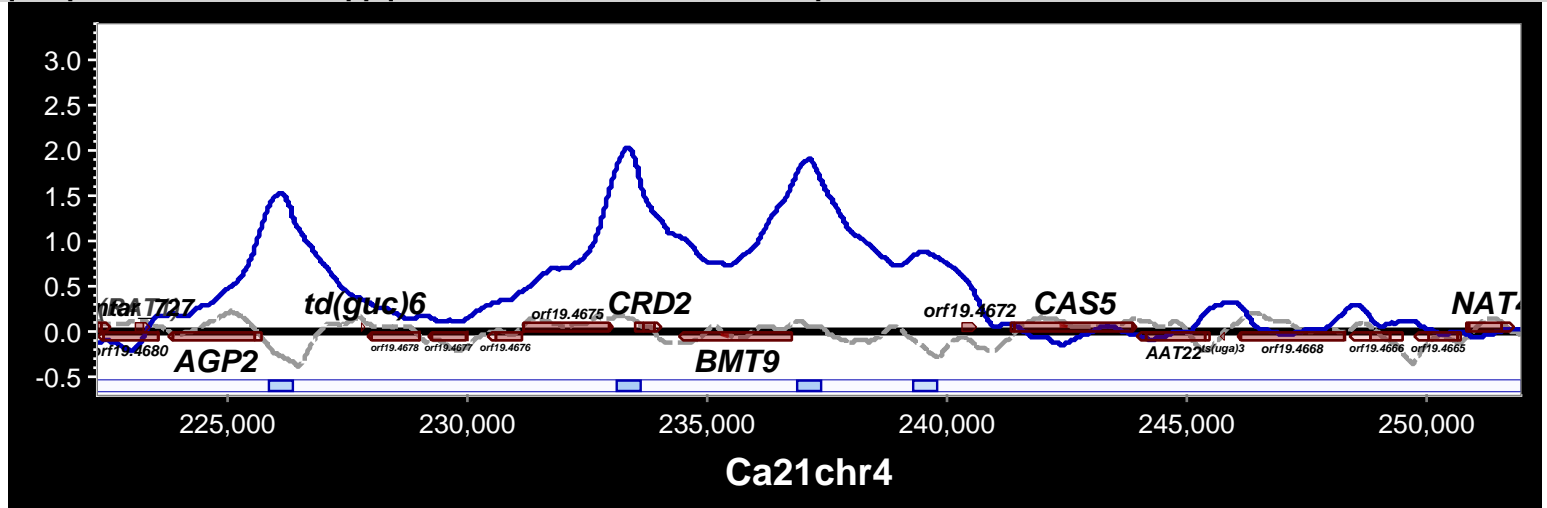



[1.912] Ca21chr1:997698-1027381 [+] [SAP7, MRPL37, YBN5, orf19.757, orf19.757.1]

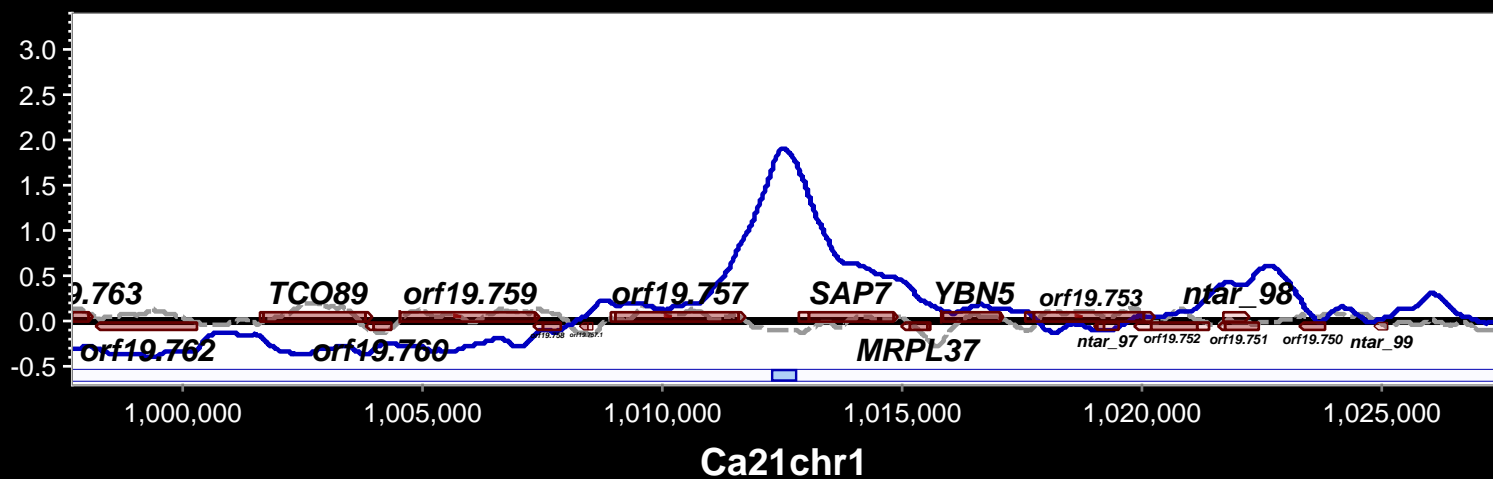

[1.912] Ca21chr7:168983-198666 [+] [orf19.7027, MCM1, orf19.7024, orf19.7023, orf19.7022]

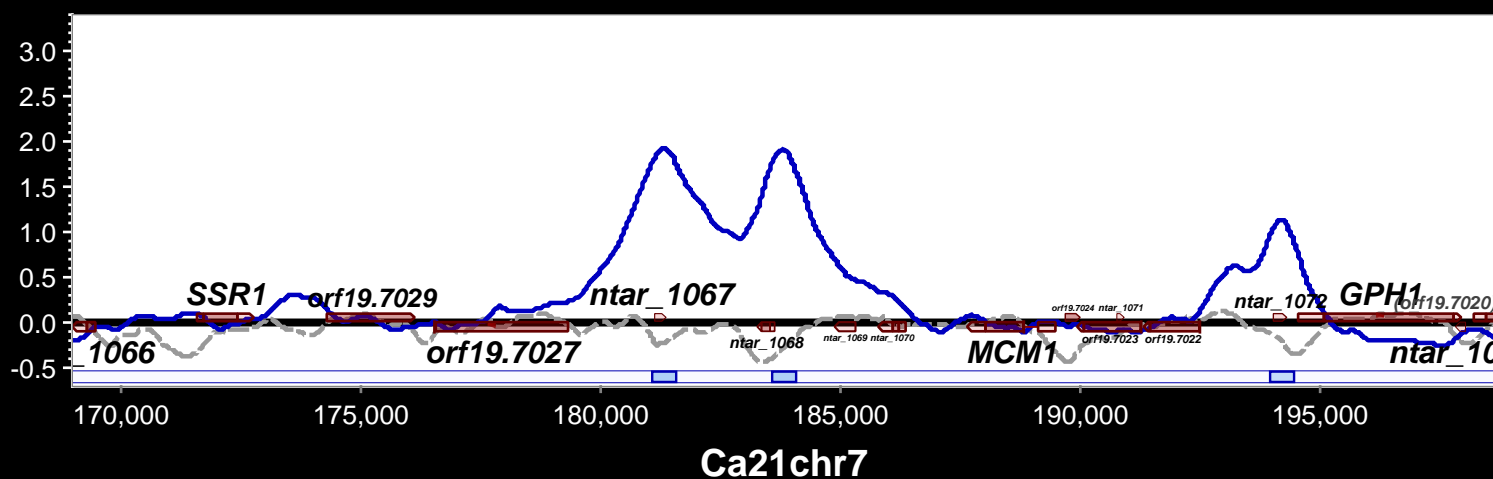

[1.91] Ca21chrR:510097-539780 [+] [IDP2, GEF2, ERG25, orf19.3730, orf19.3728]

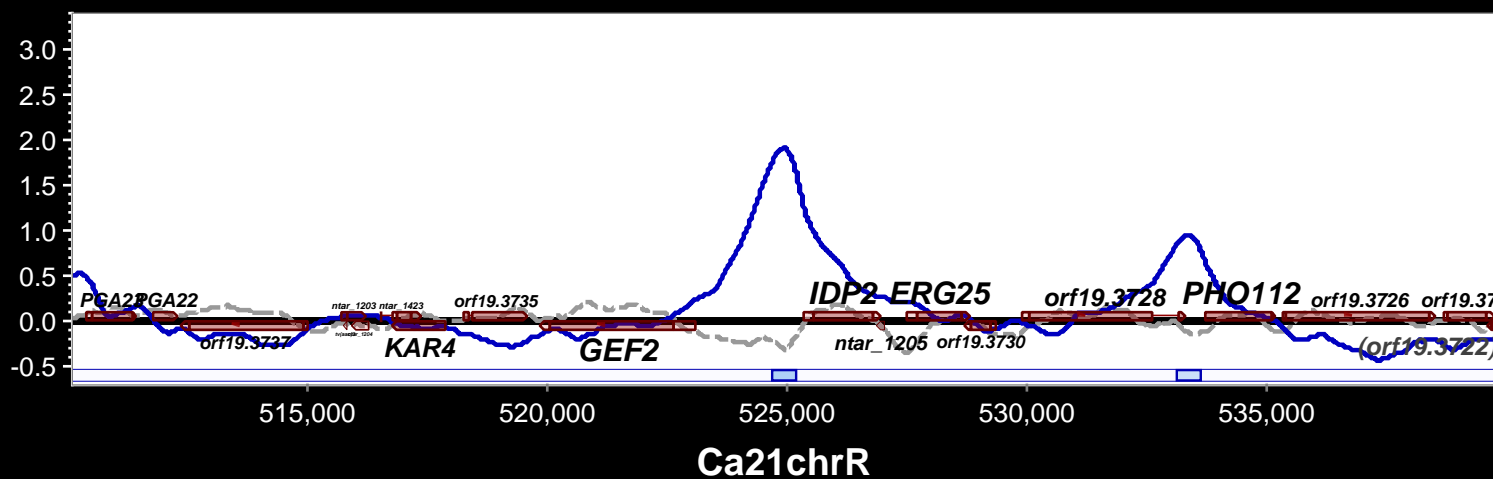

[1.907] Ca21chrR:1875317-1905000 [+] [RDN5, RDN18, RDN58, RDN25, TAR1]

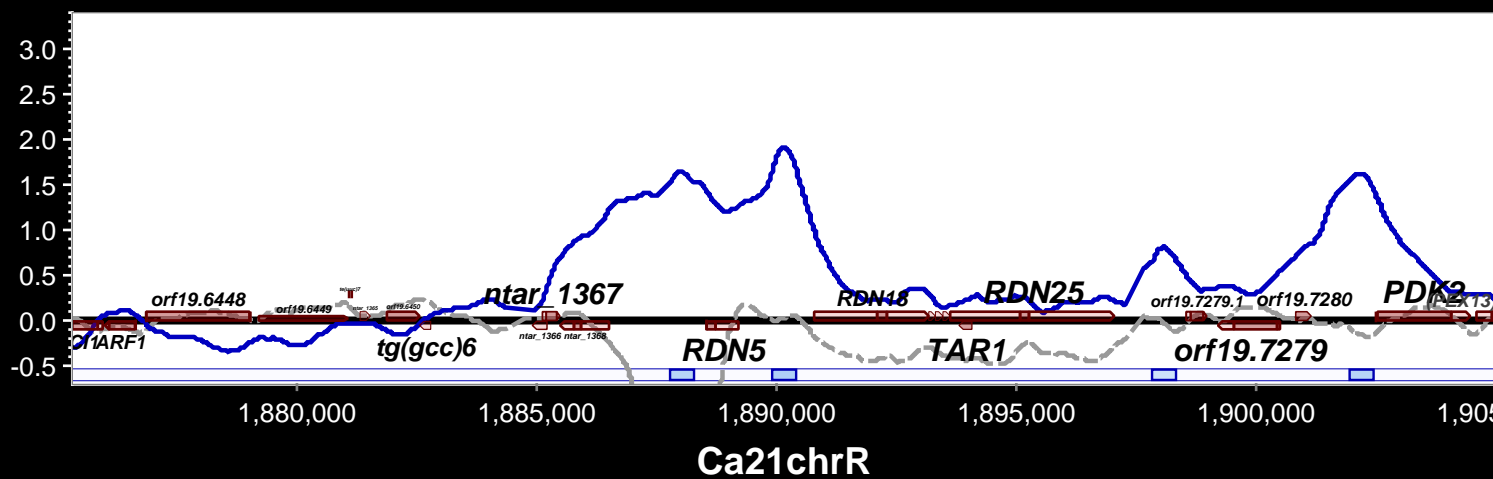

[1.903] Ca21chr6:41863-71546 [+] [GNP1, DNA2, orf19.1195, orf19.1196, orf19.1198]

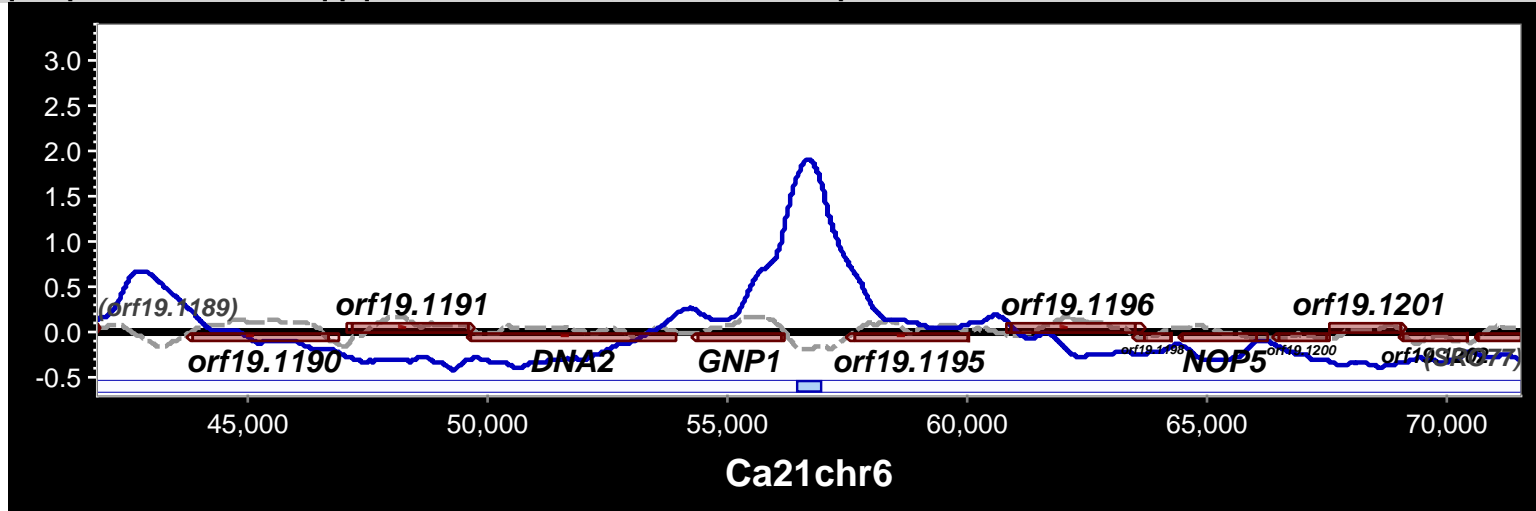

[1.901] Ca21chr6:256244-285927 [+] [orf19.3448, orf19.3449, orf19.3447, orf19.3449.2, orf19.3450.1]

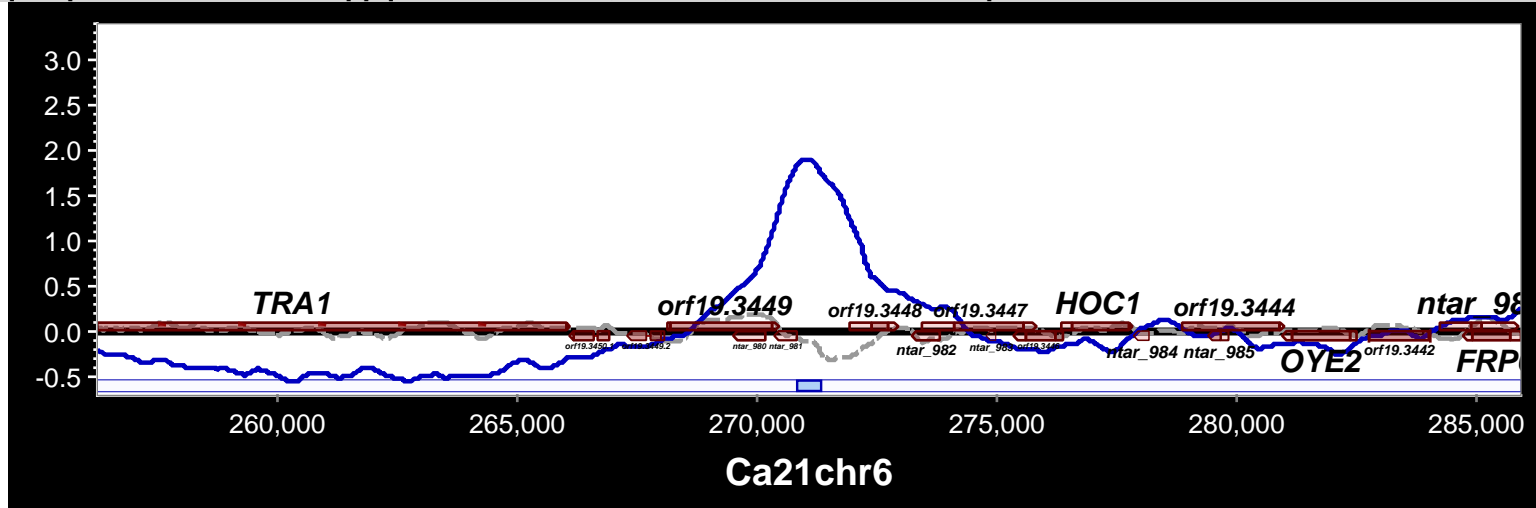

[1.899] Ca21chrR:635325-665008 [+] [GZF3, RHO1, orf19.2844, PGM2, orf19.2846]

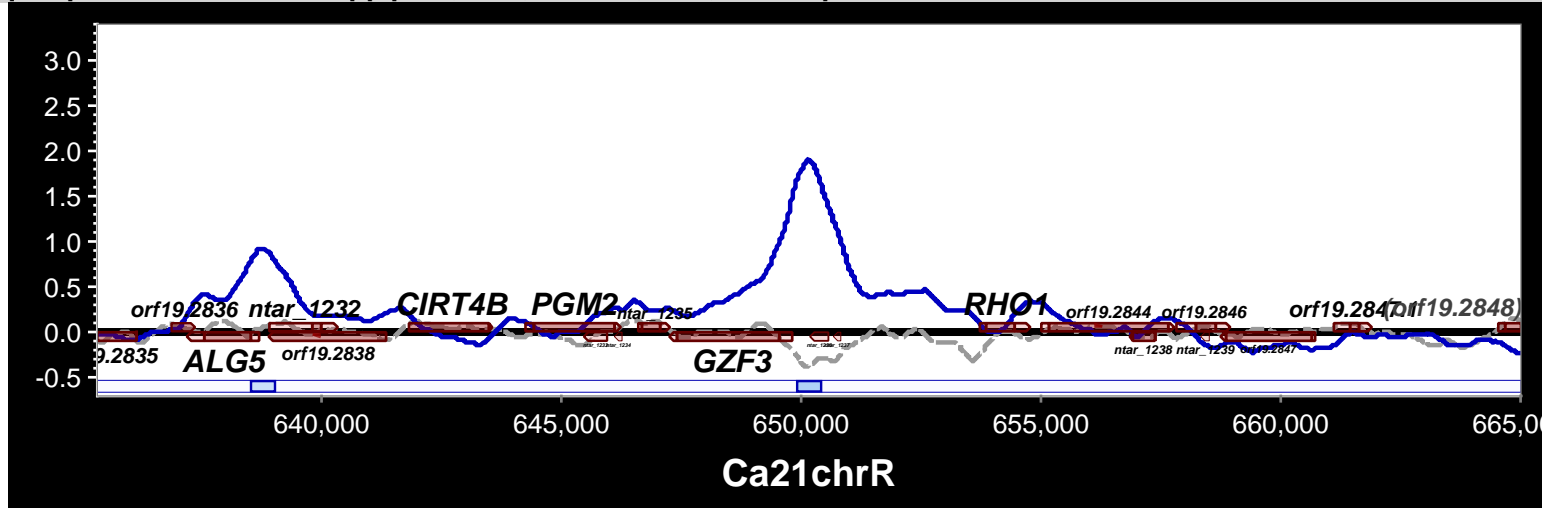

[1.892] Ca21chr1:2016169-2045852 [+] [CRP1, orf19.4783, GRP1, PTC1, orf19.4780]

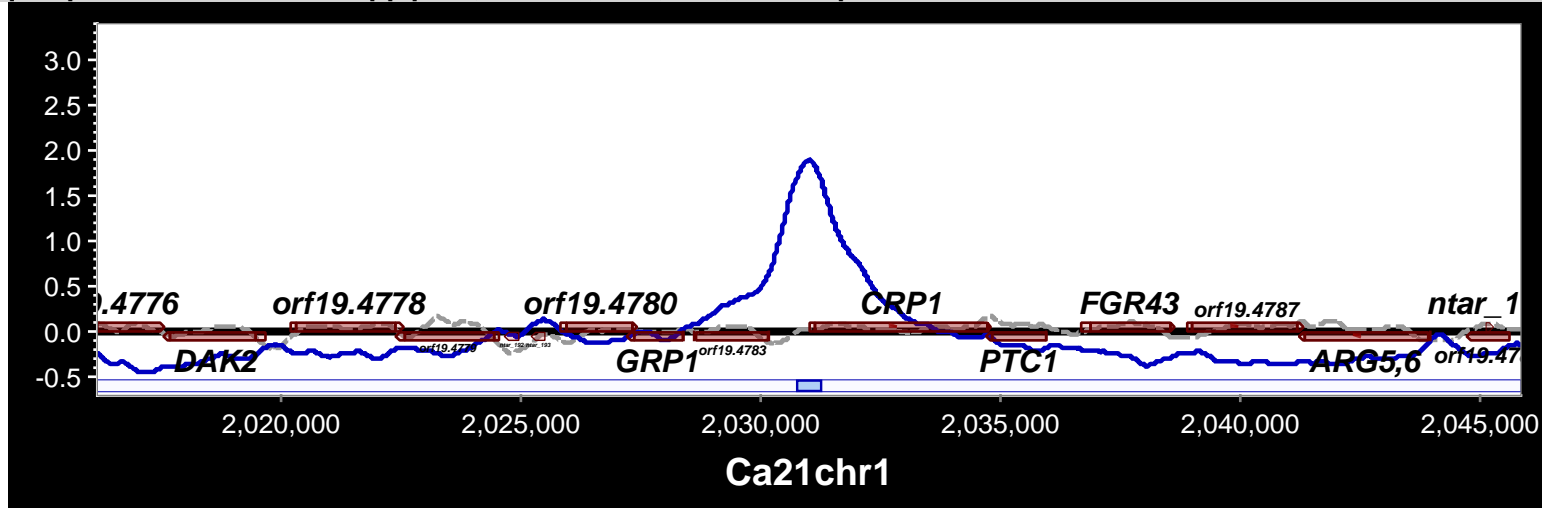

[1.888] Ca21chr7:285068-314751 [+] [orf19.6585, orf19.6586, PRT1, orf19.6587, orf19.6588]

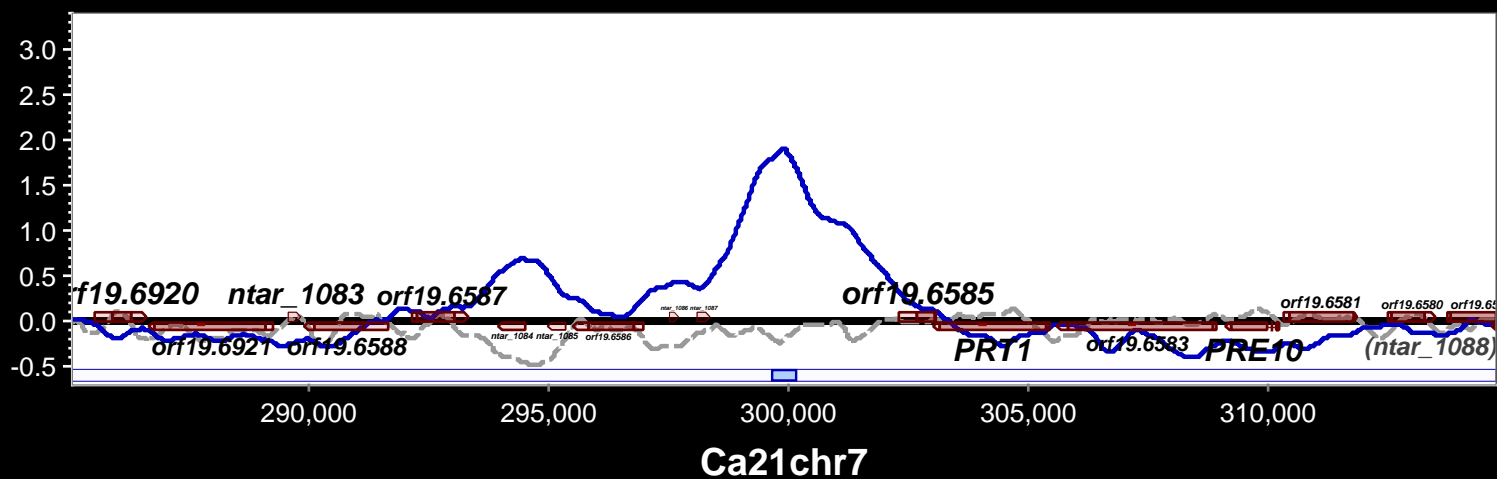

[1.884] Ca21chr1:127291-156974 [+] [HGC1, ROT1, orf19.6030, orf19.6031, orf19.6027]

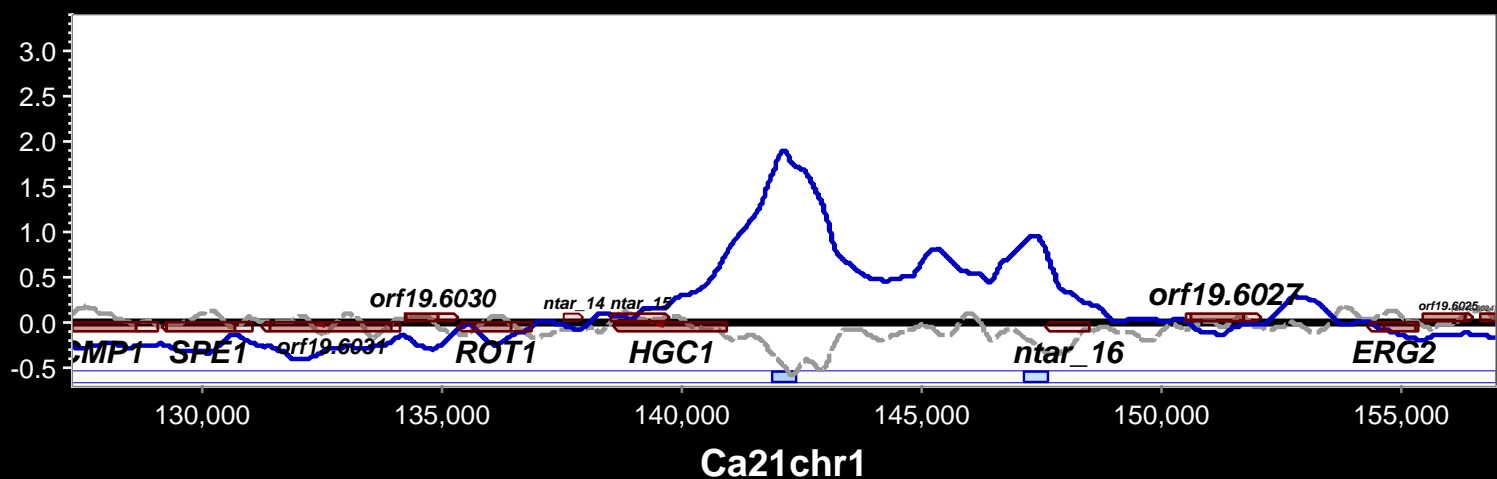

[1.884] Ca21chr3:1239347-1269030 [+] [orf19.6996, orf19.6995, BAT22, orf19.6997, GTT1]

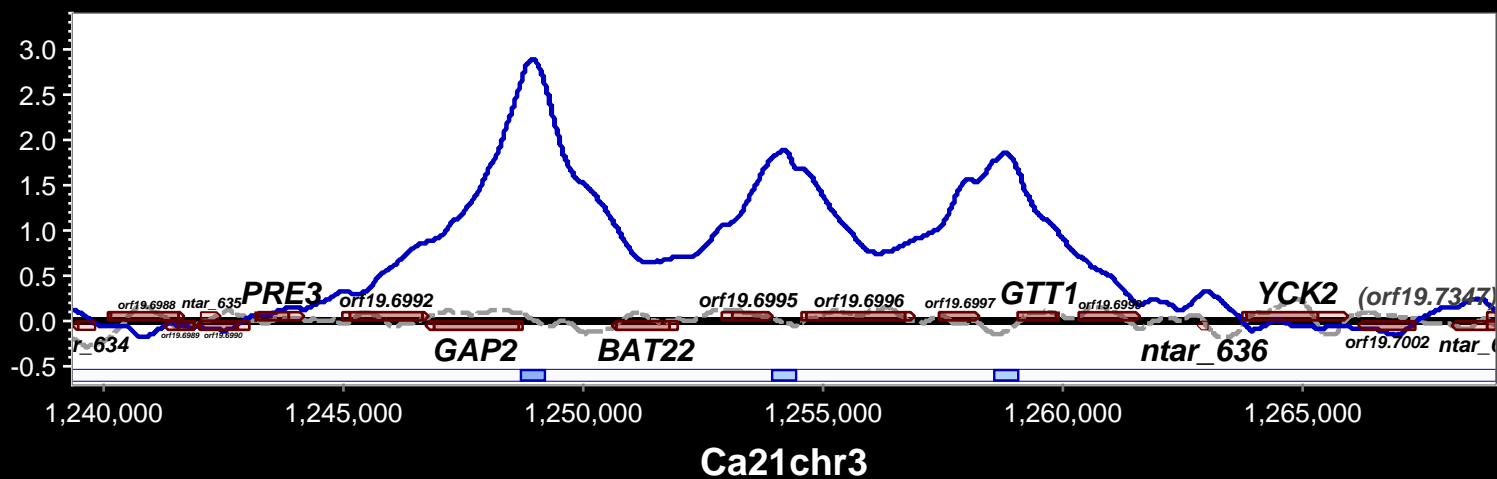

[1.873] Ca21chr5:1033098-1062781 [+] [orf19.3968, orf19.3969, PFK1, CRH12, orf19.3965]

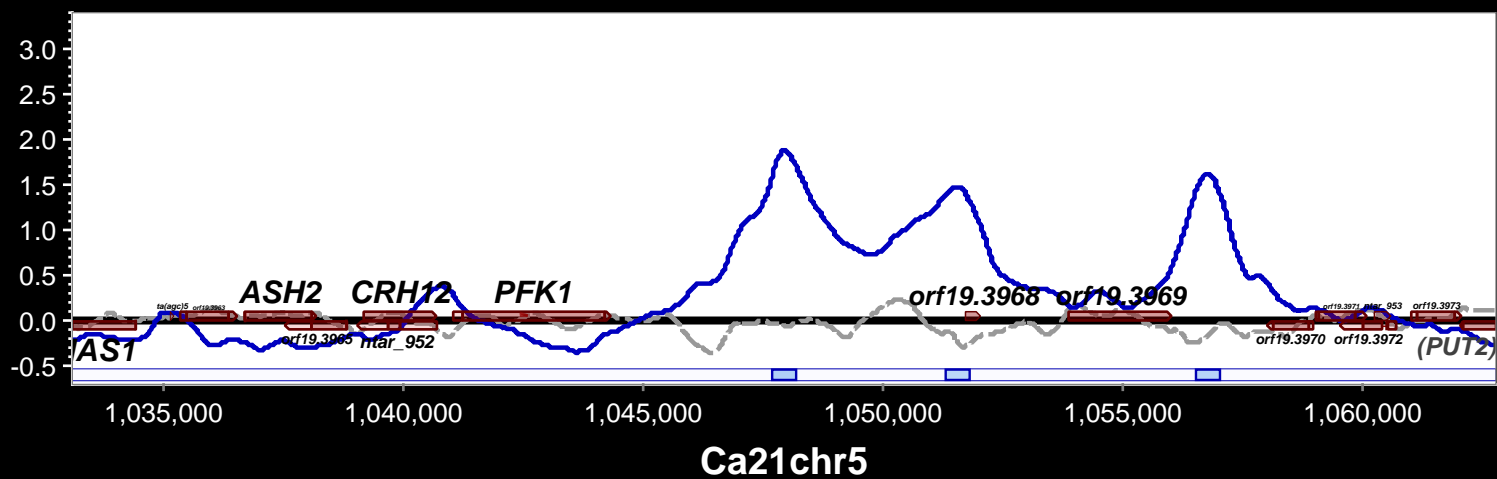

[1.872] Ca21chr6:532125-561808 [+] [orf19.5537, orf19.5536, orf19.5539, orf19.5535, orf19.5534]

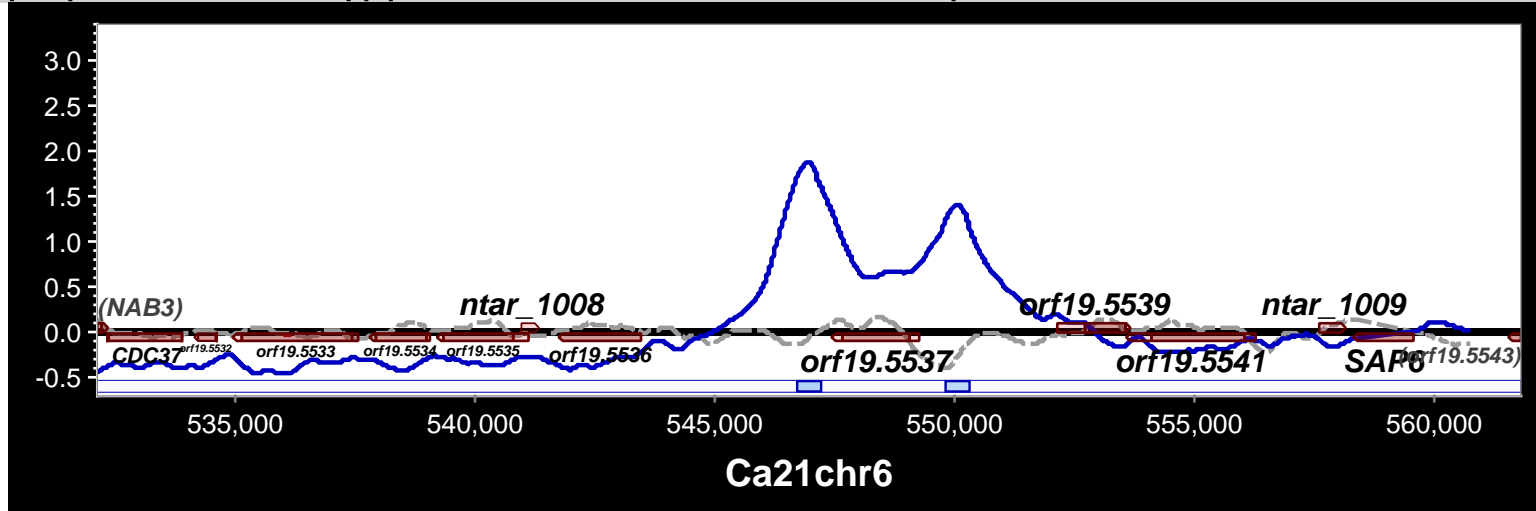

[1.871] Ca21chr6:896770-926453 [+] [orf19.77.1, orf19.4553, SPB1, ALS4, SEC5]

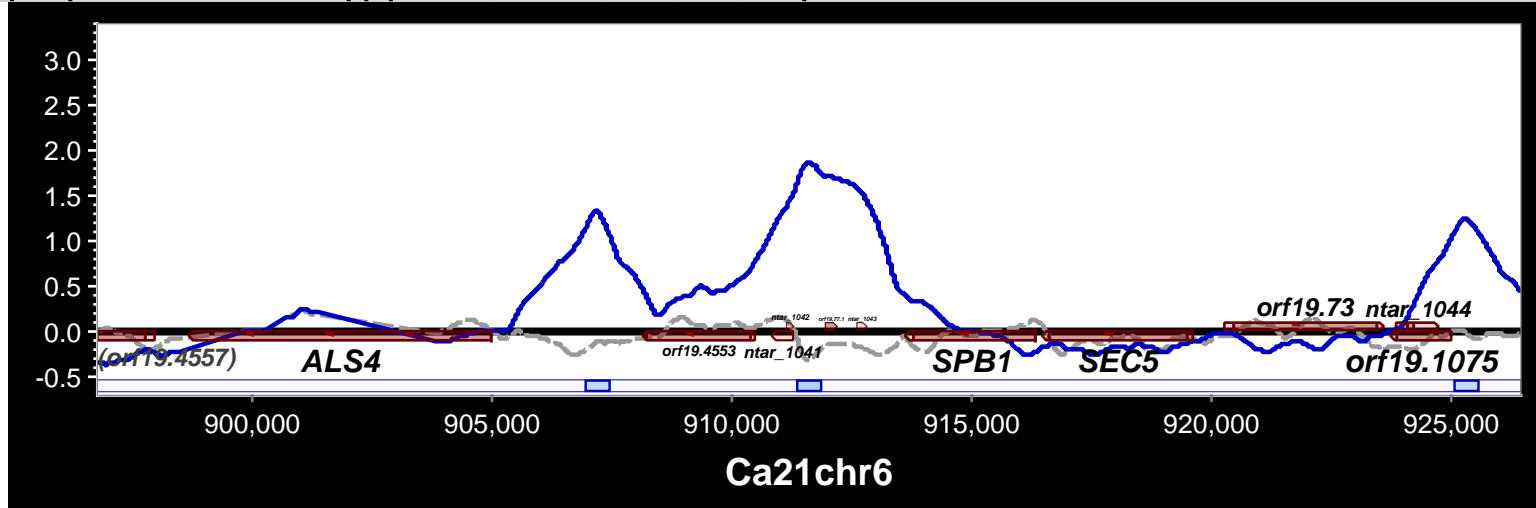

[1.863] Ca21chr3:1208163-1237846 [+] [orf19.6984, orf19.6983, TEA1, tV(AAC)5, tV(AAC)6]

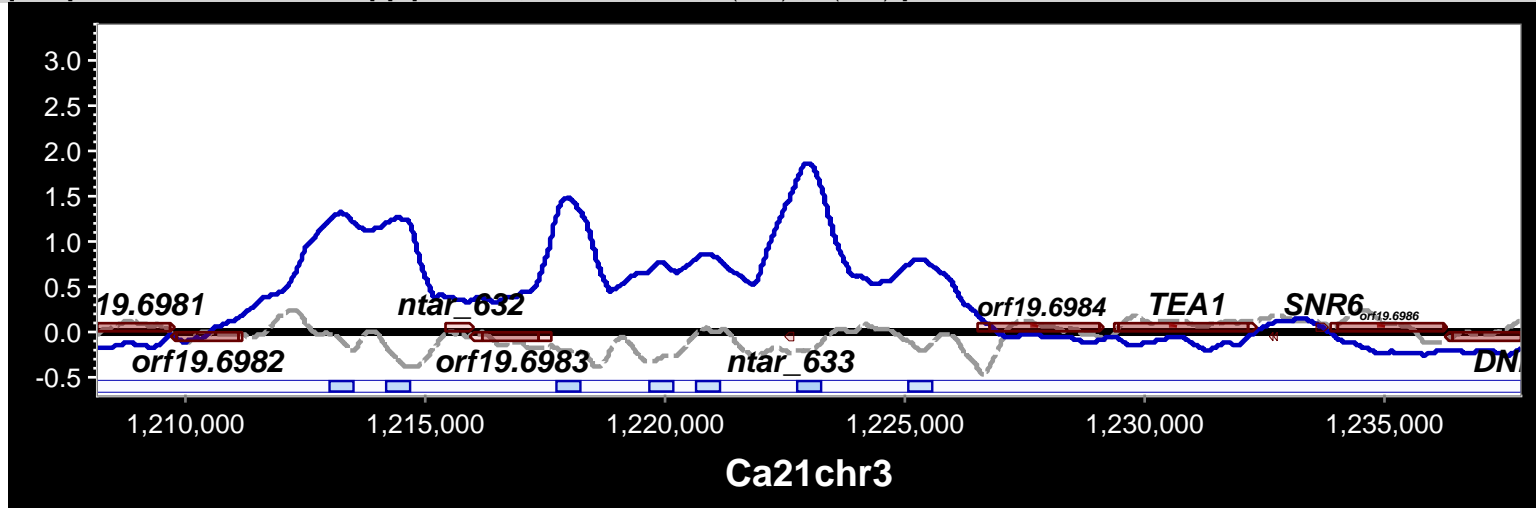

[1.862] Ca21chr6:773790-803473 [+] [ALS1, ALS5, orf19.5735.3, ALS9, CDC50]

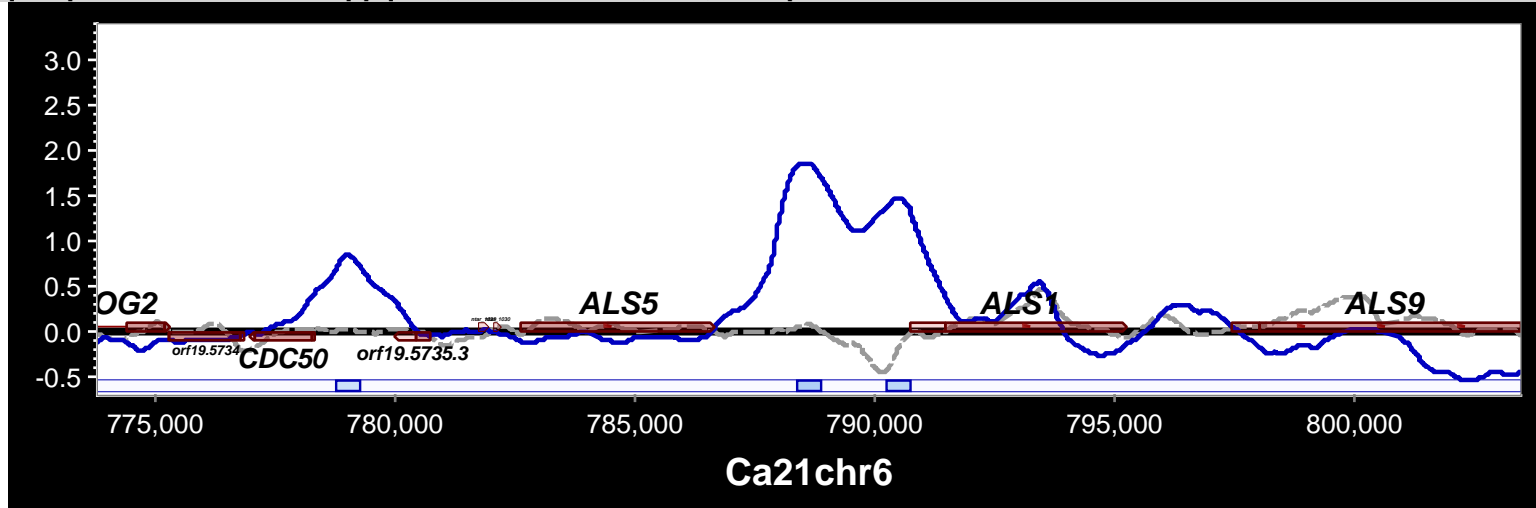

[1.855] Ca21chrR:1396086-1425769 [+] [RGS2, orf19.693, orf19.915, STE2, orf19.697]

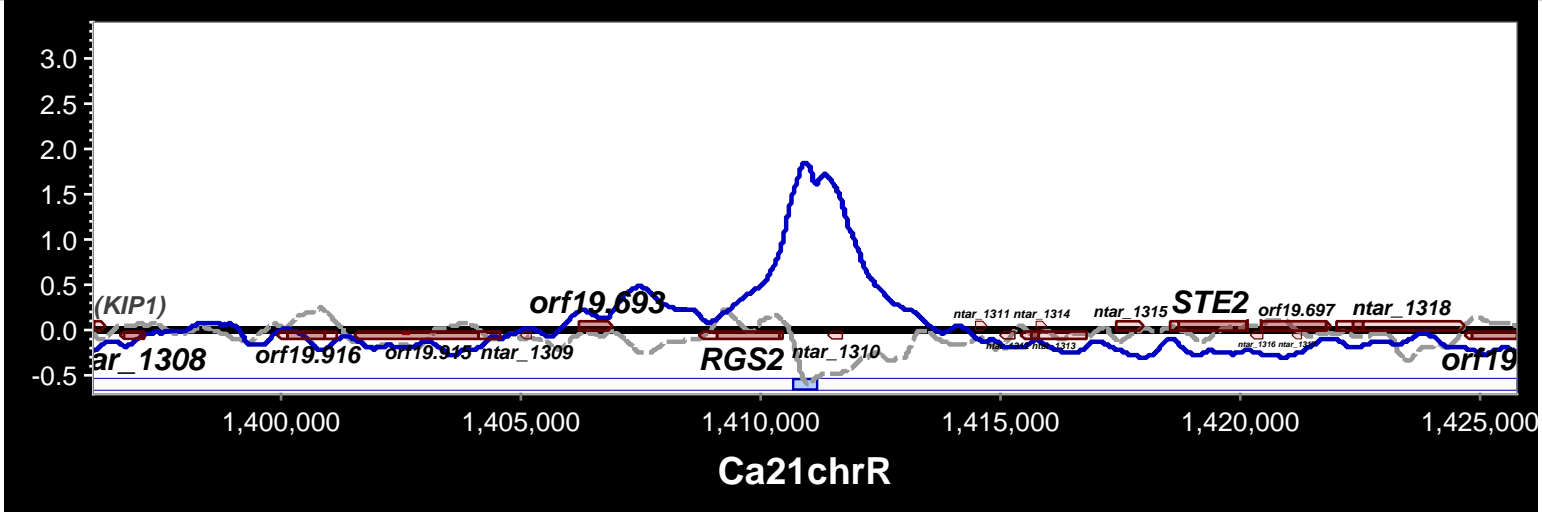

[1.854] Ca21chrR:62340-92023 [+] [orf19.7502, CDA2, orf19.7504, orf19.7501, orf19.7506]

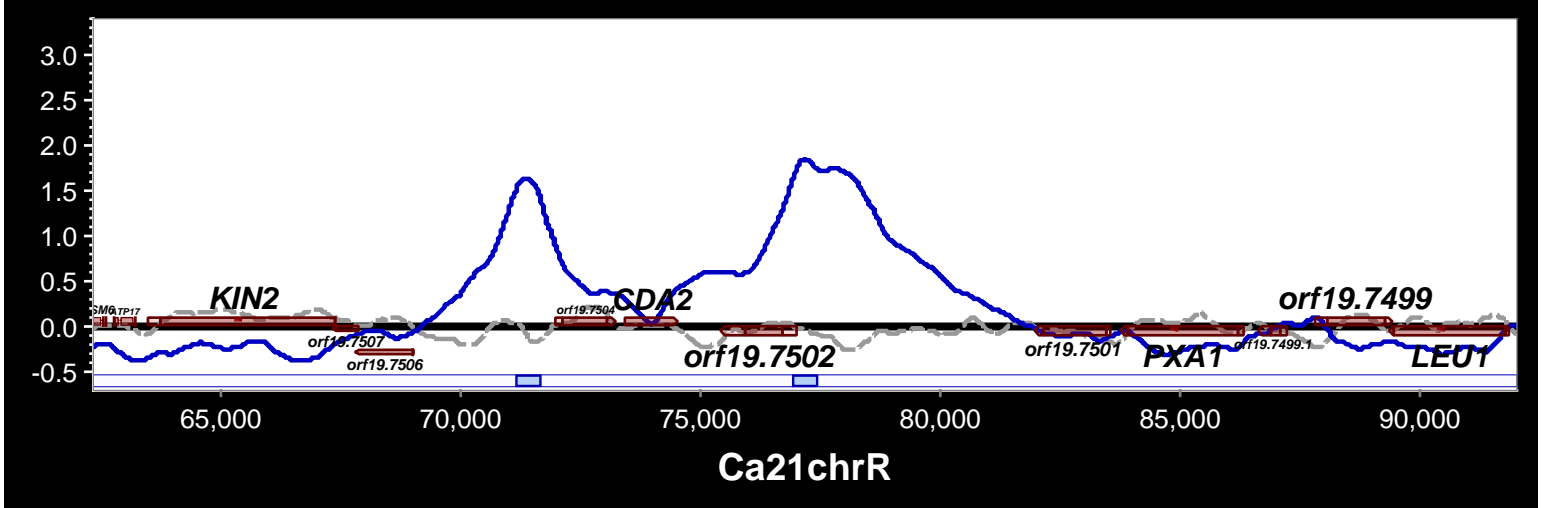

[1.846] Ca21chr1:2837911-2867594 [+] [orf19.4936, orf19.4936.1, OP4, CHS3, FAD3]

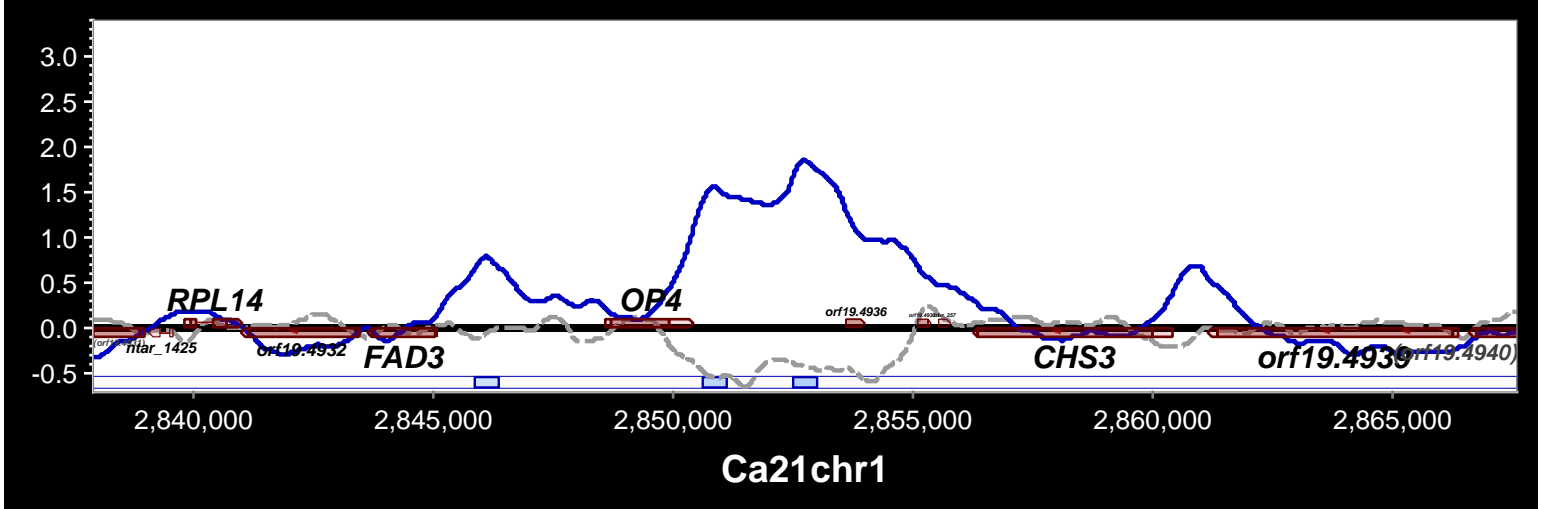

[1.845] Ca21chr3:1243978-1273661 [+] [GTT1, orf19.6997, orf19.6999, orf19.6996, YCK2]

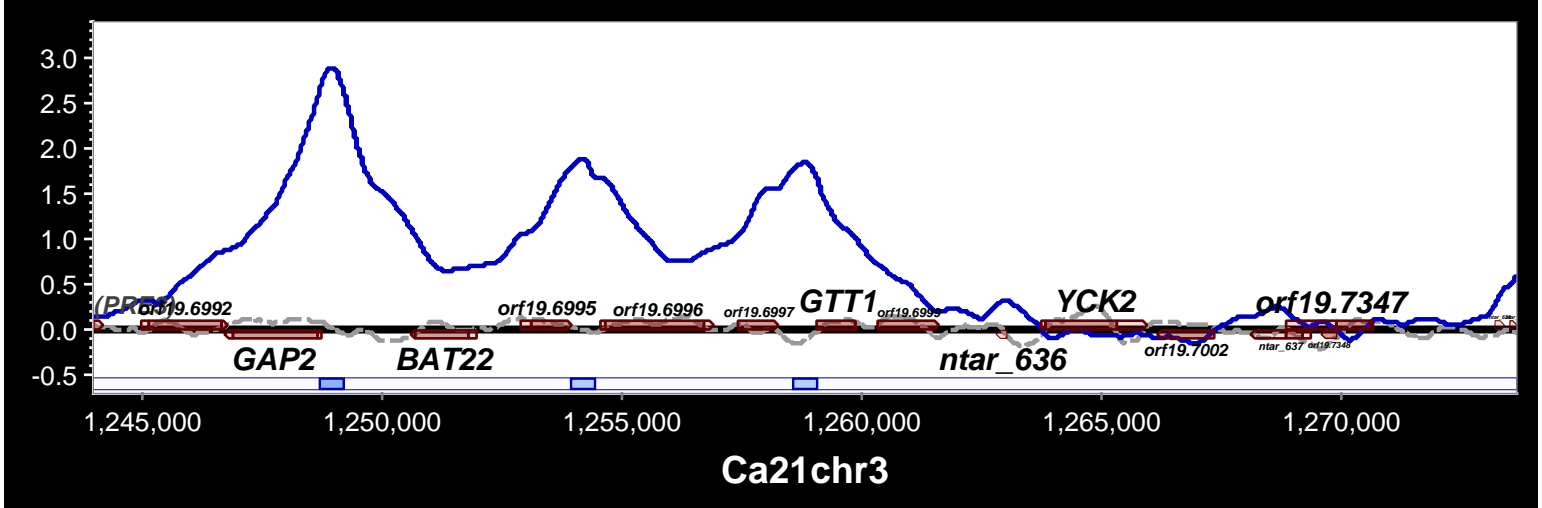

[1.844] Ca21chr1:1221012-1250695 [+] [orf19.2457, orf19.2458, orf19.2455, PHO87, orf19.2459]

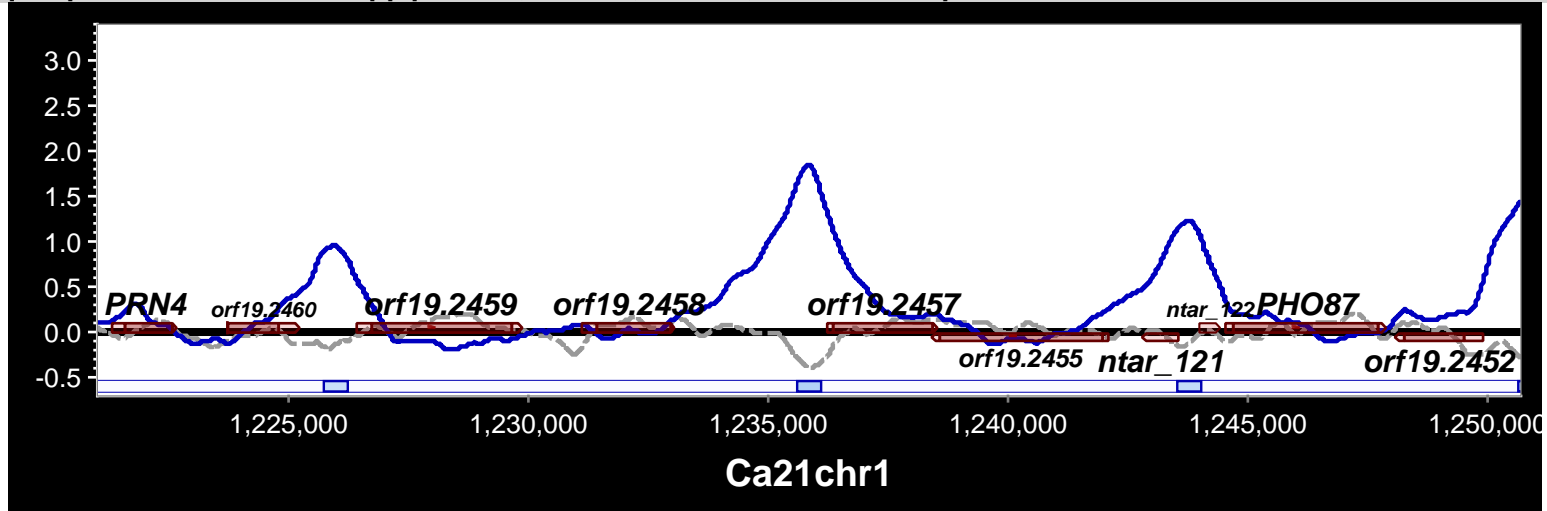

[1.844] Ca21chr2:1325698-1355381 [+] [orf19.35, orf19.34, orf19.35.1, orf19.36, orf19.31]

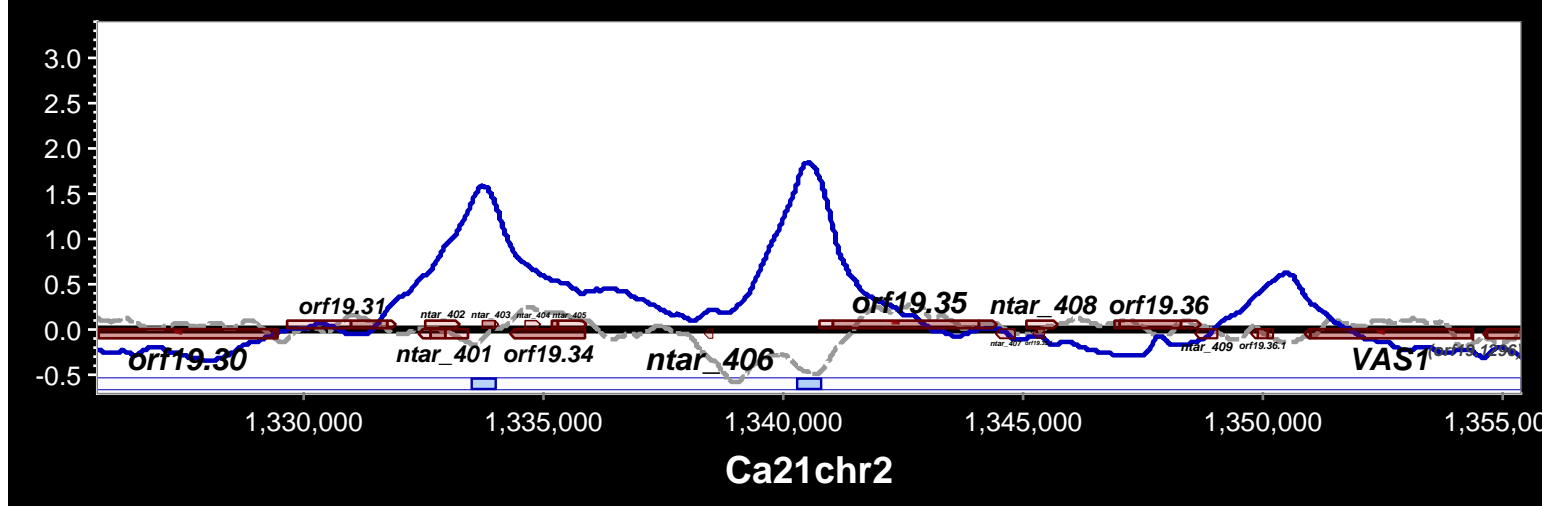

[1.841] Ca21chr6:804751-834434 [+] [HGT10, orf19.5752, orf19.5754, ORM1, orf19.5755]

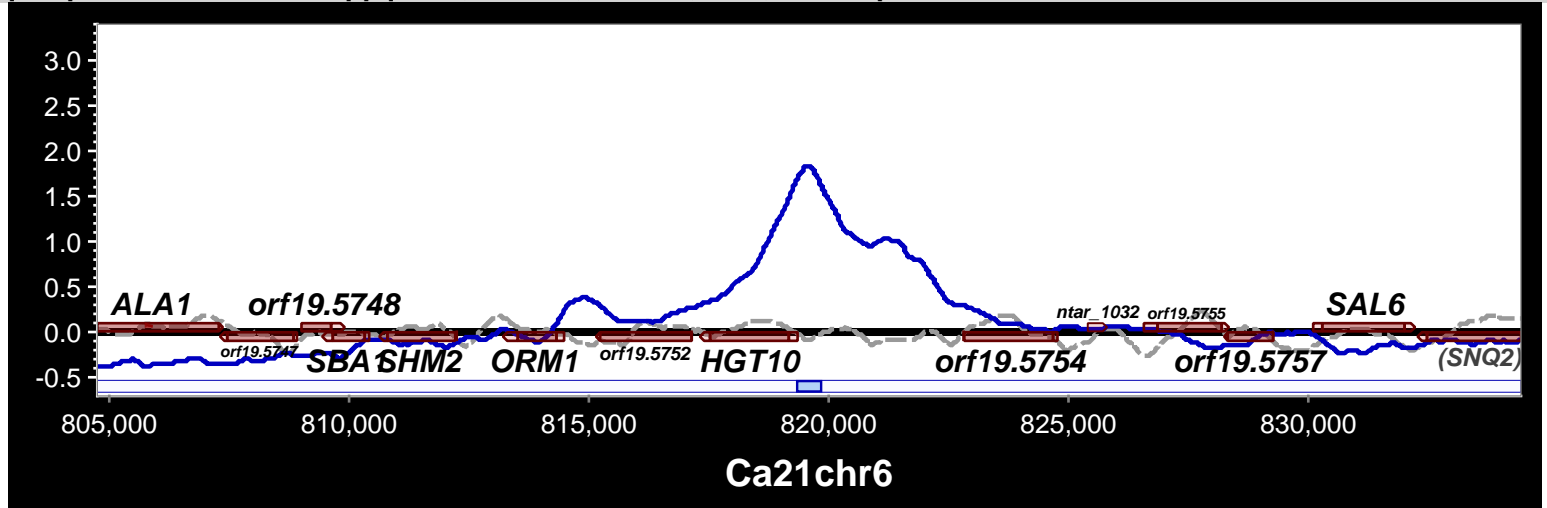

[1.839] Ca21chr1:1640017-1669700 [+] [orf19.2781, orf19.2779, orf19.2782, orf19.2778, PIR32]

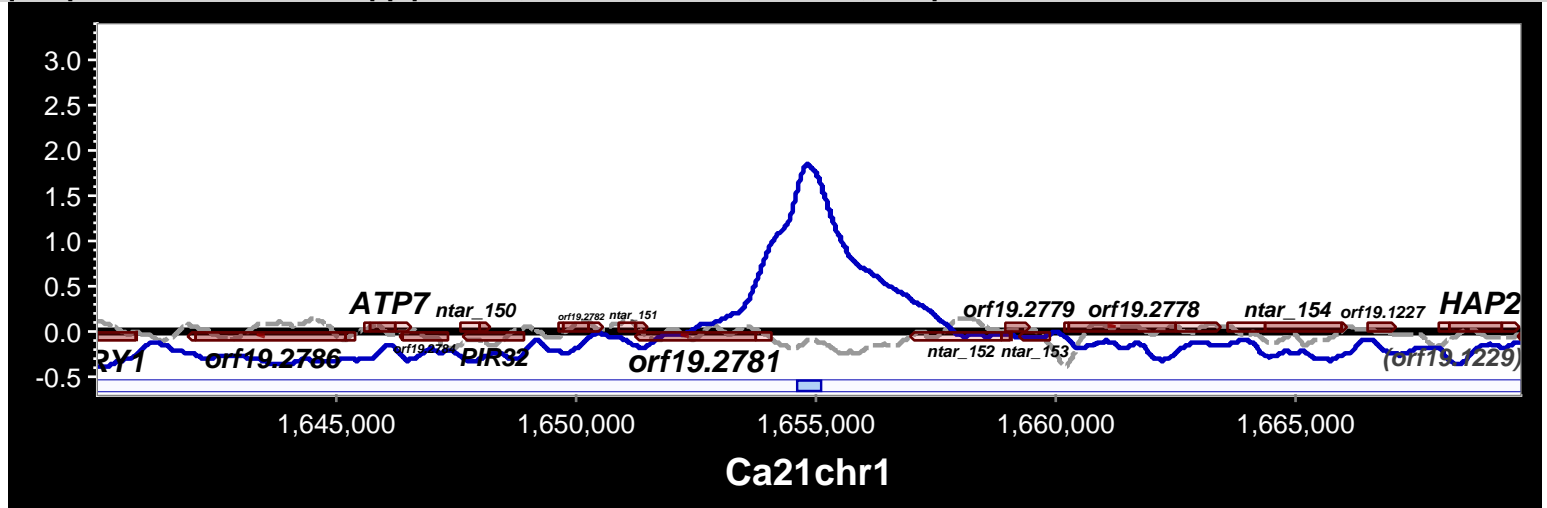

[1.83] Ca21chrR:680704-710387 [+] [HGT18, ZCF11, RPL28, ARC1, orf19.2426]

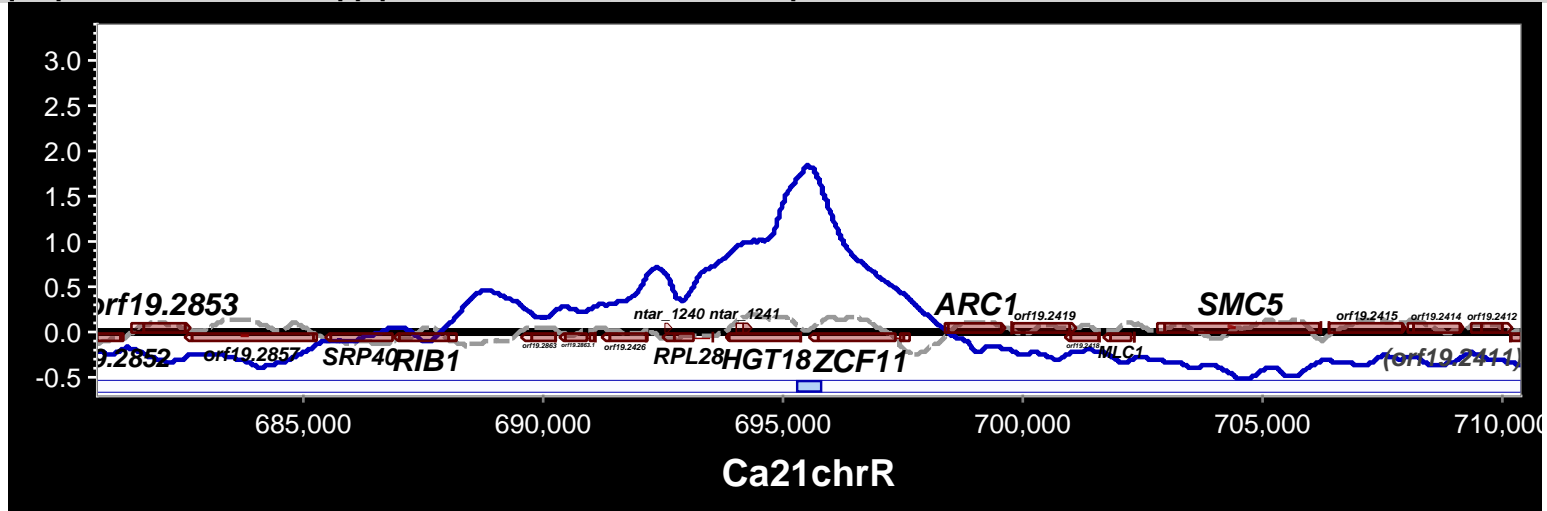

[1.823] Ca21chr3:1345943-1375626 [+] [orf19.7381, CAM1, MNN9, orf19.7380, NOG1]

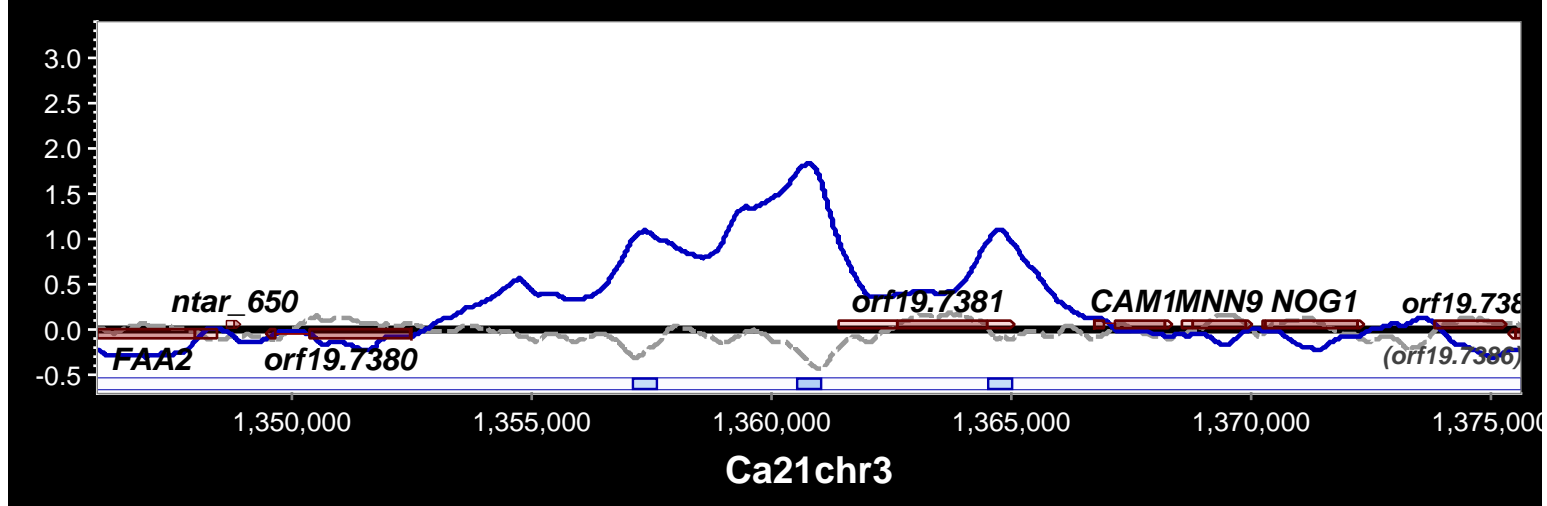

[1.822] Ca21chr3:1769725-1799408 [+] [orf19.6189, orf19.6188, SRB1, orf19.6186, orf19.6185]

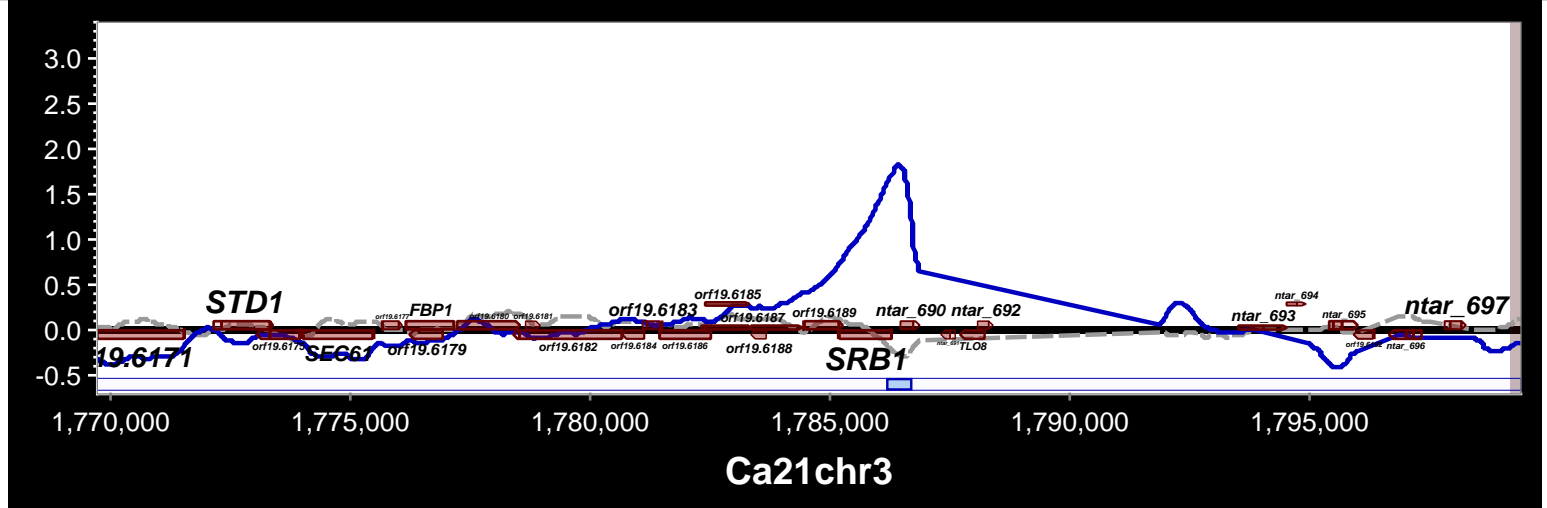

[1.822] Ca21chrR:473590-503273 [+] [orf19.3751, RAD51, SEF1, IFC3, orf19.3748]

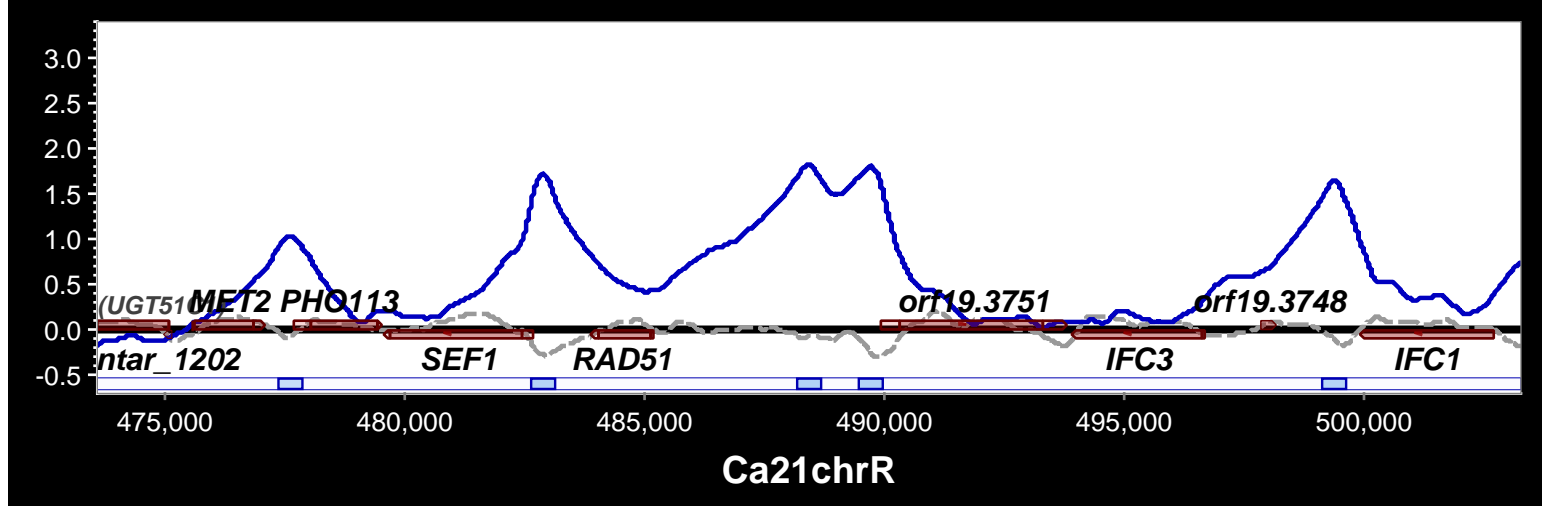

[1.821] Ca21chr4:275542-305225 [+] [UEC1, BEM1, HAP3, orf19.4643, orf19.4649]

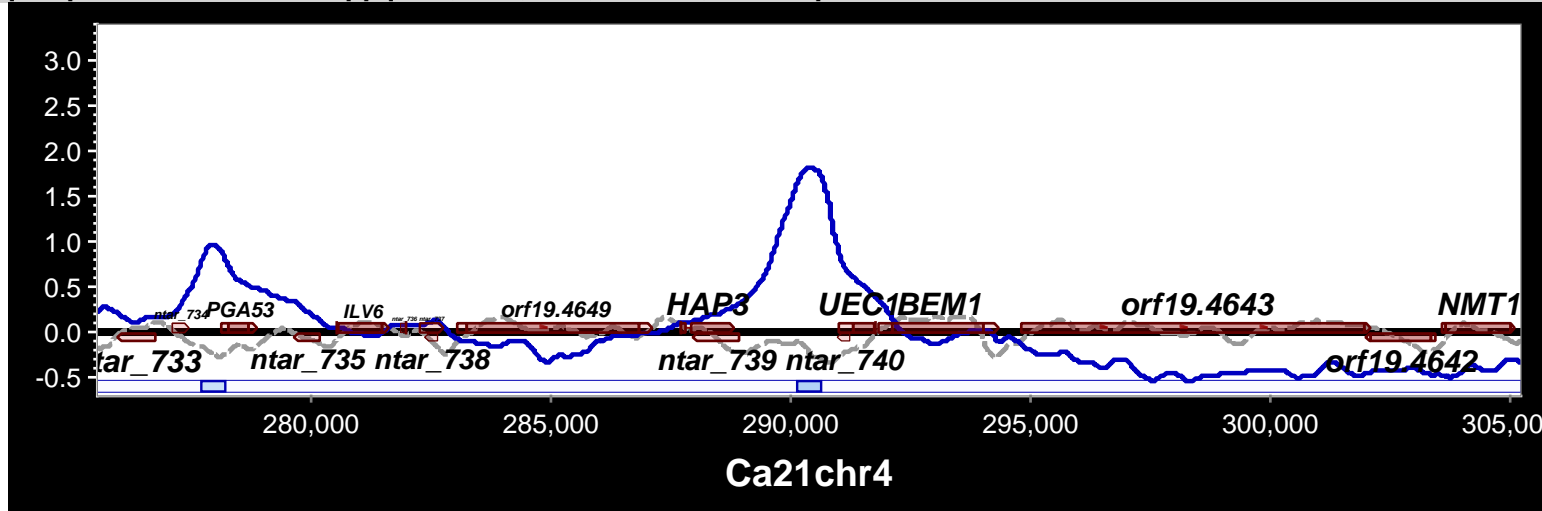

[1.818] Ca21chr3:392759-422442 [+] [tV(AAC)2, MNT2, orf19.1662, DBP5, tK(UUU)1]

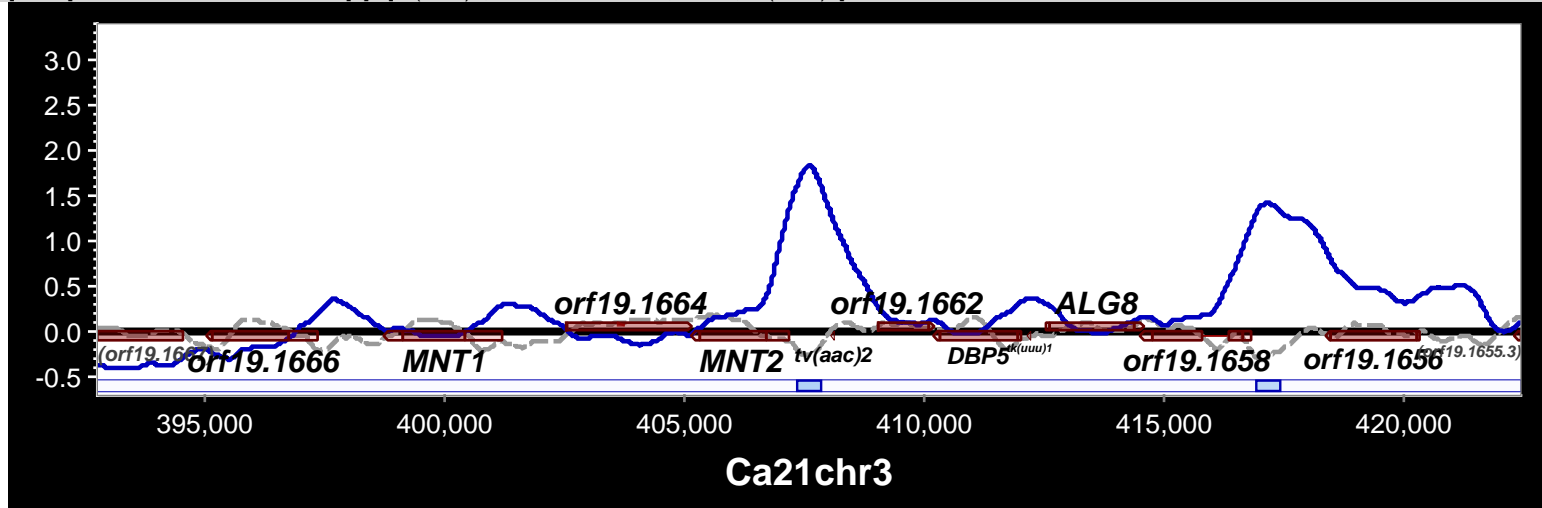

[1.818] Ca21chr3:1428824-1458507 [+] [ISW2, ALS7, TSA1B, DOT1, HNT2]

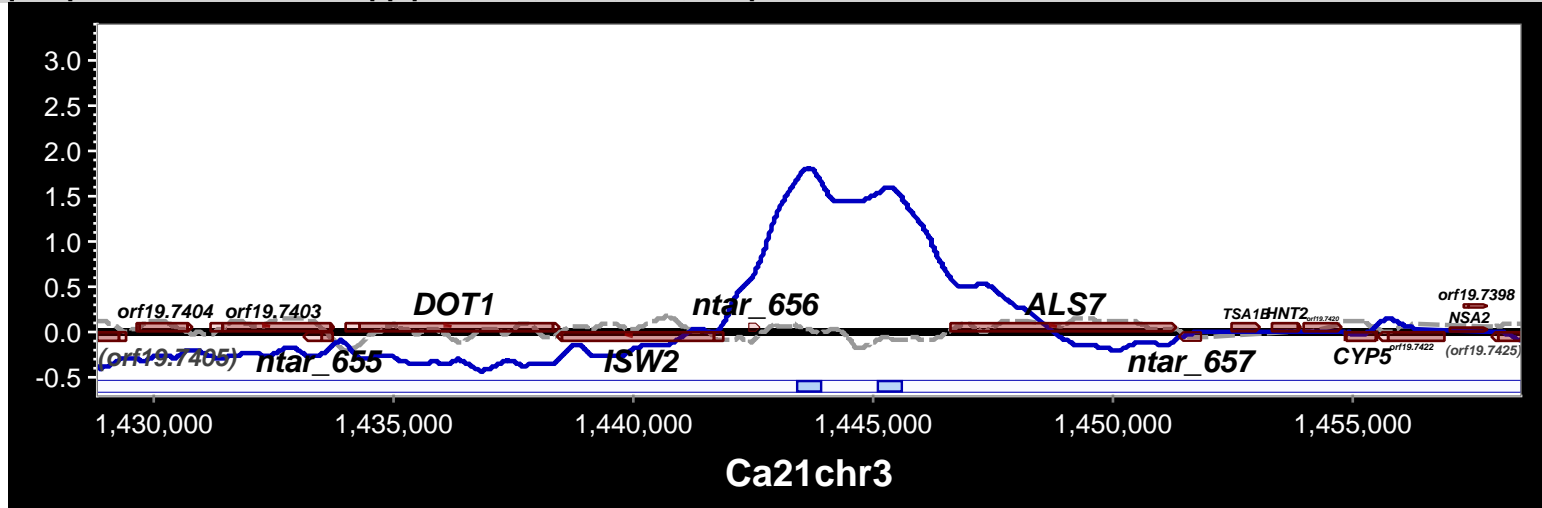

[1.817] Ca21chr1:341868-371551 [+] [CTN1, tA(AGC)3, orf19.4550, orf19.3360, FGR38]

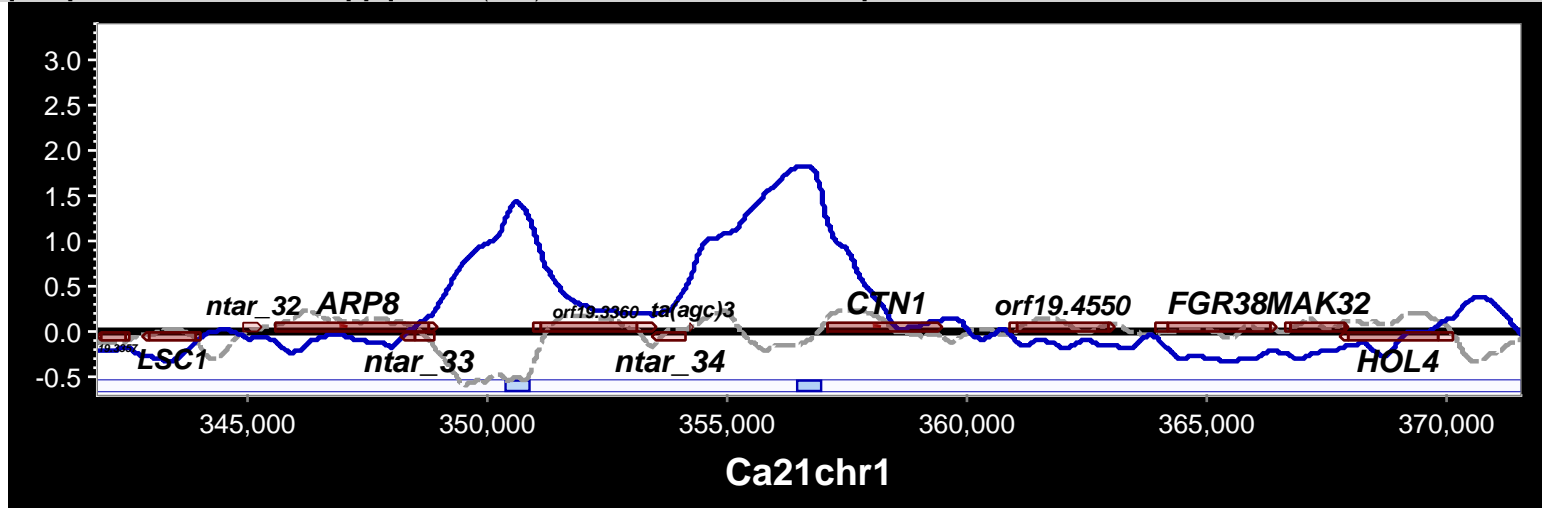



[1.813] Ca21chr3:1576114-1605797 [+] [orf19.6805, tY(GUA)3, orf19.6804, orf19.6807, orf19.6809]

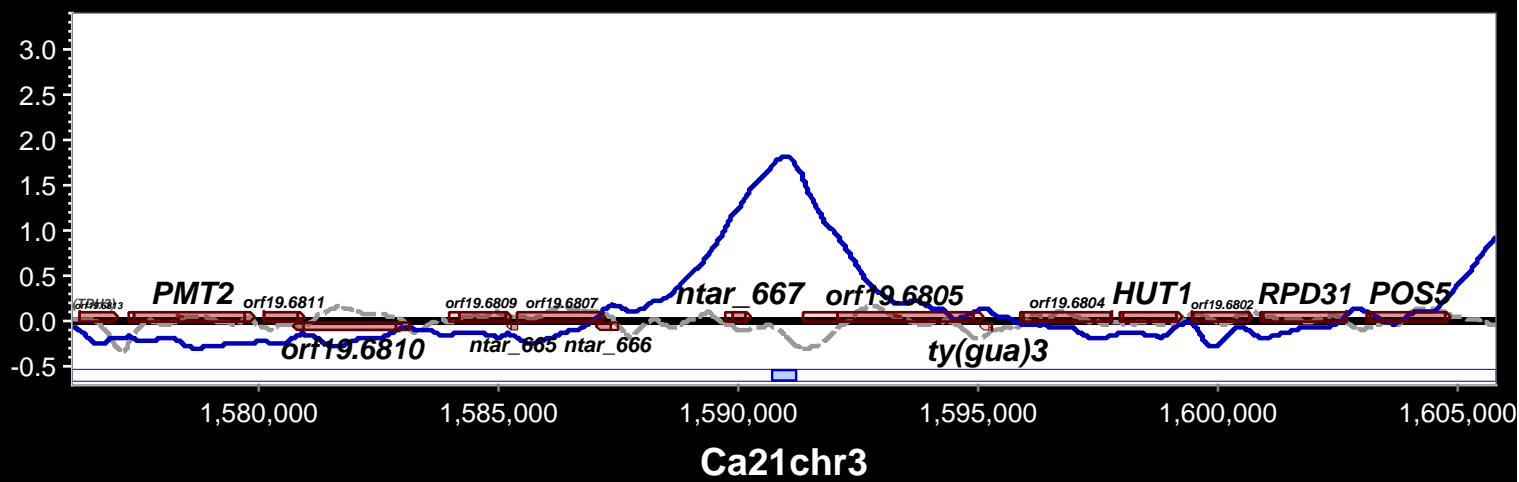

[1.809] Ca21chr2:347688-377371 [+] [orf19.1505, orf19.1504, orf19.1507, orf19.1508, orf19.1502]

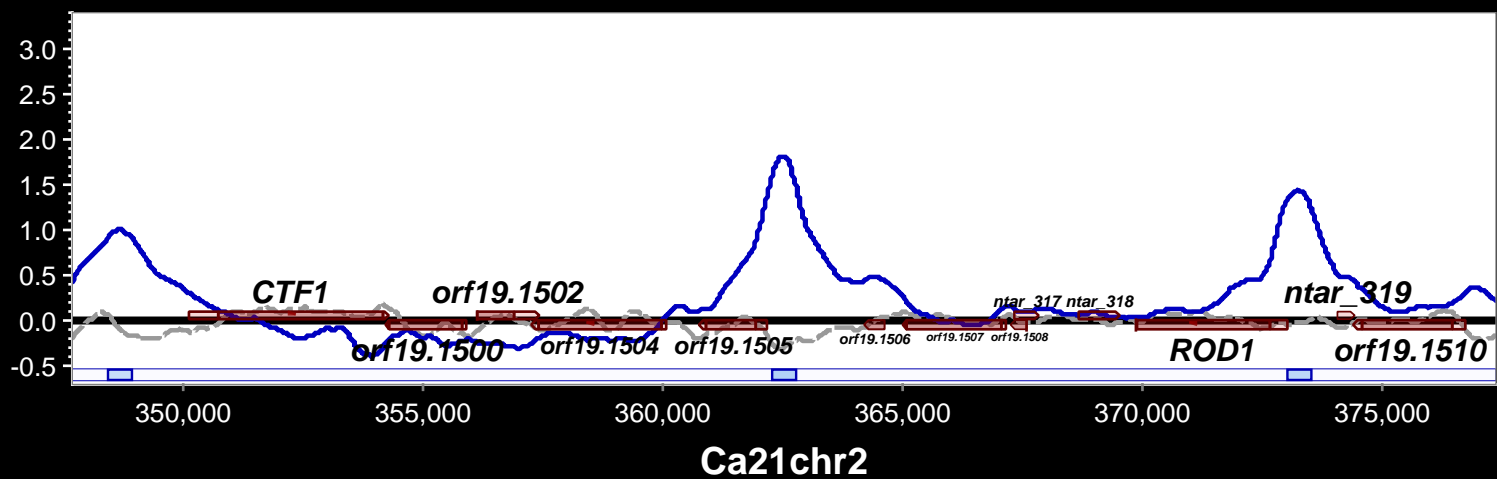

[1.806] Ca21chr5:840404-870087 [+] [orf19.1105.3, PGA56, orf19.1105, orf19.3220, orf19.1106]

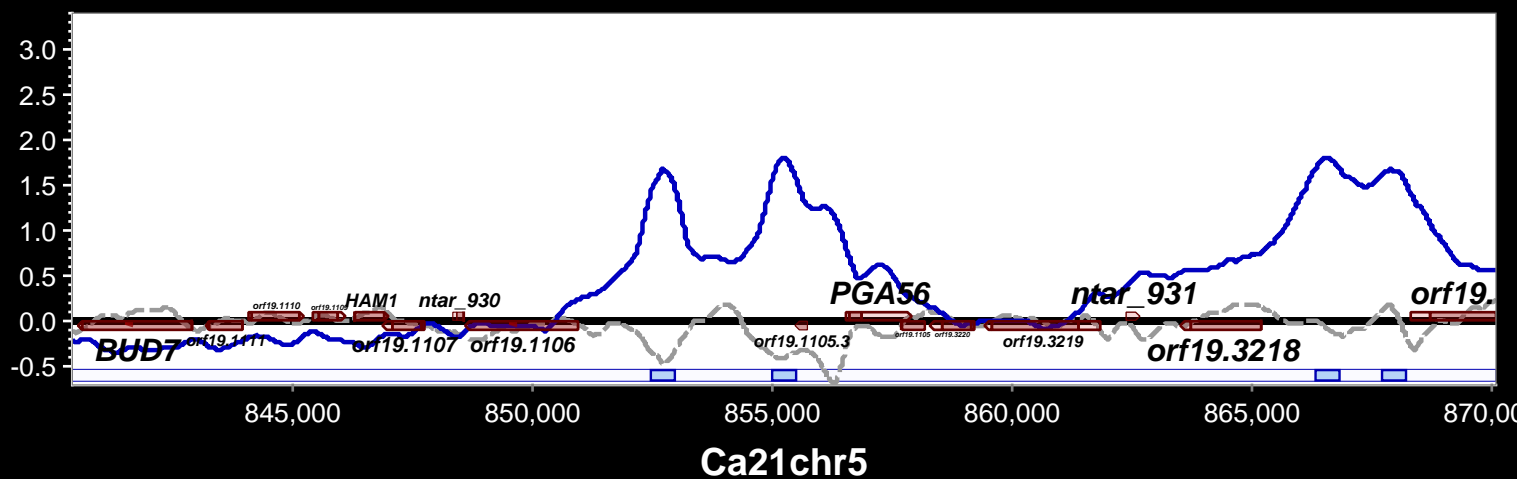

[1.8] Ca21chrR:474875-504558 [+] [orf19.3751, RAD51, IFC3, SEF1, orf19.3748]

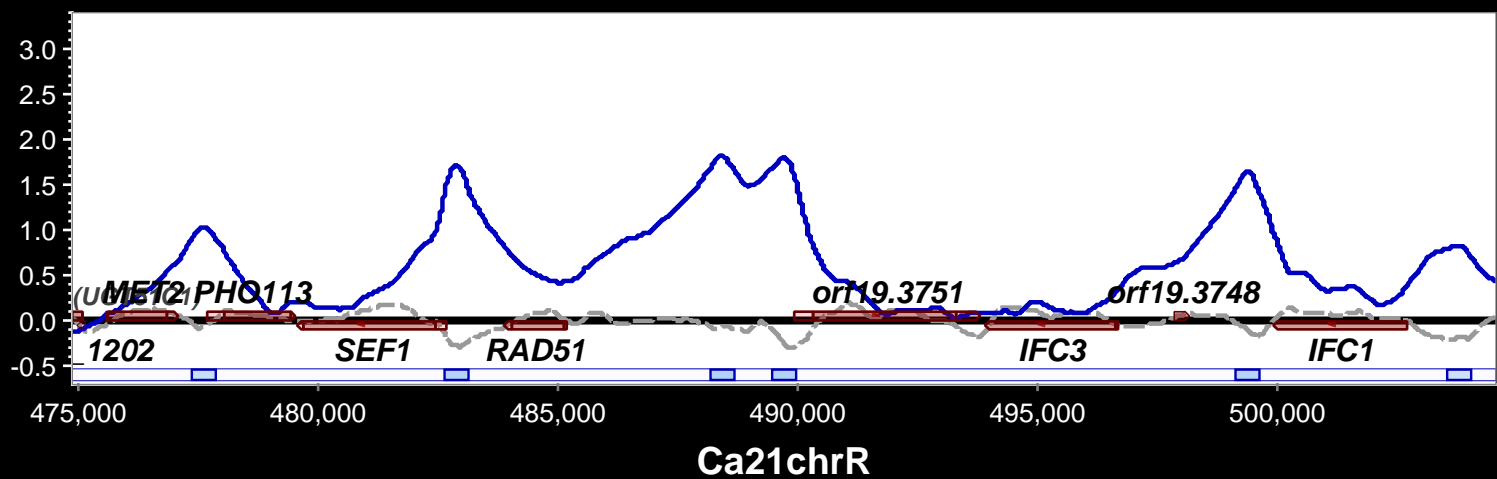

[1.799] Ca21chr6:75363-105046 [+] [FET3, orf19.4210, FET99, orf19.4209, RAD52]

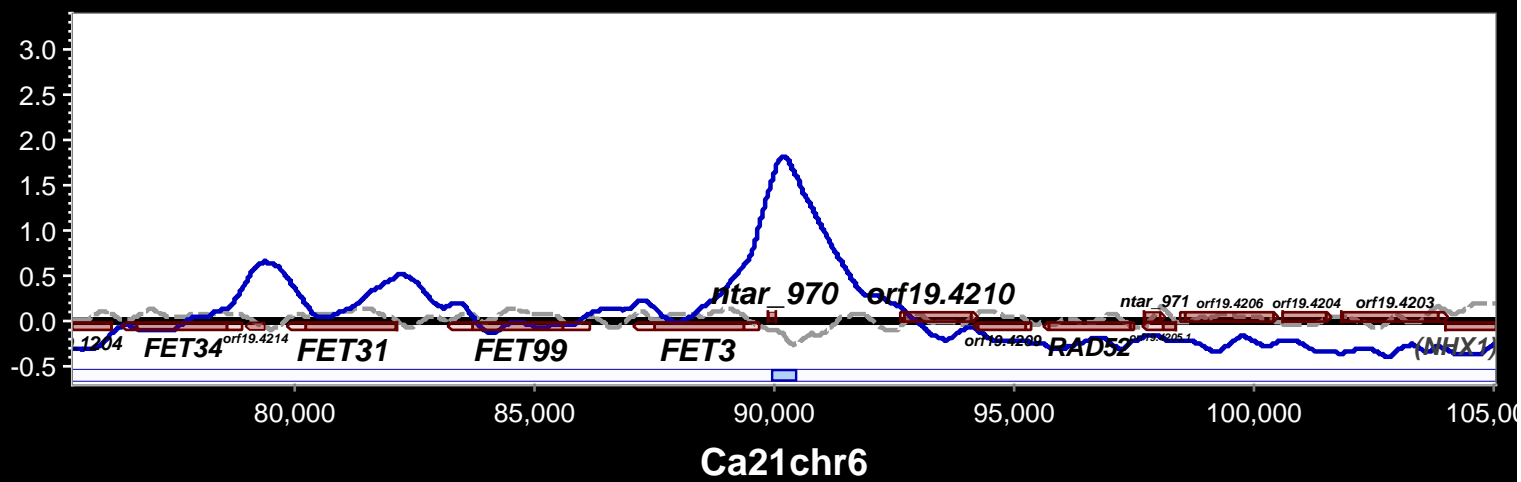

[1.794] Ca21chr1:457873-487556 [+] [CWH8, orf19.3681, orf19.3683, orf19.3684, SEP7]

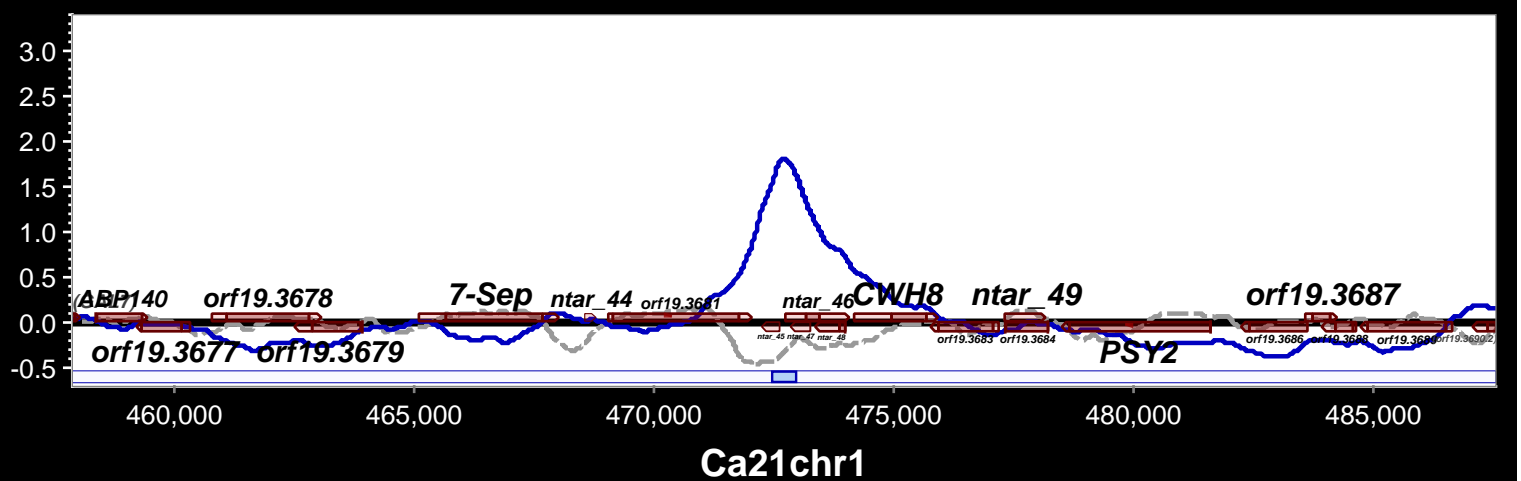

[1.786] Ca21chr4:830530-860213 [+] [orf19.787.1, orf19.787, orf19.1207, PYC2, orf19.1208]

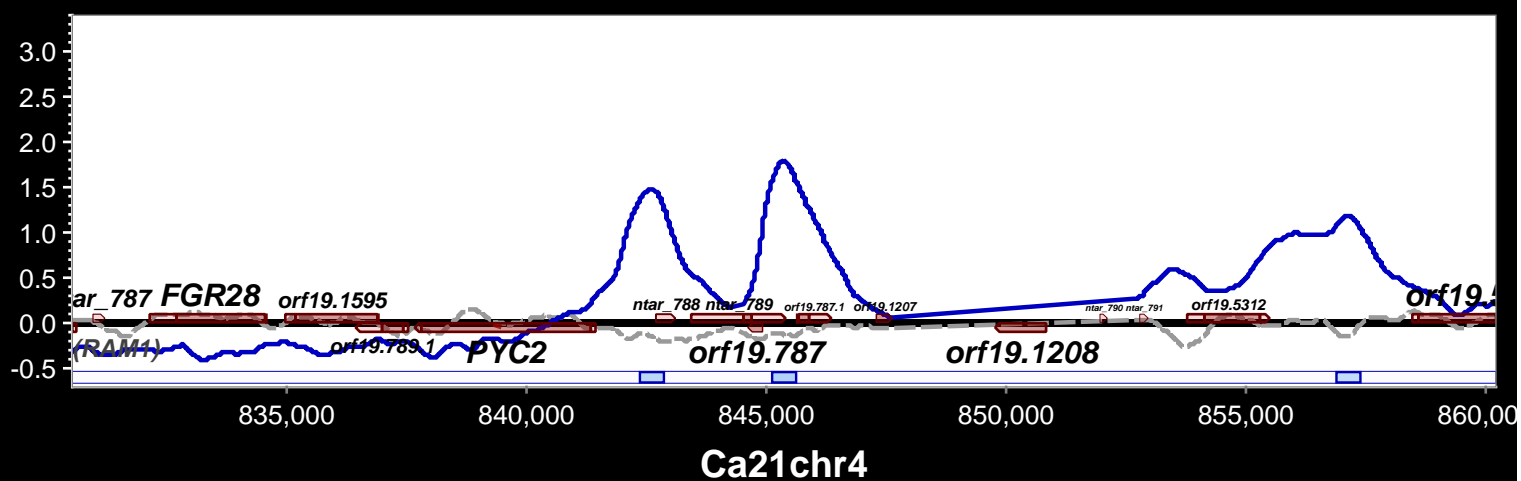

[1.786] Ca21chr5:851734-881417 [+] [orf19.3218, orf19.3216, orf19.3219, orf19.3215, orf19.3214]

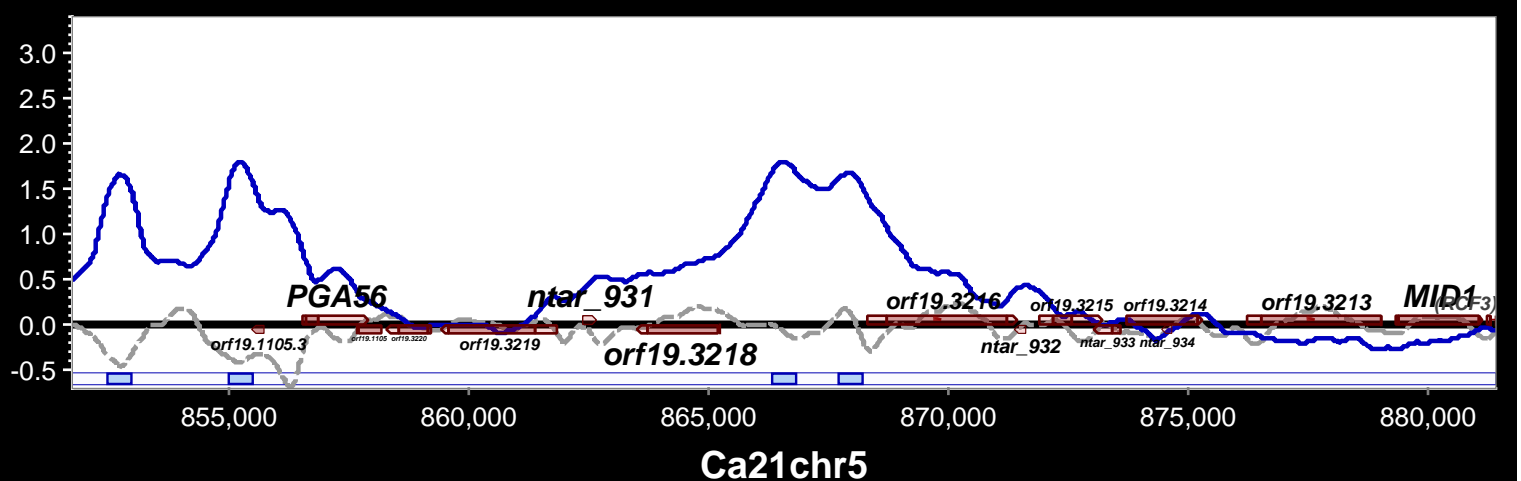

[1.785] Ca21chr2:3535-33218 [+] [orf19.1906, EMC9, NDT80, LEU5, orf19.1910]

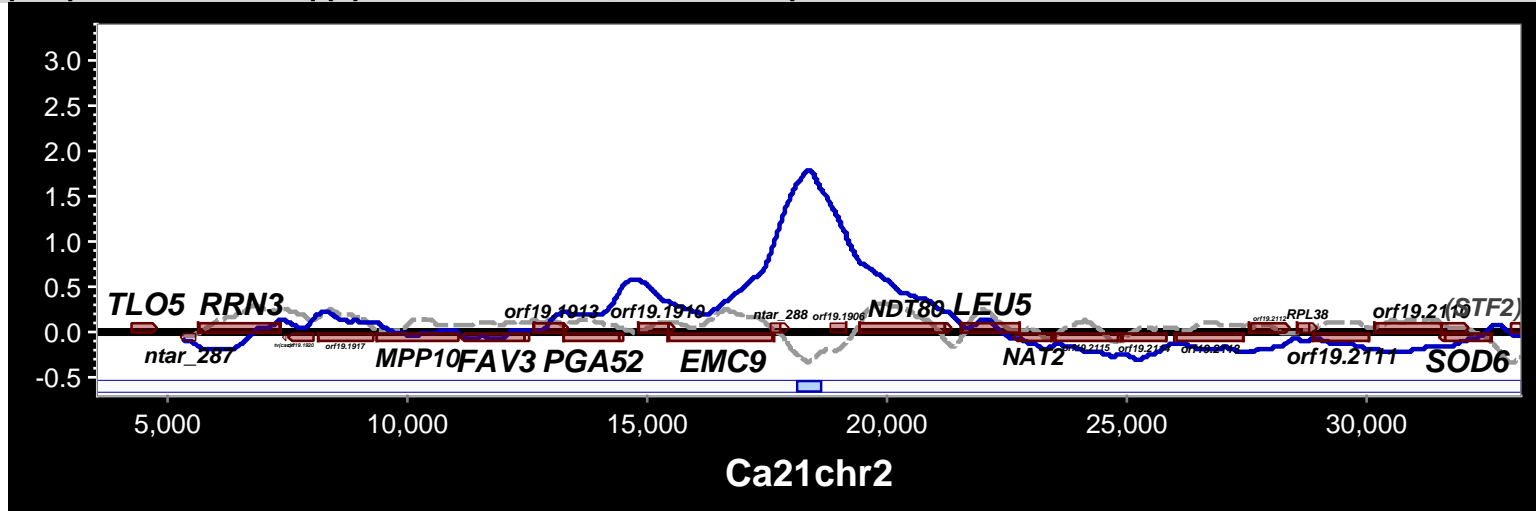

[1.774] Ca21chr4:714152-743835 [+] [ECE1, orf19.3373, orf19.3376, orf19.3371, orf19.3378]

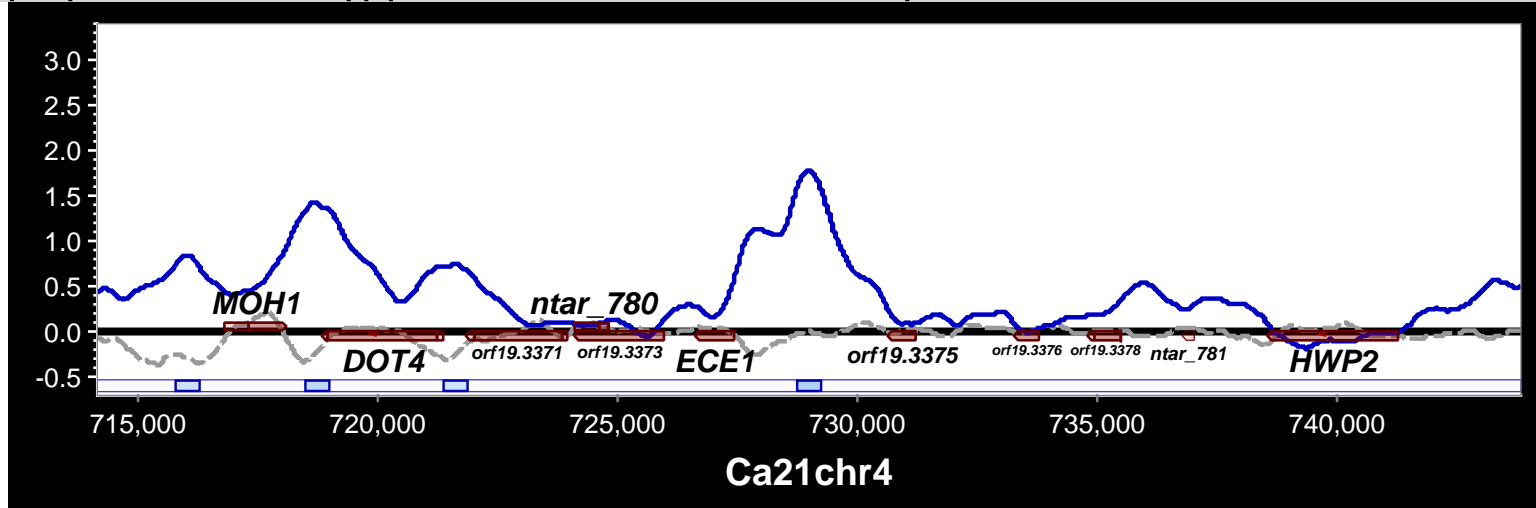

[1.771] Ca21chr4:113627-143310 [+] [orf19.4167, orf19.4168, orf19.4169, orf19.4166, orf19.4170]

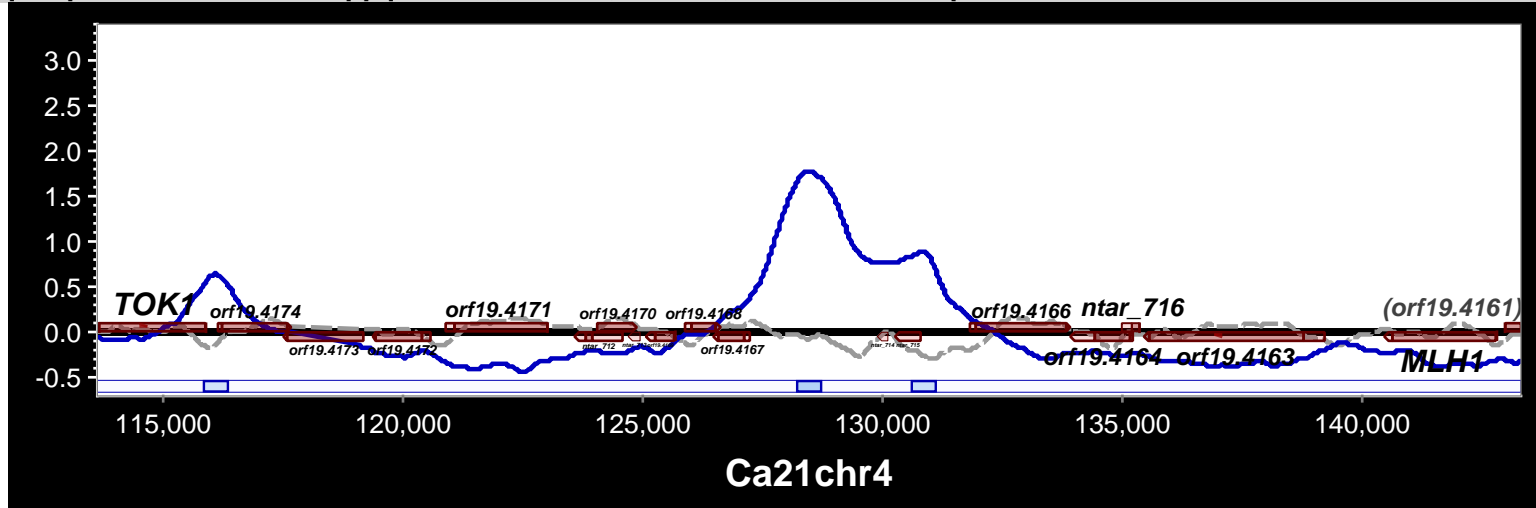

[1.767] Ca21chrR:360908-390591 [+] [orf19.2553, URA5, orf19.2552, SEC65, orf19.2558]

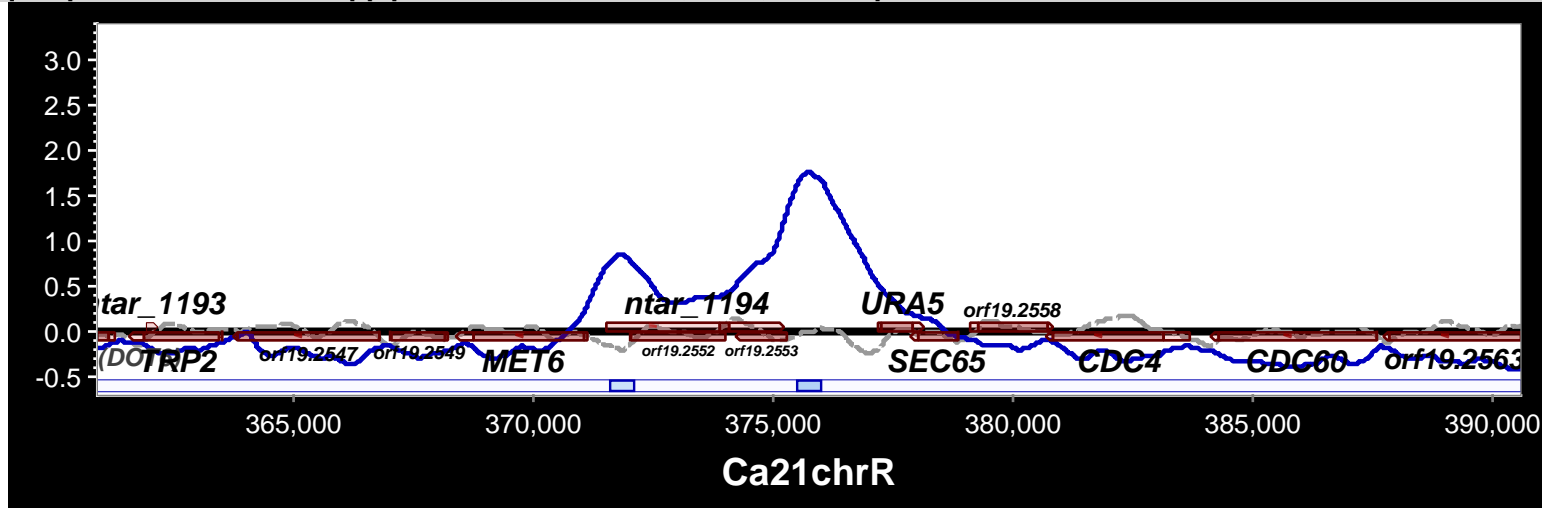

[1.762] Ca21chr5:232481-262164 [+] [CLN3, orf19.1959, orf19.1961, CYC3]

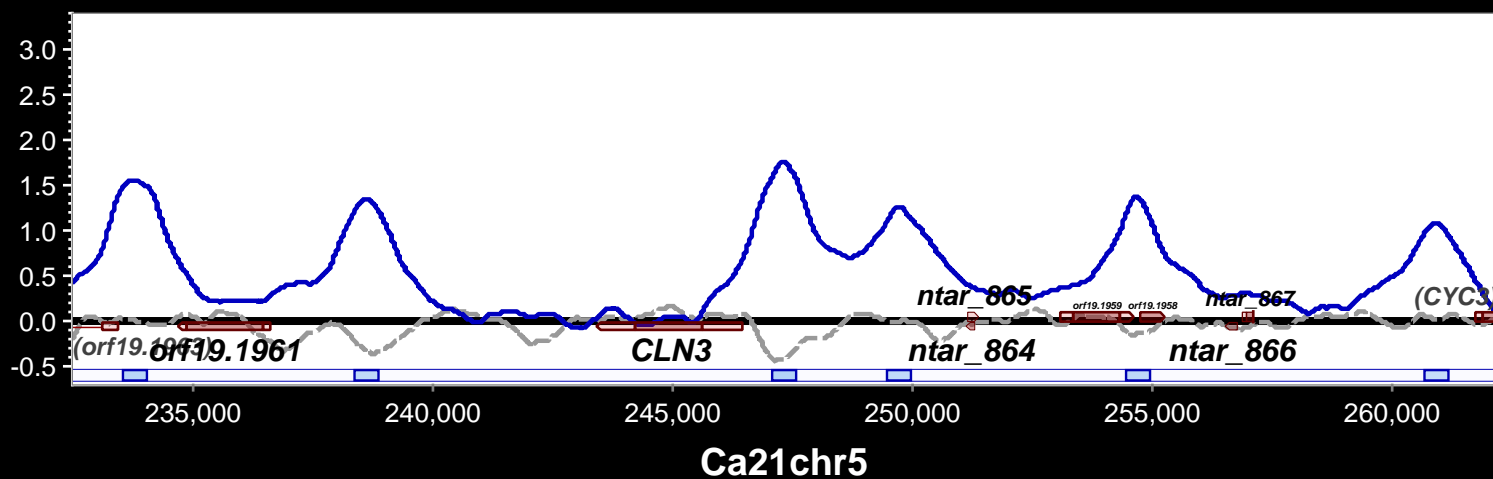

[1.754] Ca21chr6:274027-303710 [+] [FRP5, orf19.3439, FRP6, orf19.3442, orf19.3438]

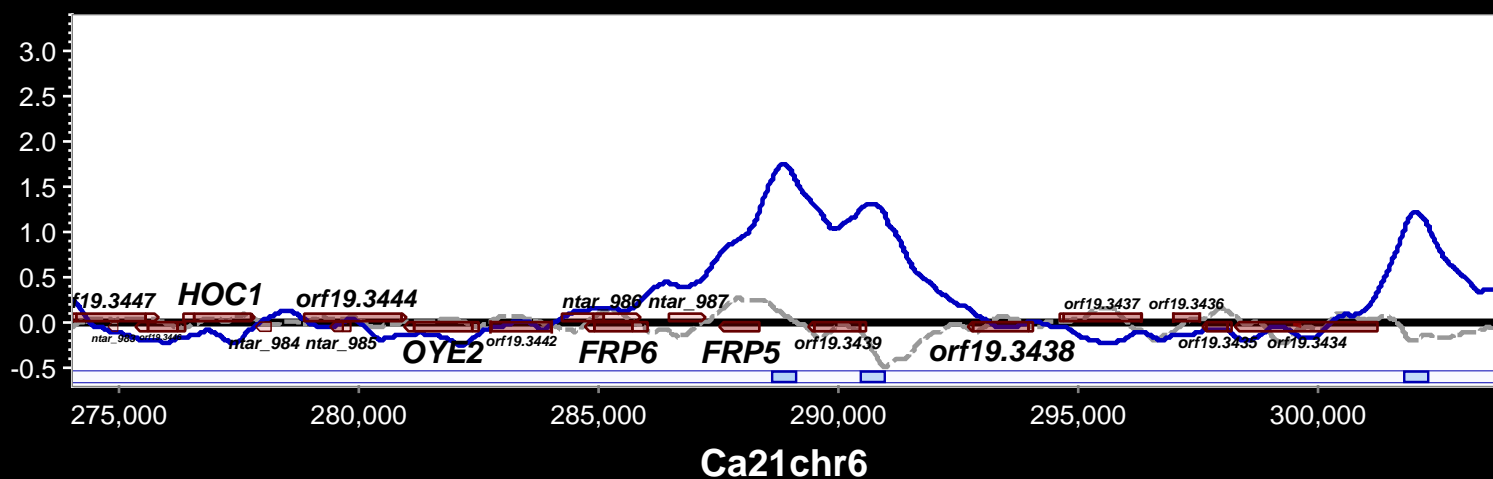

[1.751] Ca21chr5:882013-911696 [+] [orf19.1286, orf19.1285, orf19.1287, FGR42, MEC1]

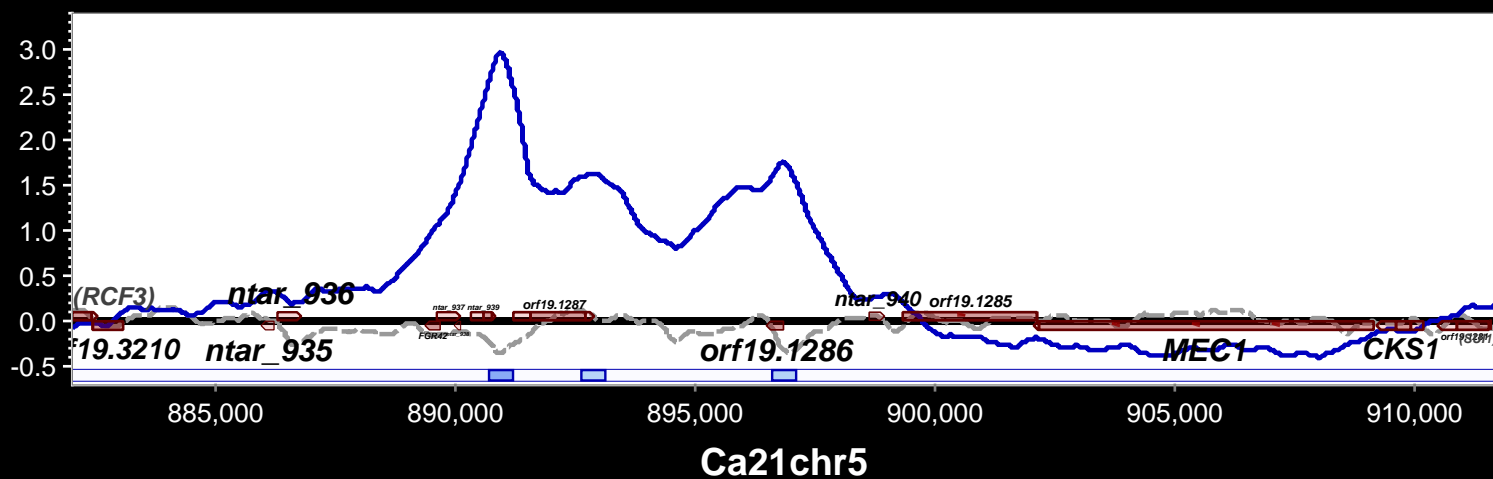

[1.75] Ca21chr1:279227-308910 [+] [orf19.3335, RPS21, orf19.3337, orf19.3333, orf19.3338]

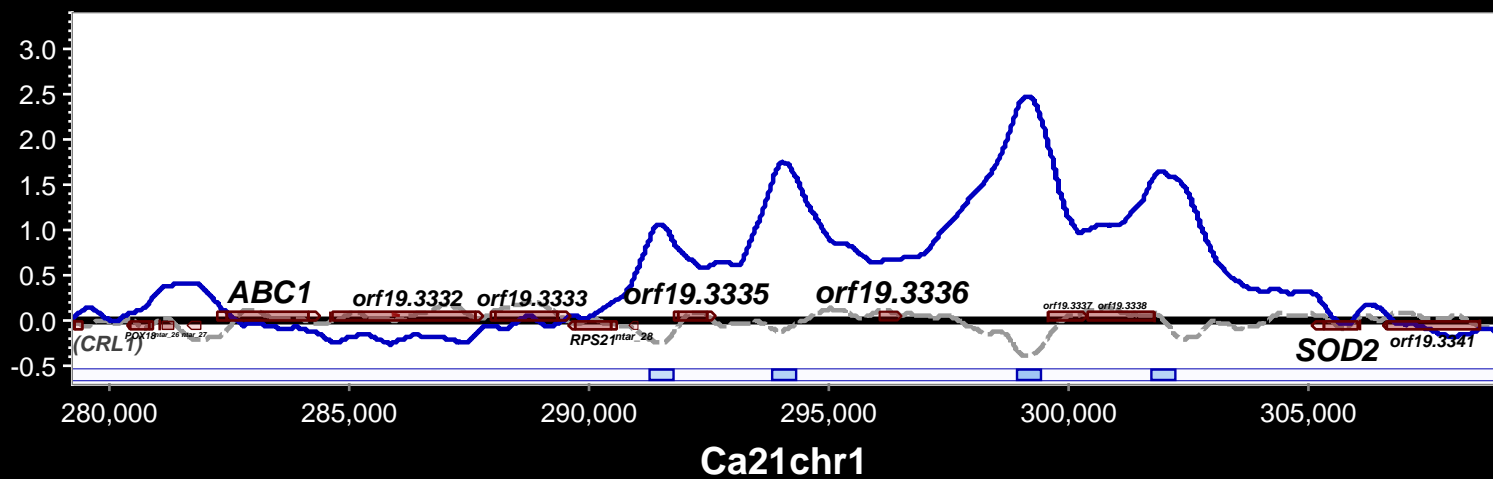

[1.75] Ca21chr2:1901125-1930808 [+] [ERG24, orf19.1599, orf19.1600, ABG1, RRP15]

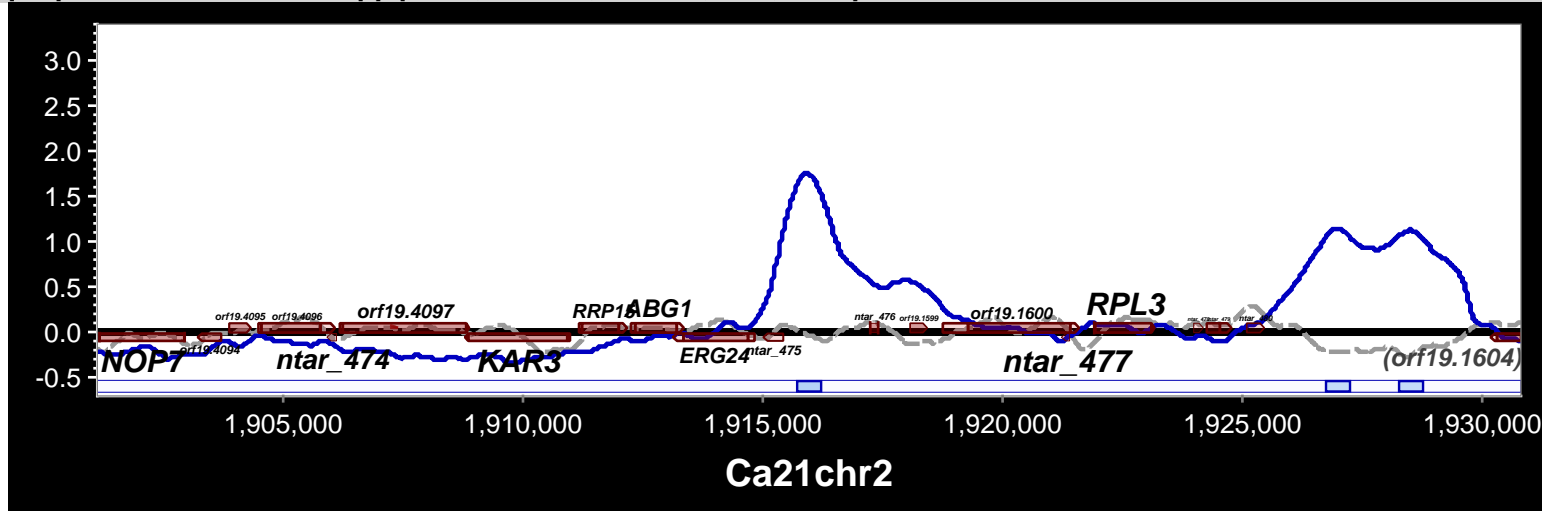

[1.733] Ca21chrR:859698-889381 [+] [orf19.467, IFF9, HST7, orf19.4358, orf19.4357]

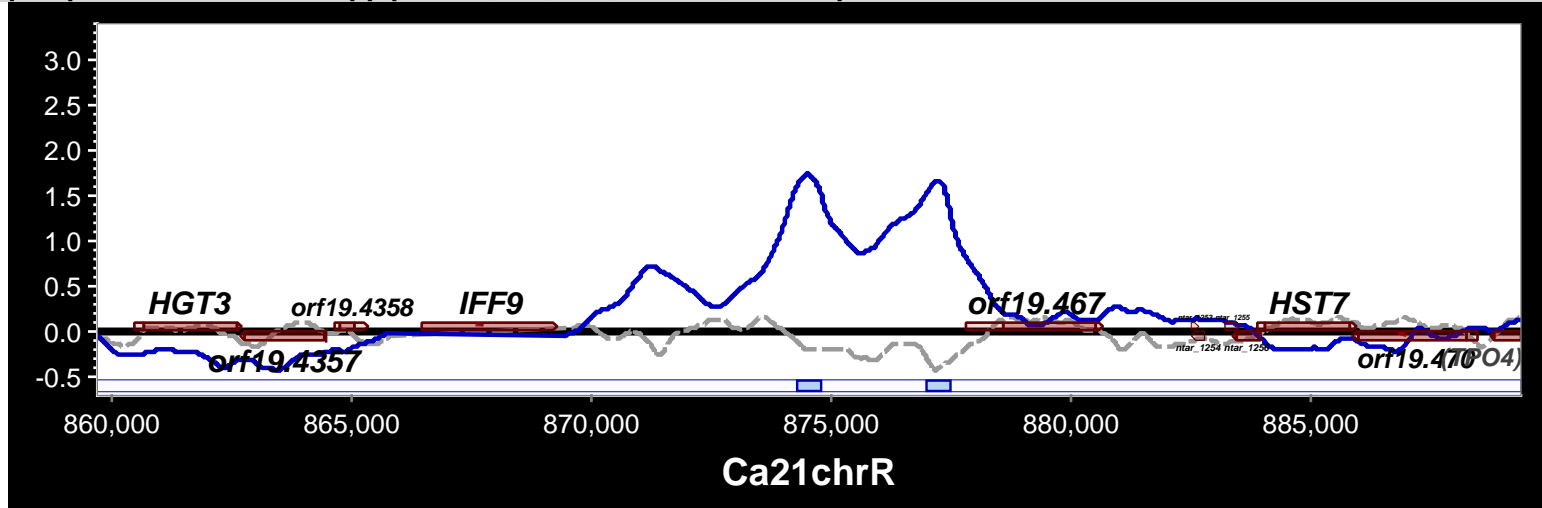

[1.732] Ca21chr4:560748-590431 [+] [HIT1, CGR1, orf19.2724, orf19.2721, orf19.2720]

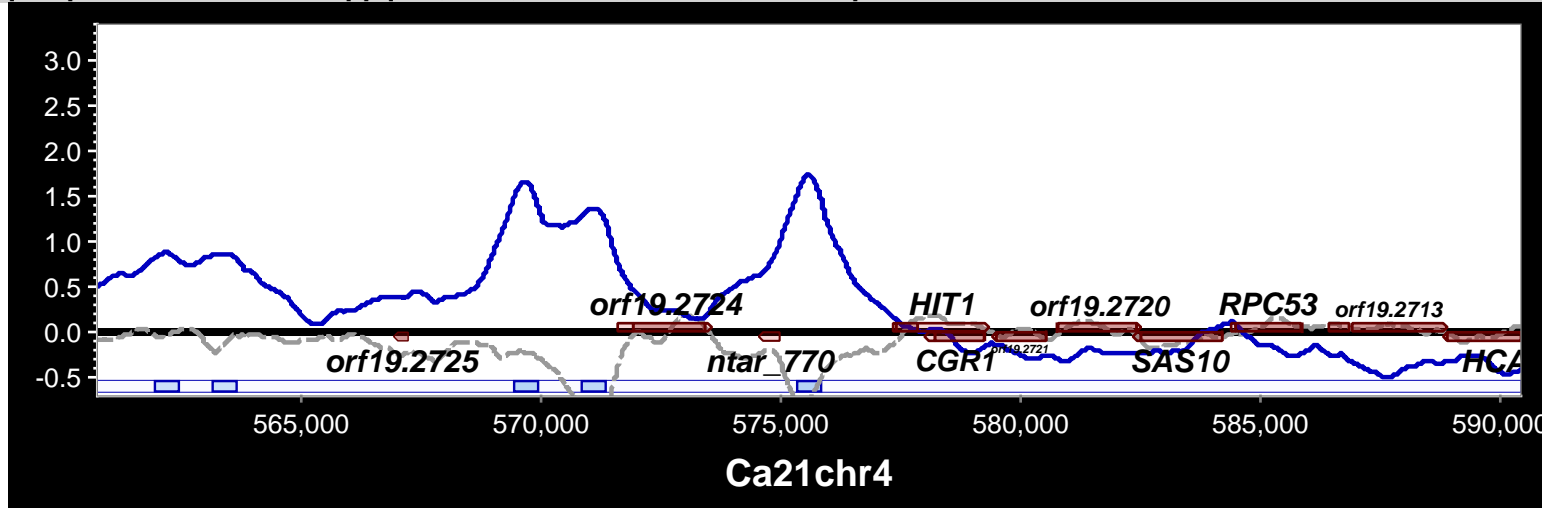

[1.726] Ca21chr3:1103210-1132893 [+] [WOR2, RHB1, orf19.5991, MCA1, RPS19A]

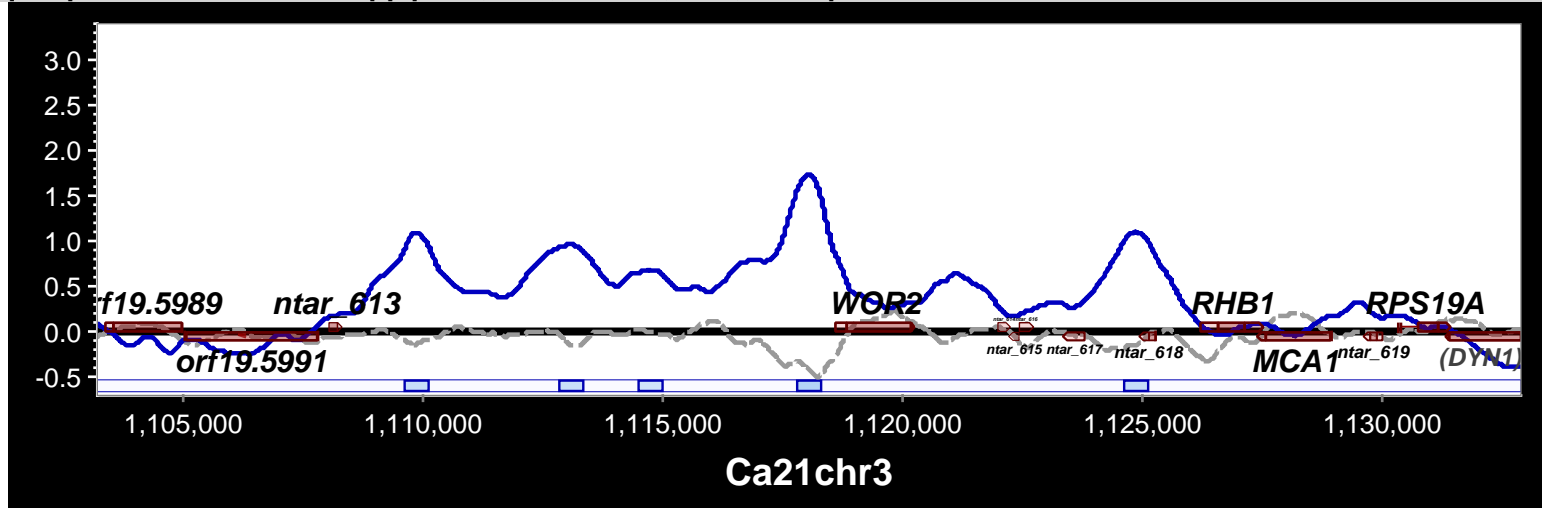

[1.726] Ca21chrR:468044-497727 [+] [SEF1, RAD51, PHO113, MET2, orf19.3751]

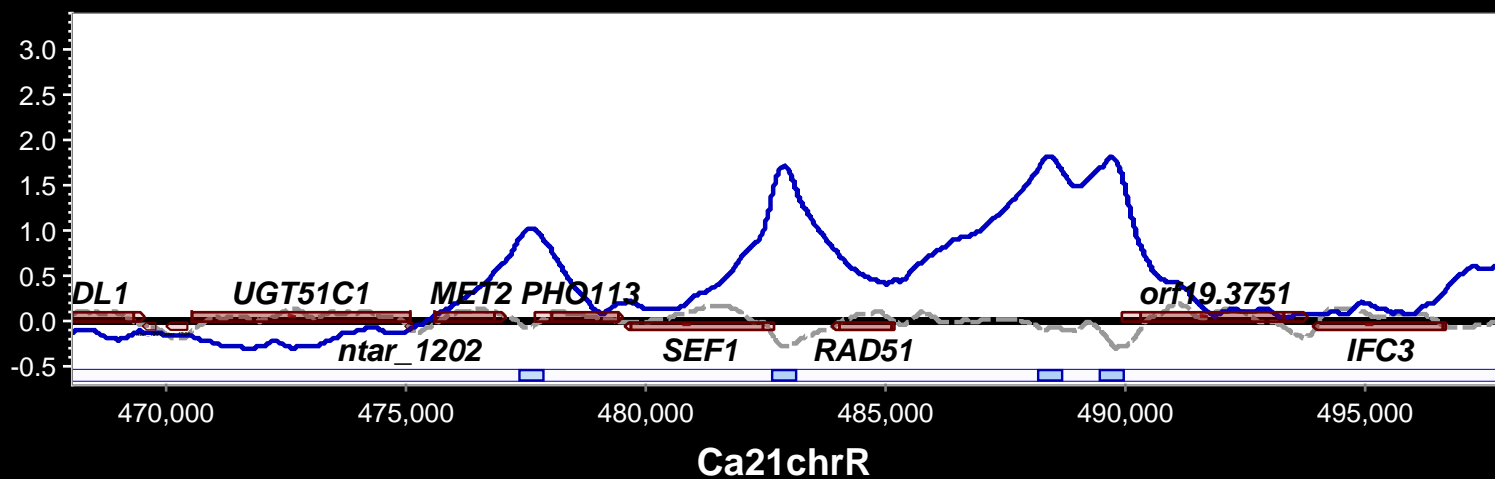

[1.723] Ca21chr3:232004-261687 [+] [orf19.3156, orf19.3158, UTP20, orf19.3154, MSS4]

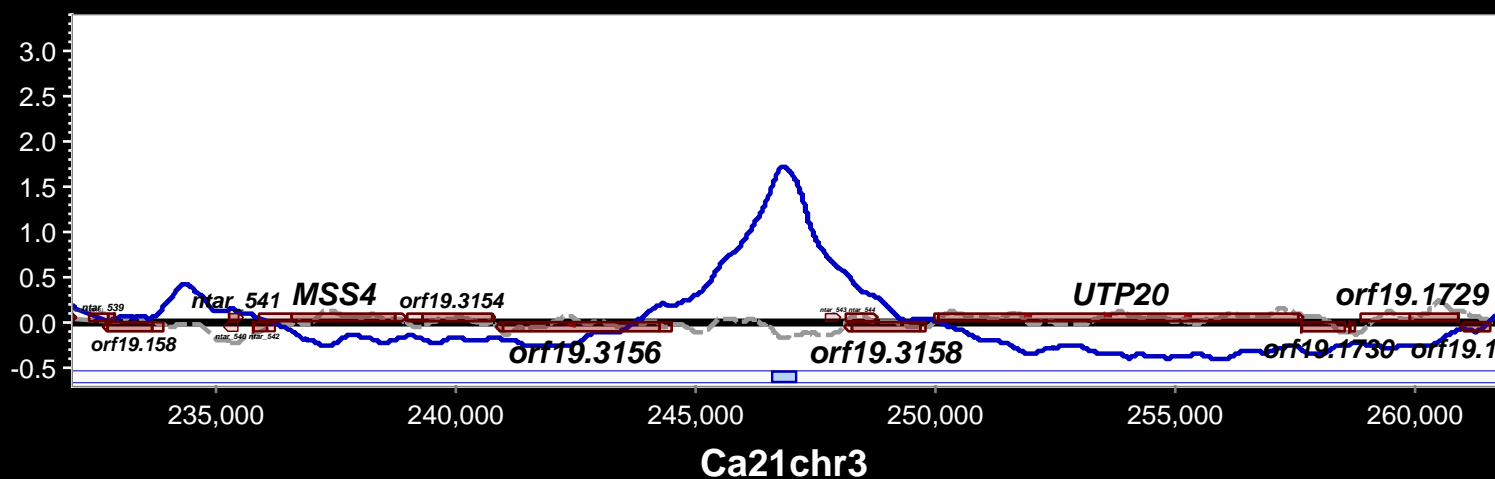

[1.721] Ca21chr7:614169-643852 [+] [ENA21, PMT1, orf19.5169, LIP9, TAF19]

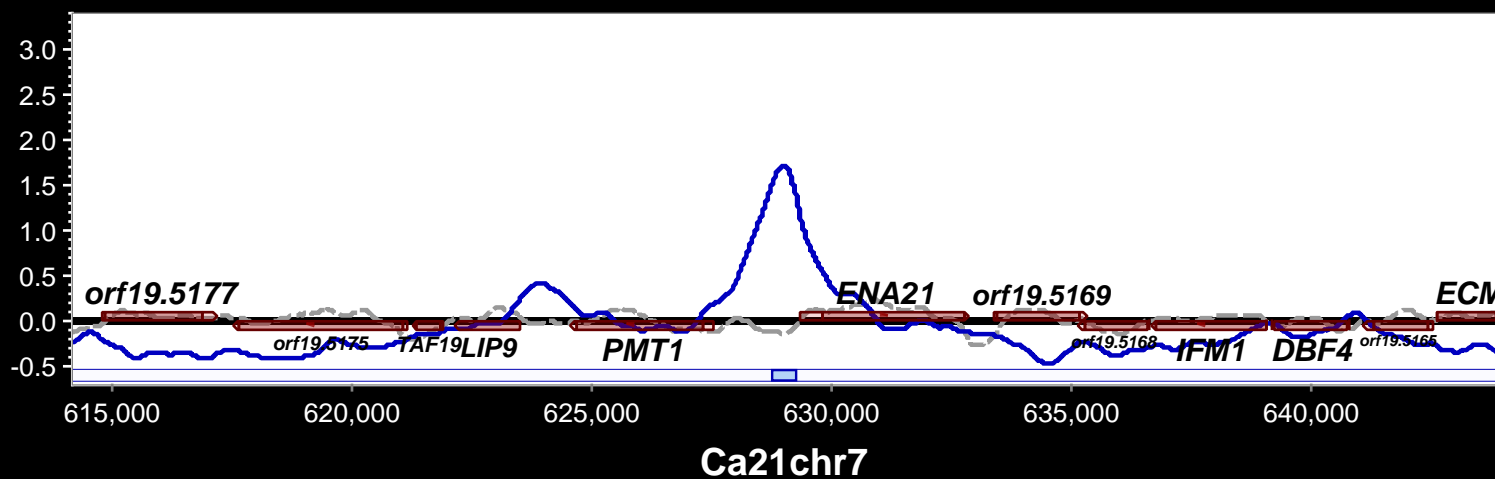

[1.712] Ca21chr1:873713-903396 [+] [ACS2, orf19.1063, SSA2, orf19.1062, orf19.1066]

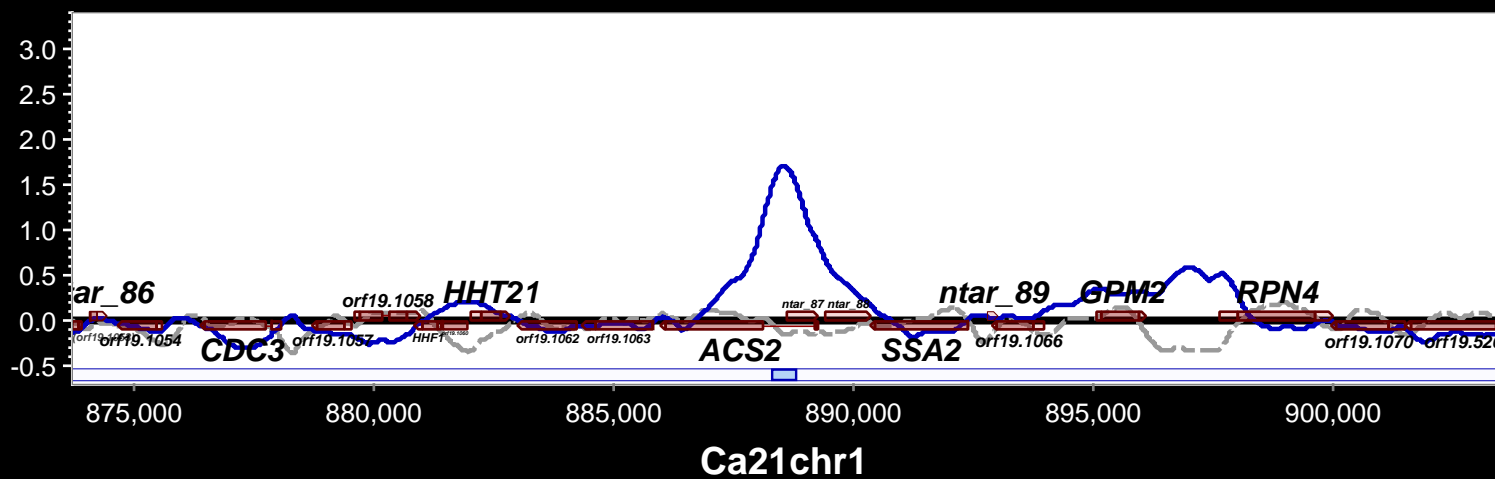

[1.712] Ca21chrR:292158-321841 [+] [orf19.3226, FTH2, CWH43, orf19.3223.1, ATP3]

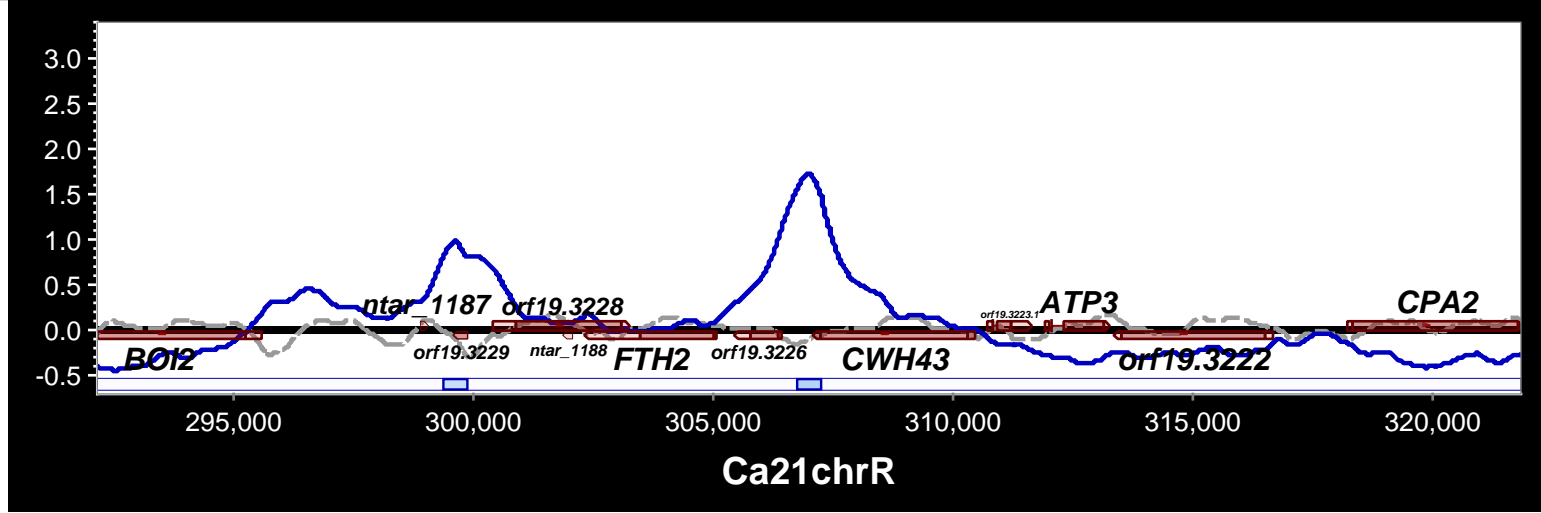

[1.709] Ca21chr4:848009-877692 [+] [orf19.5308, JEN2, orf19.5311, RHD3, orf19.5304]

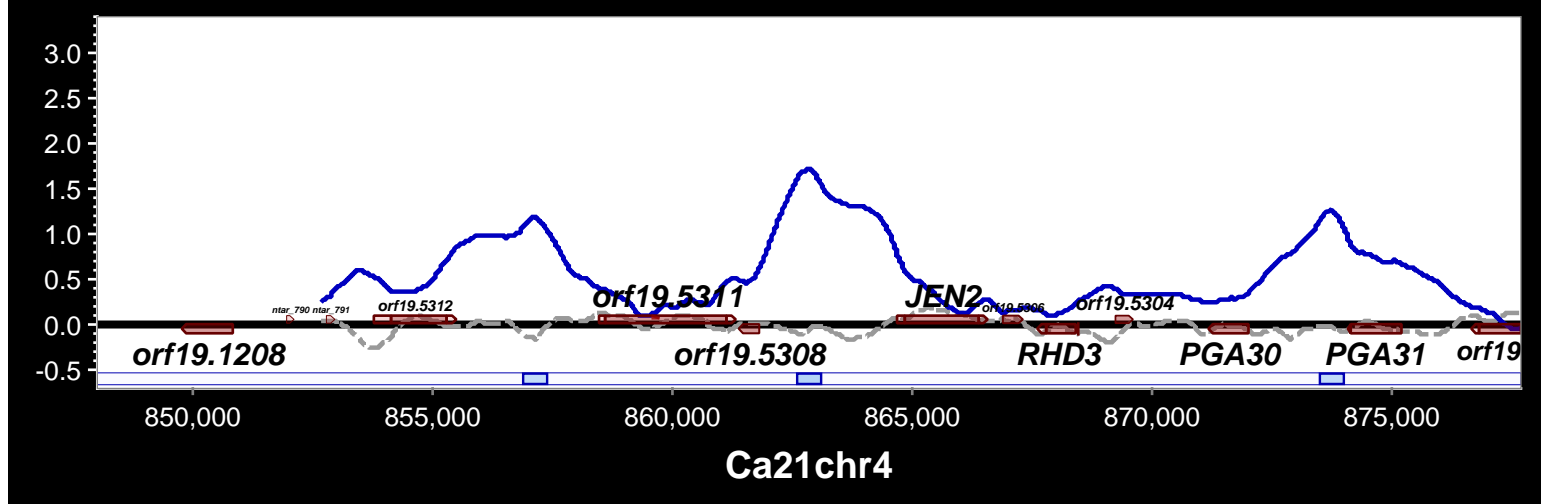

[1.709] Ca21chr5:101993-131676 [+] [orf19.934, orf19.933, AGA1, orf19.932, orf19.936]

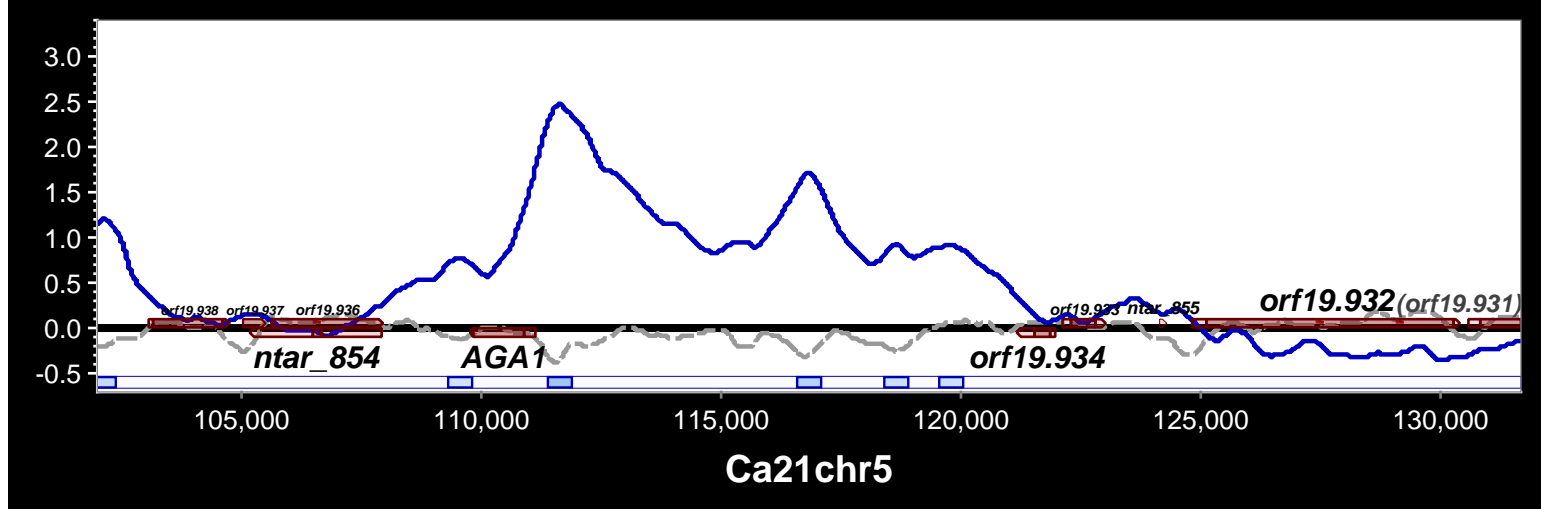

[1.708] Ca21chr2:1793541-1823224 [+] [orf19.217, BUD20, orf19.216.1, orf19.216, PIR1]

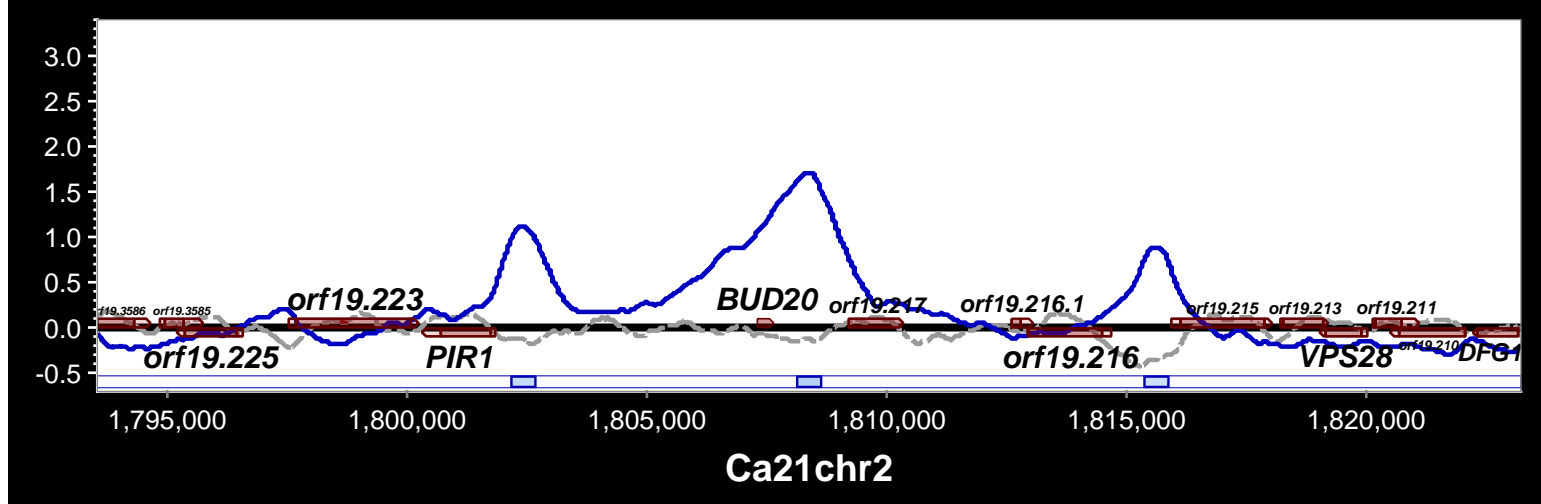

[1.704] Ca21chr2:508982-538665 [+] [ZRT2, orf19.1584, FGR22, HGT20, orf19.1582]

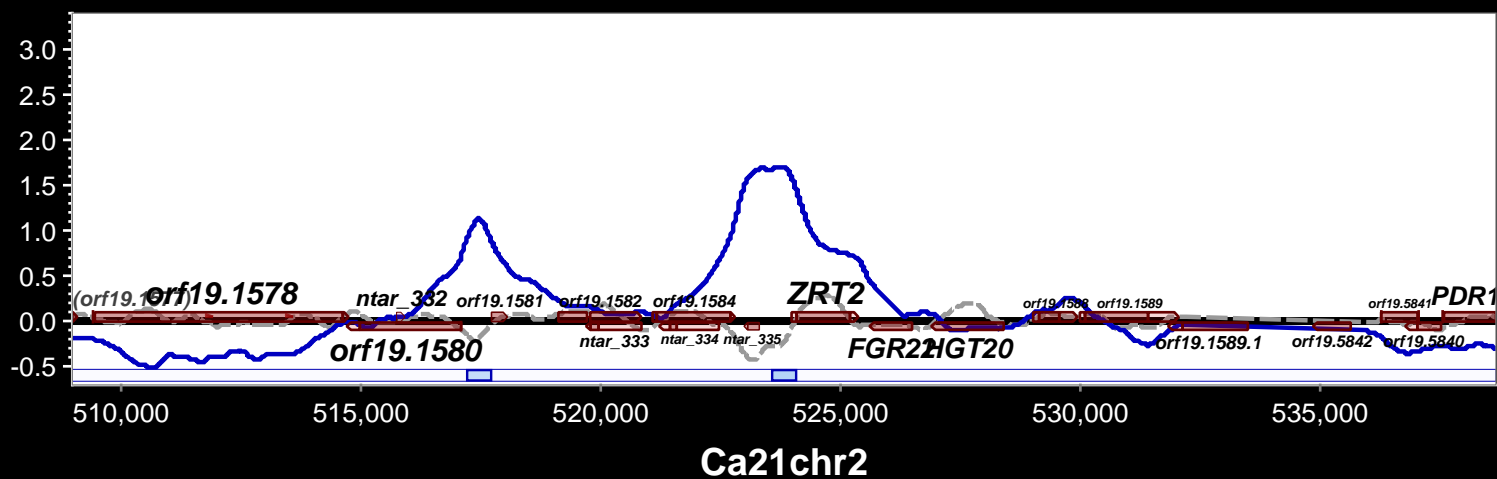

[1.701] Ca21chr1:3058648-3088331 [+] [SIM1, orf19.5033, orf19.5034, SSK1, orf19.5035]

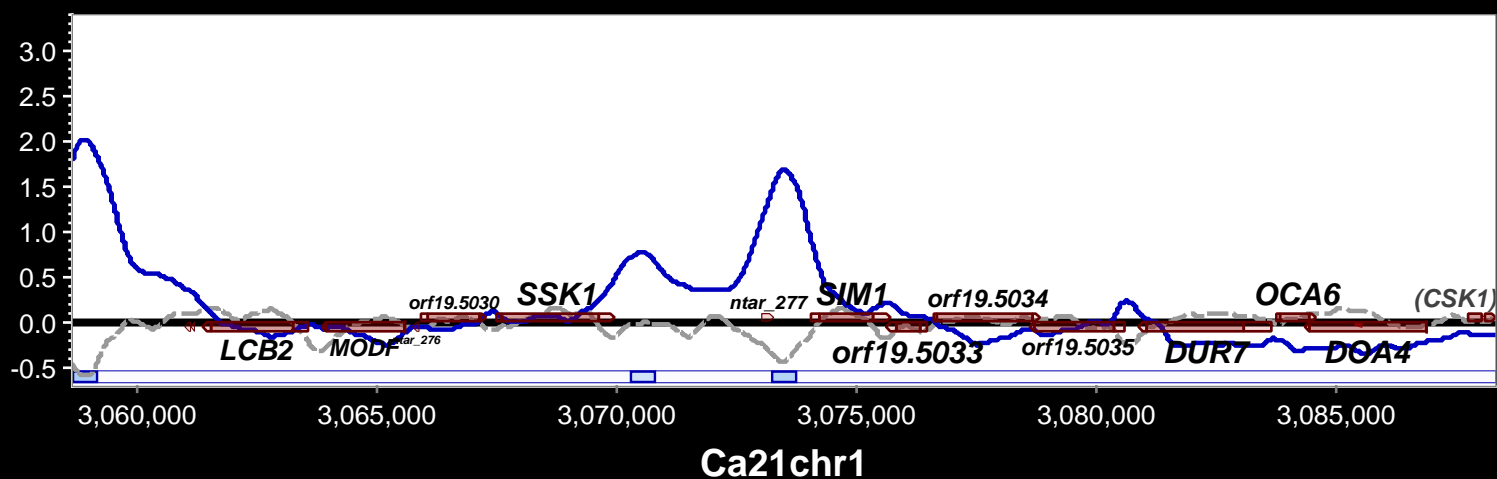

[1.69] Ca21chr1:557643-587326 [+] [orf19.2962, orf19.2963, orf19.2961, orf19.2964, FRS2]

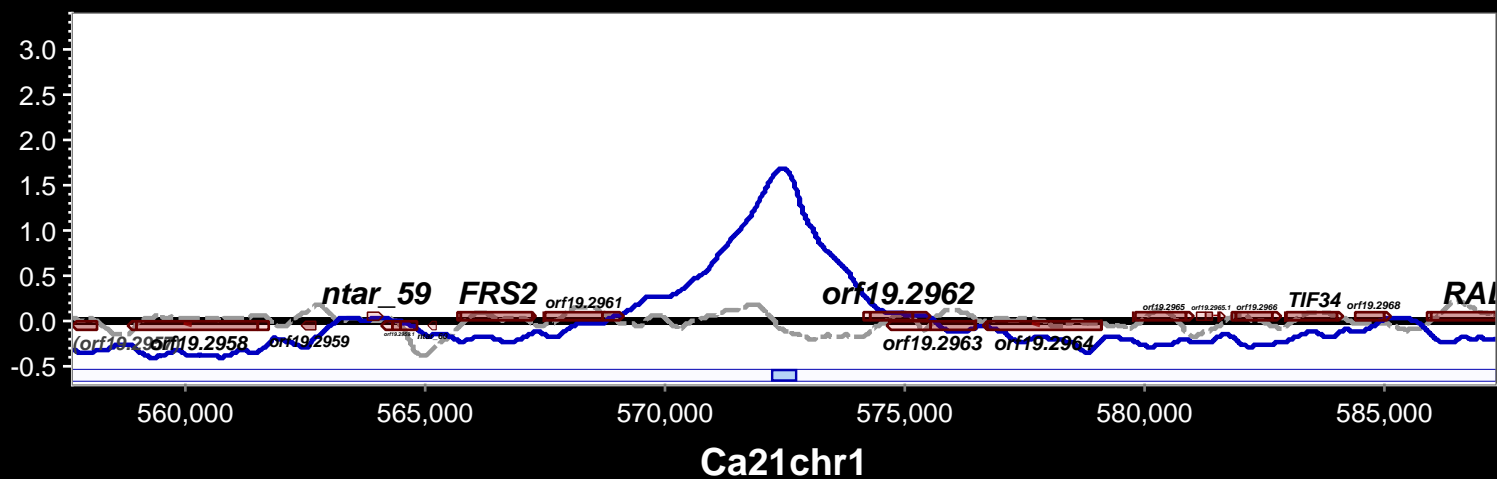

[1.686] Ca21chr1:1593786-1623469 [+] [PHO100, PEX3, orf19.4423, SKP1, orf19.4428]

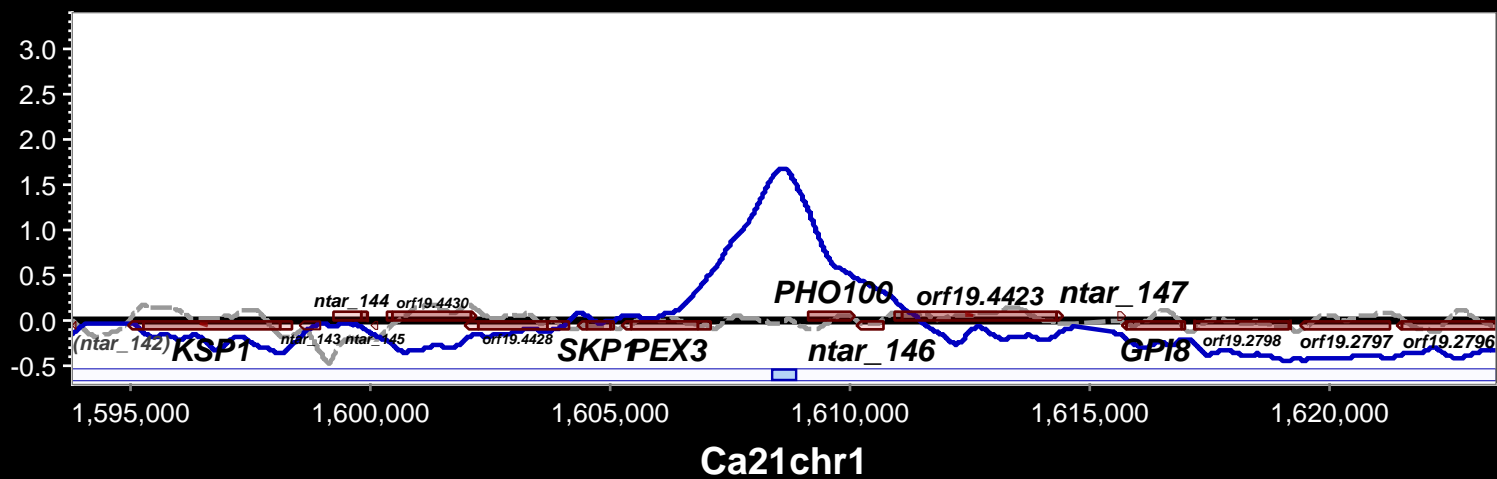



[1.673] Ca21chr2:1633019-1662702 [+] [ARA1, MAF1, RAD57, PHM7, orf19.2175]

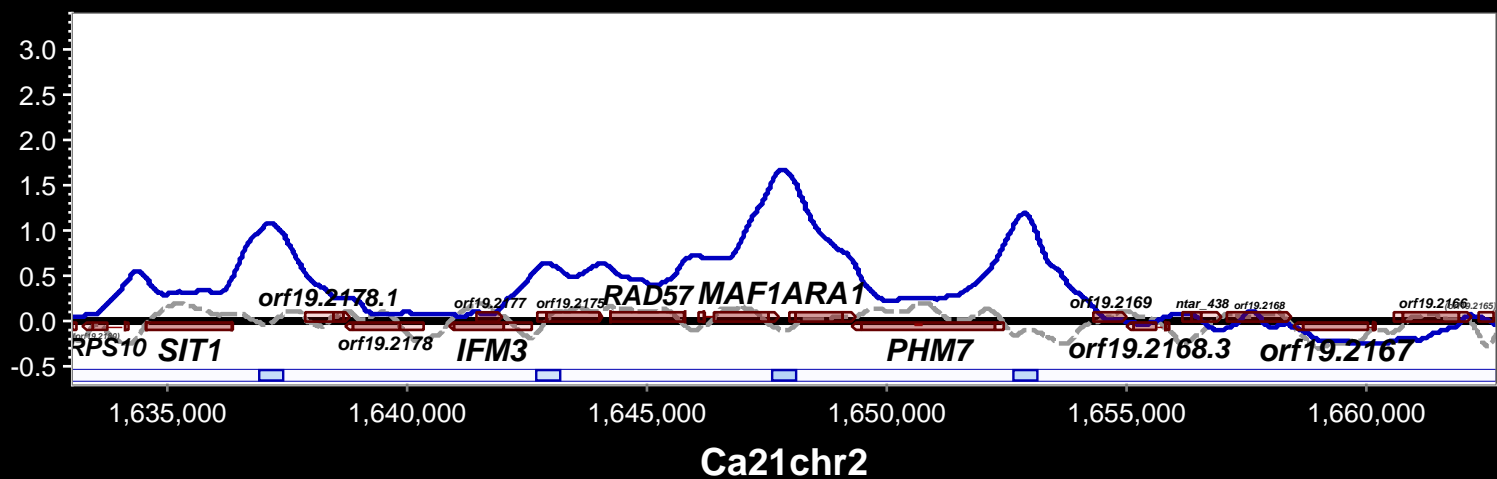

[1.671] Ca21chr5:853120-882803 [+] [orf19.3216, orf19.3218, orf19.3215, orf19.3214, orf19.3219]

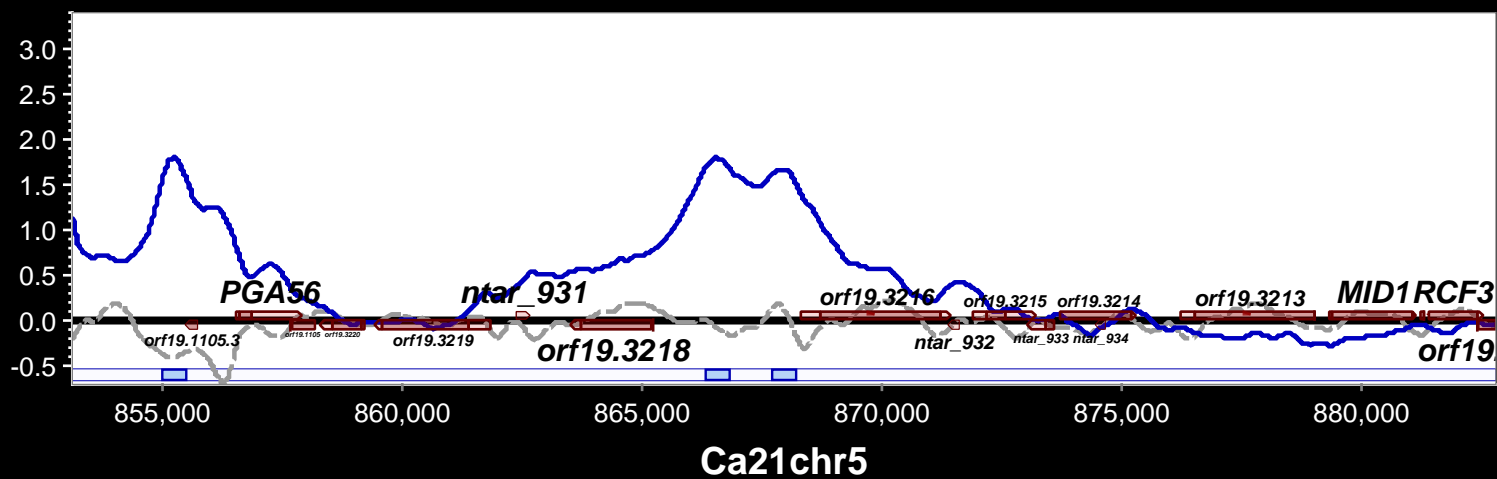

[1.669] Ca21chr5:837875-867558 [+] [orf19.1106, orf19.1105.3, PGA56, orf19.1107, orf19.1105]

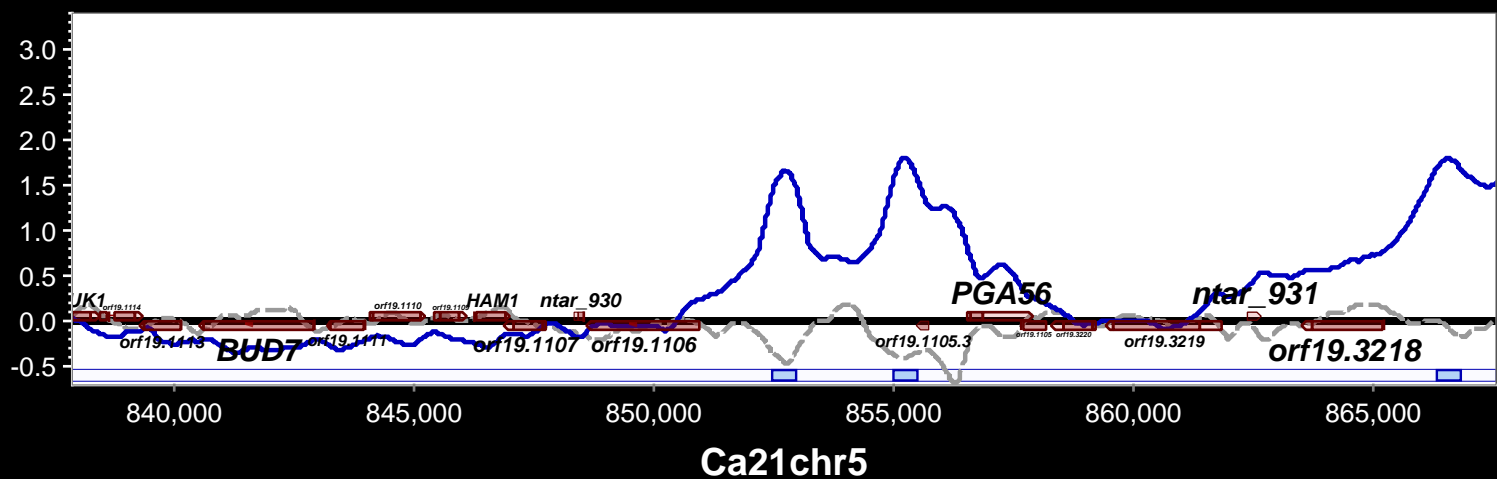

[1.668] Ca21chr2:1103059-1132742 [+] [orf19.3574, CDC19, COQ5, orf19.3577.1, orf19.3578]

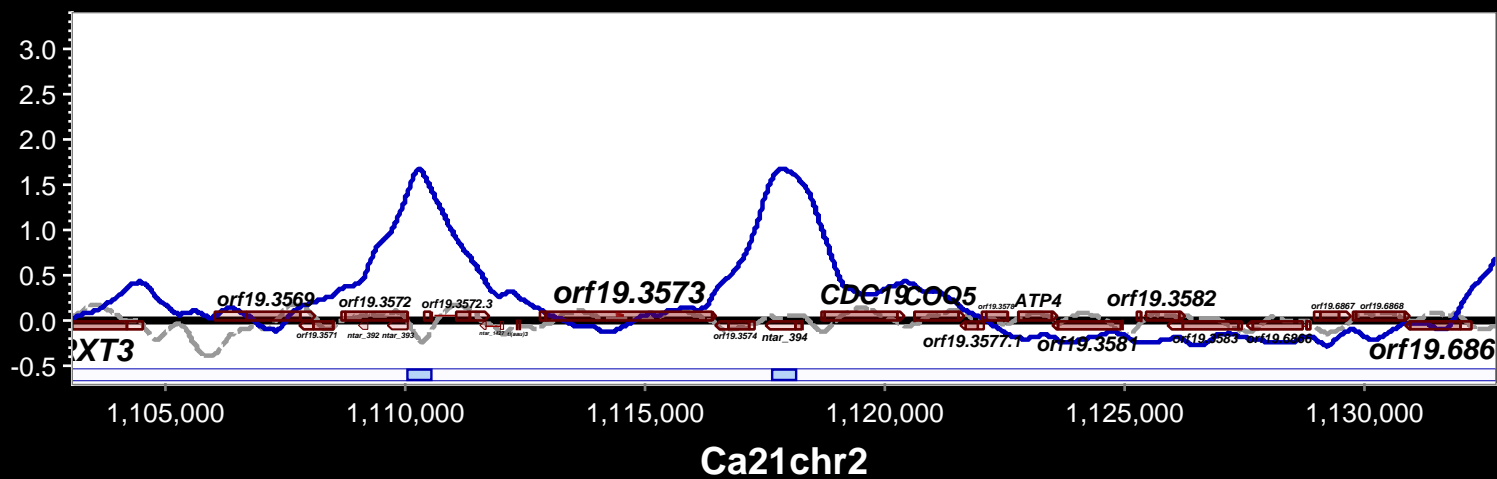

[1.667] Ca21chr6:750664-780347 [+] [orf19.5728, FGR17, orf19.5727, orf19.5725, orf19.5730]

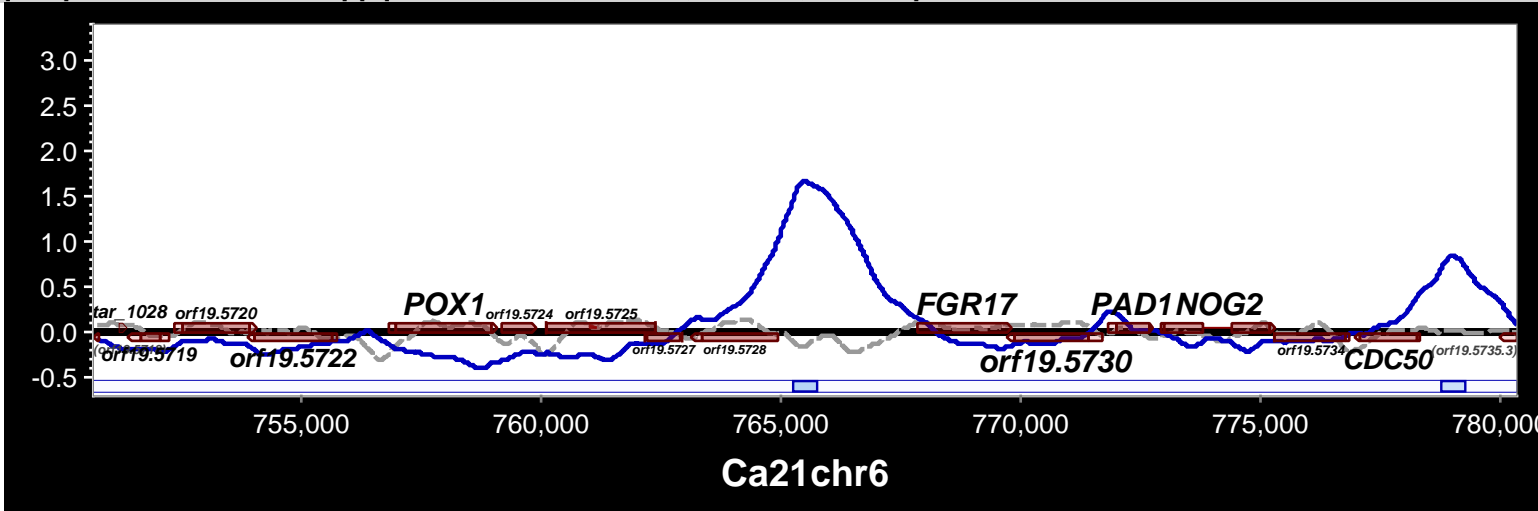

[1.666] Ca21chrR:1525025-1554708 [+] [orf19.1814, orf19.1815, ALS3, FLC2, orf19.8]

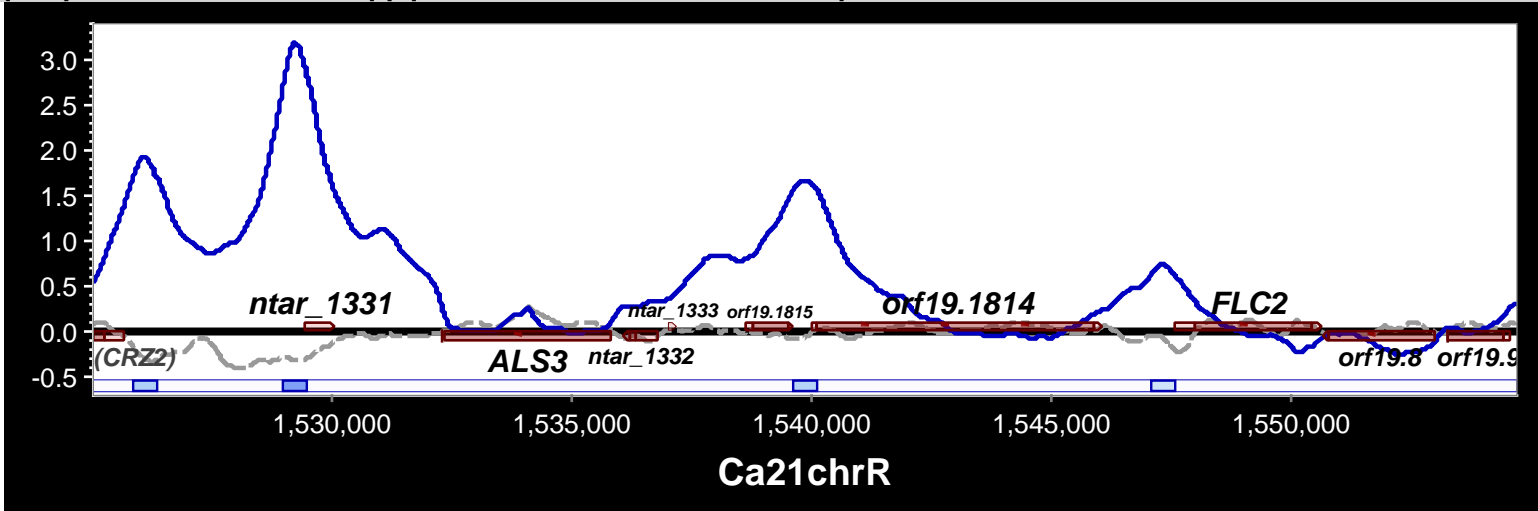

[1.664] Ca21chrR:862395-892078 [+] [orf19.467, HST7, IFF9, orf19.470, orf19.4358]

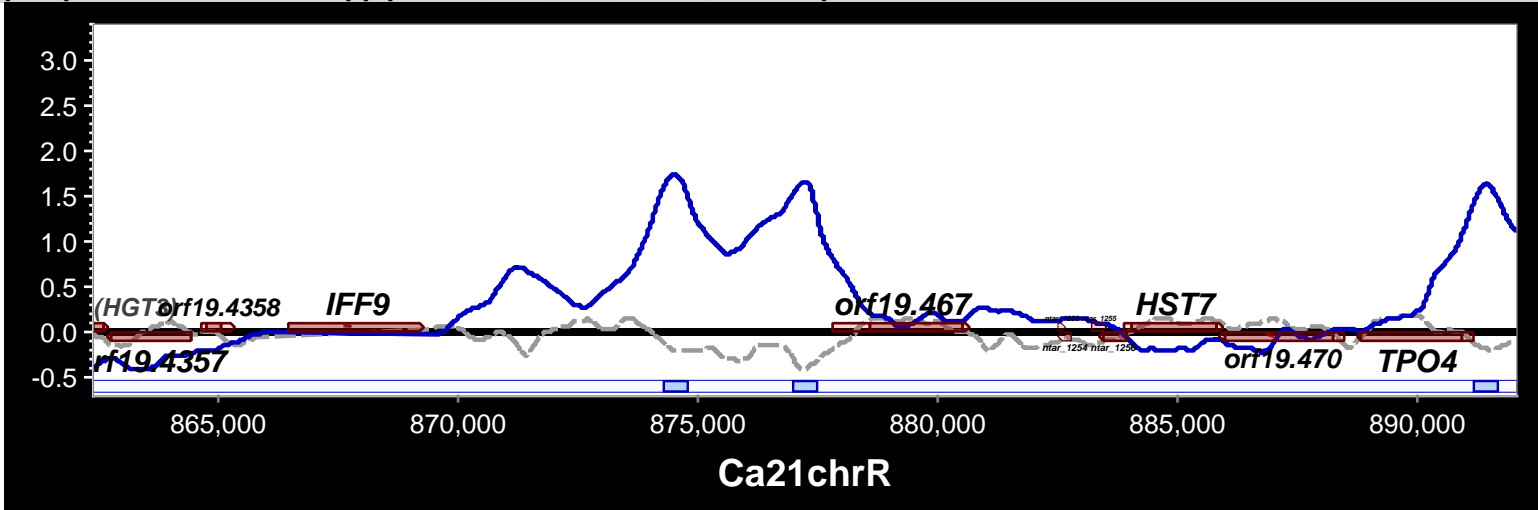

[1.659] Ca21chr4:554847-584530 [+] [orf19.2724, orf19.2725, HIT1, CGR1, orf19.2726]

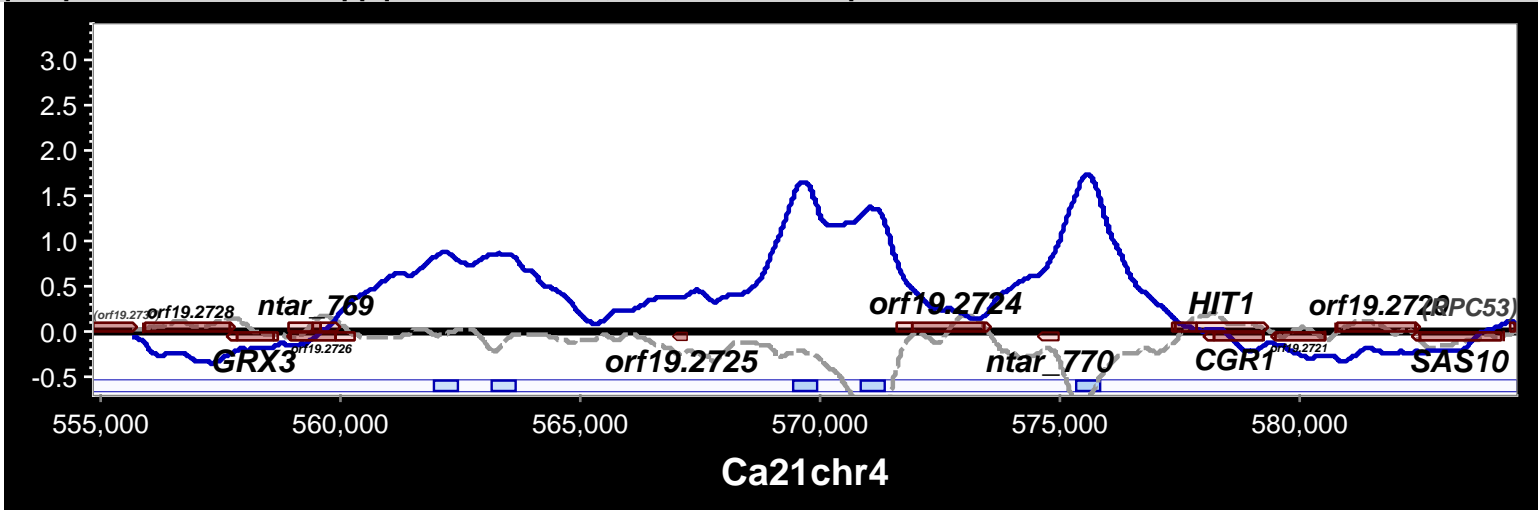

[1.658] Ca21chr2:1095454-1125137 [+] [orf19.3572.3, orf19.3572, orf19.3571, tl(AAU)3, orf19.3573]

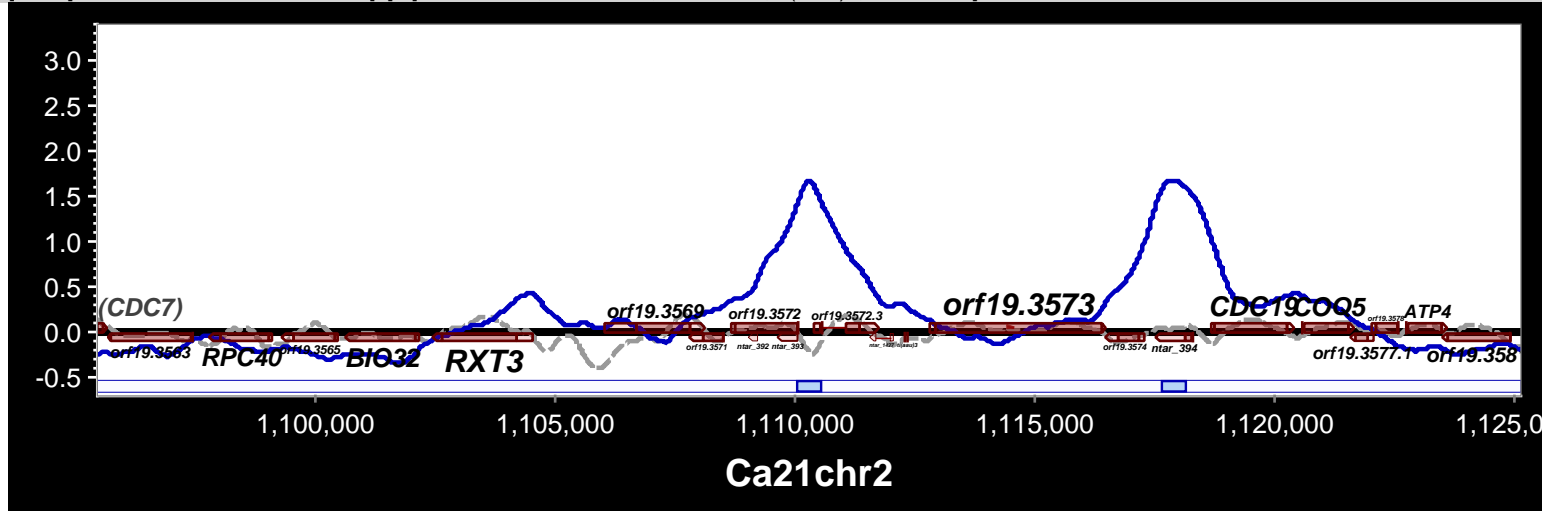

[1.657] Ca21chr6:350981-380664 [+] [FGR37, SUR7, ATG15, orf19.3411, SEC12]

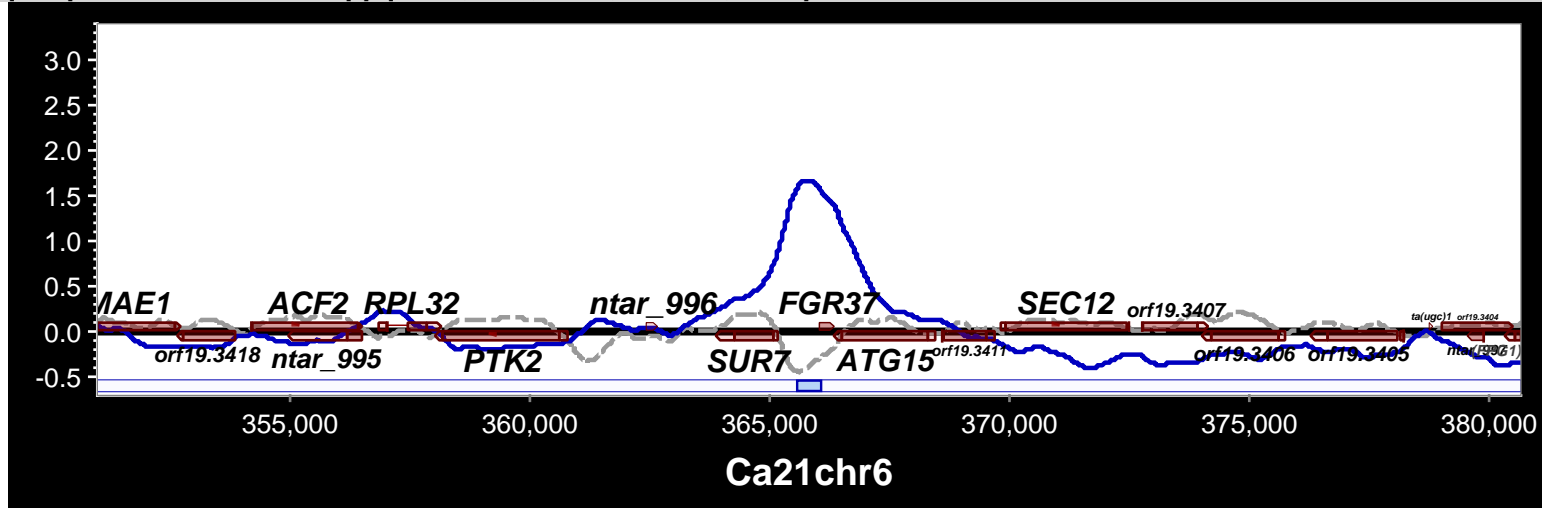

[1.65] Ca21chrR:654613-684296 [+] [AQY1, orf19.2850, orf19.2848, orf19.2847.1, orf19.2847]

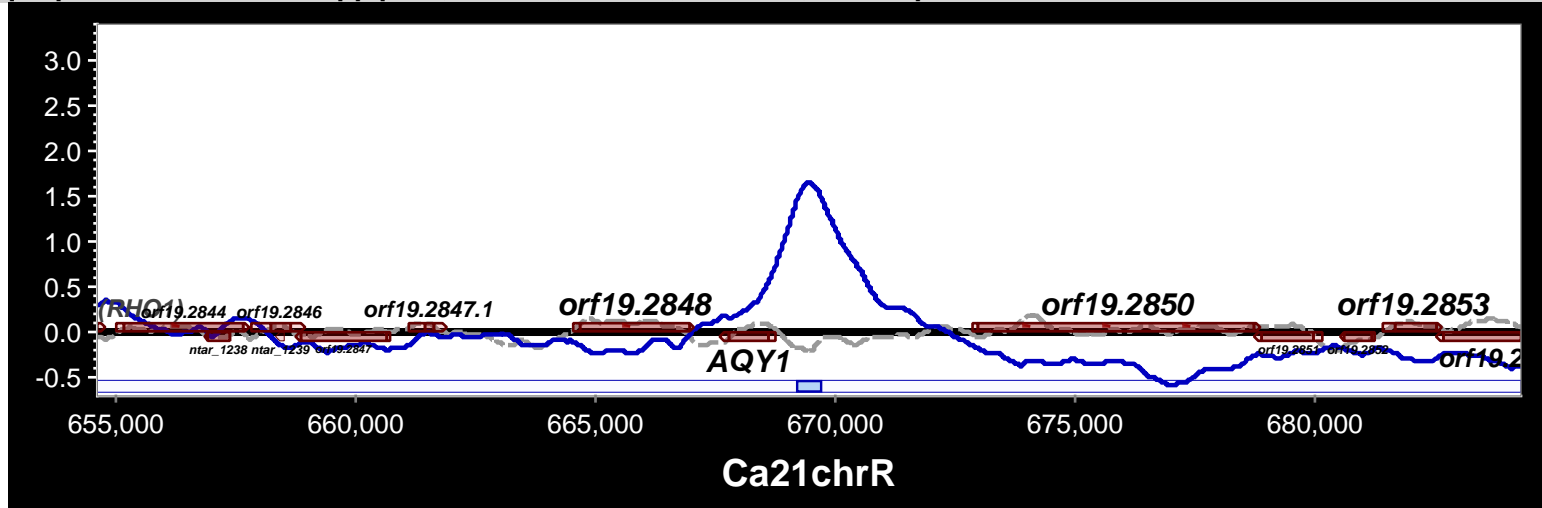

[1.649] Ca21chr4:1011312-1040995 [+] [FAV1, PMT6, MNN2, orf19.3799, orf19.3804]

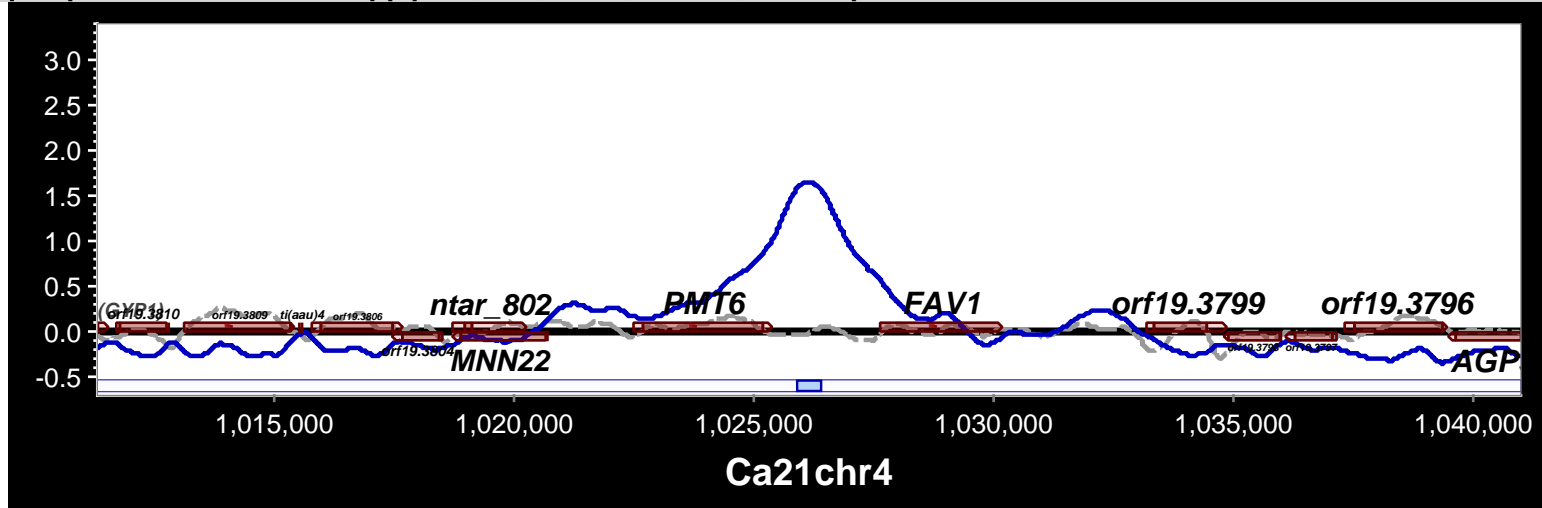

[1.646] Ca21chr1:287134-316817 [+] [orf19.3338, orf19.3337, SOD2, orf19.3341, orf19.3342]

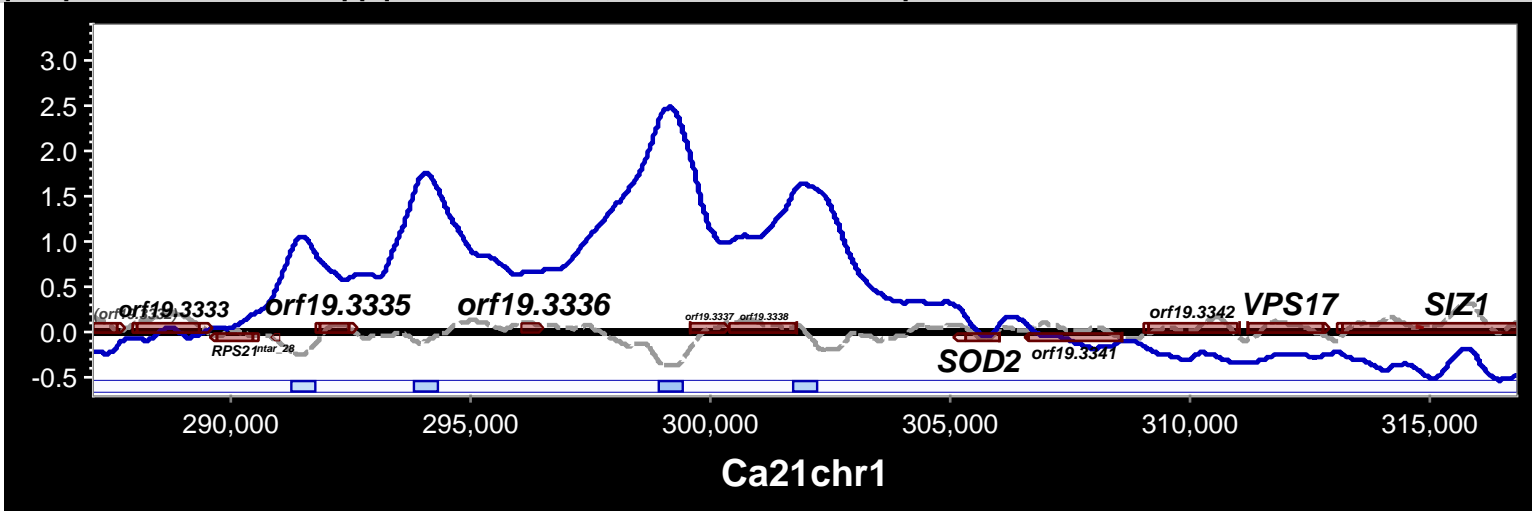

[1.644] Ca21chr1:1320724-1350407 [+] [orf19.177, orf19.6280, orf19.6277, orf19.1821]

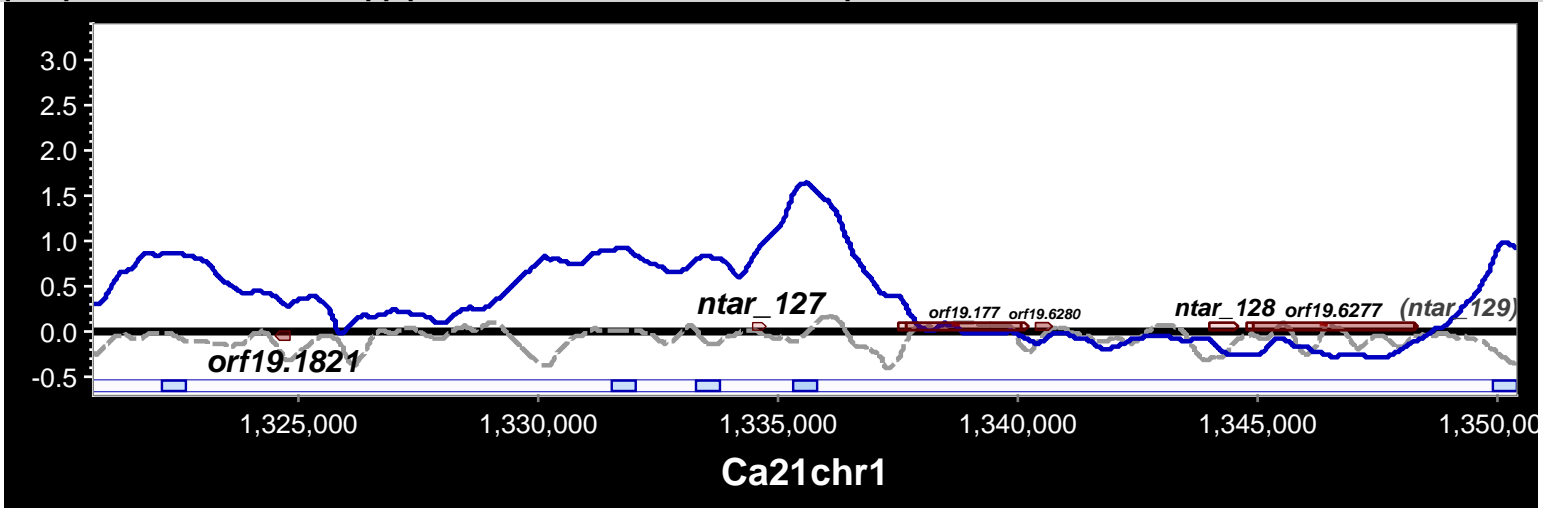

[1.642] Ca21chrR:484536-514219 [+] [orf19.3748, IFC3, IFC1, orf19.3744, orf19.3751]

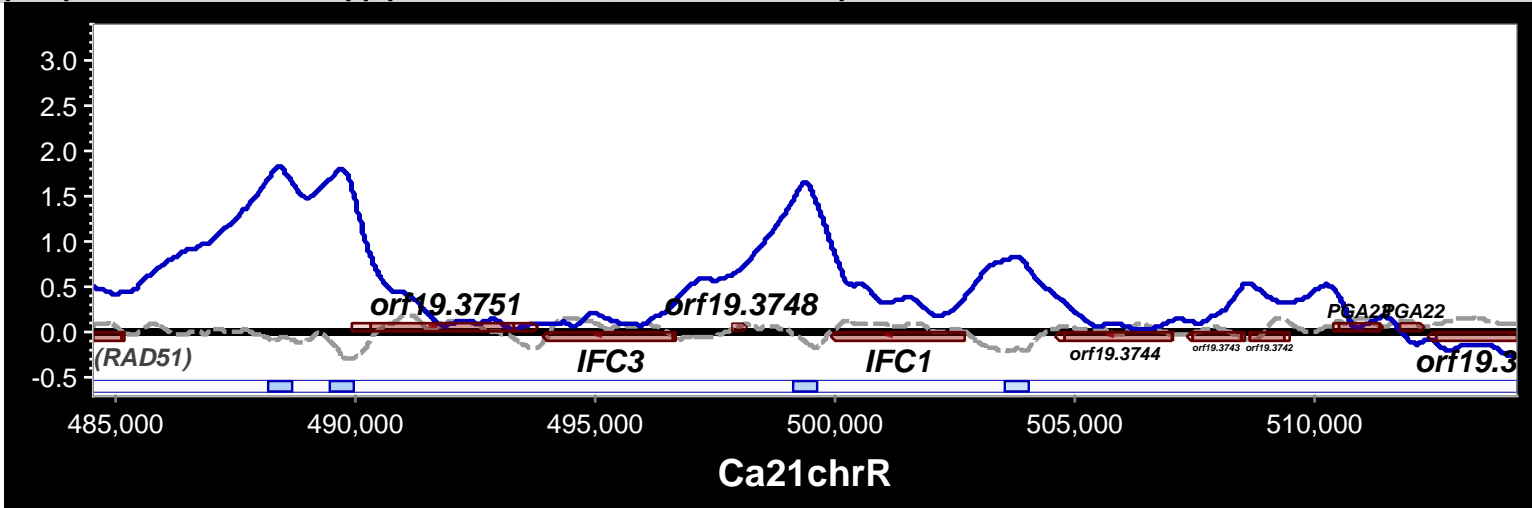

[1.641] Ca21chr3:1131054-1160737 [+] [CDR1, DYN1, SAP3, RPL8B, orf19.6003]

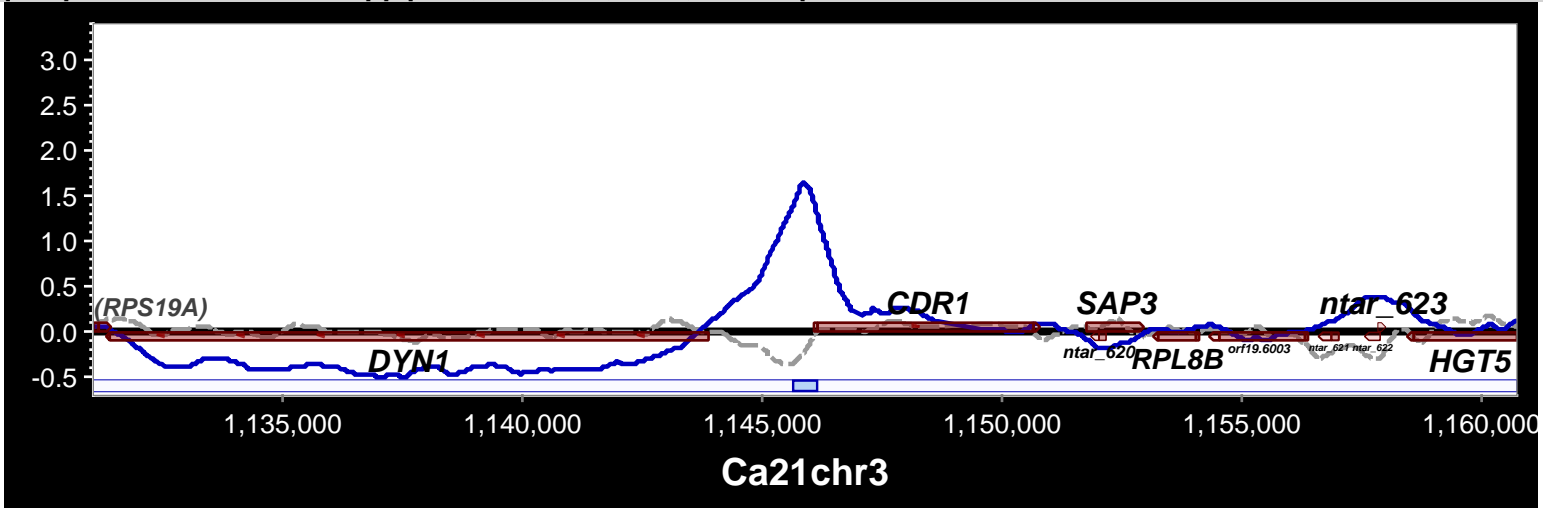

[1.64] Ca21chrR:1873188-1902871 [+] [RDN5, RDN18, tg(GCC)6, RDN58, RDN25]

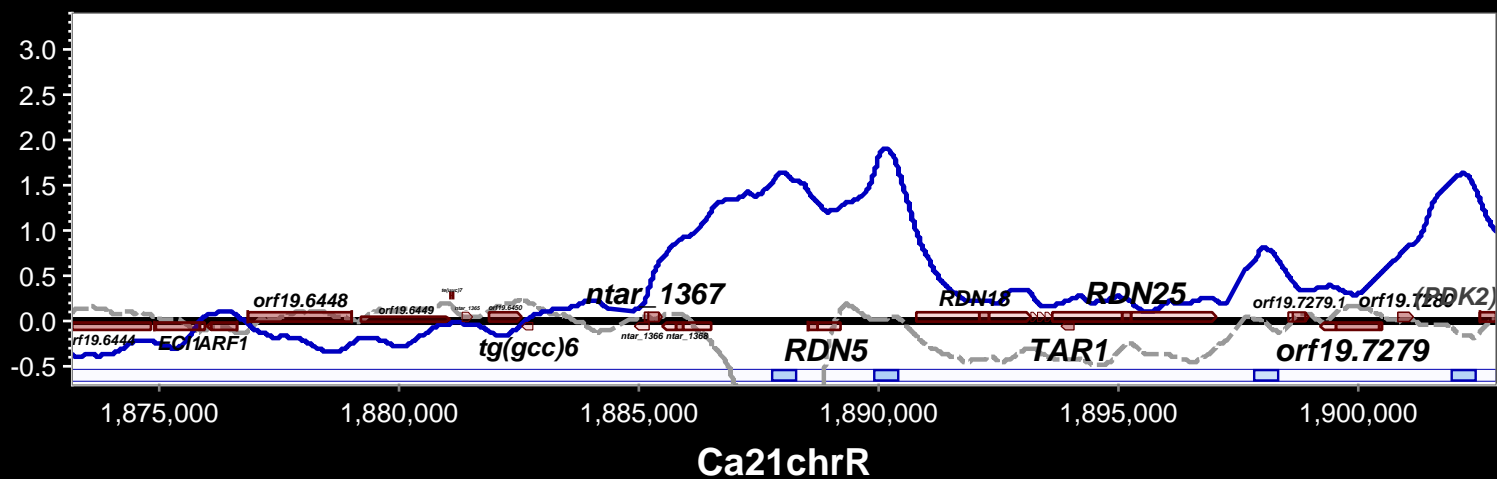

[1.639] Ca21chr1:1558727-1588410 [+] [tl(AAG)2, RME1, orf19.4437, CEN1, orf19.4436]

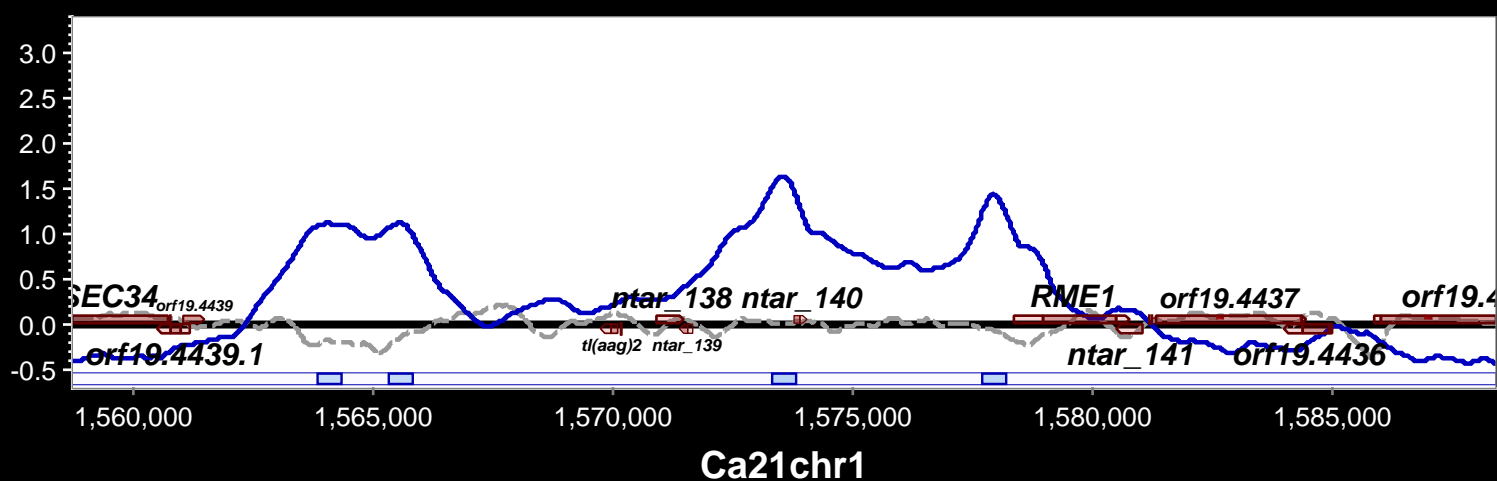

[1.637] Ca21chr4:1152088-1181771 [+] [orf19.1793, orf19.1794, PUF3, orf19.1792, orf19.1791]

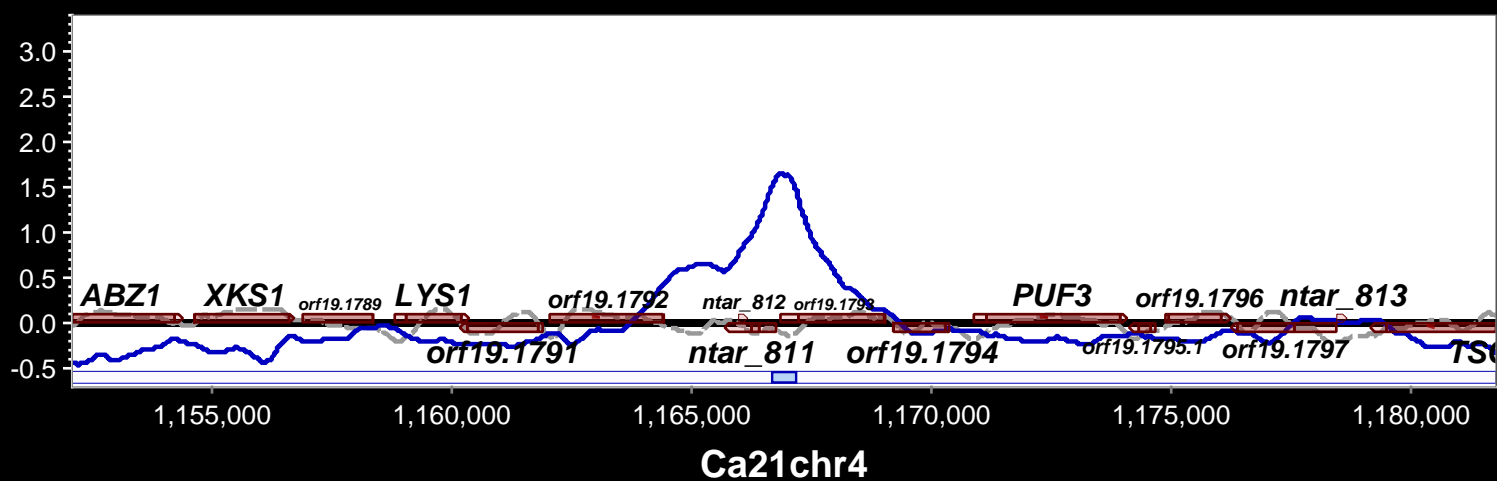

[1.635] Ca21chrR:876588-906271 [+] [TPO4, orf19.474, orf19.470, orf19.475, orf19.477]

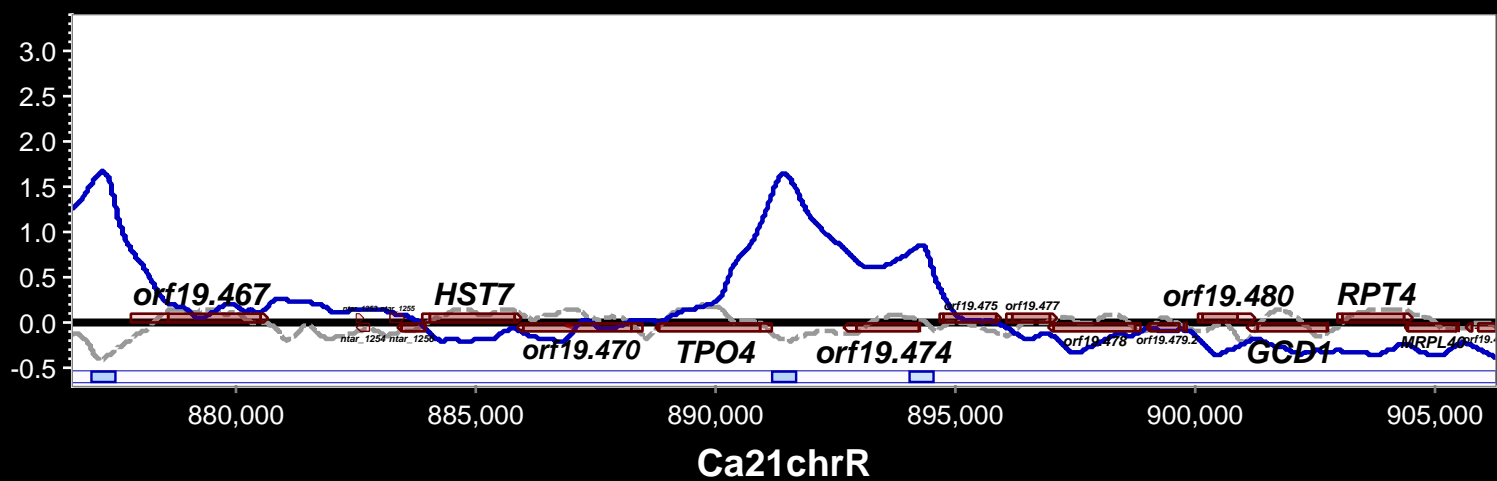

[1.629] Ca21chrR:1887357-1917040 [+] [PDK2, orf19.7280, orf19.7279, PEX13, orf19.7279.1]

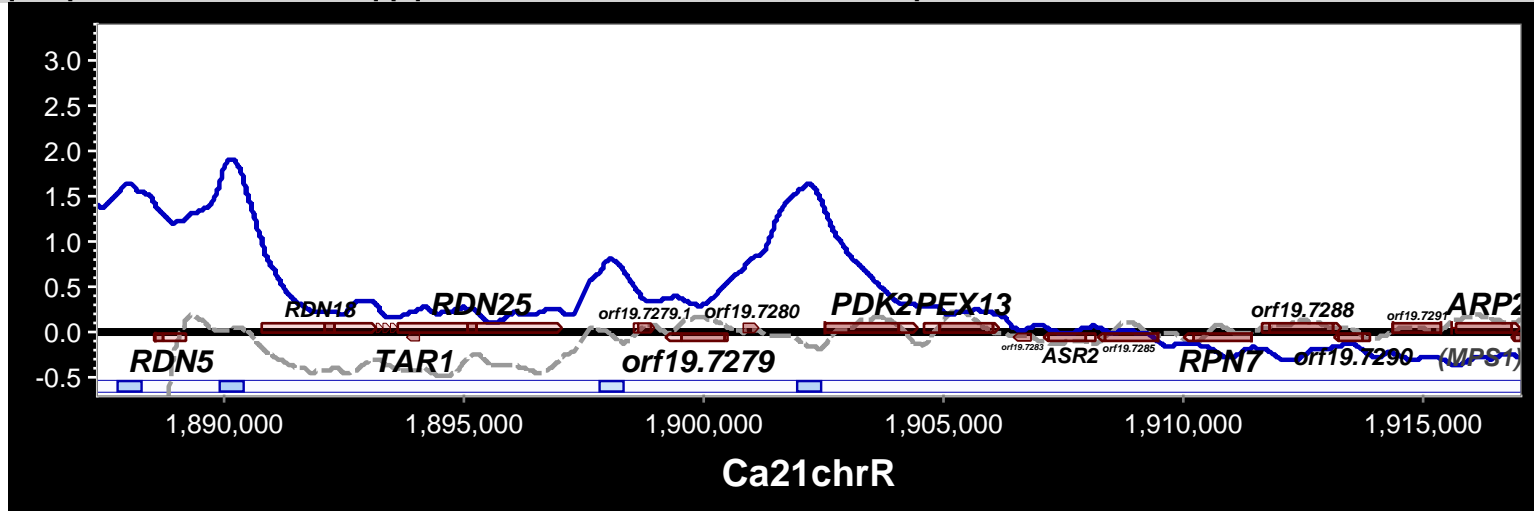

[1.627] Ca21chrR:1623523-1653206 [+] [orf19.2625, RGD3, orf19.2624, orf19.729, ECM22]

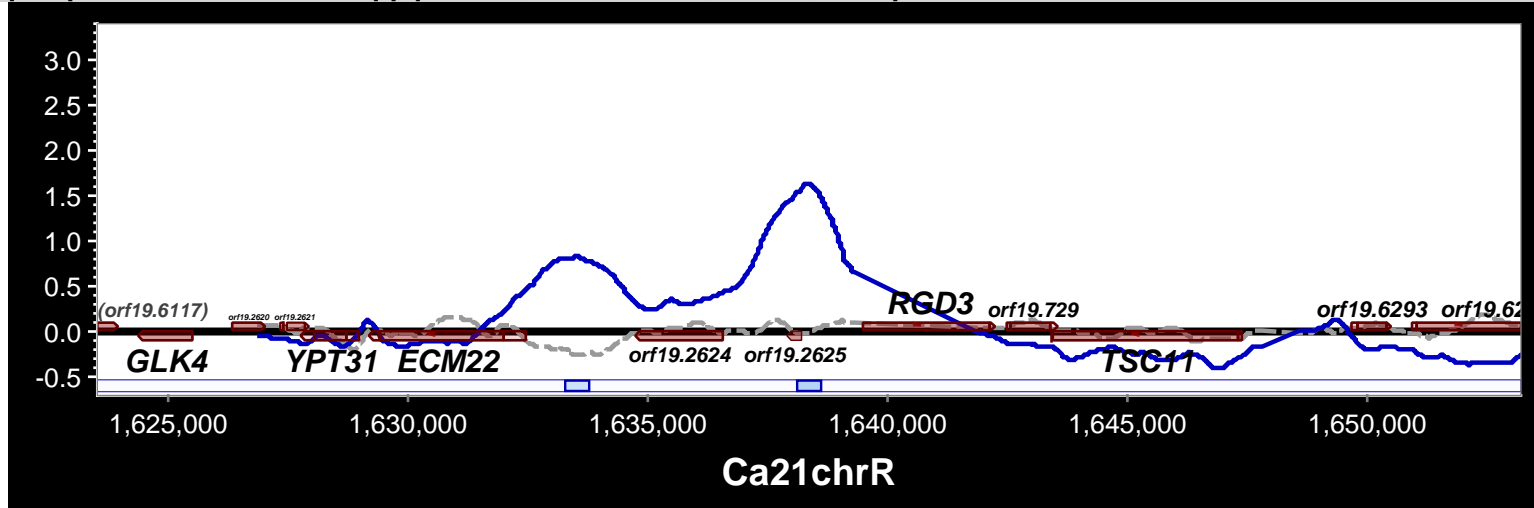

[1.626] Ca21chrR:583241-612924 [+] [RFG1, orf19.2822, orf19.2825, orf19.2821, orf19.2820]

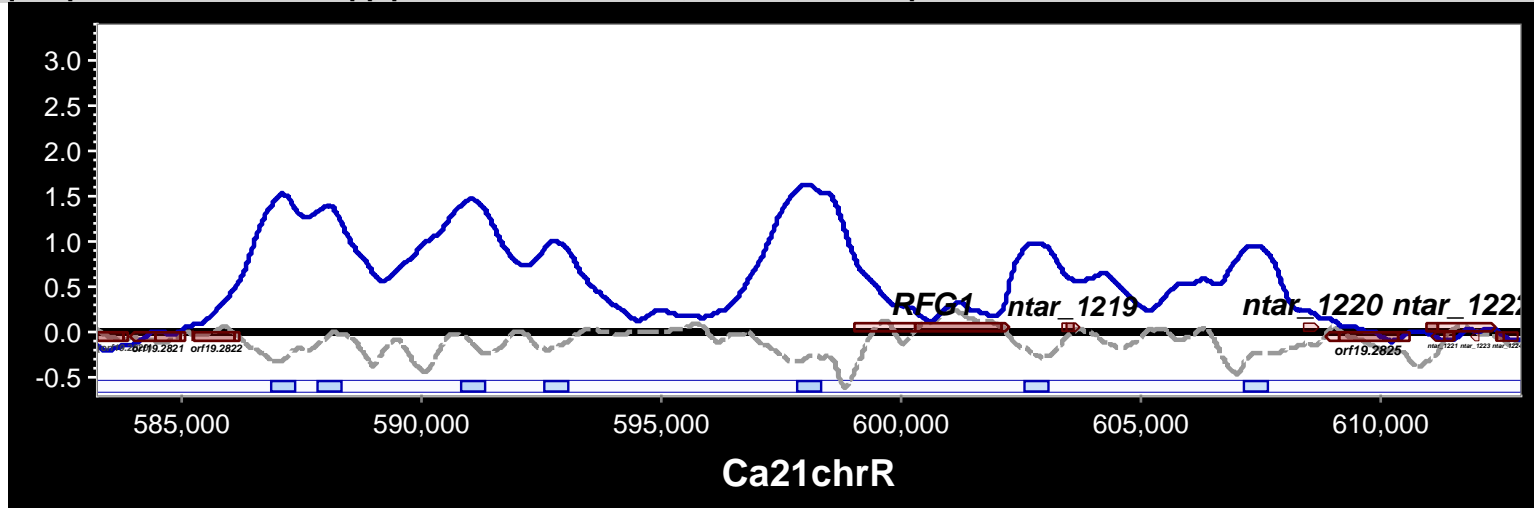

[1.624] Ca21chr5:878035-907718 [+] [orf19.1287, FGR42, orf19.1286, orf19.1285, orf19.3210]

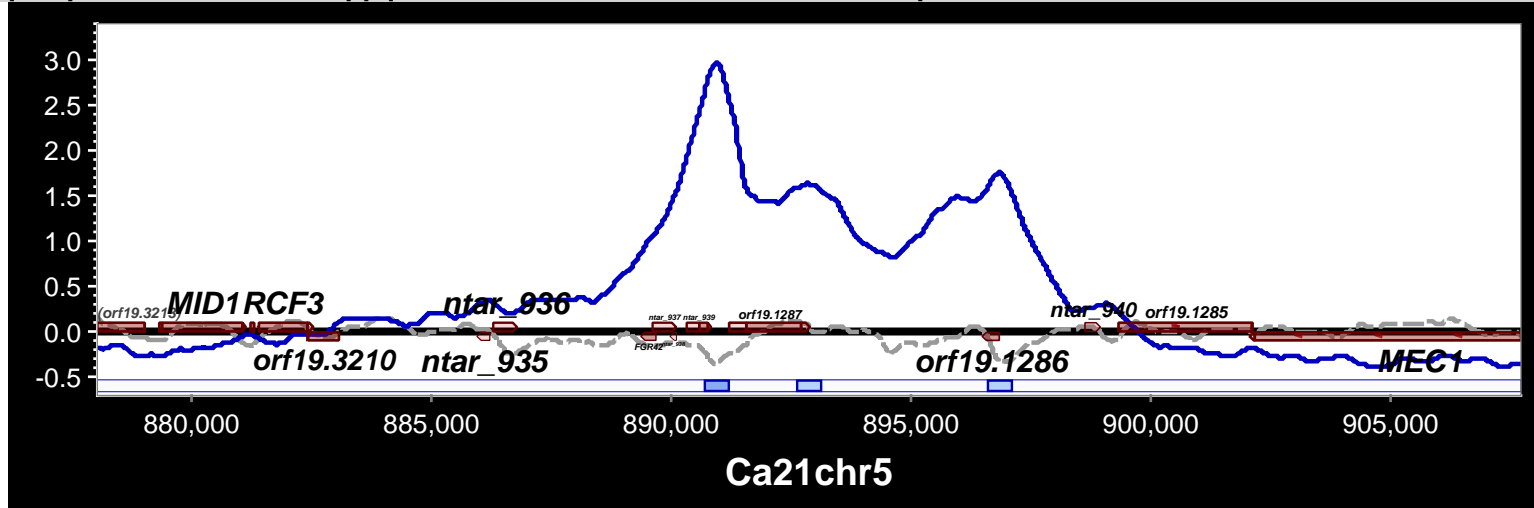

[1.624] Ca21chrR:56570-86253 [+] [orf19.7504, CDA2, orf19.7506, orf19.7507, orf19.7502]

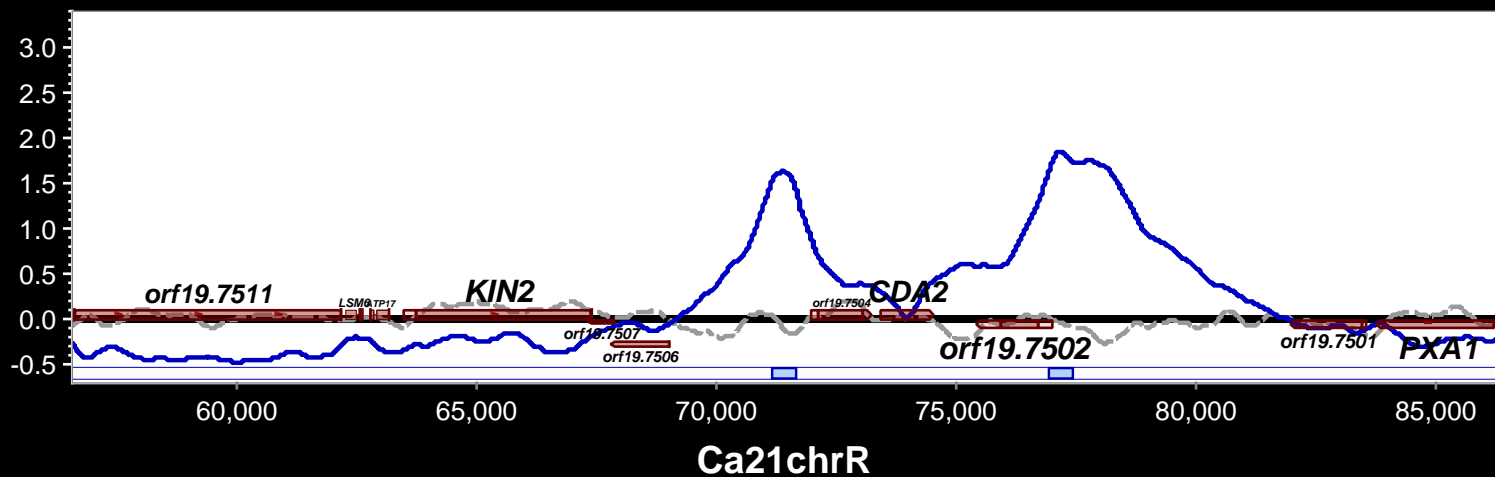

[1.623] Ca21chr1:1236047-1265730 [+] [PGA45, orf19.2452, orf19.2449, PHO87, orf19.2447]

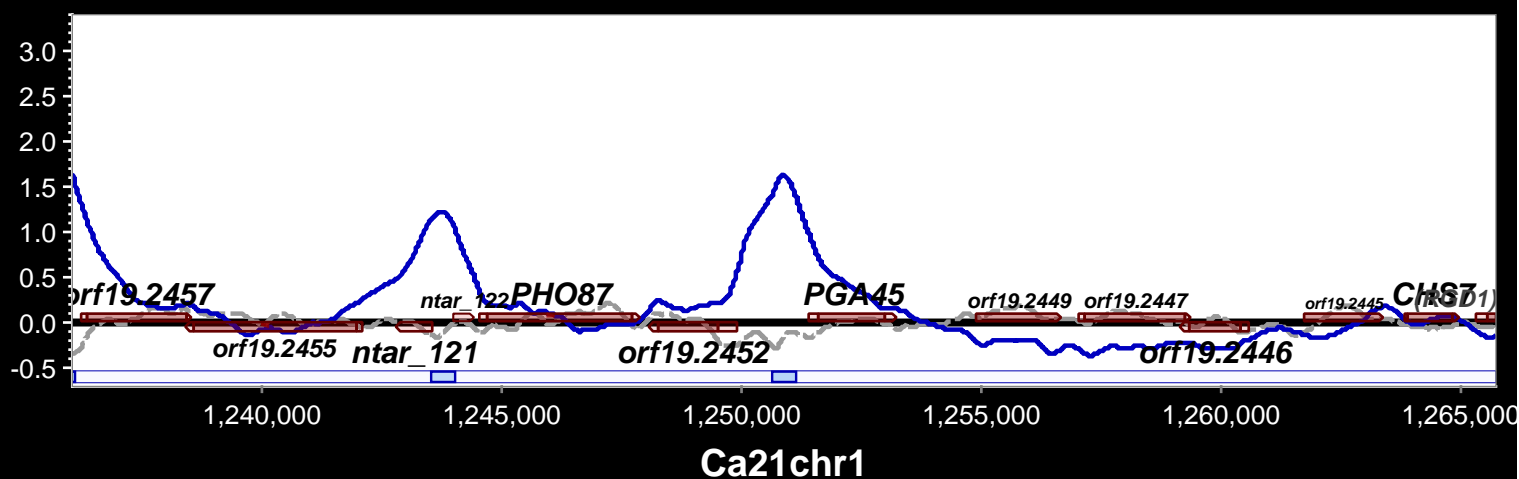

[1.621] Ca21chr5:1041935-1071618 [+] [orf19.3970, orf19.3971, orf19.3969, orf19.3972, orf19.3973]

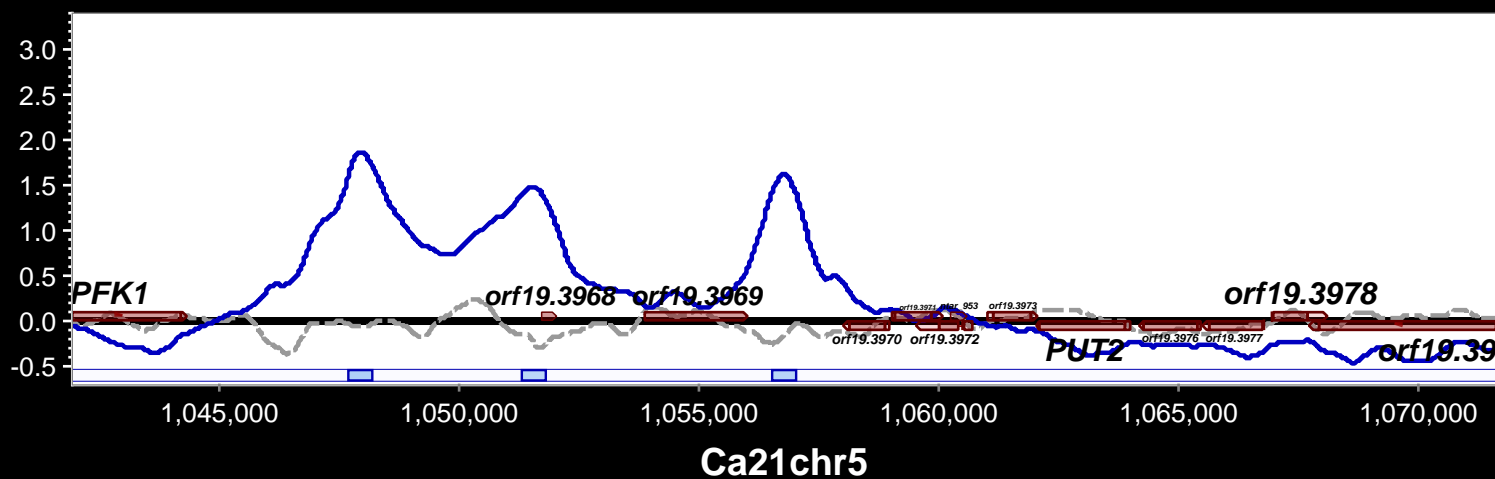

[1.62] Ca21chr1:2543165-2572848 [+] [orf19.1152, orf19.1150.1, GAD1, orf19.1150, EGD1]

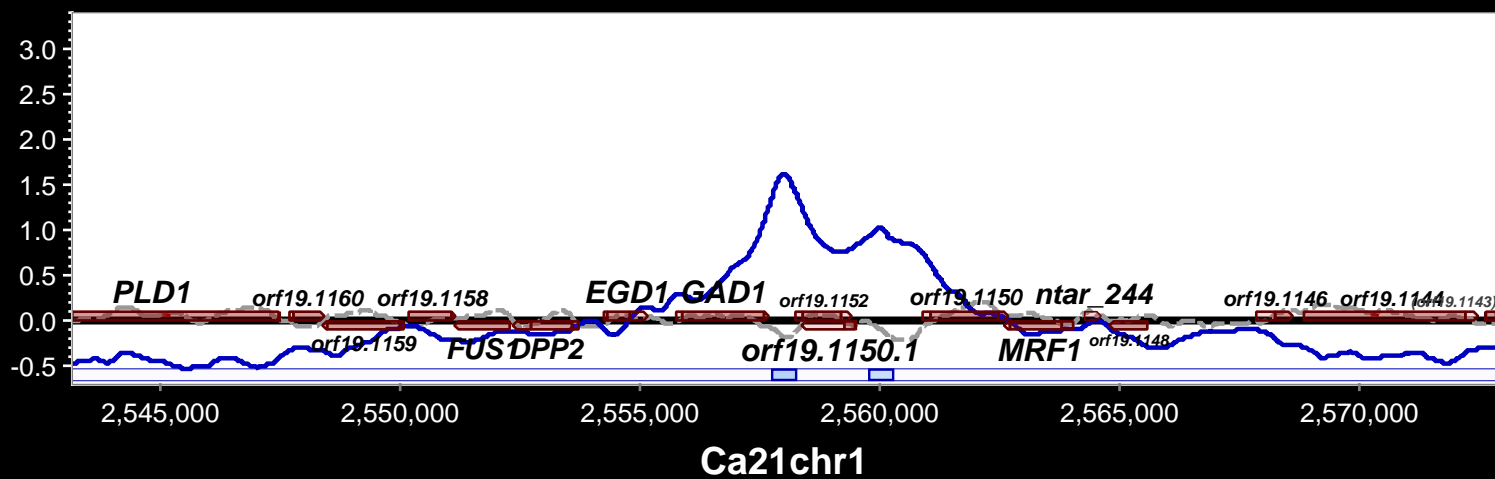

[1.62] Ca21chrR:1801103-1830786 [+] [orf19.6408, orf19.6407, orf19.6406, tl(AAU)5, orf19.6411]

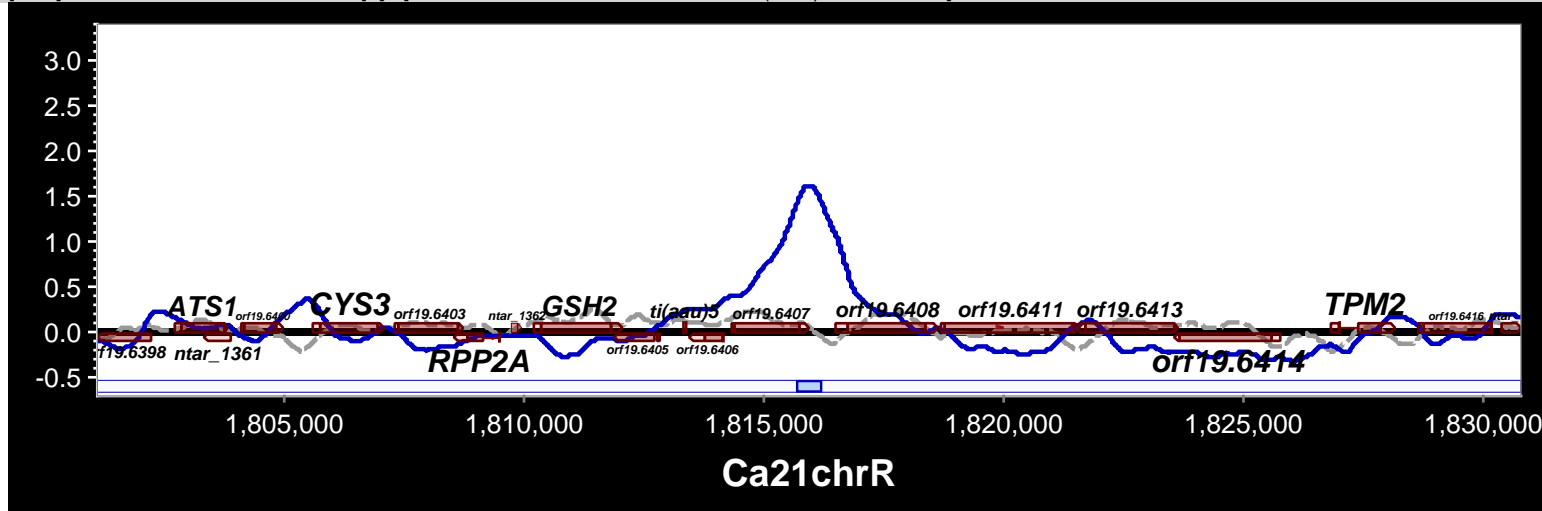

[1.613] Ca21chr6:416030-445713 [+] [orf19.3501, orf19.3499, RPL23A, orf19.3503, orf19.3498]

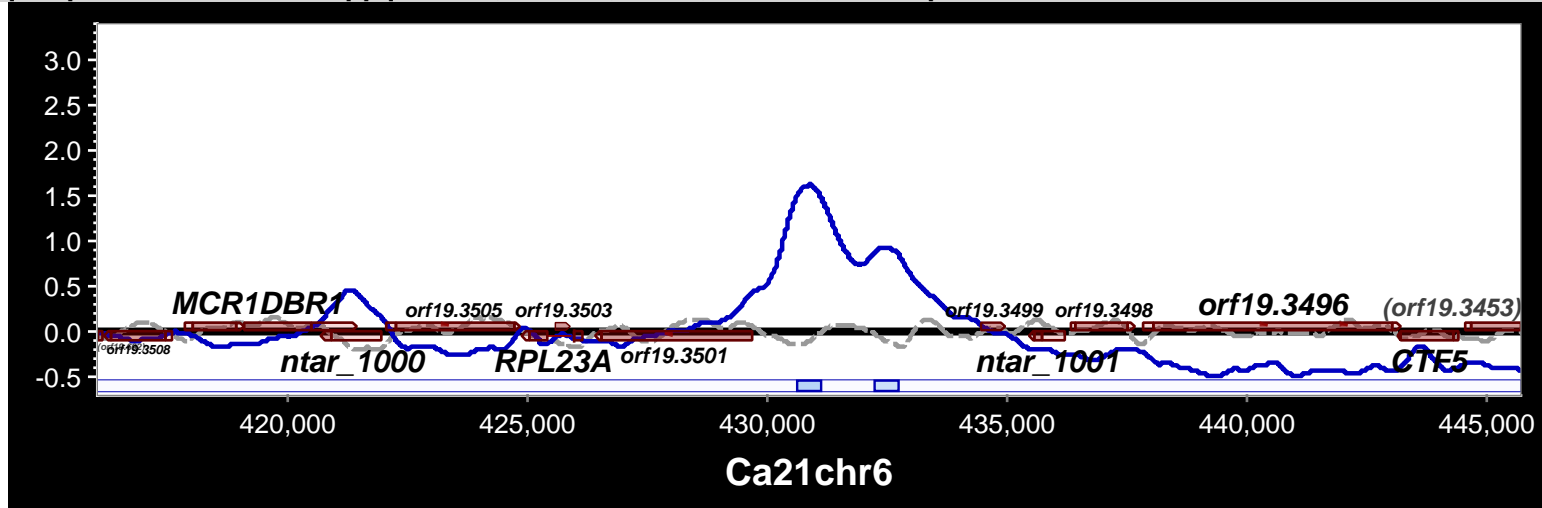

[1.61] Ca21chr2:244192-273875 [+] [orf19.1449, orf19.1448.1, SRB9, APT1, orf19.1447]

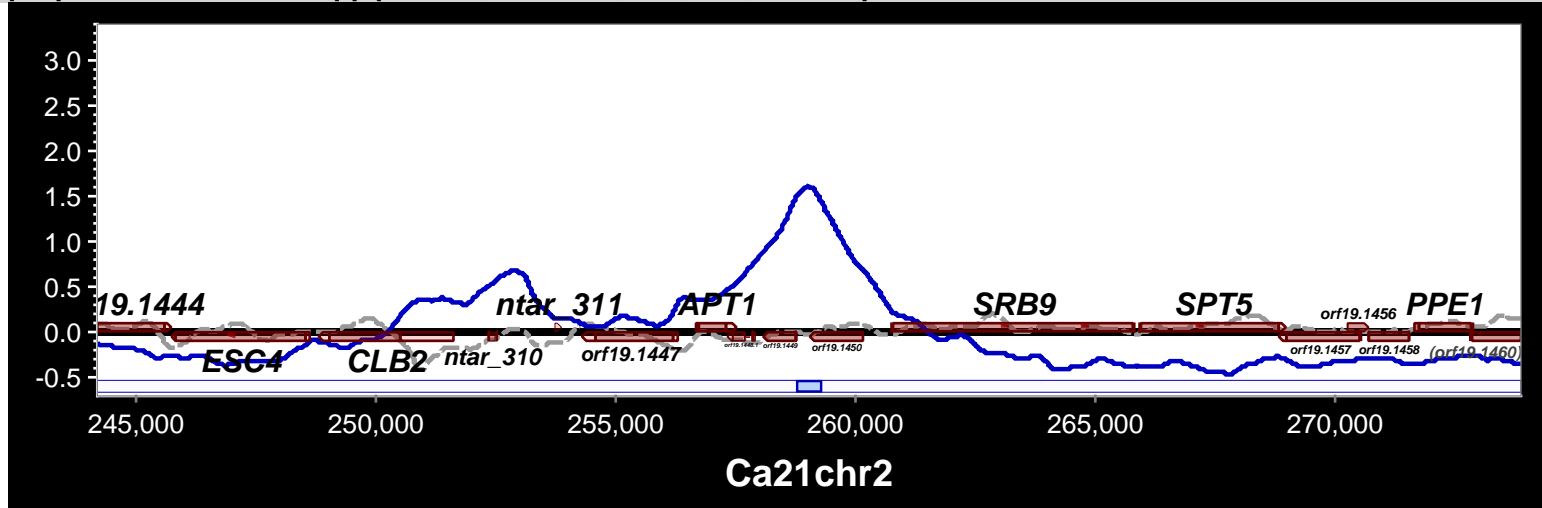

[1.607] Ca21chr4:611561-641244 [+] [t(UGU)1, orf19.2691, orf19.2690, GST2, TYS1]

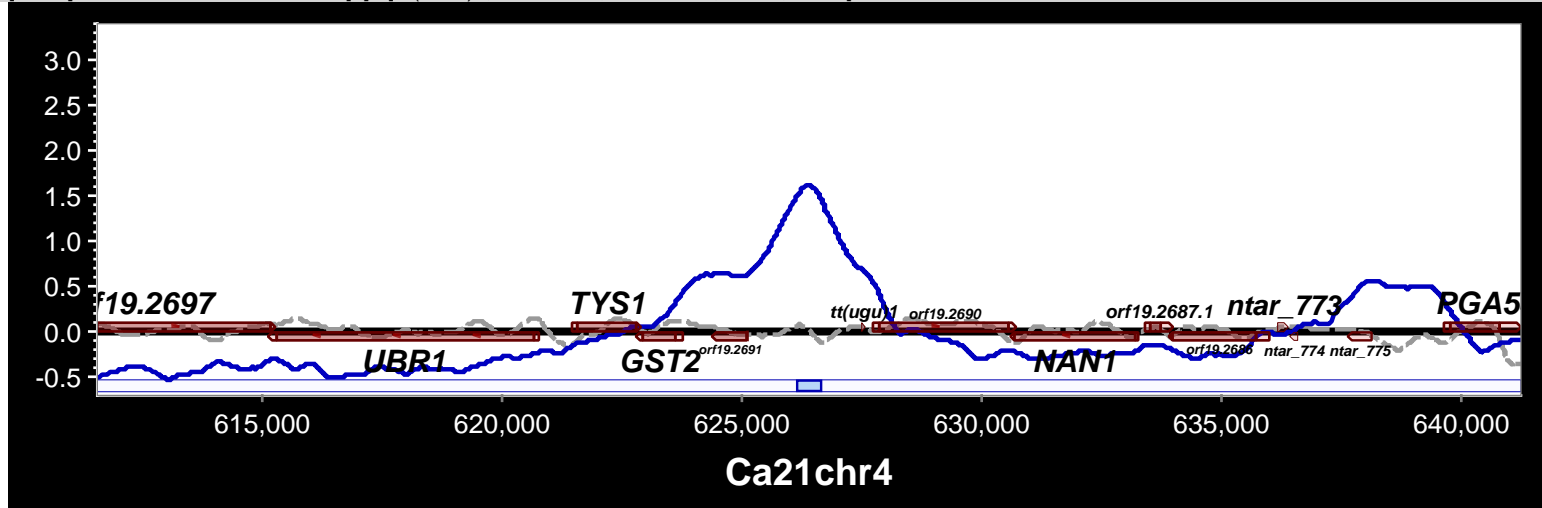



[1.607] Ca21chr5:514531-544214 [+] [orf19.4246, orf19.4245, orf19.4247, orf19.4248, orf19.4244]

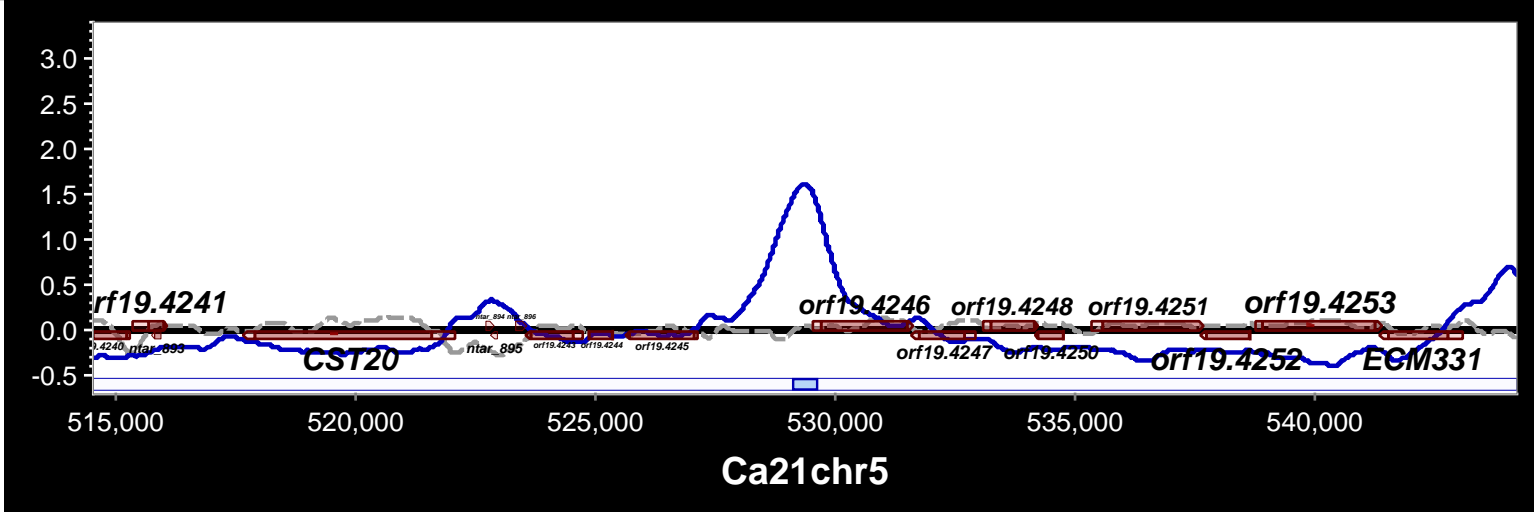

[1.605] Ca21chr2:309839-339522 [+] [tL(CAA)1, orf19.1488, MSB2, orf19.1490.1, orf19.1486]

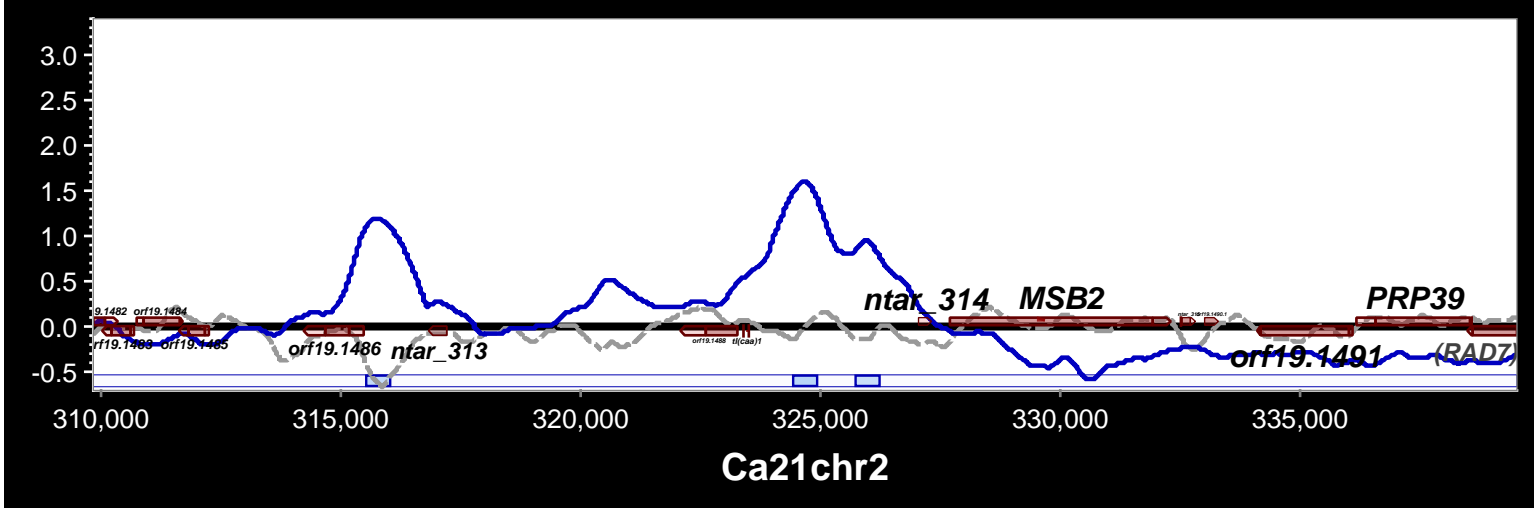

[1.603] Ca21chr1:1816052-1845735 [+] [ADH2, orf19.5114, orf19.5114.1, TKL1, OLE1]

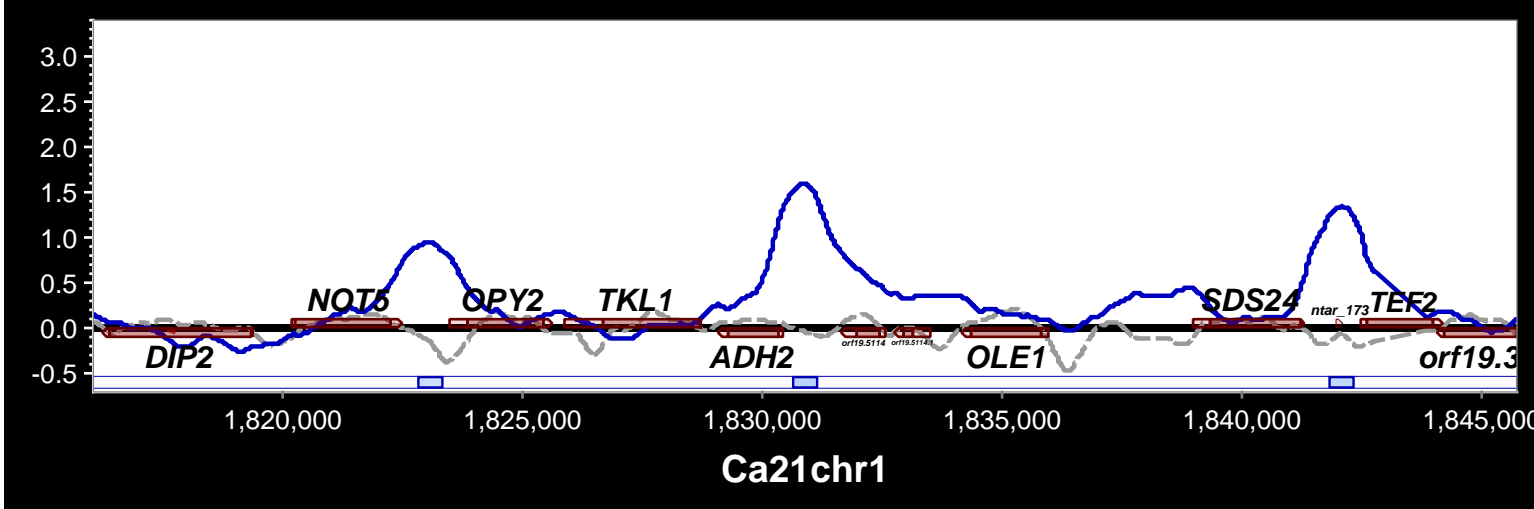

[1.603] Ca21chr2:459219-488902 [+] [orf19.1562, ECM3, POB3, HOM2, orf19.1564]

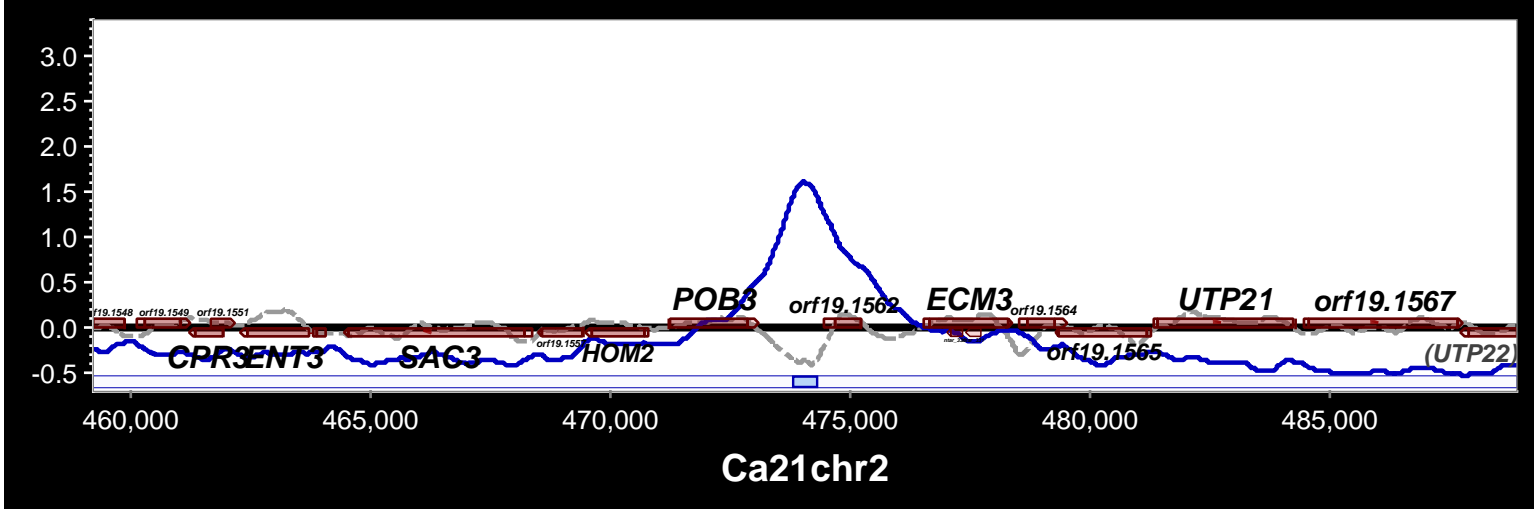

[1.598] Ca21chr3:1430507-1460190 [+] [ALS7, ISW2, TSA1B, HNT2, orf19.7420]

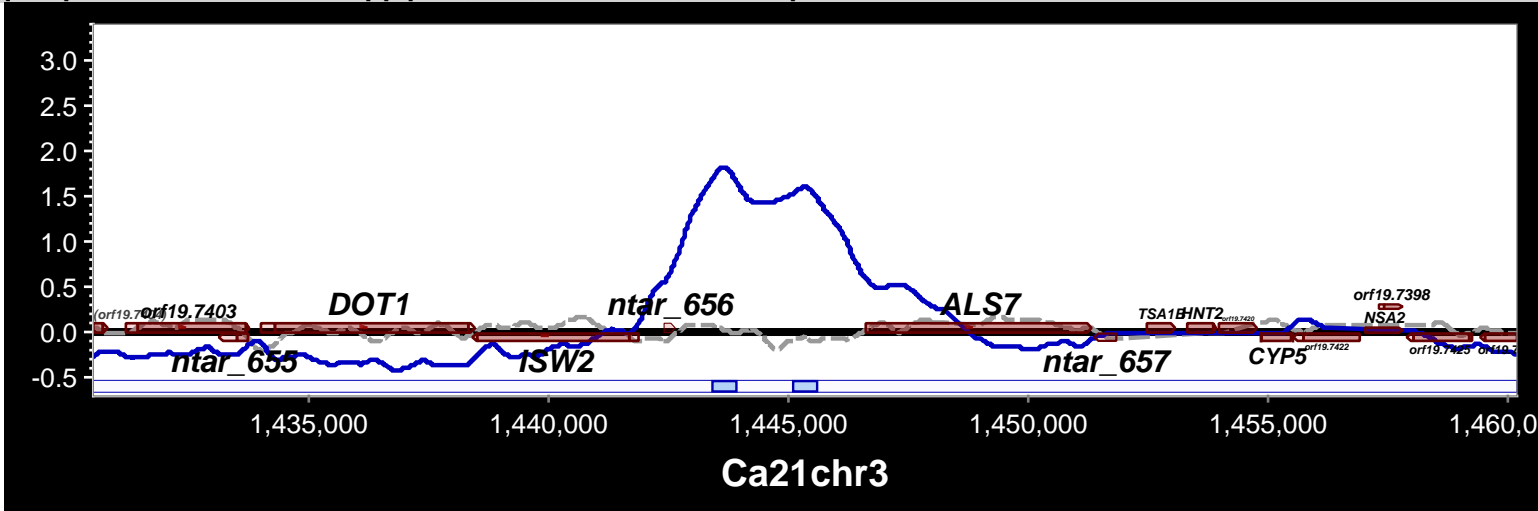

[1.597] Ca21chr1:2179146-2208829 [+] [SWE1, SFU1, DBP3, ERO1, orf19.4872]

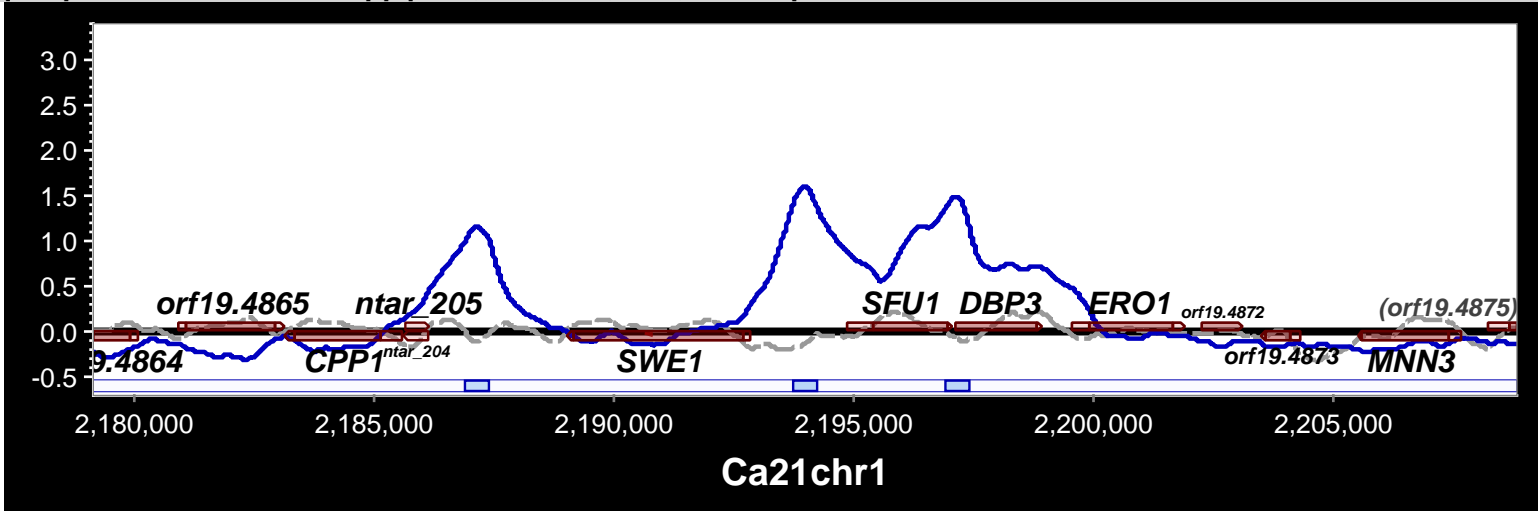

[1.597] Ca21chr4:362284-391967 [+] [orf19.4600, PHO89, orf19.4600.1, orf19.4601, orf19.4597]

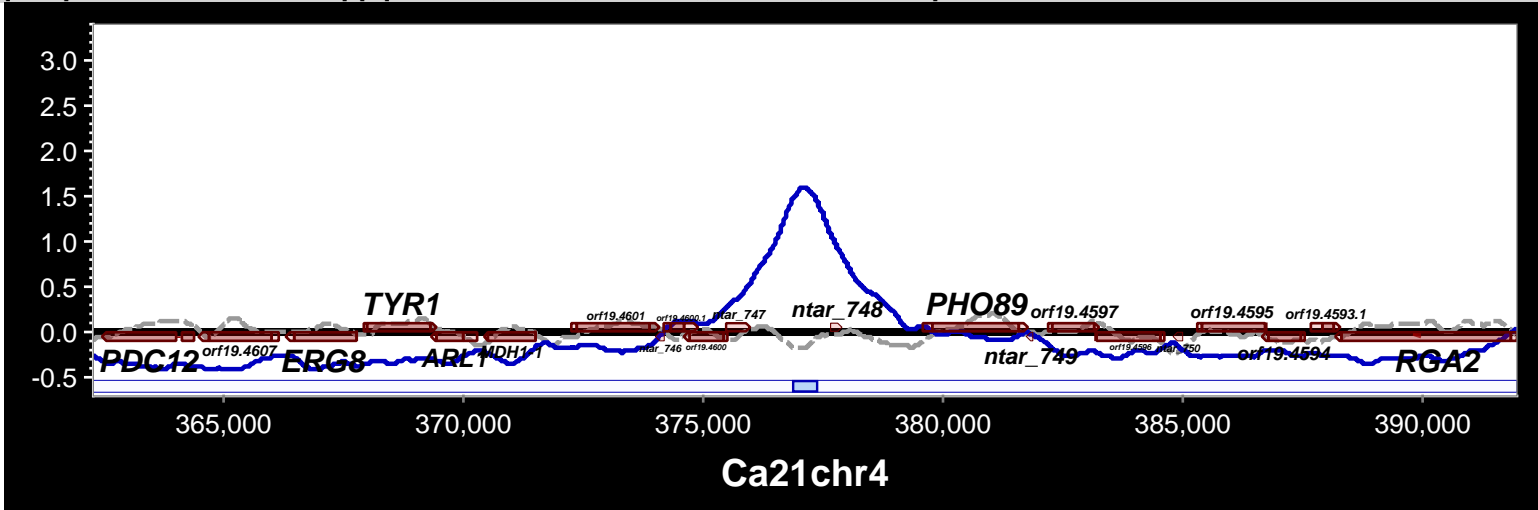

[1.593] Ca21chr1:2506750-2536433 [+] [PHO84, DPP1, orf19.1171, SAM2, ARO7]

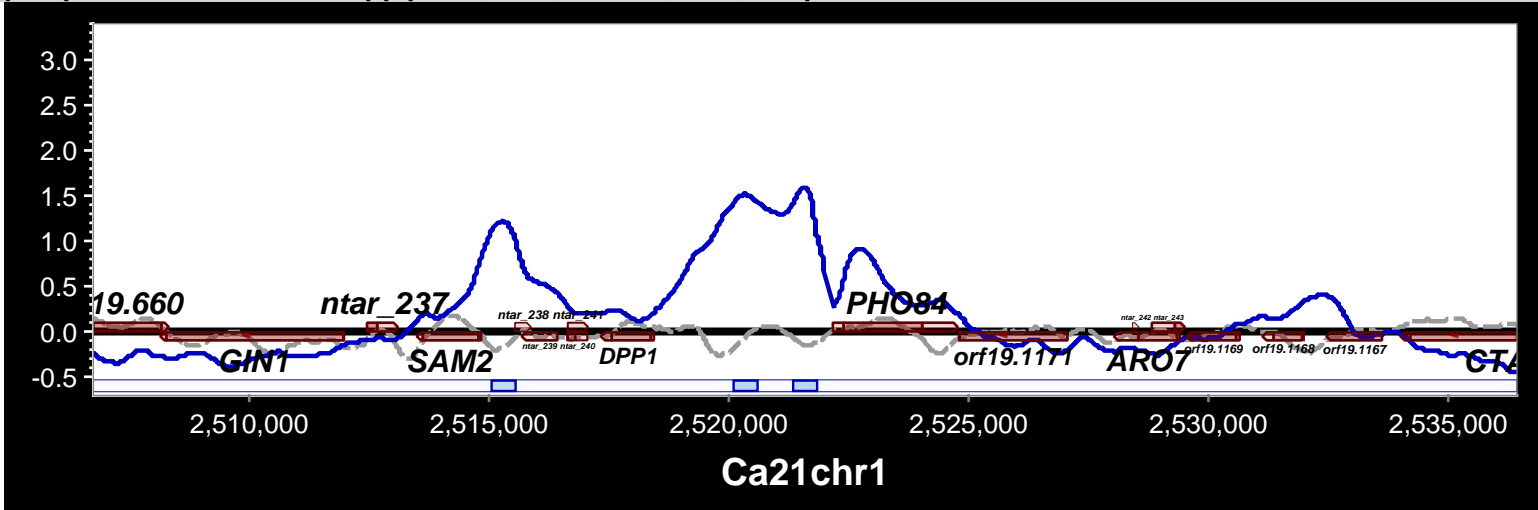

[1.593] Ca21chr3:138410-168093 [+] [MIH1, orf19.5376, HOS2, SCL1, FOX2]

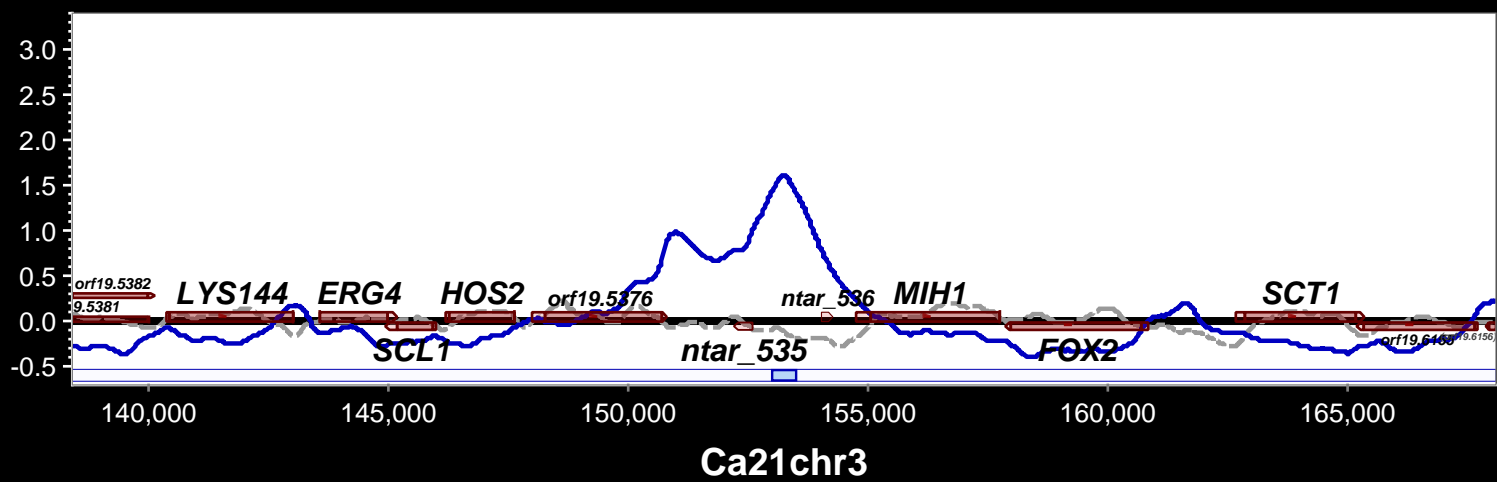

[1.589] Ca21chrR:828709-858392 [+] [KRE1, orf19.4376, RPS30, orf19.4375, orf19.4378]

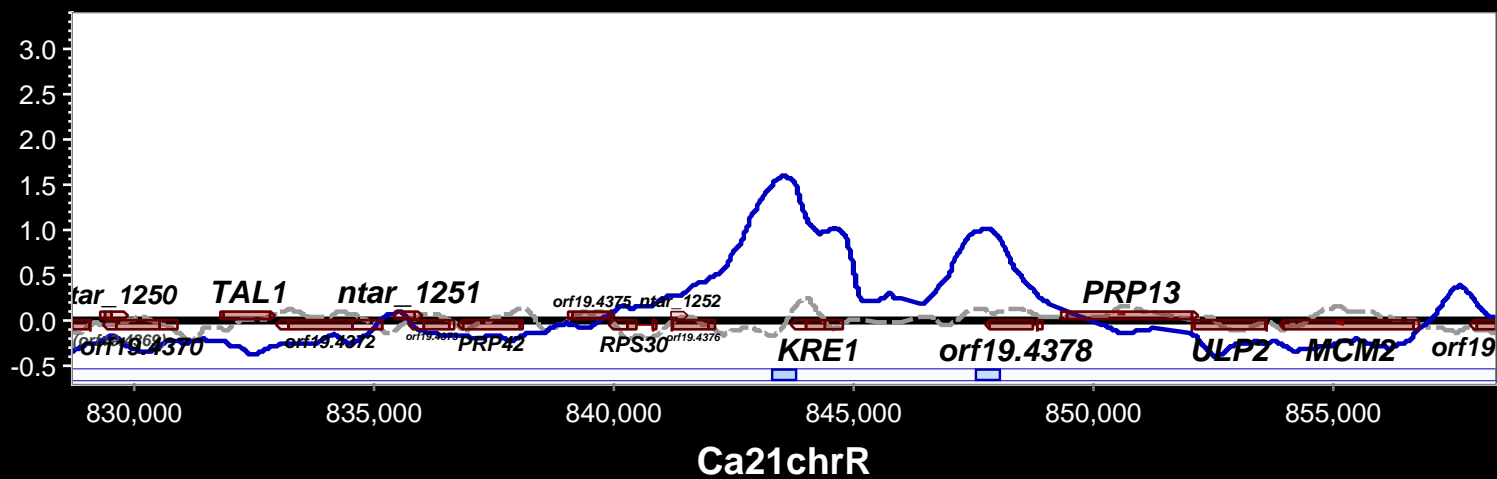

[1.587] Ca21chr2:438600-468283 [+] [OPI1, orf19.1544, HEX3, orf19.1545, orf19.1546]

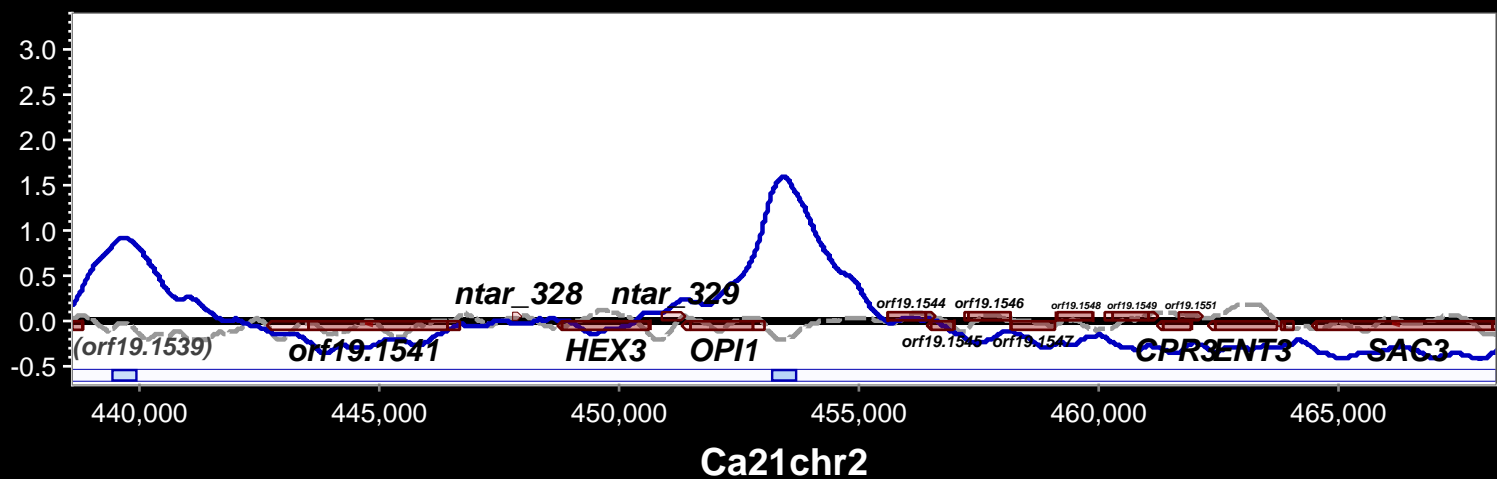

[1.586] Ca21chr6:297841-327524 [+] [orf19.3431, orf19.3432, orf19.3430, OYE23, orf19.3434]

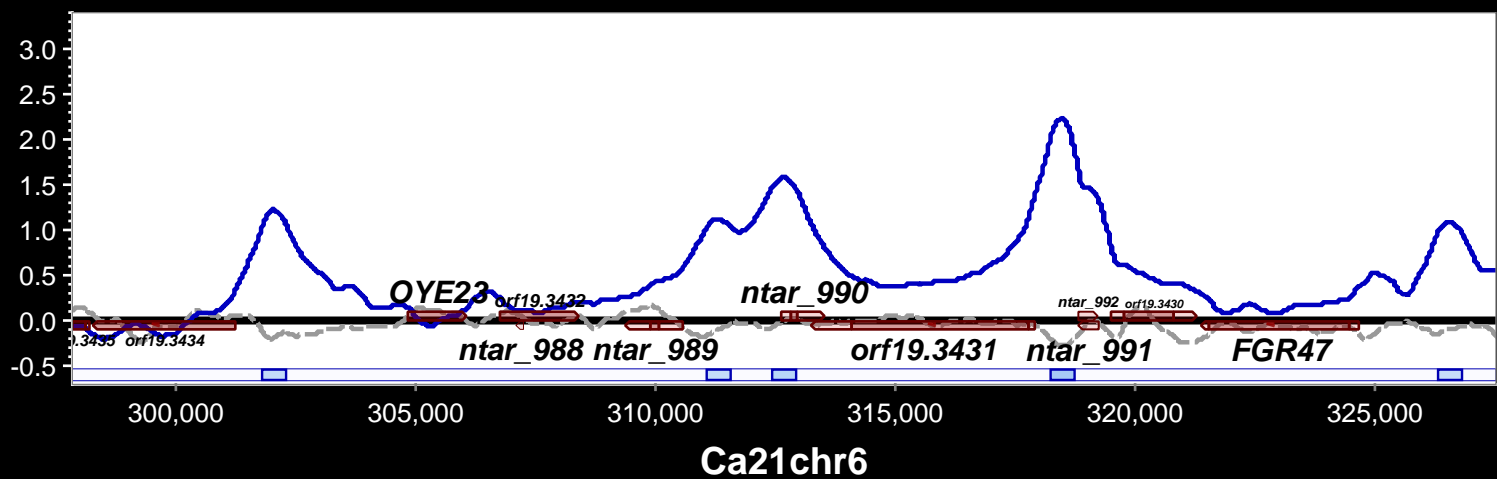

[1.583] Ca21chr2:1053758-1083441 [+] [WH11, CDC21, orf19.3548, orf19.3547, SGO1]

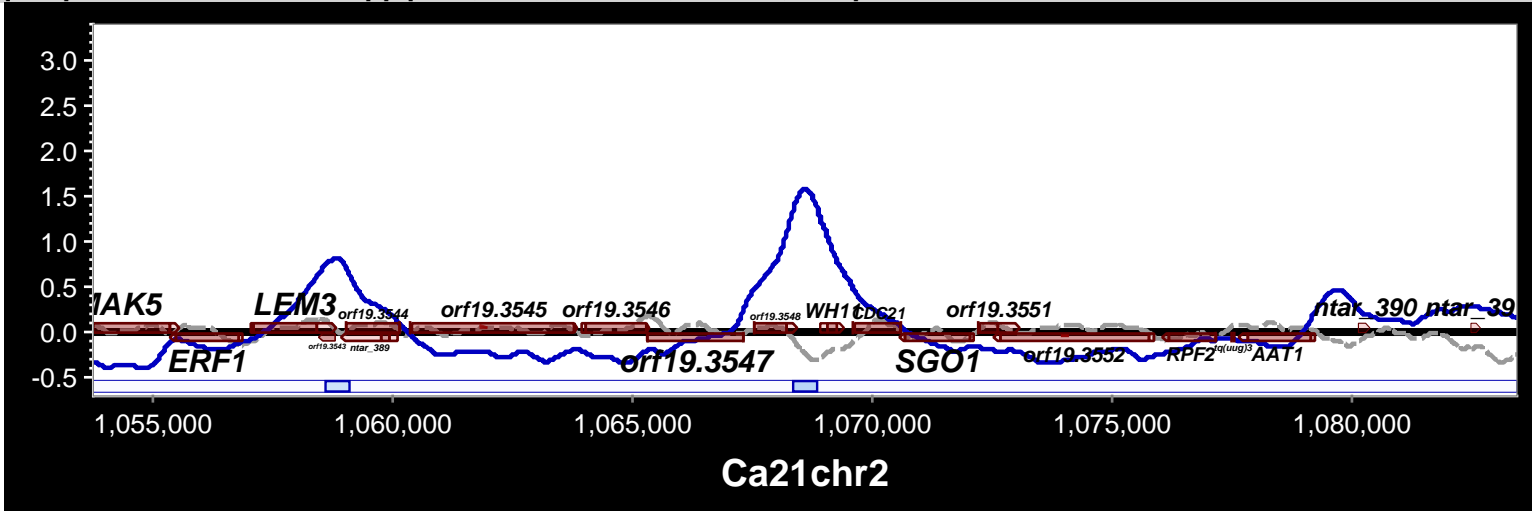

[1.583] Ca21chr2:1318913-1348596 [+] [orf19.34, orf19.31, orf19.30, orf19.35, orf19.29]

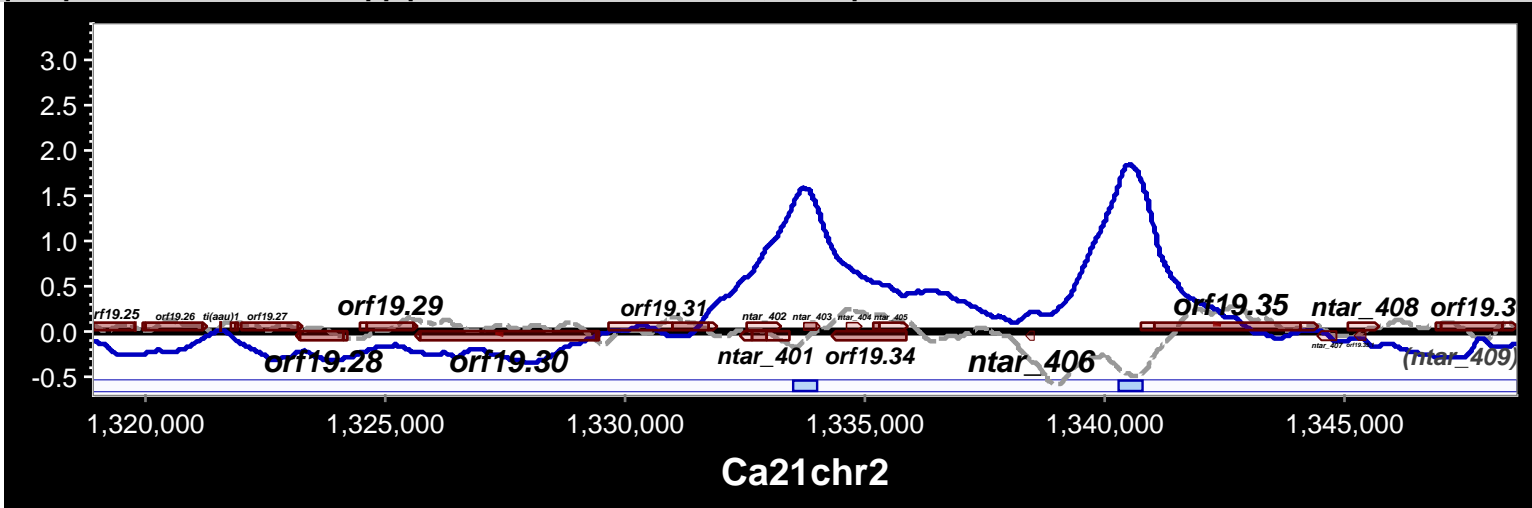

[1.577] Ca21chr1:697979-727662 [+] [EHT1, orf19.3041, TPS2, orf19.3042, orf19.3037]

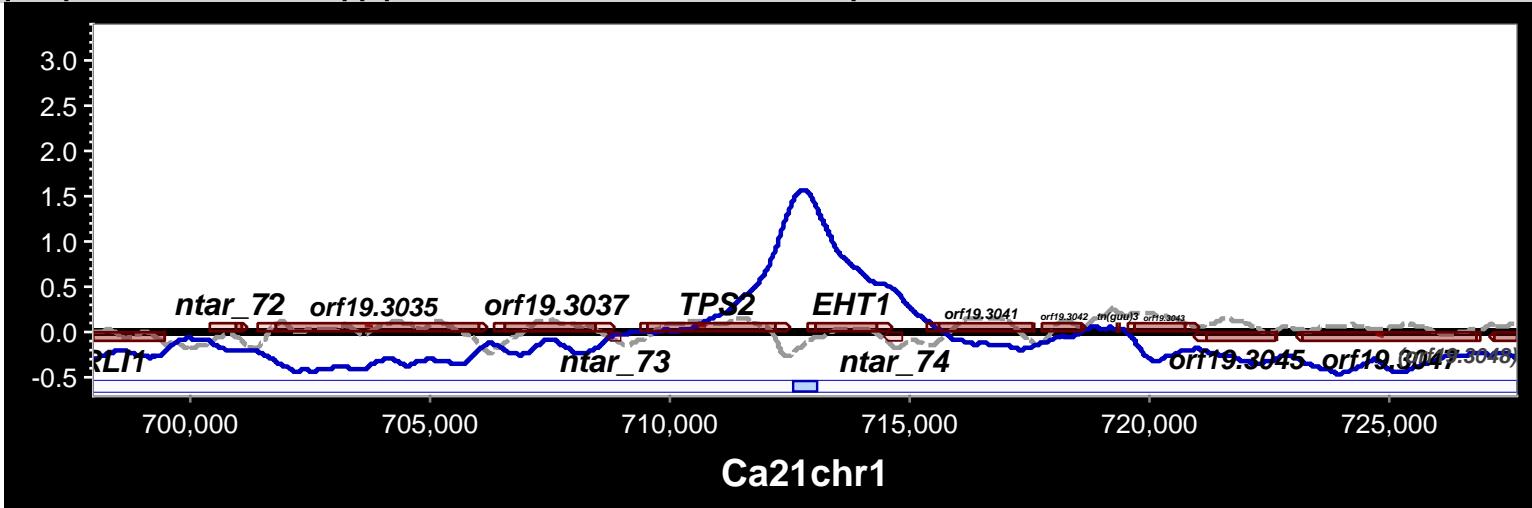

[1.577] Ca21chr7:438742-468425 [+] [CUP9, EXO70, LIG1, GRX1, orf19.6509]

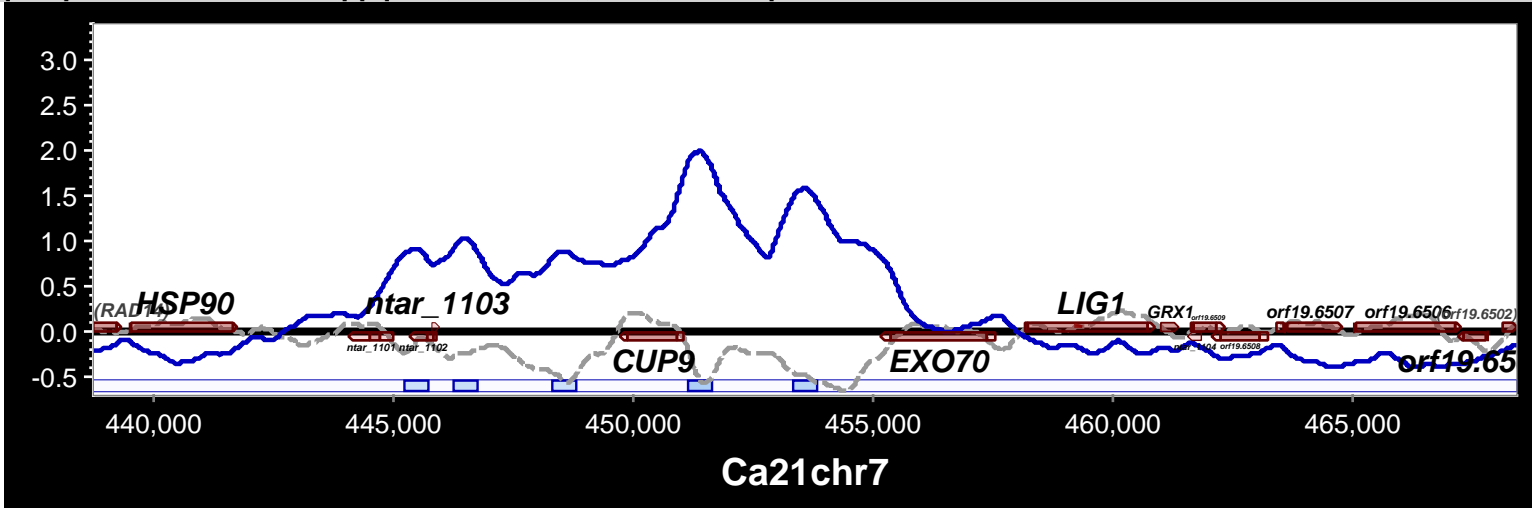

[1.569] Ca21chr1:2836026-2865709 [+] [OP4, orf19.4936, orf19.4936.1, FAD3, orf19.4932]

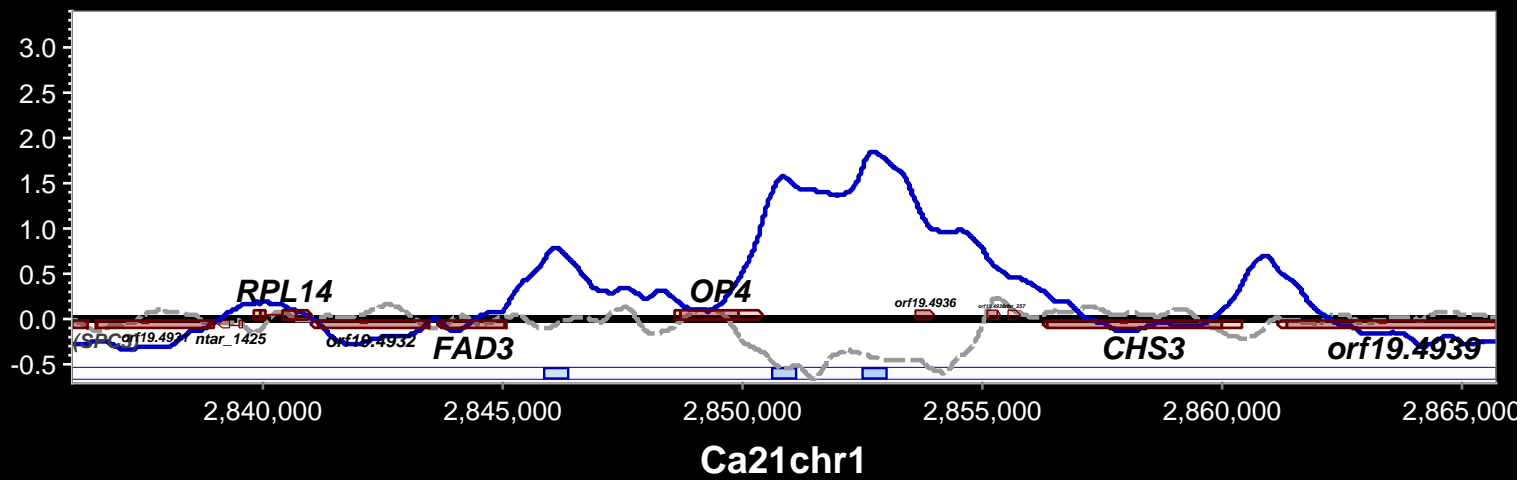

[1.569] Ca21chr5:1071921-1101604 [+] [orf19.3984, orf19.3983, orf19.3986, orf19.3982, orf19.3988]

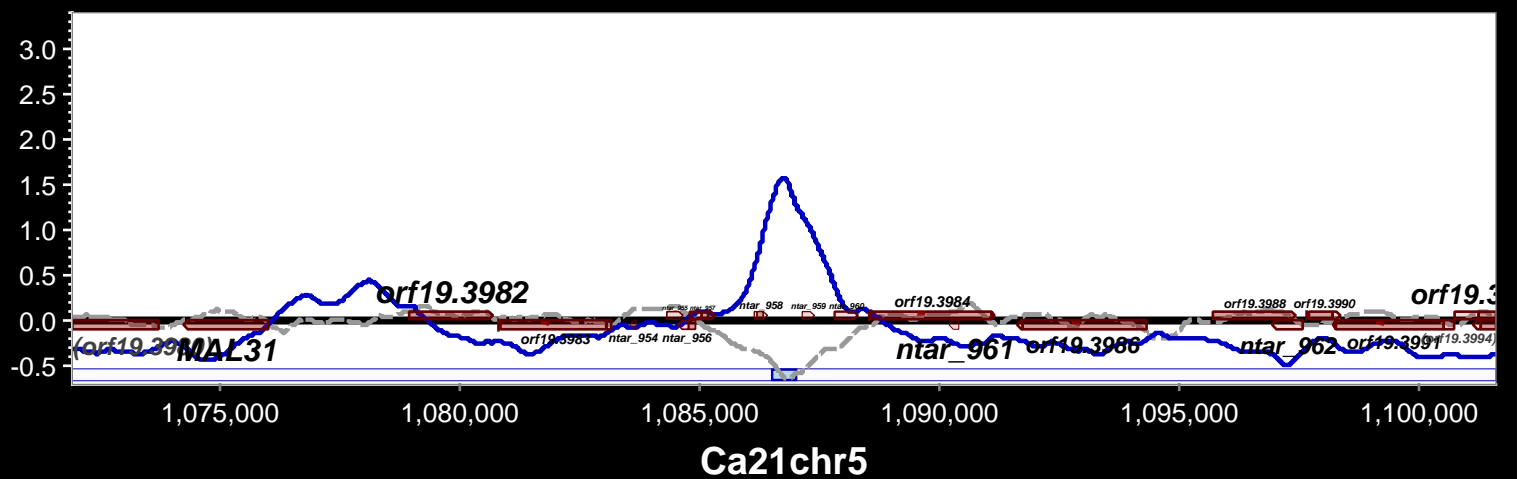

[1.568] Ca21chr4:954573-984256 [+] [orf19.3831, PHR1, orf19.3828, orf19.3833, orf19.3836]

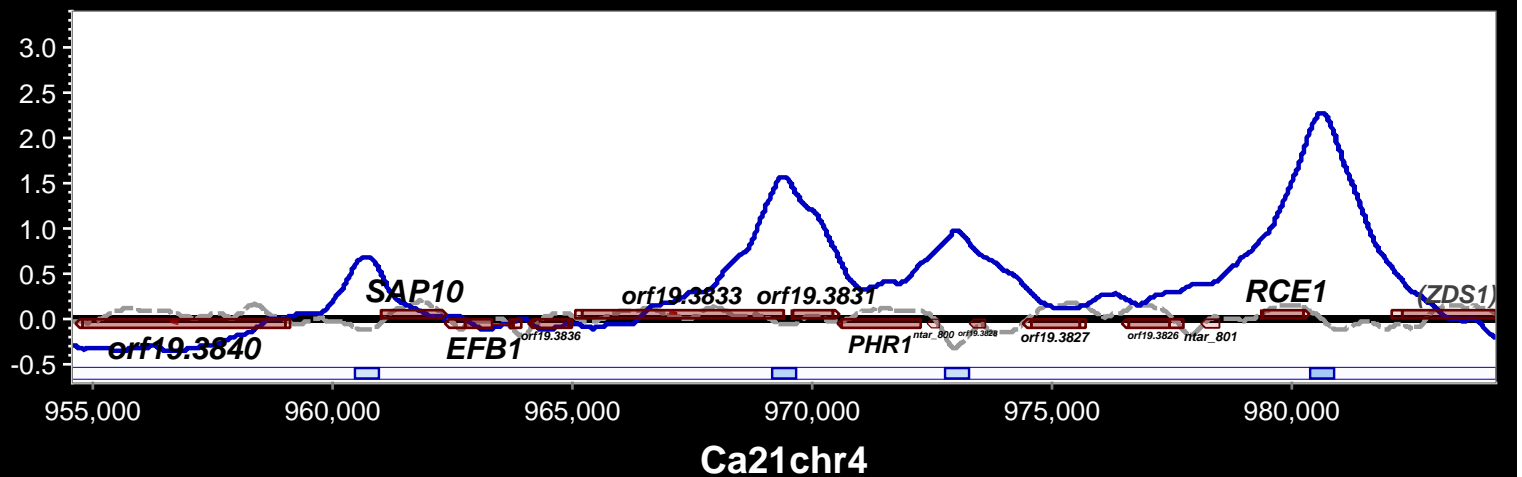

[1.564] Ca21chrR:906525-936208 [+] [RPL15A, orf19.494, ADE17, orf19.491, orf19.496]

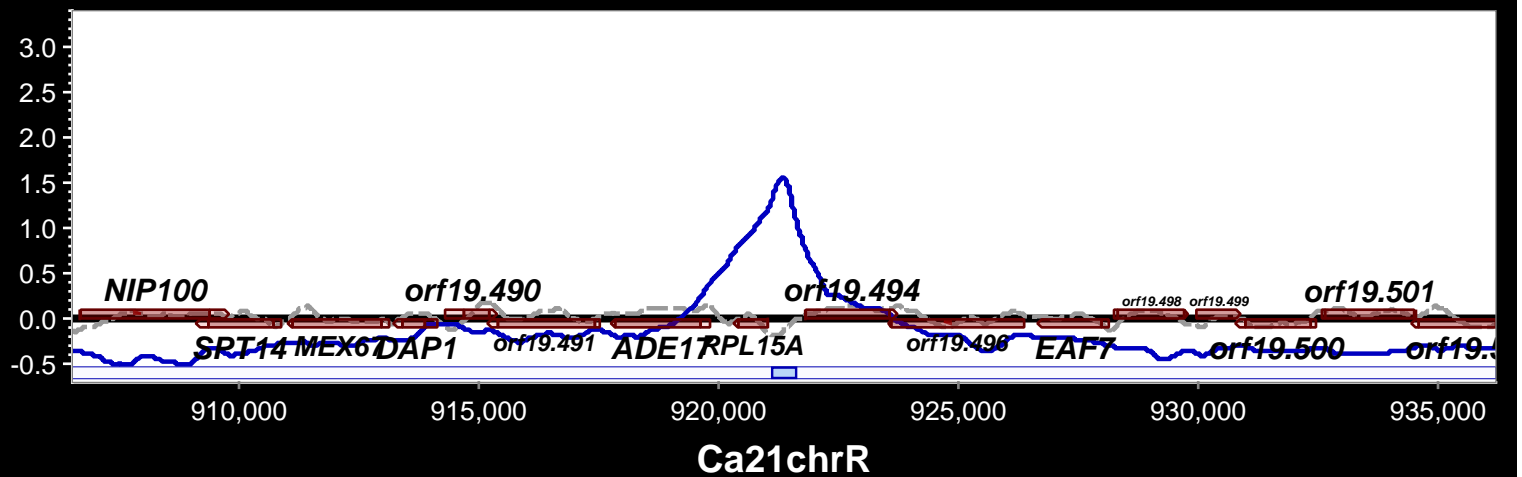

[1.56] Ca21chr2:1128339-1158022 [+] [orf19.6873.1, RPS8A, tS(AGA)4, orf19.6872, orf19.6874]

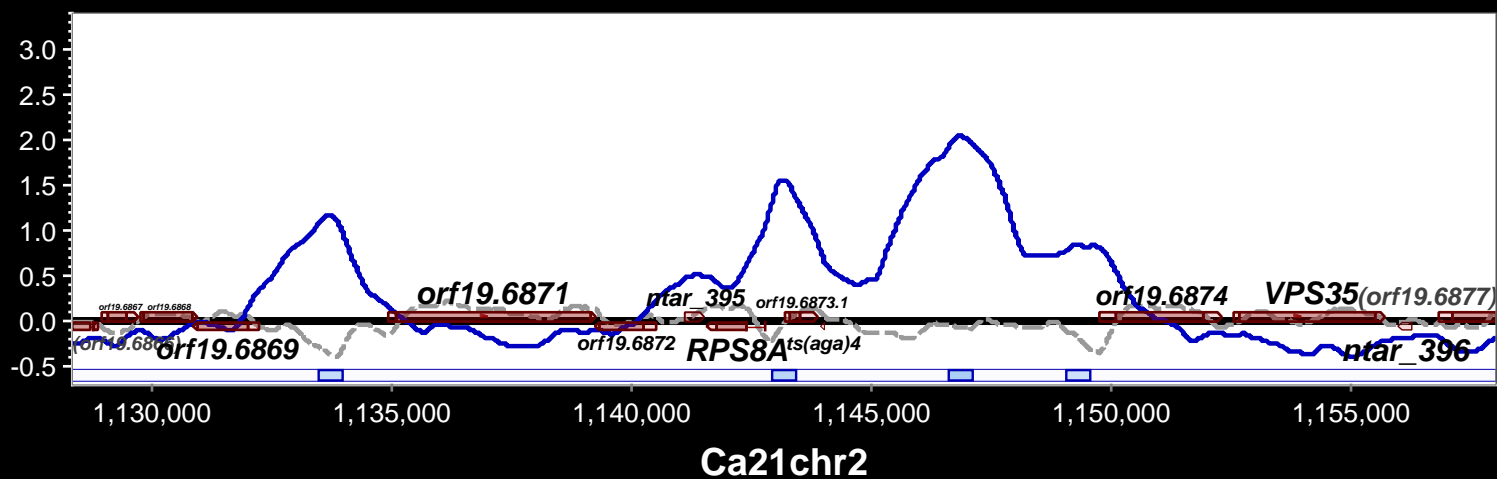

[1.546] Ca21chr5:954343-984026 [+] [orf19.3924, orf19.3925, orf19.3926, PGA37, orf19.3922]

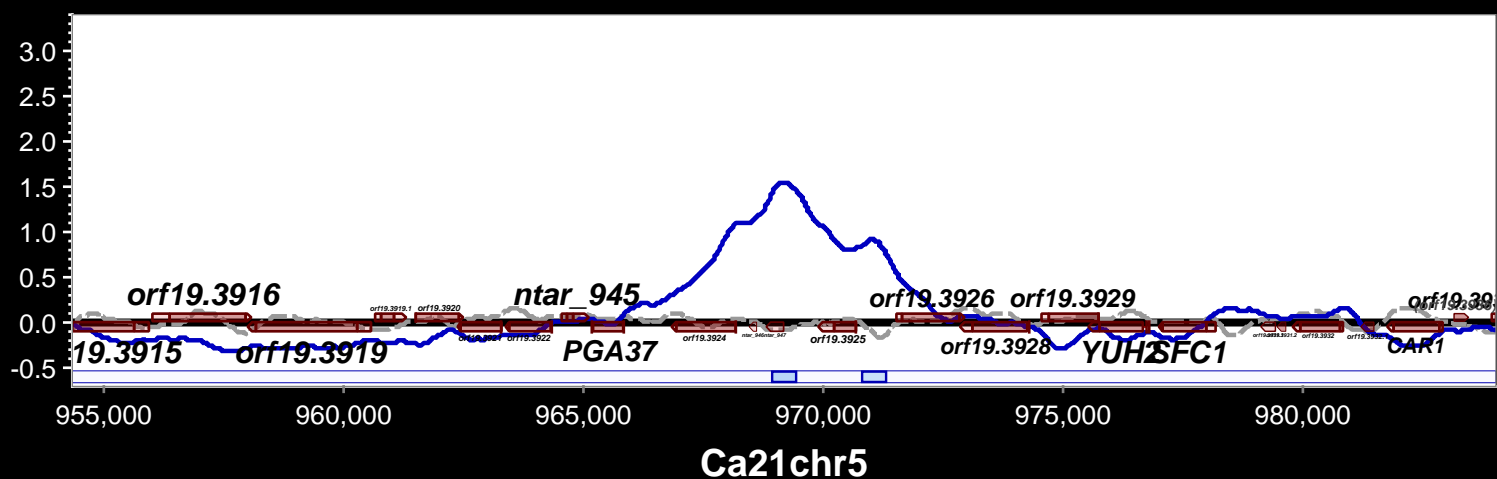

[1.545] Ca21chr7:203878-233561 [+] [orf19.7011, orf19.7010, orf19.7009, orf19.7012, orf19.7013]

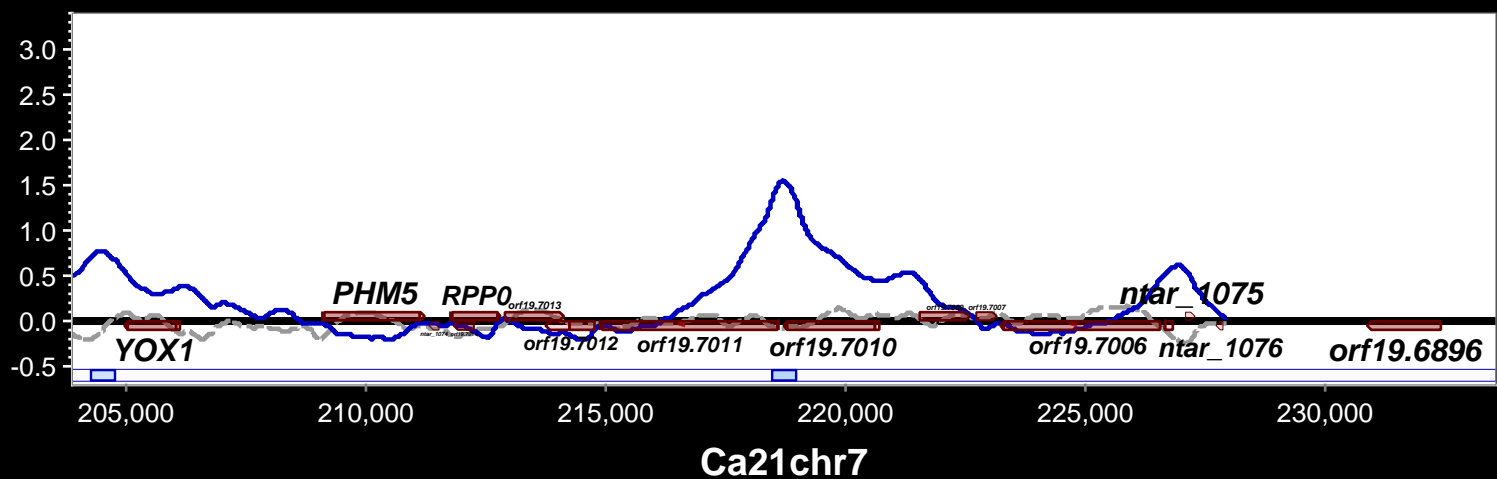

[1.544] Ca21chr5:218945-248628 [+] [orf19.1961, orf19.1963, orf19.1964, BUD23, orf19.1967]

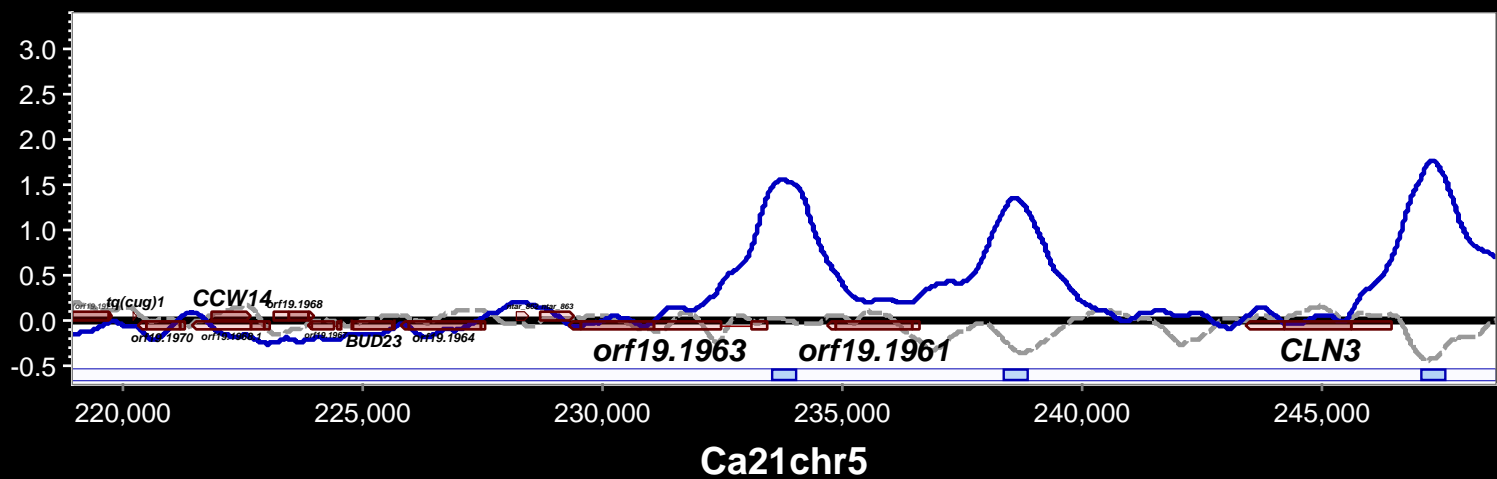

[1.543] Ca21chr5:923887-953570 [+] [orf19.3905, orf19.3904, orf19.3906, orf19.3903, orf19.3907]

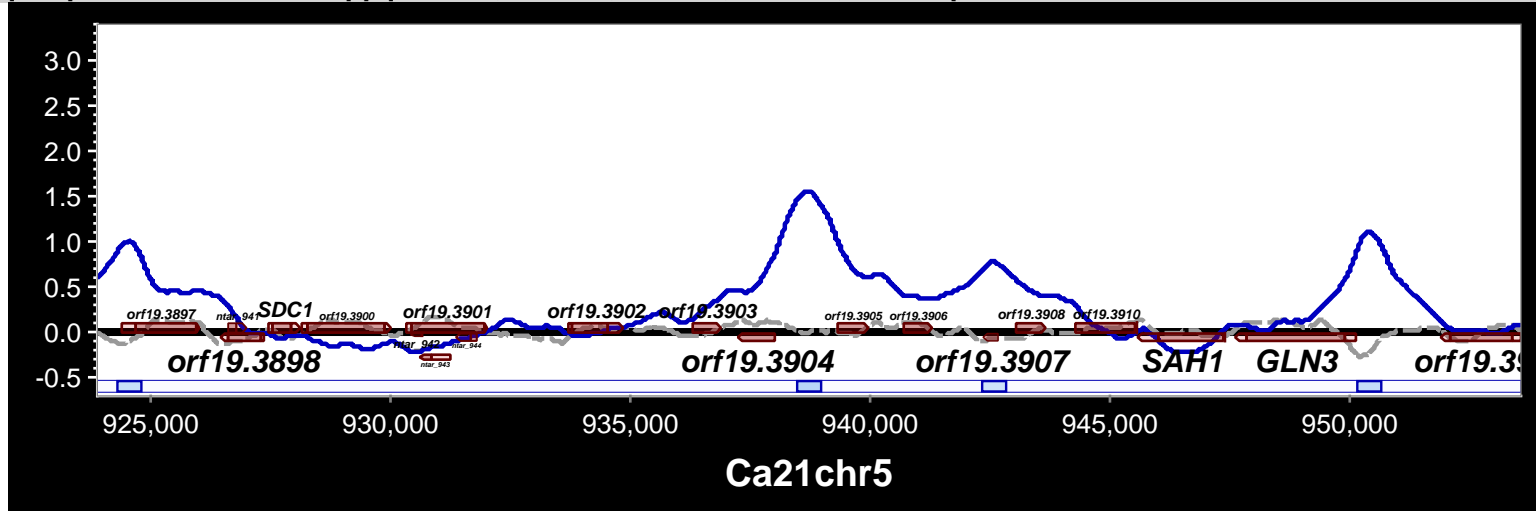

[1.525] Ca21chr1:1835089-1864772 [+] [GCV2, SAM4, GCR3, orf19.384, CAF16]

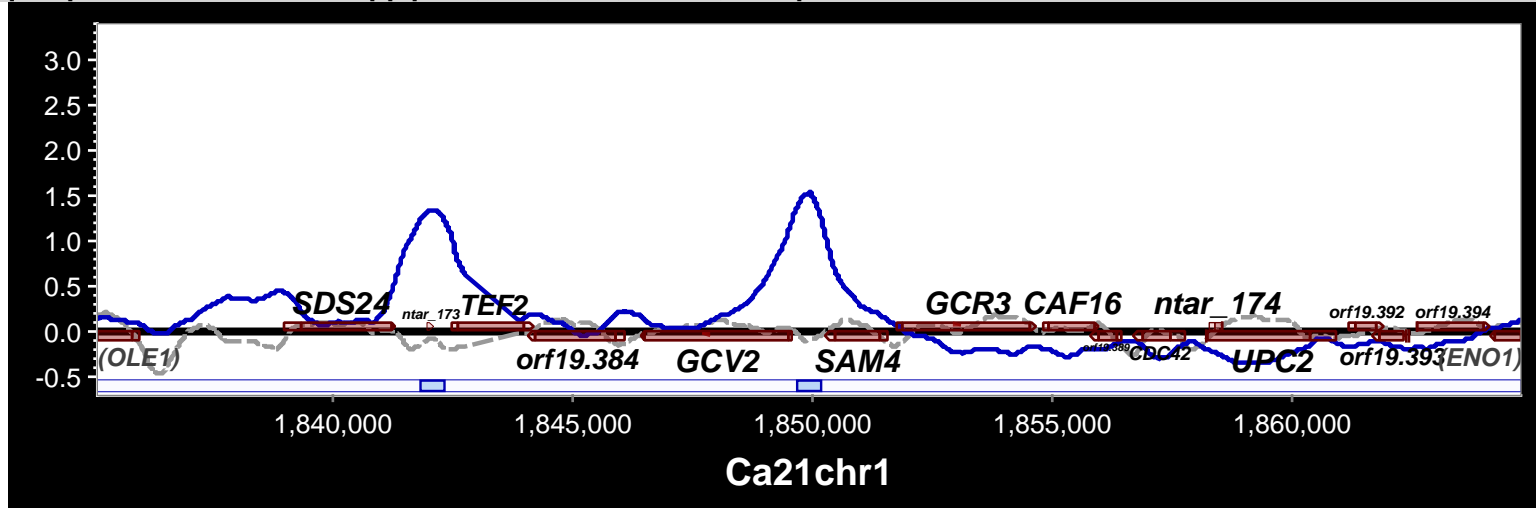

[1.525] Ca21chr7:908161-937844 [+] [orf19.7149, NRG1, TPO2, orf19.7151, orf19.7144]

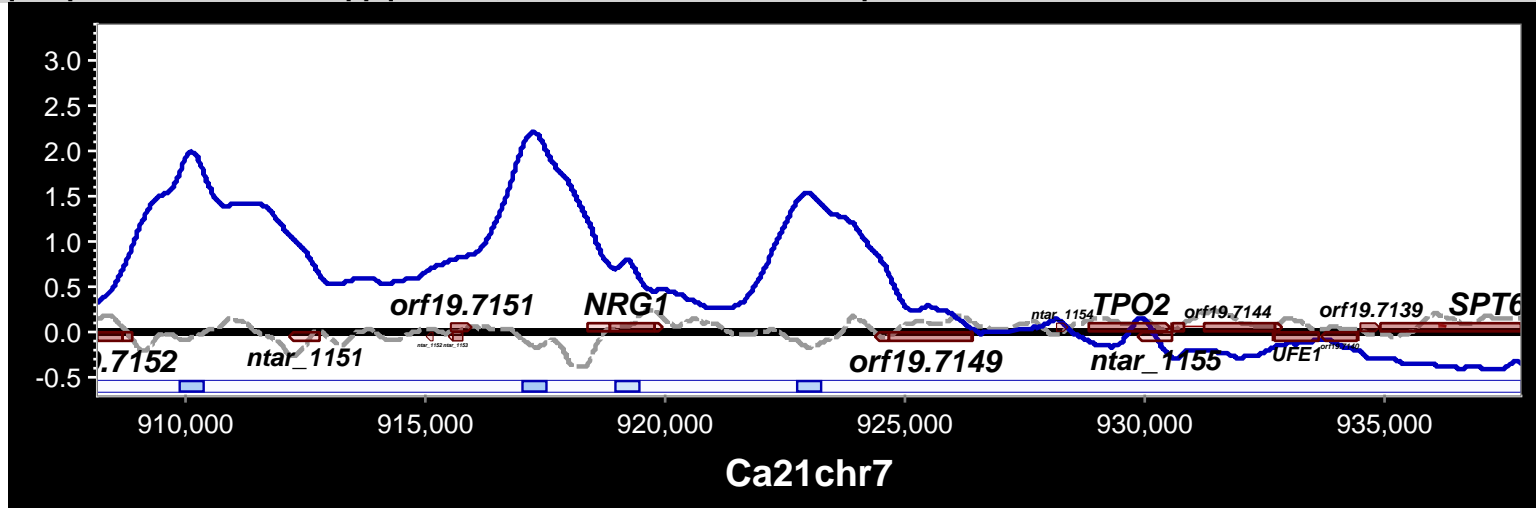

[1.525] Ca21chrR:572274-601957 [+] [orf19.2822, orf19.2821, orf19.2820, orf19.2819, orf19.2818]

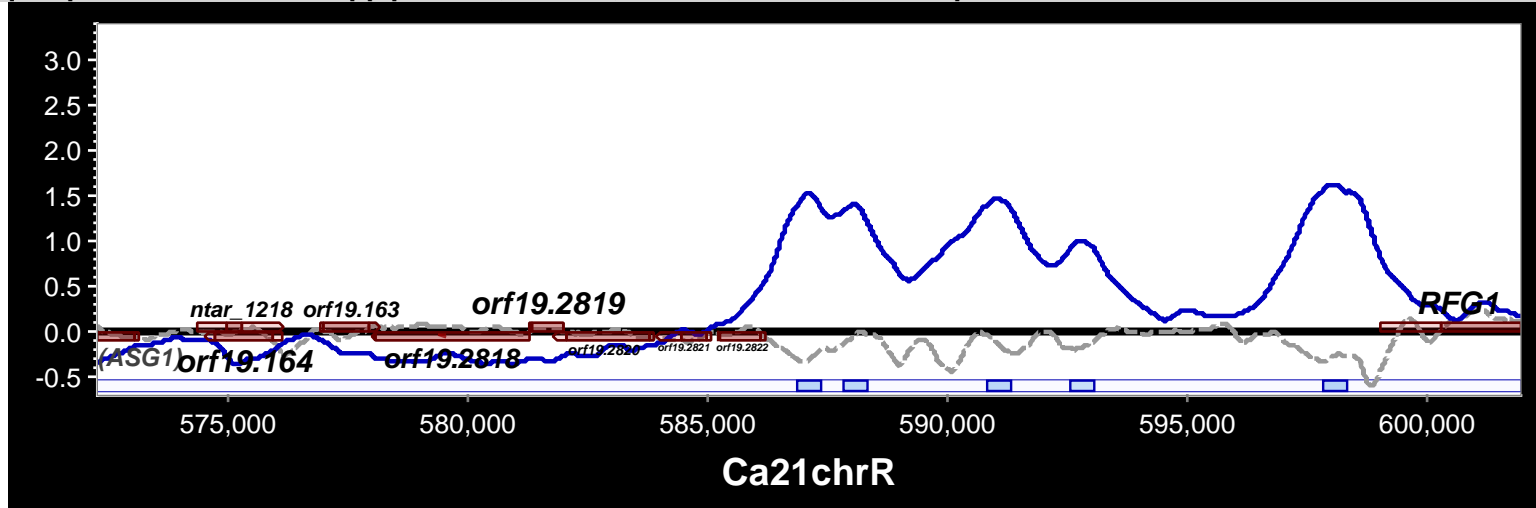

[1.523] Ca21chr2:2059220-2088903 [+] [CYC1, orf19.1769, orf19.1771, orf19.1772, orf19.1768]

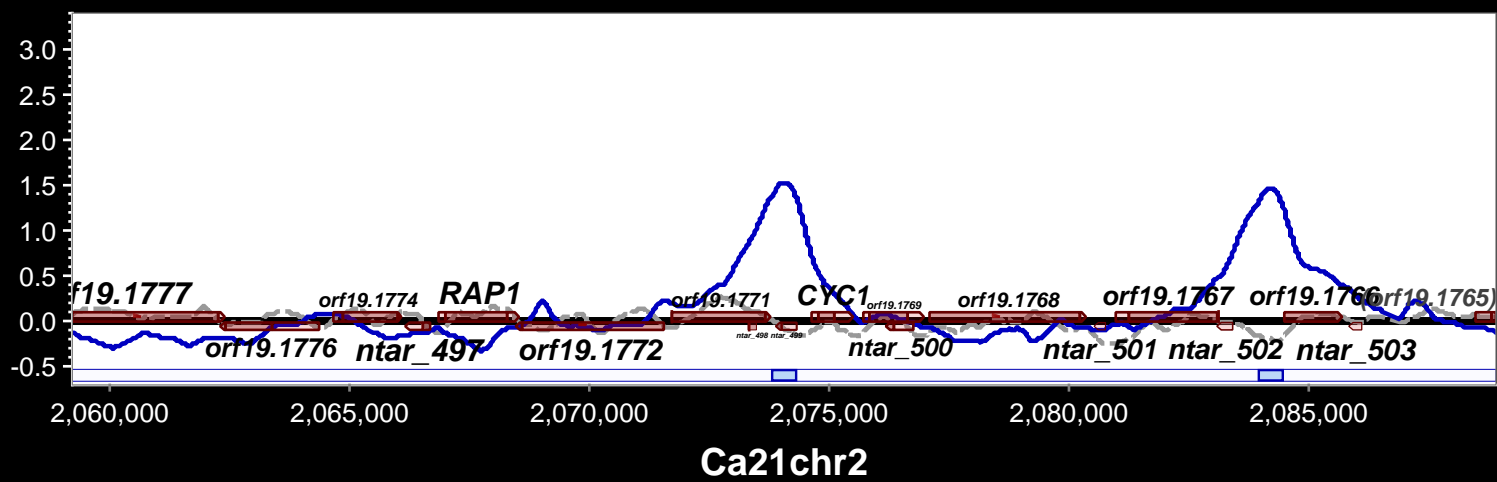

[1.521] Ca21chr4:211270-240953 [+] [AGP2, tD(GUC)6, orf19.4680, orf19.4678, orf19.4677]

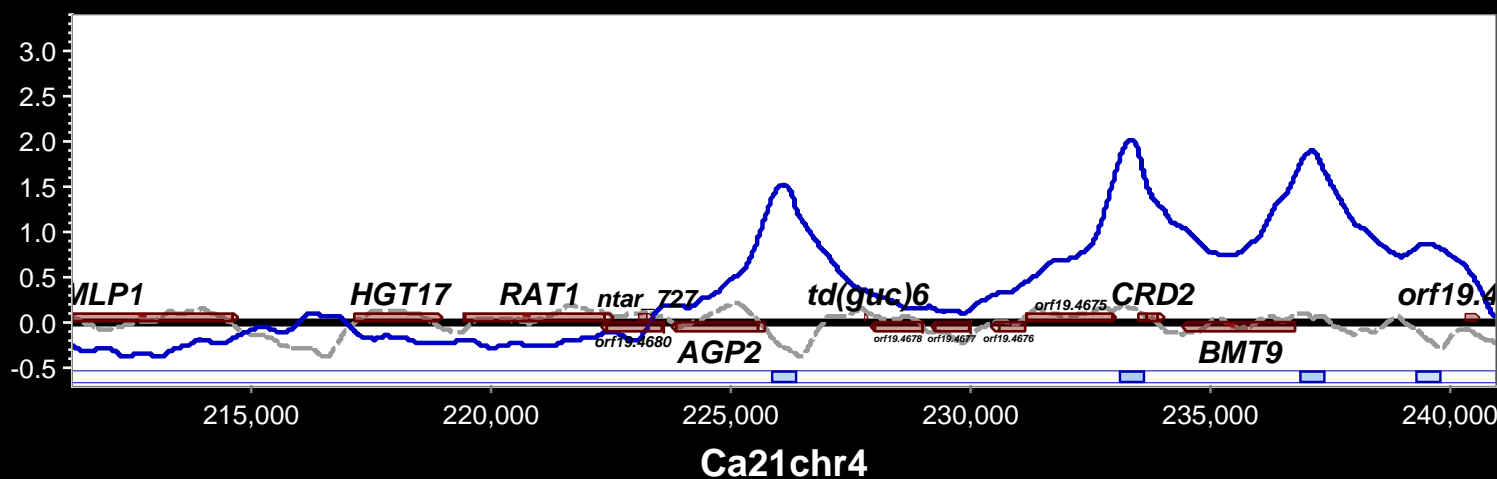

[1.521] Ca21chr5:1005210-1034893 [+] [orf19.3954.1, MES1, orf19.3956, orf19.3954, orf19.3957]

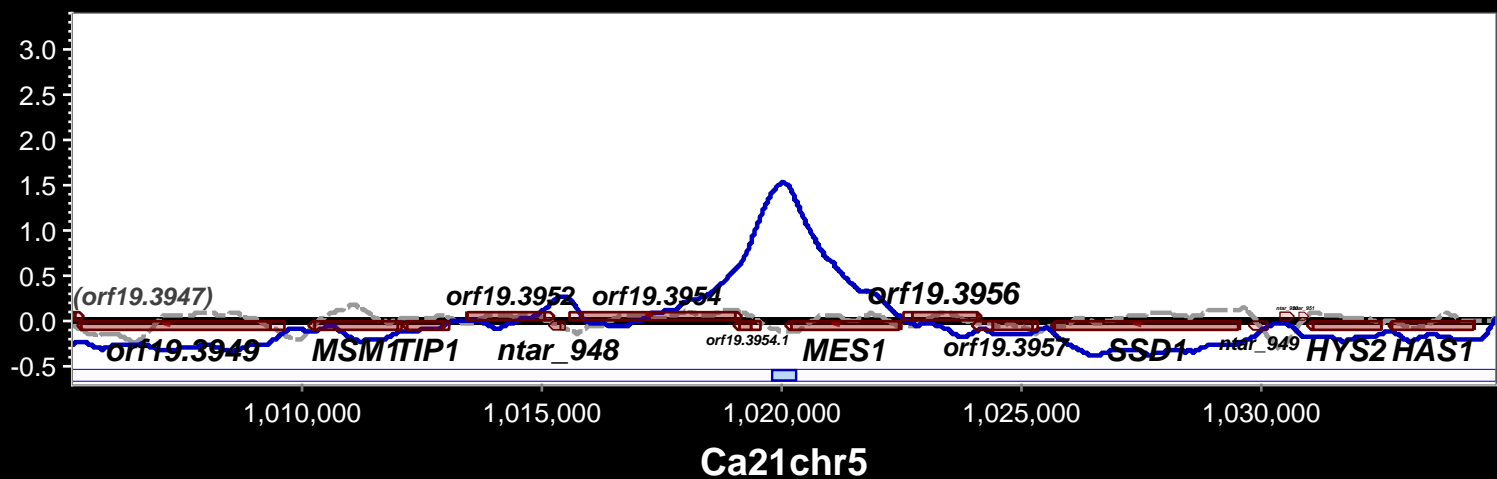

[1.514] Ca21chr4:1292772-1322455 [+] [orf19.1277, orf19.1276, VPS11, GAT1, PGA49]

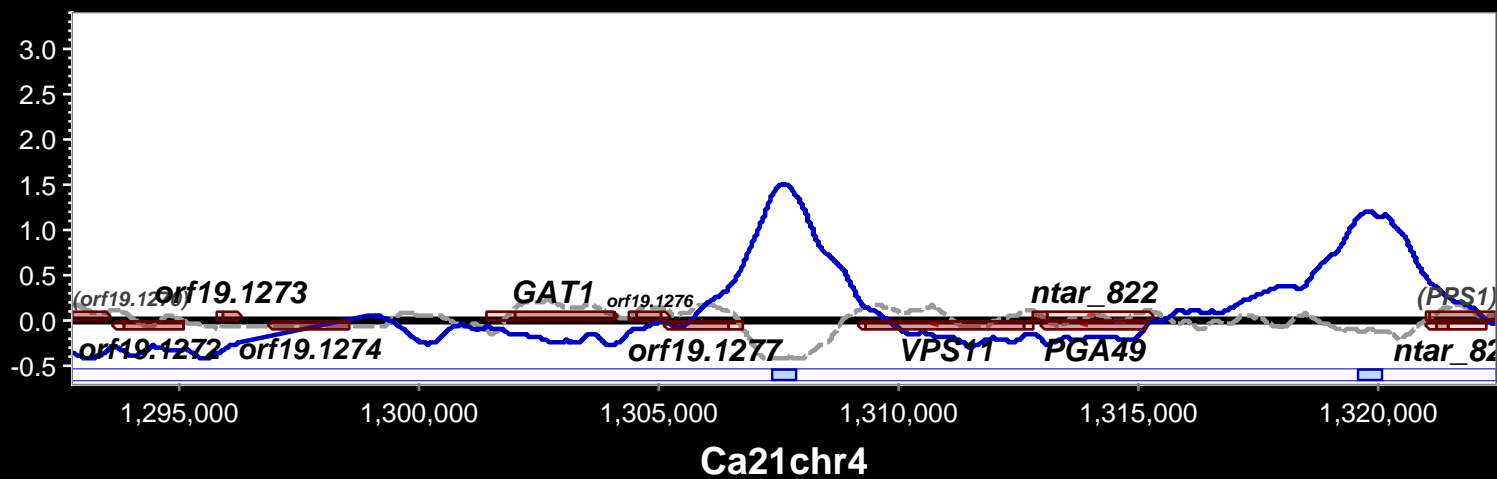



[1.512] Ca21chr1:2505508-2535191 [+] [DPP1, PHO84, SAM2, orf19.1171, GIN1]

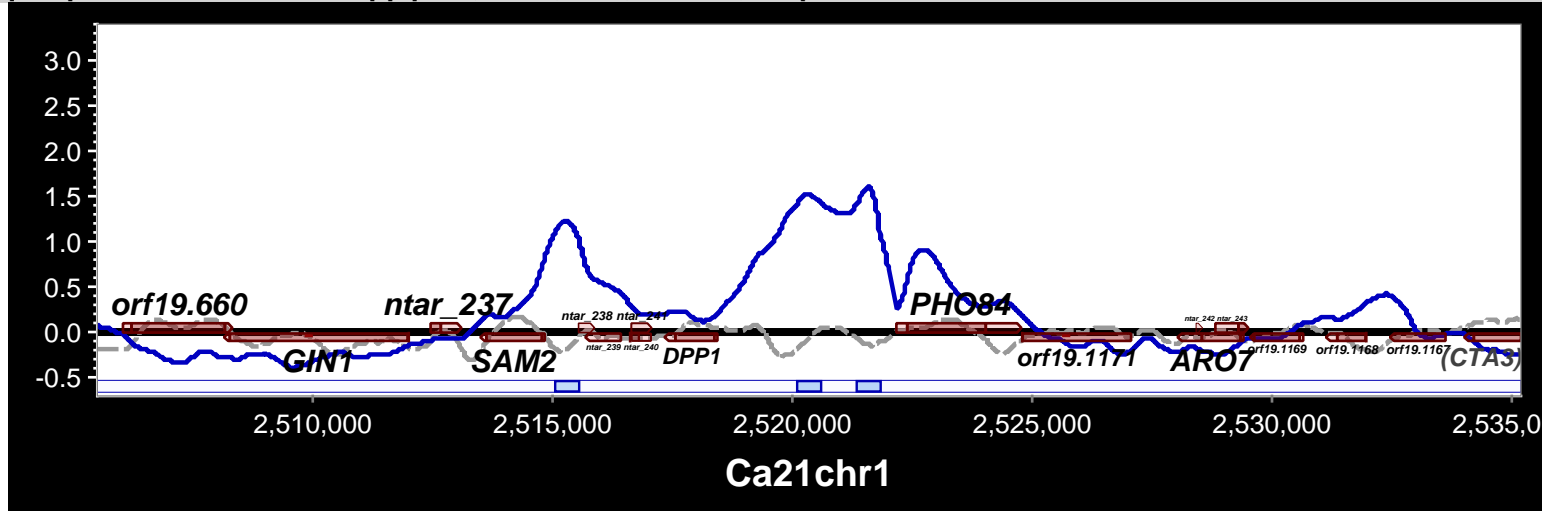

[1.512] Ca21chrR:2047501-2077184 [+] [PLB3, orf19.6592, orf19.6591, RTA4, orf19.6590]

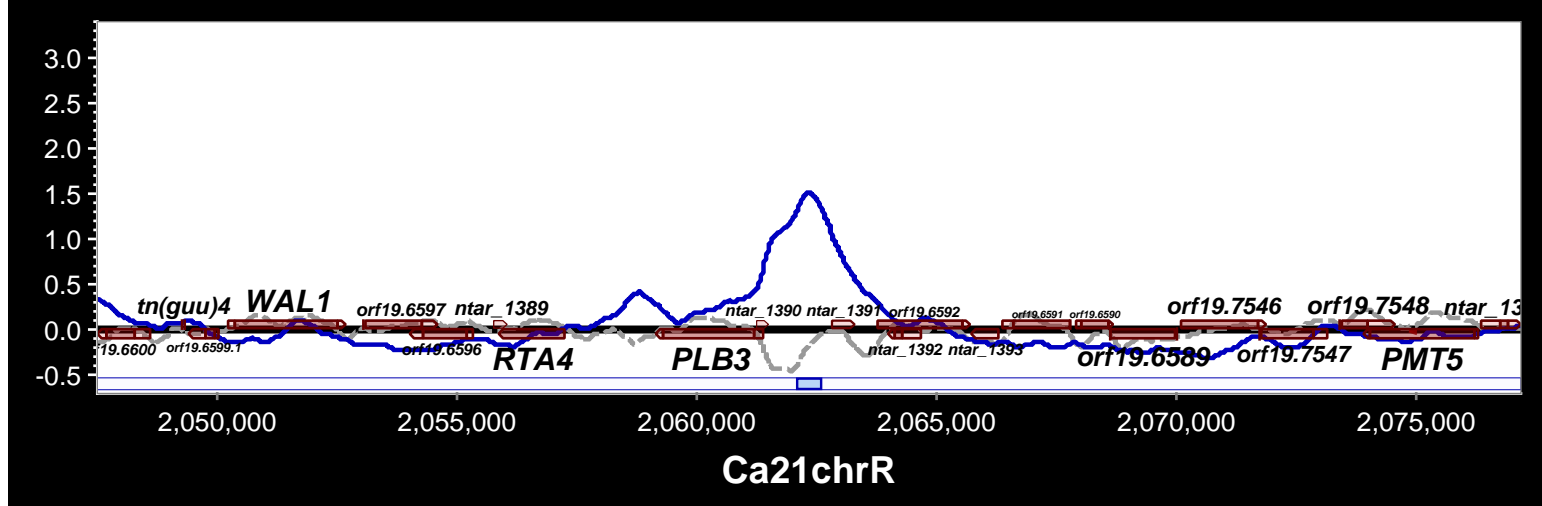

[1.505] Ca21chr1:3135930-3165613 [+] [orf19.7239, NPL3, NCR1, orf19.7243, orf19.7237]

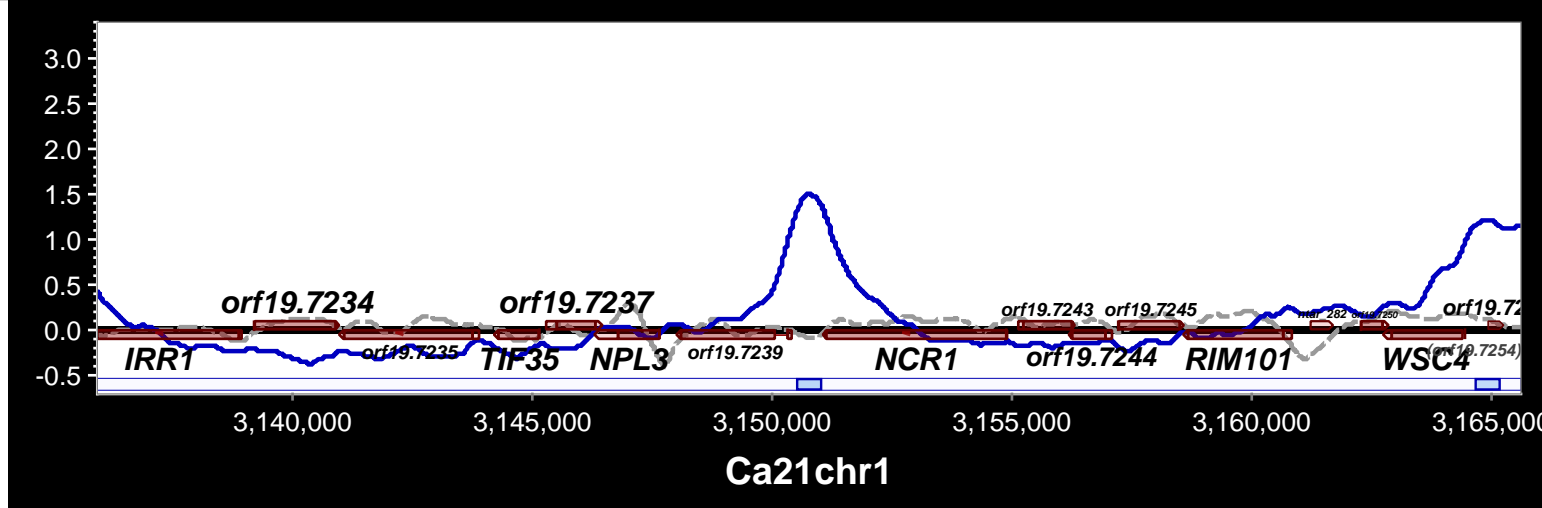

[1.502] Ca21chr1:391533-421216 [+] [HGT1, orf19.4528, orf19.4529, HSP30, orf19.4530.1]

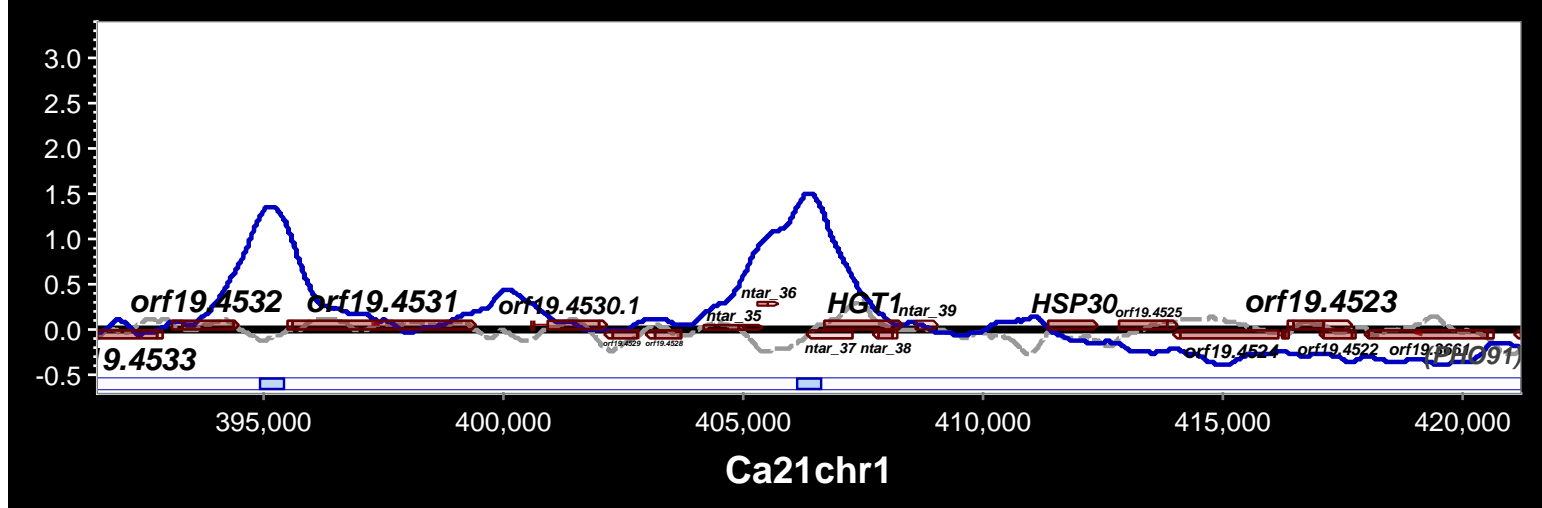

[1.501] Ca21chr1:499887-529570 [+] [orf19.2930, GSC1, orf19.2933, orf19.2934, RPL10]

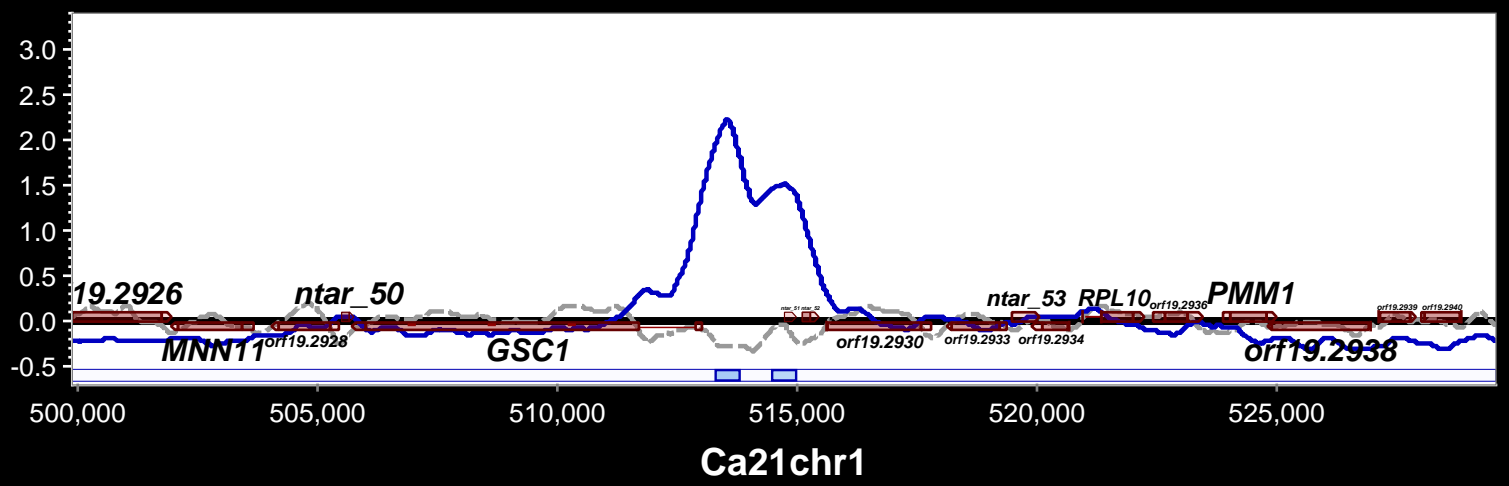

[1.501] Ca21chr6:555405-585088 [+] [MRT4, orf19.5549, orf19.5548, MIF2, orf19.5547]

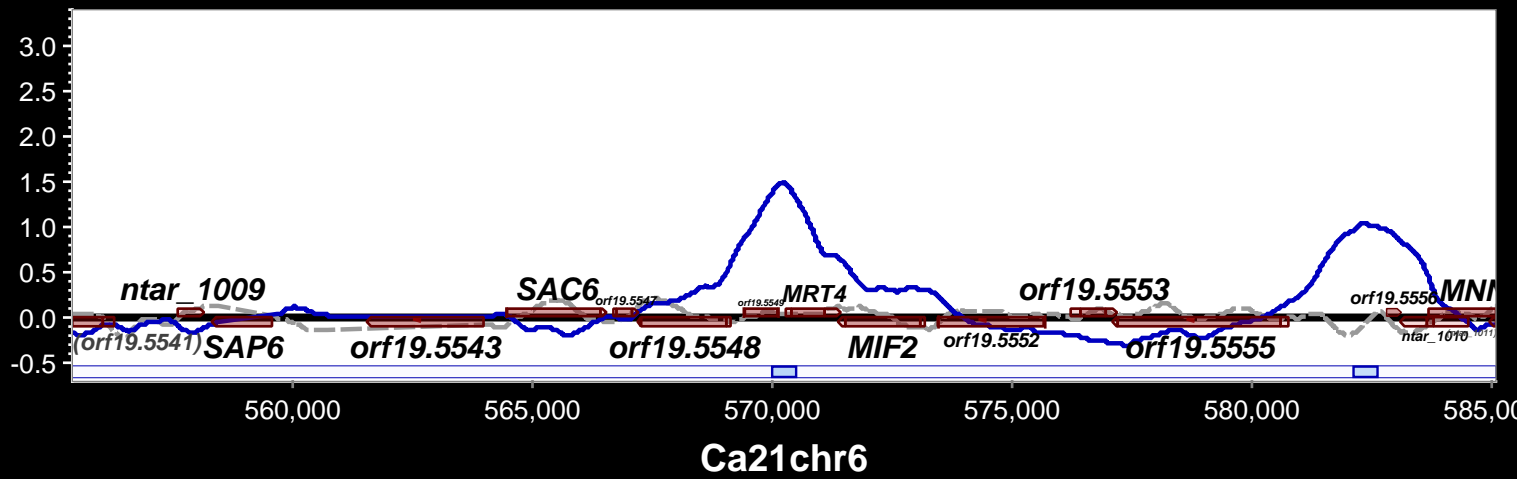

[1.495] Ca21chr1:2182321-2212004 [+] [DBP3, SFU1, ERO1, SWE1, orf19.4872]

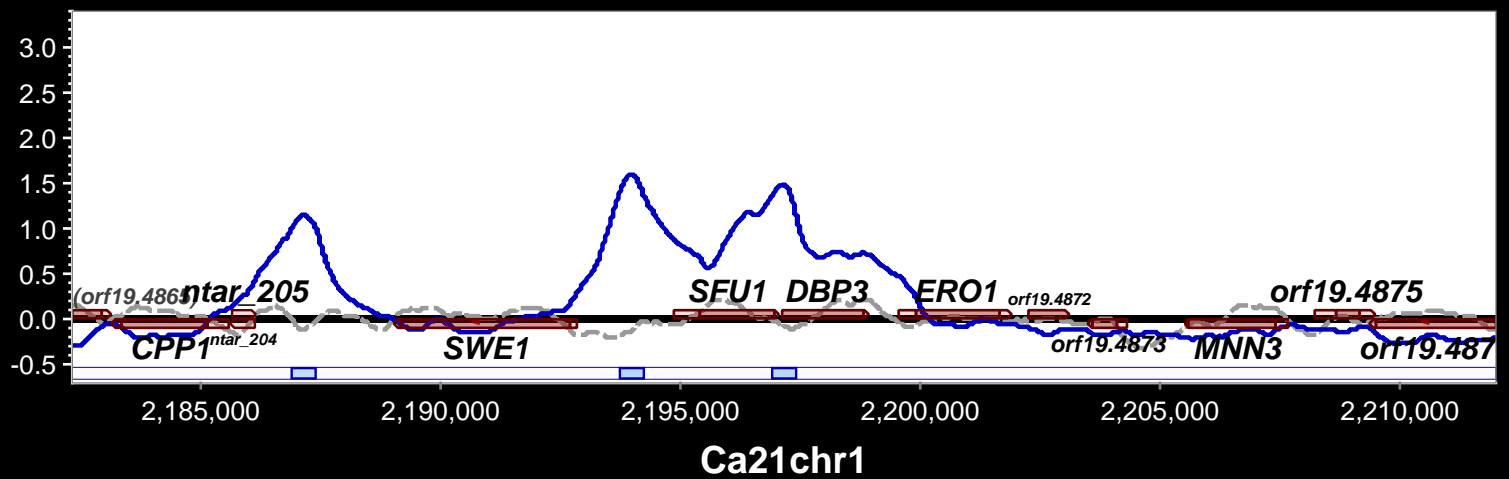

[1.495] Ca21chr1:2977911-3007594 [+] [orf19.4998, KIS2, CYB2, orf19.4996, CUP2]

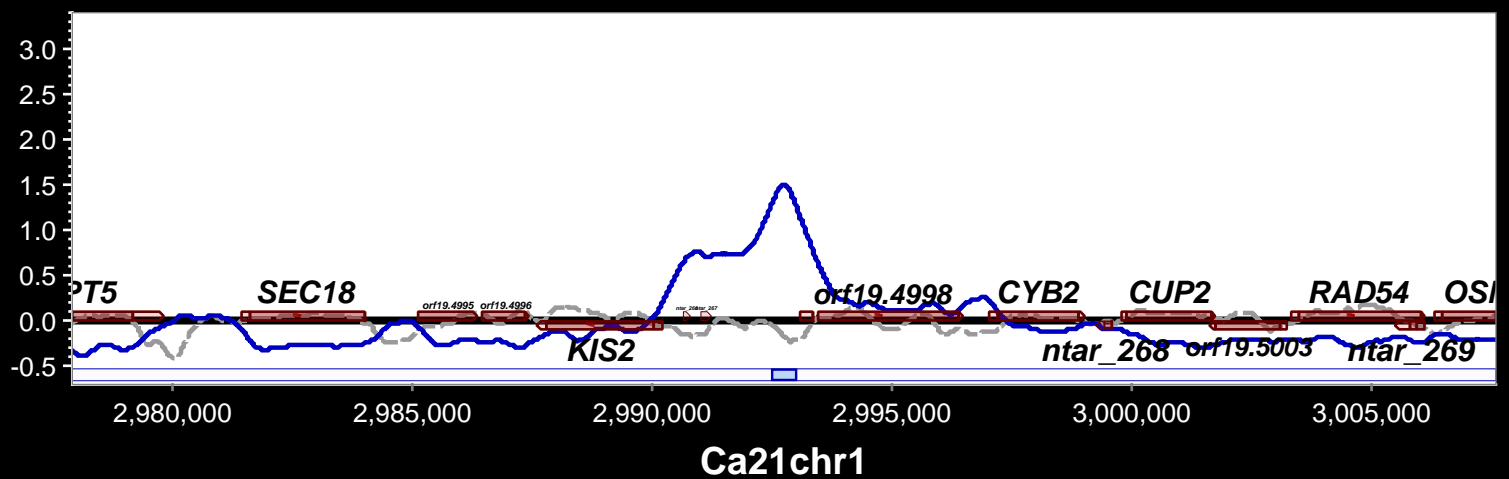

[1.491] Ca21chr1:253225-282908 [+] [orf19.3325, RPS21B, TIF, TRM2, orf19.3323]

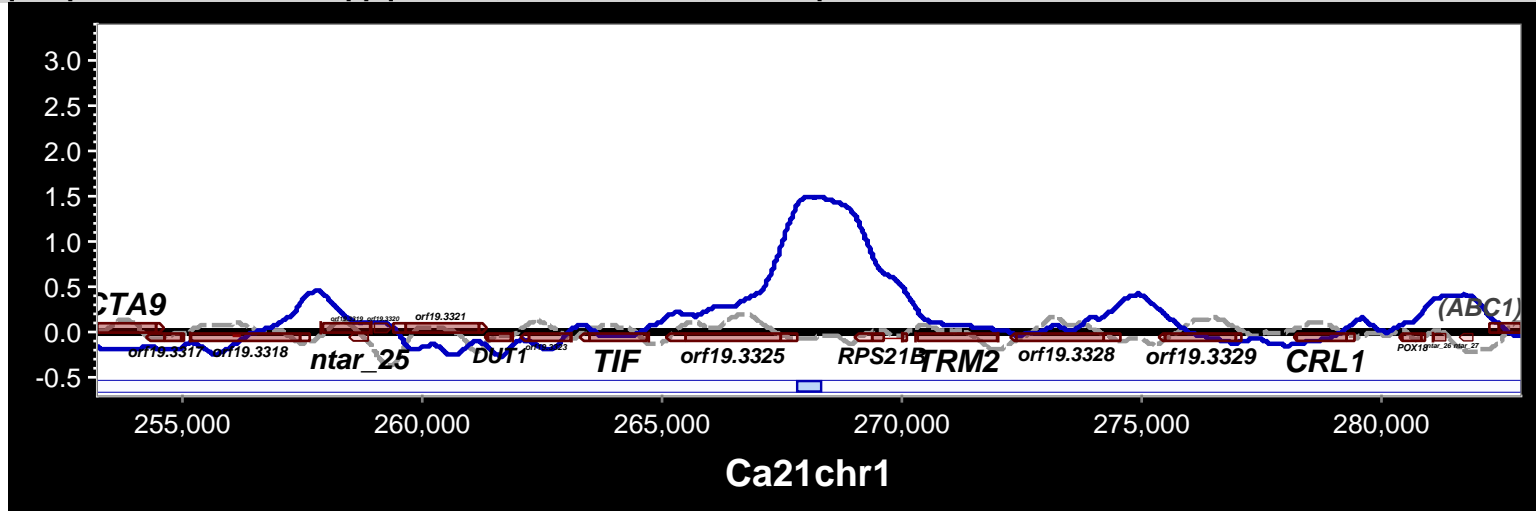

[1.484] Ca21chr3:1203144-1232827 [+] [orf19.6983, orf19.6982, orf19.6984, orf19.6981, TEA1]

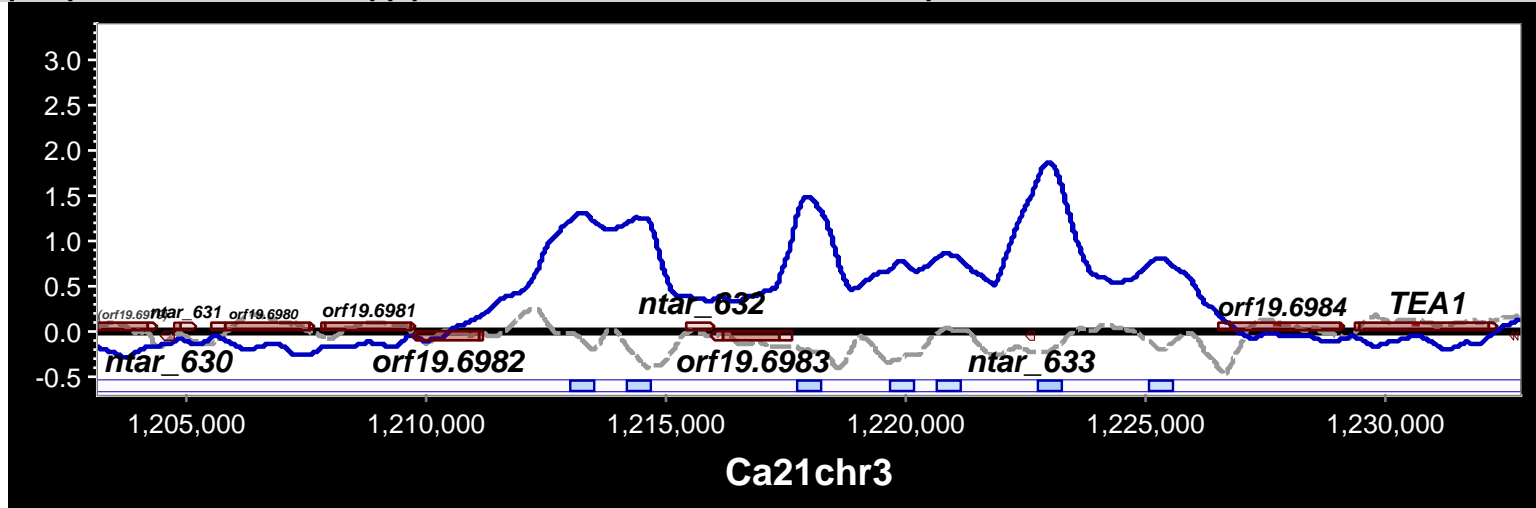

[1.48] Ca21chr4:827773-857456 [+] [PYC2, orf19.787, orf19.787.1, orf19.1207, orf19.789.1]

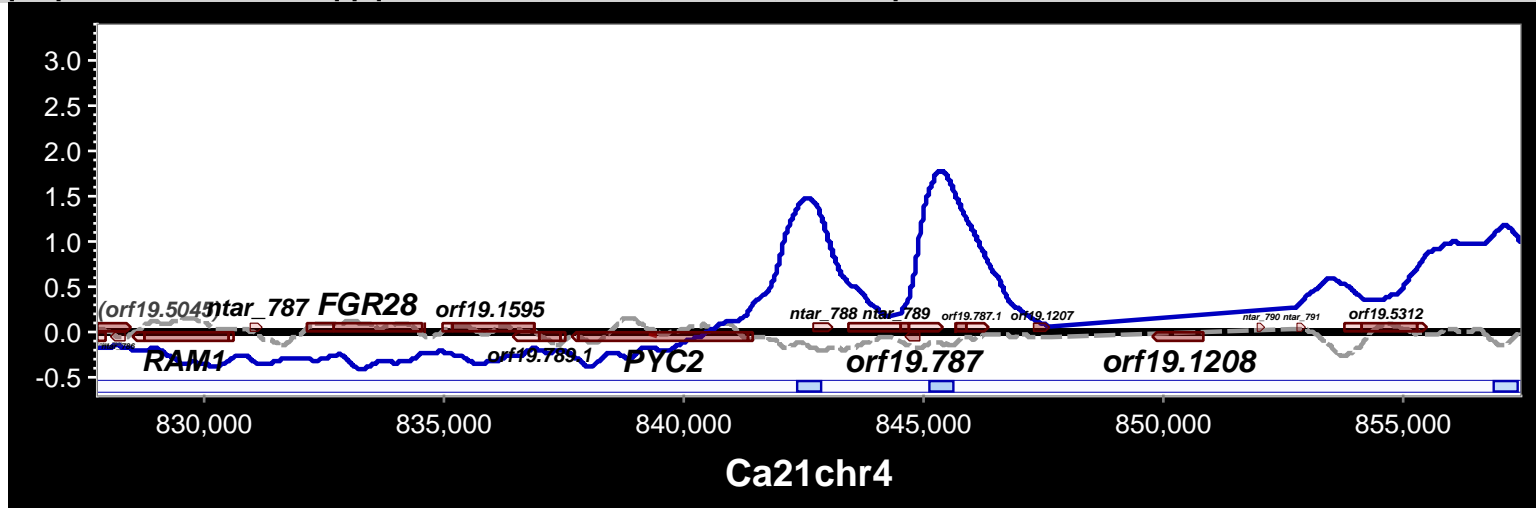

[1.478] Ca21chr3:10166-39849 [+] [DAL1, orf19.5451, orf19.5450, orf19.5455, orf19.5449]

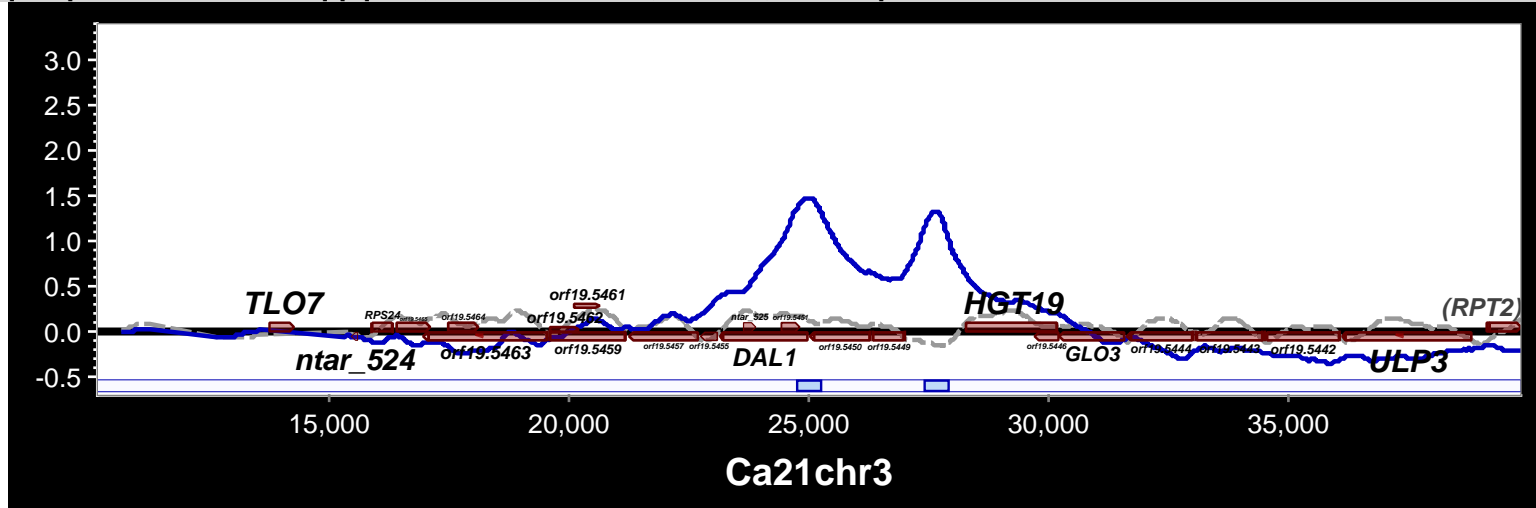

[1.475] Ca21chr6:775654-805337 [+] [ALS1, ALS9, ALS5, orf19.5735.3, CDC50]

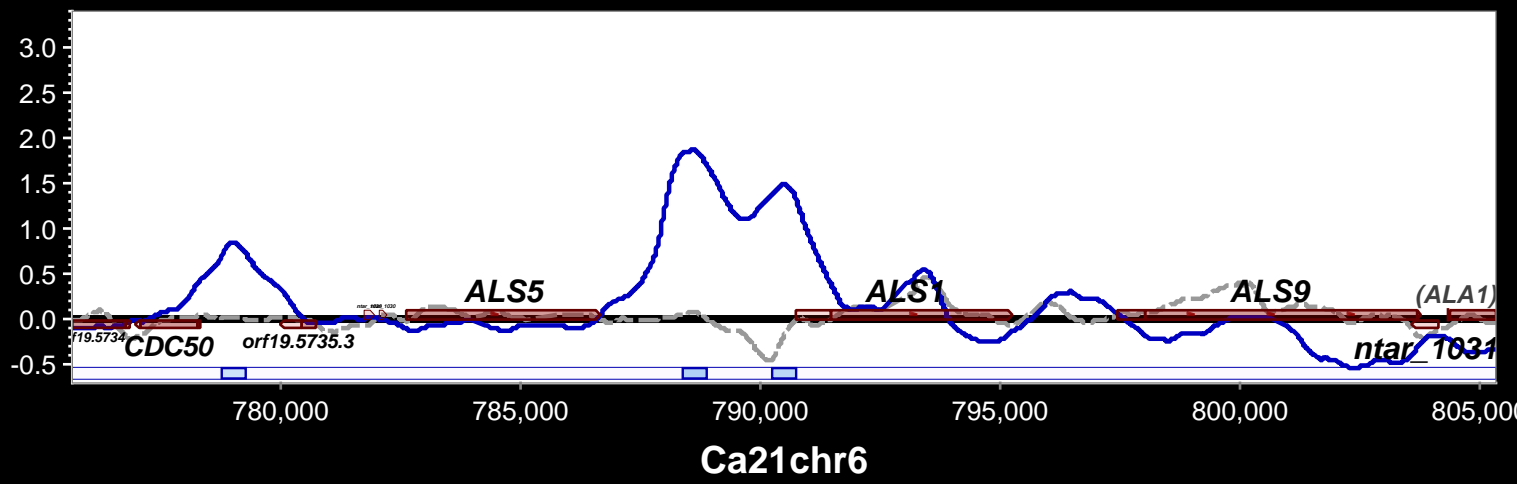

[1.473] Ca21chr3:795842-825525 [+] [SAP9, PEP8, orf19.6929, CSC25, SOL1]

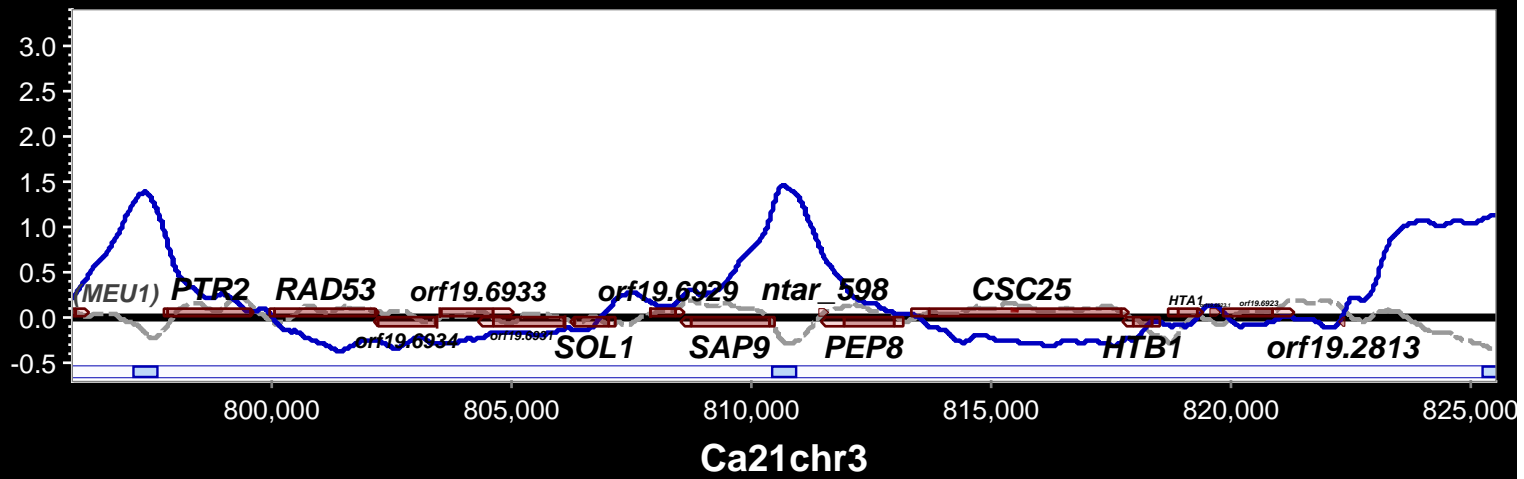

[1.473] Ca21chr6:398244-427927 [+] [GPD2, orf19.692, PLB2, orf19.3508, MCR1]

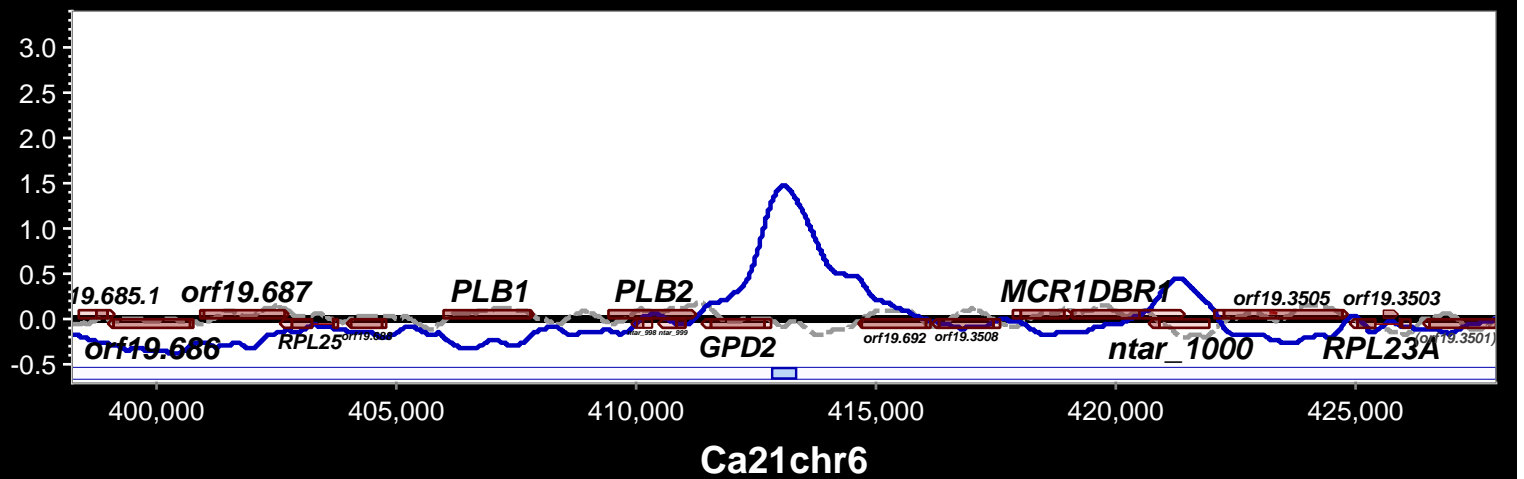

[1.469] Ca21chrR:576235-605918 [+] [orf19.2822, orf19.2821, orf19.2820, RFG1, orf19.2819]

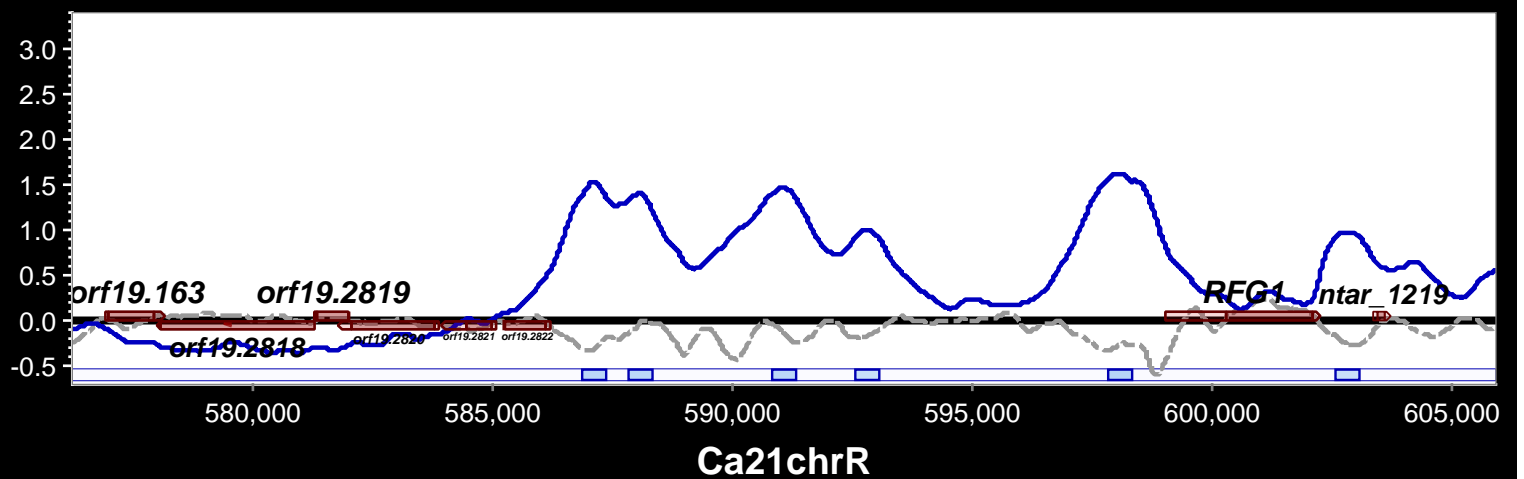

[1.468] Ca21chr3:694881-724564 [+] [orf19.334, orf19.335, FCY2, tE(UUC)1, orf19.332.1]

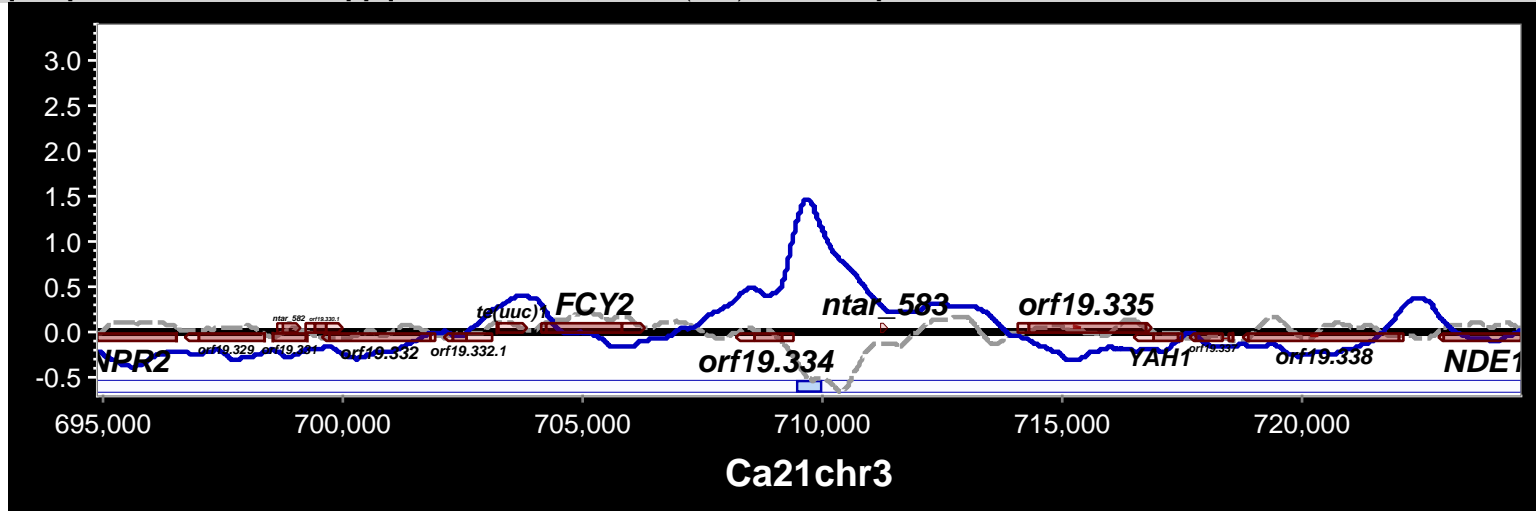

[1.467] Ca21chr2:766423-796106 [+] [orf19.850, orf19.851, orf19.849, SAP98, SAP99]

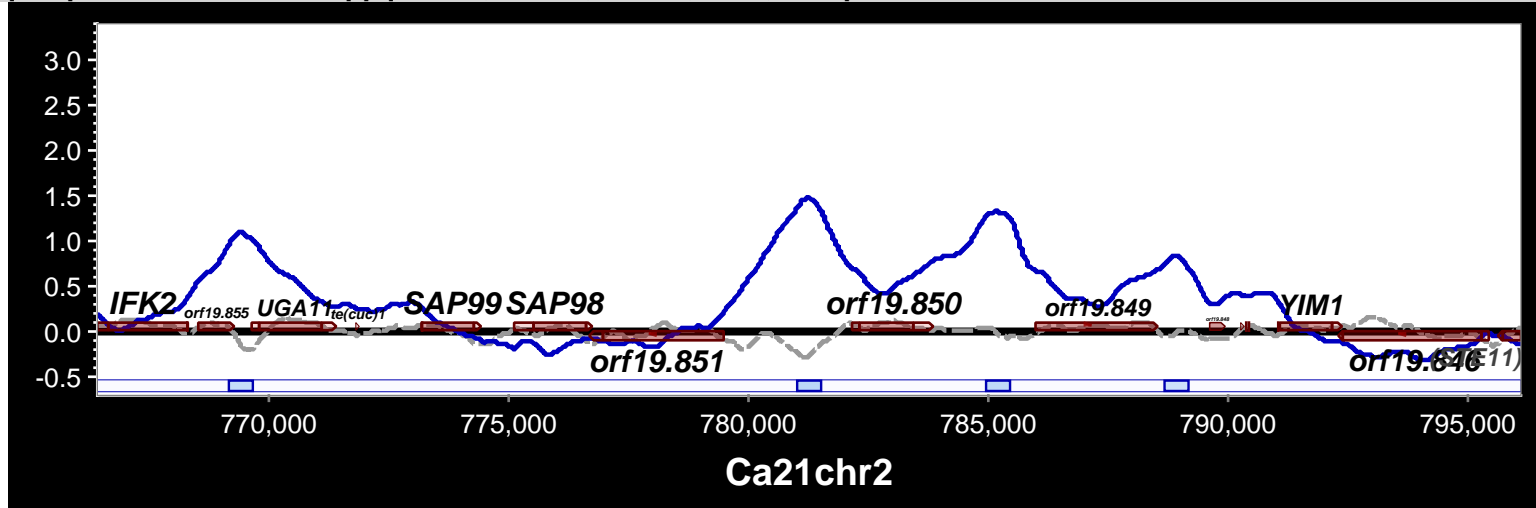

[1.466] Ca21chr5:1036716-1066399 [+] [orf19.3968, orf19.3969, orf19.3970, orf19.3971, orf19.3972]

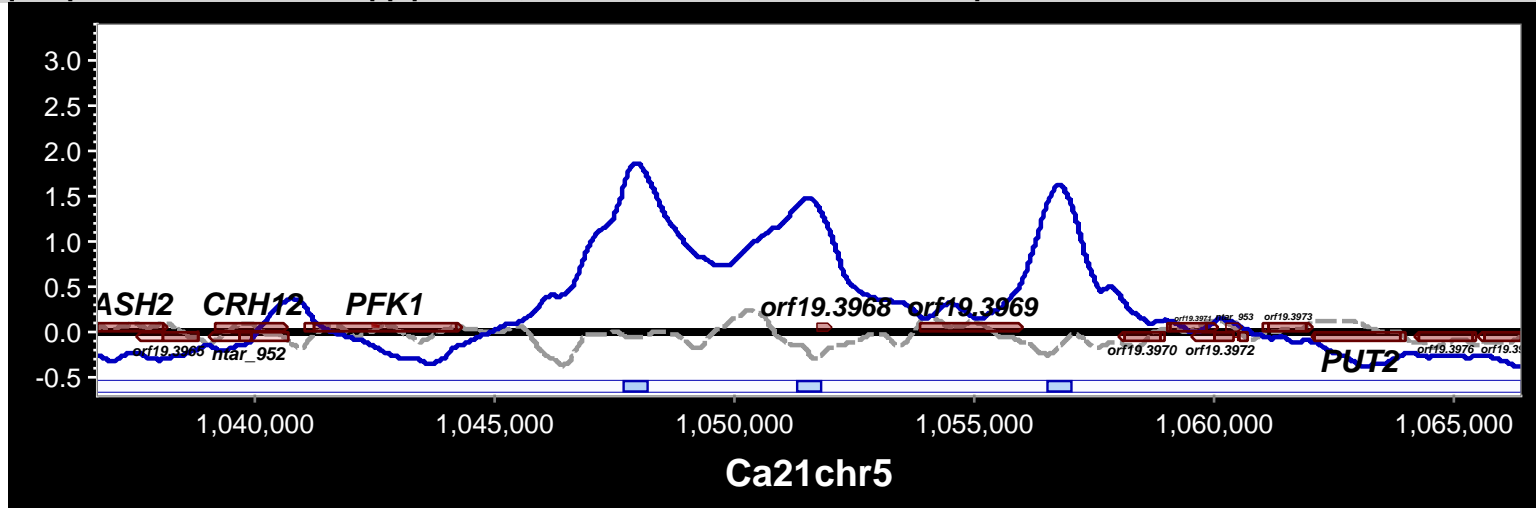

[1.462] Ca21chr2:646873-676556 [+] [STP4, FEN12, orf19.909.1, orf19.910, TOM1]

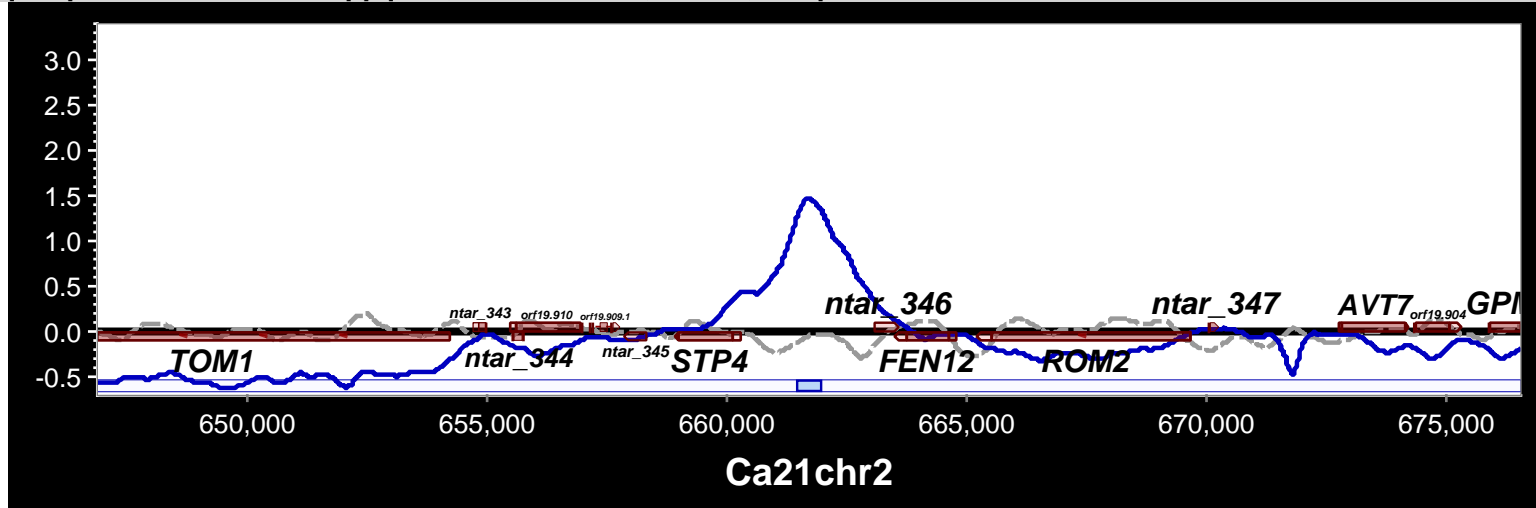

[1.461] Ca21chr3:1744135-1773818 [+] [orf19.6715, orf19.6713, ABD1, orf19.6717, orf19.6718]

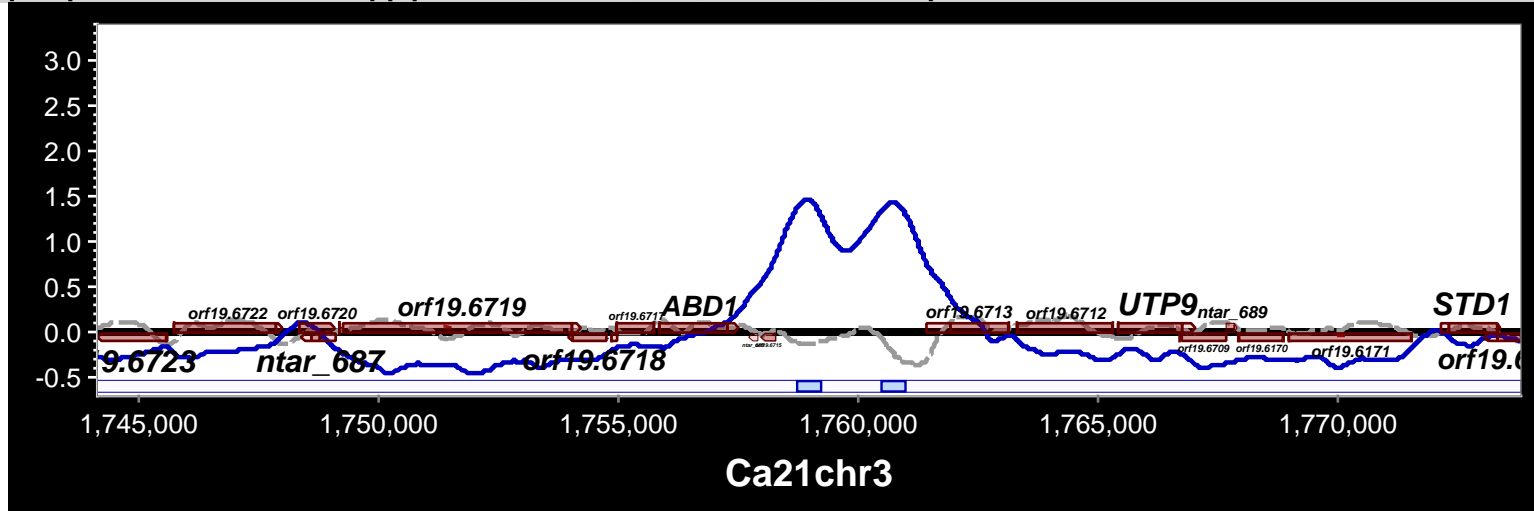

[1.46] Ca21chr3:988529-1018212 [+] [orf19.5933, orf19.5934, orf19.5935, orf19.5932, orf19.5931]

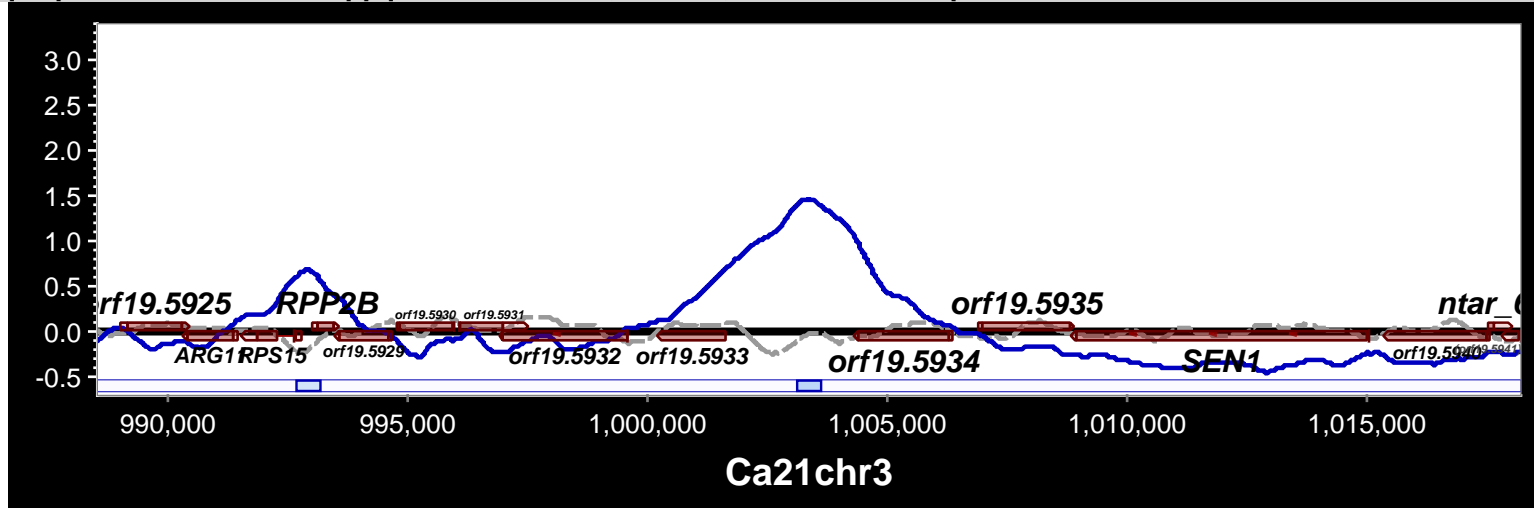

[1.459] Ca21chr2:2069367-2099050 [+] [orf19.1766, orf19.1767, orf19.1765, orf19.1768, orf19.1764]

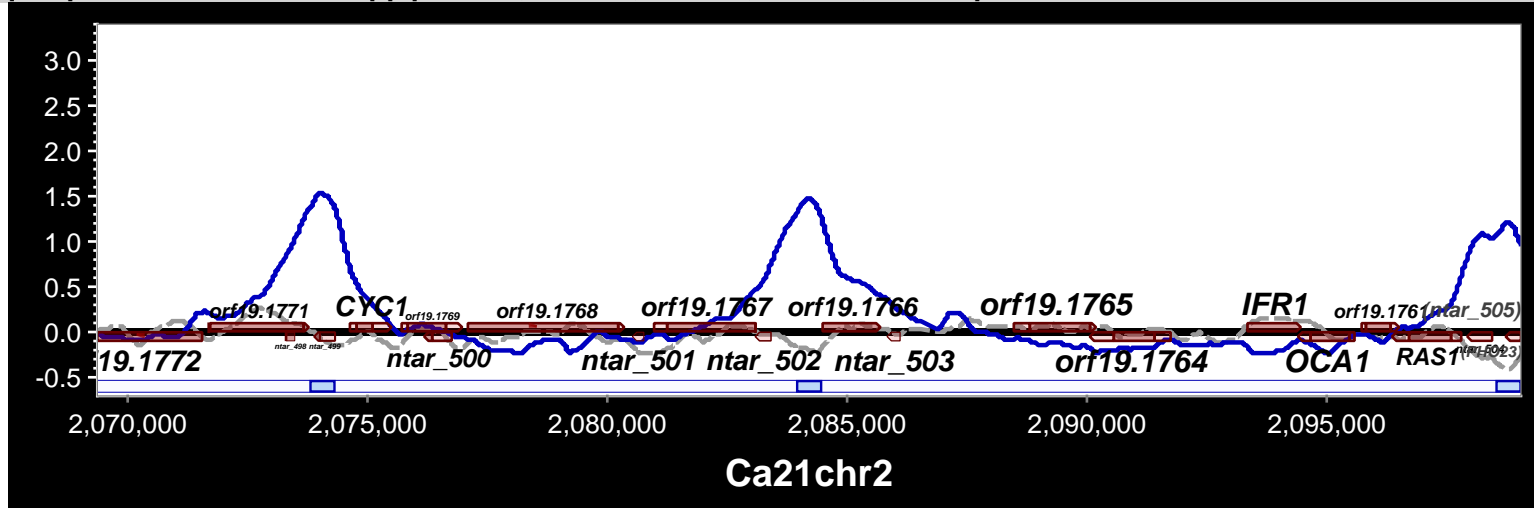

[1.439] Ca21chr1:1563107-1592790 [+] [RME1, orf19.4437, orf19.4436, tL(AAG)2, orf19.4435]

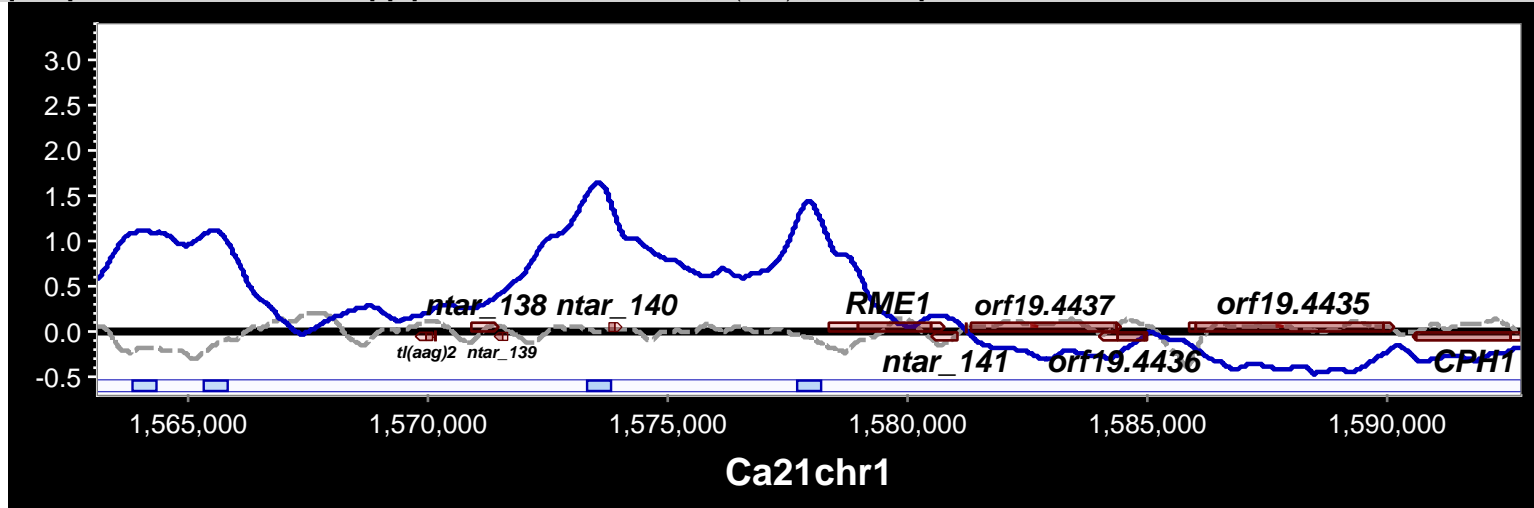

[1.439] Ca21chr1:3120064-3149747 [+] [FTR2, IML2, IRR1, orf19.7234, orf19.7228]

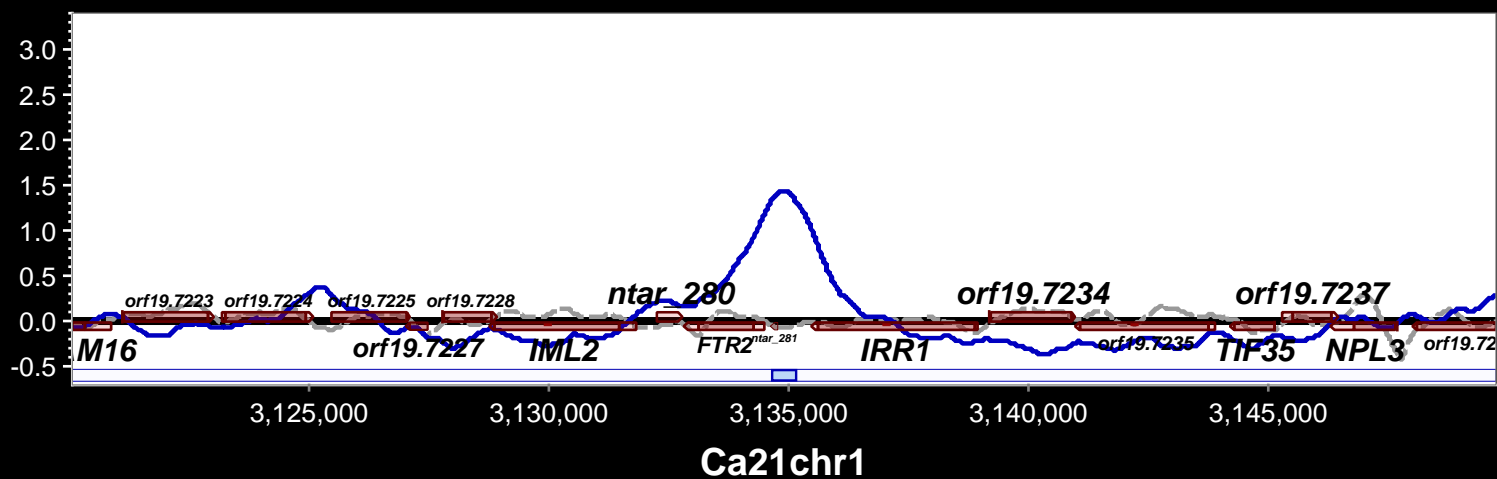

[1.437] Ca21chr5:482682-512365 [+] [PTH2, orf19.4230, PTH1, THR4, orf19.4229]

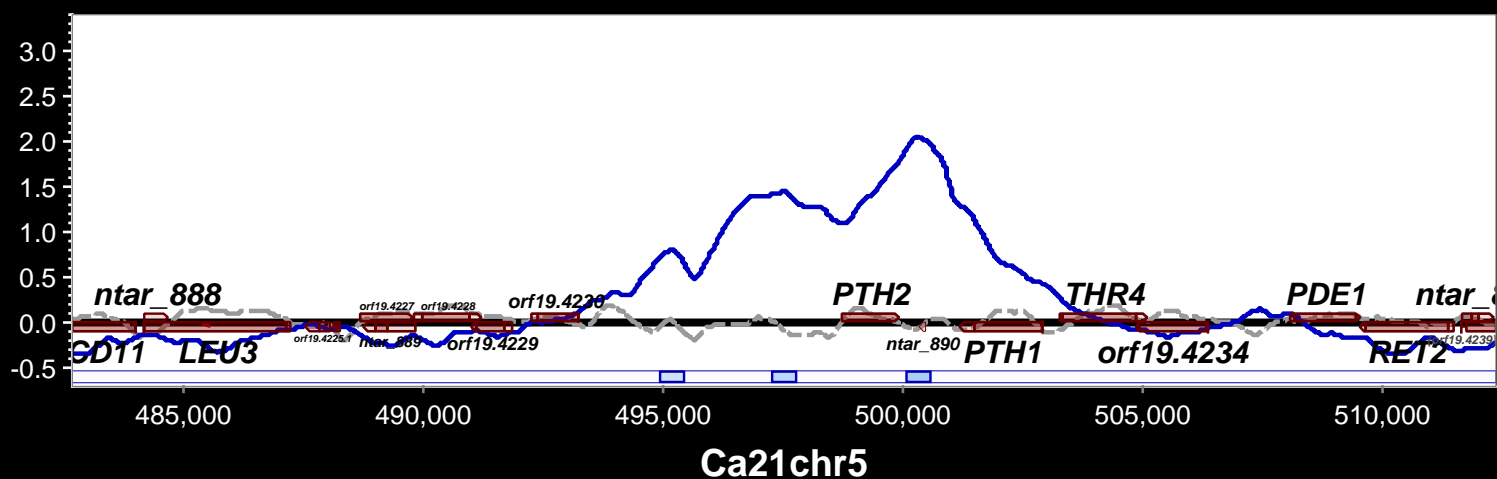

[1.434] Ca21chr3:921314-950997 [+] [RAS2, RAX1, PKC1, RPL19A, orf19.5905]

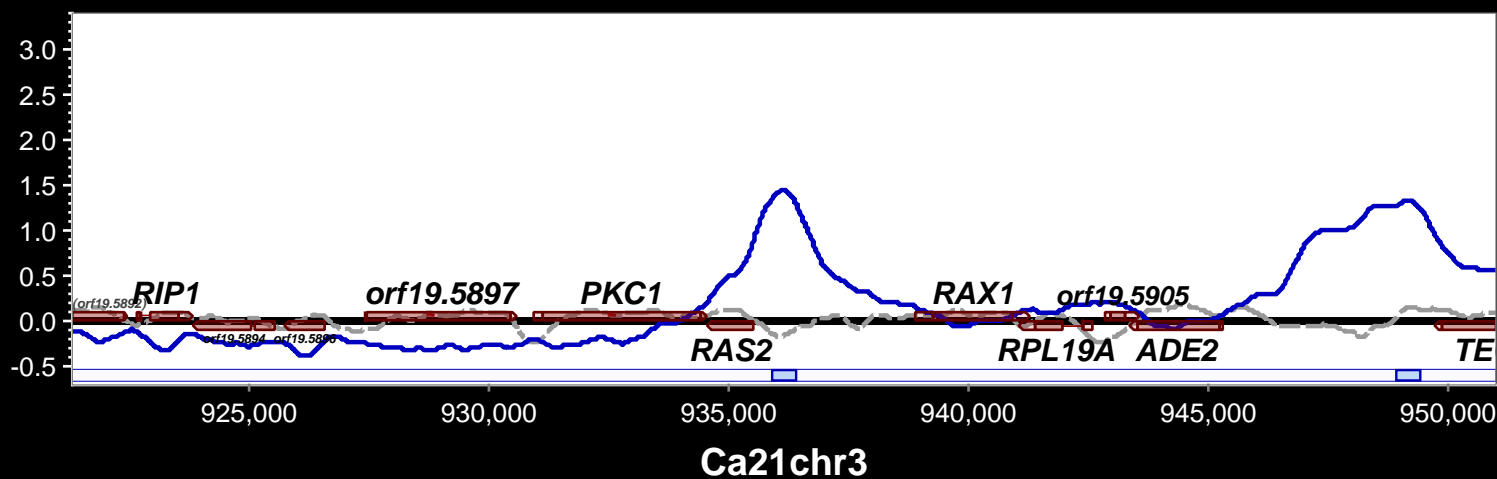

[1.433] Ca21chr2:358431-388114 [+] [ROD1, orf19.1510, orf19.1508, orf19.1507, orf19.1505]

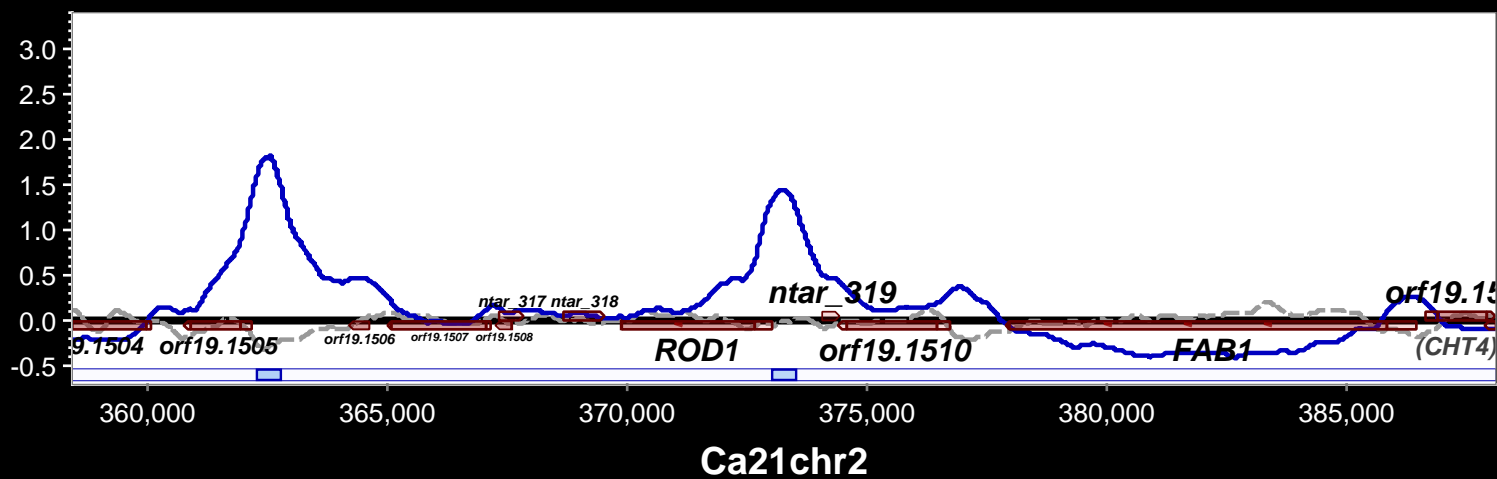

[1.431] Ca21chr4:257950-287633 [+] [orf19.4653, orf19.4654, OPT6, orf19.4652, PGA53]

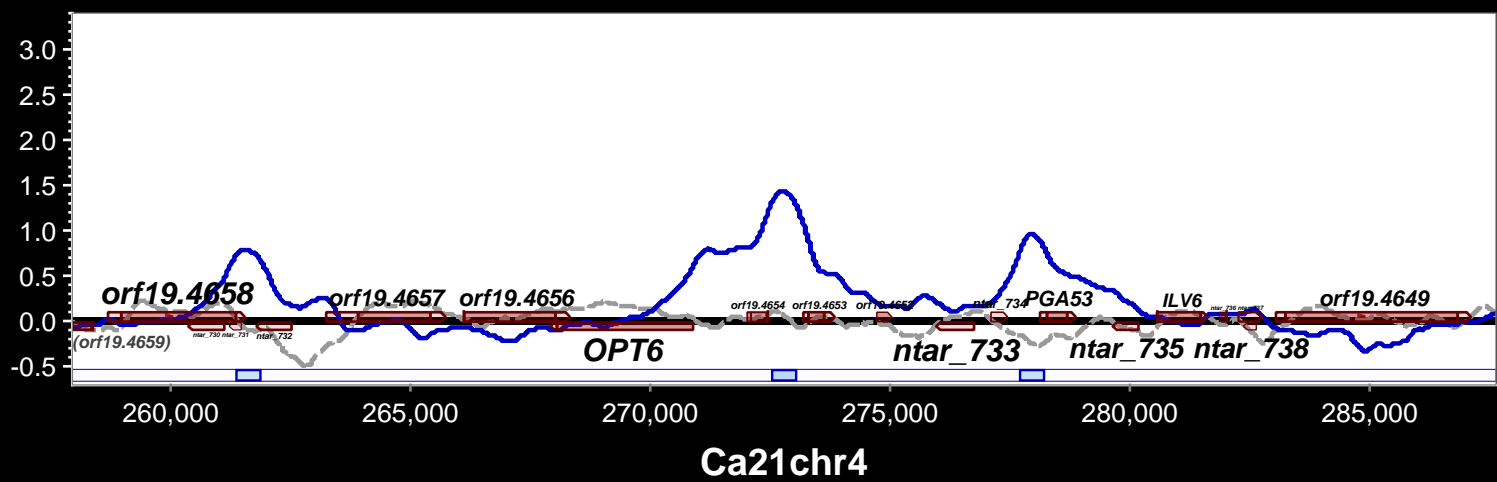

[1.429] Ca21chr1:335788-365471 [+] [orf19.3360, tA(AGC)3, ARP8, CTN1, LSC1]

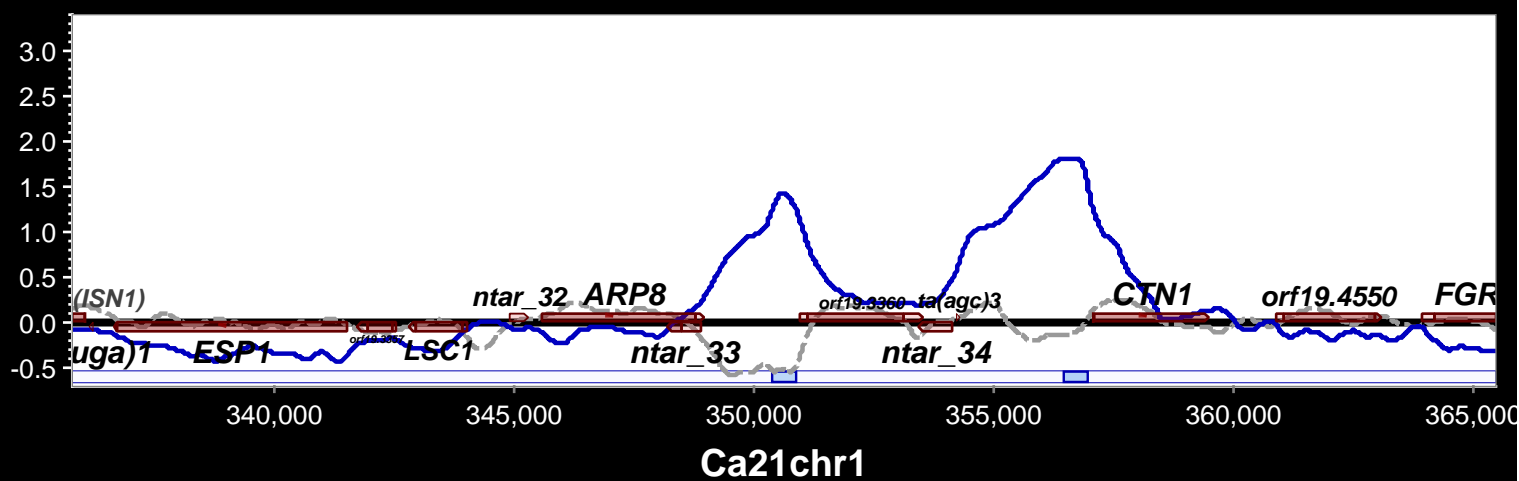

[1.427] Ca21chr7:419417-449100 [+] [orf19.6520, orf19.6522, orf19.6518, RAD14, HSP90]

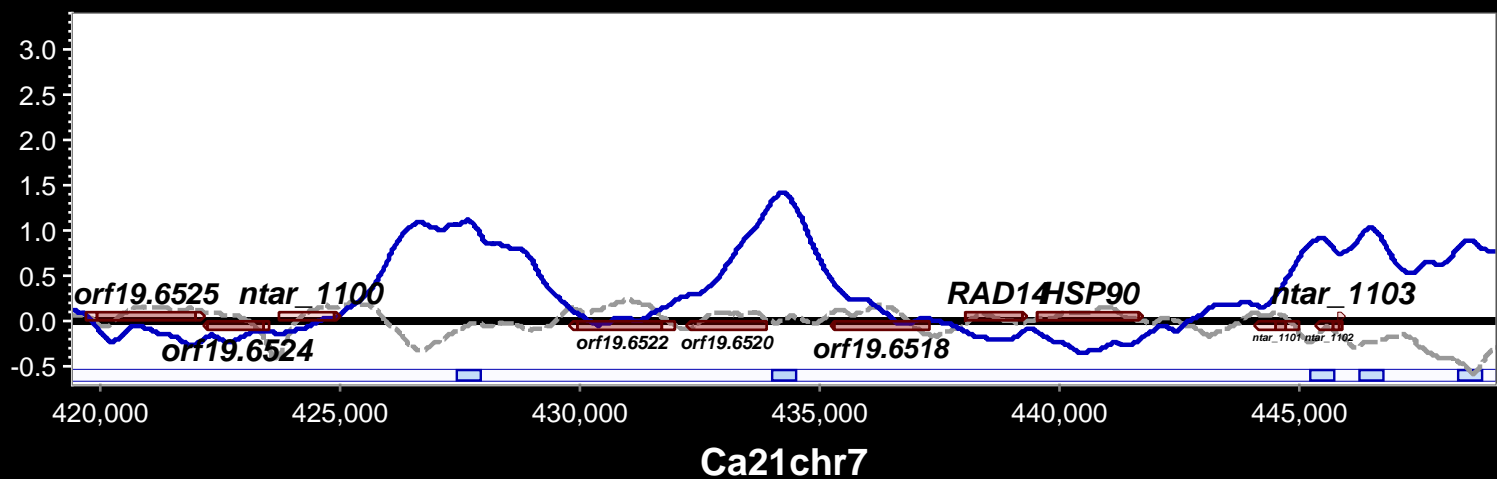

[1.426] Ca21chr3:841735-871418 [+] [SBP1, orf19.913.2, orf19.5854.1, CDR11, MBP1]

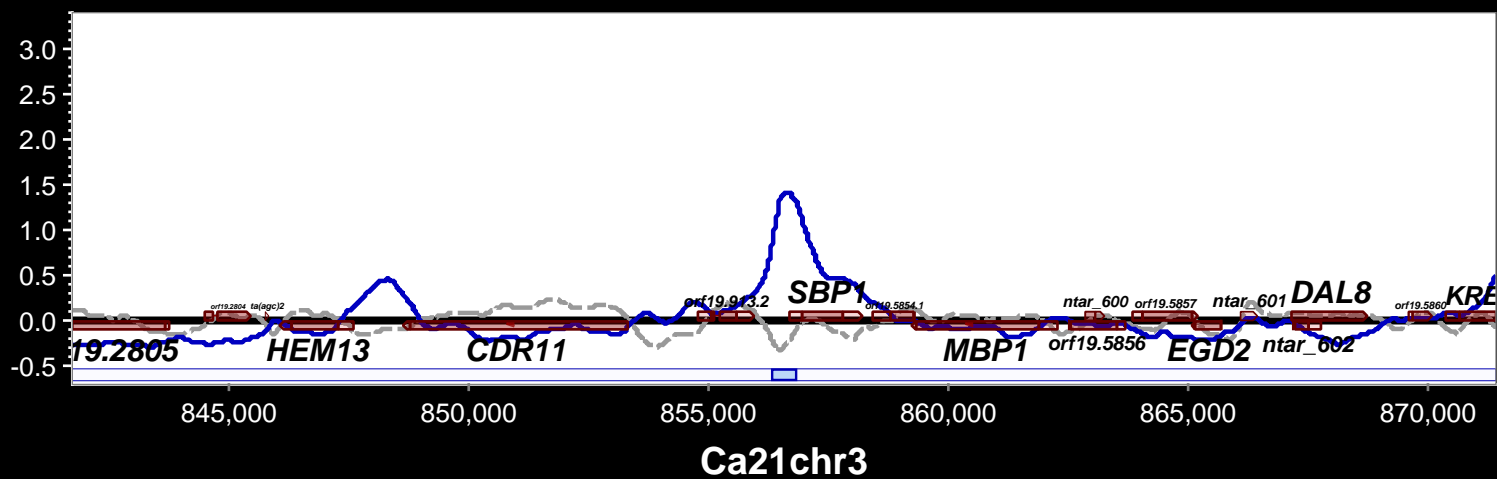



[1.425] Ca21chr2:1993531-2023214 [+] [orf19.1368, orf19.1369, orf19.1367.1, MTW1, orf19.1370]

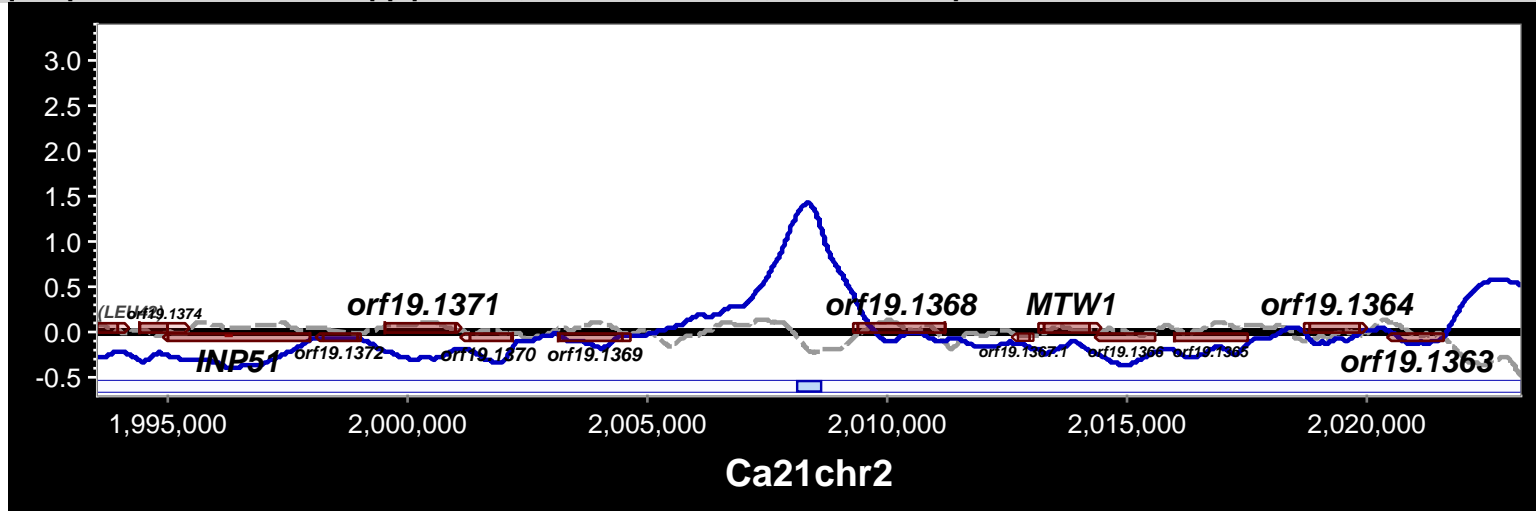

[1.422] Ca21chr4:703898-733581 [+] [MOH1, DOT4, orf19.3368, orf19.3371, orf19.3367]

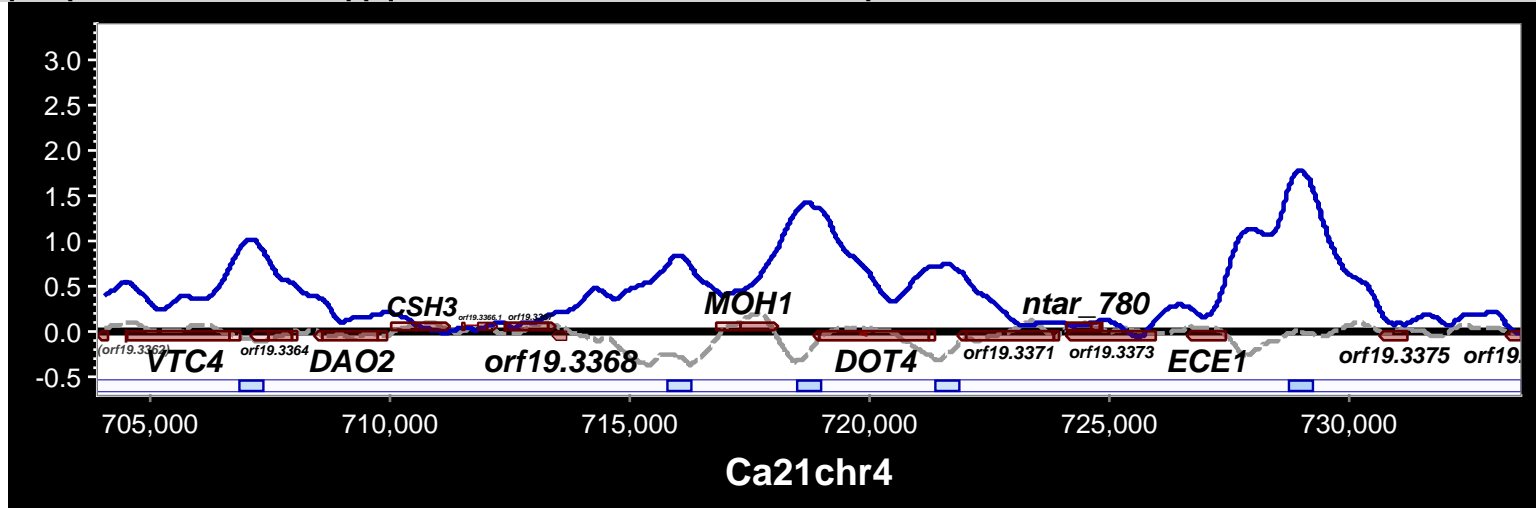

[1.421] Ca21chr3:1745894-1775577 [+] [orf19.6713, orf19.6715, orf19.6712, UTP9, ABD1]

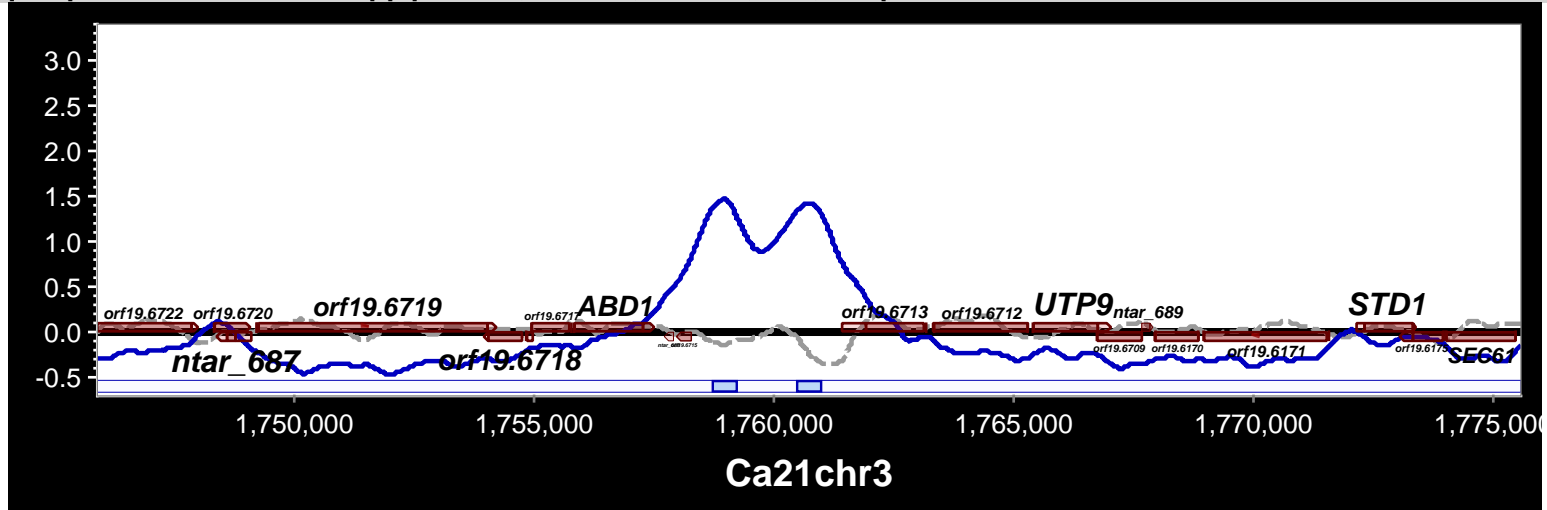

[1.42] Ca21chr2:1391495-1421178 [+] [LTE1, orf19.2237.1, SPR1, orf19.2236, PST1]

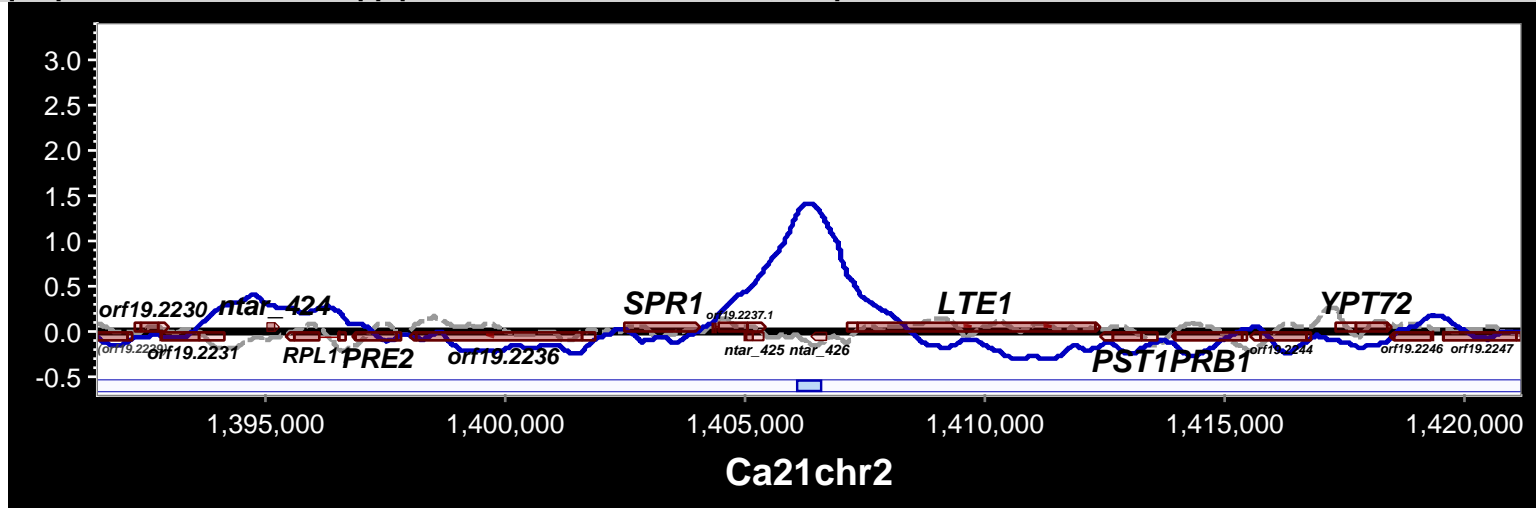

[1.415] Ca21chr4:921105-950788 [+] [orf19.1409.2, orf19.1409.1, VAC7, orf19.1409.3, orf19.1411]

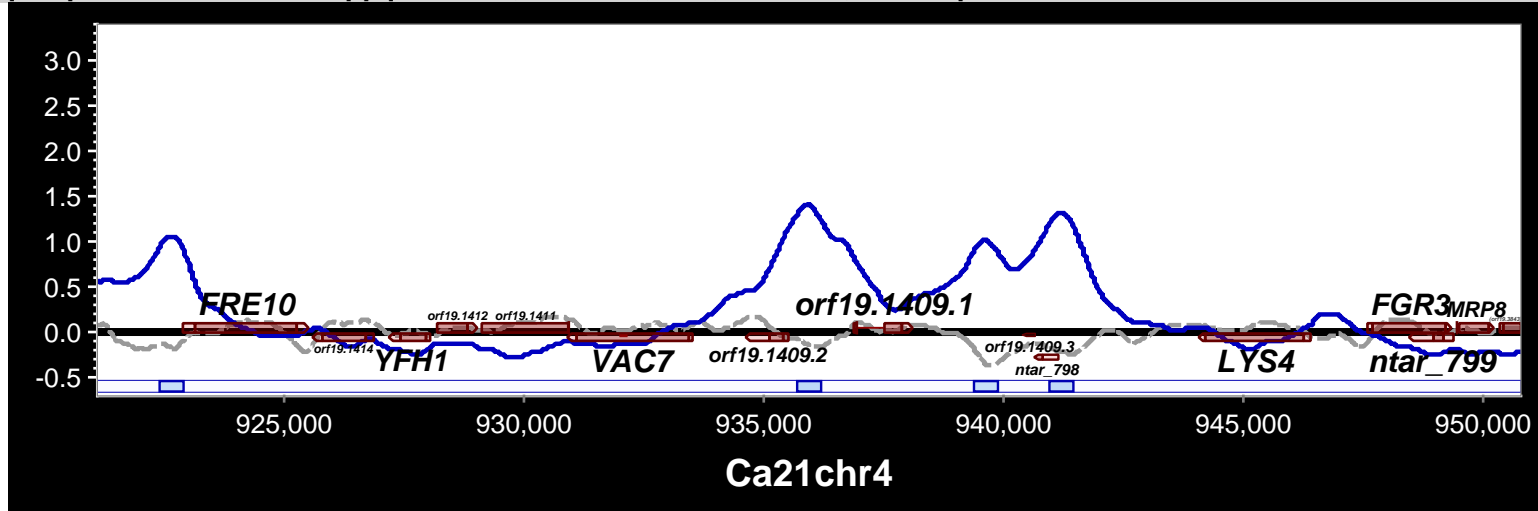

[1.414] Ca21chr5:633192-662875 [+] [orf19.4315, orf19.4316, GRE3, orf19.4312, MIG1]

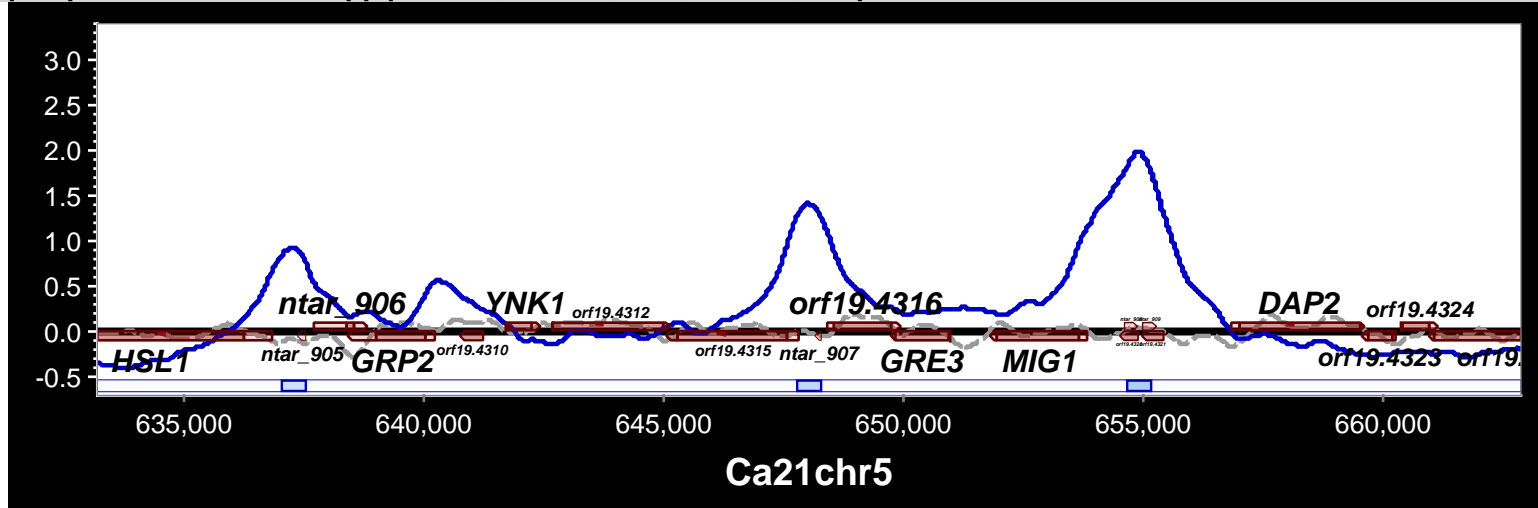

[1.41] Ca21chr1:3094542-3124225 [+] [RBE1, RPL4B, orf19.7216, orf19.7215.3, FTR1]

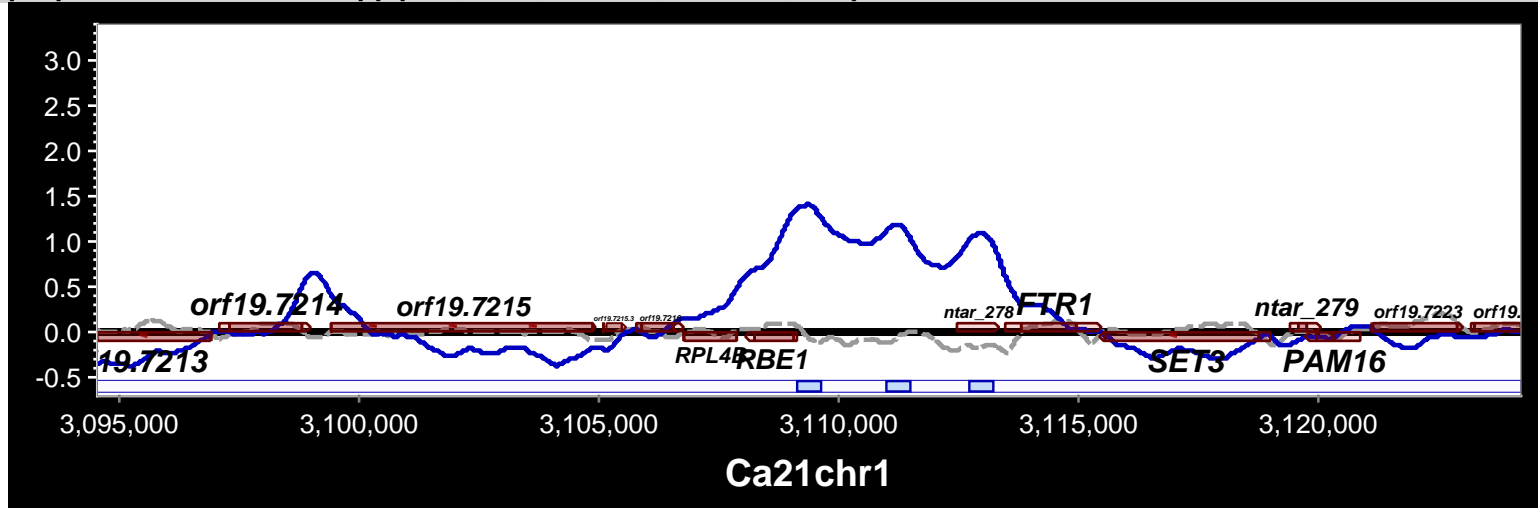

[1.409] Ca21chr3:402332-432015 [+] [orf19.1658, orf19.1656, ALG8, tK(UUU)1, DBP5]

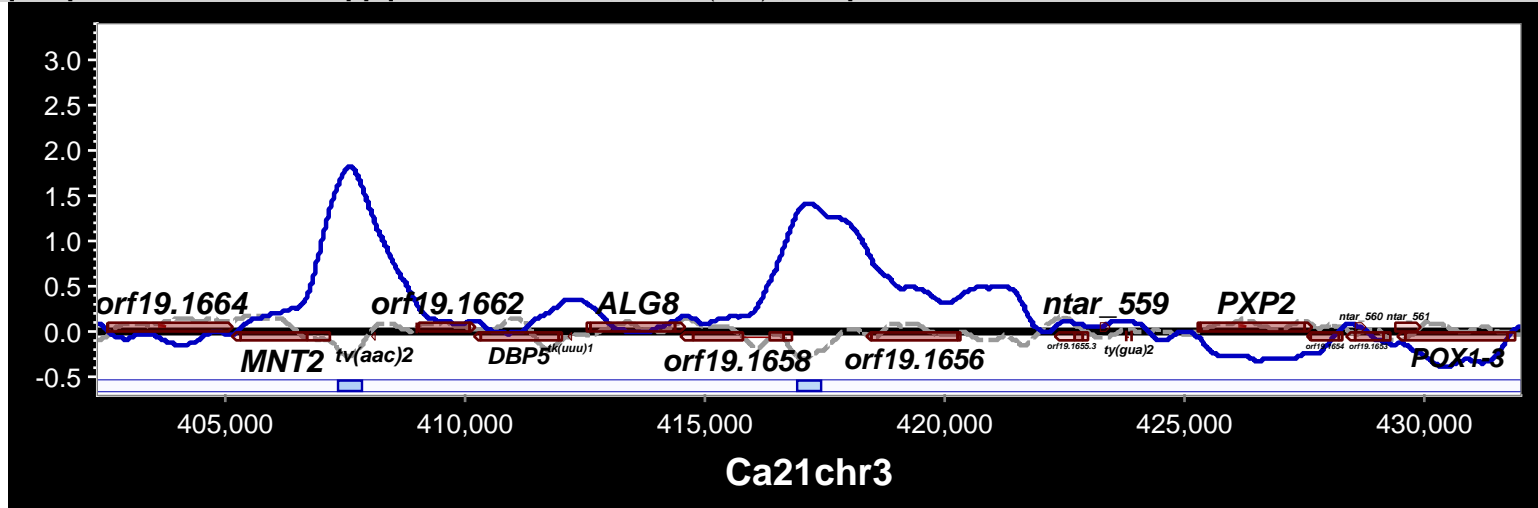

[1.409] Ca21chr6:579258-608941 [+] [RNH1, orf19.5564, RAV2, orf19.5565, STE23]

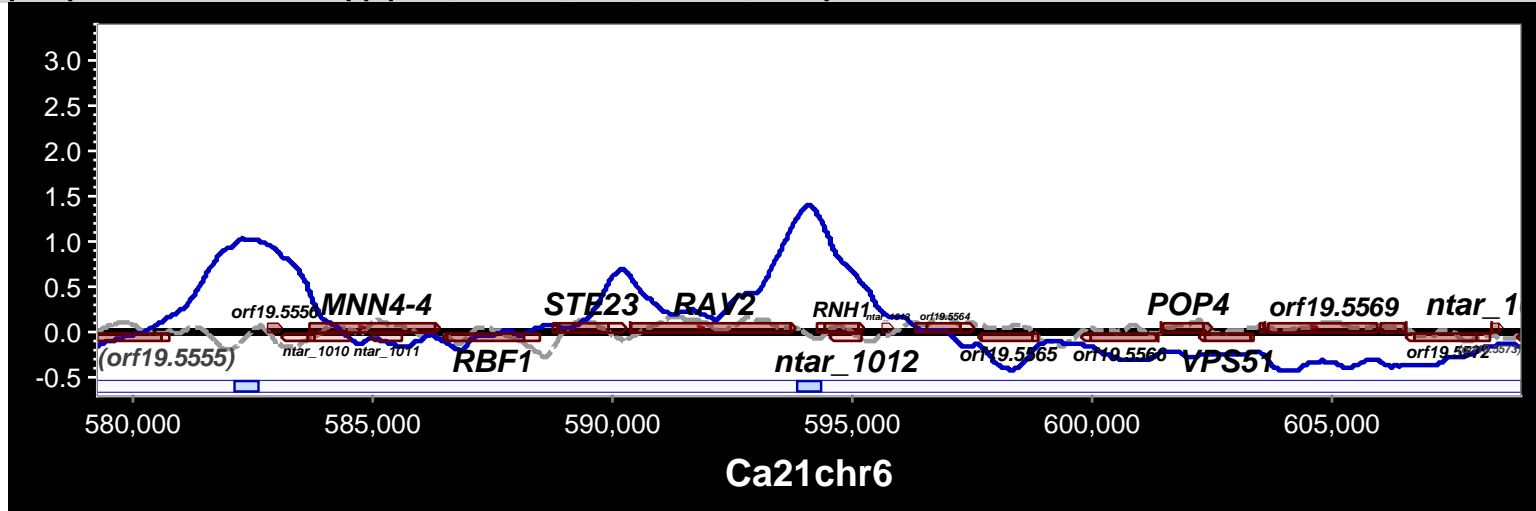

[1.4] Ca21chr5:772779-802462 [+] [orf19.6660, GAP6, orf19.6658, orf19.6661, DUR3]

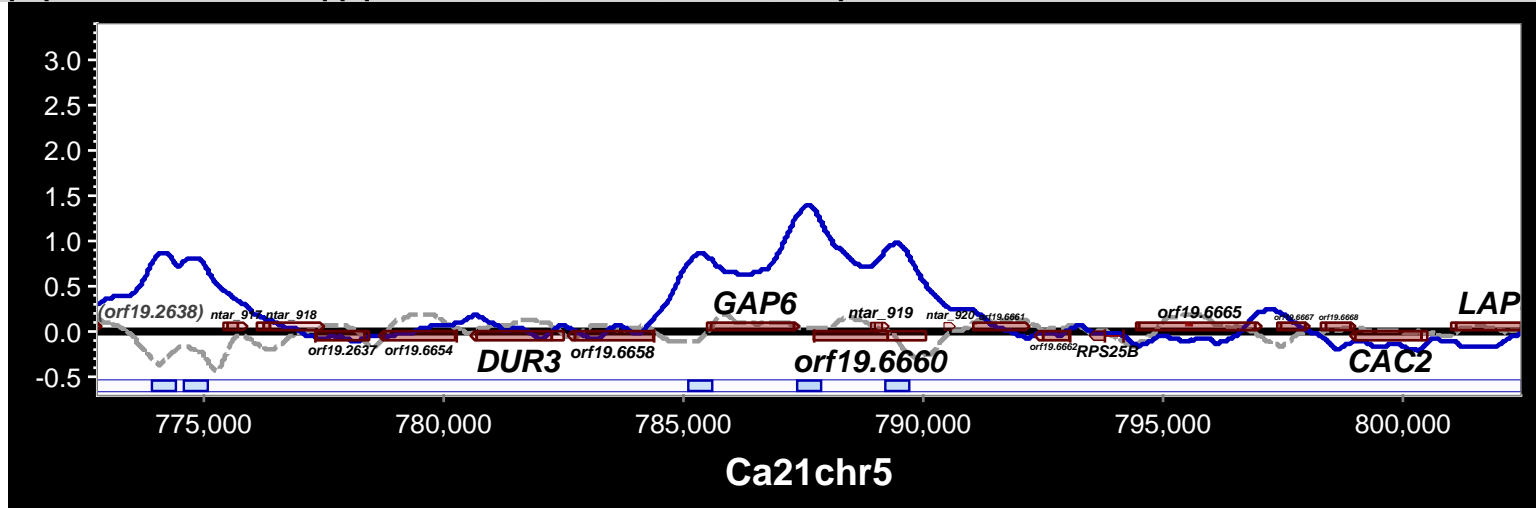

[1.4] Ca21chr6:535220-564903 [+] [orf19.5537, orf19.5539, orf19.5541, orf19.5536, orf19.5535]

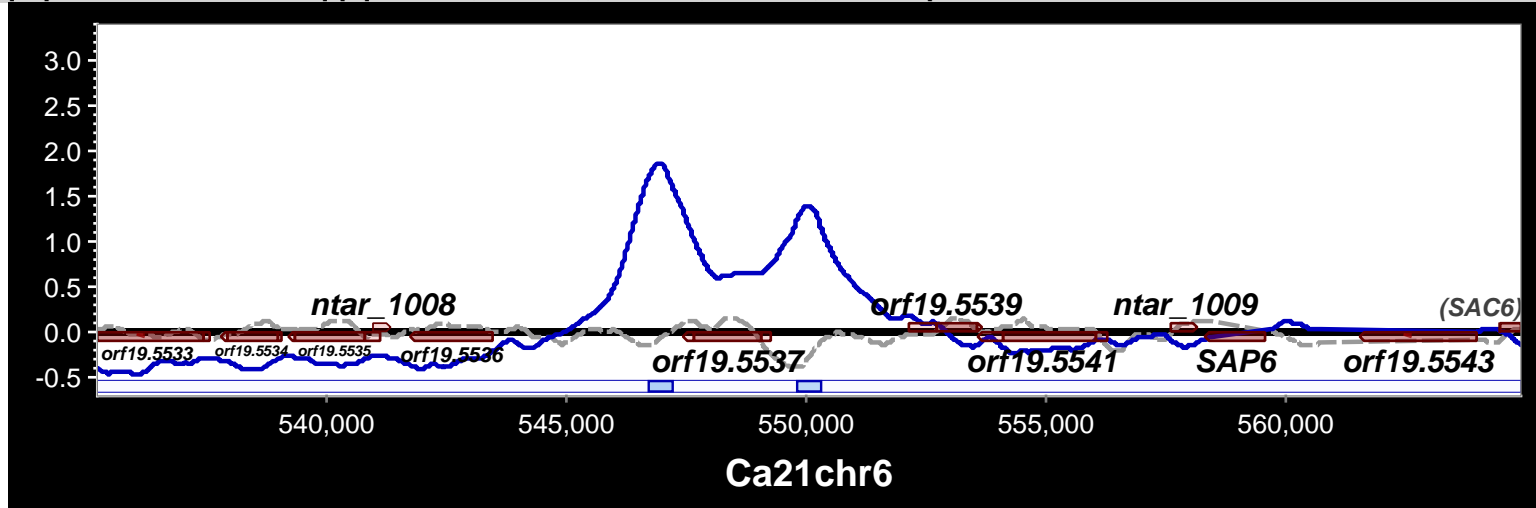

[1.4] Ca21chrR:715072-744755 [+] [orf19.2398, orf19.2399, orf19.2397.3, orf19.2397, orf19.2400]

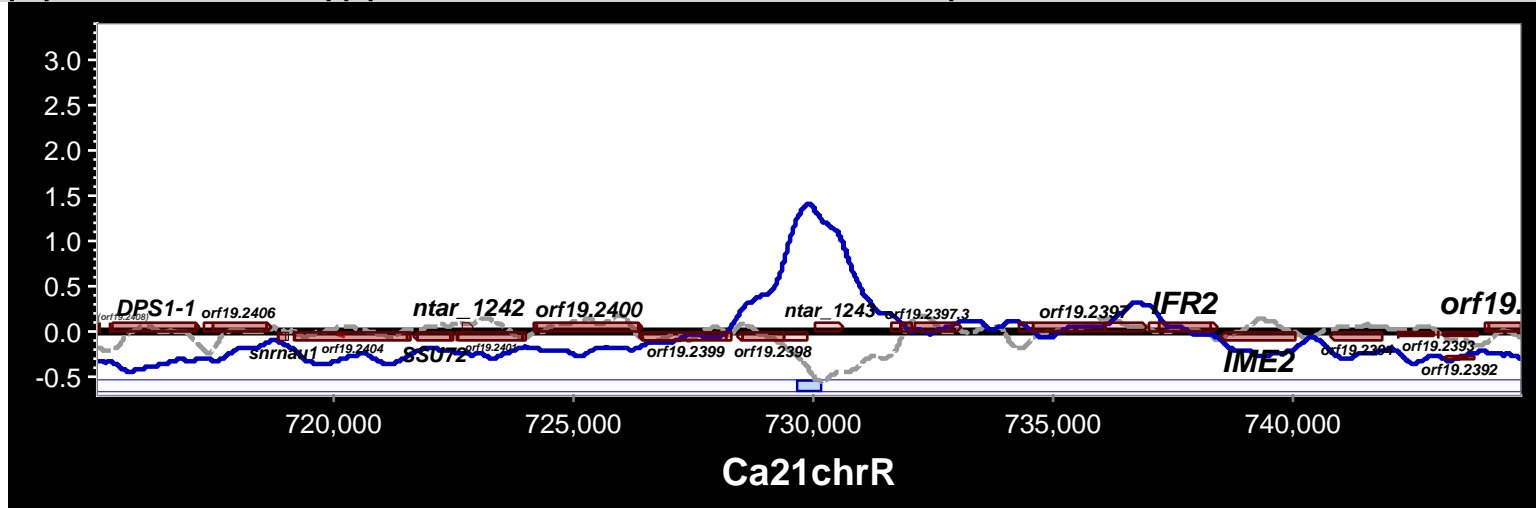

[1.398] Ca21chrR:1563353-1593036 [+] [CLG1, orf19.6147, orf19.6148, orf19.6143, orf19.6142]

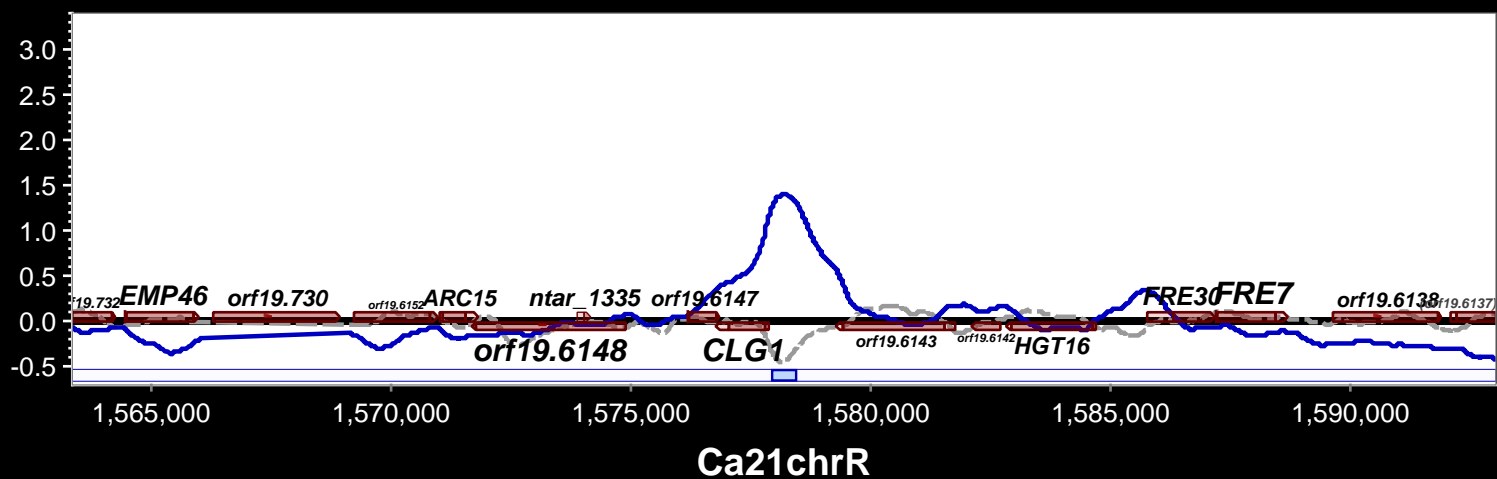

[1.395] Ca21chrR:573241-602924 [+] [orf19.2822, orf19.2821, orf19.2820, orf19.2819, orf19.2818]

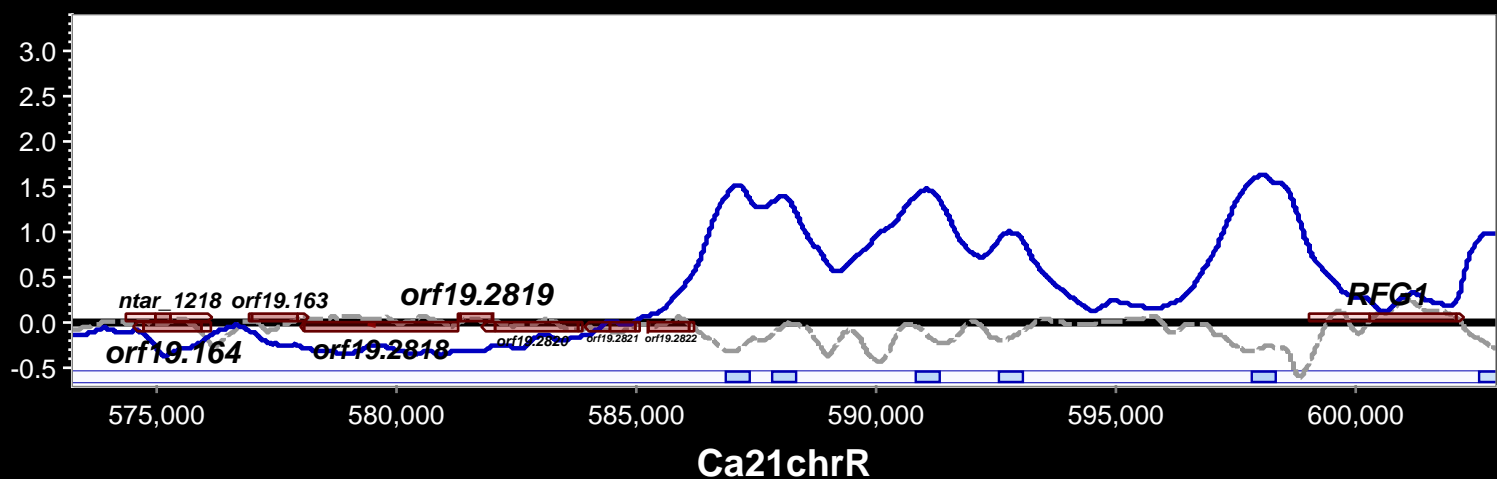

[1.388] Ca21chr1:1303718-1333401 [+] [UME6, orf19.1821, orf19.1823, PGA50, orf19.1825]

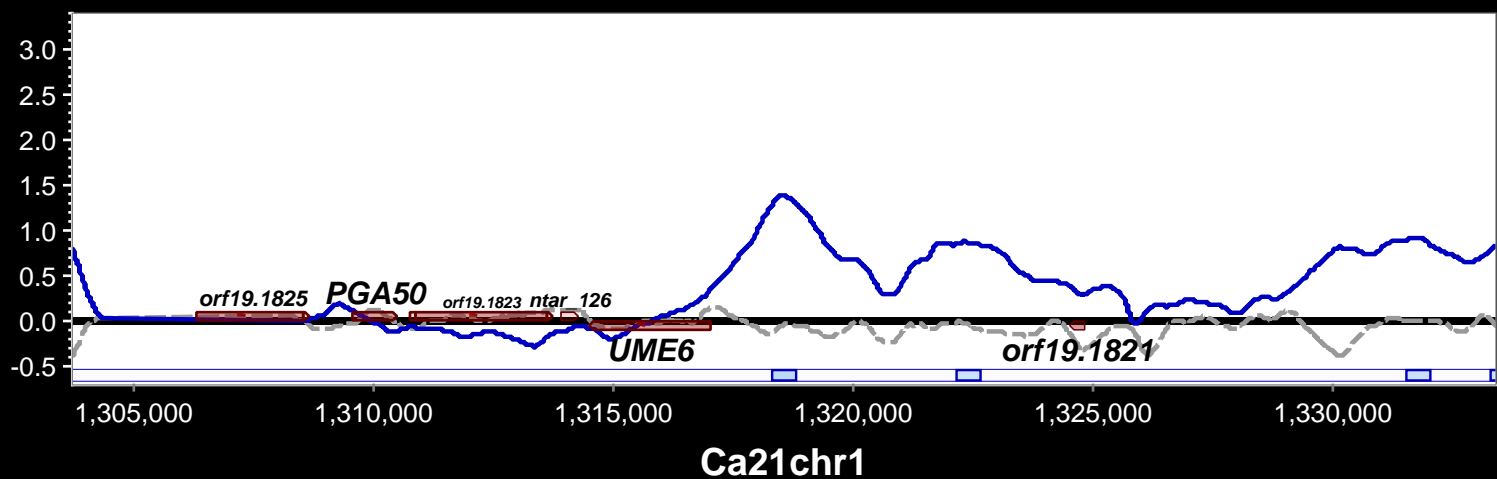

[1.386] Ca21chrR:1955731-1985414 [+] [CBP1, THI13, orf19.7322, orf19.7321, orf19.7325]

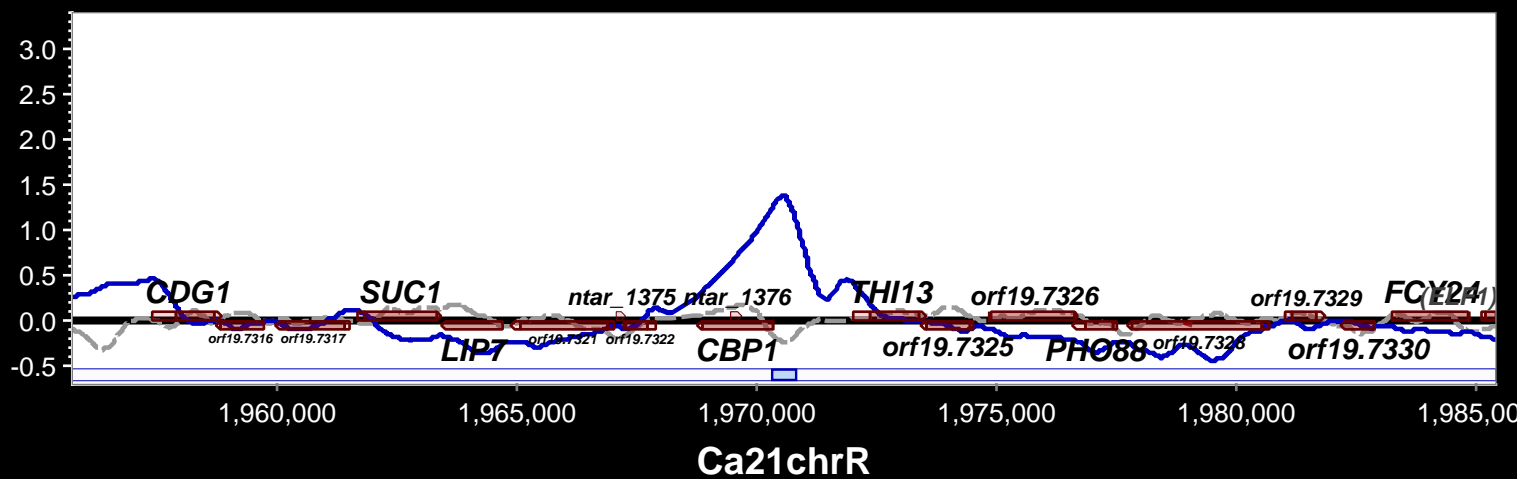

[1.385] Ca21chr3:782525-812208 [+] [PTR2, MEU1, RAD53, orf19.6941, orf19.6934]

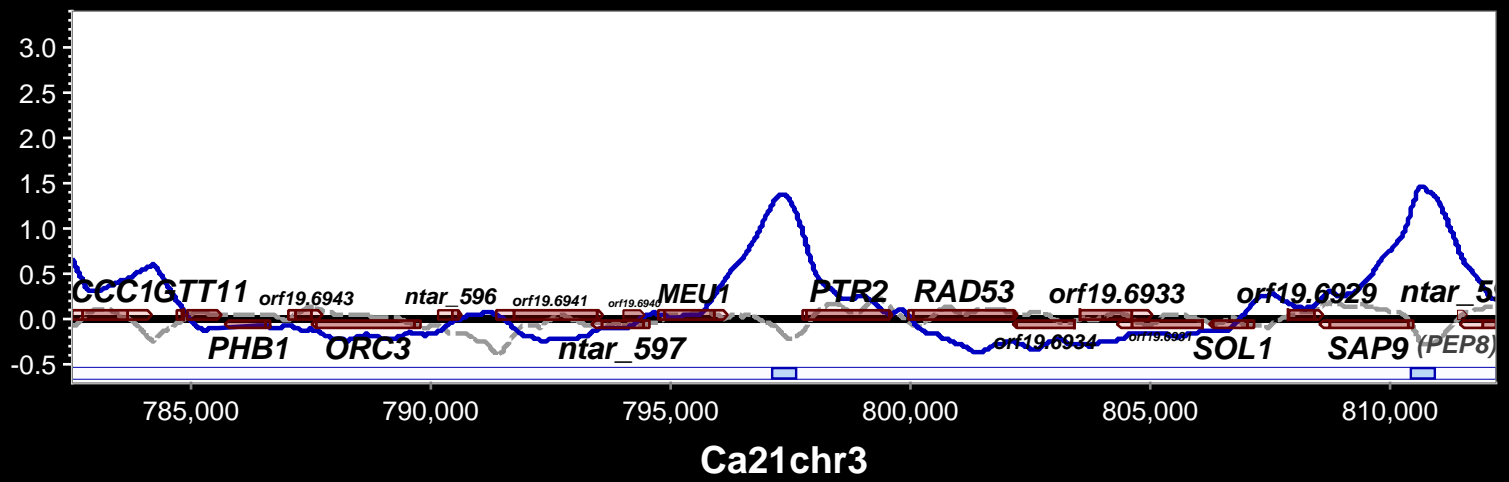

[1.38] Ca21chr7:1-29684 [+] [FRP2, SOD3, CSA1, orf19.7111, orf19.7110]

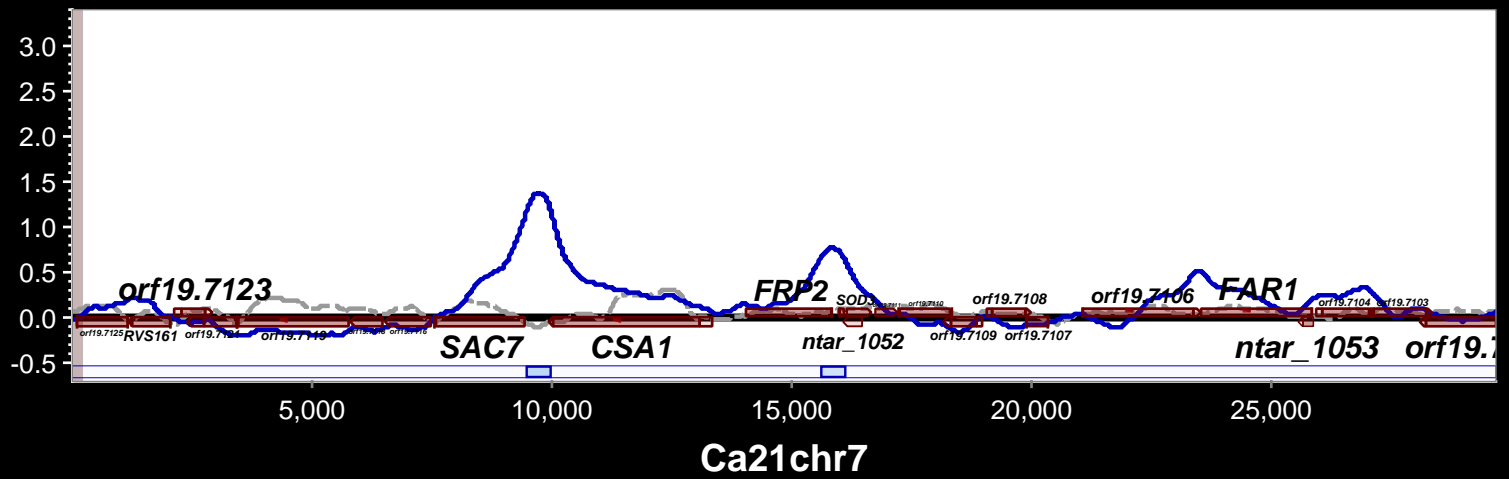

[1.378] Ca21chrR:1672040-1701723 [+] [YHB1, orf19.3706, PTC6, orf19.3704.1, orf19.3704]

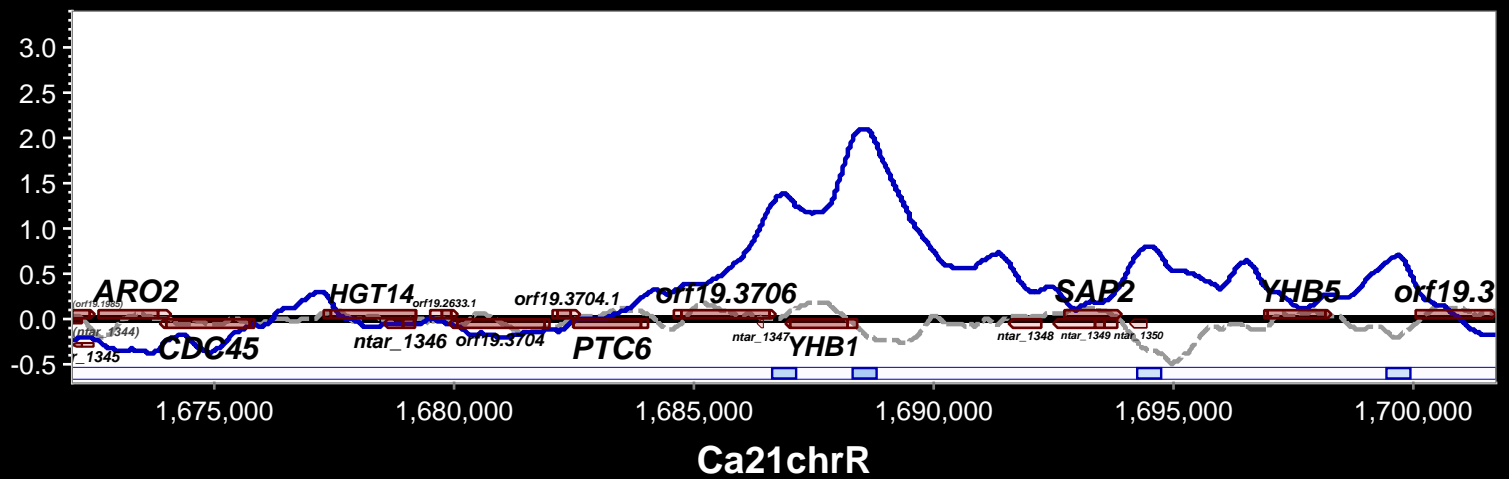

[1.375] Ca21chr5:577879-607562 [+] [MNN1, orf19.4280, orf19.4281, orf19.4278, orf19.4282]

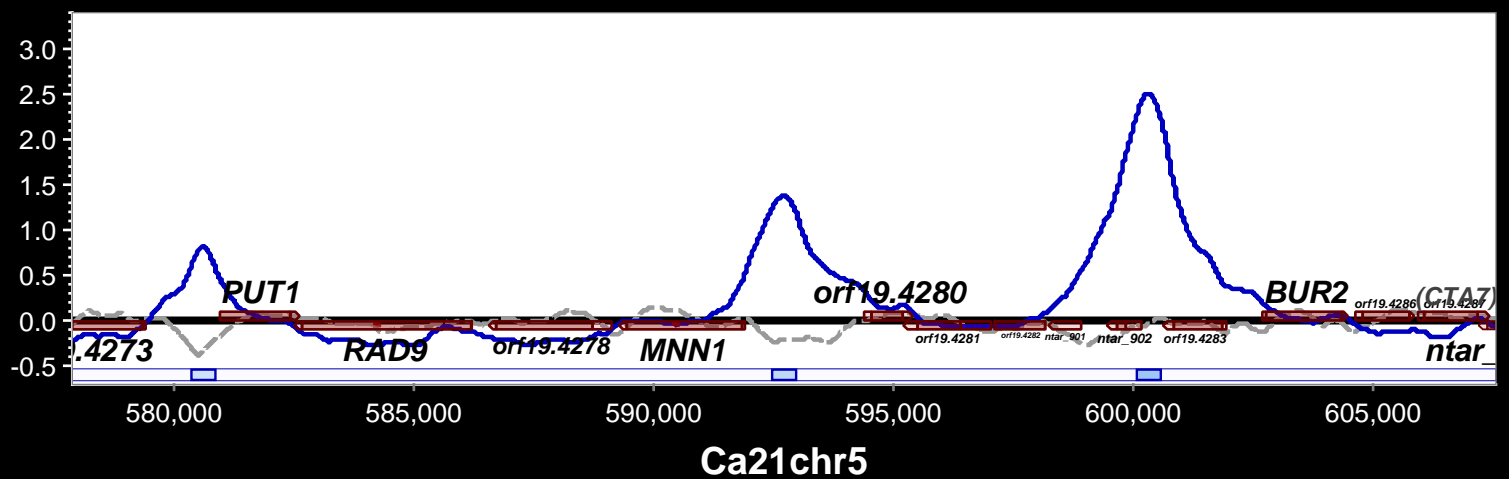

[1.375] Ca21chr5:813517-843200 [+] [FAV2, orf19.1121, orf19.1122, orf19.1123, orf19.1124]

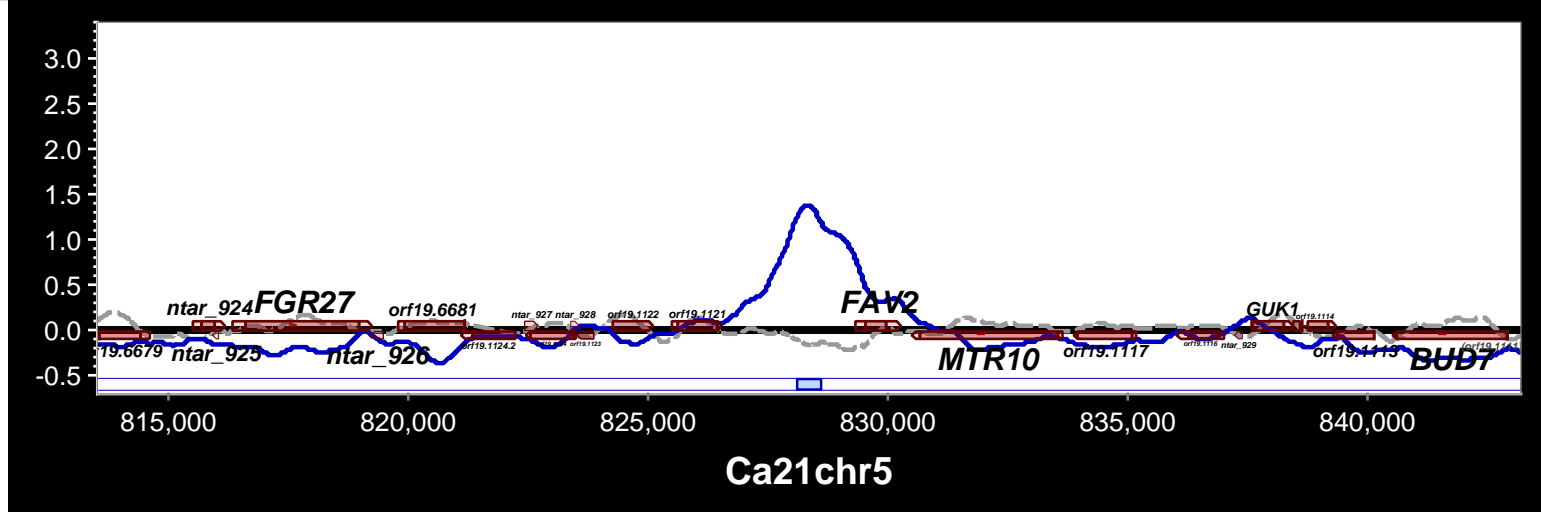

[1.375] Ca21chrR:2214299-2243982 [+] [orf19.7624, PGA1, EIF4E, SPT3, orf19.7627]

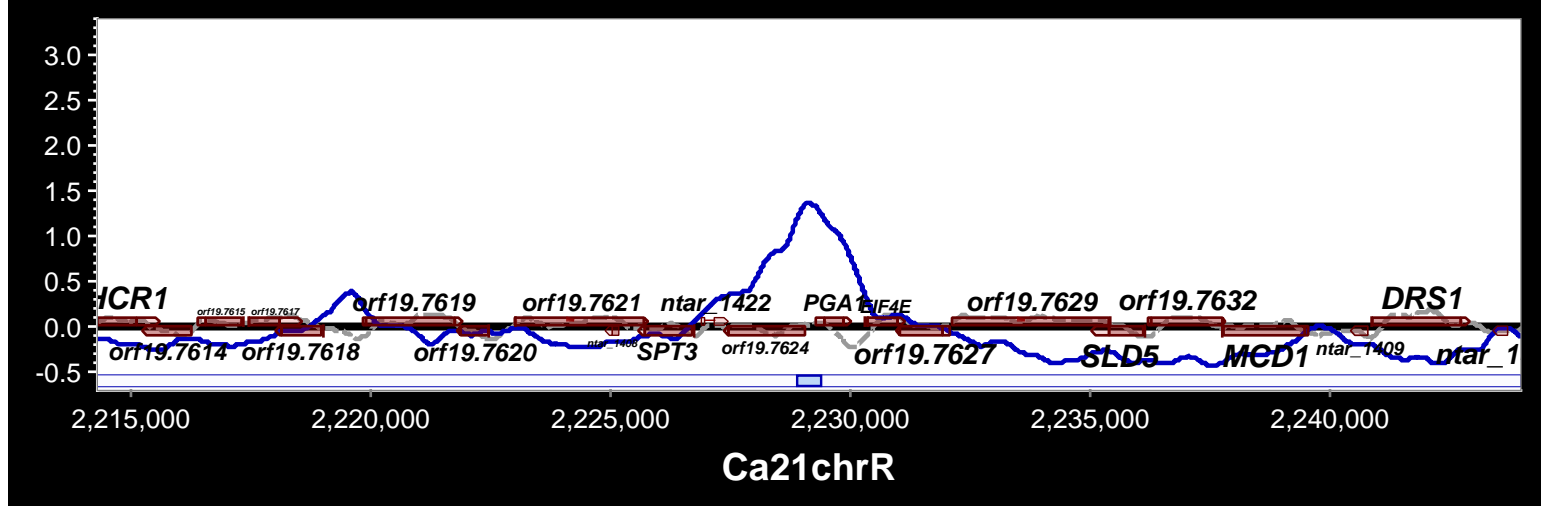

[1.374] Ca21chr2:207331-237014 [+] [orf19.1995, orf19.1994, orf19.1993, tL(UAA)1, CHA1]

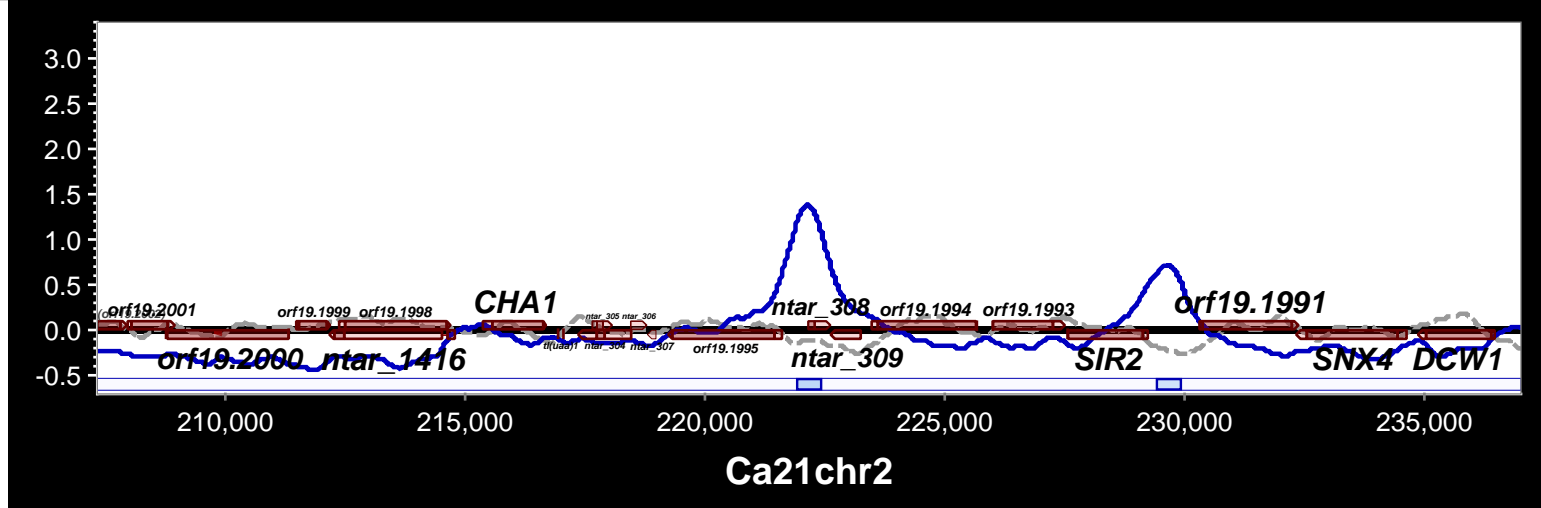

[1.374] Ca21chr3:958745-988428 [+] [orf19.5917.3, orf19.5918, MEA1, STP3, orf19.5920]

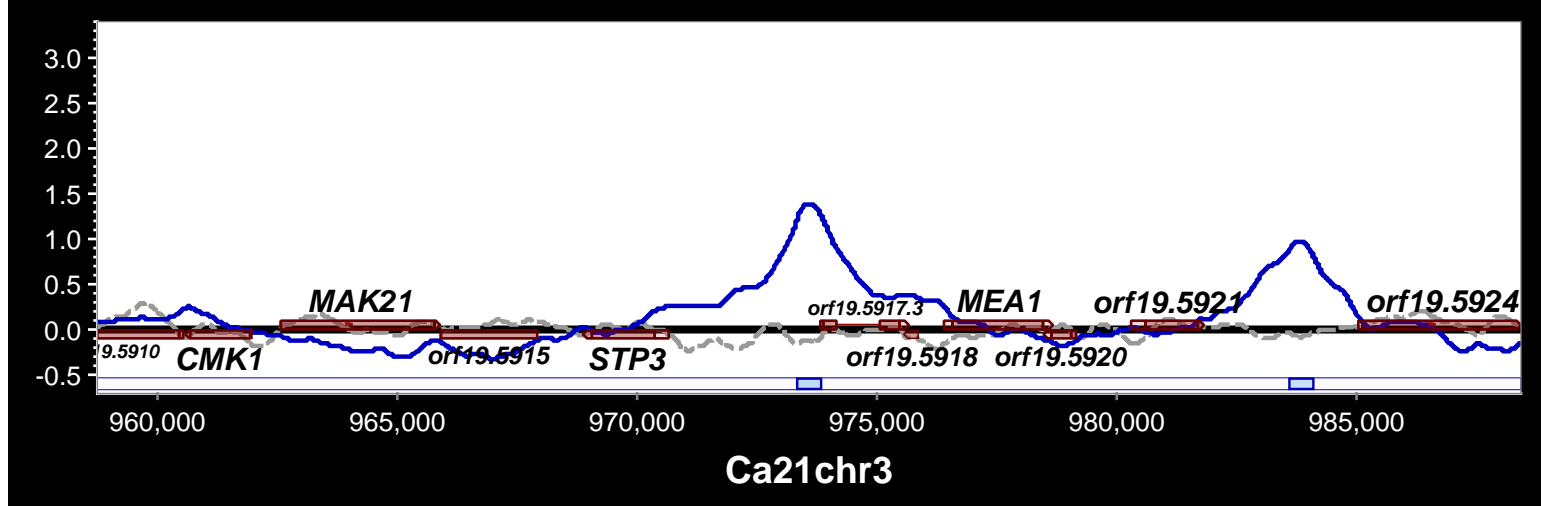

[1.368] Ca21chr5:239860-269543 [+] [orf19.1959, CYC3, CLN3, orf19.1956, orf19.1955]

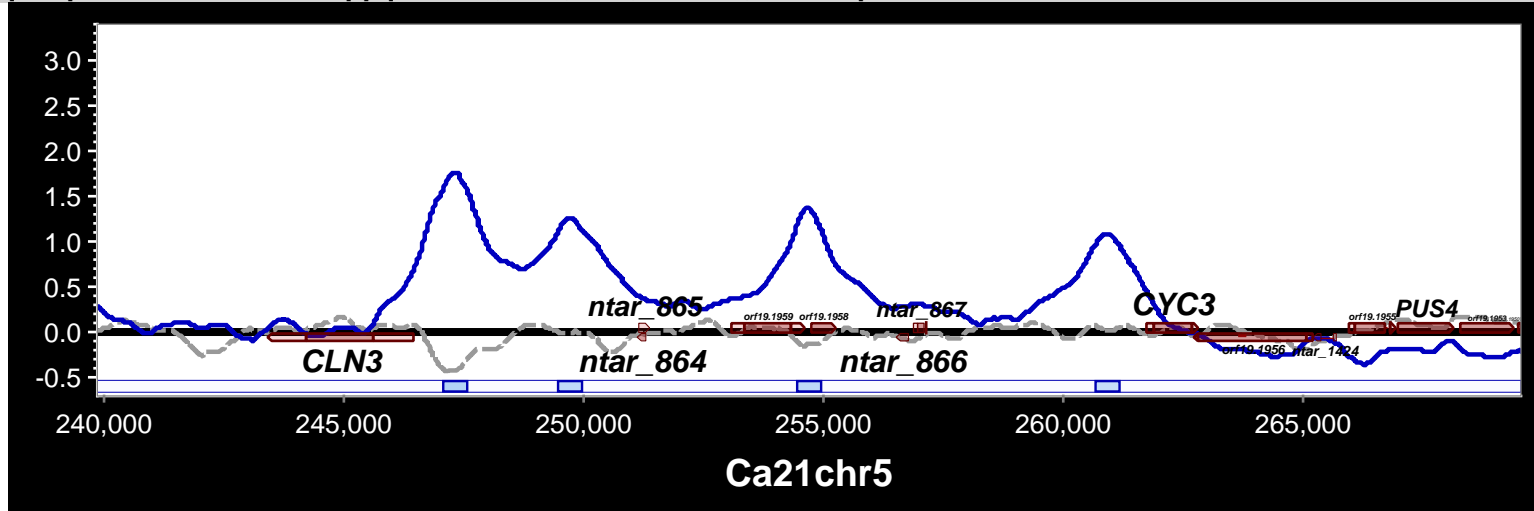

[1.367] Ca21chr2:814750-844433 [+] [orf19.828, SCH9, RPL39, orf19.827, orf19.831]

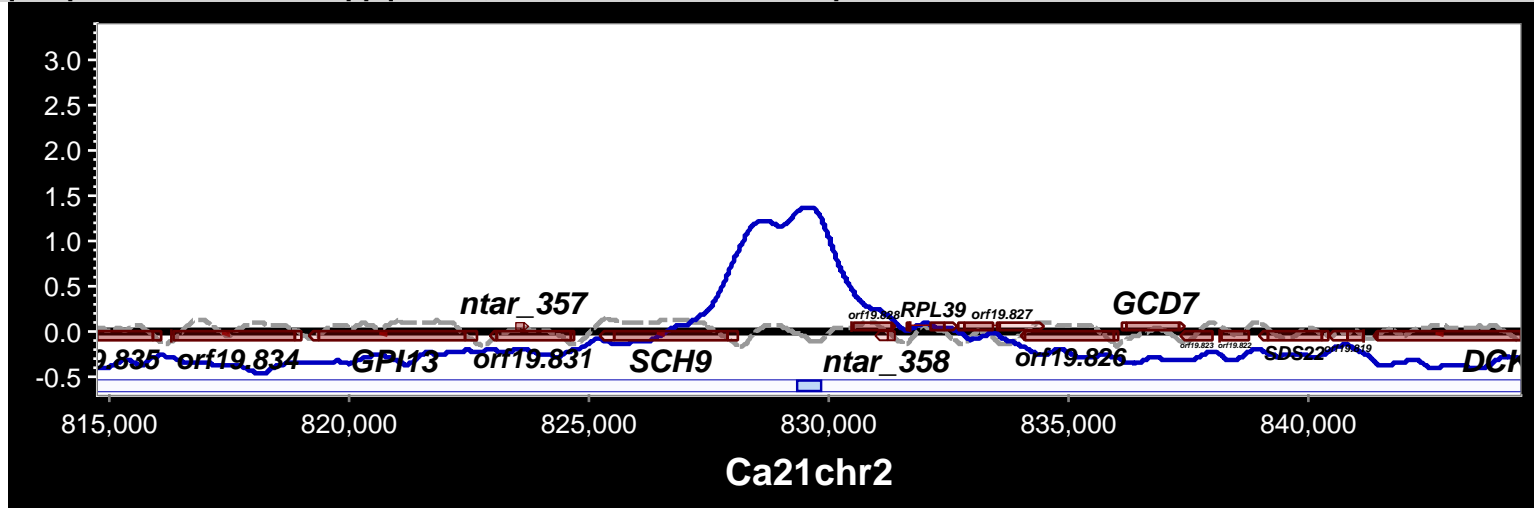

[1.365] Ca21chr4:556256-585939 [+] [orf19.2724, orf19.2725, HIT1, CGR1, orf19.2721]

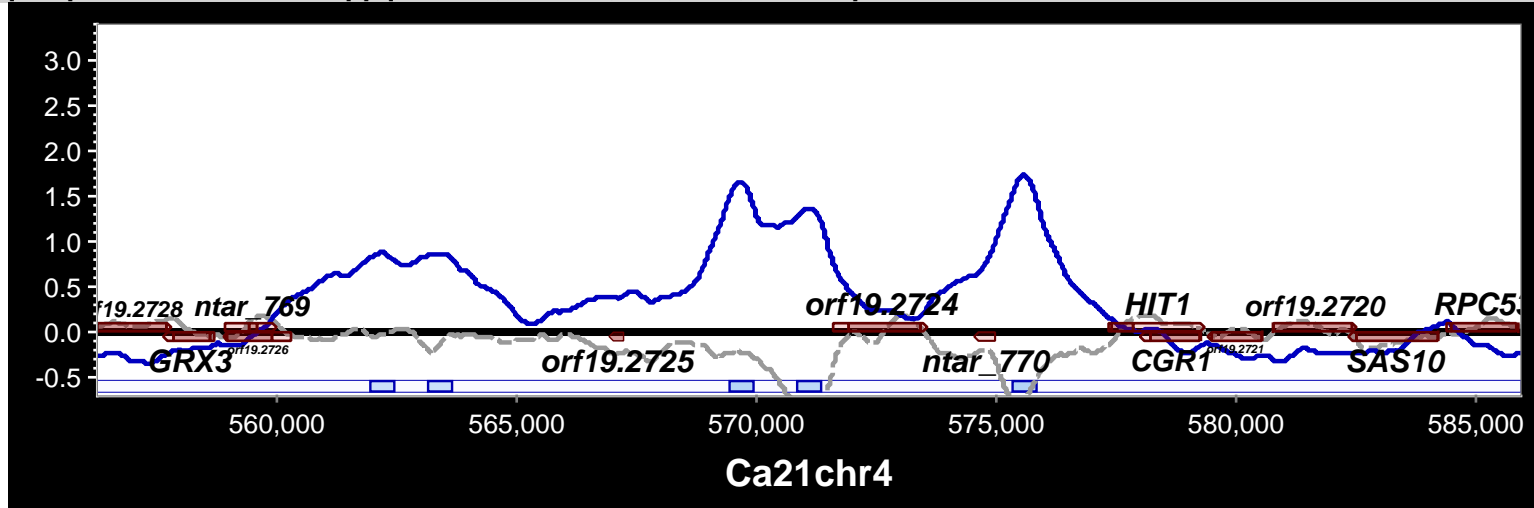

[1.363] Ca21chr2:148930-178613 [+] [orf19.2024, HGT7, orf19.2025, orf19.2026, HGT8]

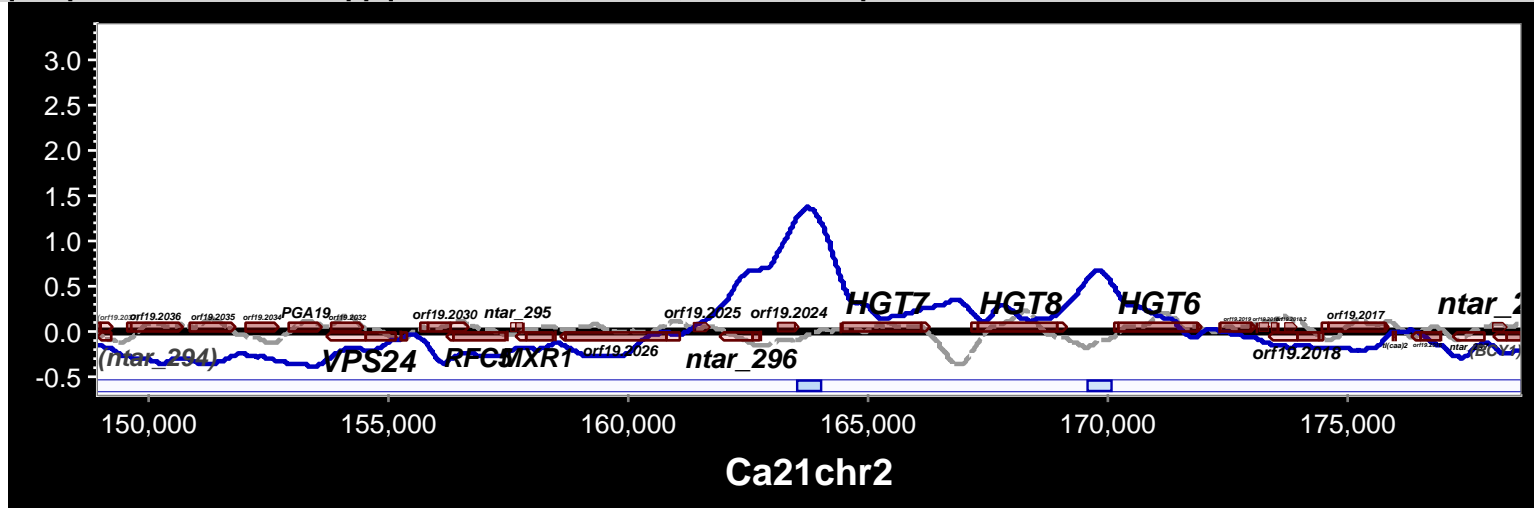

[1.361] Ca21chr3:1631717-1661400 [+] [BMT1, orf19.6781, orf19.6783, MET8, PRO2]

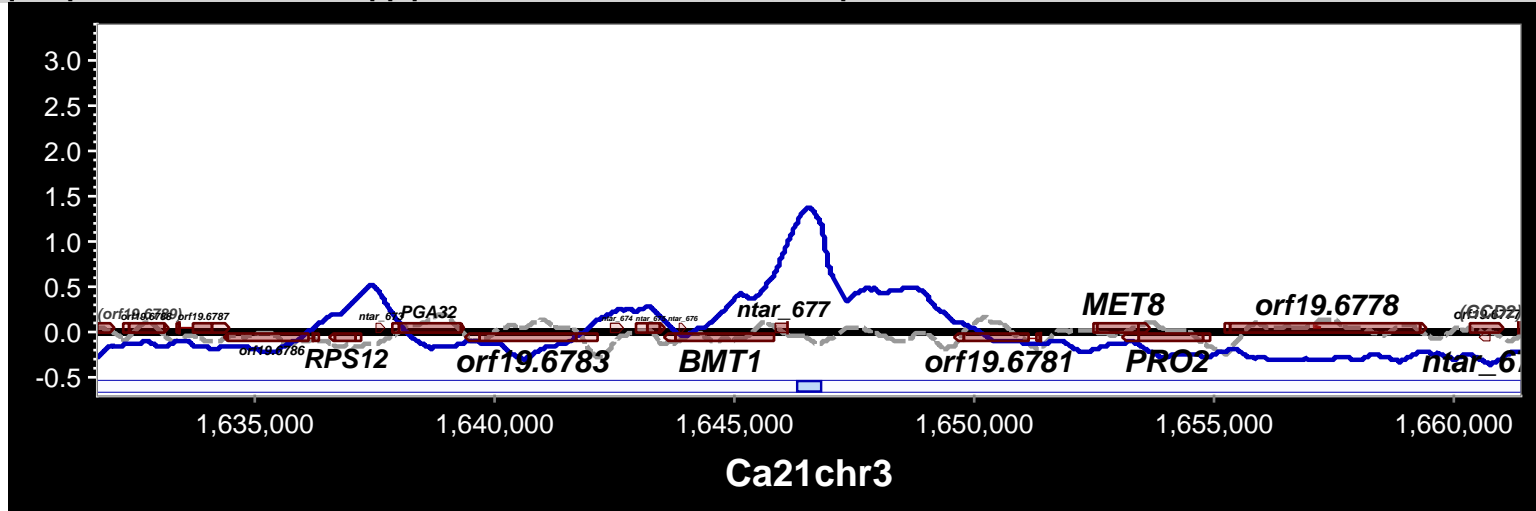

[1.359] Ca21chr3:867113-896796 [+] [orf19.5866, WSC1, orf19.5869, orf19.5865, URK1]

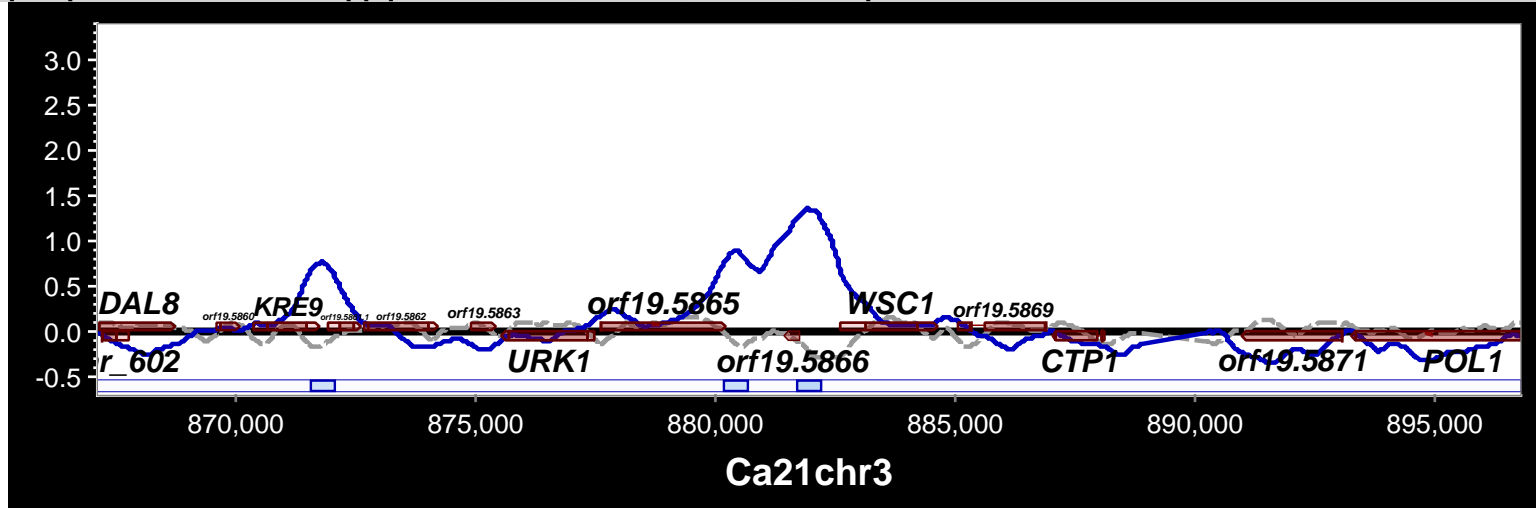

[1.358] Ca21chr2:612779-642462 [+] [orf19.5785, orf19.5784, EFT2, ADE8, orf19.5783]

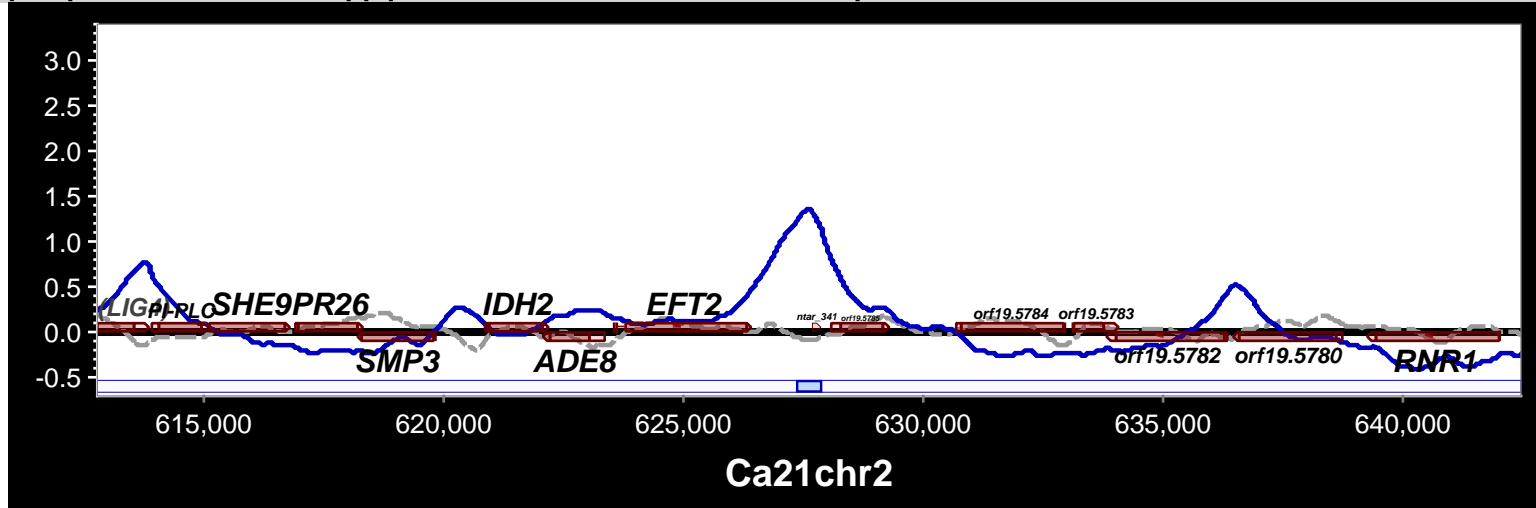

[1.357] Ca21chr1:380334-410017 [+] [orf19.4531, orf19.4532, orf19.4533, orf19.4534, orf19.4530.1]

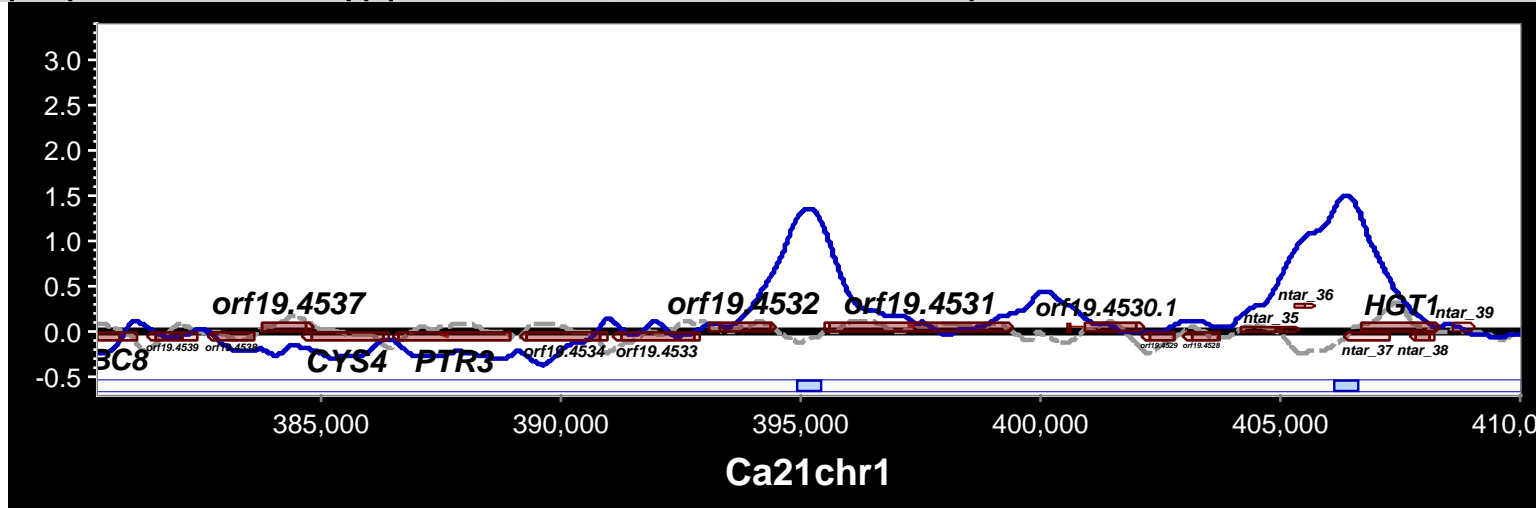



[1.35] Ca21chr5:359760-389443 [+] [DAL52, CCN1, MYO1, CCT7, orf19.3205]

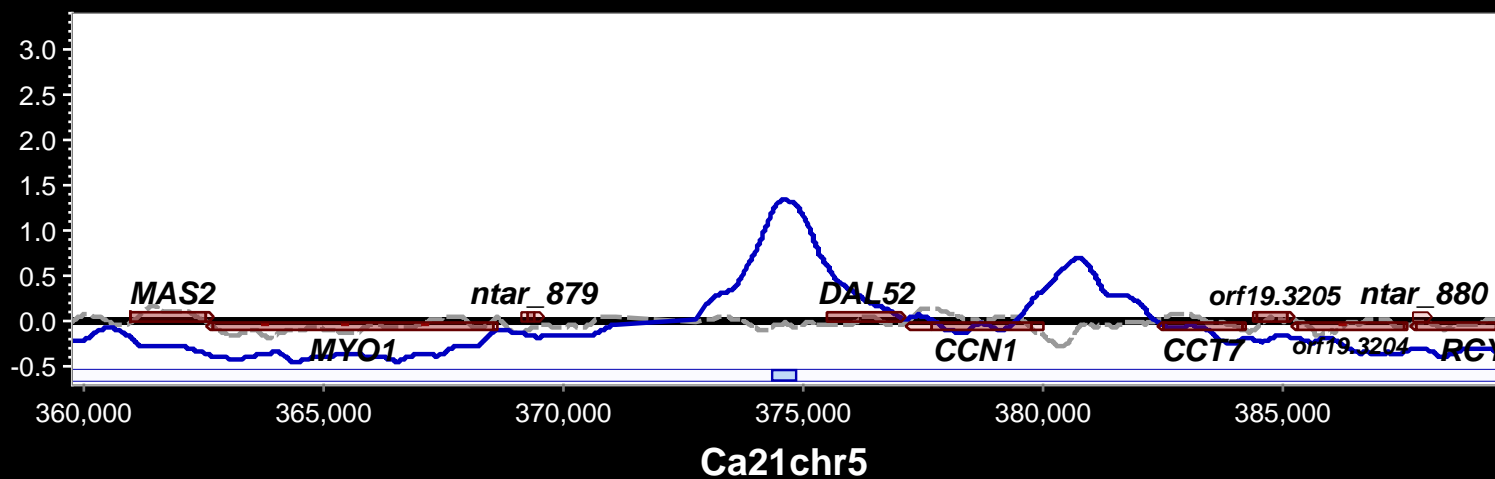

[1.348] Ca21chr2:1506459-1536142 [+] [orf19.1887, RCL1, TAF4, orf19.1888, YCS4]

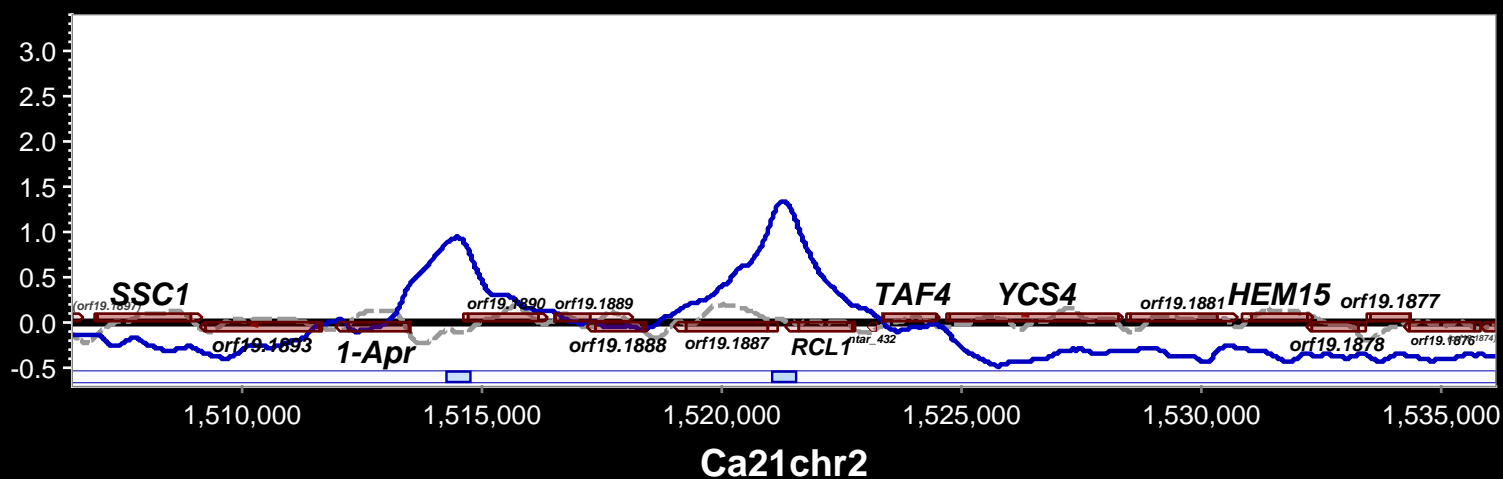

[1.347] Ca21chr3:1161535-1191218 [+] [orf19.6968, USO6, orf19.6966, orf19.6970, DIE2]

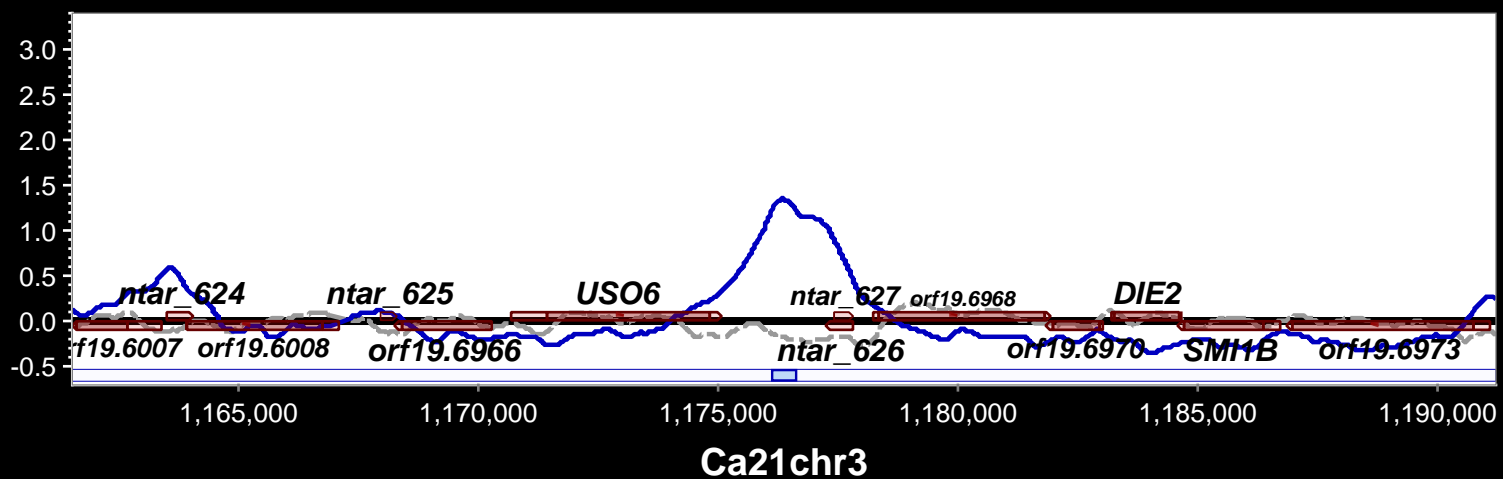

[1.344] Ca21chr5:223773-253456 [+] [orf19.1961, CLN3, orf19.1963, orf19.1964, BUD23]

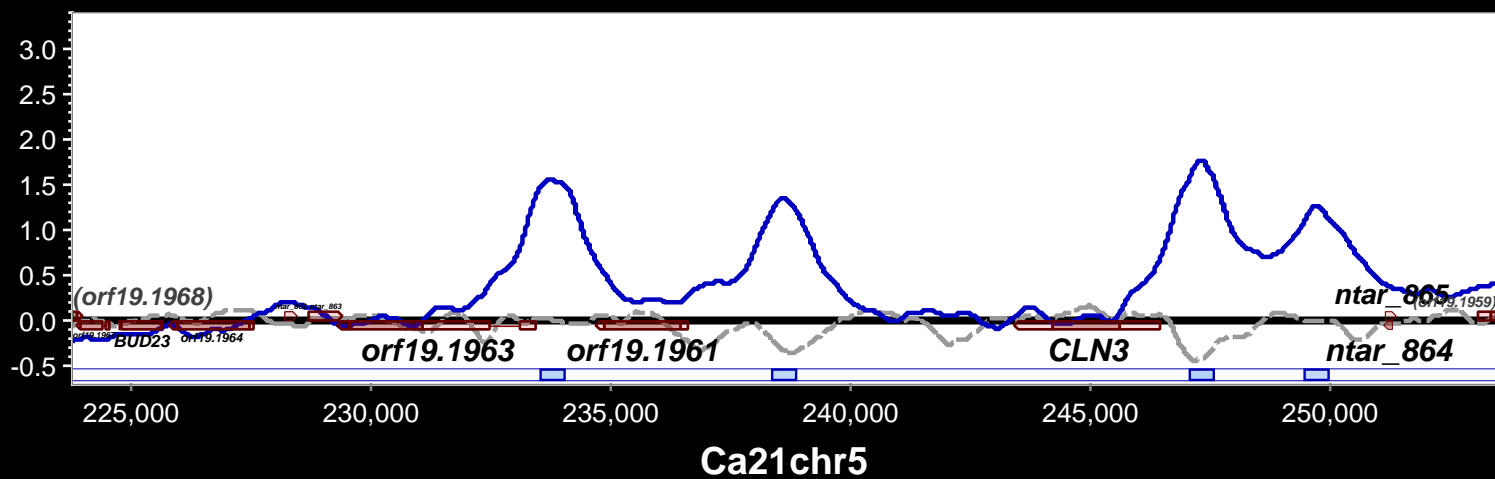

[1.339] Ca21chr1:1827236-1856919 [+] [TEF2, SDS24, orf19.384, OLE1, GCV2]

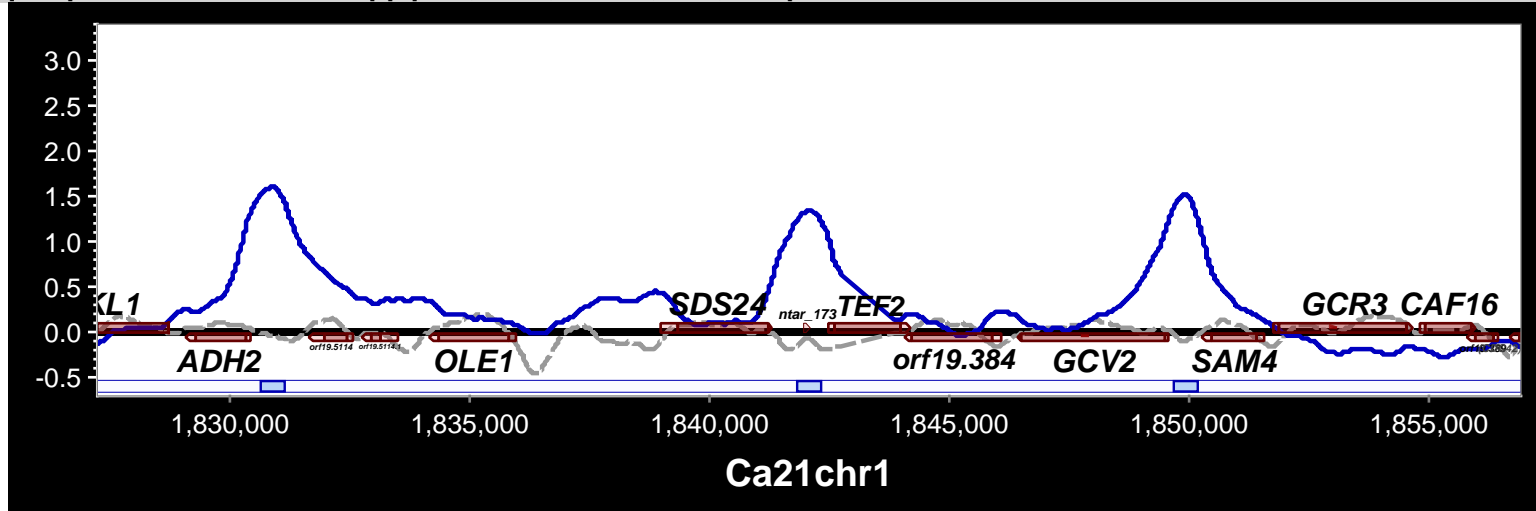

[1.334] Ca21chr1:2331077-2360760 [+] [orf19.1830, orf19.1831, orf19.1005, FCY23, orf19.1002]

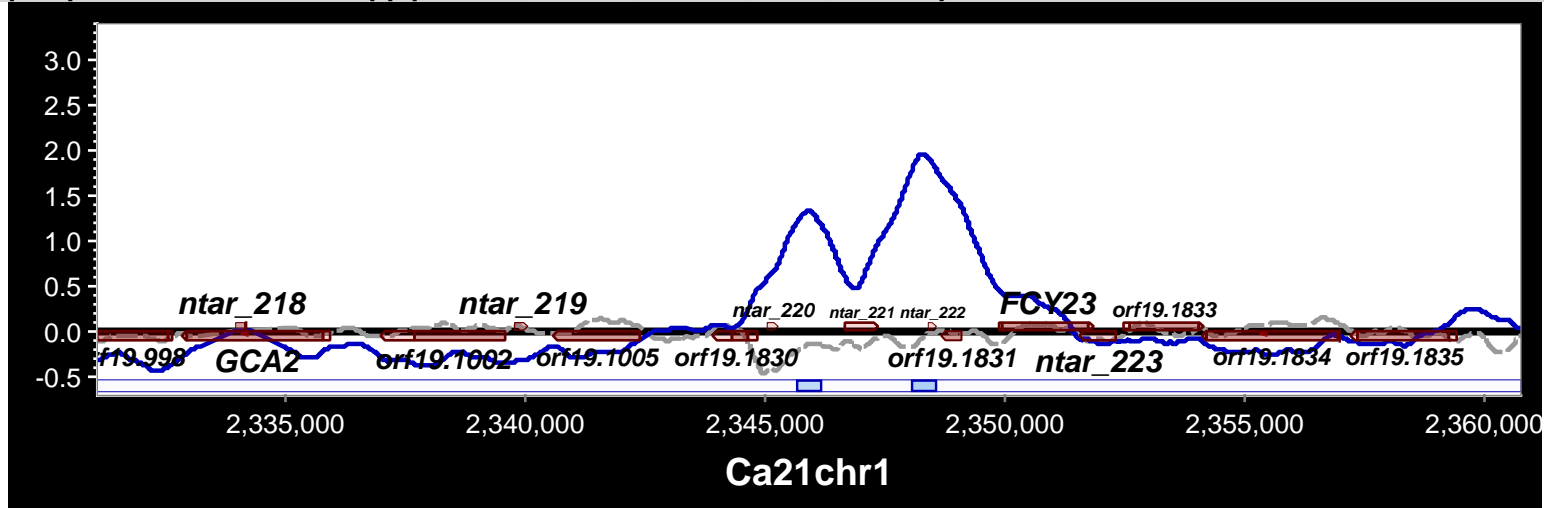

[1.333] Ca21chr6:892360-922043 [+] [ALS4, orf19.4553, orf19.77.1, SPB1, orf19.4557]

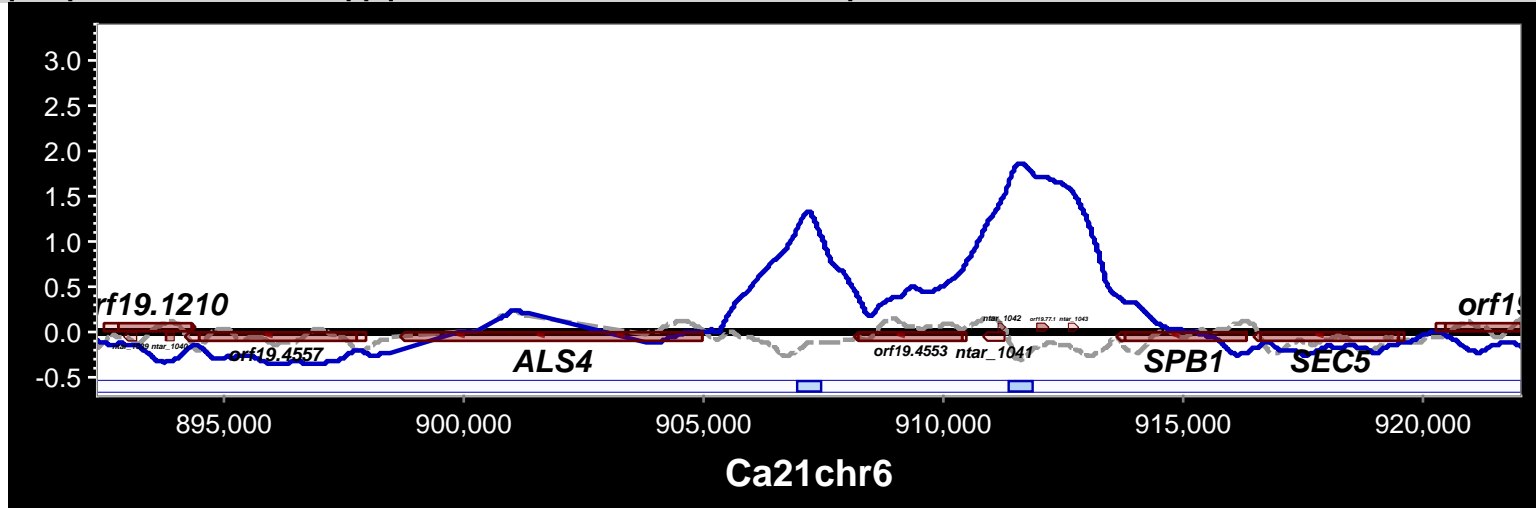

[1.329] Ca21chr1:609617-639300 [+] [XOG1, HOL1, orf19.2989, RPP1A, orf19.2988]

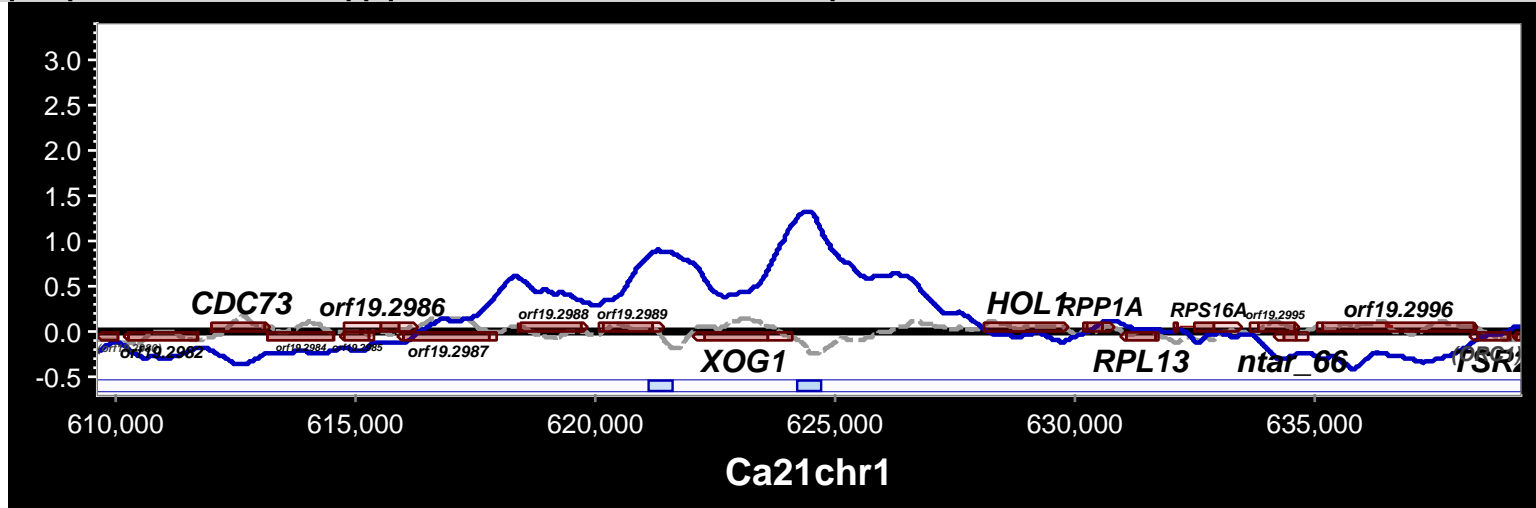

[1.327] Ca21chr3:12824-42507 [+] [HGT19, orf19.5449, orf19.5450, orf19.5446, DAL1]

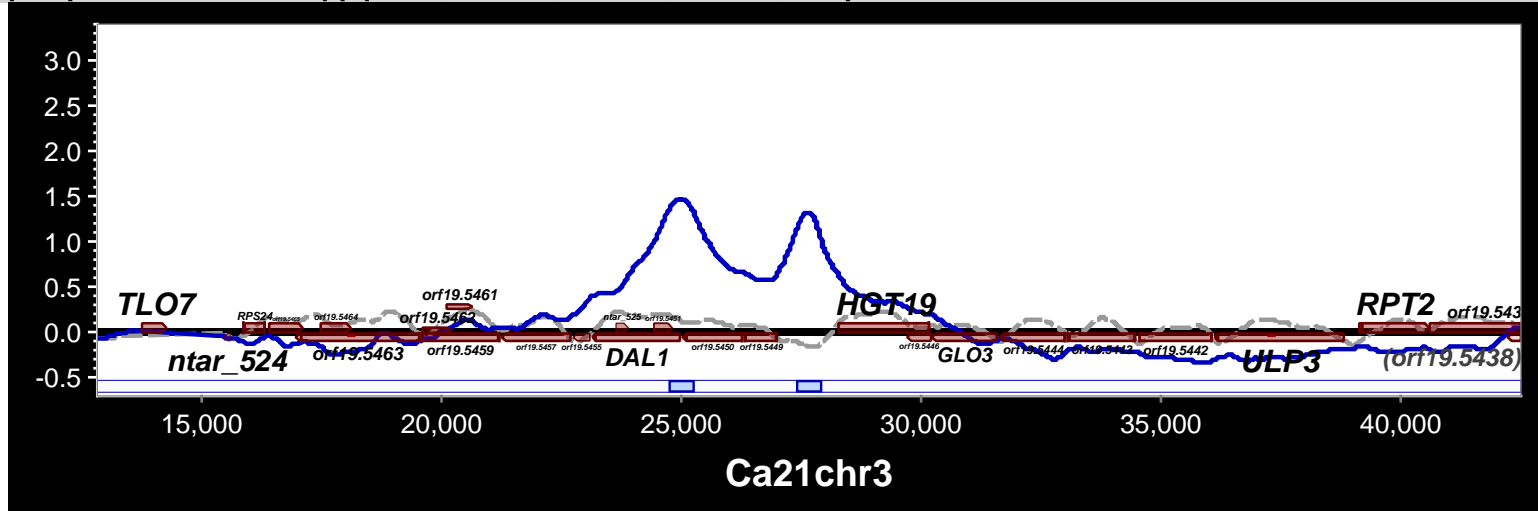

[1.327] Ca21chr3:934328-964011 [+] [TEC1, ADE2, orf19.5905, RPL19A, RAX1]

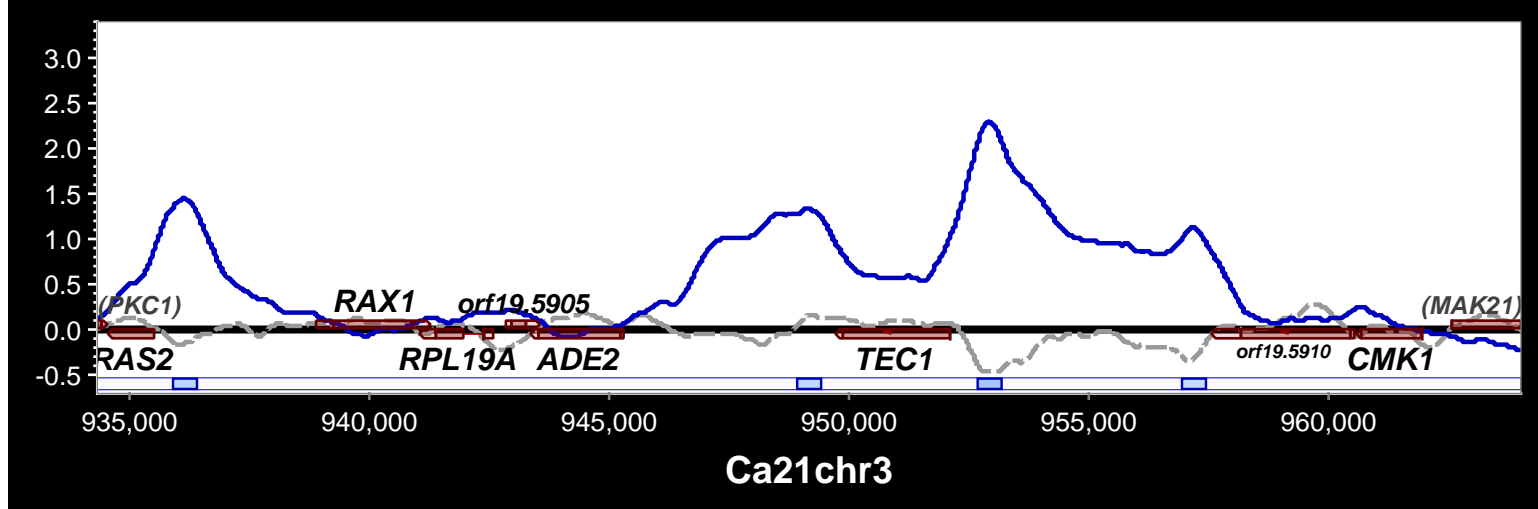

[1.321] Ca21chr2:770362-800045 [+] [orf19.849, orf19.850, tR(UCU)2, tF(GAA)2, orf19.851]

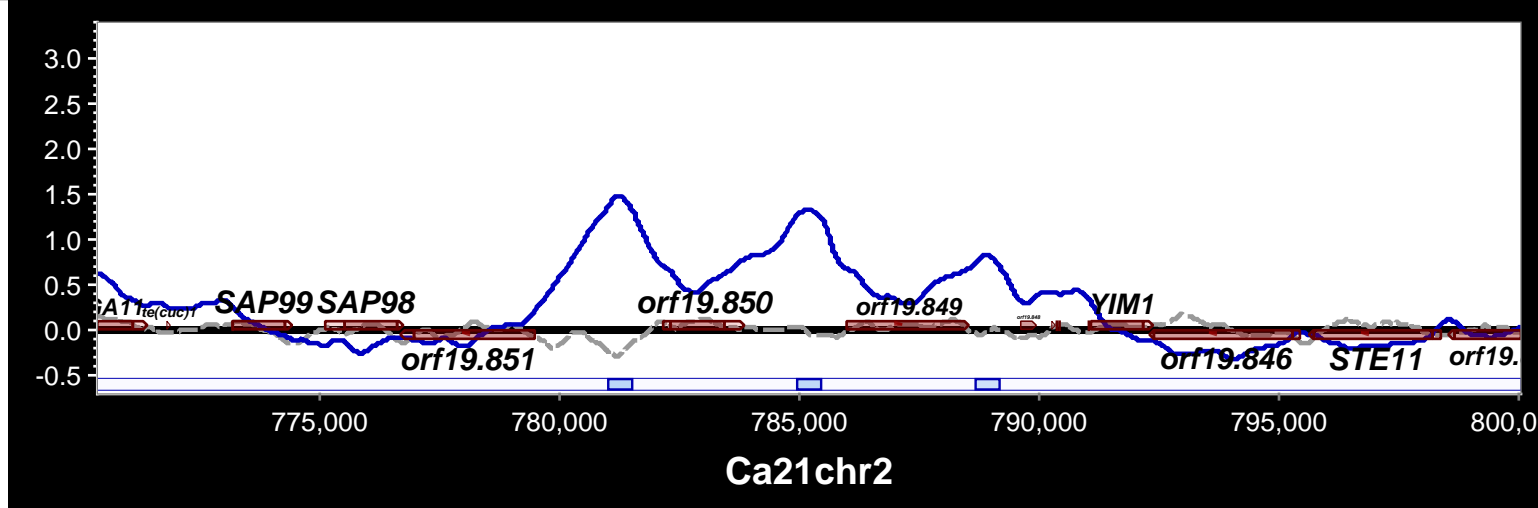

[1.319] Ca21chr1:1391687-1421370 [+] [ANT1, orf19.6255, RPS23A, orf19.6252, orf19.6250]

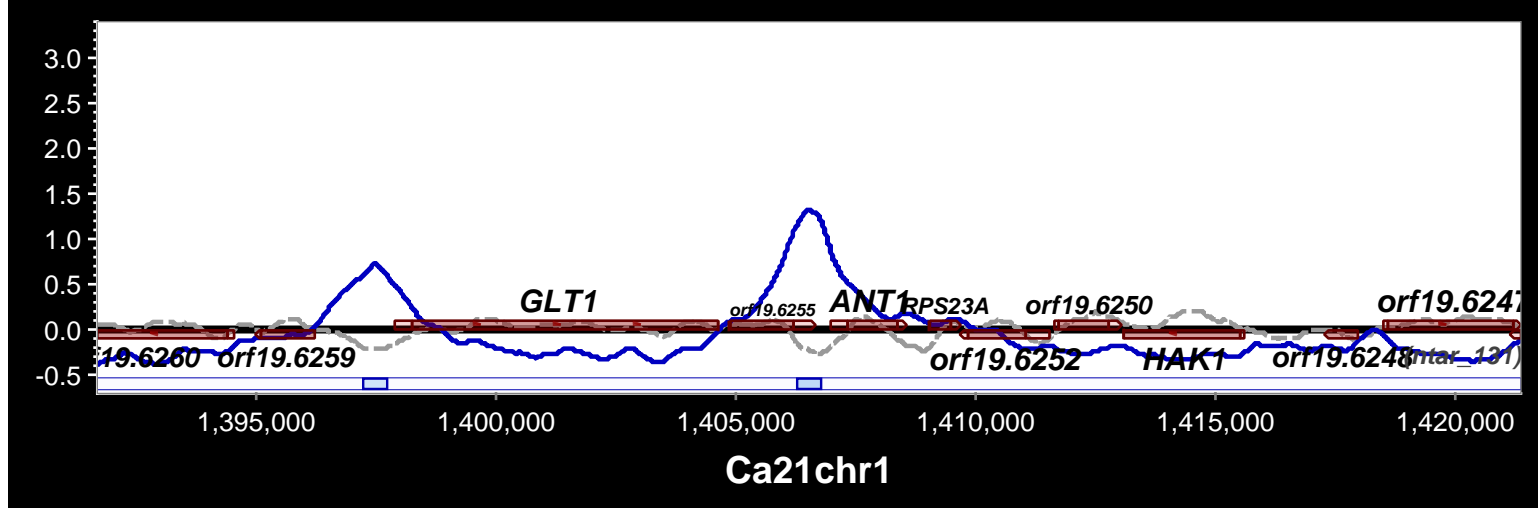

[1.316] Ca21chr2:1574570-1604253 [+] [orf19.2203.1, orf19.2203, orf19.2202, orf19.2201, orf19.2204]

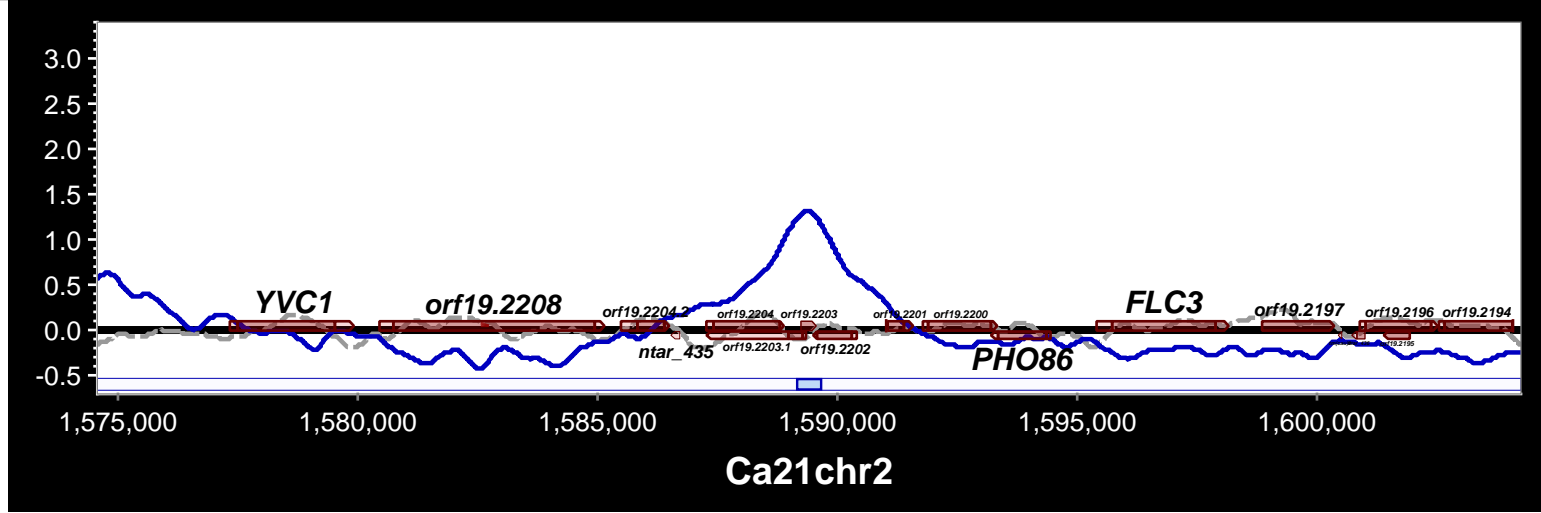

[1.311] Ca21chr3:1198413-1228096 [+] [orf19.6982, orf19.6983, orf19.6981, orf19.6980, orf19.6979]

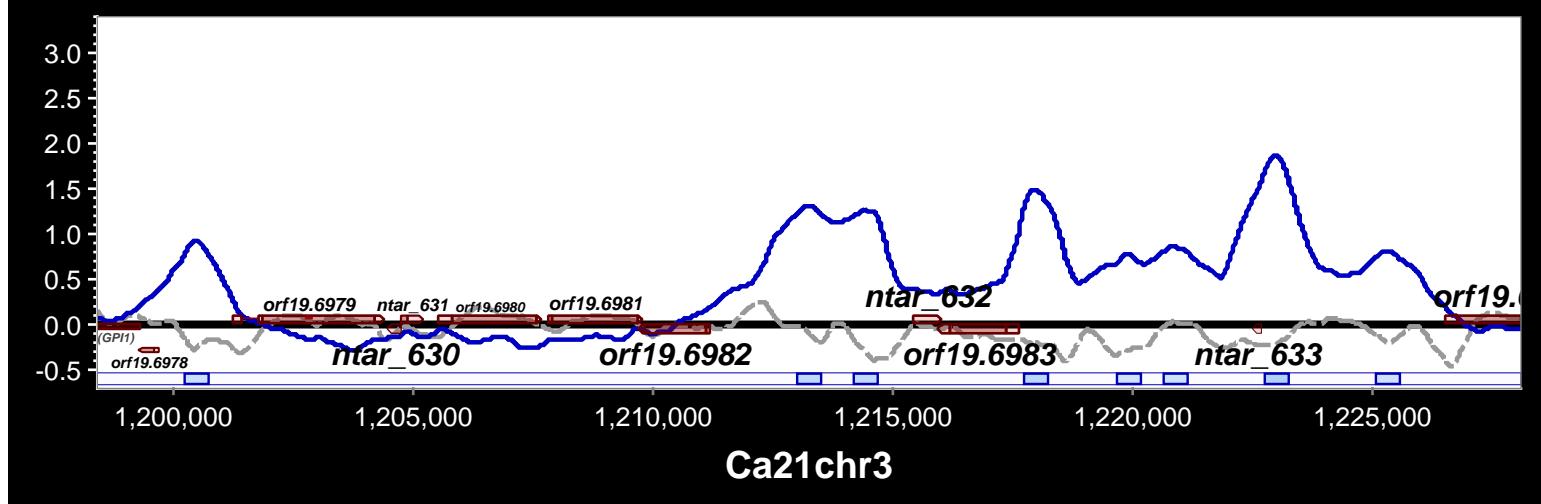

[1.309] Ca21chr5:315190-344873 [+] [orf19.4142, orf19.4143, orf19.4144, YBL053, ZCF20]

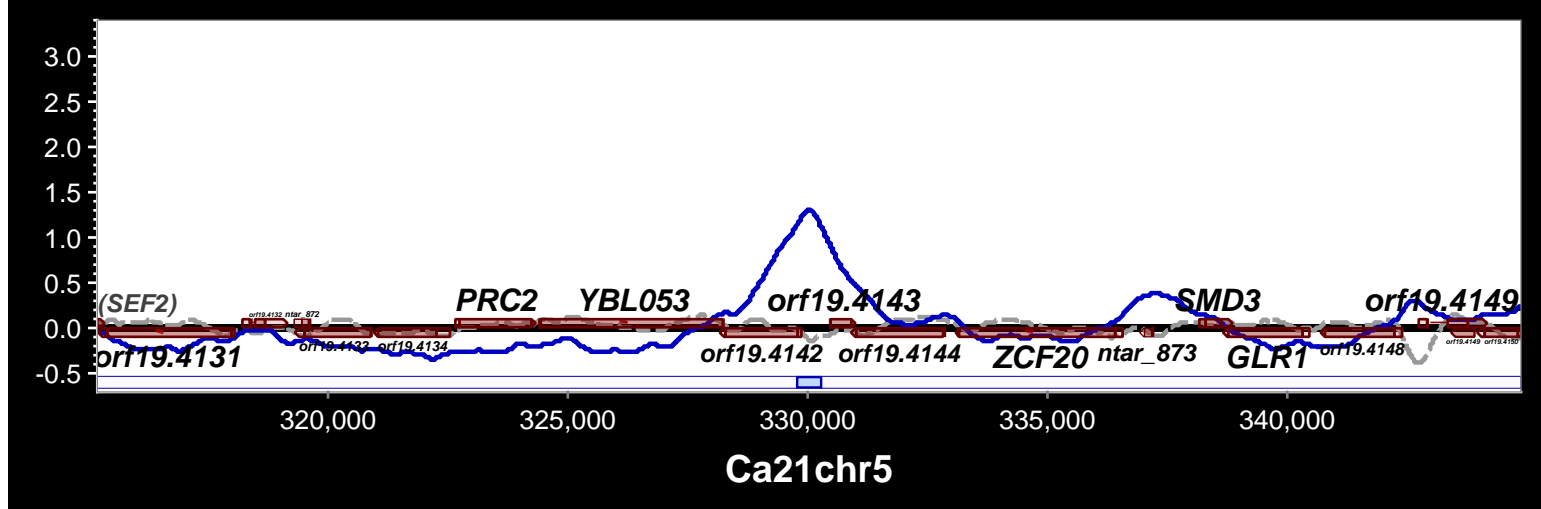

[1.309] Ca21chr6:275875-305558 [+] [orf19.3439, FRP5, orf19.3438, orf19.3437, FRP6]

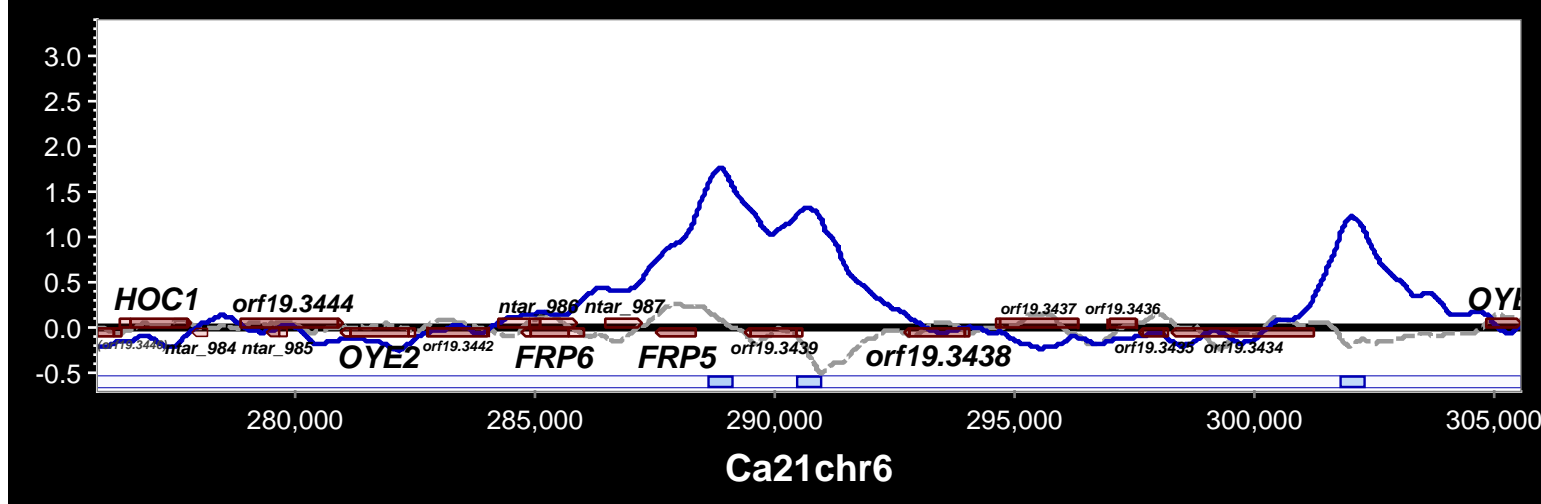

[1.309] Ca21chrR:2090661-2120344 [+] [DEF1, YTA6, FGR46, orf19.7556, orf19.7554]

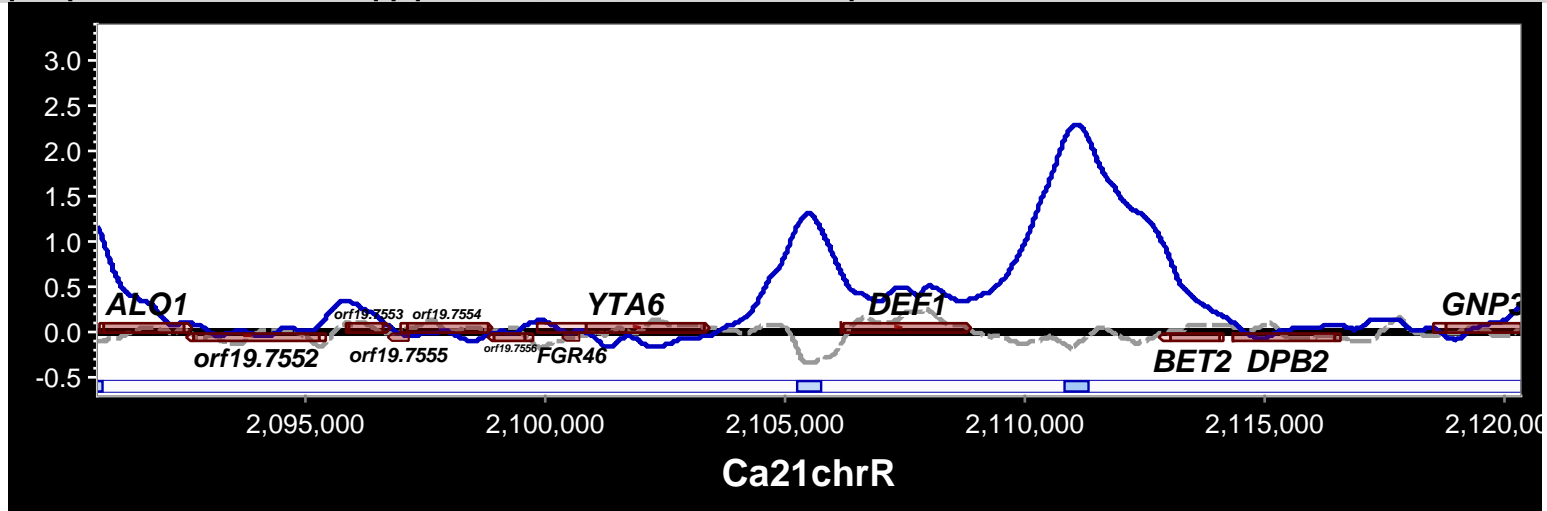

[1.306] Ca21chr4:926365-956048 [+] [orf19.1409.3, orf19.1409.1, LYS4, orf19.1409.2, FGR3]

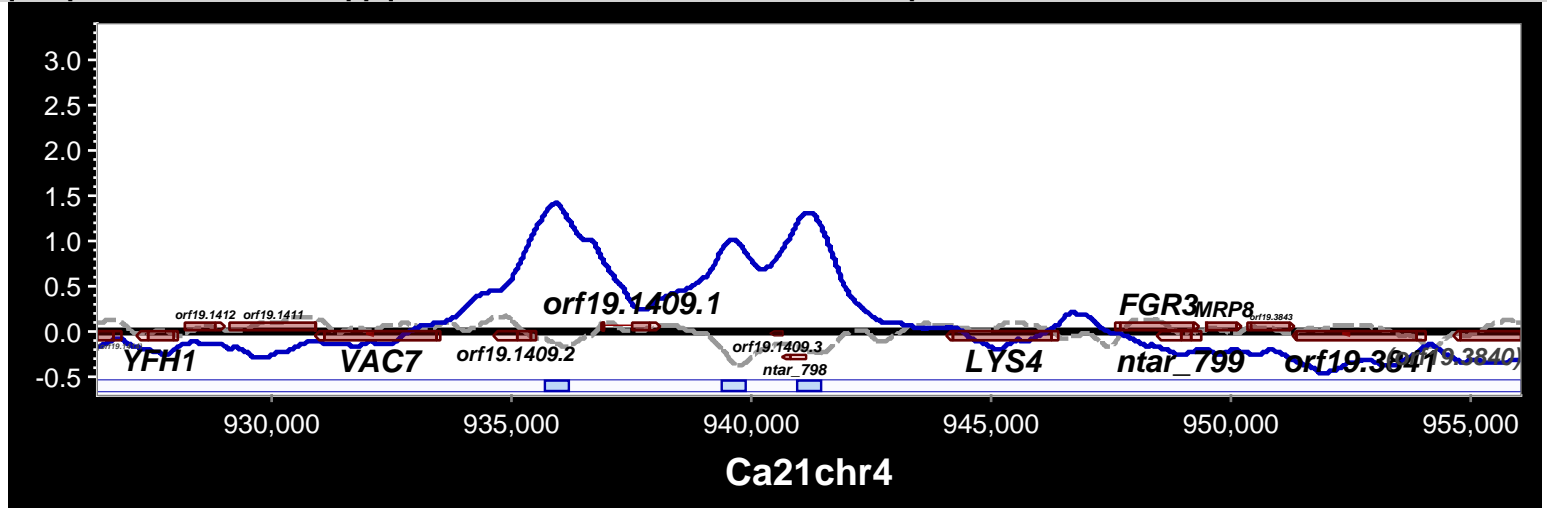

[1.296] Ca21chr2:1921327-1951010 [+] [orf19.1604, PMS1, orf19.1406, PHO13, orf19.1404]

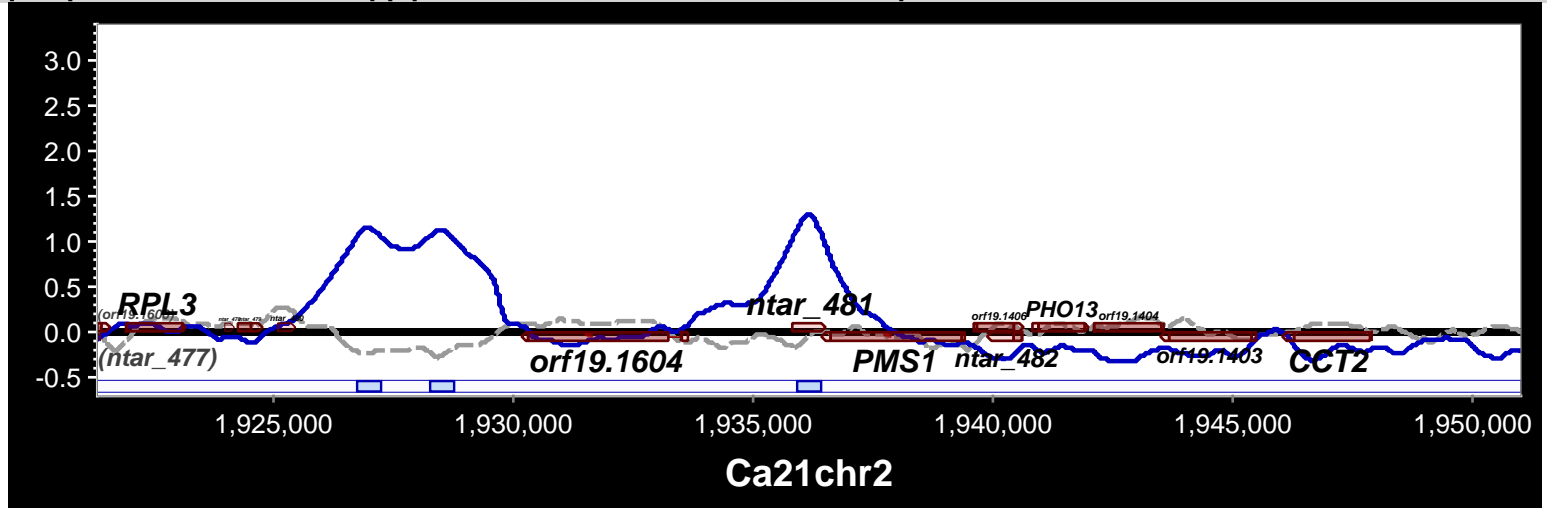

[1.296] Ca21chr3:634978-664661 [+] [orf19.302, orf19.304, PGA18, orf19.305, USO5]

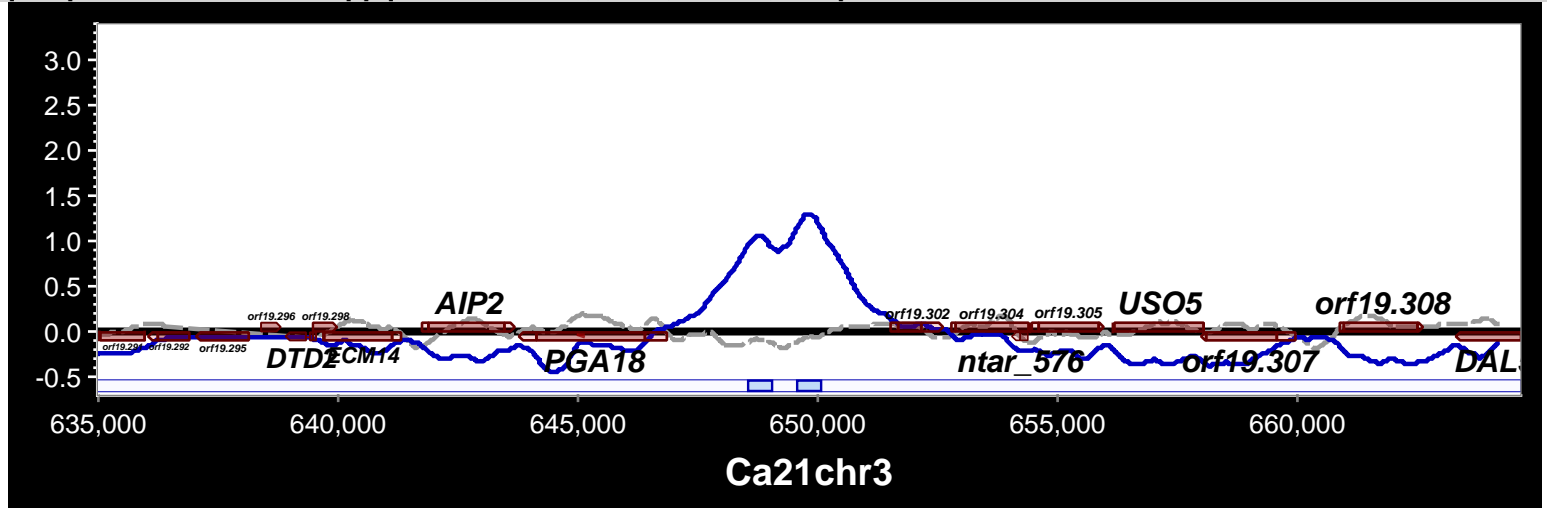

[1.287] Ca21chr1:650152-679835 [+] [ECM33, orf19.3010, orf19.3009, COQ4, ARO80]

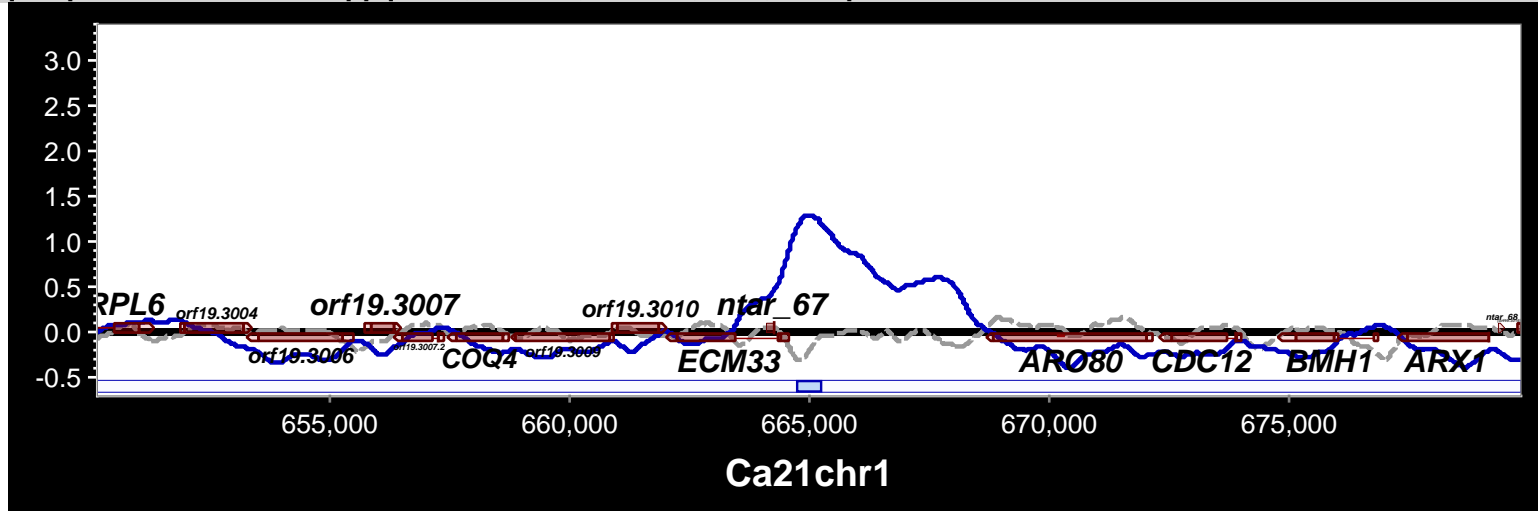

[1.282] Ca21chrR:160394-190077 [+] [BMT3, orf19.3281, tT(AGU)3, orf19.3283, orf19.3280]

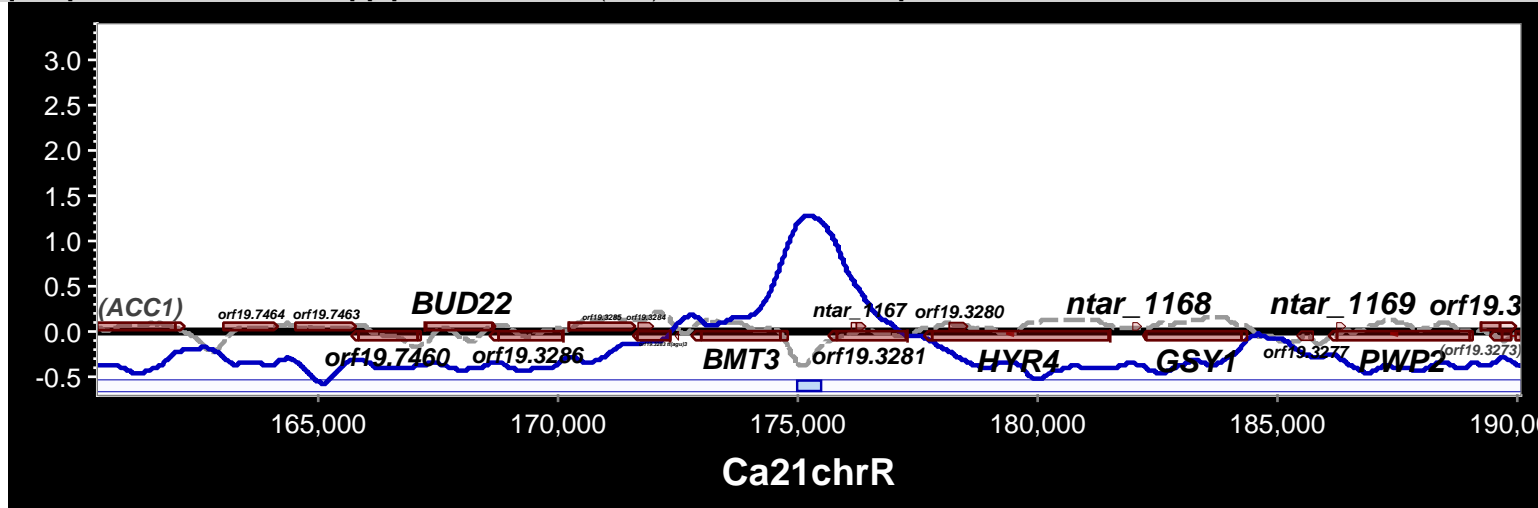

[1.278] Ca21chr7:350008-379691 [+] [orf19.6556, orf19.6555, orf19.6554, orf19.6557, orf19.6558]

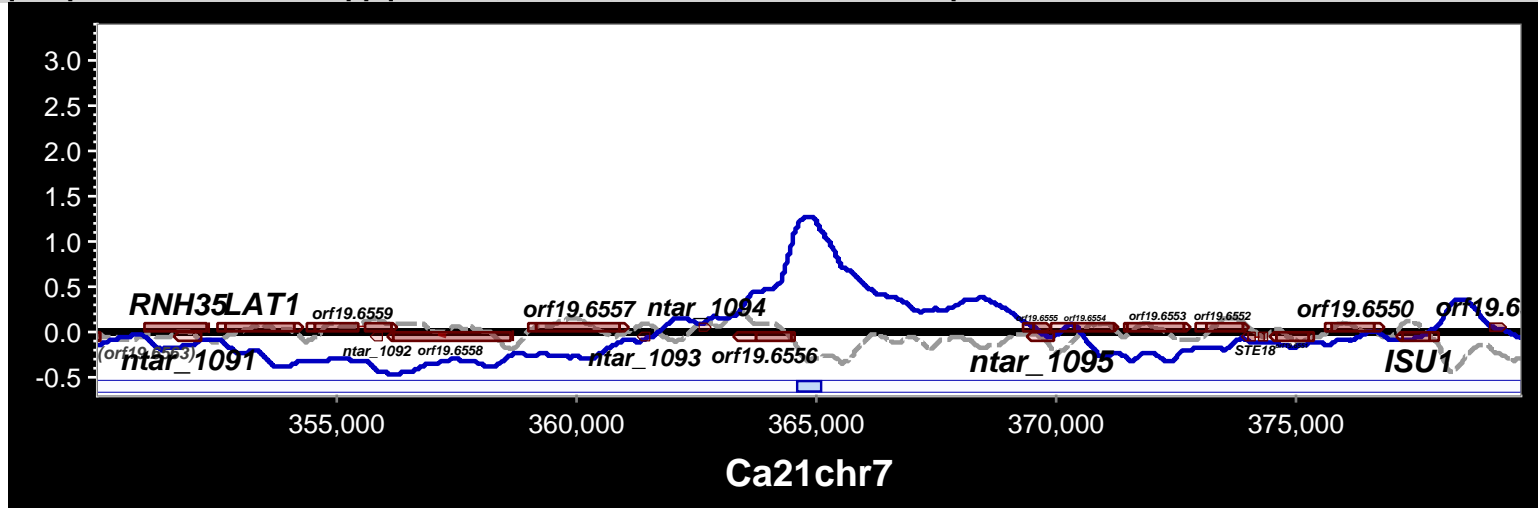

[1.277] Ca21chr3:1264086-1293769 [+] [orf19.7350, CHS4, orf19.7353, orf19.7354, SSN8]

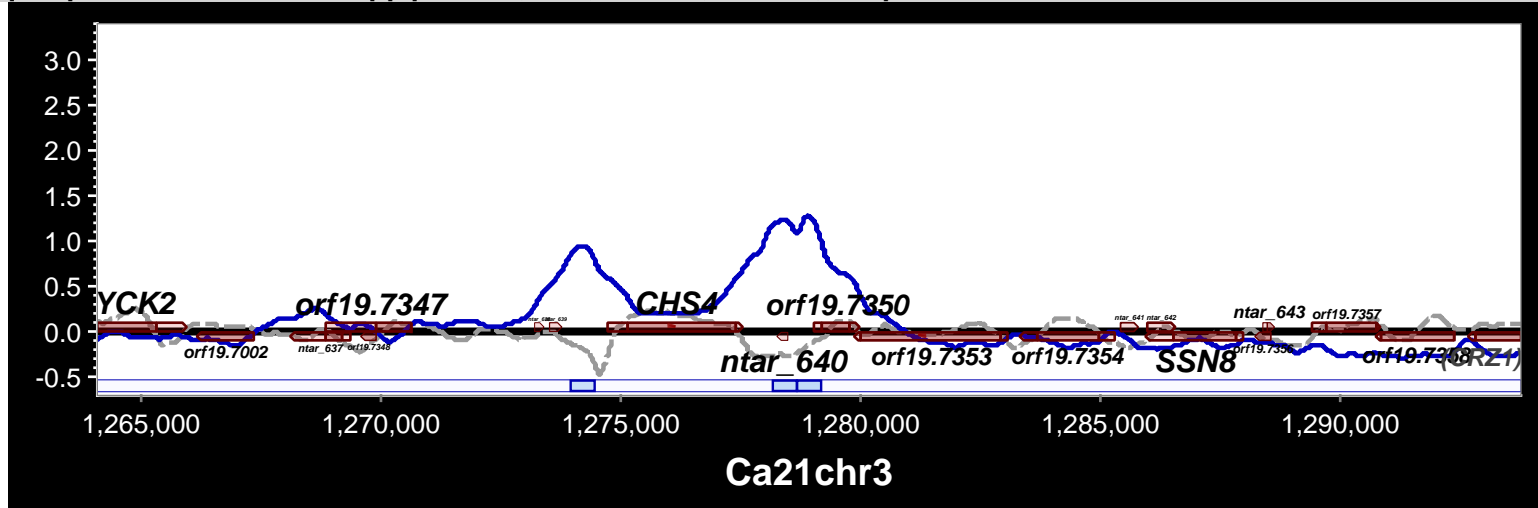

[1.269] Ca21chr7:402624-432307 [+] [orf19.6527, orf19.6526, orf19.6525, orf19.6528, orf19.6524]

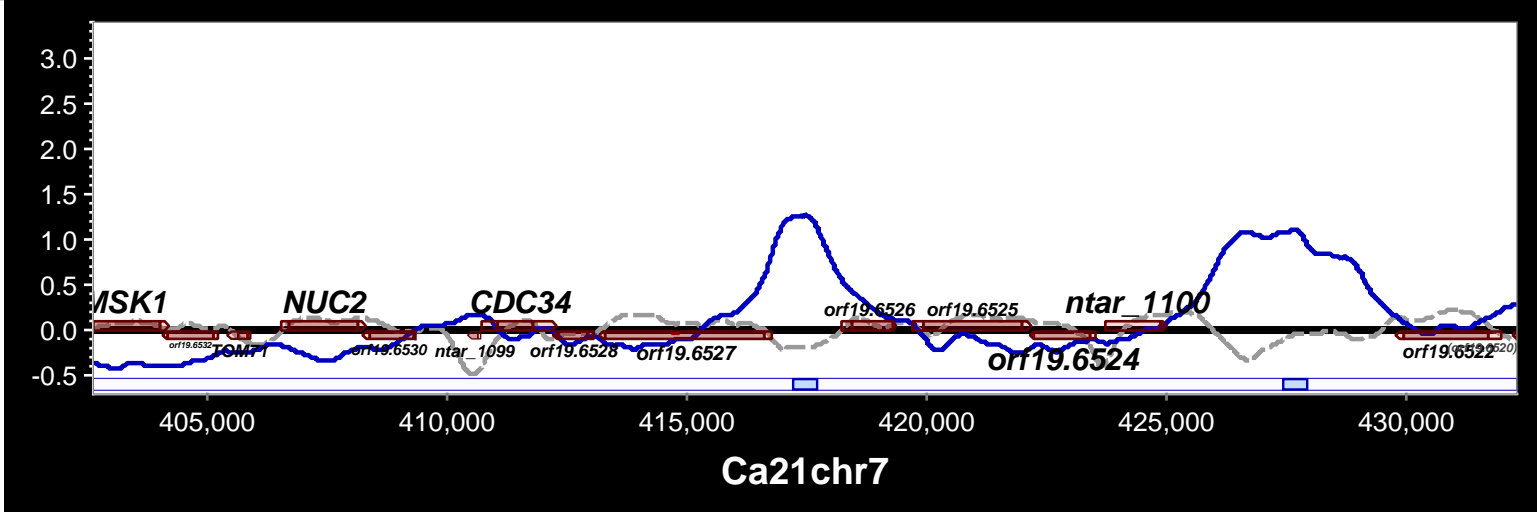

[1.265] Ca21chr2:724034-753717 [+] [ADAEC, orf19.867, orf19.871, RAD32, orf19.872]

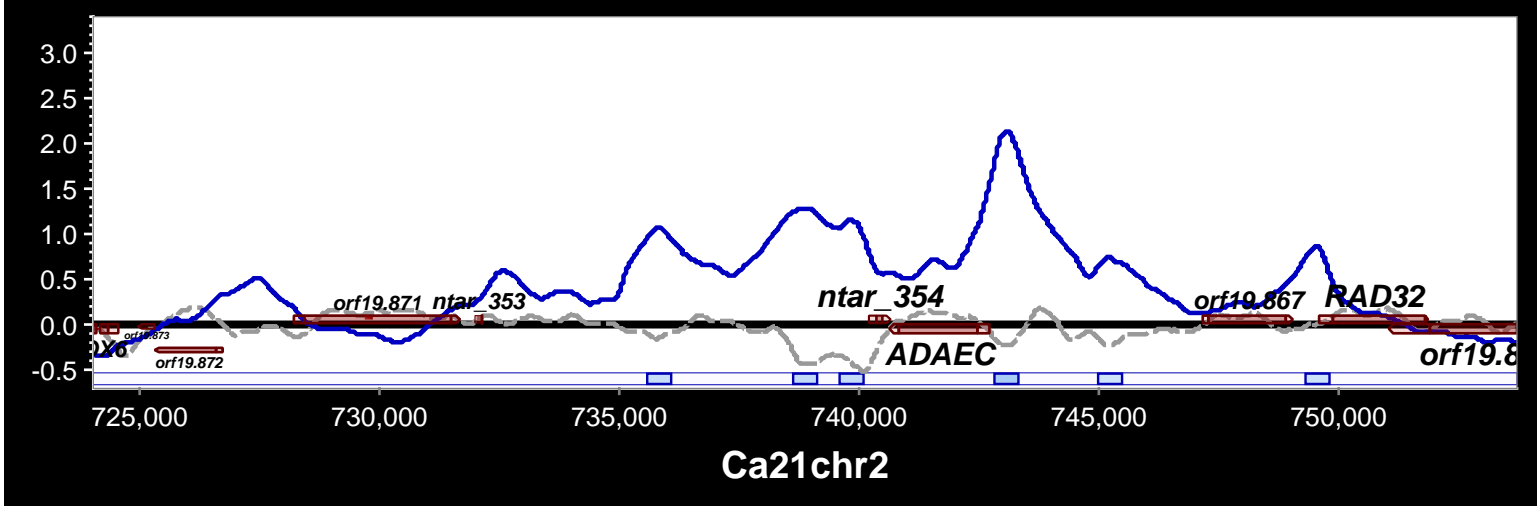

[1.265] Ca21chr3:1199593-1229276 [+] [orf19.6983, orf19.6982, orf19.6981, orf19.6980, orf19.6984]

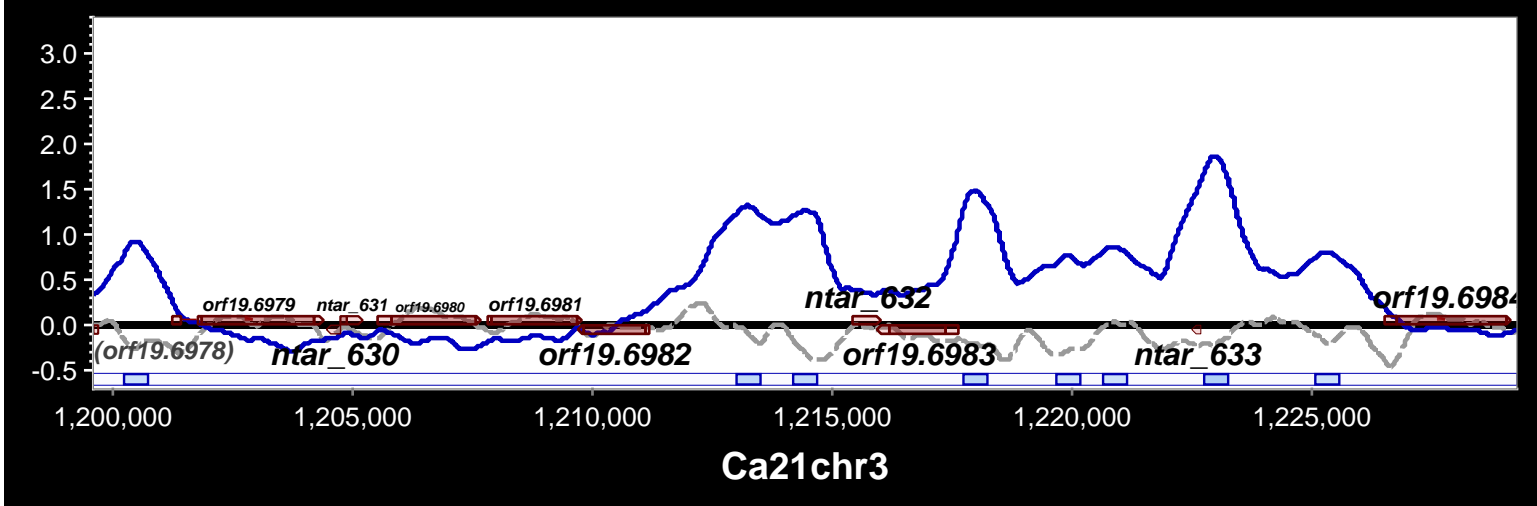

[1.265] Ca21chr5:986619-1016302 [+] [orf19.3945, GRR1, orf19.3946, orf19.3947, RPL43A]

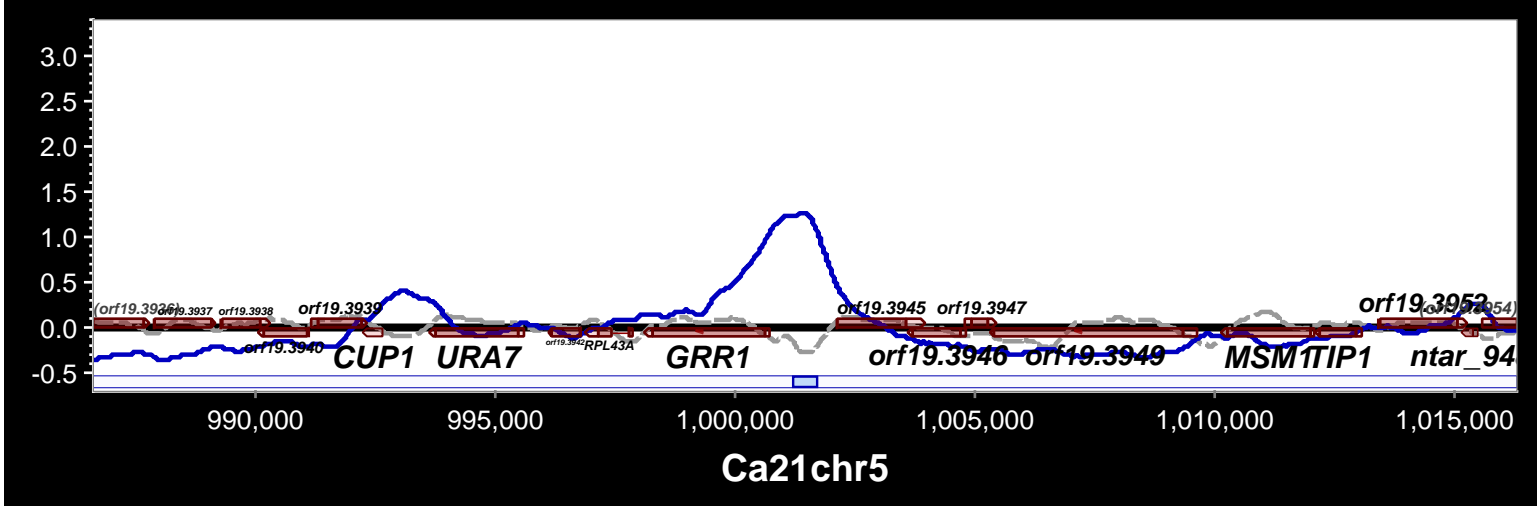

[1.264] Ca21chr4:858908-888591 [+] [PGA31, PGA30, orf19.5304, orf19.5300, RHD3]

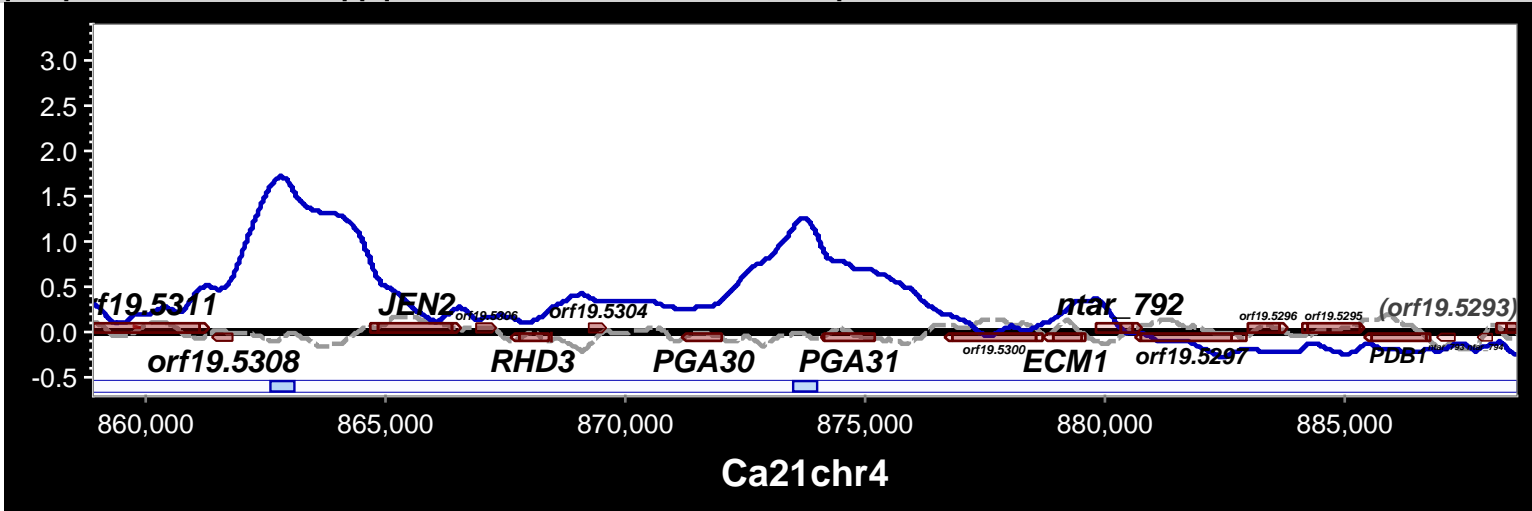

[1.256] Ca21chr6:113957-143640 [+] [FAT1, COX15, PGK1, orf19.3649, orf19.3658]

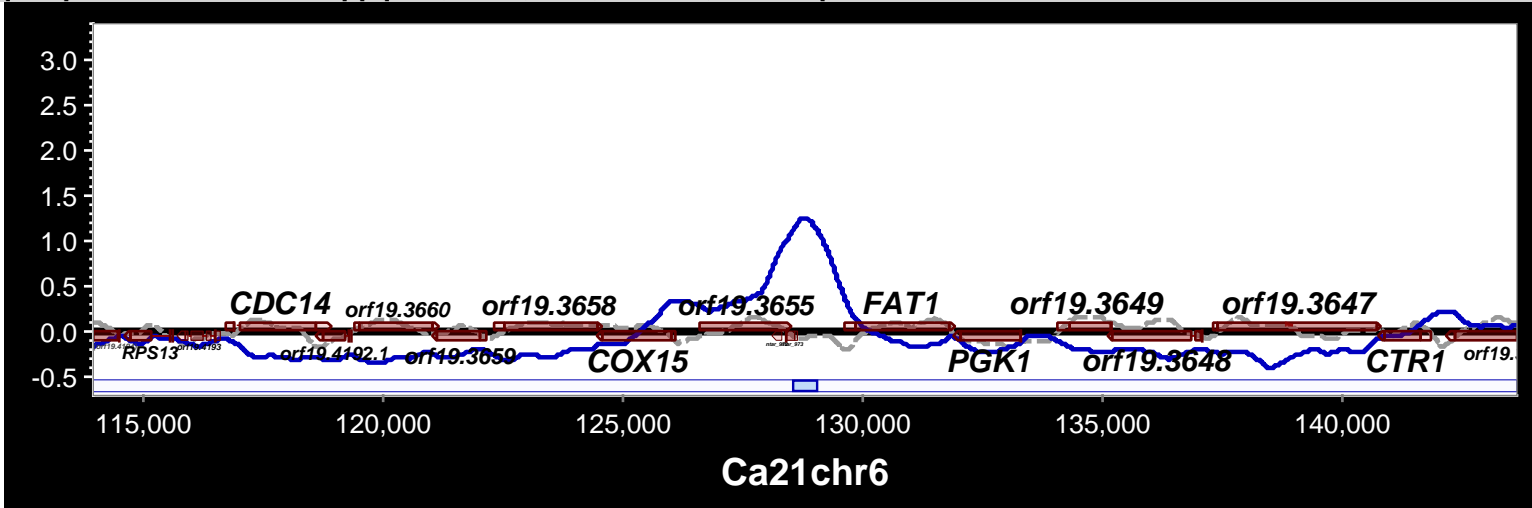

[1.253] Ca21chr3:117438-147121 [+] [PMA1, orf19.5381, orf19.5382, LYS144, CHS8]

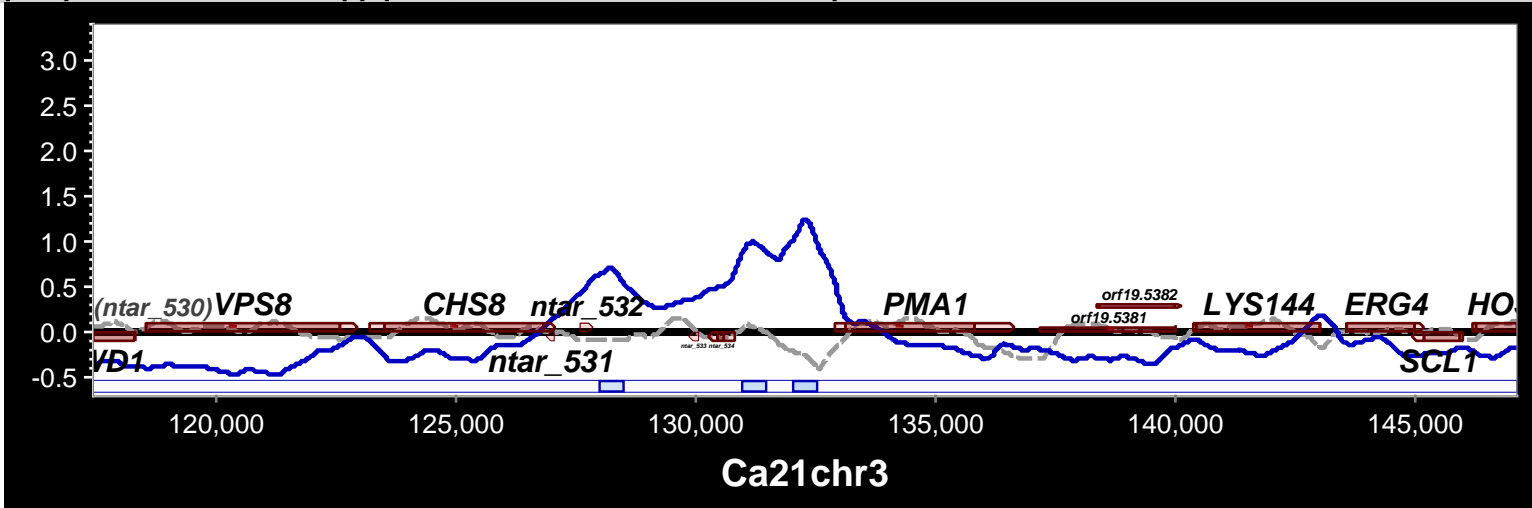

[1.253] Ca21chr5:234875-264558 [+] [orf19.1959, CLN3, CYC3, orf19.1961, orf19.1956]

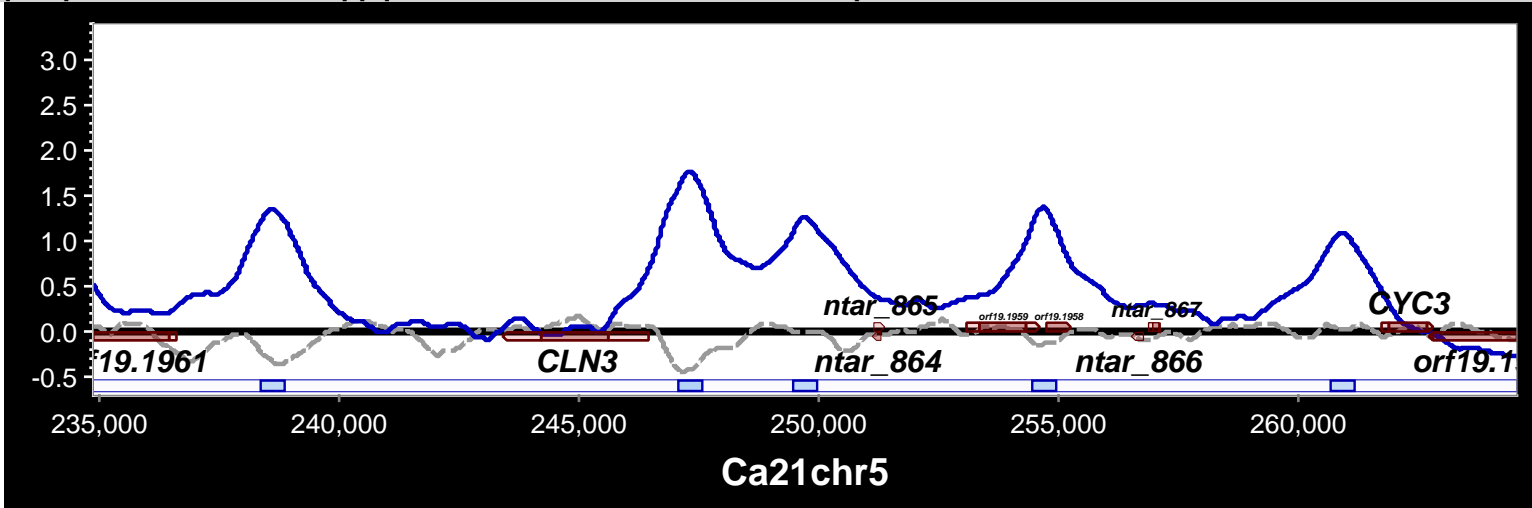



[1.249] Ca21chr1:1357705-1387388 [+] [orf19.6267, orf19.6266, orf19.6268, RPS14B, RPS22A]

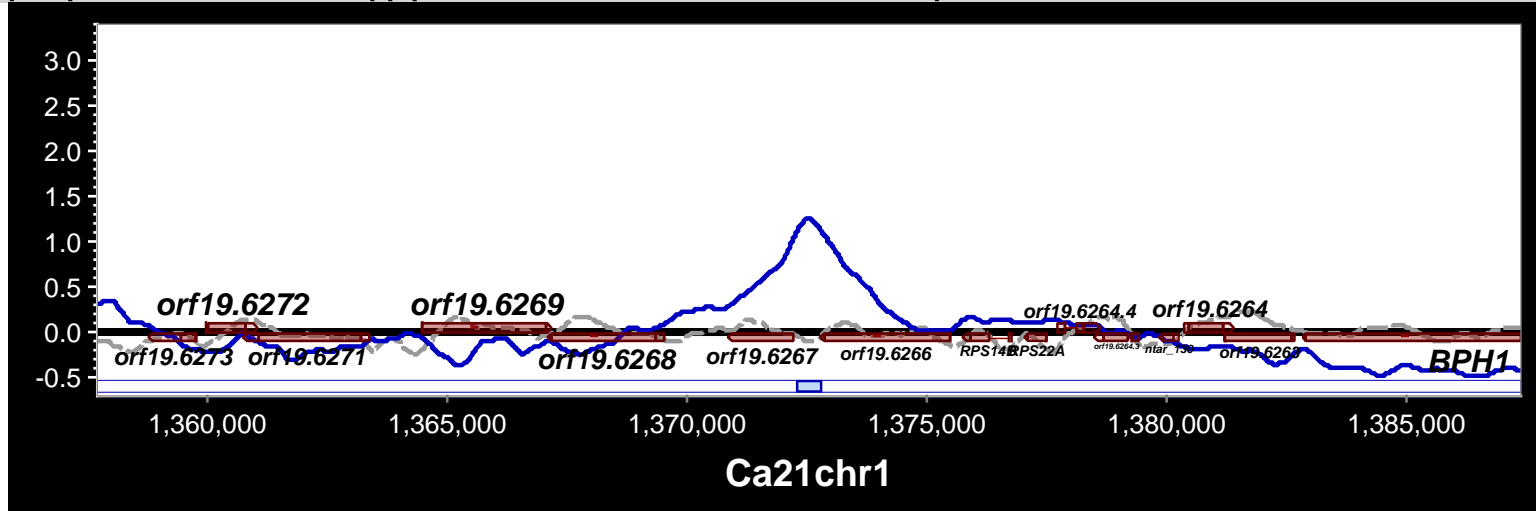

[1.249] Ca21chr5:140860-170543 [+] [RMT2, orf19.921, TFB3, SPE2, ERG11]

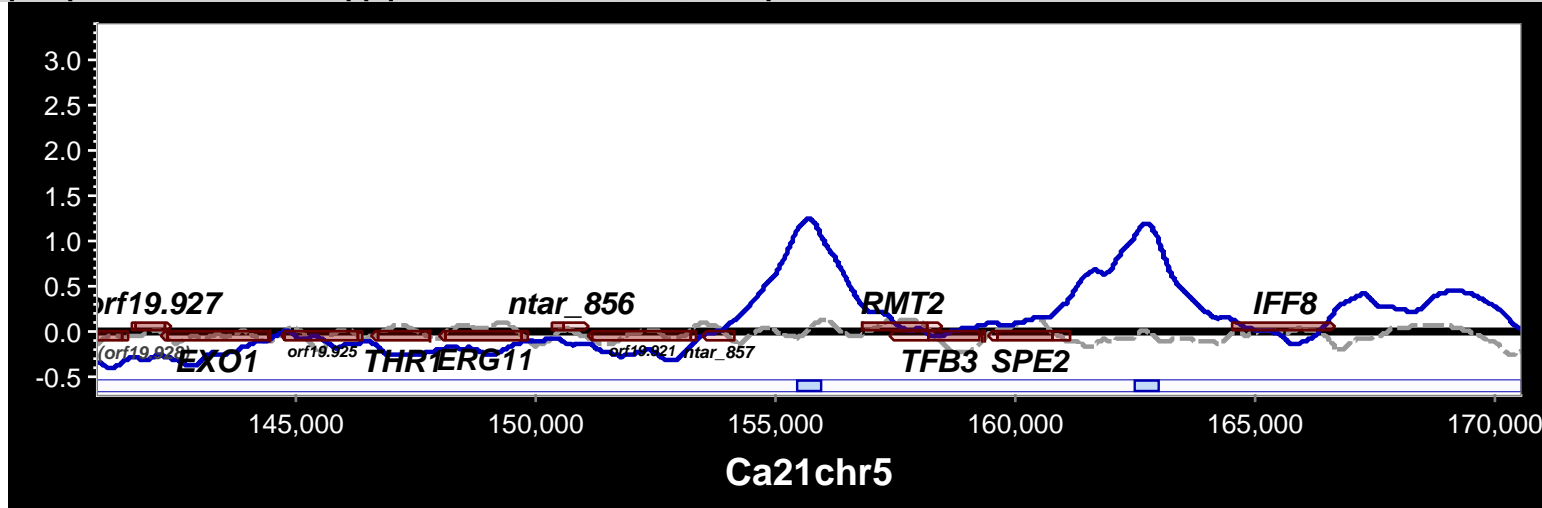

[1.247] Ca21chrR:2075678-2105361 [+] [ALO1, orf19.7552, orf19.7553, orf19.7554, orf19.7556]

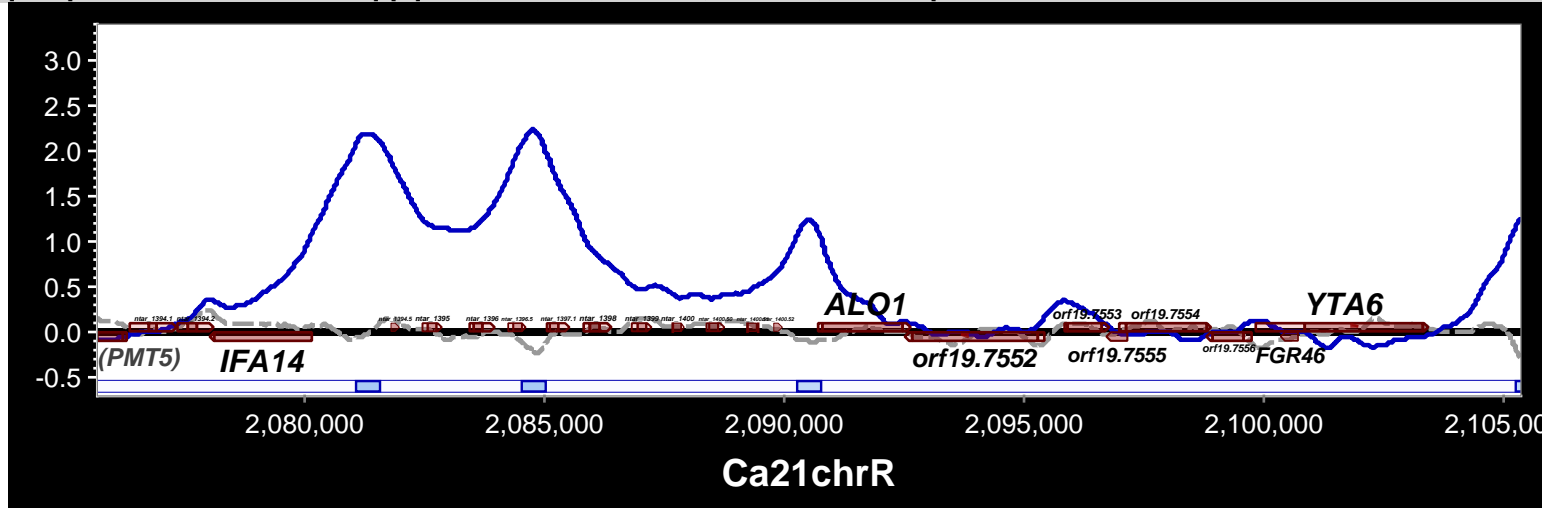

[1.246] Ca21chr7:94628-124311 [+] [orf19.7056, orf19.7054, GAC1, orf19.7057, orf19.7058]

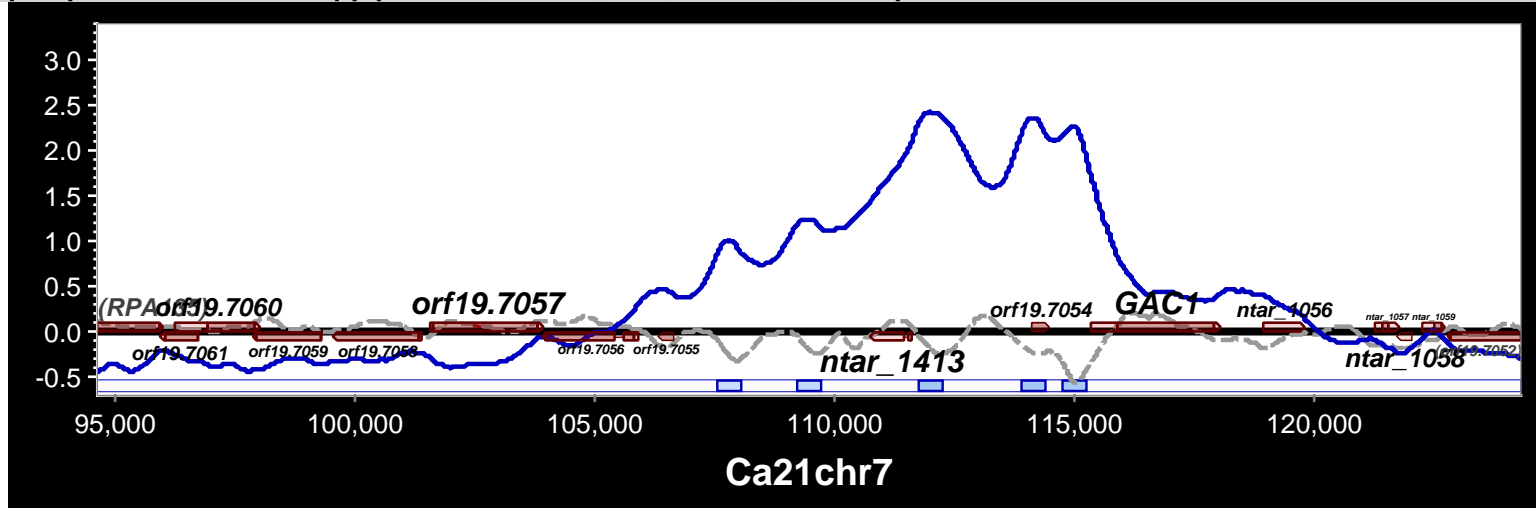

[1.243] Ca21chr4:989779-1019462 [+] [orf19.3815, orf19.3813, tQ(UUG)5, tQ(UUG)4, SSZ1]

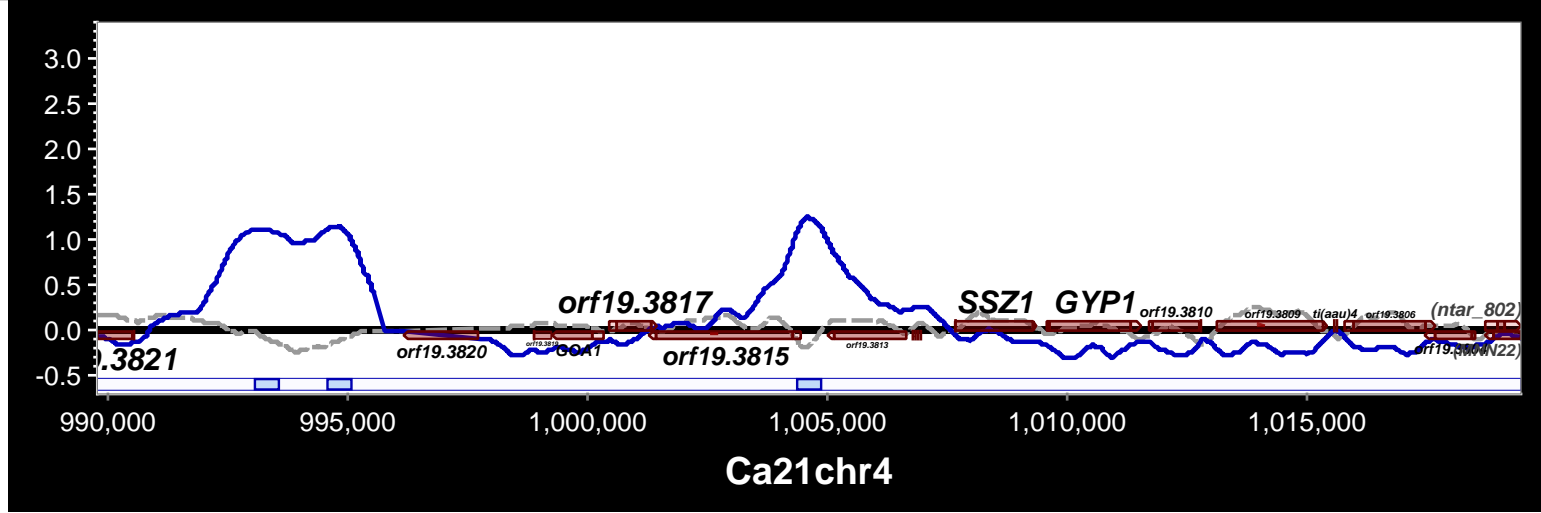

[1.242] Ca21chr6:873301-902984 [+] [orf19.1214, orf19.1212, orf19.1215, orf19.1210, orf19.1217]

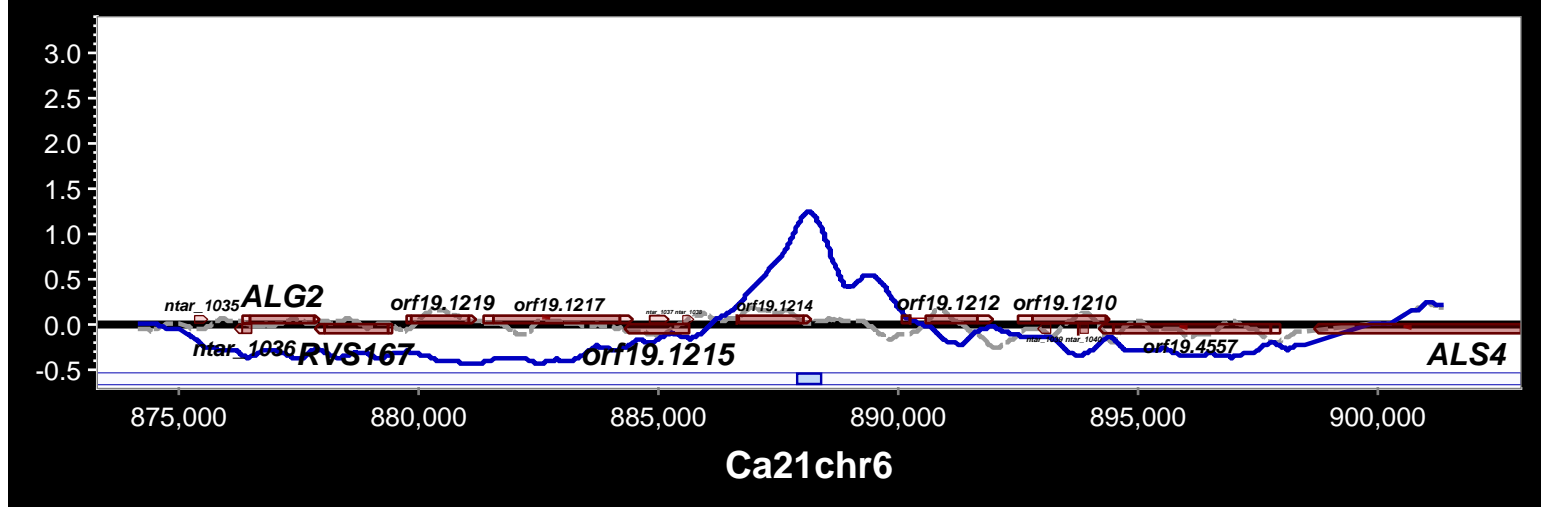

[1.242] Ca21chr6:910476-940159 [+] [orf19.1075, orf19.1075.1, orf19.73, ATM1, SEC5]

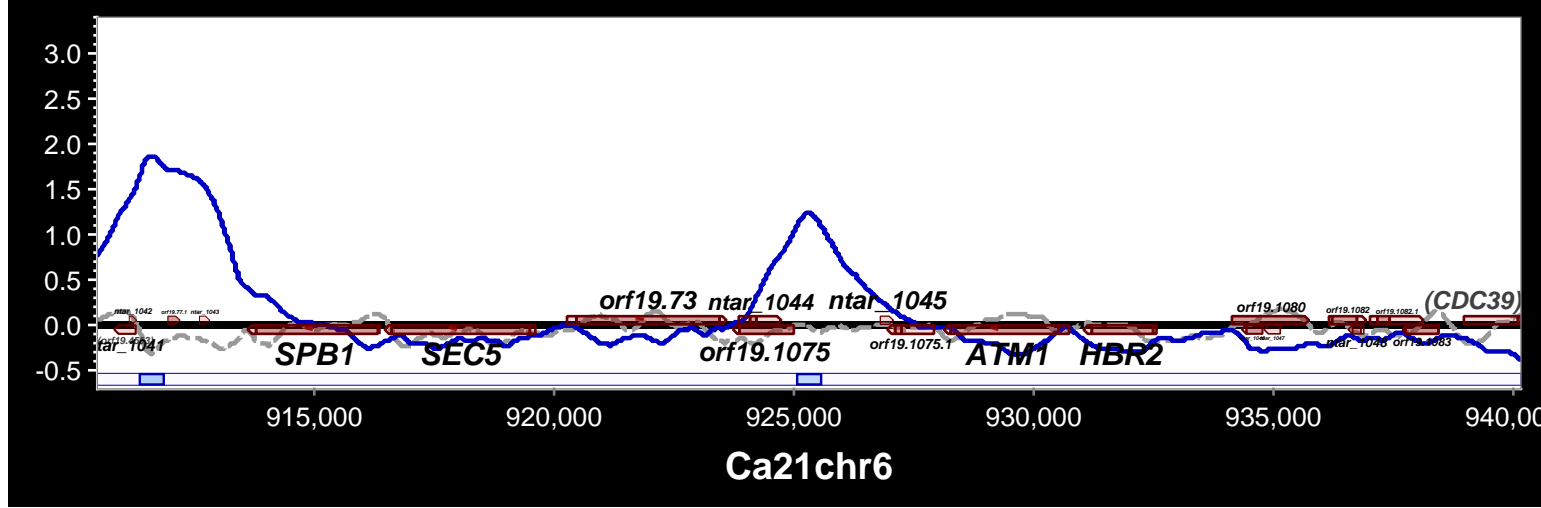

[1.241] Ca21chr2:1162913-1192596 [+] [orf19.6888, orf19.6887, orf19.6886, MKK2, SPO7]

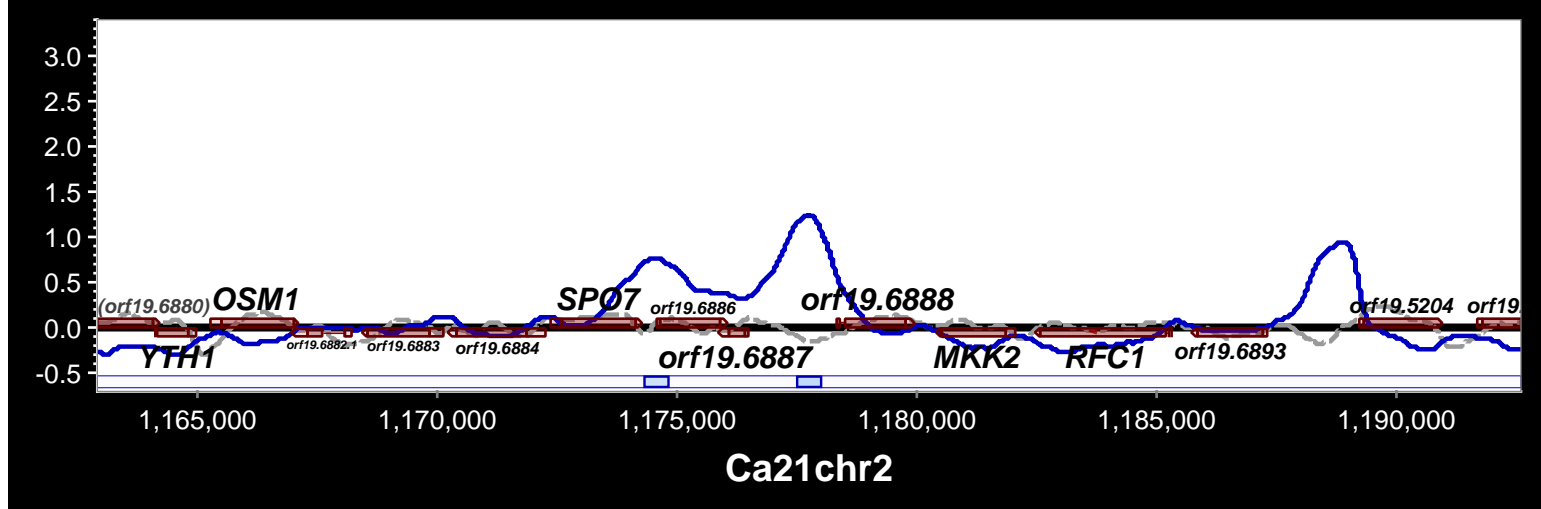

[1.238] Ca21chr6:822345-852028 [+] [SNQ2, IHD1, PGA61, tA(UGC)2, SAL6]

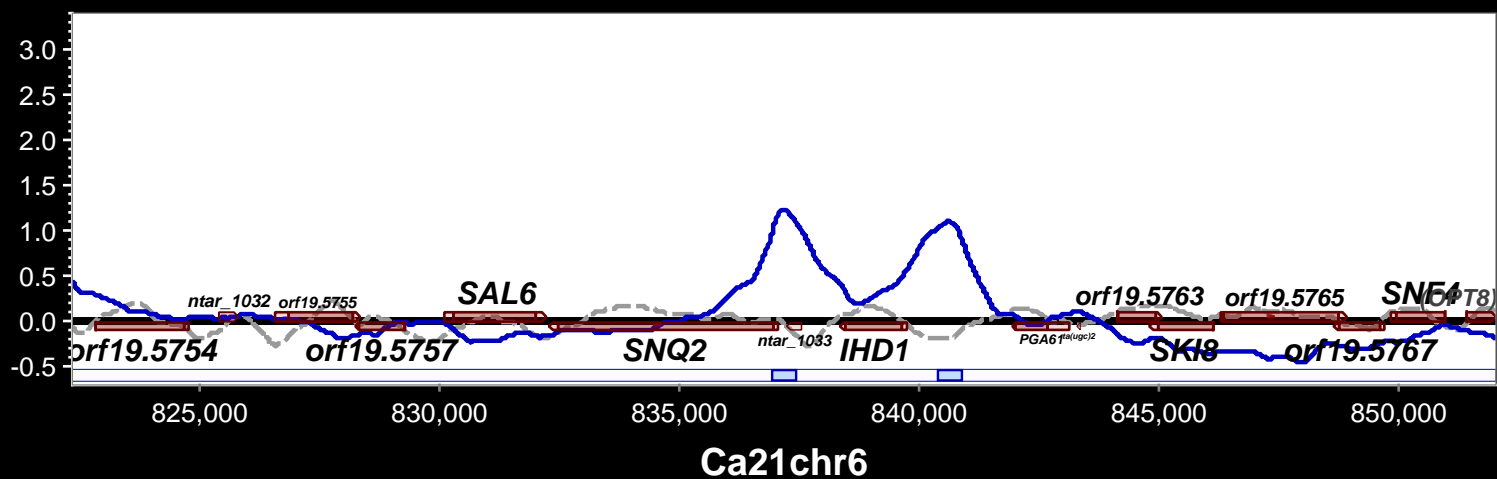

[1.236] Ca21chr1:1071378-1101061 [+] [orf19.450, GAT2, orf19.449, orf19.448, orf19.446.2]

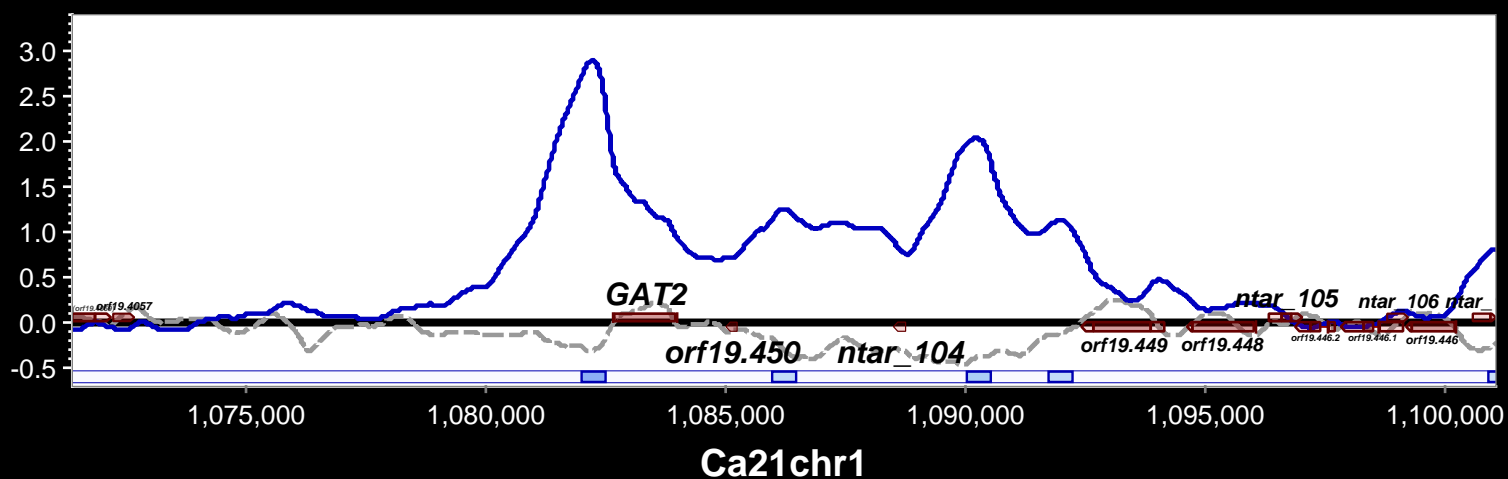

[1.235] Ca21chr3:29293-58976 [+] [orf19.5438, RHR2, UTP8, orf19.5439, orf19.5433]

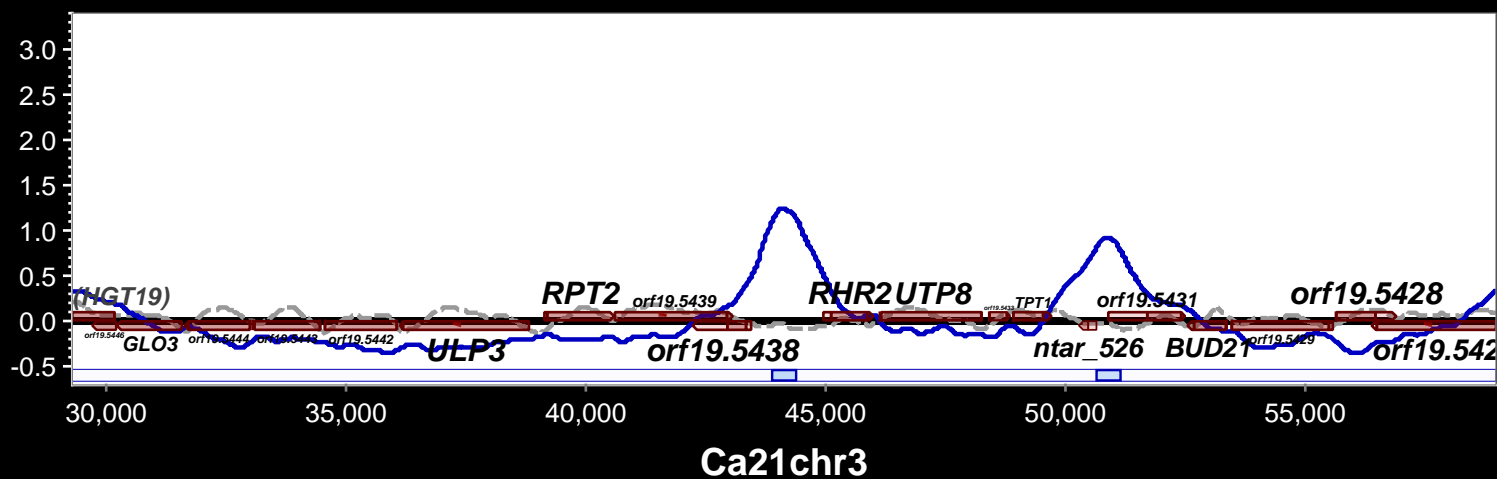

[1.231] Ca21chr1:2940089-2969772 [+] [HSP70, KNS1, orf19.4976, orf19.4981, orf19.4982]

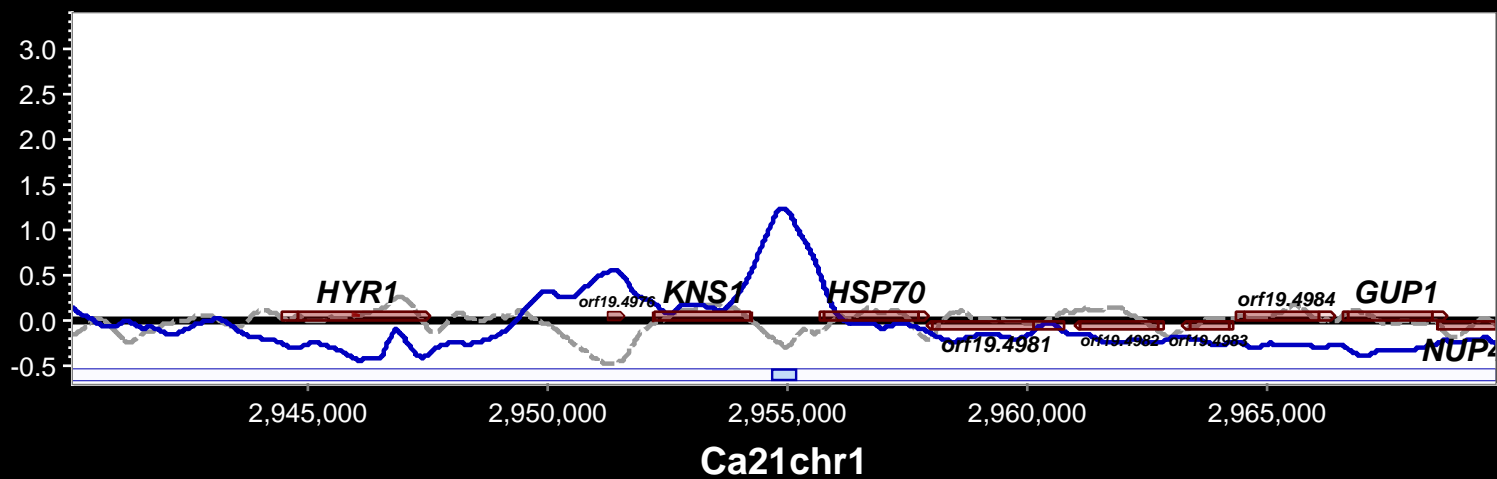

[1.231] Ca21chr3:193024-222707 [+] [orf19.2505, orf19.2506, ARP9, BMS1, orf19.2503]

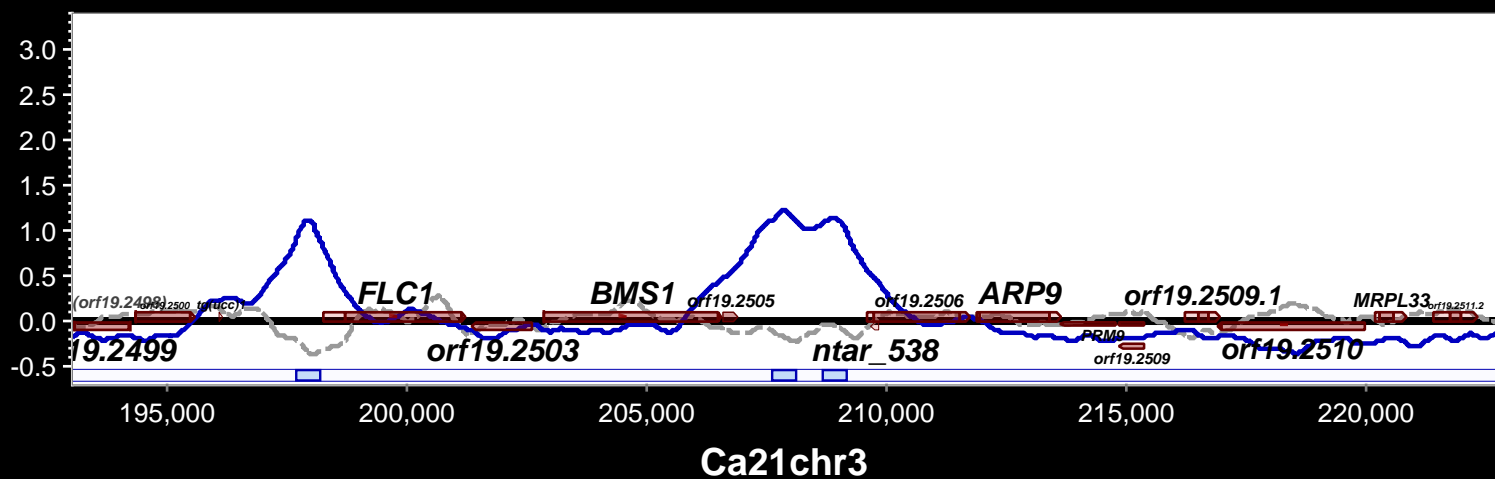

[1.229] Ca21chrR:1244877-1274560 [+] [SFL1, orf19.457, orf19.458, orf19.458.1, ADP1]

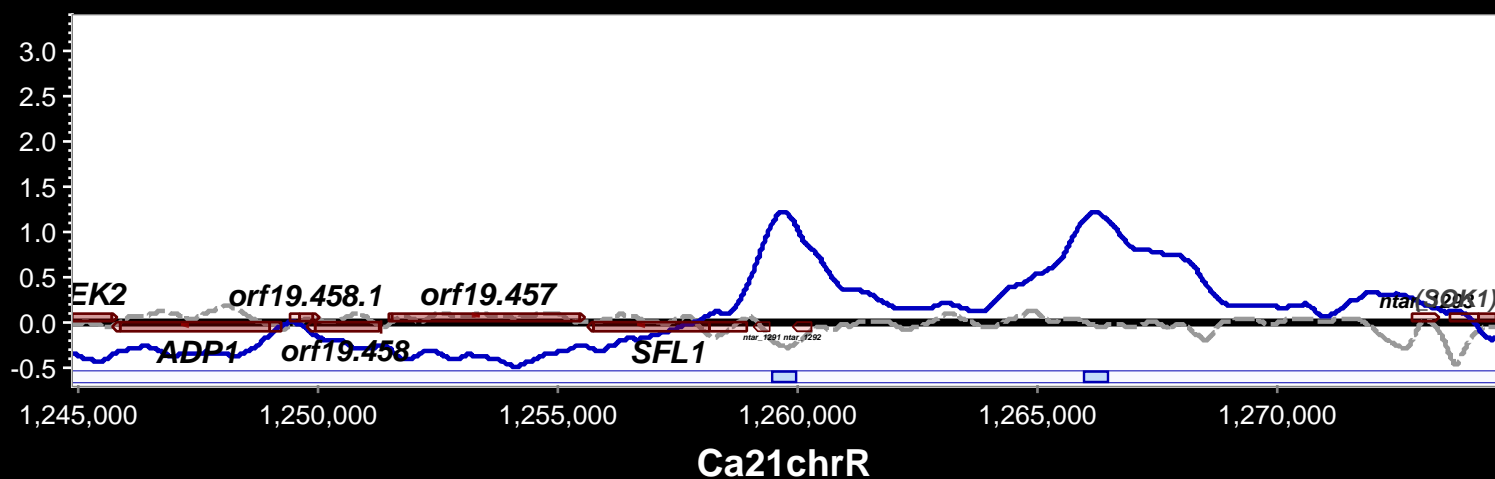

[1.229] Ca21chrR:1251379-1281062 [+] [SOK1, SFL1, orf19.3848, orf19.457, orf19.3851]

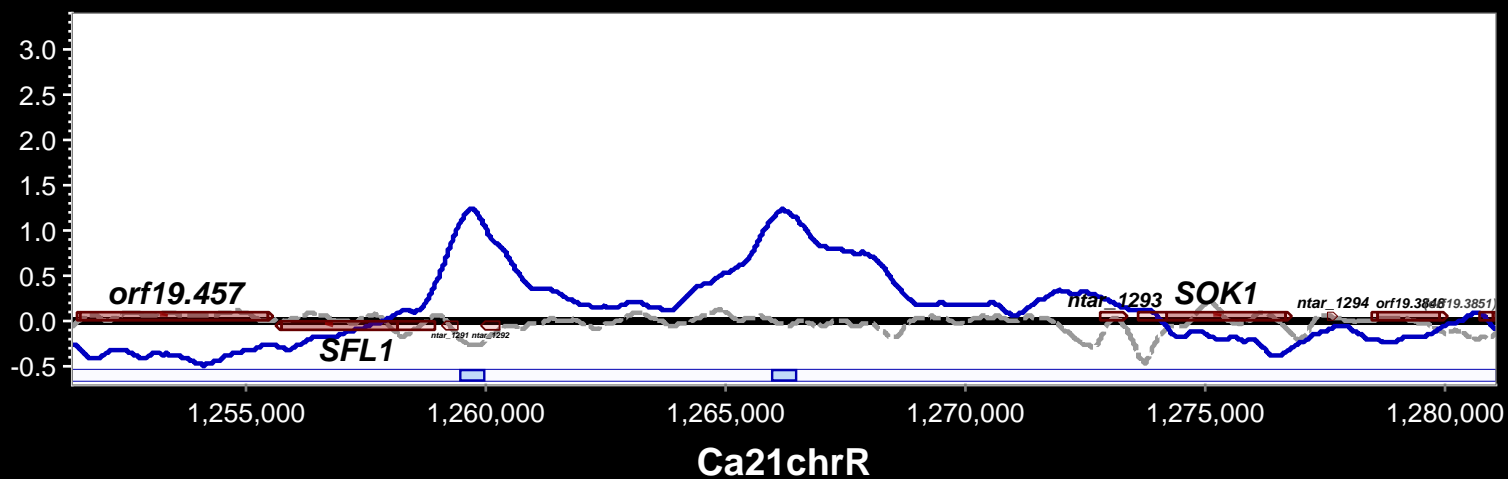

[1.228] Ca21chr3:1263579-1293262 [+] [orf19.7350, CHS4, orf19.7353, orf19.7354, orf19.7347]

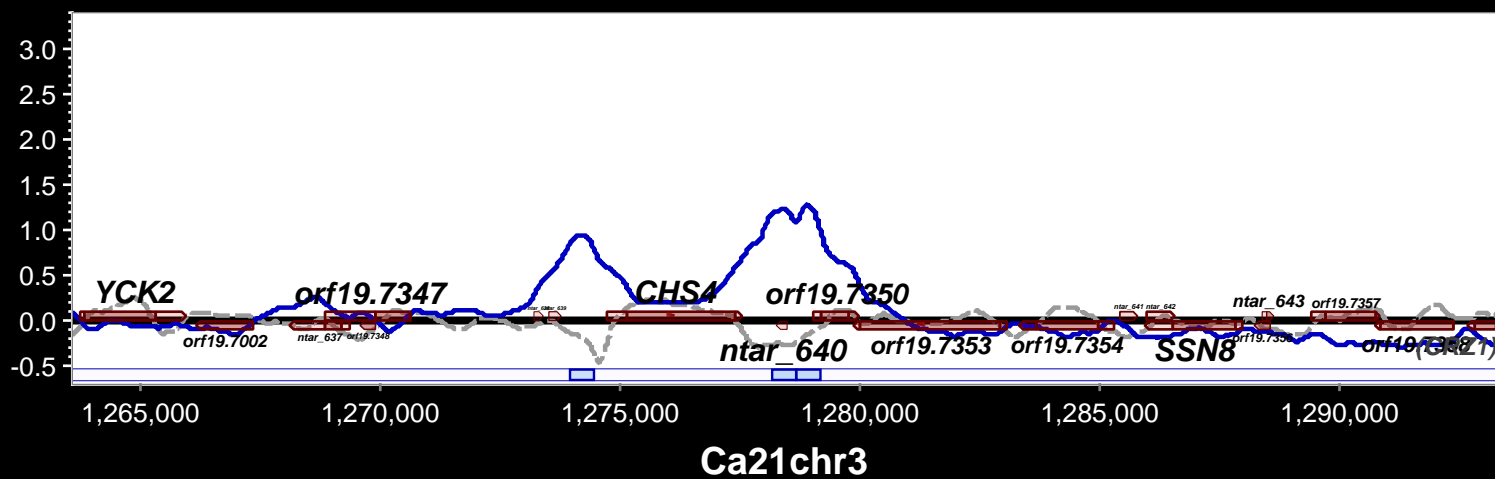

[1.224] Ca21chr1:1228937-1258620 [+] [PHO87, orf19.2455, orf19.2452, orf19.2457, PGA45]

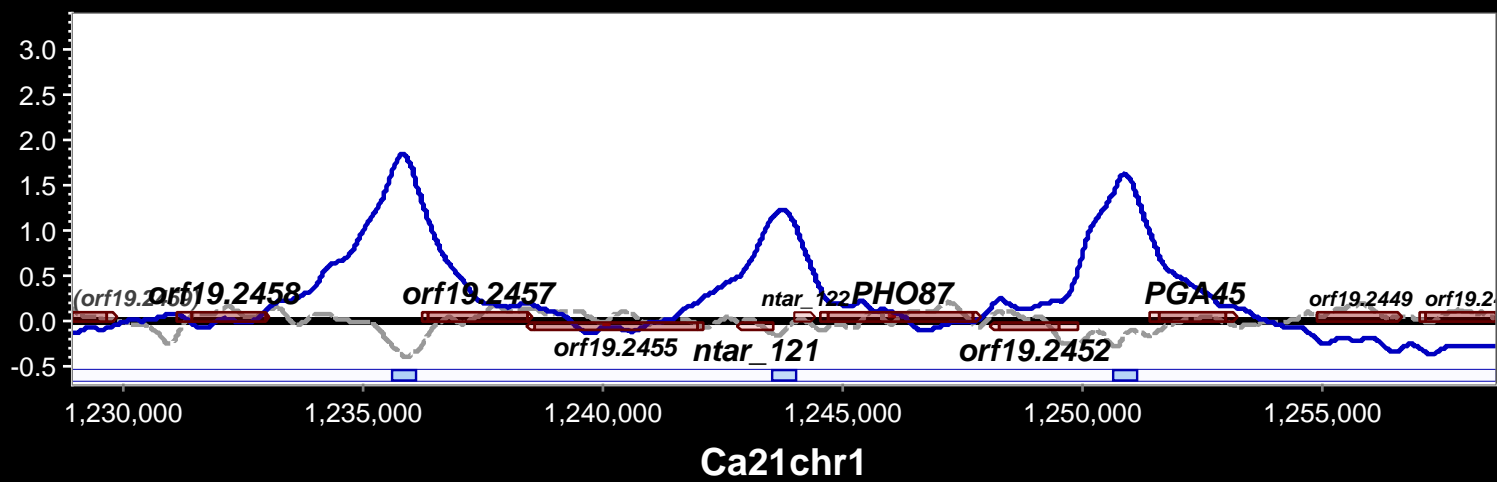

[1.22] Ca21chr1:1851433-1881116 [+] [EAF6, ENO1, orf19.397, orf19.398, orf19.394]

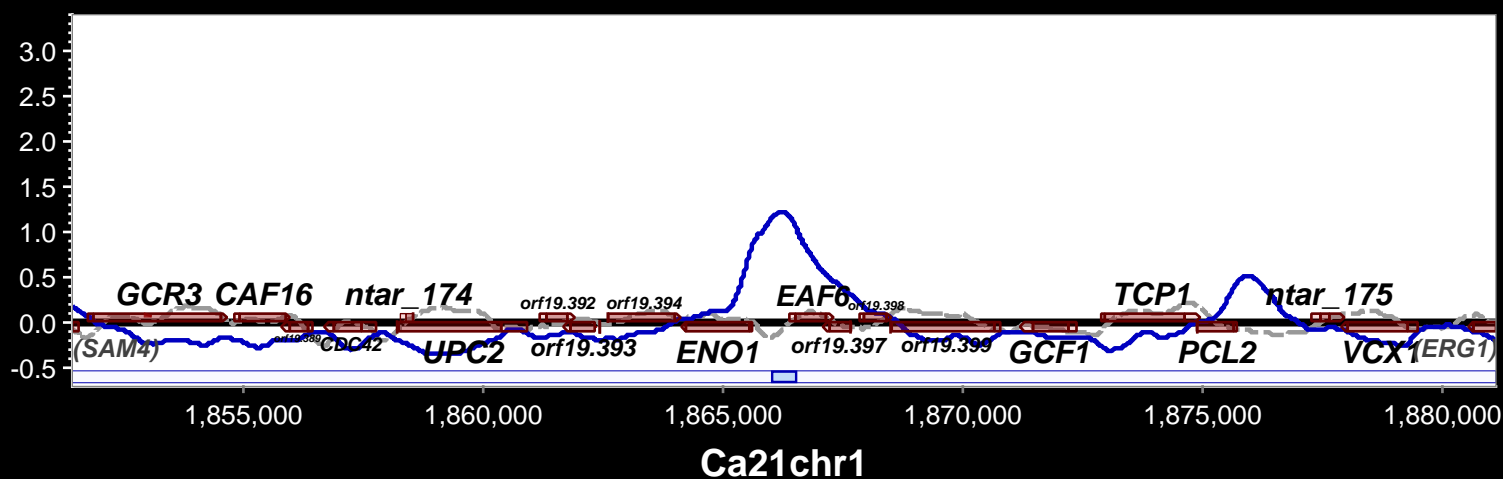

[1.218] Ca21chr1:2500463-2530146 [+] [SAM2, DPP1, GIN1, PHO84, orf19.660]

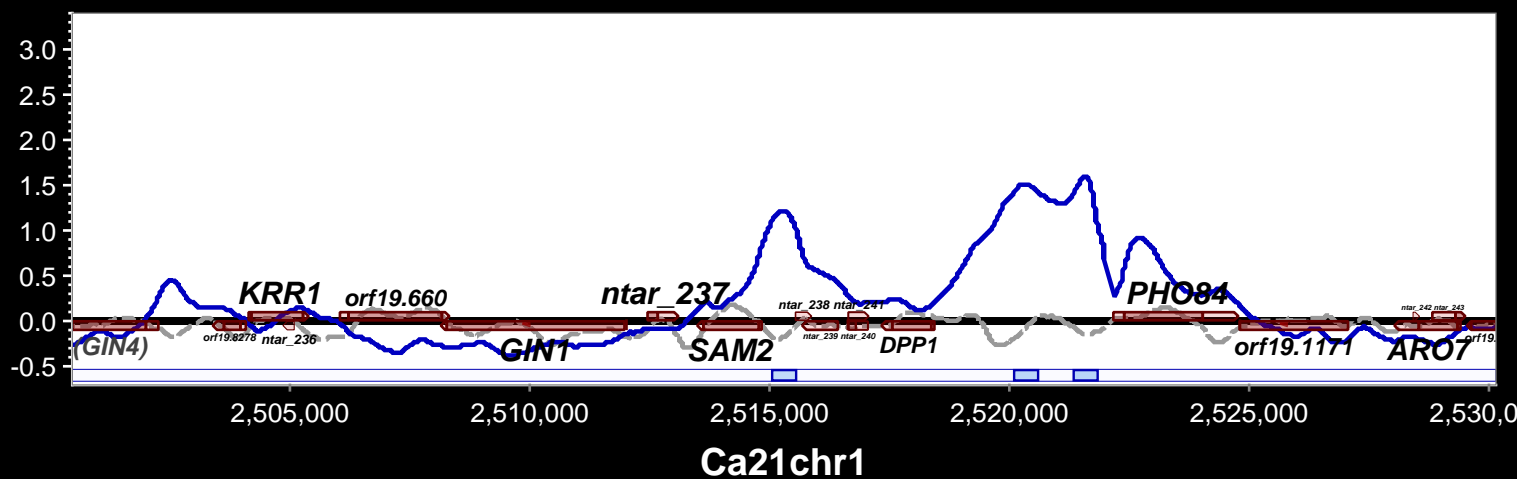

[1.217] Ca21chr1:1272252-1301935 [+] [orf19.2431, HAC1, orf19.2430, orf19.2429, orf19.2433]

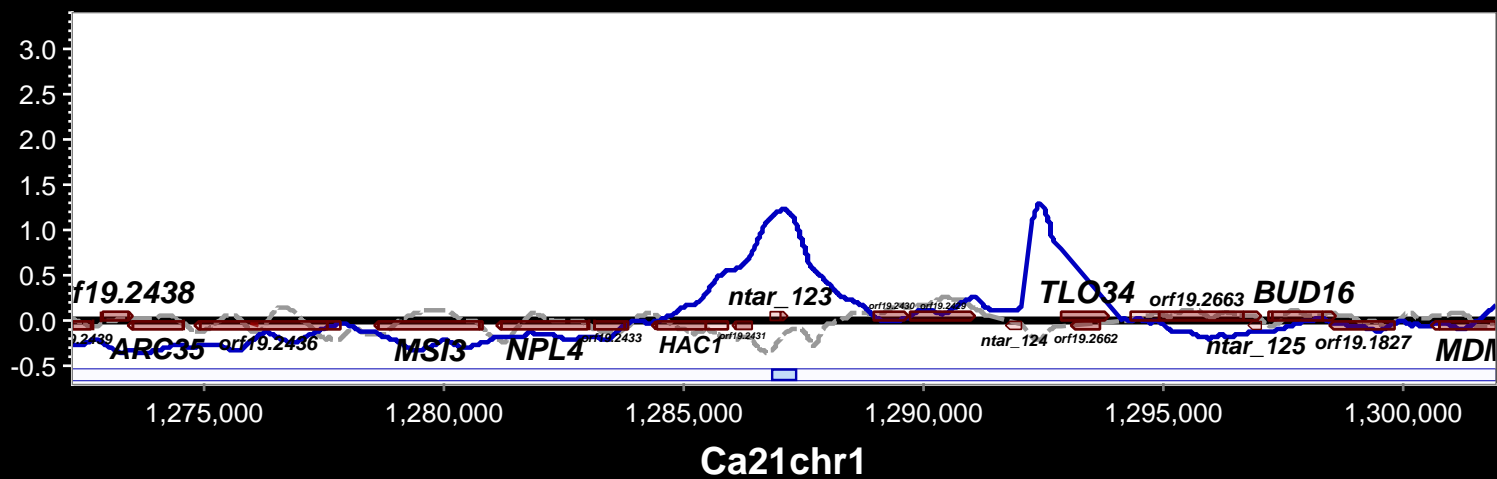

[1.217] Ca21chr6:287206-316889 [+] [orf19.3434, OYE23, orf19.3435, orf19.3432, orf19.3436]

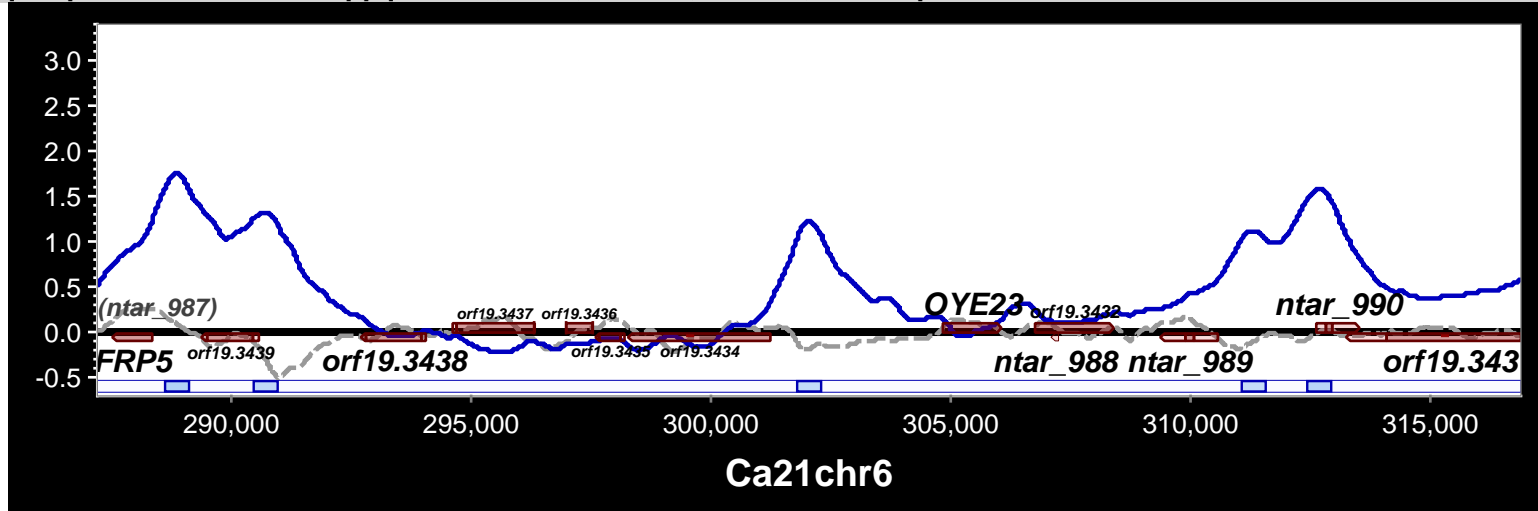

[1.215] Ca21chr1:3150077-3179760 [+] [orf19.7252, WSC4, orf19.7254, orf19.7250, RPC10]

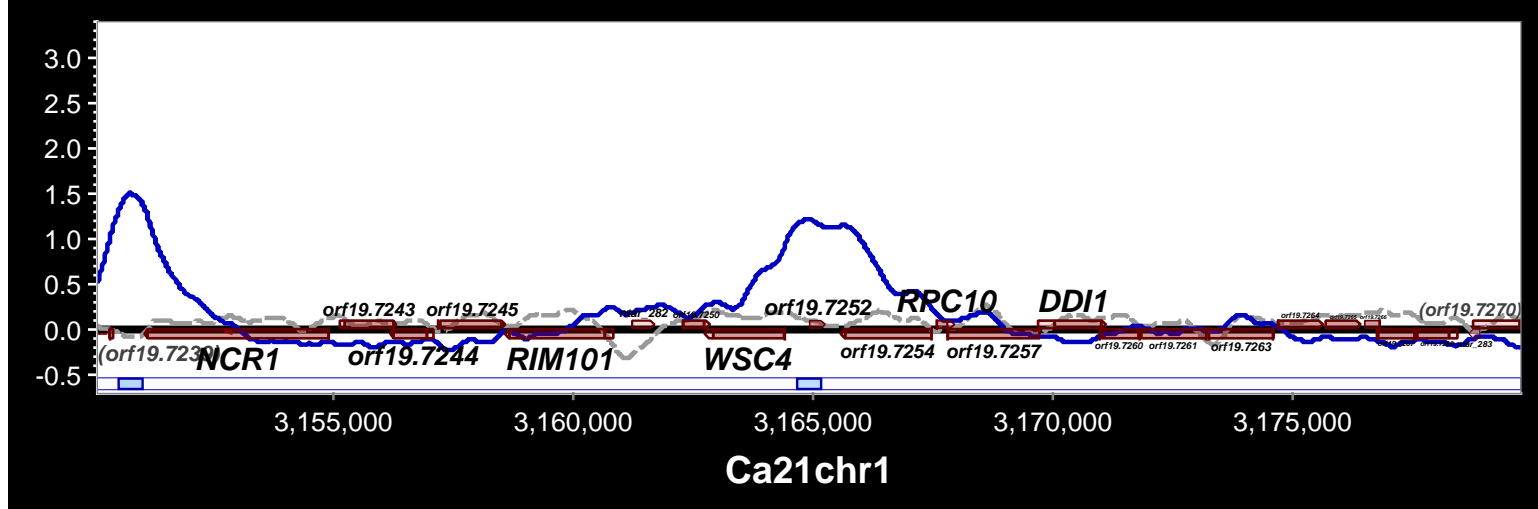

[1.212] Ca21chr2:2083949-2113632 [+] [RAS1, PHO23, orf19.1761, OCA1, orf19.1757]

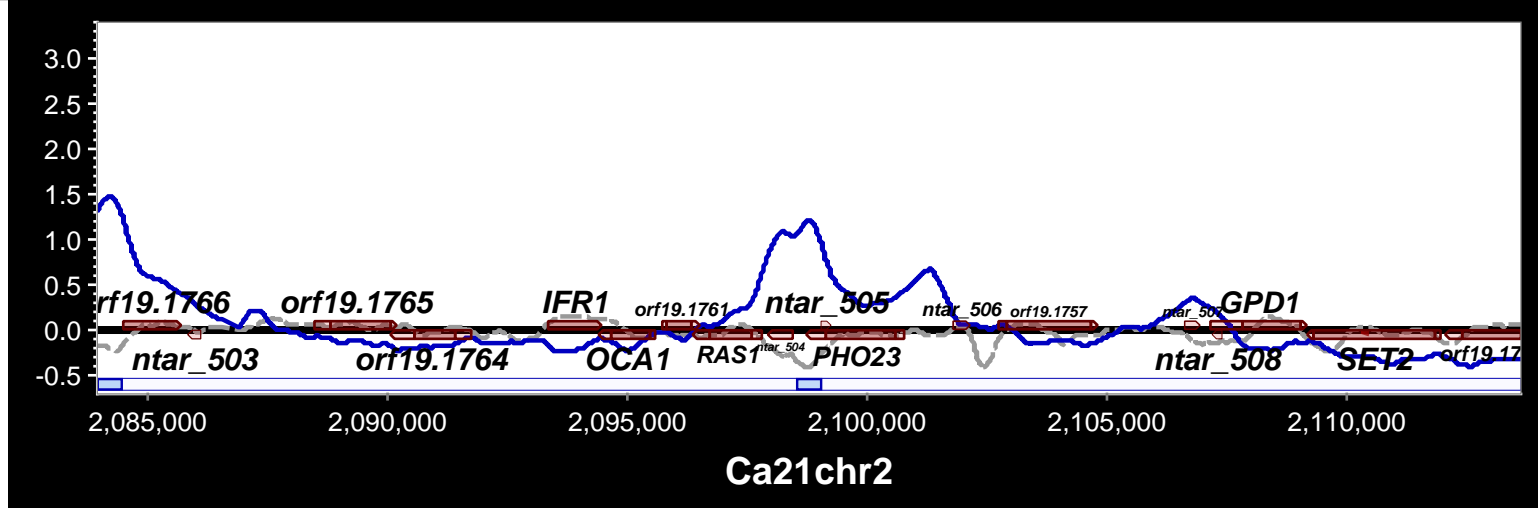

[1.208] Ca21chr4:1304988-1334671 [+] [PPS1, PGA49, tT(UGU)2, orf19.4406, orf19.4407]

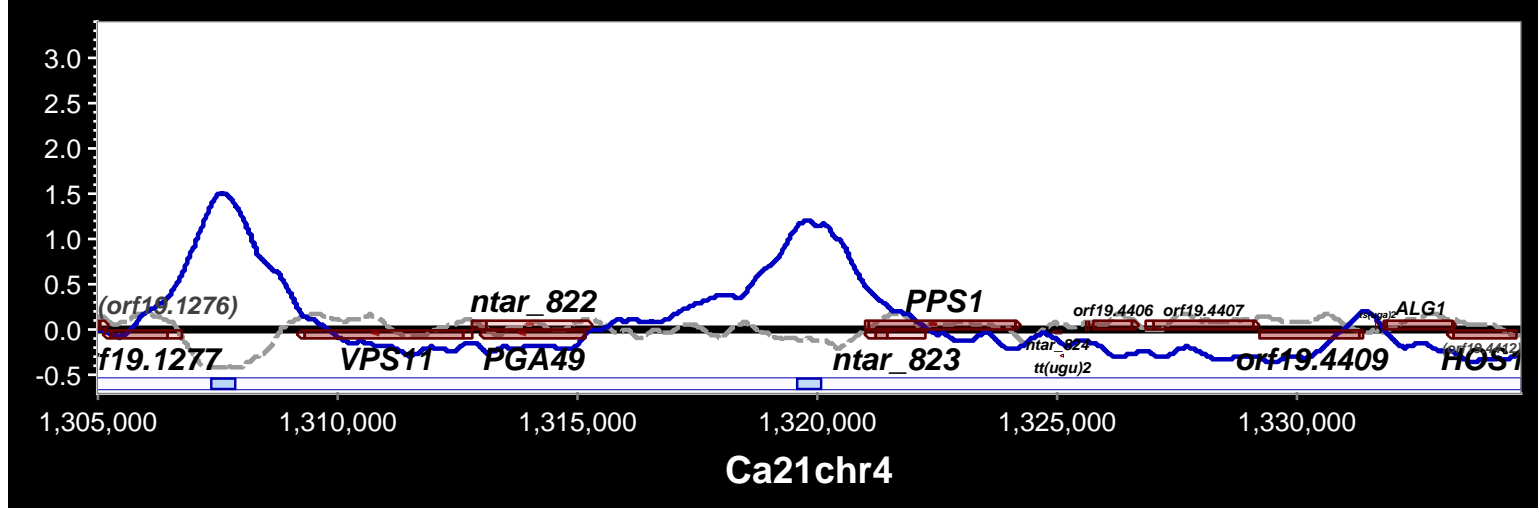

[1.208] Ca21chr4:1441336-1471019 [+] [MNN4, XUT1, CSO99, IFF5, PGA15]

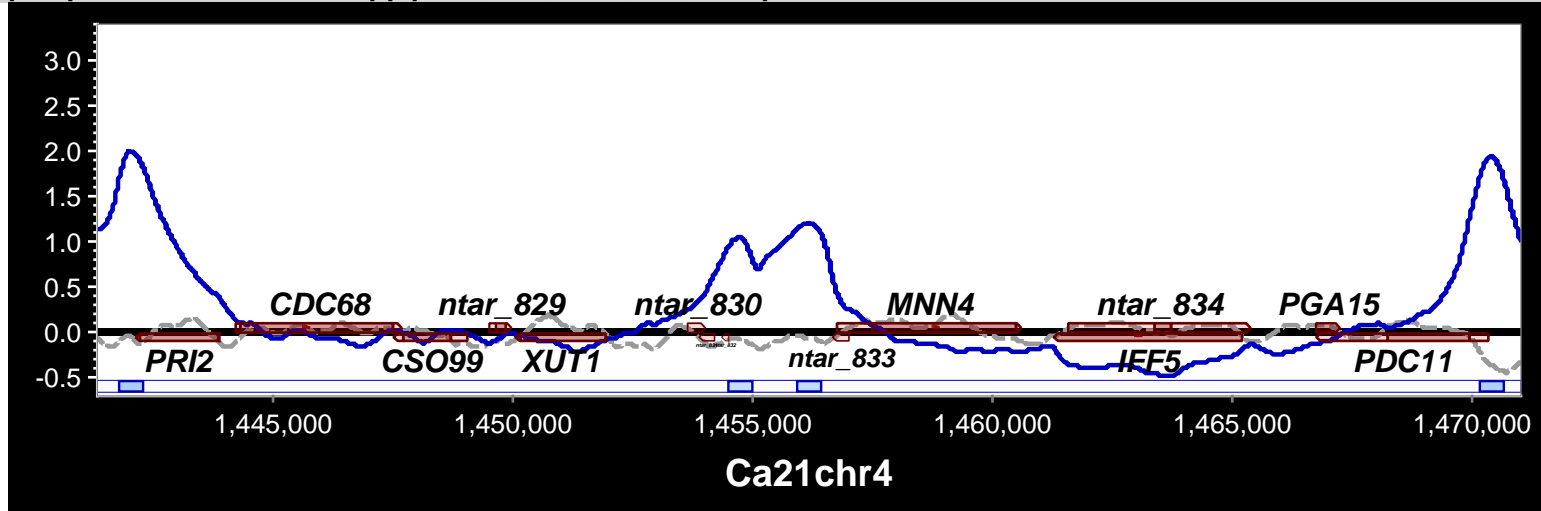

[1.205] Ca21chr2:590634-620317 [+] [RNR21, orf19.5802, orf19.5799, HYU1, LIG4]

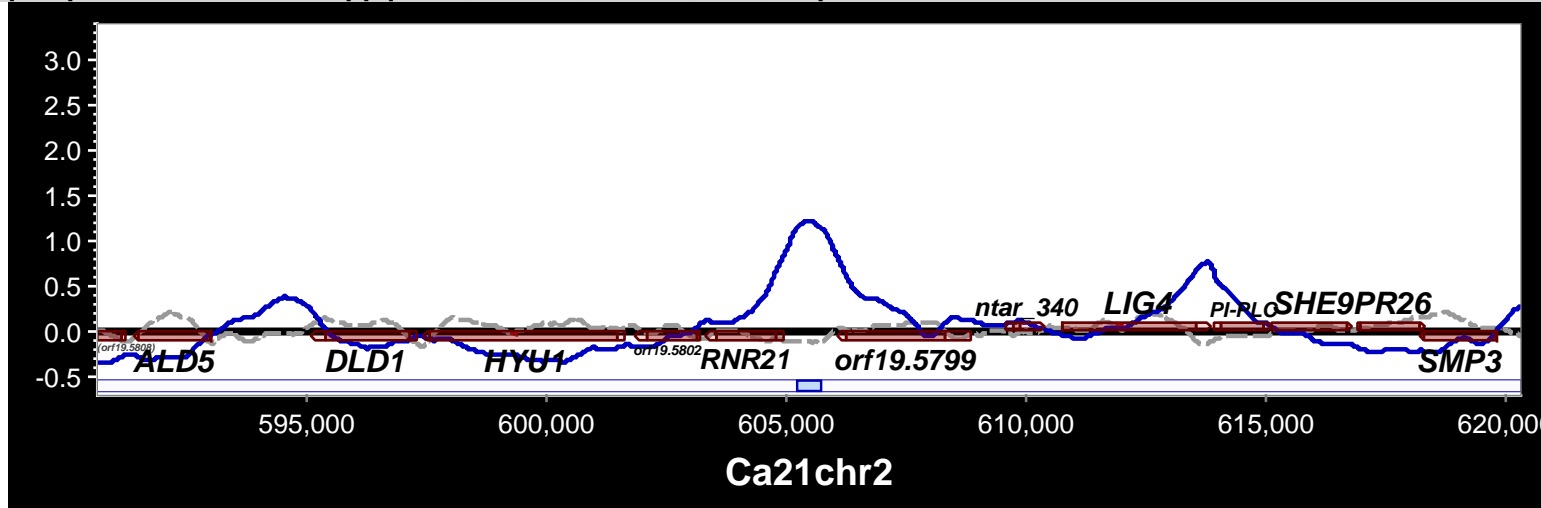

[1.197] Ca21chrR:541011-570694 [+] [orf19.173, orf19.175, OPT4, RPC19, DBP2]

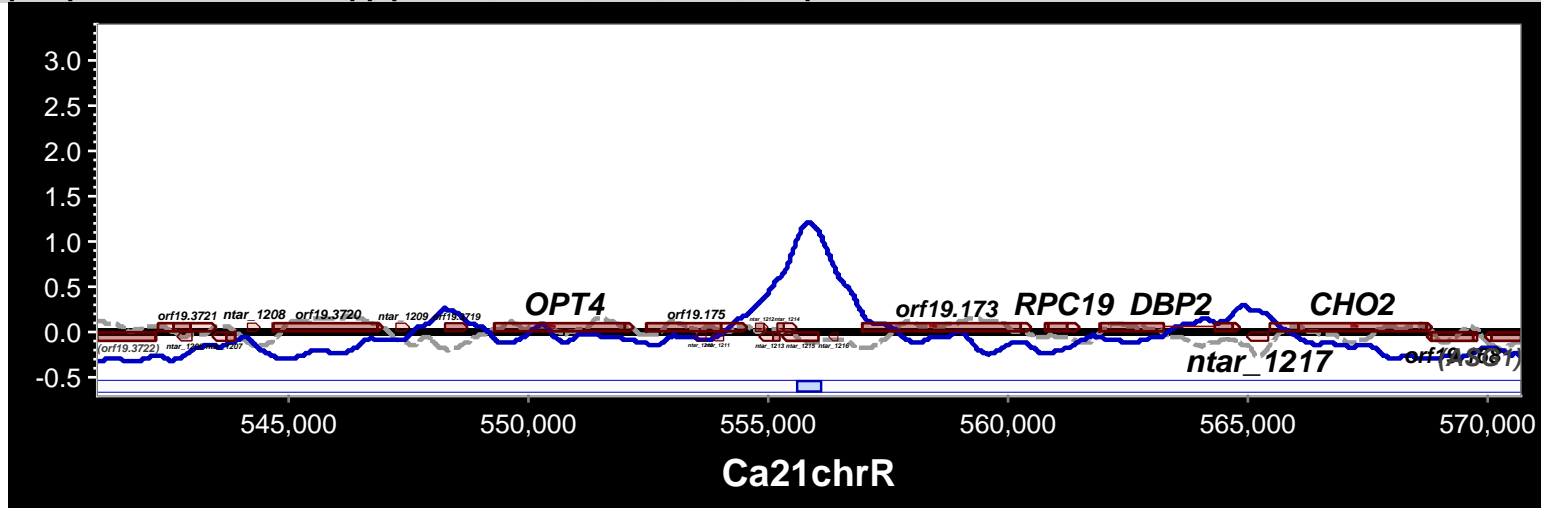

[1.192] Ca21chr5:87287-116970 [+] [orf19.938, orf19.936, NAM7, BUD2, AGA1]

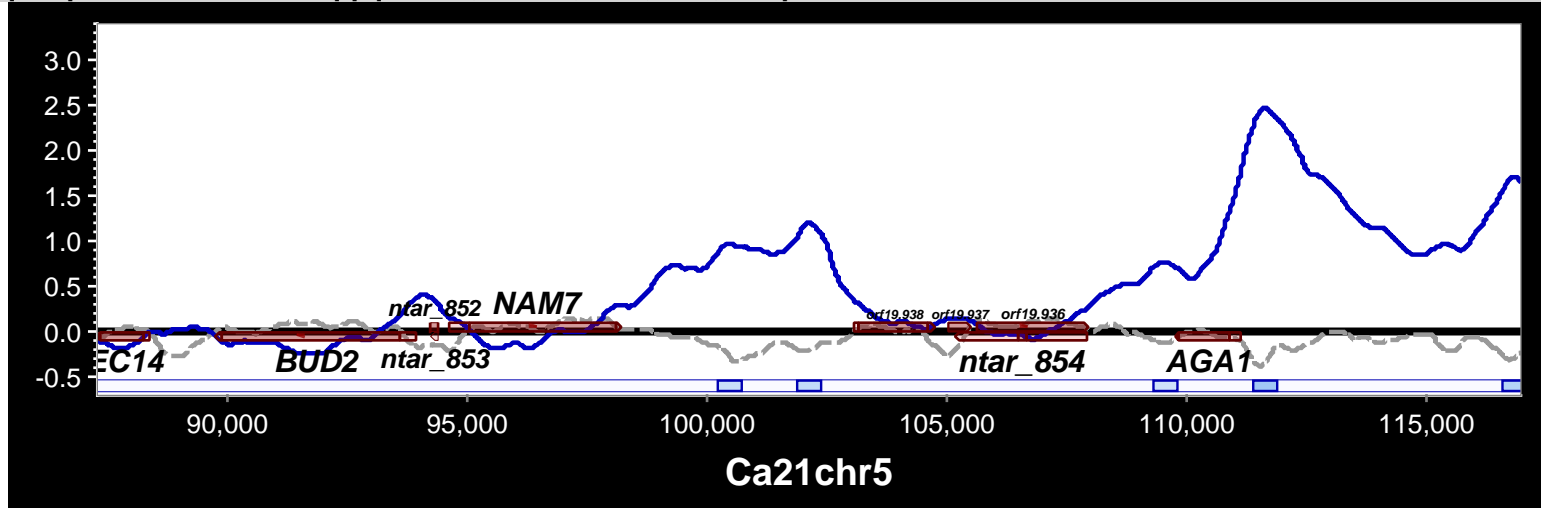

[1.191] Ca21chr5:147898-177581 [+] [IFF8, SPE2, TFB3, RMT2, HYR3]

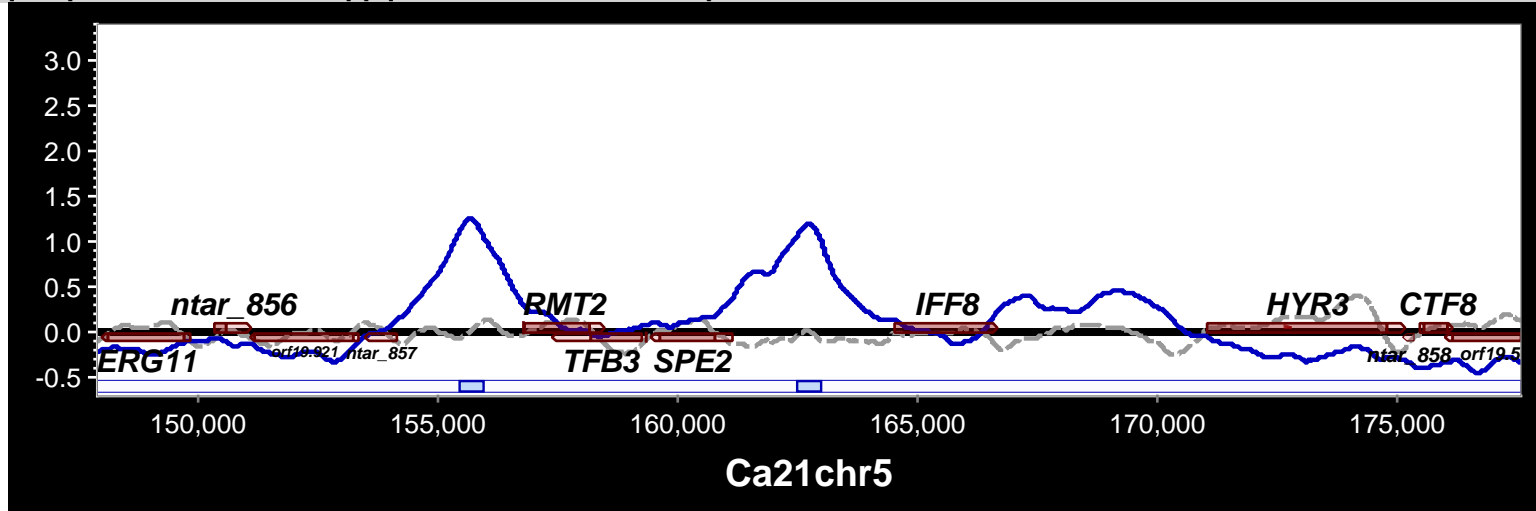

[1.188] Ca21chr2:1638049-1667732 [+] [PHM7, orf19.2169, orf19.2168.3, orf19.2168, ARA1]

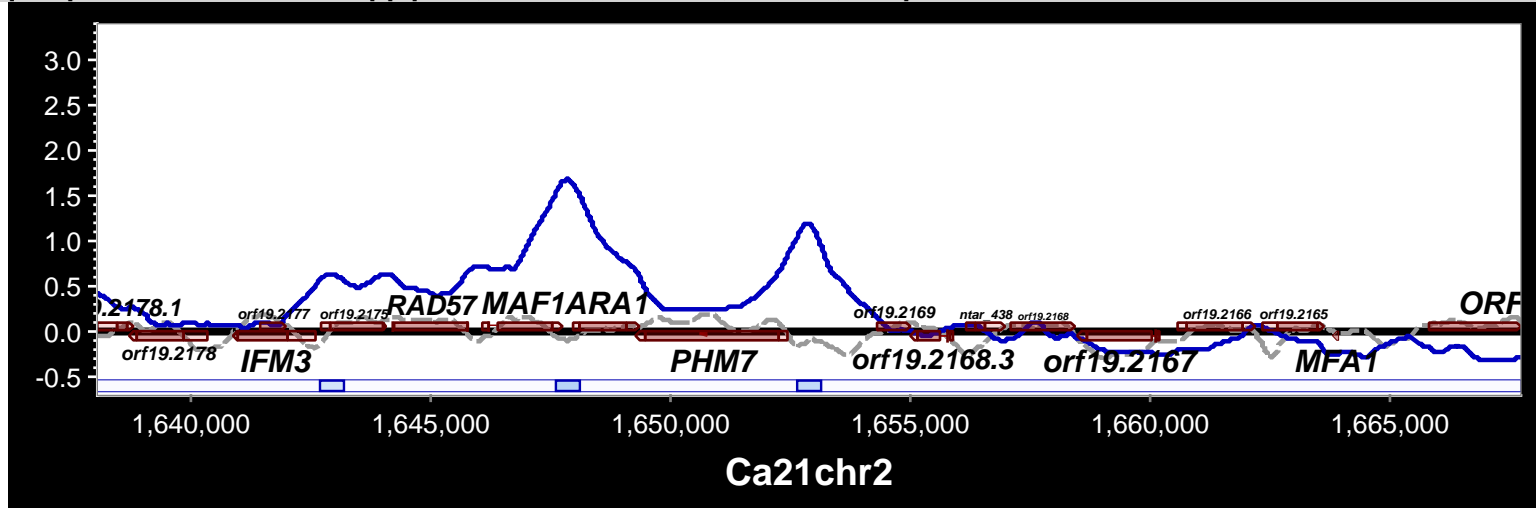

[1.186] Ca21chr1:3096403-3126086 [+] [RBE1, FTR1, RPL4B, orf19.7216, orf19.7215.3]

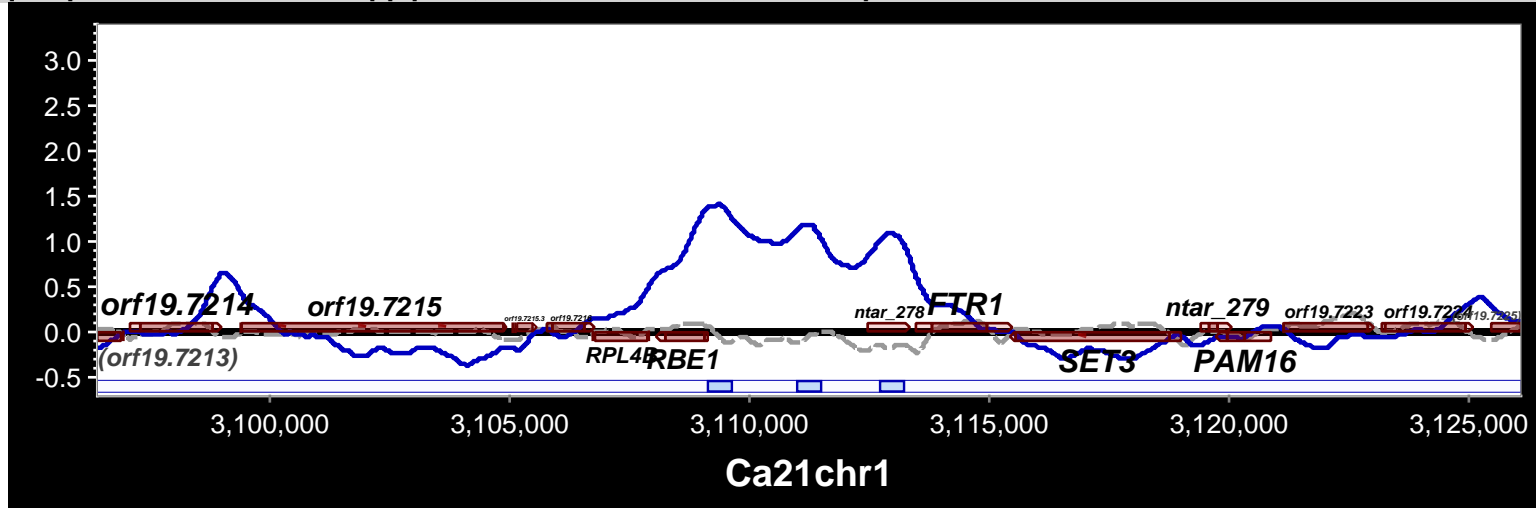

[1.181] Ca21chr2:300937-330620 [+] [orf19.1486, orf19.1485, orf19.1484, orf19.1483, orf19.1482]

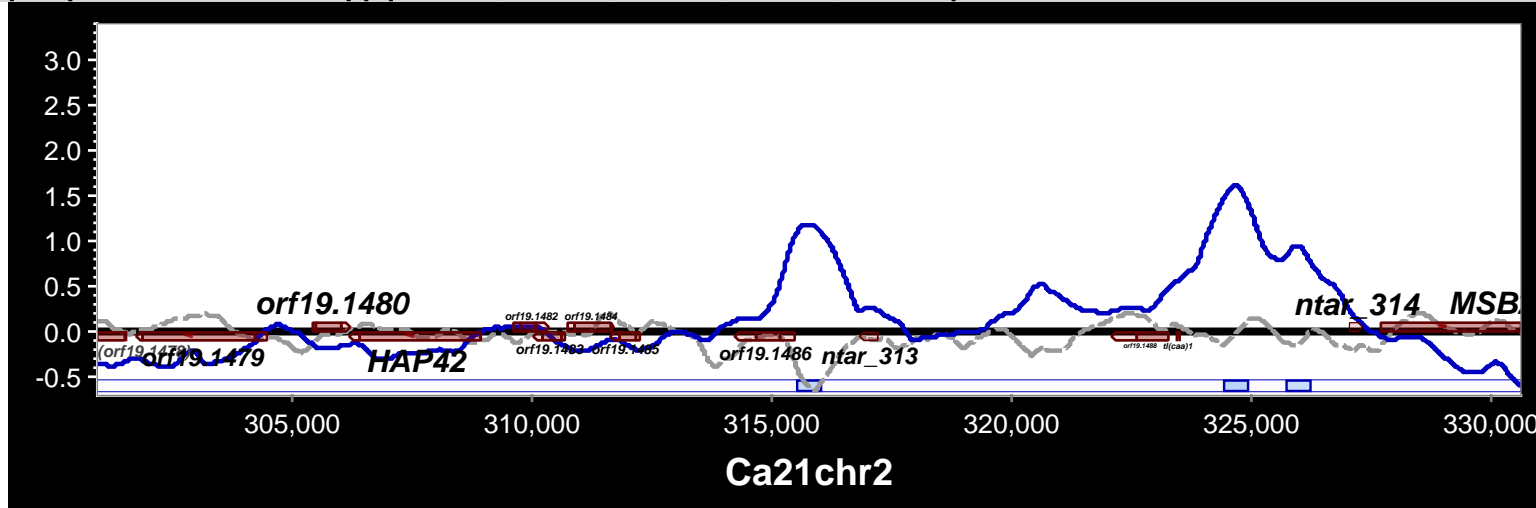



[1.174] Ca21chr3:260787-290470 [+] [orf19.1722, NCE103, orf19.1723, orf19.1724, orf19.1720]

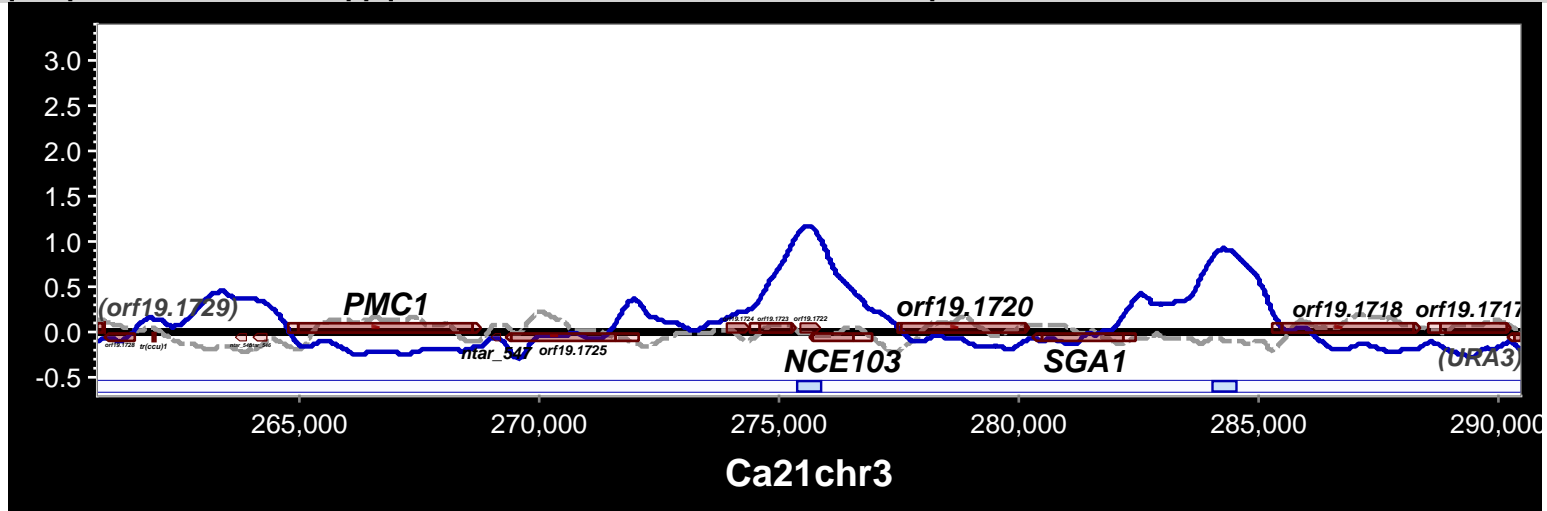

[1.172] Ca21chr4:842296-871979 [+] [orf19.5311, orf19.5312, orf19.5308, orf19.1208, JEN2]

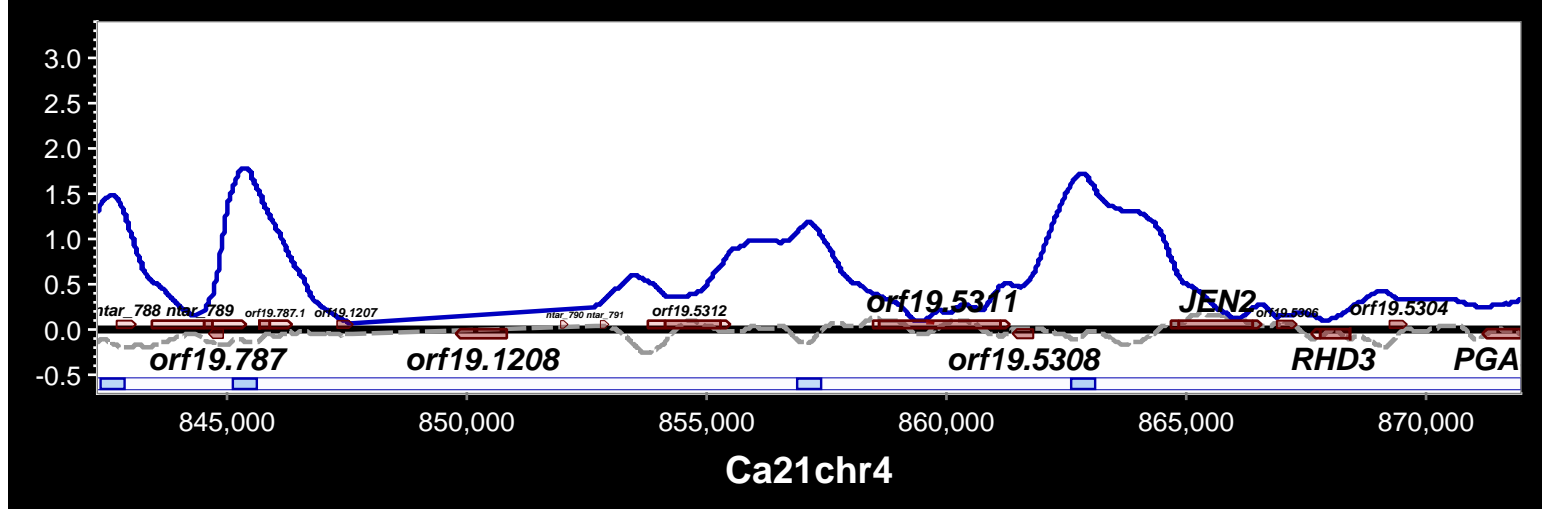

[1.168] Ca21chr2:1118884-1148567 [+] [orf19.6871, orf19.6869, orf19.6868, orf19.6867, orf19.6866]

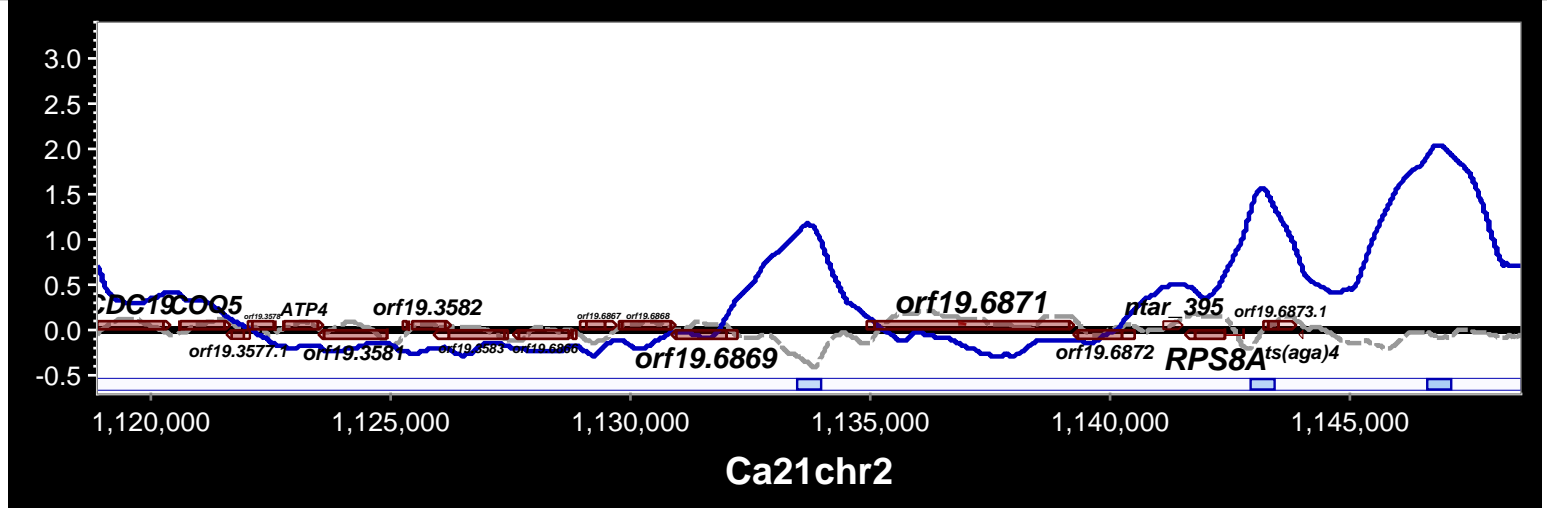

[1.16] Ca21chr3:730356-760039 [+] [SKN2, RSN1, orf19.346, orf19.349, PRE9]

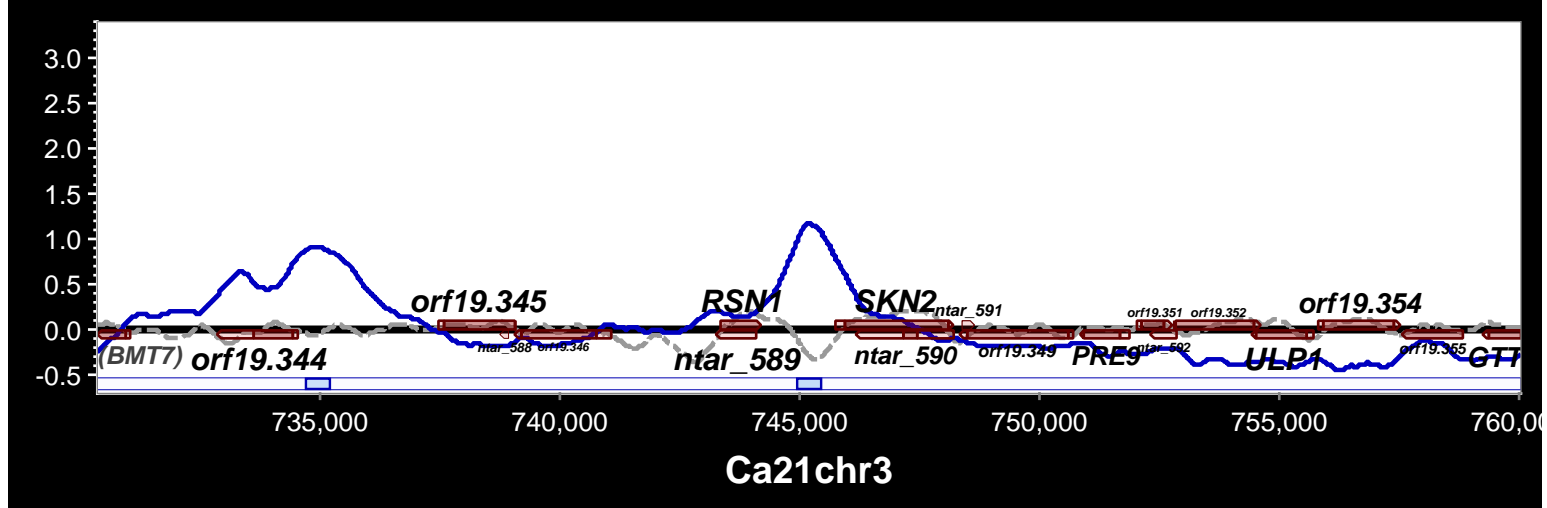

[1.16] Ca21chr4:796333-826016 [+] [orf19.5037, orf19.5038, orf19.1297, orf19.1298, orf19.5039]

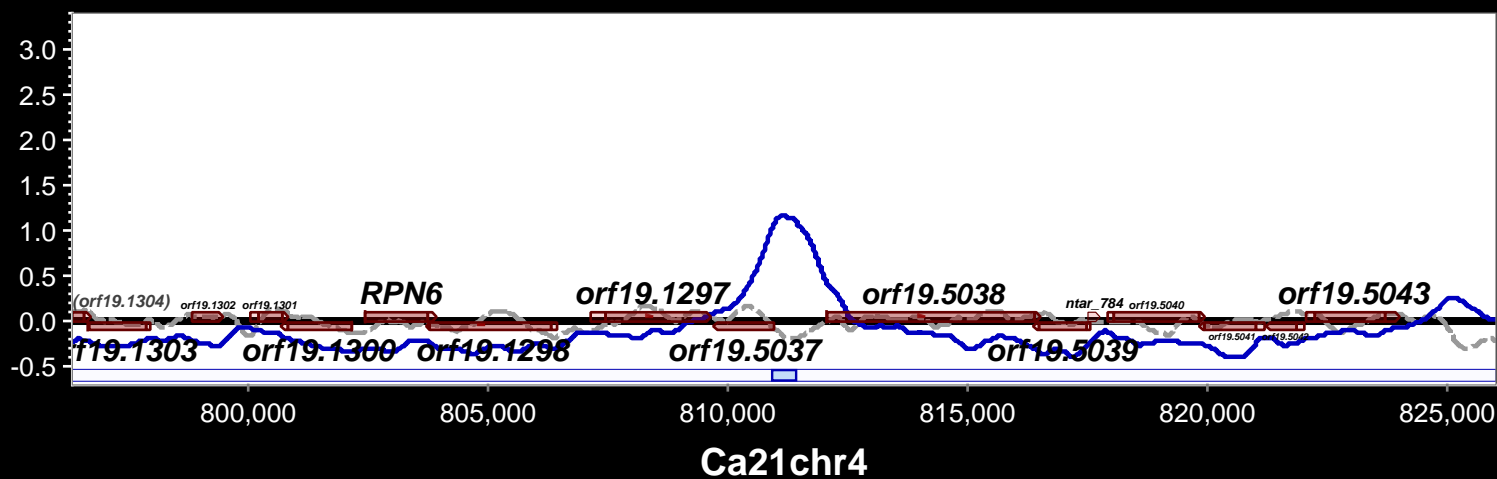

[1.159] Ca21chr2:725002-754685 [+] [ADAEC, orf19.867, RAD32, orf19.871, orf19.872]

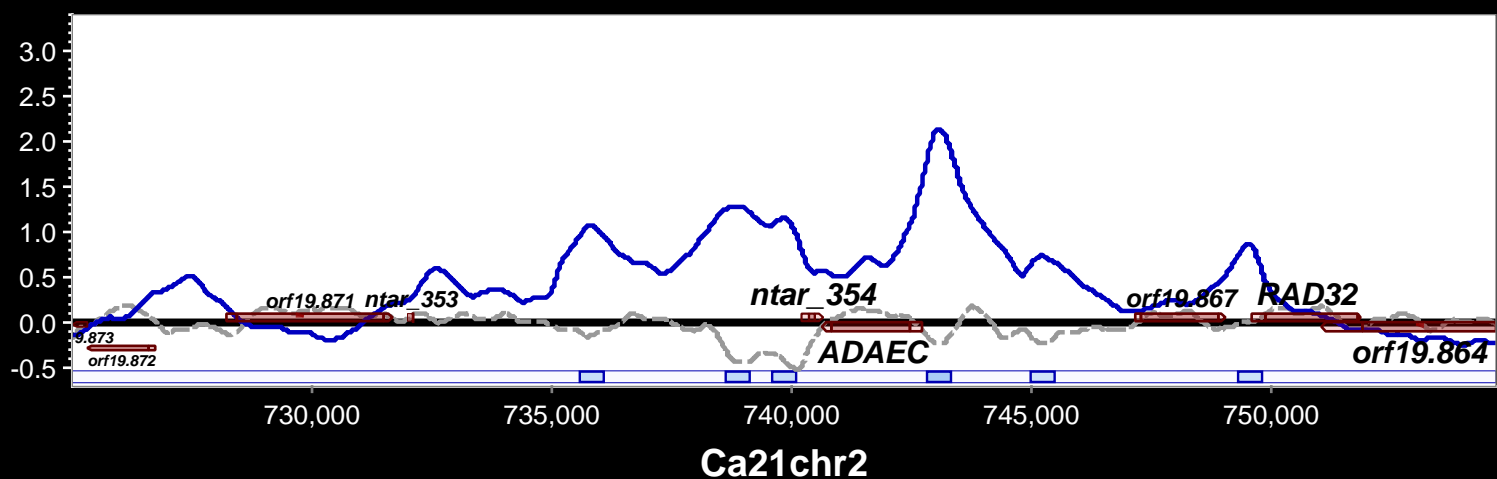

[1.158] Ca21chr1:1288482-1318165 [+] [MDM34, orf19.1825, orf19.1827, BUD16, PGA50]

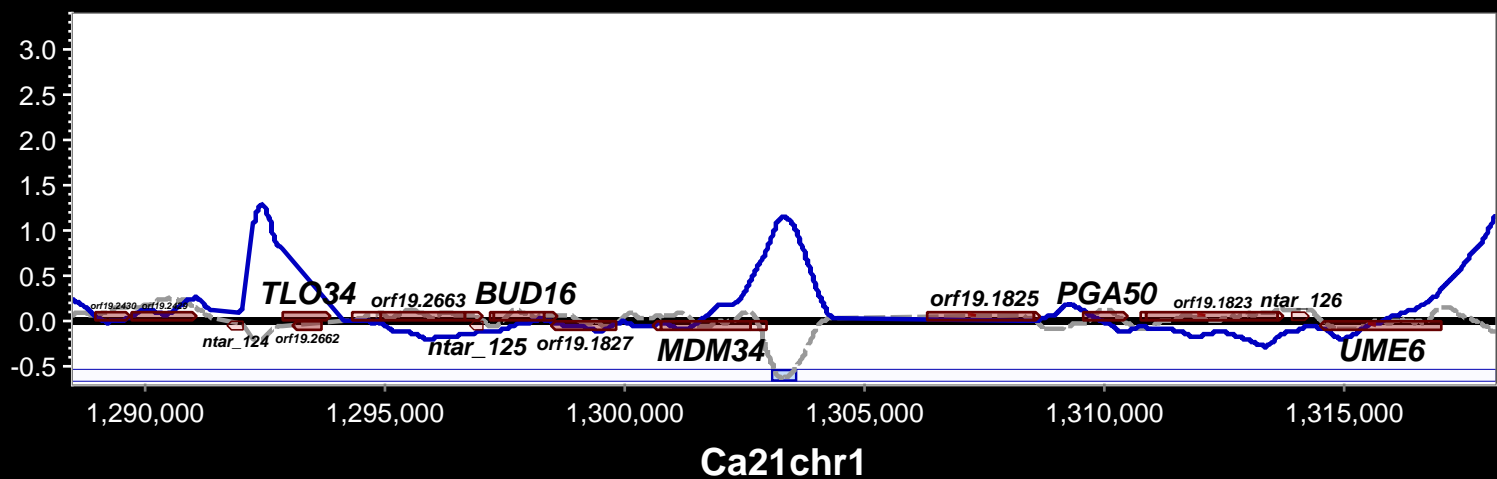

[1.158] Ca21chr1:3010855-3040538 [+] [MYO2, orf19.5014, AGM1, orf19.5012, orf19.5016]

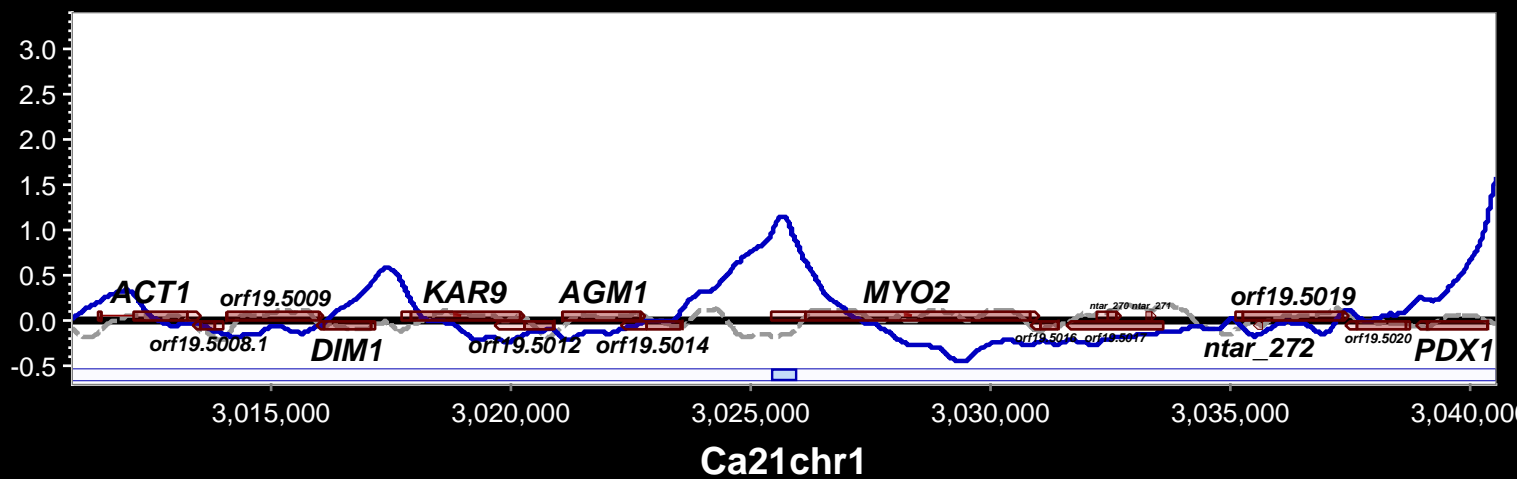

[1.155] Ca21chr4:184068-213751 [+] [PGA57, DAG7, orf19.4690, orf19.4691, orf19.4686]

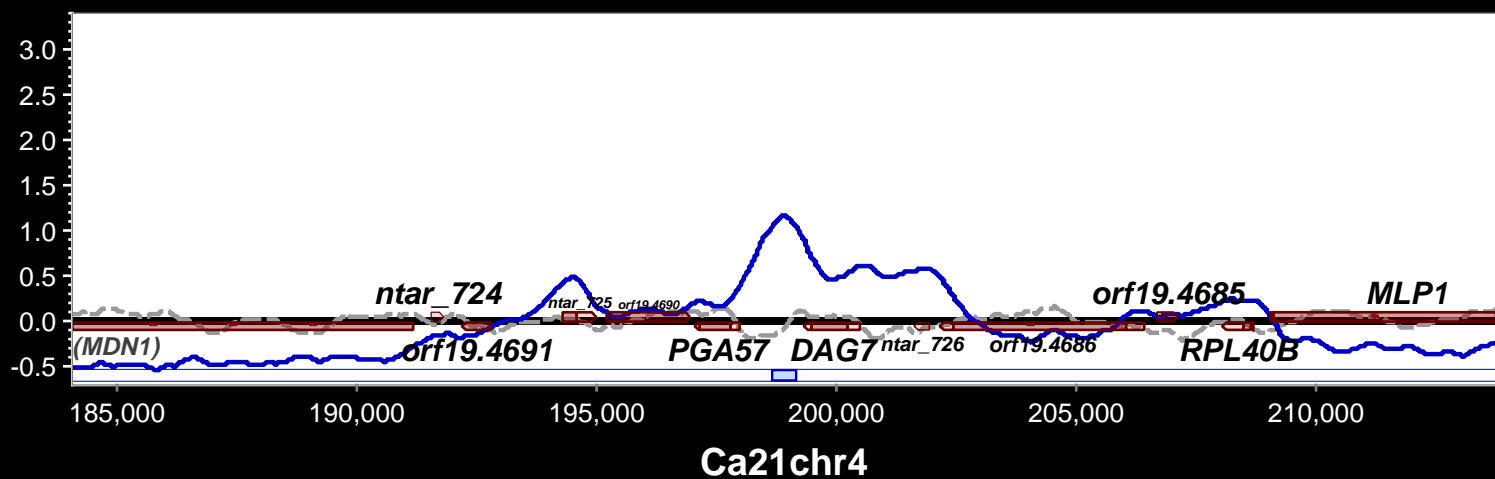

[1.153] Ca21chr4:979986-1009669 [+] [CEN4, orf19.3820, orf19.3821, orf19.3819, GOA1]

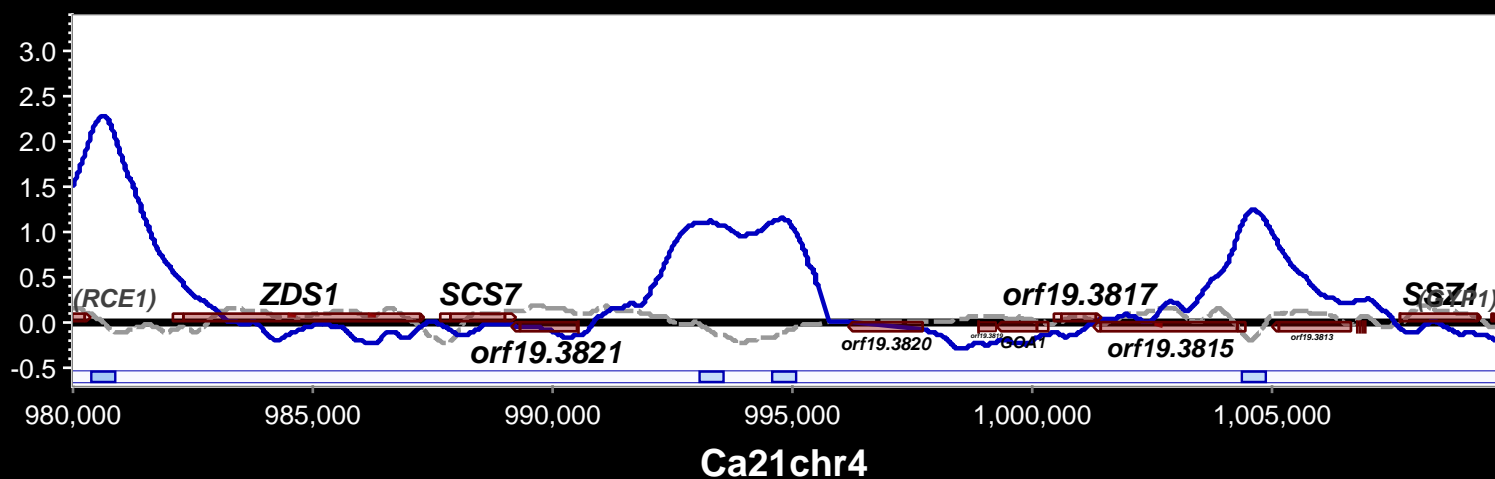

[1.151] Ca21chr3:559354-589037 [+] [orf19.257, orf19.255, orf19.258, orf19.259, orf19.254]

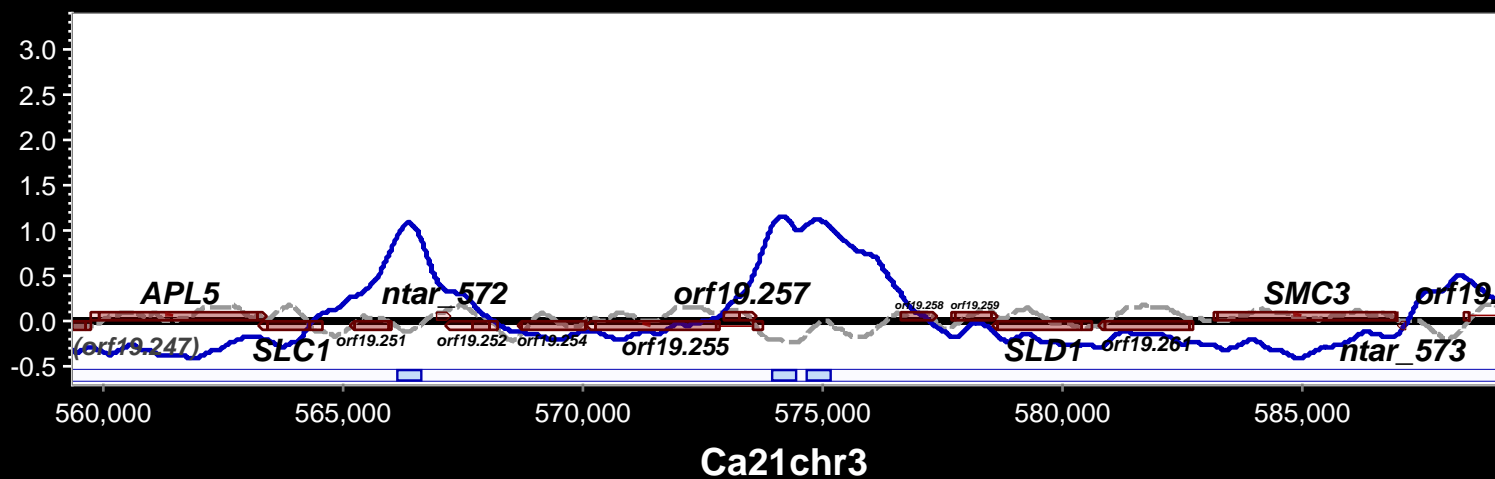

[1.15] Ca21chr3:1043265-1072948 [+] [orf19.5960, orf19.5961, SNF3, NOP14, orf19.5963]

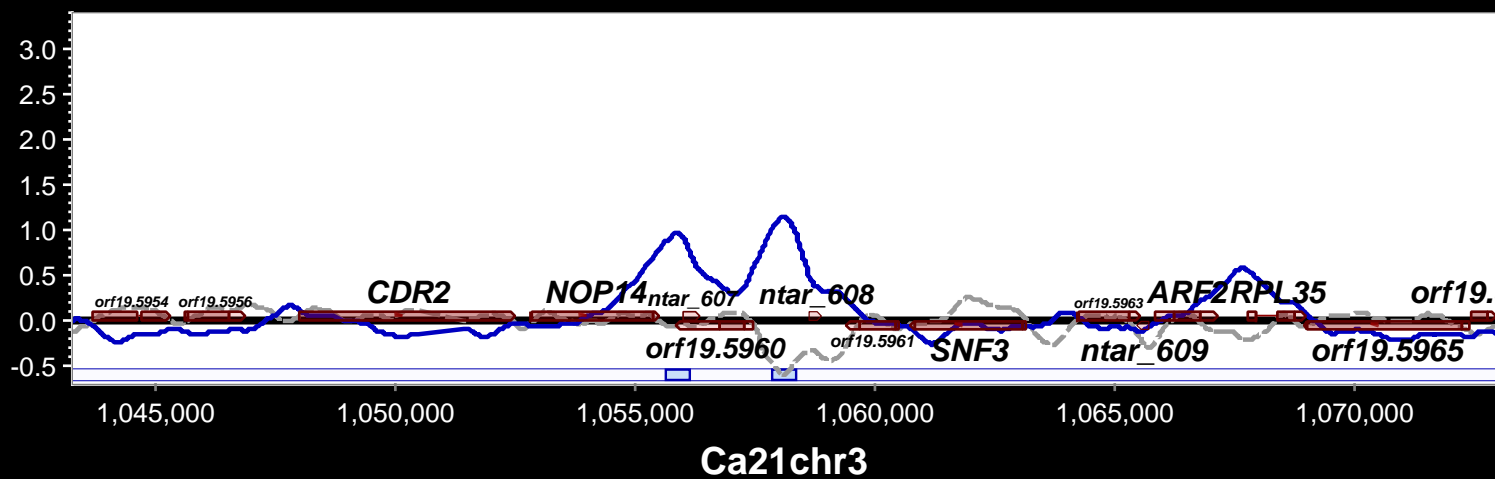

[1.149] Ca21chr6:694440-724123 [+] [orf19.5626, orf19.5627, orf19.5625, ARP4, orf19.5628]

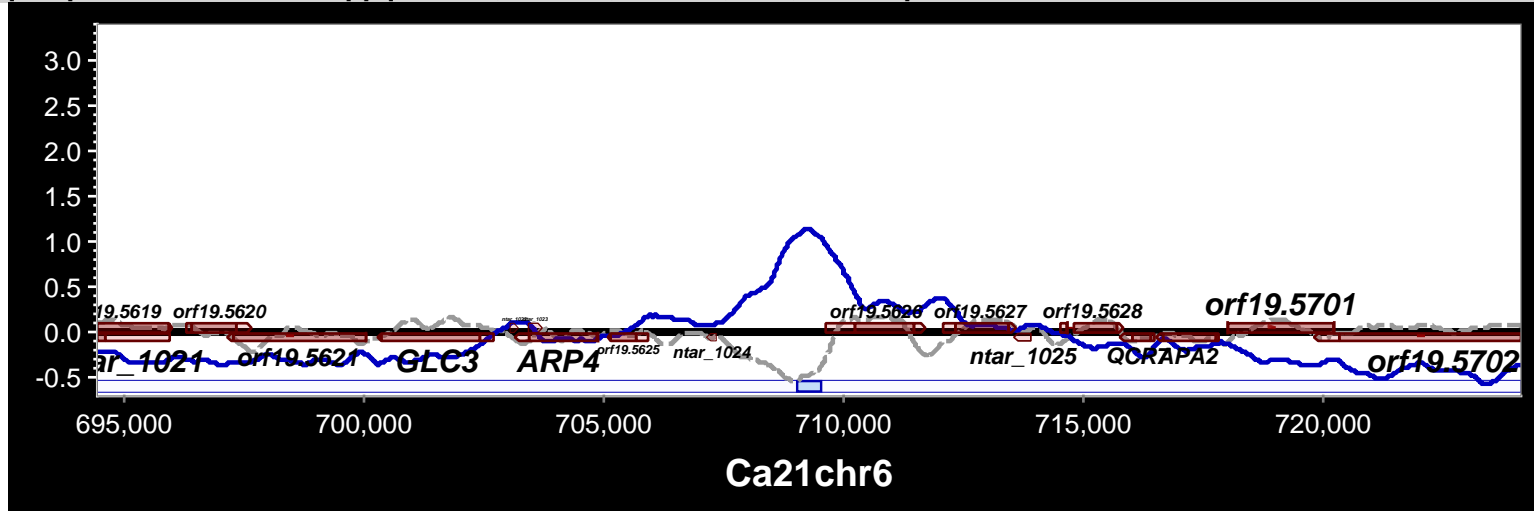

[1.147] Ca21chr2:1912152-1941835 [+] [CEN2, RPL3, orf19.1604, orf19.1600, orf19.1599]

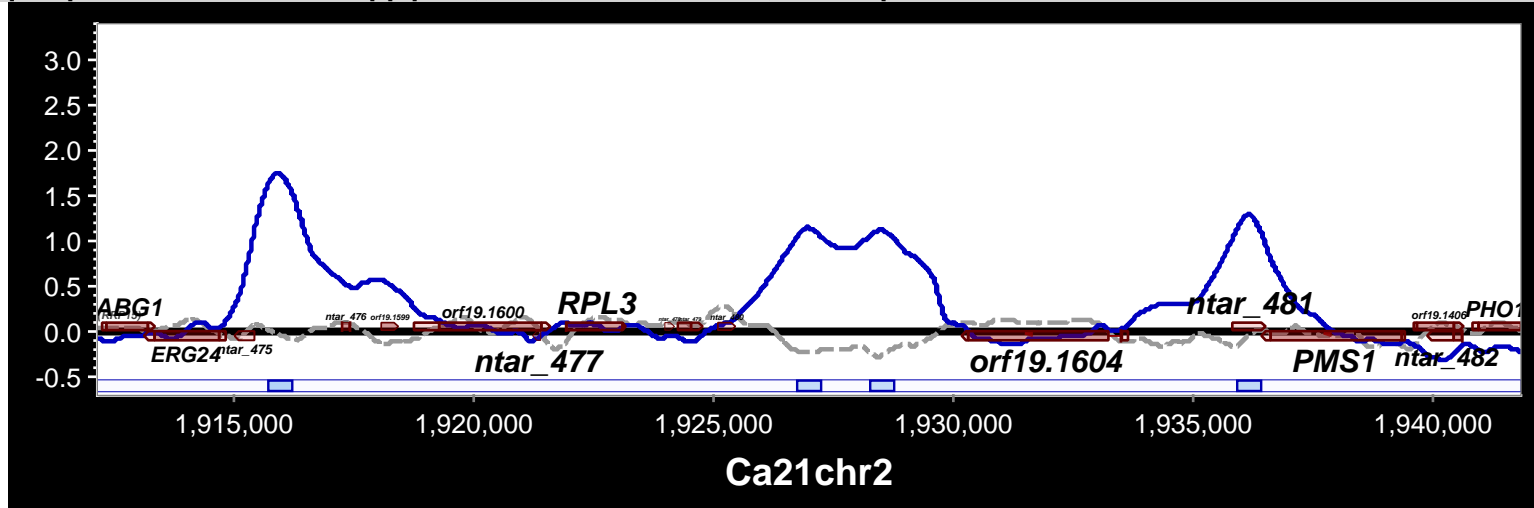

[1.145] Ca21chr1:2172303-2201986 [+] [CPP1, SWE1, orf19.4865, orf19.4864, SFU1]

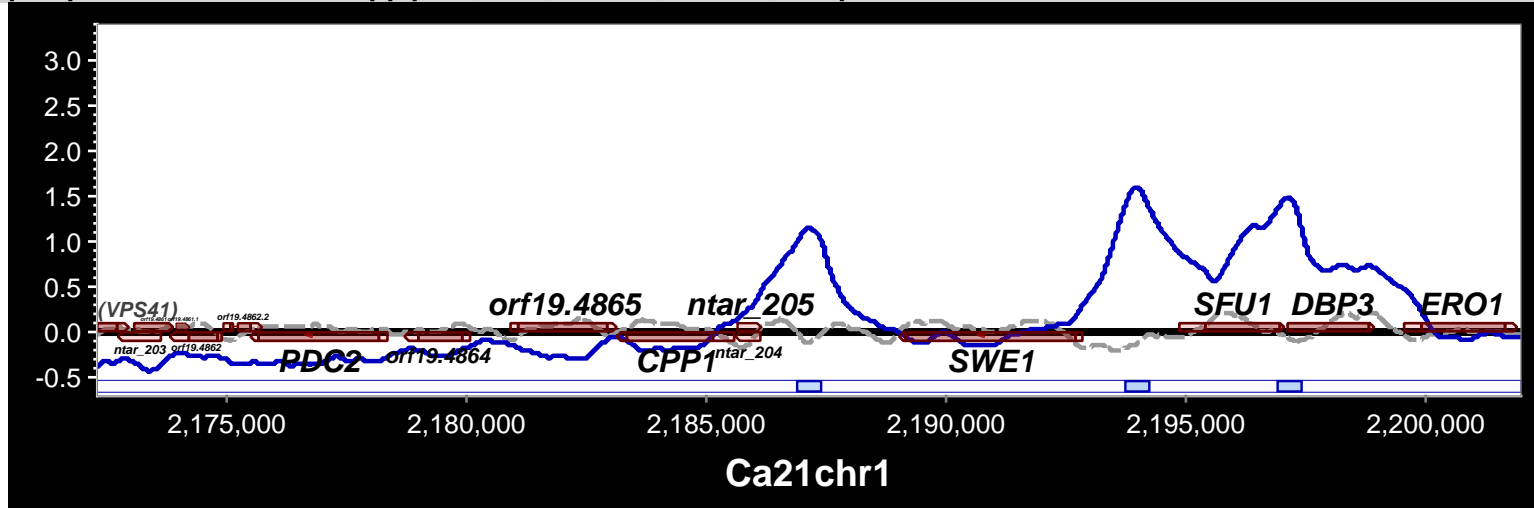

[1.139] Ca21chr3:1604493-1634176 [+] [orf19.6793, RRD1, FESUR1, HHT1, orf19.6795]

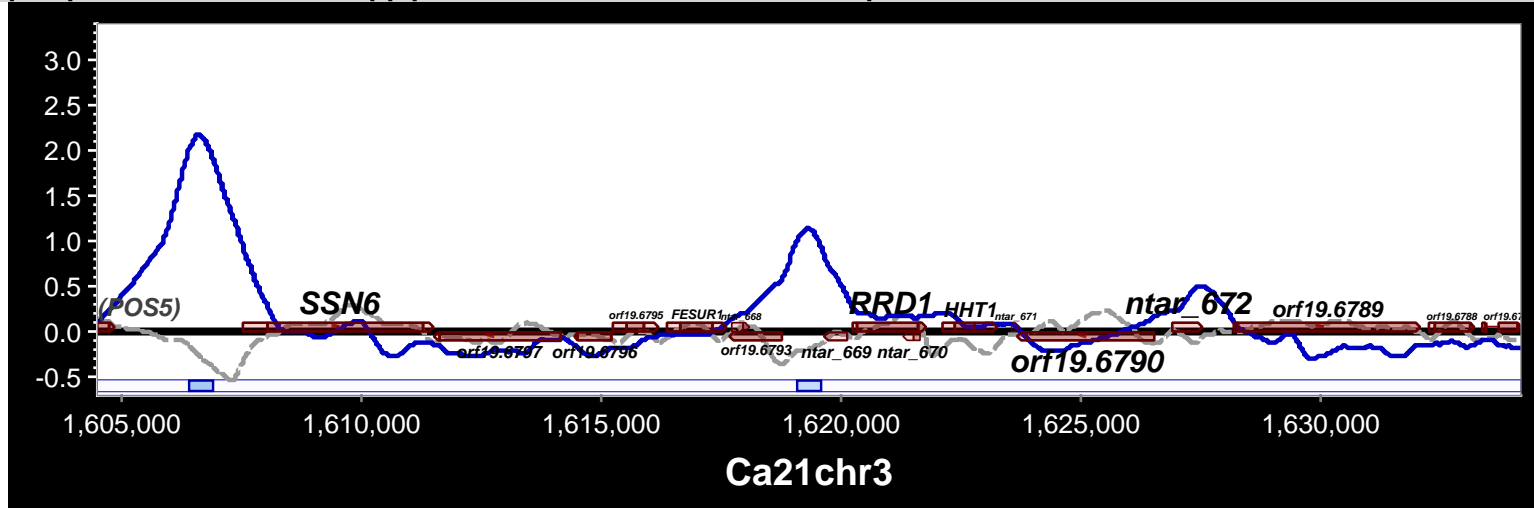

[1.135] Ca21chr7:179365-209048 [+] [GPH1, orf19.7022, orf19.7023, orf19.7020, orf19.7024]

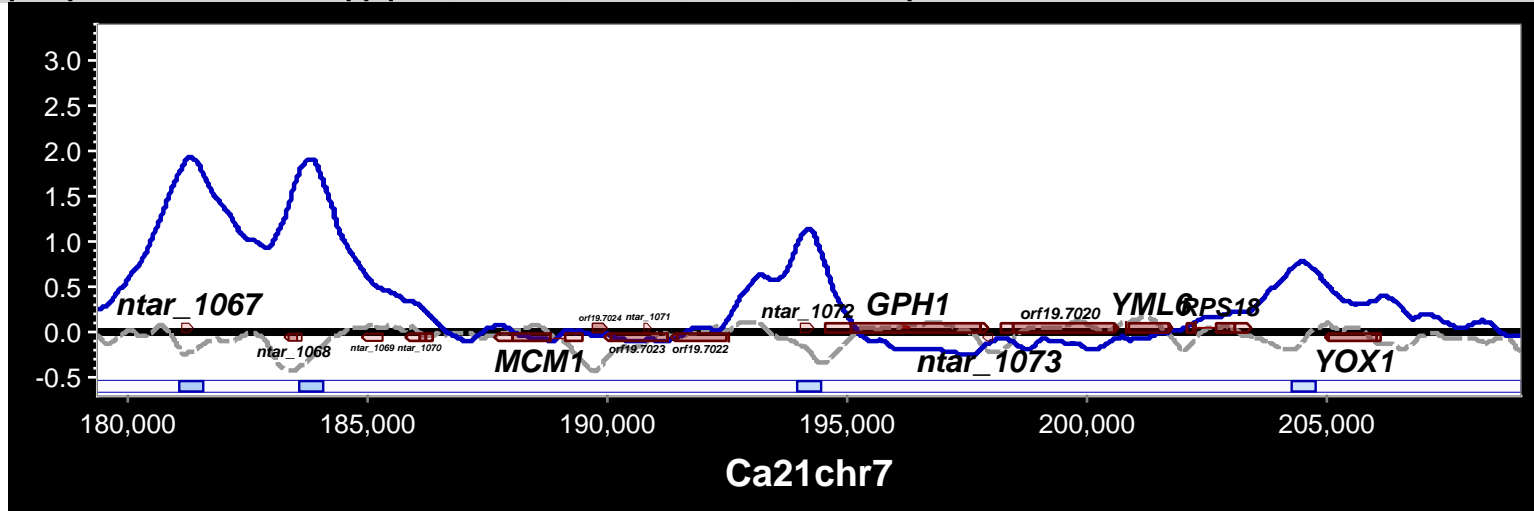

[1.134] Ca21chr1:1077141-1106824 [+] [orf19.449, orf19.448, orf19.446.2, orf19.446.1, orf19.450]

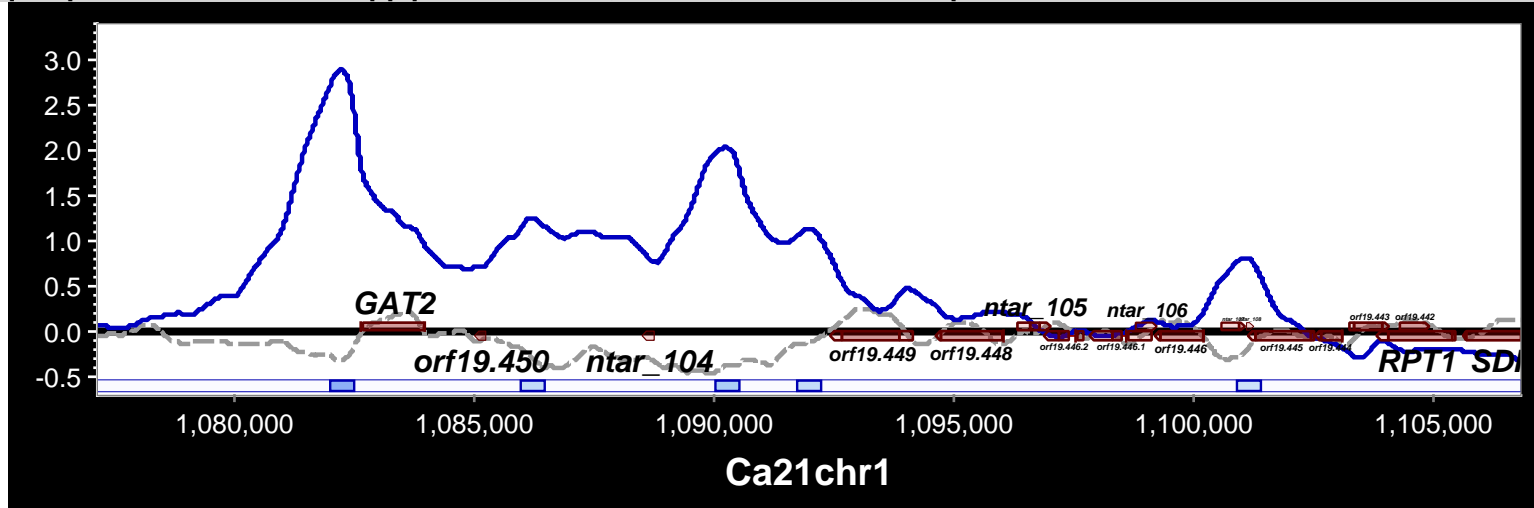

[1.132] Ca21chr3:194079-223762 [+] [orf19.2506, orf19.2505, ARP9, BMS1, orf19.2503]

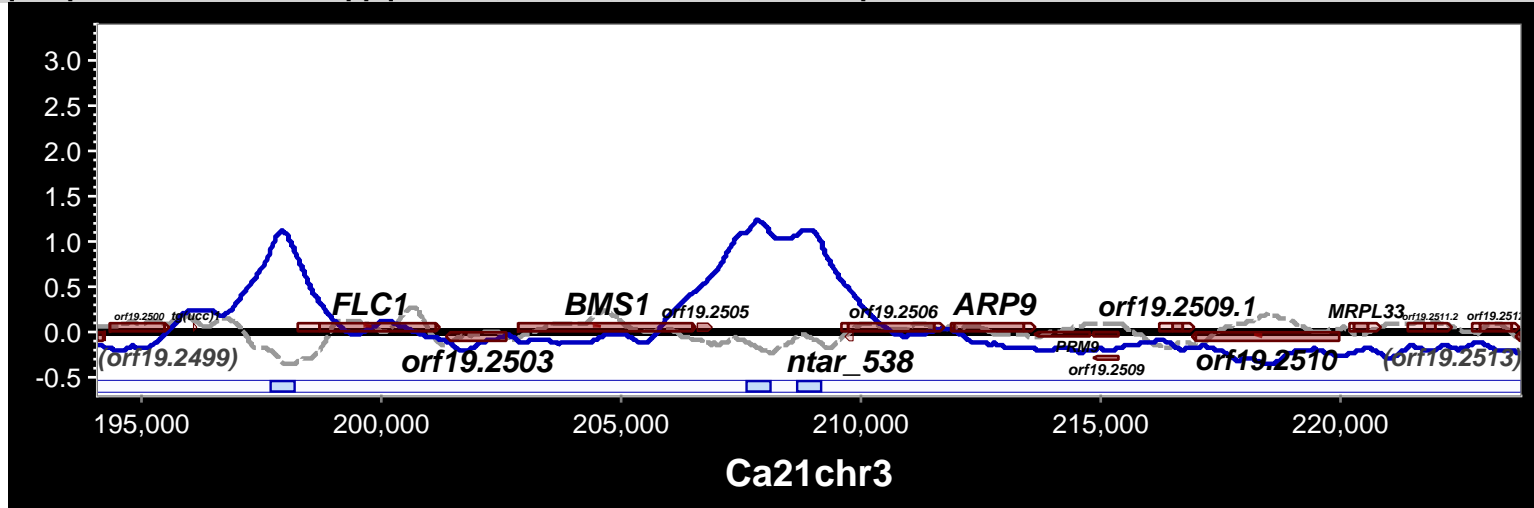

[1.131] Ca21chr3:1666776-1696459 [+] [SLK19, MDS3, orf19.6759, orf19.6766, orf19.6758]

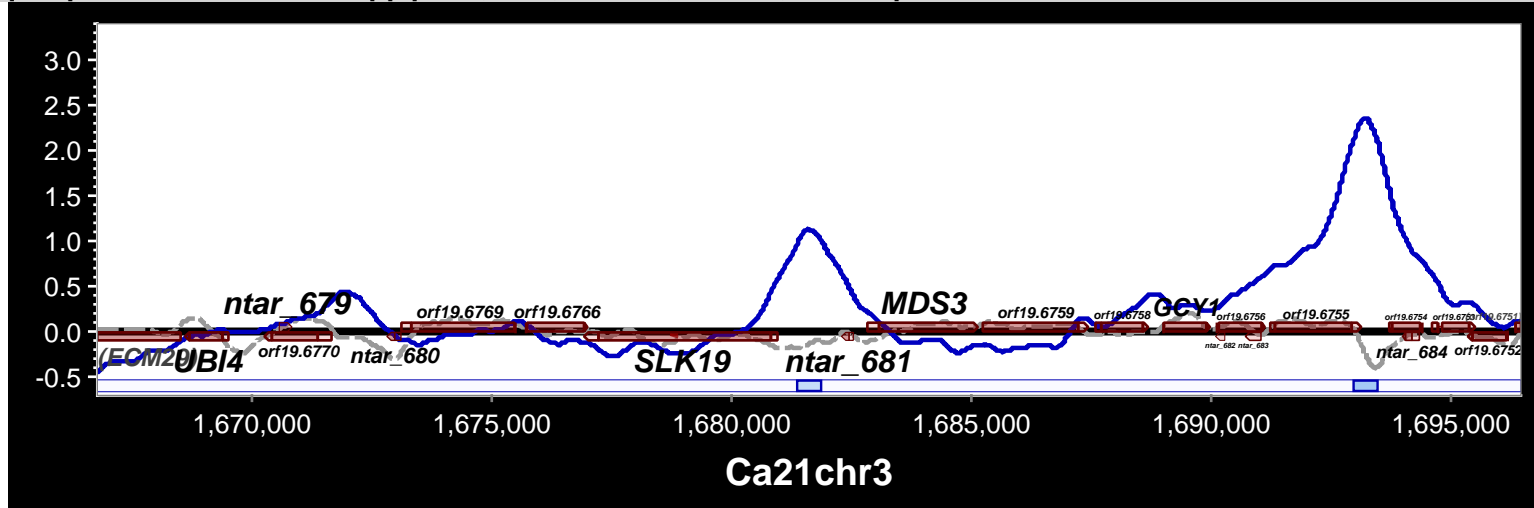

[1.131] Ca21chr4:388757-418440 [+] [RFX2, CAT2, orf19.4589, HGH1, HSX11]

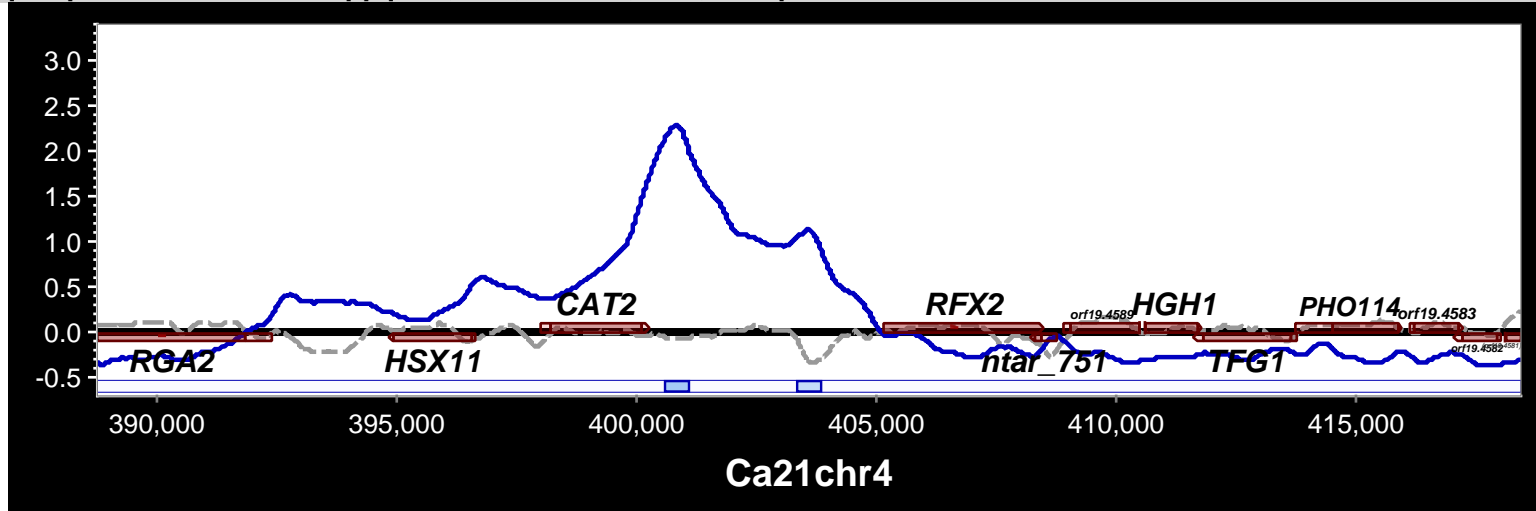

[1.13] Ca21chr2:377580-407263 [+] [ARO3, orf19.1519, orf19.1516, CHT4, orf19.1514]

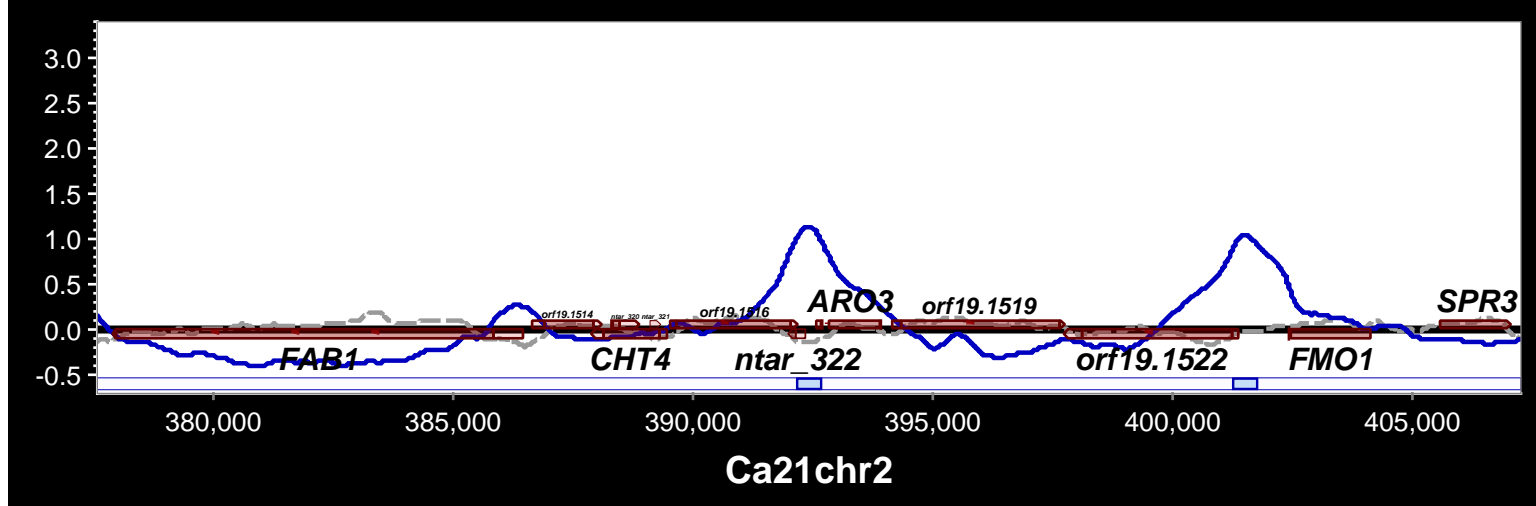

[1.13] Ca21chr2:2171076-2200759 [+] [GAL4, UBC15, orf19.5339, orf19.5340, RPS4A]

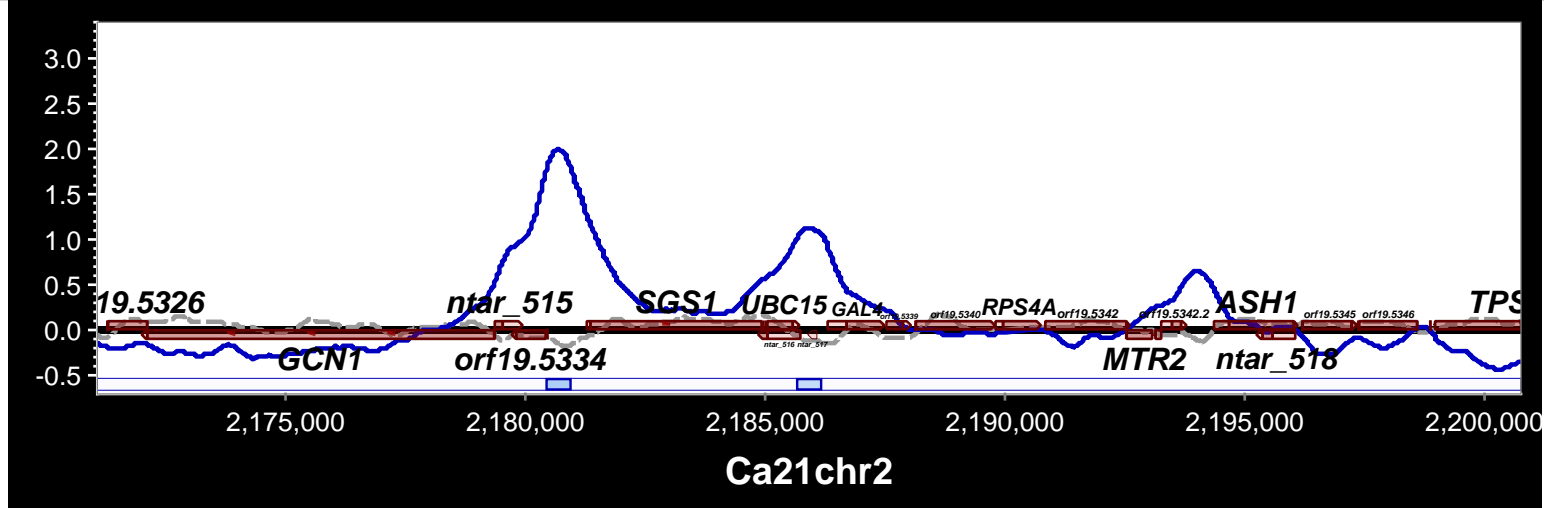

[1.127] Ca21chrR:1729762-1759445 [+] [orf19.599, CENR, TRK1, orf19.598, orf19.597]

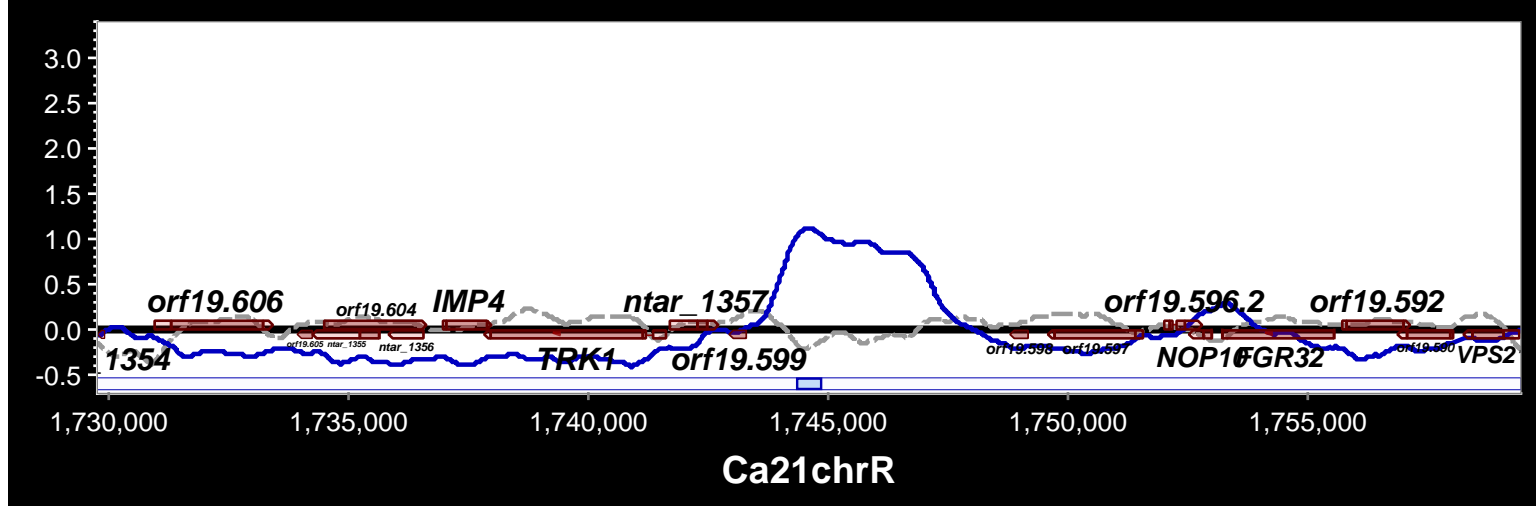

[1.125] Ca21chr1:1550734-1580417 [+] [CEN1, orf19.4439, orf19.4439.1, tL(AAG)2, SEC34]

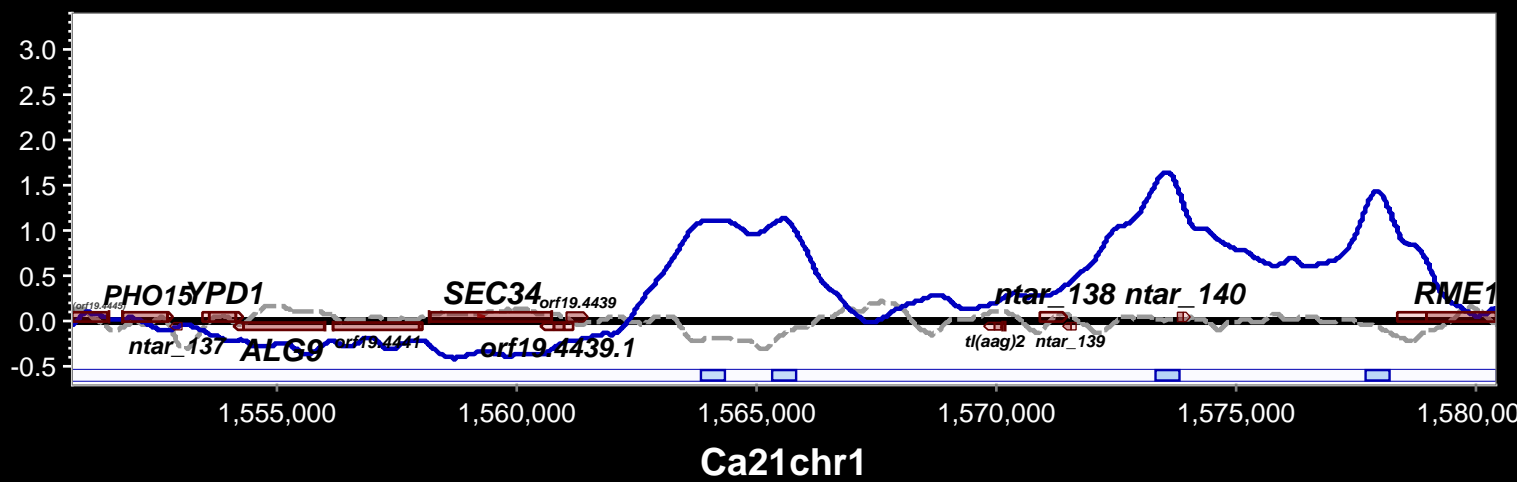

[1.125] Ca21chr1:2287846-2317529 [+] [FGR41, orf19.4911, RPL42, CBK1, orf19.4912]

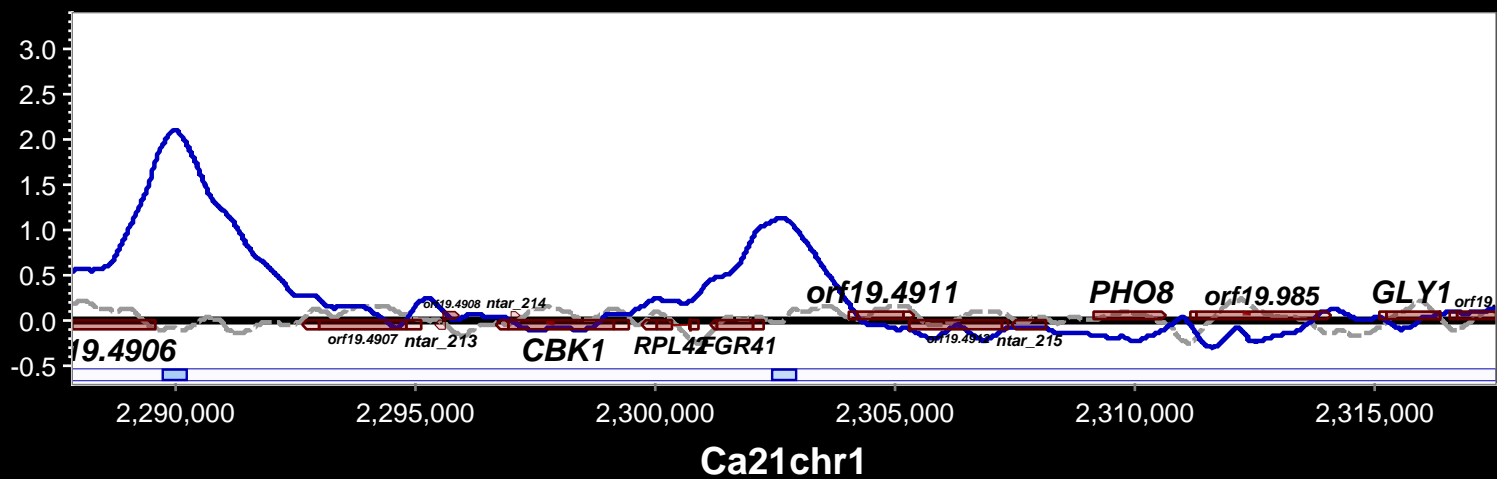

[1.125] Ca21chr7:16873-46556 [+] [orf19.7100, orf19.7101, orf19.7102, orf19.7098, orf19.7097]

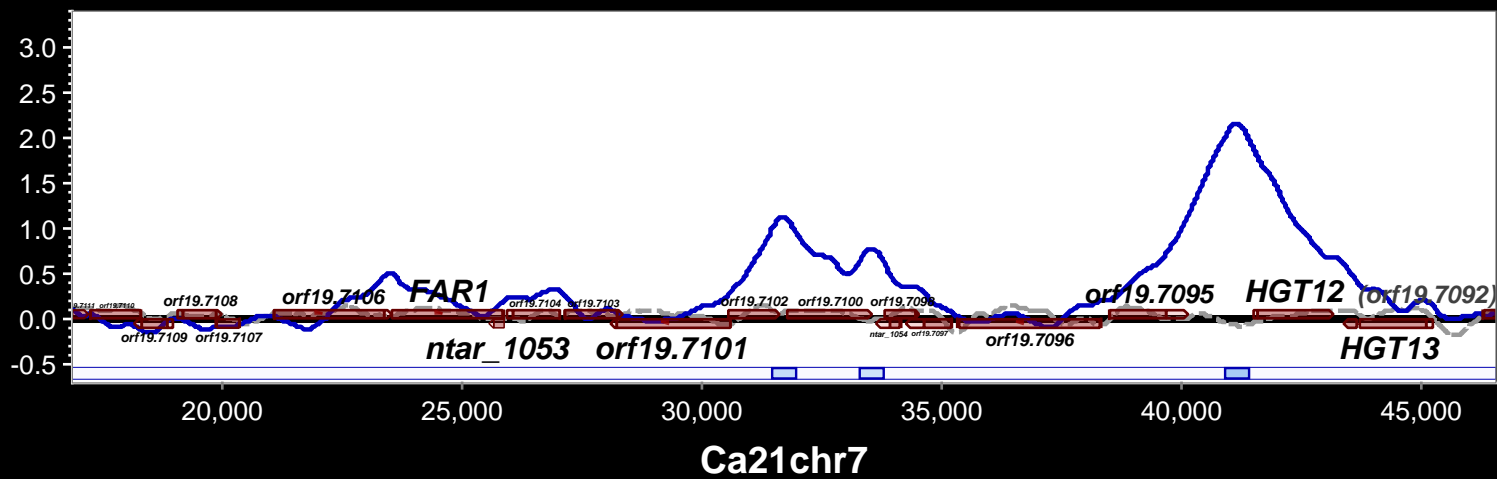

[1.124] Ca21chr3:942352-972035 [+] [orf19.5910, CMK1, TEC1, MAK21, orf19.5915]

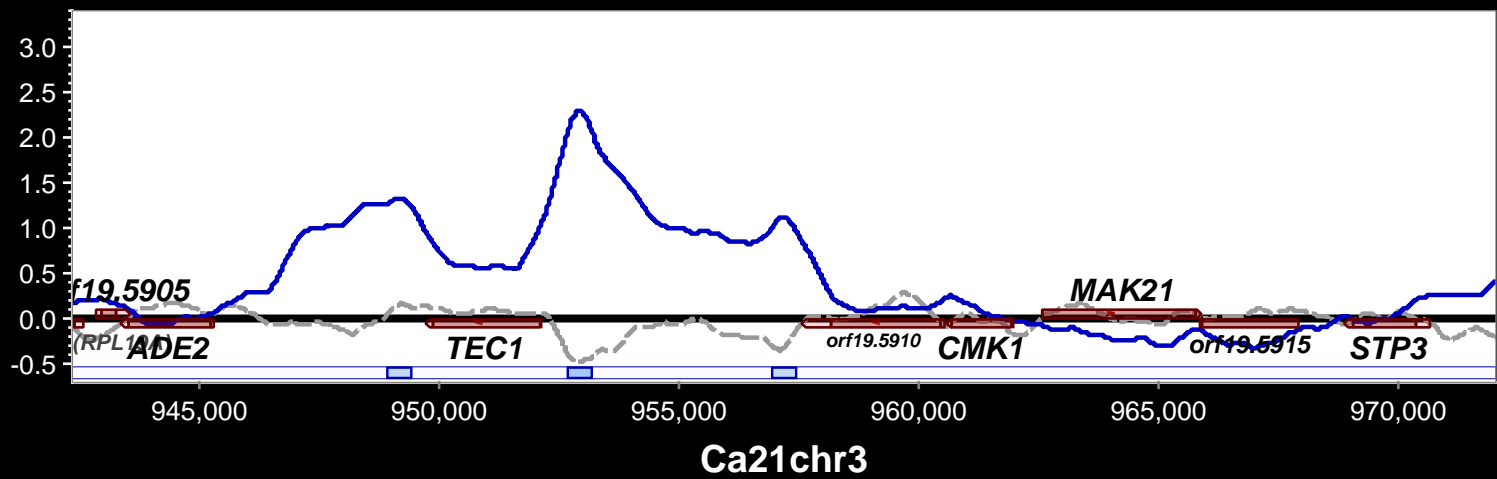

[1.122] Ca21chr2:1787583-1817266 [+] [PIR1, orf19.223, BUD20, orf19.225, orf19.217]

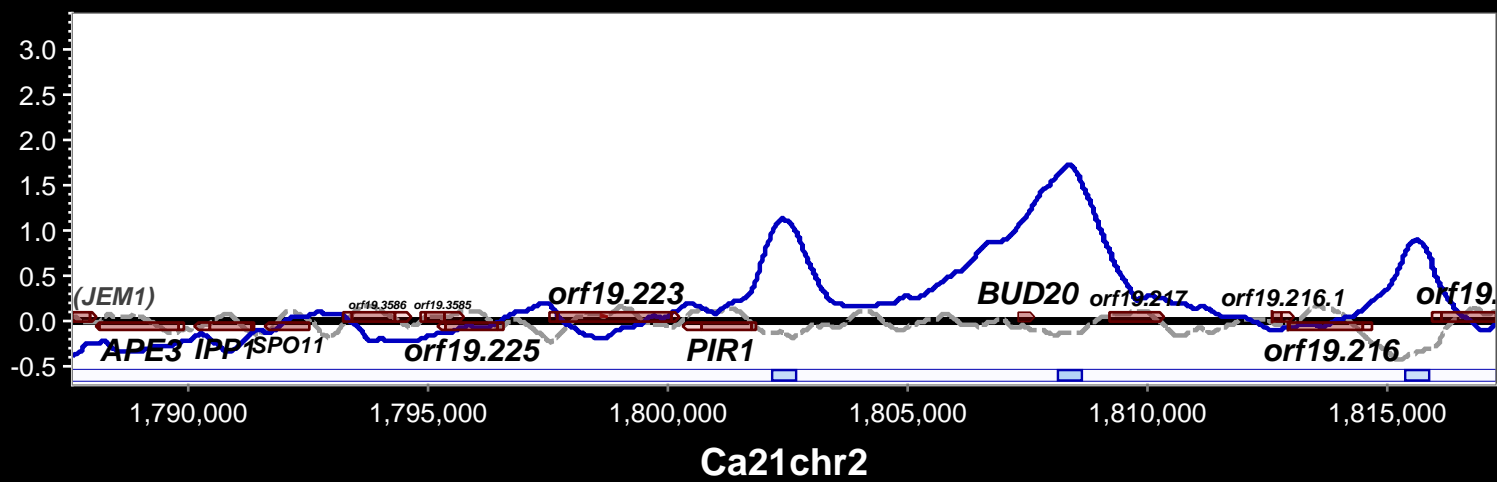

[1.122] Ca21chr2:1913675-1943358 [+] [CEN2, orf19.1604, RPL3, orf19.1600, orf19.1599]

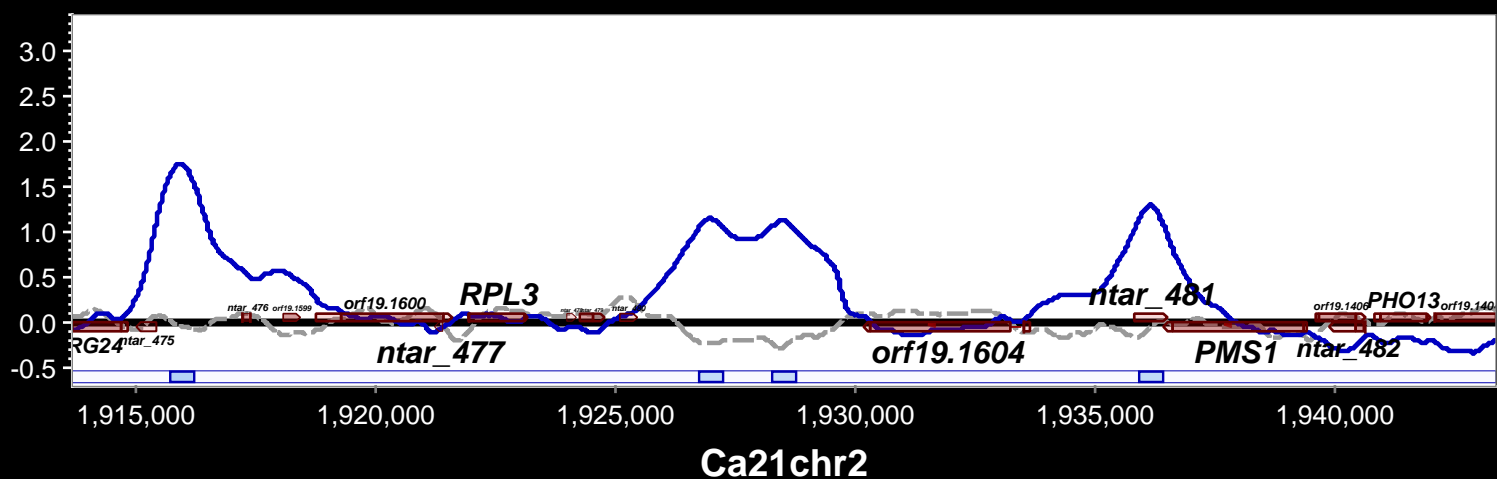

[1.121] Ca21chr3:810654-840337 [+] [orf19.6922, CEN3, orf19.2812, orf19.2813, AAP1]

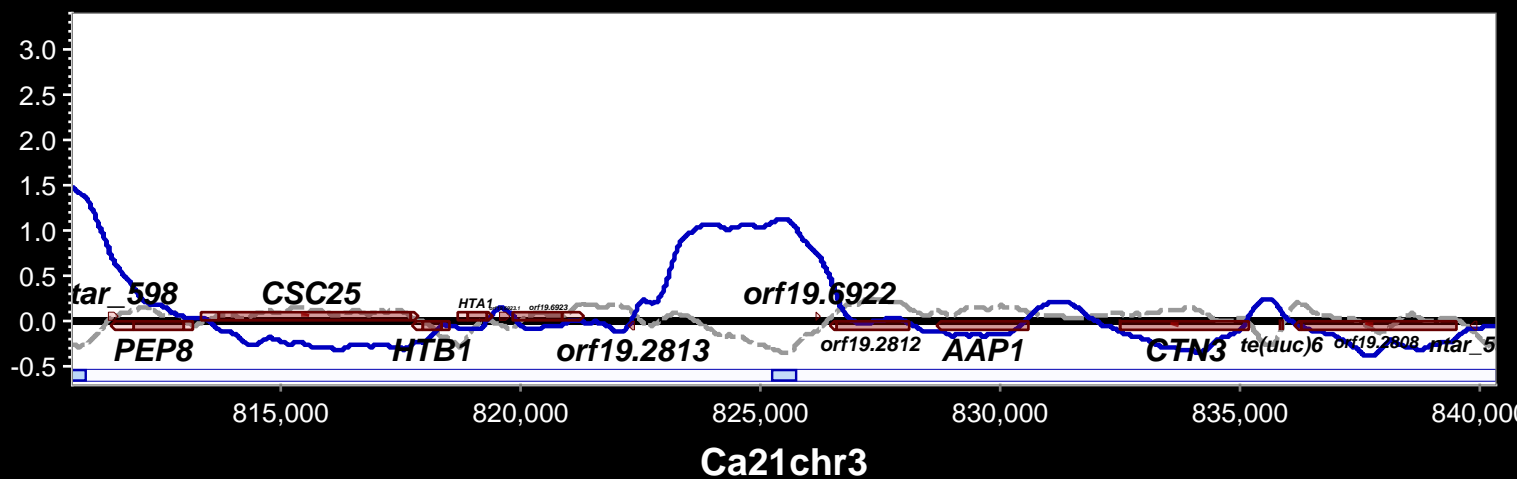

[1.12] Ca21chr2:502623-532306 [+] [orf19.1581, orf19.1580, orf19.1582, orf19.1584, ZRT2]

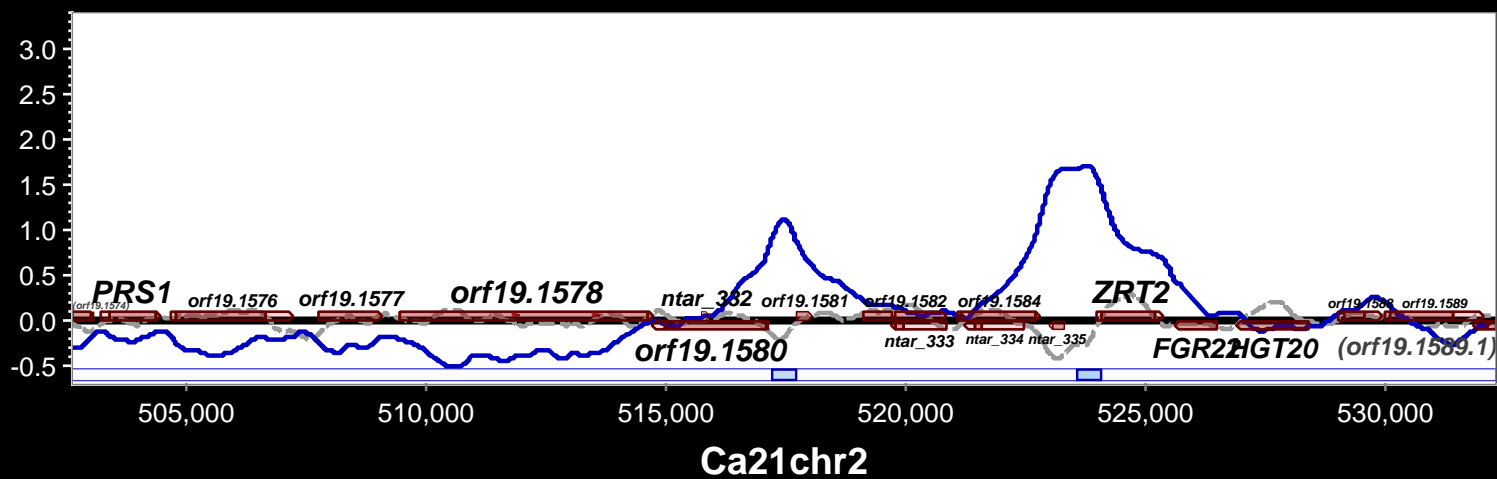



[1.119] Ca21chr3:183101-212784 [+] [FLC1, tG(UCC)1, orf19.2500, orf19.2499, orf19.2503]

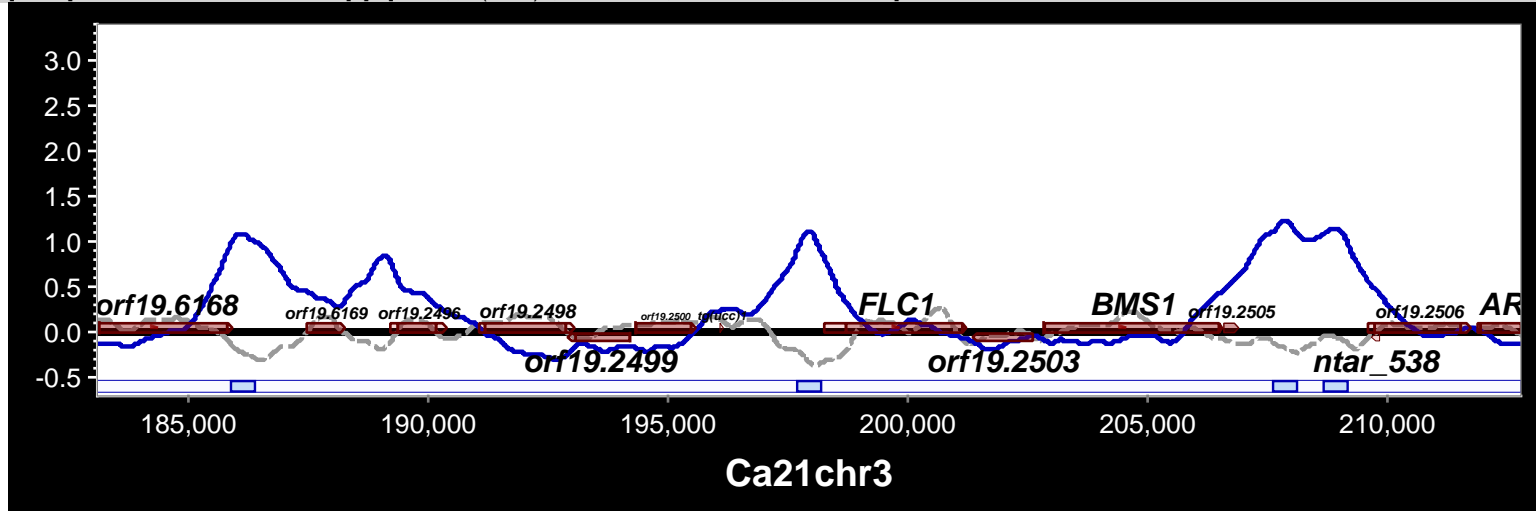

[1.119] Ca21chr4:978473-1008156 [+] [CEN4, orf19.3821, orf19.3820, SCS7, orf19.3819]

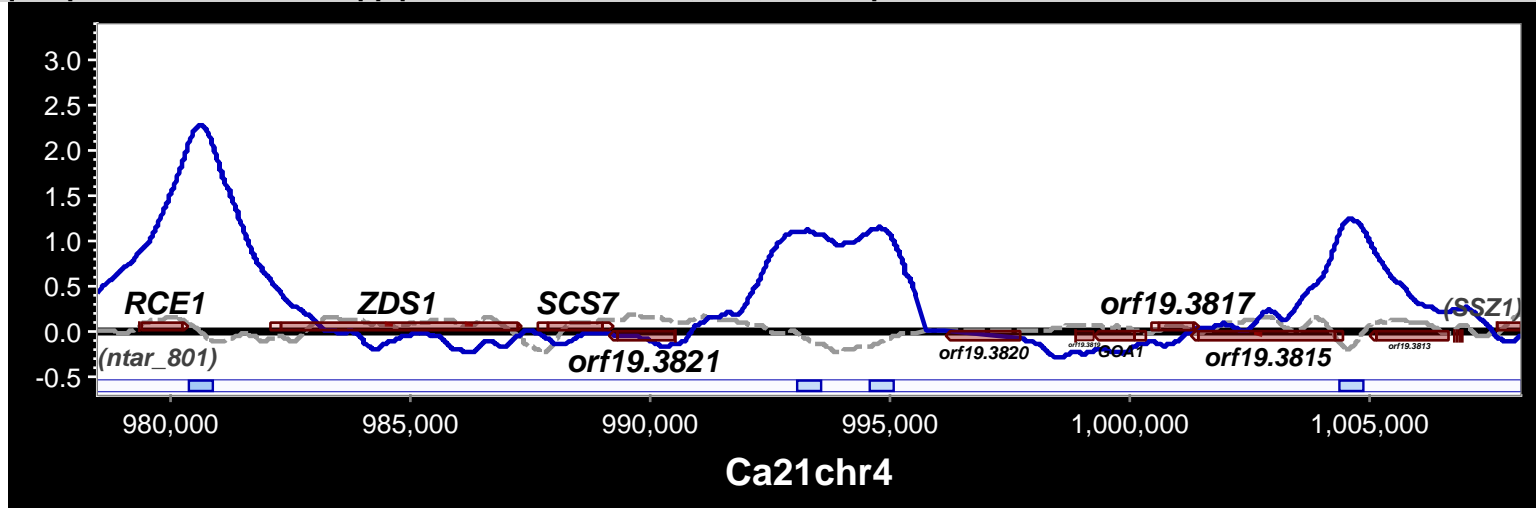

[1.118] Ca21chr1:1549249-1578932 [+] [CEN1, orf19.4439, orf19.4439.1, SEC34, tL(AAG)2]

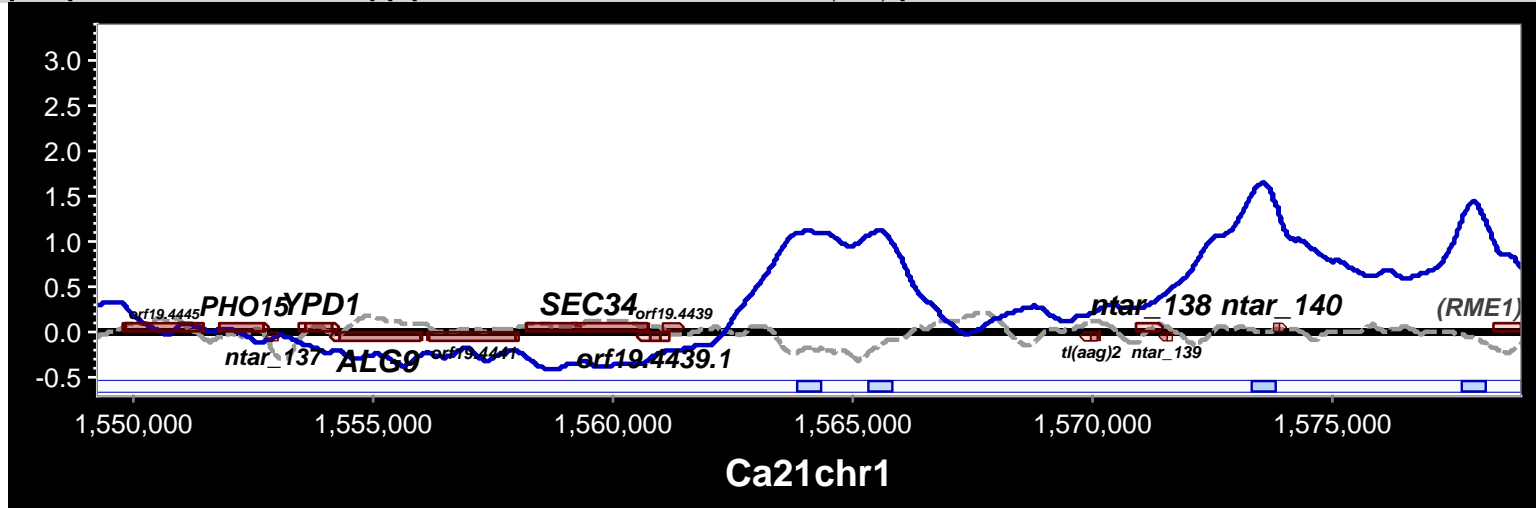

[1.117] Ca21chr6:296476-326159 [+] [orf19.3432, orf19.3431, OYE23, orf19.3430, orf19.3434]

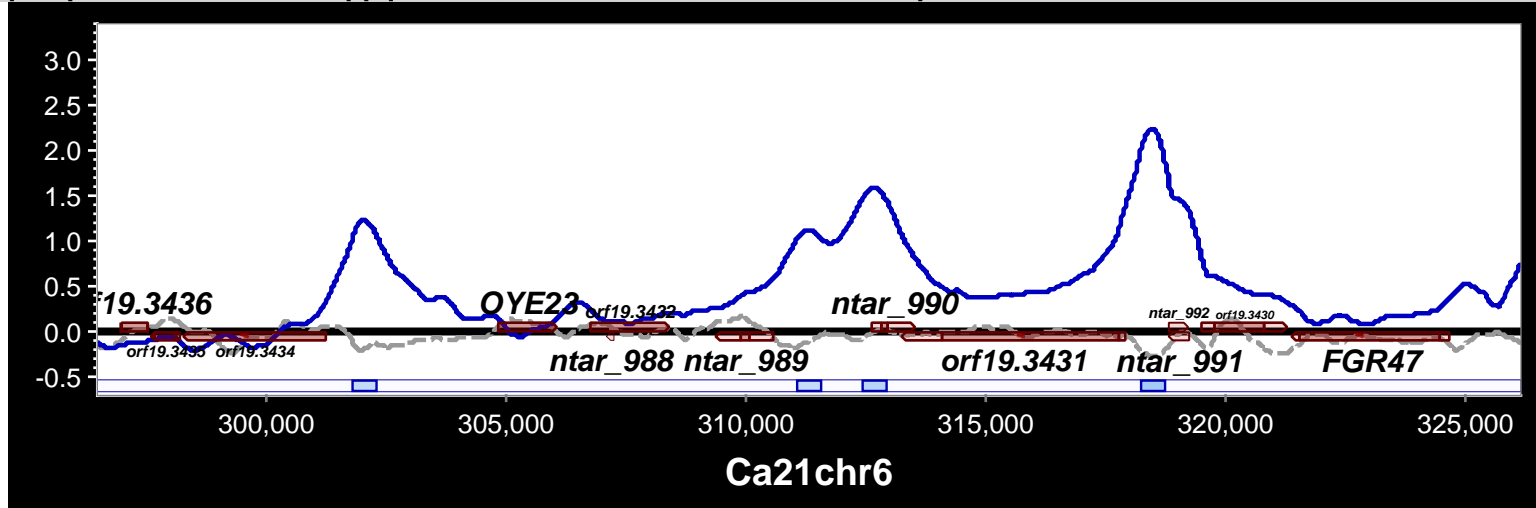



[1.11] Ca21chrR:785331-815014 [+] [VTC3, orf19.4380.1, orf19.4382, IFF3, orf19.4383]

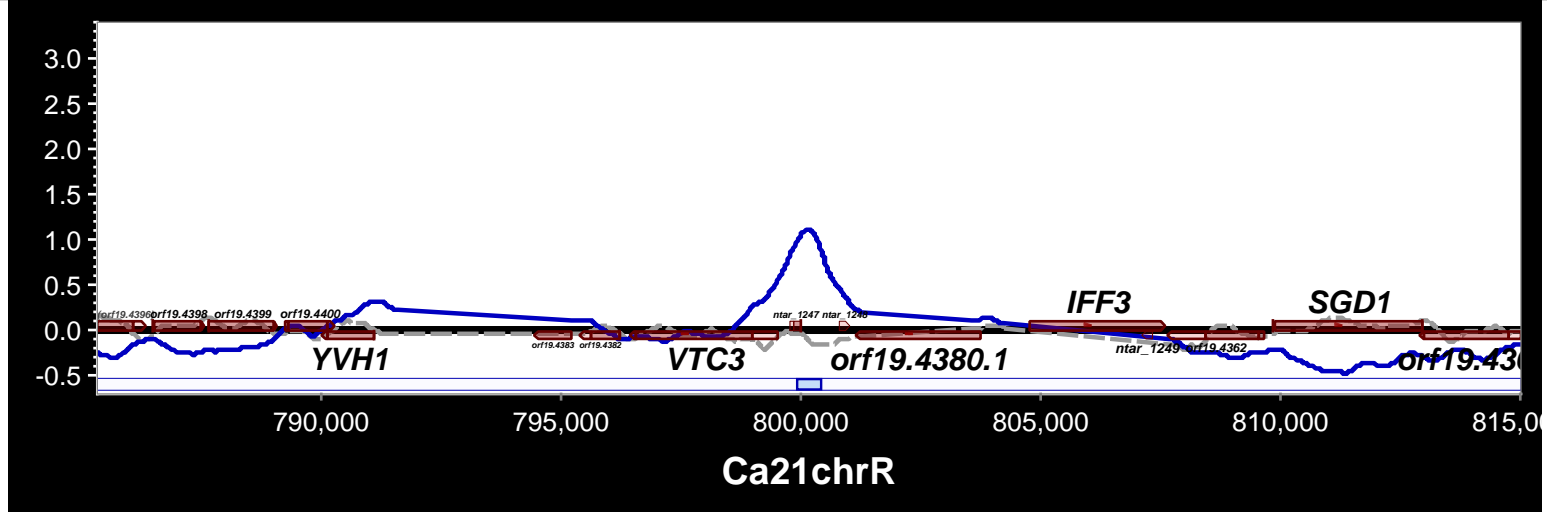

[1.1] Ca21chr6:825802-855485 [+] [IHD1, PGA61, tA(UGC)2, orf19.5763, SNQ2]

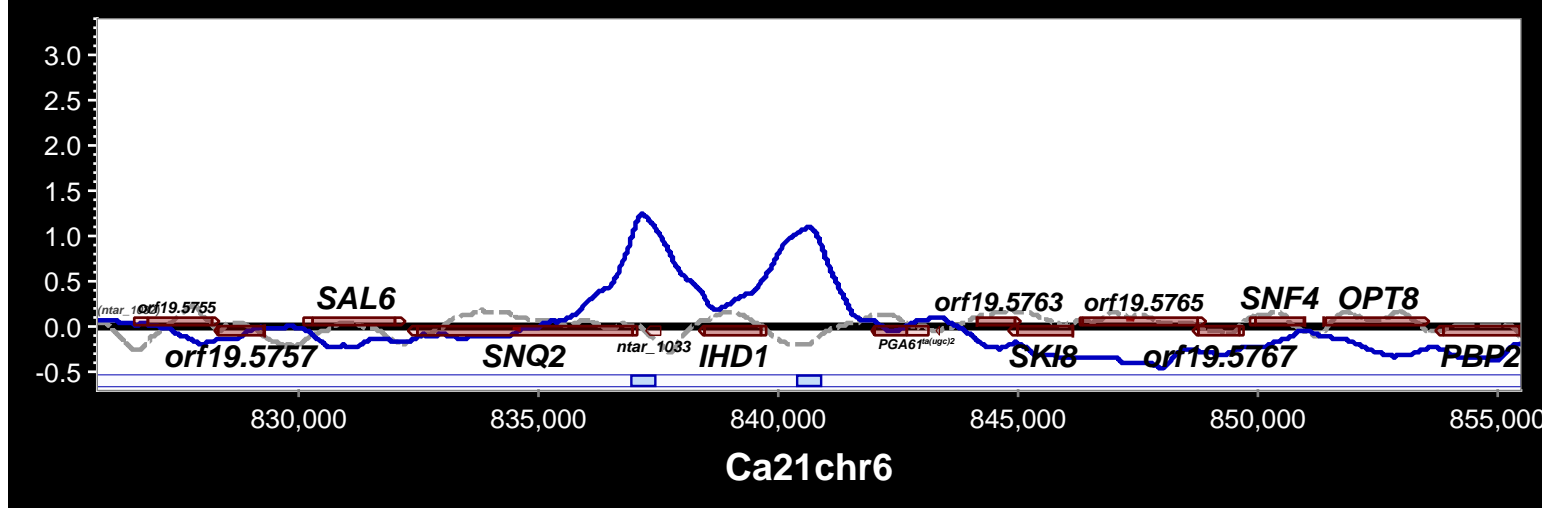

[1.098] Ca21chr3:1110028-1139711 [+] [RHB1, MCA1, RPS19A, WOR2, DYN1]

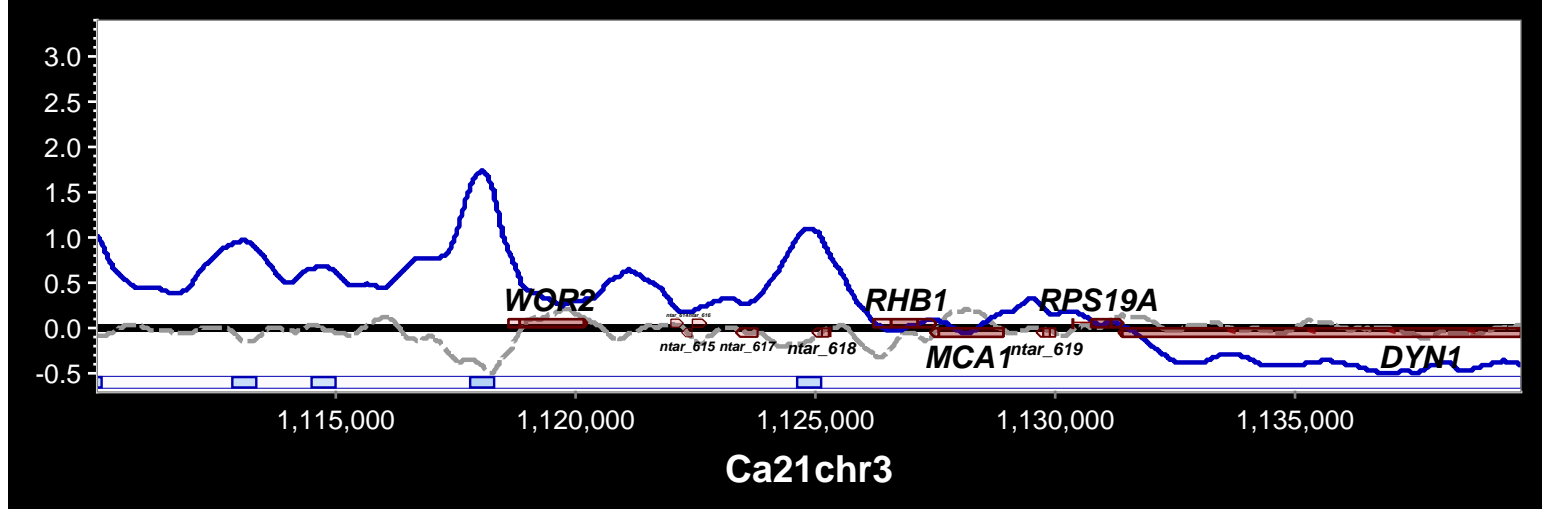

[1.098] Ca21chr3:1349926-1379609 [+] [CAM1, orf19.7381, MNN9, NOG1, orf19.7385]

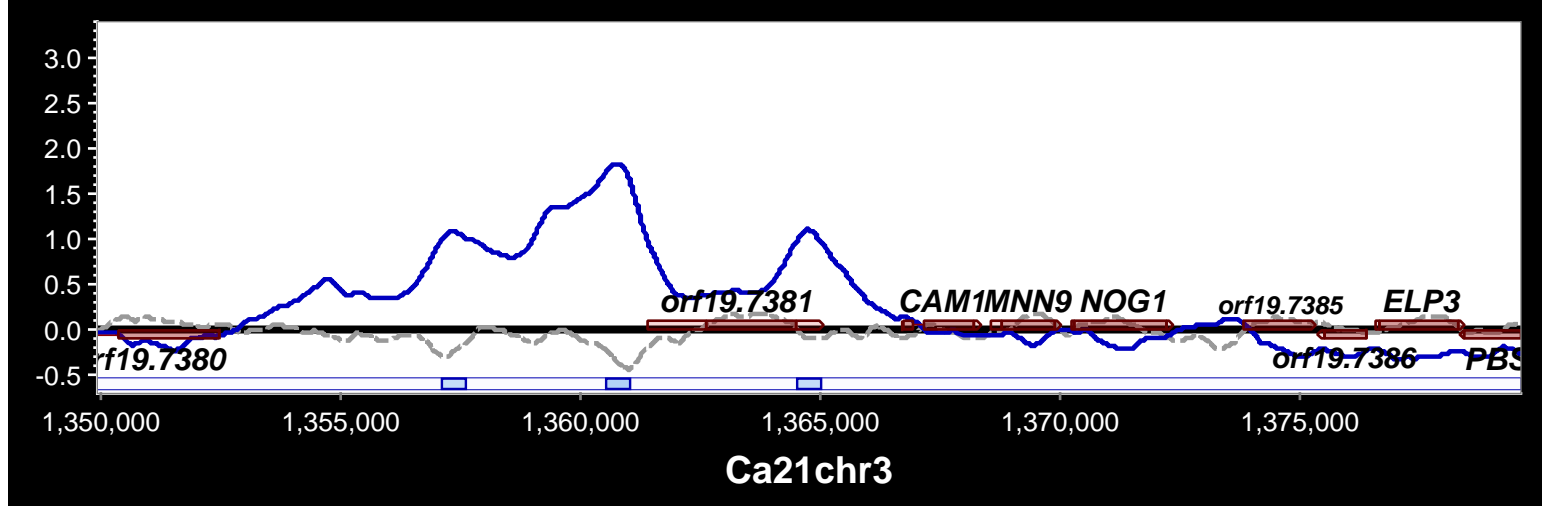

[1.097] Ca21chr5:935566-965249 [+] [GLN3, orf19.3914, SAH1, orf19.3915, orf19.3916]

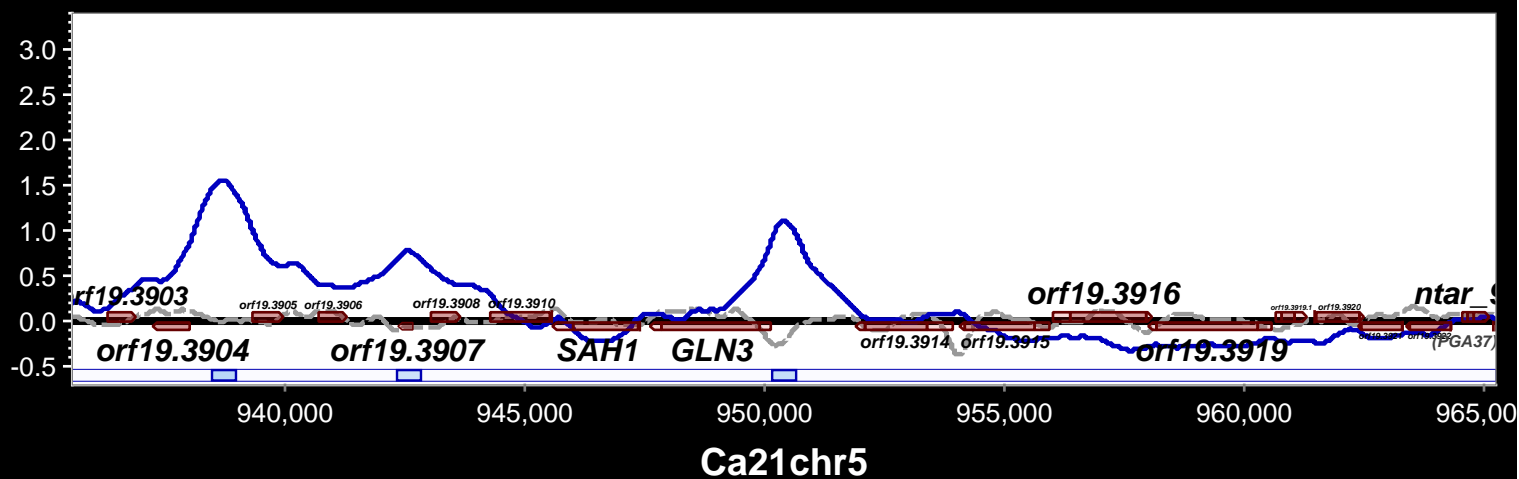

[1.096] Ca21chr5:30704-60387 [+] [PGA14, orf19.967, orf19.969, orf19.966, orf19.970]

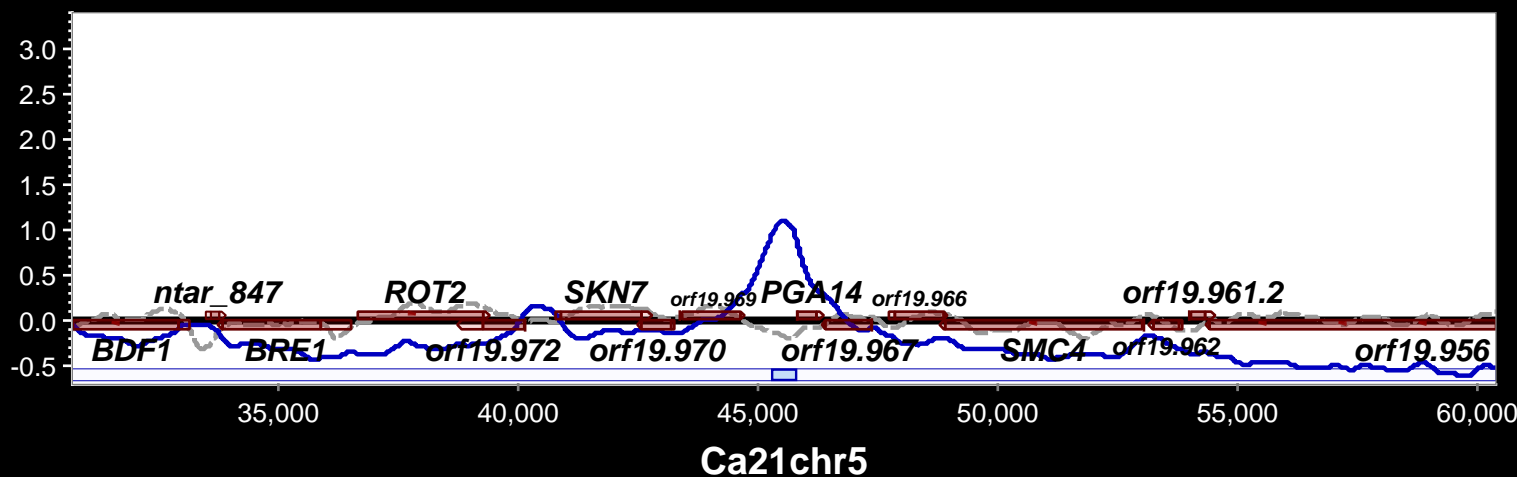

[1.093] Ca21chr1:232969-262652 [+] [orf19.3310, IFD3, orf19.3312, orf19.3309, orf19.3314]

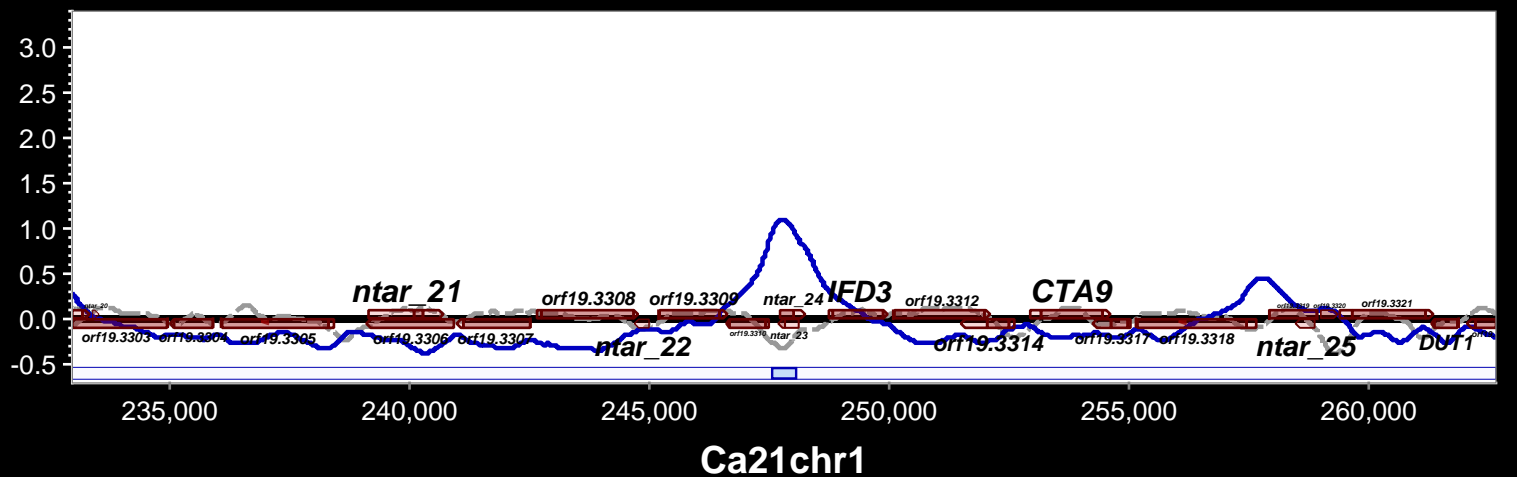

[1.092] Ca21chr2:754574-784257 [+] [UGA11, tE(CUC)1, IFK2, SAP99, FMO2]

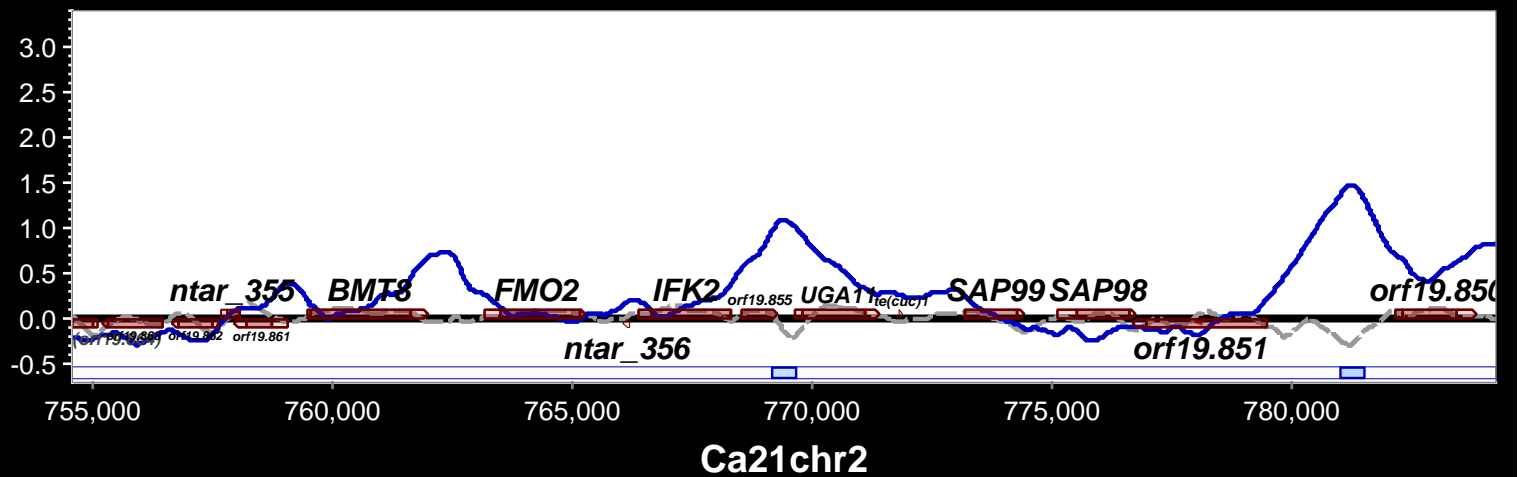

[1.092] Ca21chr2:1187557-1217240 [+] [orf19.5210, IDP1, orf19.5209, orf19.5212, orf19.5213]

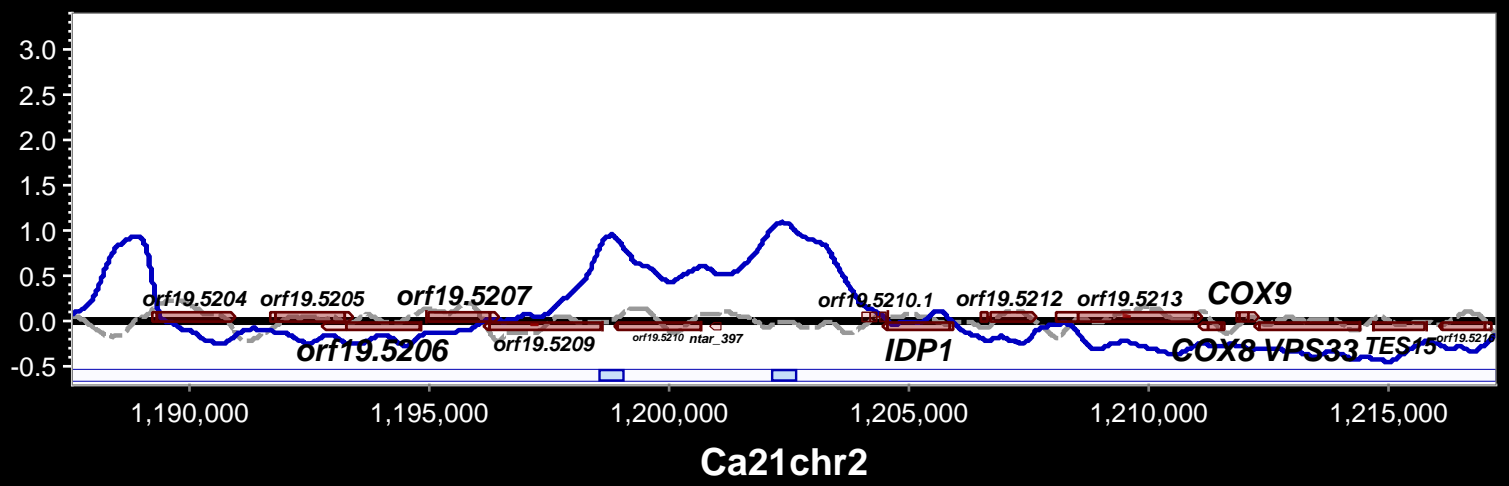

[1.092] Ca21chr3:171296-200979 [+] [orf19.6169, orf19.6168, orf19.2496, AYR1, orf19.2498]

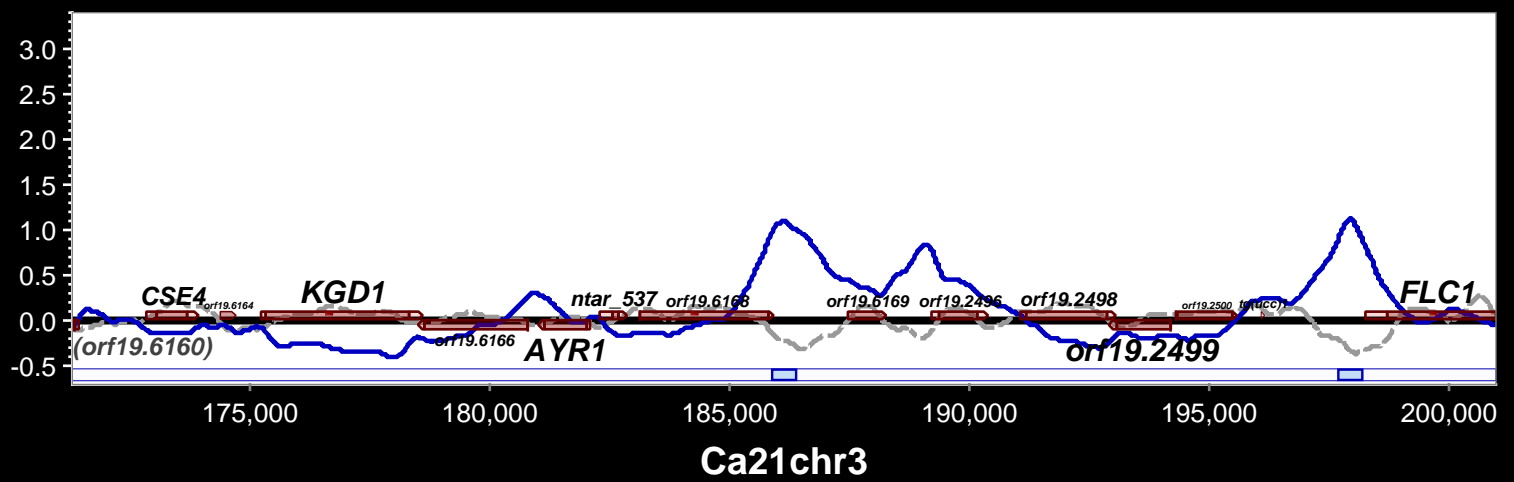

[1.091] Ca21chr6:311725-341408 [+] [orf19.3428, FGR47, orf19.3427, ANB1, orf19.3430]

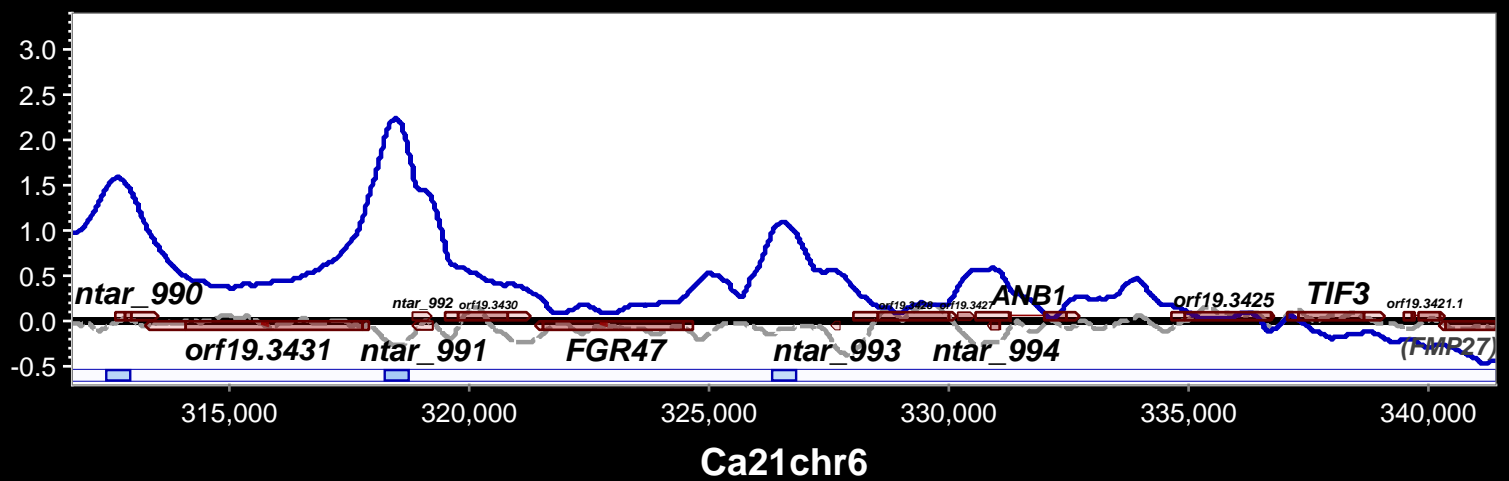

[1.09] Ca21chr6:149717-179400 [+] [GPX2, orf19.86, CAN3, GPX1, SUN41]

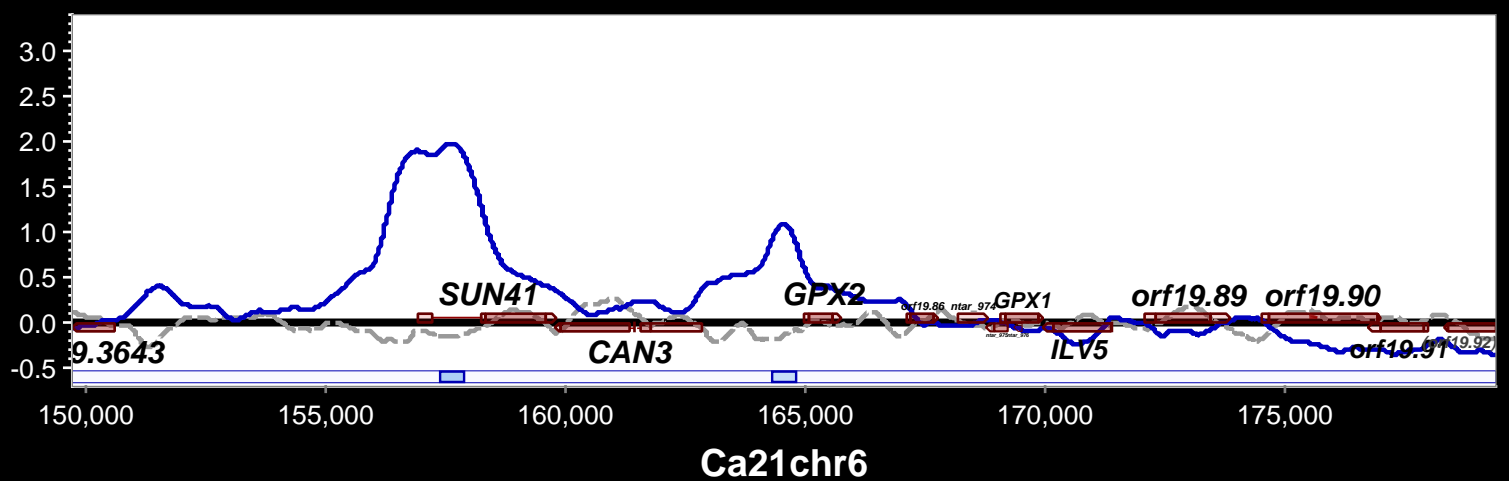

[1.088] Ca21chr1:1190118-1219801 [+] [PGA26, orf19.2476, PRC3, orf19.2473, orf19.2472.1]

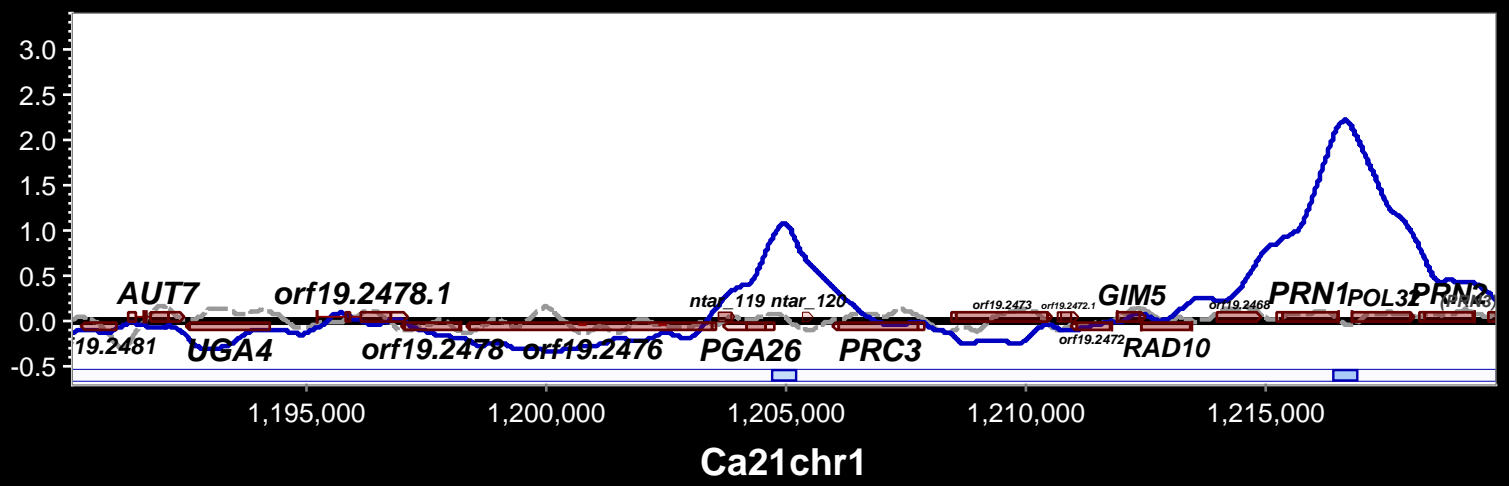

[1.088] Ca21chr2:1622324-1652007 [+] [SIT1, orf19.2178.1, orf19.2178, RPS10, orf19.2177]

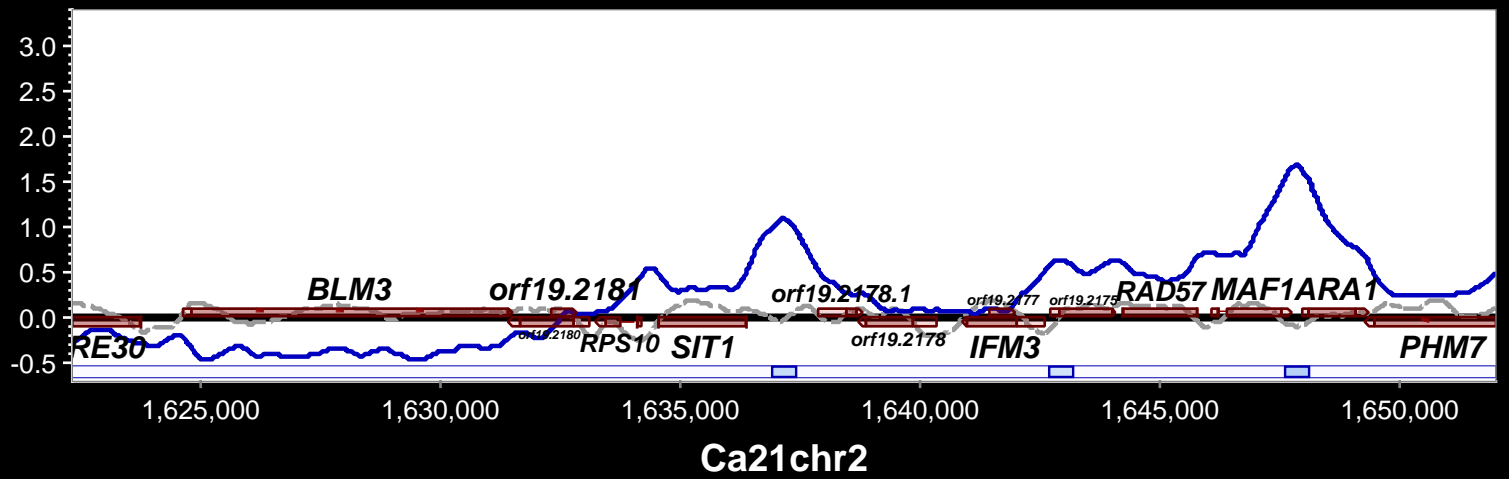

[1.088] Ca21chr3:1095026-1124709 [+] [orf19.5991, orf19.5989, orf19.5987, THI4, WOR2]

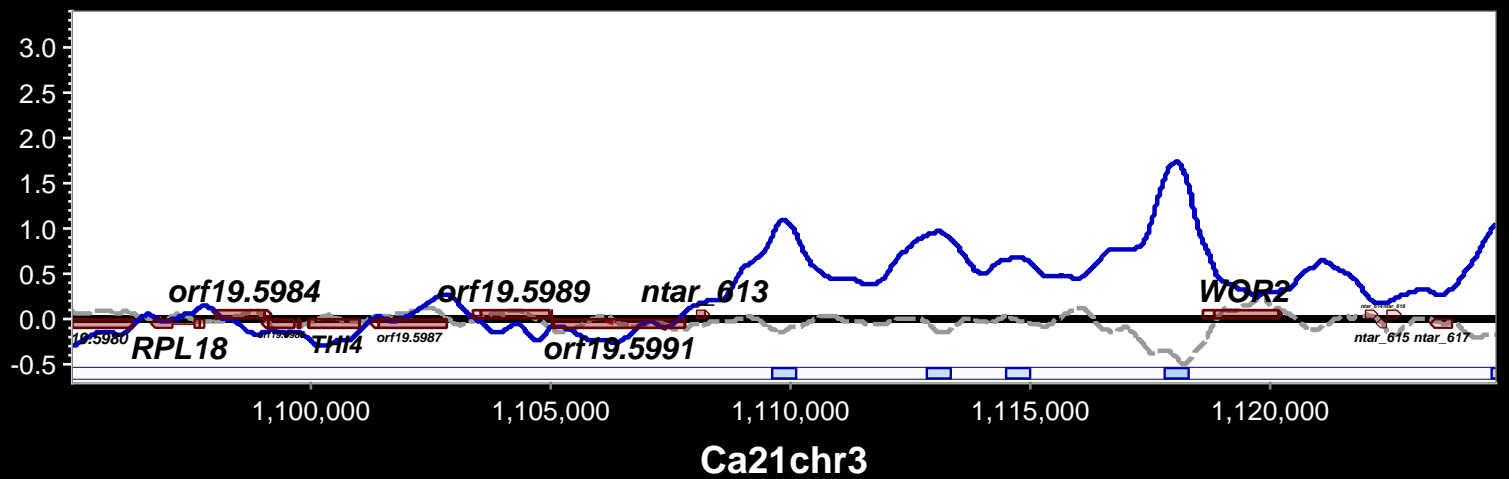

[1.087] Ca21chr1:1489181-1518864 [+] [orf19.6200, orf19.6199, orf19.6198.1, RBT4, orf19.6203]

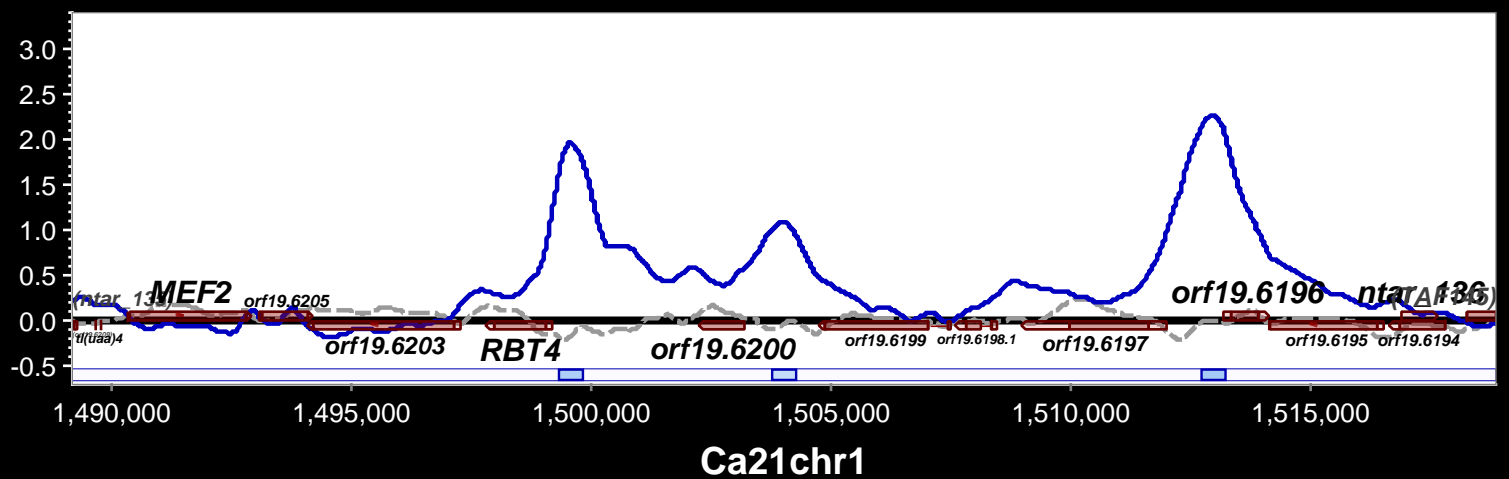

[1.087] Ca21chr4:892865-922548 [+] [orf19.1426, orf19.1424, orf19.1427, orf19.1428, FZO1]

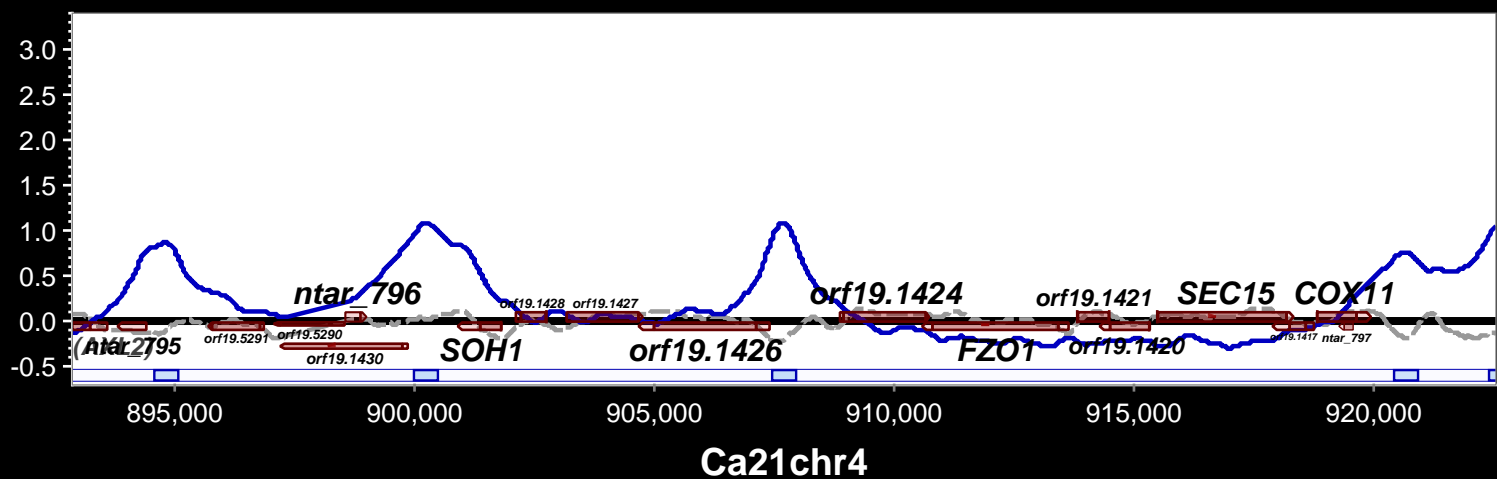

[1.086] Ca21chr6:458883-488566 [+] [orf19.3469, ALG11, orf19.3467, orf19.3470, orf19.3471]

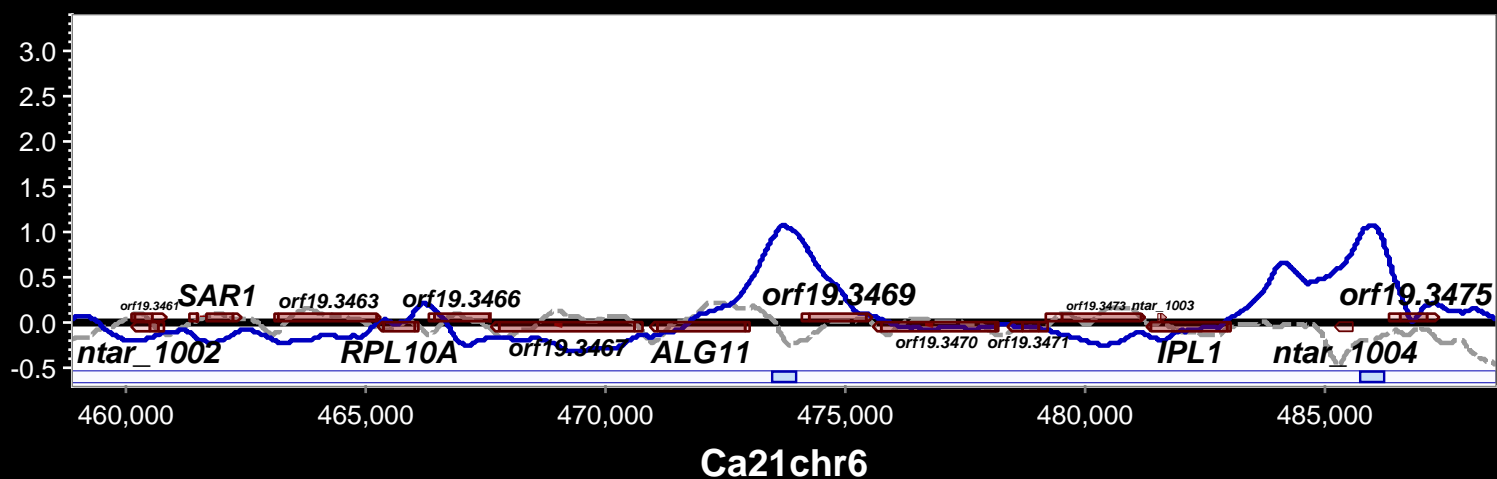

[1.085] Ca21chr5:246082-275765 [+] [CYC3, orf19.1956, orf19.1955, PUS4, orf19.1953]

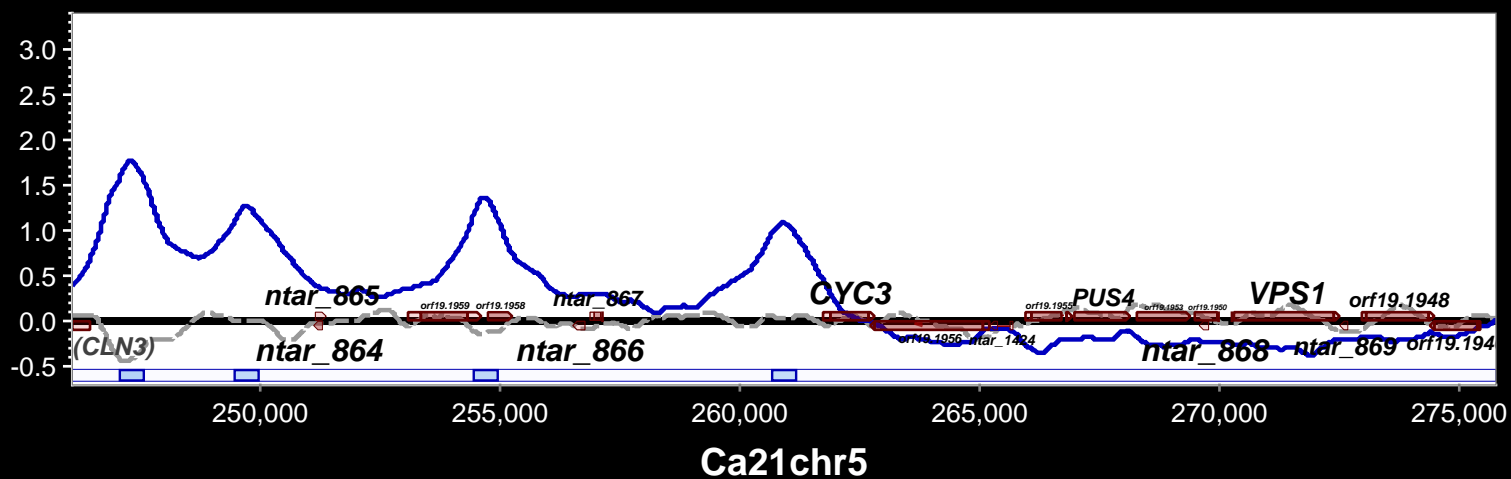

[1.085] Ca21chr7:734406-764089 [+] [orf19.1335, orf19.1334, PUP3, orf19.1336.2, orf19.1338]

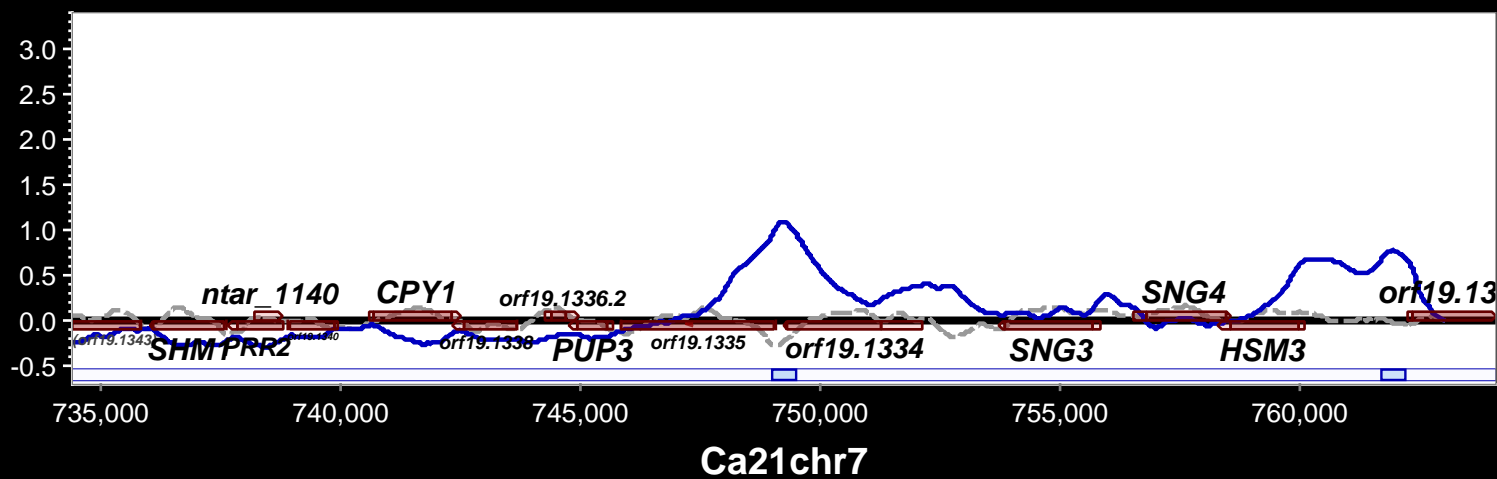

[1.084] Ca21chr3:1342519-1372202 [+] [orf19.7380, orf19.7381, CAM1, FAA2, MNN9]

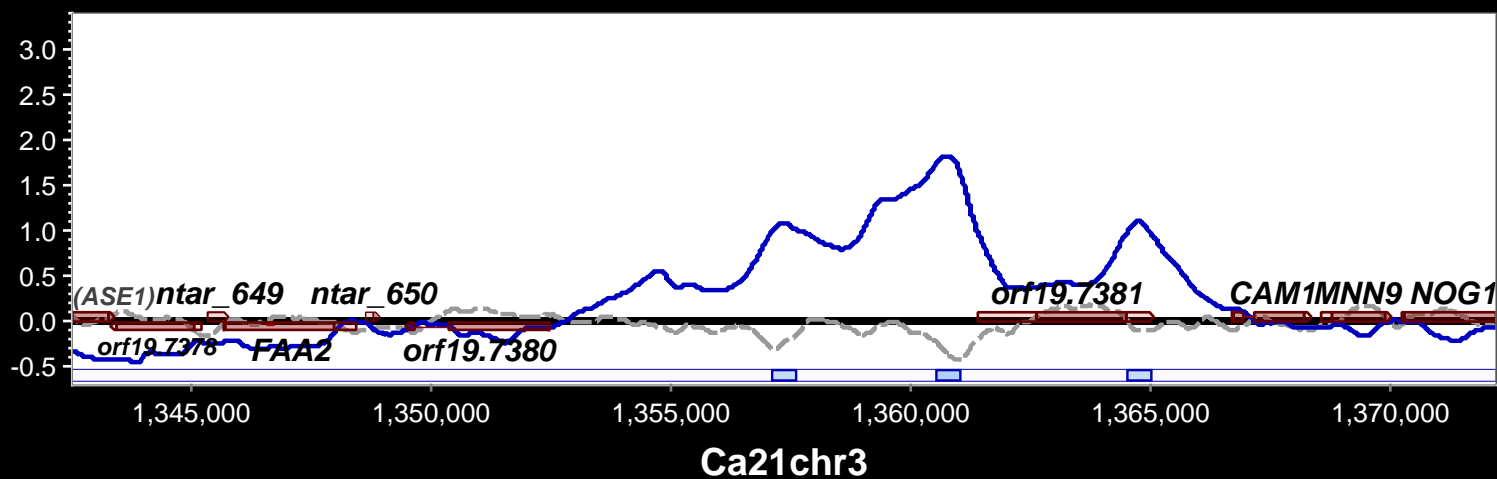

[1.083] Ca21chr1:528814-558497 [+] [SNO1, SNZ1, orf19.2949, HNM4, PUT4]

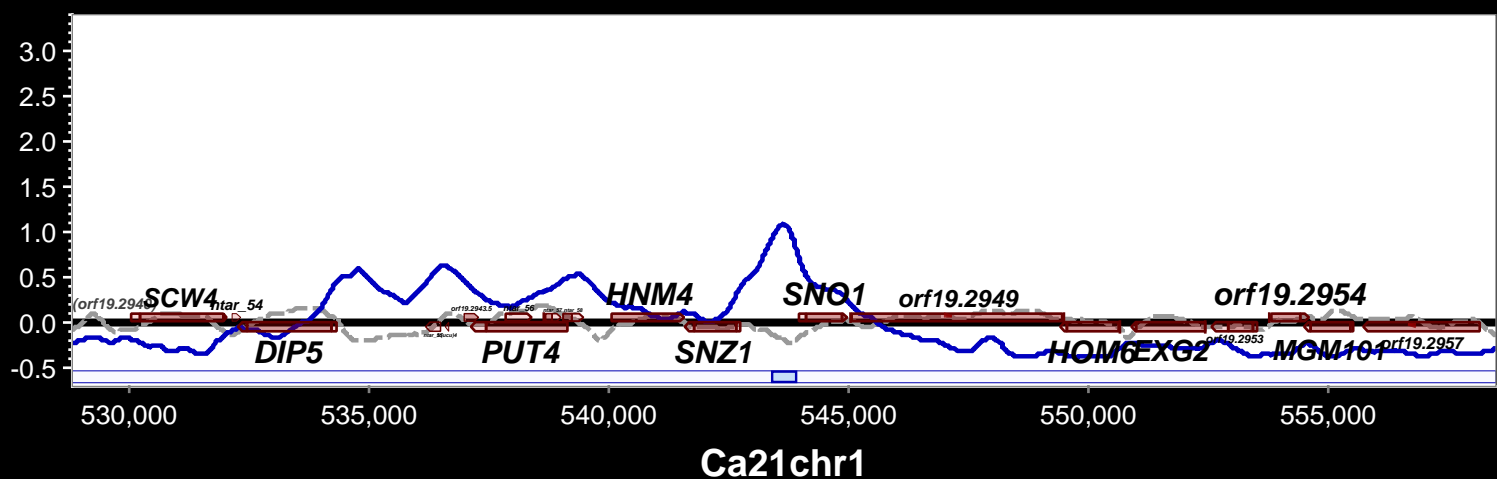

[1.082] Ca21chr1:3098132-3127815 [+] [FTR1, RBE1, RPL4B, SET3, orf19.7216]

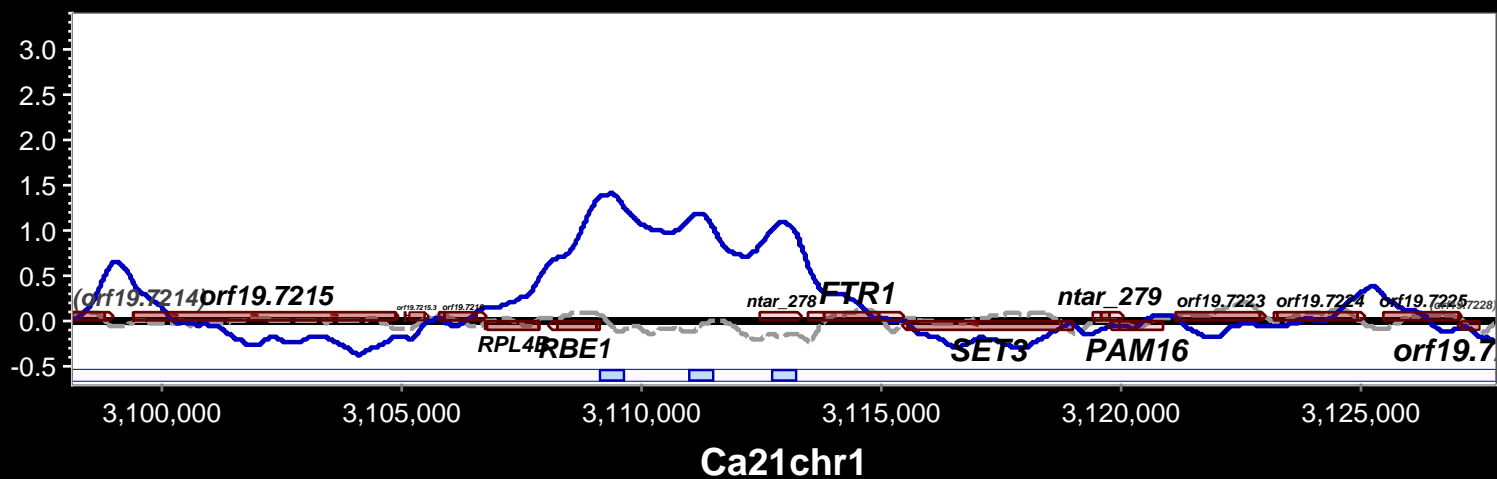

[1.082] Ca21chr7:708517-738200 [+] [RBR3, LIP8, orf19.5125, orf19.1344, orf19.1343]

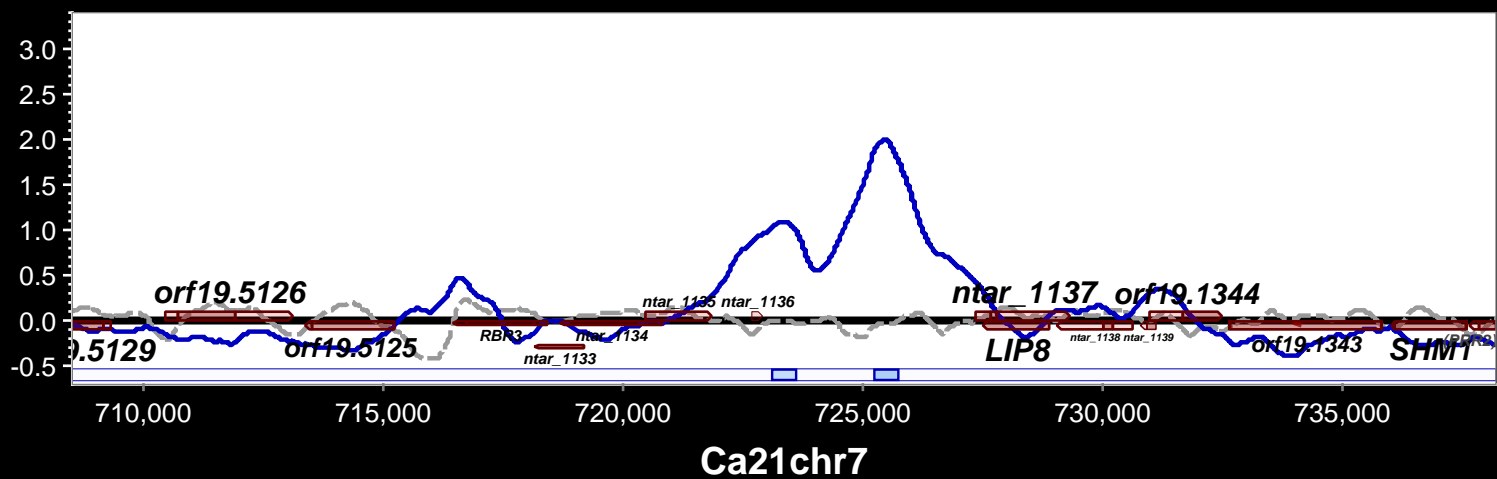



[1.08] Ca21chr4:885396-915079 [+] [orf19.1430, SOH1, orf19.1428, orf19.1427]

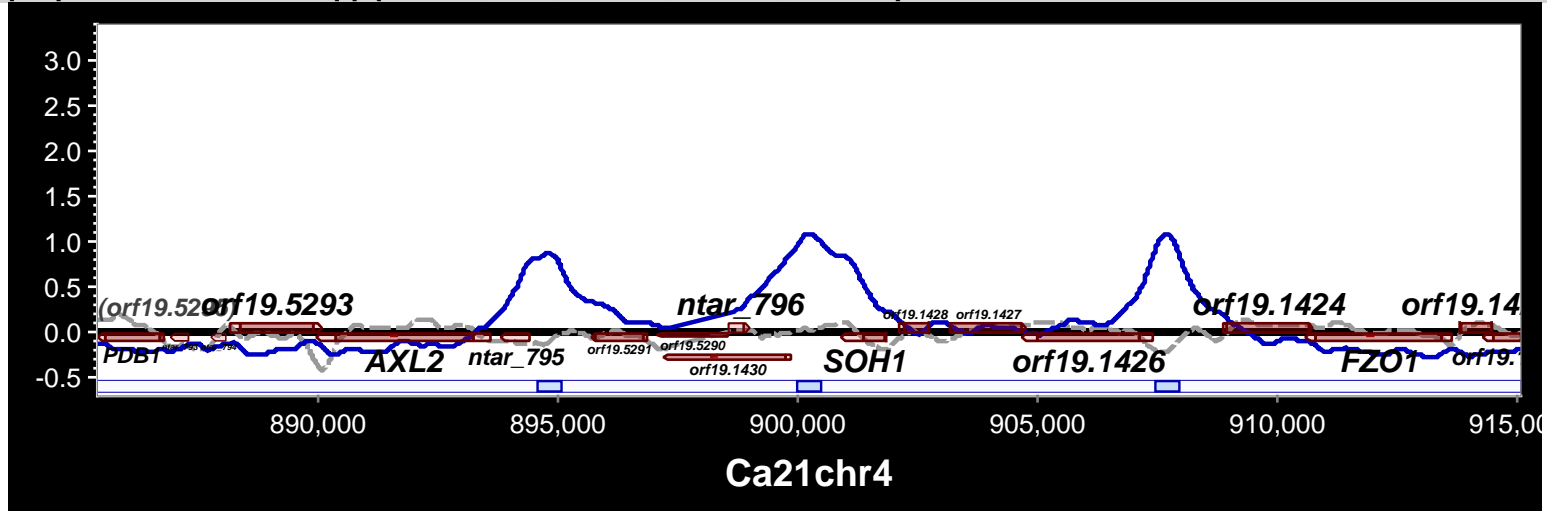

[1.079] Ca21chr5:455177-484860 [+] [CEN5, orf19.3159.4, HSP12, orf19.4216, orf19.3161]

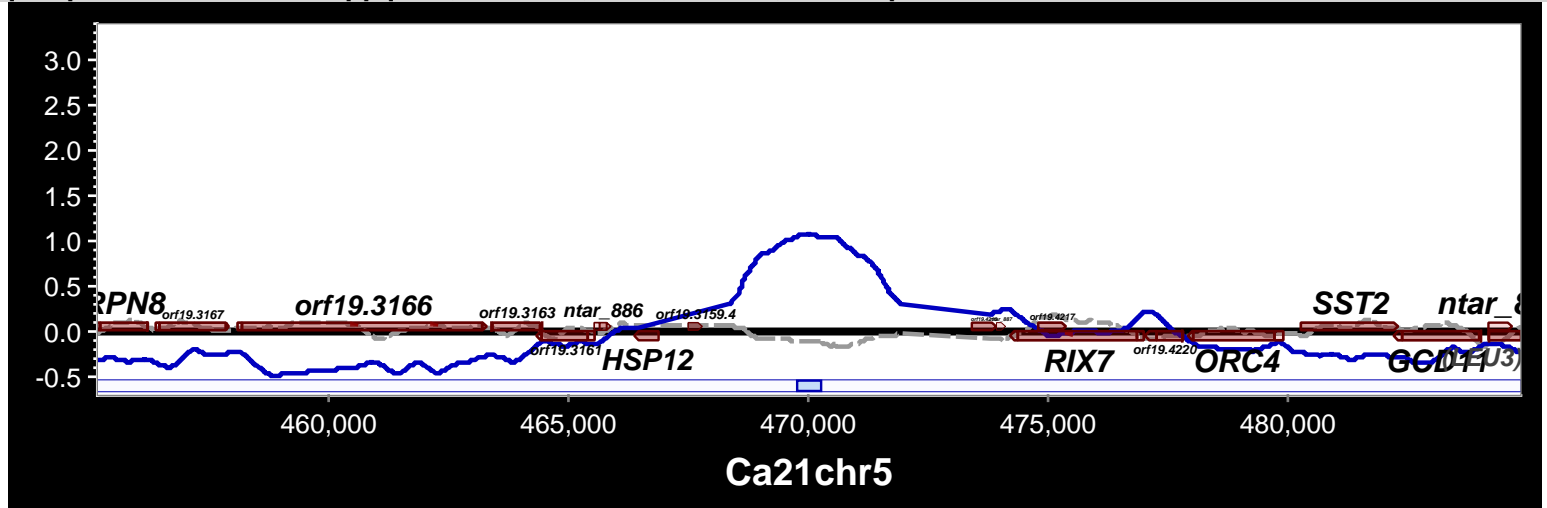

[1.078] Ca21chr6:471143-500826 [+] [orf19.3475, IPL1, orf19.3476, orf19.3473, orf19.3477]

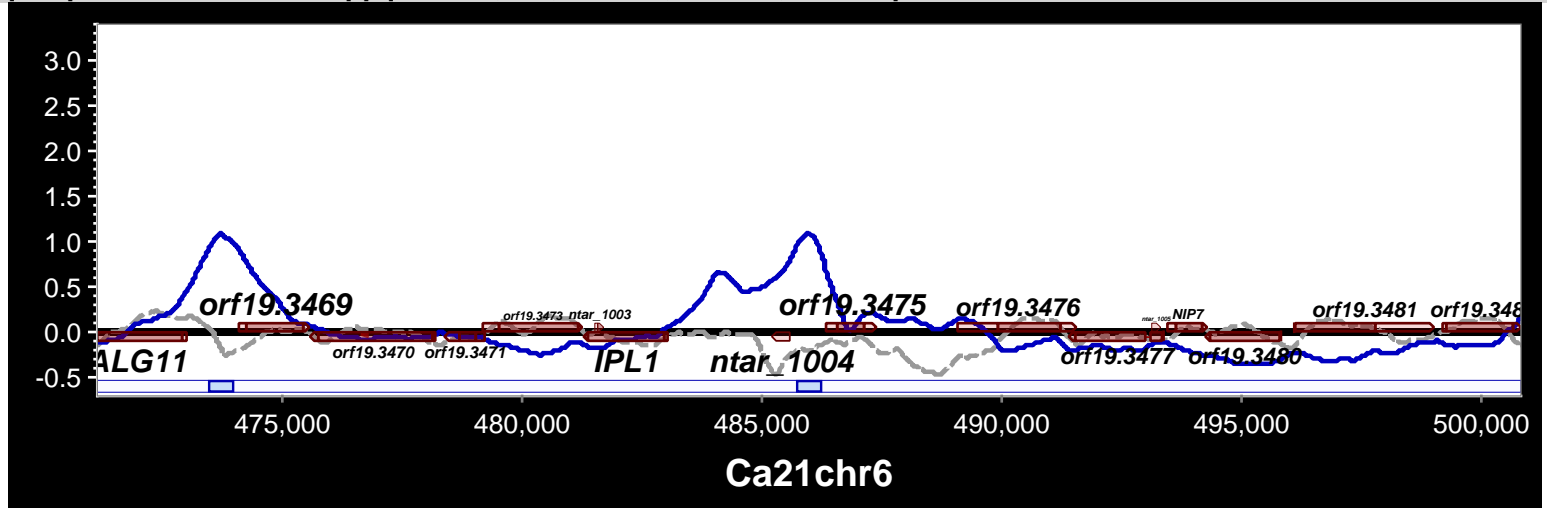

[1.075] Ca21chr3:551539-581222 [+] [orf19.251, orf19.252, SLC1, orf19.254, orf19.255]

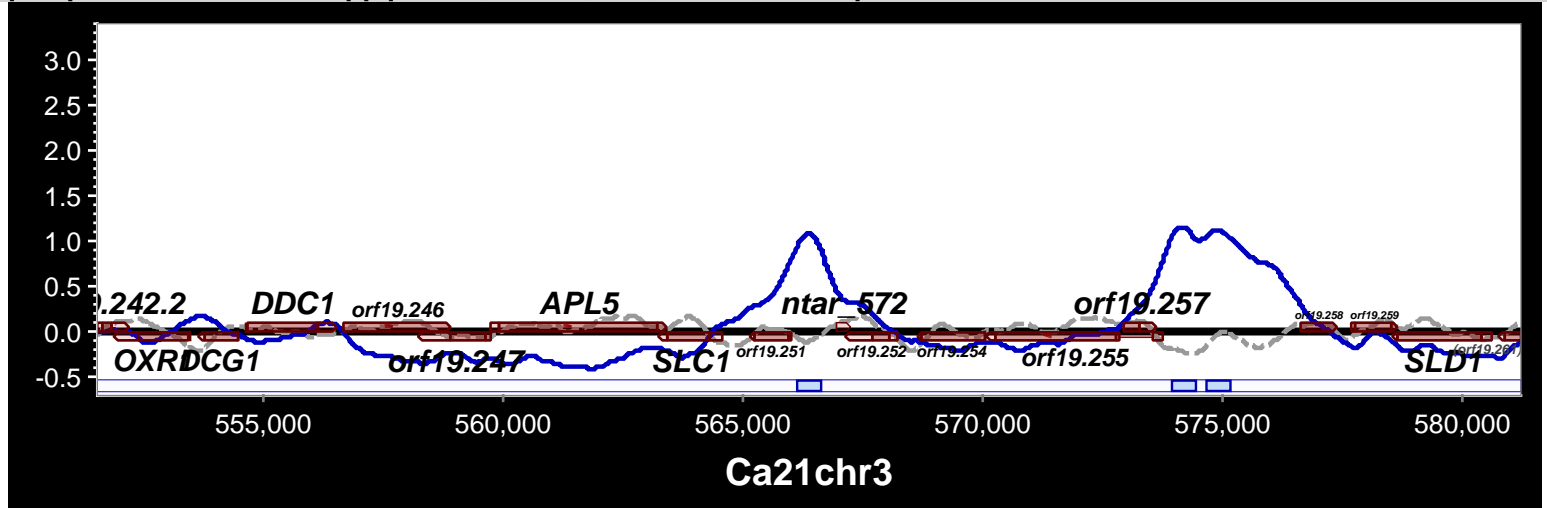

[1.075] Ca21chr6:1003847-1033530 [+] [HXK1, NAG6, orf19.2150, orf19.2149, NAG1]

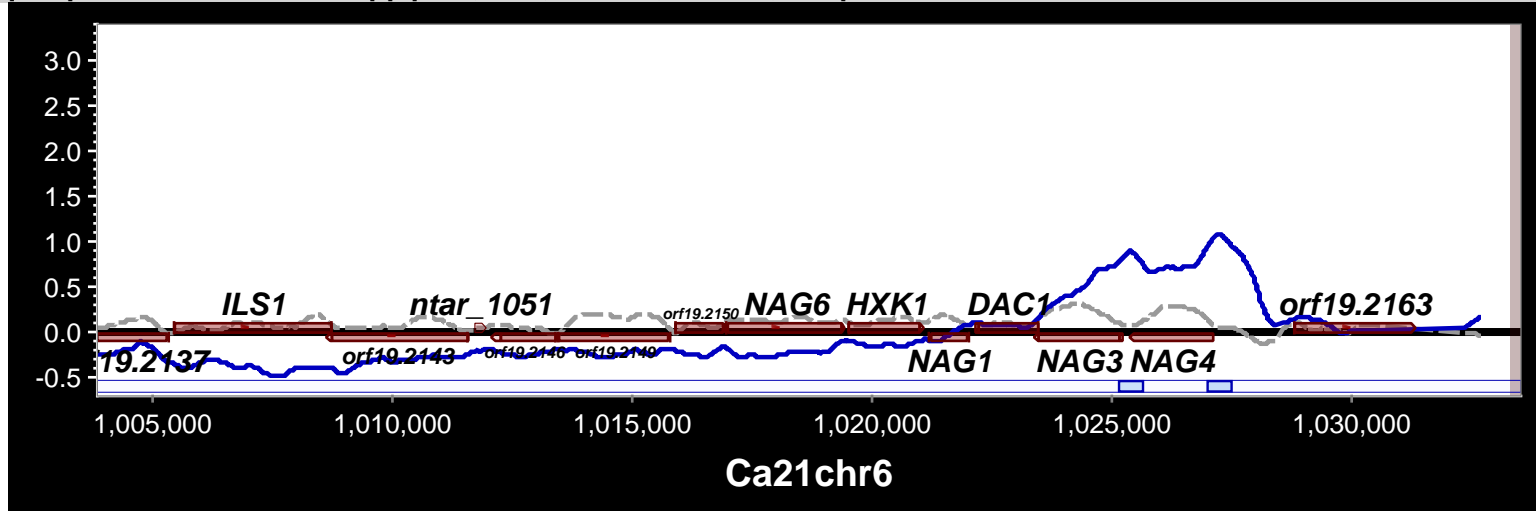

[1.074] Ca21chr7:769200-798883 [+] [ENP2, orf19.6687, ISY1, PNC1, orf19.6688]

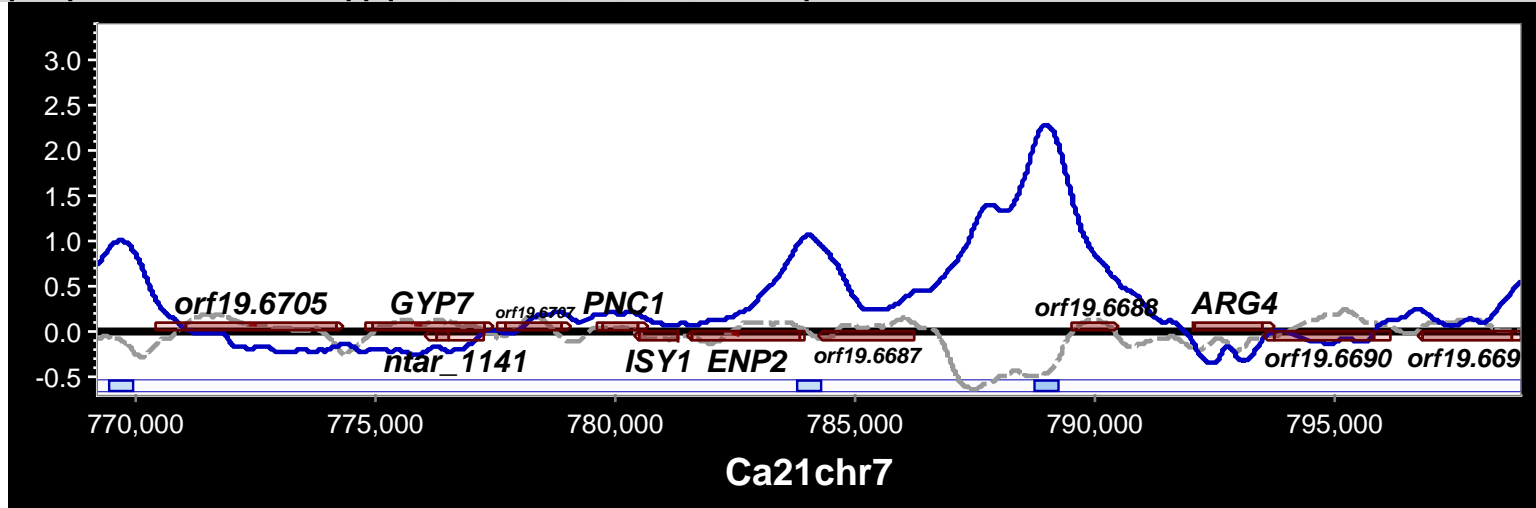

[1.071] Ca21chr2:108381-138064 [+] [FGR15, NPL6, orf19.2051, orf19.2050, orf19.2057]

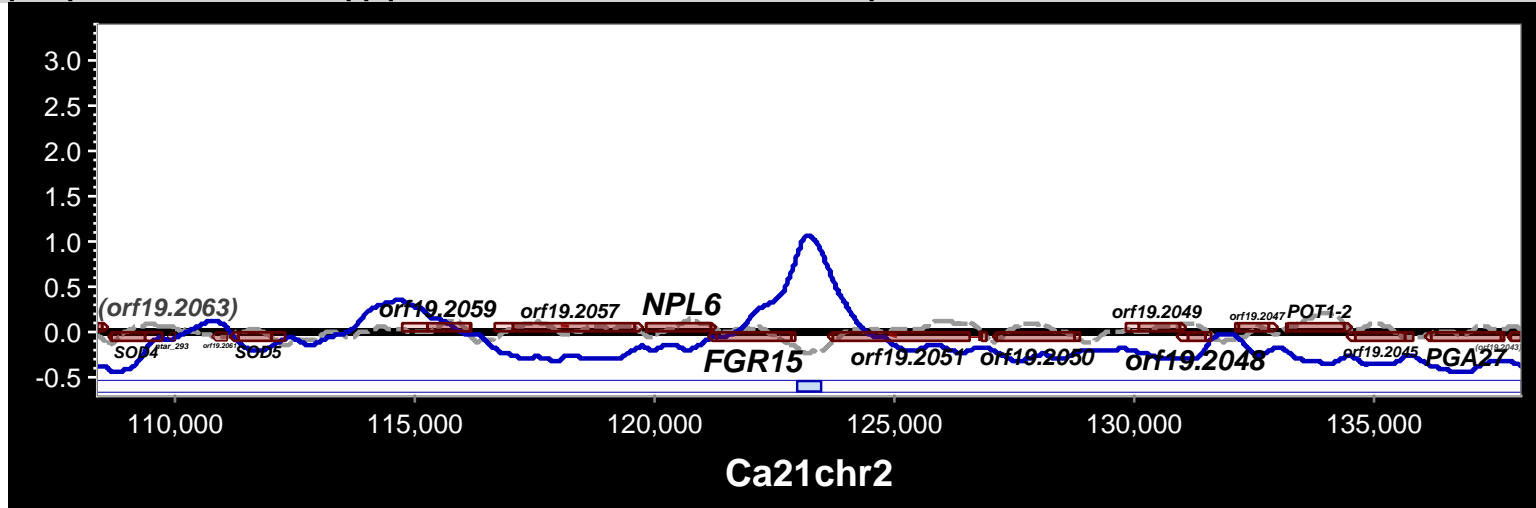

[1.062] Ca21chr3:1024597-1054280 [+] [tk(CUU)2, orf19.5952, orf19.5953, FAS2, orf19.5954]

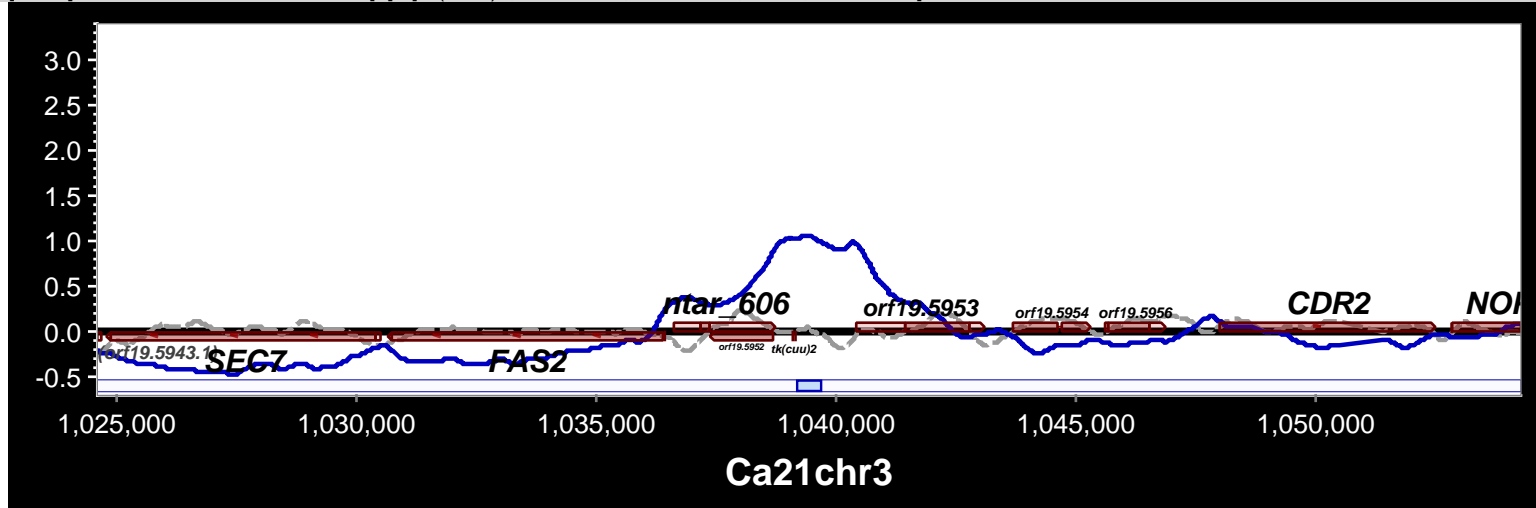

[1.059] Ca21chr5:298146-327829 [+] [SEF2, SNM1, CFL5, orf19.4131, orf19.4132]

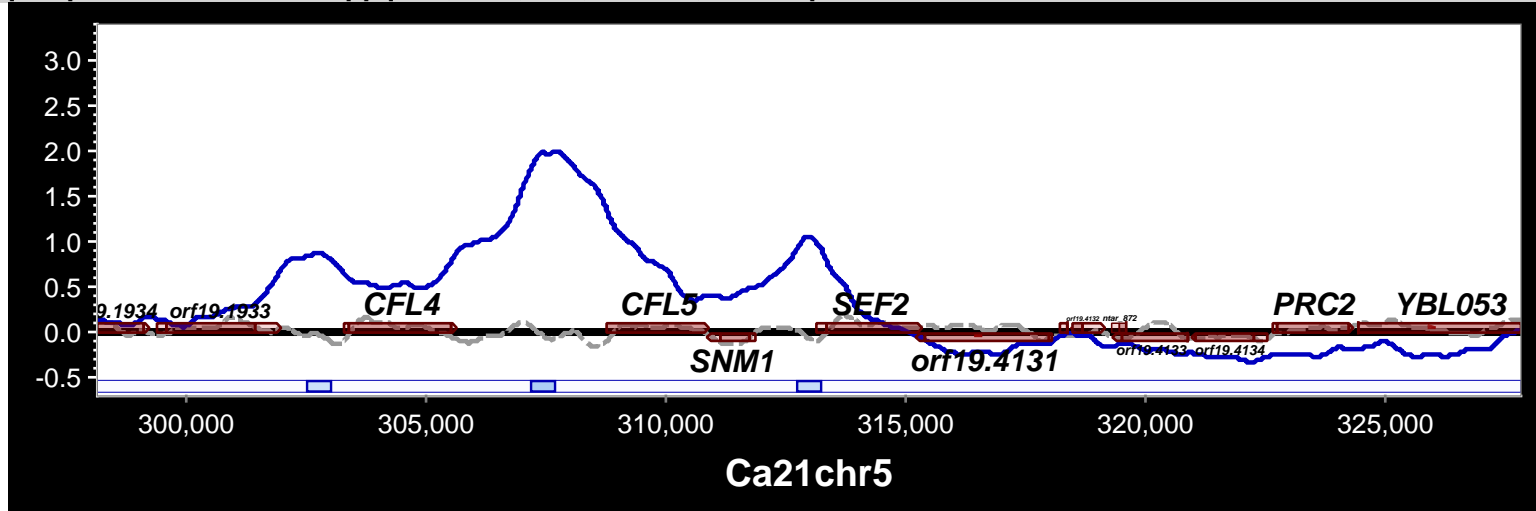

[1.058] Ca21chr2:720991-750674 [+] [ADAEC, orf19.871, orf19.872, orf19.873, orf19.867]

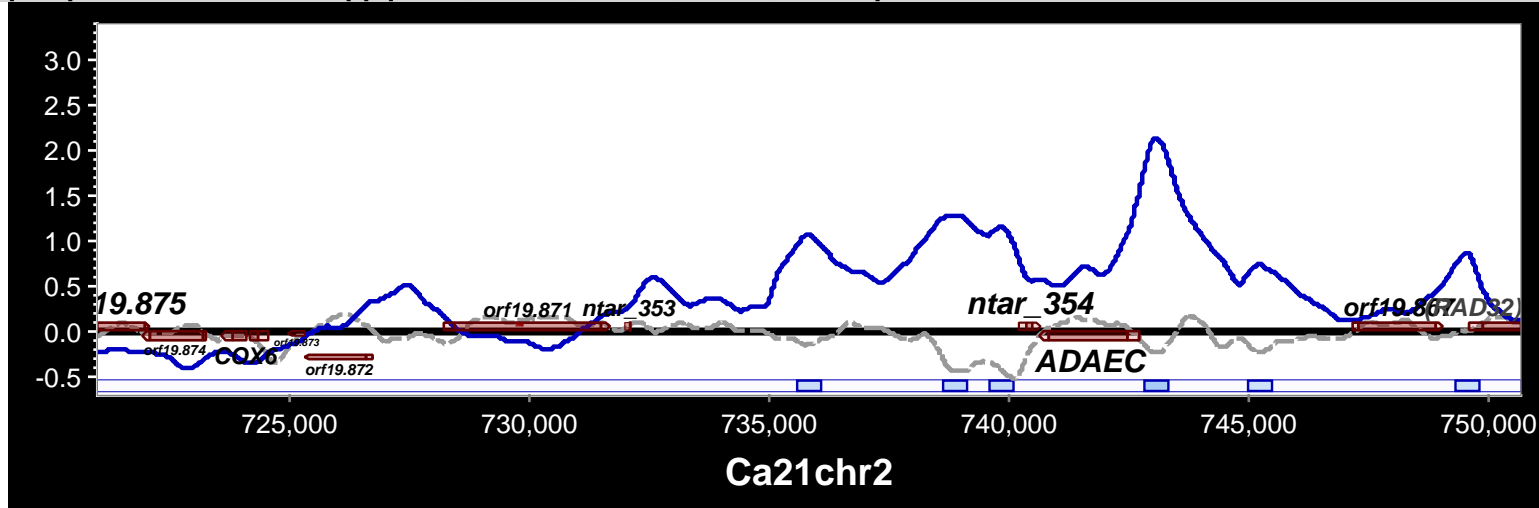

[1.058] Ca21chr3:633956-663639 [+] [PGA18, orf19.302, orf19.304, orf19.305, AIP2]

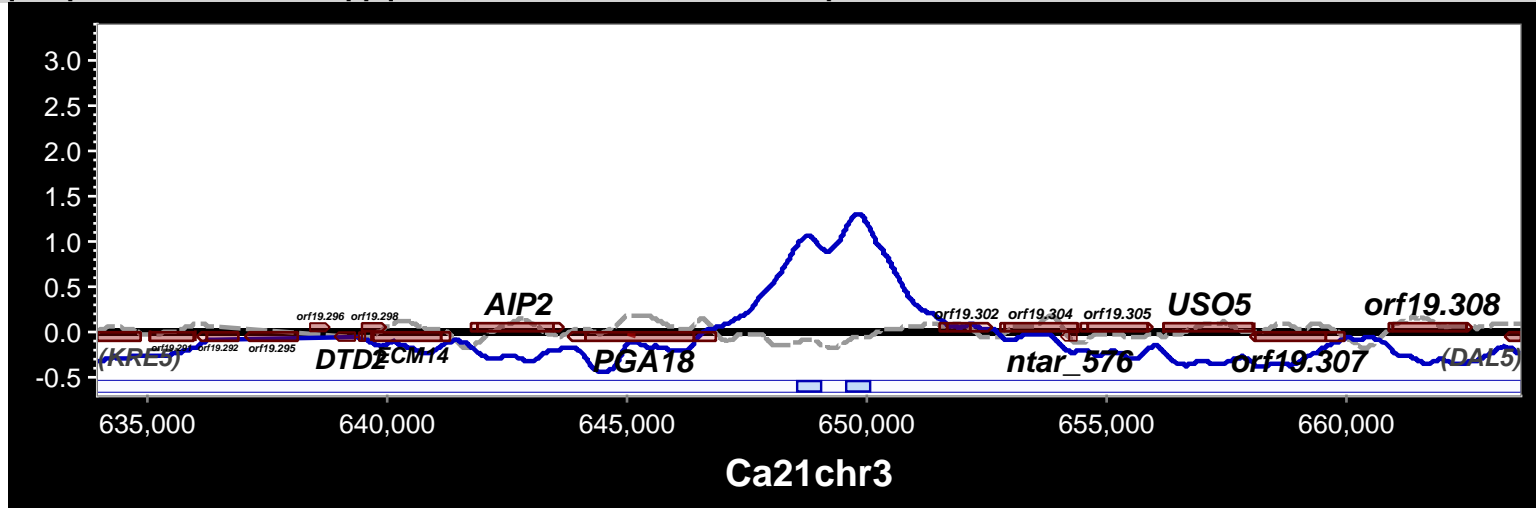

[1.057] Ca21chr3:767218-796901 [+] [CCC1, orf19.6950, GTT11, PHB1, orf19.6951]

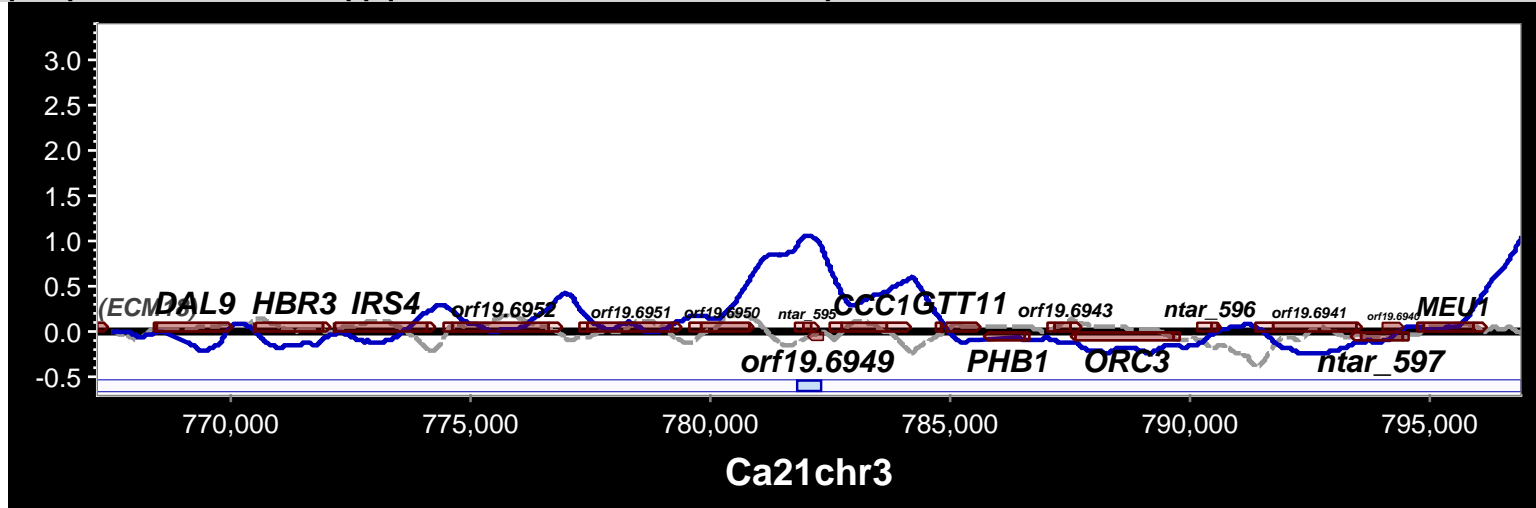

[1.056] Ca21chr1:1133730-1163413 [+] [orf19.417, orf19.416, orf19.415, orf19.414, KOG1]

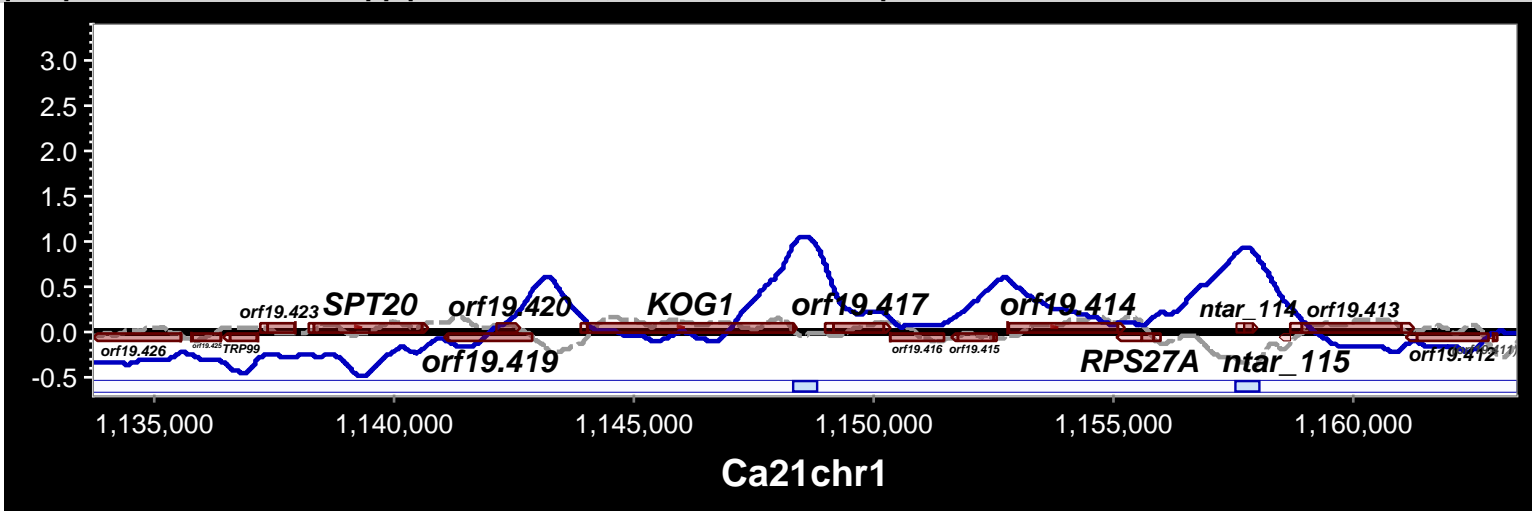

[1.054] Ca21chr3:1481800-1511483 [+] [orf19.7445, orf19.7444, OPI3, orf19.7443, orf19.7442]

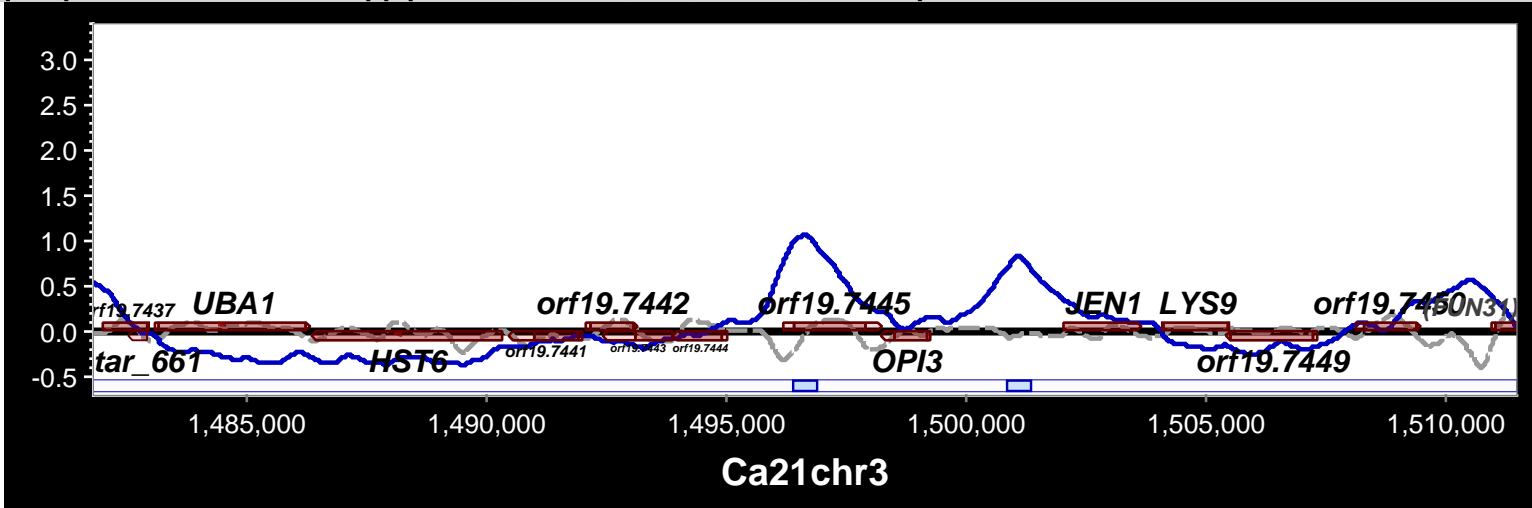

[1.052] Ca21chr1:158548-188231 [+] [orf19.6017, orf19.6016, LRO1, orf19.6020, RRS1]

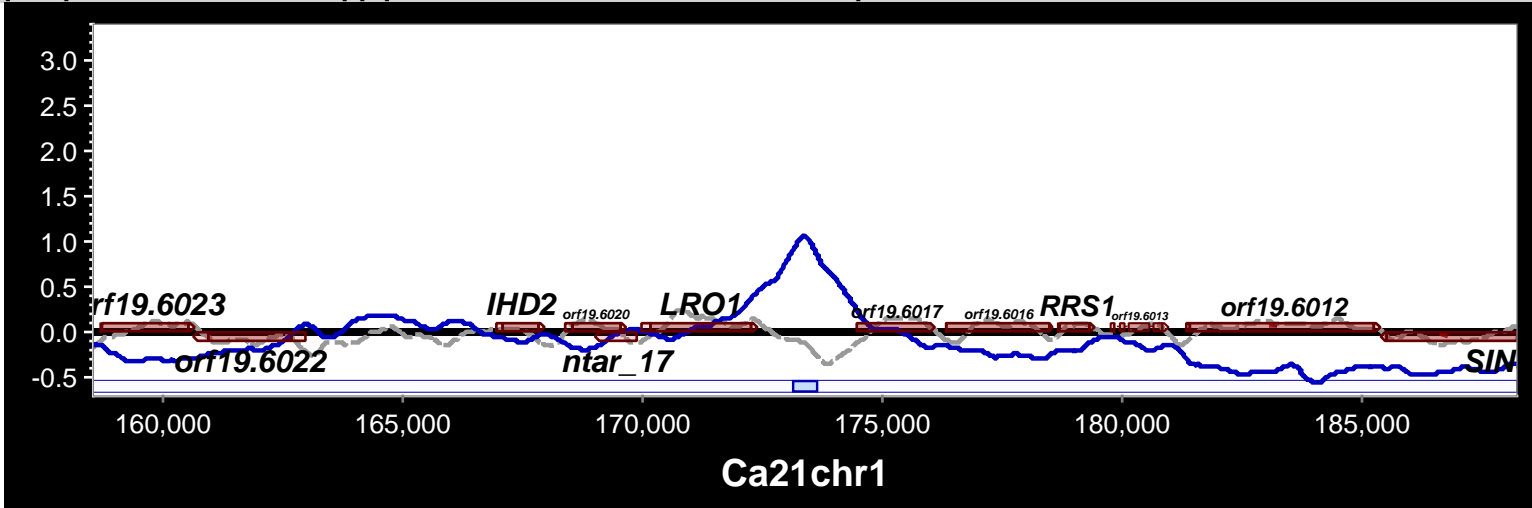

[1.052] Ca21chr1:276671-306354 [+] [orf19.3335, RPS21, orf19.3333, orf19.3332, orf19.3337]

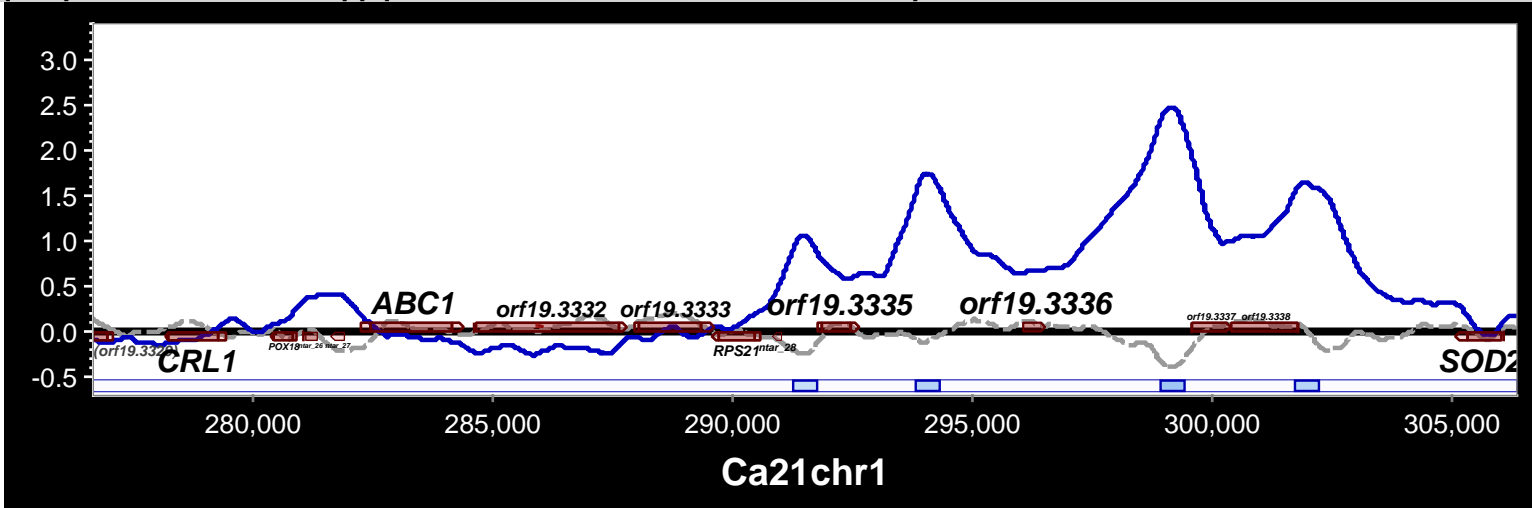

[1.051] Ca21chrR:1700222-1729905 [+] [tg(GCC)1, orf19.612, ASF1, orf19.3714, EFG1]

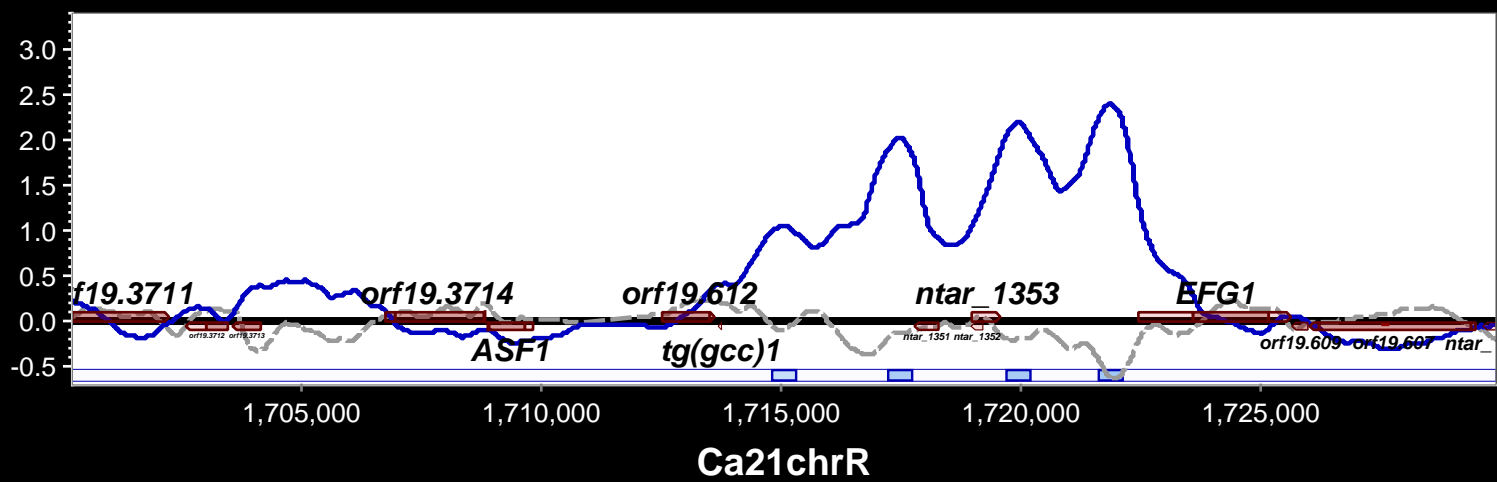

[1.05] Ca21chr2:386671-416354 [+] [orf19.1522, FMO1, SPR3, orf19.1525, orf19.1519]

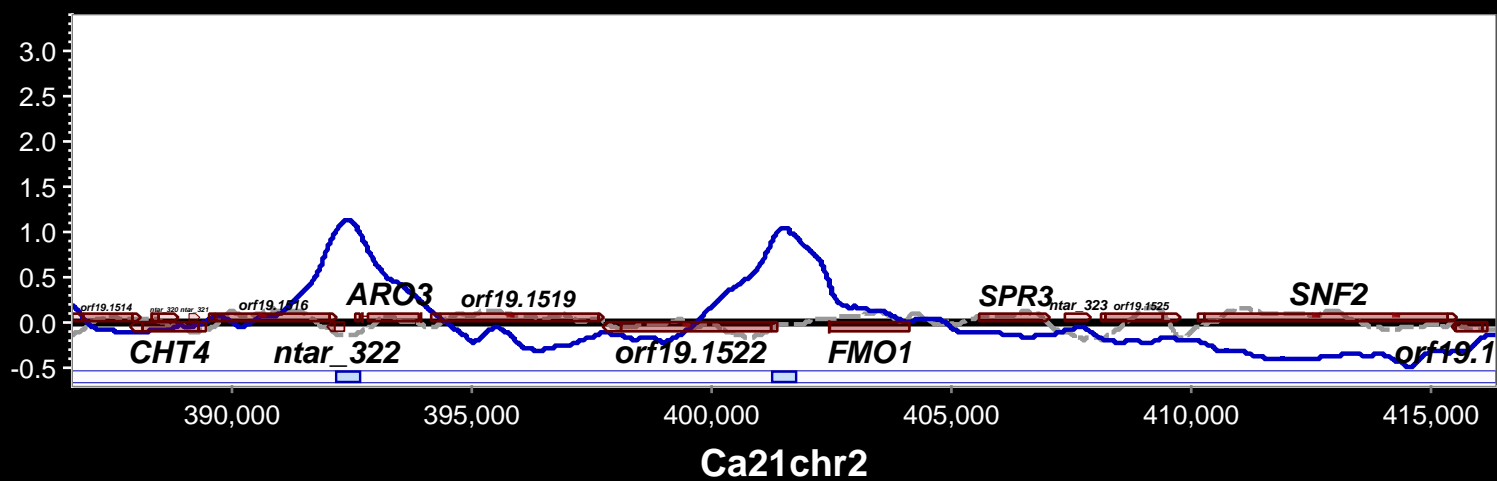

[1.049] Ca21chr4:907812-937495 [+] [FRE10, COX11, orf19.1414, orf19.1417, YFH1]

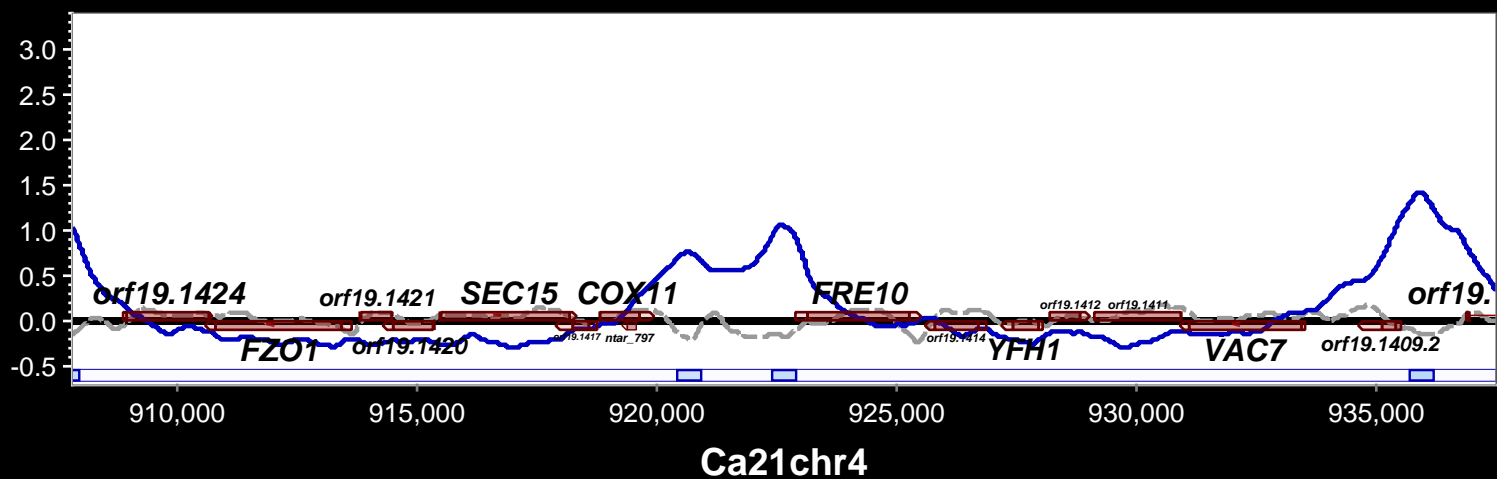

[1.049] Ca21chr4:1525986-1555669 [+] [CSA2, EXM2, orf19.3120, orf19.3115, orf19.3114]

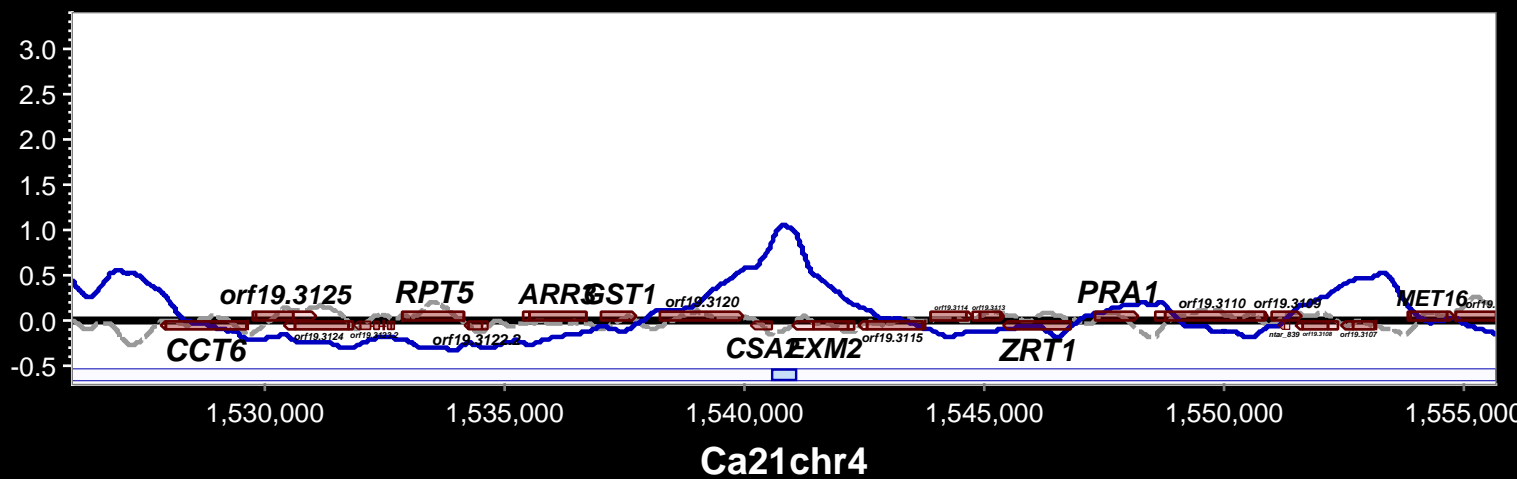

[1.042] Ca21chr2:1217034-1246717 [+] [CNT, orf19.4117, orf19.4116, tM(CAU)3, SPO72]

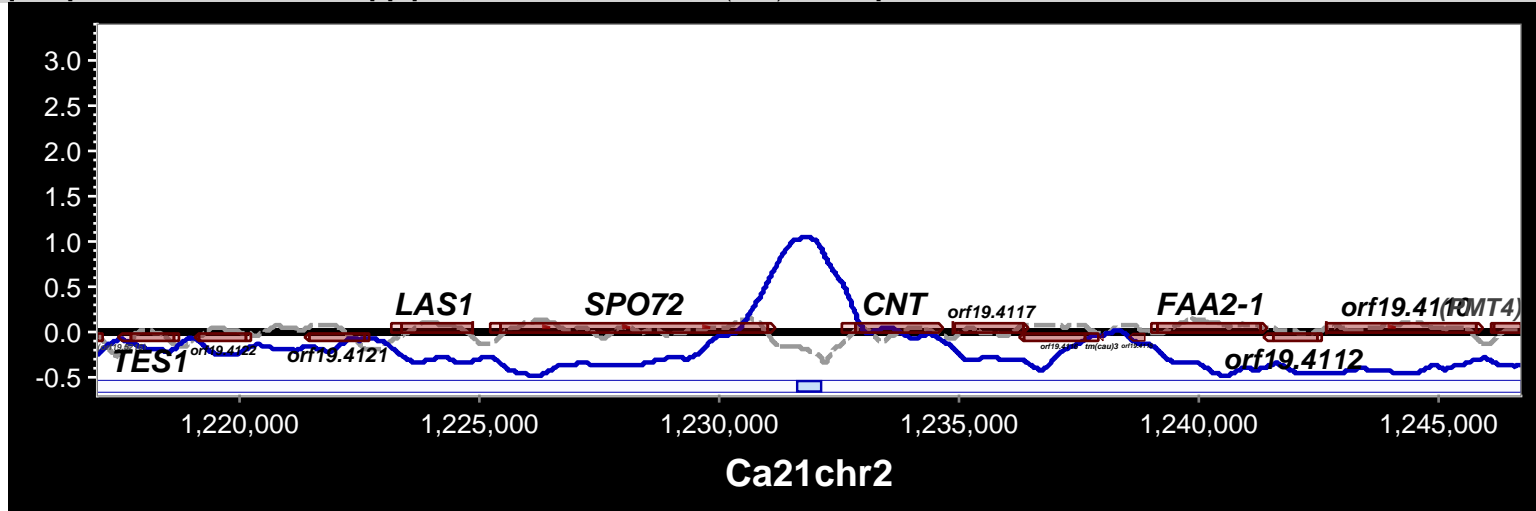

[1.042] Ca21chr4:1439902-1469585 [+] [MNN4, XUT1, CSO99, CDC68, IFF5]

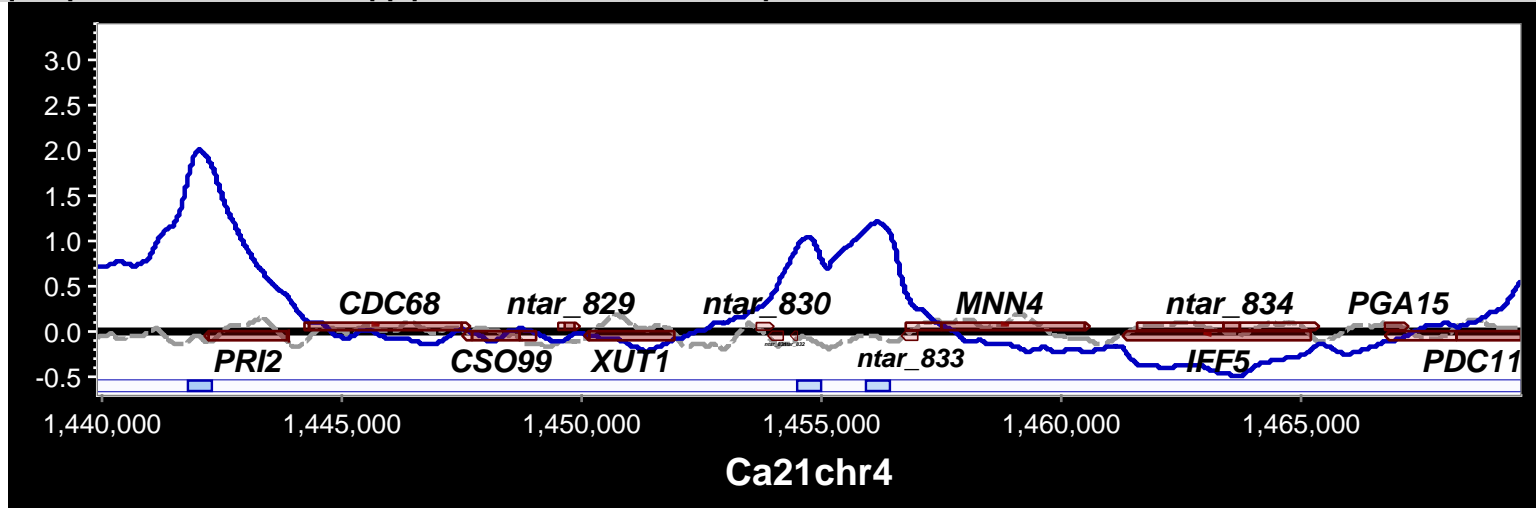

[1.038] Ca21chr2:1349222-1378905 [+] [FRP3, orf19.1225, DBF2, orf19.81, orf19.1296]

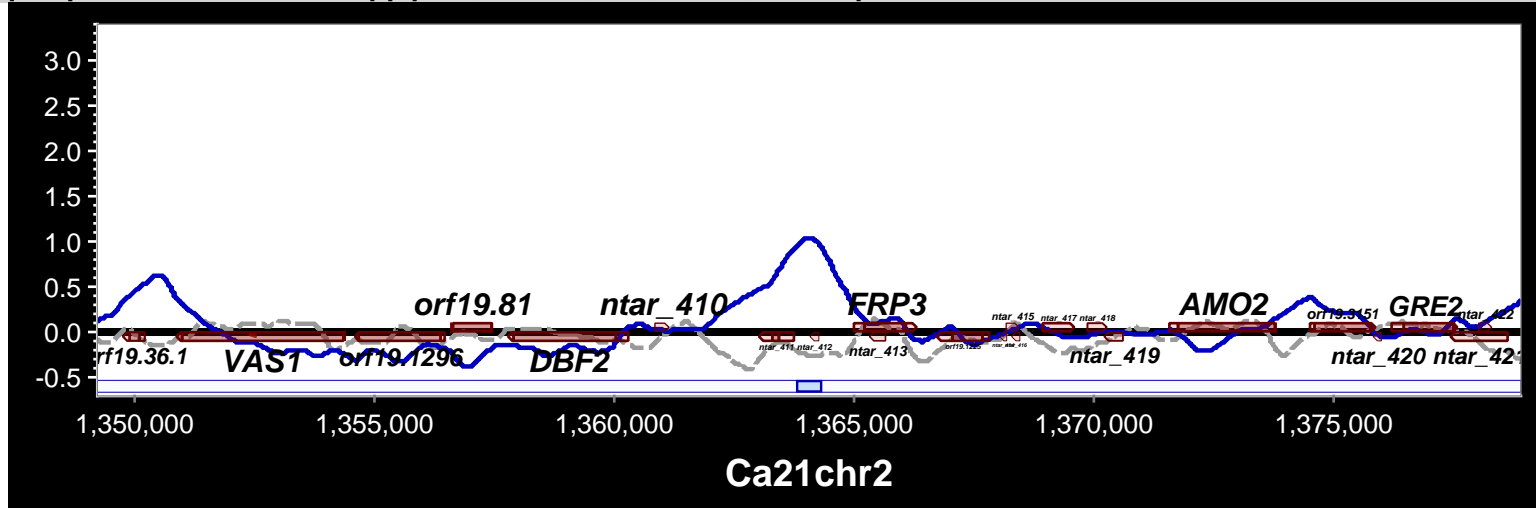

[1.035] Ca21chr6:567527-597210 [+] [orf19.5556, MNN4-4, orf19.5555, RBF1, orf19.5553]

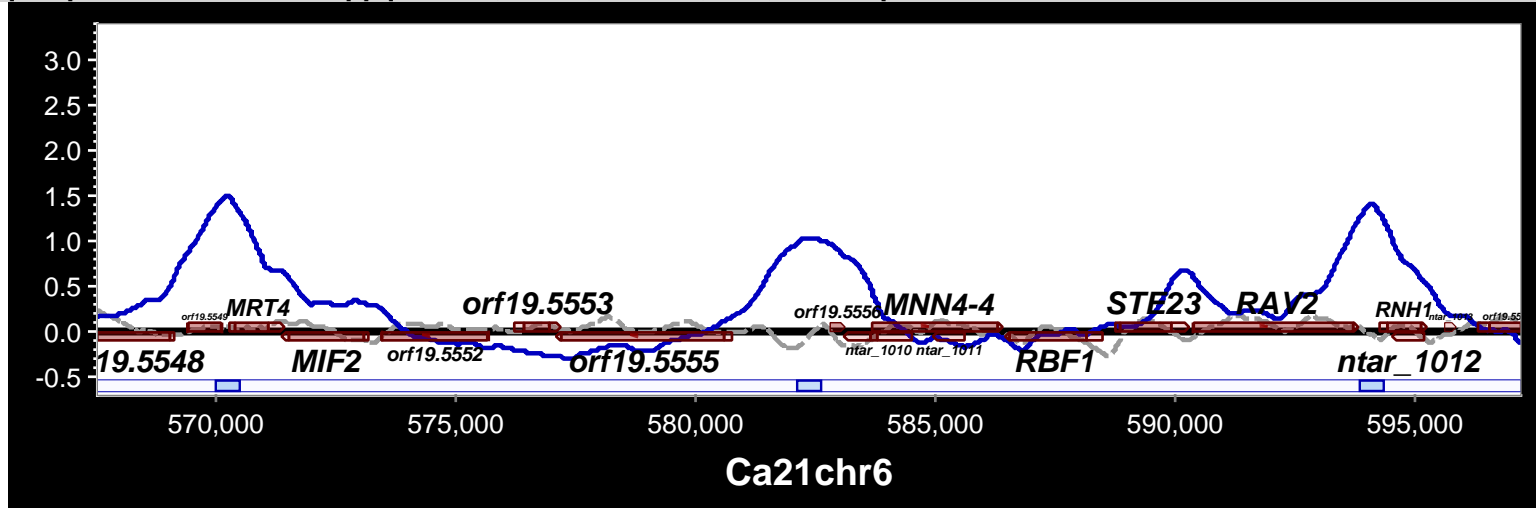

[1.031] Ca21chr7:431662-461345 [+] [CUP9, HSP90, RAD14, orf19.6518, EXO70]

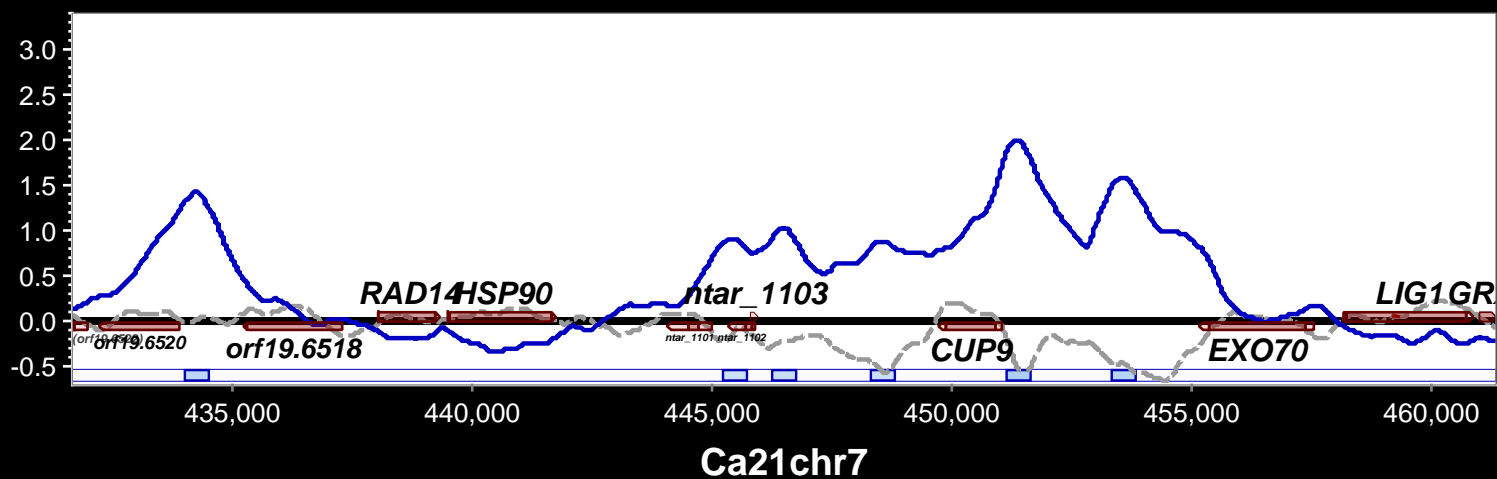

[1.029] Ca21chrR:462775-492458 [+] [PHO113, MET2, SEF1, UGT51C1, RAD51]

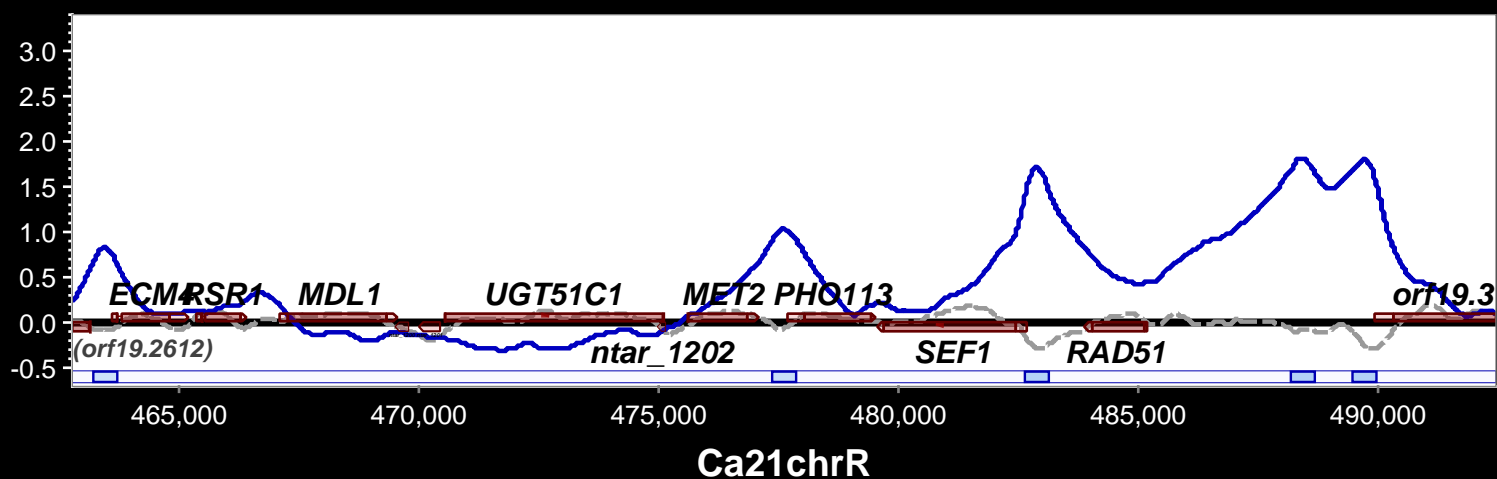

[1.02] Ca21chr1:2545188-2574871 [+] [orf19.1150.1, orf19.1150, orf19.1152, MRF1, GAD1]

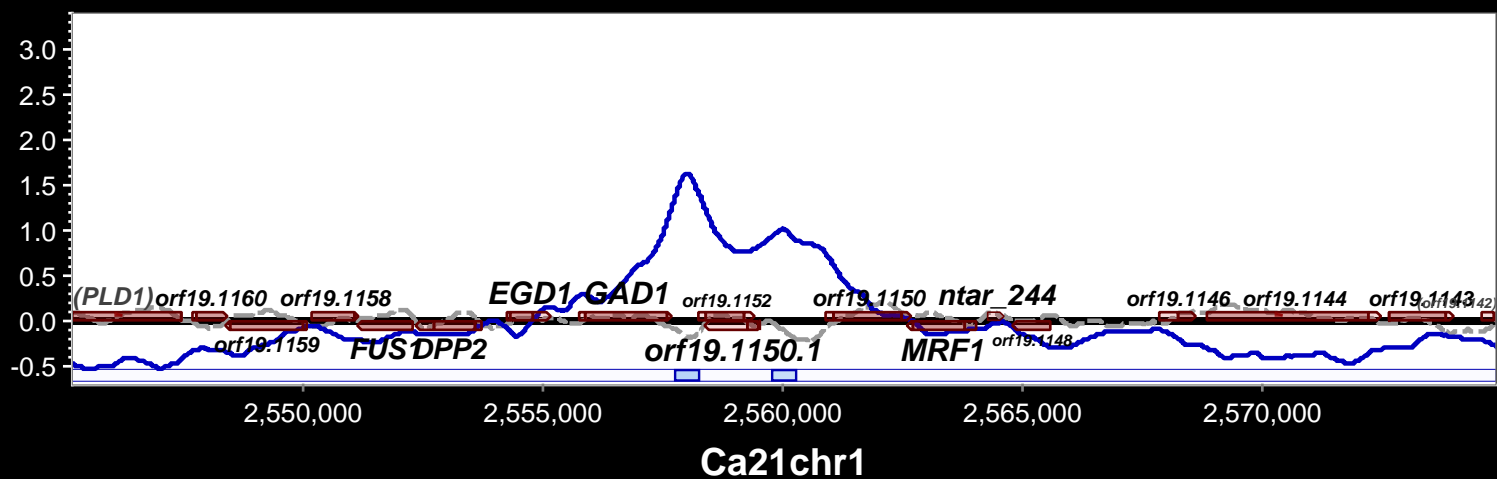

[1.02] Ca21chr3:1552688-1582371 [+] [FCR1, orf19.6816, tW(CCA)2, orf19.6818, TDH3]

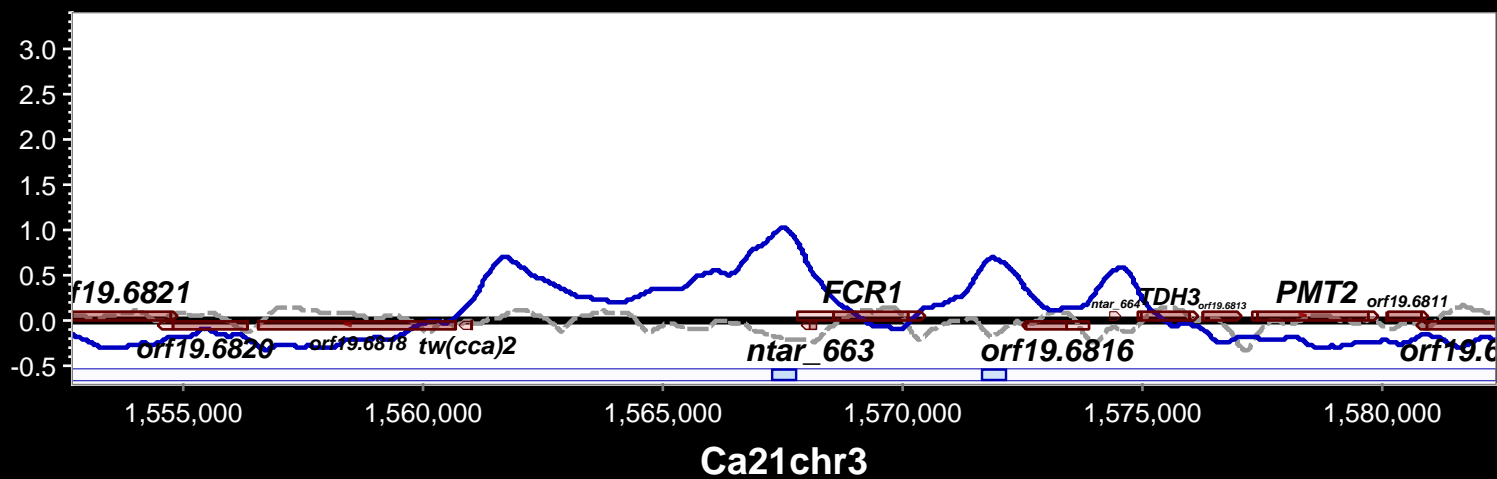

[1.017] Ca21chrR:1296268-1325951 [+] [RPL7, orf19.3868, orf19.3869, RFX1, orf19.3863]

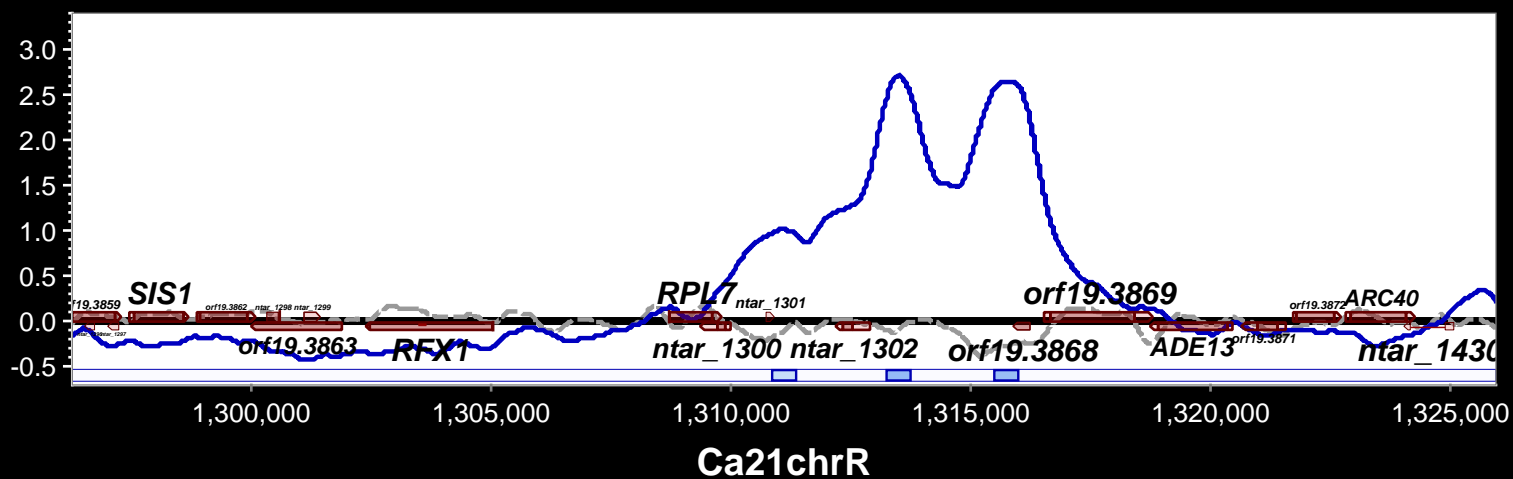

[1.016] Ca21chr4:924792-954475 [+] [orf19.1409.3, orf19.1409.1, orf19.1409.2, VAC7, LYS4]

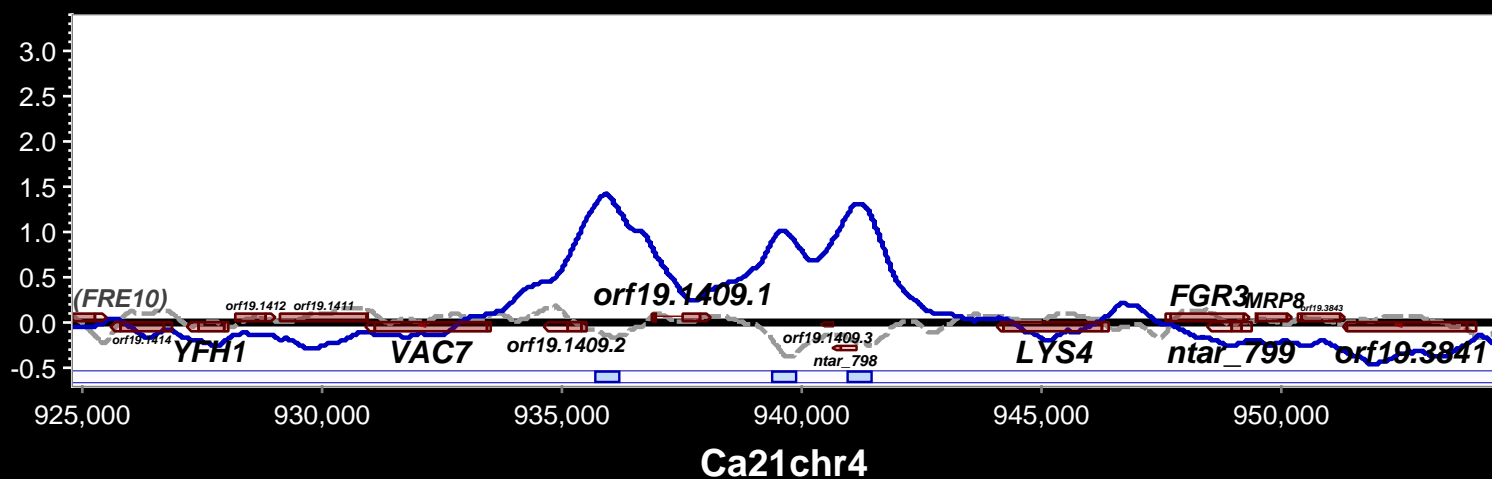

[1.012] Ca21chr1:805026-834709 [+] [orf19.4461, orf19.4463, orf19.4459, SEN15, orf19.4465]

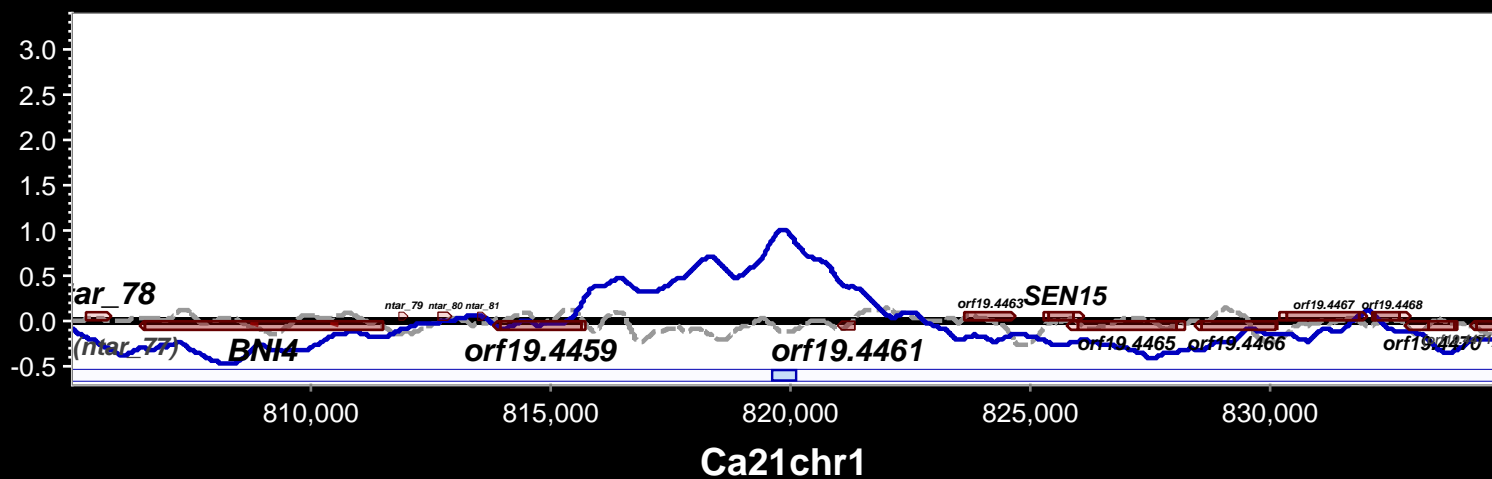

[1.011] Ca21chr4:692269-721952 [+] [VTC4, orf19.3364, DAO2, orf19.3362, CSH3]

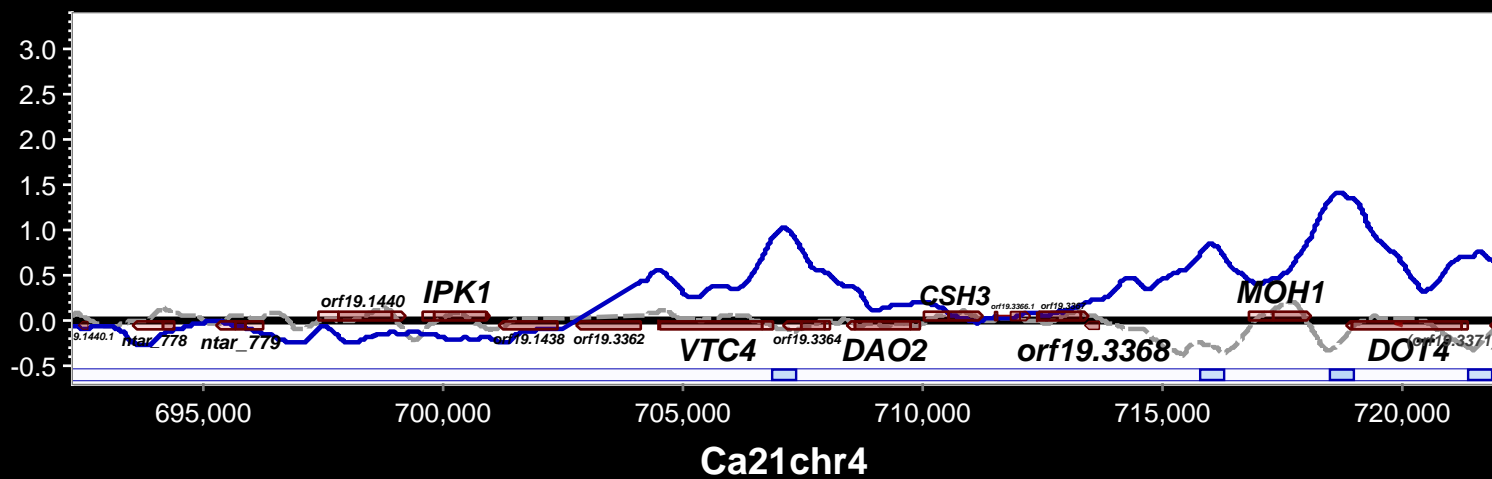



[1.006] Ca21chr1:1768554-1798237 [+] [BUL1, orf19.5093, orf19.5092, orf19.5090, TERT]

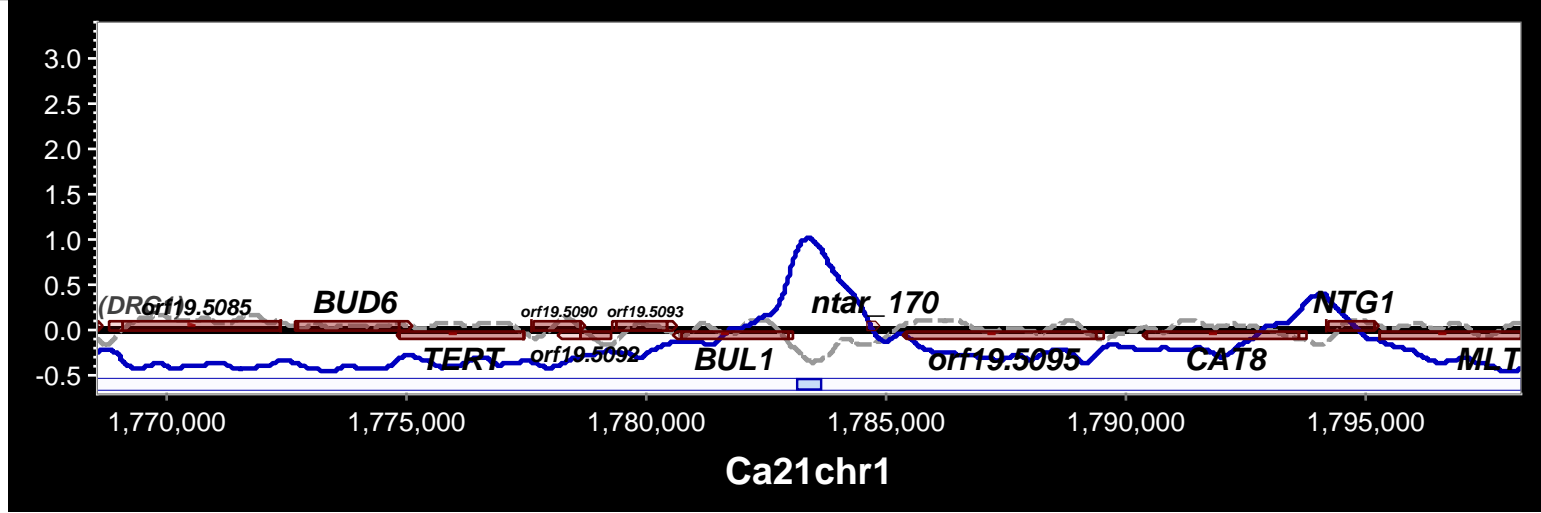

[1.005] Ca21chr5:909714-939397 [+] [orf19.3897, orf19.3898, SDC1, CHT2, orf19.3900]

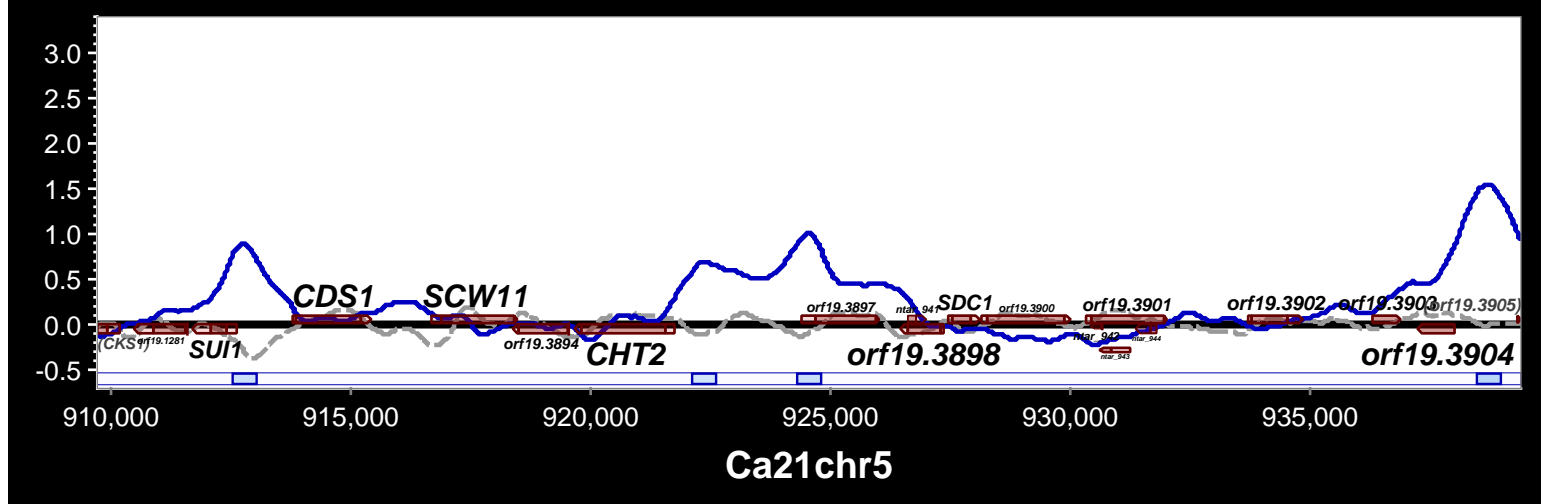

[1.004] Ca21chr7:92963-122646 [+] [orf19.7056, orf19.7057, orf19.7054, orf19.7058, GAC1]

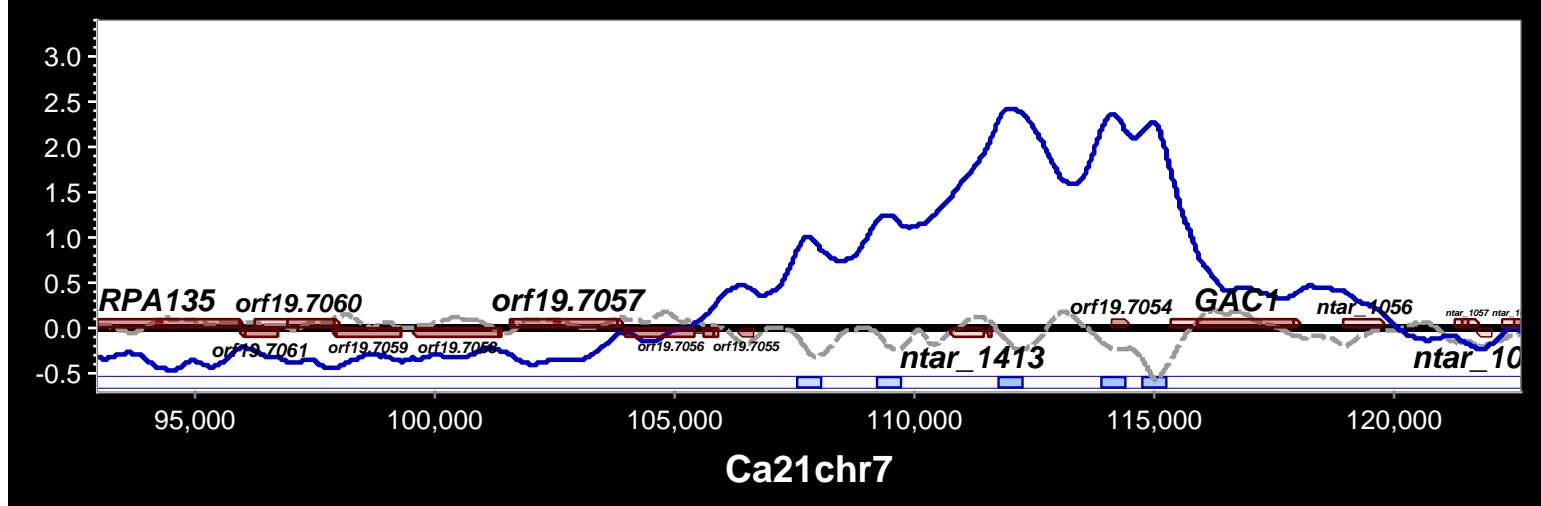

[1.003] Ca21chr1:7115-36798 [+] [orf19.6094, KEL1, TRP1, CCT8, orf19.6100]

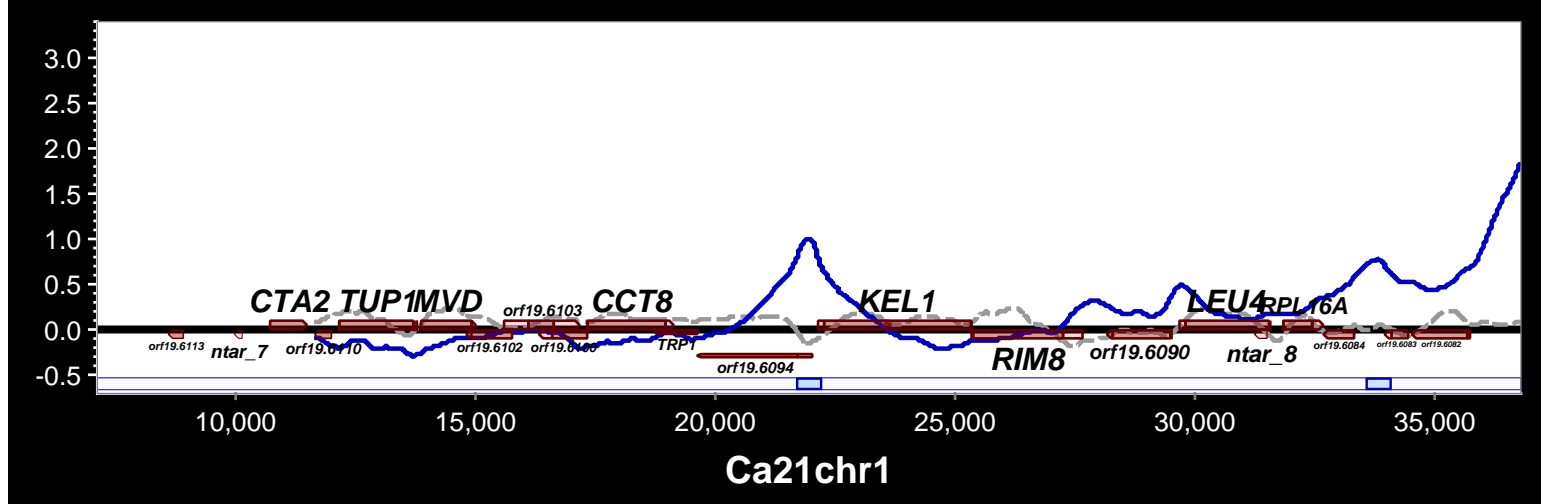

[1.003] Ca21chr1:417344-447027 [+] [orf19.3667, orf19.3666, orf19.3665, HGT2, HSP31]

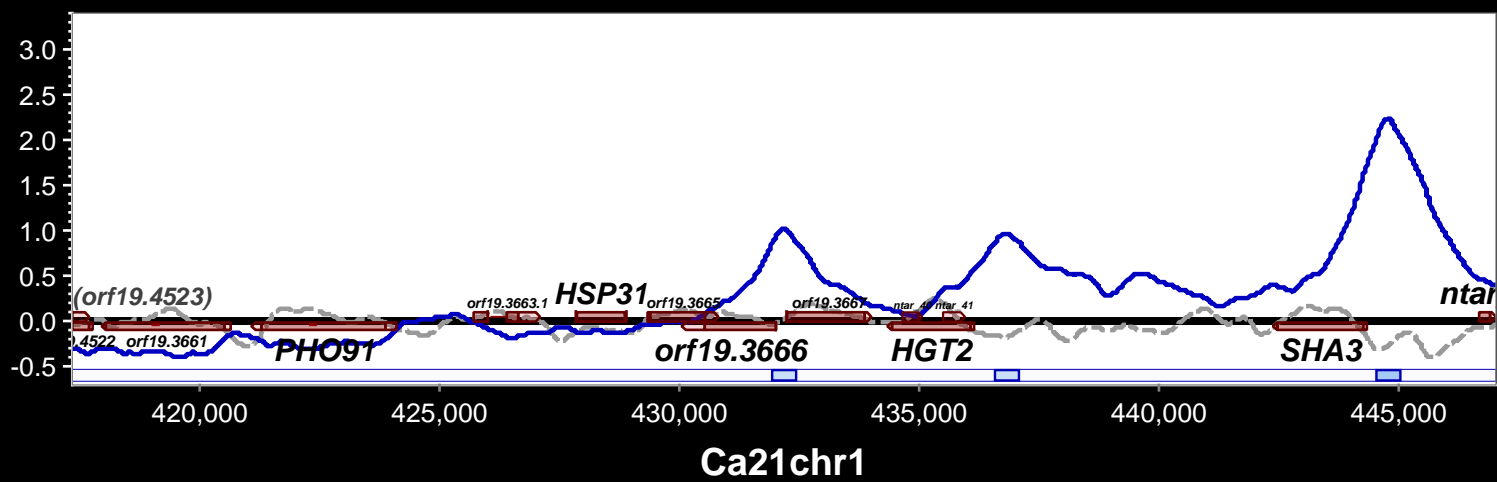

[1.002] Ca21chr6:968216-997899 [+] [orf19.2124, CEN6, orf19.2125, orf19.2127, orf19.2129]

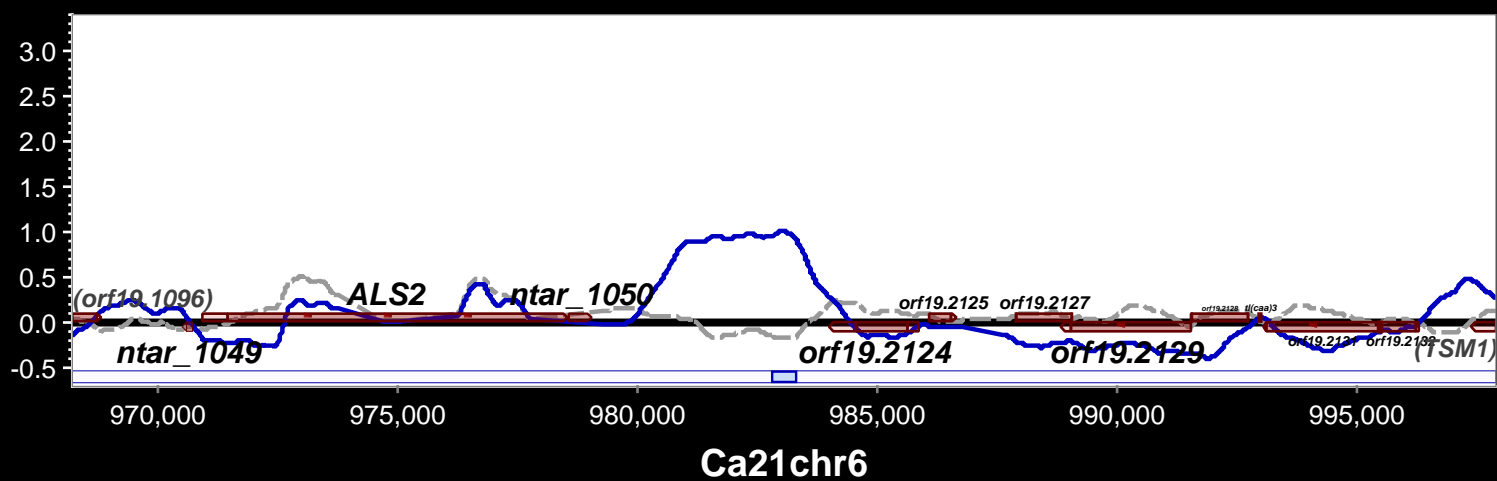

[1.001] Ca21chrR:832957-862640 [+] [orf19.4378, PRP13, KRE1, ULP2, orf19.4376]

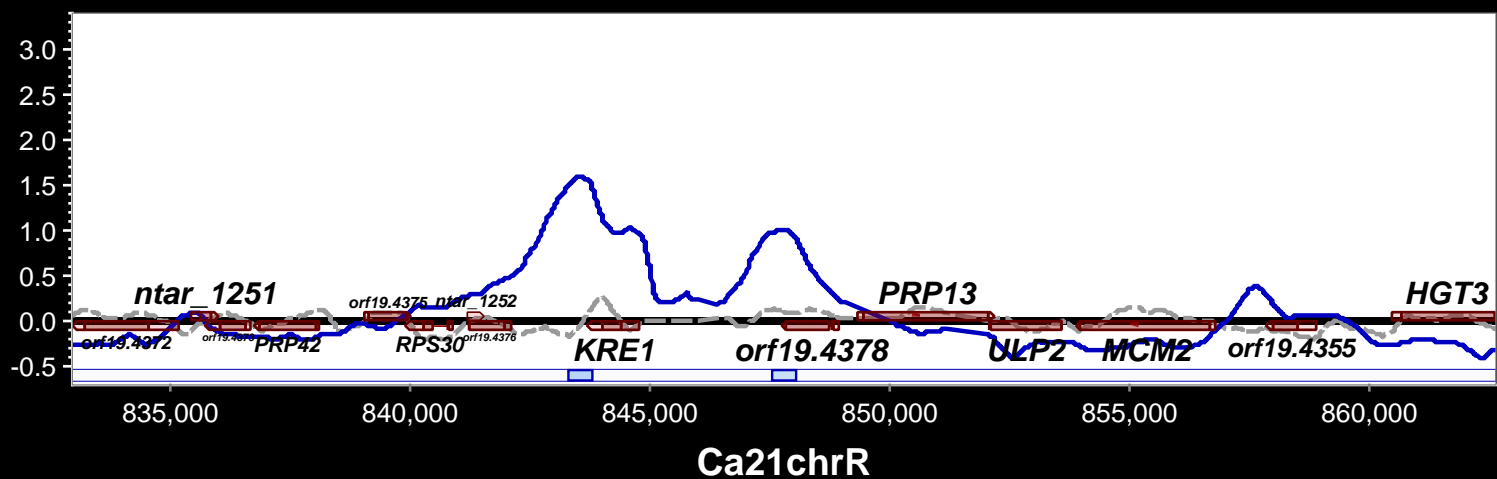

[1.0] Ca21chr1:2441913-2471596 [+] [orf19.2296, ARL3, orf19.2298, orf19.2299, orf19.2301]

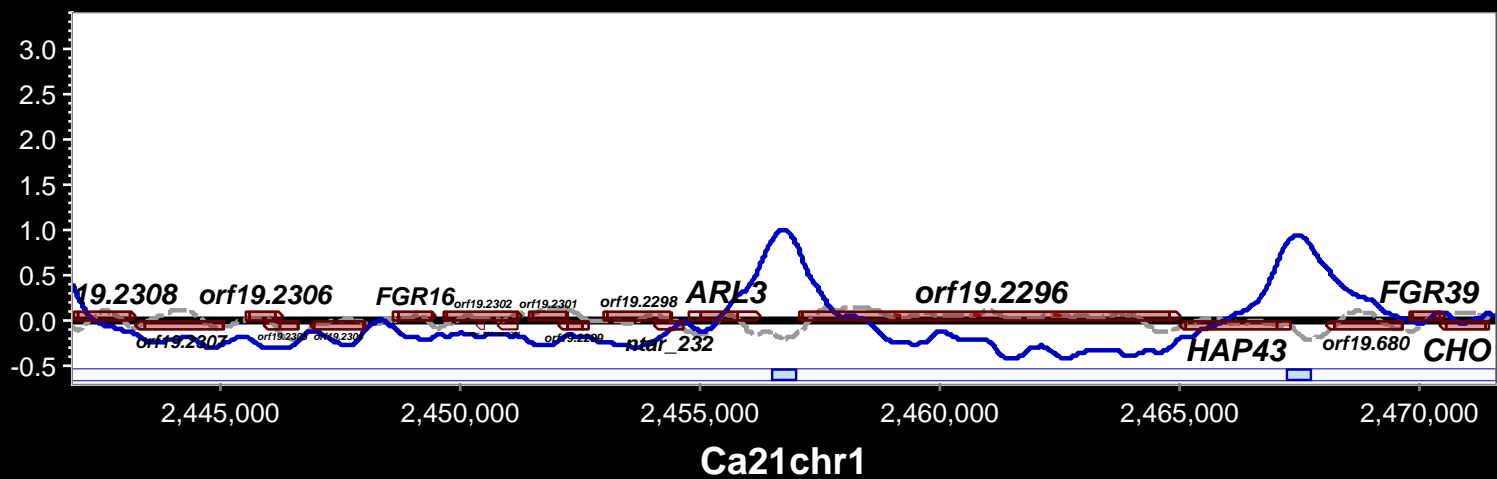

[0.998] Ca21chr7:754855-784538 [+] [orf19.6705, orf19.6704, GYP7, orf19.1330, orf19.6707]

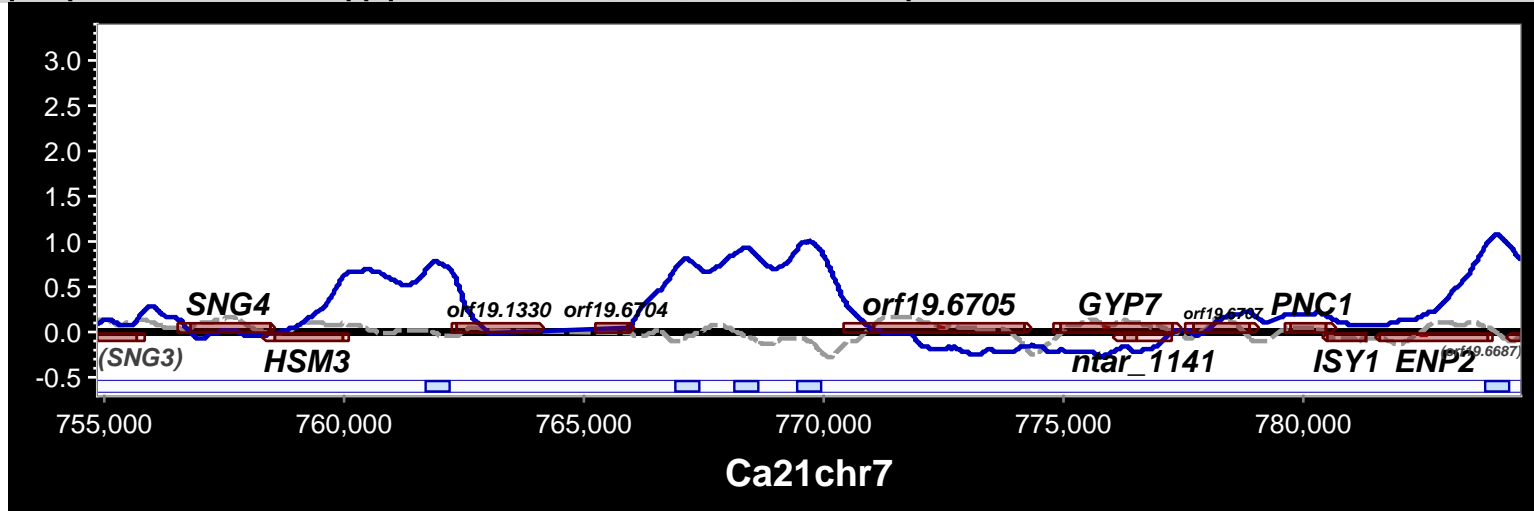

[0.997] Ca21chr2:839353-869036 [+] [DCK1, SSY1, SNRNAU2, orf19.813, DCK2]

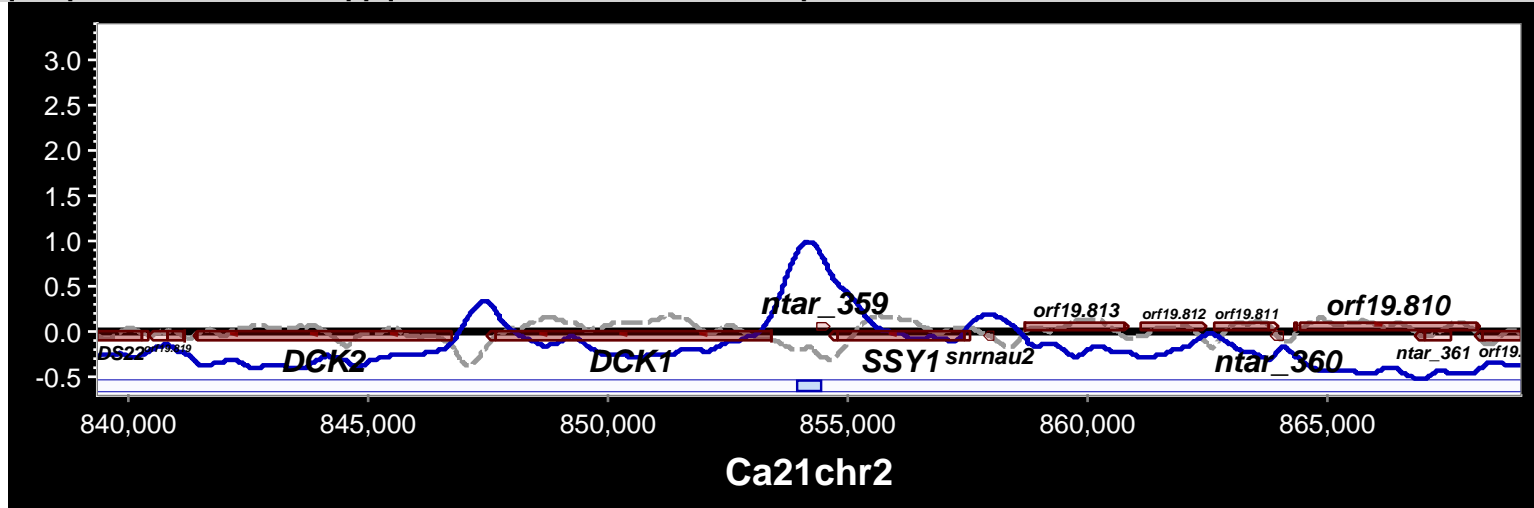

[0.994] Ca21chr2:333840-363523 [+] [CTF1, orf19.1497, orf19.1496, orf19.1495, orf19.1500]

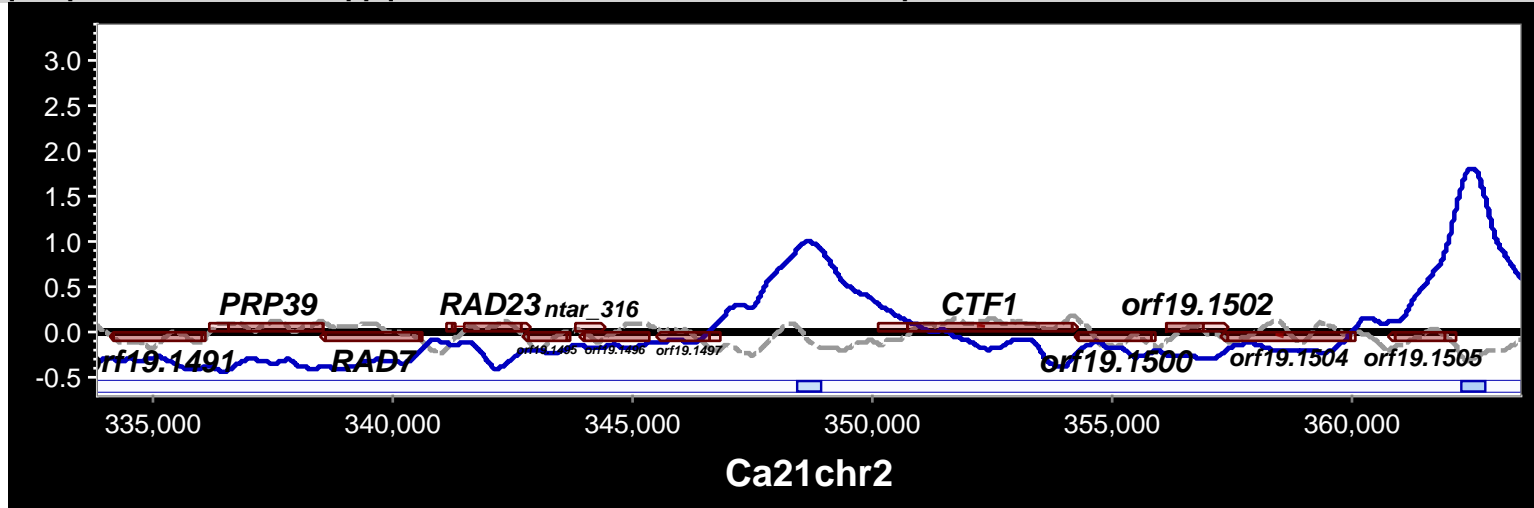

[0.992] Ca21chr3:116375-146058 [+] [PMA1, orf19.5381, orf19.5382, CHS8, LYS144]

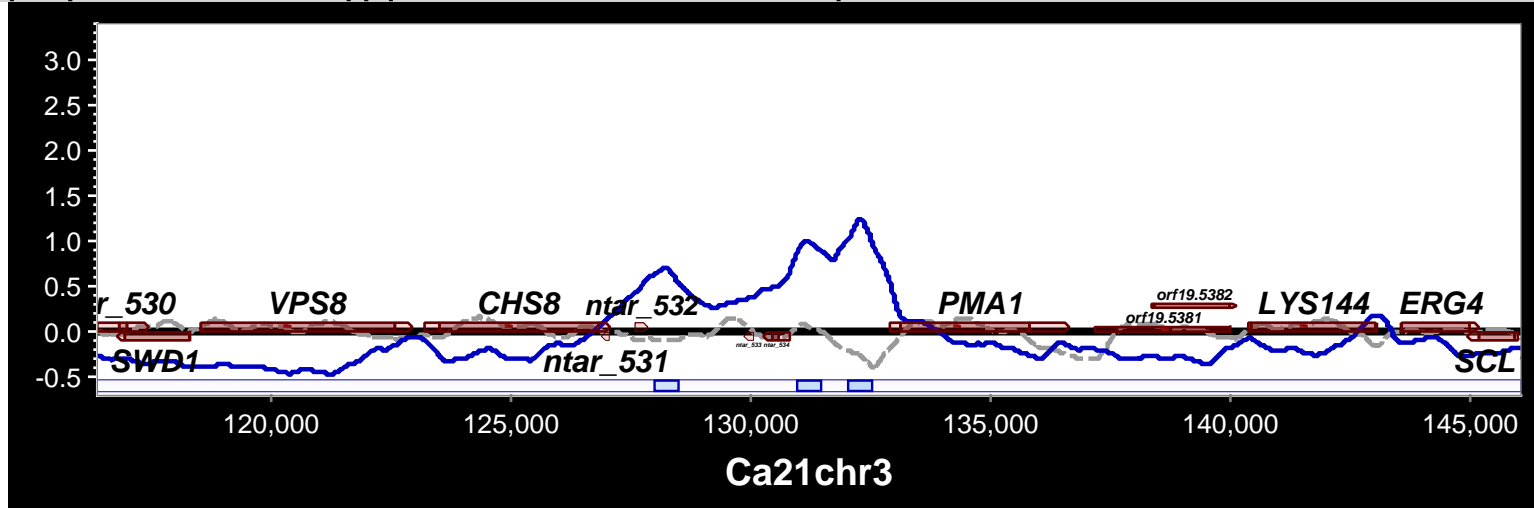

[0.992] Ca21chrR:577969-607652 [+] [orf19.2822, RFG1, orf19.2821, orf19.2820, orf19.2819]

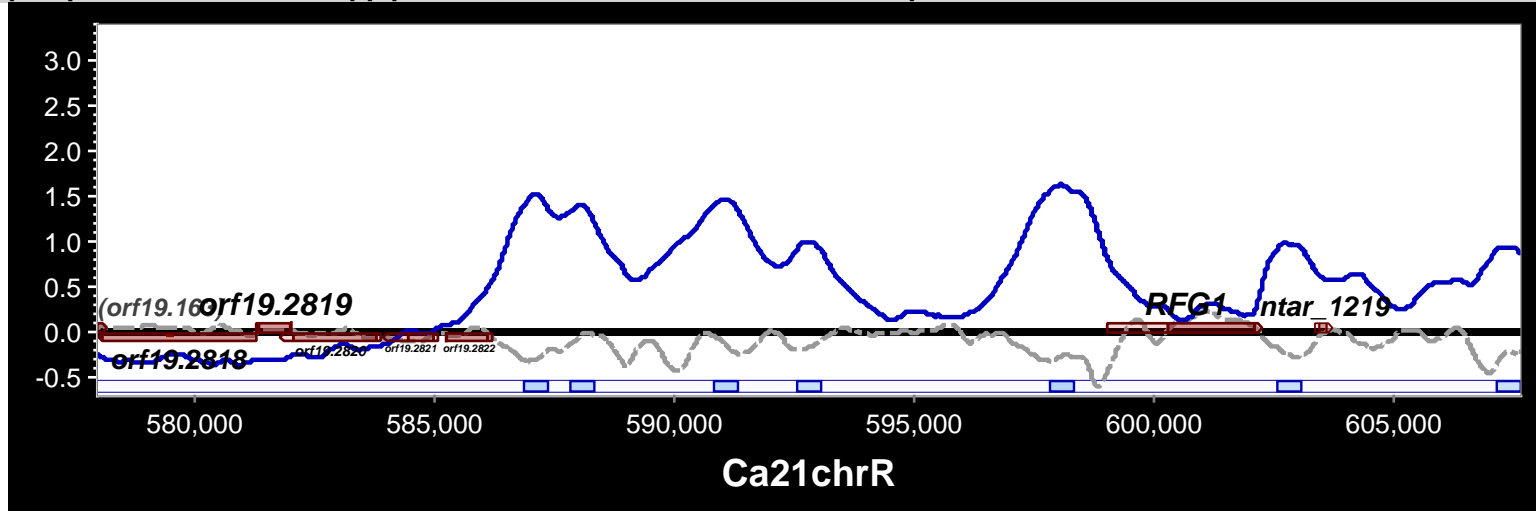

[0.989] Ca21chrR:751635-781318 [+] [orf19.4390, orf19.4388, orf19.4391, HXT5, orf19.2376]

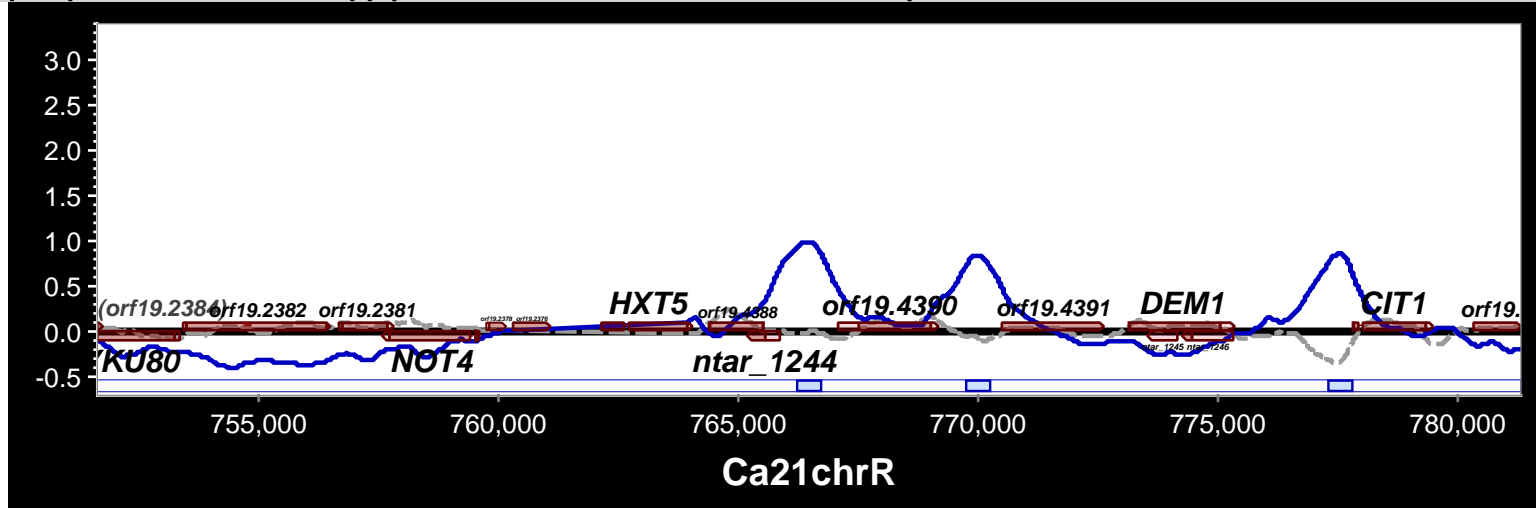

[0.982] Ca21chr1:1335313-1364996 [+] [orf19.6276, orf19.6275, orf19.6277, PBR1, orf19.6273]

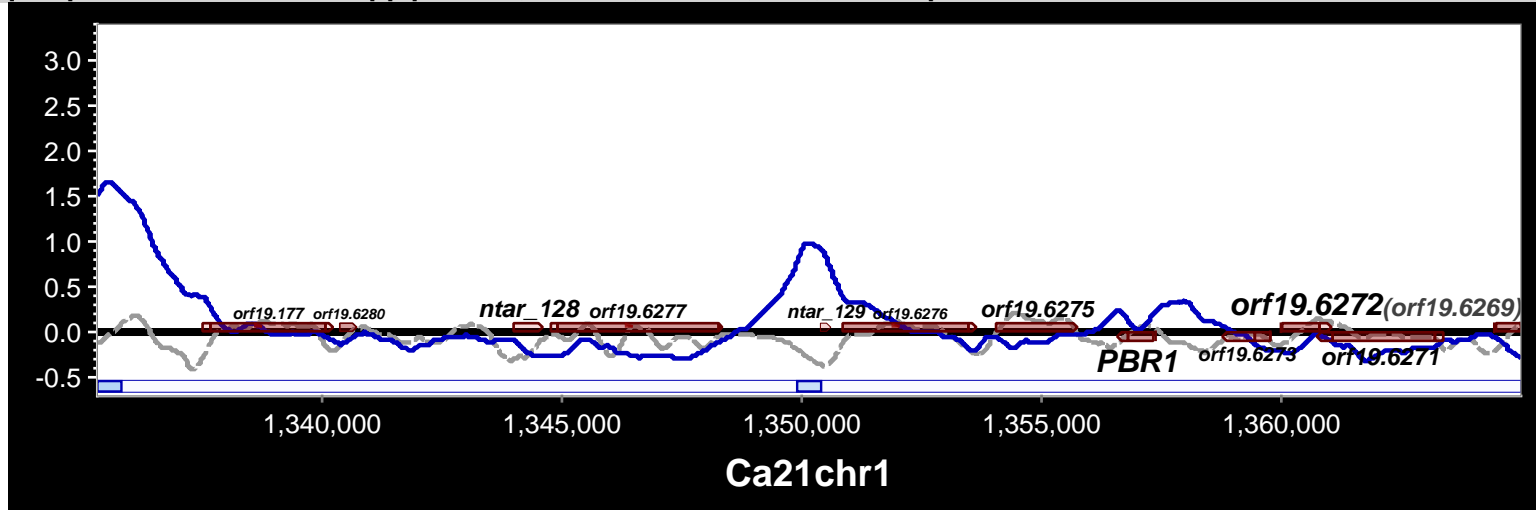

[0.982] Ca21chr2:1666136-1695819 [+] [orf19.1350, orf19.1351, orf19.1352, orf19.1349, orf19.1353]

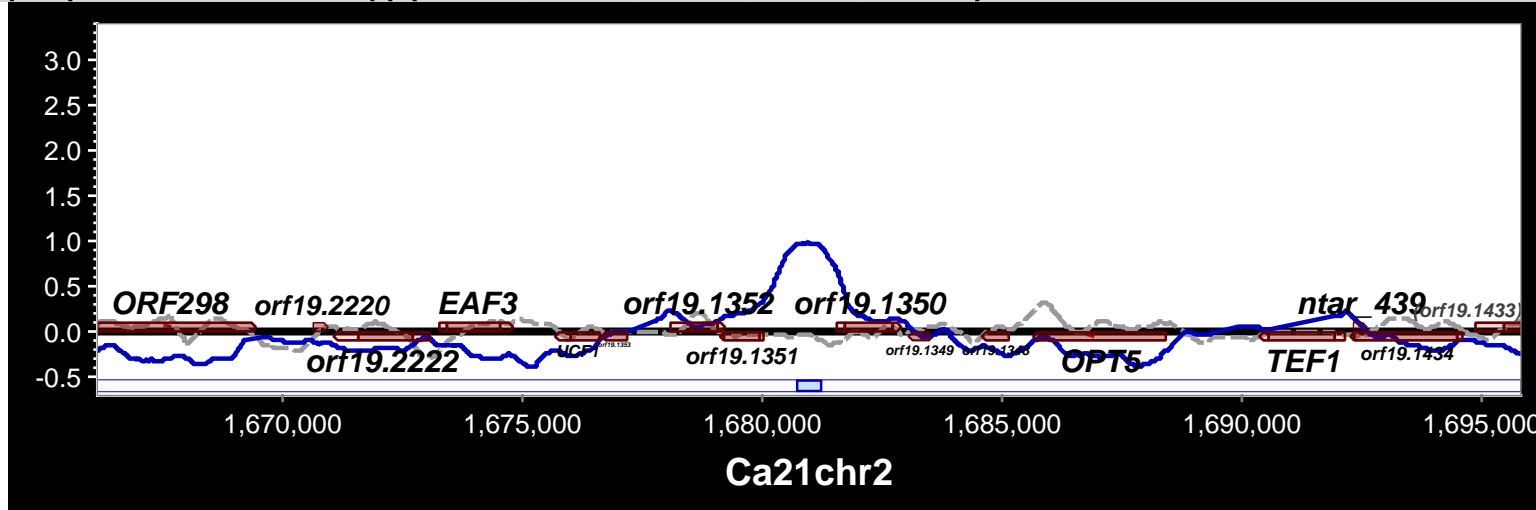

[0.979] Ca21chr1:582783-612466 [+] [PDE2, orf19.2973, orf19.2971, YKT6, YPT7]

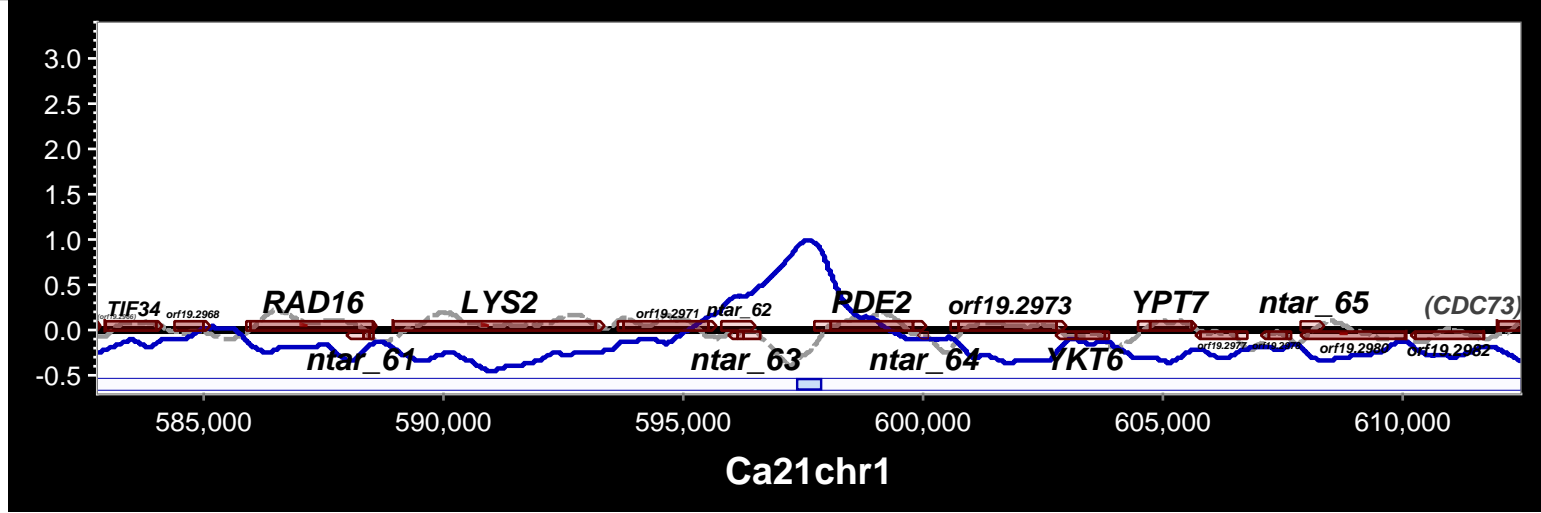

[0.979] Ca21chrR:587981-617664 [+] [RFG1, orf19.2825, orf19.2826, orf19.2827]

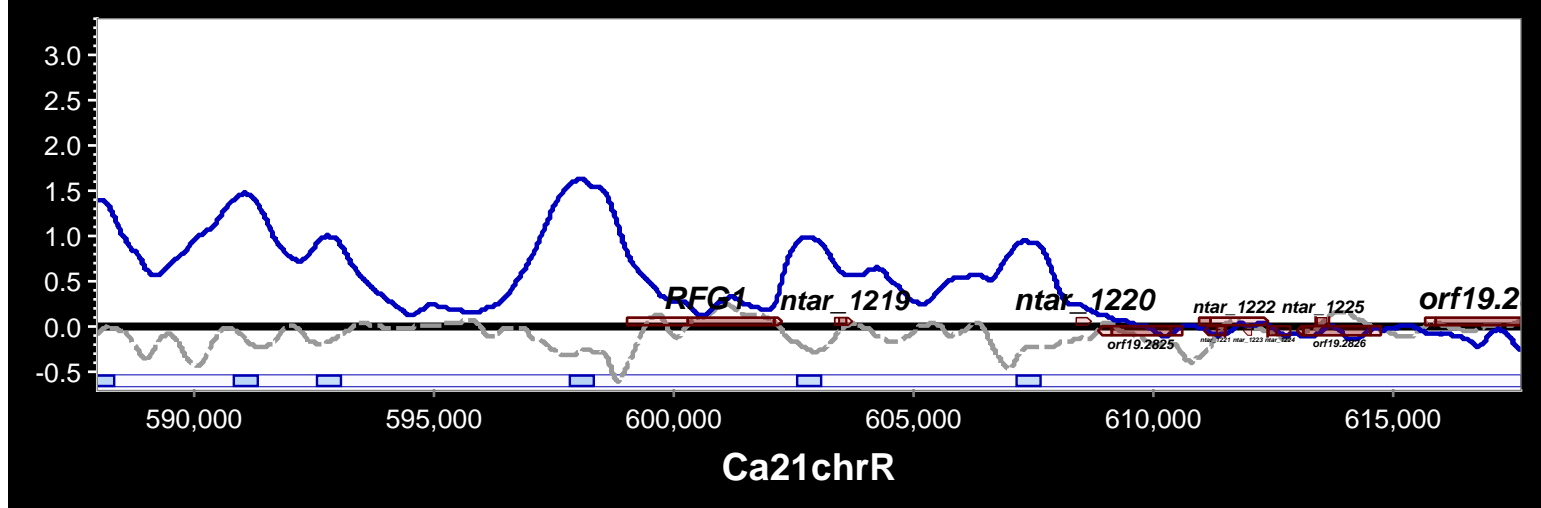

[0.975] Ca21chr3:1041048-1070731 [+] [orf19.5960, NOP14, orf19.5961, SNF3, CDR2]

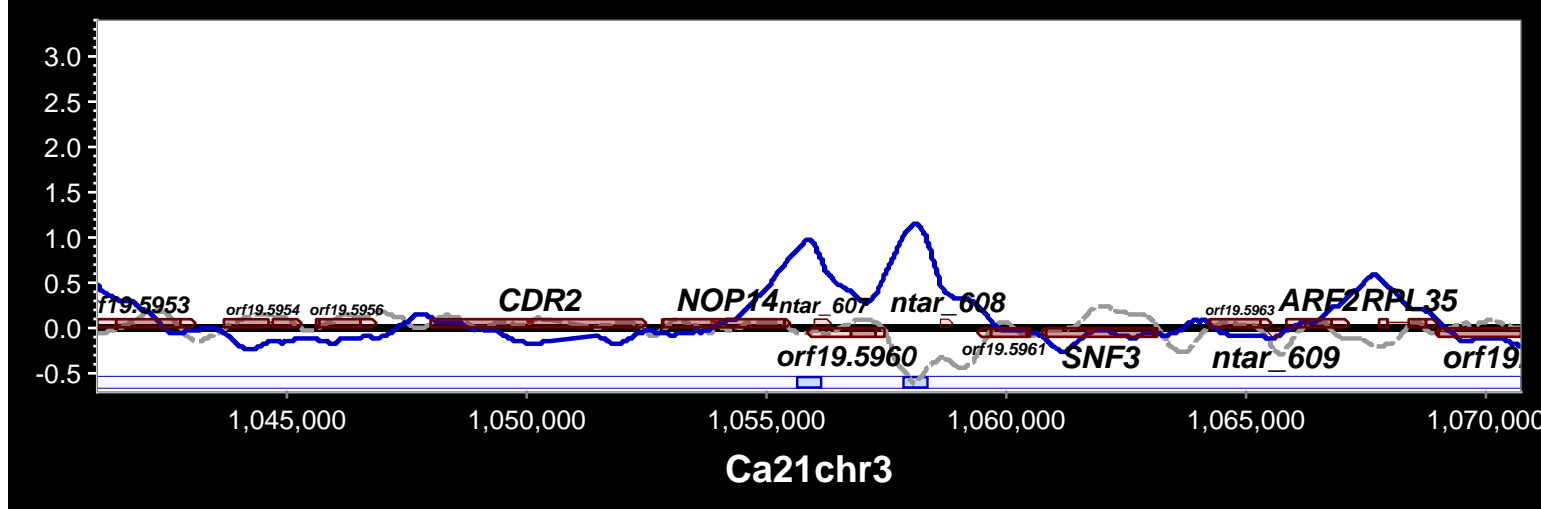

[0.974] Ca21chrR:284782-314465 [+] [orf19.3229, orf19.3228, BOI2, FTH2, orf19.3226]

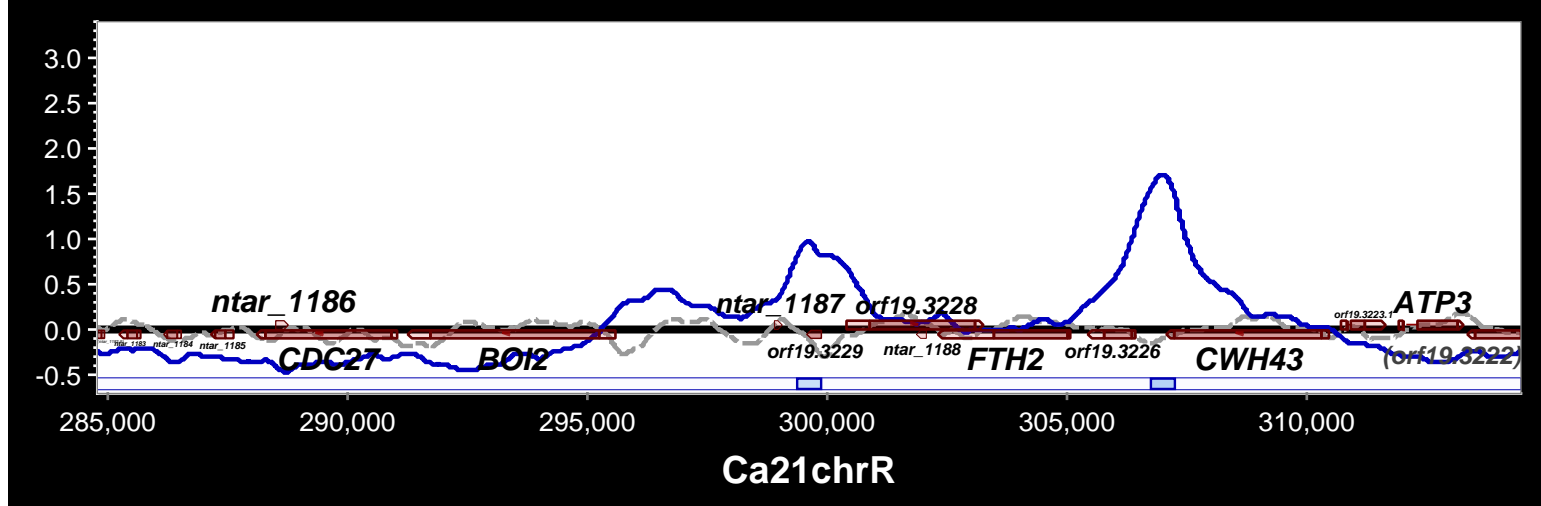

[0.973] Ca21chr4:958178-987861 [+] [orf19.3828, PHR1, orf19.3827, orf19.3831, orf19.3826]

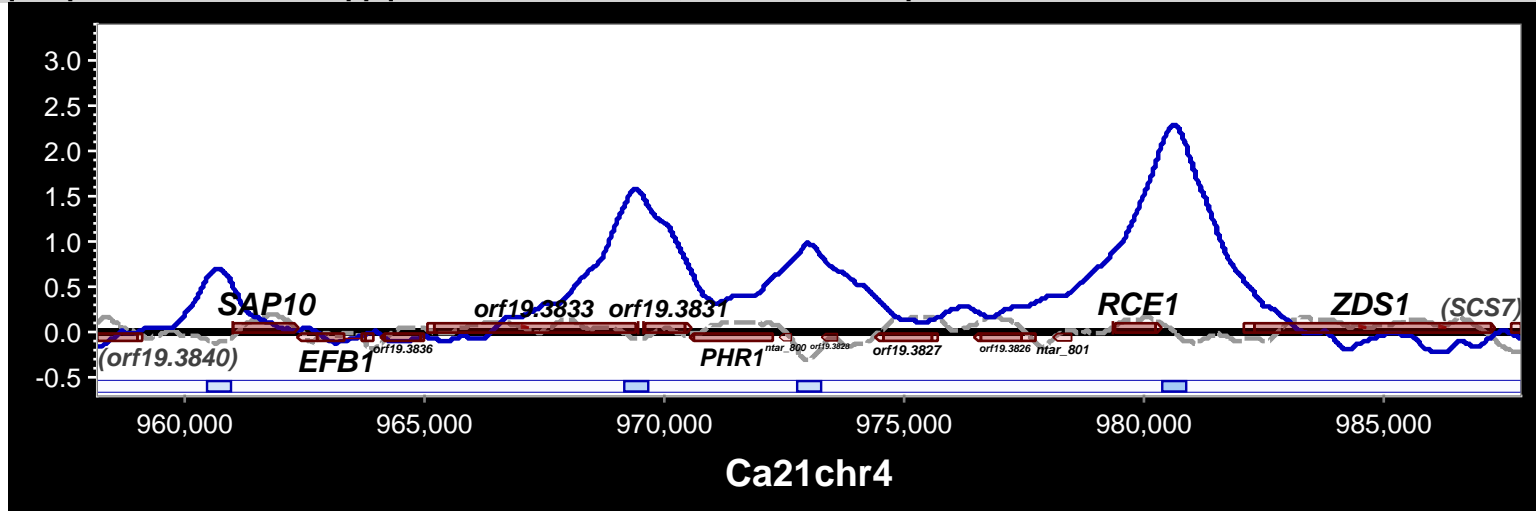

[0.973] Ca21chrR:429430-459113 [+] [OPT1, orf19.2604, orf19.2605, HEM1, HDA1]

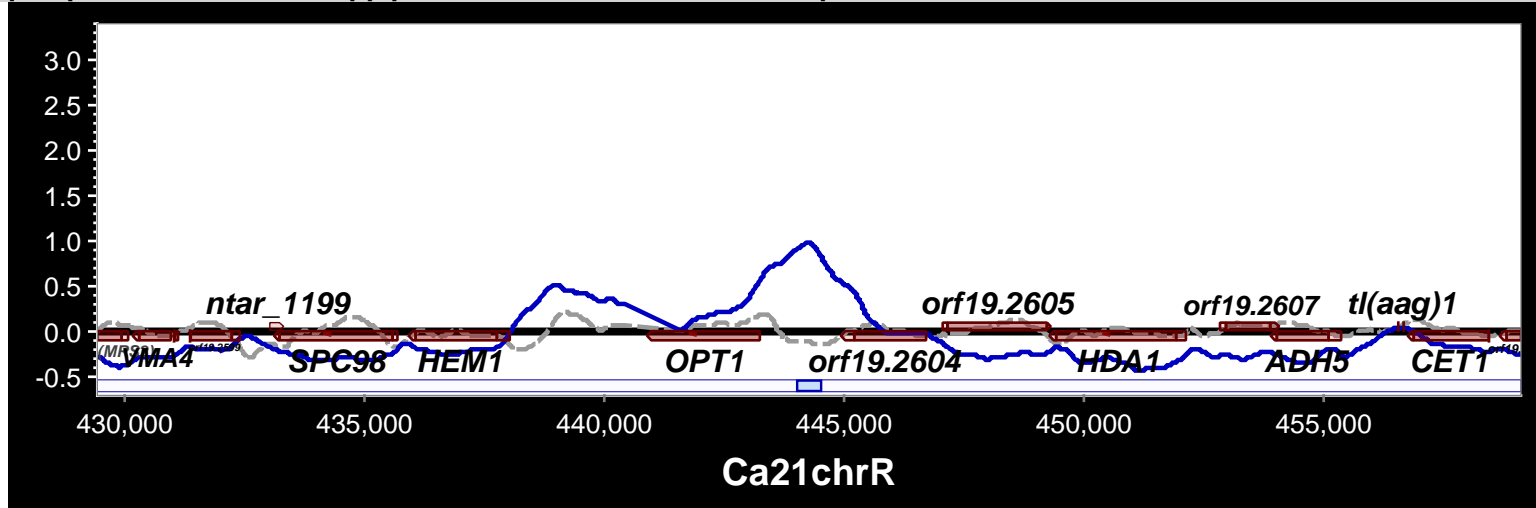

[0.969] Ca21chr1:421990-451673 [+] [HGT2, orf19.3667, orf19.3666, SHA3, orf19.3665]

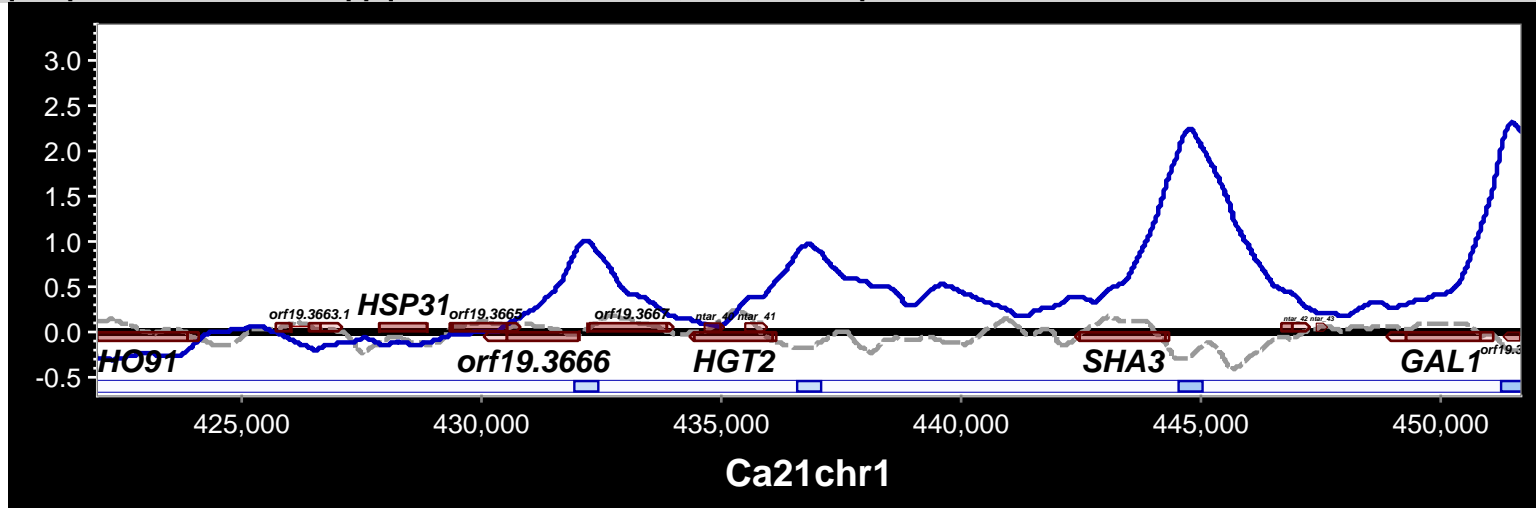

[0.969] Ca21chr3:1456443-1486126 [+] [th(GUG)3, GLG2, AAF1, orf19.7433, ECM15]

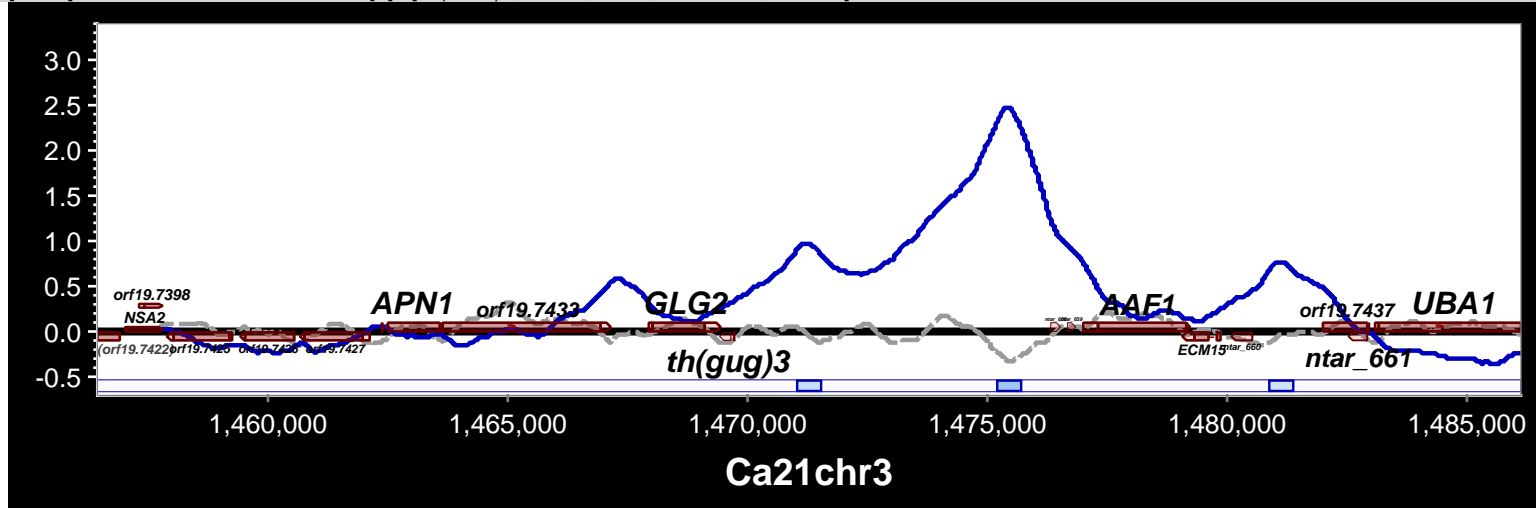

[0.968] Ca21chr3:969008-998691 [+] [orf19.5924, orf19.5921, orf19.5920, orf19.5925, MEA1]

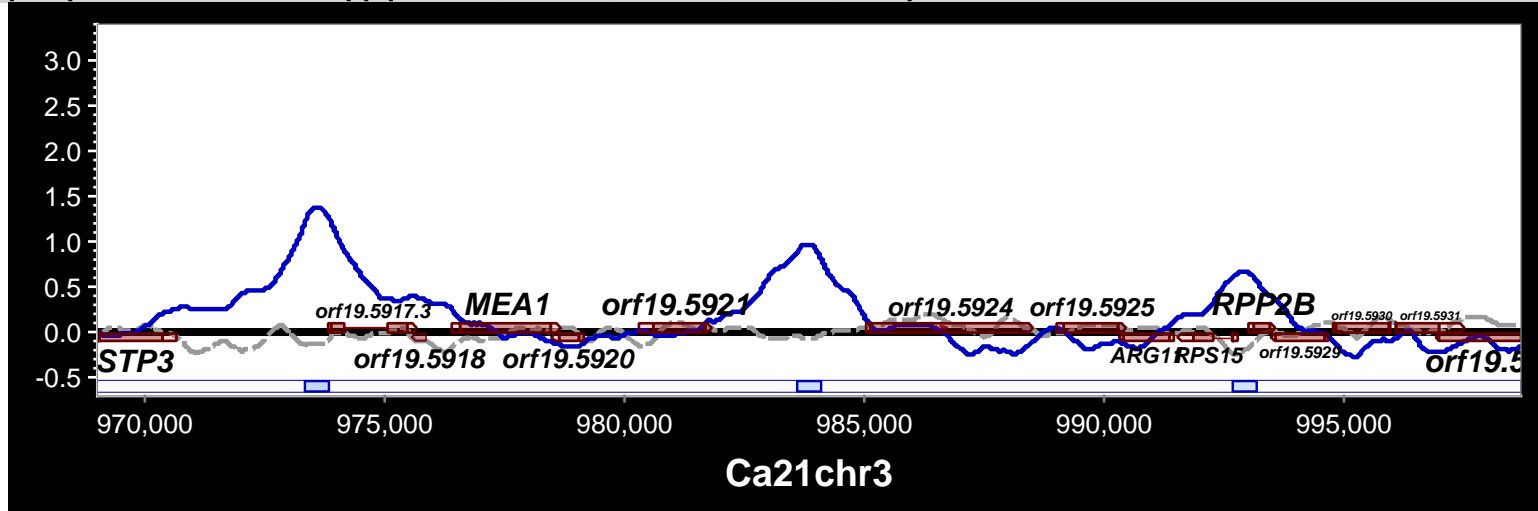

[0.967] Ca21chr3:1072185-1101868 [+] [orf19.5975, ATG9, orf19.5976, CEM1, orf19.5973]

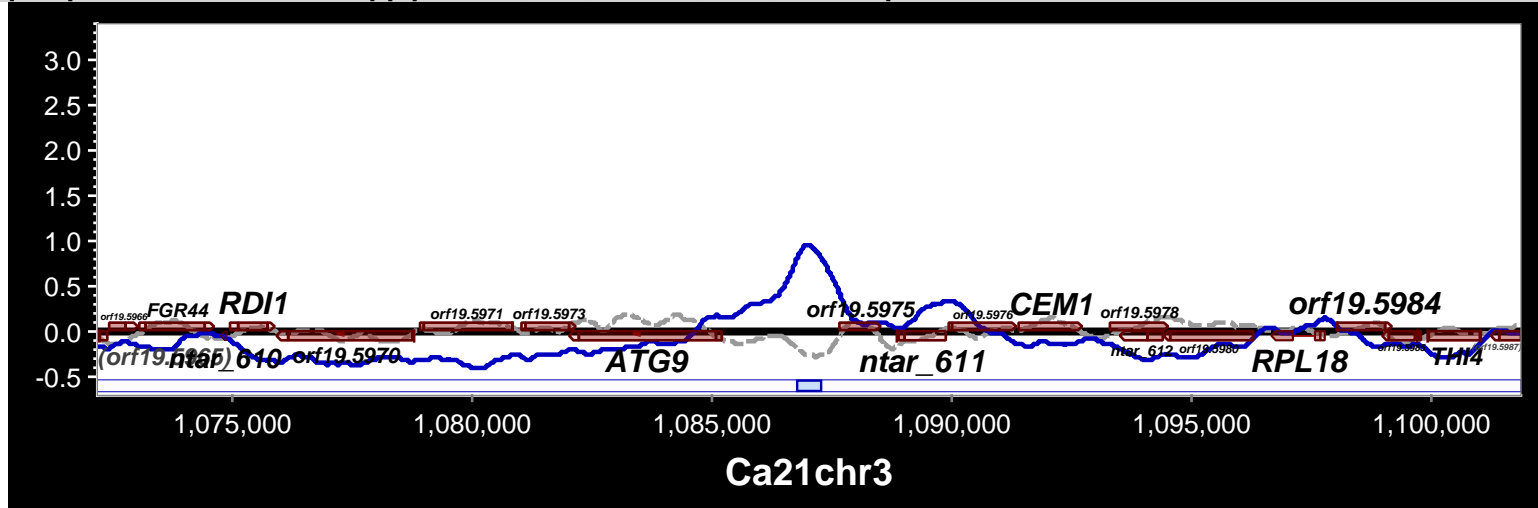

[0.967] Ca21chr5:774617-804300 [+] [orf19.6660, orf19.6661, orf19.6662, GAP6, RPS25B]

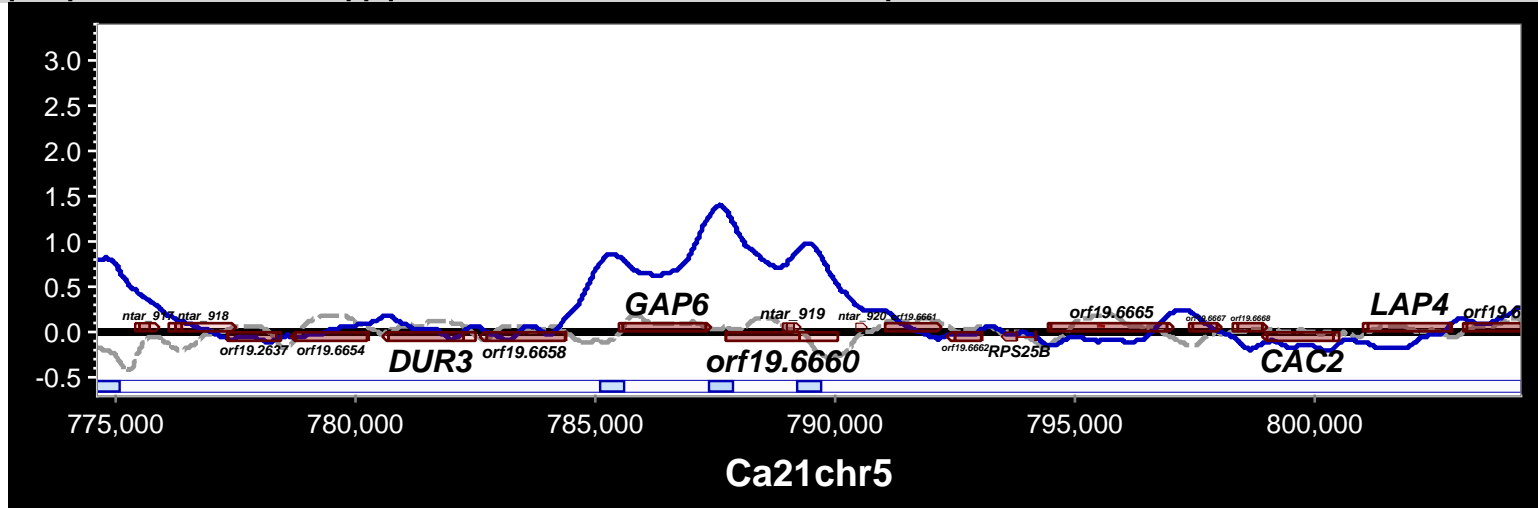

[0.965] Ca21chr5:85632-115315 [+] [orf19.938, orf19.936, NAM7, BUD2, AGA1]

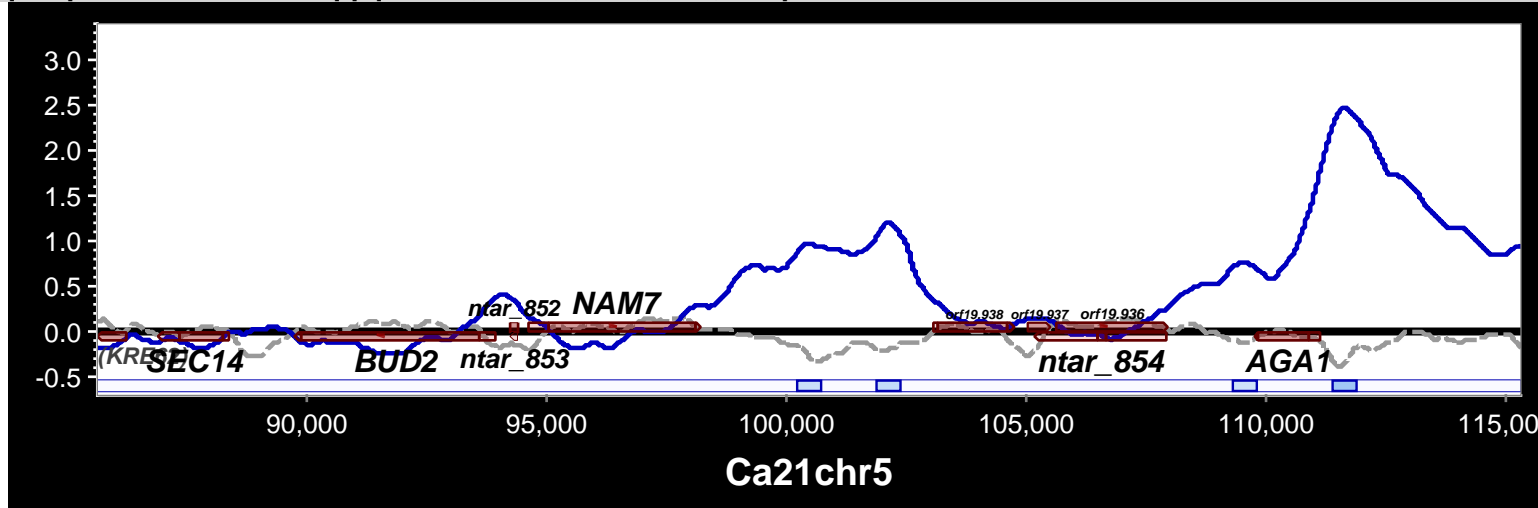

[0.963] Ca21chr1:132541-162224 [+] [orf19.6027, HGC1, ERG2, orf19.6025, orf19.6024]

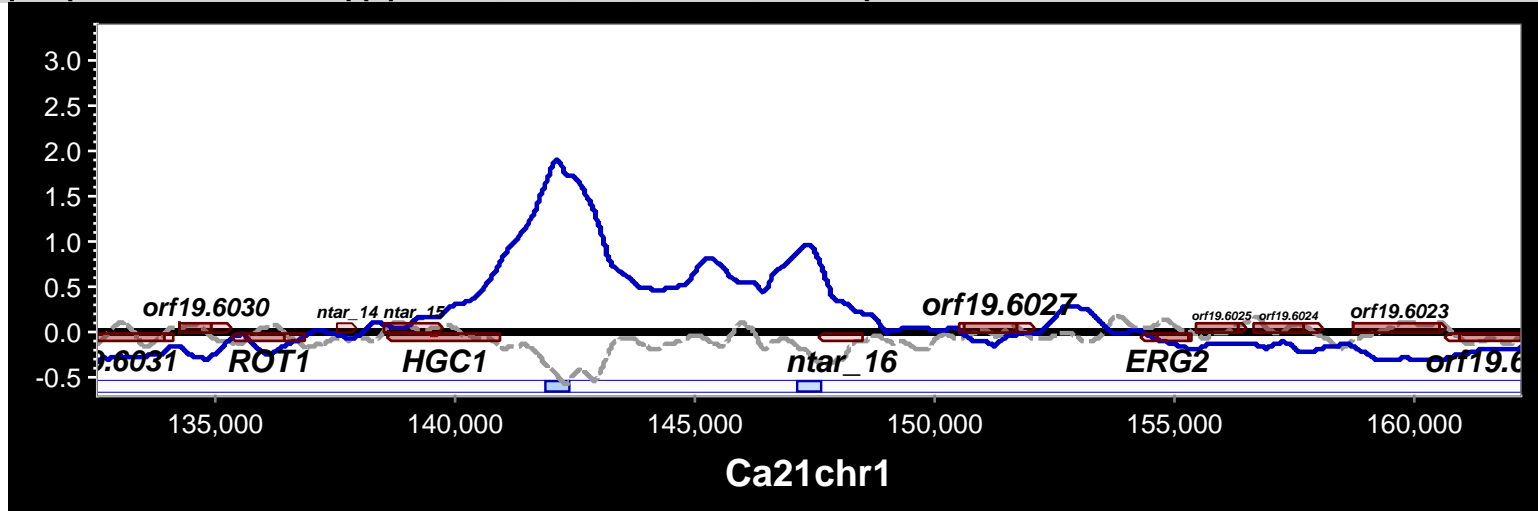

[0.958] Ca21chr1:1211143-1240826 [+] [orf19.2459, orf19.2460, PRN4, orf19.2458, PRN3]

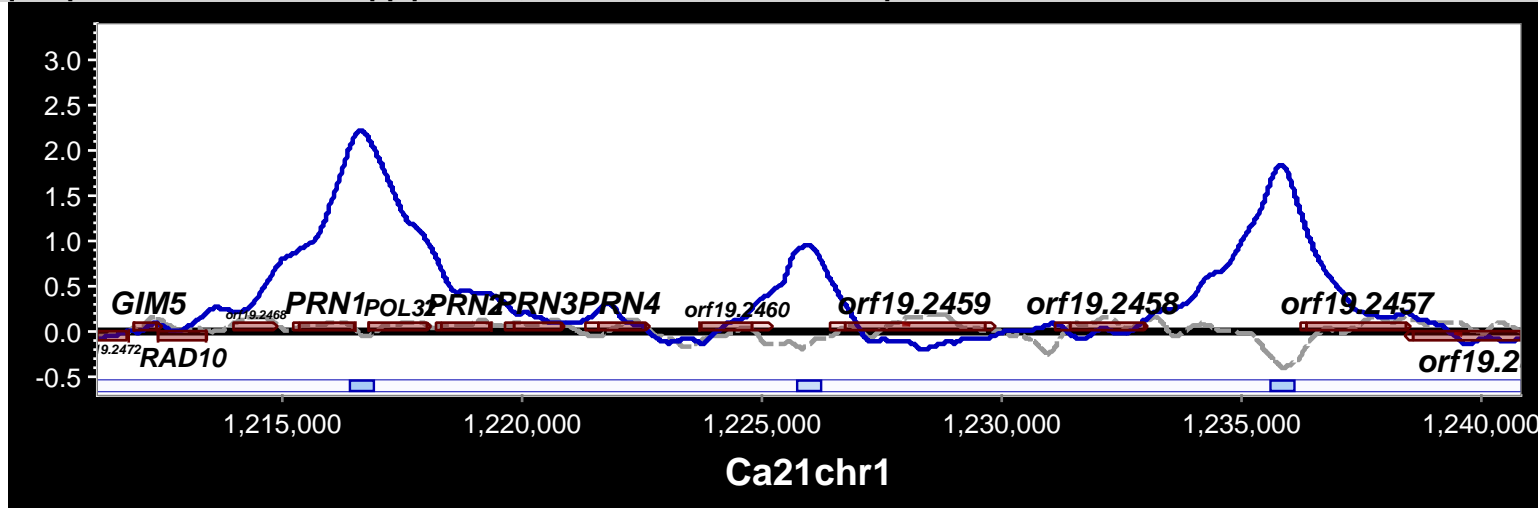

[0.958] Ca21chr3:1098251-1127934 [+] [orf19.5991, WOR2, orf19.5989, orf19.5987, THI4]

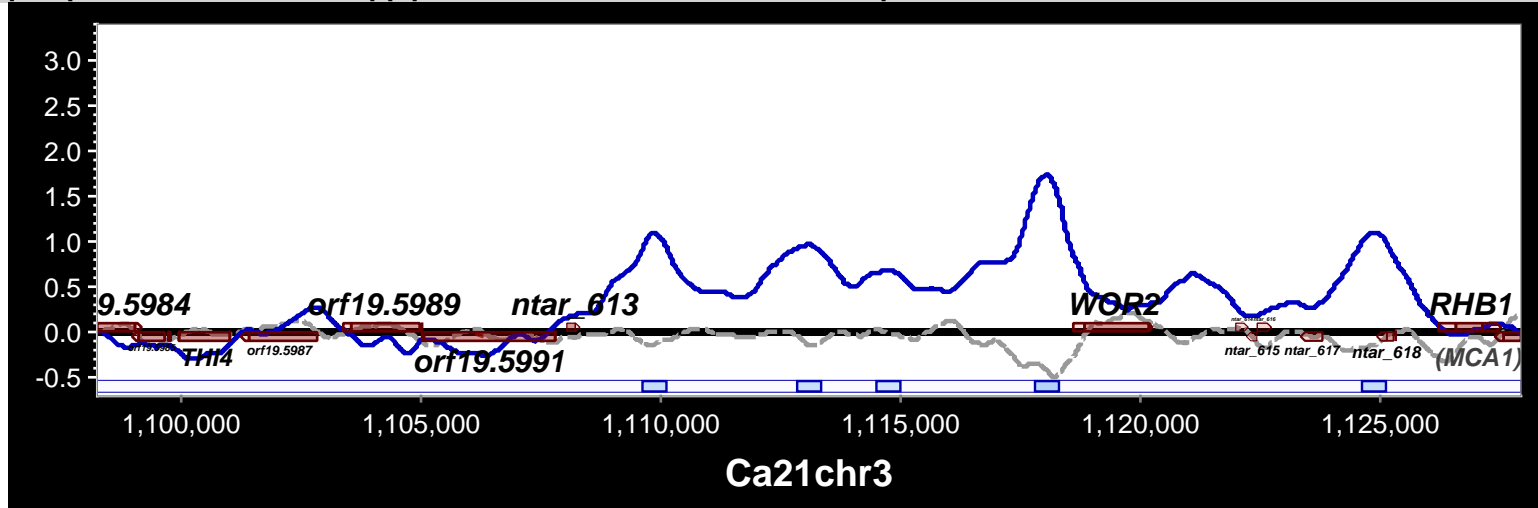

[0.957] Ca21chr4:263119-292802 [+] [PGA53, ILV6, orf19.4652, orf19.4653, orf19.4649]

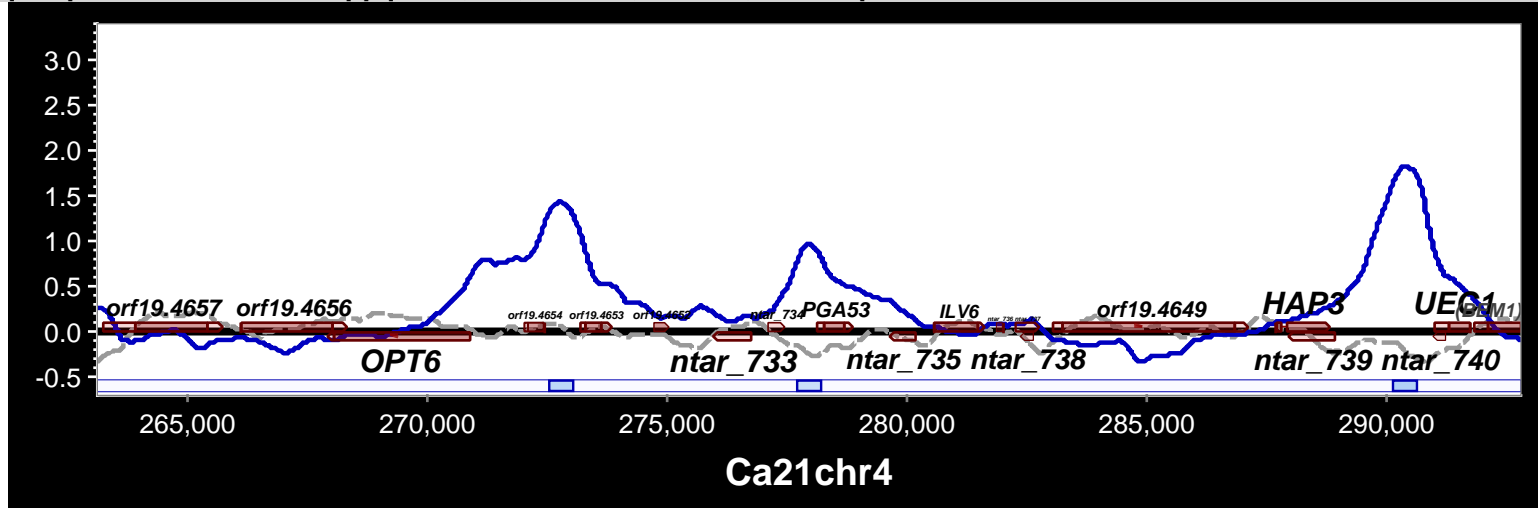



[0.955] Ca21chr3:1687027-1716710 [+] [TPI1, orf19.6747, orf19.6744, orf19.6748, orf19.6742]

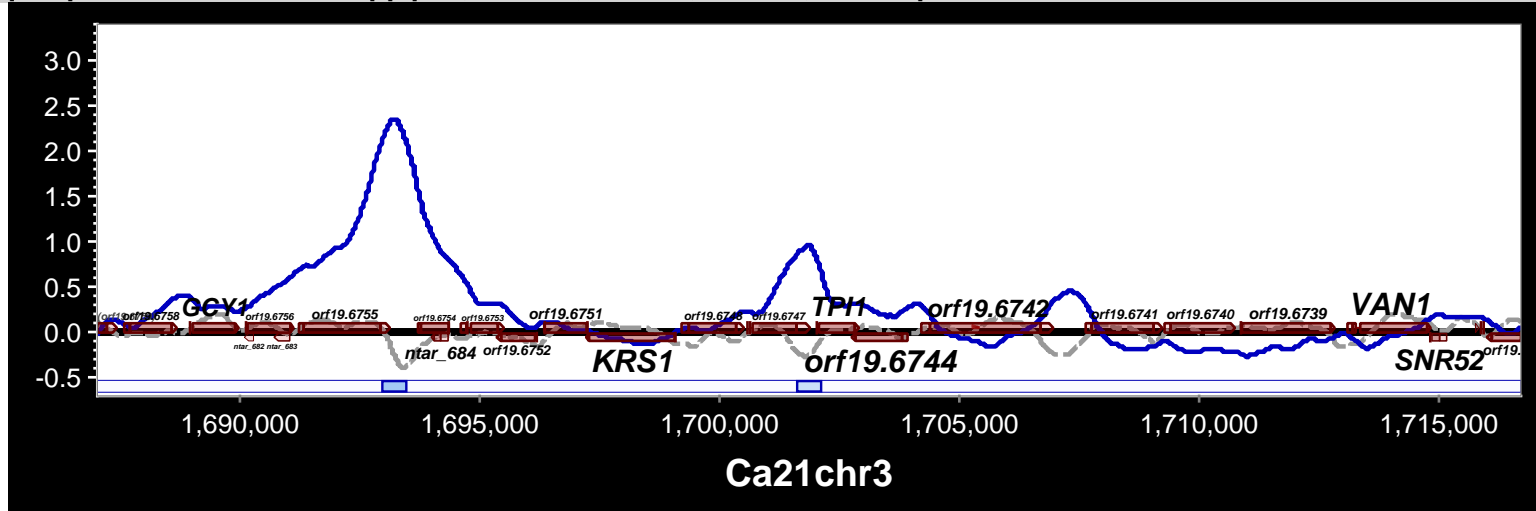

[0.953] Ca21chr1:2452646-2482329 [+] [HAP43, orf19.680, FGR39, CHO1, orf19.676]

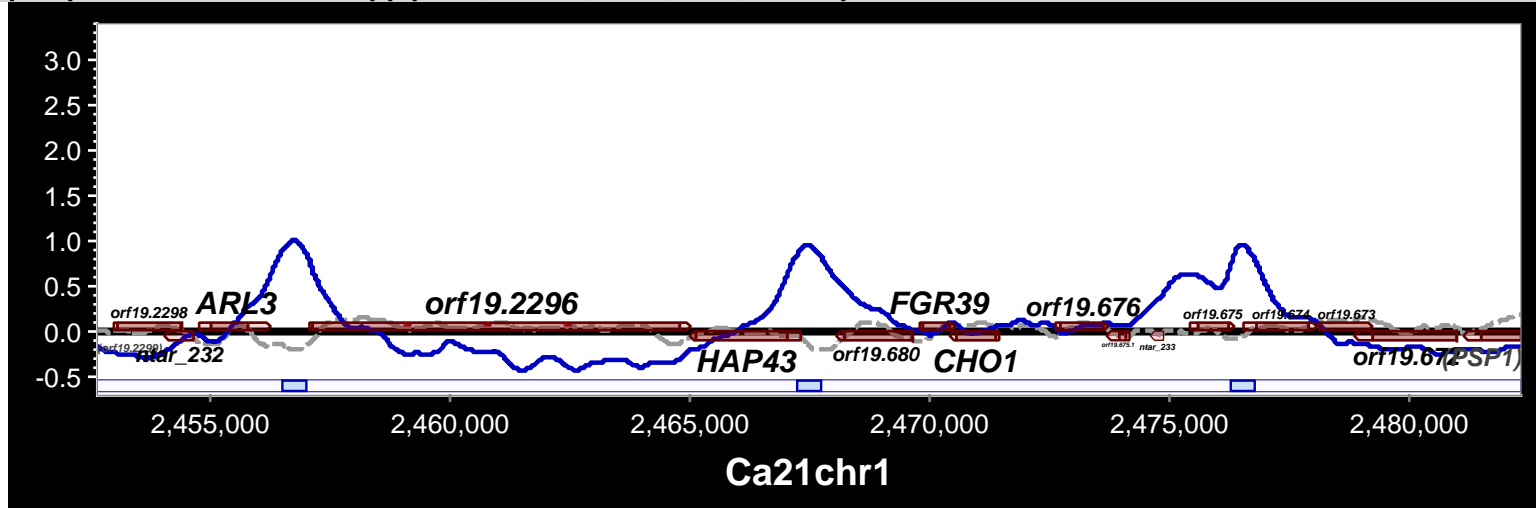

[0.947] Ca21chr1:1808238-1837921 [+] [OPY2, NOT5, TKL1, DIP2, ADH2]

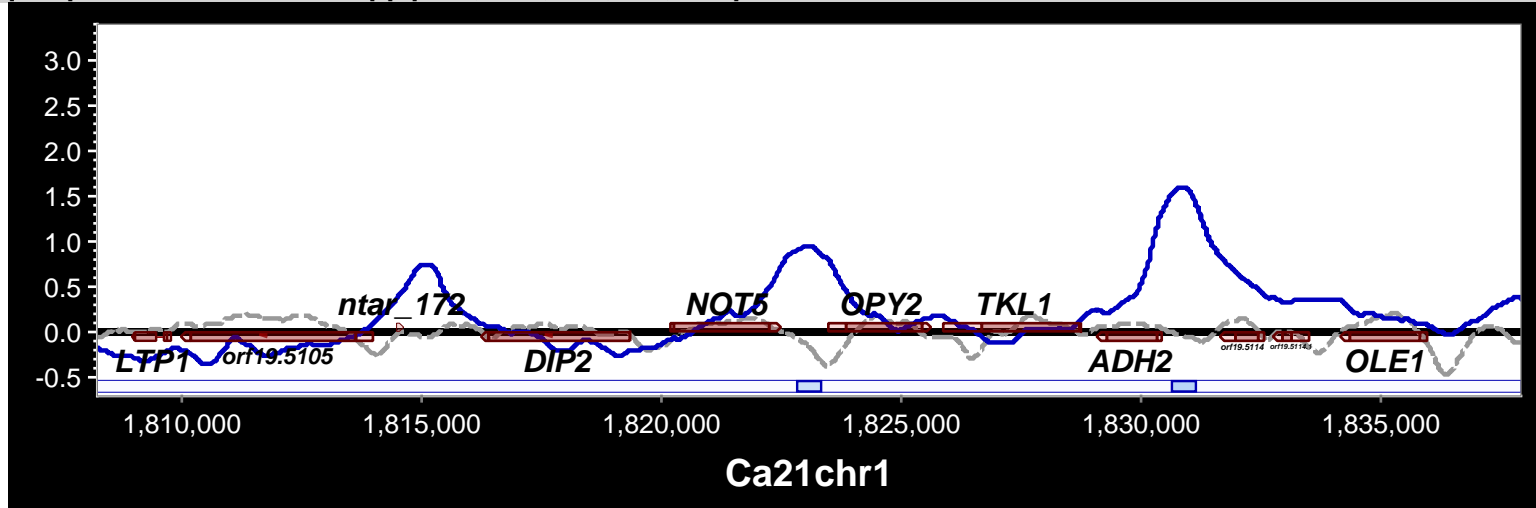

[0.946] Ca21chr2:311141-340824 [+] [MSB2, tL(CAA)1, orf19.1488, orf19.1490.1, orf19.1491]

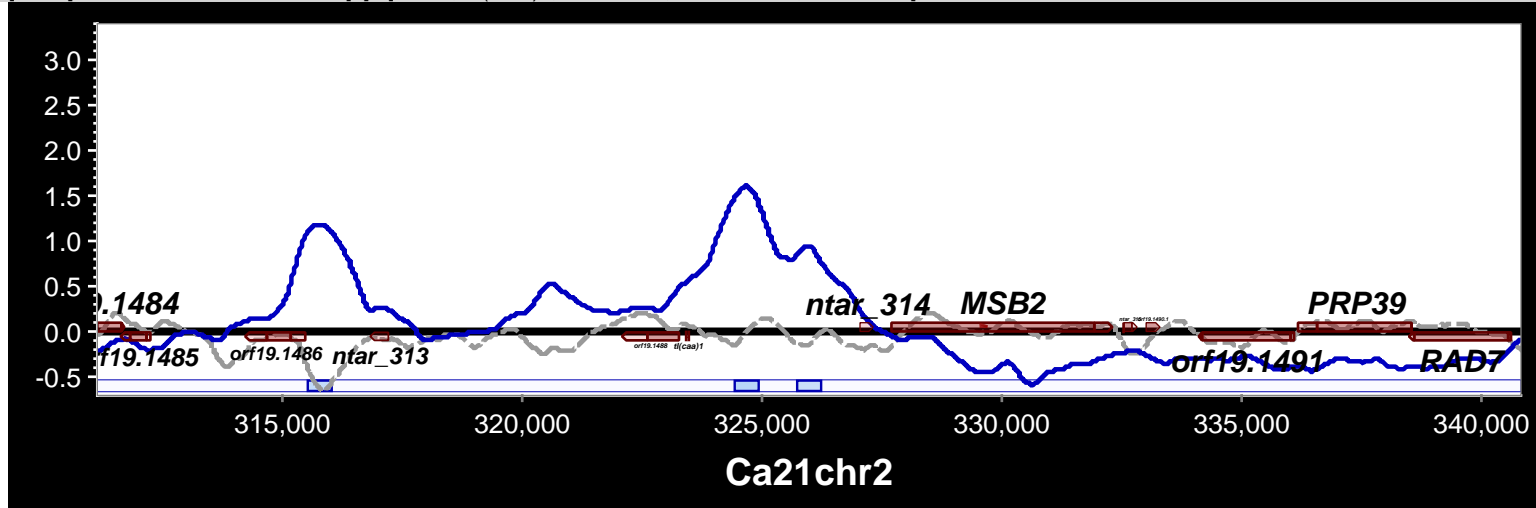

[0.945] Ca21chr2:1499668-1529351 [+] [orf19.1890, APR1, orf19.1889, orf19.1893, orf19.1888]

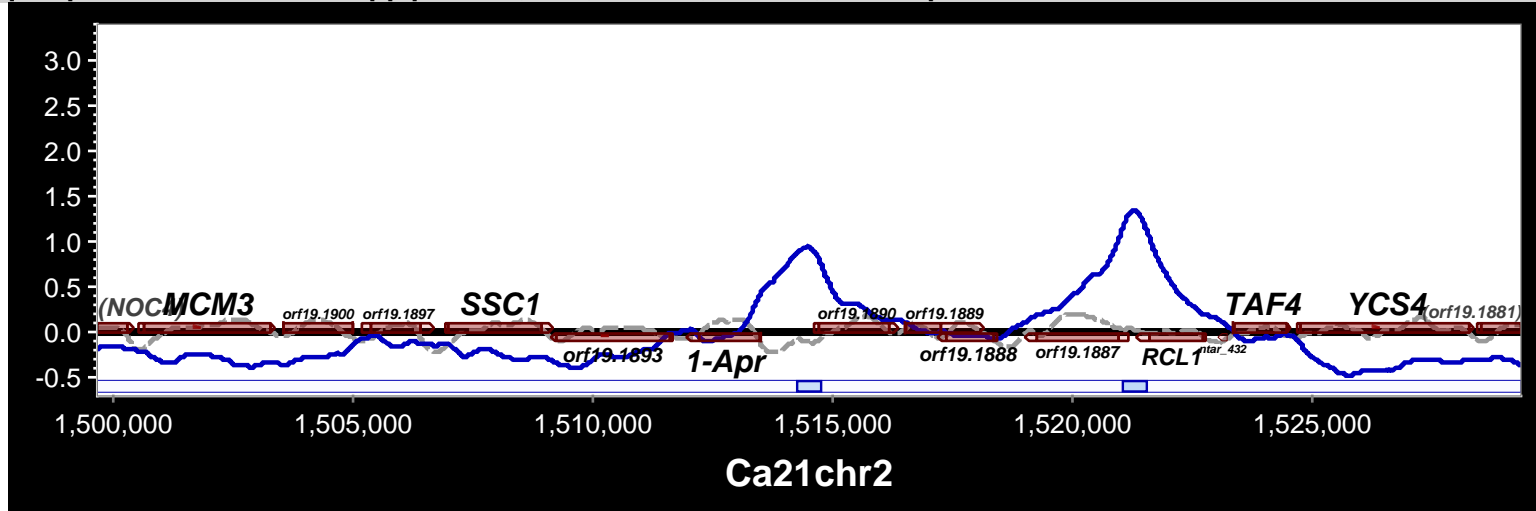

[0.943] Ca21chr1:2461687-2491370 [+] [orf19.674, orf19.675, orf19.673, orf19.675.1, orf19.676]

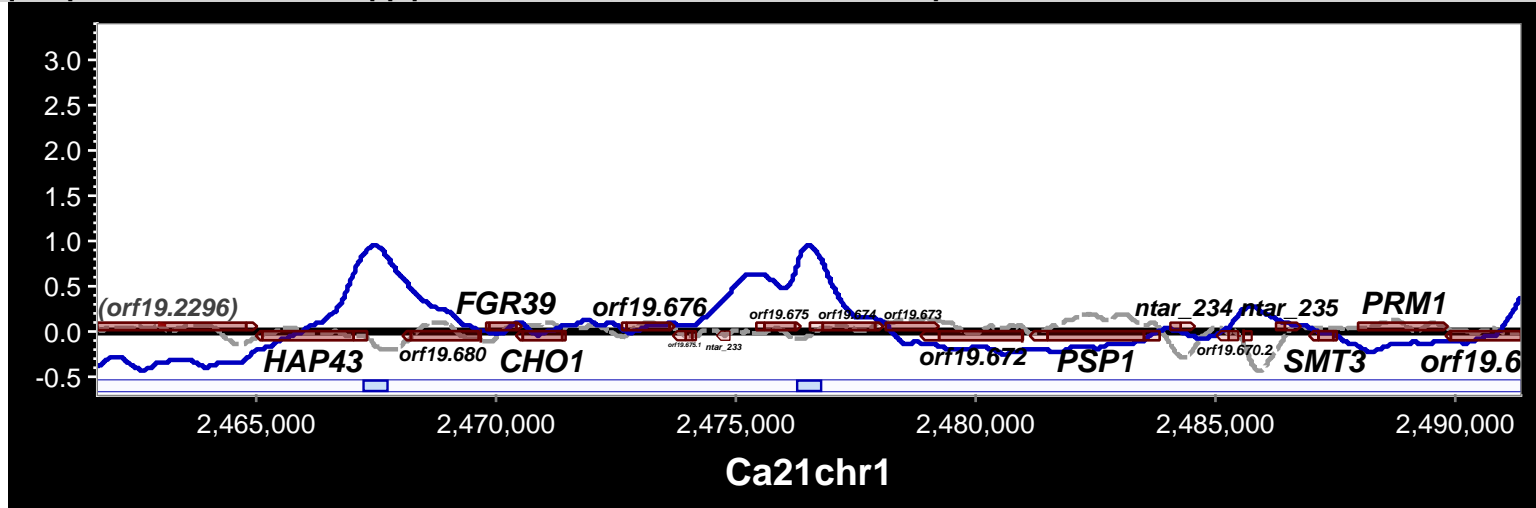

[0.943] Ca21chr3:215801-245484 [+] [orf19.2515, orf19.2516, orf19.158, orf19.2514, orf19.2513]

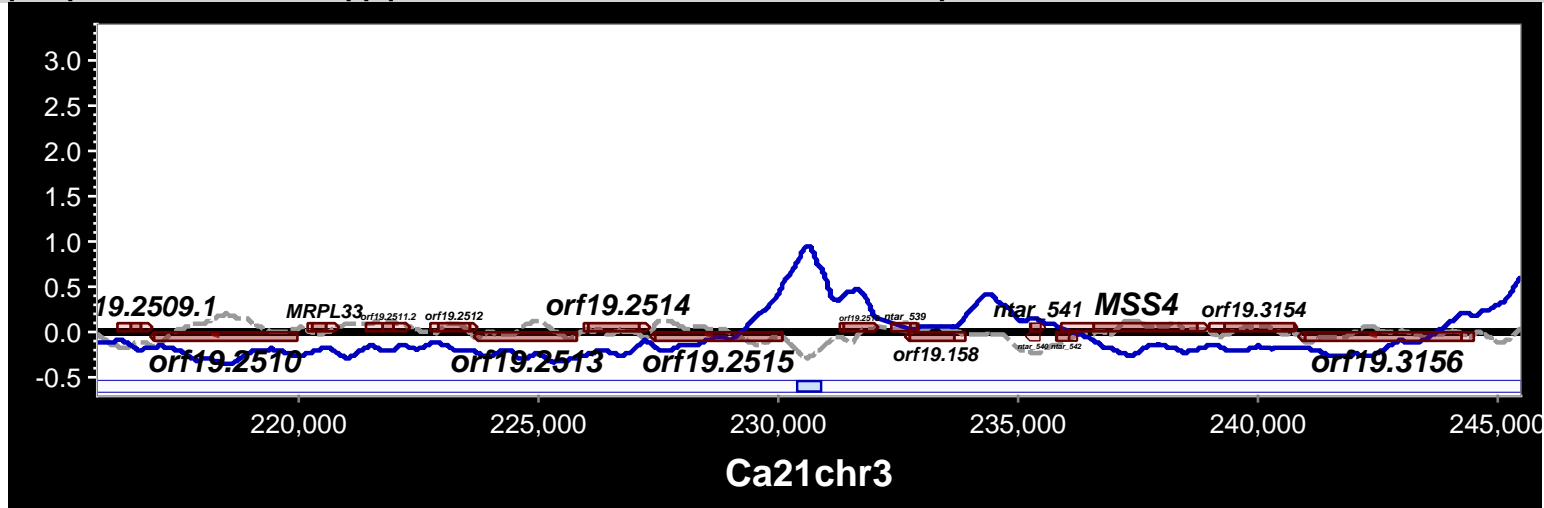

[0.942] Ca21chr2:1183957-1213640 [+] [orf19.5209, orf19.5210, orf19.5207, orf19.5206, orf19.5205]

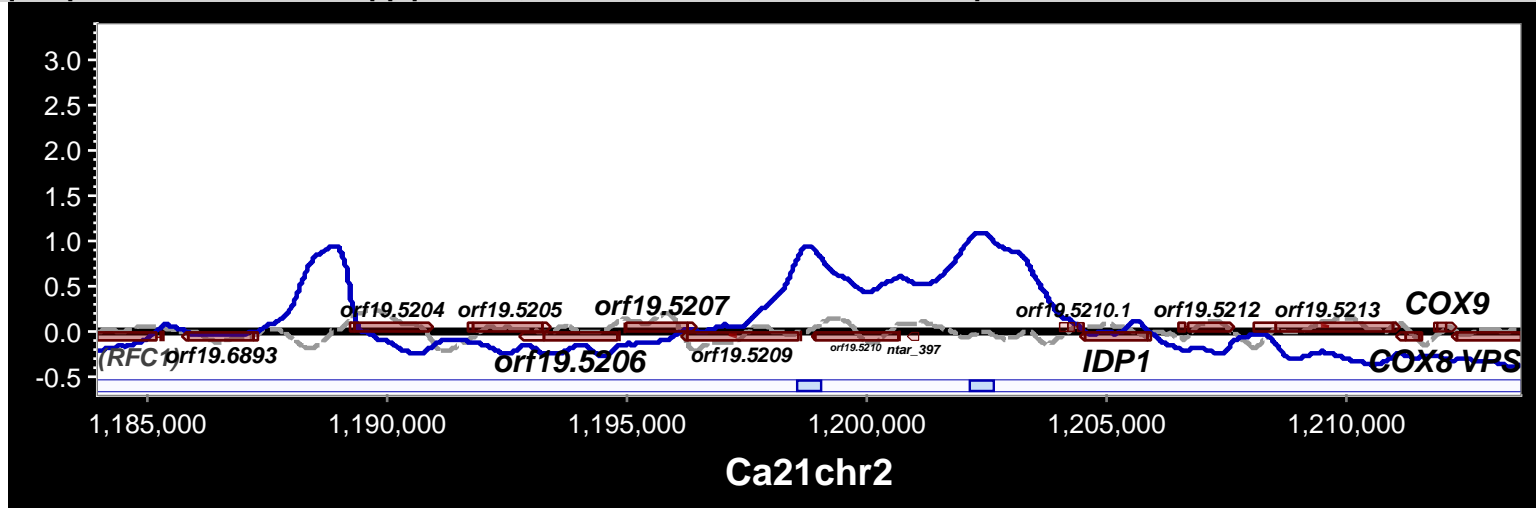

[0.942] Ca21chr5:281895-311578 [+] [orf19.1935, orf19.1934, SNF1, orf19.1933, orf19.1938]

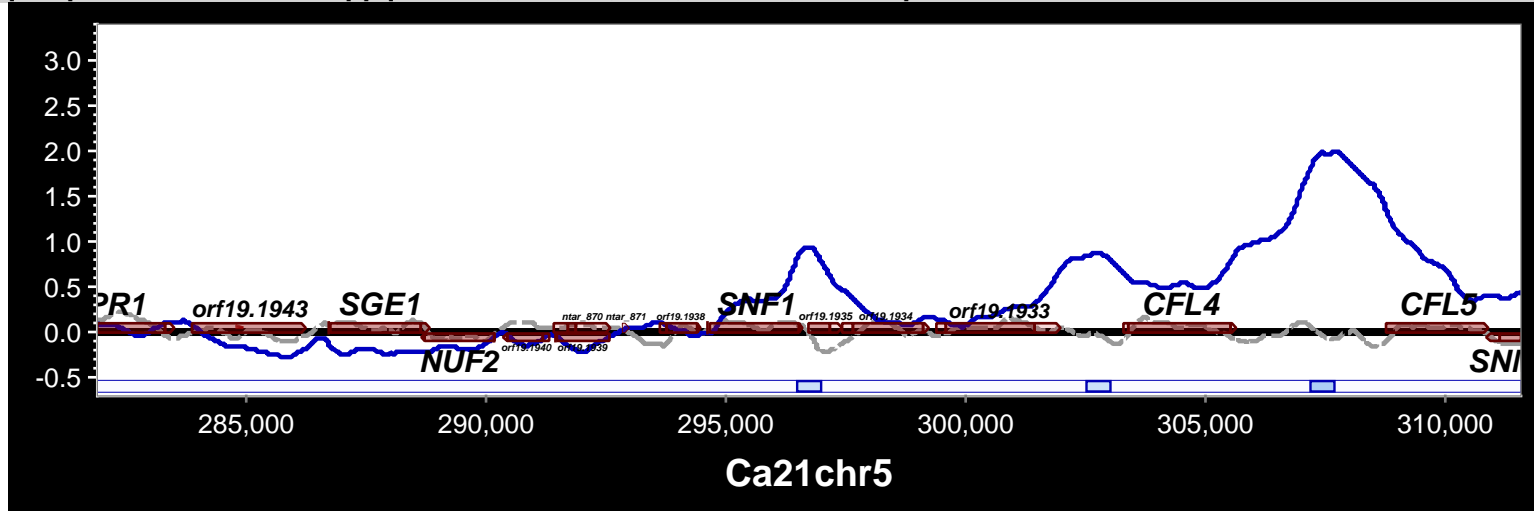

[0.941] Ca21chr5:391667-421350 [+] [FCR3, HIP1, STI1, orf19.3196, PAP1]

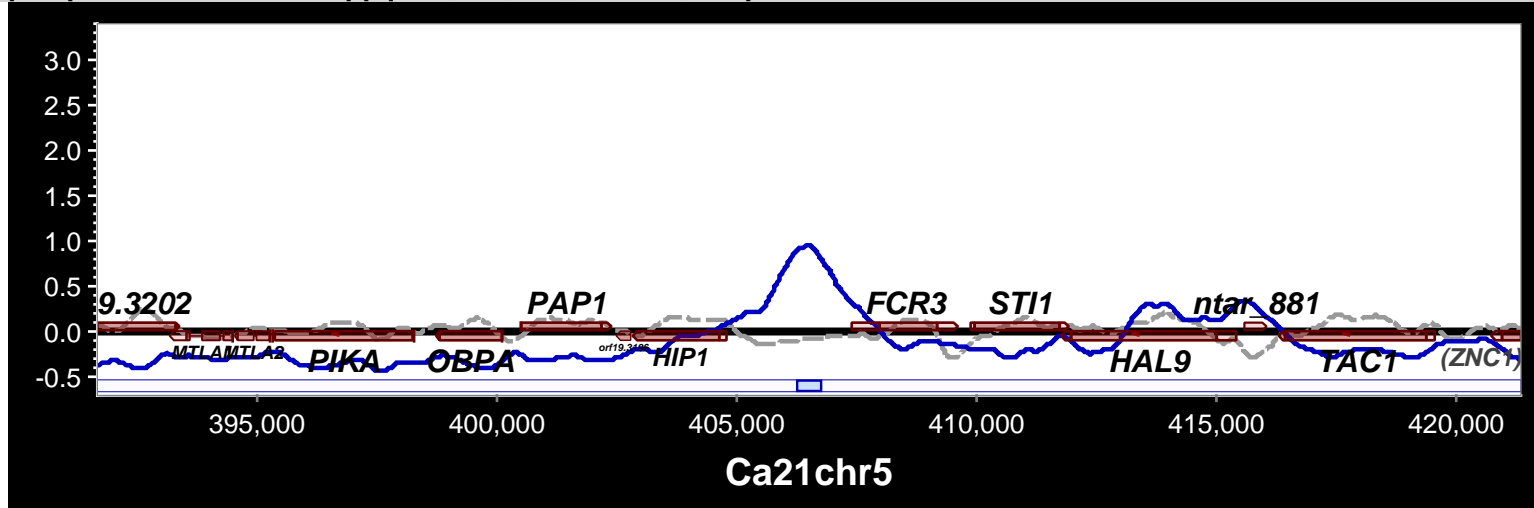

[0.939] Ca21chr1:51797-81480 [+] [orf19.6066, orf19.6065, orf19.6064, SVF1, UBP6]

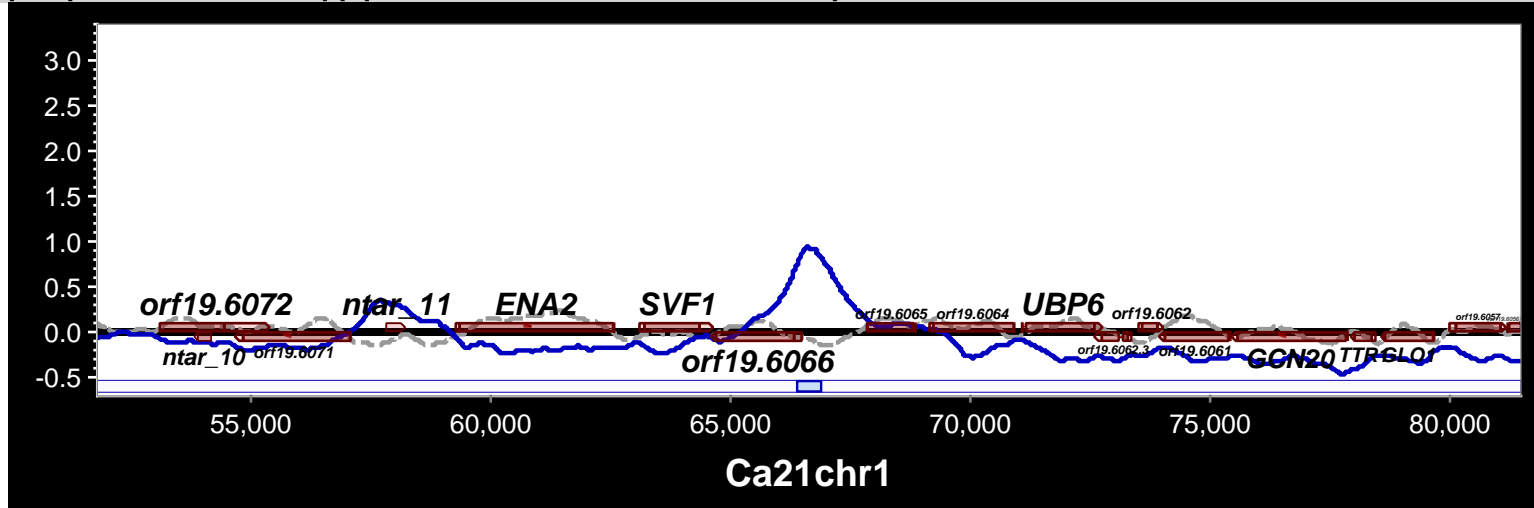

[0.939] Ca21chr3:1259364-1289047 [+] [CHS4, orf19.7347, orf19.7350, orf19.7002, orf19.7353]

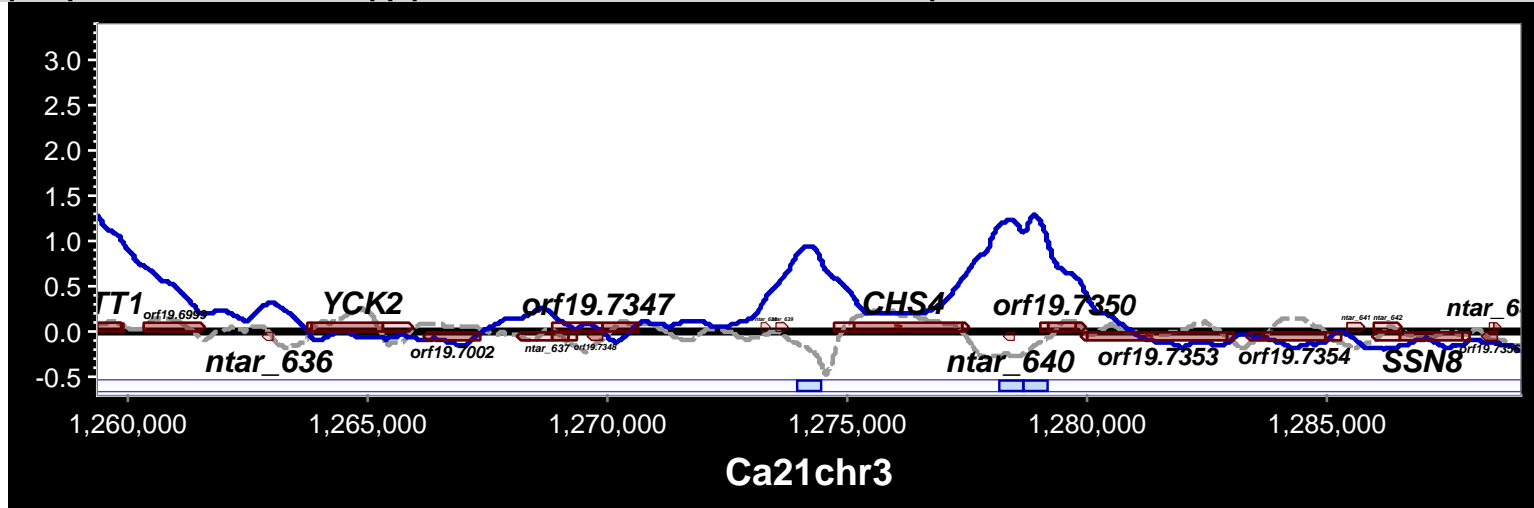

[0.939] Ca21chrR:518534-548217 [+] [PHO112, orf19.3726, orf19.3728, orf19.3730, orf19.3724]

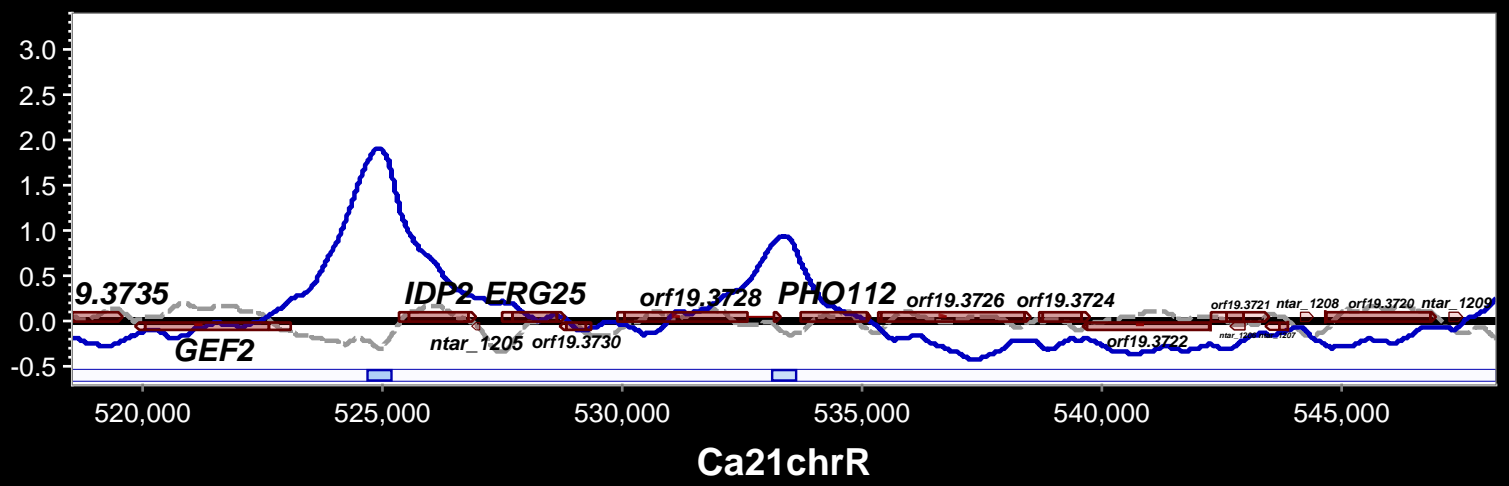

[0.935] Ca21chr1:1511572-1541255 [+] [GAP4, orf19.4455, TAF145, RIA1, orf19.4450.2]

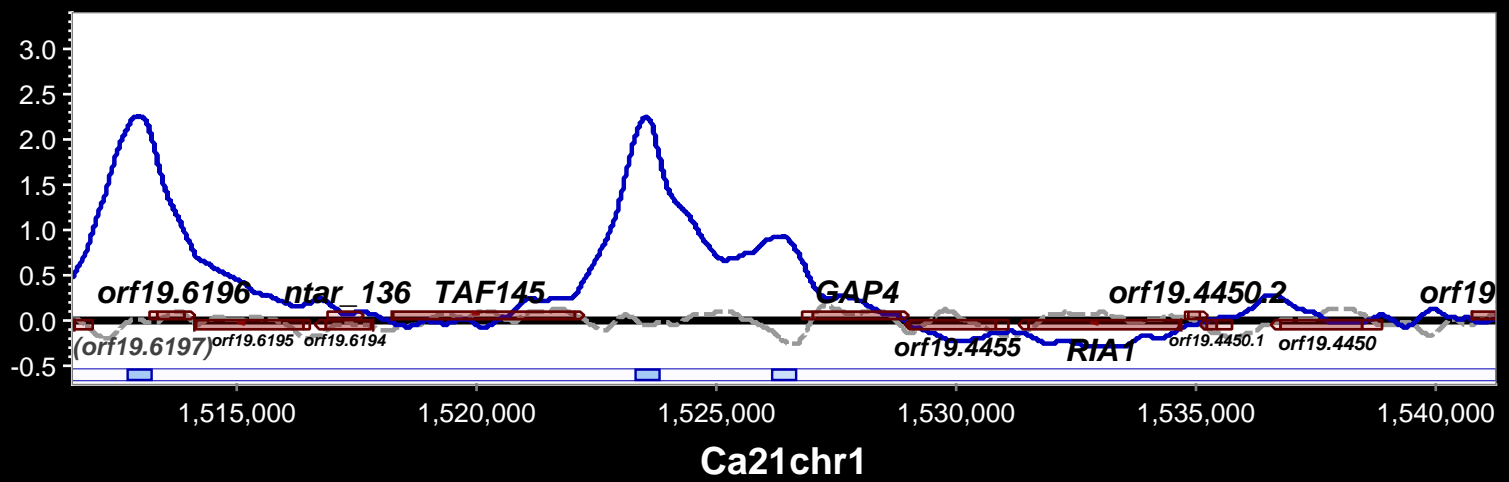

[0.935] Ca21chrR:592556-622239 [+] [orf19.2825, RFG1, orf19.2826, orf19.2827, orf19.2828]

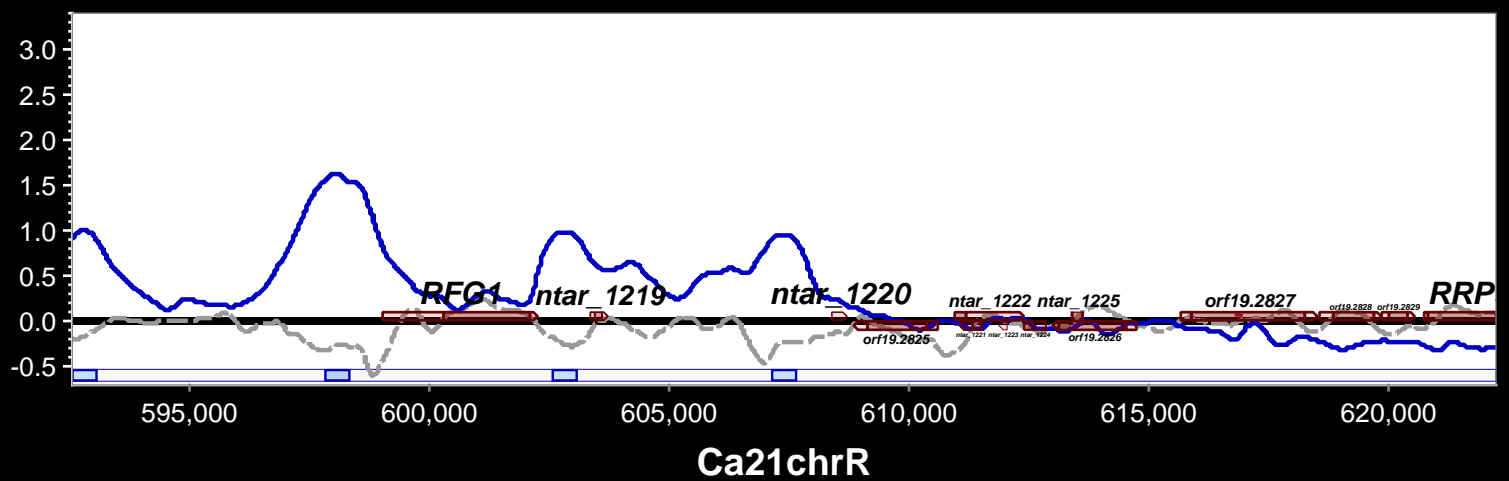

[0.933] Ca21chr1:1142951-1172634 [+] [orf19.413, RPS27A, orf19.414, orf19.412, orf19.415]

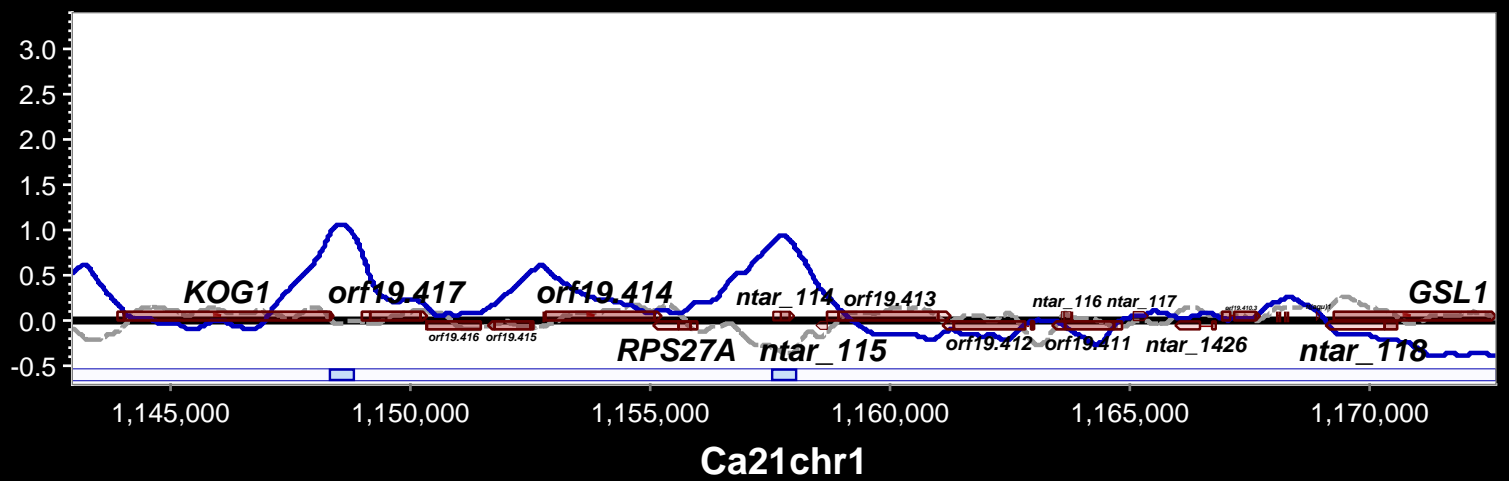

[0.932] Ca21chr2:544370-574053 [+] [orf19.5826, orf19.5825.1, orf19.5825, BUB2, orf19.5824]

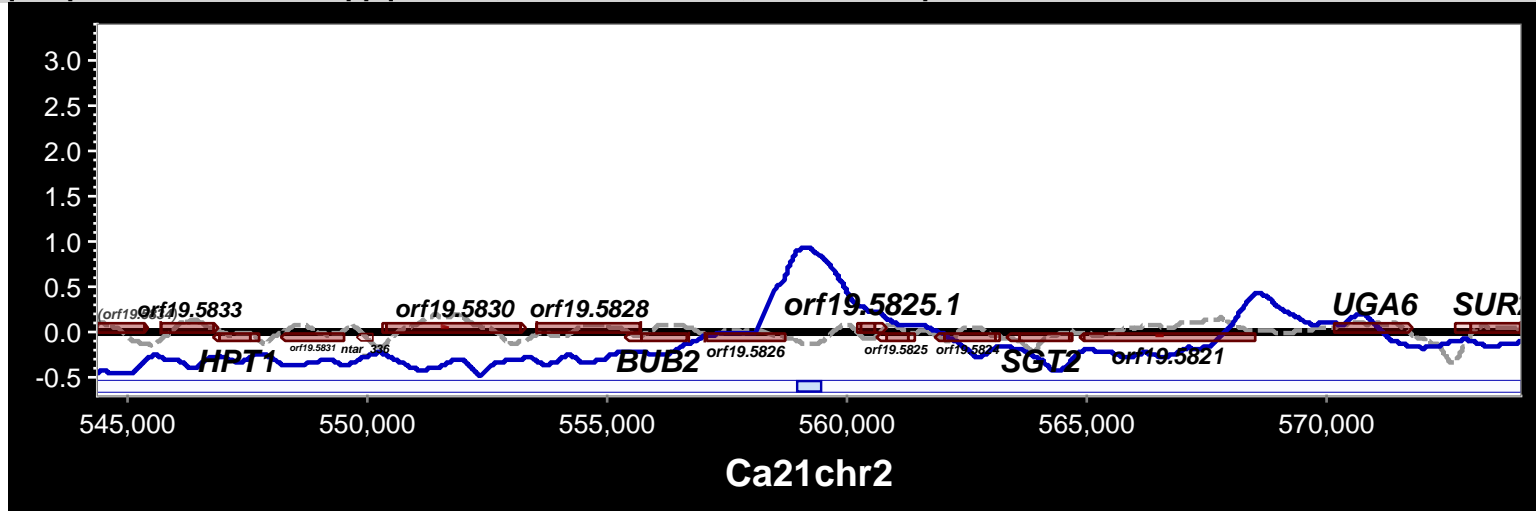

[0.931] Ca21chr2:2110463-2140146 [+] [orf19.1748, KIP2, orf19.1746, orf19.1750, orf19.1745]

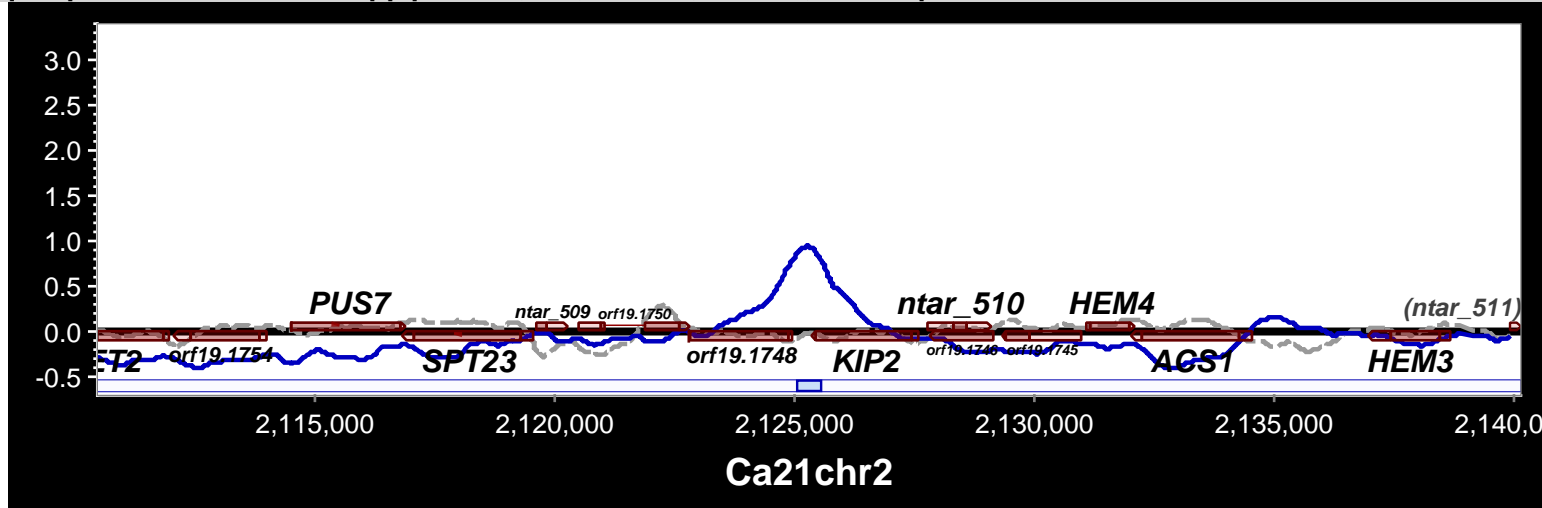

[0.93] Ca21chr2:1600661-1630344 [+] [VRP1, ALG7, orf19.2186, orf19.2191, orf19.2191.1]

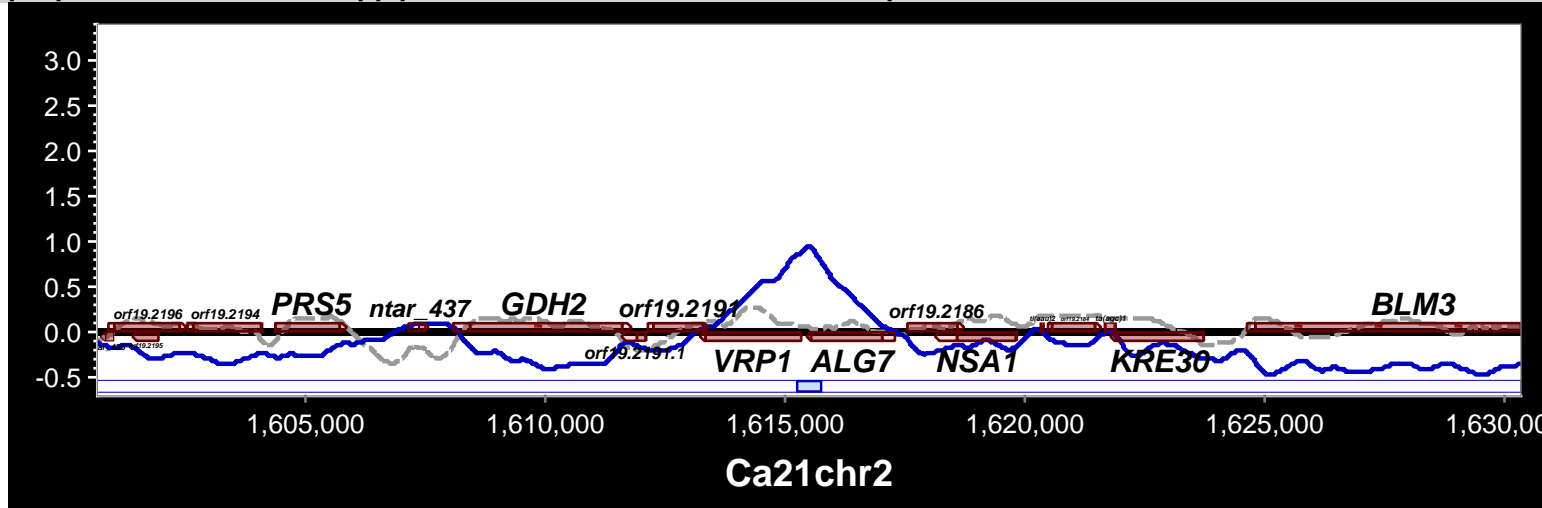

[0.93] Ca21chrR:37268-66951 [+] [orf19.7513, PCK1, orf19.7512, orf19.7511, orf19.7516]

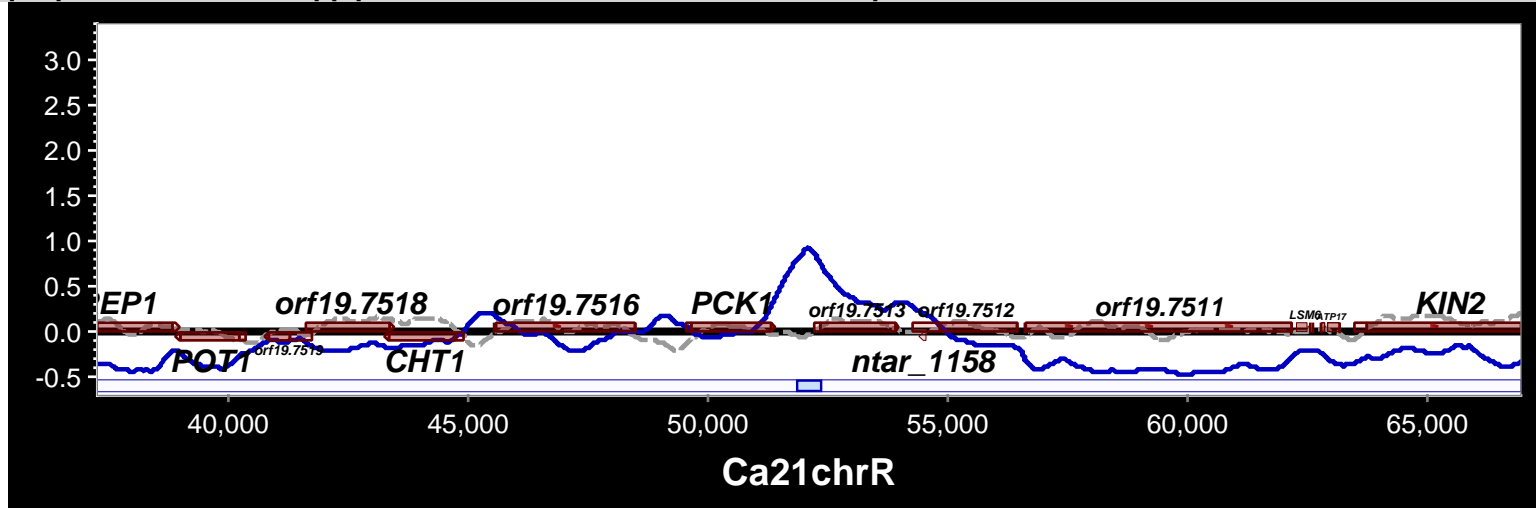

[0.929] Ca21chr2:1856177-1885860 [+] [IFF6, MET10, orf19.4070, orf19.4069, orf19.4068]

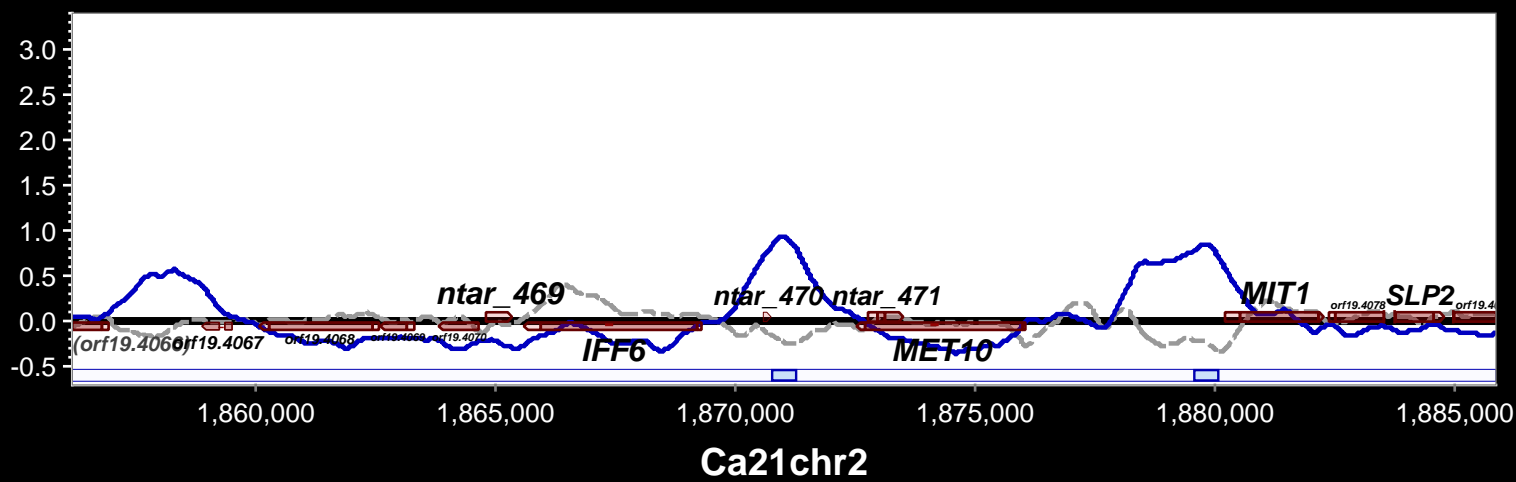

[0.927] Ca21chr1:209386-239069 [+] [orf19.3301, ZPR1, orf19.3302, CCH1, orf19.3303]

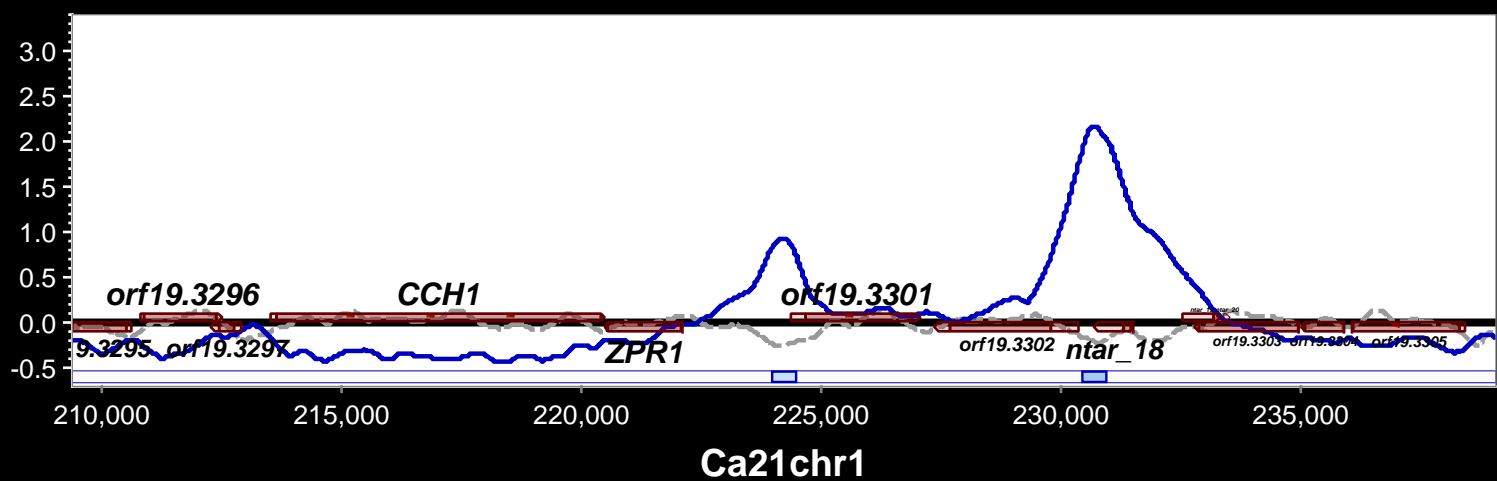

[0.925] Ca21chrR:1183491-1213174 [+] [orf19.6653, DBP8, orf19.5843, orf19.6650, BRF1]

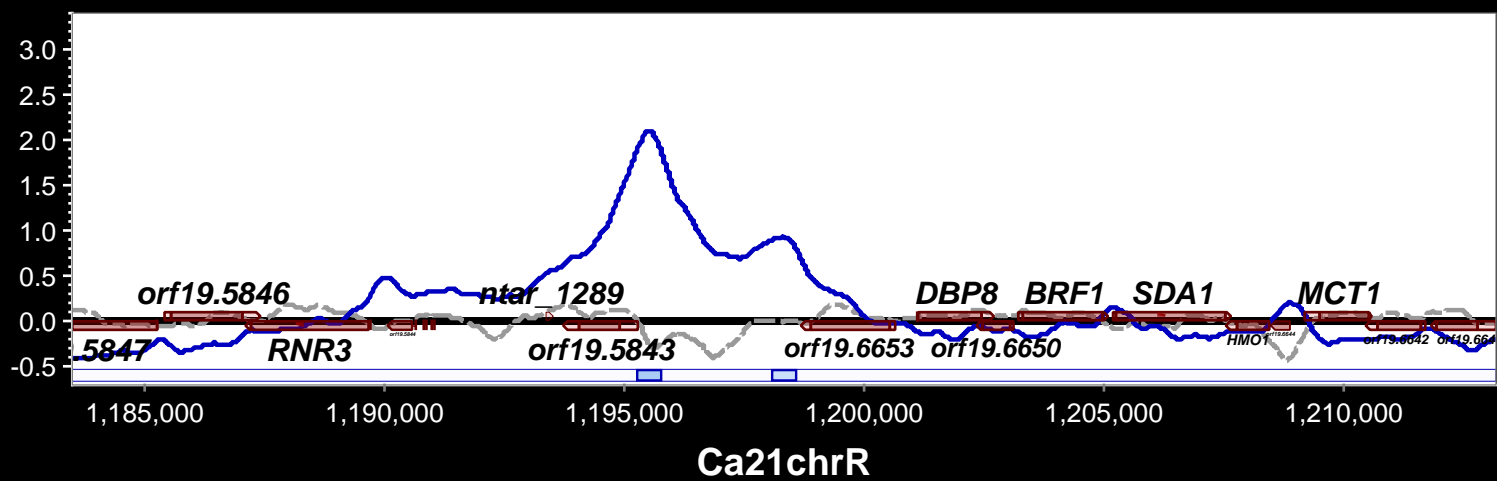

[0.924] Ca21chr5:103810-133493 [+] [orf19.934, orf19.933, orf19.932, AGA1, orf19.931]

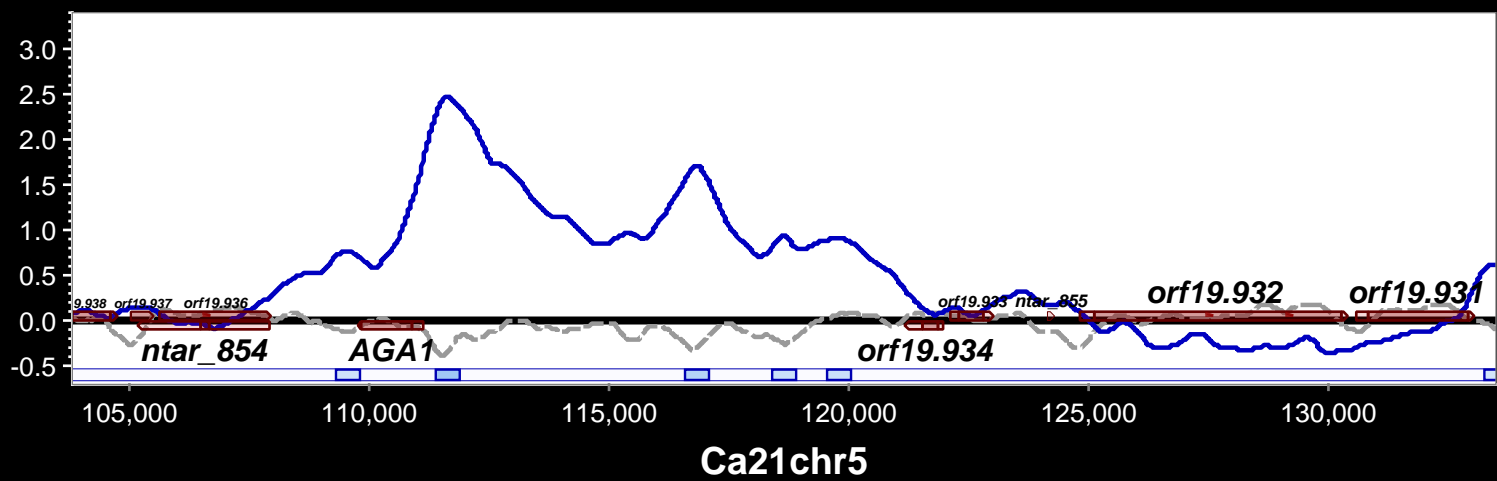

[0.921] Ca21chr3:36057-65740 [+] [orf19.5431, TPT1, BUD21, orf19.5433, orf19.5429]

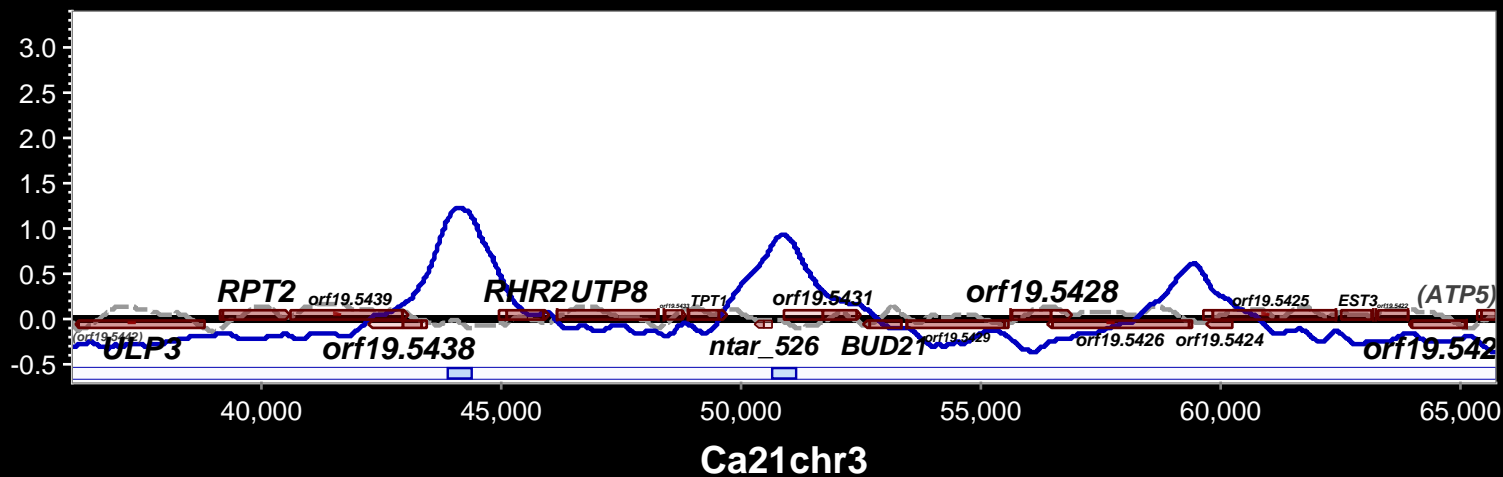

[0.92] Ca21chrR:1004195-1033878 [+] [orf19.1737, orf19.1736, UGP1, tS(GCU)2, tS(GCU)1]

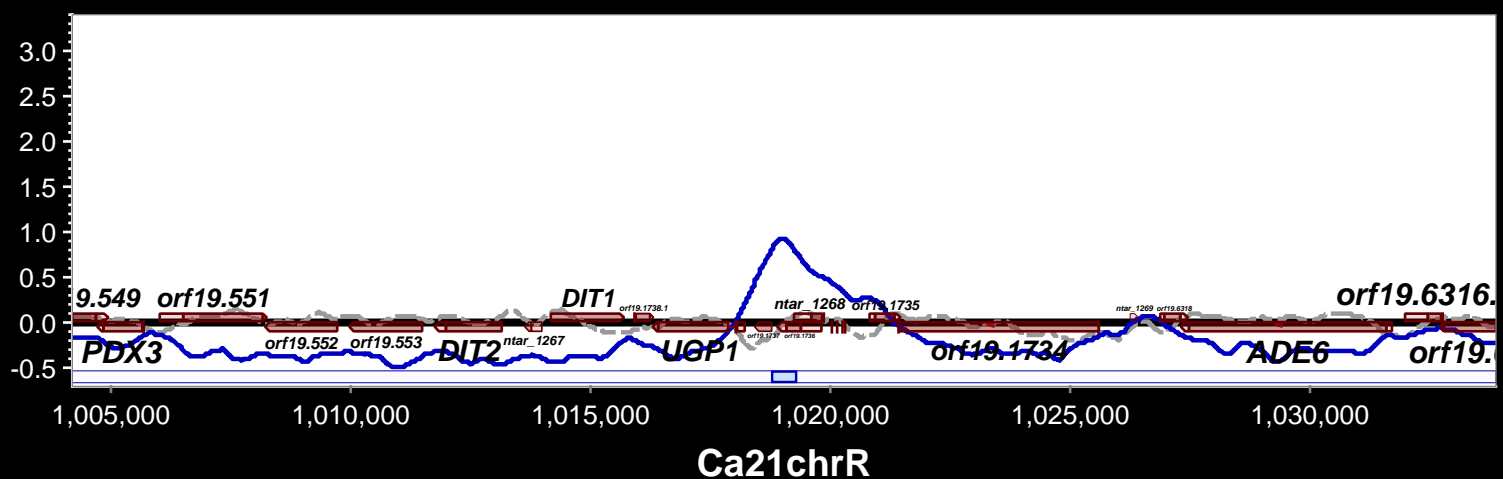

[0.919] Ca21chr7:753545-783228 [+] [orf19.6705, orf19.6704, orf19.1330, GYP7, HSM3]

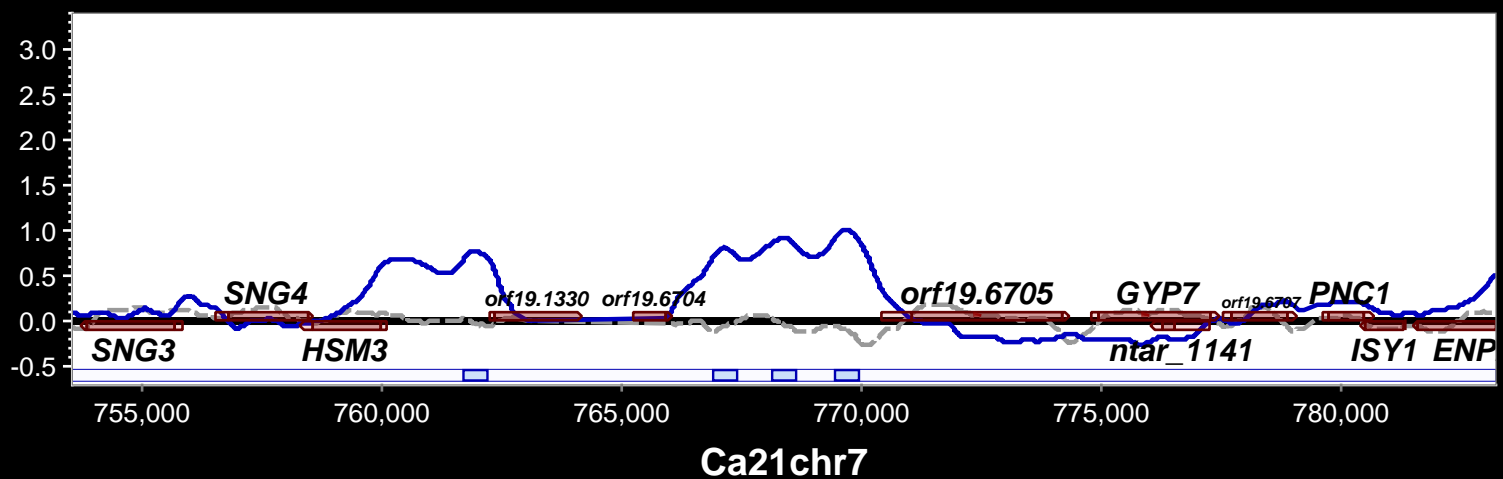

[0.918] Ca21chr2:424845-454528 [+] [orf19.1539, TLG2, orf19.1536, orf19.1541, orf19.1535]

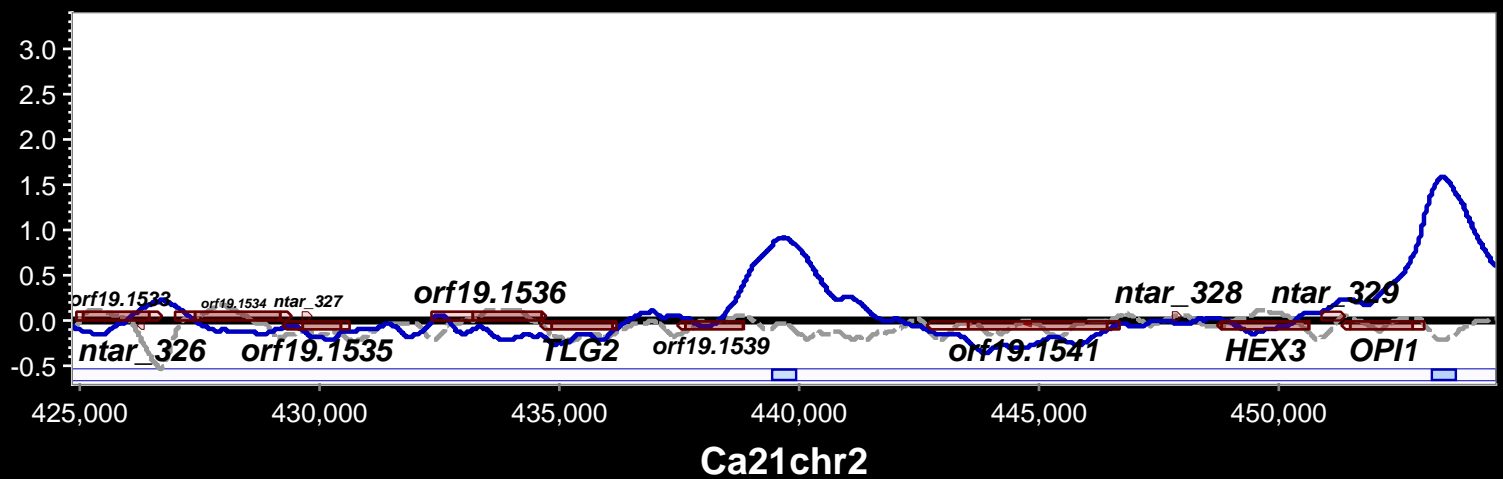

[0.918] Ca21chr3:269447-299130 [+] [orf19.1718, SGA1, orf19.1717, orf19.1720, URA3]

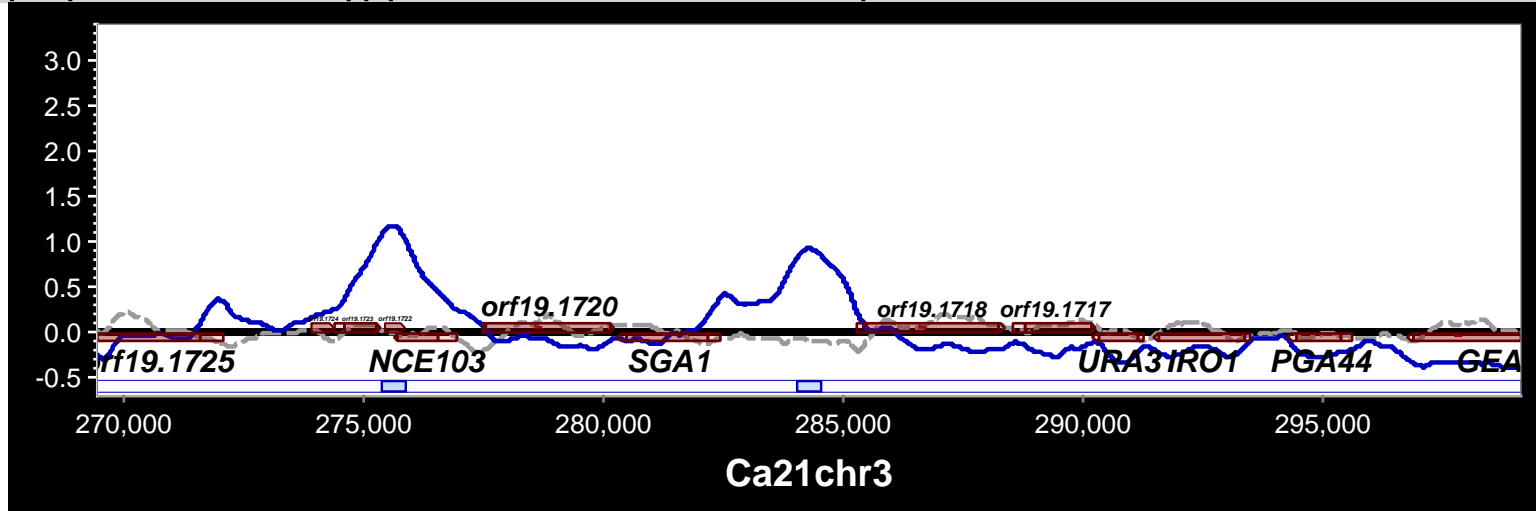

[0.917] Ca21chr3:1185642-1215325 [+] [orf19.6978, GPI1, orf19.6979, orf19.6976, orf19.6980]

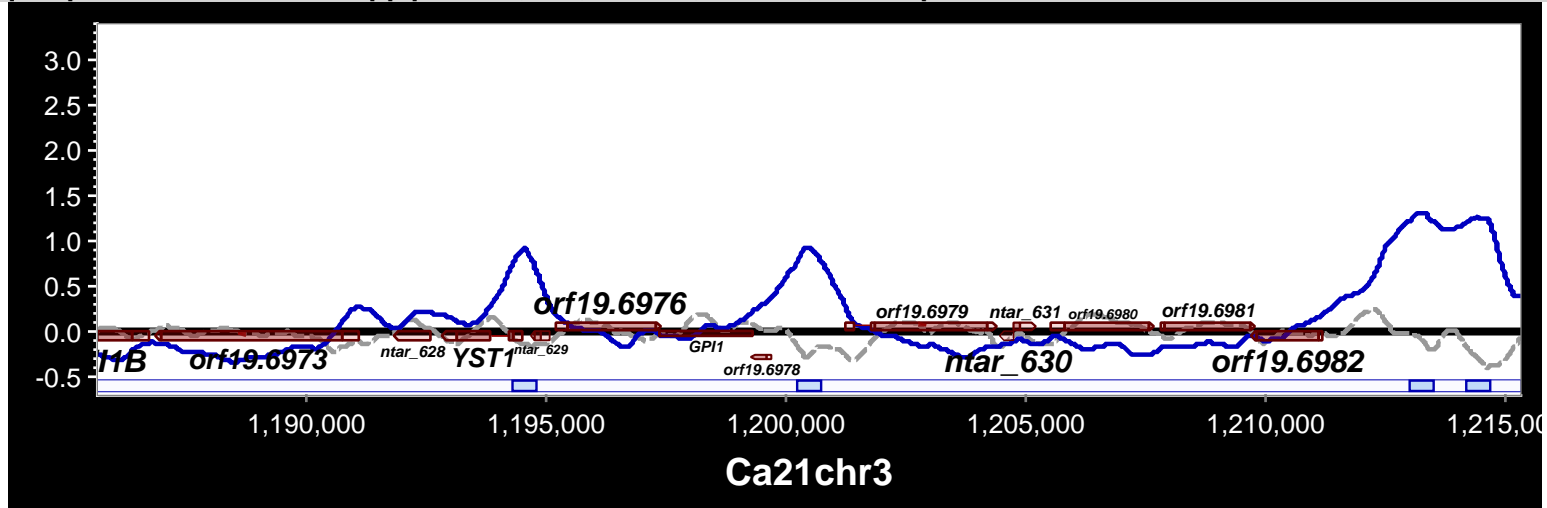

[0.916] Ca21chr1:1316942-1346625 [+] [orf19.177, orf19.1821, orf19.6280, orf19.6277, UME6]

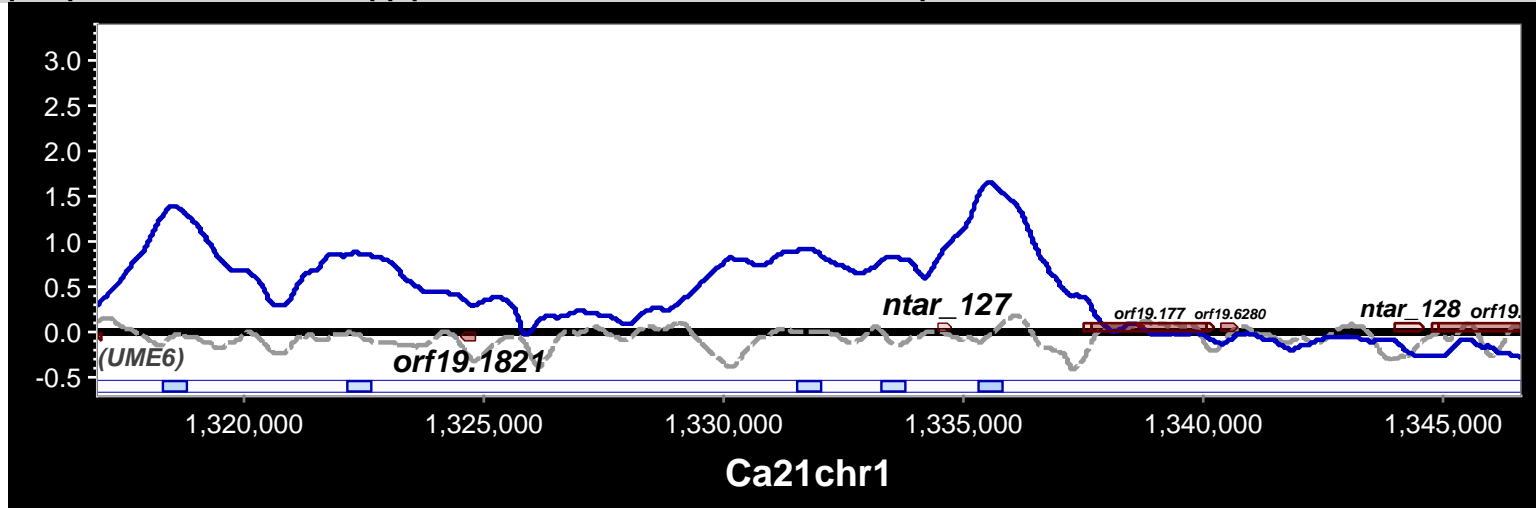

[0.916] Ca21chr5:956219-985902 [+] [orf19.3925, orf19.3926, orf19.3924, orf19.3928, orf19.3929]

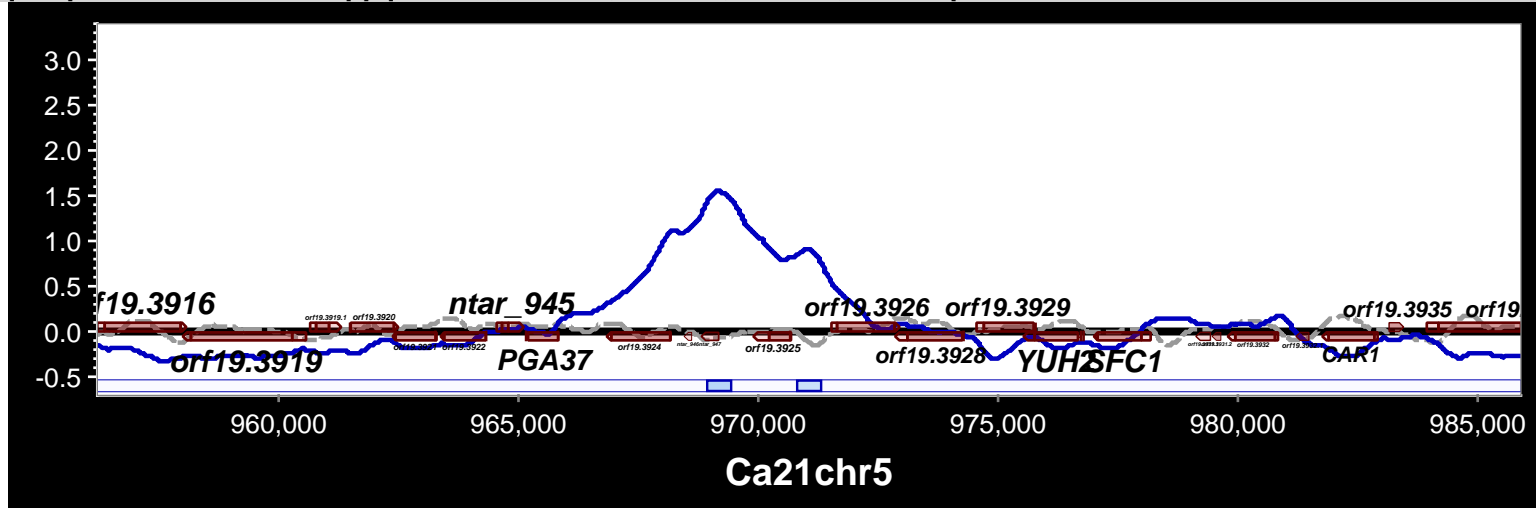



[0.915] Ca21chr5:104955-134638 [+] [orf19.934, orf19.933, orf19.932, AGA1, orf19.931]

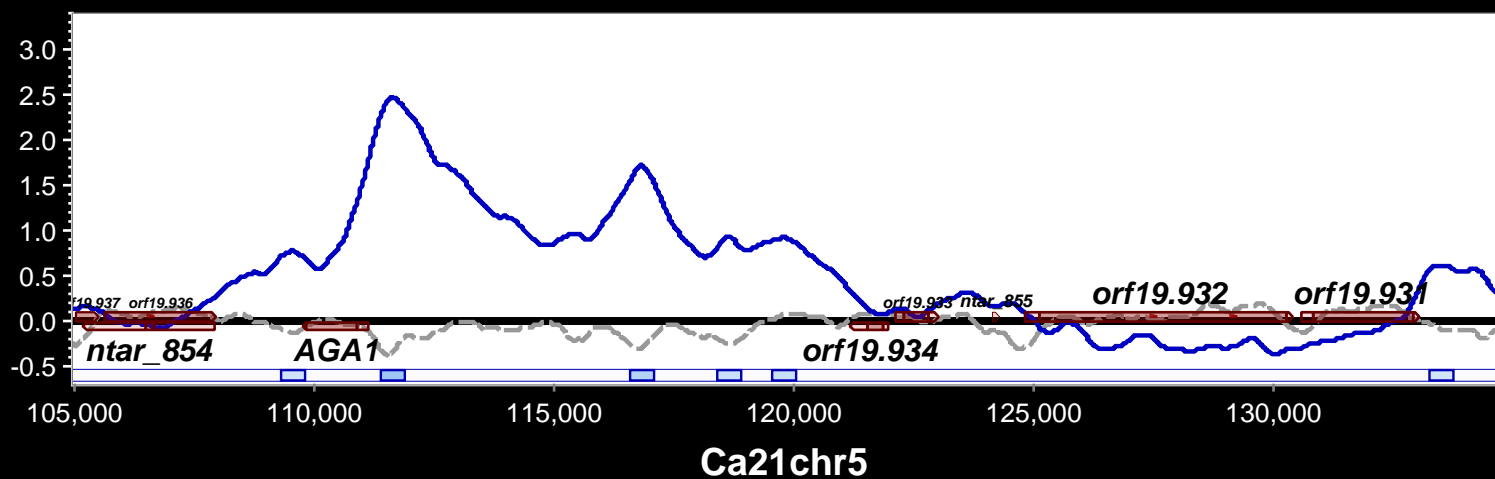

[0.915] Ca21chrR:2256706-2286389 [+] [orf19.7662, orf19.7663, orf19.7664, orf19.7665, HMI1]

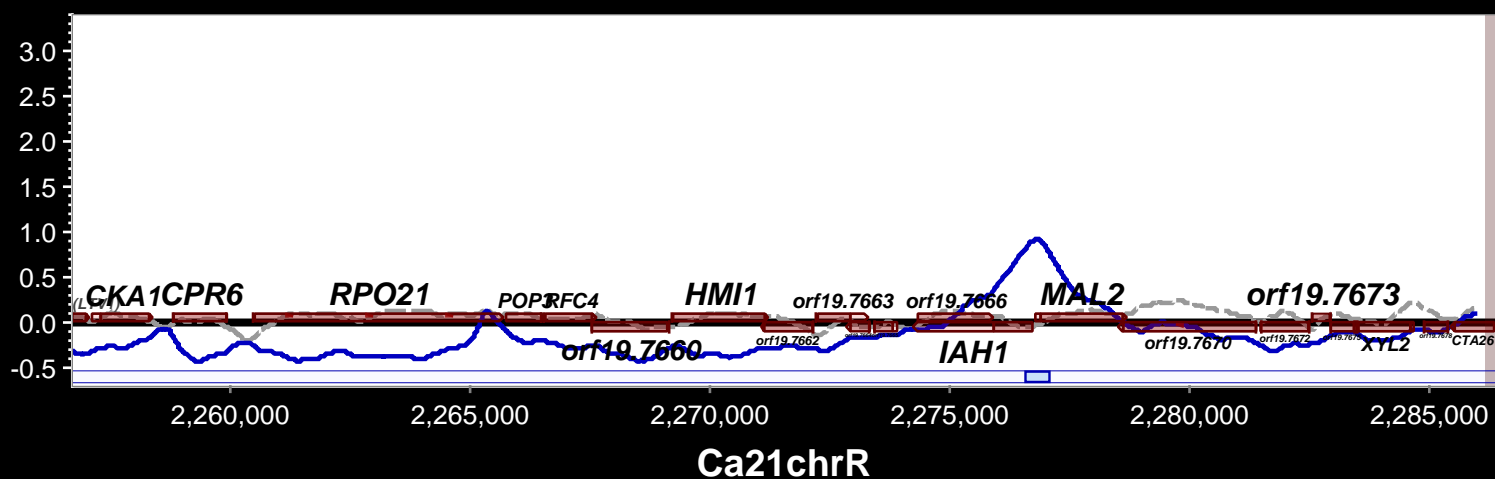

[0.914] Ca21chrR:623938-653621 [+] [ALG5, orf19.2836, orf19.2838, orf19.2835, CIRT4B]

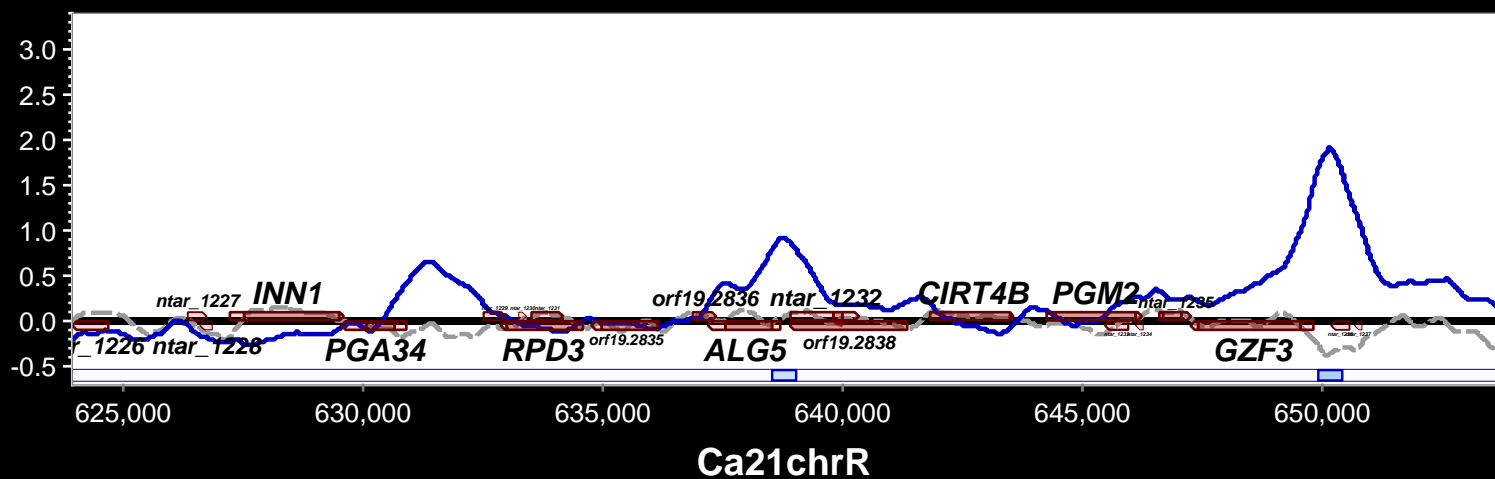

[0.913] Ca21chr5:622448-652131 [+] [HSL1, GRP2, orf19.4310, YNK1, orf19.4312]

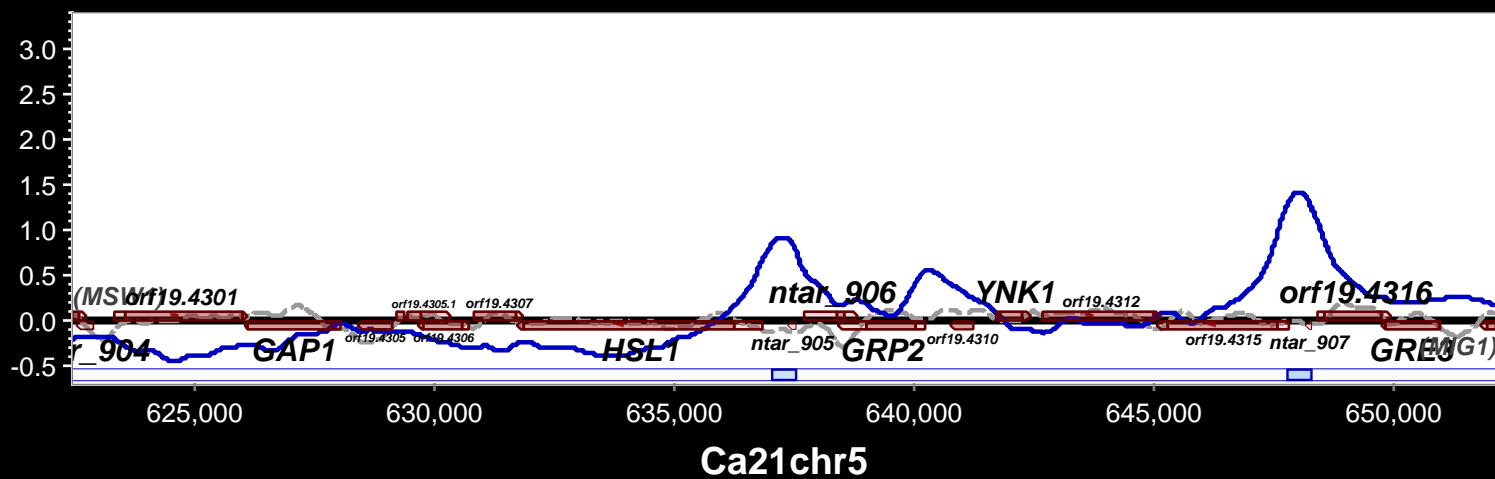

[0.913] Ca21chr6:24210-53893 [+] [orf19.1189, CPH2, orf19.1190, orf19.1191, orf19.1186]

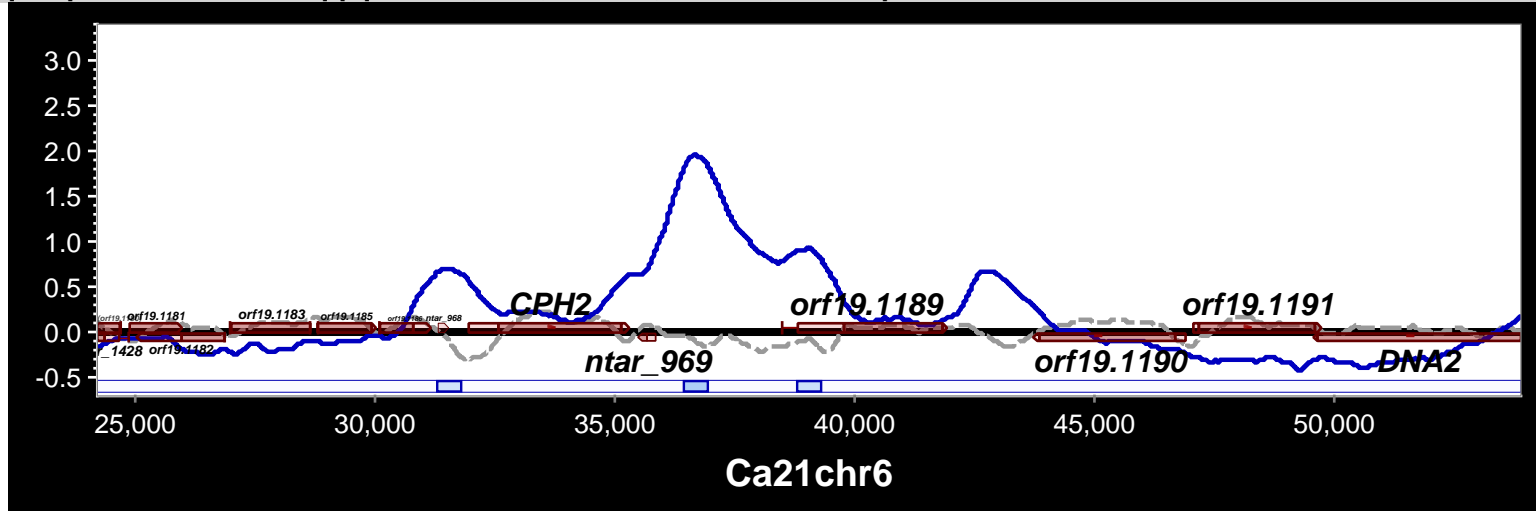

[0.912] Ca21chr3:592924-622607 [+] [FAA21, orf19.273, ADH4, TFC4, orf19.270]

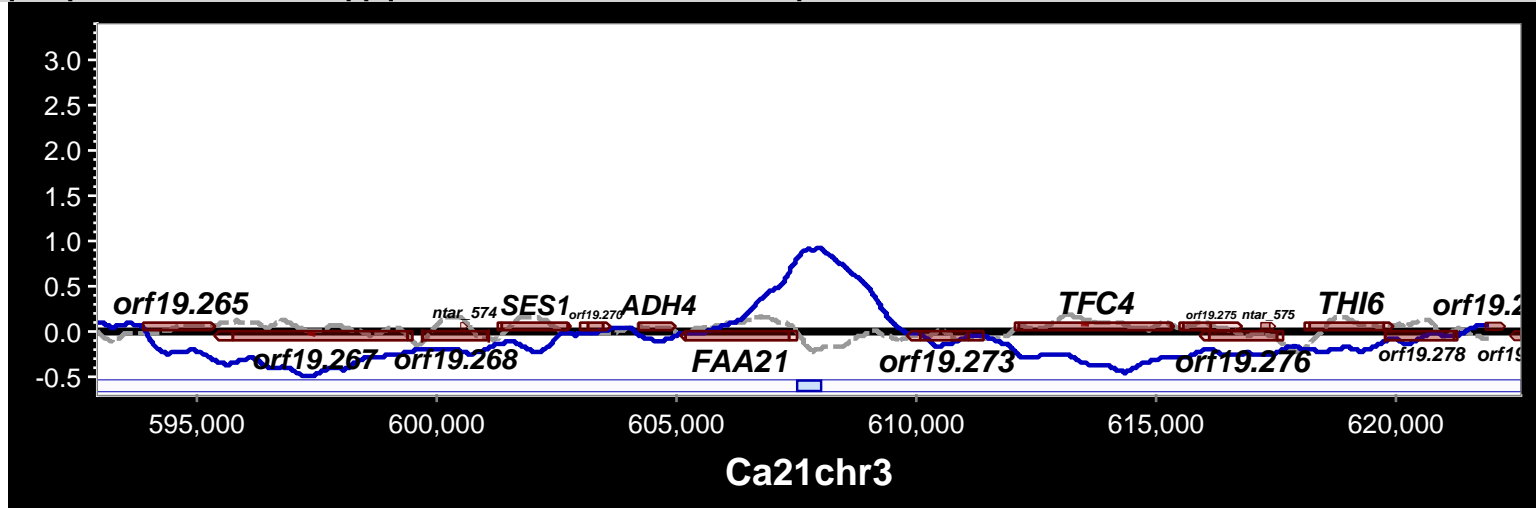

[0.912] Ca21chr6:417645-447328 [+] [orf19.3499, orf19.3501, orf19.3498, orf19.3496, RPL23A]

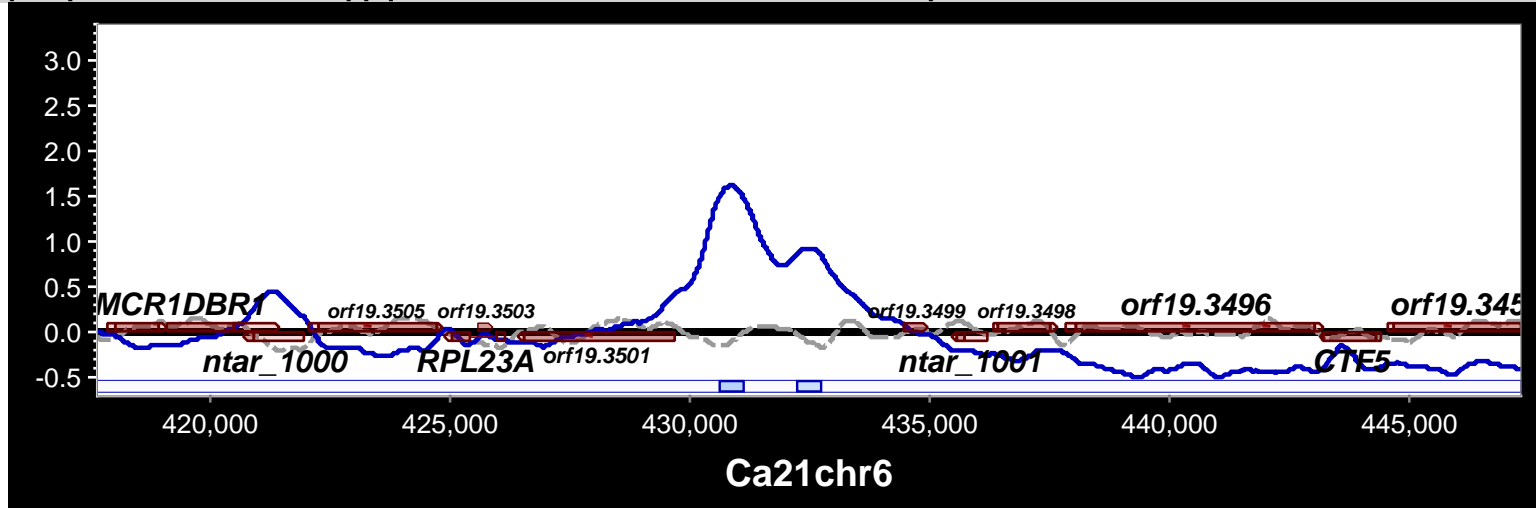

[0.911] Ca21chr4:1570473-1600156 [+] [orf19.3087.1, UBI3, orf19.3087.2, orf19.3086, orf19.3088]

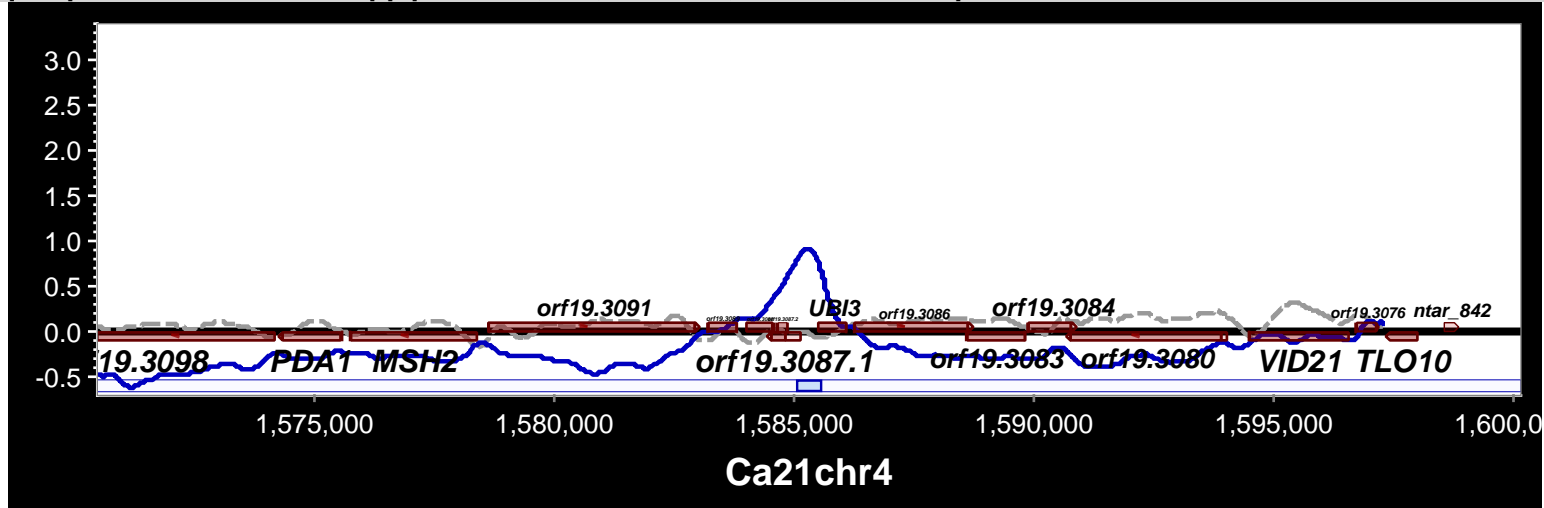

[0.91] Ca21chr3:1179707-1209390 [+] [YST1, orf19.6976, orf19.6973, GPI1, orf19.6978]

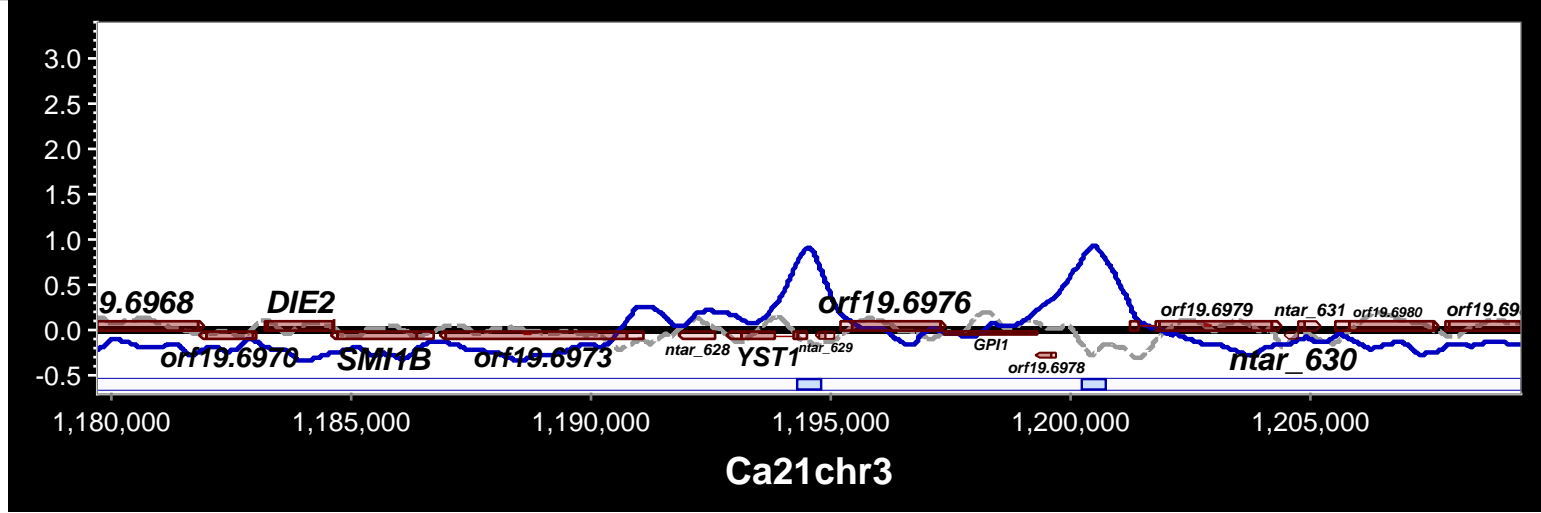

[0.909] Ca21chr1:2736868-2766551 [+] [SPA2, orf19.3755, CHR1, ATP20, orf19.6360]

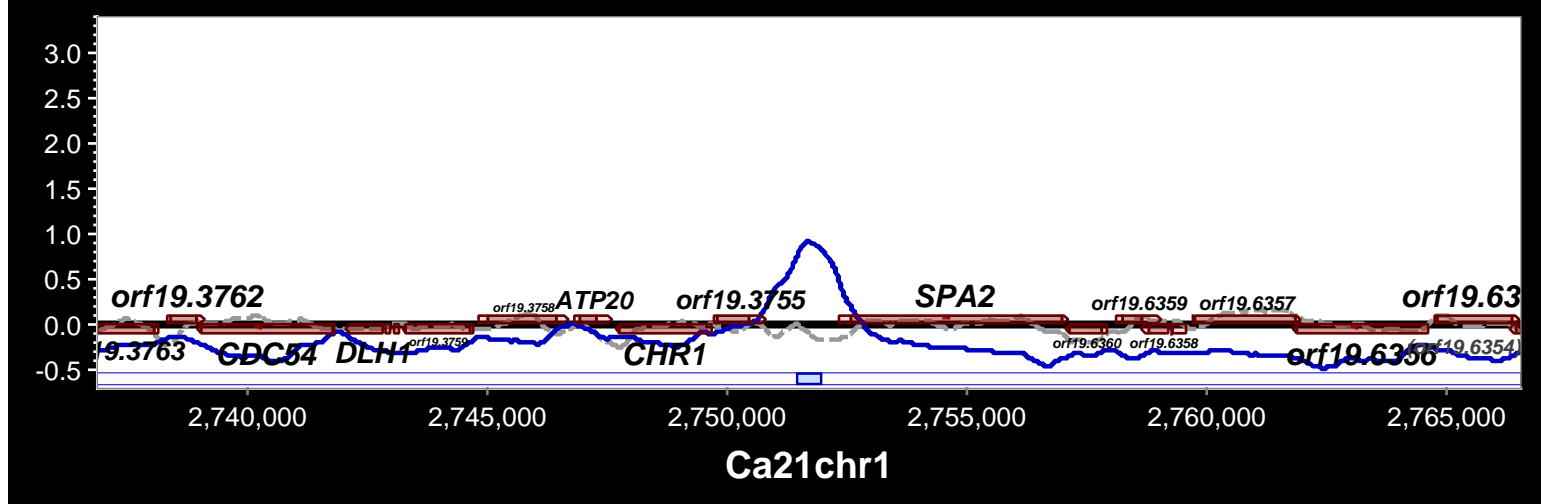

[0.908] Ca21chr1:2615387-2645070 [+] [KIP4, orf19.5264, SER33, orf19.5266, orf19.5262]

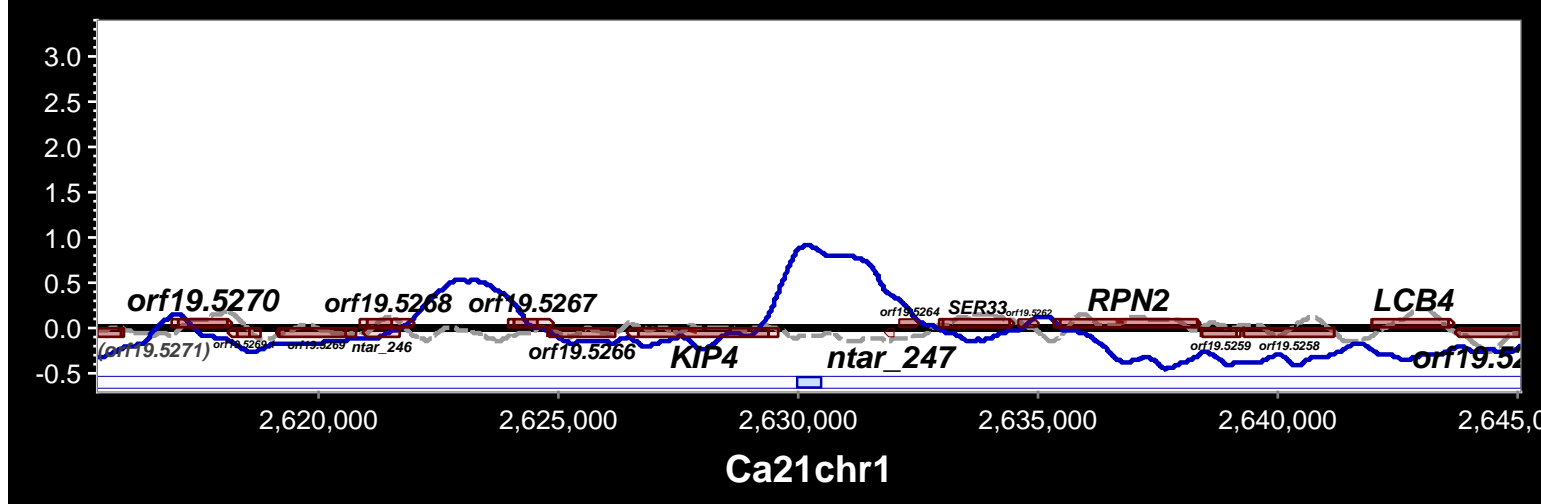

[0.908] Ca21chr3:720114-749797 [+] [orf19.344, orf19.345, BMT7, orf19.346, orf19.341]

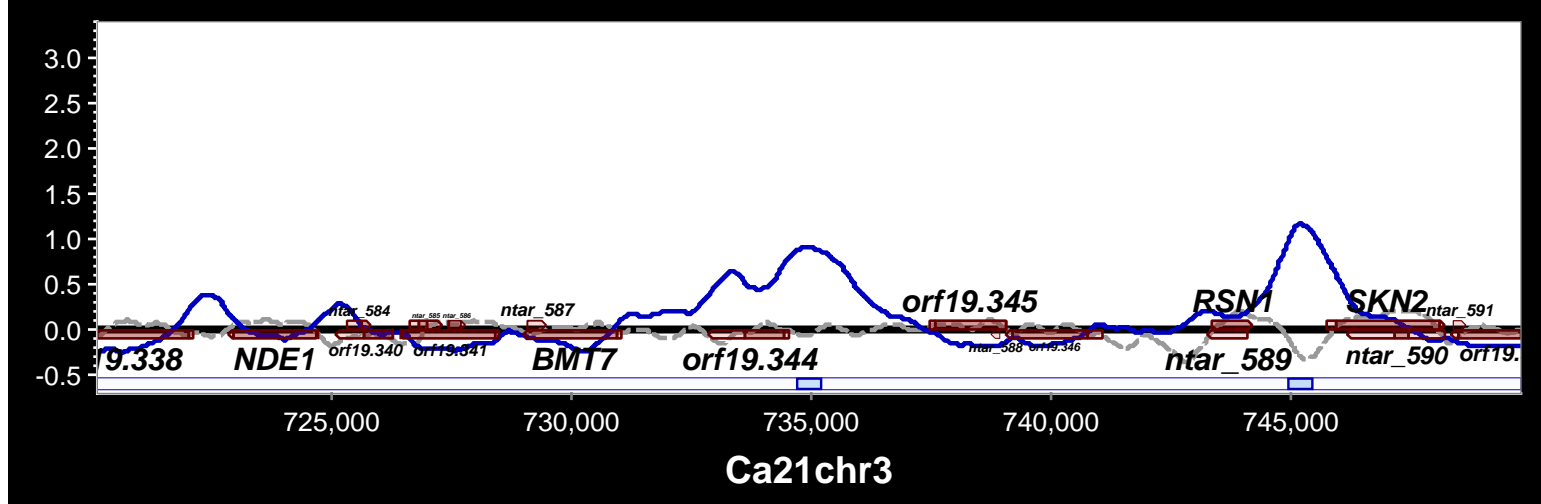

[0.906] Ca21chr7:430637-460320 [+] [CUP9, HSP90, RAD14, orf19.6518, orf19.6520]

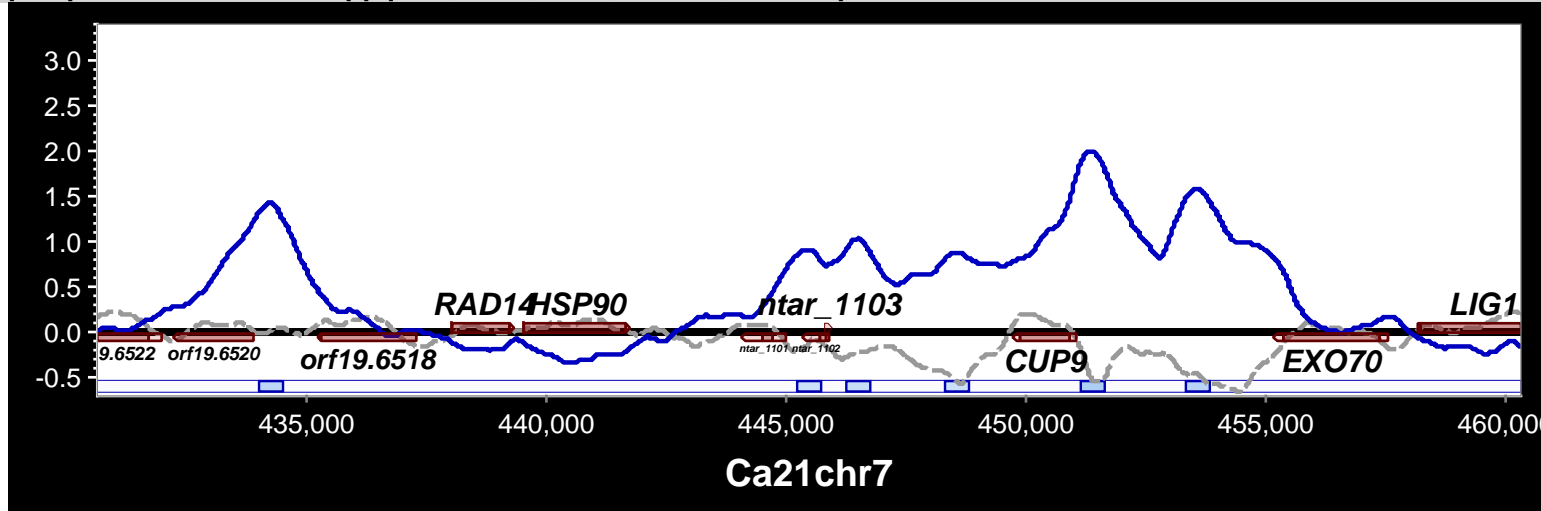

[0.903] Ca21chr1:31808-61491 [+] [orf19.6077, orf19.6076, POL93, RFC52, orf19.6075]

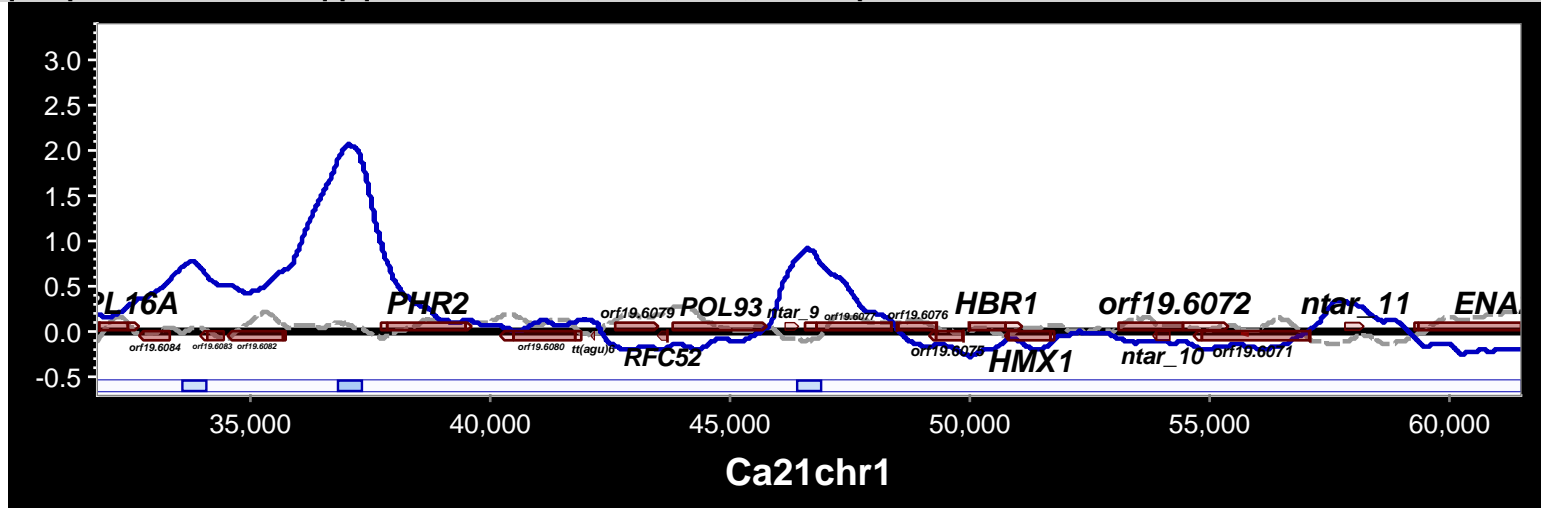

[0.9] Ca21chr3:865586-895269 [+] [orf19.5866, WSC1, orf19.5865, URK1, orf19.5869]

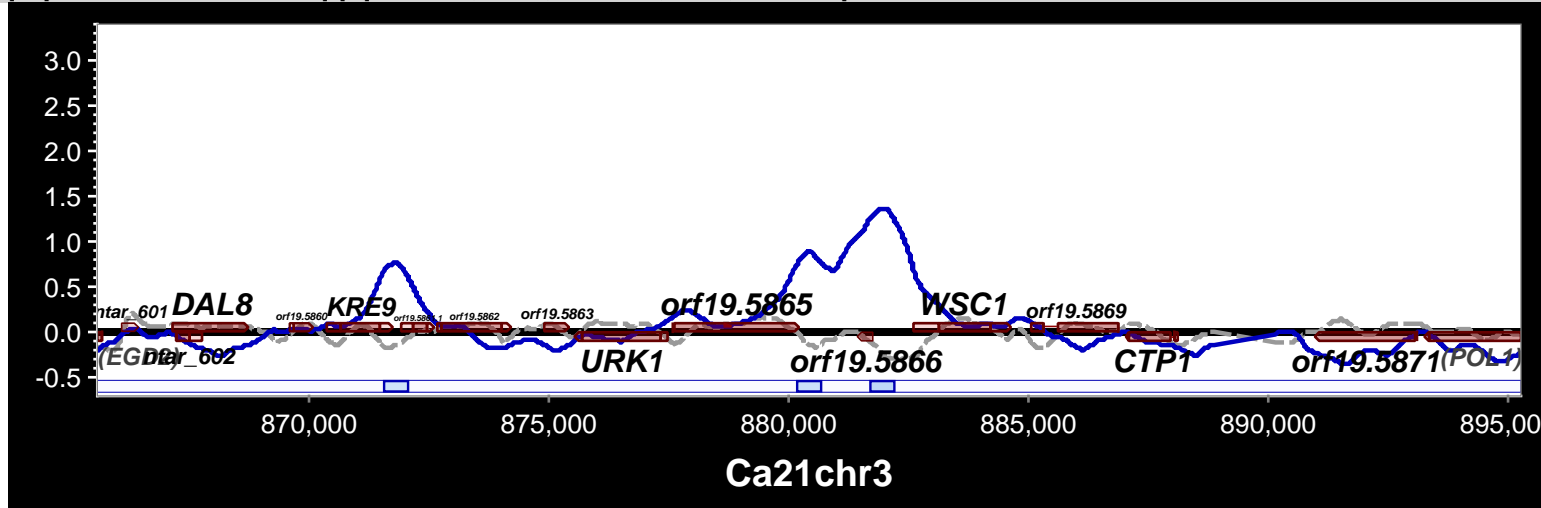

[0.896] Ca21chr4:1509829-1539512 [+] [CZF1, CCT6, orf19.3125, orf19.3128, orf19.3124]

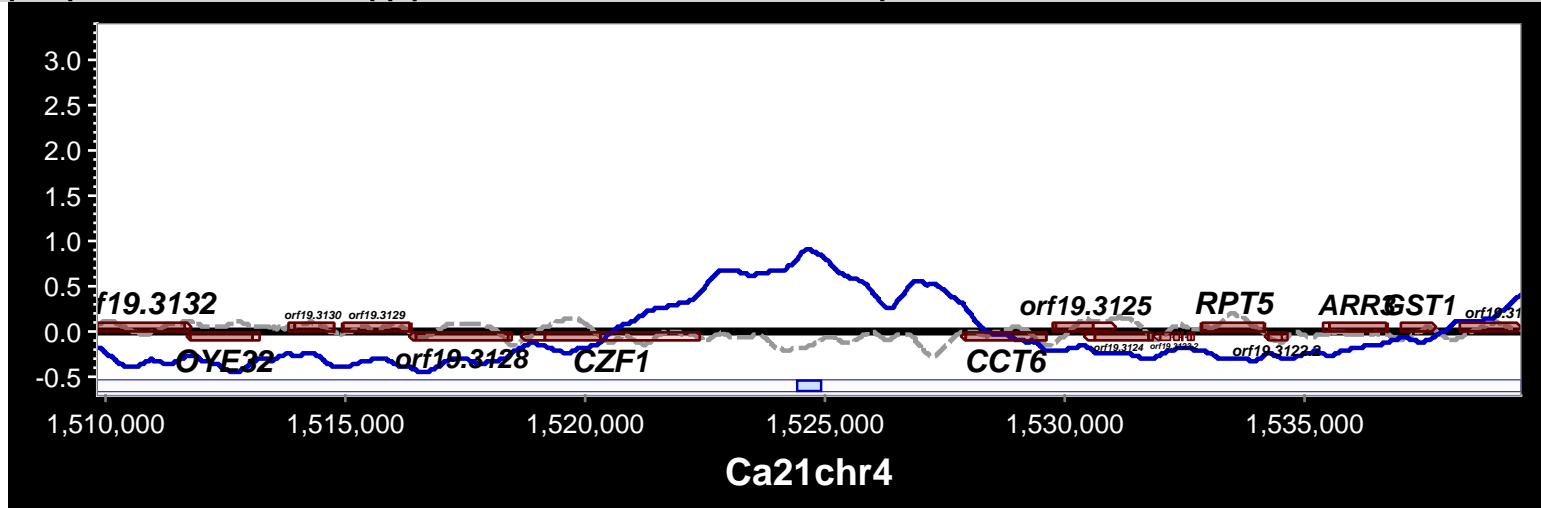

[0.894] Ca21chr1:606520-636203 [+] [orf19.2989, XOG1, orf19.2988, orf19.2987, orf19.2986]

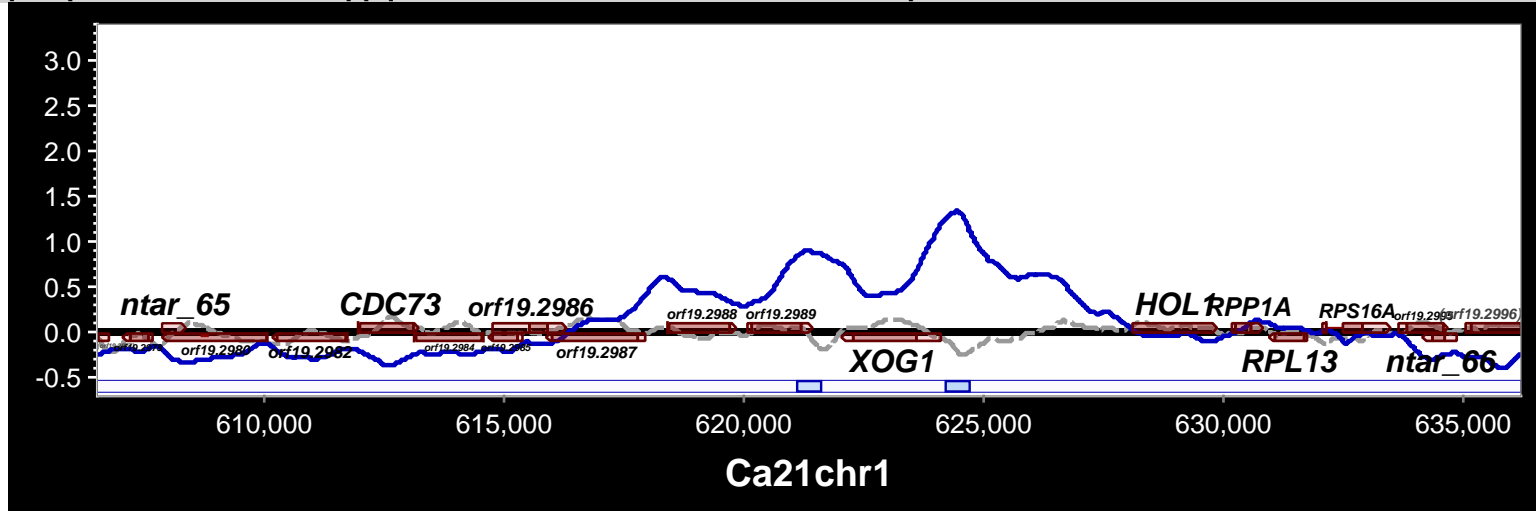

[0.894] Ca21chr6:1003847-1033530 [+] [HXK1, NAG6, orf19.2150, orf19.2149, NAG1]

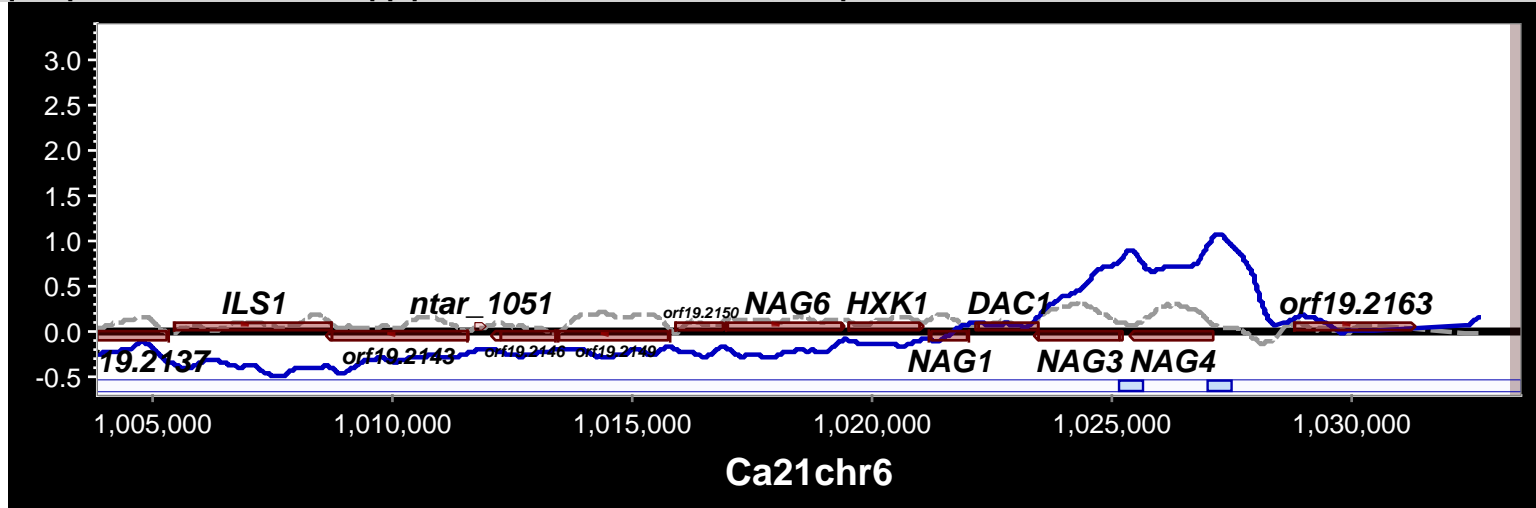

[0.893] Ca21chr2:1800782-1830465 [+] [orf19.215, orf19.216, orf19.213, orf19.216.1, VPS28]

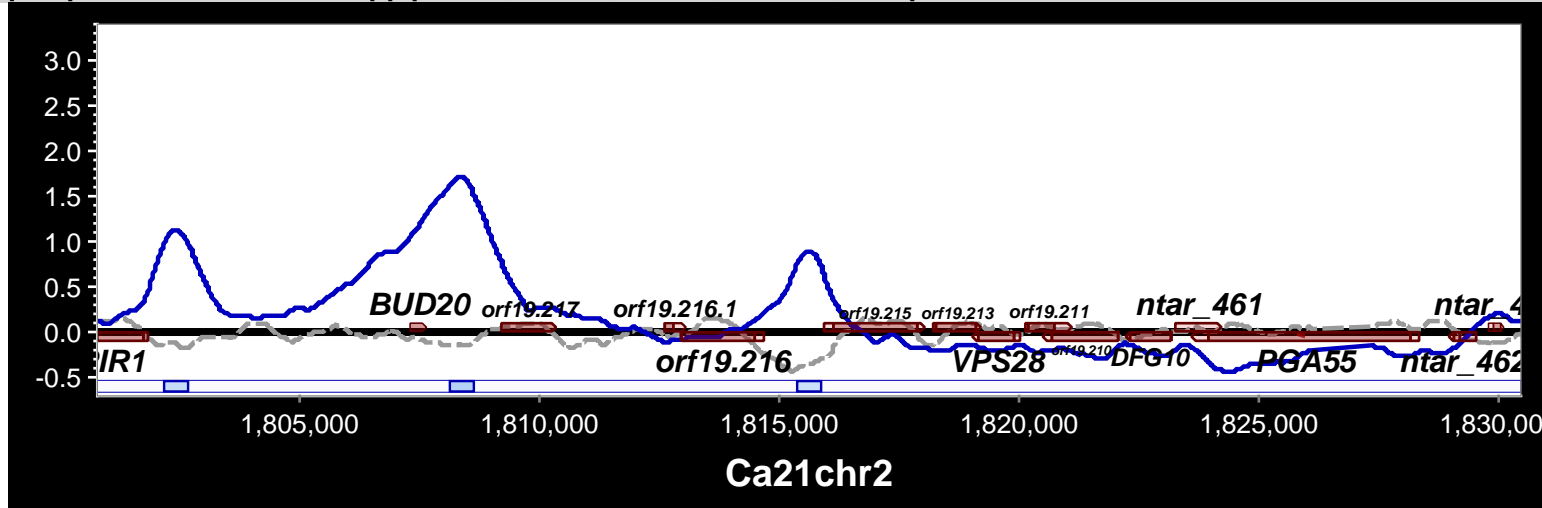

[0.893] Ca21chr4:116017-145700 [+] [orf19.4166, orf19.4167, orf19.4164, orf19.4168, orf19.4169]

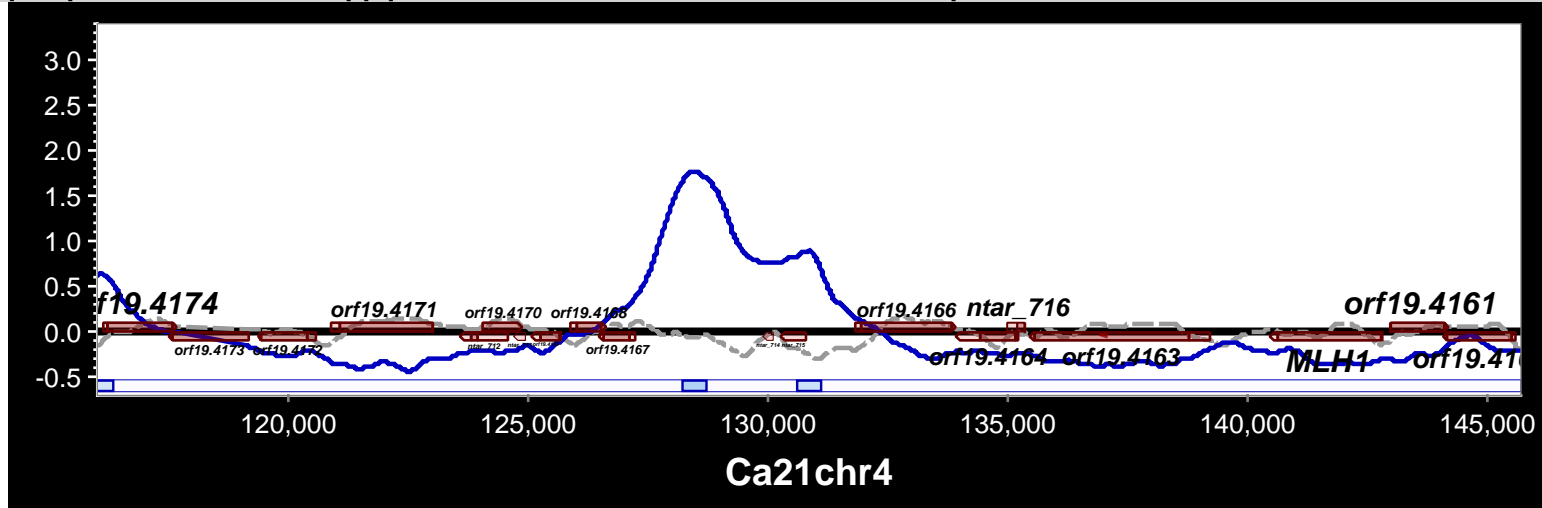

[0.893] Ca21chr5:897944-927627 [+] [SUI1, CDS1, orf19.1281, CKS1, MEC1]

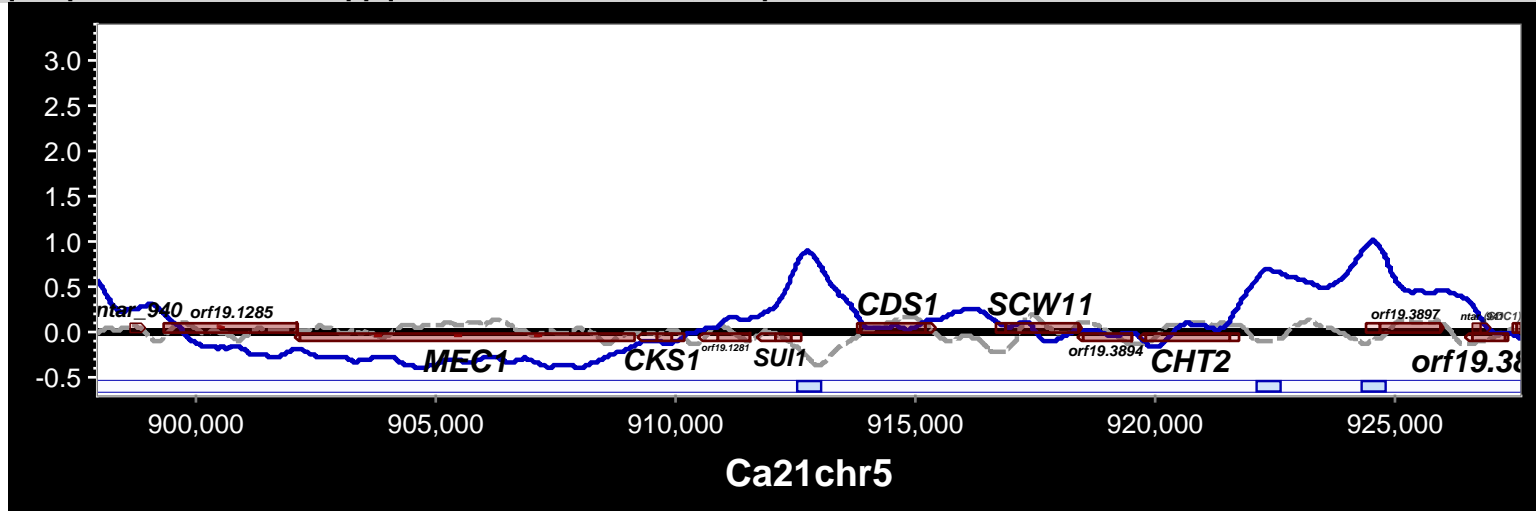

[0.887] Ca21chr4:508379-538062 [+] [RGT1, orf19.2748, orf19.2746, orf19.2749, orf19.2745]

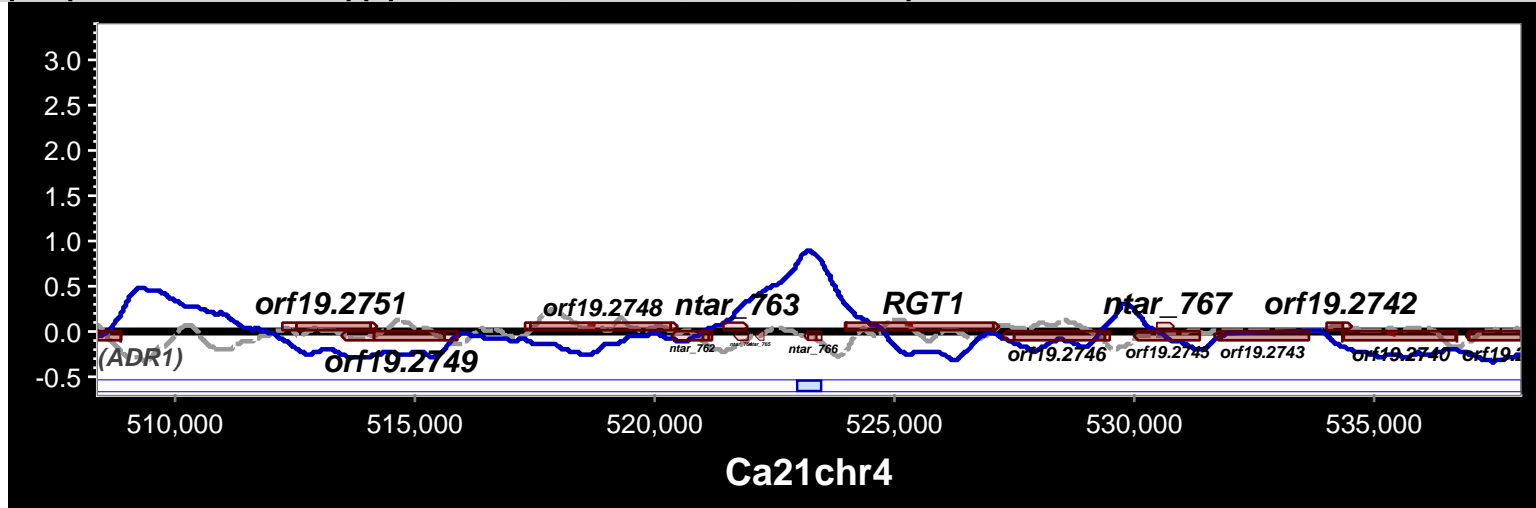

[0.879] Ca21chr7:433720-463403 [+] [CUP9, EXO70, HSP90, LIG1, RAD14]

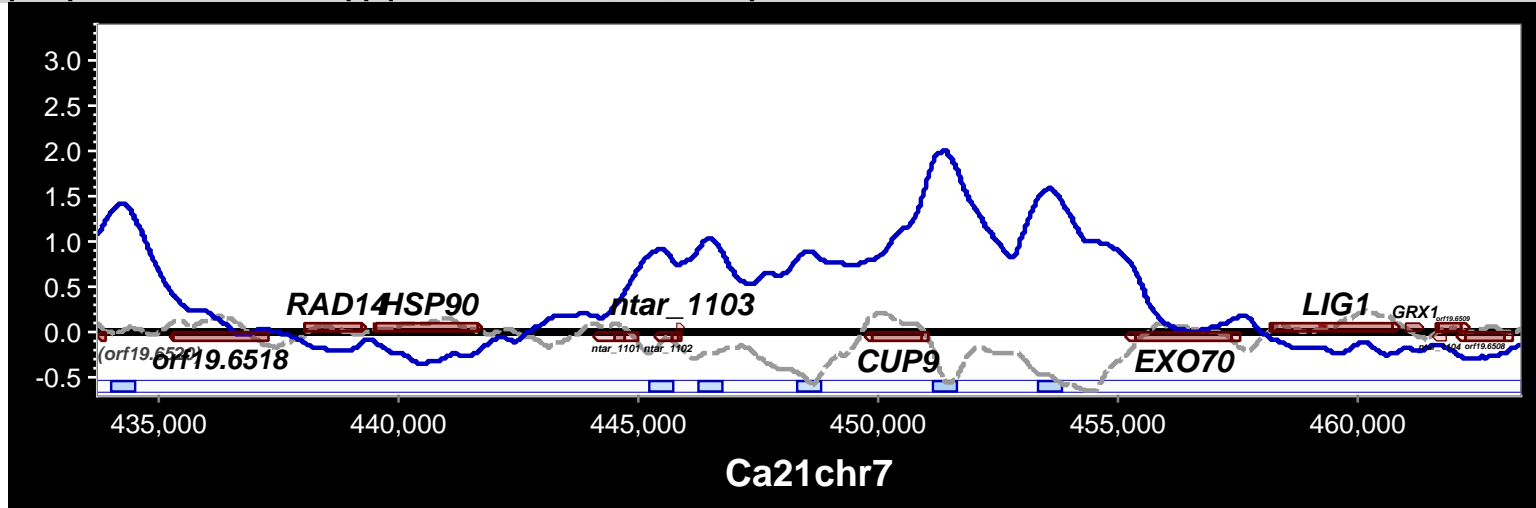

[0.876] Ca21chr6:653726-683409 [+] [MDR1, BMT6, orf19.5605, orf19.5606, orf19.5601]

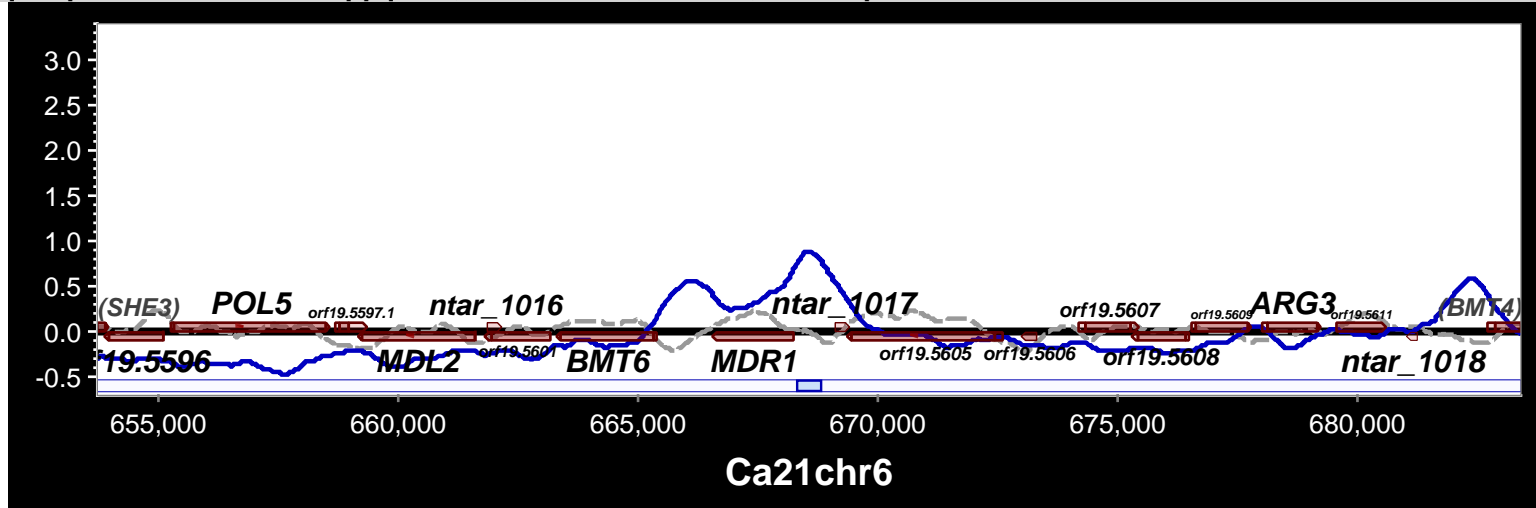

[0.873] Ca21chr2:1825983-1855666 [+] [orf19.204, STB3, CDC47, orf19.201, orf19.206]

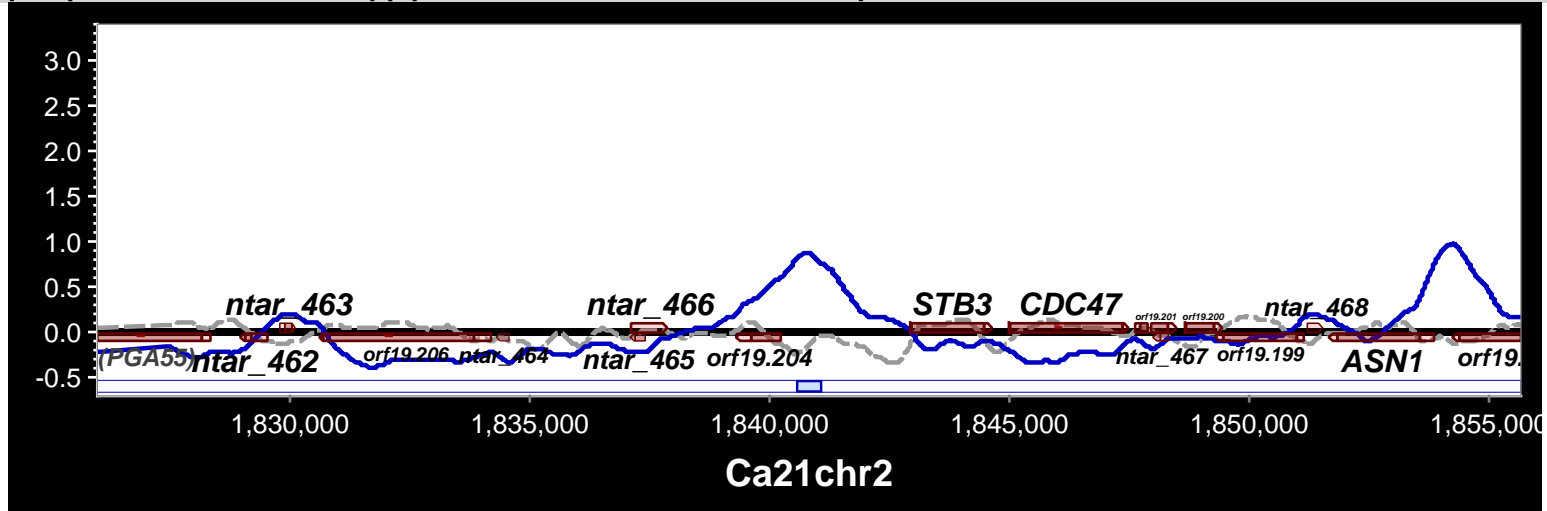

[0.873] Ca21chr4:224703-254386 [+] [orf19.4672, CAS5, BMT9, AAT22, CRD2]

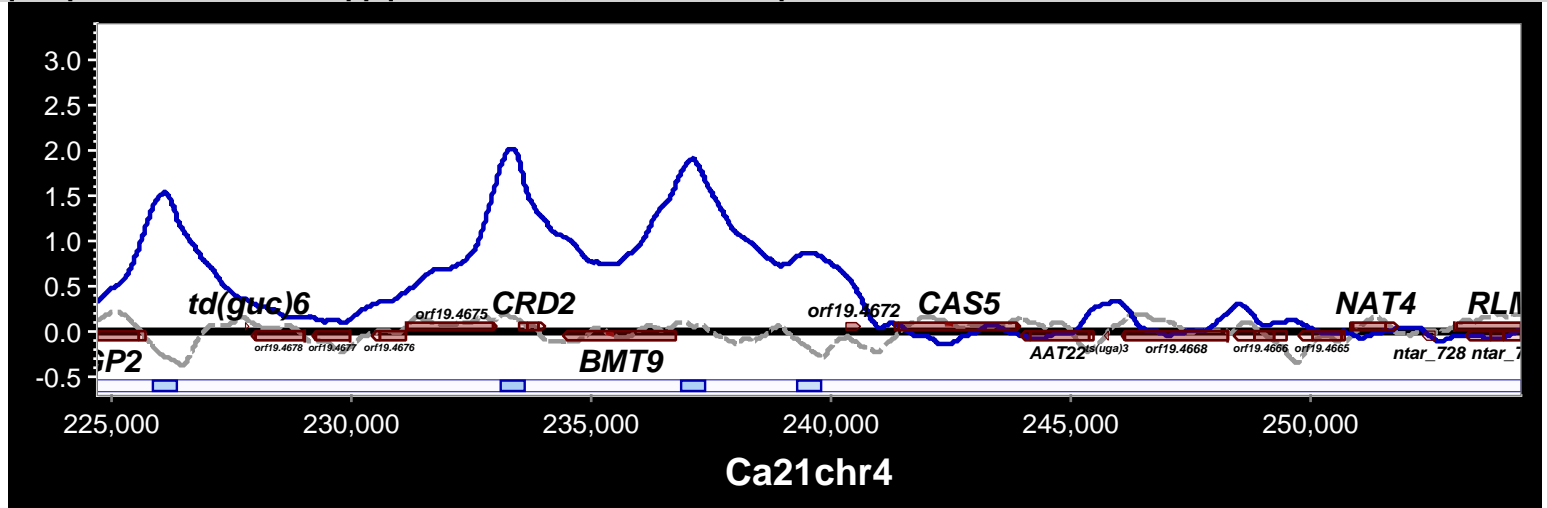

[0.873] Ca21chr4:547357-577040 [+] [orf19.2726, GRX3, orf19.2725, orf19.2728, orf19.2730]

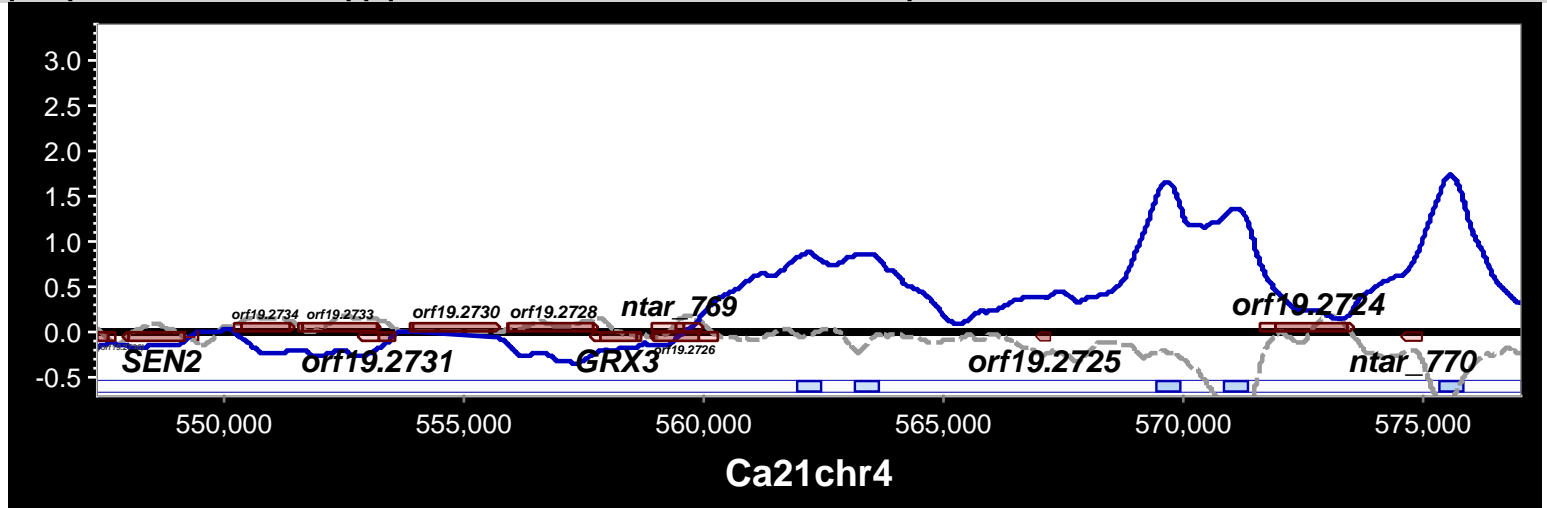

[0.871] Ca21chr5:759326-789009 [+] [orf19.2638, orf19.2637, tE(UUC)5, orf19.2639, orf19.6654]

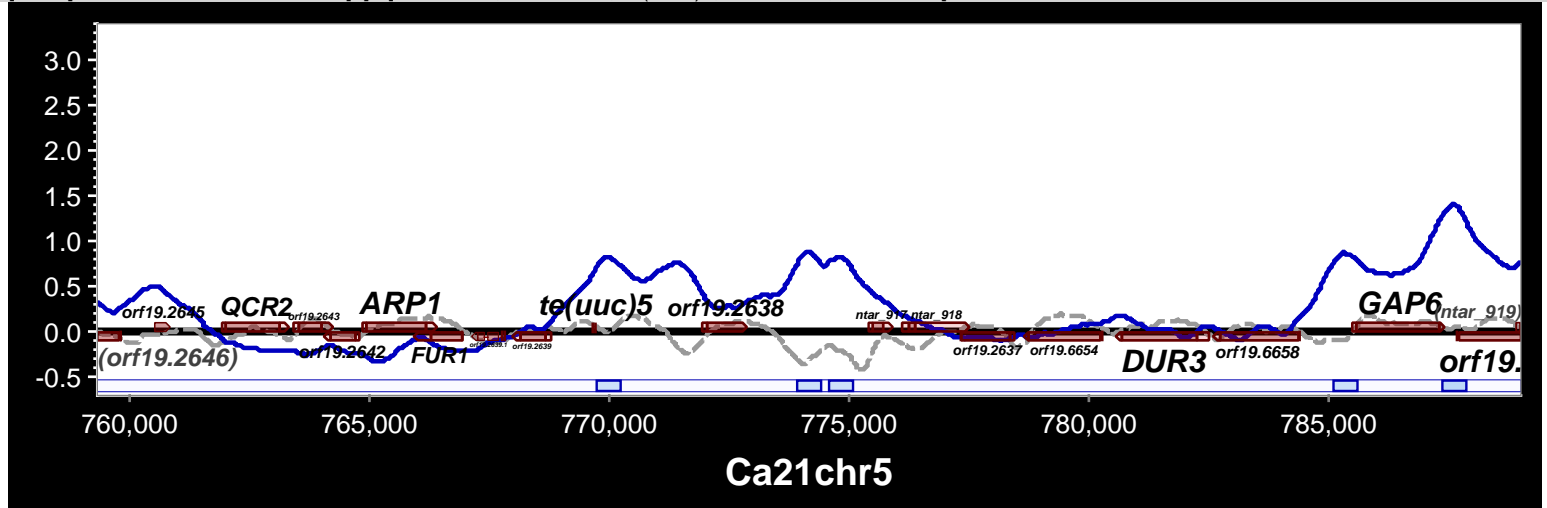

[0.866] Ca21chr1:2146117-2175800 [+] [HCM1, TFA1, orf19.4850, BUD31, tS(CGAI)1]

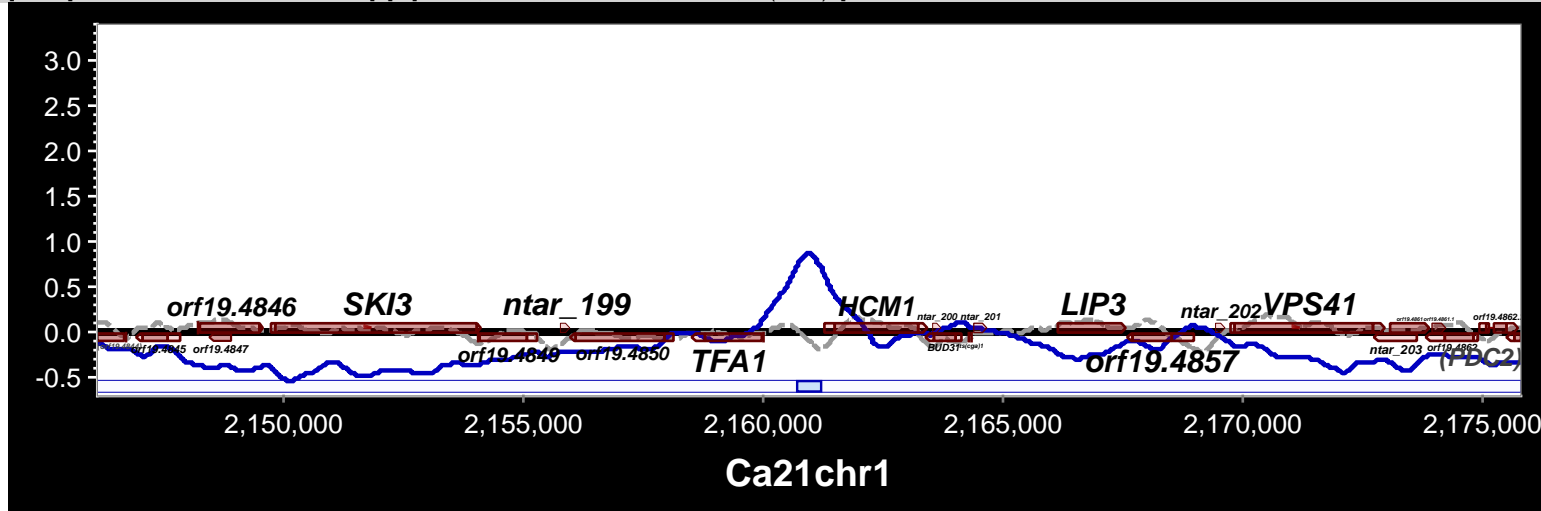

[0.866] Ca21chr3:442956-472639 [+] [RPL12, orf19.1634, STE50, orf19.1637, UTP4]

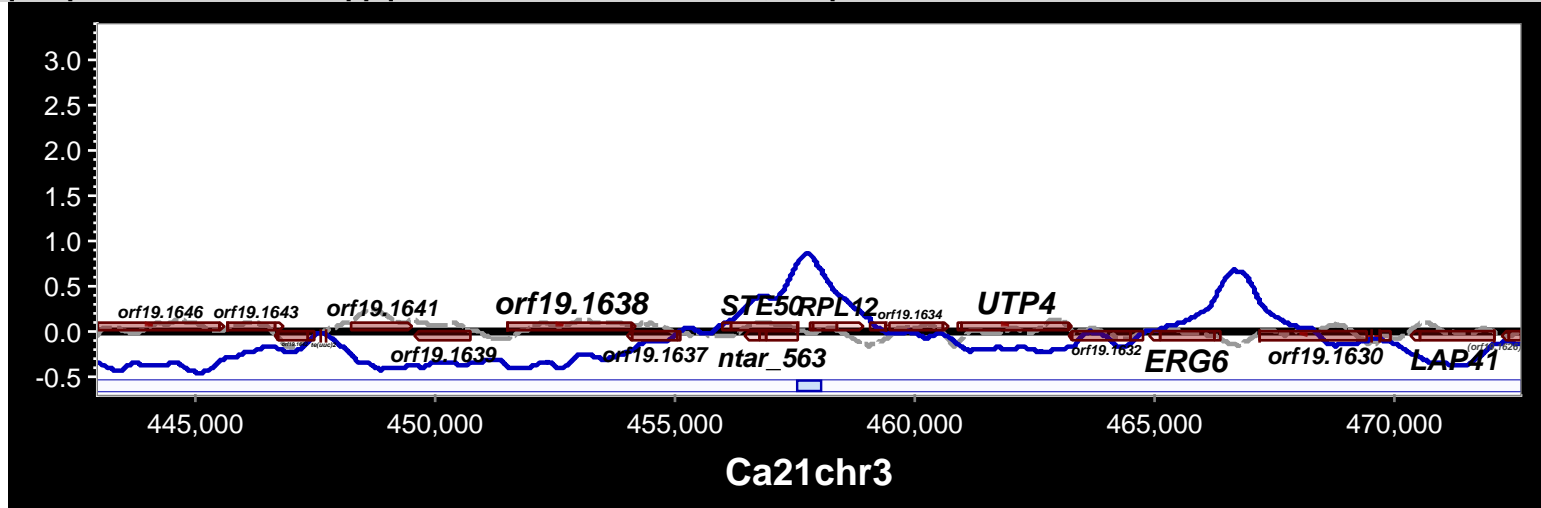

[0.865] Ca21chr1:1307563-1337246 [+] [orf19.1821, UME6, orf19.1823, PGA50, orf19.1825]

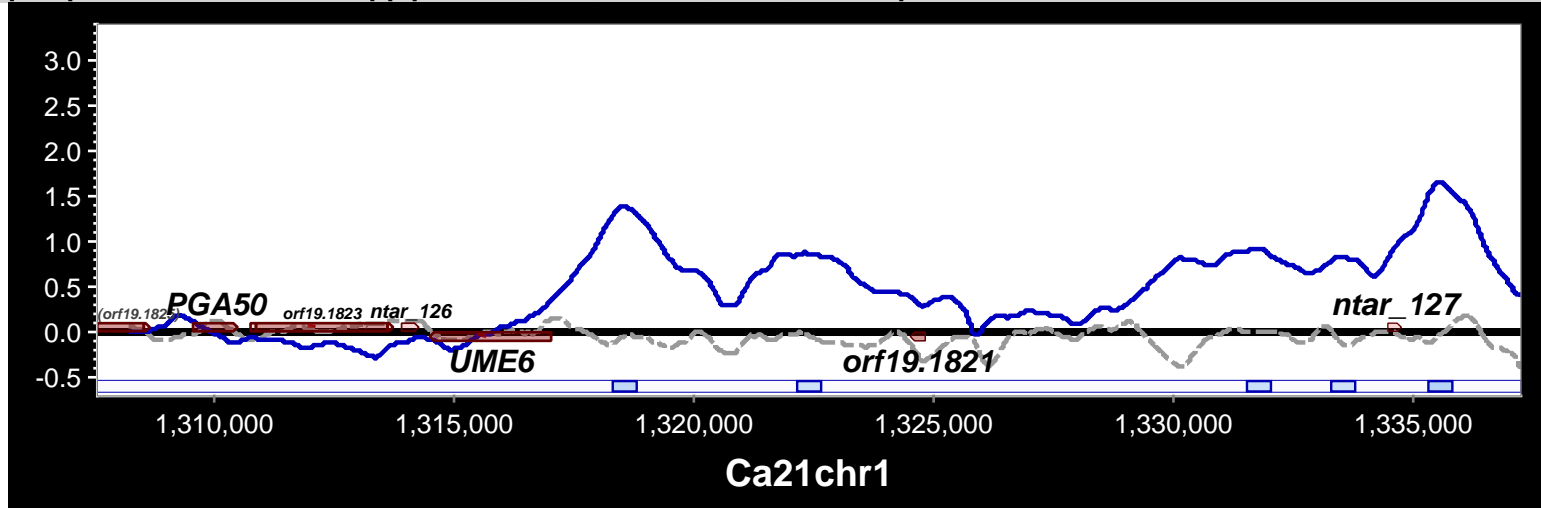

[0.865] Ca21chr2:734717-764400 [+] [RAD32, orf19.867, orf19.864, orf19.863, ADAEC]

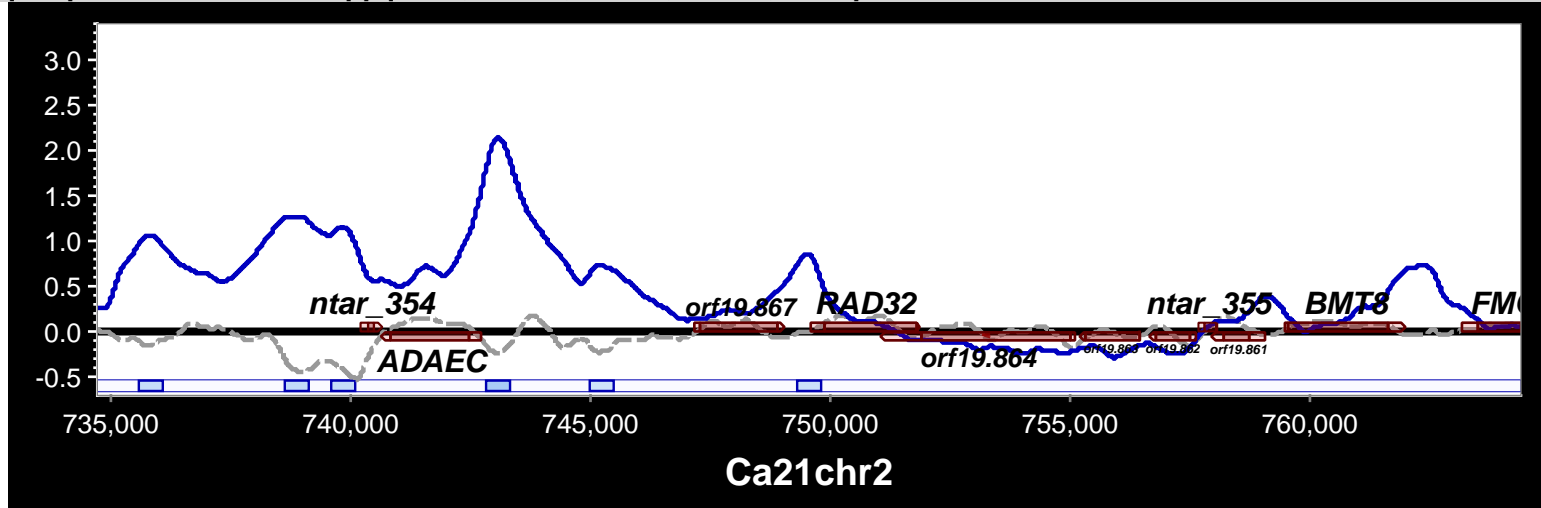



[0.864] Ca21chr5:770509-800192 [+] [GAP6, orf19.6658, DUR3, orf19.6660, orf19.6654]

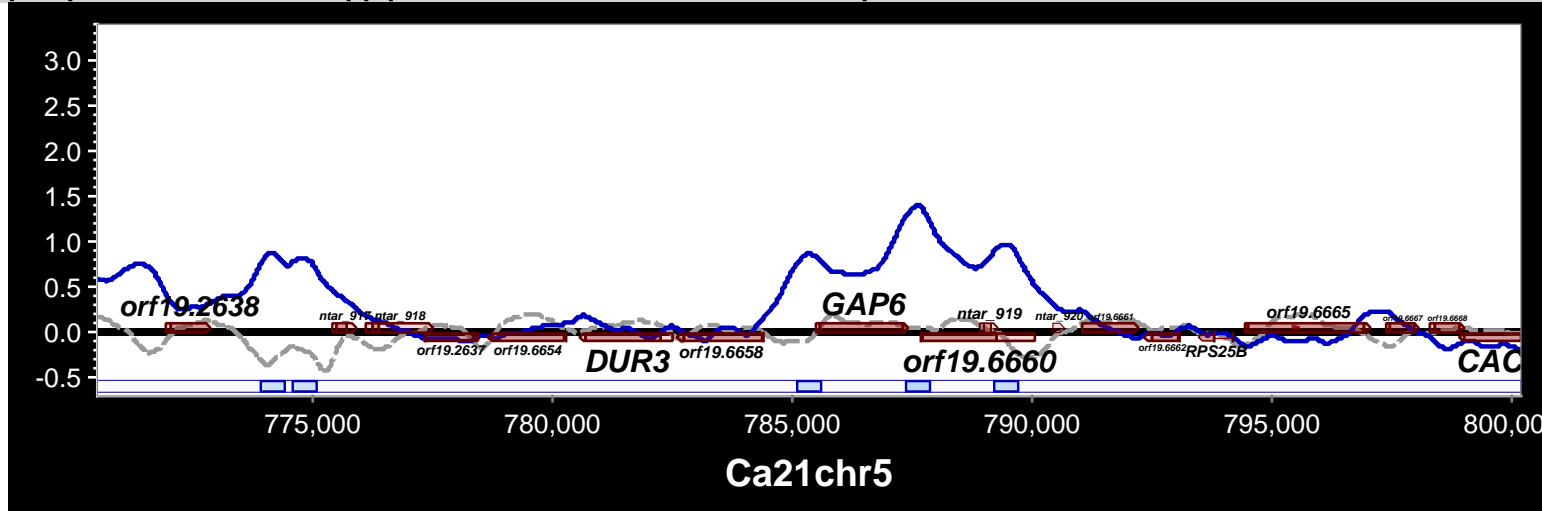

[0.863] Ca21chr4:879983-909666 [+] [AXL2, orf19.5291, orf19.5290, orf19.1430, orf19.5293]

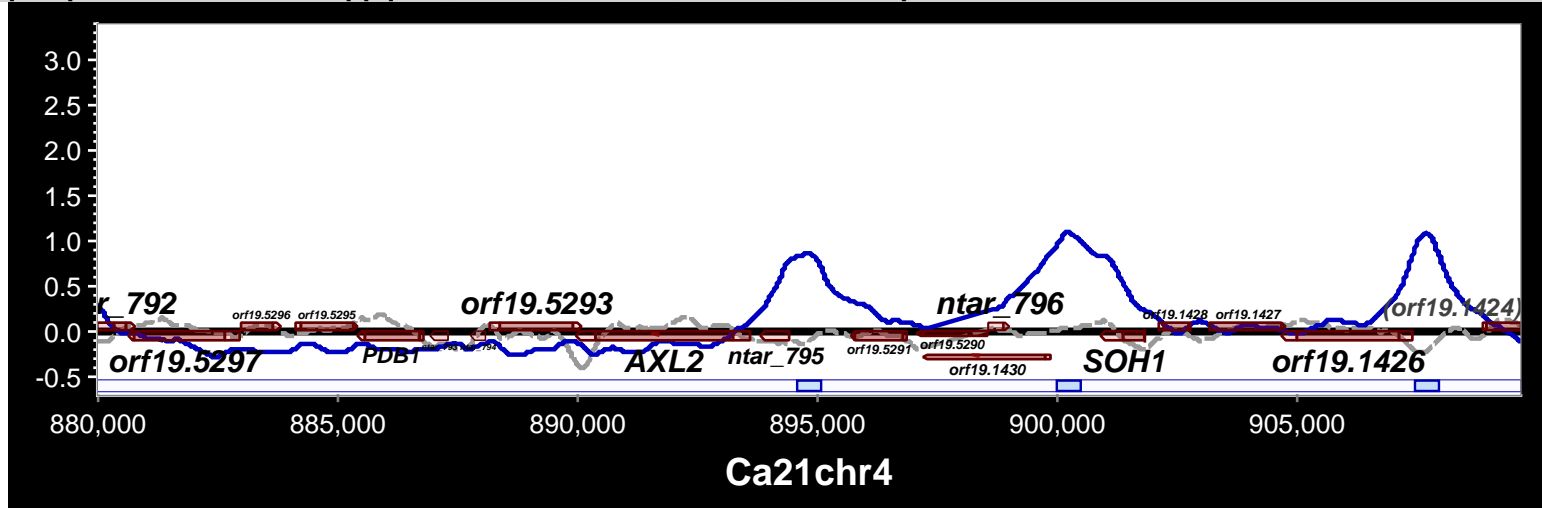

[0.863] Ca21chr5:287928-317611 [+] [CFL4, orf19.1933, orf19.1934, CFL5, orf19.1935]

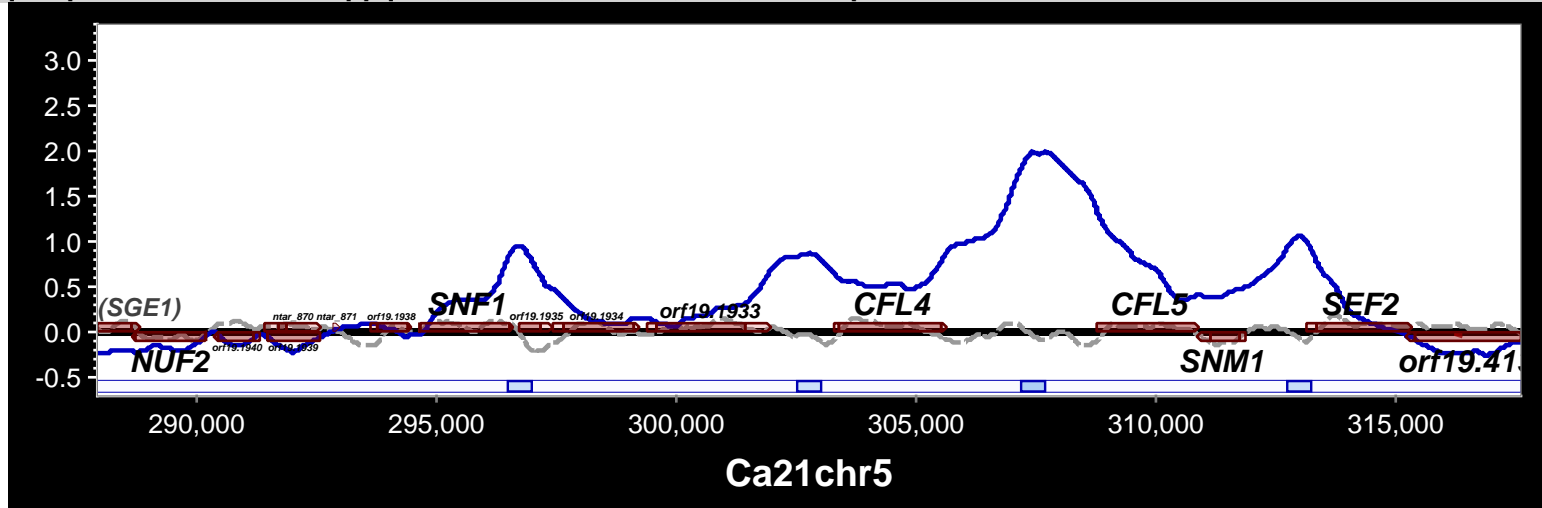

[0.86] Ca21chrR:1082613-1112296 [+] [tH(GUG)1, GLN1, orf19.645.1, orf19.647.3, HGT9]

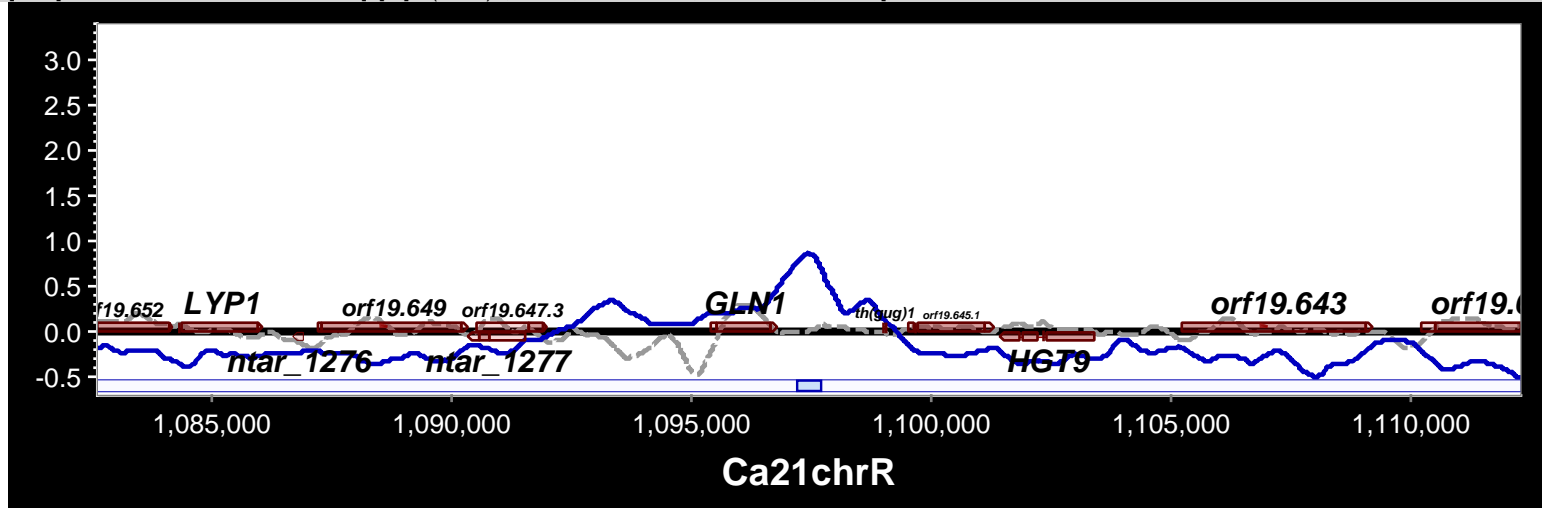

[0.859] Ca21chr4:548561-578244 [+] [orf19.2726, orf19.2725, GRX3, orf19.2728, orf19.2724]

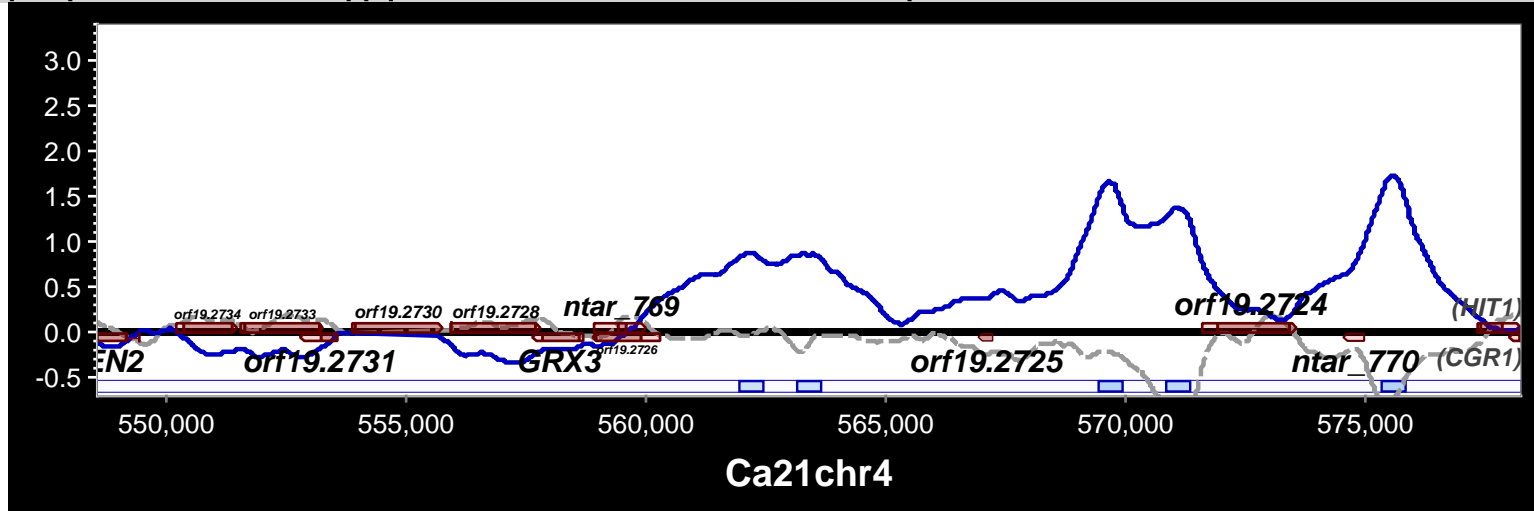

[0.856] Ca21chr3:1206055-1235738 [+] [orf19.6983, orf19.6984, TEA1, orf19.6982, tV(AAC)5]

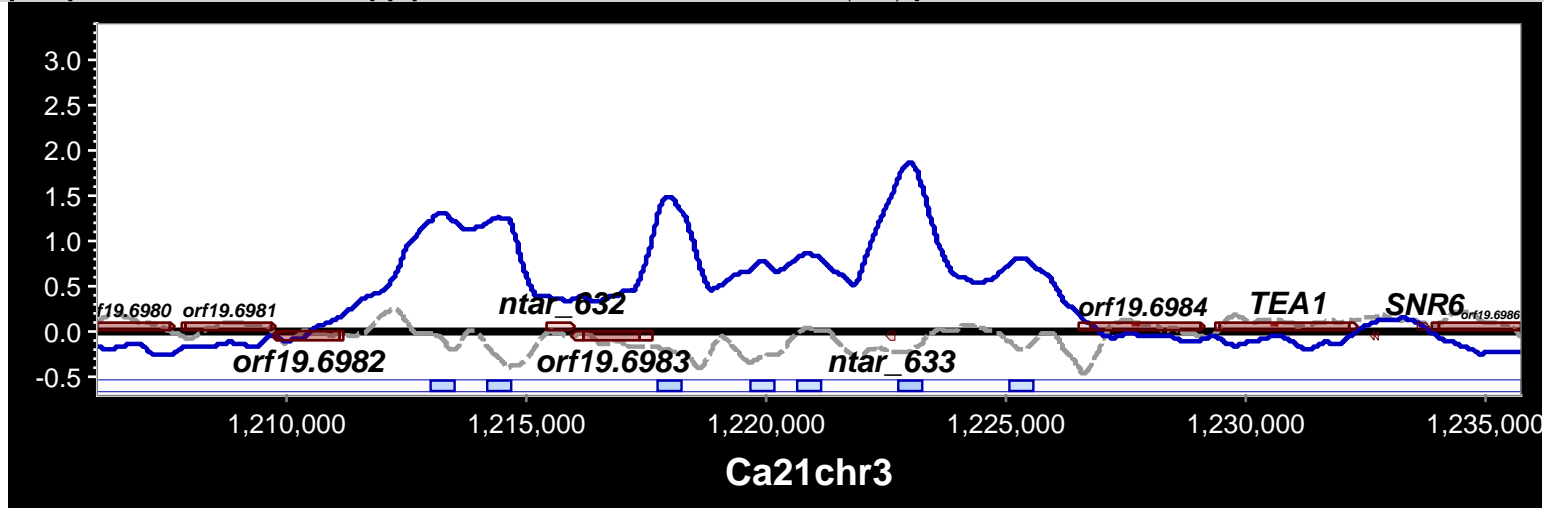

[0.856] Ca21chrR:762711-792394 [+] [CIT1, orf19.4394, DEM1, orf19.4395, orf19.4396]

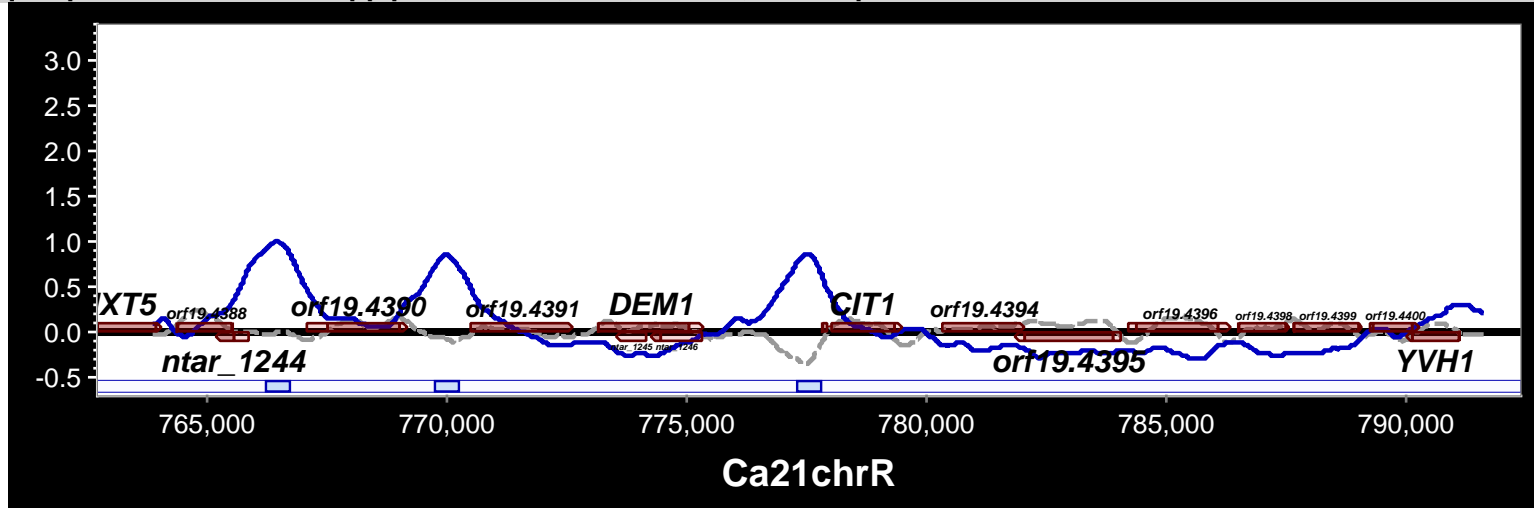

[0.85] Ca21chr6:764178-793861 [+] [CDC50, orf19.5735.3, ALS5, NOG2]

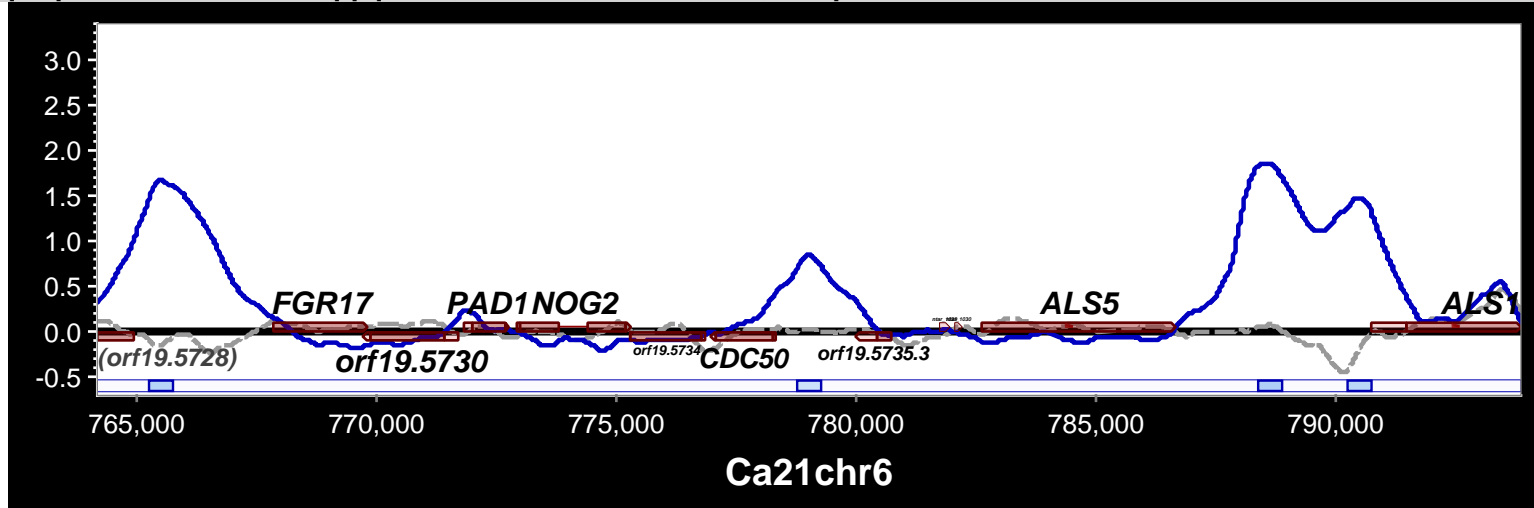

[0.849] Ca21chr2:1864979-1894662 [+] [MIT1, orf19.4078, MET10, SLP2, orf19.4080]

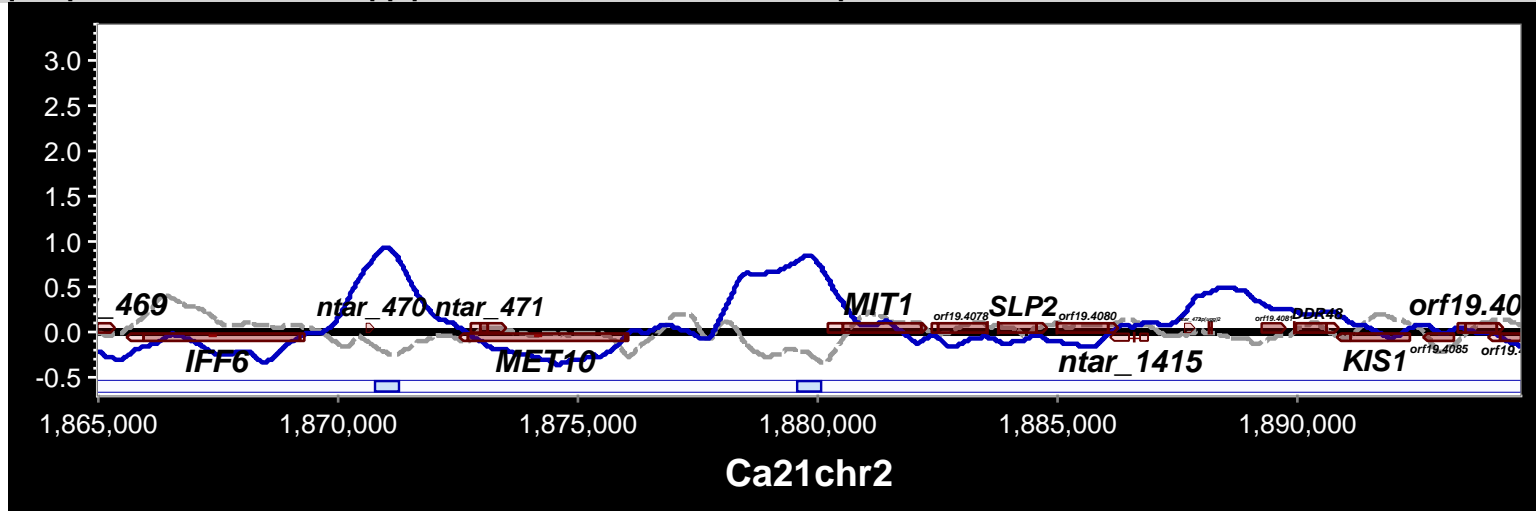

[0.844] Ca21chrR:879453-909136 [+] [orf19.474, orf19.475, orf19.477, TPO4, orf19.478]

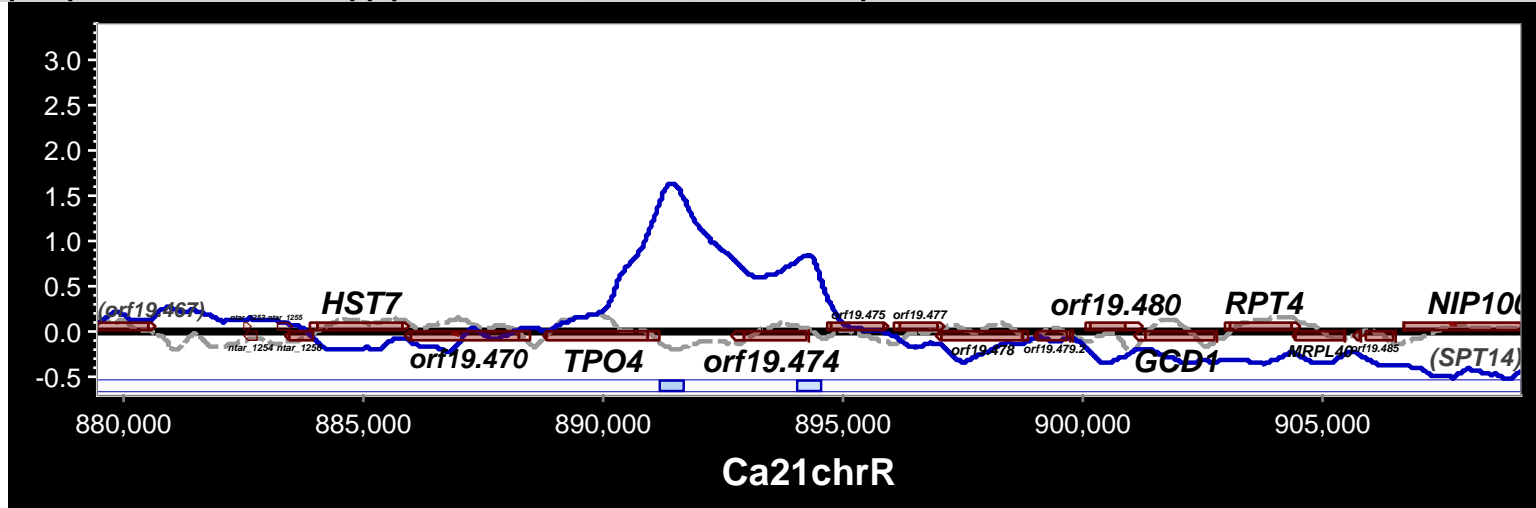

[0.842] Ca21chr7:43449-73132 [+] [orf19.7084, orf19.7085, DCC1, orf19.7086, orf19.7082]

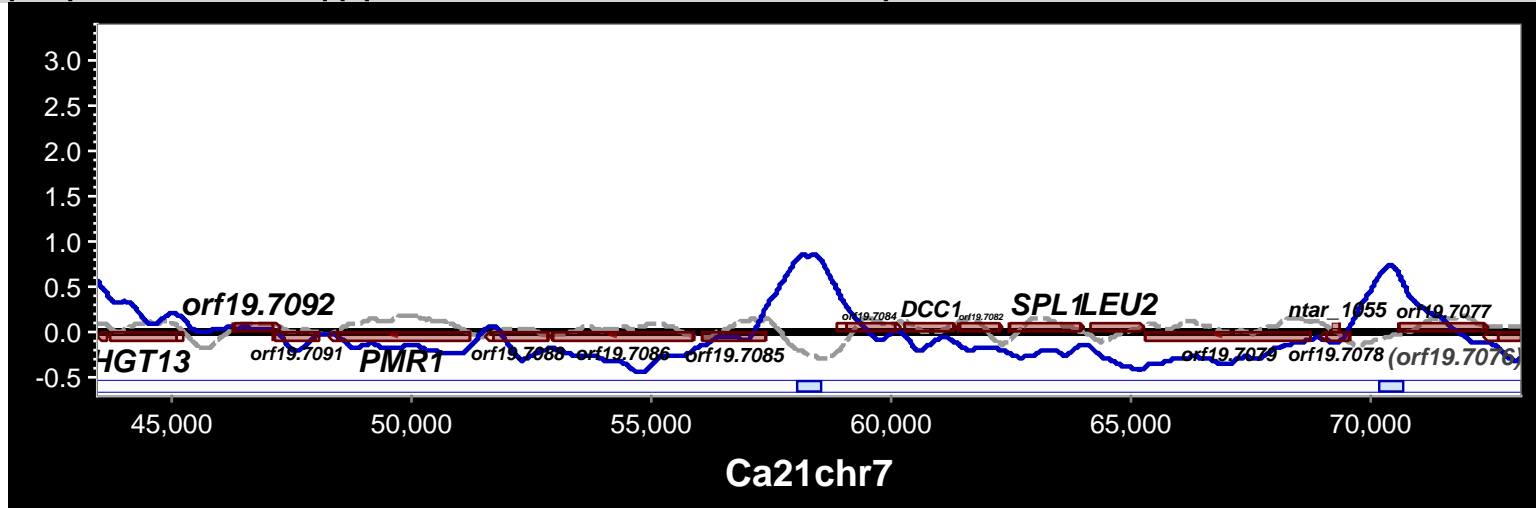

[0.842] Ca21chrR:357009-386692 [+] [MET6, orf19.2552, orf19.2553, orf19.2549, orf19.2547]

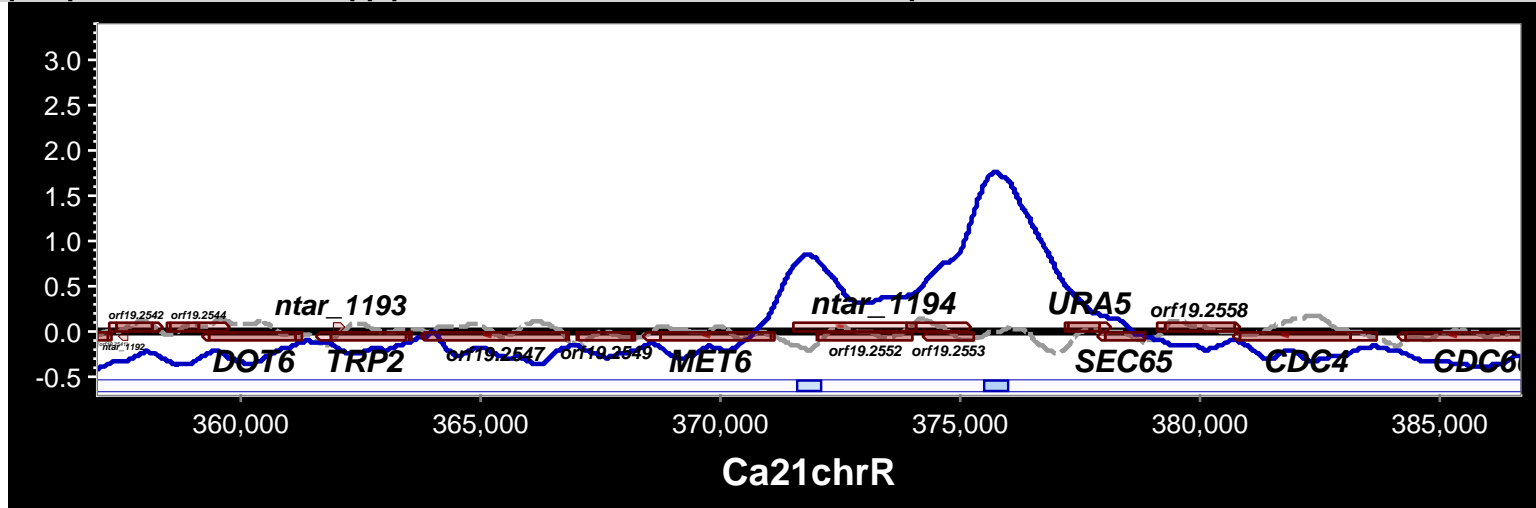

[0.842] Ca21chrR:2156973-2186656 [+] [FAA4, orf19.7593, orf19.7594, orf19.7590, orf19.7595]

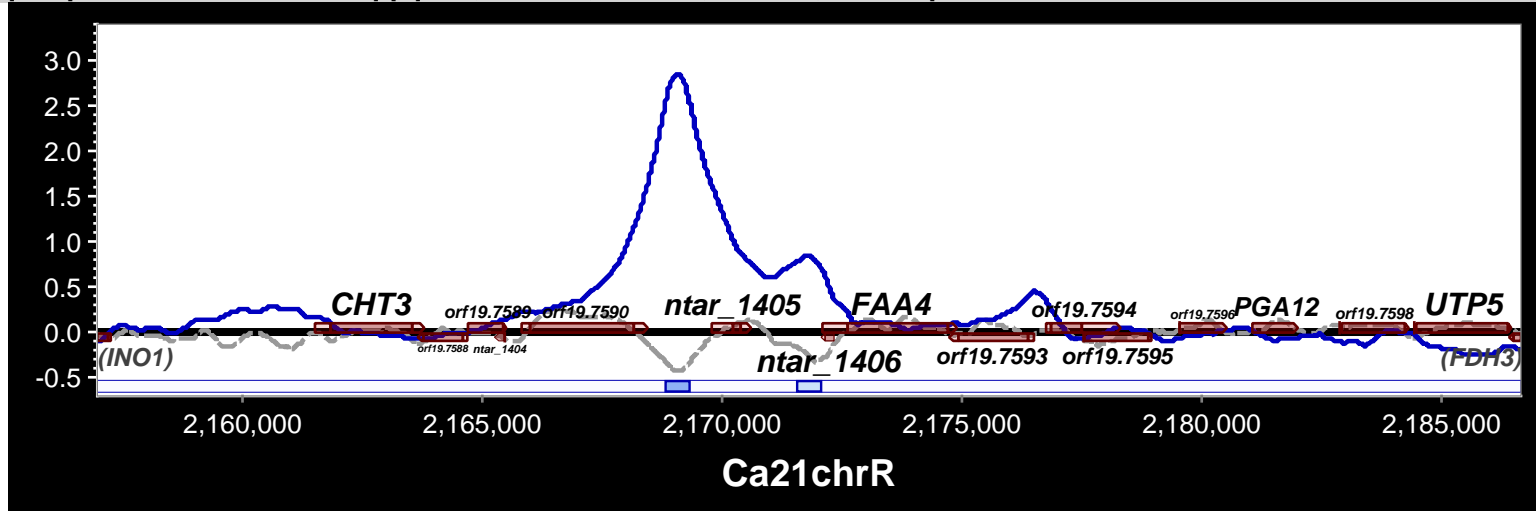

[0.84] Ca21chr2:1134472-1164155 [+] [orf19.6874, VPS35, tS(AGA)4, orf19.6873.1, RPS8A]

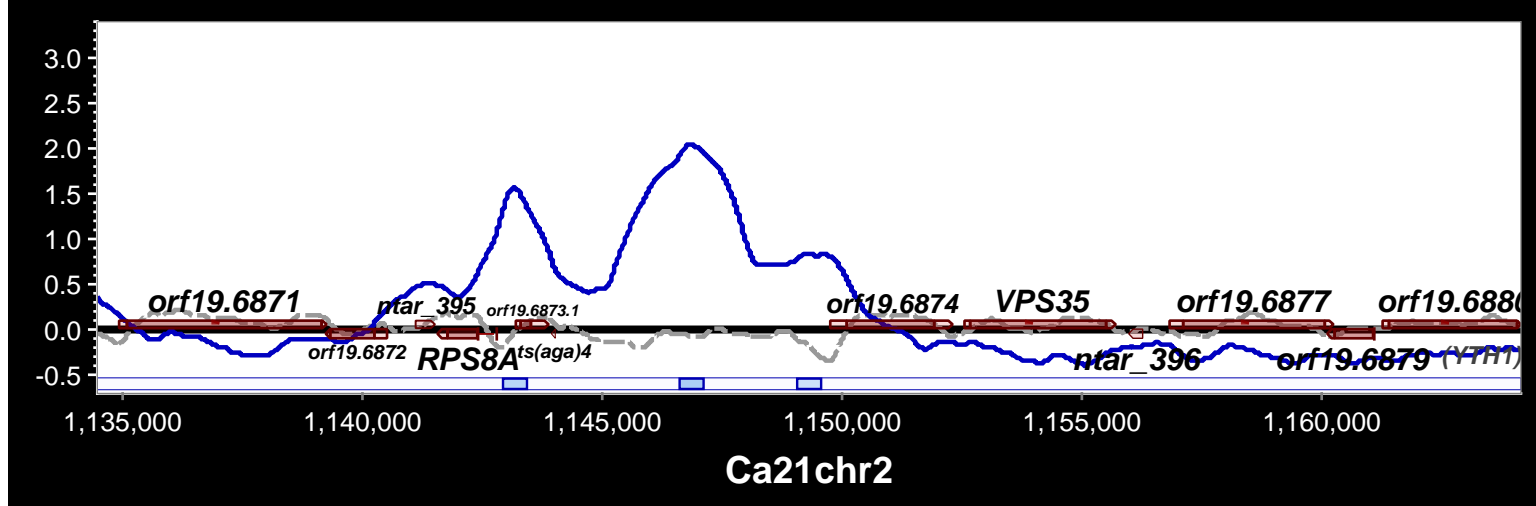

[0.837] Ca21chr4:701193-730876 [+] [MOH1, orf19.3368, orf19.3367, orf19.3366.1, DOT4]

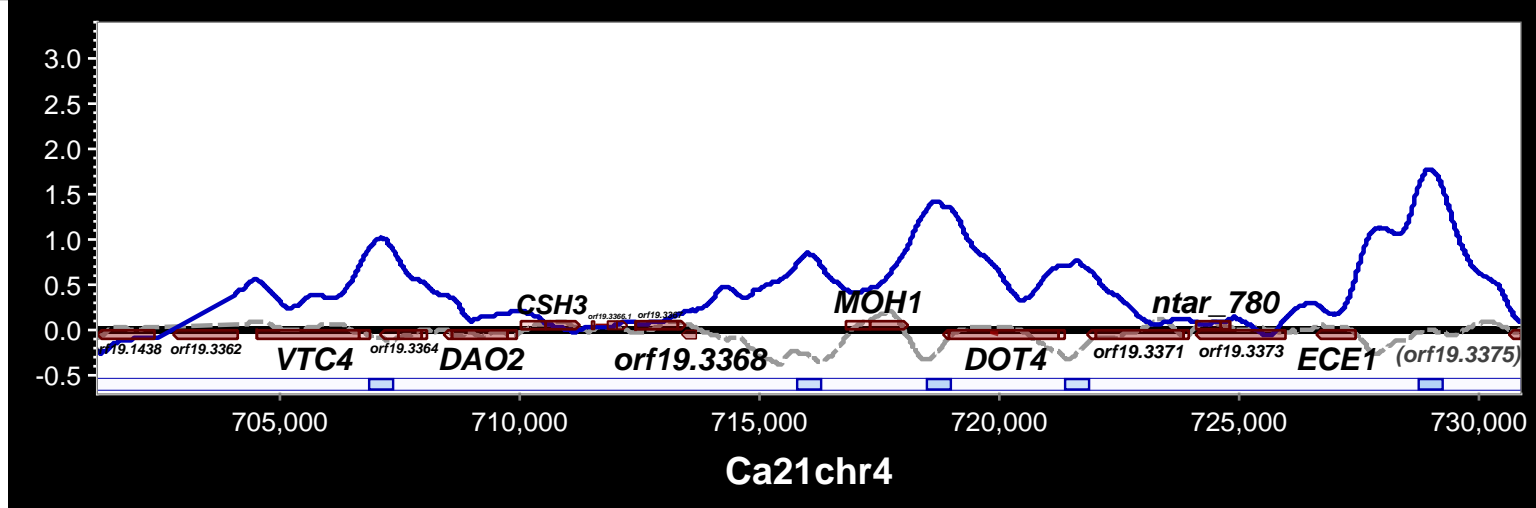

[0.837] Ca21chrR:755159-784842 [+] [orf19.4391, orf19.4390, DEM1, orf19.4388, CIT1]

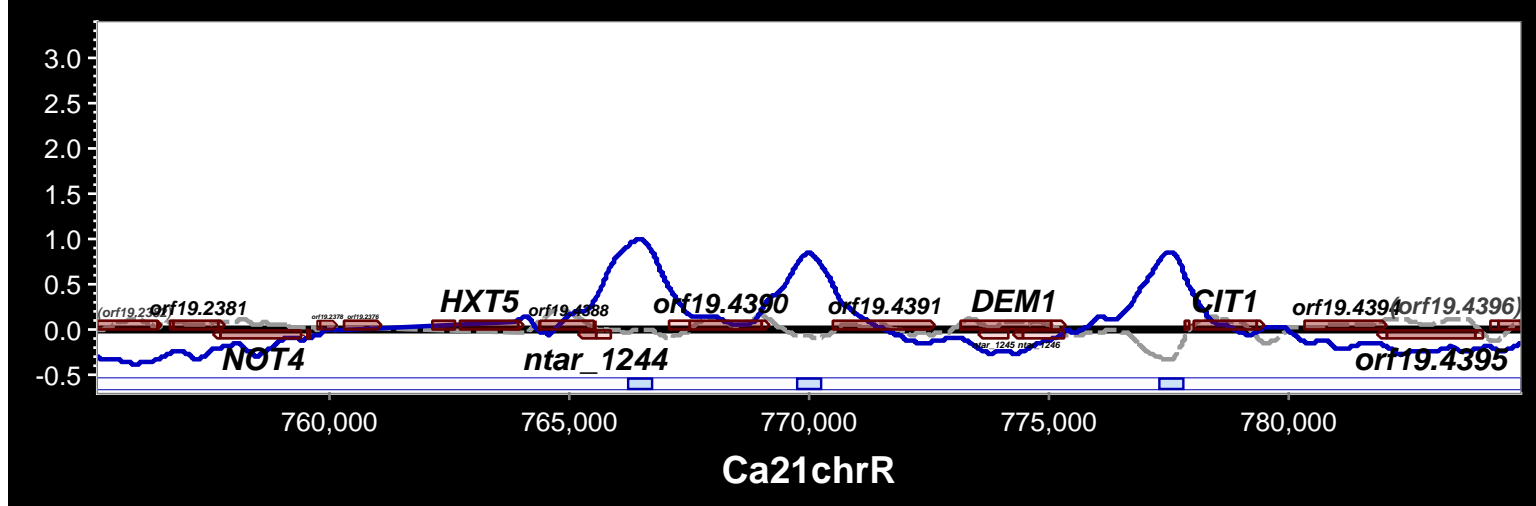

[0.836] Ca21chrR:1-29684 [+] [INO2, orf19.7538, BNR1, orf19.7539.1, tL(CAA)6]

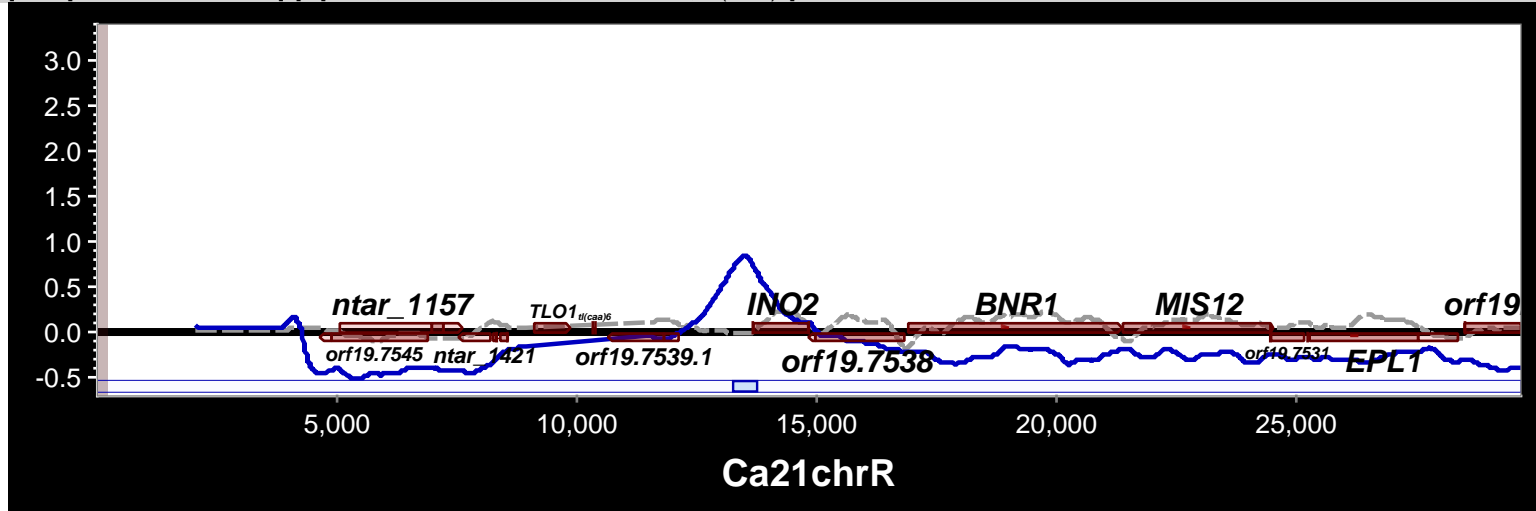

[0.831] Ca21chr1:1318698-1348381 [+] [orf19.177, orf19.6280, orf19.1821, orf19.6277]

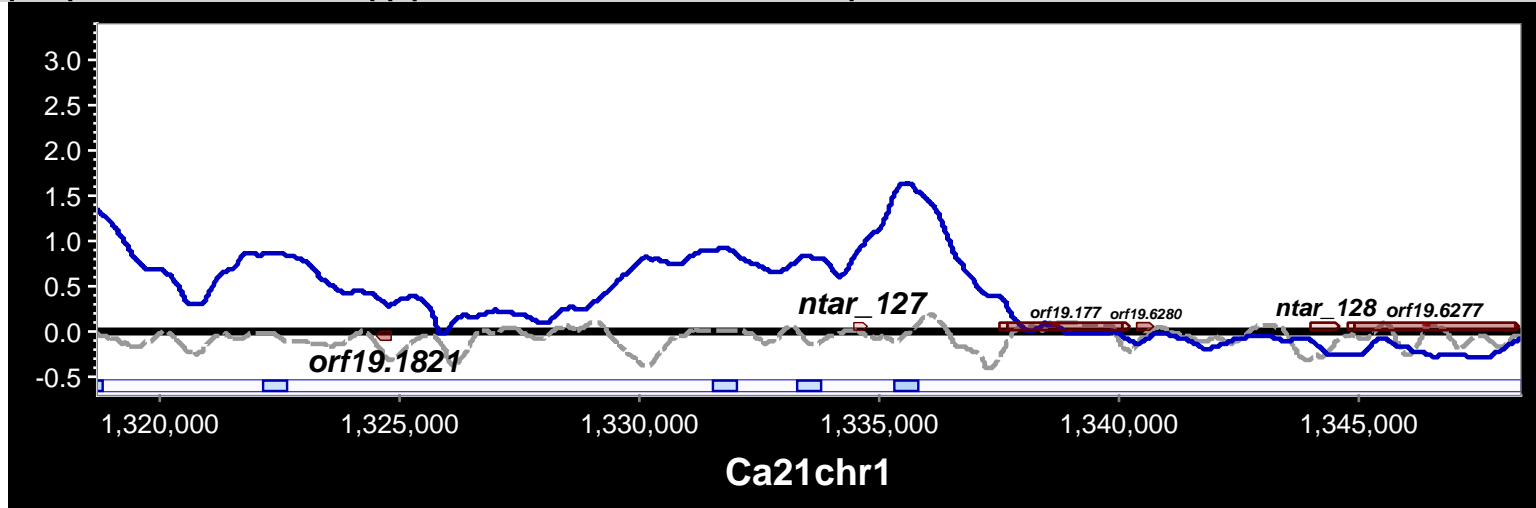

[0.831] Ca21chr1:2477025-2506708 [+] [RPL37B, orf19.668, orf19.666, NEP1, PRM1]

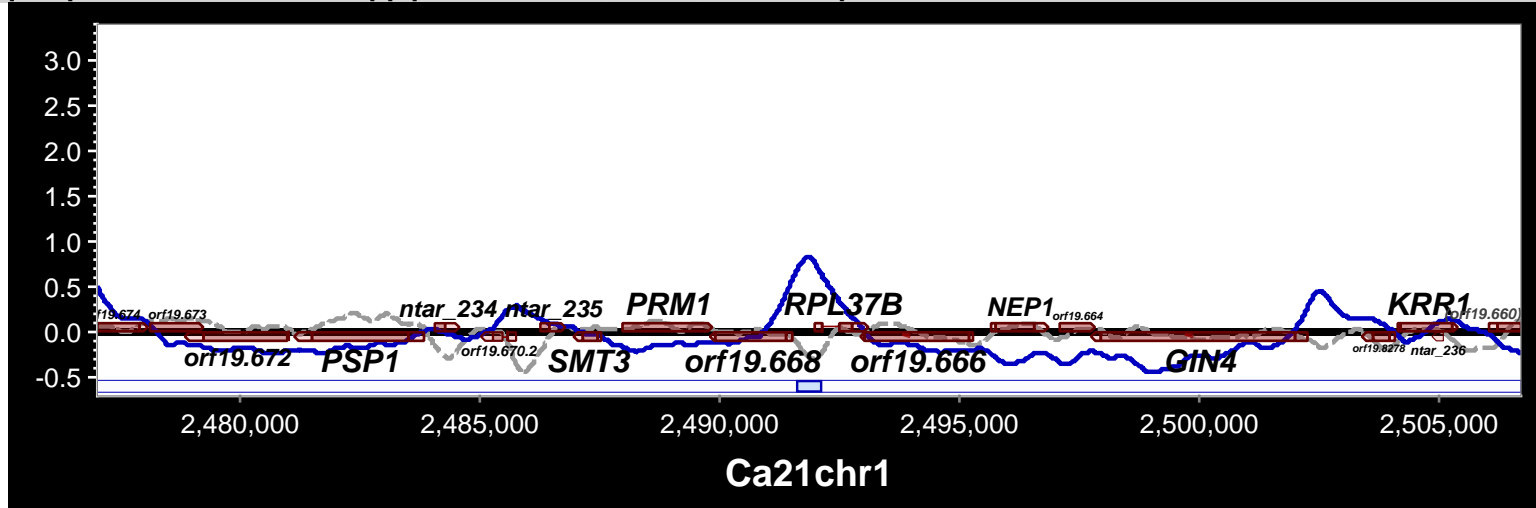

[0.831] Ca21chr4:426668-456351 [+] [ZCF25, orf19.4567, orf19.4566, orf19.4569, orf19.4570]

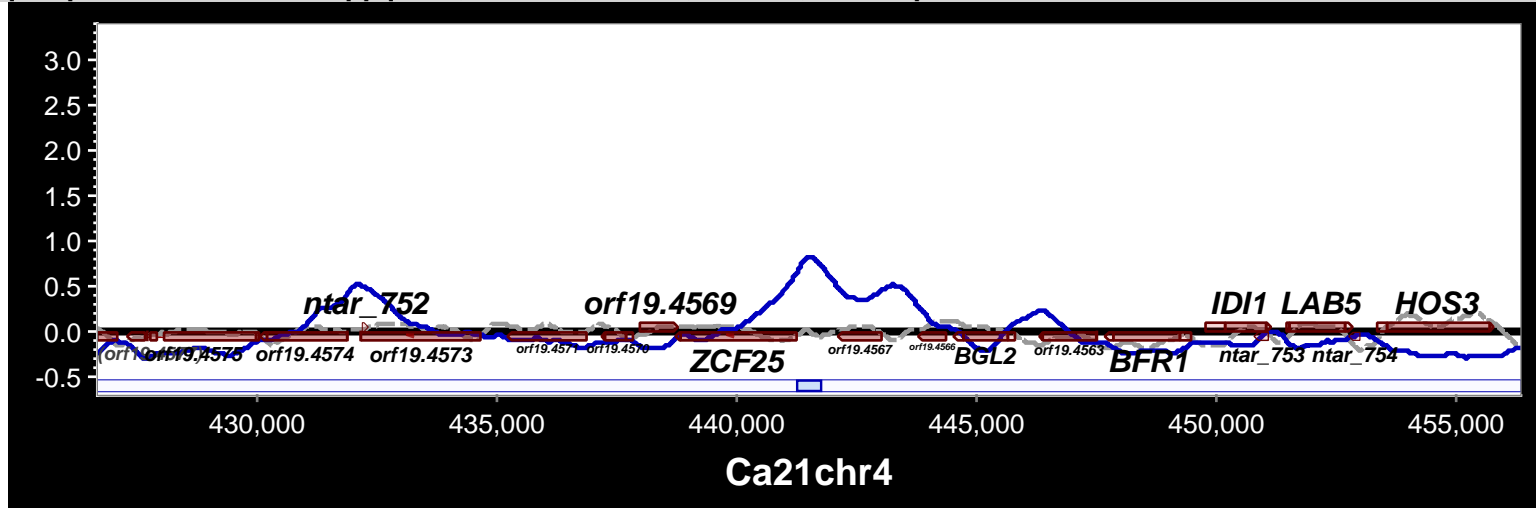

[0.83] Ca21chr3:1486260-1515943 [+] [JEN1, OPI3, LYS9, orf19.7445, orf19.7449]

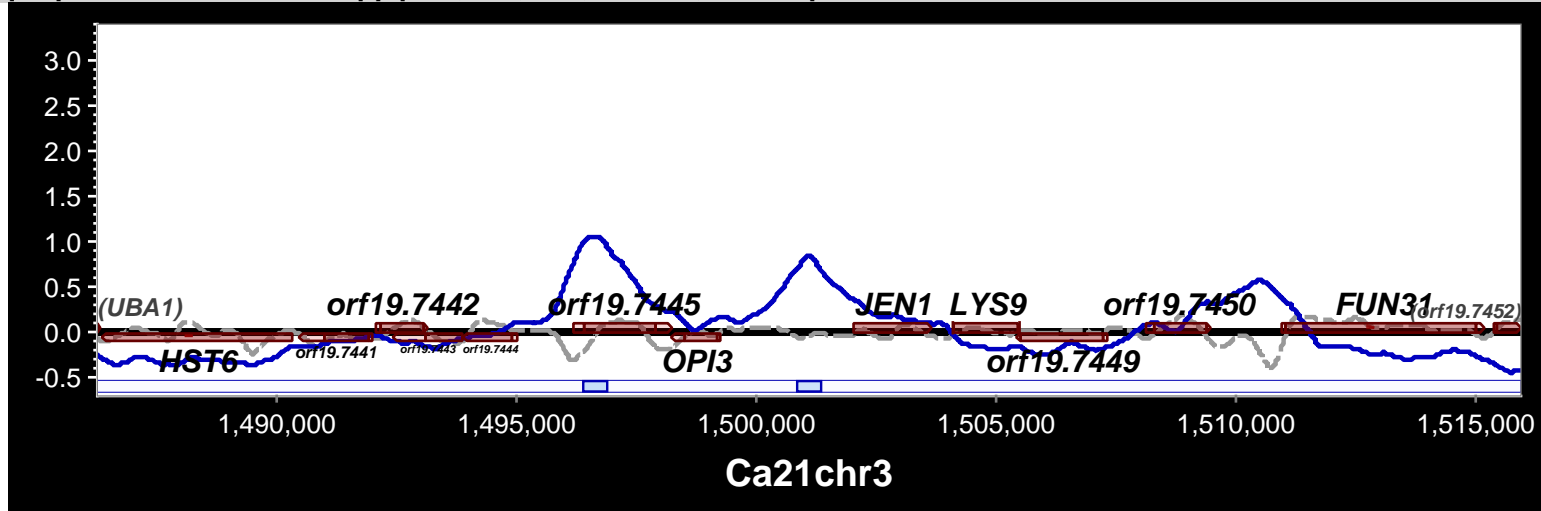

[0.826] Ca21chr5:755146-784829 [+] [tE(UUC)5, orf19.2639, orf19.2638, orf19.2639.1, FUR1]

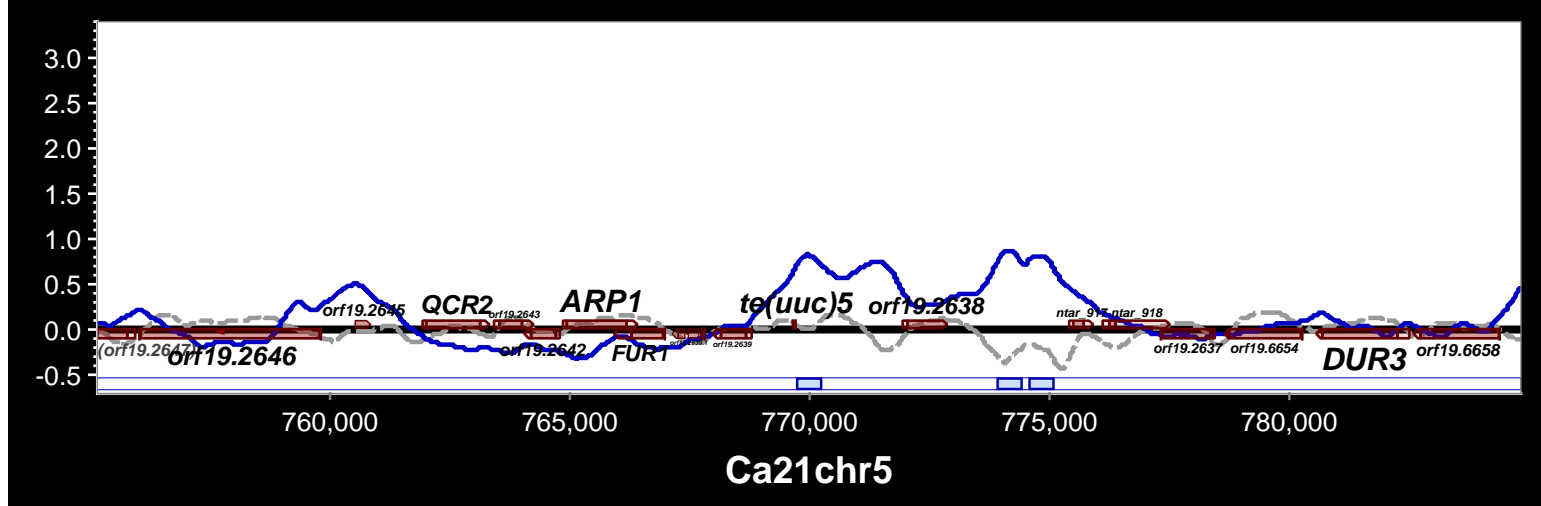

[0.825] Ca21chr2:774083-803766 [+] [tR(UCU)2, tF(GAA)2, YIM1, orf19.849, orf19.846]

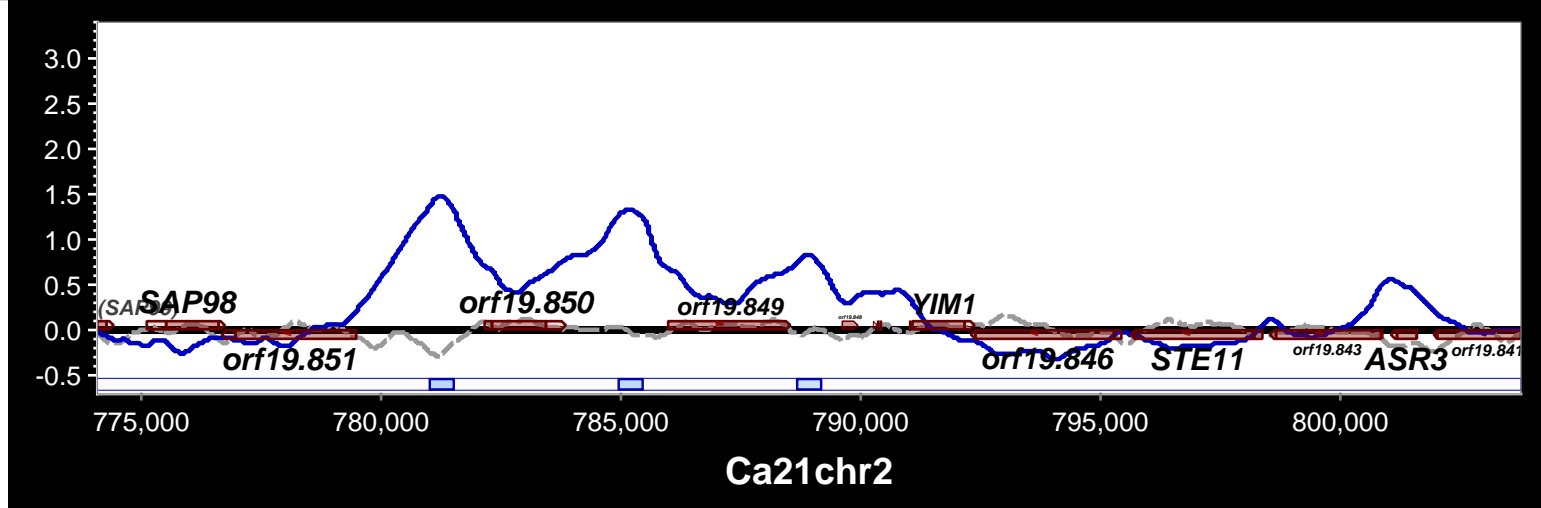

[0.825] Ca21chrR:488949-518632 [+] [IFC1, orf19.3744, orf19.3743, orf19.3742, orf19.3748]

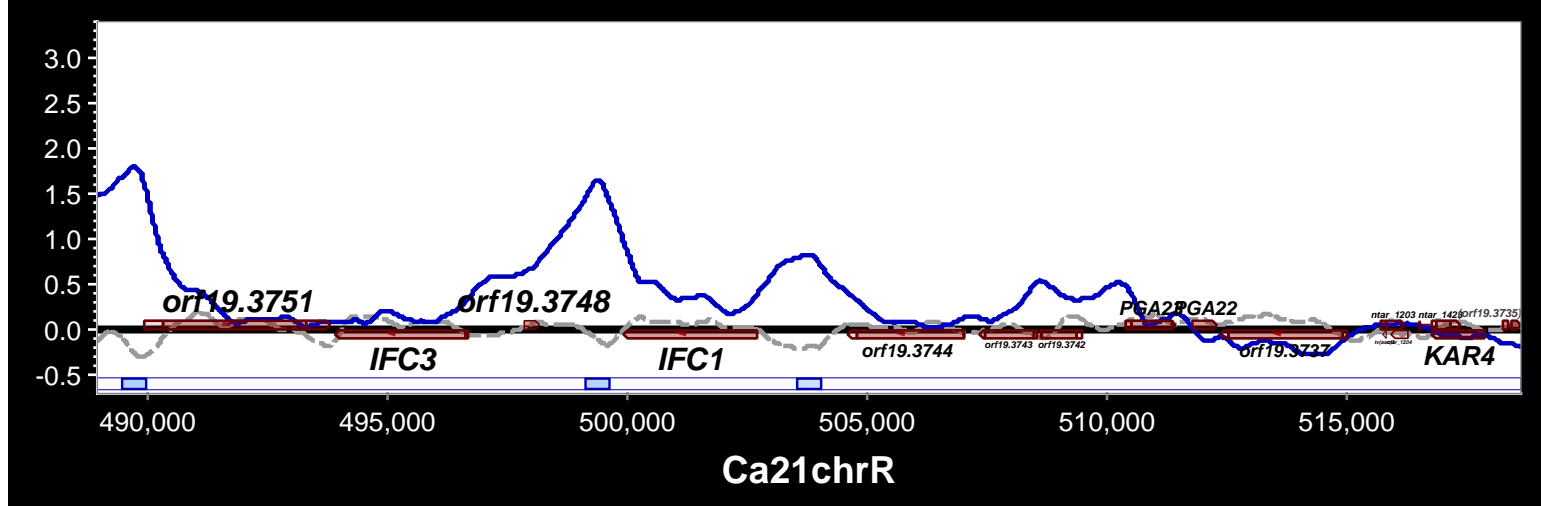

[0.824] Ca21chr2:1461639-1491322 [+] [orf19.2280, orf19.2281, orf19.2282, orf19.2278, DQD1]

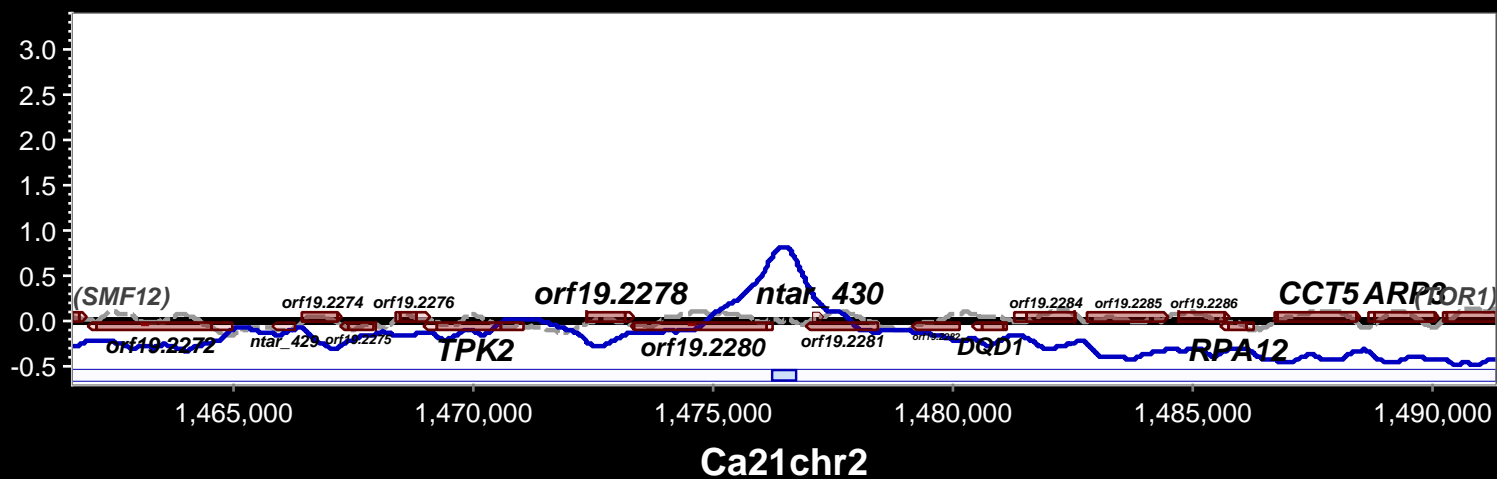

[0.821] Ca21chrR:448621-478304 [+] [ECM4, orf19.2612, RSR1, MCM6, MDL1]

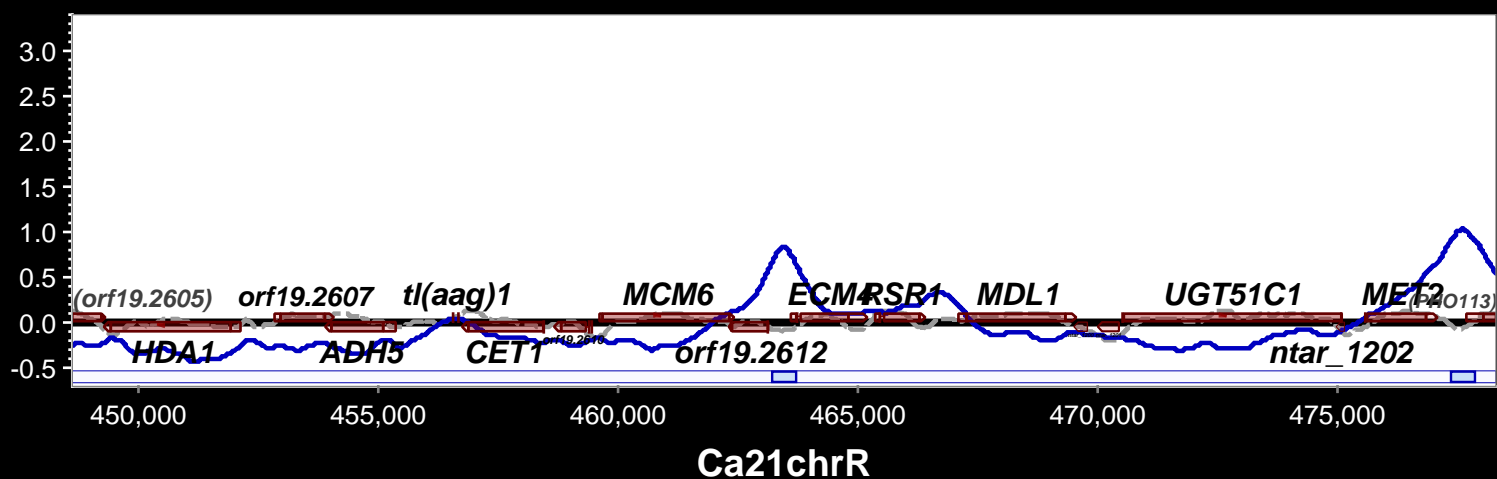

[0.82] Ca21chr4:1248228-1277911 [+] [orf19.1257, orf19.1258, orf19.1259, orf19.1255, LEA1]

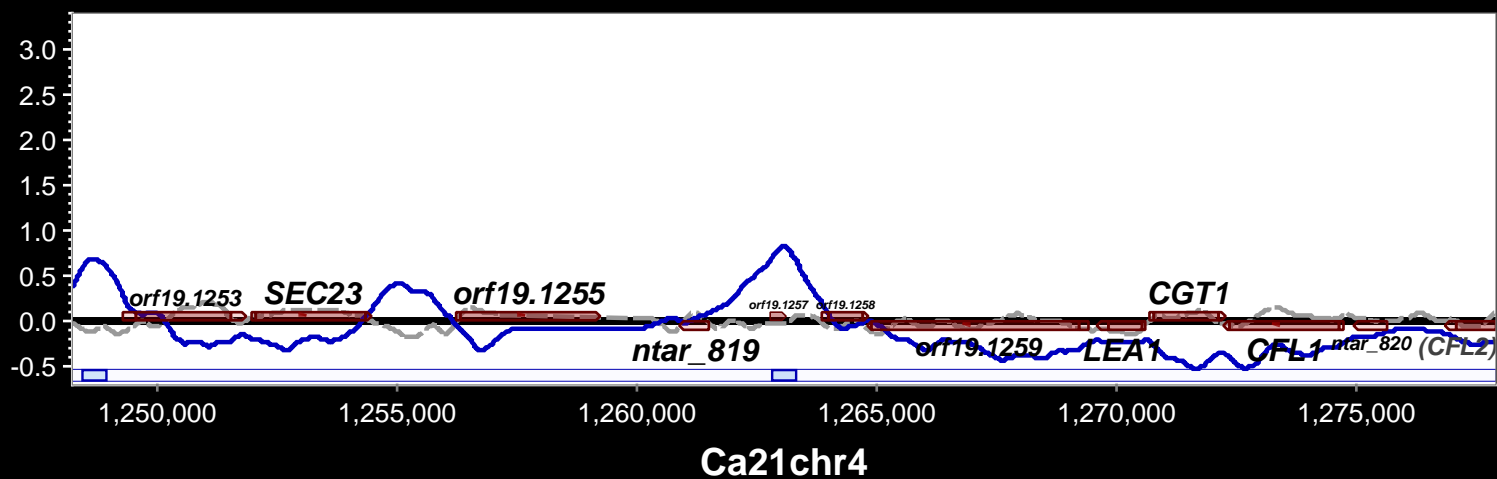

[0.82] Ca21chr7:664170-693853 [+] [DFR1, orf19.5141, orf19.5143, orf19.5140, PGA28]

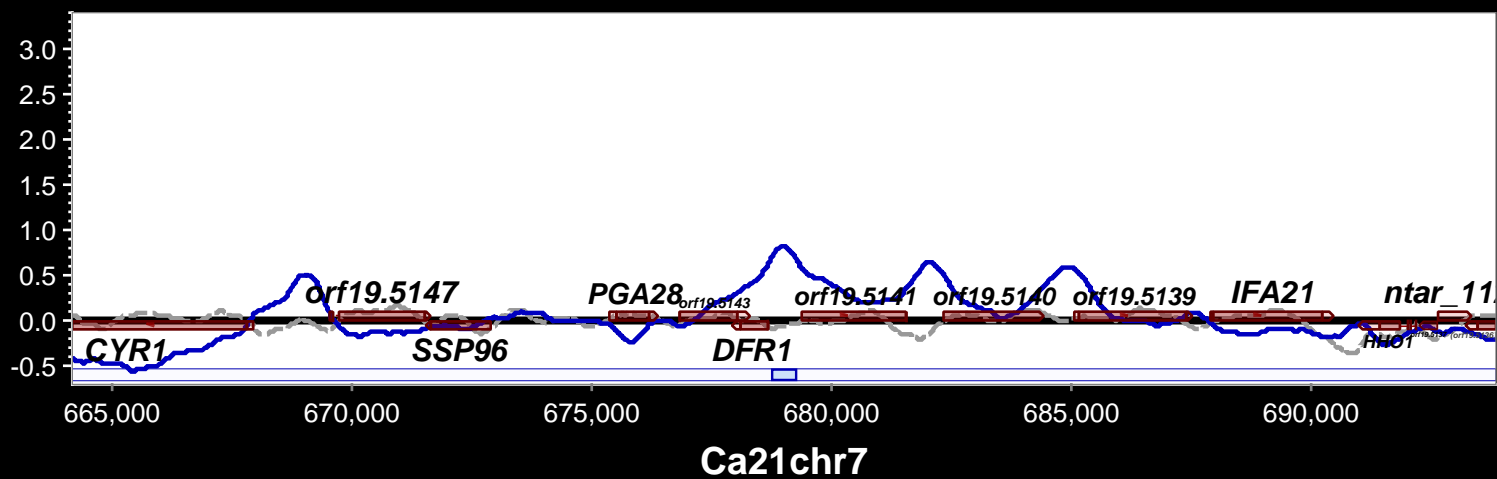

[0.818] Ca21chr1:1086311-1115994 [+] [orf19.446, orf19.445, orf19.444, orf19.443, orf19.446.1]

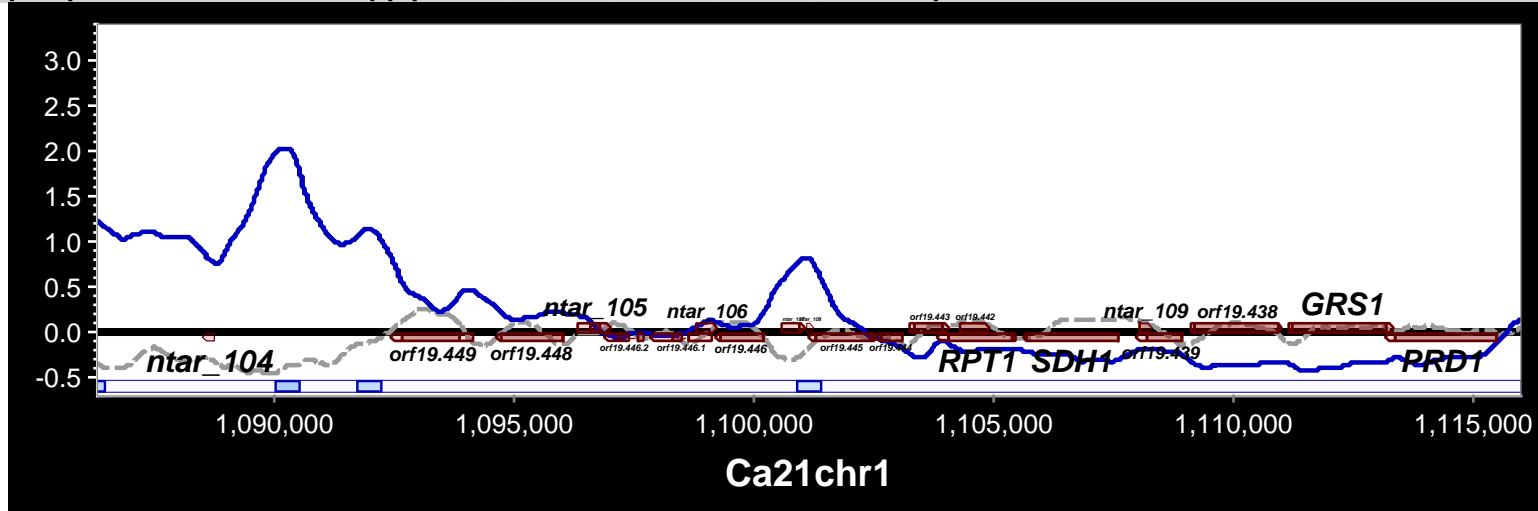

[0.816] Ca21chrR:1618687-1648370 [+] [ECM22, orf19.2624, orf19.2625, YPT31, RGD3]

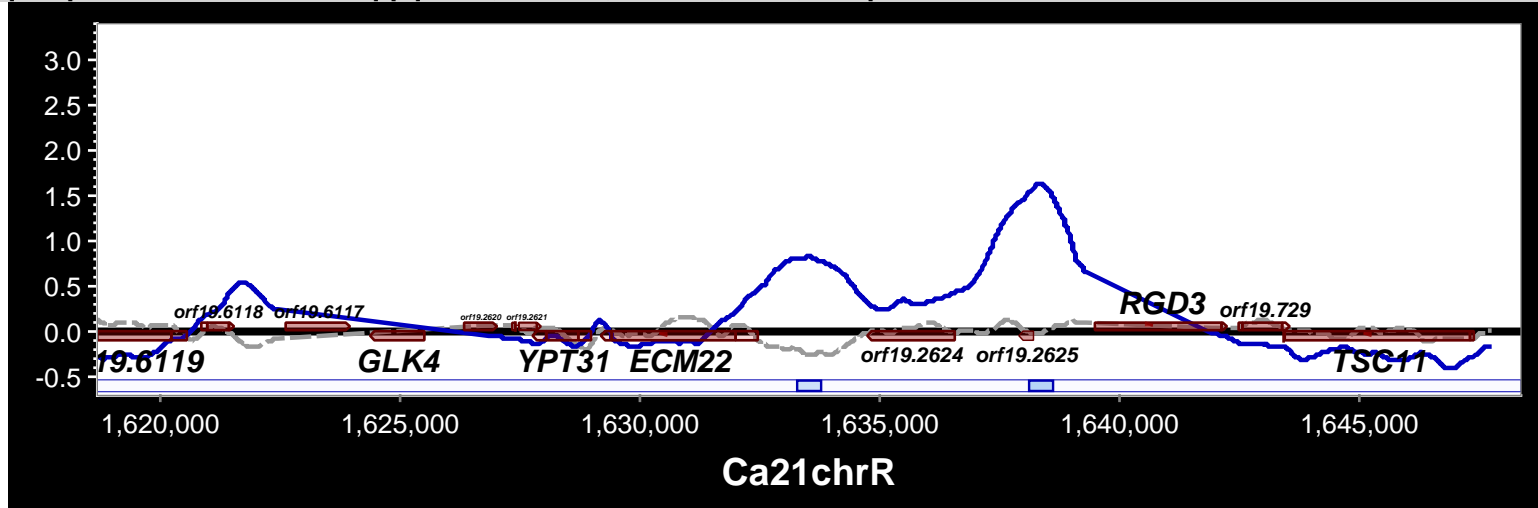

[0.814] Ca21chr5:759991-789674 [+] [orf19.2638, orf19.2637, tE(UUC)5, orf19.6654, orf19.2639]

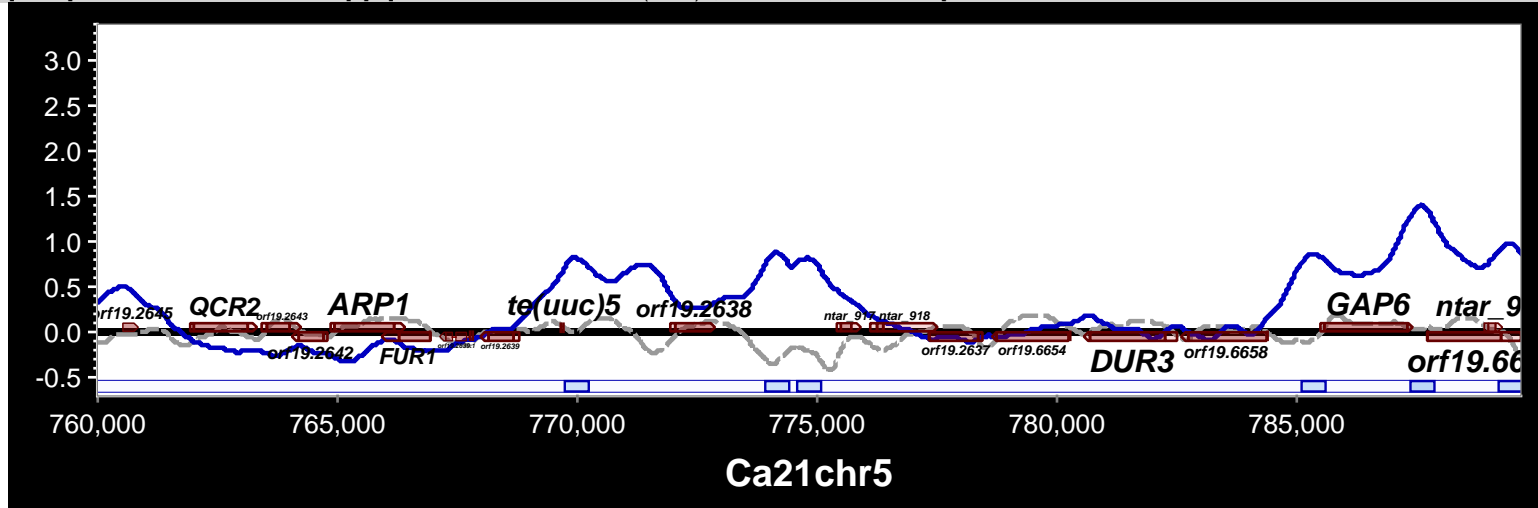

[0.813] Ca21chr1:913361-943044 [+] [ICL1, orf19.6843, orf19.6842, orf19.6845, PHO85]

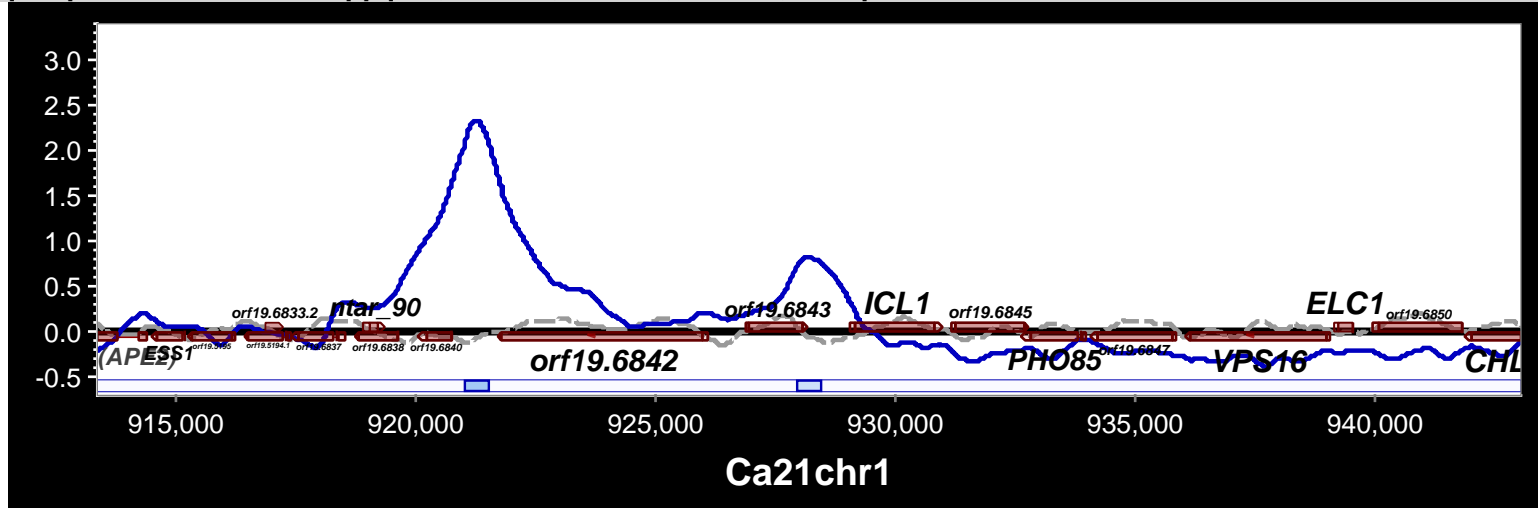



[0.811] Ca21chr1:1991406-2021089 [+] [AOX1, AOX2, CTA8, SSU81, orf19.4776]

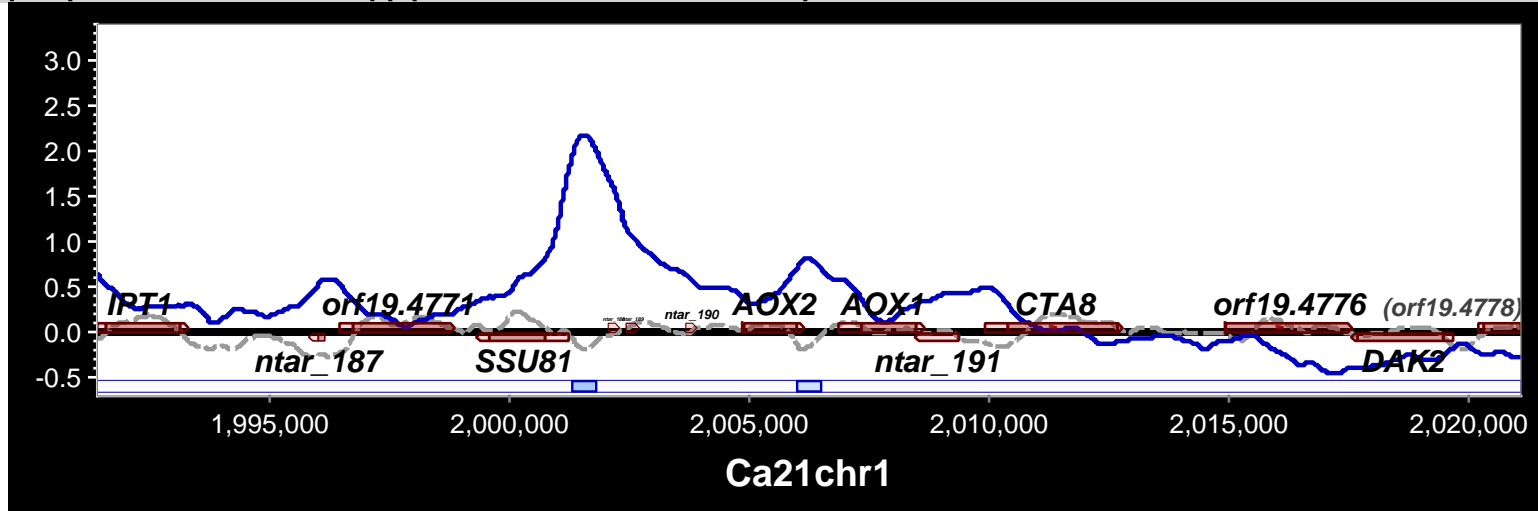

[0.811] Ca21chr7:752315-781998 [+] [orf19.6704, orf19.6705, orf19.1330, HSM3, GYP7]

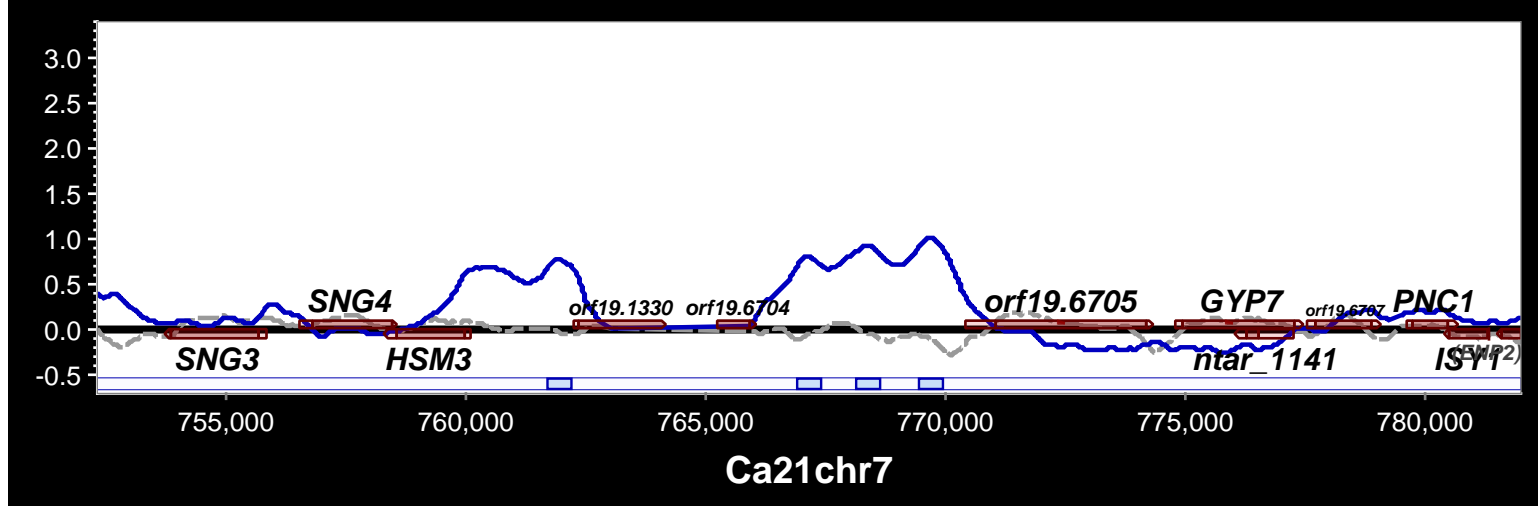

[0.809] Ca21chr5:565771-595454 [+] [PUT1, orf19.4273, orf19.4271, RAD9, orf19.4270]

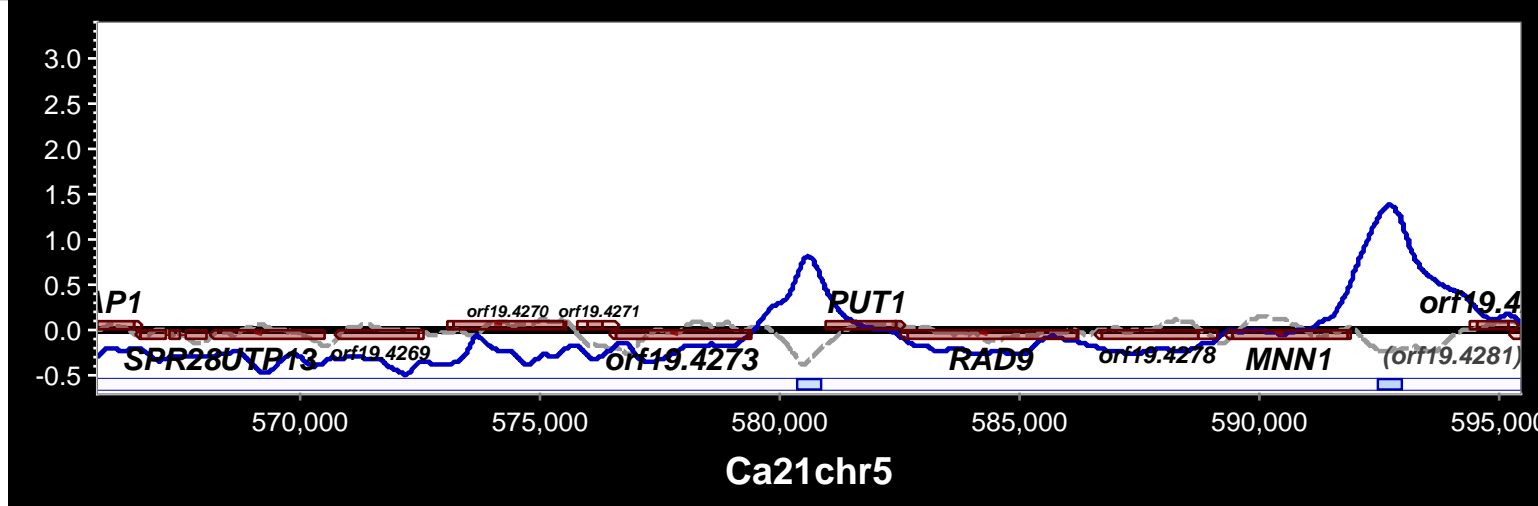

[0.805] Ca21chr3:1210480-1240163 [+] [orf19.6984, TEA1, tV(AAC)5, tV(AAC)6, orf19.6983]

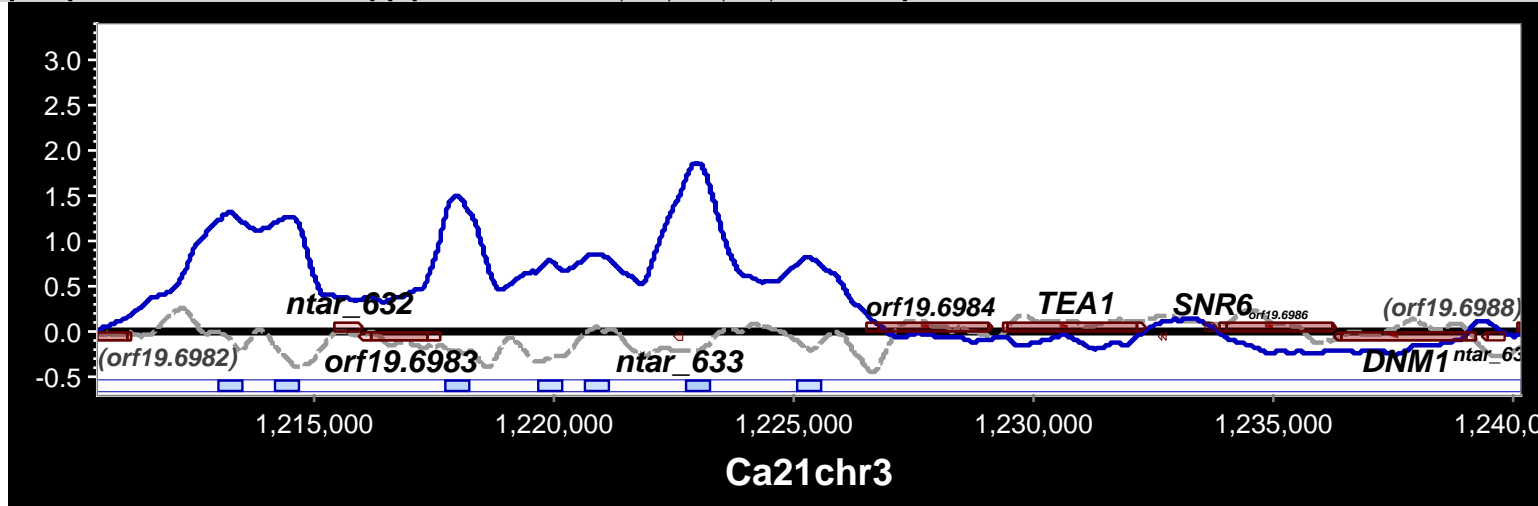

[0.805] Ca21chr6:239442-269125 [+] [TRA1, FIG1, orf19.137, orf19.136, orf19.135]

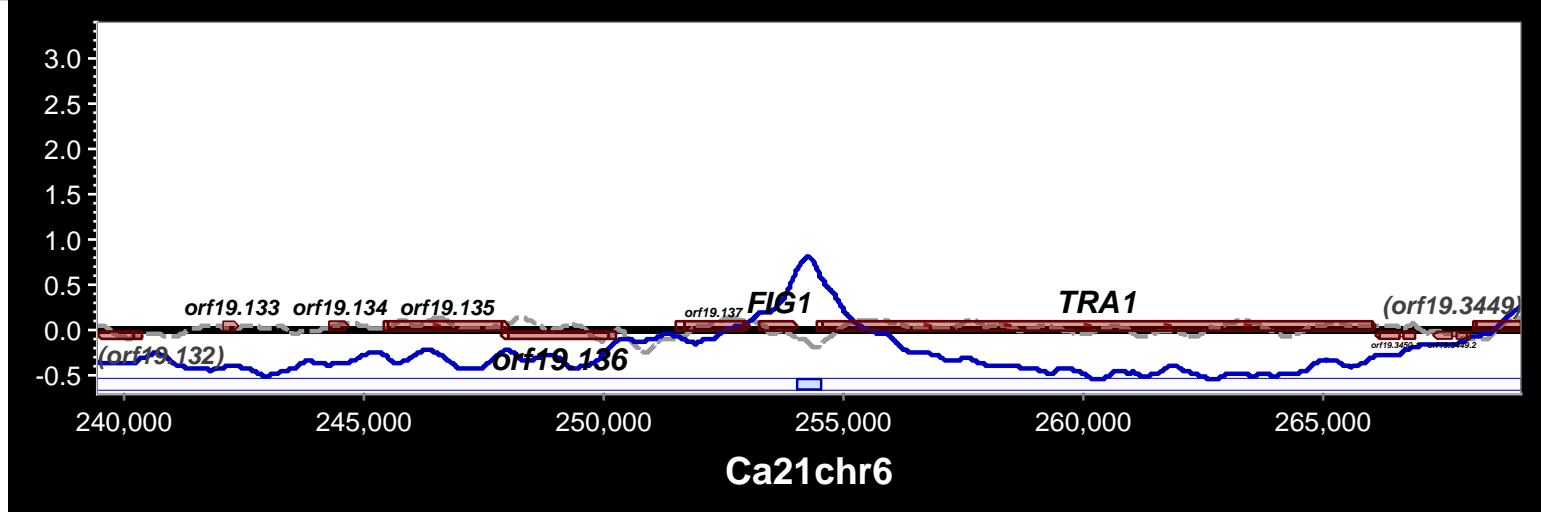

[0.805] Ca21chrR:1883238-1912921 [+] [orf19.7279.1, orf19.7279, orf19.7280, TAR1, PDK2]

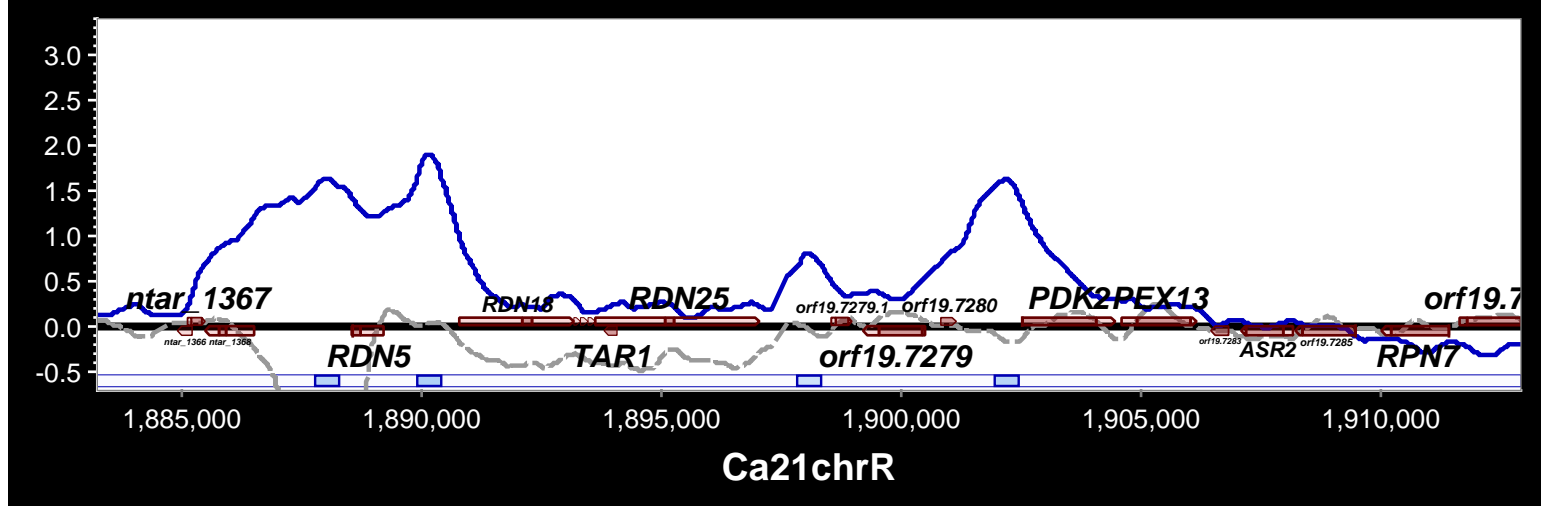

[0.804] Ca21chrR:1679651-1709334 [+] [SAP2, YHB5, orf19.3711, YHB1, orf19.3712]

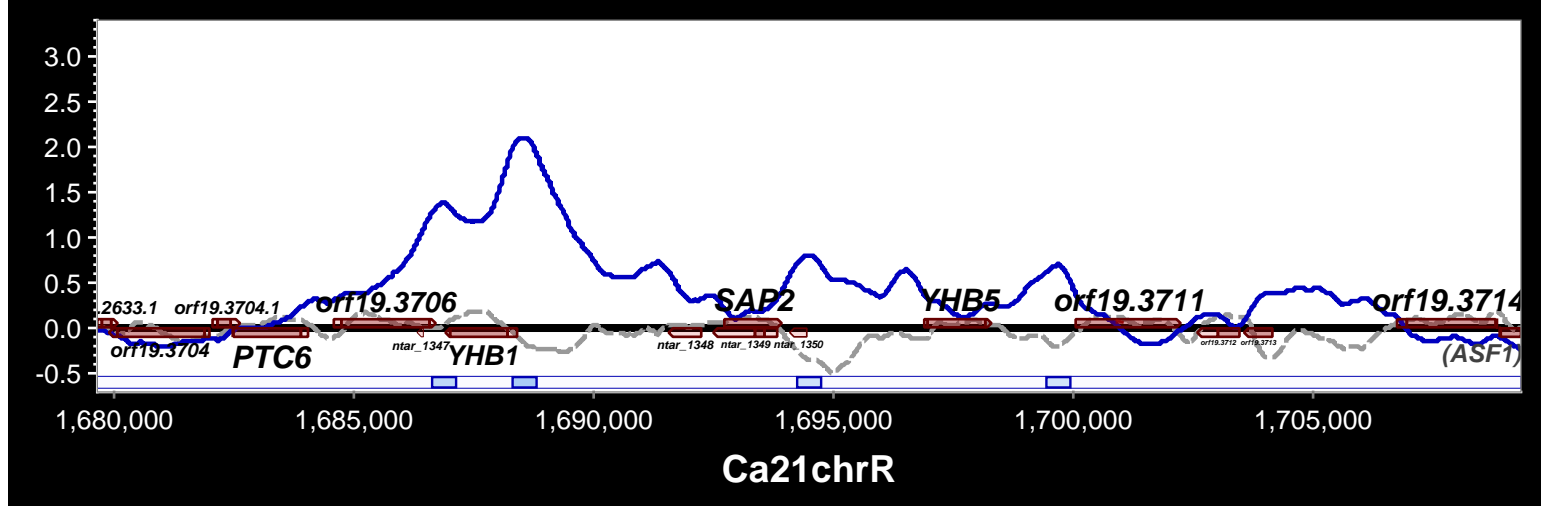

[0.8] Ca21chrR:2188795-2218478 [+] [PGA11, PTP3, orf19.7608, orf19.7606, TRX1]

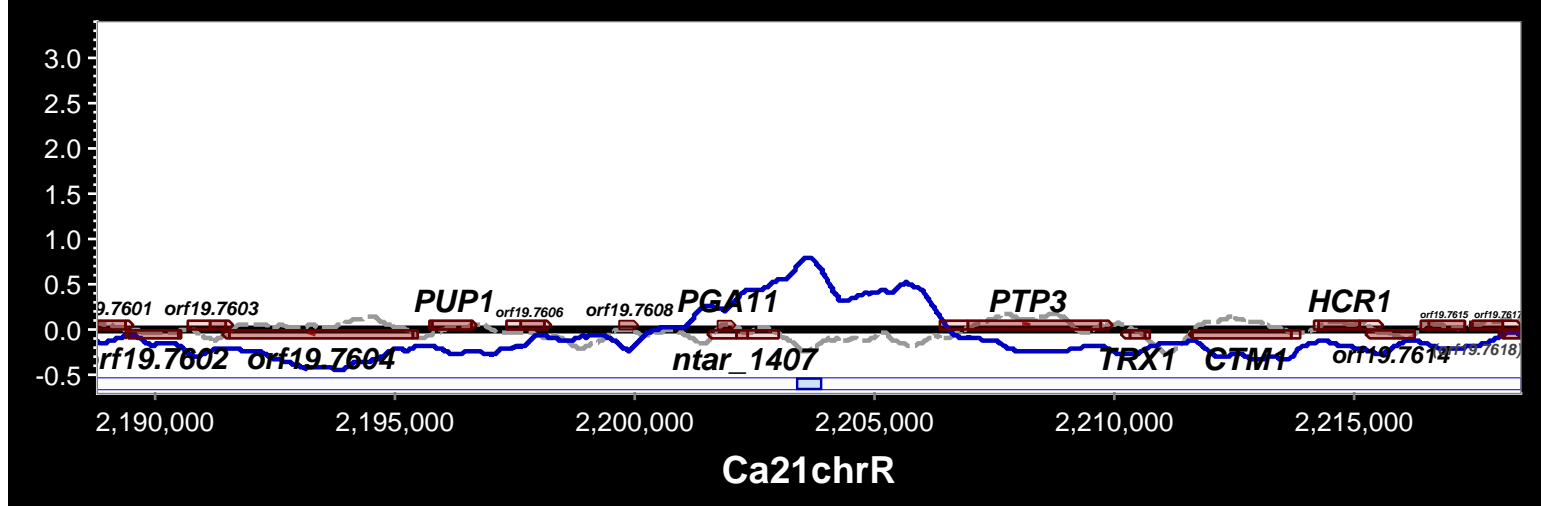

[0.799] Ca21chr2:1044008-1073691 [+] [orf19.3544, orf19.3545, LEM3, ERF1, orf19.3546]

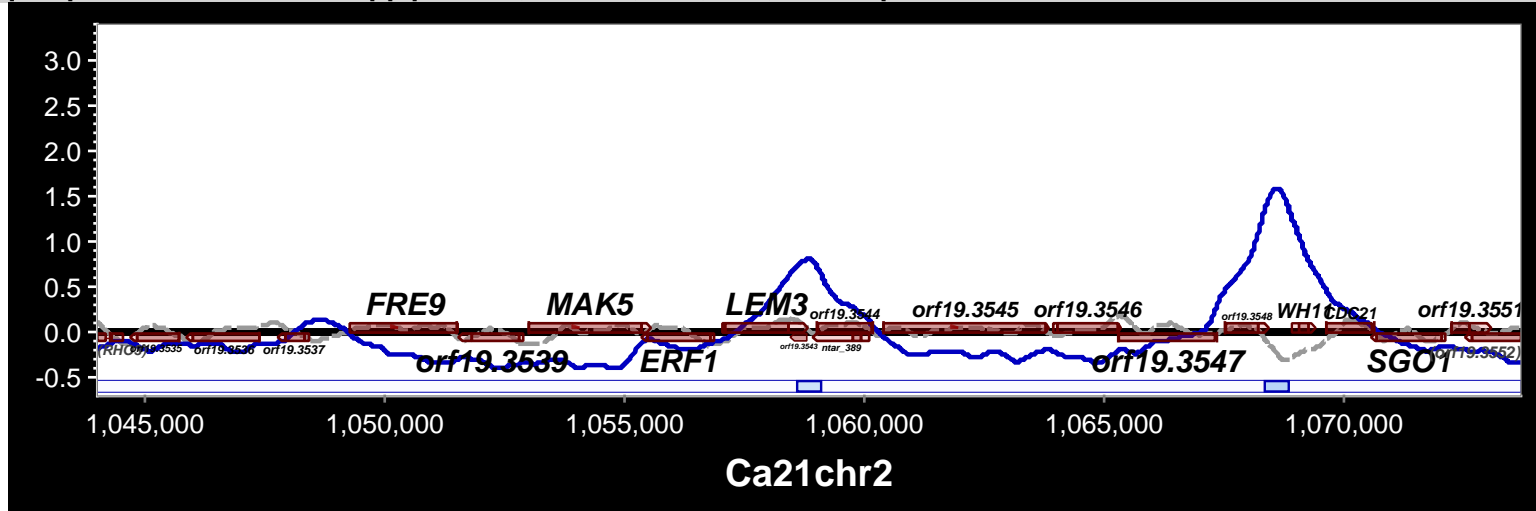

[0.795] Ca21chr2:1530684-1560367 [+] [RNR22, orf19.1867, orf19.1866, orf19.1871, orf19.1865]

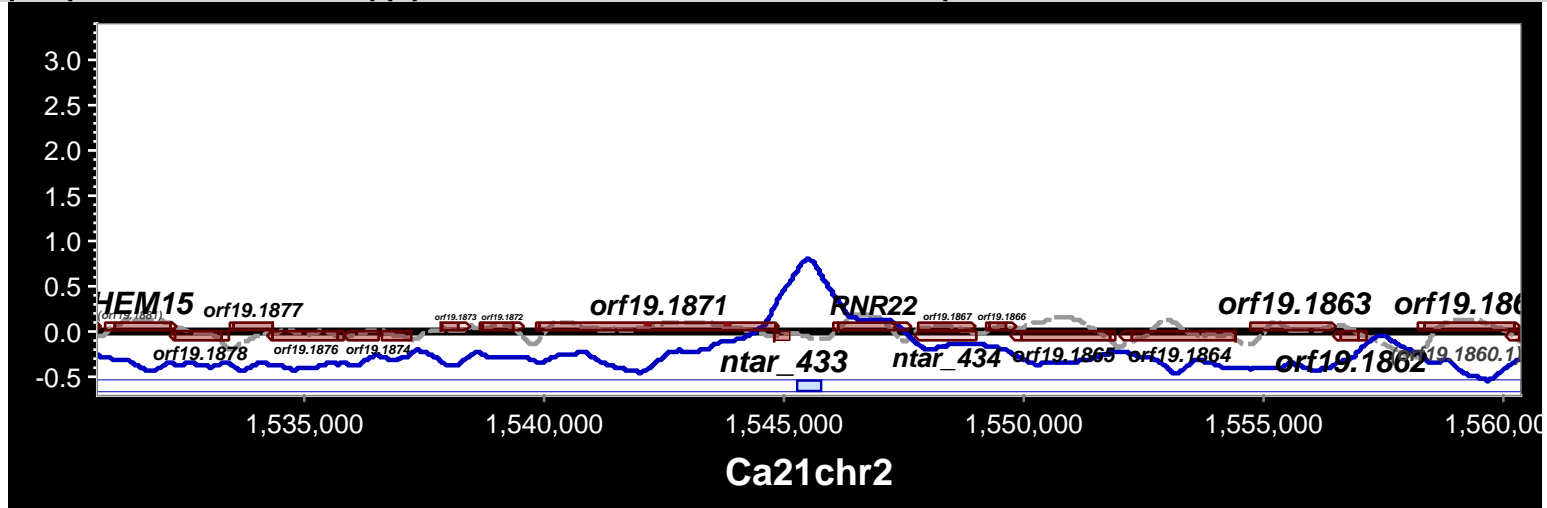

[0.795] Ca21chr7:904372-934055 [+] [NRG1, orf19.7151, orf19.7149, TPO2, orf19.7152]

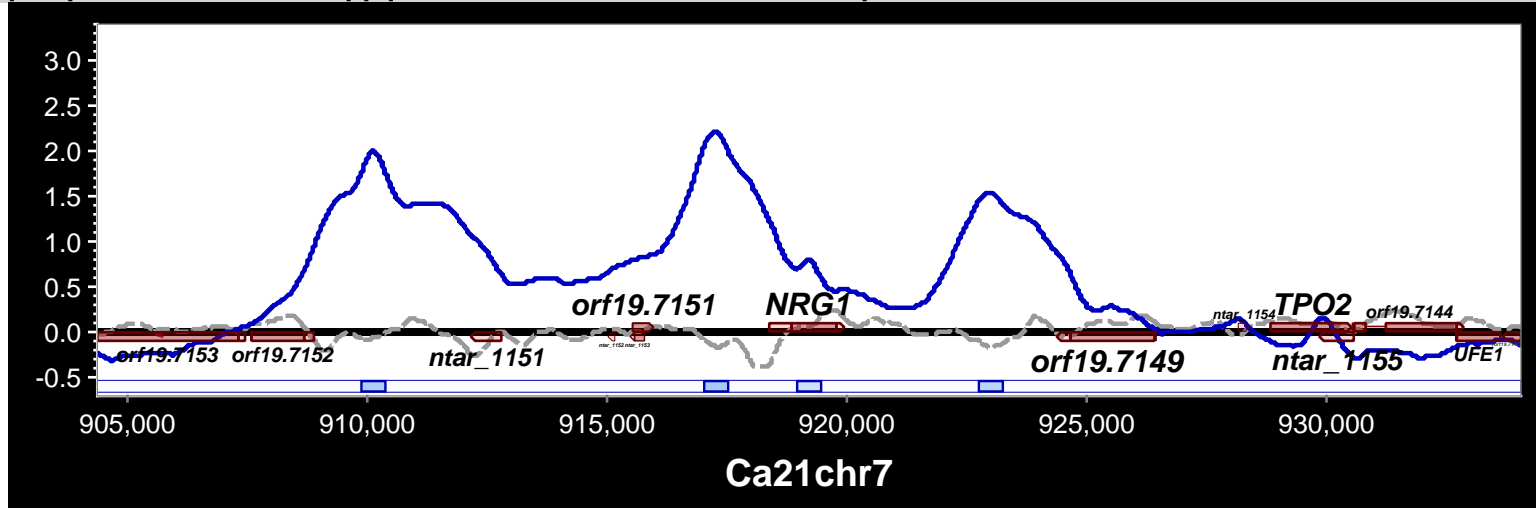

[0.792] Ca21chr1:1447165-1476848 [+] [orf19.6224, PCL7, orf19.6222.1, orf19.6225.1, SPO22]

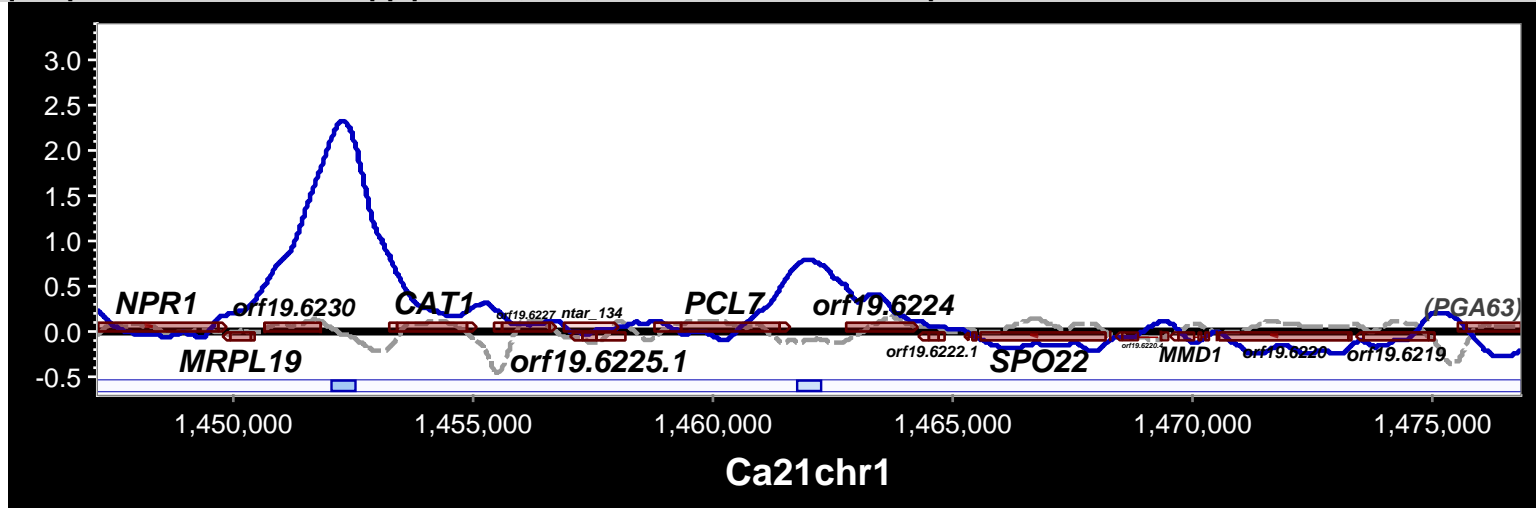

[0.791] Ca21chr4:246781-276464 [+] [orf19.4657, orf19.4658, orf19.4659, orf19.4656, RPS6A]

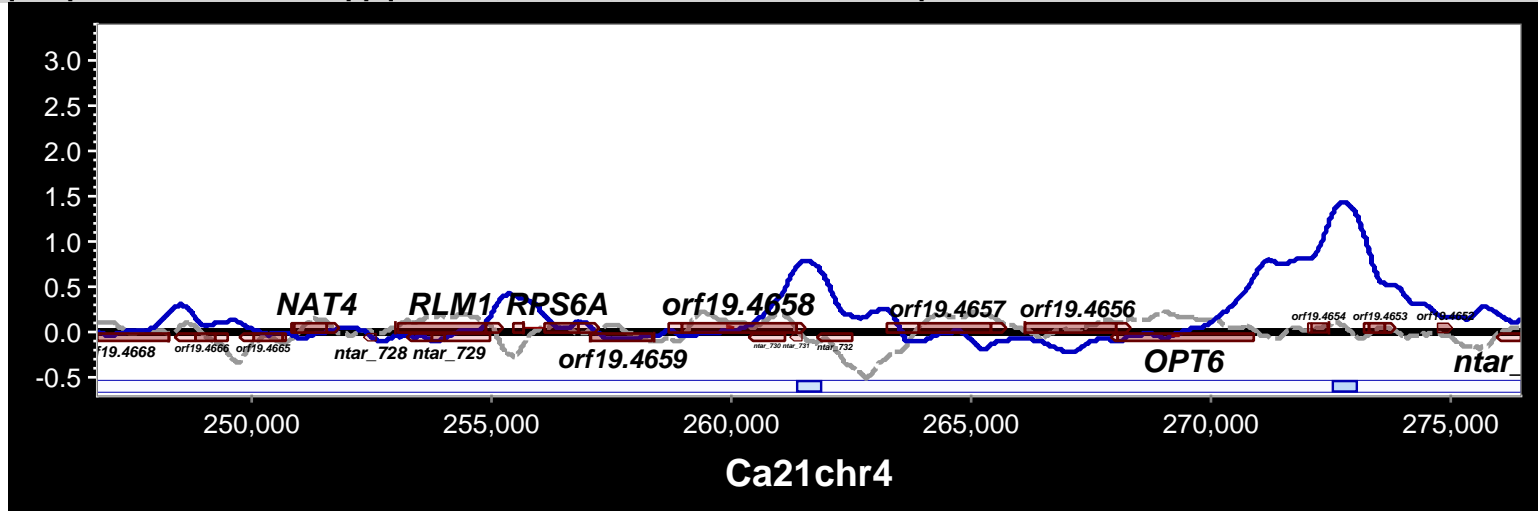

[0.791] Ca21chr5:480345-510028 [+] [orf19.4230, orf19.4229, PTH2, orf19.4228, orf19.4227]

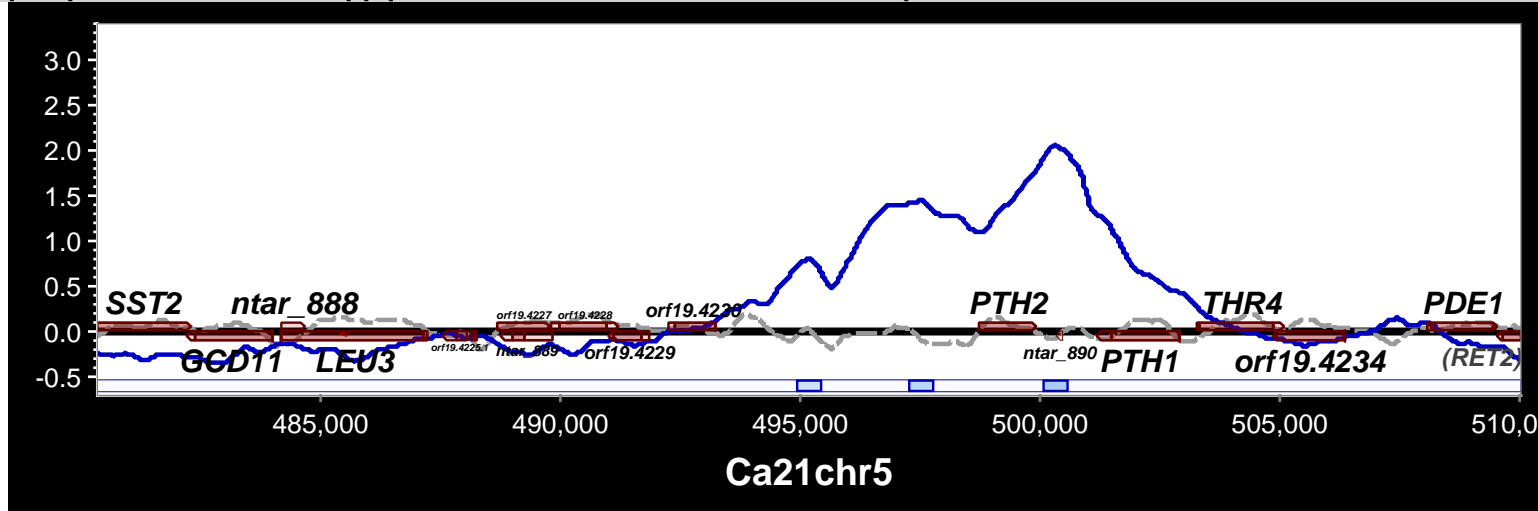

[0.789] Ca21chr7:812997-842680 [+] [PLC1, HIS7, ENP1, orf19.5504, orf19.5508]

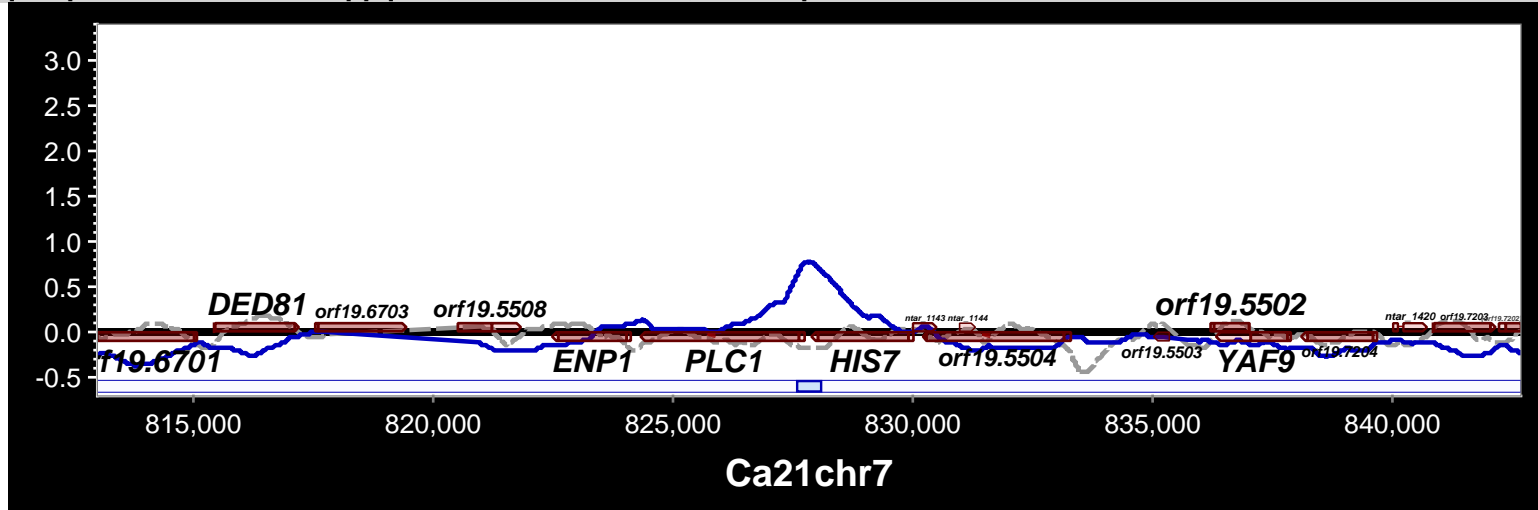

[0.788] Ca21chr4:1420493-1450176 [+] [orf19.2888, MET13, orf19.2889, orf19.2890, CEK1]

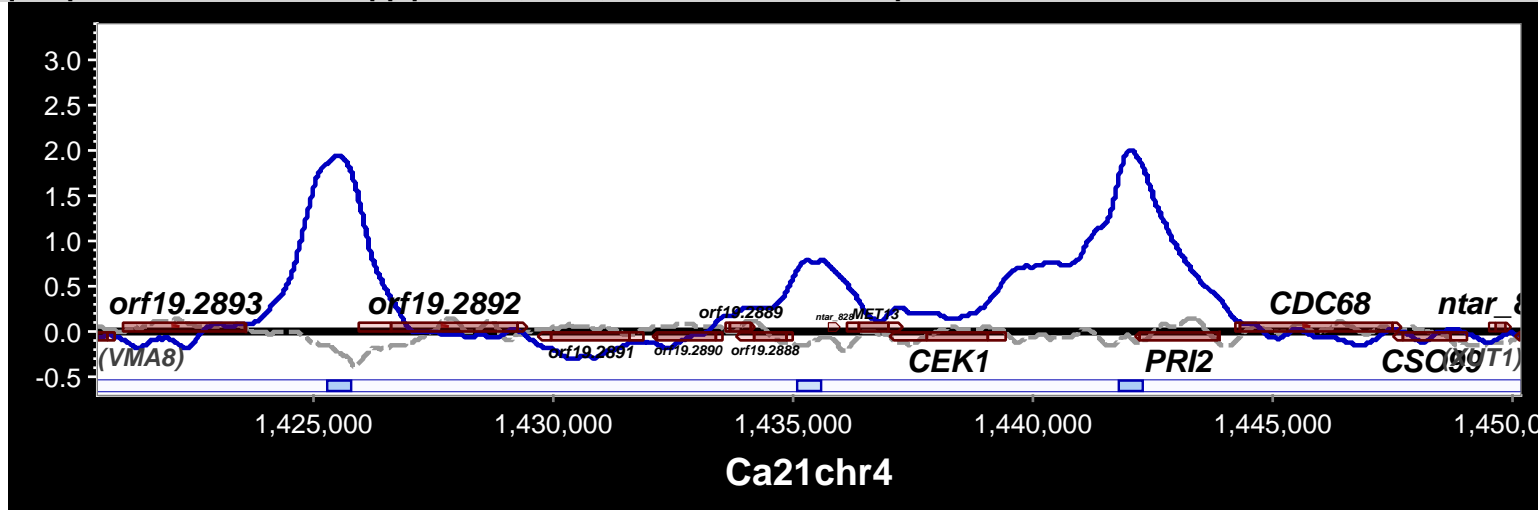

[0.787] Ca21chr7:130464-160147 [+] [orf19.7042, orf19.7043, ACB1, orf19.7041, orf19.7038]

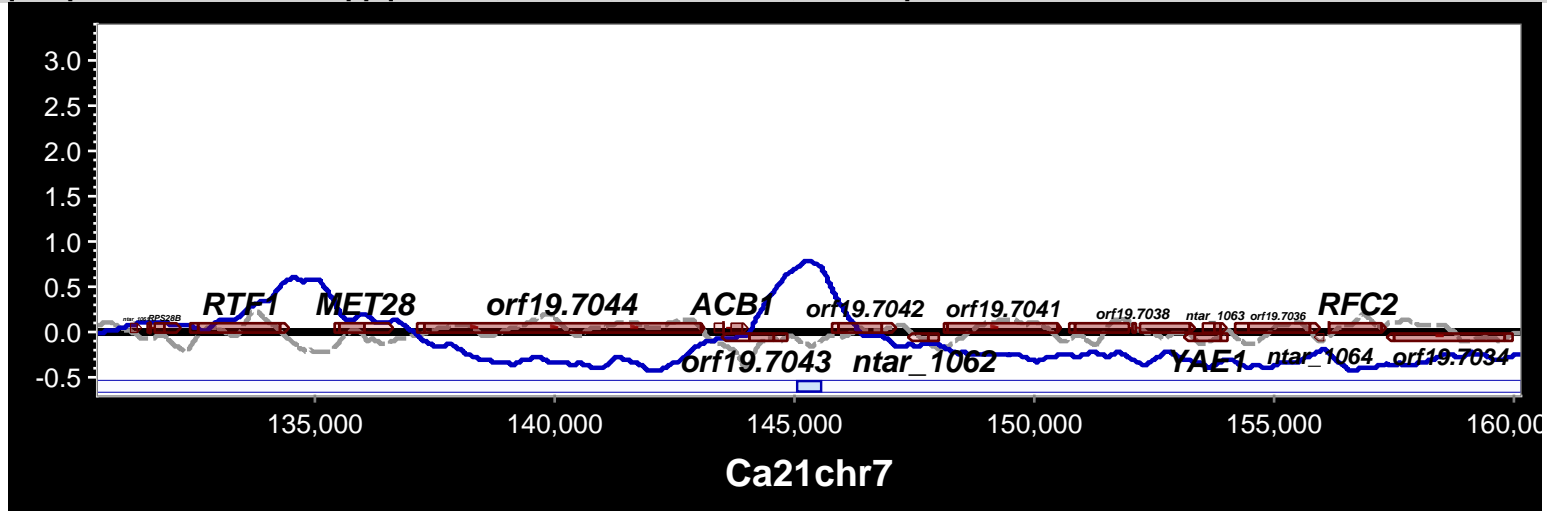

[0.784] Ca21chr1:2221000-2250683 [+] [MIR1, orf19.4886, WOR1, ECM21, orf19.4888]

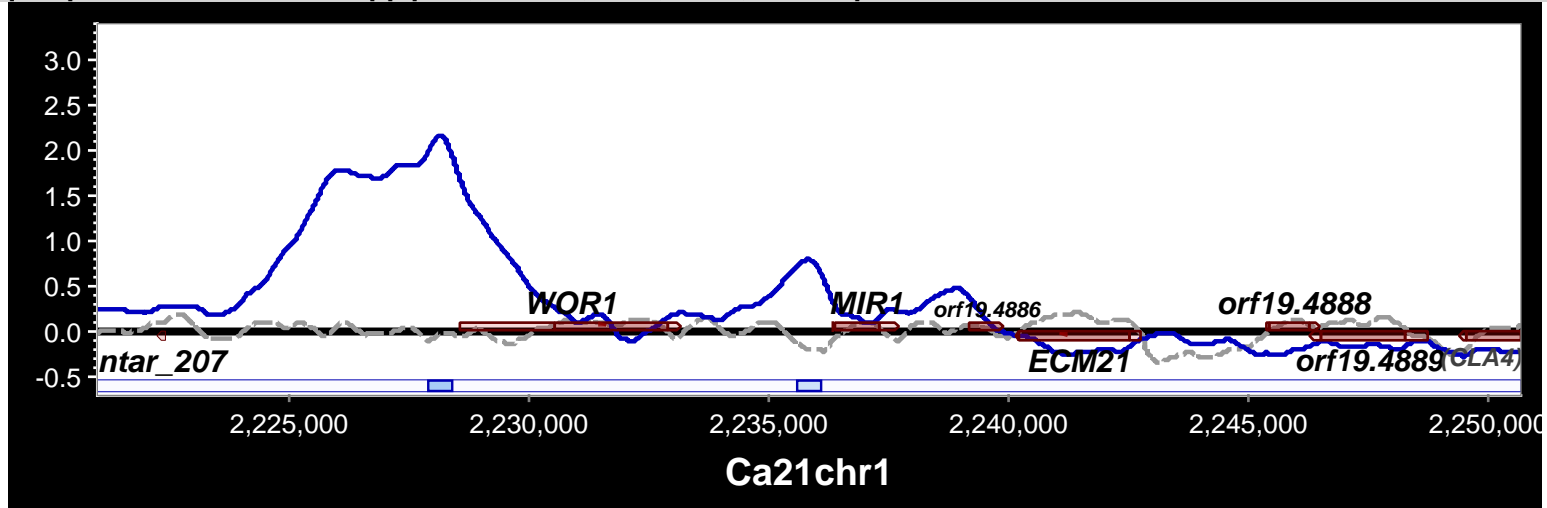

[0.78] Ca21chr1:2831273-2860956 [+] [FAD3, OP4, orf19.4932, RPL14, orf19.4931]

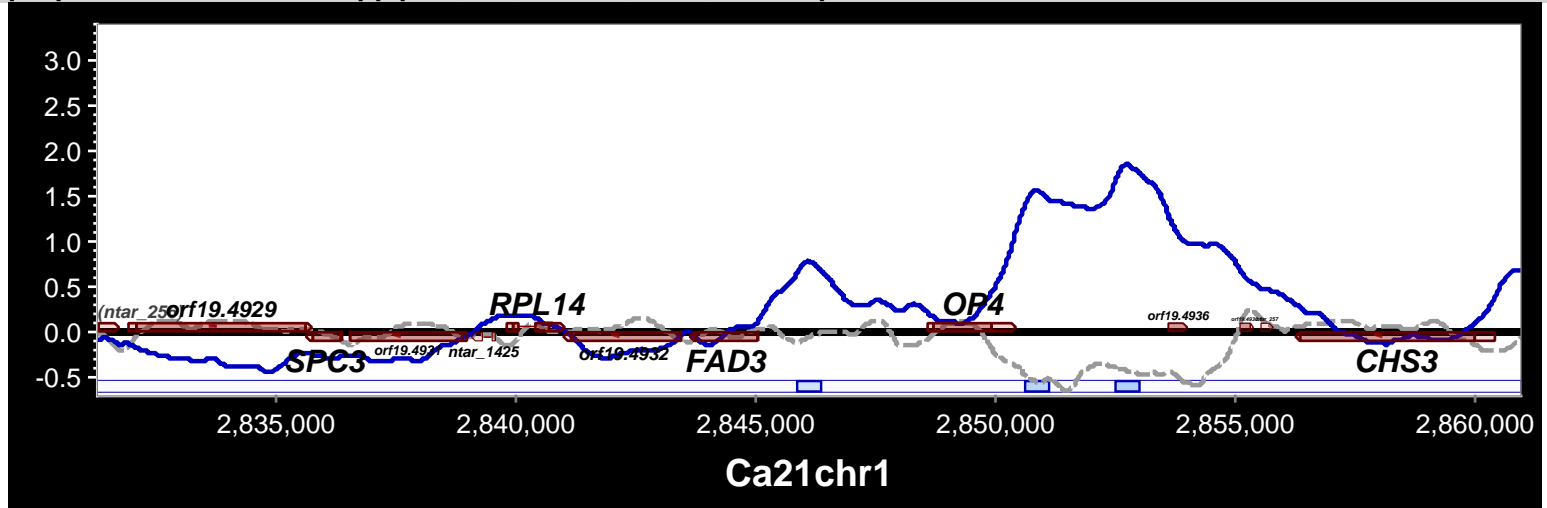

[0.78] Ca21chr2:1269990-1299673 [+] [orf19.5495, GSP1, orf19.5492, ATP14, AVT1]

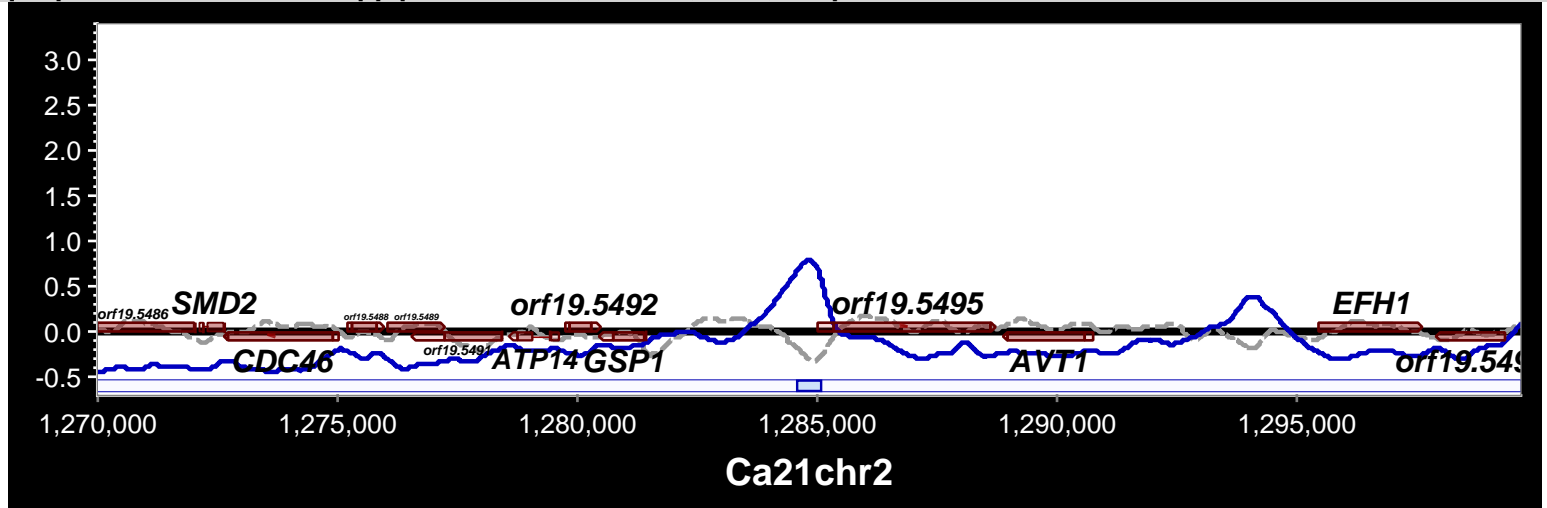

[0.78] Ca21chr7:18699-48382 [+] [orf19.7098, orf19.7097, orf19.7100, orf19.7101, orf19.7102]

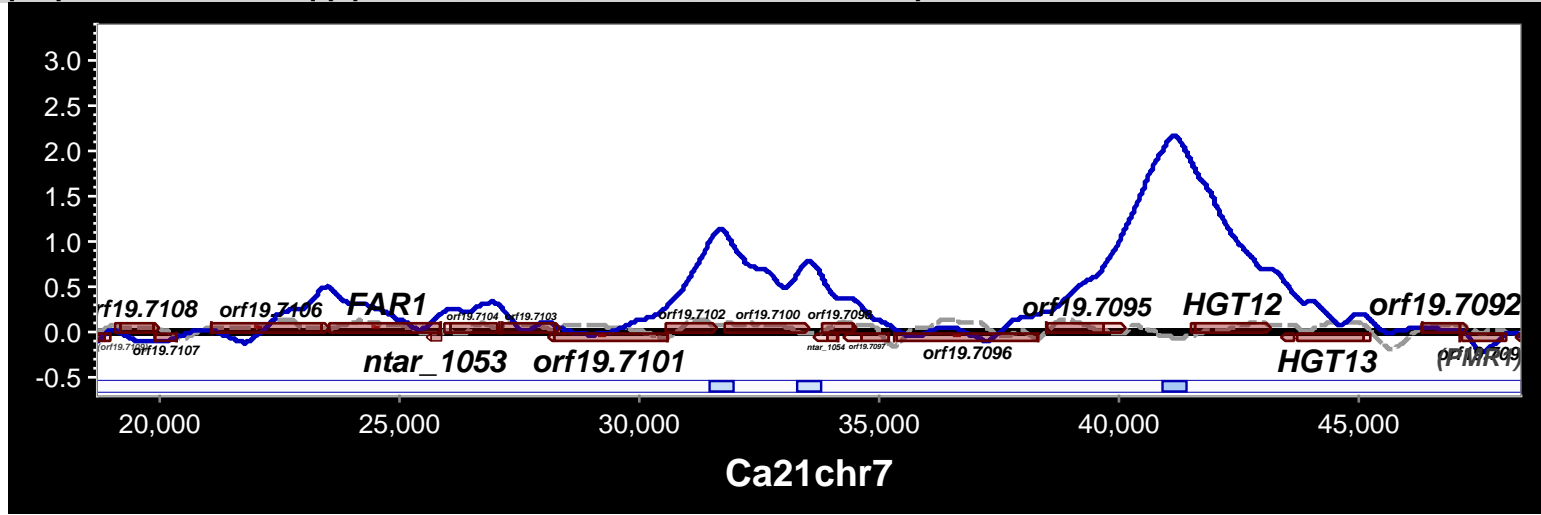

[0.779] Ca21chr4:52524-82207 [+] [MEP2, orf19.5671, orf19.5669, OPT7, PGA10]

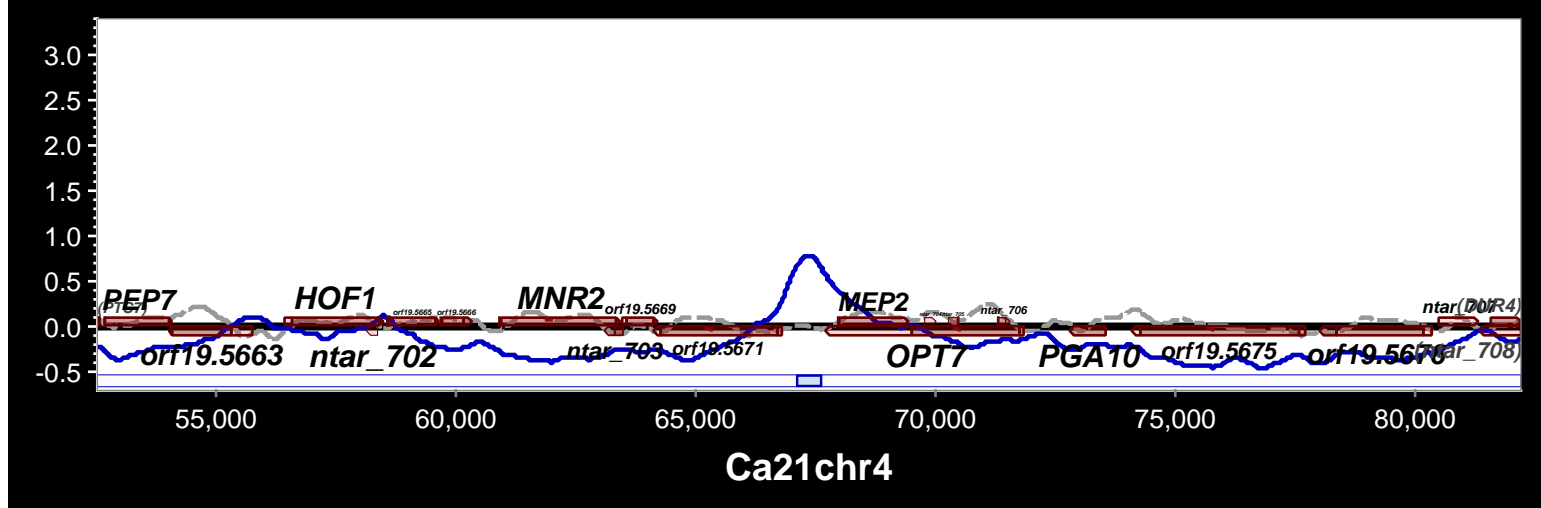

[0.778] Ca21chr1:18990-48673 [+] [orf19.6084, orf19.6083, orf19.6082, RPL16A, PHR2]

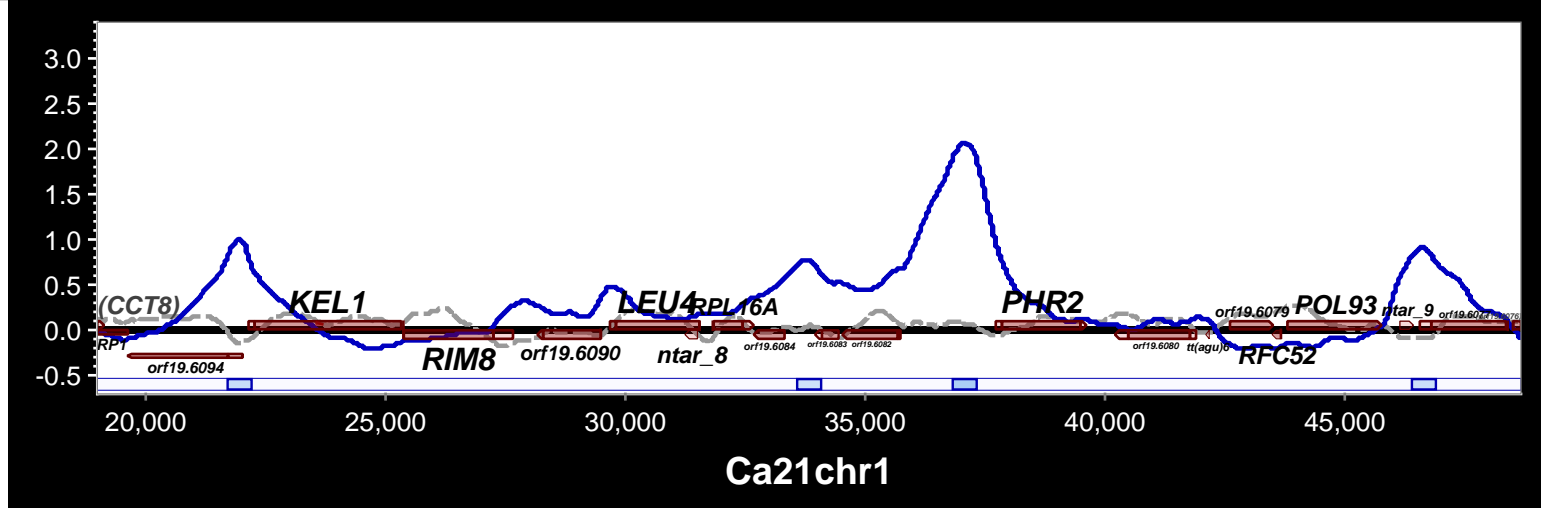

[0.778] Ca21chr1:2759285-2788968 [+] [RVS162, orf19.6350, orf19.6351, orf19.6348, orf19.6353]

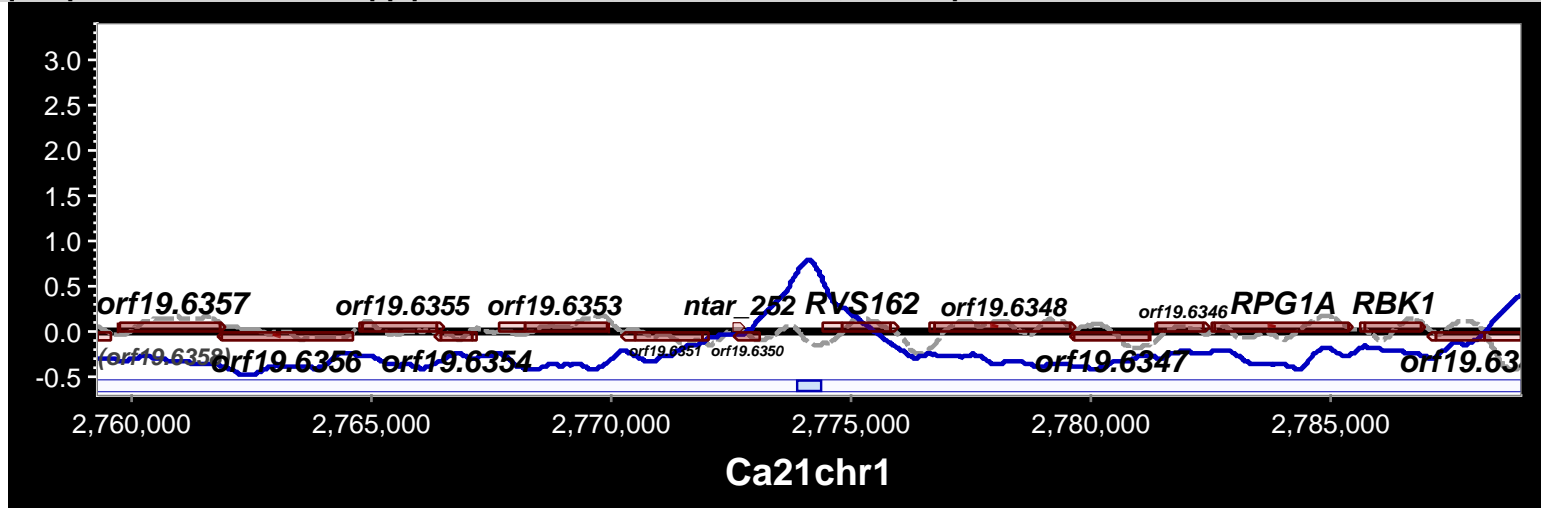

[0.778] Ca21chr2:2015631-2045314 [+] [GCN4, orf19.1359, orf19.1360, orf19.1360.1, orf19.1361]

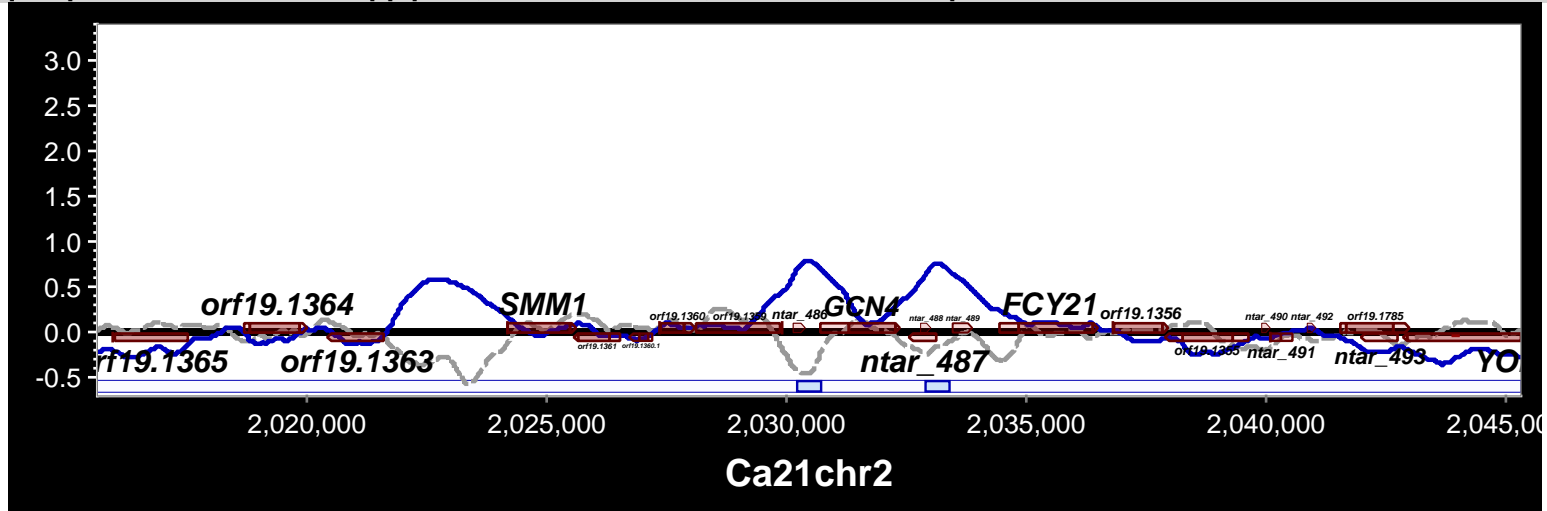

[0.778] Ca21chr3:1205081-1234764 [+] [orf19.6983, orf19.6984, orf19.6982, TEA1, orf19.6981]

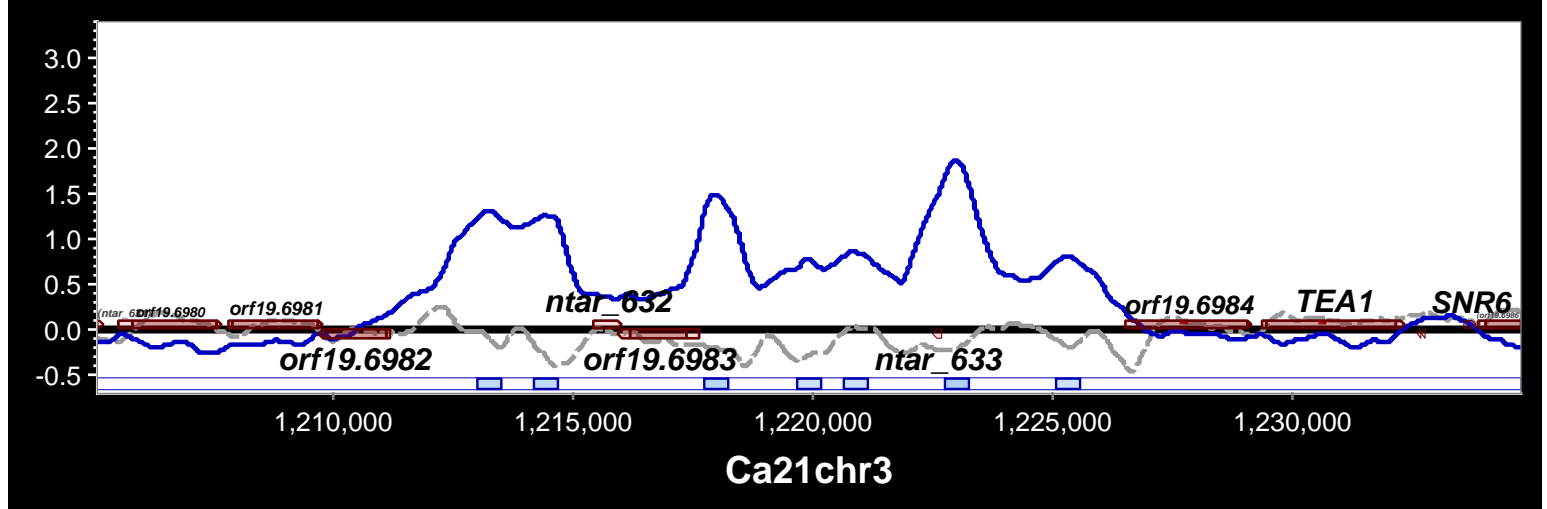

[0.776] Ca21chr5:927744-957427 [+] [orf19.3907, orf19.3908, orf19.3910, orf19.3906, orf19.3905]

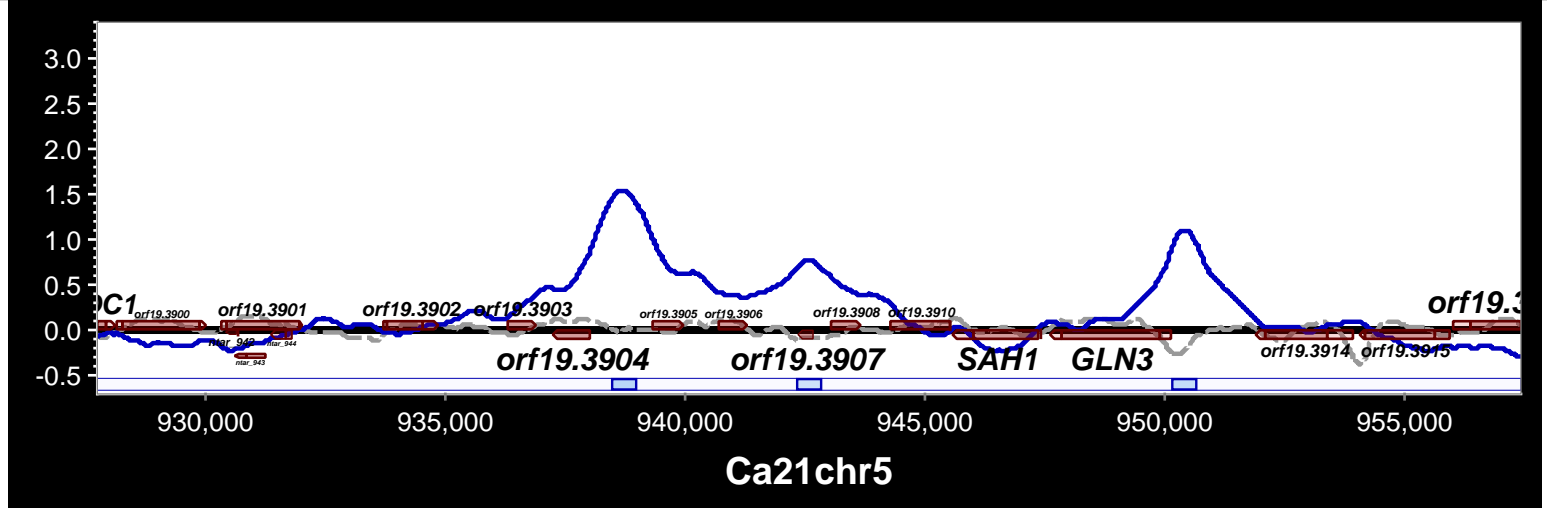

[0.776] Ca21chr7:189676-219359 [+] [YOX1, RPS18, YML6, PHM5, orf19.7020]

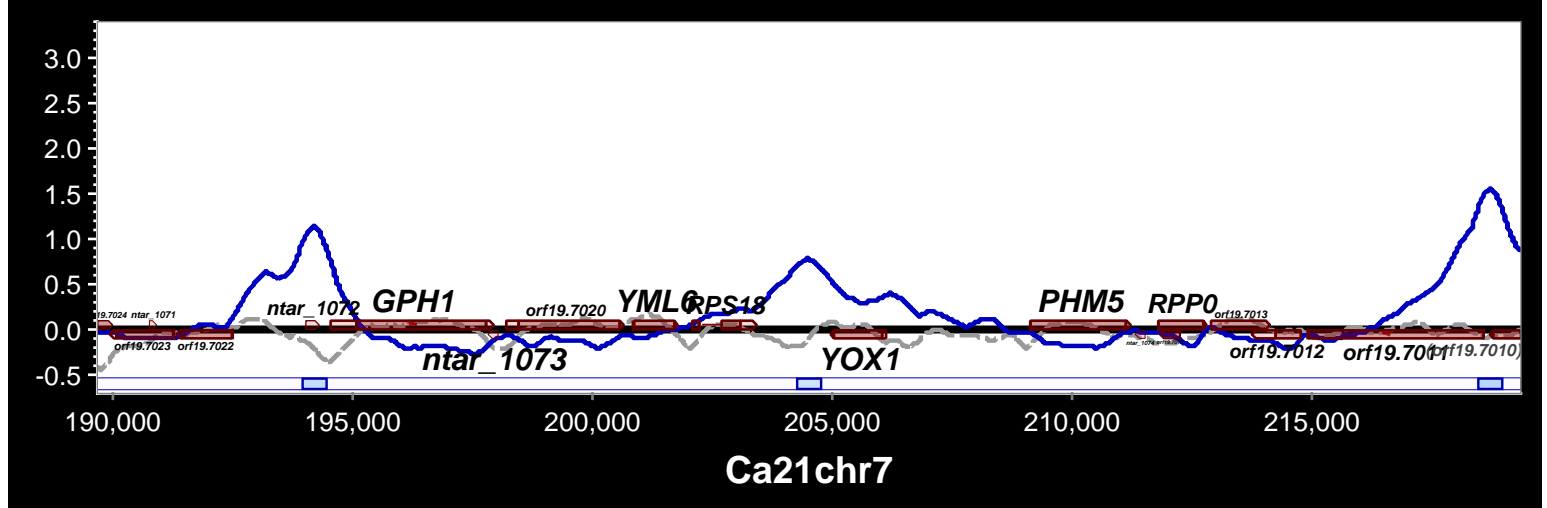

[0.776] Ca21chr7:747109-776792 [+] [orf19.1330, HSM3, orf19.6704, SNG4, SNG3]

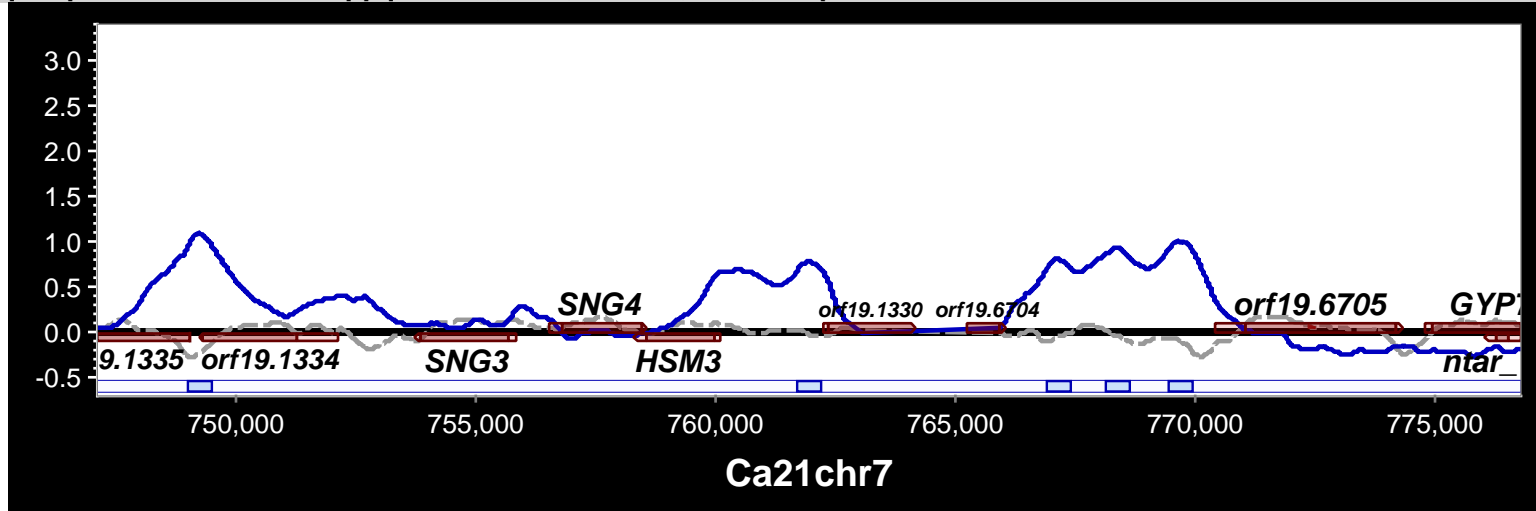

[0.77] Ca21chr3:1310170-1339853 [+] [orf19.7371, orf19.7370, orf19.7369, MRR1, orf19.7368]

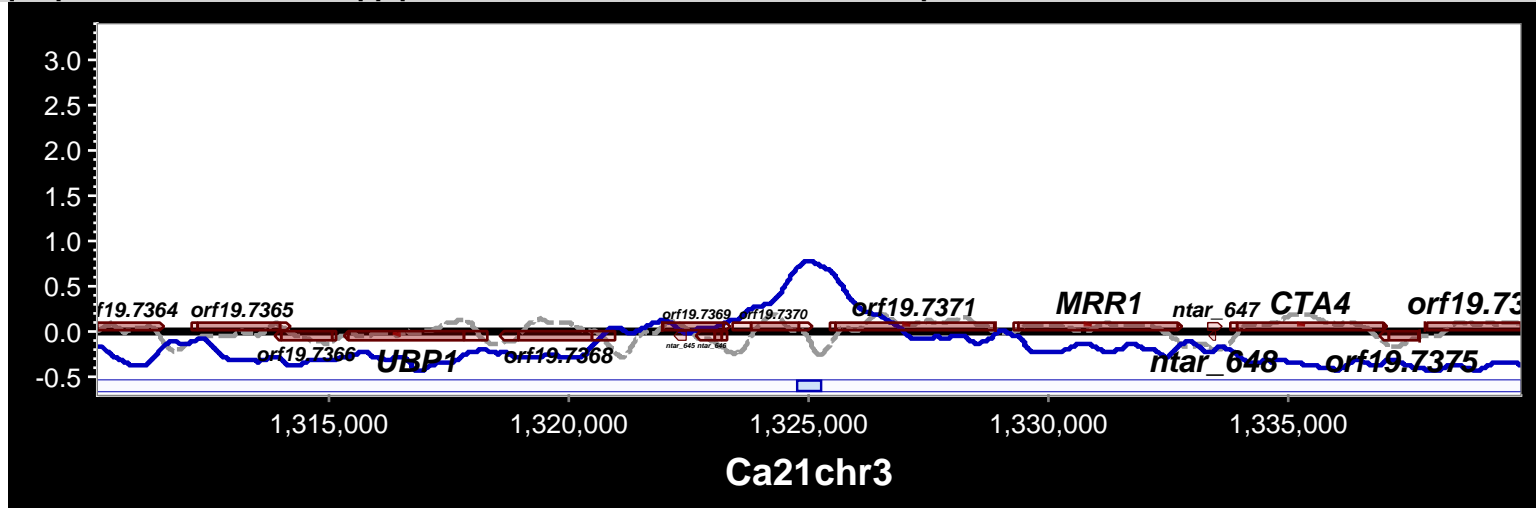

[0.767] Ca21chr3:1466287-1495970 [+] [orf19.7437, ECM15, UBA1, AAF1, HST6]

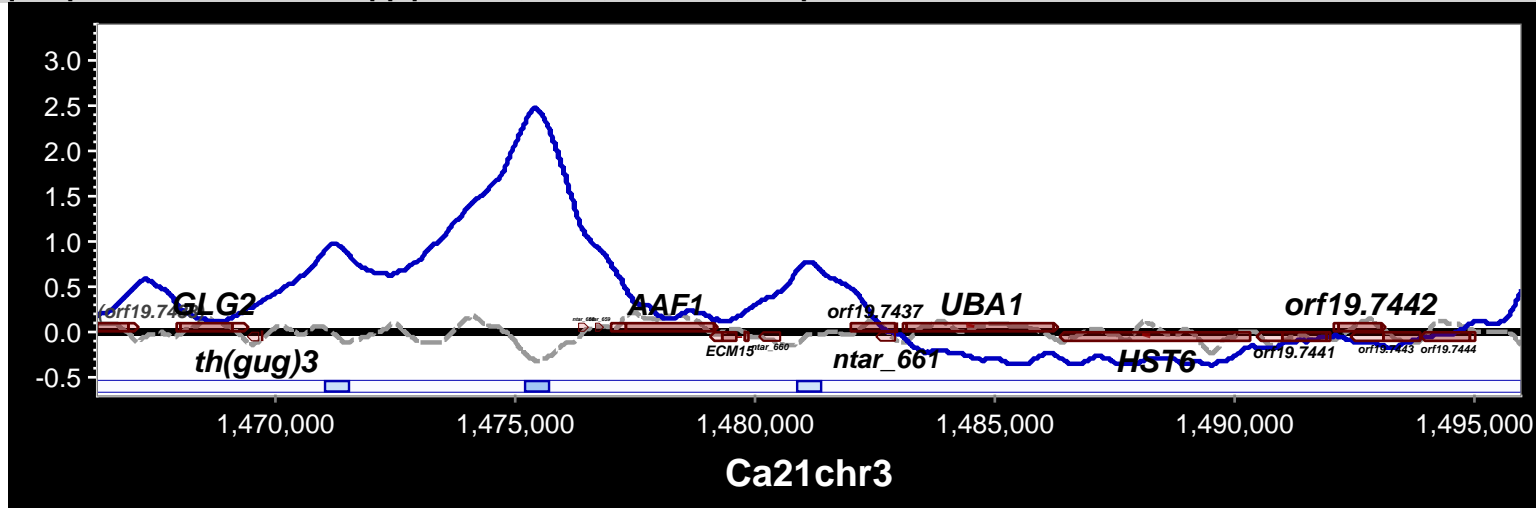

[0.767] Ca21chr5:94716-124399 [+] [AGA1, orf19.936, orf19.938, orf19.934, orf19.933]

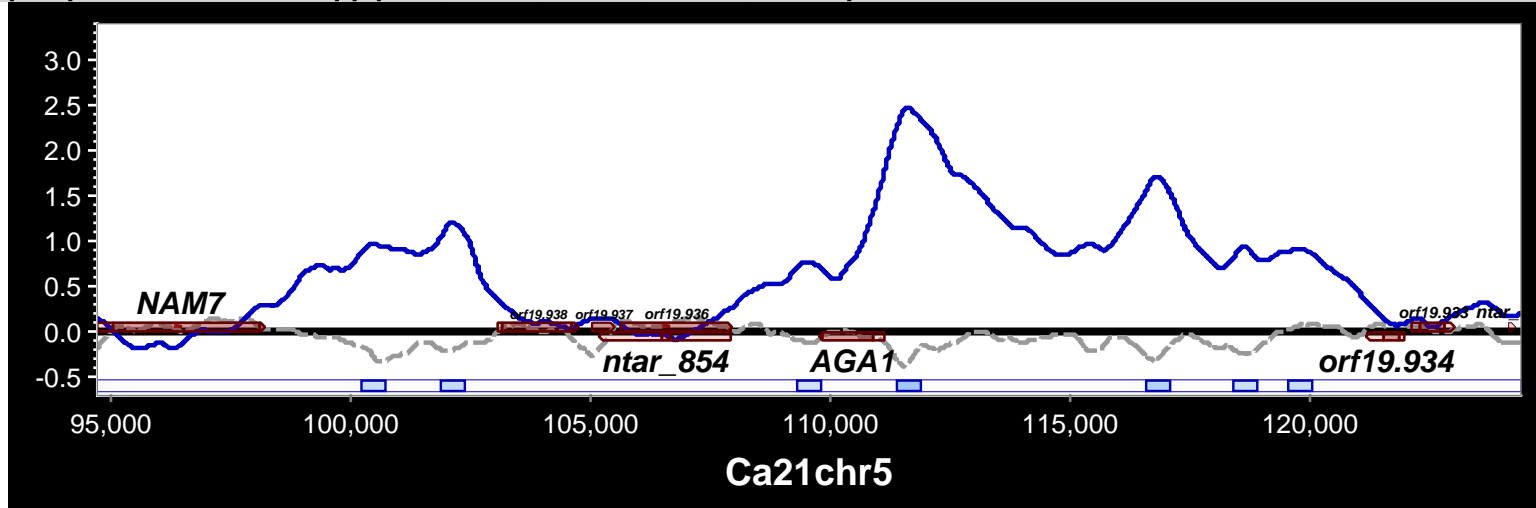



[0.767] Ca21chr5:190265-219948 [+] [GIT1, GIT2, GIT4, URA4, orf19.1981]

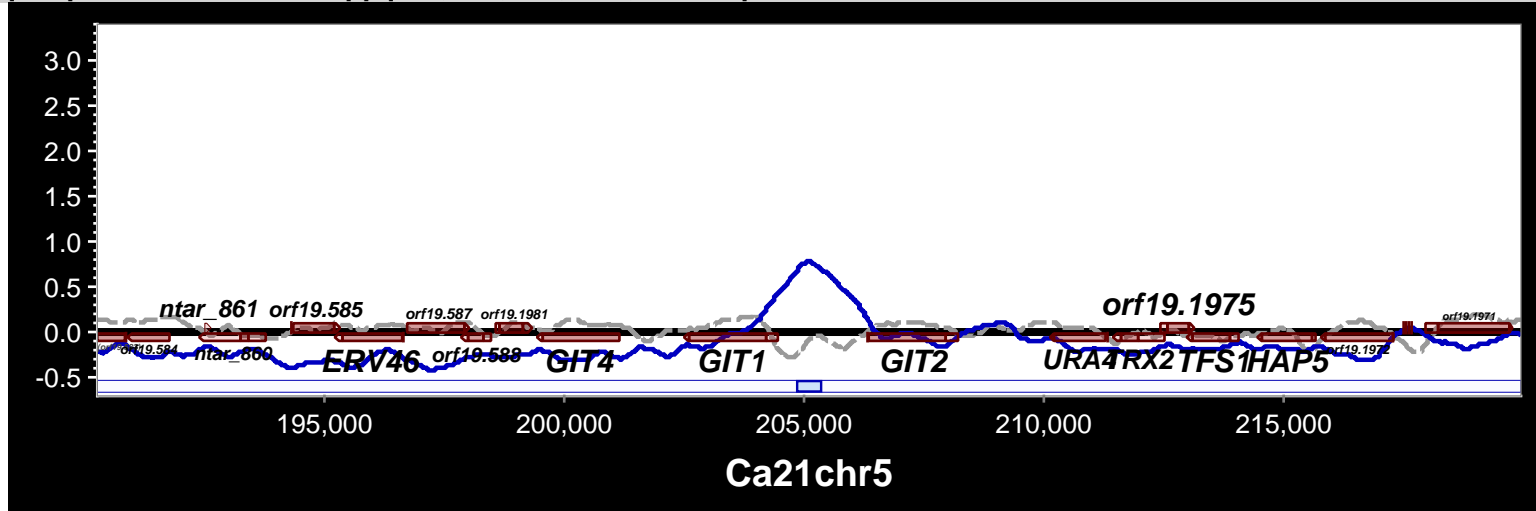

[0.766] Ca21chr1:3055704-3085387 [+] [SSK1, SIM1, orf19.5030, MODF, orf19.5033]

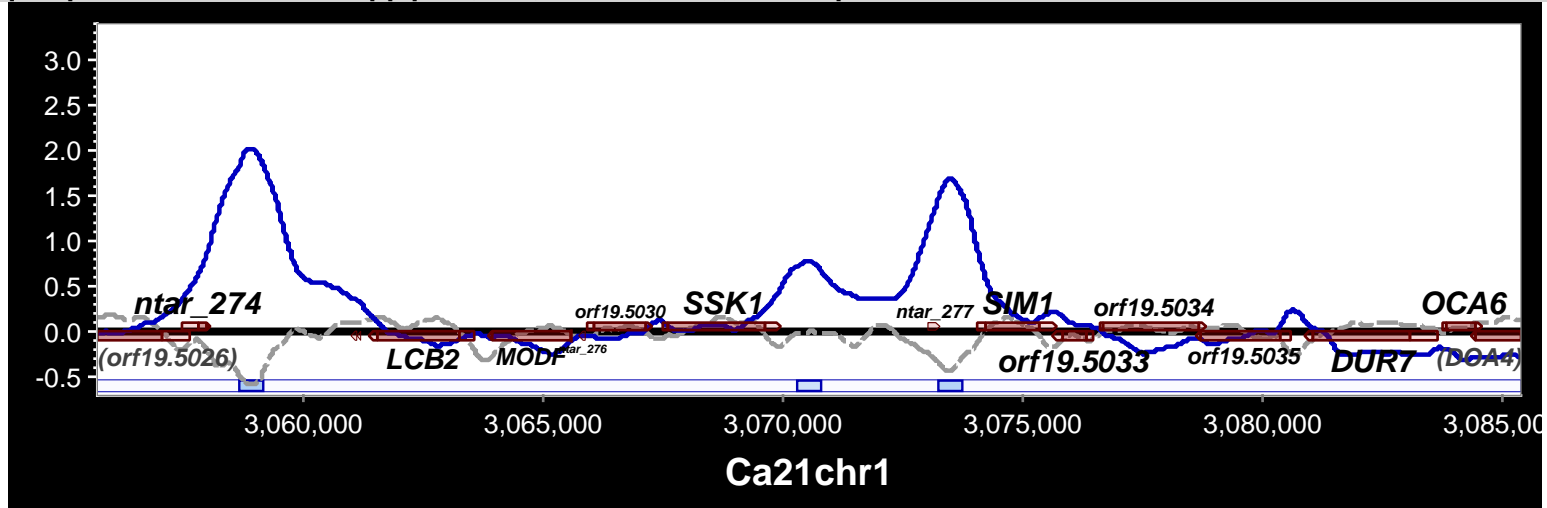

[0.762] Ca21chr2:1159730-1189413 [+] [orf19.6886, orf19.6887, SPO7, orf19.6884, orf19.6888]

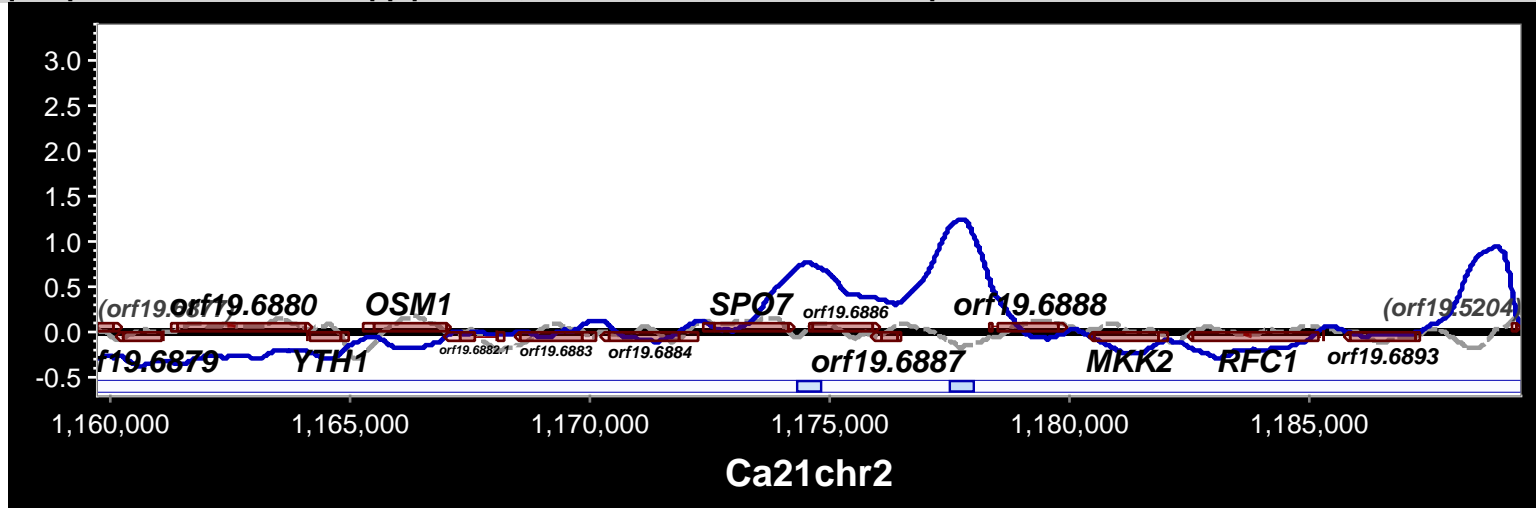

[0.762] Ca21chr2:2018308-2047991 [+] [FCY21, GCN4, orf19.1356, orf19.1359, orf19.1360]

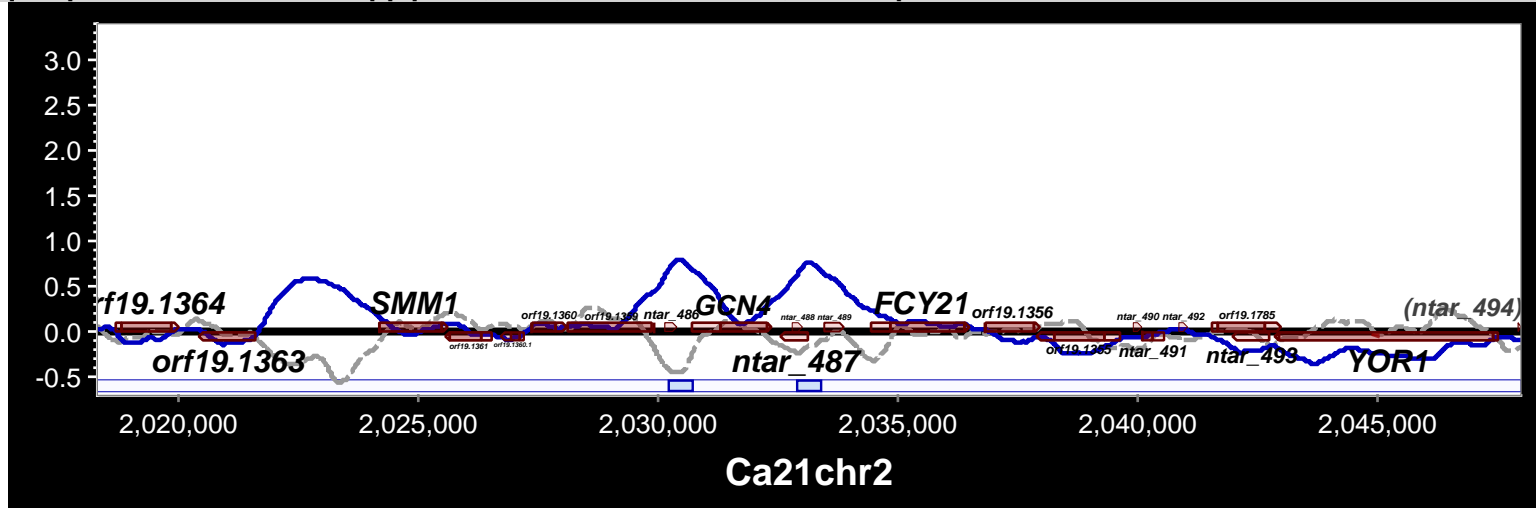

[0.758] Ca21chr3:856974-886657 [+] [orf19.5861.1, orf19.5862, KRE9, orf19.5860, orf19.5863]

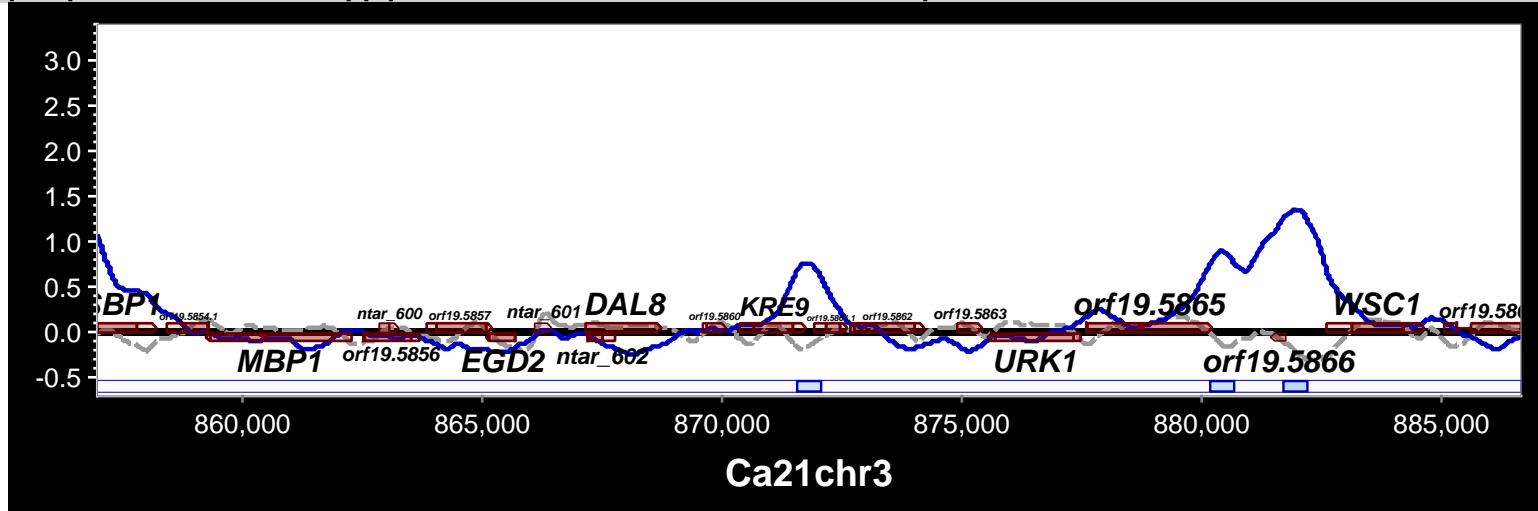

[0.758] Ca21chr7:1026-30709 [+] [SOD3, orf19.7111, orf19.7110, FRP2, CSA1]

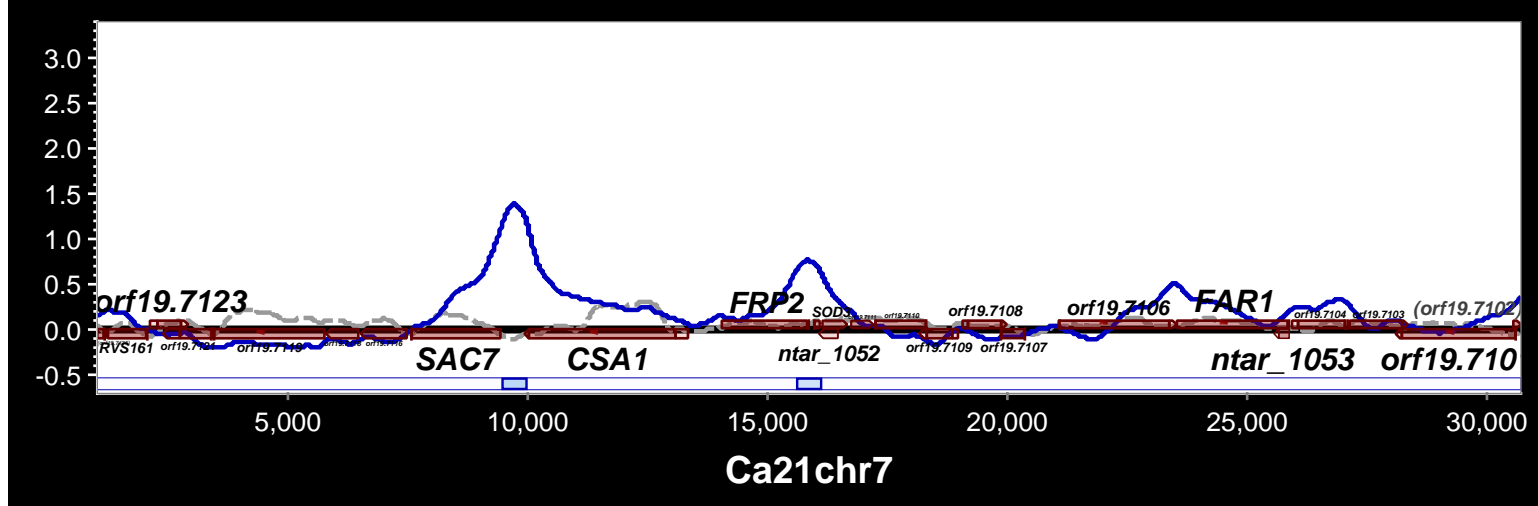

[0.754] Ca21chr4:905832-935515 [+] [COX11, orf19.1417, FRE10, SEC15, orf19.1420]

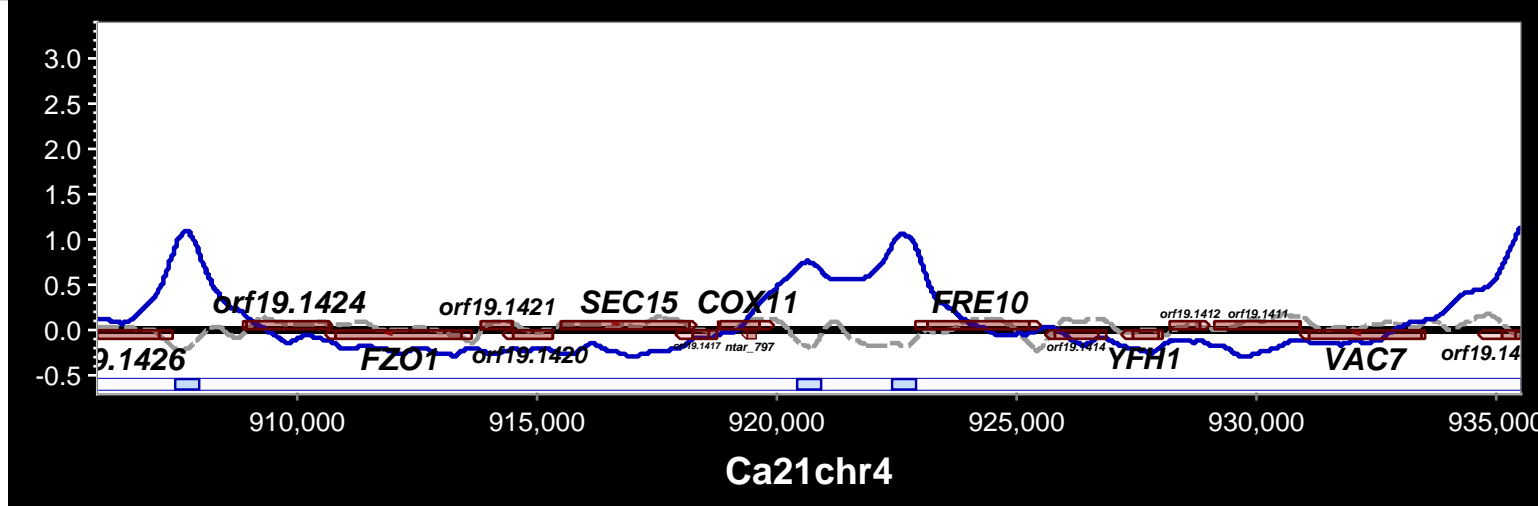

[0.748] Ca21chr4:706780-736463 [+] [DOT4, orf19.3371, MOH1, orf19.3373, ECE1]

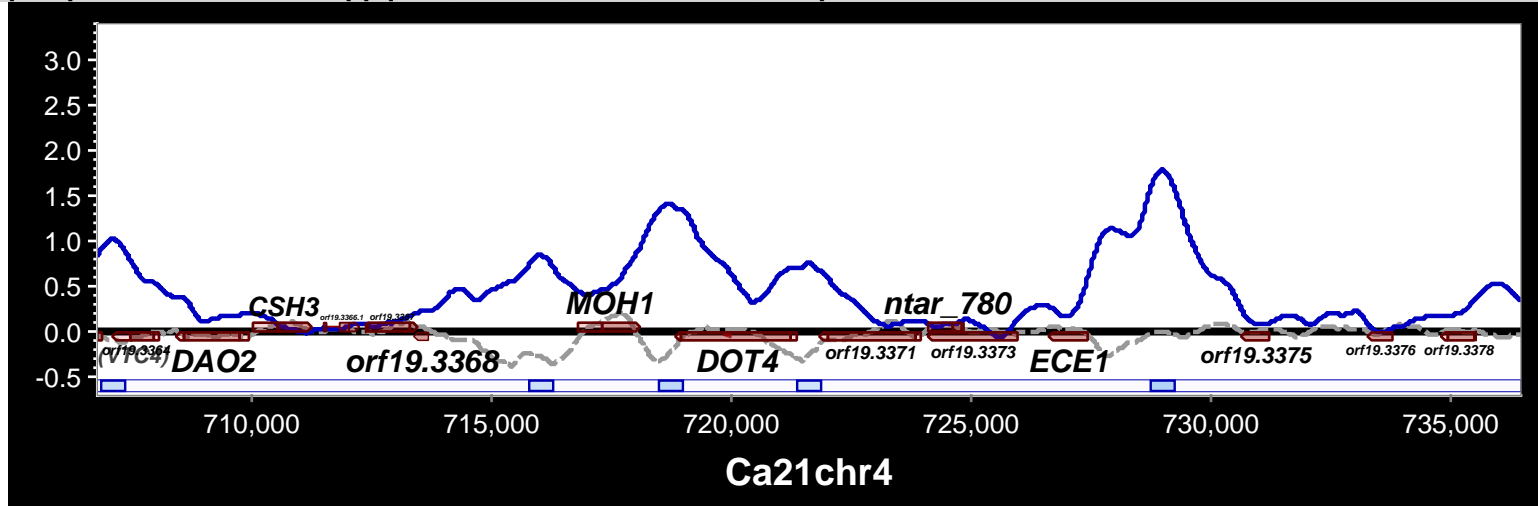

[0.745] Ca21chr1:2242785-2272468 [+] [TPK1, CLA4, orf19.4893, orf19.4894, orf19.4895]

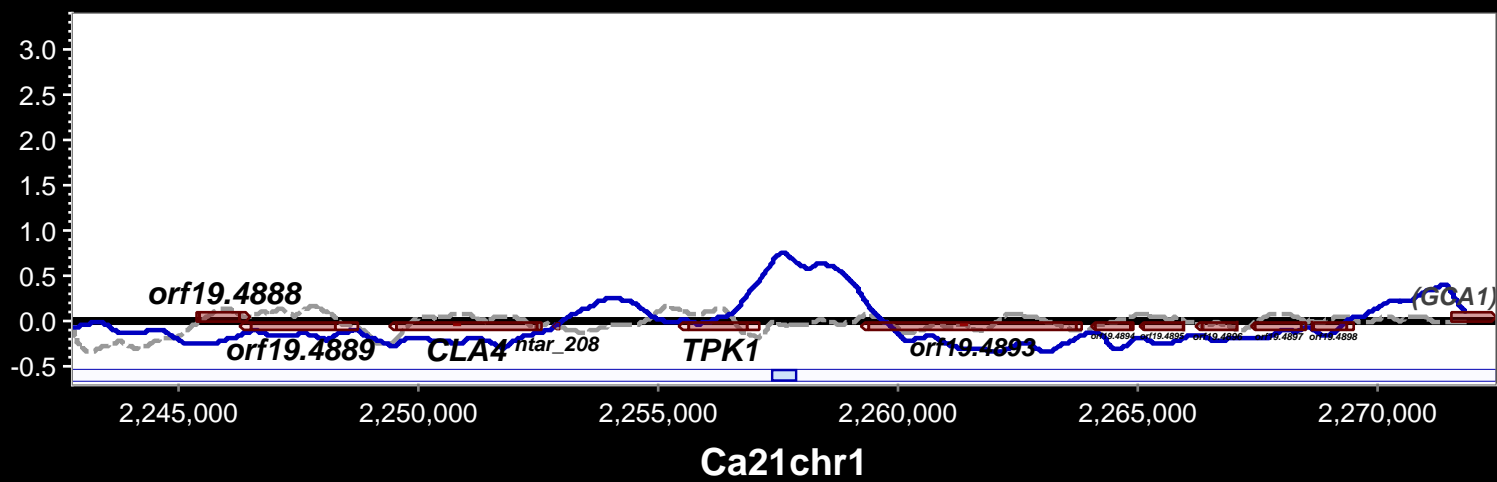

[0.74] Ca21chr1:2117121-2146804 [+] [MLS1, orf19.4831, orf19.4834, orf19.4830, orf19.4835]

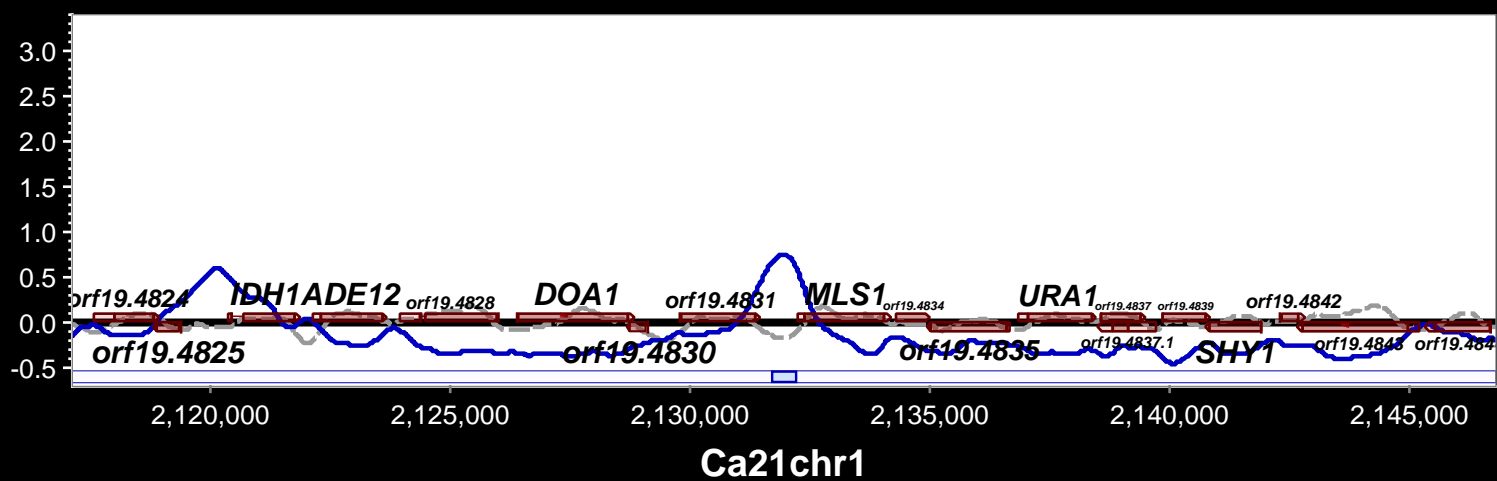

[0.738] Ca21chrR:1532491-1562174 [+] [FLC2, orf19.8, orf19.9, orf19.1814, orf19.1815]

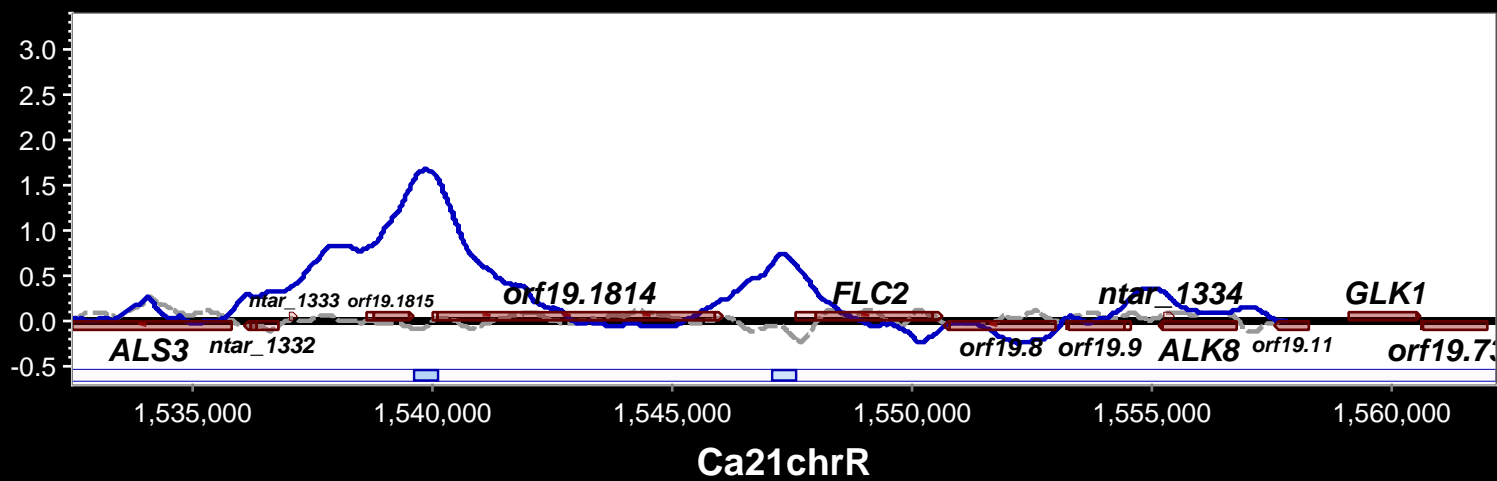

[0.737] Ca21chrR:2106157-2135840 [+] [orf19.7566, GNP3, orf19.7567, DPB2, orf19.7568]

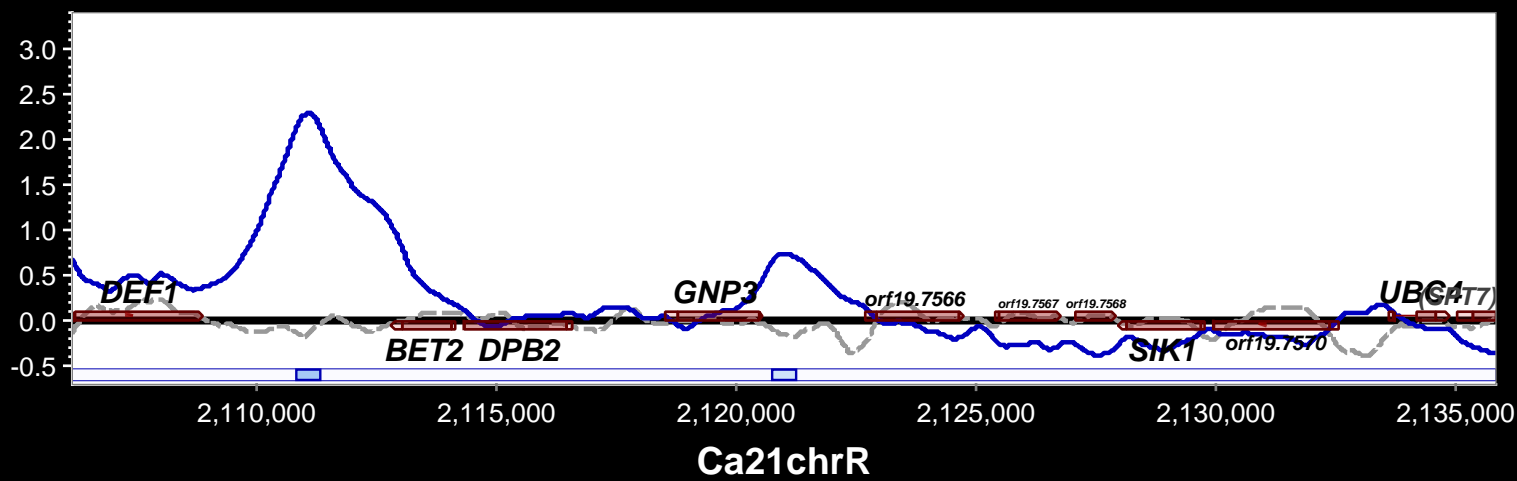

[0.736] Ca21chr6:130267-159950 [+] [orf19.3644, CTR1, orf19.3643, orf19.3647, orf19.3648]

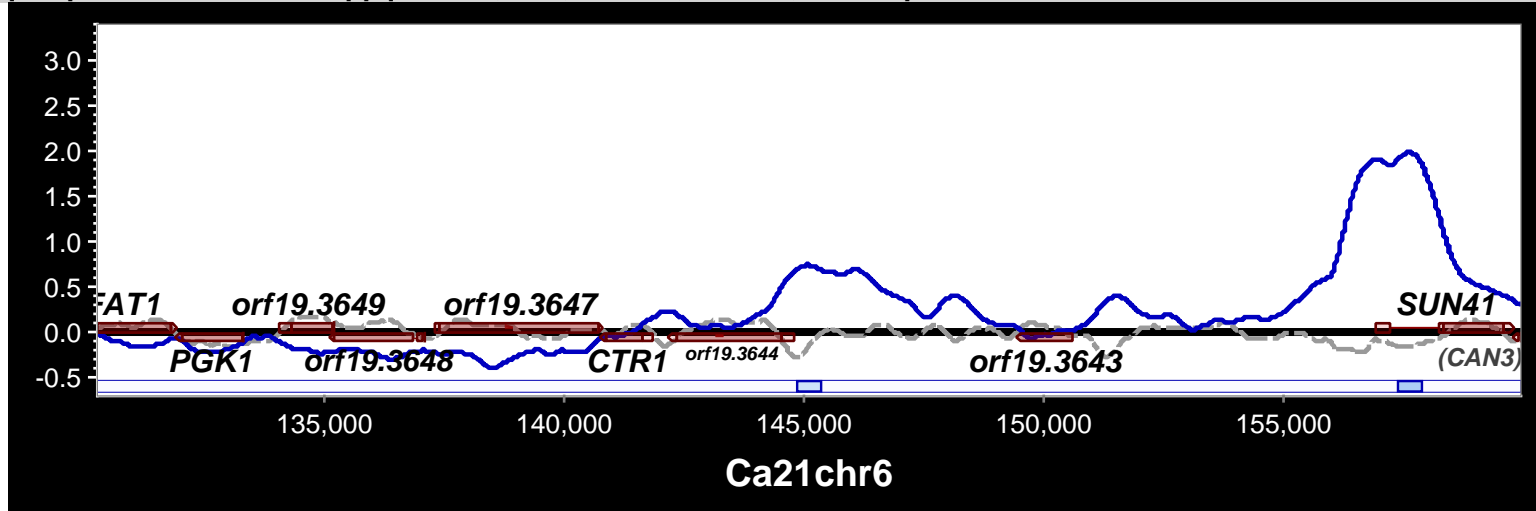

[0.734] Ca21chr2:730392-760075 [+] [orf19.867, ADAEC, RAD32, orf19.864, orf19.863]

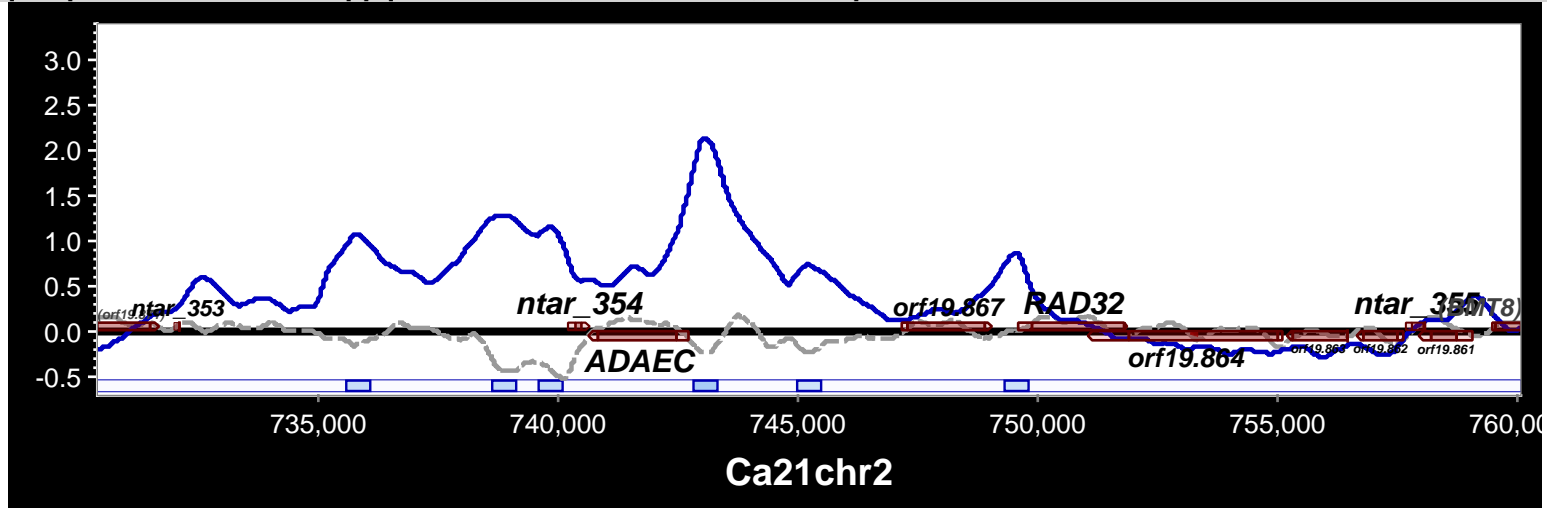

[0.733] Ca21chr3:615539-645222 [+] [orf19.288, orf19.287, orf19.286, KRE5, orf19.285]

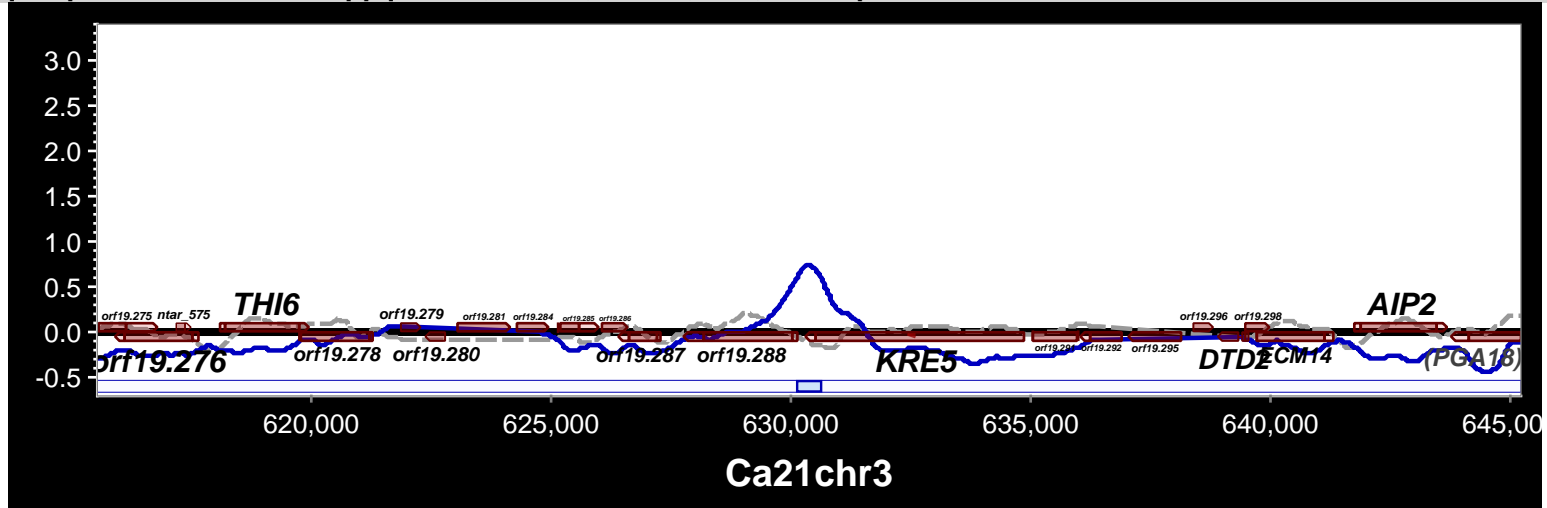

[0.729] Ca21chr1:1382639-1412322 [+] [GLT1, orf19.6259, orf19.6260, orf19.6255, BPH1]

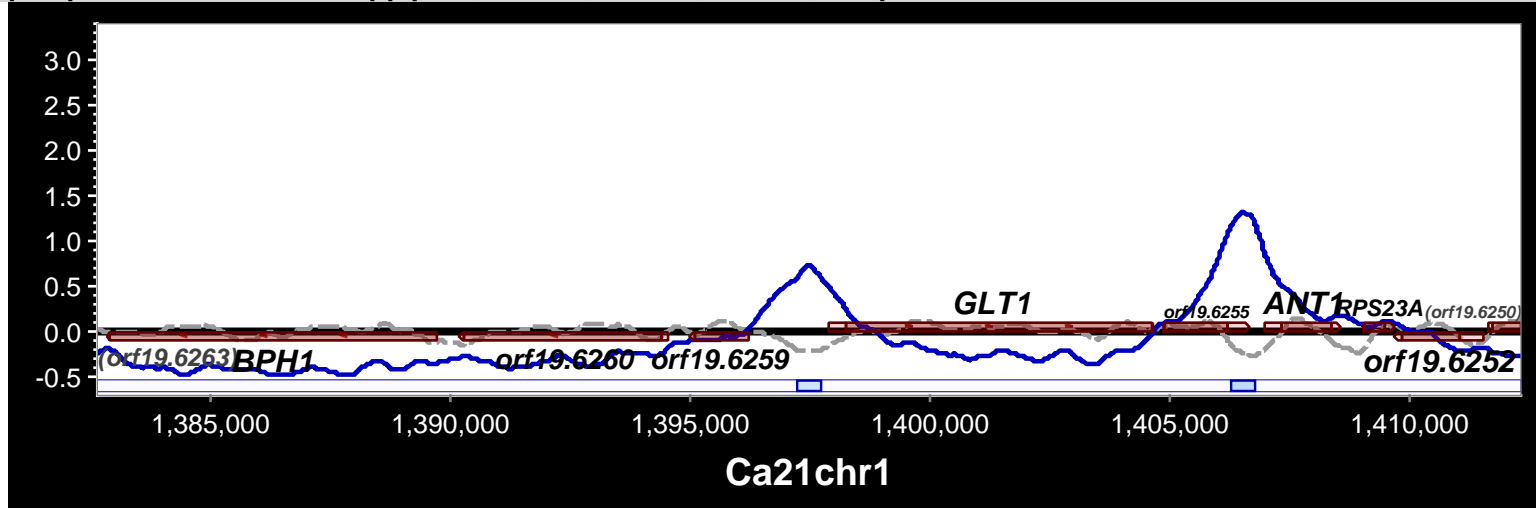

[0.725] Ca21chr7:55585-85268 [+] [orf19.7077, orf19.7078, orf19.7079, orf19.7076, orf19.7074]

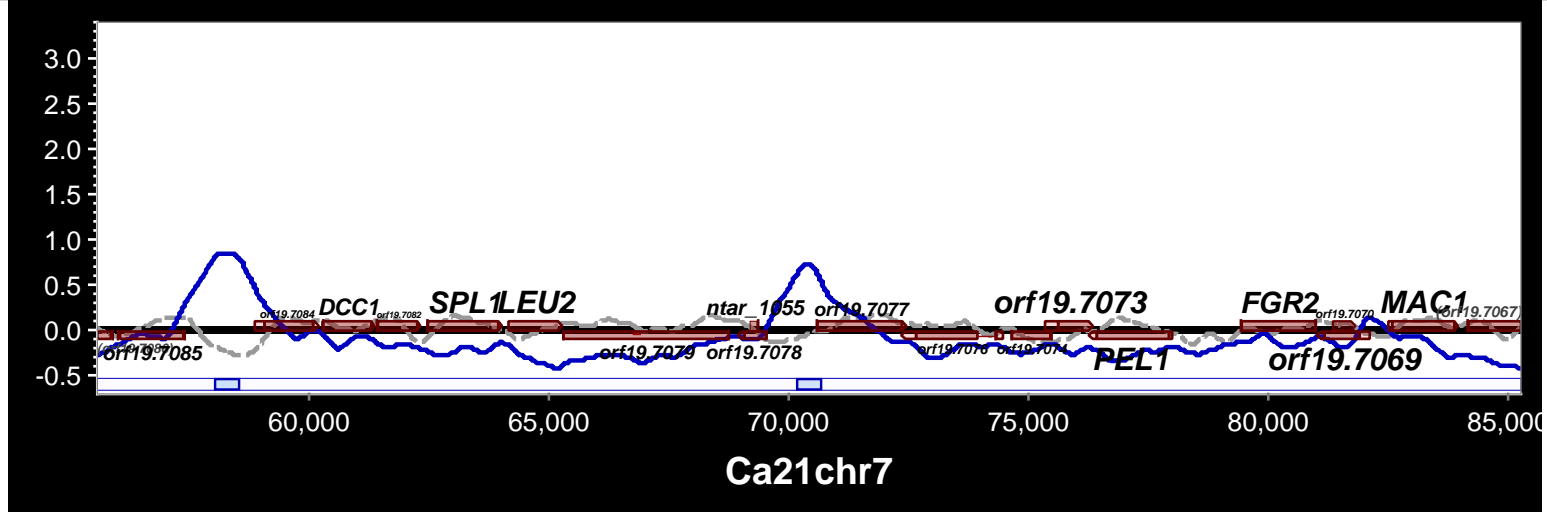

[0.725] Ca21chrR:267040-296723 [+] [orf19.3232, orf19.3233, OYE22, SFT1, orf19.3235]

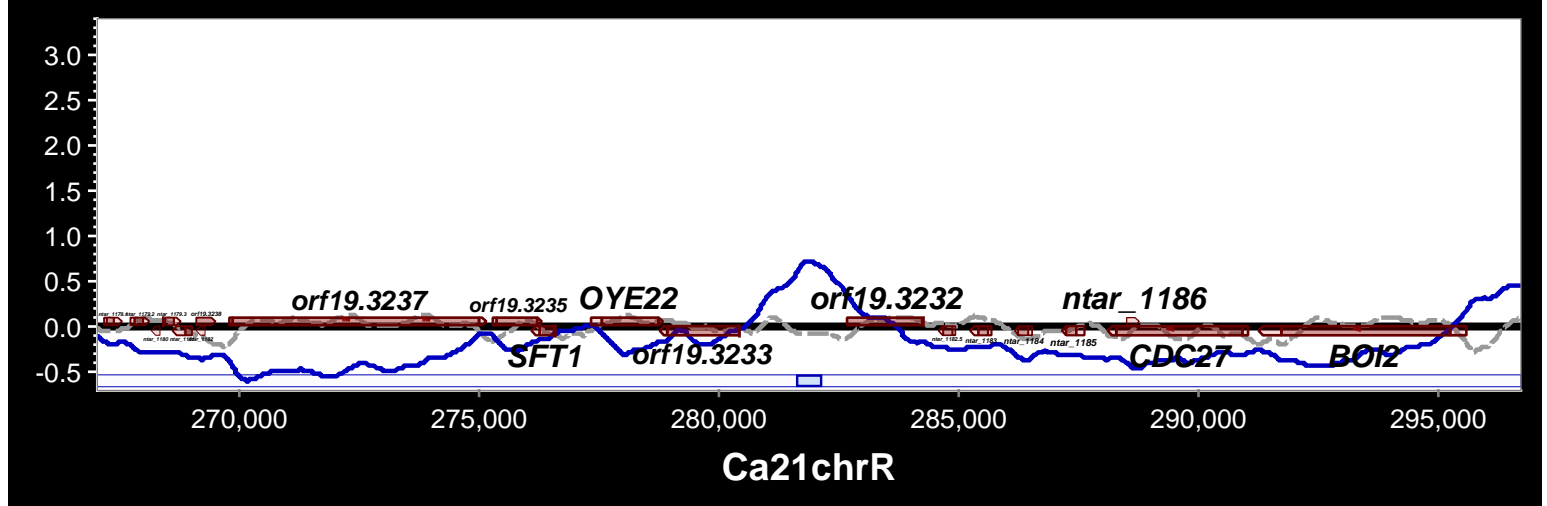

[0.717] Ca21chr2:72725-102408 [+] [orf19.2072, orf19.2071, orf19.2073, orf19.2074, orf19.2070]

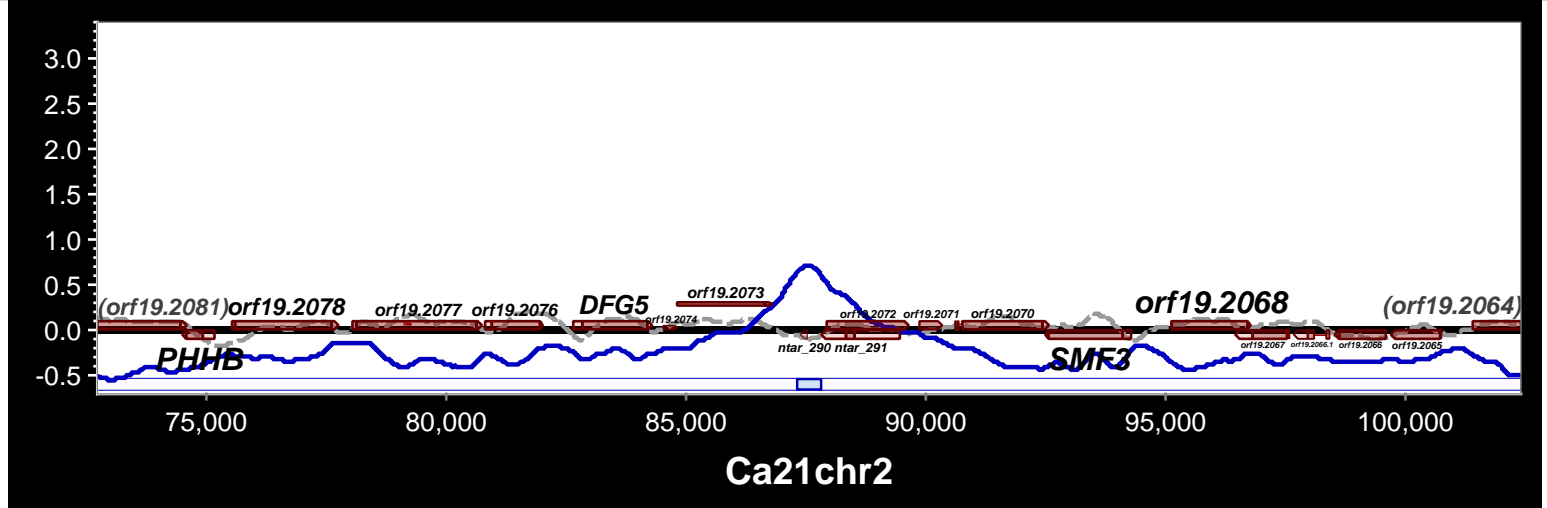

[0.715] Ca21chr2:214832-244515 [+] [SIR2, orf19.1991, orf19.1993, SNX4, orf19.1994]

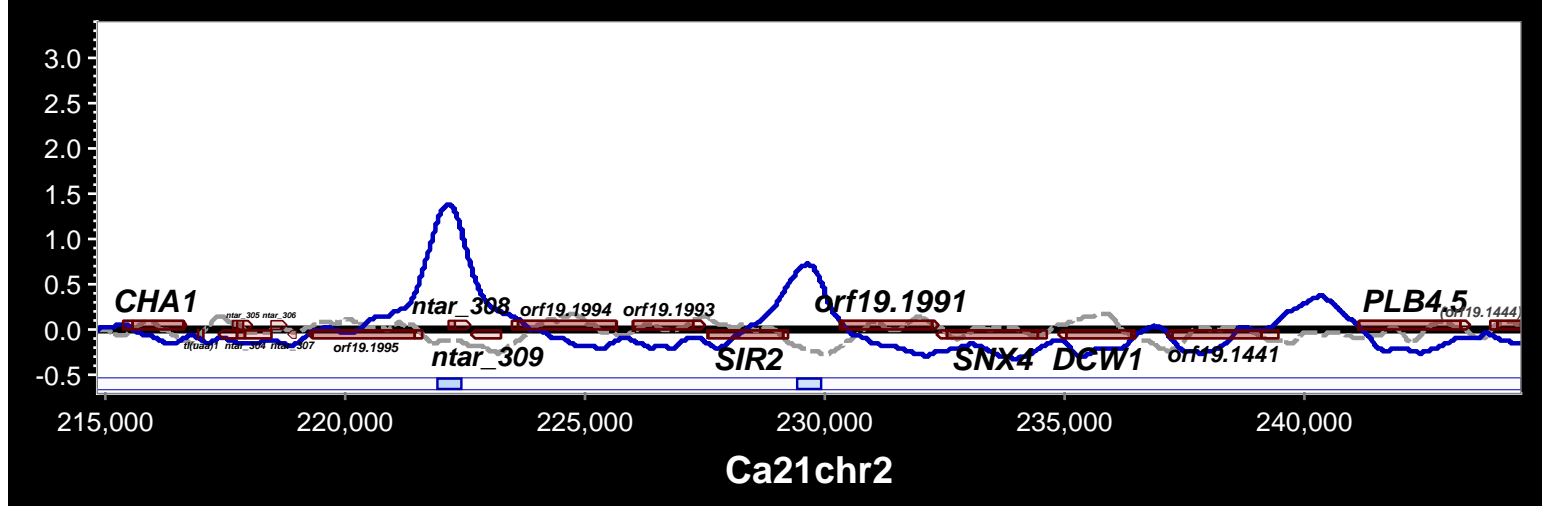

[0.708] Ca21chr1:716054-745737 [+] [orf19.3048, orf19.3049, orf19.3047, AGE1, orf19.3051]

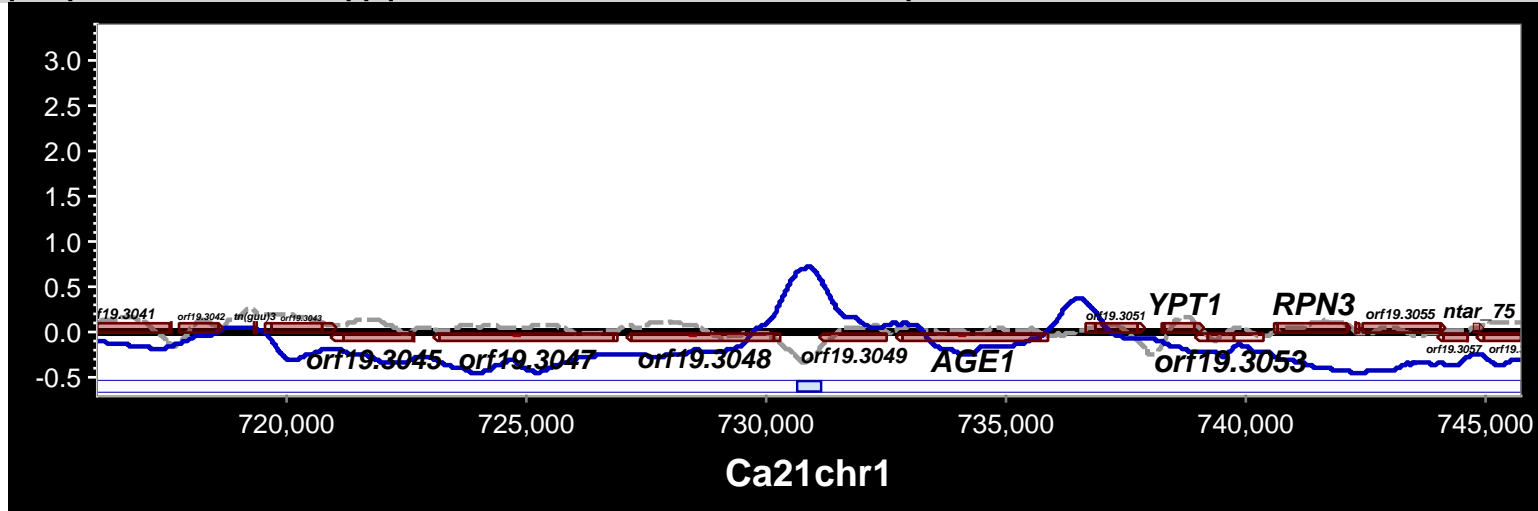

[0.707] Ca21chrR:2001280-2030963 [+] [orf19.7341.1, AXL1, orf19.7343, tD(GUC)7, orf19.7344]

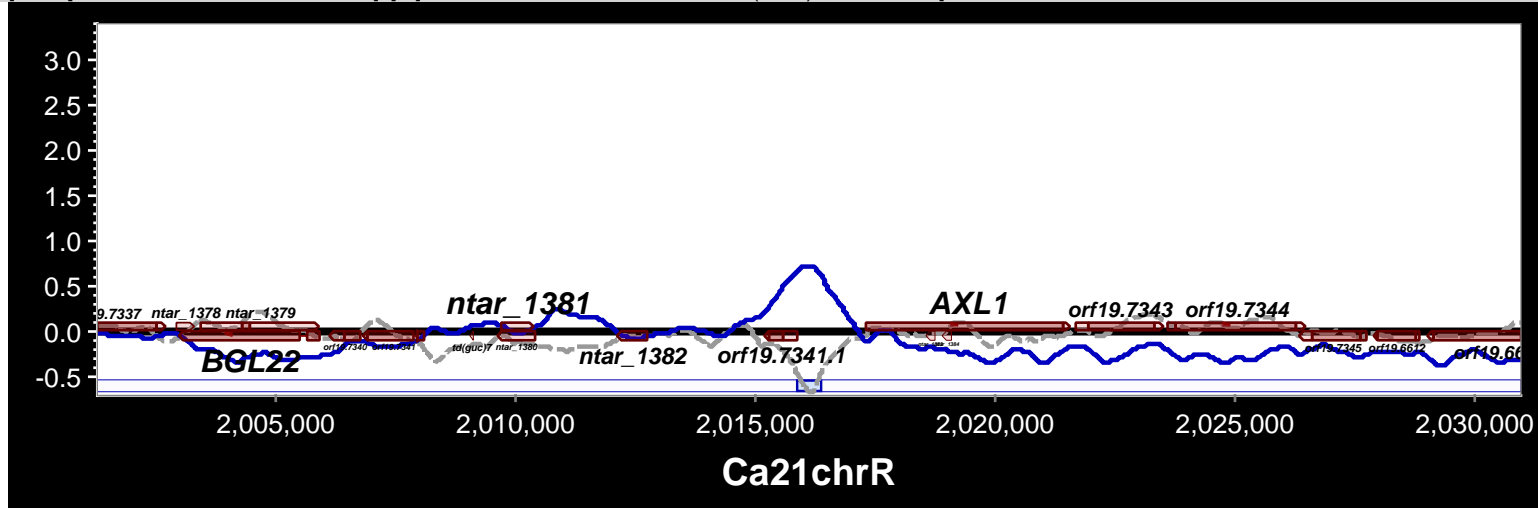

[0.702] Ca21chr3:113402-143085 [+] [CHS8, PMA1, orf19.5381, VPS8, SWD1]

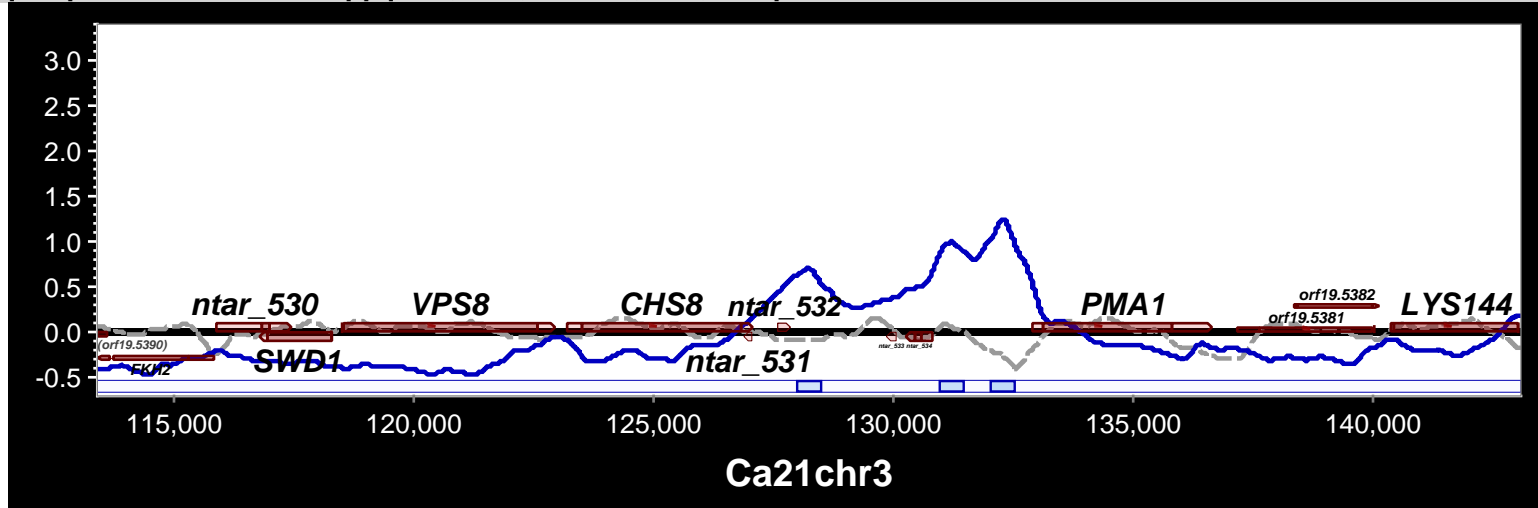

[0.693] Ca21chr6:16705-46388 [+] [CPH2, orf19.1186, orf19.1185, orf19.1183, orf19.1182]

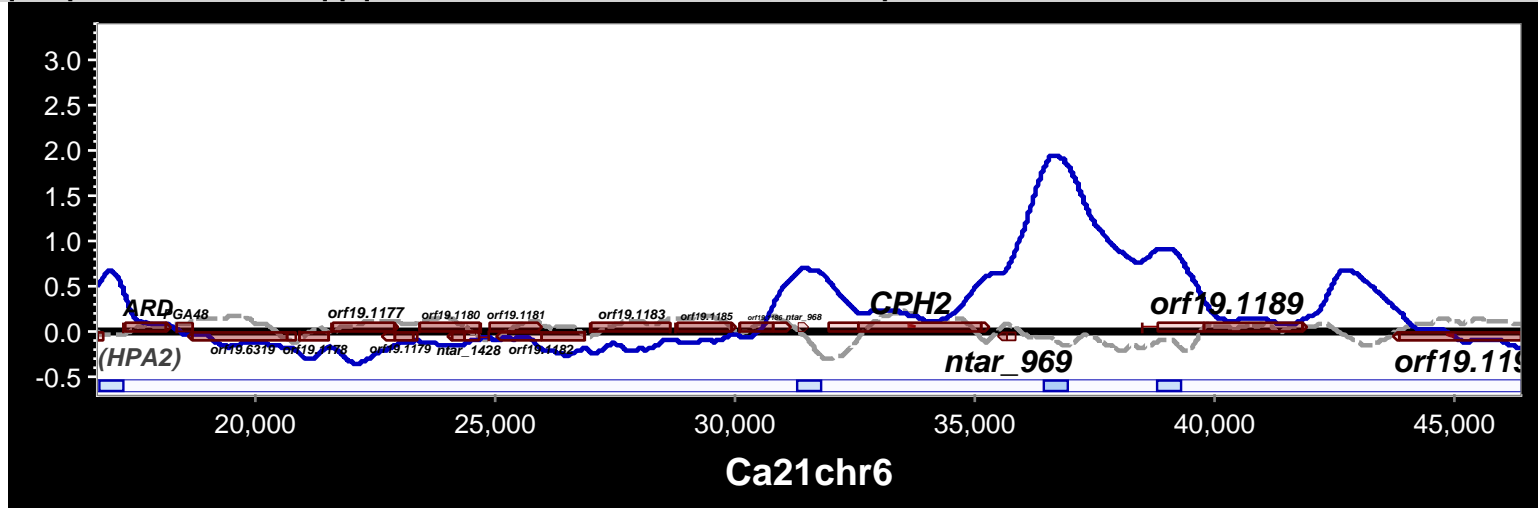

[0.692] Ca21chr3:1383644-1413327 [+] [orf19.7397, orf19.7396, orf19.7395, GDA1, orf19.7393]

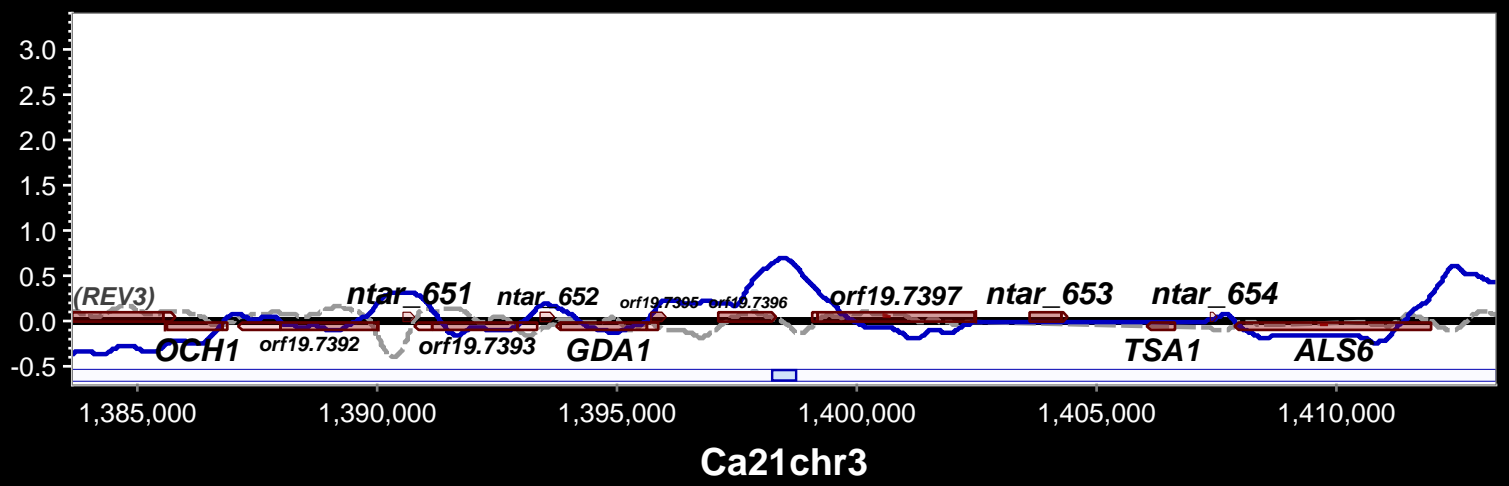

[0.692] Ca21chr3:1399347-1429030 [+] [ALS6, MMS21, MUB1, OAC1, orf19.7410]

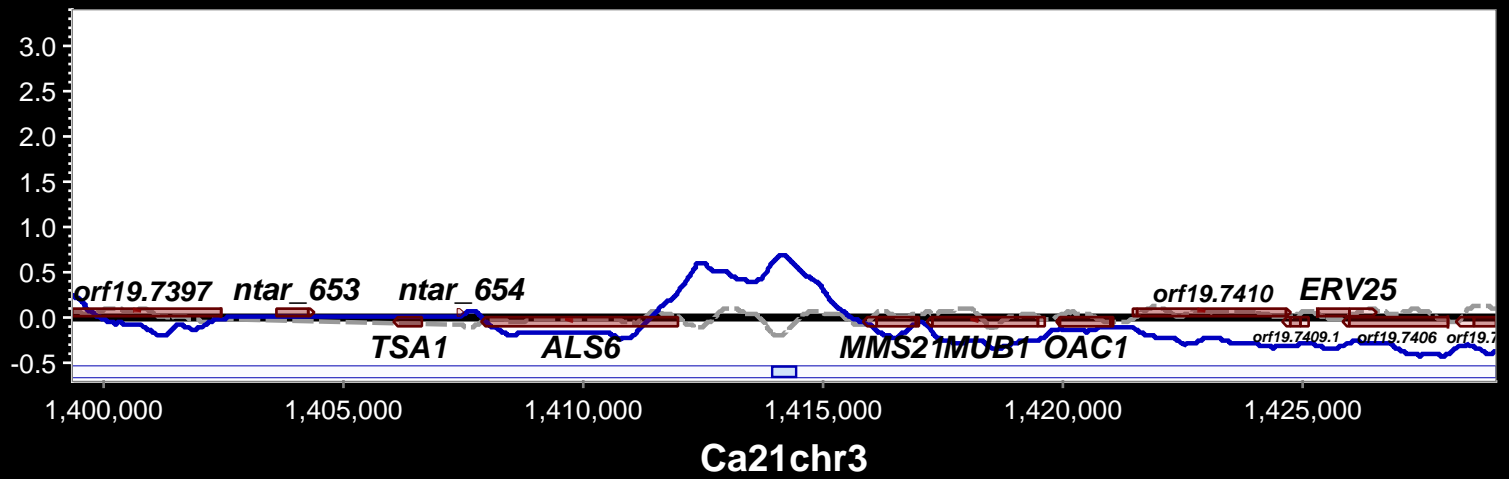

[0.692] Ca21chrR:1684848-1714531 [+] [orf19.3711, YHB5, orf19.3712, orf19.3713, SAP2]

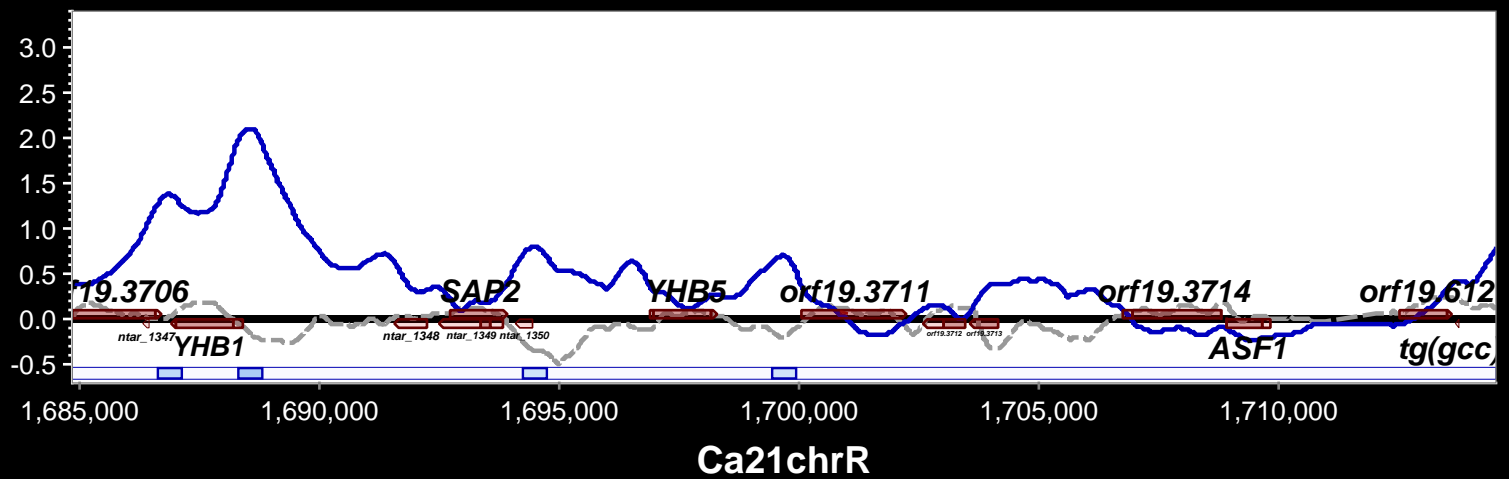

[0.686] Ca21chr5:907524-937207 [+] [CHT2, orf19.3897, orf19.3894, orf19.3898, SDC1]

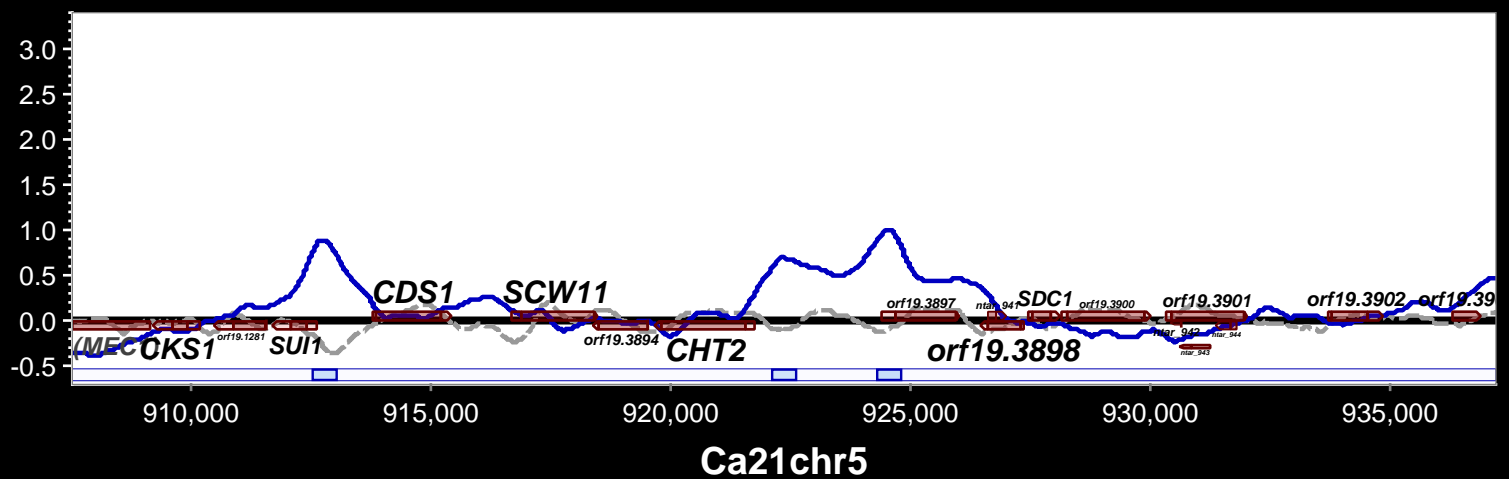

[0.685] Ca21chr1:1048386-1078069 [+] [GPT1, GPI7, orf19.4062, orf19.4061, REI1]

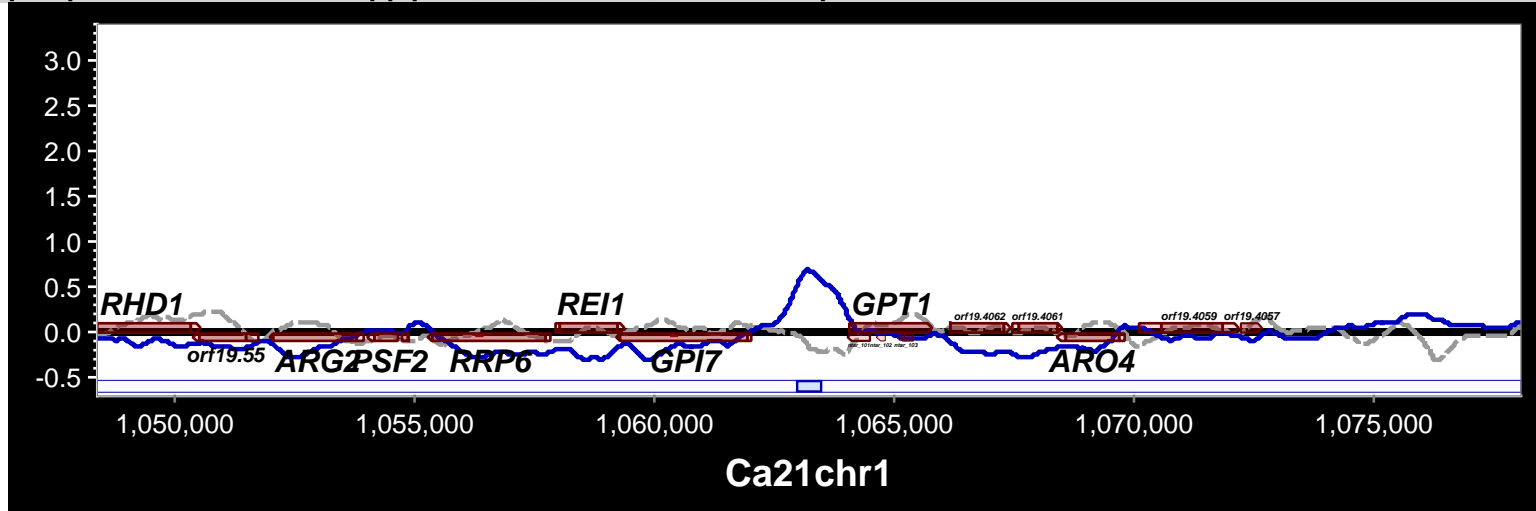

[0.685] Ca21chr3:1557064-1586747 [+] [orf19.6816, TDH3, FCR1, orf19.6813, PMT2]

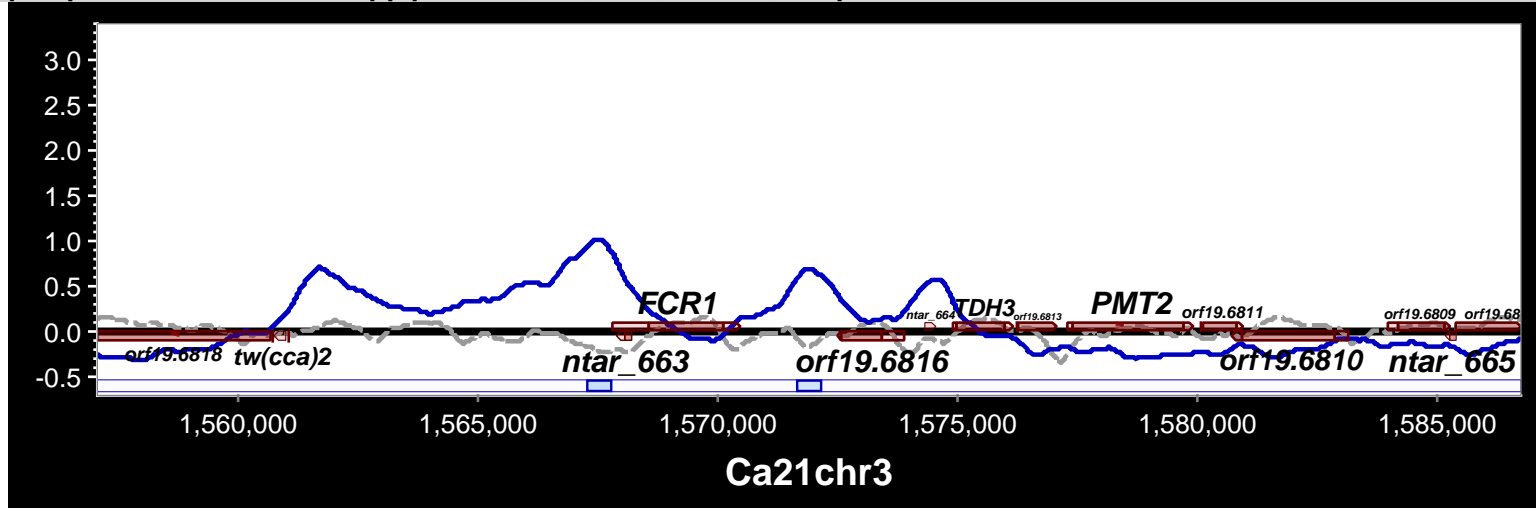

[0.684] Ca21chr4:945874-975557 [+] [SAP10, orf19.3840, EFB1, orf19.3836, orf19.3833]

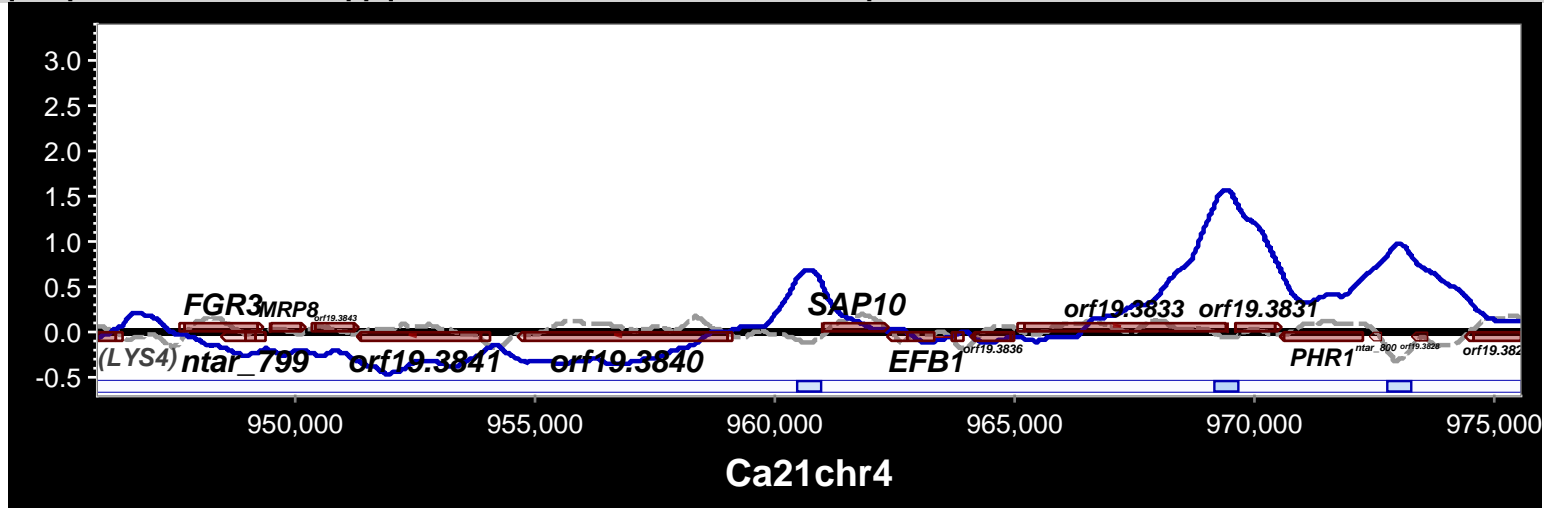

[0.683] Ca21chr3:1099904-1129587 [+] [WOR2, orf19.5991, orf19.5989, RHB1, orf19.5987]

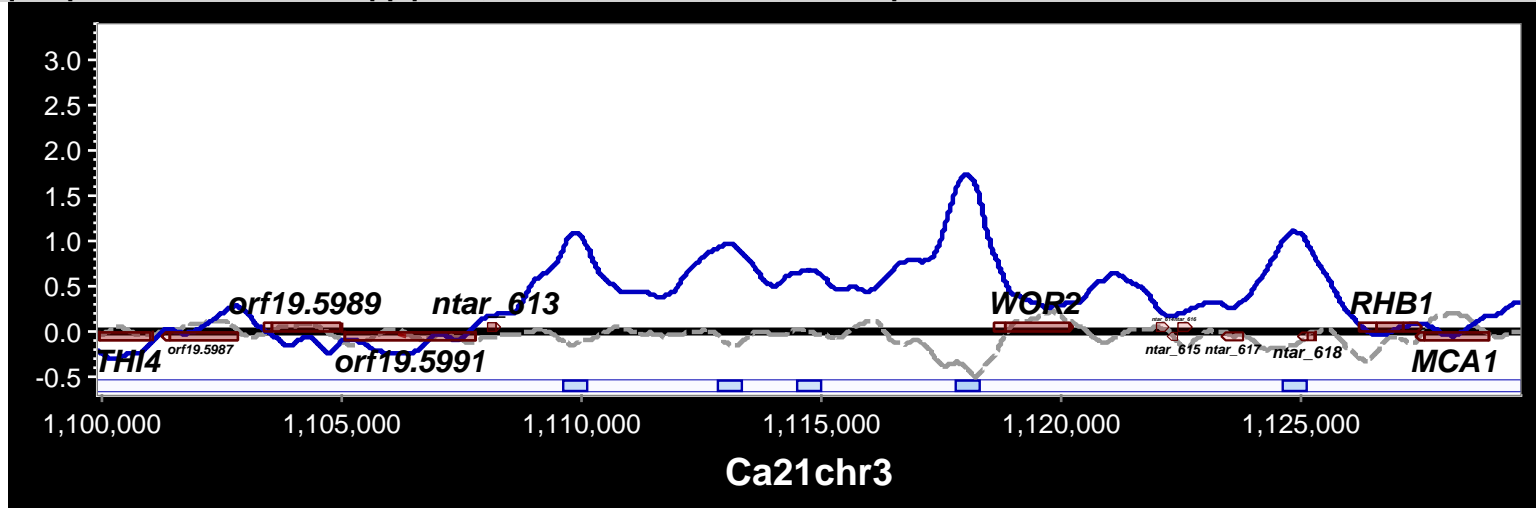



[0.681] Ca21chr7:784559-814242 [+] [orf19.6691, MNN7, orf19.6690, orf19.6693, ARG4]

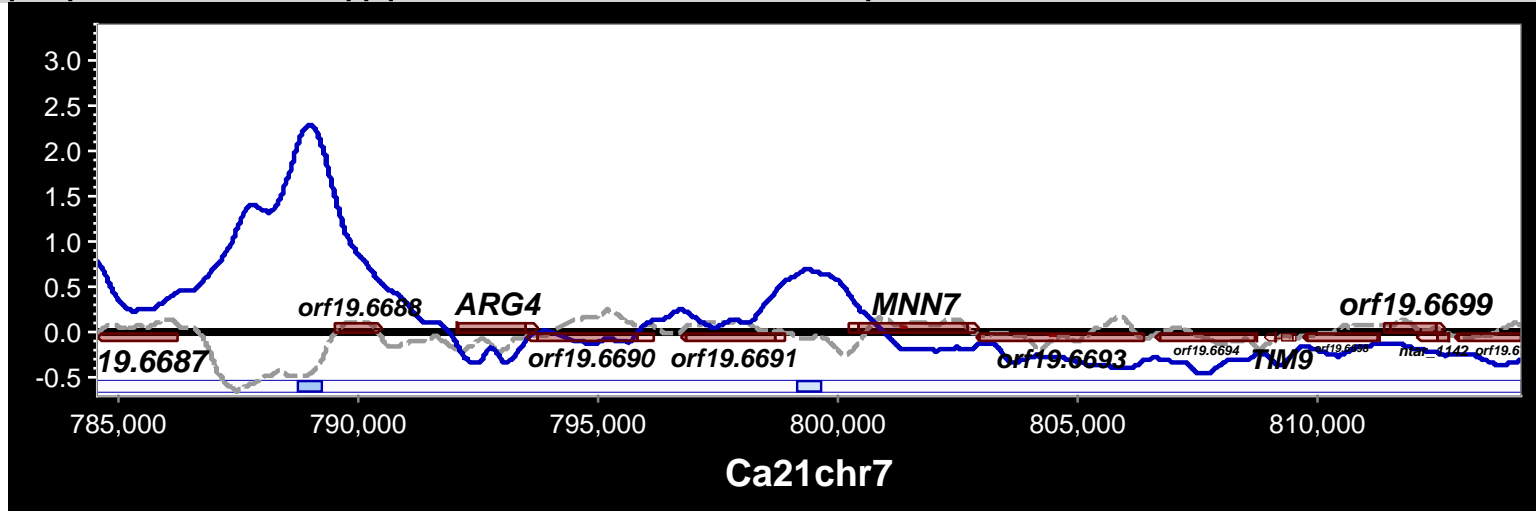

[0.674] Ca21chr3:978090-1007773 [+] [RPP2B, RPS15, ARG11, orf19.5929, orf19.5930]

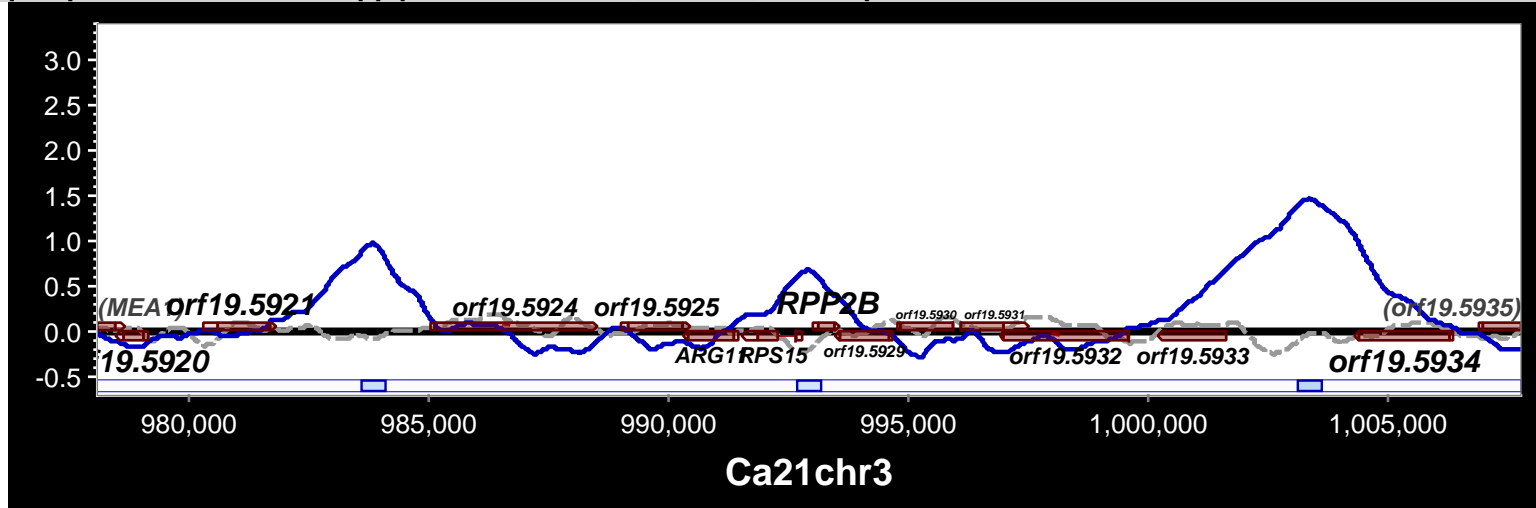

[0.673] Ca21chr4:1233848-1263531 [+] [orf19.1253, YME1, SEC23, BRN1, orf19.1255]

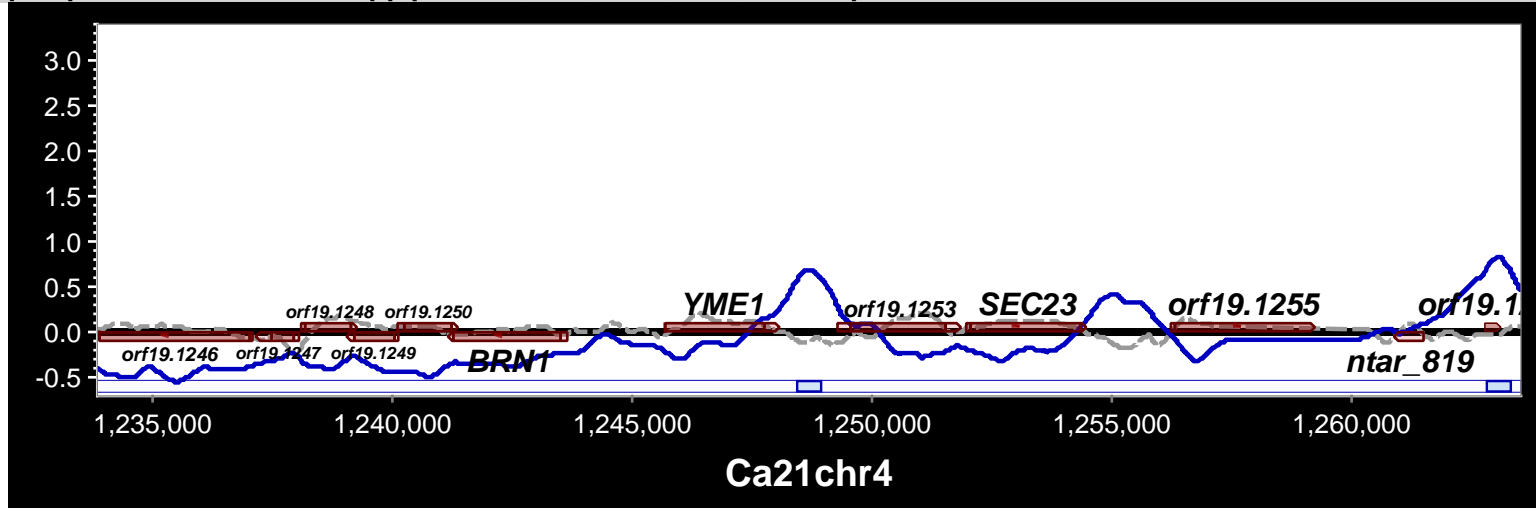

[0.673] Ca21chr6:2157-31840 [+] [ARD, HPA2, VID27, PGA48, orf19.6325.1]

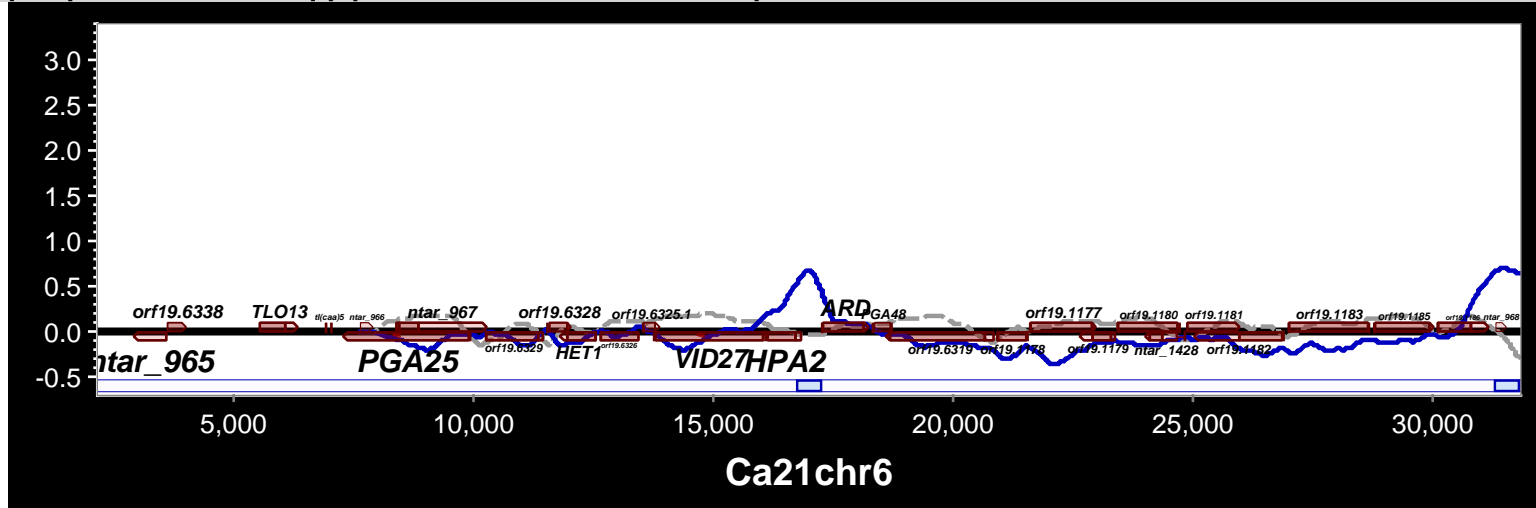

[0.661] Ca21chr2:154985-184668 [+] [HGT6, orf19.2019, HGT8, orf19.2018.1, orf19.2018.2]

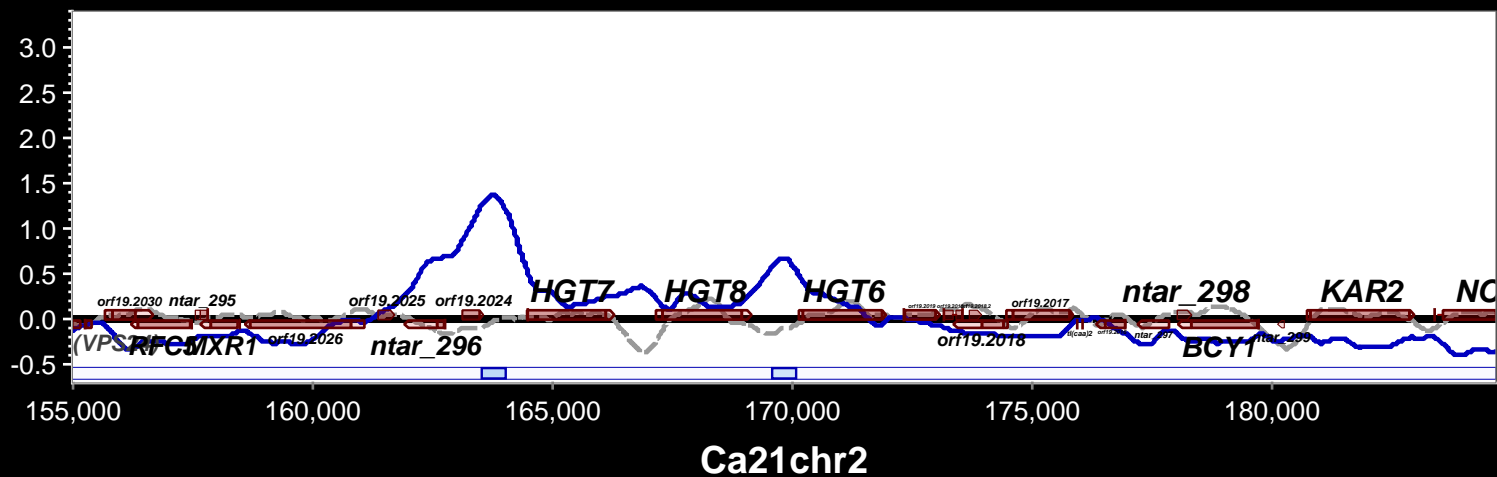

[0.652] Ca21chr2:668943-698626 [+] [CHK1, orf19.897, HEM2, orf19.899, orf19.900]

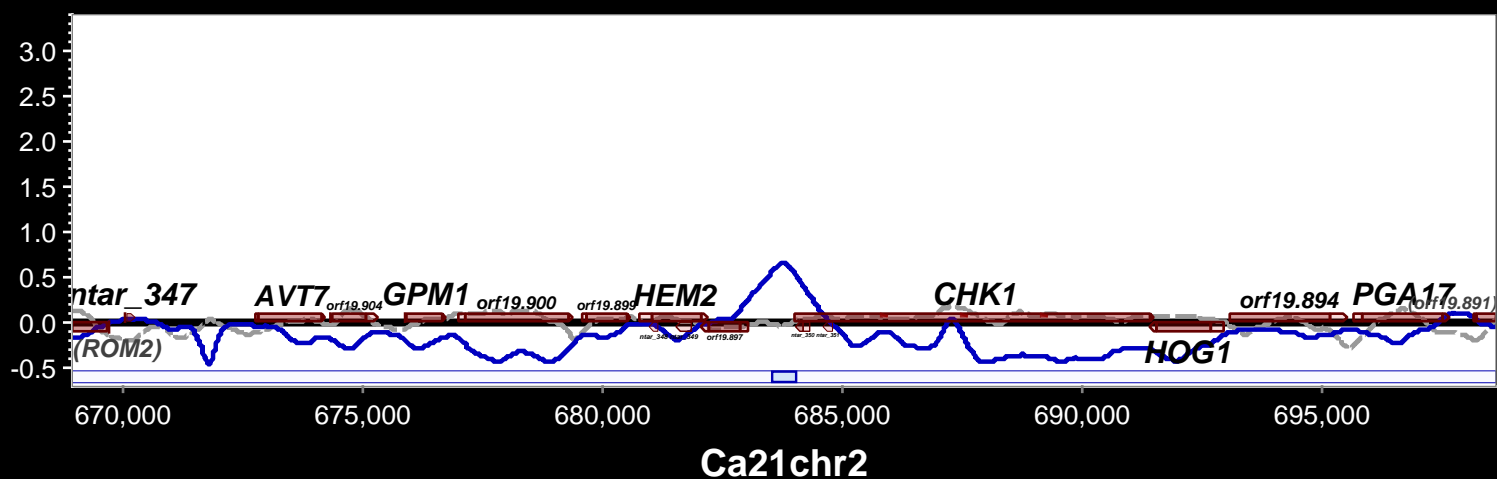

[0.632] Ca21chr4:101258-130941 [+] [orf19.4174, TOK1, orf19.4173, orf19.4176, orf19.4172]

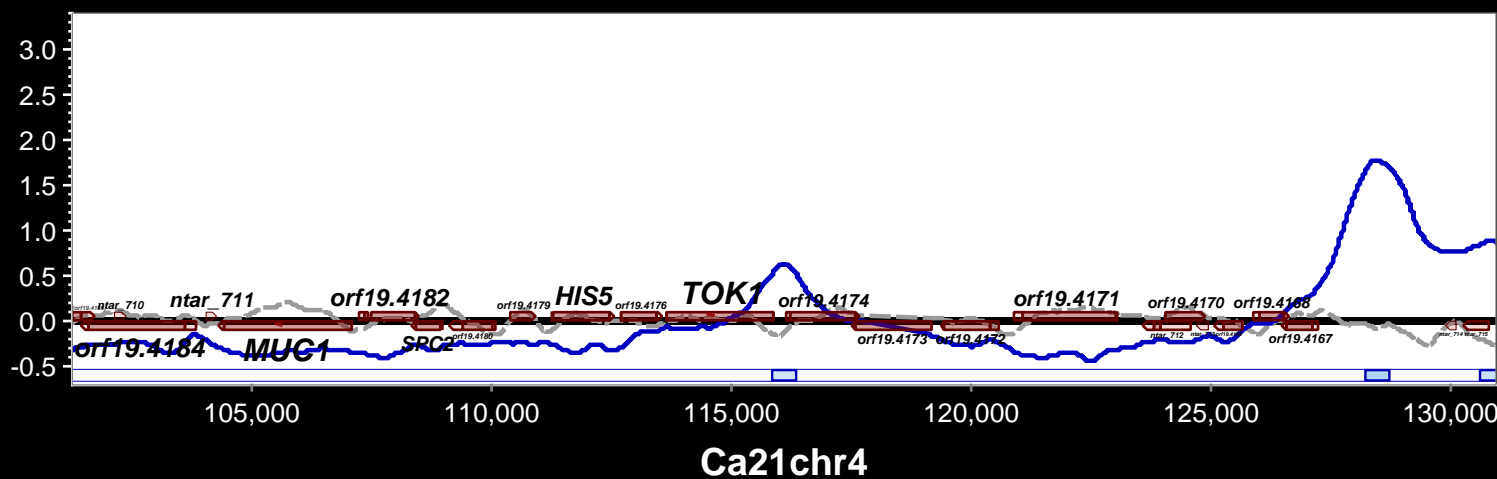

[0.631] Ca21chr2:1628100-1657783 [+] [orf19.2175, IFM3, RAD57, orf19.2177, orf19.2178]

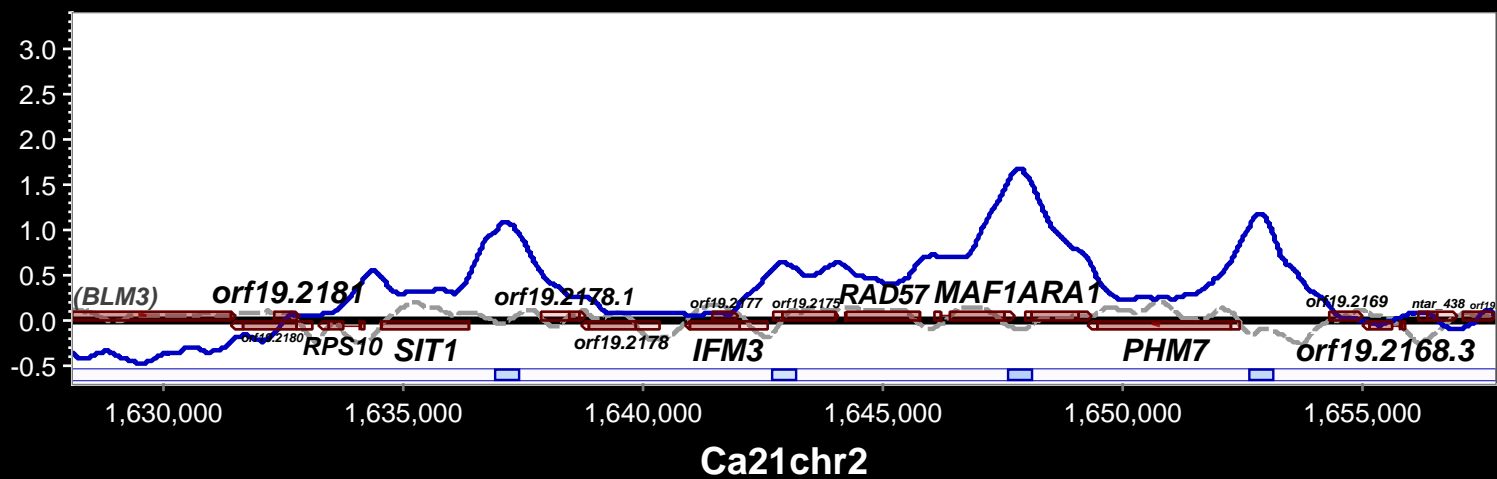

[0.631] Ca21chr7:313943-343626 [+] [BEM2, ALK6, FLU1, NUP, orf19.6569]

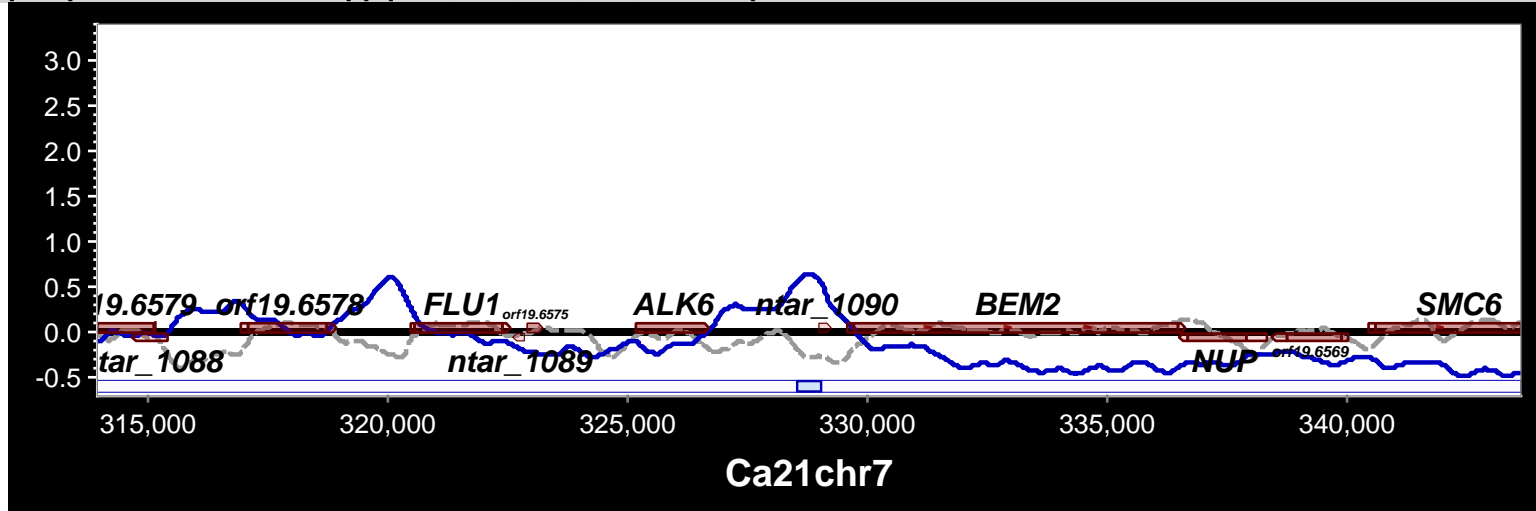

[0.621] Ca21chr1:2347922-2377605 [+] [TBP1, APN2, orf19.1835, orf19.1834, RPA190]

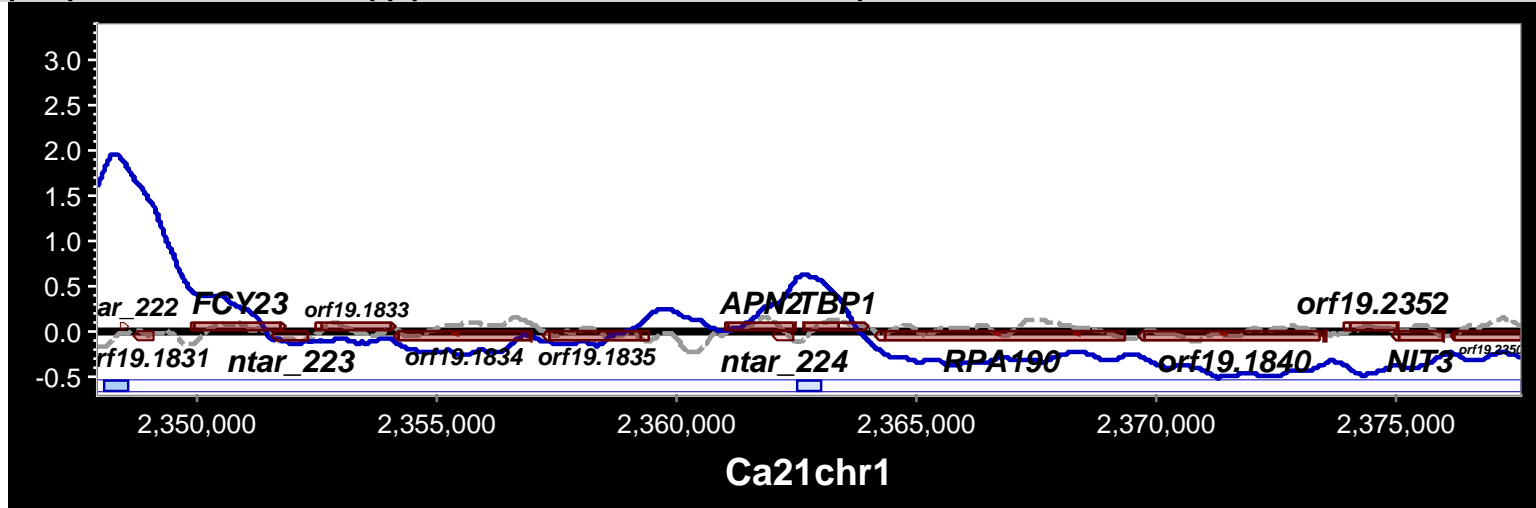

[0.62] Ca21chr5:118660-148343 [+] [PET9, orf19.931, orf19.929, orf19.928, orf19.927]

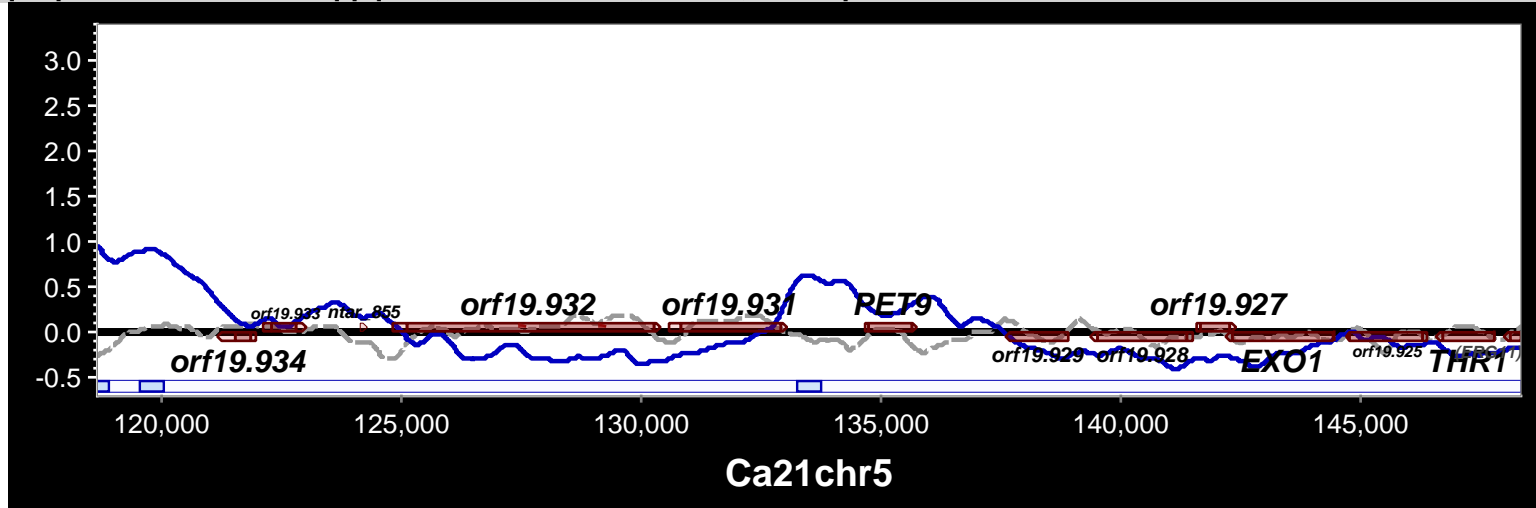

[0.59] Ca21chr1:2426731-2456414 [+] [orf19.2308, orf19.2309, orf19.2307, orf19.2306, RPL2]

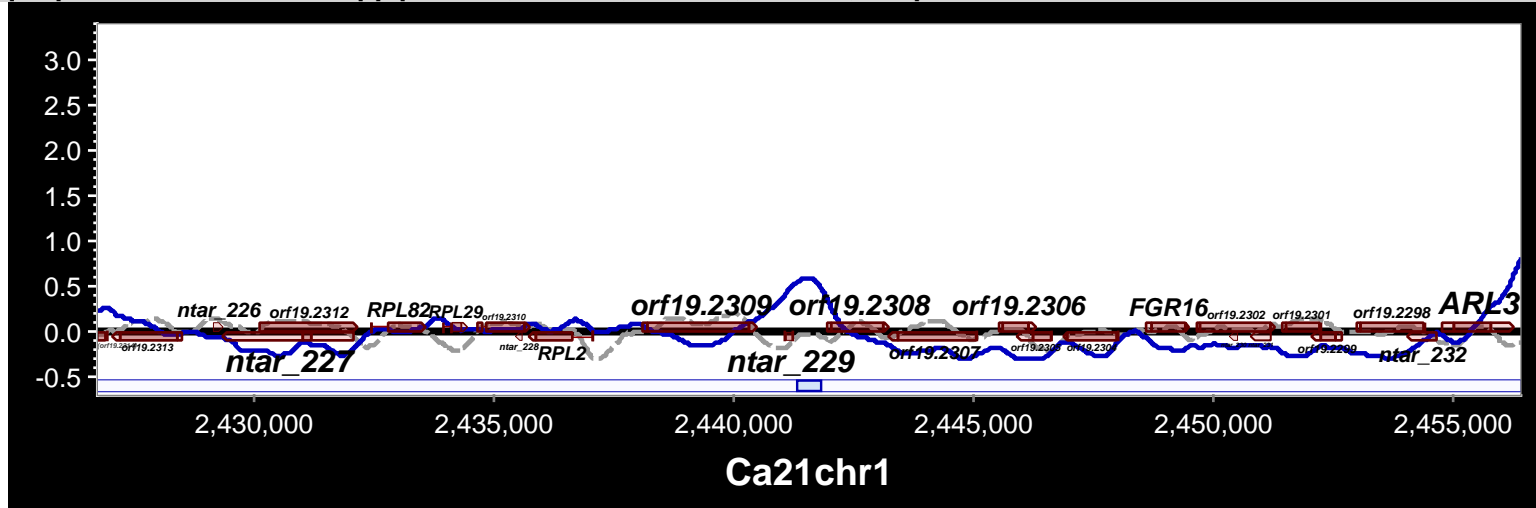

## **Chromatin immunoprecipitation (ChIP) mapping of genomic Rob1 binding sites**

Rob1 Myc-tagged strain CJN2208 vs. untagged wild-type strain SN250 immunoprecipitation binding data were performed under biofilm conditions. The X-axis represents ORF chromosomal locations. The Y-axis is the Agilent normalized enrichment value (log<sub>2</sub>) post-smoothing for the binding of Rob1. Rob1-Myc strain (red line) and untagged wild-type strain (grey dashed line) ChIP-chip array binding data was mapped and plotted onto the chromosomes containing the ORFs shown using MochiView v.1.45 software. All significant called peaks for Rob1 are indicated by the red track under the peak (see Supplemental Dataset 2 for exact locations and enrichment values). Peak-finding significance thresholds of  $P \leq 0.001$  were used followed by a user-defined cut-off for the minimum value for peak inclusion post-smoothing set to 0.40 (see MochiView manual for details). Genes plotted above the bold line read in the sense direction; genes plotted below the bold line read in the antisense direction.

[2.027] Ca21chrR:1298022-1327705 [+] [orf19.3868, orf19.3869, RPL7, ADE13, RFX1]

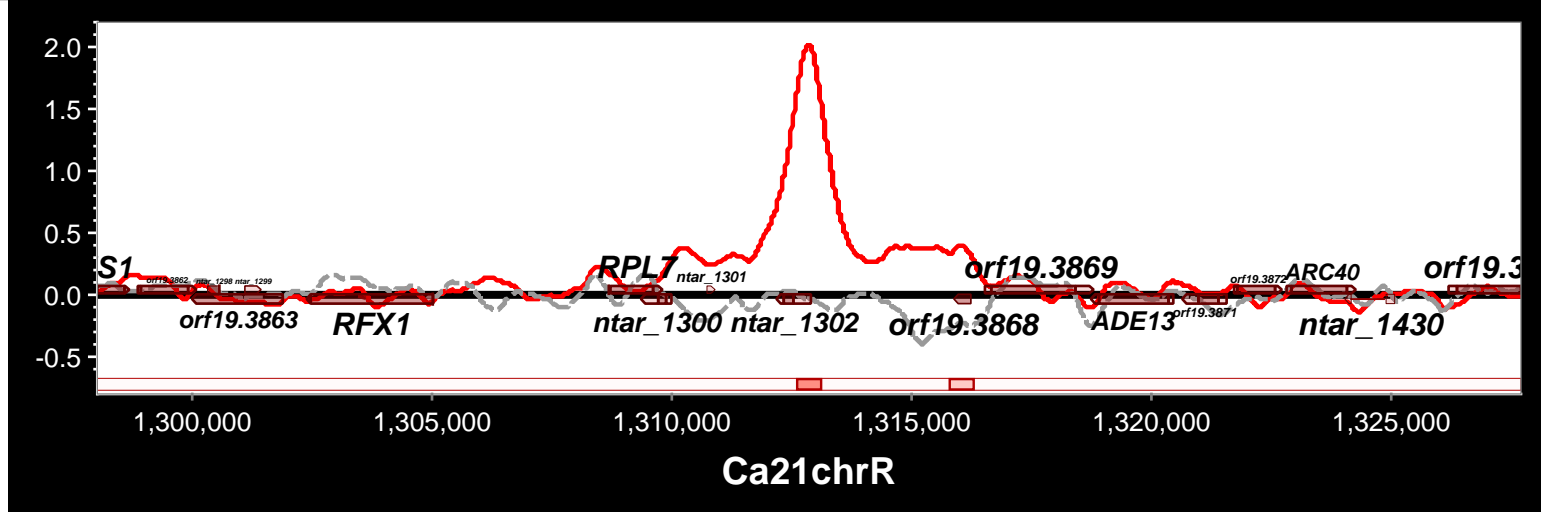

[1.795] Ca21chr2:1131932-1161615 [+] [tS(AGA)4, orf19.6874, orf19.6873.1, RPS8A, VPS35]

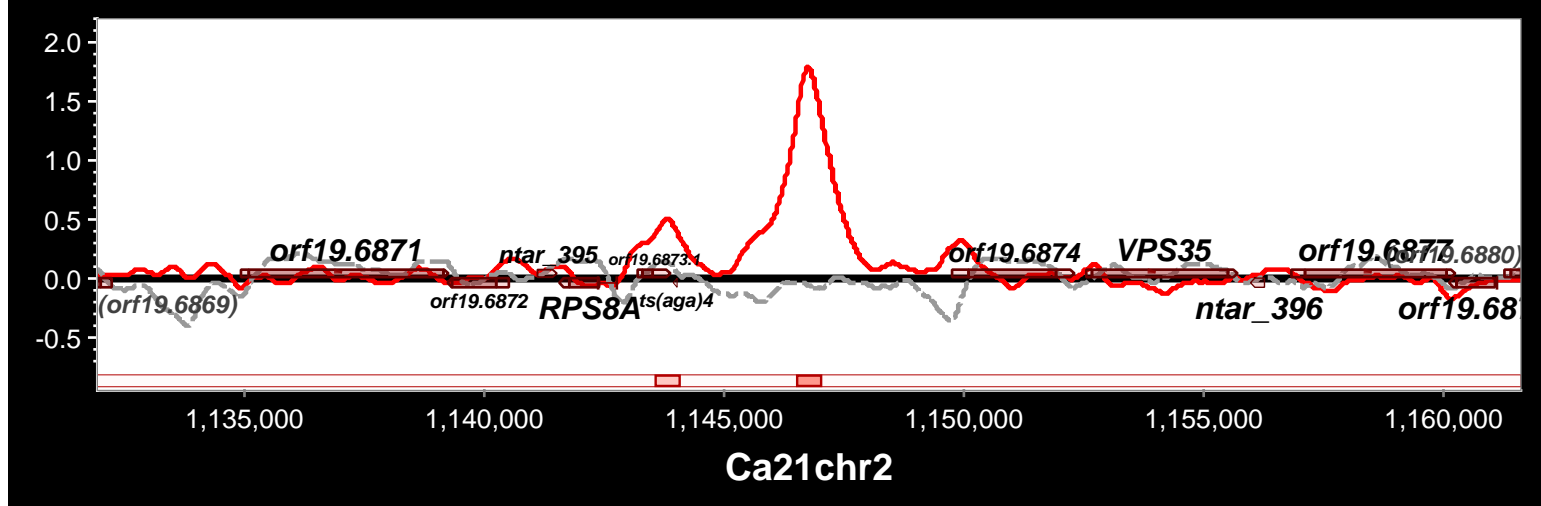

[1.394] Ca21chr1:2975940-3005623 [+] [KIS2, orf19.4998, orf19.4996, orf19.4995, CYB2]

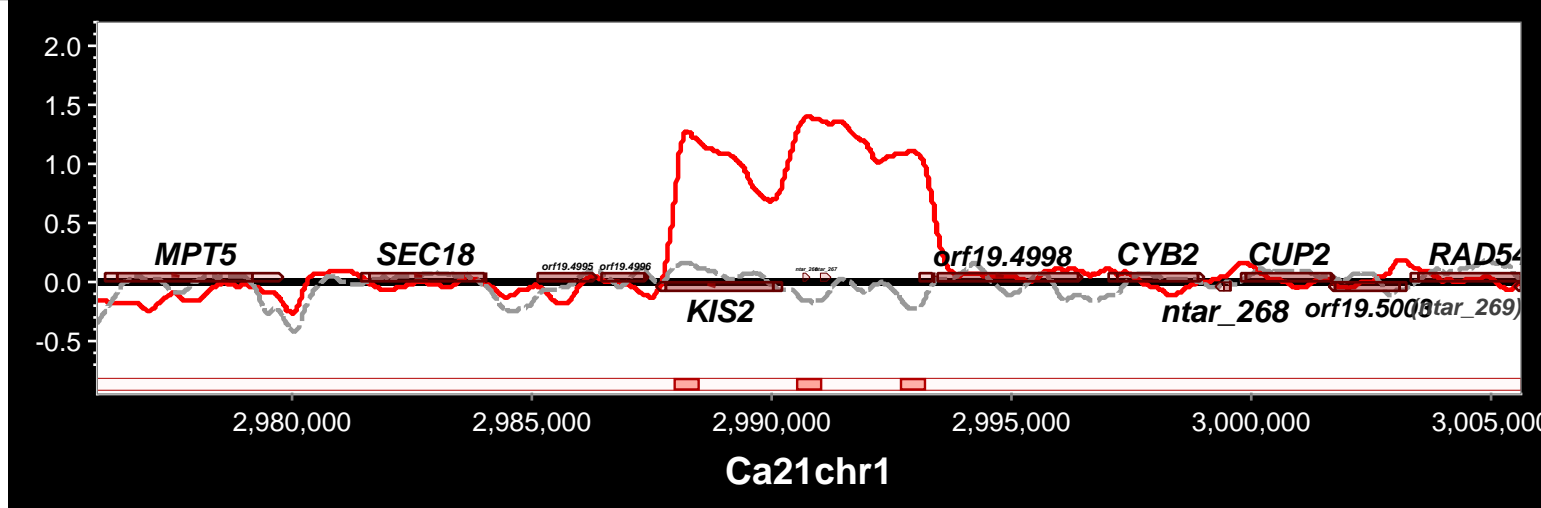

[1.352] Ca21chrR:1704694-1734377 [+] [EFG1, tG(GCC)1, orf19.609, orf19.612, orf19.607]

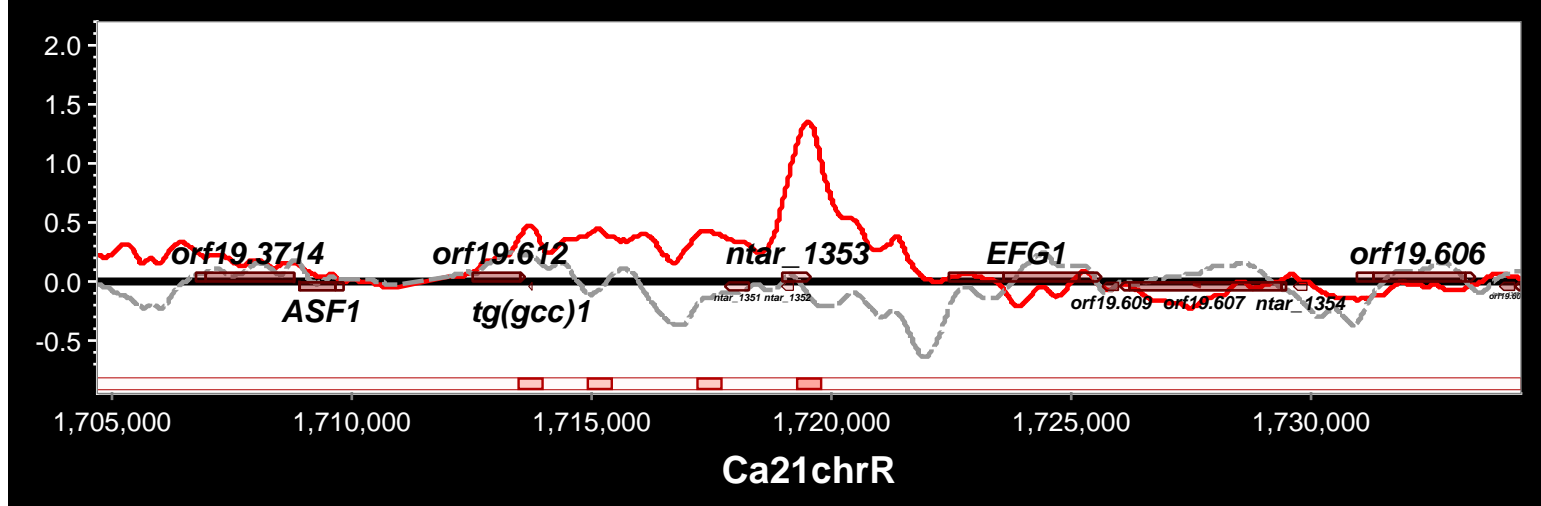

[1.338] Ca21chr3:937686-967369 [+] [TEC1, ADE2, orf19.5910, CMK1, orf19.5905]

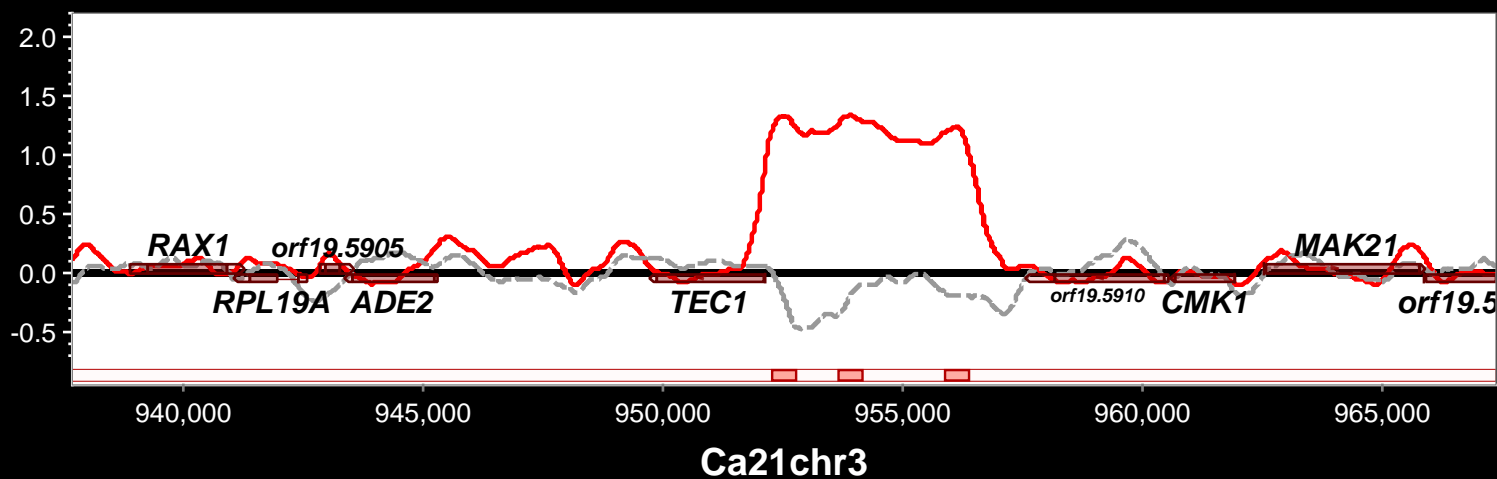

[1.331] Ca21chrR:1875439-1905122 [+] [RDN5, RDN18, RDN58, RDN25, TAR1]

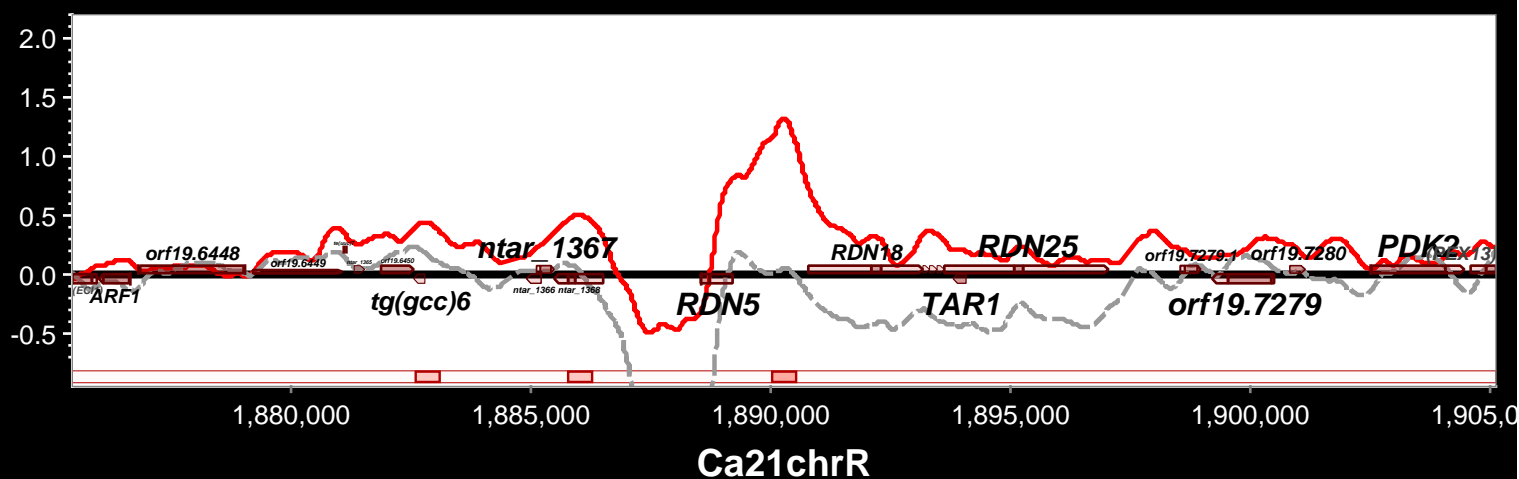

[1.327] Ca21chr3:939070-968753 [+] [TEC1, orf19.5910, CMK1, MAK21, ADE2]

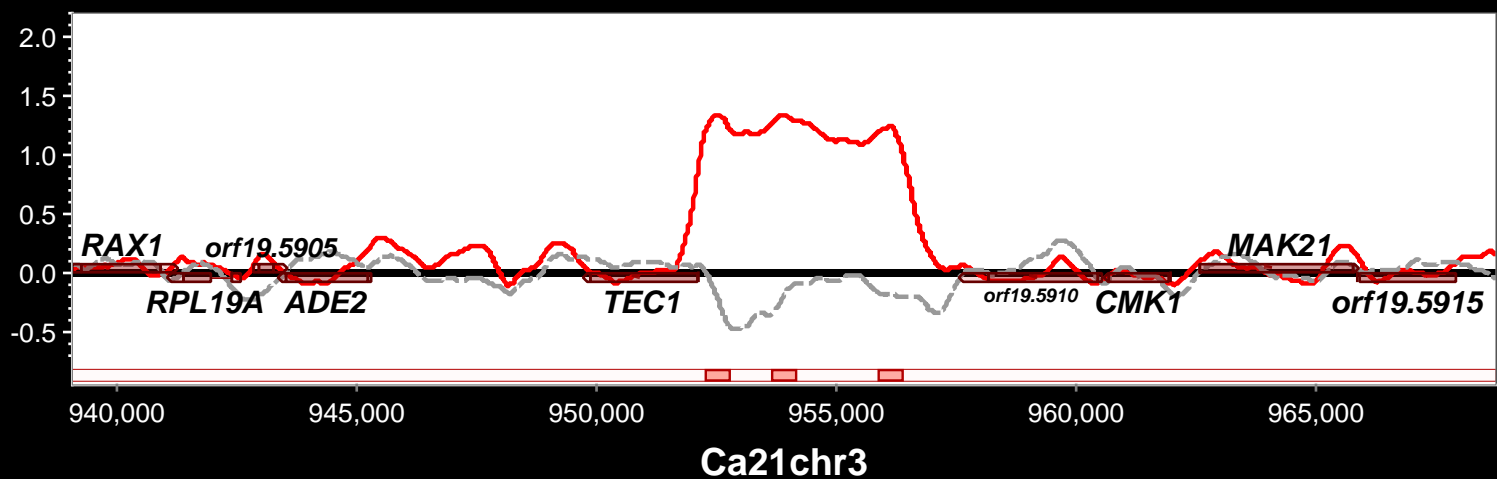

[1.288] Ca21chr1:2973386-3003069 [+] [orf19.4996, KIS2, orf19.4995, orf19.4998, SEC18]

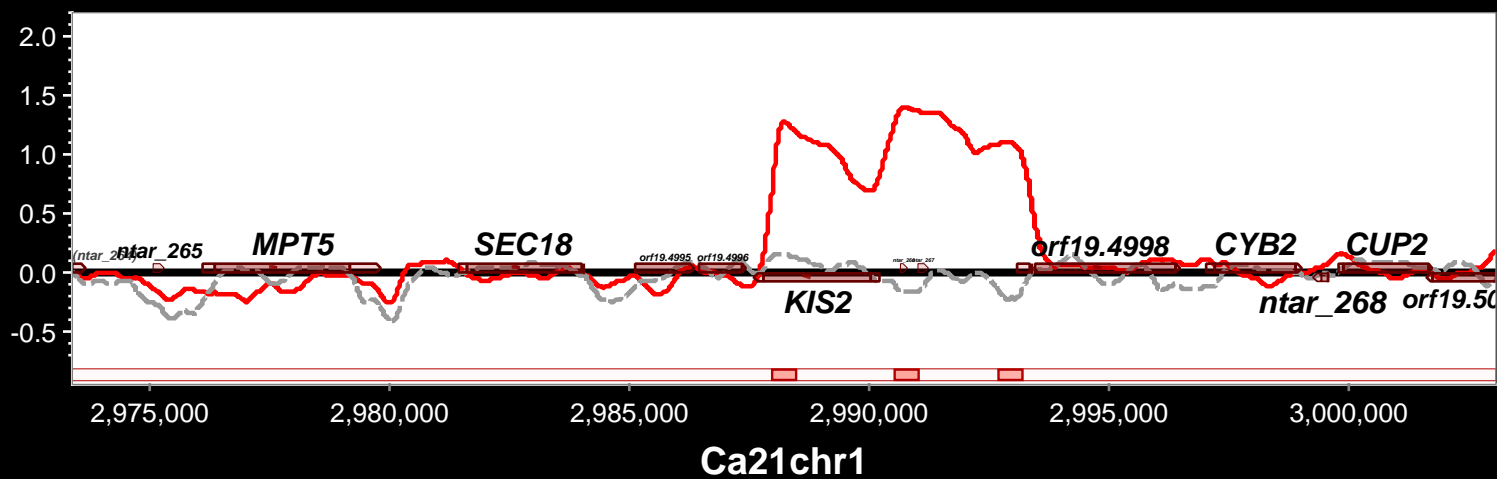

[1.274] Ca21chr3:1109454-1139137 [+] [RHB1, MCA1, WOR2, RPS19A, DYN1]

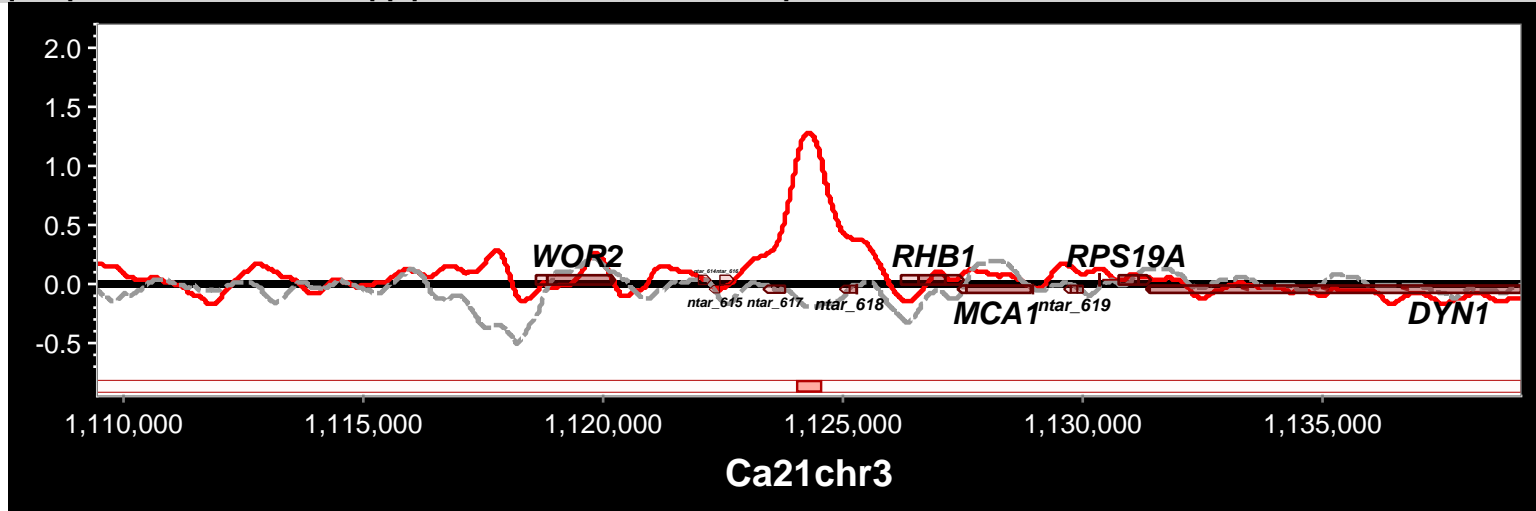

[1.239] Ca21chr3:941291-970974 [+] [TEC1, orf19.5910, CMK1, MAK21, ADE2]

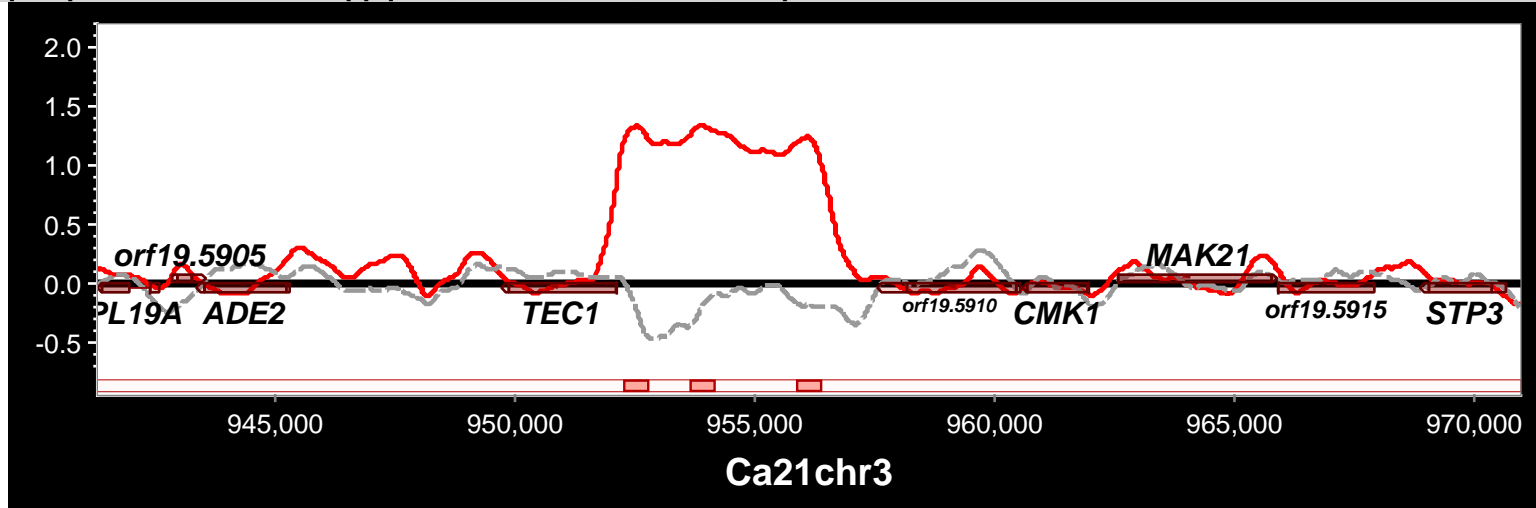

[1.207] Ca21chr1:1067734-1097417 [+] [GAT2, orf19.450, orf19.4057, orf19.449, orf19.4059]

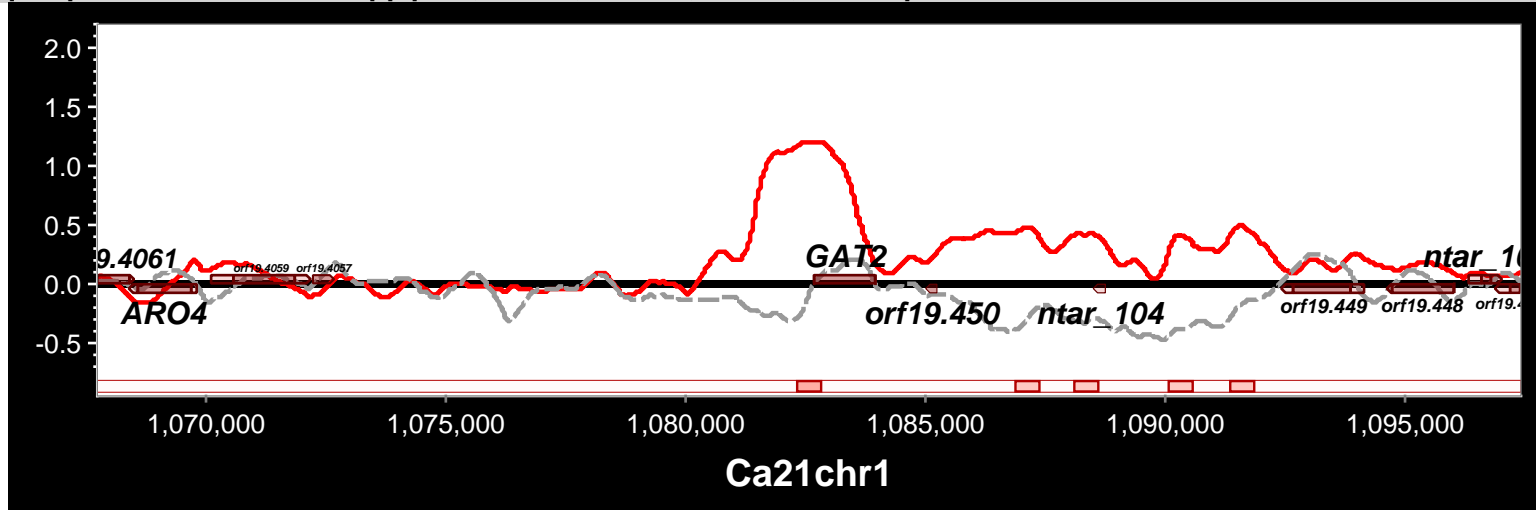

[1.178] Ca21chrR:1356482-1386165 [+] [BCR1, orf19.725, orf19.721, PPZ1, GST3]

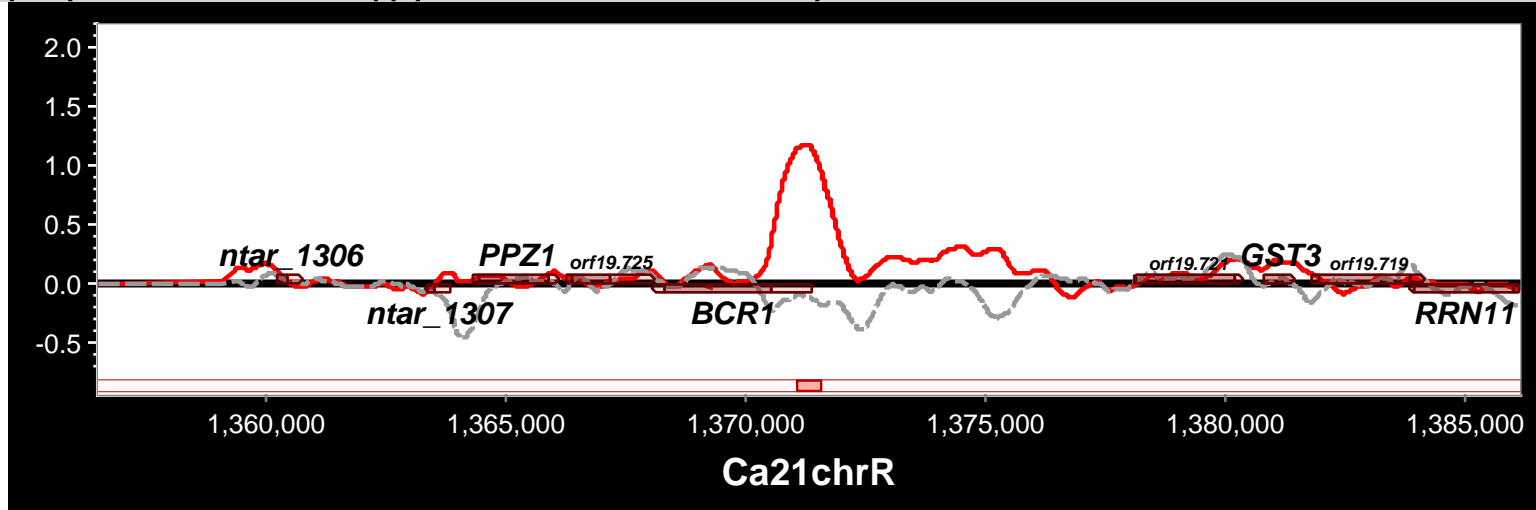

[1.107] Ca21chr1:2978105-3007788 [+] [orf19.4998, KIS2, CYB2, orf19.4996, CUP2]

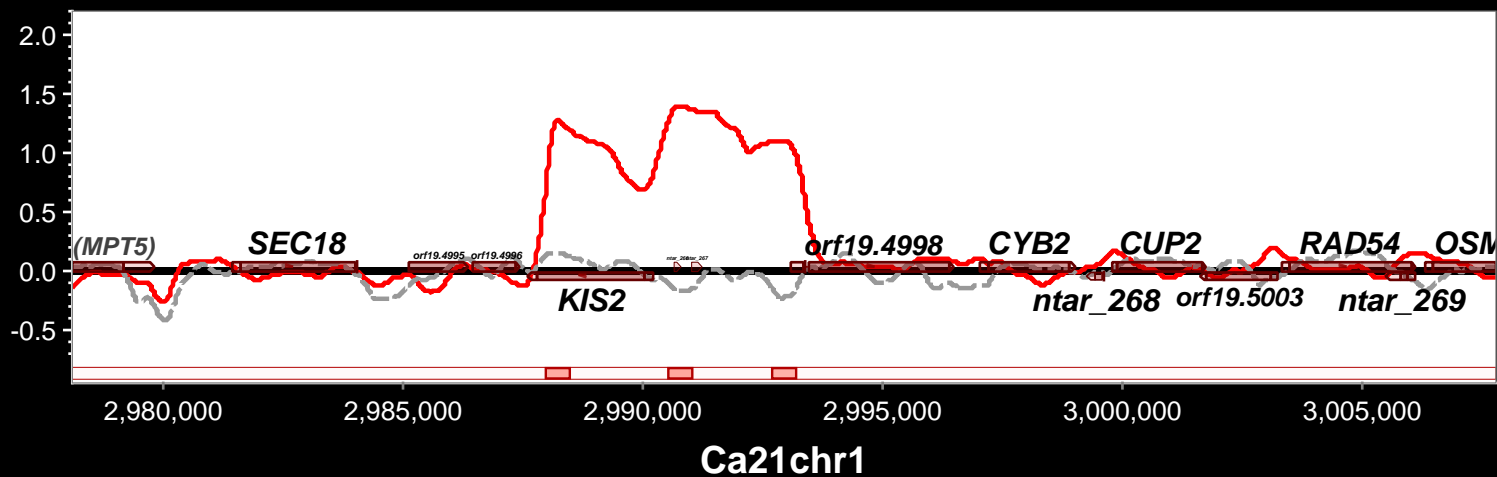

[0.912] Ca21chr2:1727999-1757682 [+] [orf19.3621, YWP1, ANP1, orf19.3617, ERG9]

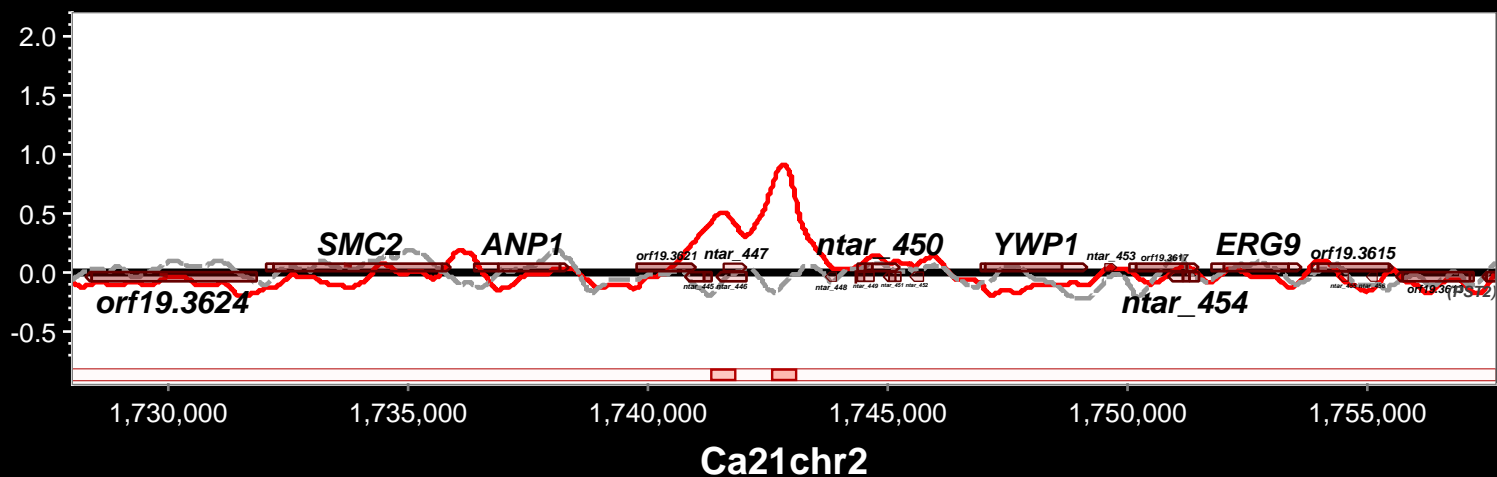

[0.843] Ca21chr3:80710-110393 [+] [IFF11, orf19.5397, orf19.5394.1, orf19.5395, orf19.5402]

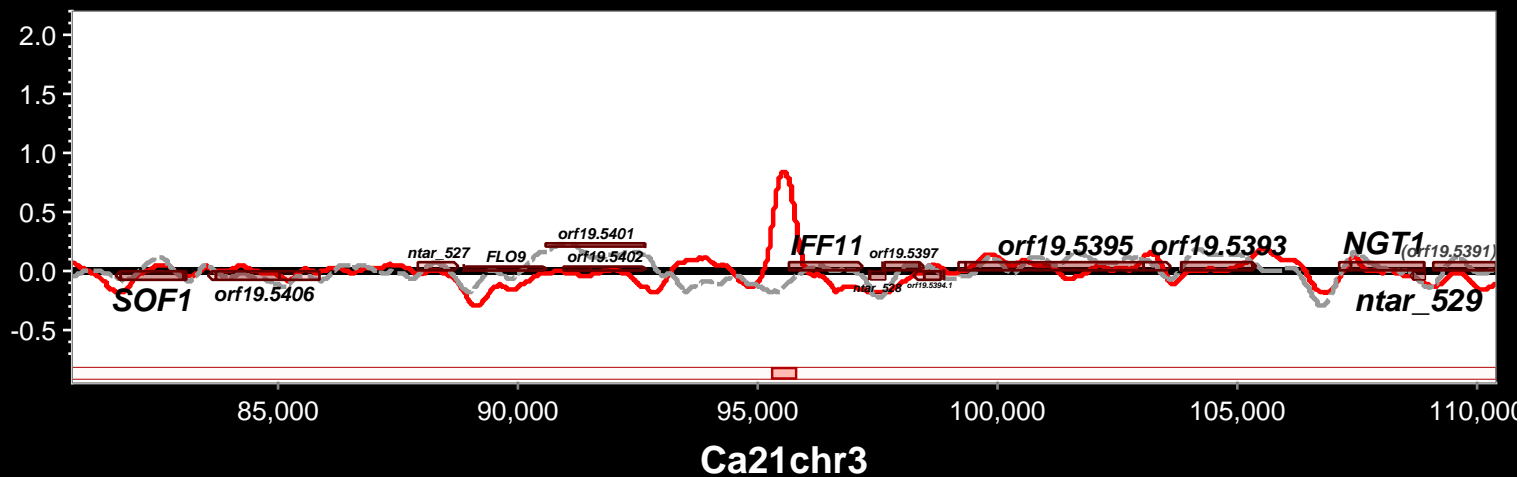

[0.827] Ca21chr7:897824-927507 [+] [orf19.7151, orf19.7152, orf19.7153, NRG1, UTP18]

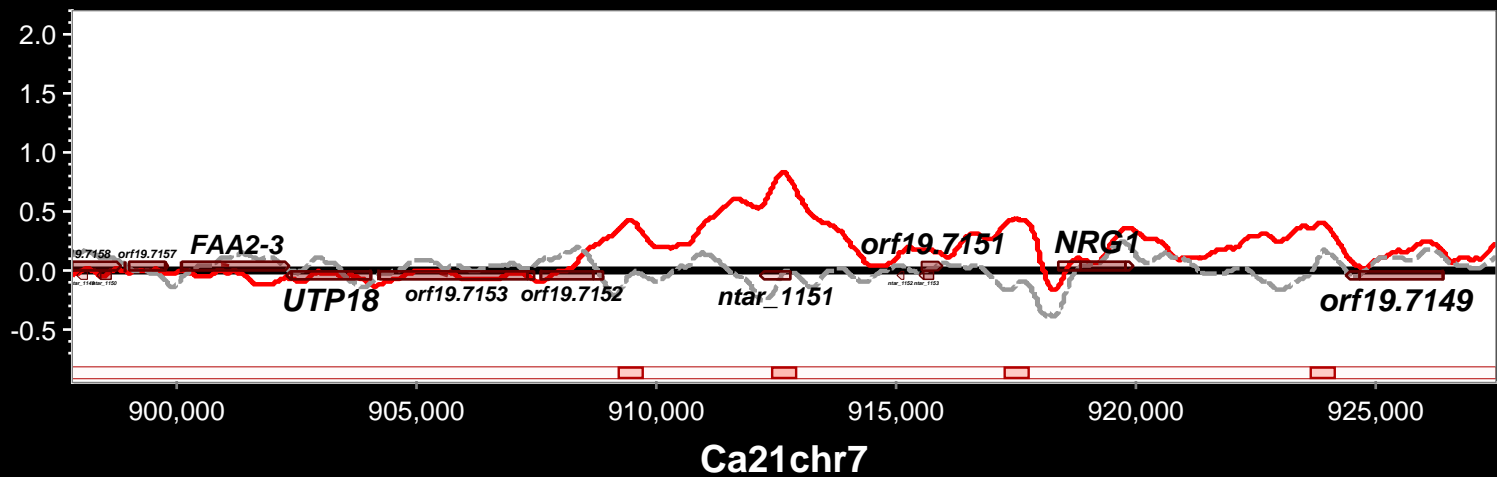



[0.758] Ca21chr1:284338-314021 [+] [orf19.3337, orf19.3338, SOD2, orf19.3335, RPS21]

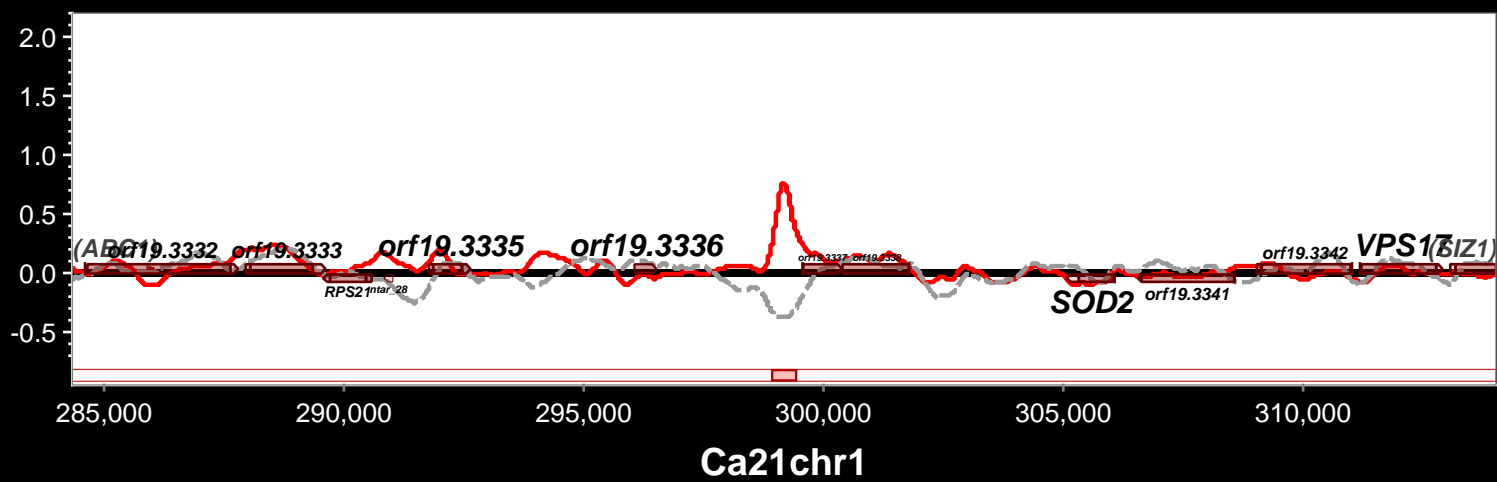

[0.665] Ca21chr4:200317-230000 [+] [HGT17, RAT1, MLP1, RPL40B, orf19.4685]

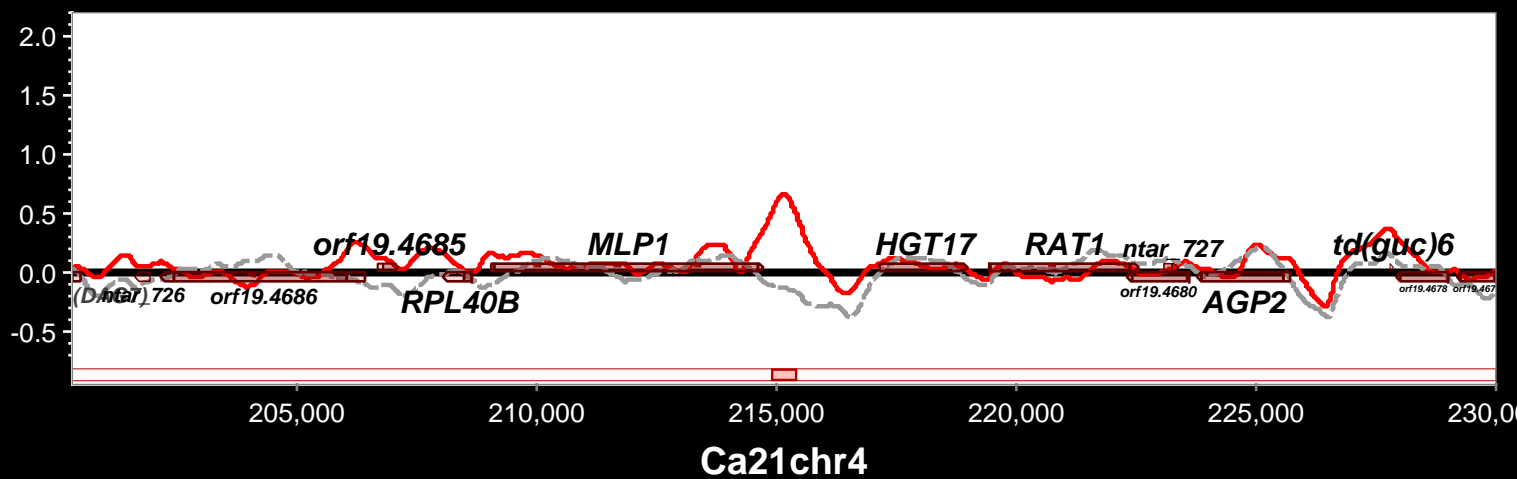

[0.635] Ca21chr1:2837007-2866690 [+] [orf19.4936, OP4, orf19.4936.1, FAD3, CHS3]

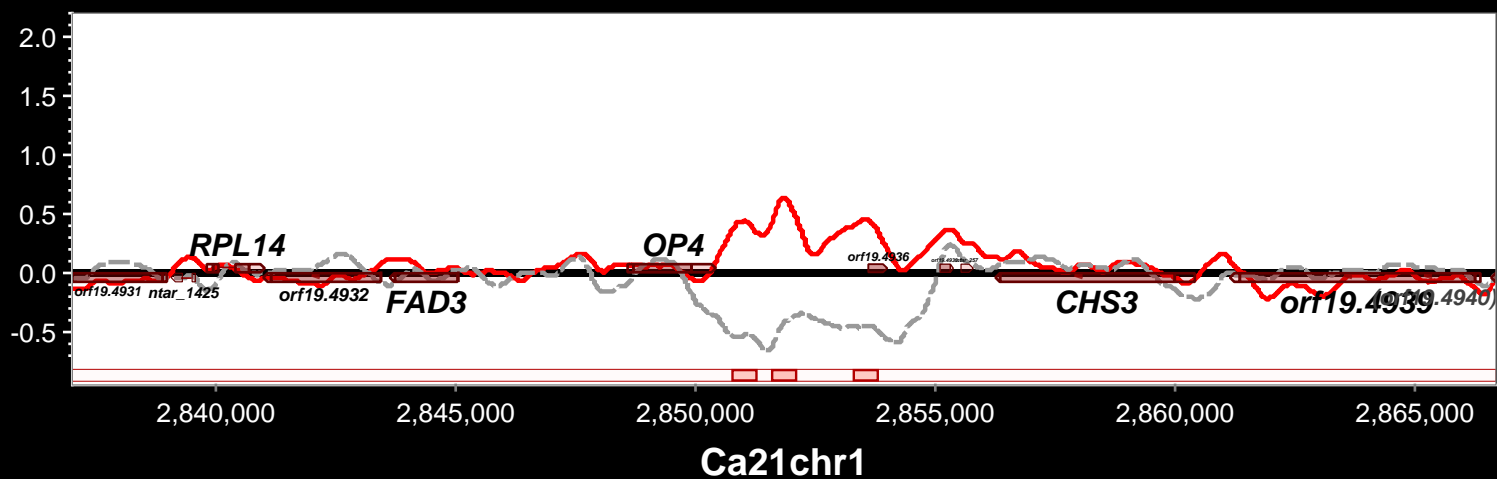

[0.616] Ca21chr2:509414-539097 [+] [ZRT2, FGR22, orf19.1584, HGT20, orf19.1588]

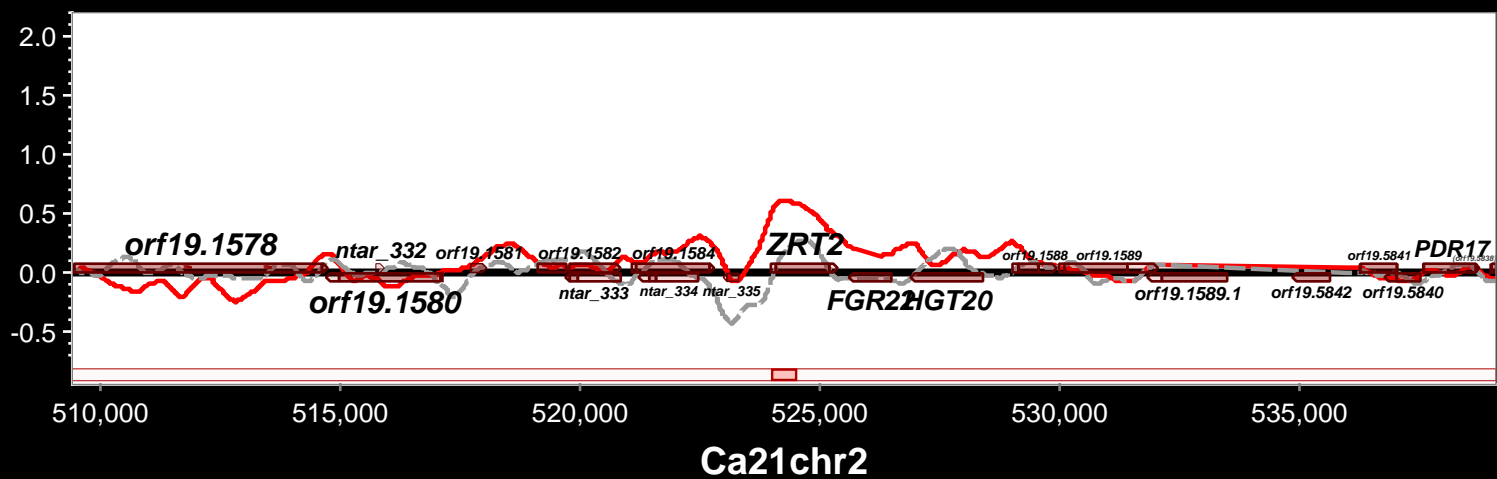

[0.608] Ca21chr5:839419-869102 [+] [orf19.1105.3, PGA56, orf19.1106, orf19.1105, orf19.3220]

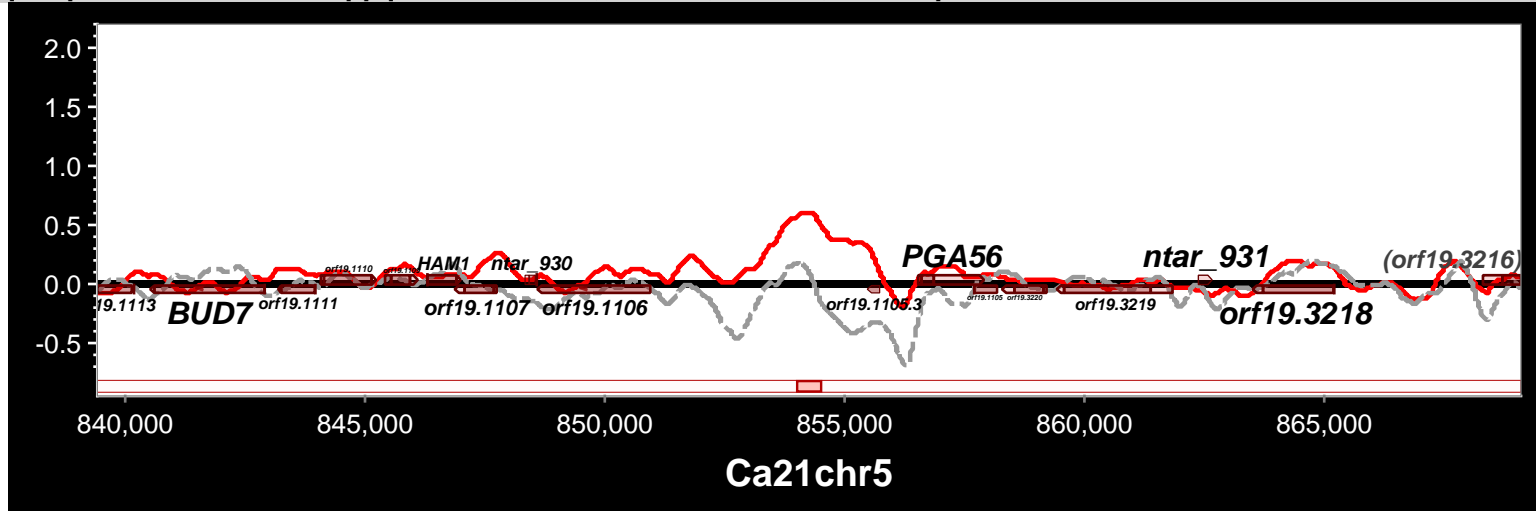

[0.601] Ca21chr3:1713660-1743343 [+] [TCC1, orf19.6732, orf19.6731.1, orf19.6731, orf19.6730]

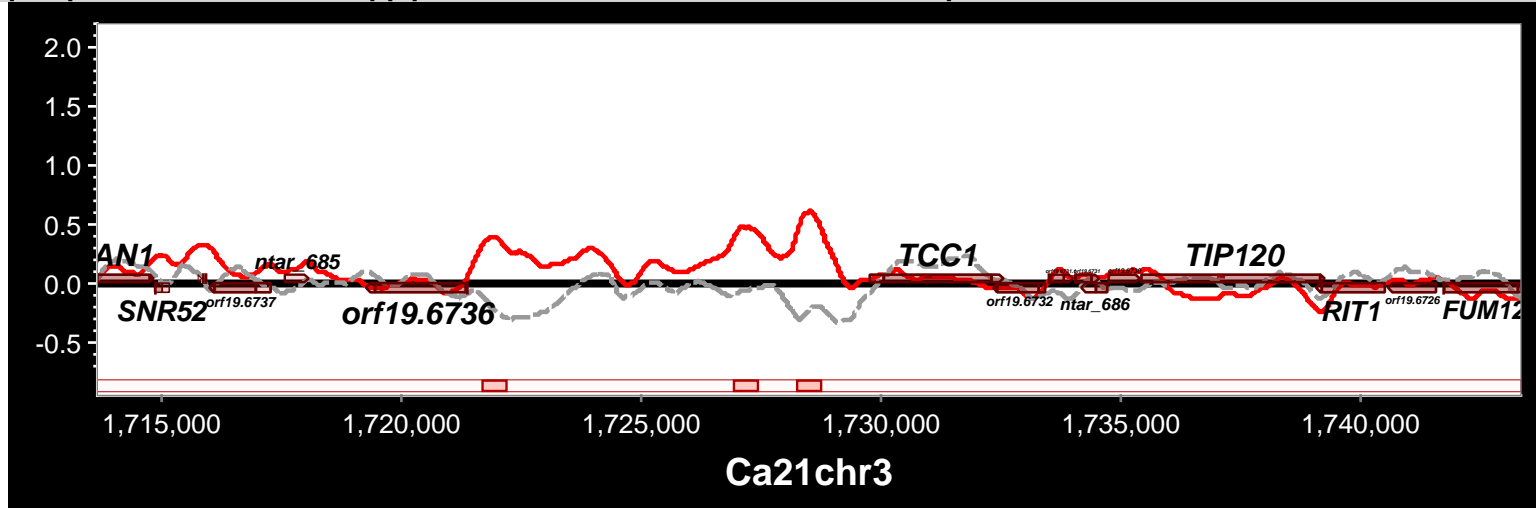

[0.597] Ca21chrR:2096389-2126072 [+] [BET2, DEF1, DPB2, GNP3, YTA6]

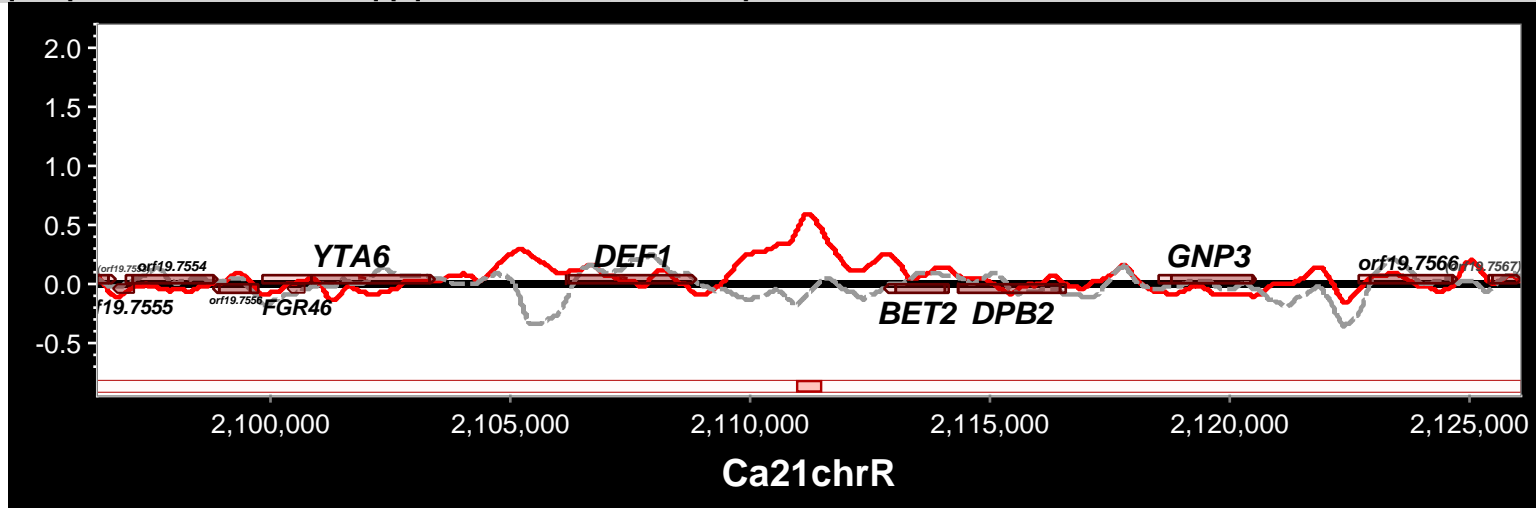

[0.58] Ca21chr3:1769725-1799408 [+] [orf19.6189, orf19.6188, SRB1, orf19.6186, orf19.6185]

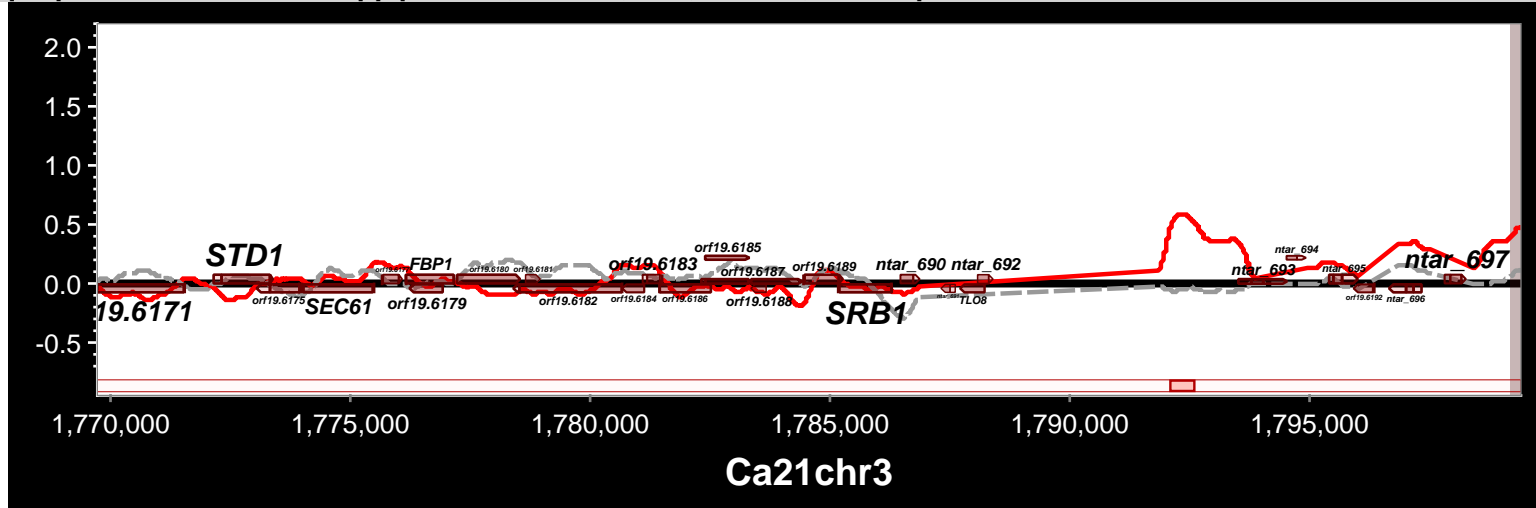

[0.575] Ca21chr4:551619-581302 [+] [orf19.2725, orf19.2724, orf19.2726, GRX3, orf19.2728]

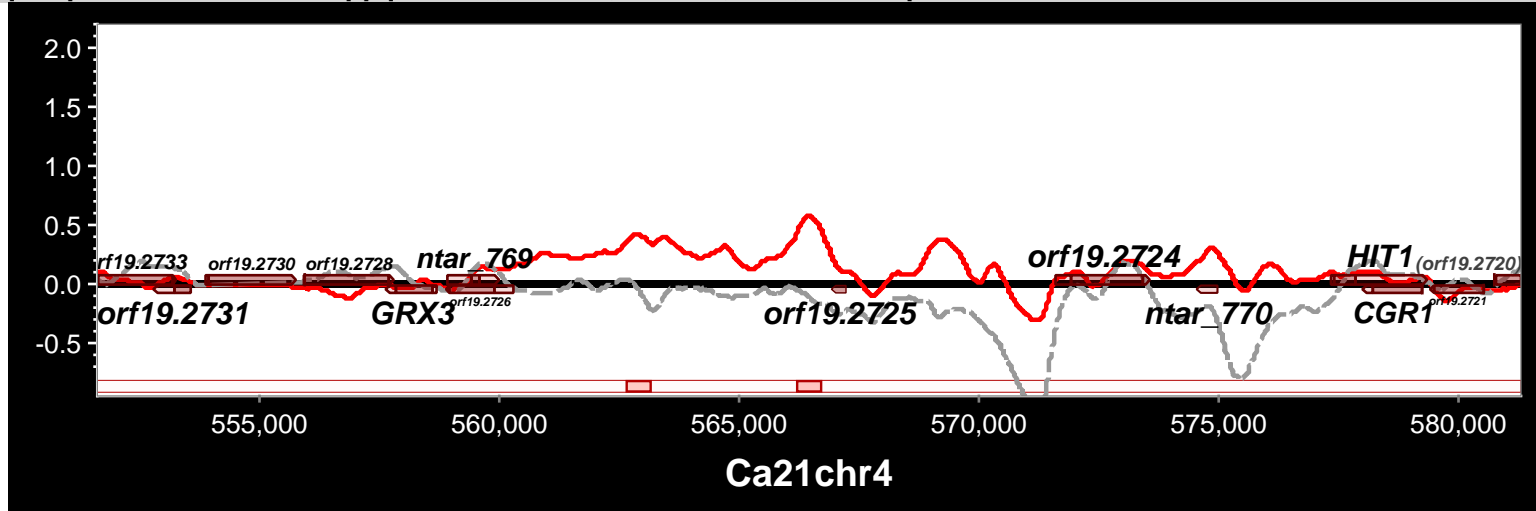

[0.574] Ca21chr5:83901-113584 [+] [NAM7, orf19.938, BUD2, orf19.936, SEC14]

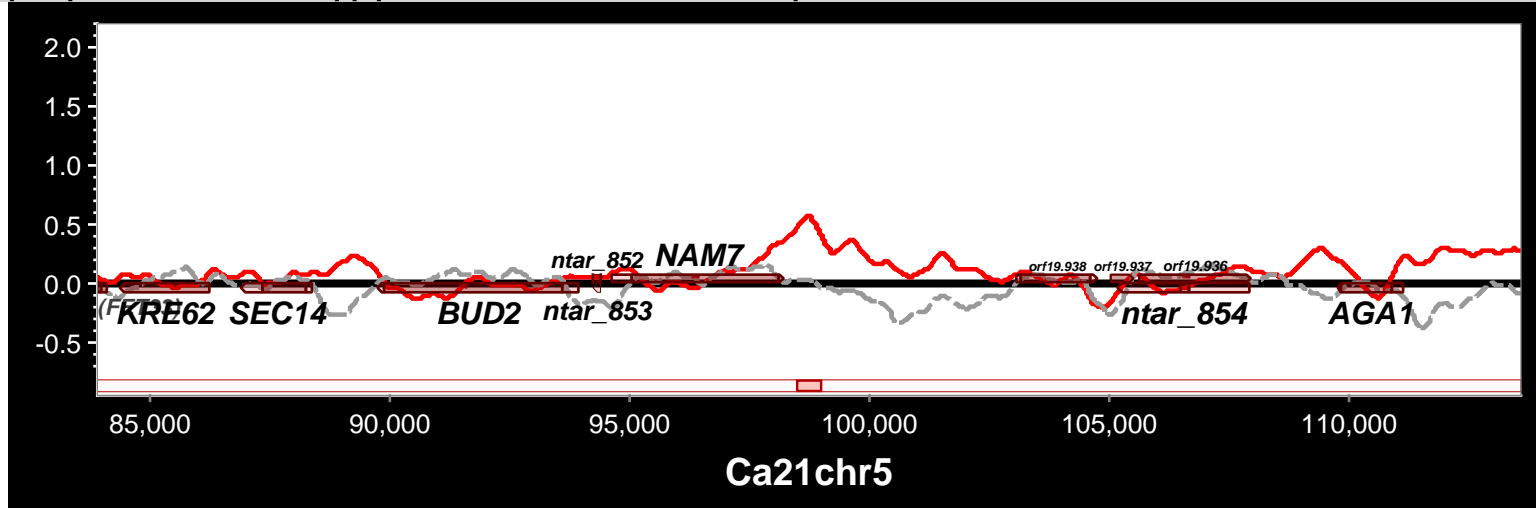

[0.557] Ca21chr2:1-29684 [+] [orf19.1910, PGA52, orf19.1913, FAV3, EMC9]

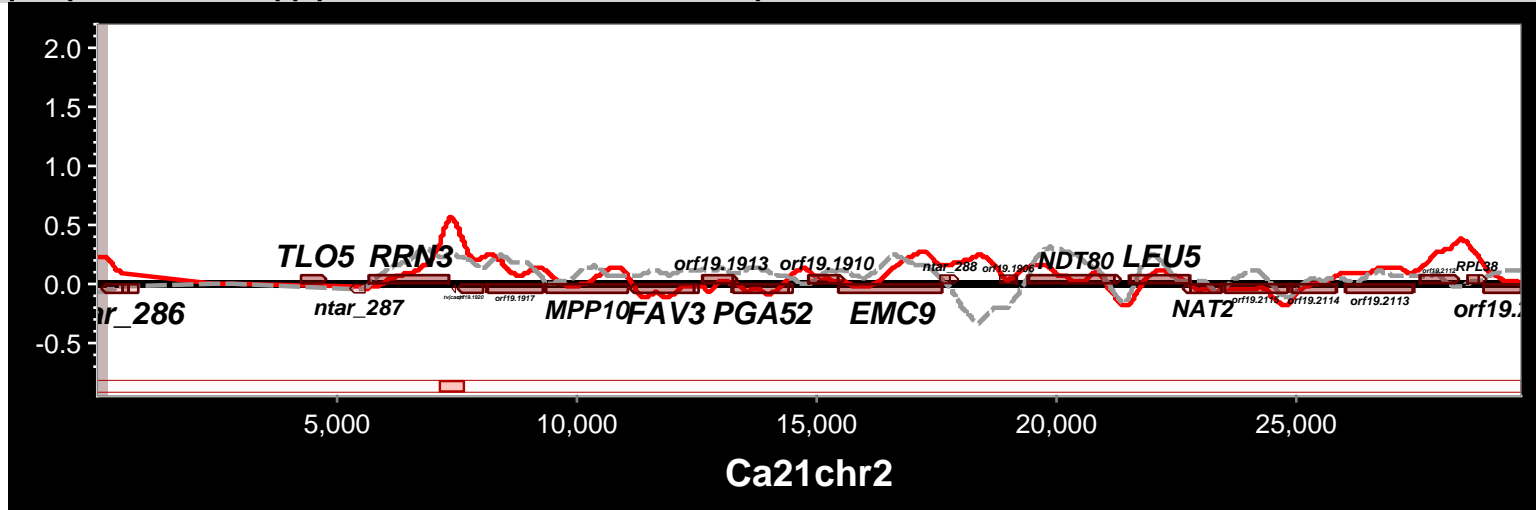

[0.547] Ca21chr1:1294450-1324133 [+] [PGA50, orf19.1823, orf19.1825, MDM34, UME6]

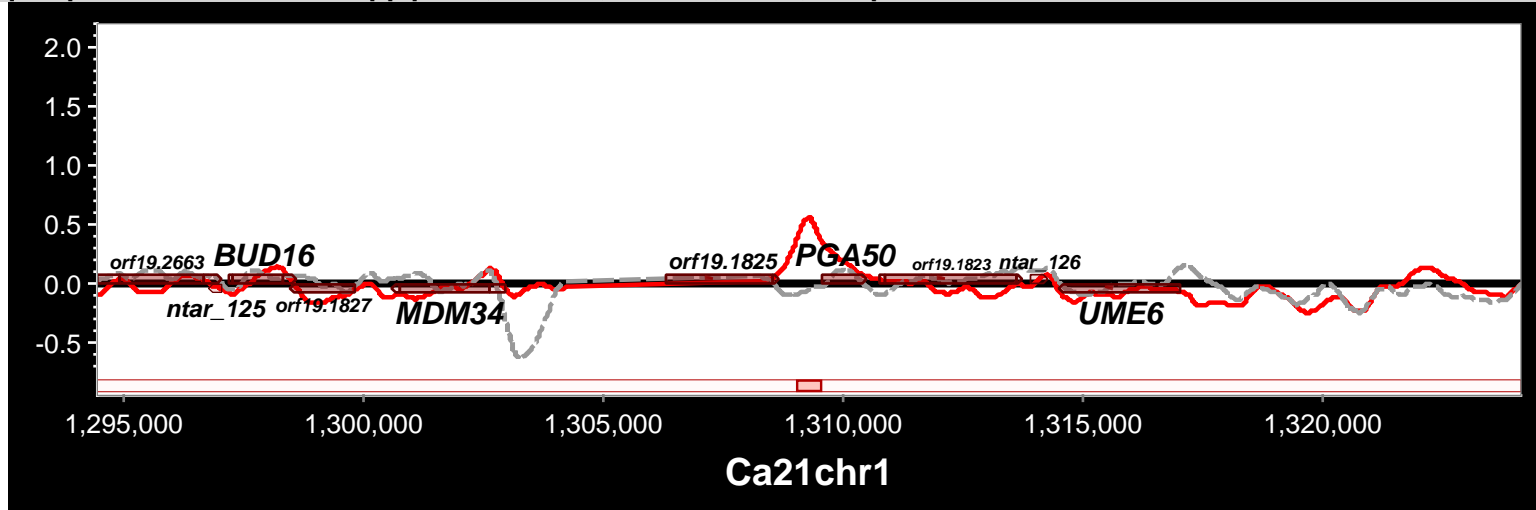

[0.544] Ca21chr7:431542-461225 [+] [CUP9, HSP90, RAD14, orf19.6518, EXO70]

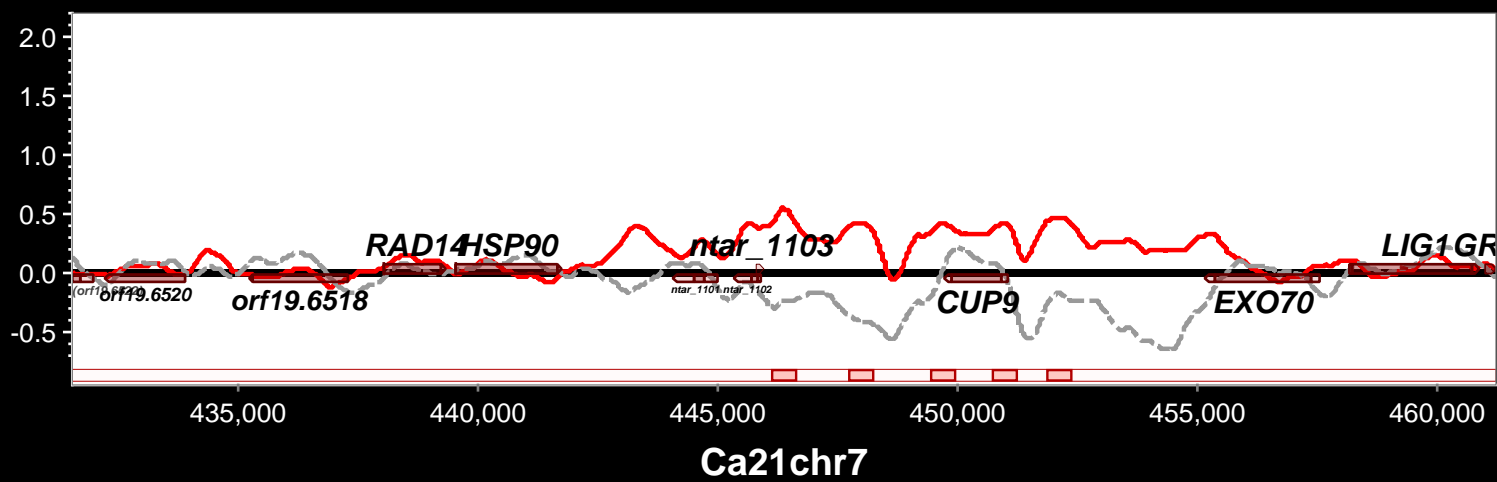

[0.527] Ca21chr1:430463-460146 [+] [SHA3, GAL1, orf19.3671, GAL10, orf19.3673]

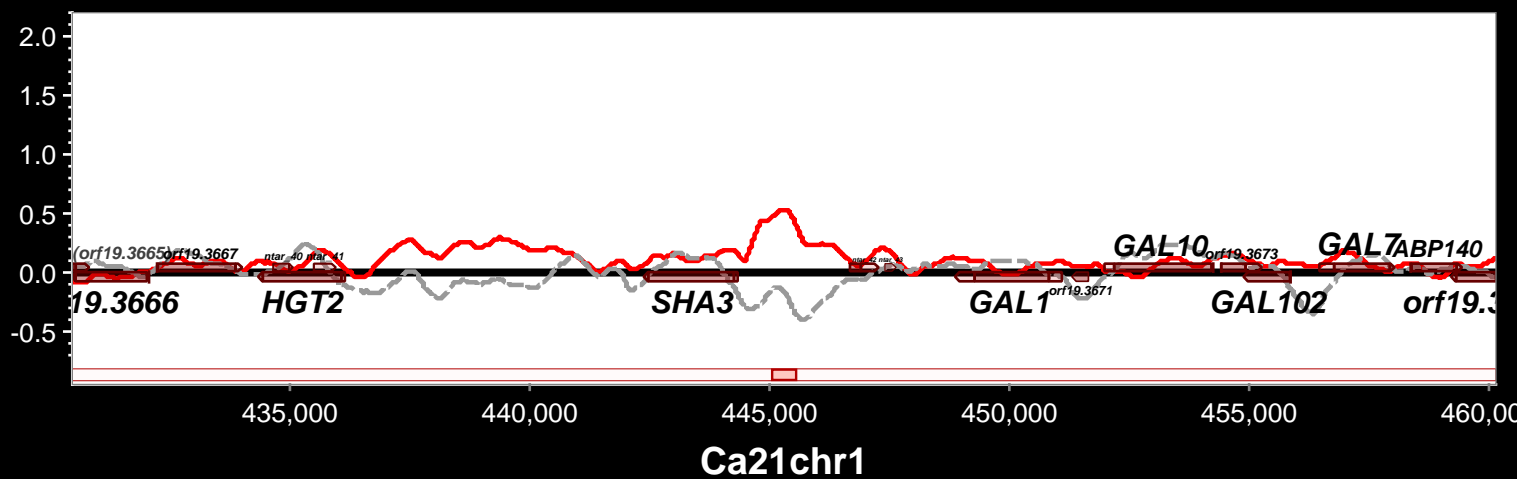

[0.523] Ca21chr1:521963-551646 [+] [tR(UCU)4, orf19.2943.5, PUT4, DIP5, HNM4]

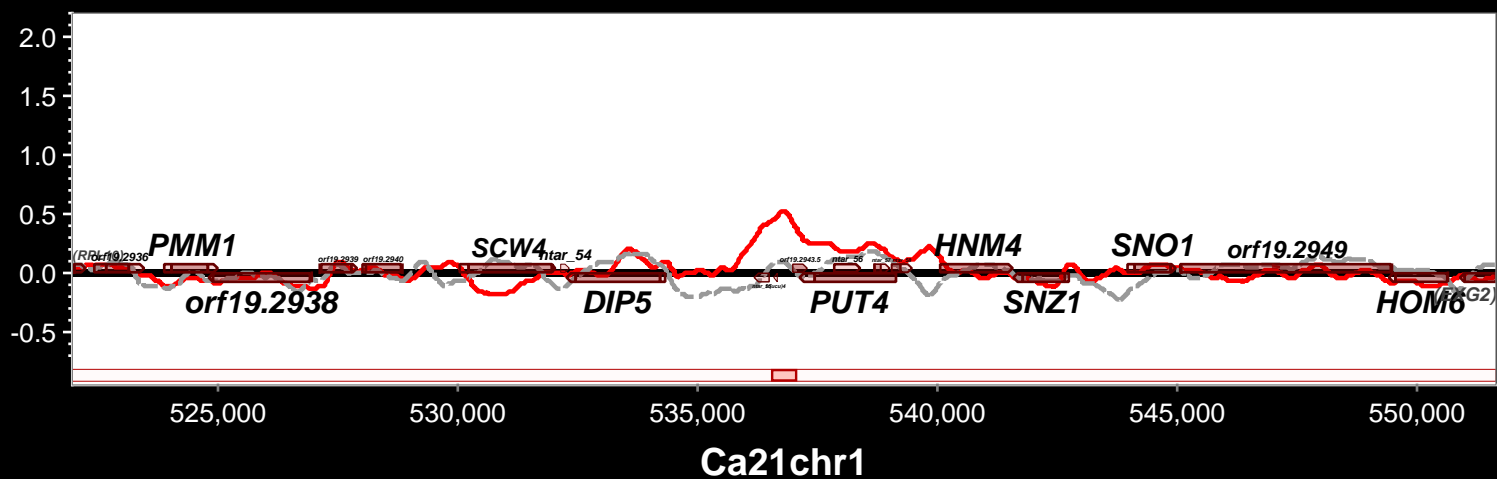

[0.52] Ca21chr2:186467-216150 [+] [HNM1, REG1, orf19.2002, orf19.2006, orf19.2001]

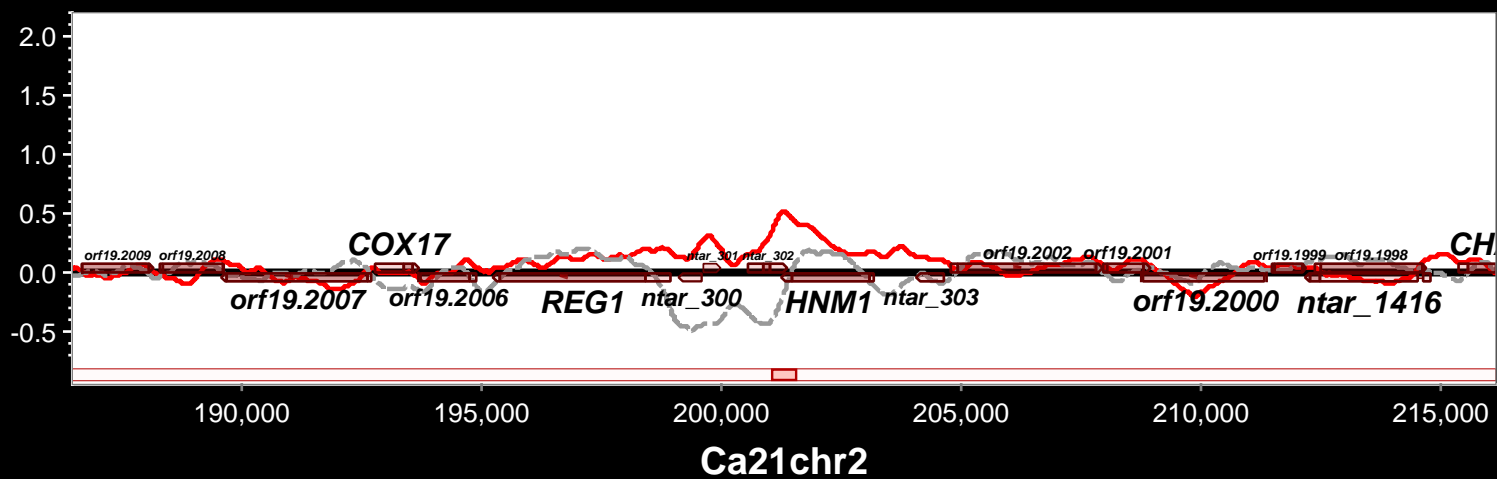

[0.505] Ca21chr2:1128982-1158665 [+] [ts(AGA)4, orf19.6873.1, RPS8A, orf19.6872, orf19.6874]

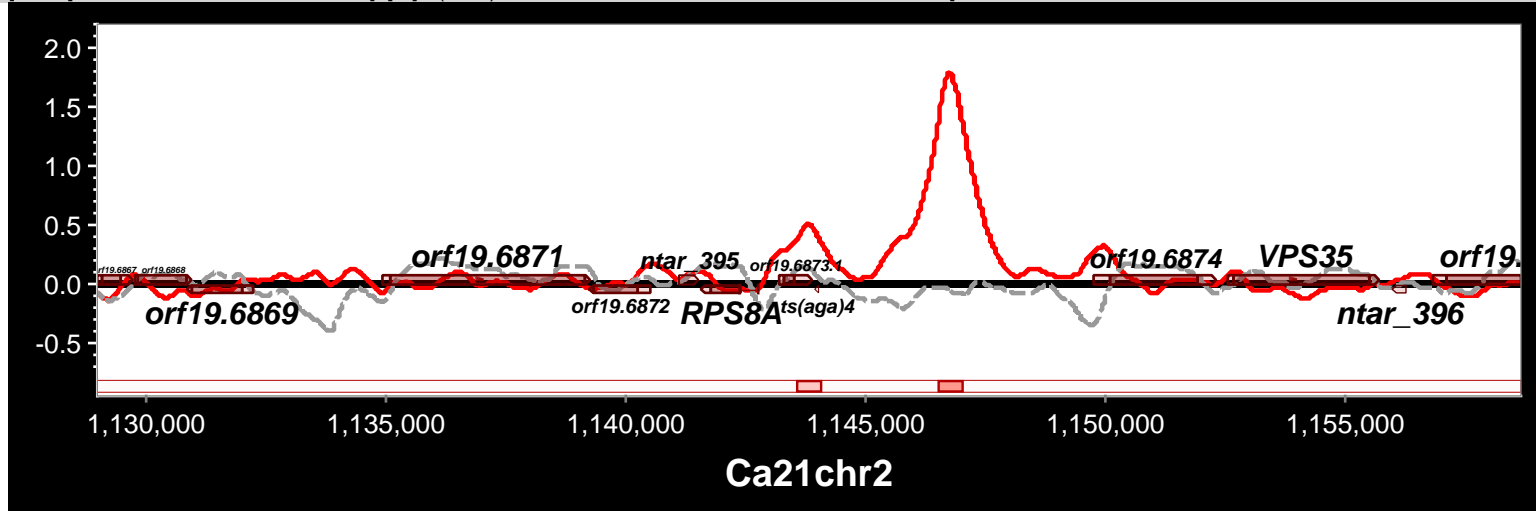

[0.504] Ca21chr1:459779-489462 [+] [CWH8, orf19.3683, orf19.3684, orf19.3681, PSY2]

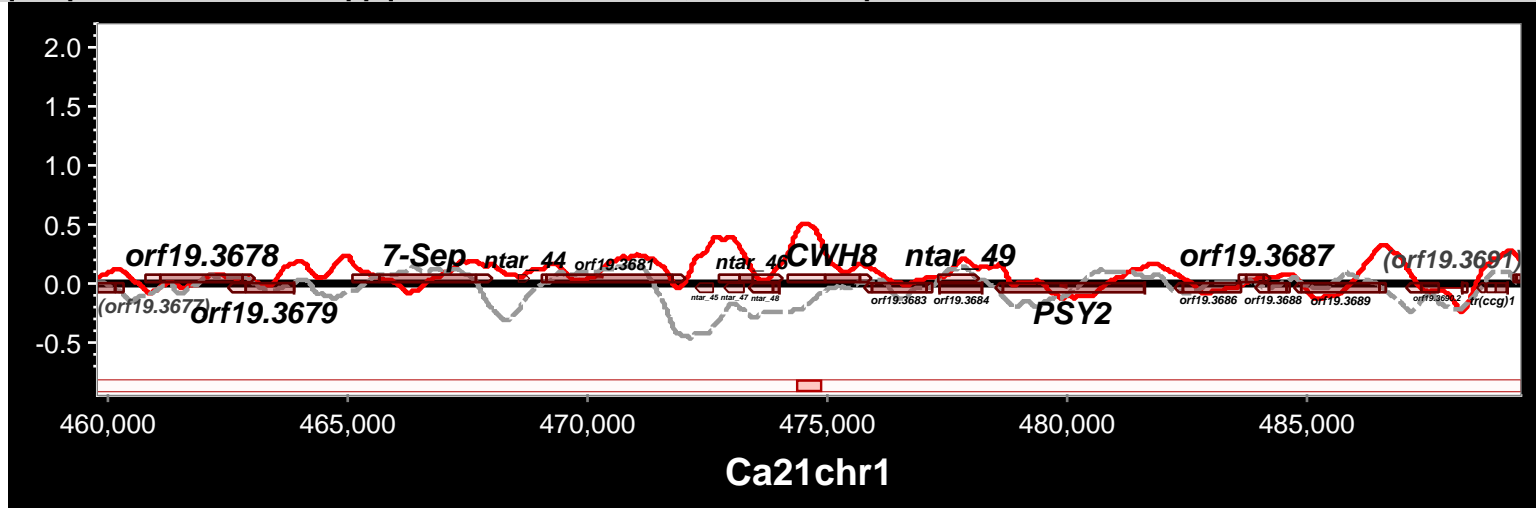

[0.504] Ca21chr2:1726730-1756413 [+] [orf19.3621, ANP1, YWP1, orf19.3617, SMC2]

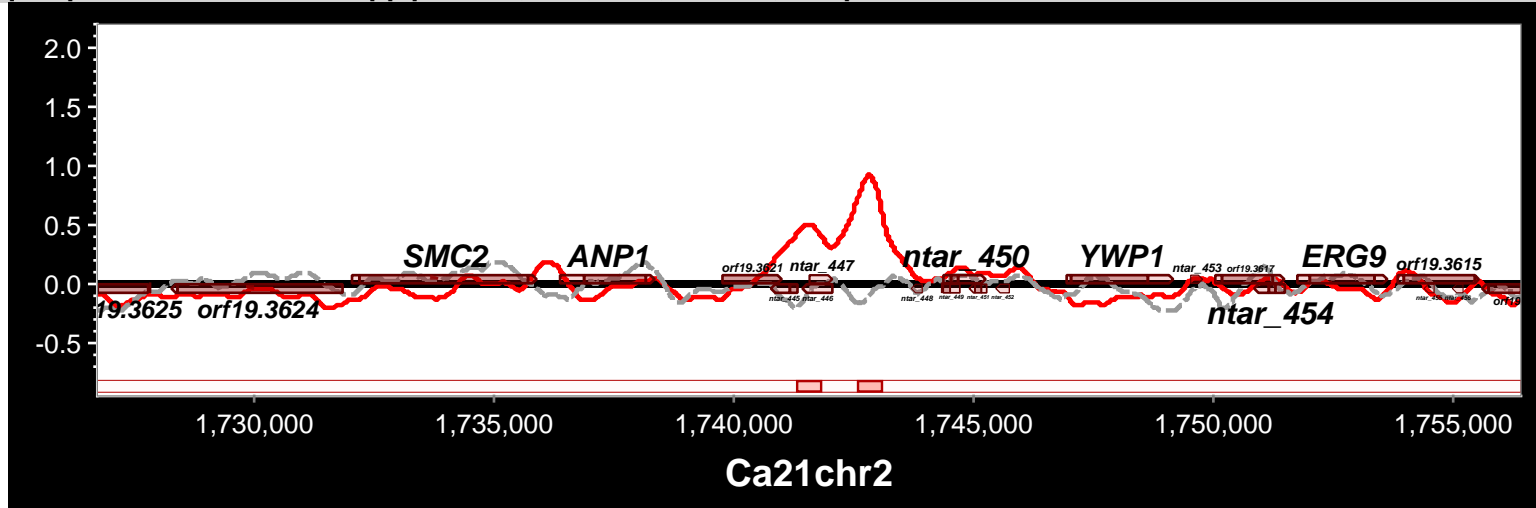

[0.501] Ca21chrR:1871185-1900868 [+] [RDN5, tG(GCC)6, tE(UUC)7, RDN18, orf19.6449]

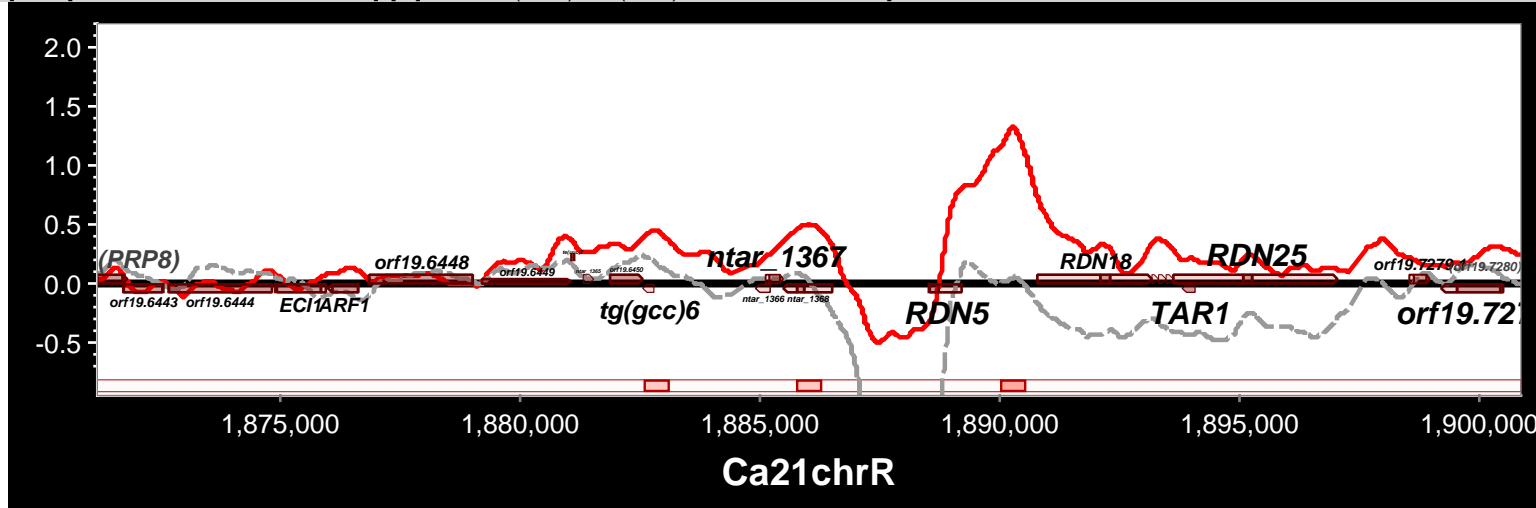

[0.495] Ca21chr1:1076764-1106447 [+] [orf19.449, orf19.448, orf19.446.2, orf19.450, orf19.446.1]

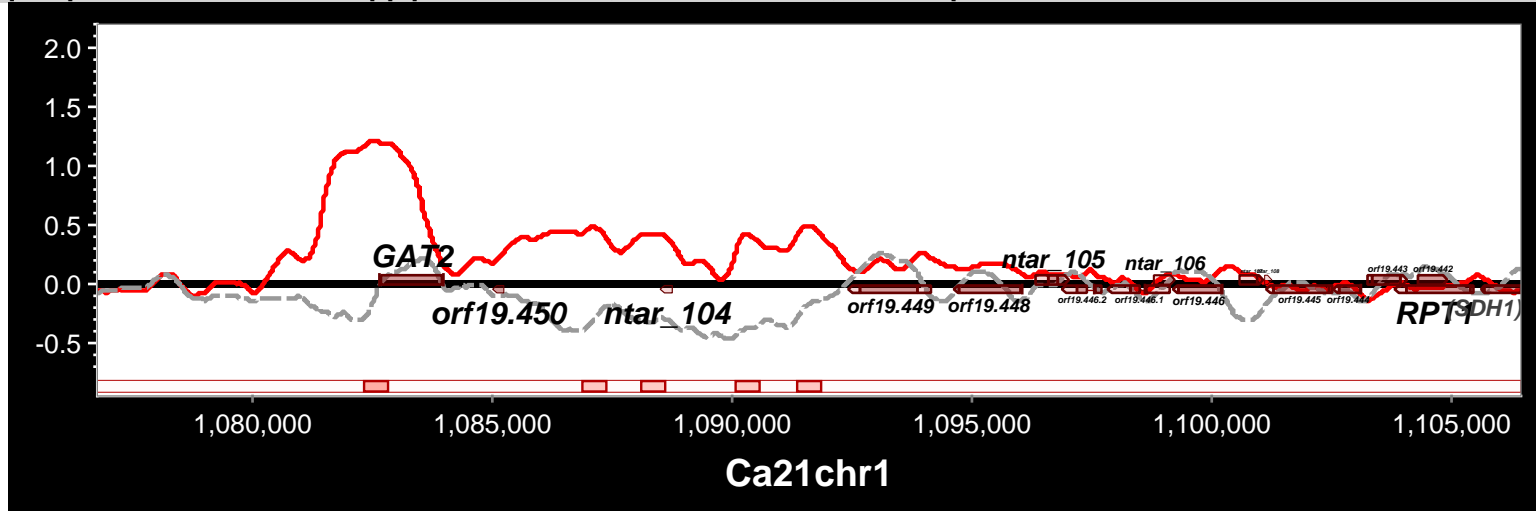

[0.494] Ca21chr2:2153614-2183297 [+] [tF(GAA)4, tV(UAC)1, MDH1-3, orf19.5322, KIN3]

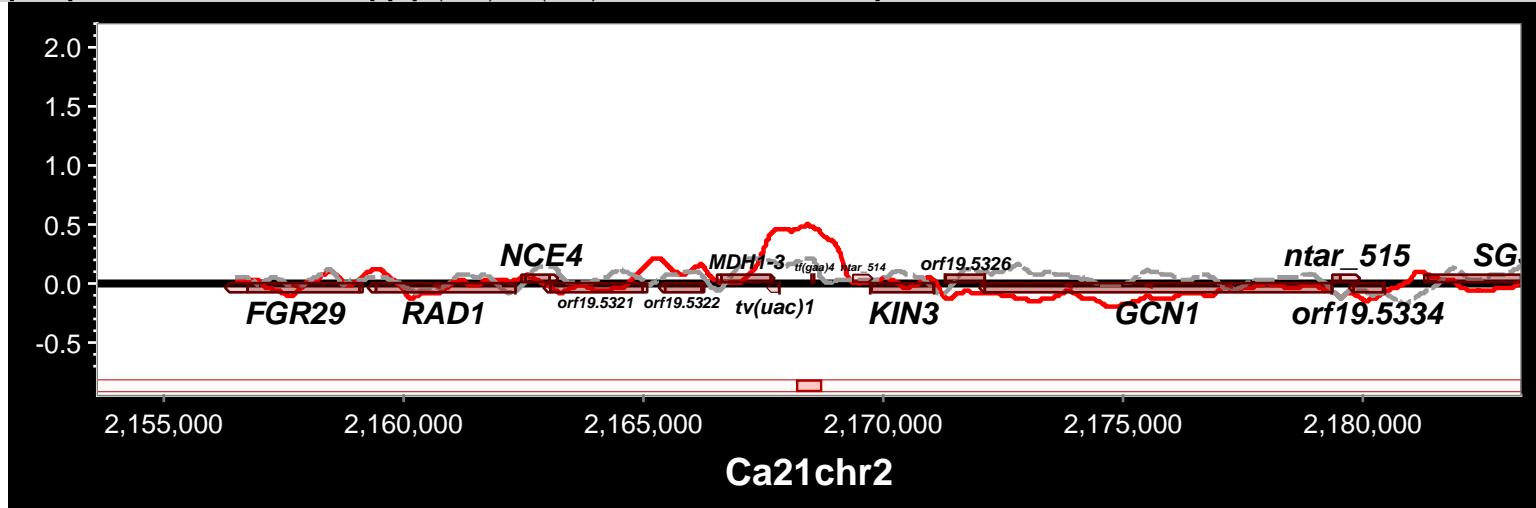

[0.492] Ca21chr1:3045926-3075609 [+] [tA(AGC)7, LCB2, orf19.5026, MODF, orf19.5030]

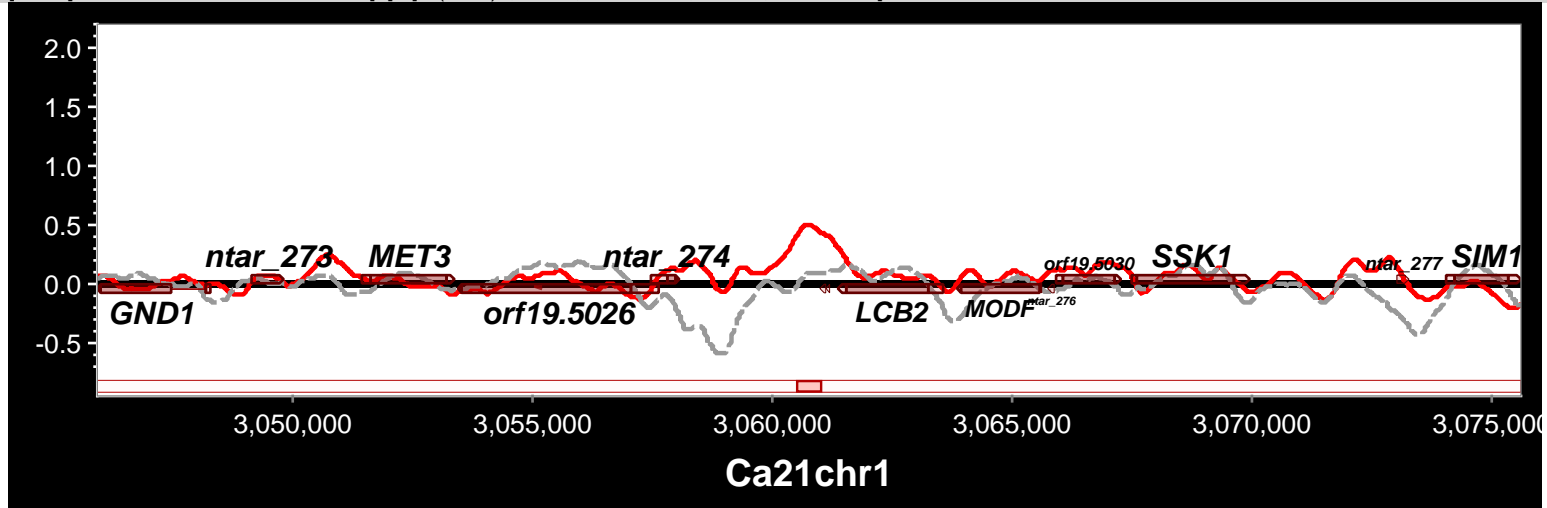

[0.491] Ca21chr4:765285-794968 [+] [tG(GCC)2, tD(GUC)4, tD(GUC)3, tD(GUC)2, SPO75]

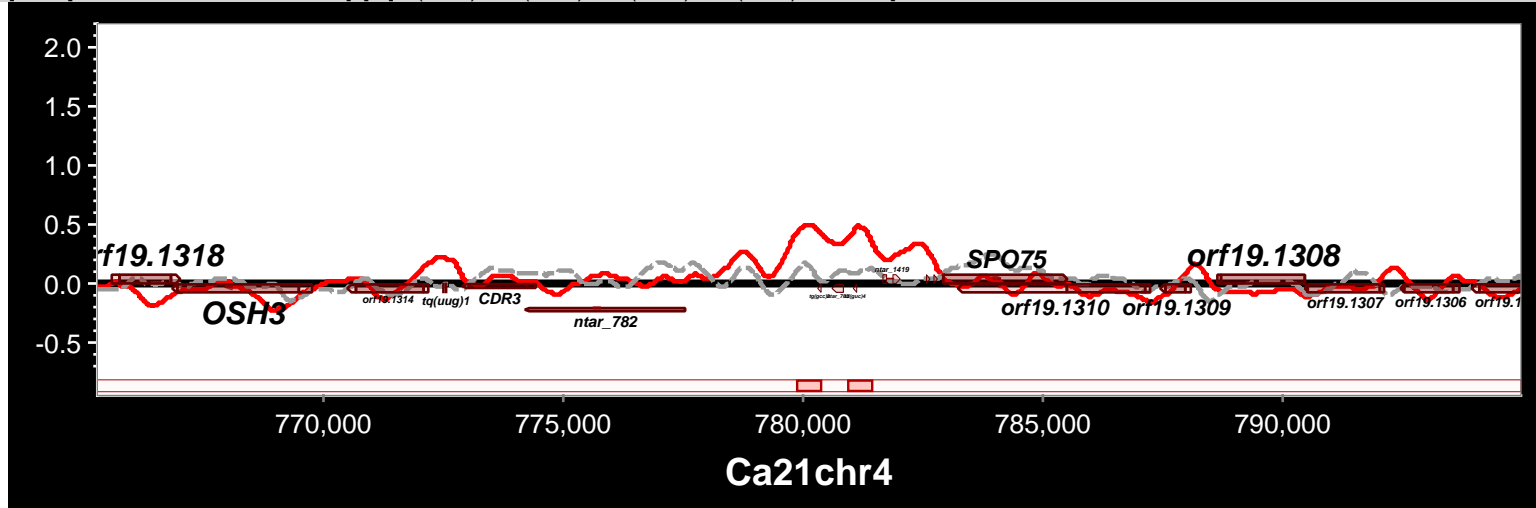

[0.487] Ca21chrR:1144127-1173810 [+] [tR(ACG)2, tR(ACG)1, PST3, orf19.5284, orf19.3512]

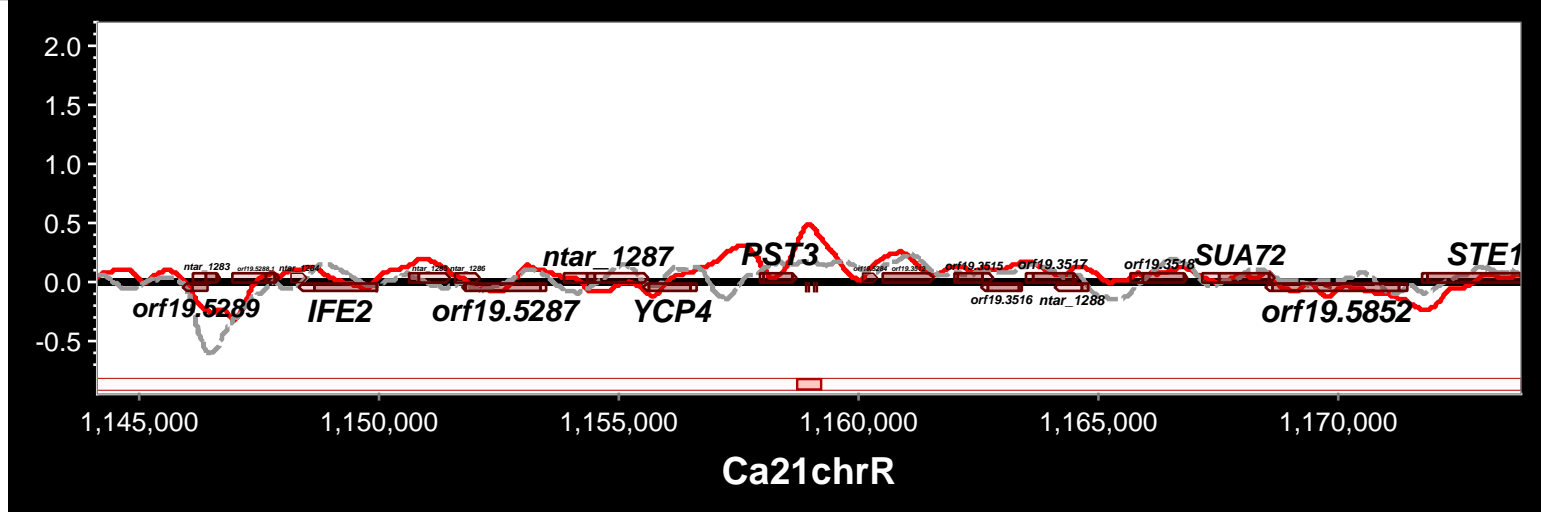

[0.485] Ca21chr1:1-29684 [+] [orf19.6103, orf19.6102, MVD, orf19.6100, CCT8]

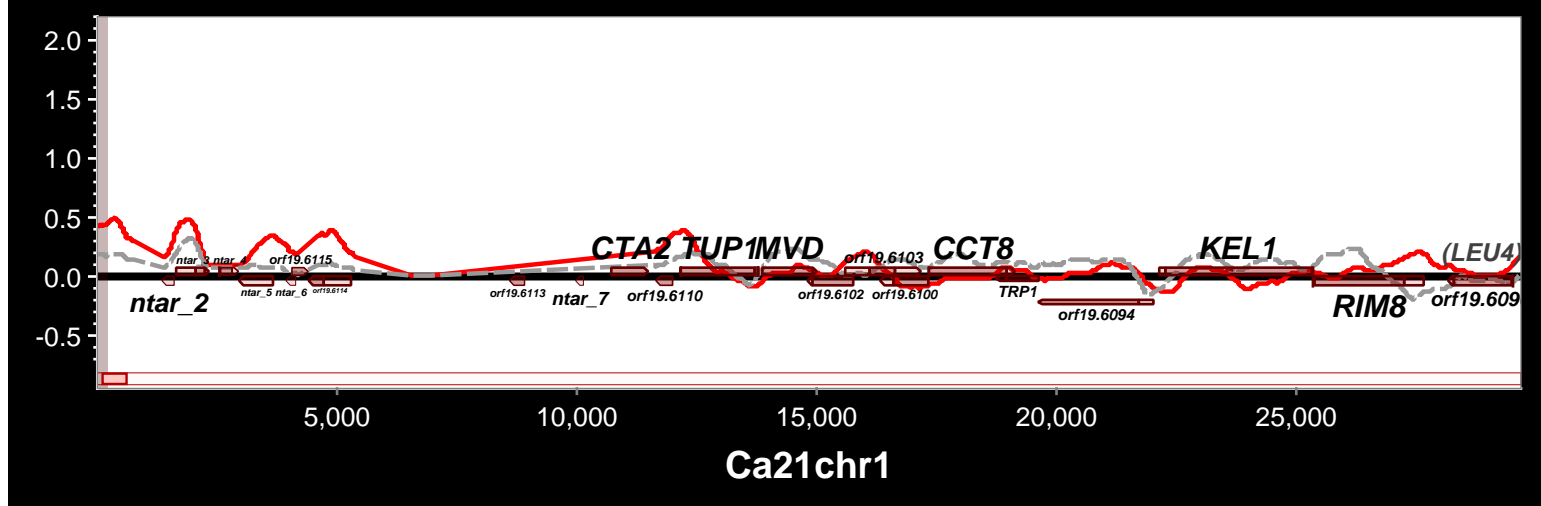

[0.483] Ca21chr4:766350-796033 [+] [tD(GUC)4, tG(GCC)2, tD(GUC)3, tD(GUC)2, SPO75]

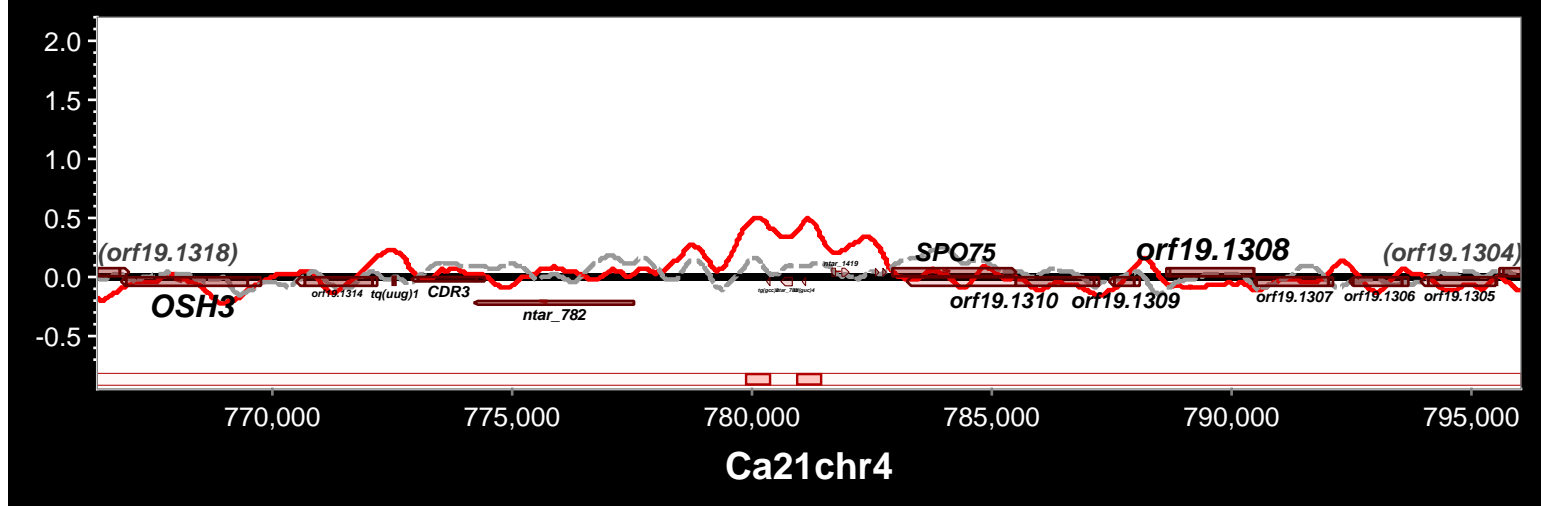

[0.483] Ca21chrR:1514166-1543849 [+] [CRZ2, ALS3, URA2, orf19.1815, orf19.1814]

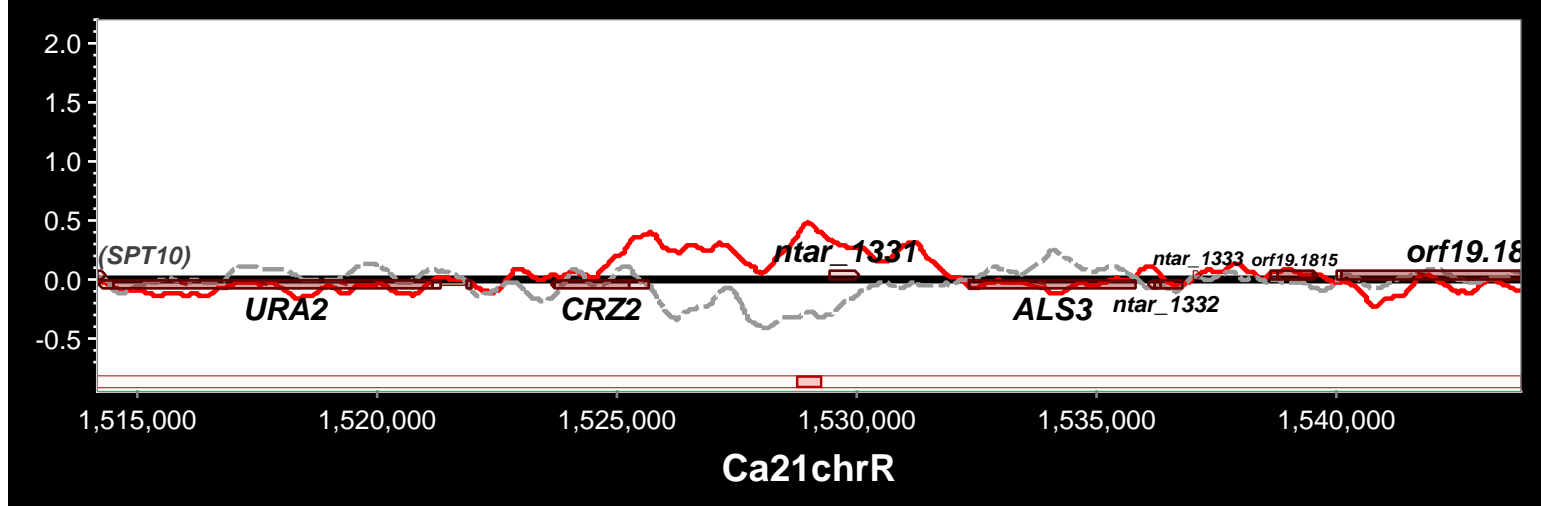

[0.482] Ca21chr1:1072286-1101969 [+] [orf19.450, GAT2, orf19.449, orf19.448, orf19.446.2]

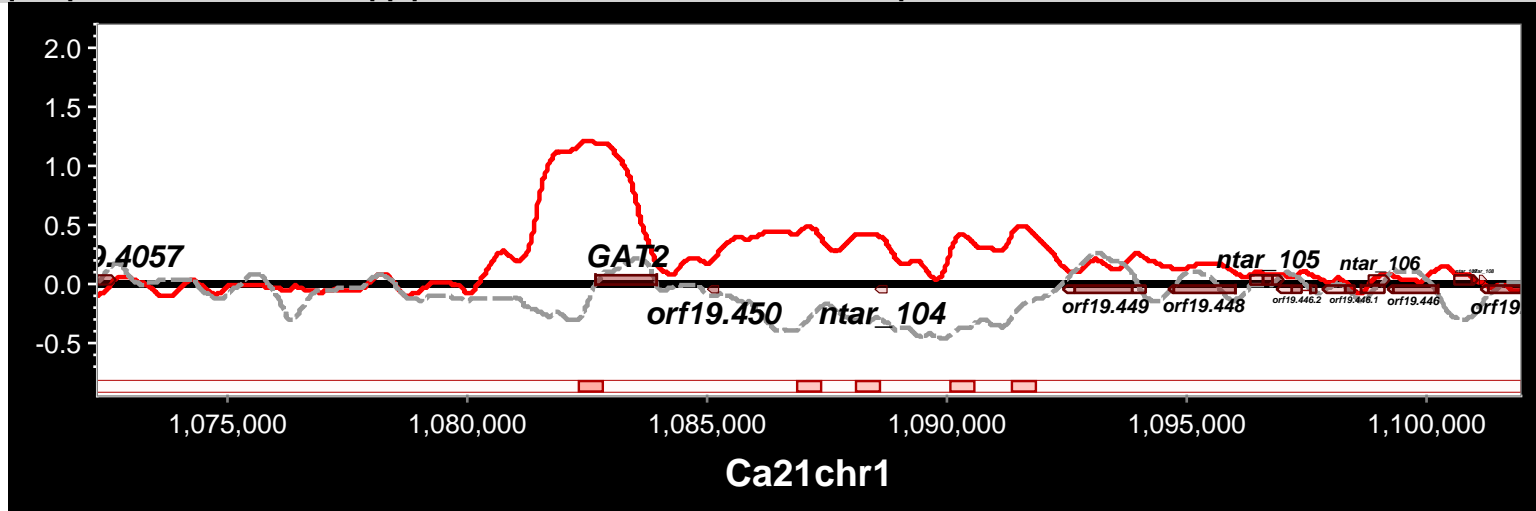

[0.475] Ca21chr3:1712342-1742025 [+] [TCC1, orf19.6736, orf19.6732, orf19.6731.1, orf19.6731]

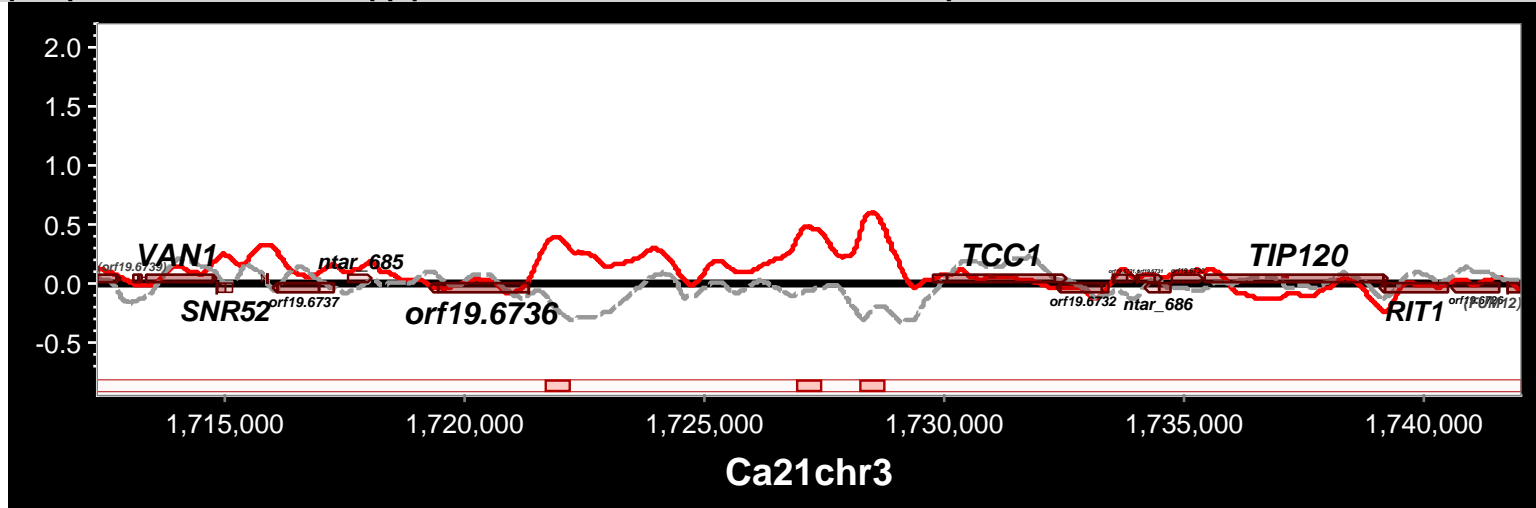

[0.473] Ca21chrR:1698886-1728569 [+] [tG(GCC)1, orf19.612, ASF1, orf19.3714, orf19.3713]

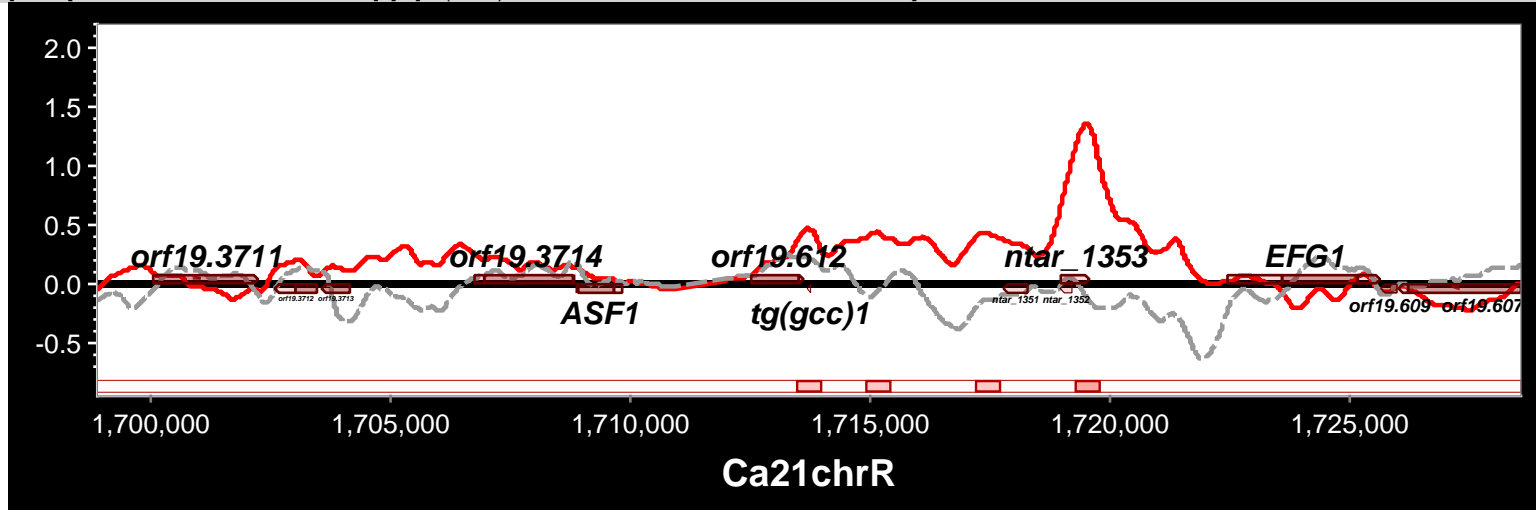

[0.472] Ca21chr5:219861-249544 [+] [orf19.1961, orf19.1963, orf19.1964, BUD23, orf19.1967]

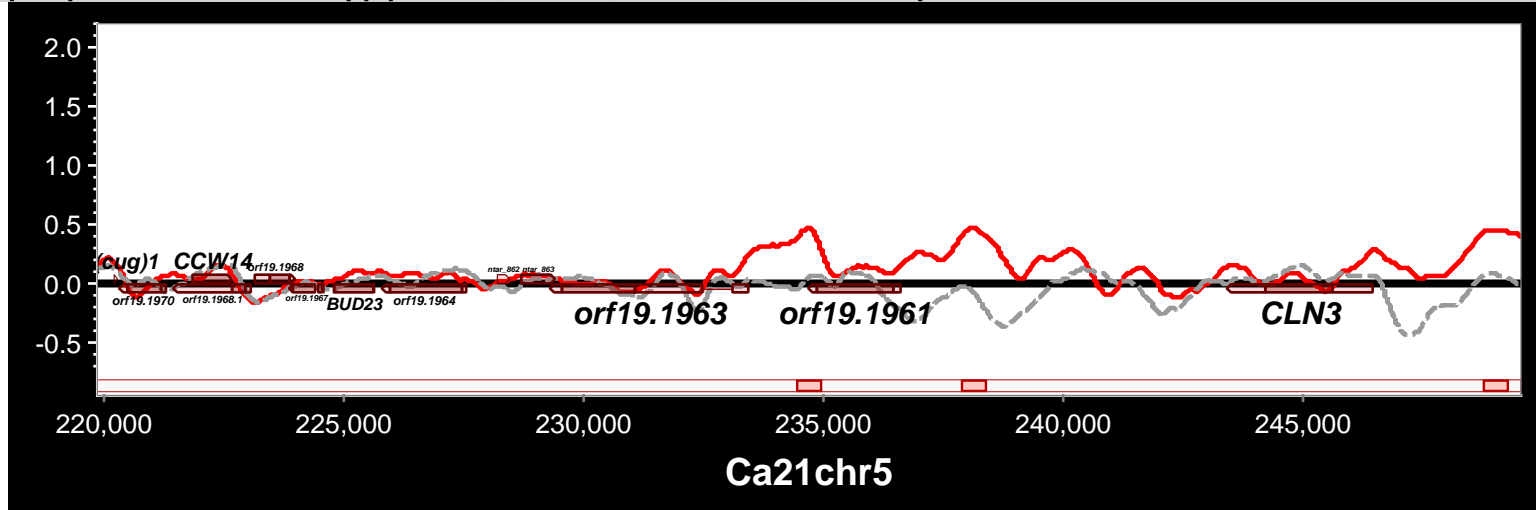



[0.471] Ca21chr1:2179299-2208982 [+] [SFU1, SWE1, DBP3, ERO1, orf19.4872]

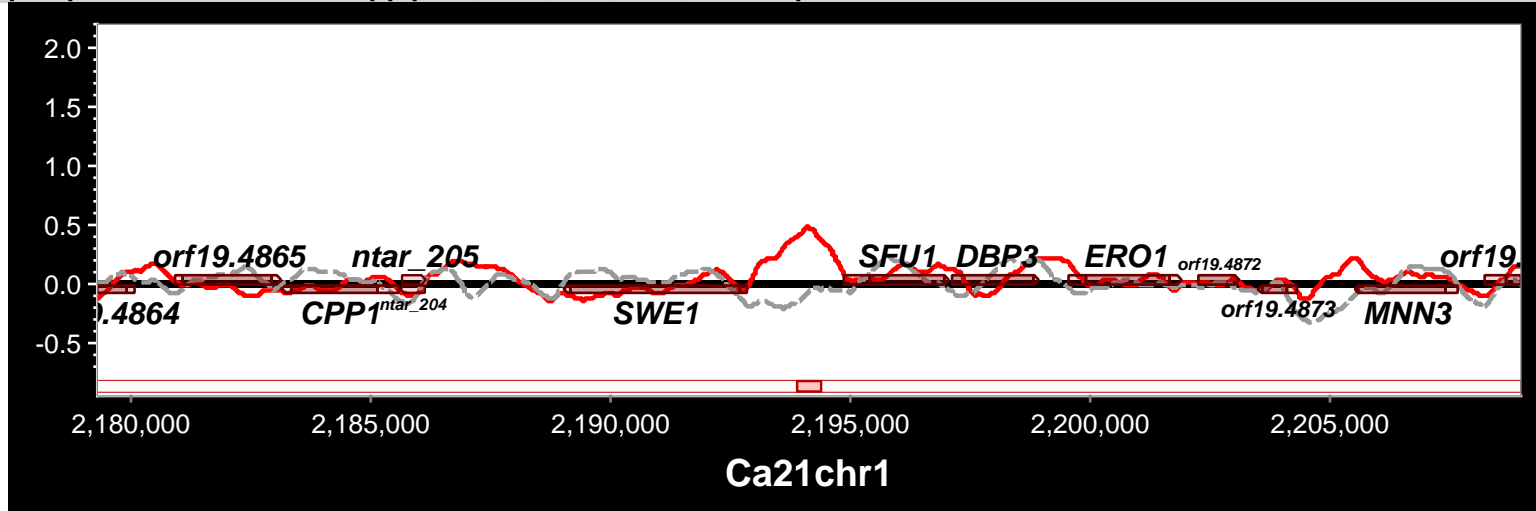

[0.467] Ca21chr7:437280-466963 [+] [CUP9, EXO70, LIG1, GRX1, orf19.6509]

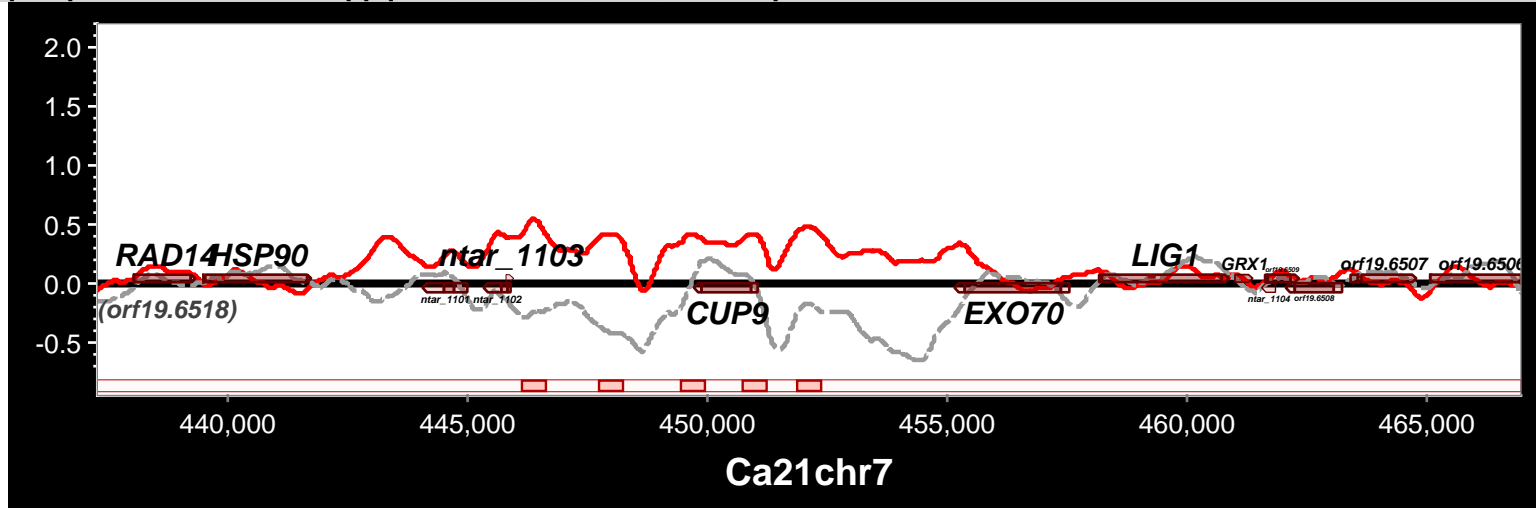

[0.464] Ca21chr1:499847-529530 [+] [orf19.2930, GSC1, orf19.2933, orf19.2934, RPL10]

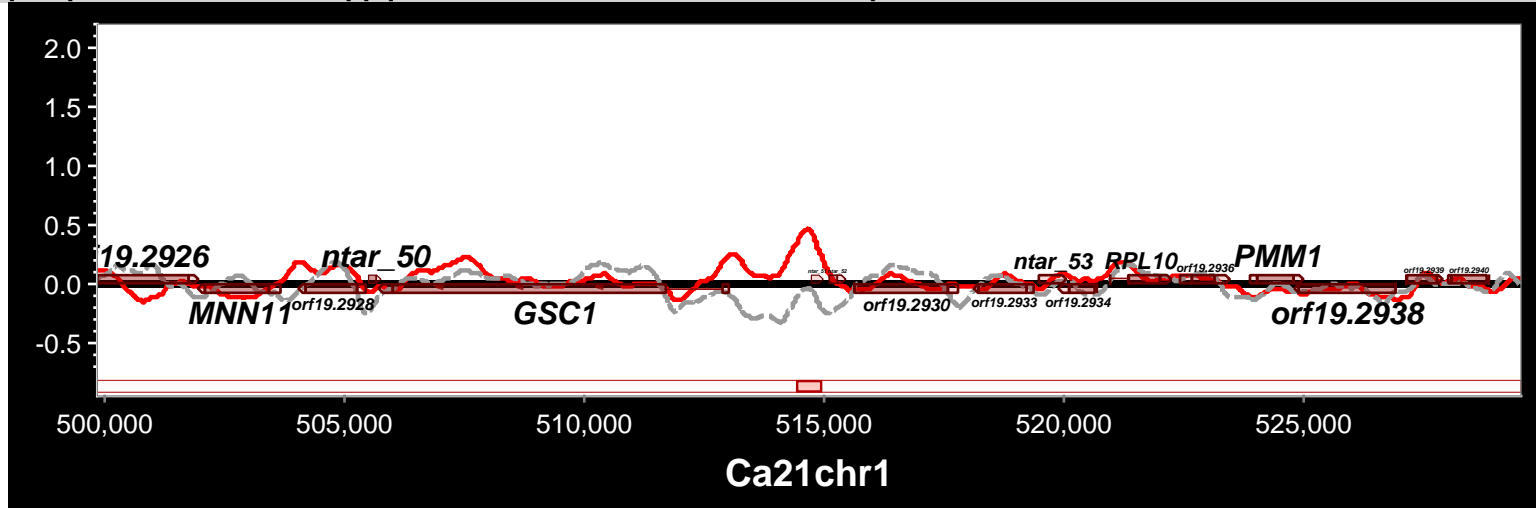

[0.463] Ca21chr5:223297-252980 [+] [orf19.1961, orf19.1963, CLN3, orf19.1964, BUD23]

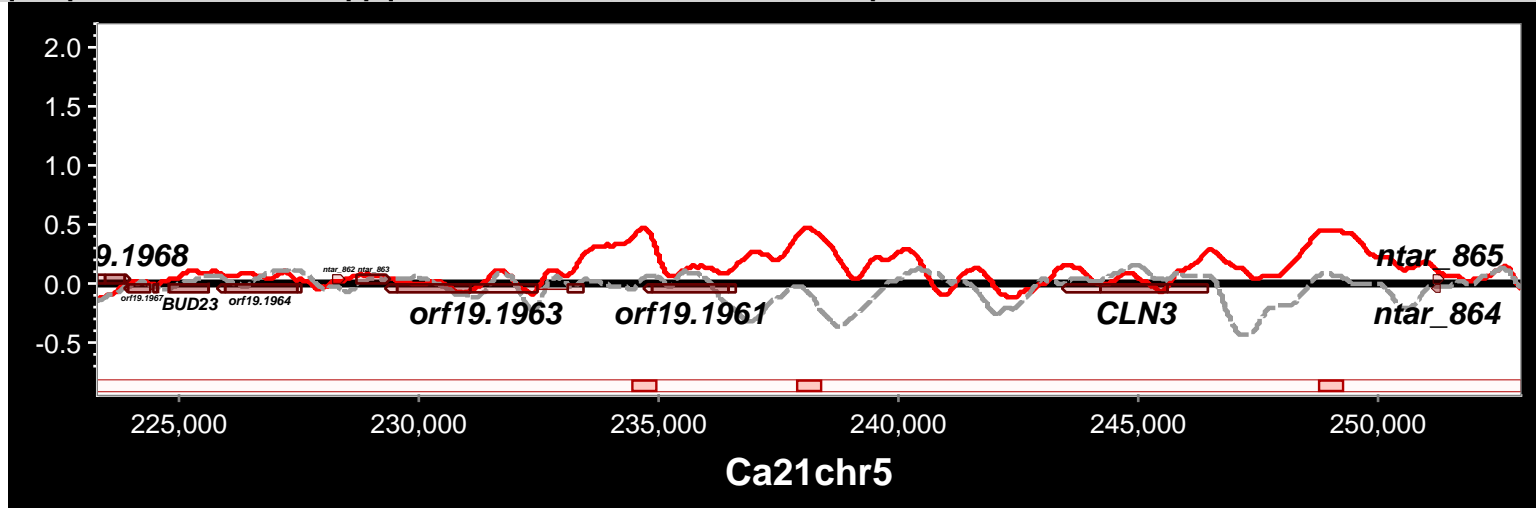

[0.462] Ca21chrR:509543-539226 [+] [IDP2, GEF2, ERG25, orf19.3730, orf19.3728]

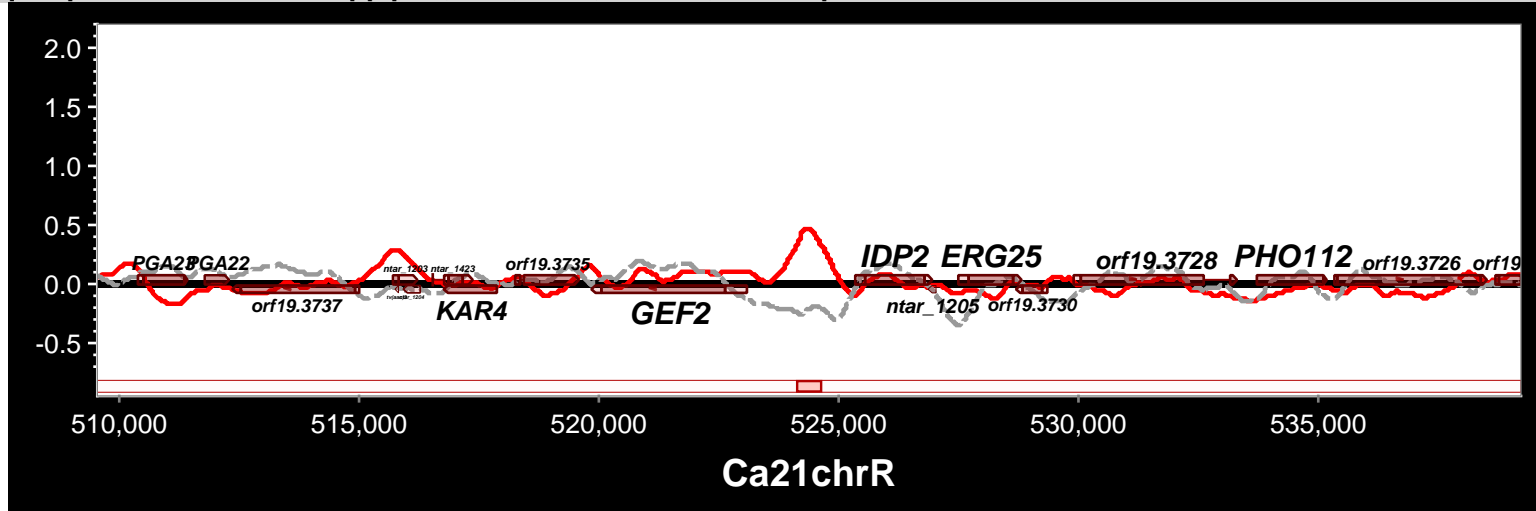

[0.461] Ca21chr7:99485-129168 [+] [orf19.7054, GAC1, orf19.7056, orf19.7052, orf19.7051]

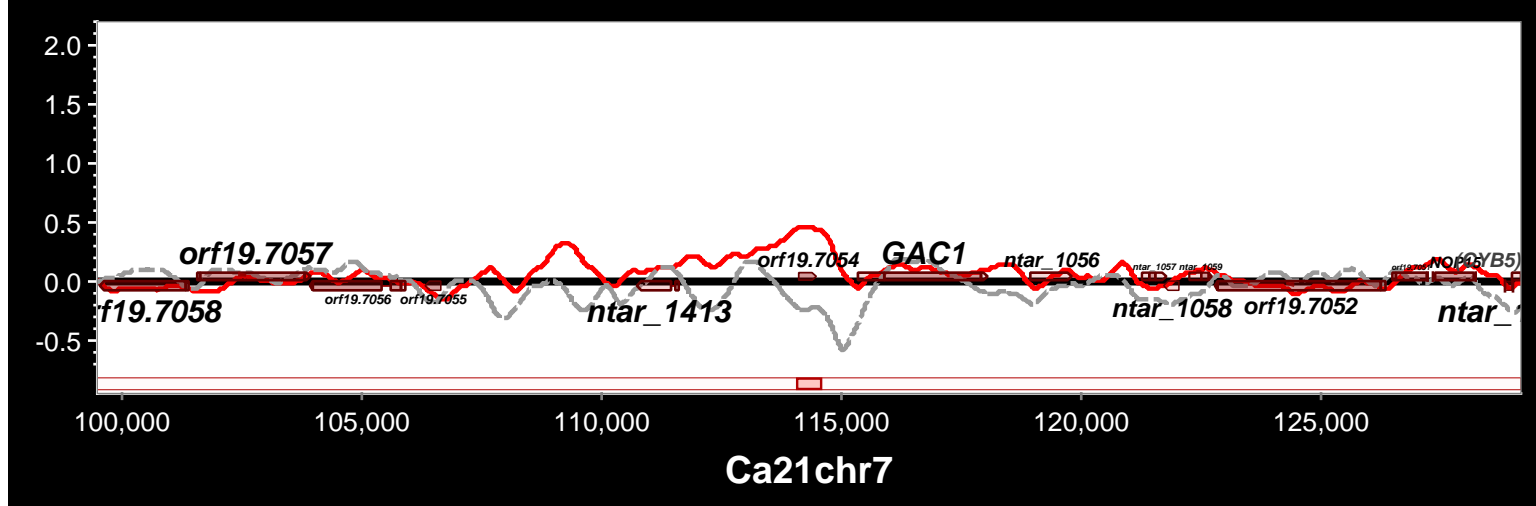

[0.458] Ca21chr7:687977-717660 [+] [orf19.5131, orf19.5132, orf19.5133, PDI1, orf19.5129]

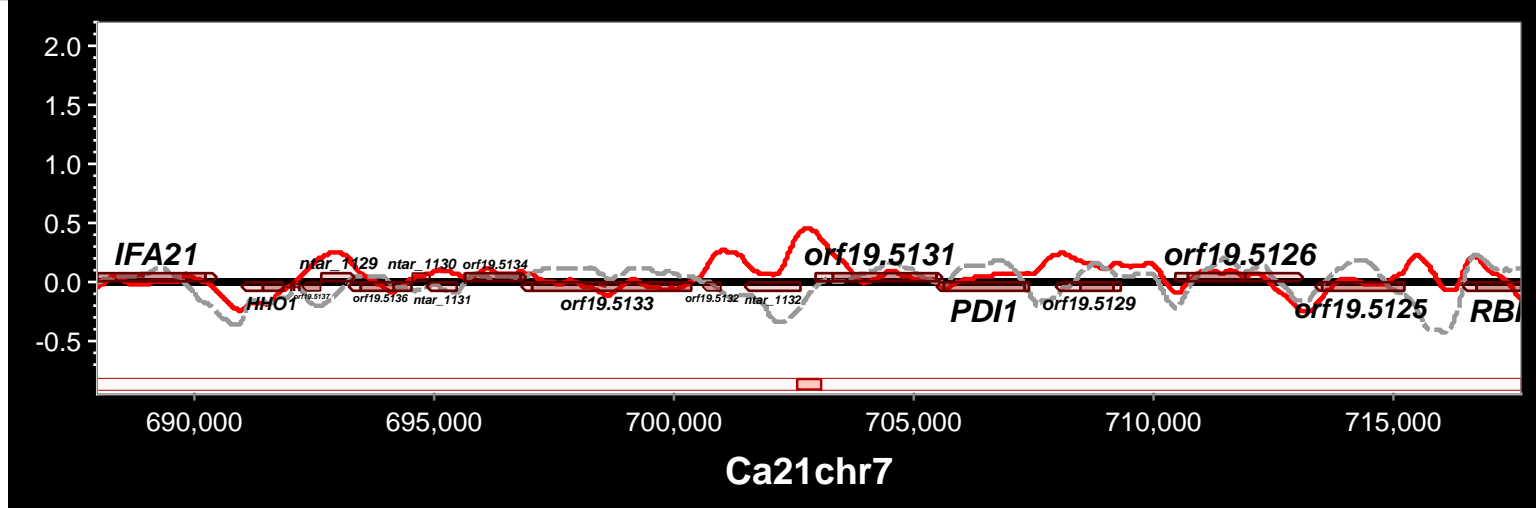

[0.454] Ca21chr2:724508-754191 [+] [ADAEC, orf19.867, RAD32, orf19.871, orf19.872]

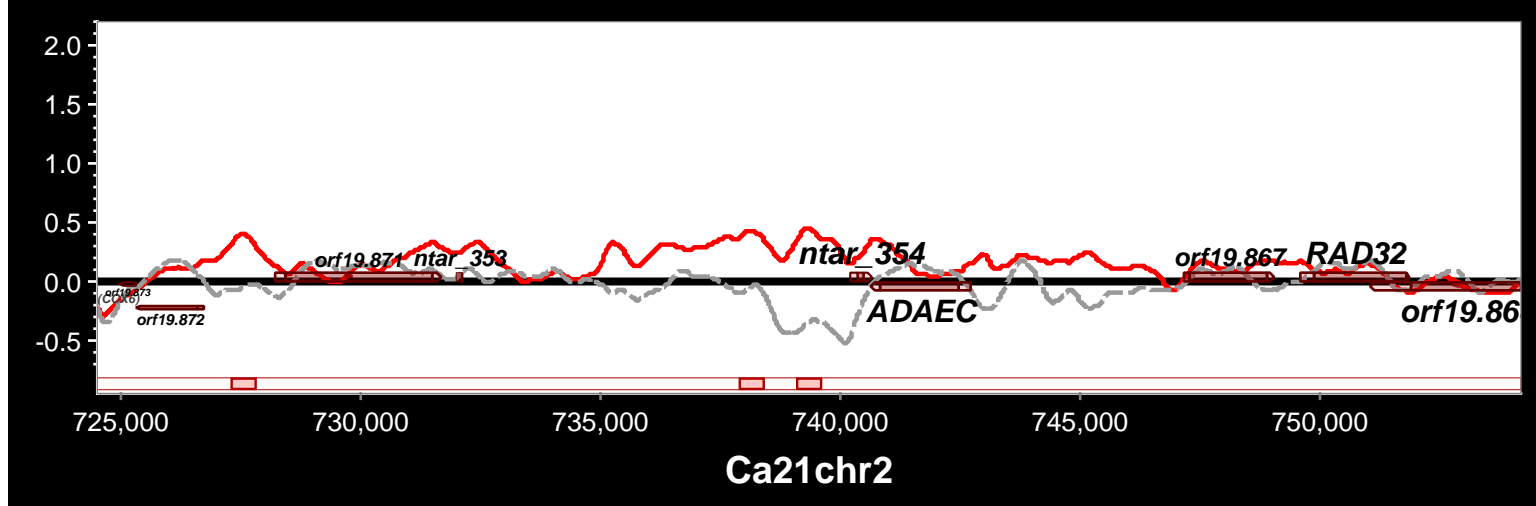



[0.451] Ca21chr5:234179-263862 [+] [CLN3, orf19.1959, orf19.1961, CYC3, orf19.1956]

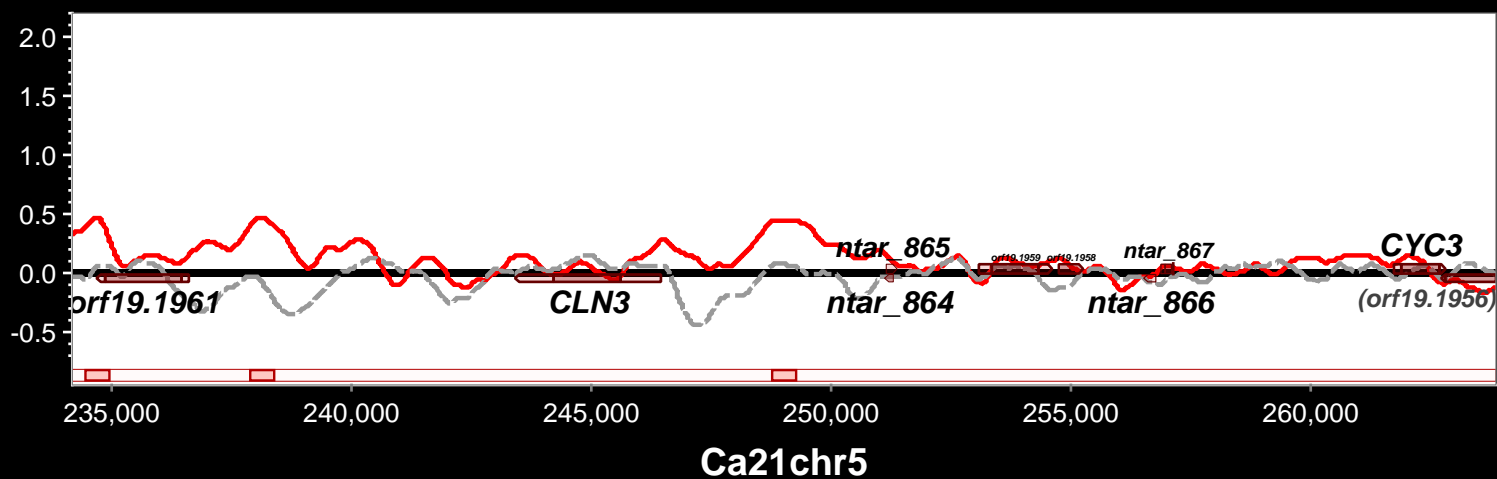

[0.448] Ca21chr3:577374-607057 [+] [tR(UCU)1, tF(GAA)1, orf19.265, orf19.264, orf19.263.1]

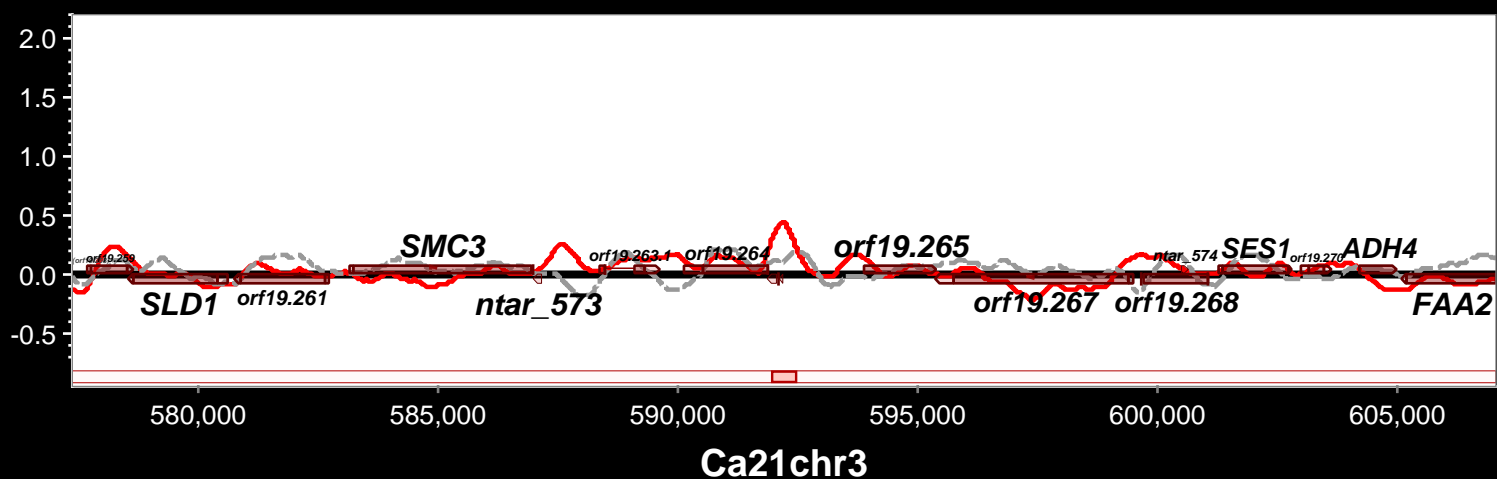

[0.443] Ca21chrR:1036359-1066042 [+] [orf19.6308, MSS11, orf19.6307, orf19.6310, orf19.6306]

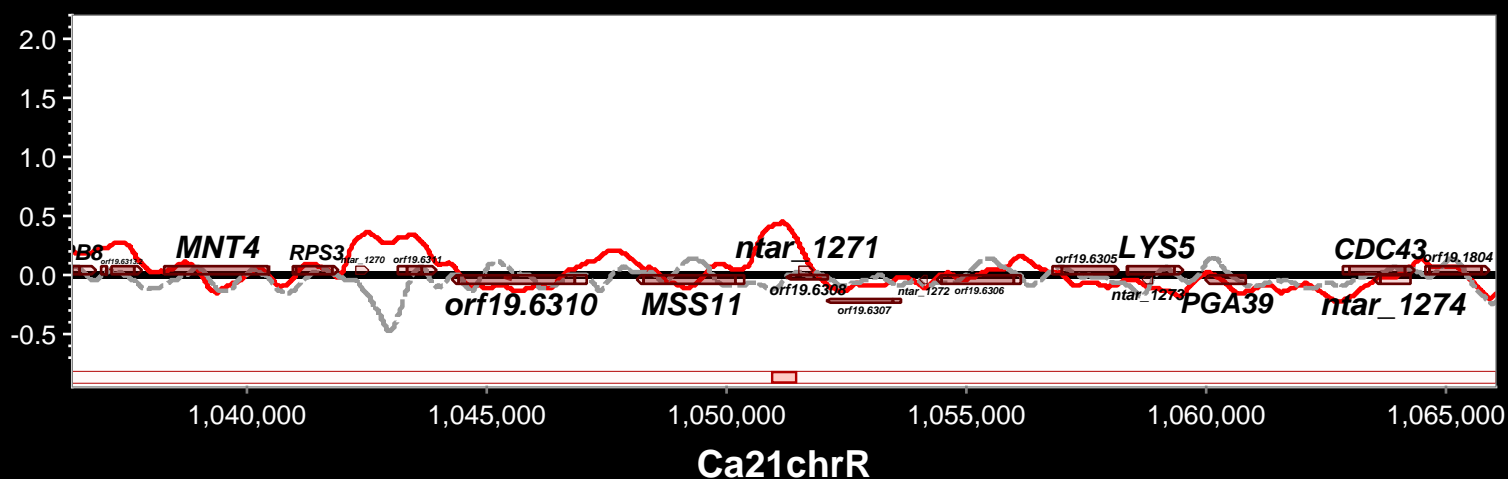

[0.442] Ca21chrR:1700329-1730012 [+] [tG(GCC)1, orf19.612, ASF1, orf19.3714, EFG1]

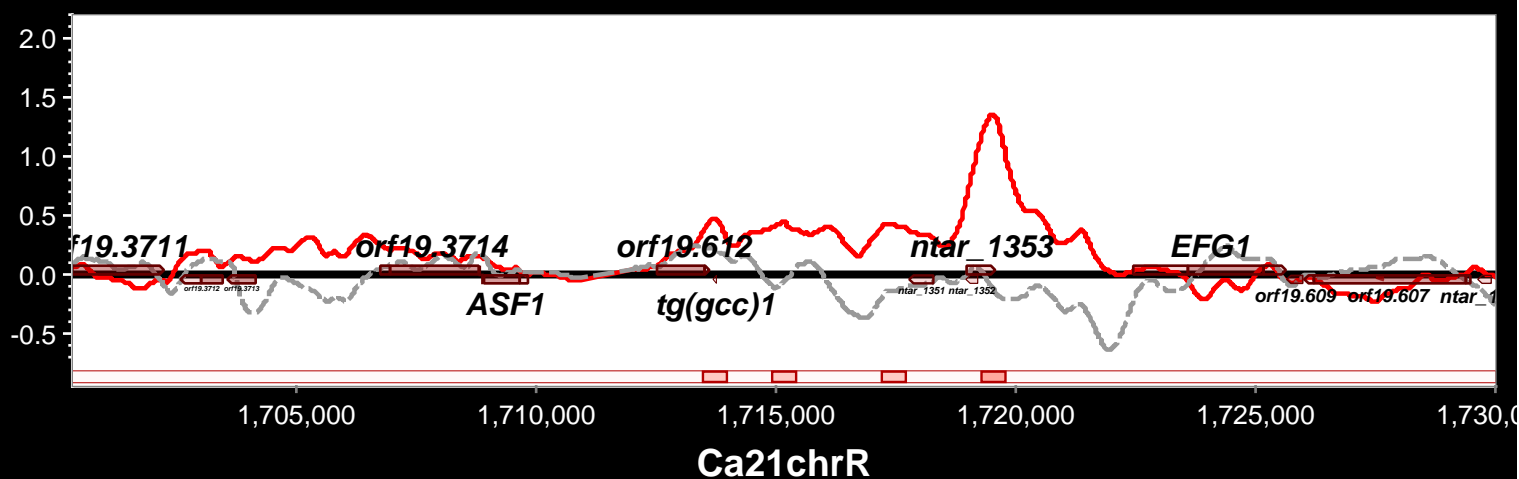

[0.441] Ca21chrR:1868007-1897690 [+] [tG(GCC)6, tE(UUC)7, orf19.6449, orf19.6448, ARF1]

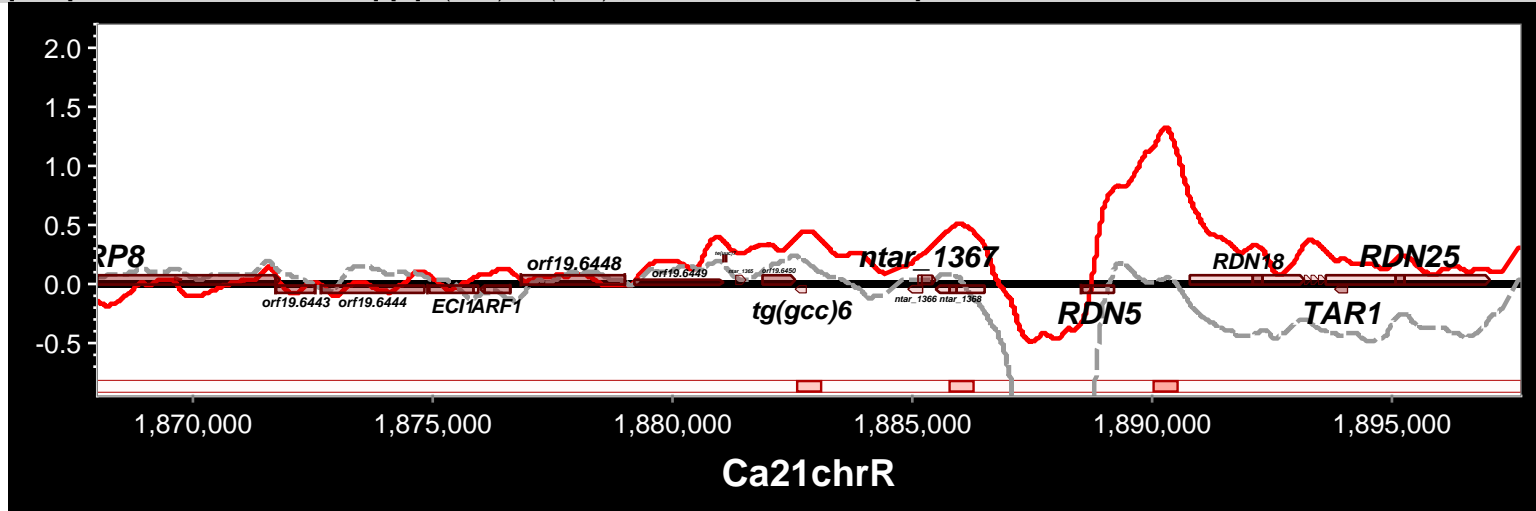

[0.434] Ca21chr1:2836180-2865863 [+] [OP4, orf19.4936, orf19.4936.1, FAD3, orf19.4932]

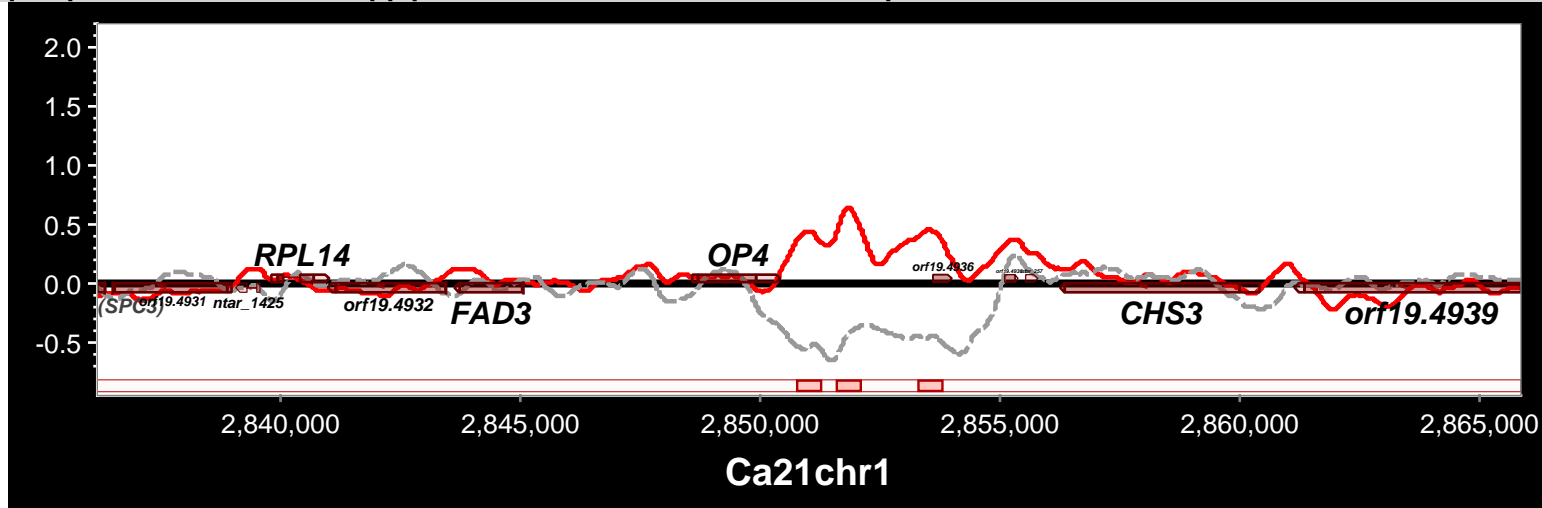

[0.433] Ca21chrR:1176209-1205892 [+] [tC(GCA)1, tC(GCA)2, orf19.5844, RNR3, orf19.5843]

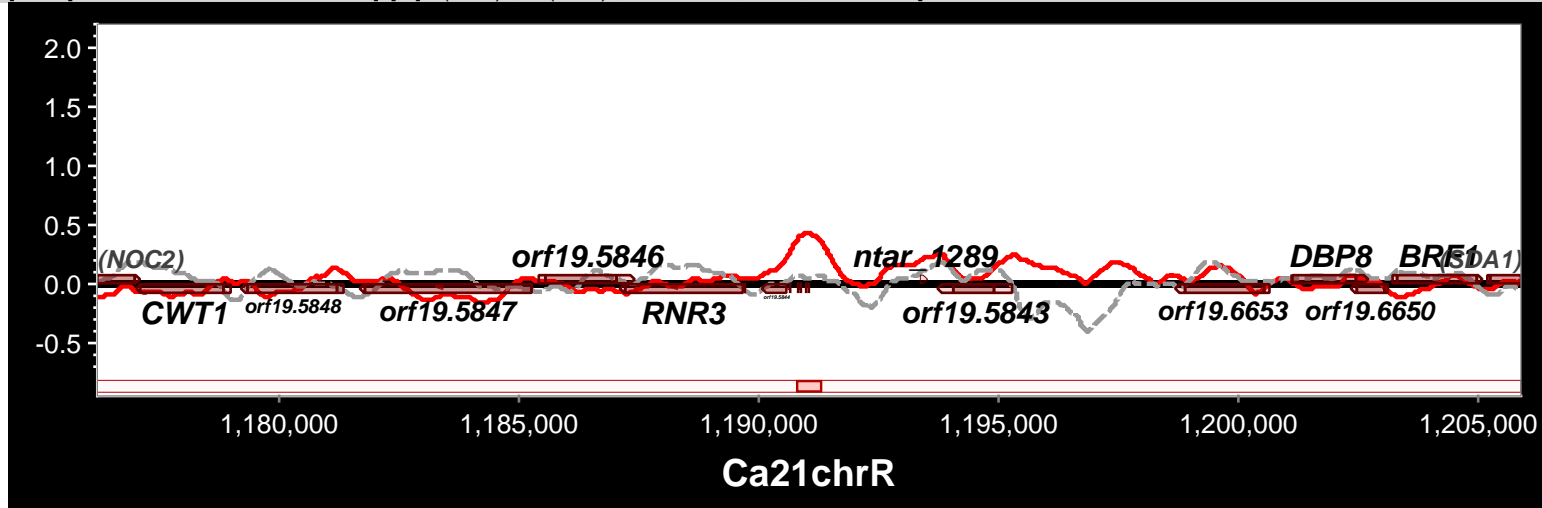

[0.431] Ca21chr5:1069102-1098785 [+] [orf19.3983, orf19.3984, orf19.3982, MAL31, orf19.3980]

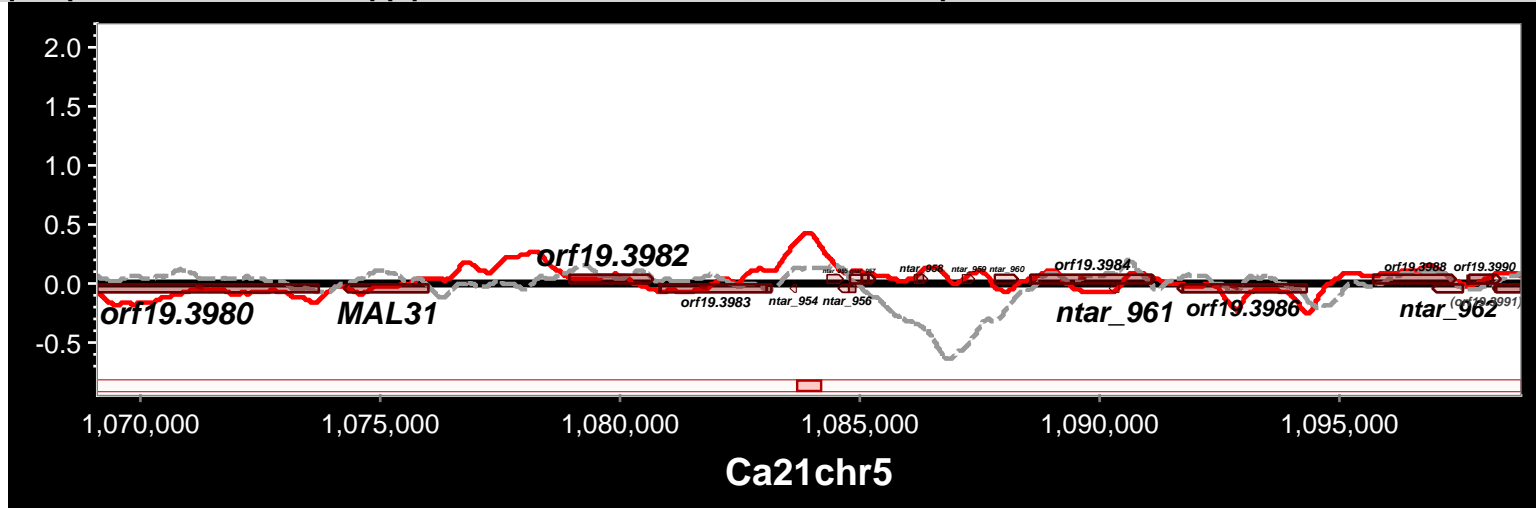

[0.431] Ca21chrR:1702616-1732299 [+] [tG(GCC)1, orf19.612, EFG1, ASF1, orf19.609]

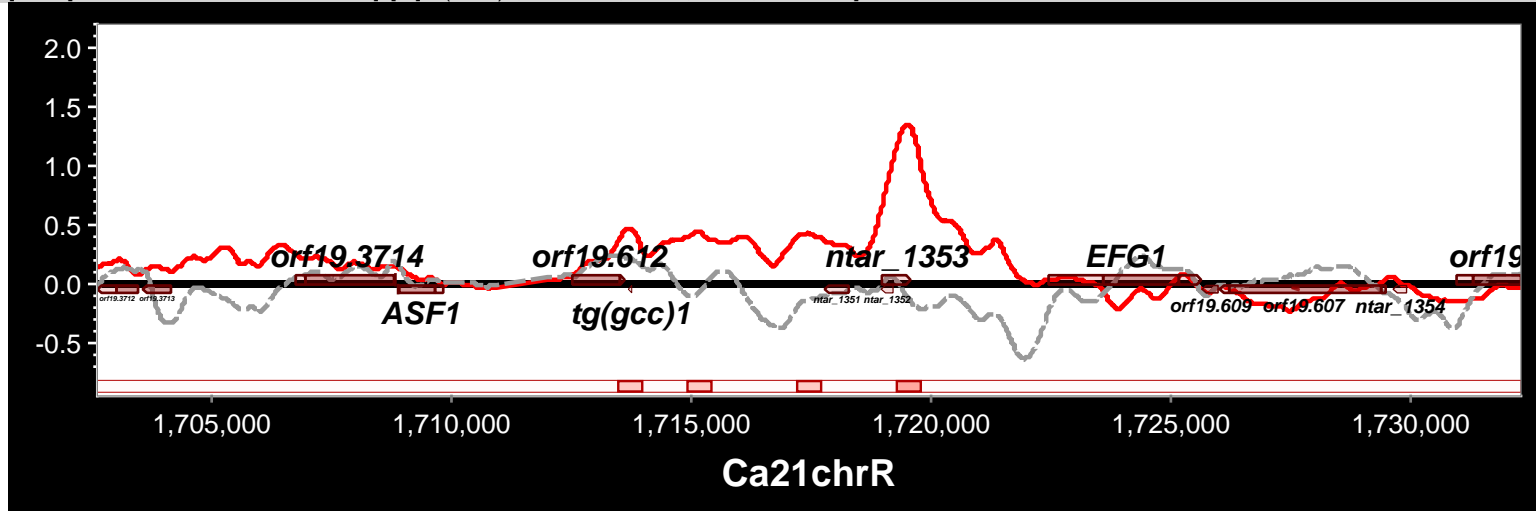

[0.43] Ca21chr2:723311-752994 [+] [ADAEC, orf19.867, orf19.871, orf19.872, RAD32]

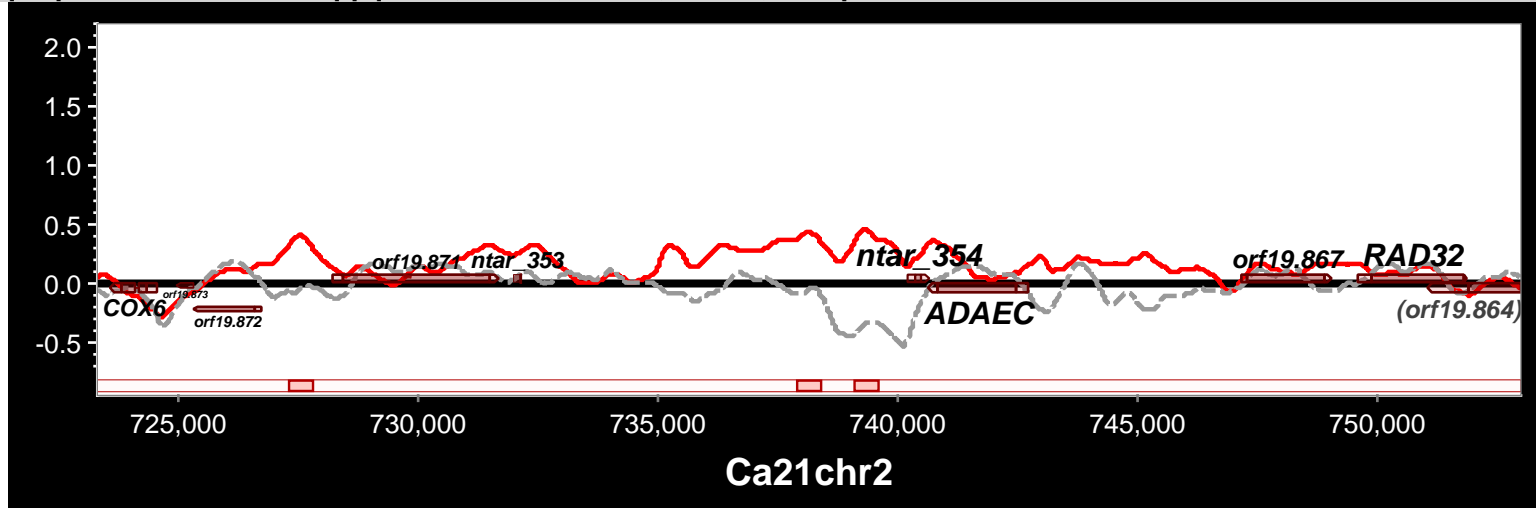

[0.43] Ca21chr3:693507-723190 [+] [orf19.334, FCY2, tE(UUC)1, orf19.332.1, orf19.335]

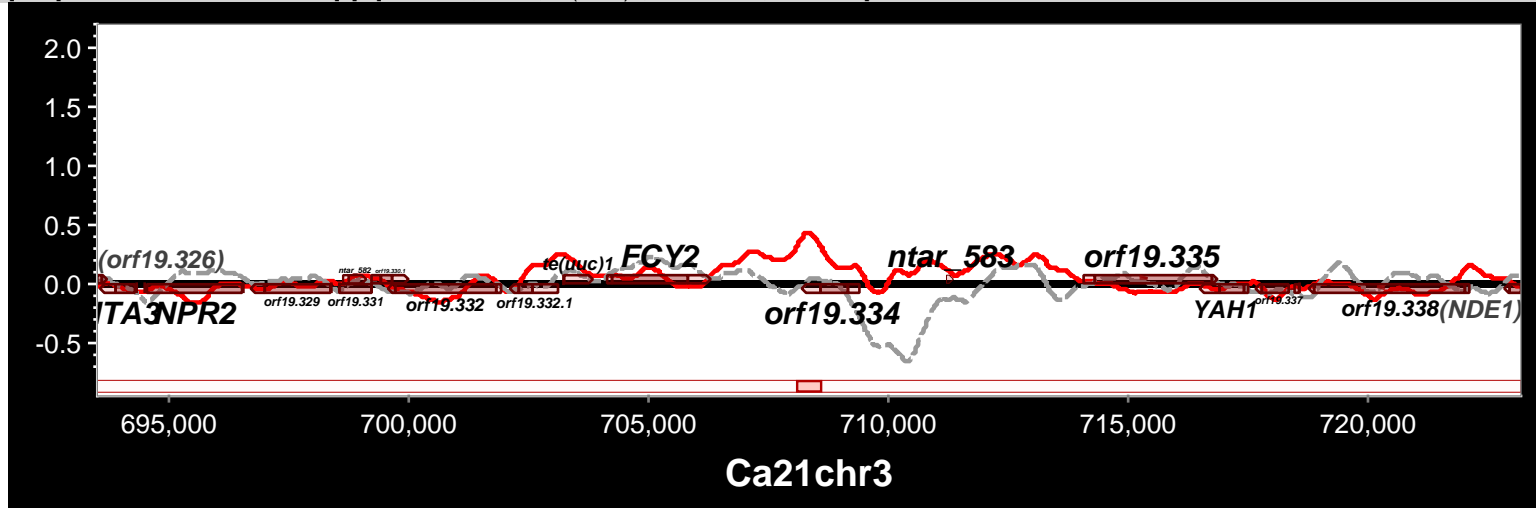

[0.43] Ca21chr3:1143447-1173130 [+] [orf19.6003, HGT5, RPL8B, orf19.6007, SAP3]

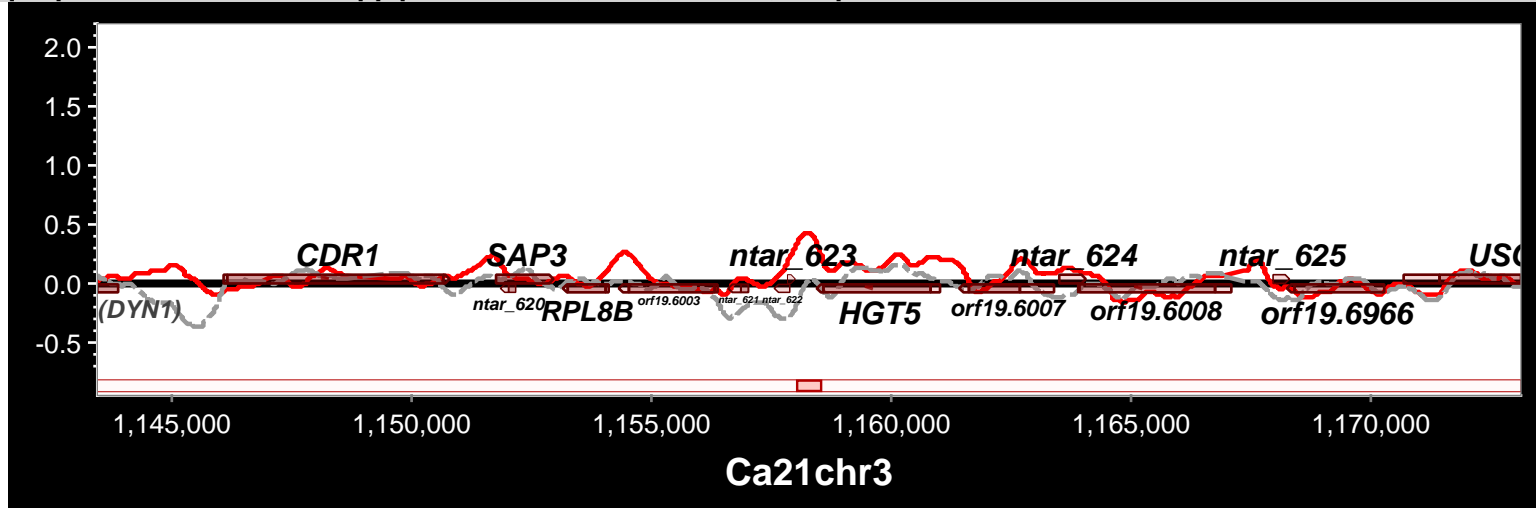

[0.43] Ca21chr7:714833-744516 [+] [LIP8, orf19.1344, orf19.1343, SHM1, PRR2]

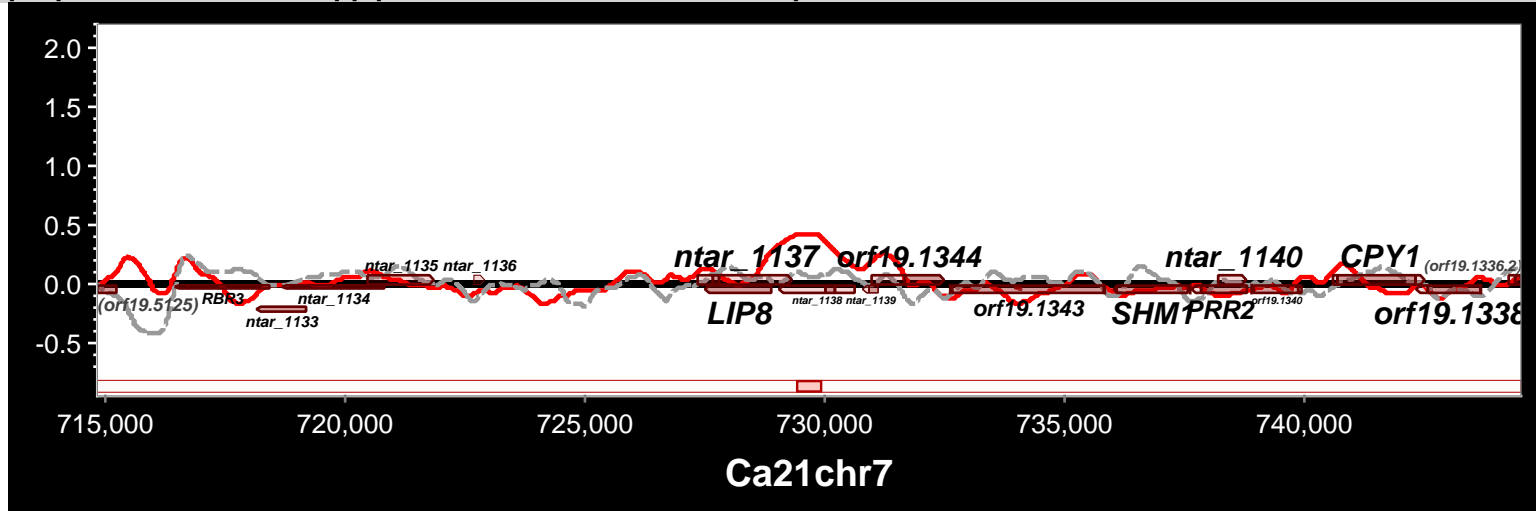

[0.43] Ca21chr7:902672-932355 [+] [NRG1, orf19.7151, orf19.7152, orf19.7149, orf19.7153]

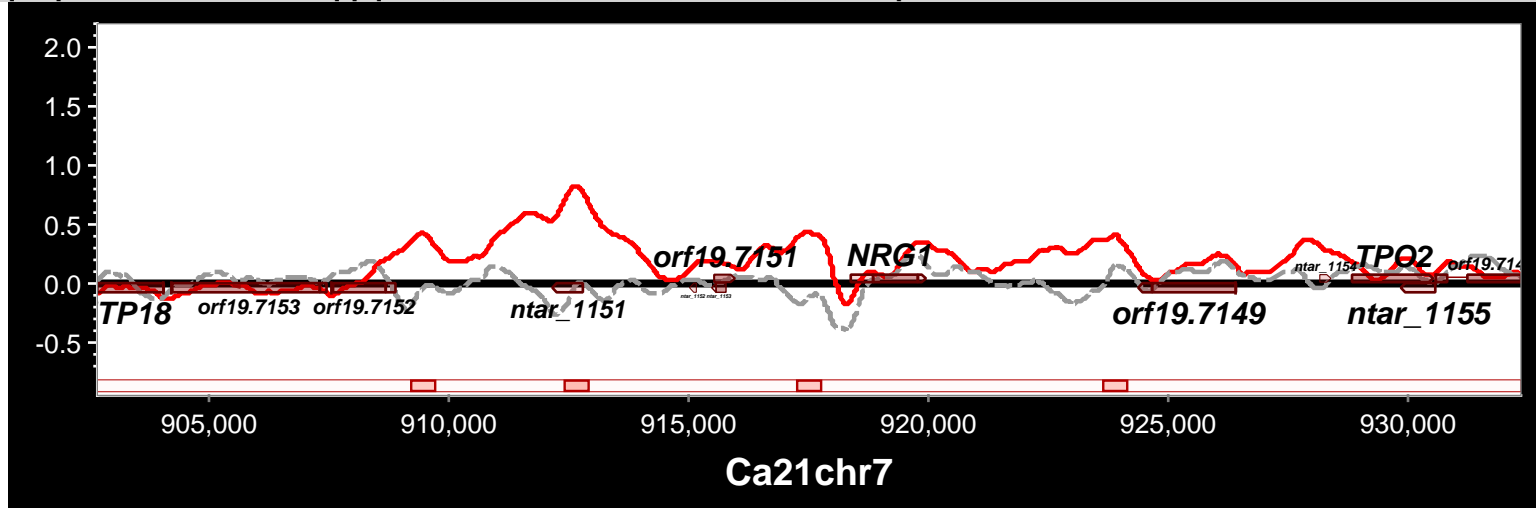

[0.43] Ca21chrR:1-29684 [+] [INO2, orf19.7538, BNR1, orf19.7539.1, tL(CAA)6]

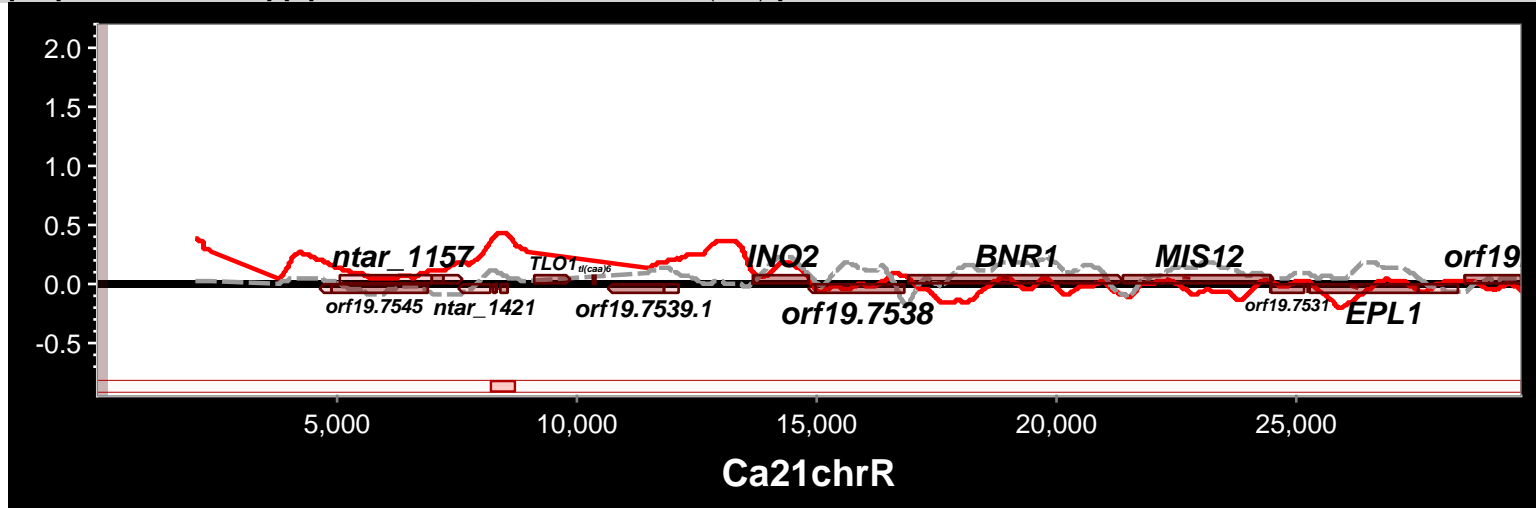

[0.423] Ca21chr4:548065-577748 [+] [orf19.2726, GRX3, orf19.2725, orf19.2728, orf19.2730]

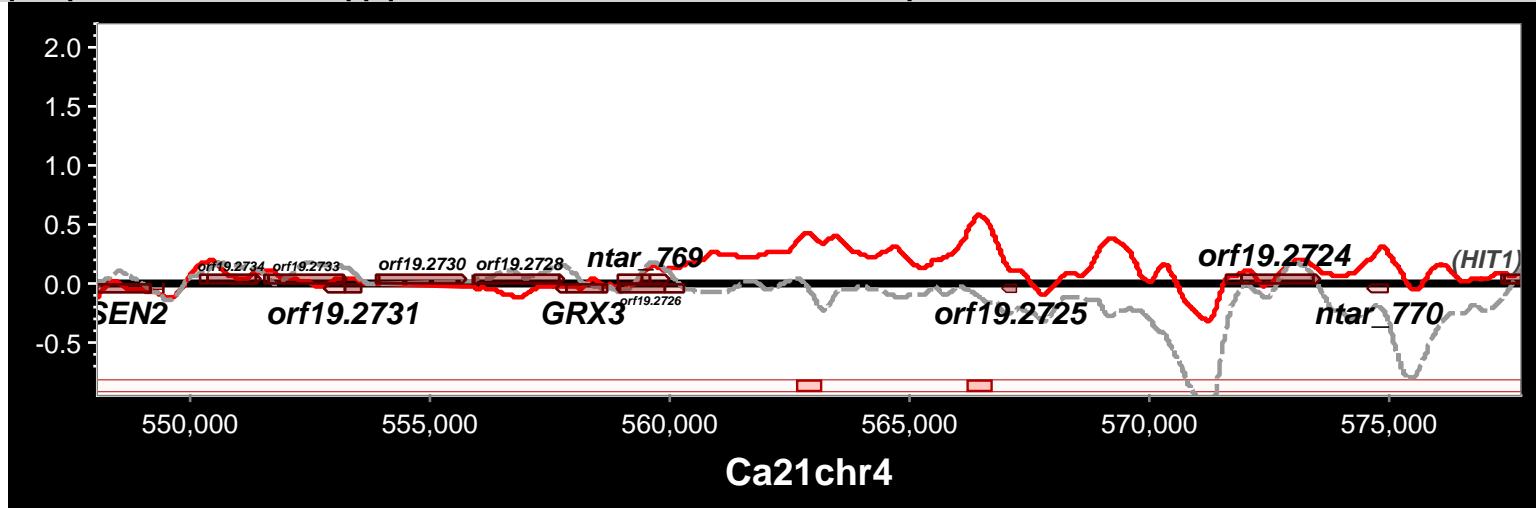

[0.42] Ca21chr1:1073513-1103196 [+] [orf19.450, orf19.449, GAT2, orf19.448, orf19.446.2]

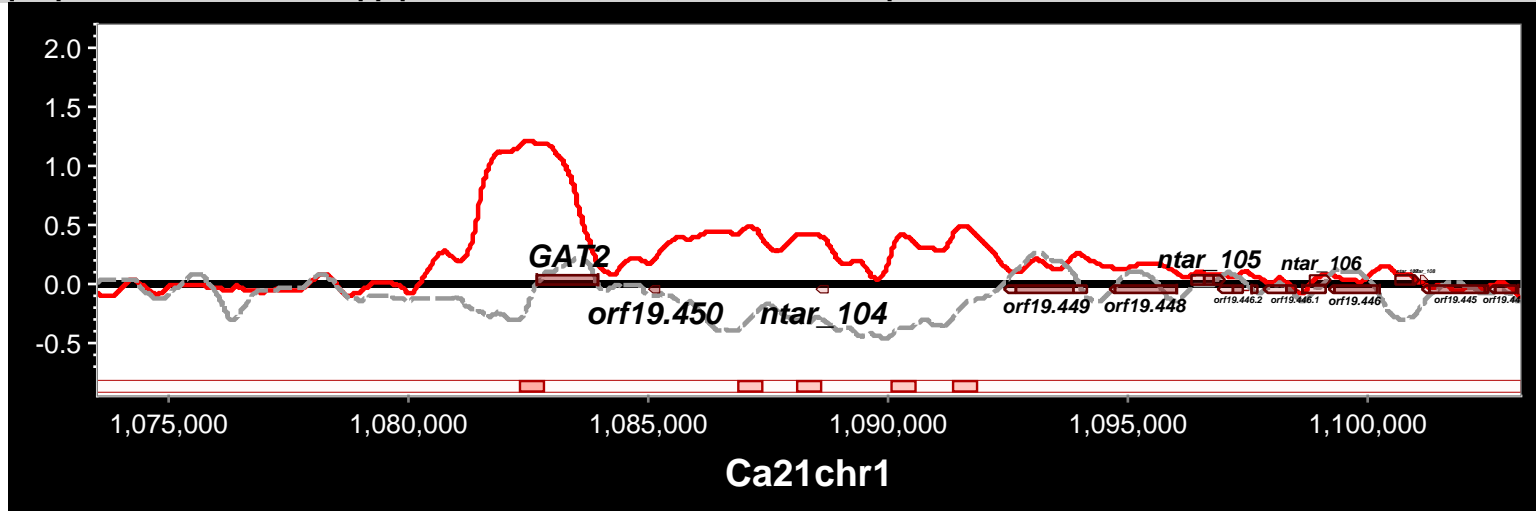

[0.42] Ca21chr1:1075481-1105164 [+] [orf19.449, orf19.450, orf19.448, orf19.446.2, GAT2]

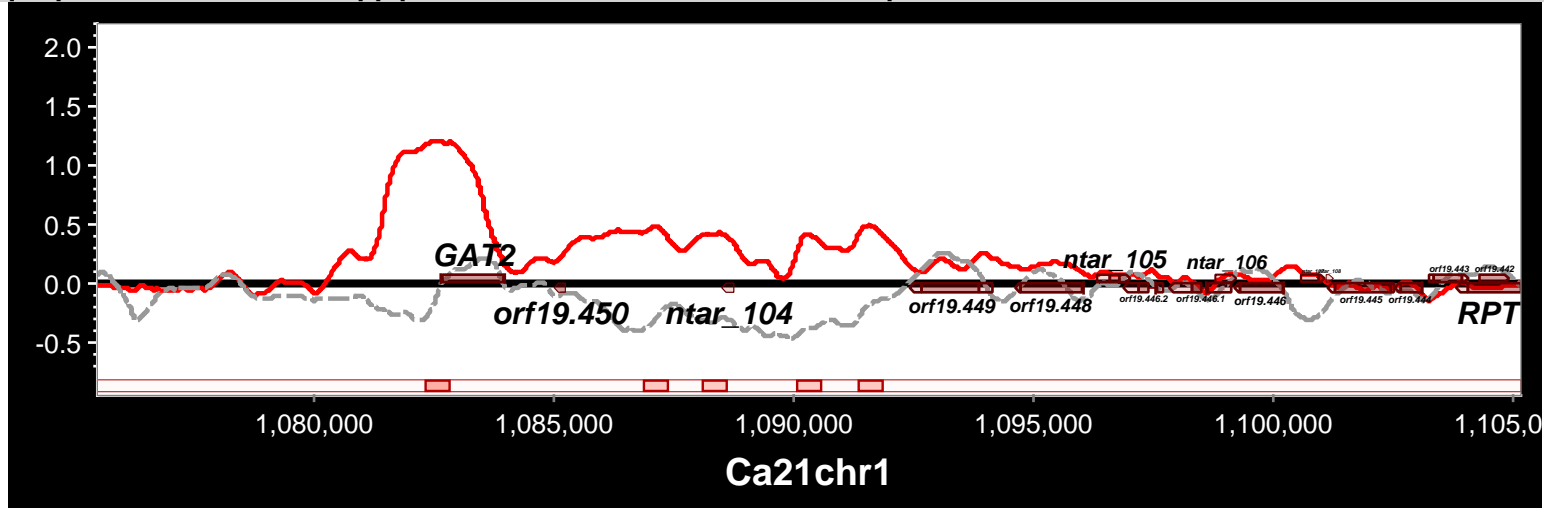

[0.42] Ca21chr4:114057-143740 [+] [orf19.4167, orf19.4168, orf19.4166, orf19.4169, orf19.4170]

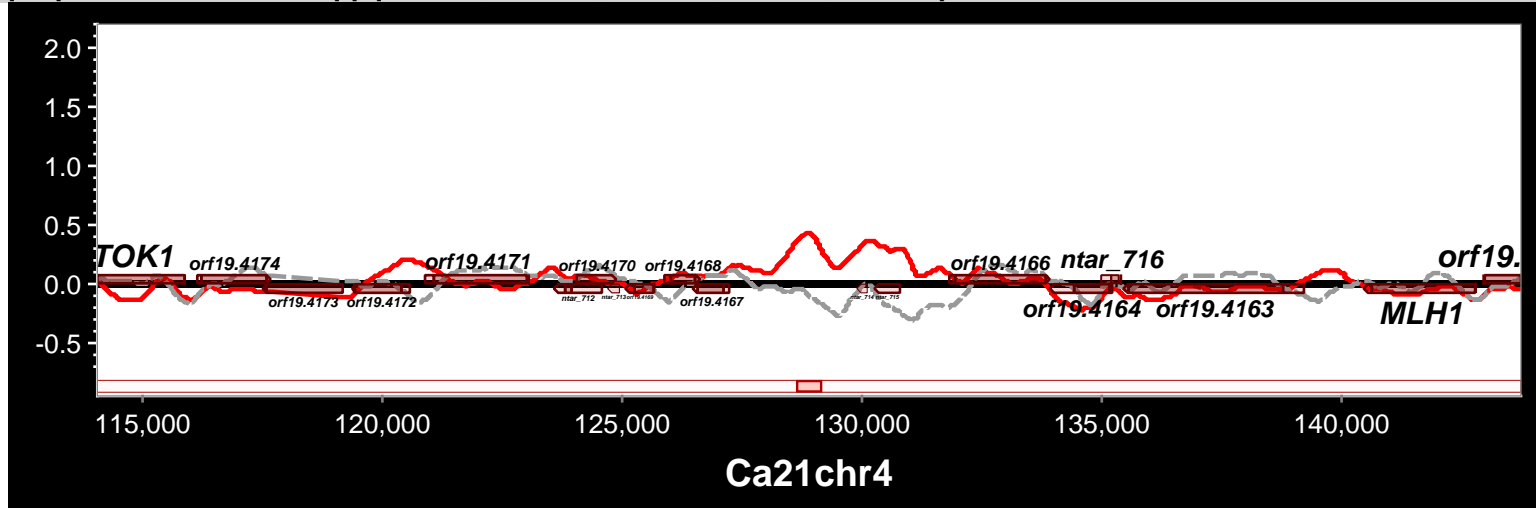

[0.42] Ca21chr7:434857-464540 [+] [CUP9, EXO70, LIG1, HSP90, GRX1]

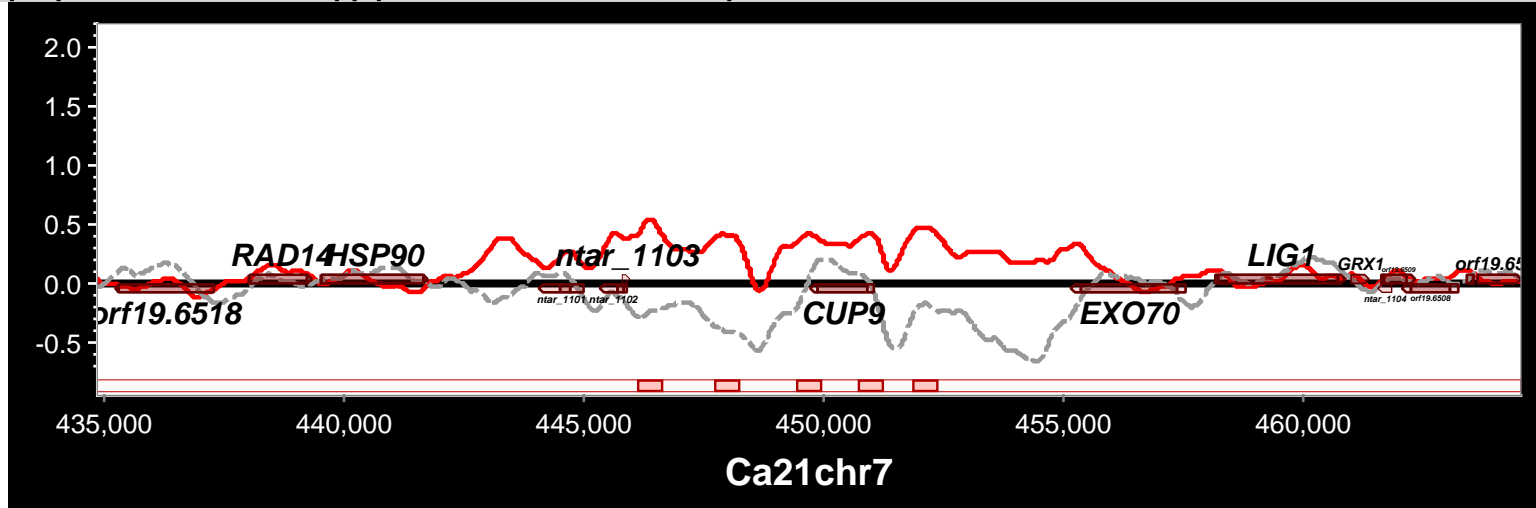



[0.42] Ca21chr7:436144-465827 [-] [CUP9, EXO70, LIG1, GRX1, orf19.6509]

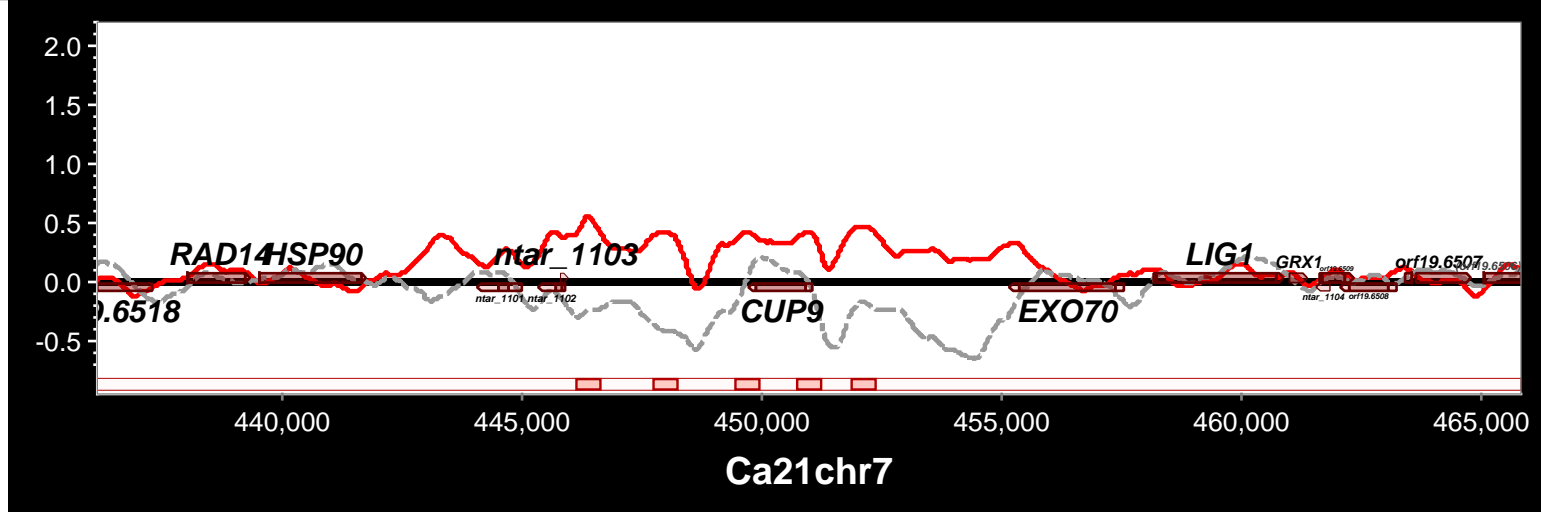

[0.42] Ca21chr7:894625-924308 [+] [orf19.7152, orf19.7153, UTP18, orf19.7151, FAA2-3]

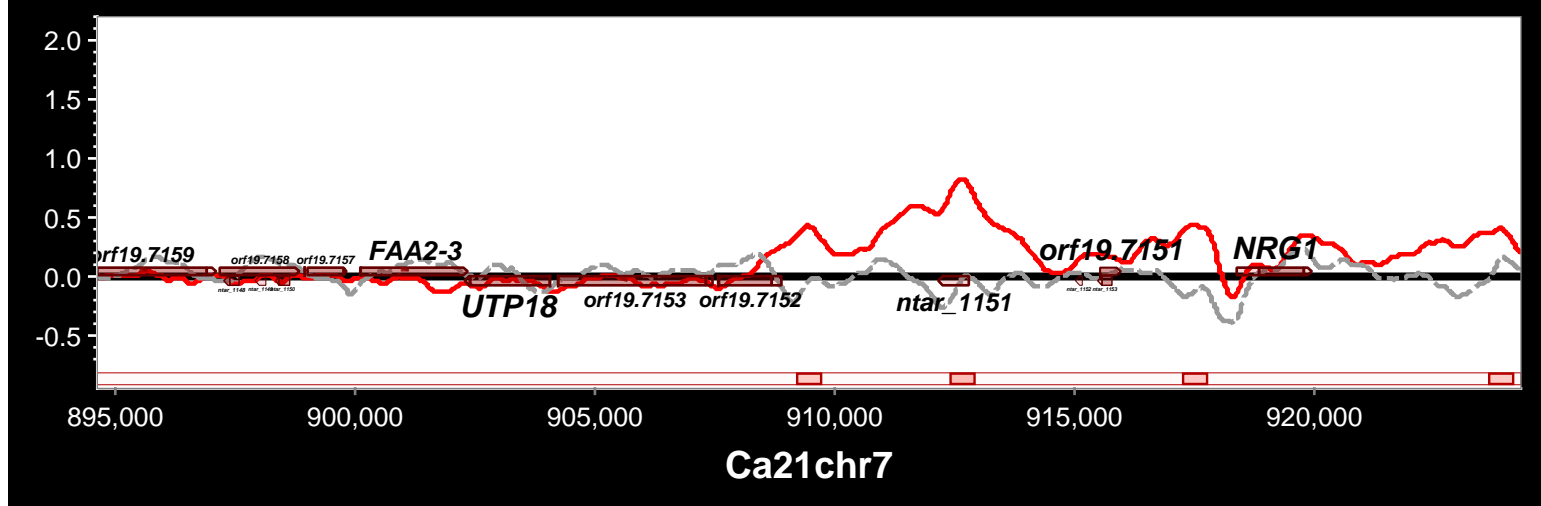

[0.411] Ca21chrR:1985186-2014869 [+] [orf19.7337, BGL22, orf19.7340, orf19.7336, orf19.7341]

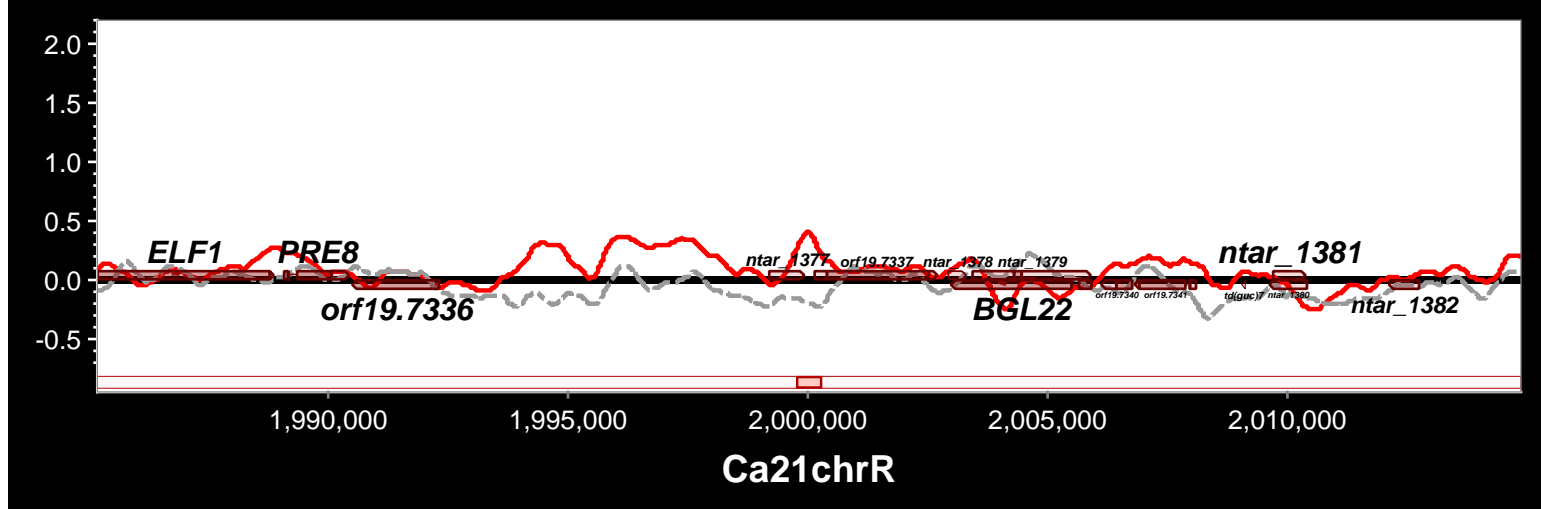

[0.41] Ca21chr1:704366-734049 [-] [tN(GUU)3, orf19.3043, orf19.3042, orf19.3045, orf19.3041]

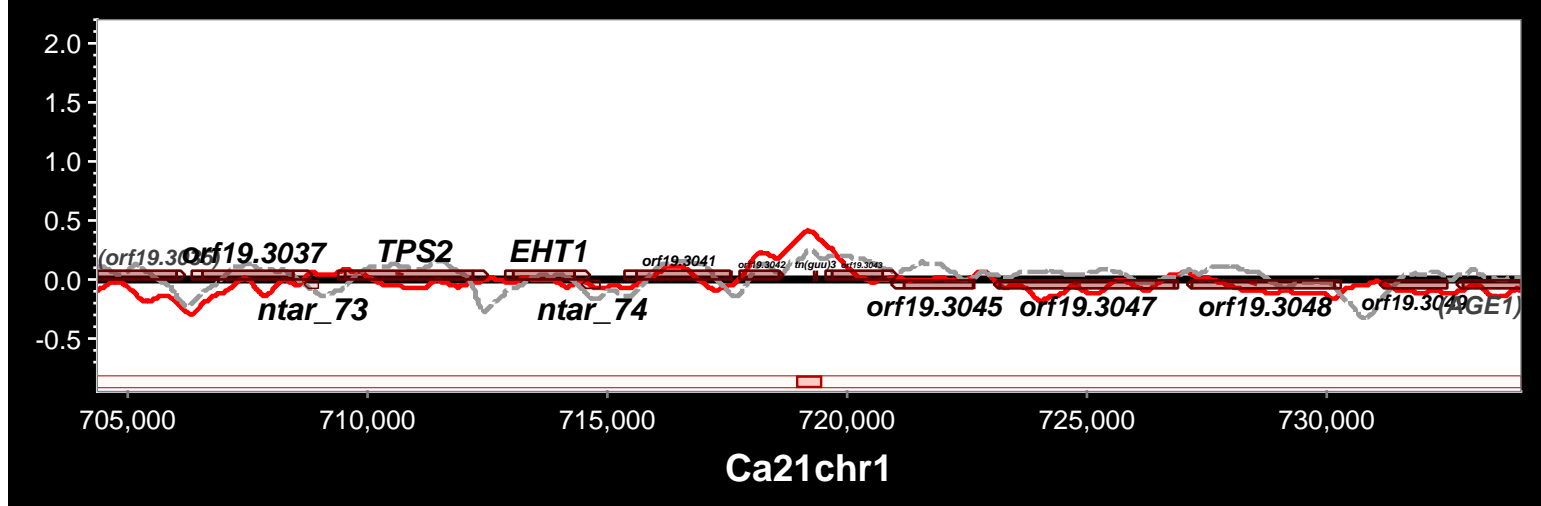

[0.41] Ca21chr1:880799-910482 [+] [GPM2, orf19.1066, RPN4, SSA2, orf19.1070]

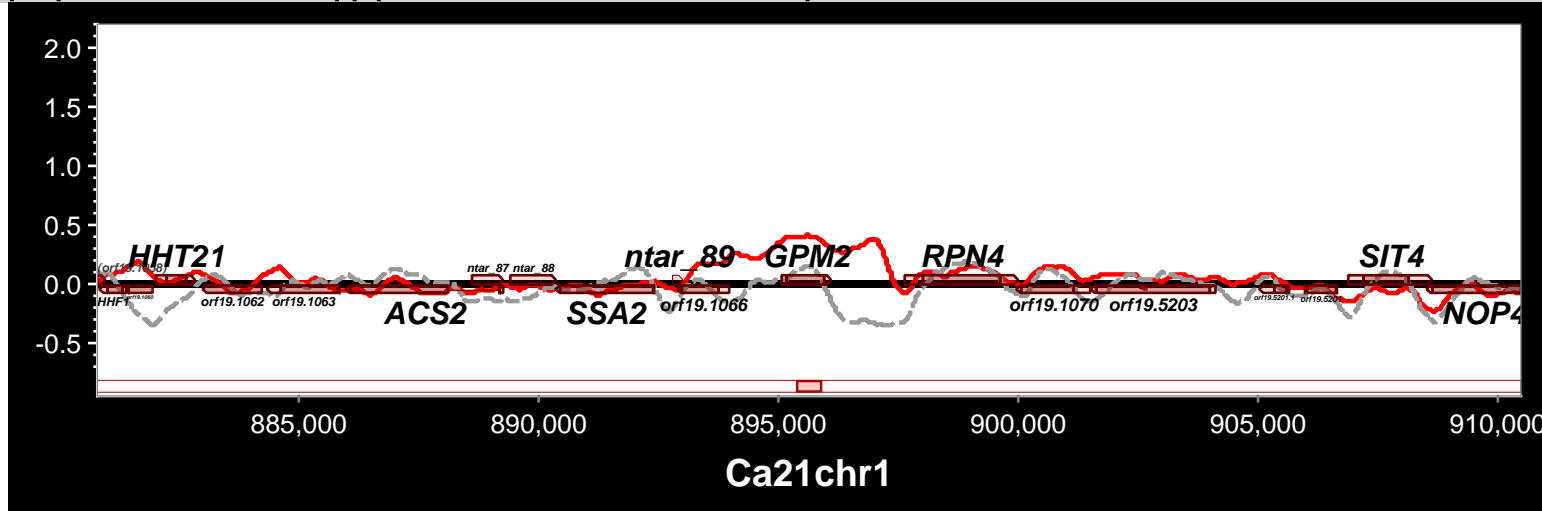

[0.41] Ca21chr2:1324988-1354671 [+] [orf19.35, orf19.34, orf19.35.1, orf19.36, orf19.31]

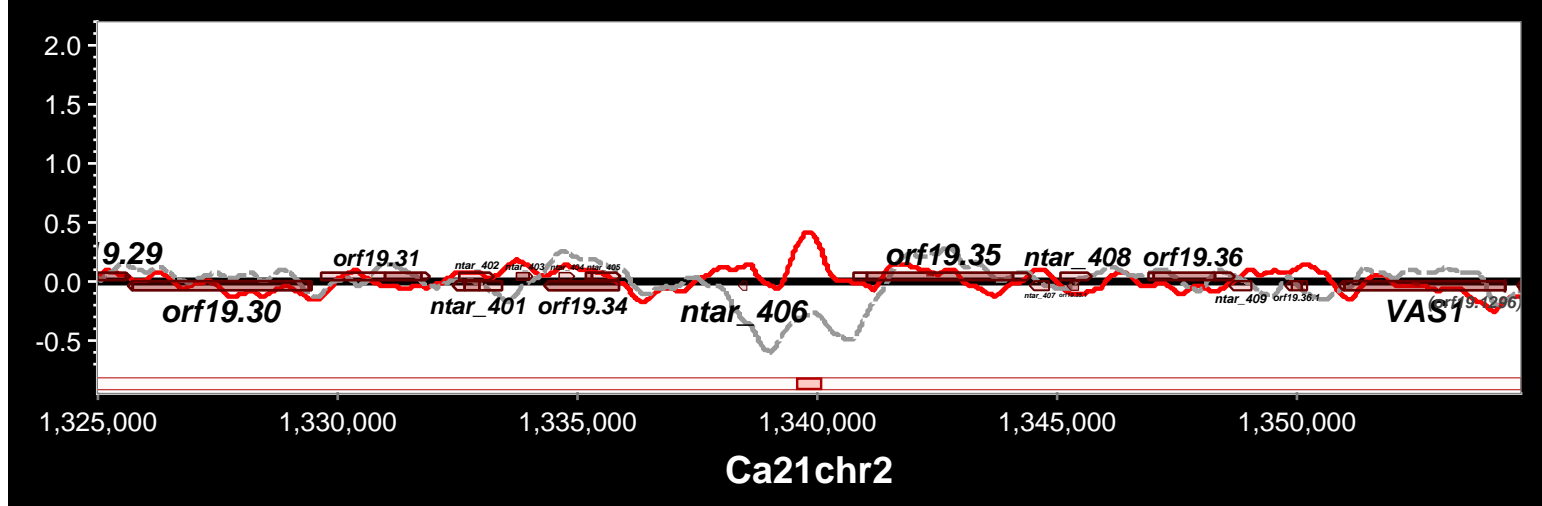

[0.41] Ca21chr7:363692-393375 [+] [orf19.6547, ISU1, LPI9, orf19.6550, orf19.6551]

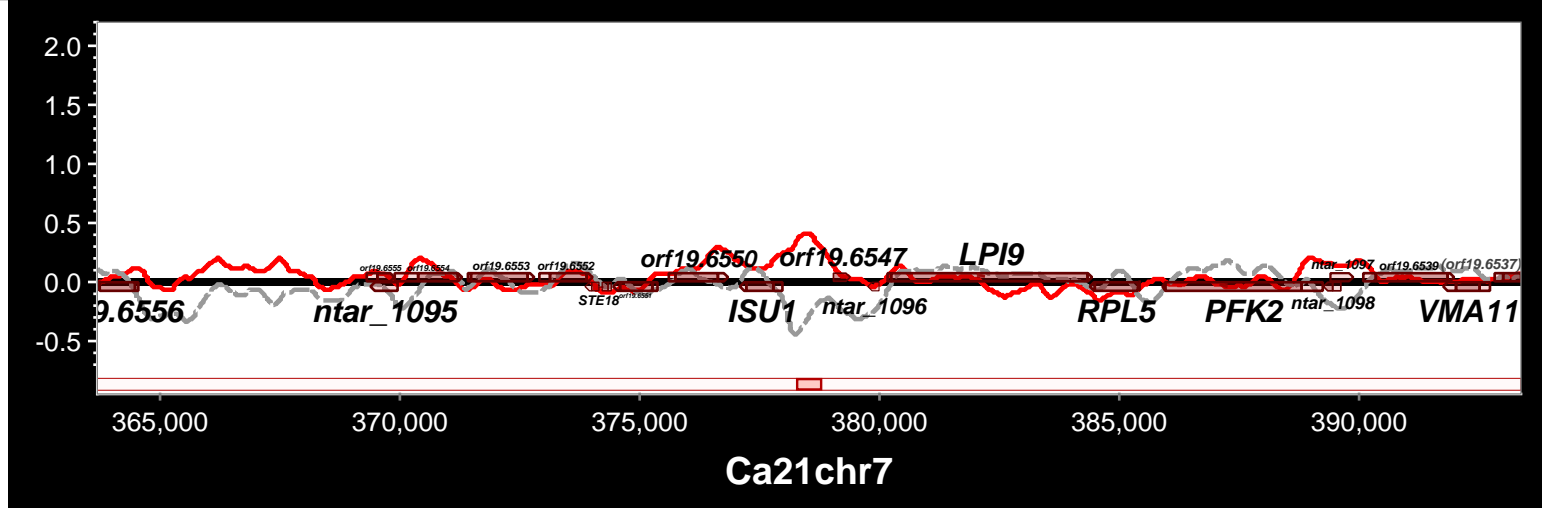

[0.41] Ca21chr7:433149-462832 [+] [CUP9, HSP90, EXO70, RAD14, LIG1]

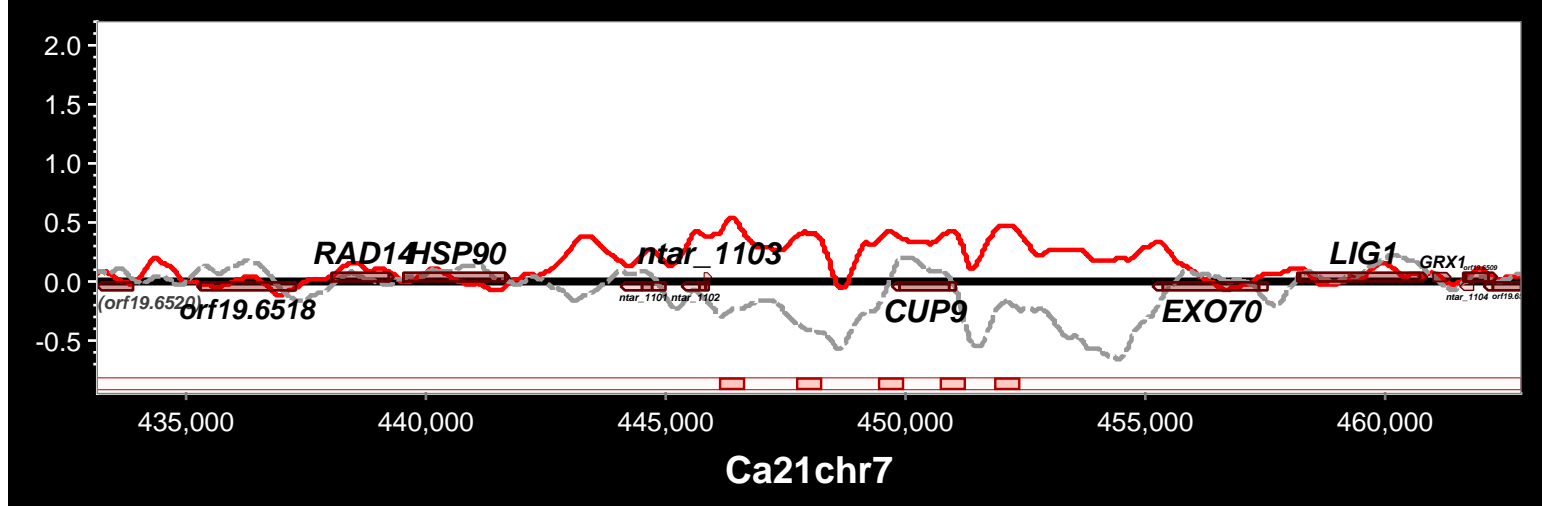

[0.401] Ca21chr2:712717-742400 [+] [orf19.871, orf19.872, orf19.873, COX6, orf19.874]

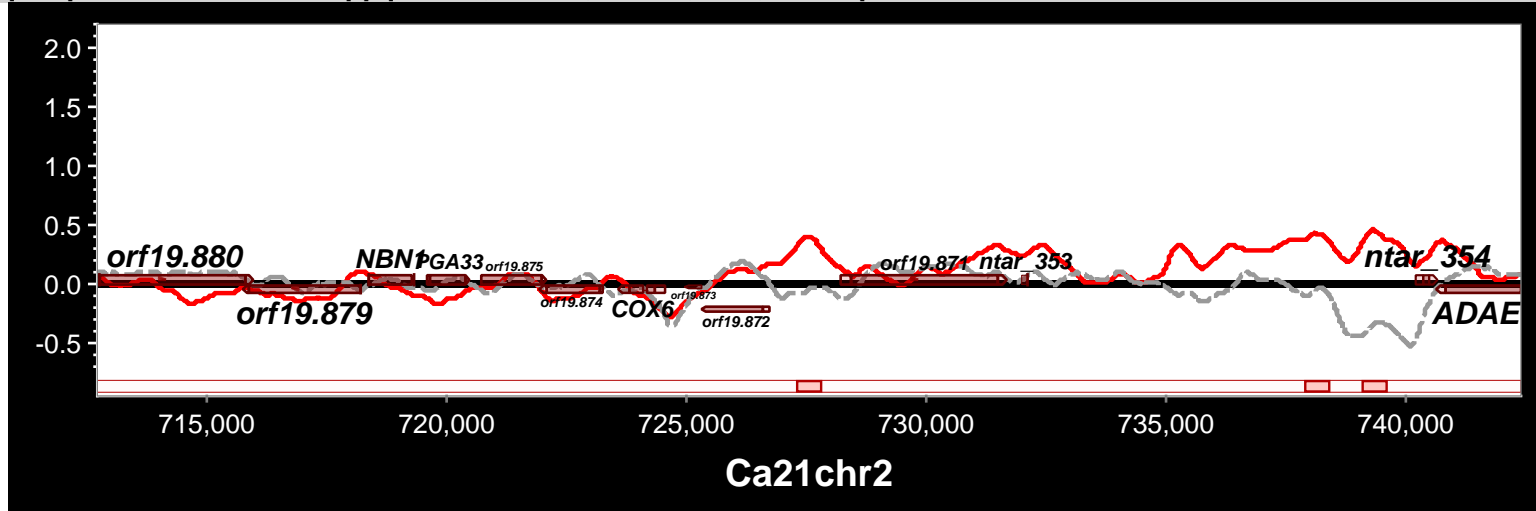

[0.4] Ca21chr2:305578-335261 [+] [orf19.1488, tL(CAA)1, orf19.1486, MSB2, orf19.1485]

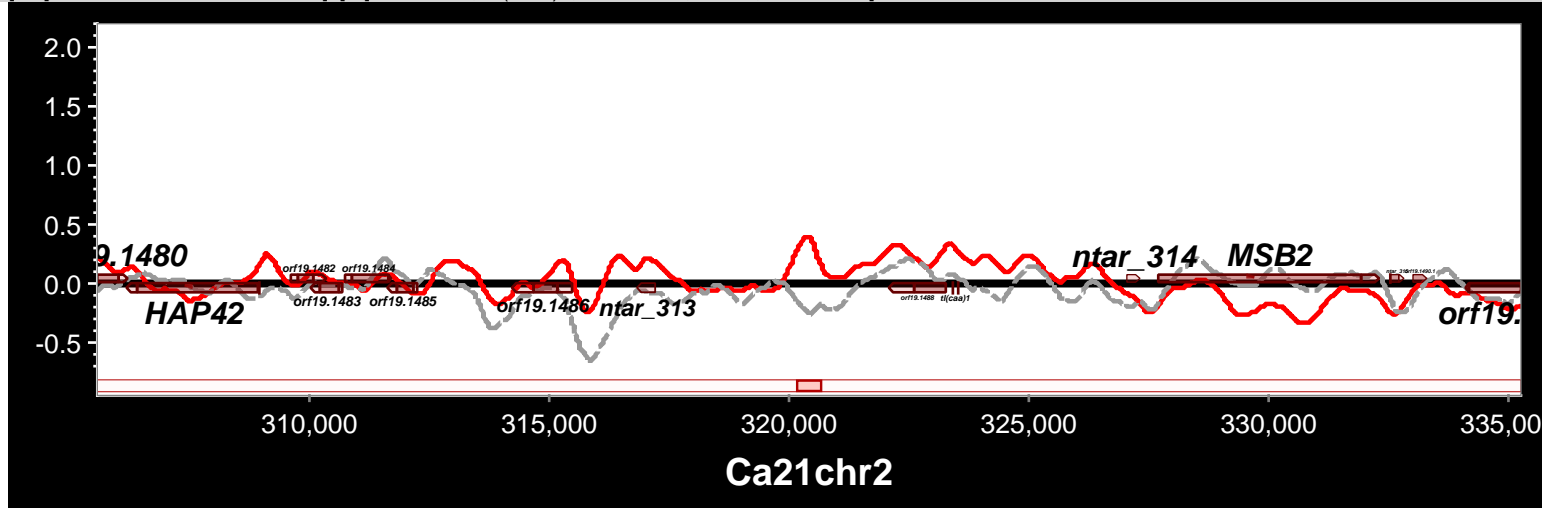

[0.4] Ca21chr2:2008182-2037865 [+] [SMM1, orf19.1363, orf19.1361, orf19.1360.1, orf19.1364]

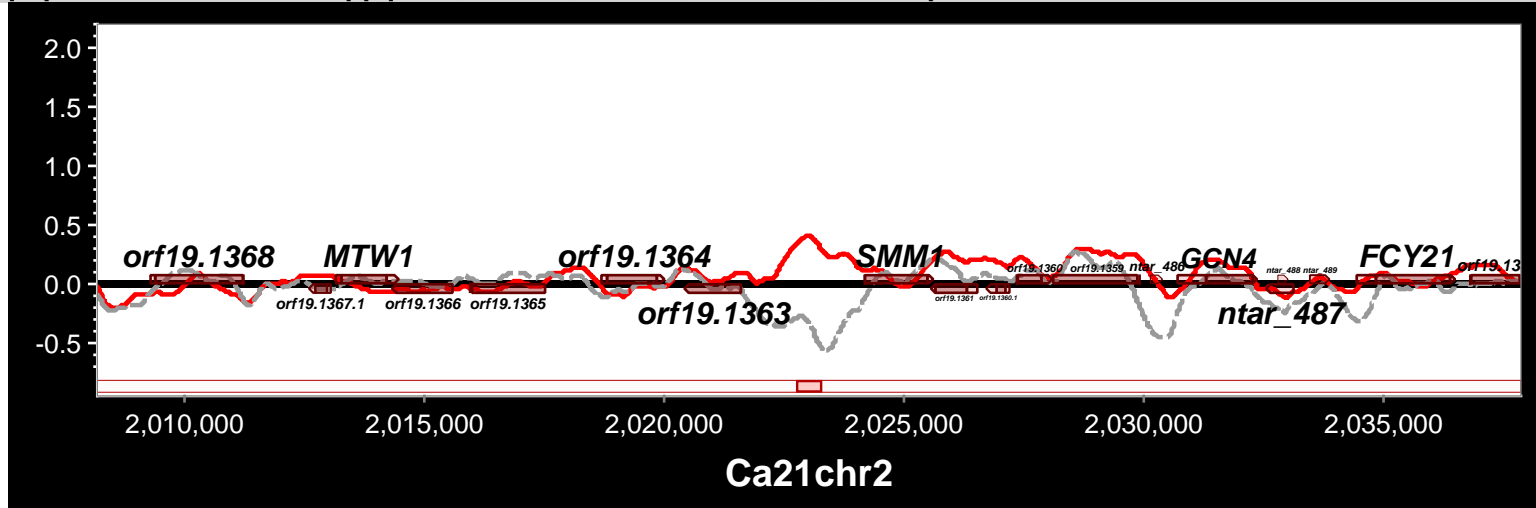

[0.4] Ca21chr2:2059164-2088847 [+] [CYC1, orf19.1769, orf19.1771, orf19.1772, orf19.1768]

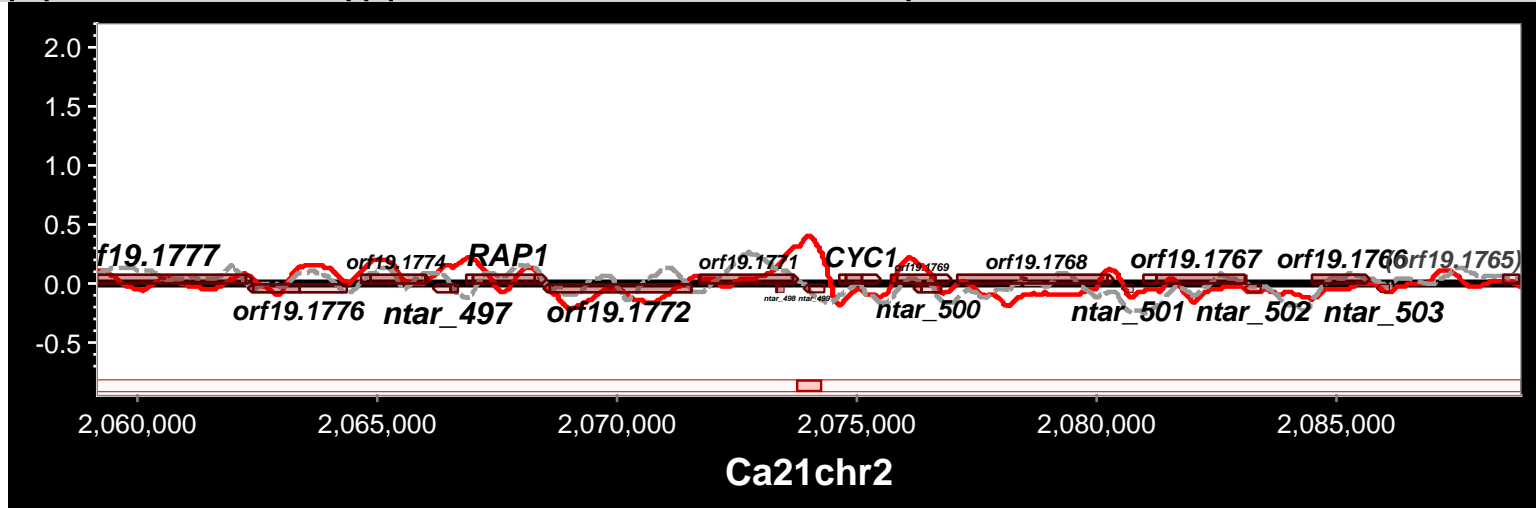

[0.4] Ca21chr3:181136-210819 [+] [tG(UCC)1, orf19.2500, orf19.2499, FLC1, orf19.2498]

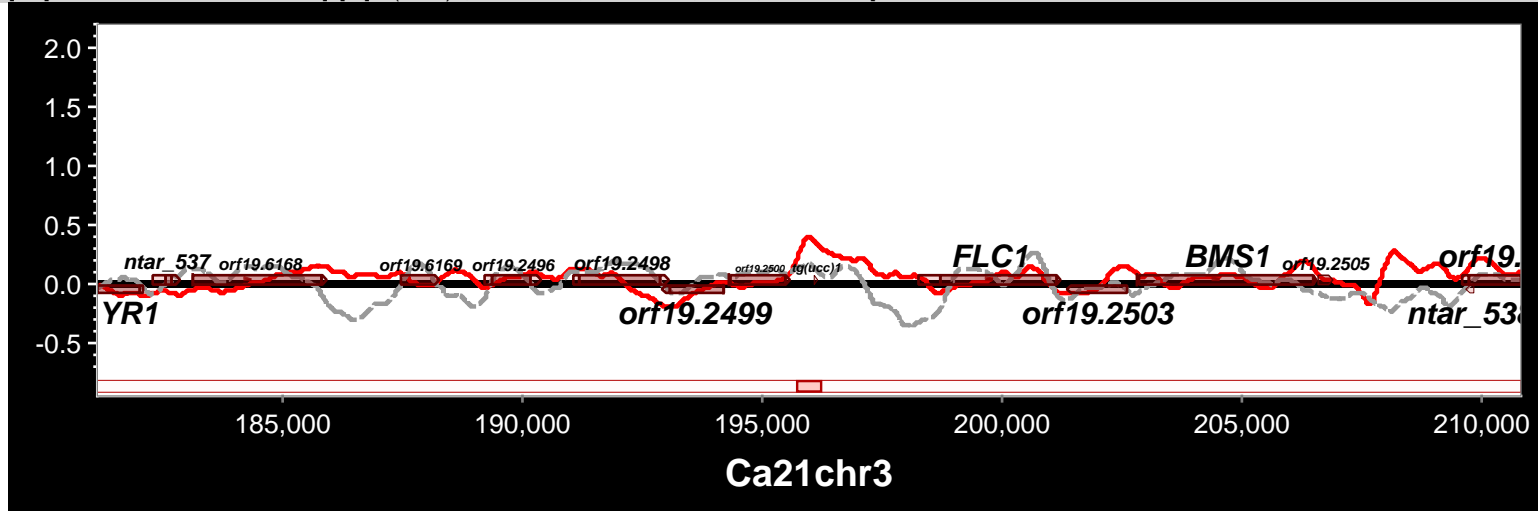

[0.4] Ca21chr3:1204351-1234034 [+] [orf19.6983, orf19.6984, orf19.6982, TEA1, orf19.6981]

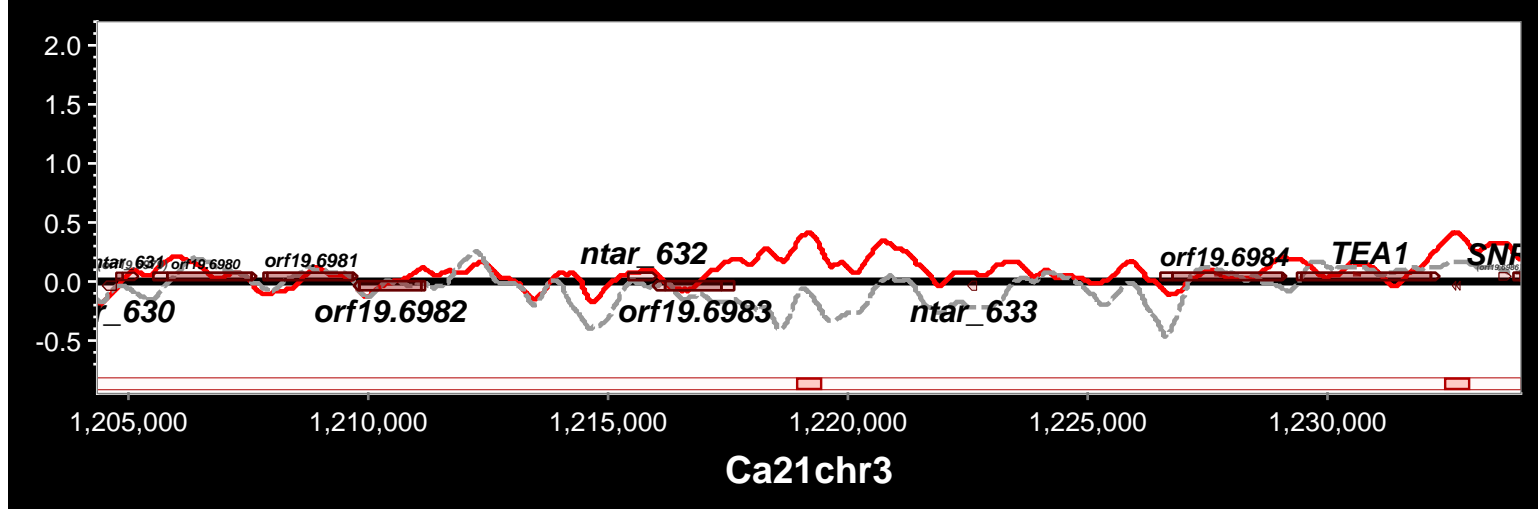

[0.4] Ca21chr3:1217862-1247545 [+] [tV(AAC)5, tV(AAC)6, SNR6, orf19.6986, TEA1]

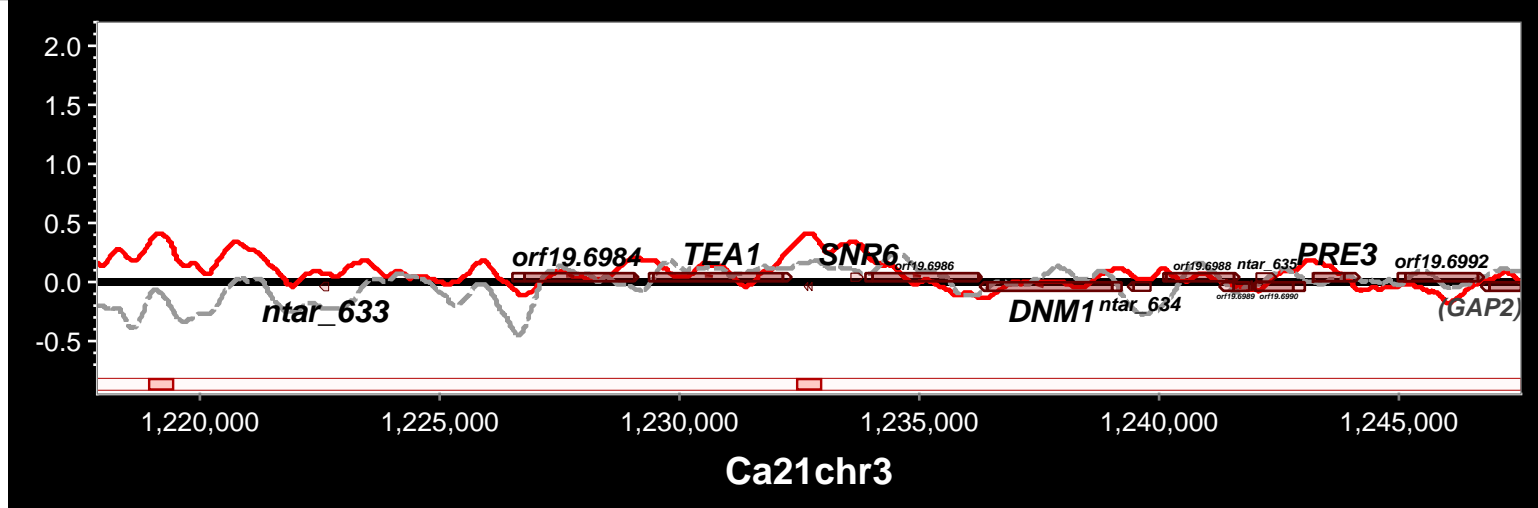

[0.4] Ca21chr3:1707100-1736783 [+] [orf19.6736, orf19.6737, tF(GAA)5, tR(UCU)5, SNR52]

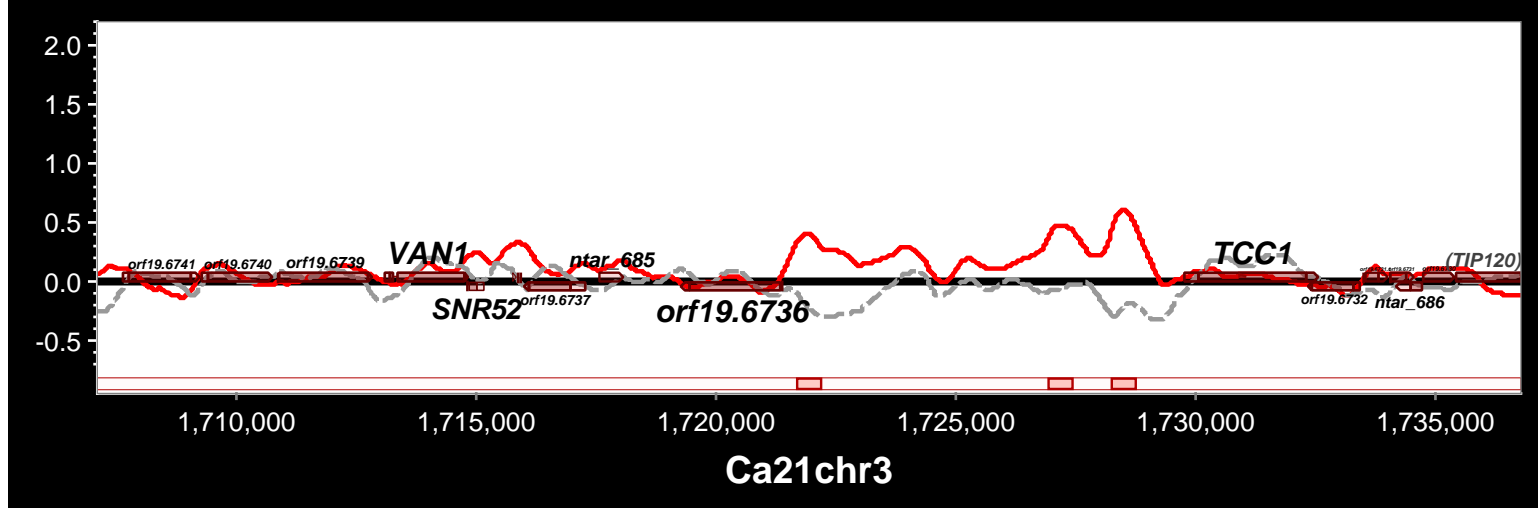

[0.4] Ca21chr7:909054-938737 [+] [orf19.7149, TPO2, NRG1, orf19.7144, orf19.7151]

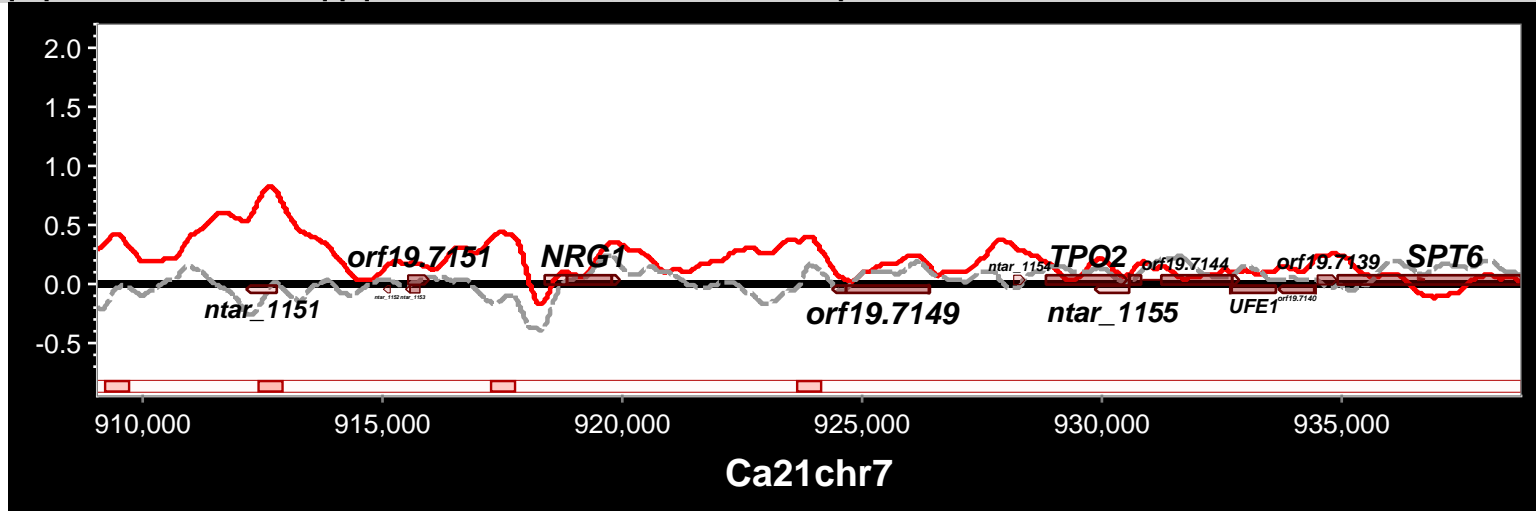

[0.4] Ca21chrR:1301203-1330886 [+] [orf19.3868, orf19.3869, ADE13, orf19.3871, orf19.3872]

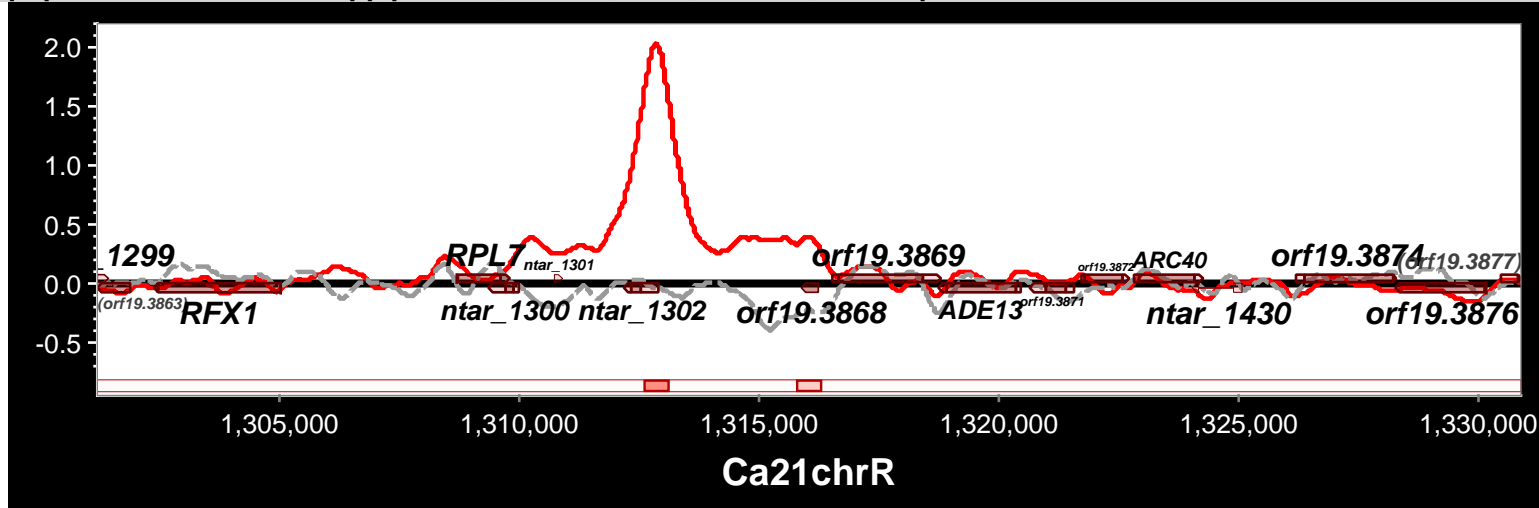

[0.4] Ca21chrR:1375926-1405609 [+] [orf19.715, orf19.716, orf19.714, orf19.713, HSP60]

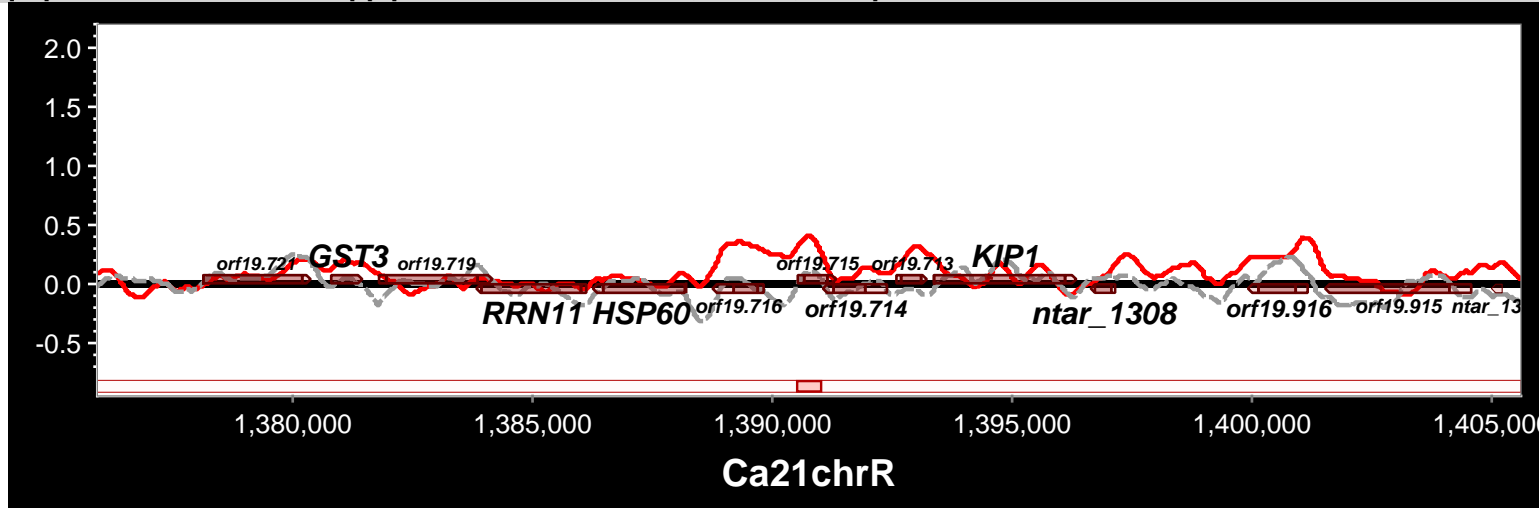

[0.4] Ca21chrR:1674675-1704358 [+] [YHB1, SAP2, orf19.3706, PTC6, orf19.3704.1]

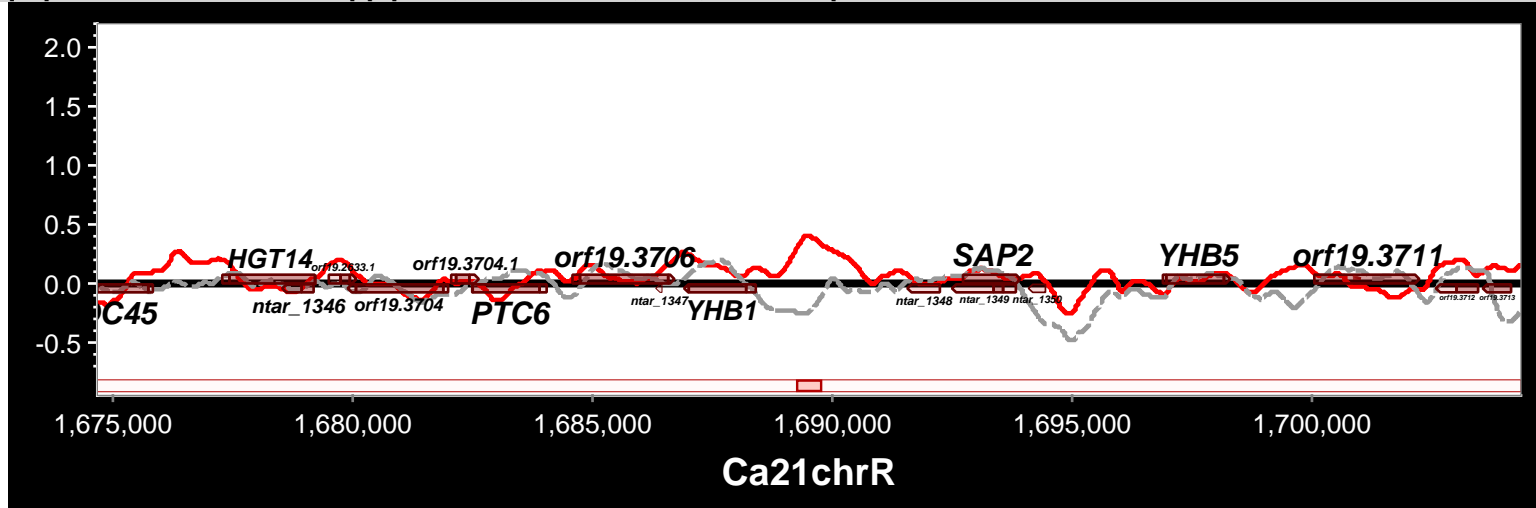

## **Chromatin immunoprecipitation (ChIP) mapping of genomic Brg1 binding sites**

Brg1 Myc-tagged strain CJN1734 vs. untagged wild-type strain SN250 immunoprecipitation binding data were performed under biofilm conditions. The X-axis represents ORF chromosomal locations. The Y-axis is the Agilent normalized enrichment value (log<sub>2</sub>) post-smoothing for the binding of Brg1. Brg1-Myc strain (green line) and untagged wild-type strain (grey dashed line) ChIP-chip array binding data was mapped and plotted onto the chromosomes containing the ORFs shown using MochiView v.1.45 software. All significant called peaks for Brg1 are indicated by the green track under the peak (see Supplemental Dataset 2 for exact locations and enrichment values). Peak-finding significance thresholds of  $P \leq 0.001$  were used followed by a user-defined cut-off for the minimum value for peak inclusion post-smoothing set to 0.48 (see MochiView manual for details). Genes plotted above the bold line read in the sense direction; genes plotted below the bold line read in the antisense direction.

[2.932] Ca21chr1:1076561-1106244 [+] [orf19.449, orf19.448, orf19.450, orf19.446.2, orf19.446.1]

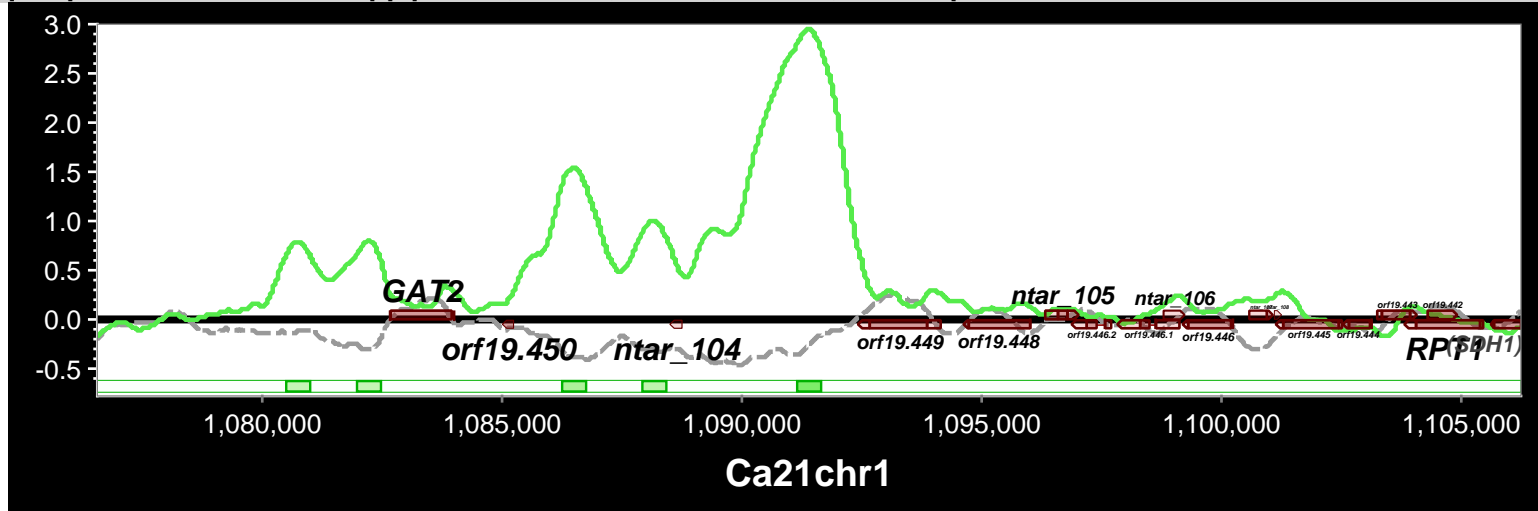

[2.74] Ca21chrR:1360395-1390078 [+] [orf19.721, BCR1, GST3, orf19.719, orf19.725]

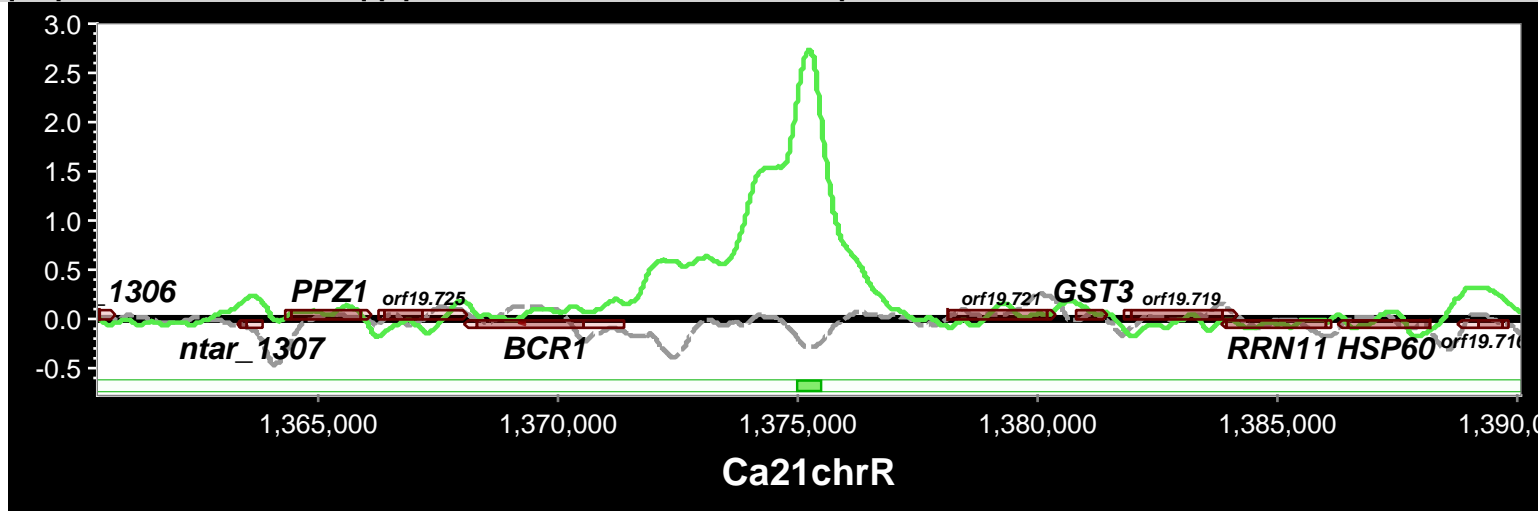

[2.479] Ca21chr3:1628295-1657978 [+] [orf19.6783, BMT1, PGA32, RPS12, orf19.6786]

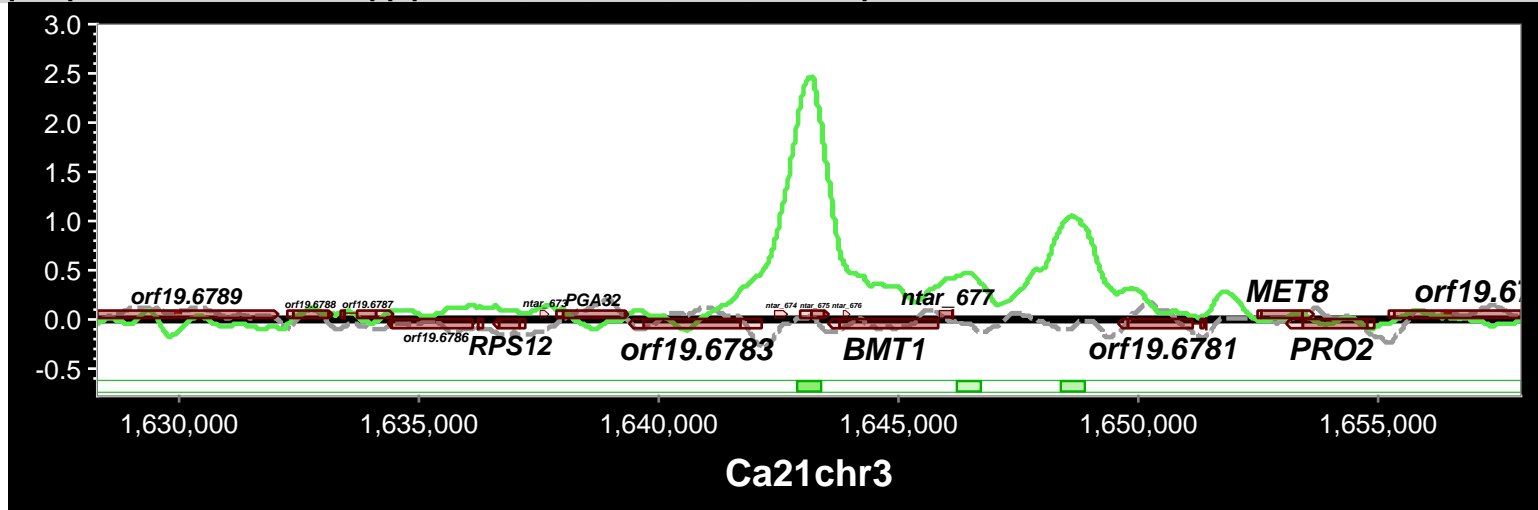

[2.238] Ca21chrR:1981639-2011322 [+] [orf19.7337, orf19.7336, PRE8, BGL22, orf19.7340]

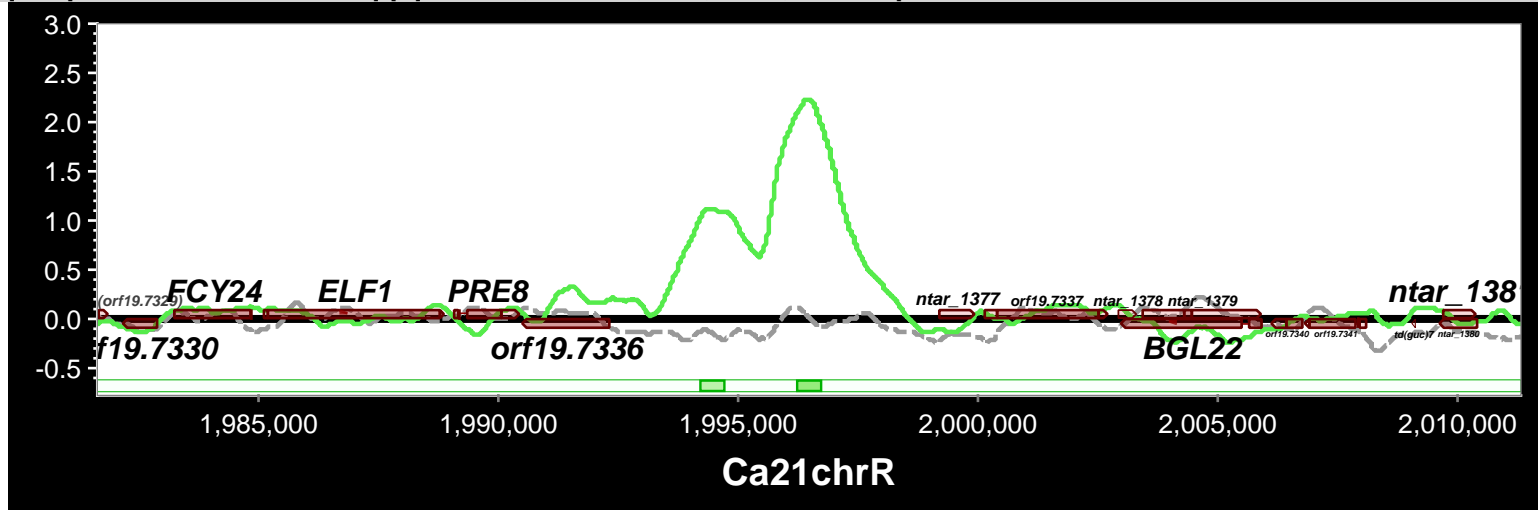

[2.126] Ca21chr3:1713585-1743268 [+] [TCC1, orf19.6732, orf19.6731.1, orf19.6731, orf19.6730]

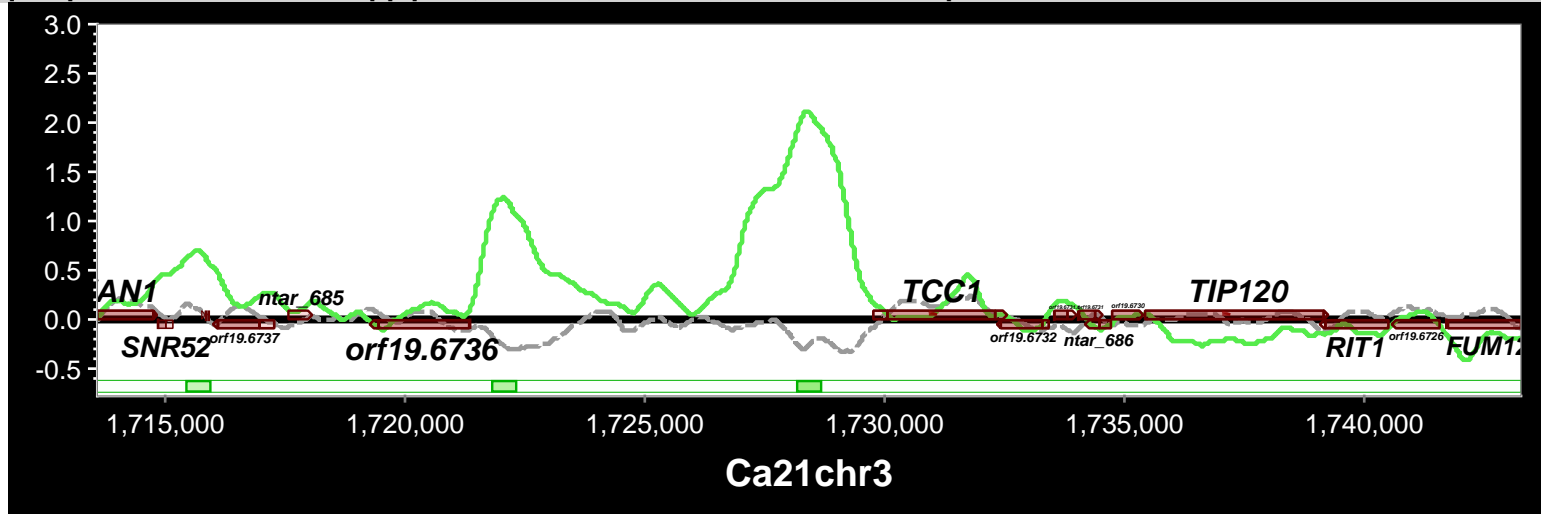

[2.072] Ca21chr7:430847-460530 [+] [CUP9, HSP90, RAD14, orf19.6518, EXO70]

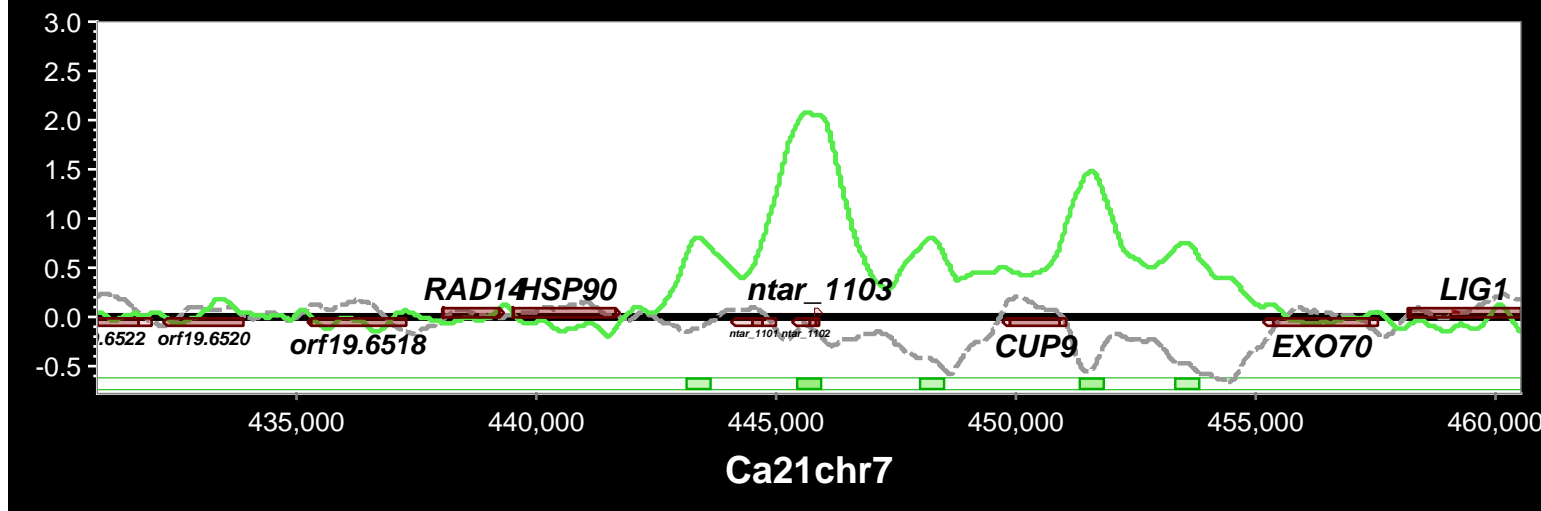

[2.032] Ca21chr5:881937-911620 [+] [orf19.1286, orf19.1285, orf19.1287, FGR42, MEC1]

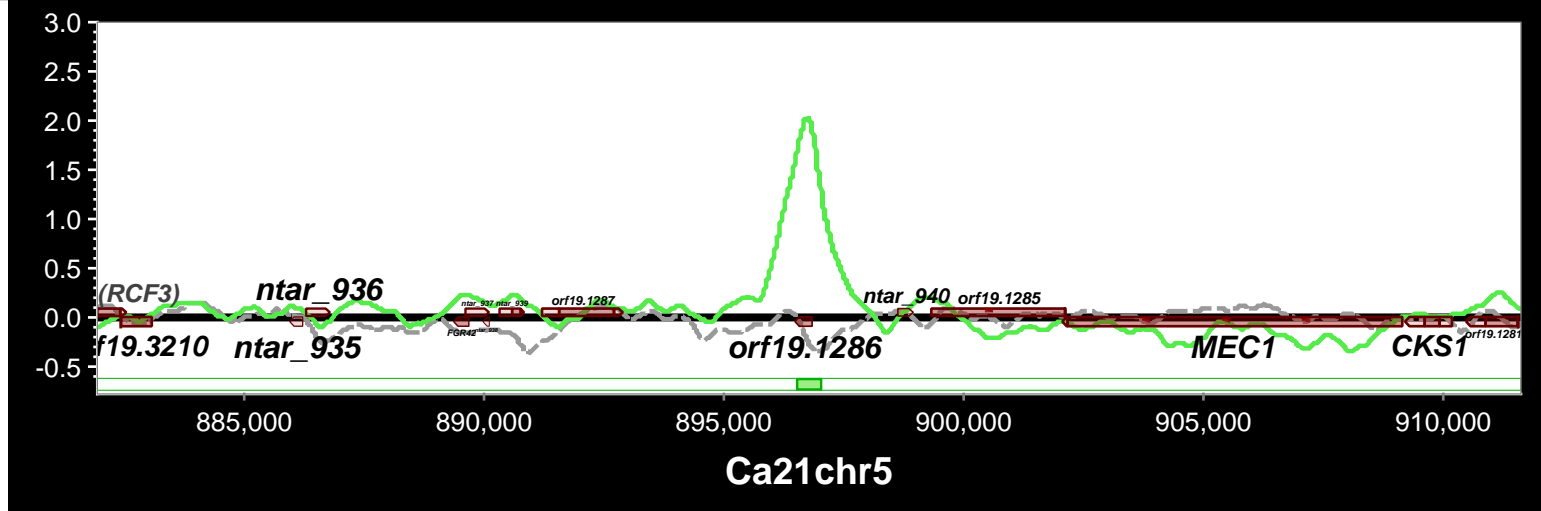

[2.027] Ca21chrR:64672-94355 [+] [orf19.7502, orf19.7501, CDA2, PXA1, orf19.7504]

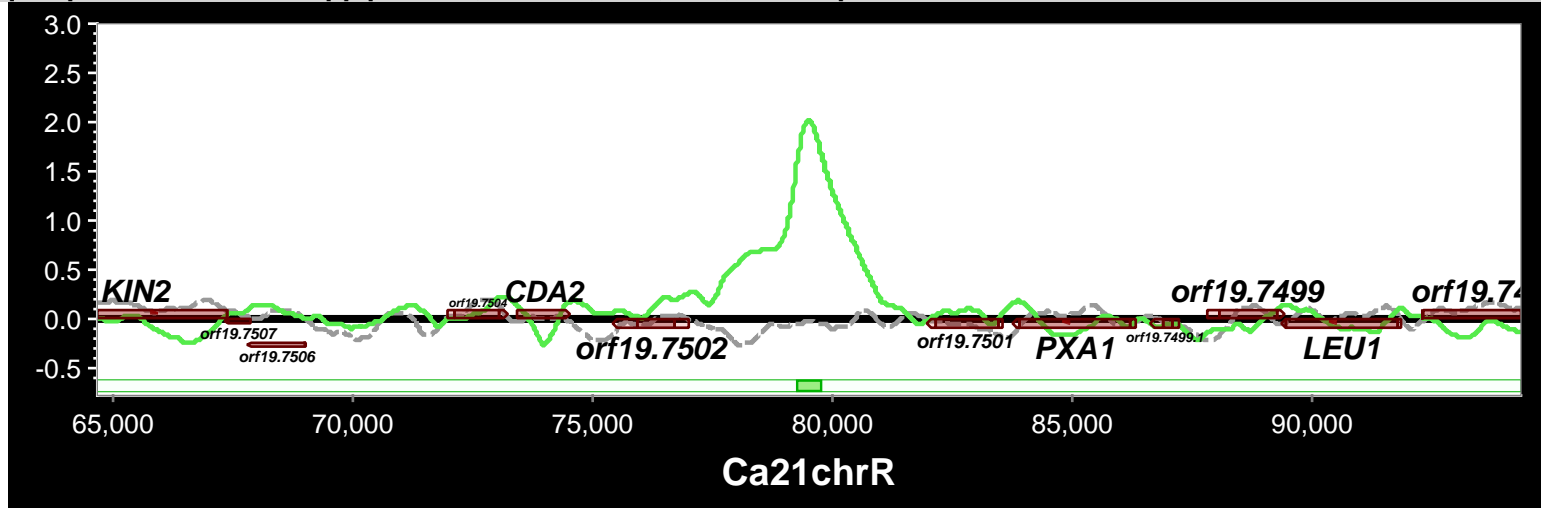



[2.003] Ca21chrR:575228-604911 [+] [orf19.2822, orf19.2821, orf19.2820, orf19.2819, orf19.2818]

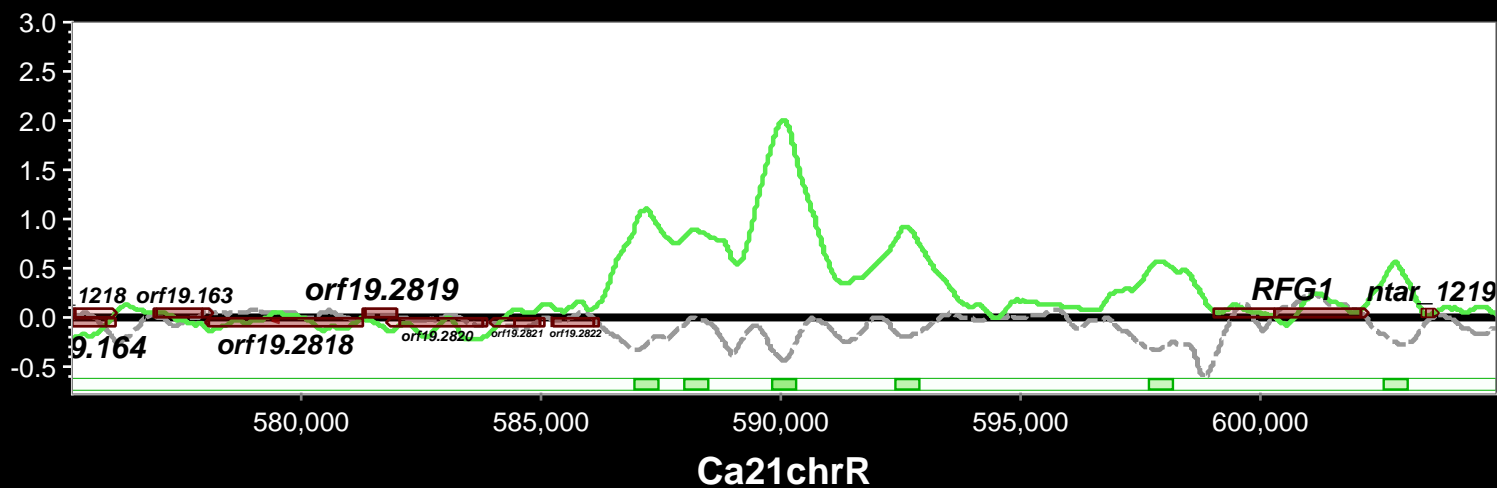

[1.988] Ca21chr4:860970-890653 [+] [PGA31, orf19.5300, ECM1, PGA30, orf19.5304]

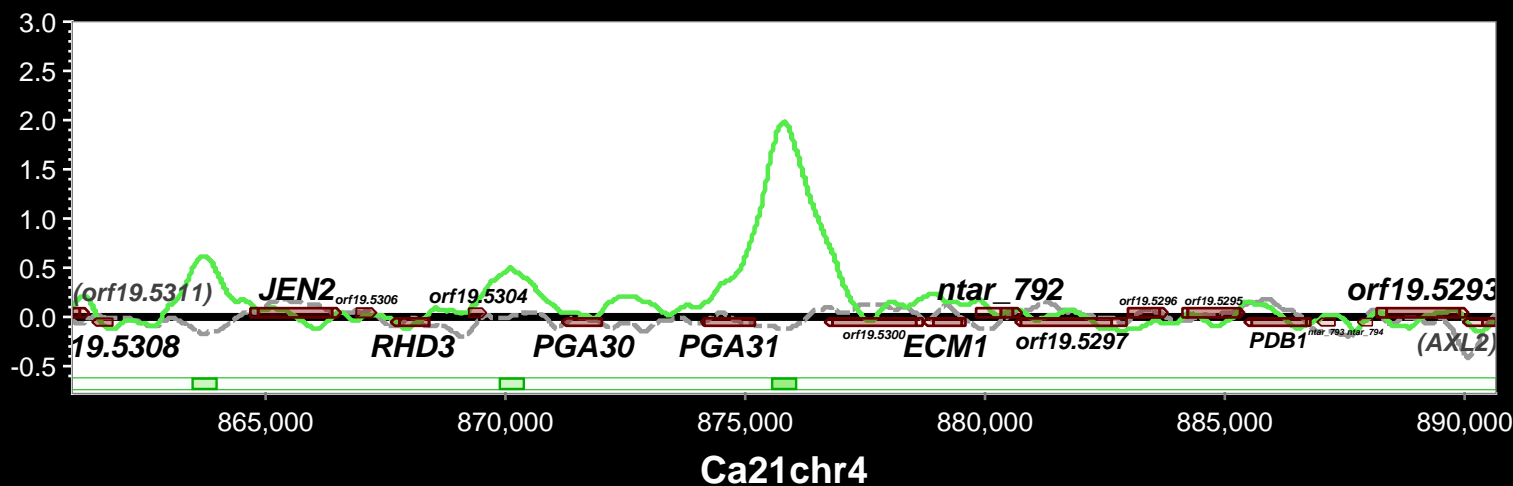

[1.974] Ca21chr3:1575079-1604762 [+] [orf19.6805, orf19.6807, tY(GUA)3, orf19.6809, orf19.6804]

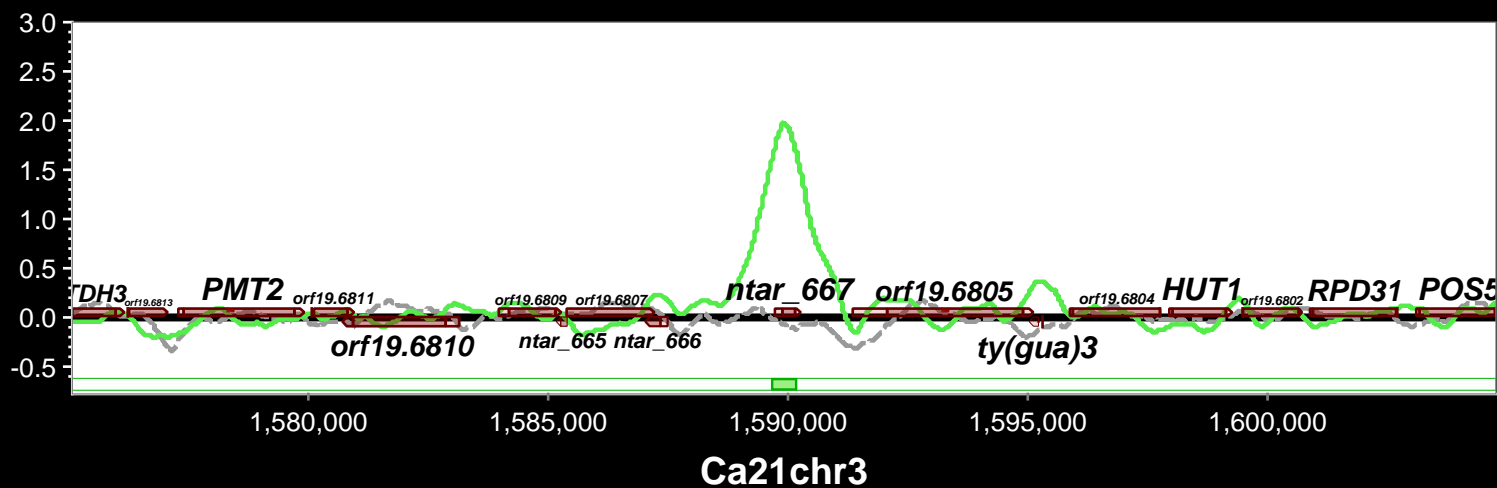

[1.878] Ca21chr1:1032231-1061914 [+] [RHD1, orf19.53, orf19.52, orf19.55, ARG2]

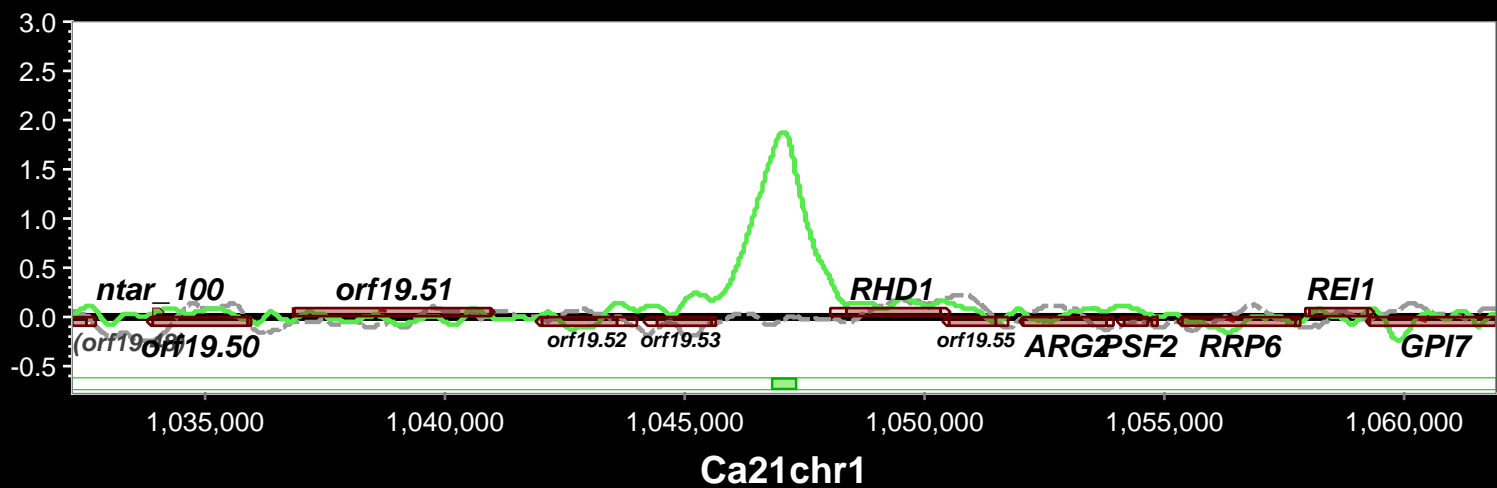

[1.85] Ca21chr7:908183-937866 [+] [orf19.7149, NRG1, TPO2, orf19.7151, orf19.7144]

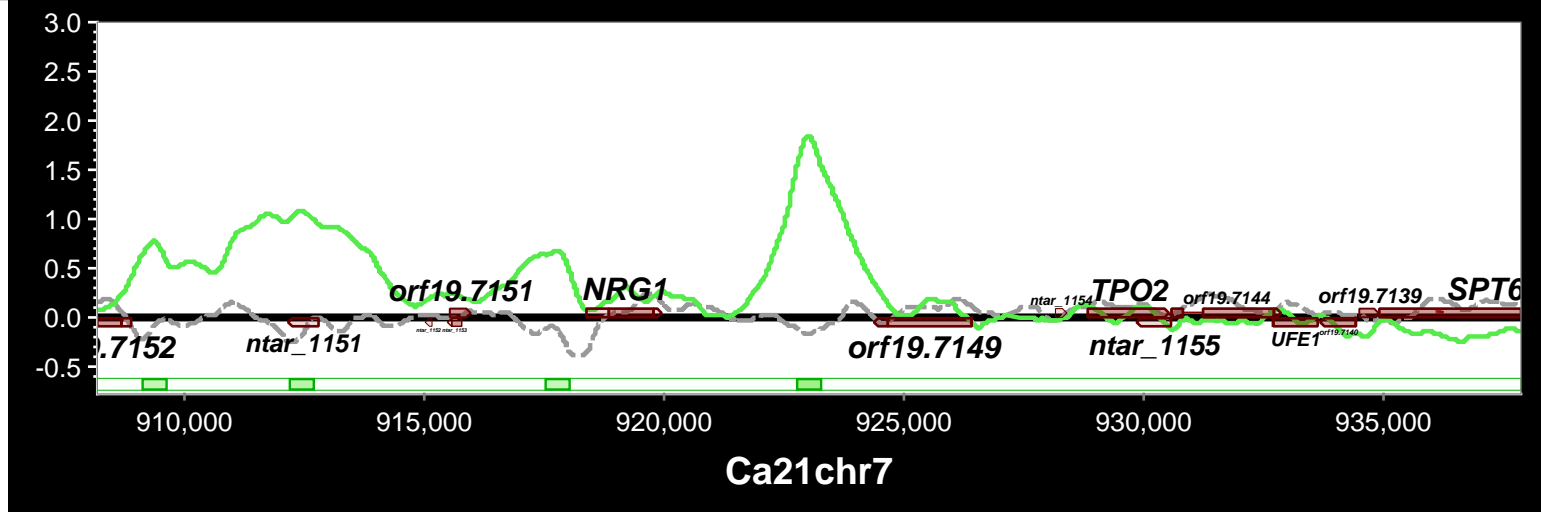

[1.822] Ca21chrR:1514437-1544120 [+] [CRZ2, ALS3, URA2, orf19.1815, orf19.1814]

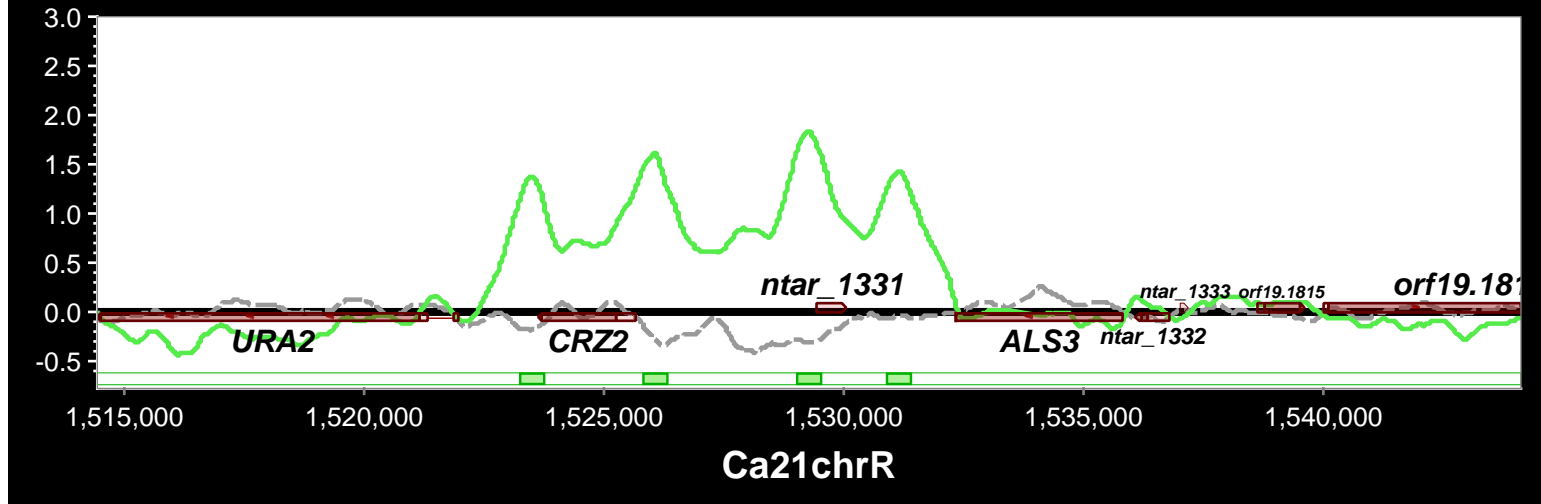

[1.821] Ca21chrR:1251269-1280952 [+] [SFL1, SOK1, orf19.3848, orf19.457, orf19.458]

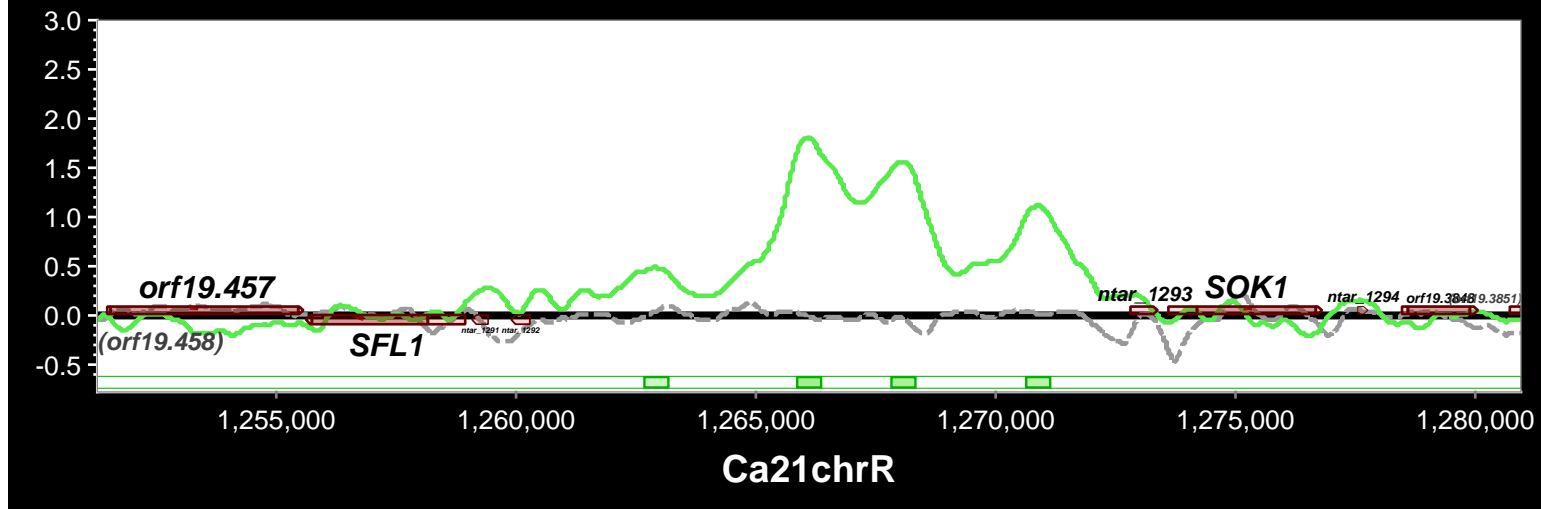

[1.775] Ca21chr3:1399483-1429166 [+] [ALS6, MMS21, MUB1, OAC1, orf19.7410]

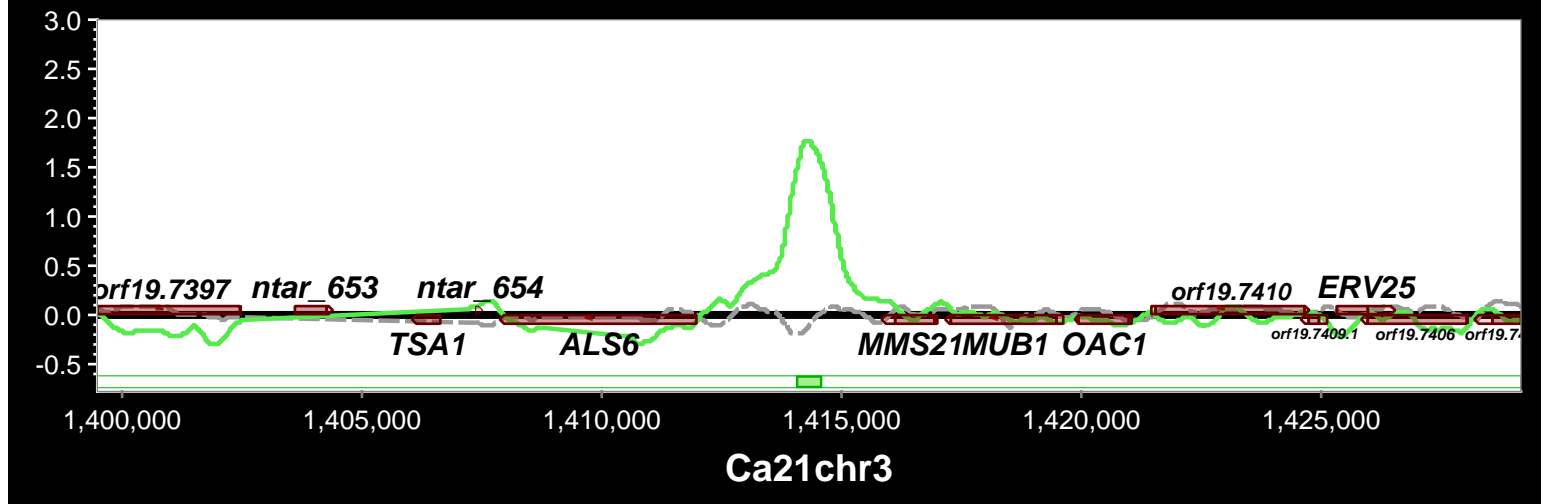

[1.766] Ca21chrR:2154293-2183976 [+] [orf19.7590, FAA4, orf19.7589, orf19.7588, orf19.7593]

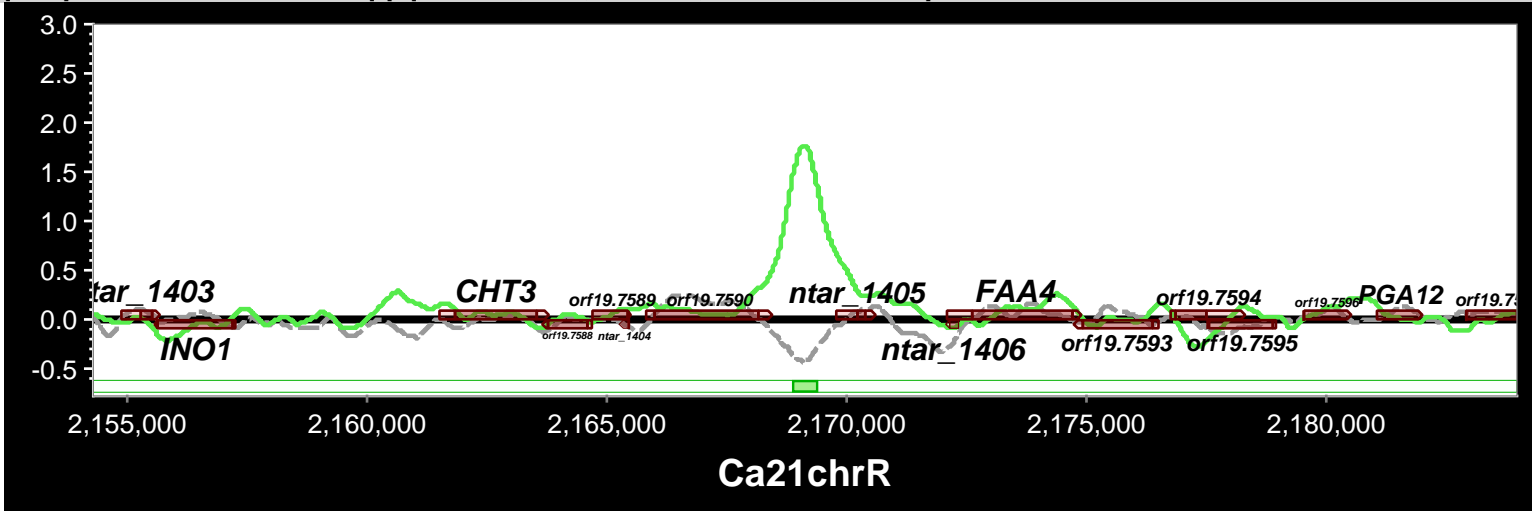

[1.745] Ca21chr1:1314804-1344487 [+] [orf19.1821, orf19.177, orf19.6280, UME6]

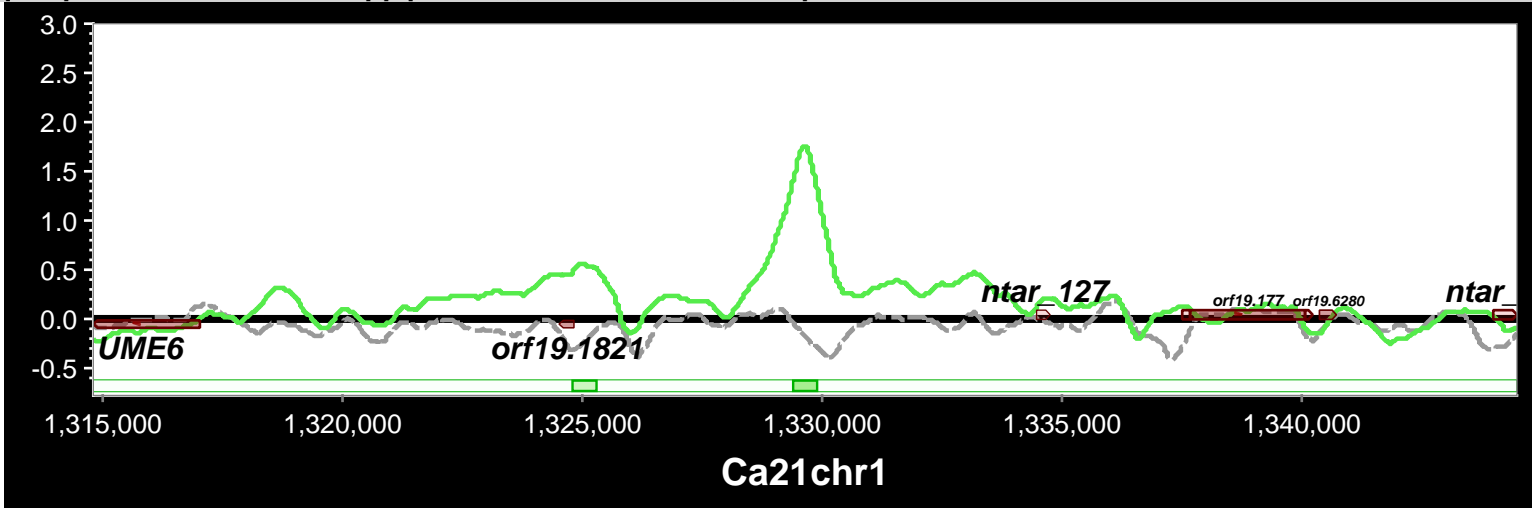

[1.703] Ca21chr3:1103001-1132684 [+] [WOR2, RHB1, orf19.5991, MCA1, RPS19A]

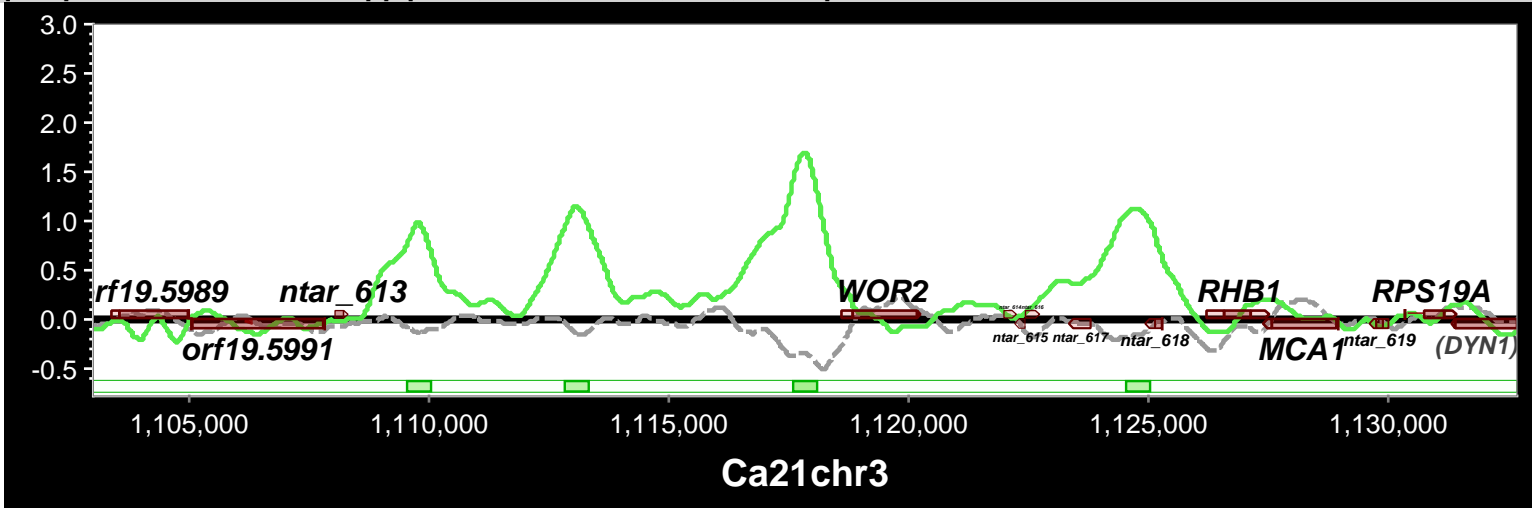

[1.614] Ca21chrR:1511232-1540915 [+] [CRZ2, URA2, ALS3, orf19.1815, SPT10]

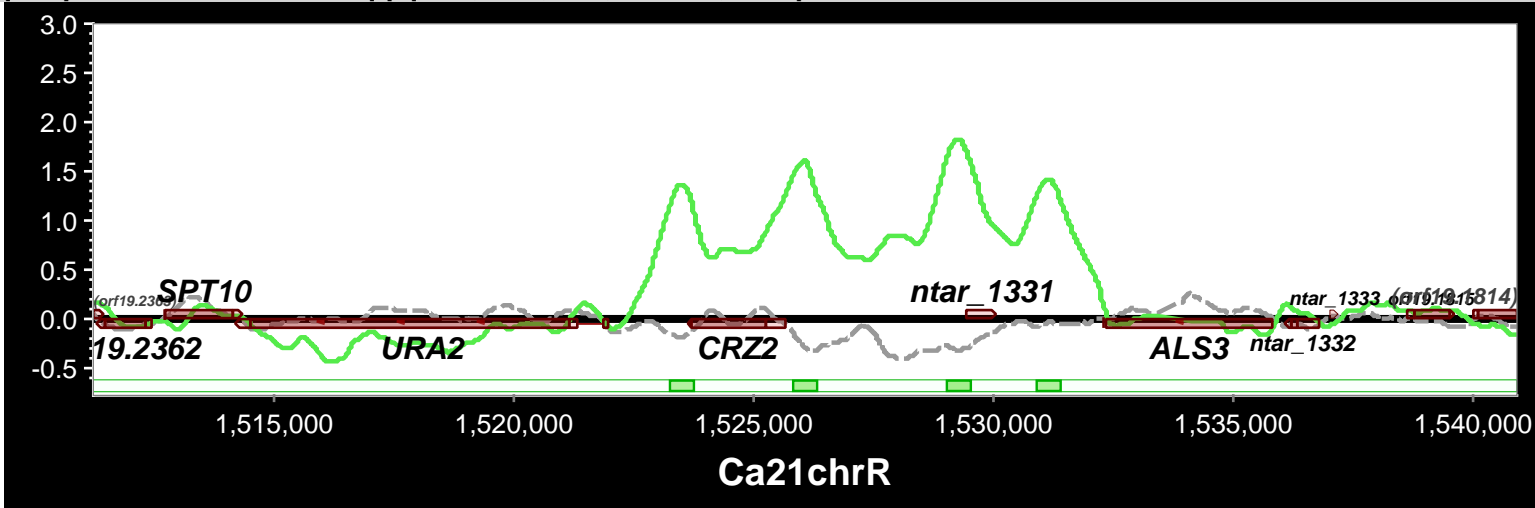

[1.58] Ca21chr3:1342236-1371919 [+] [orf19.7380, orf19.7381, FAA2, CAM1, MNN9]

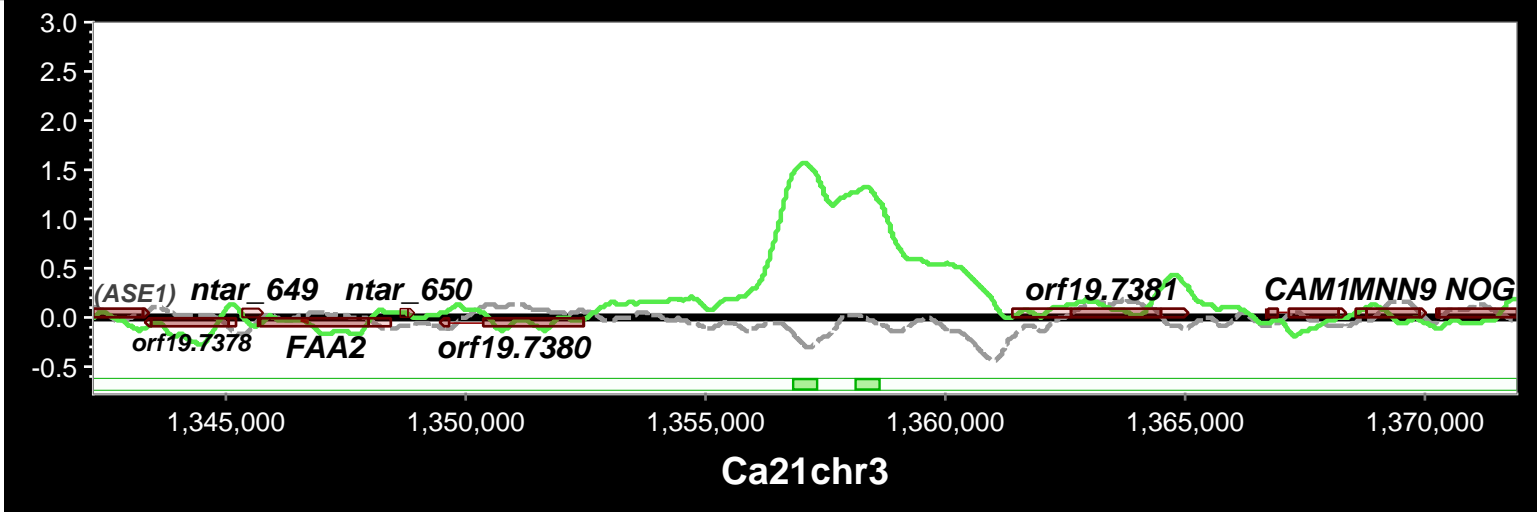

[1.557] Ca21chrR:1253235-1282918 [+] [SOK1, SFL1, orf19.3848, orf19.3851, orf19.457]

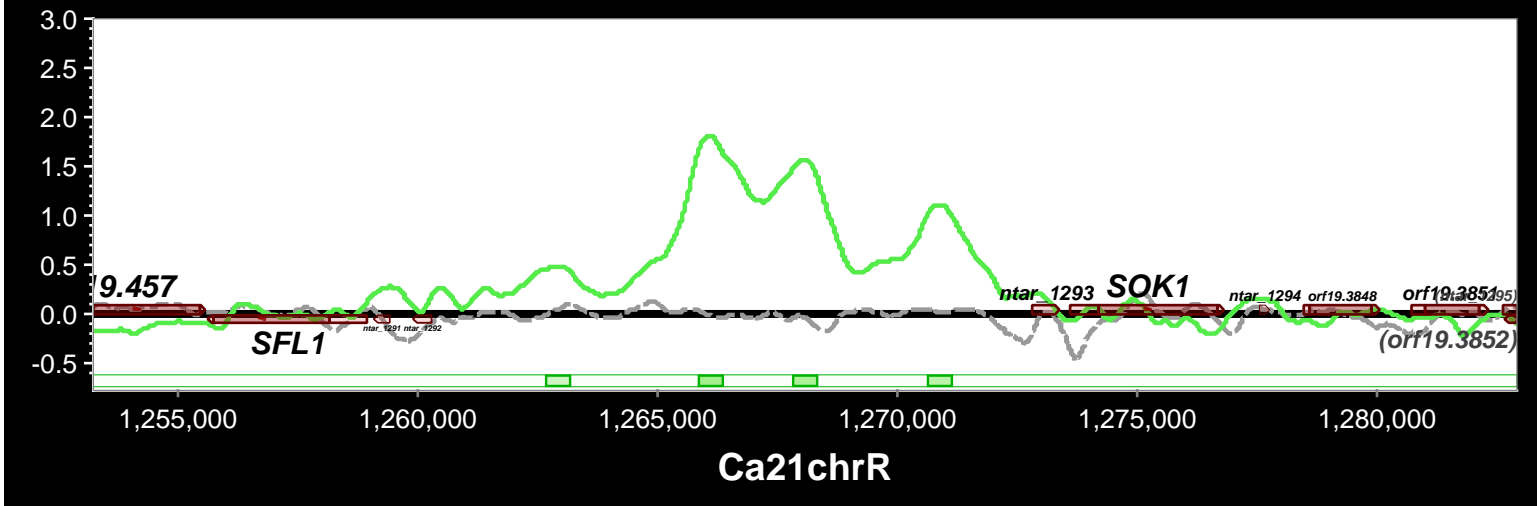

[1.525] Ca21chr1:1071661-1101344 [+] [orf19.450, GAT2, orf19.449, orf19.448, orf19.446.2]

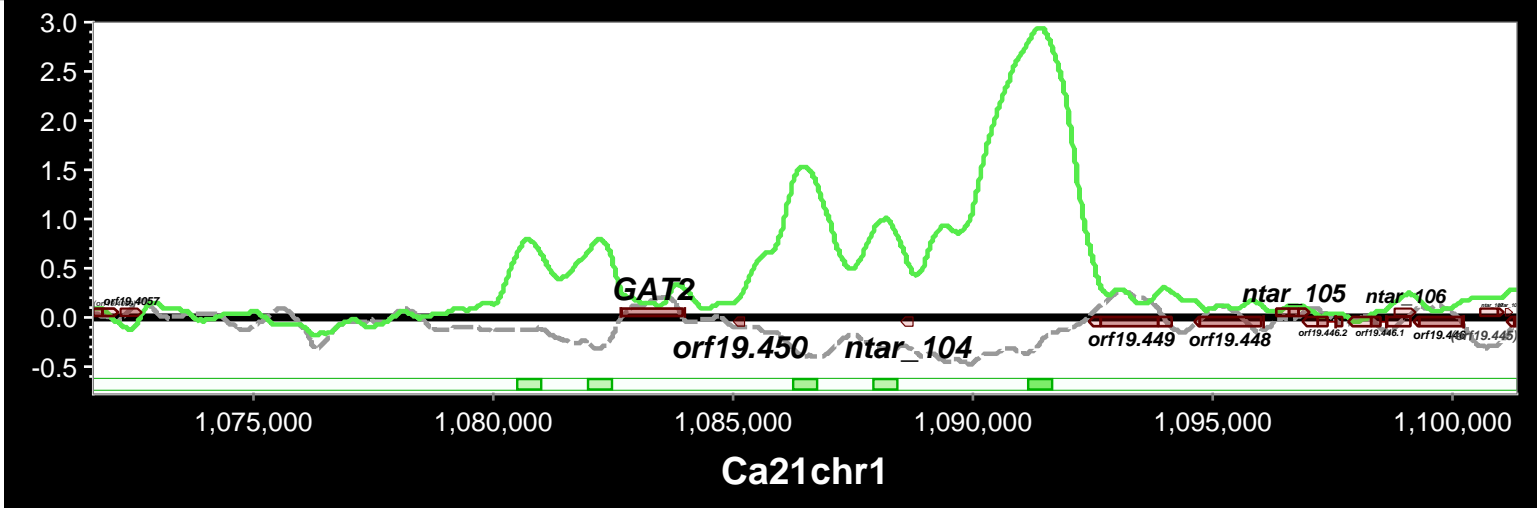

[1.52] Ca21chr5:239859-269542 [+] [orf19.1959, CYC3, CLN3, orf19.1956, orf19.1955]

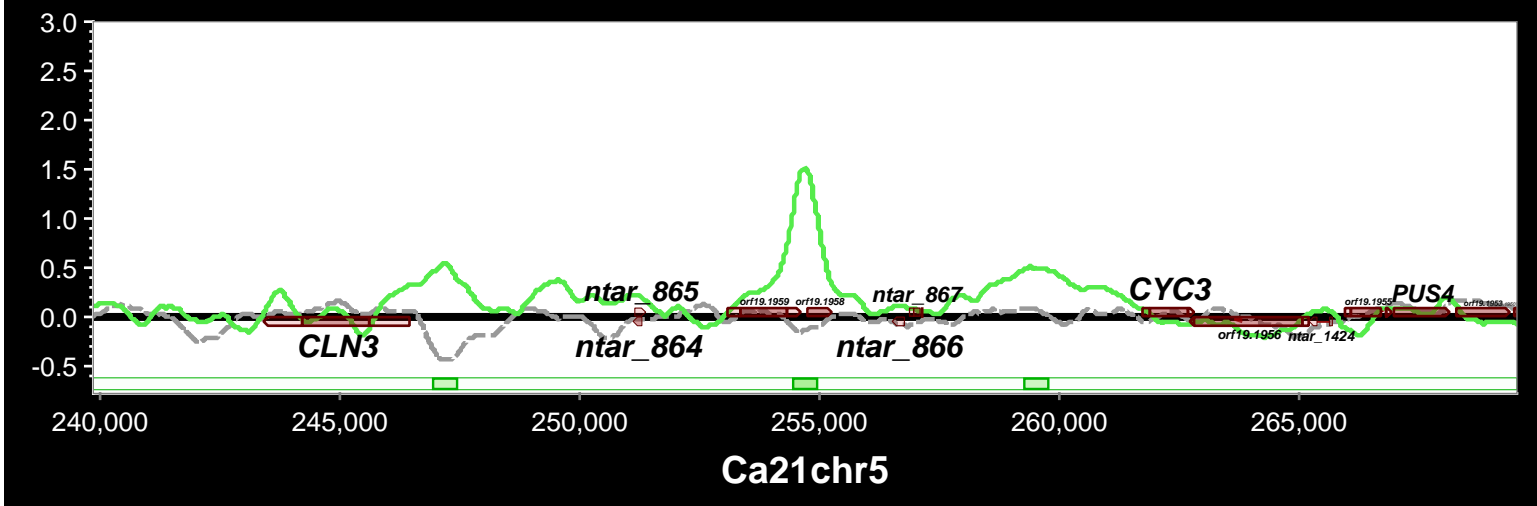

[1.472] Ca21chr7:436740-466423 [+] [CUP9, EXO70, LIG1, GRX1, orf19.6509]

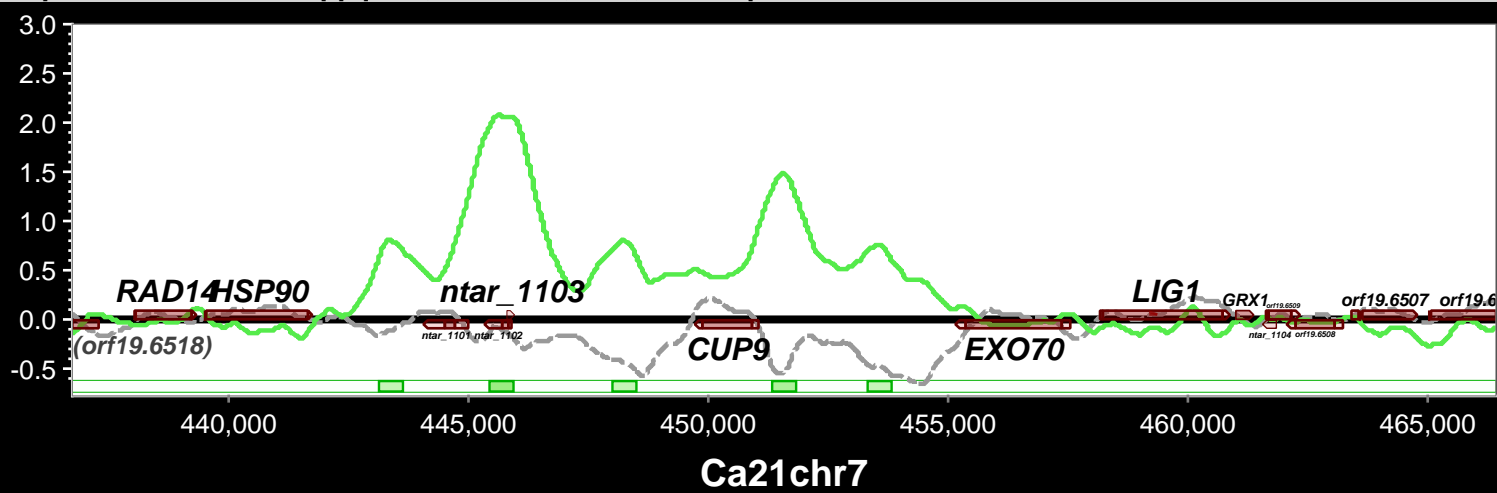

[1.421] Ca21chrR:1516310-1545993 [+] [ALS3, CRZ2, orf19.1815, orf19.1814, URA2]

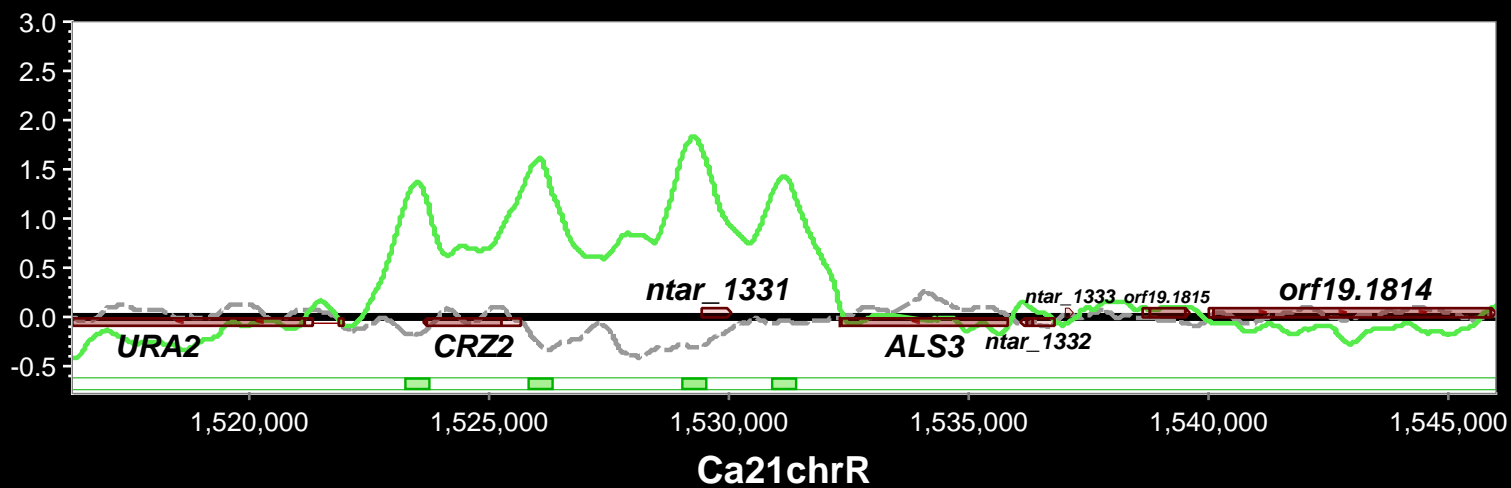

[1.418] Ca21chrR:1-29684 [+] [INO2, orf19.7538, BNR1, orf19.7539.1, tL(CAA)6]

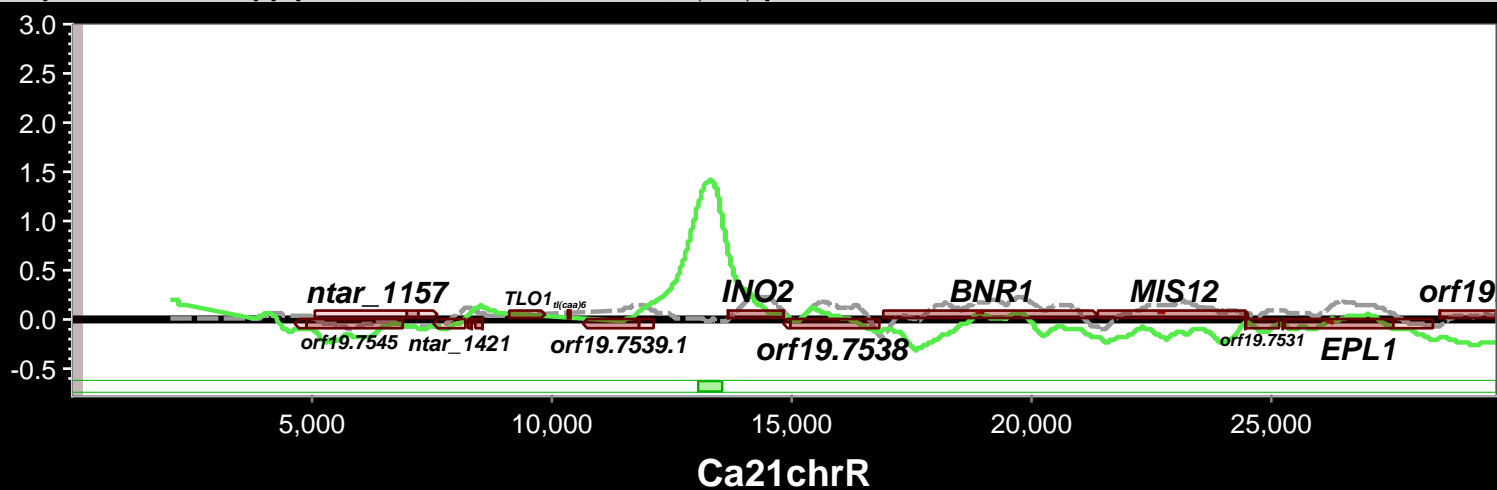

[1.365] Ca21chrR:1508663-1538346 [+] [CRZ2, URA2, SPT10, orf19.2362, ALS3]

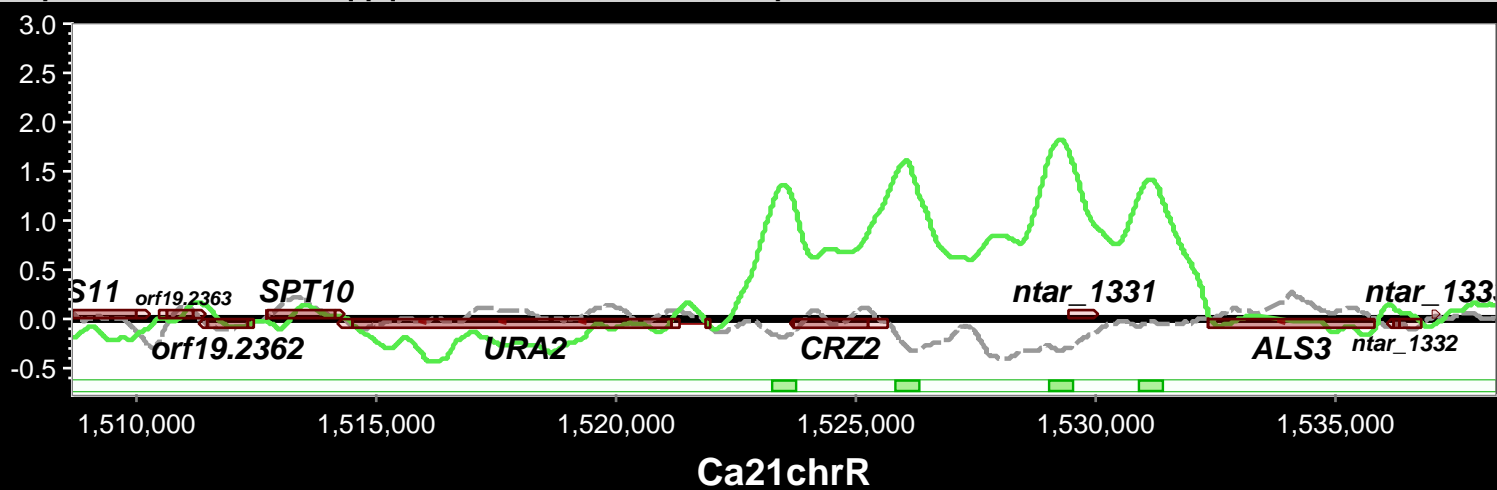

[1.355] Ca21chr5:481908-511591 [+] [PTH2, orf19.4230, orf19.4229, PTH1, THR4]

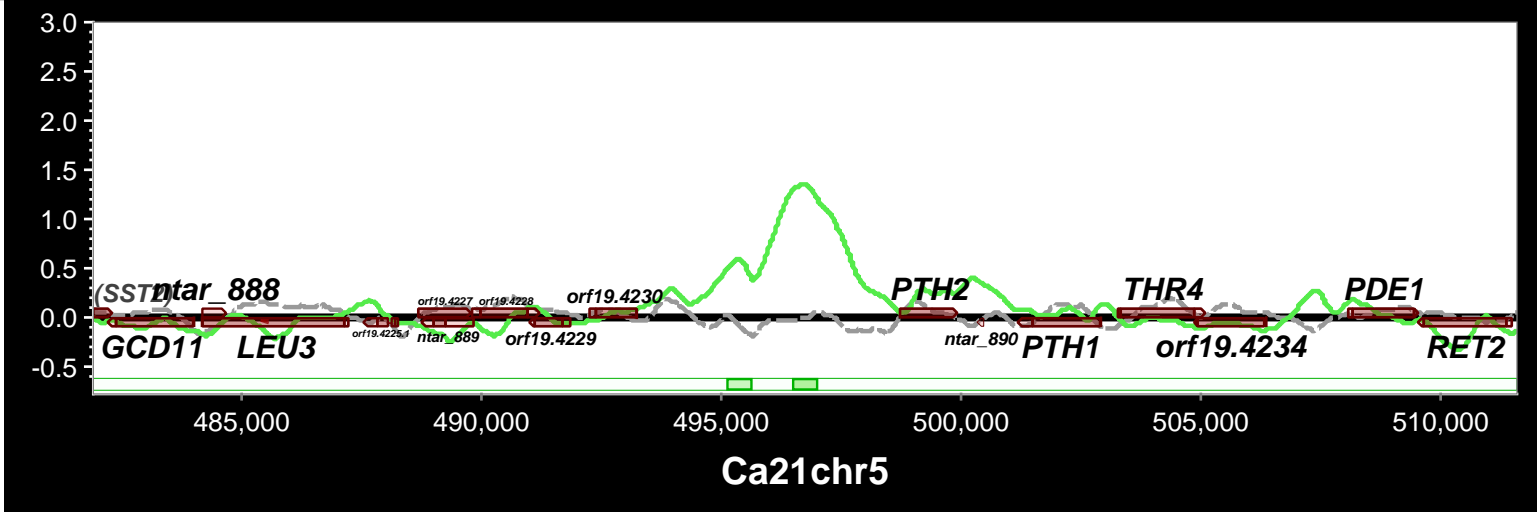

[1.351] Ca21chr1:1865221-1894904 [+] [VCX1, ERG1, PCL2, GCD6, orf19.409]

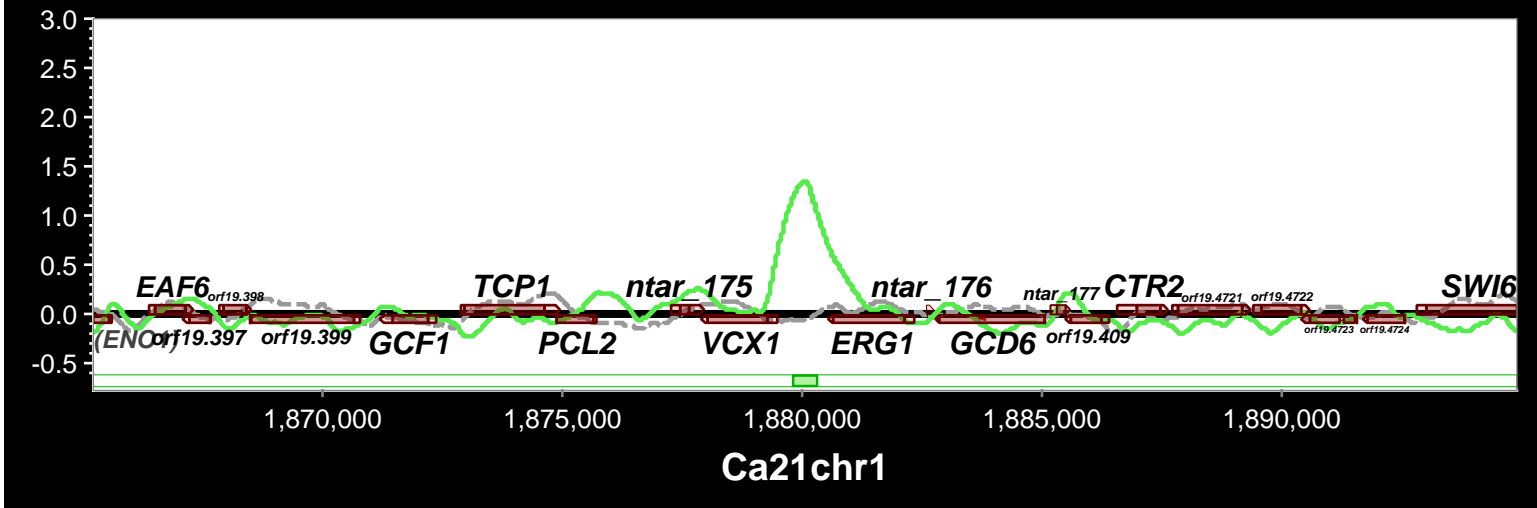

[1.347] Ca21chr1:436614-466297 [+] [orf19.3671, GAL1, GAL10, orf19.3673, GAL102]

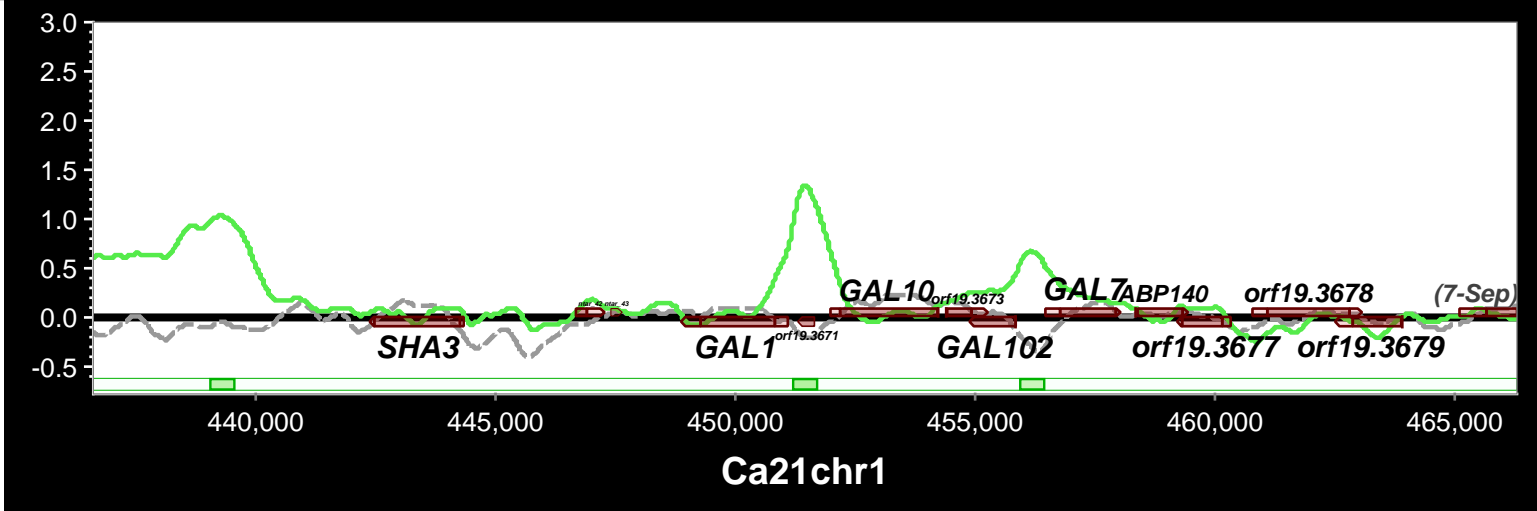

[1.336] Ca21chrR:1701392-1731075 [+] [tG(GCC)1, orf19.612, ASF1, EFG1, orf19.3714]

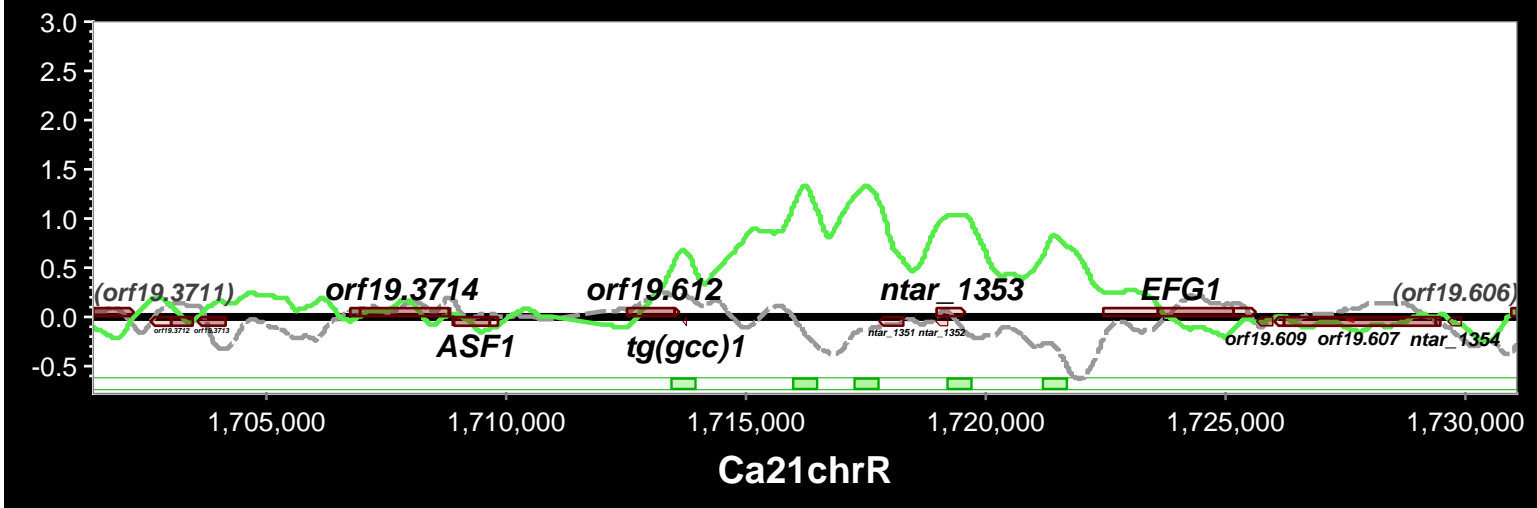

[1.319] Ca21chr3:1343538-1373221 [+] [orf19.7381, orf19.7380, CAM1, FAA2, MNN9]

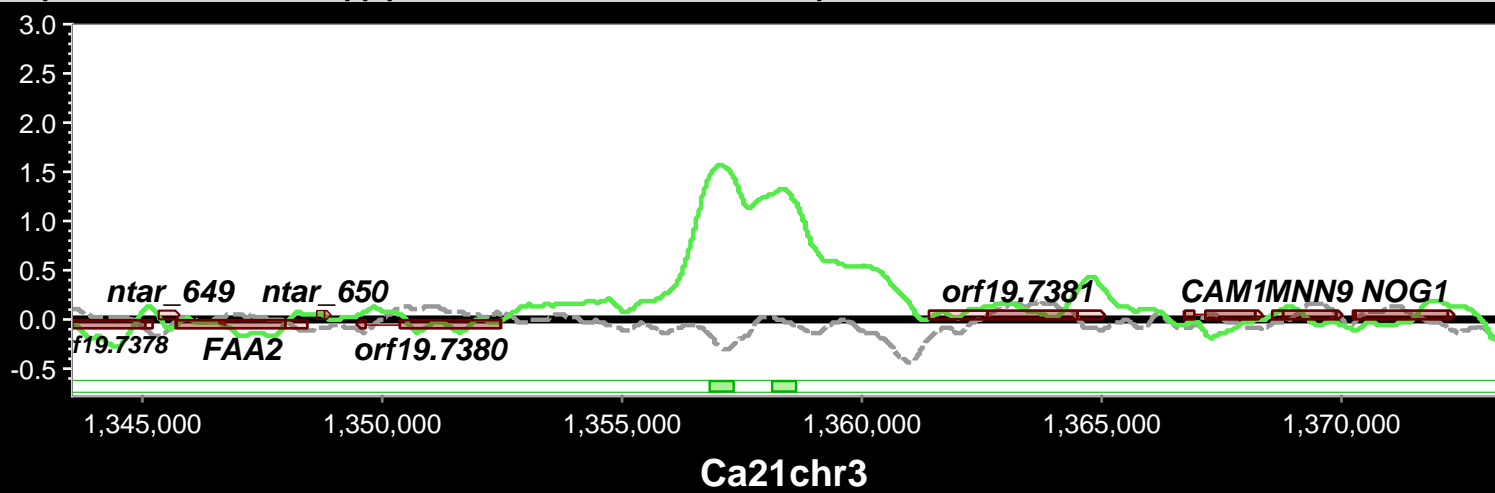

[1.319] Ca21chrR:1702672-1732355 [+] [tG(GCC)1, orf19.612, EFG1, ASF1, orf19.609]

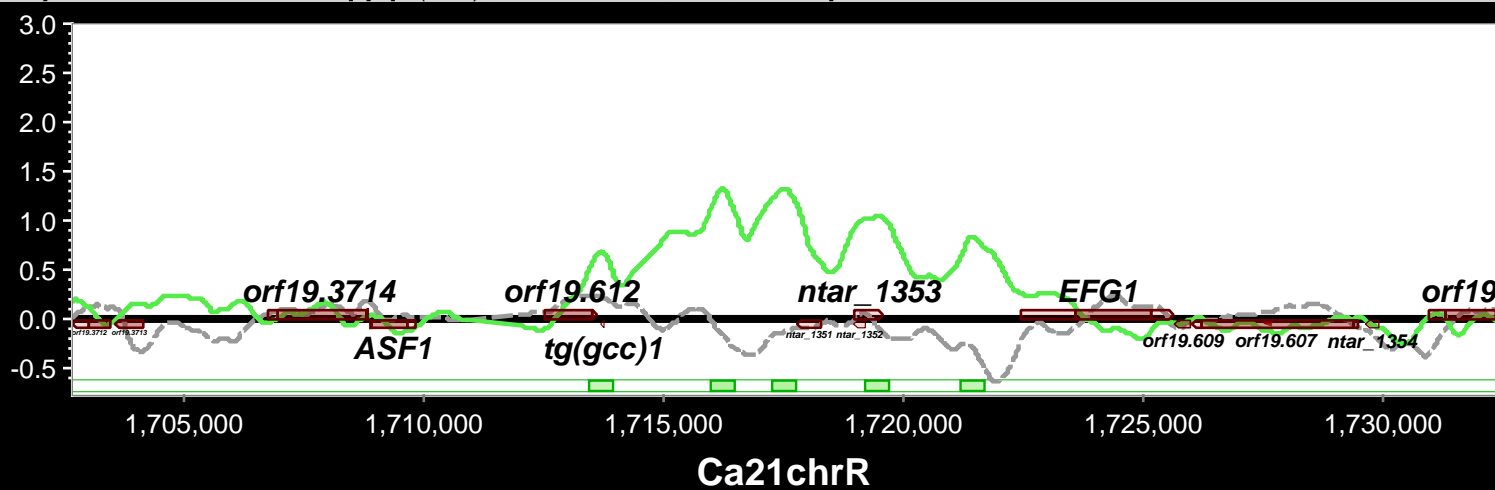

[1.309] Ca21chr6:773874-803557 [+] [ALS1, ALS5, orf19.5735.3, ALS9, CDC50]

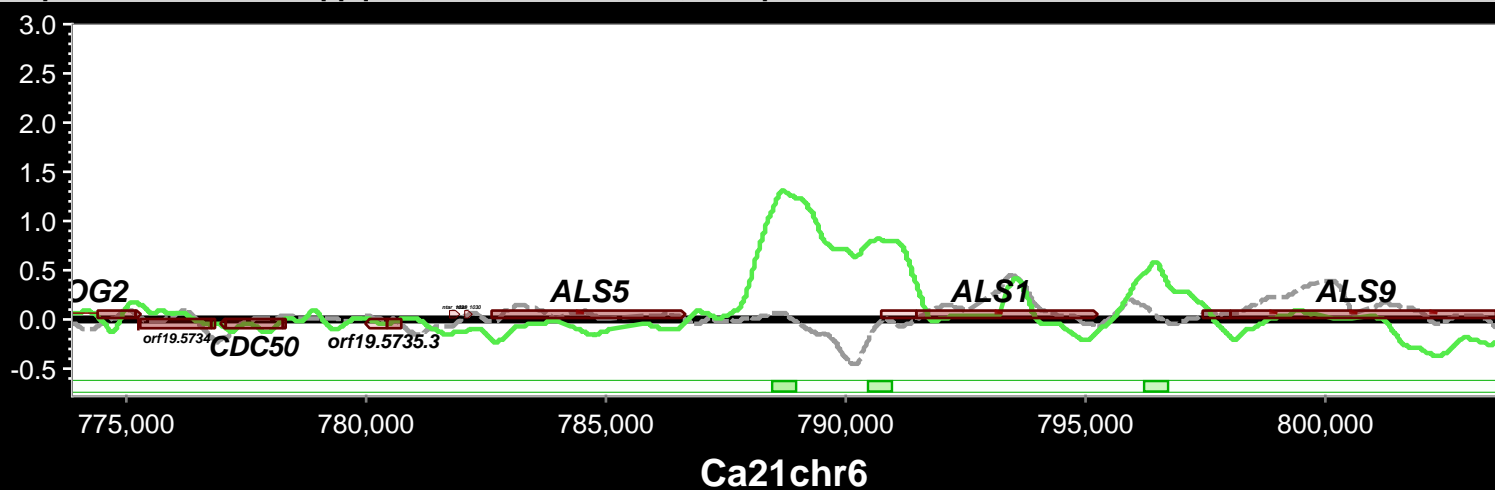

[1.297] Ca21chr1:3146629-3176312 [+] [RIM101, orf19.7250, WSC4, orf19.7252, orf19.7245]

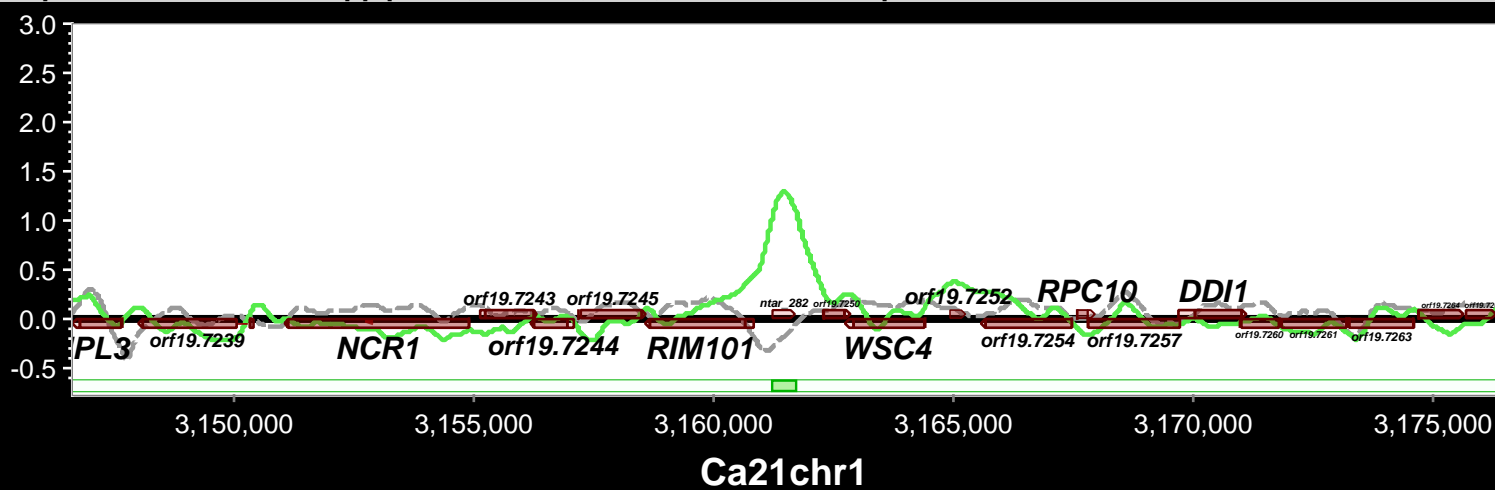

[1.288] Ca21chr3:932520-962203 [+] [ADE2, orf19.5905, TEC1, RPL19A, RAX1]

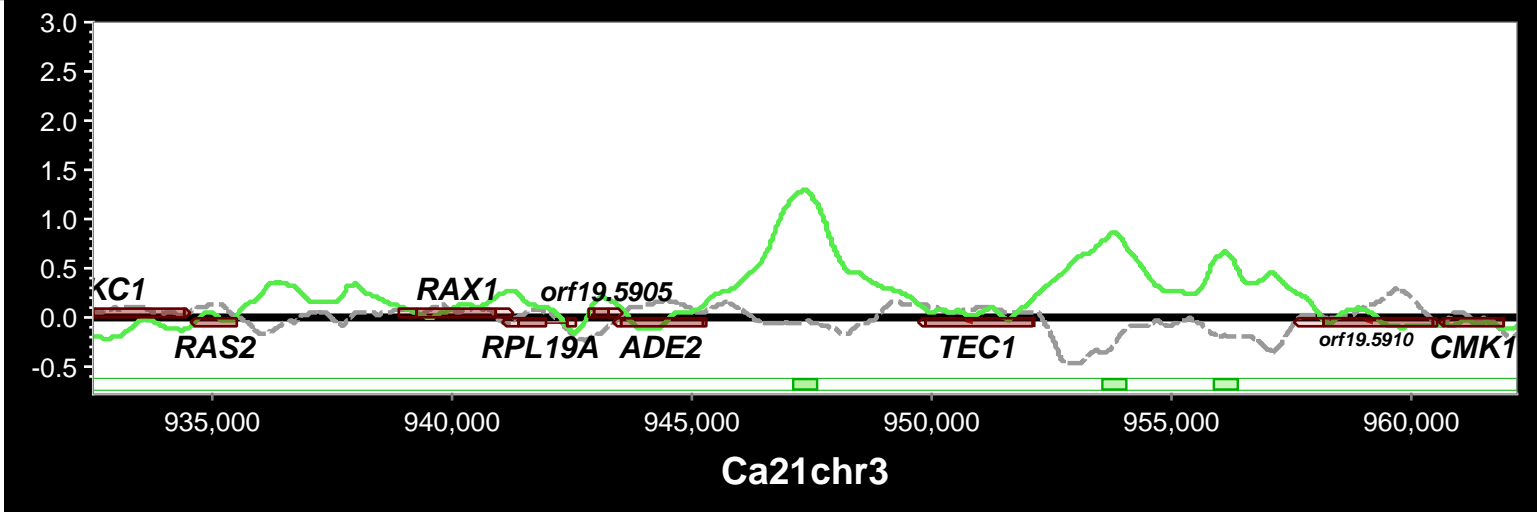

[1.282] Ca21chr2:774060-803743 [+] [tR(UCU)2, tF(GAA)2, YIM1, orf19.849, orf19.846]

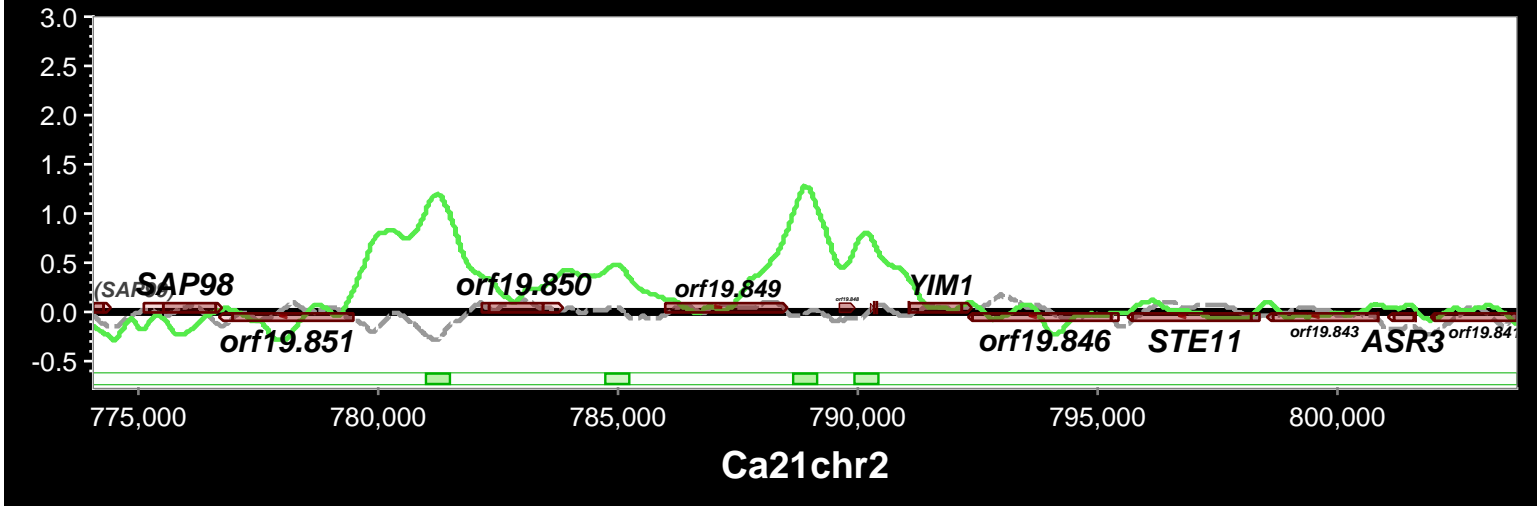

[1.277] Ca21chrR:1875441-1905124 [+] [RDN5, RDN18, RDN58, RDN25, TAR1]

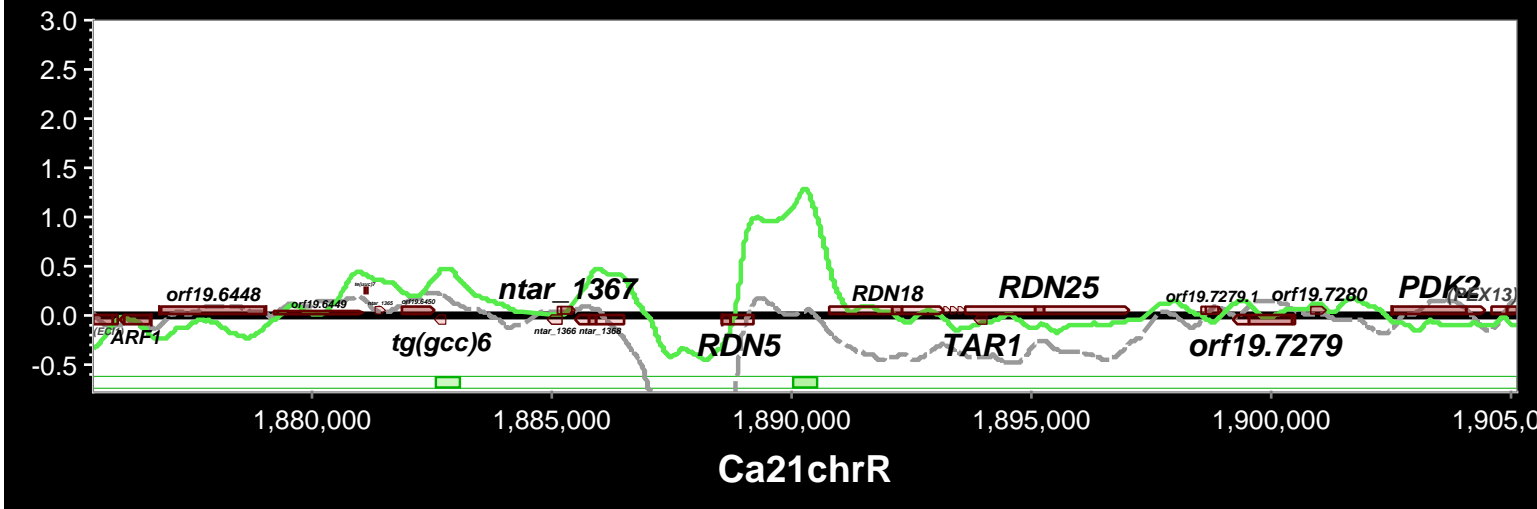

[1.248] Ca21chr5:1101766-1131449 [+] [orf19.4000, orf19.4001, orf19.3999, orf19.3998, DUN1]

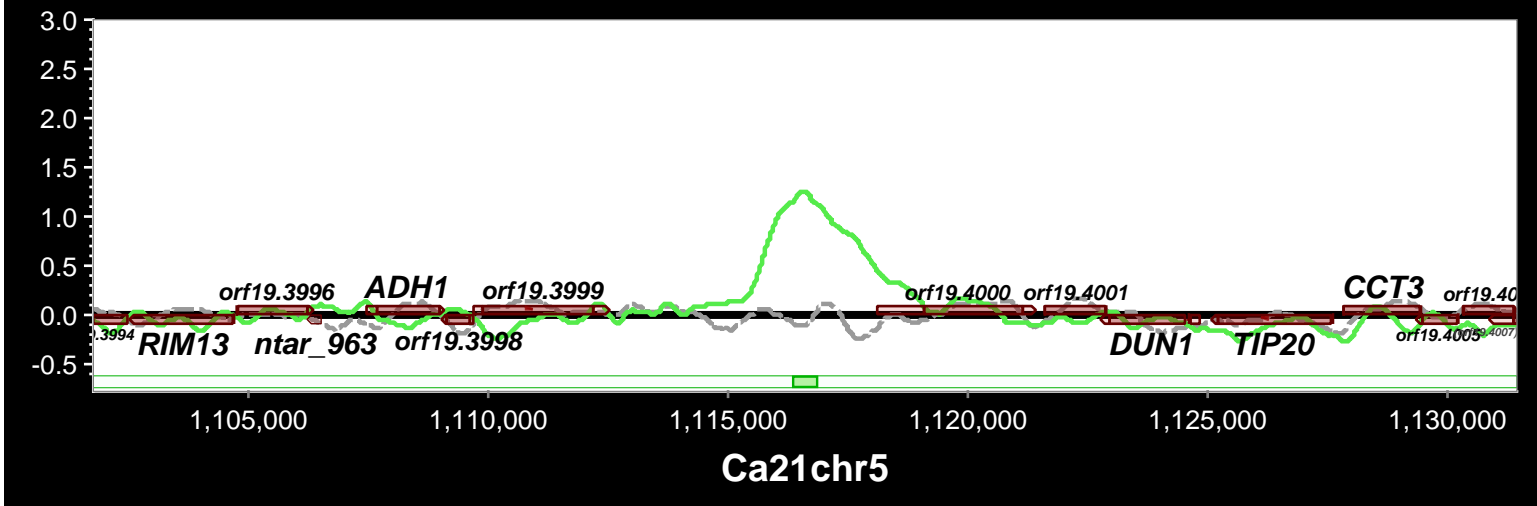



[1.24] Ca21chrR:20331-50014 [+] [orf19.7522, REP1, MKC1, POT1, orf19.7519]

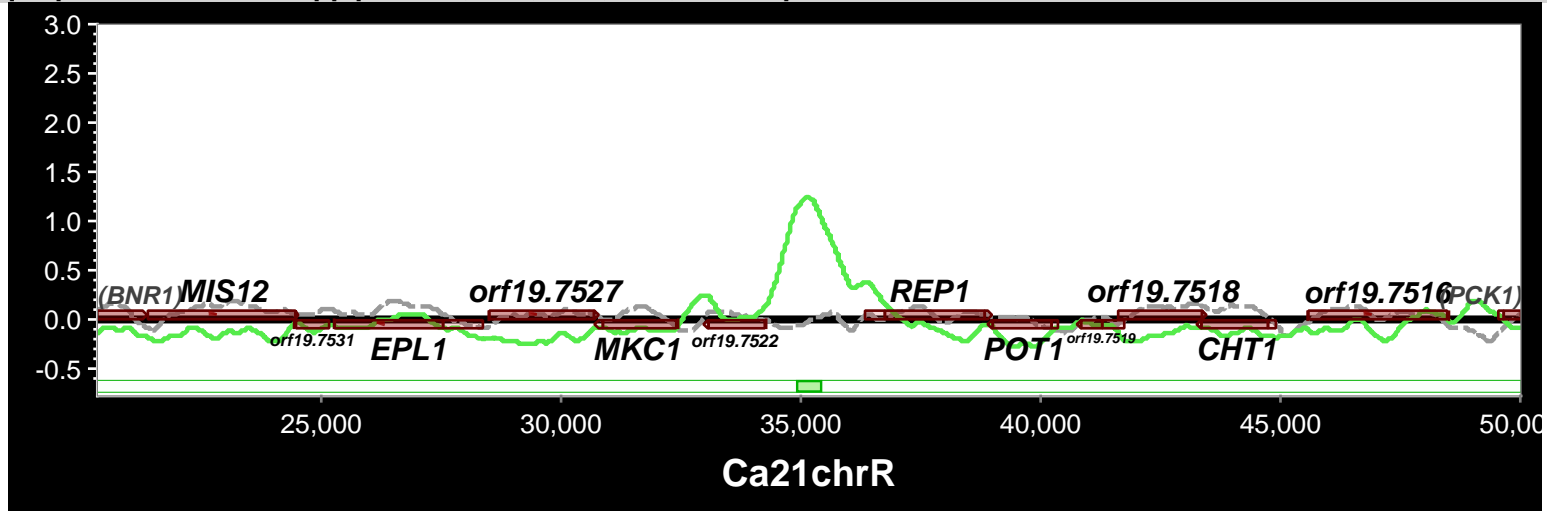

[1.232] Ca21chr3:1707227-1736910 [+] [orf19.6736, orf19.6737, tF(GAA)5, tR(UCU)5, SNR52]

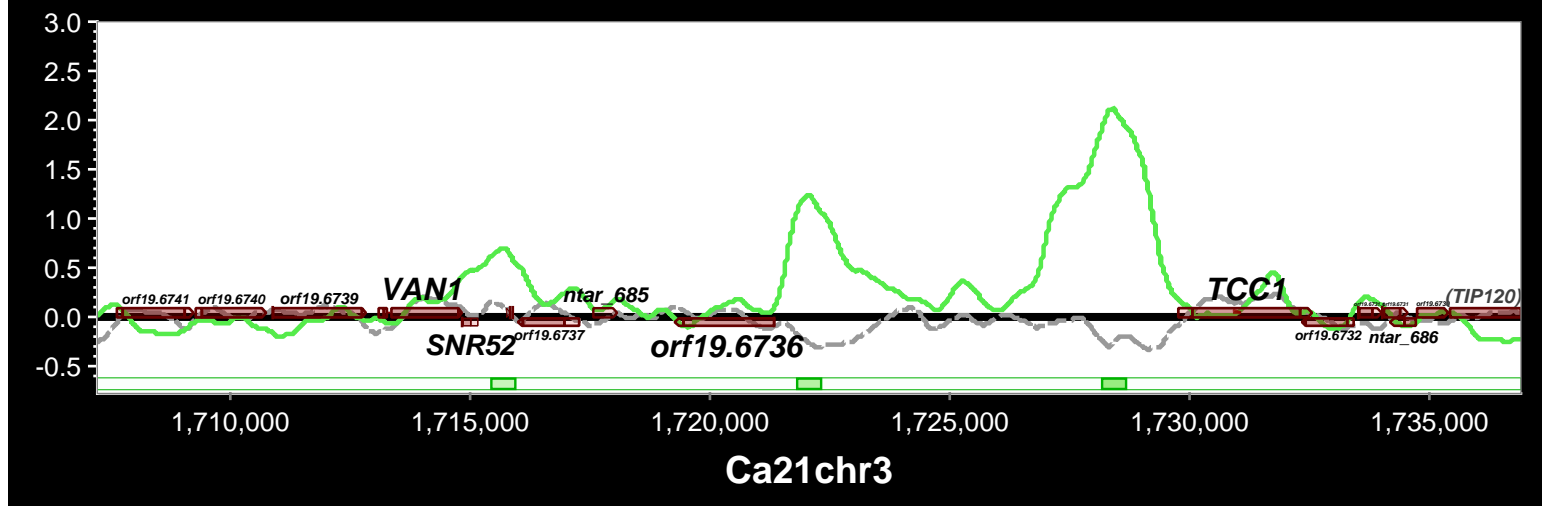

[1.231] Ca21chr2:721370-751053 [+] [ADAEC, orf19.871, orf19.872, orf19.873, orf19.867]

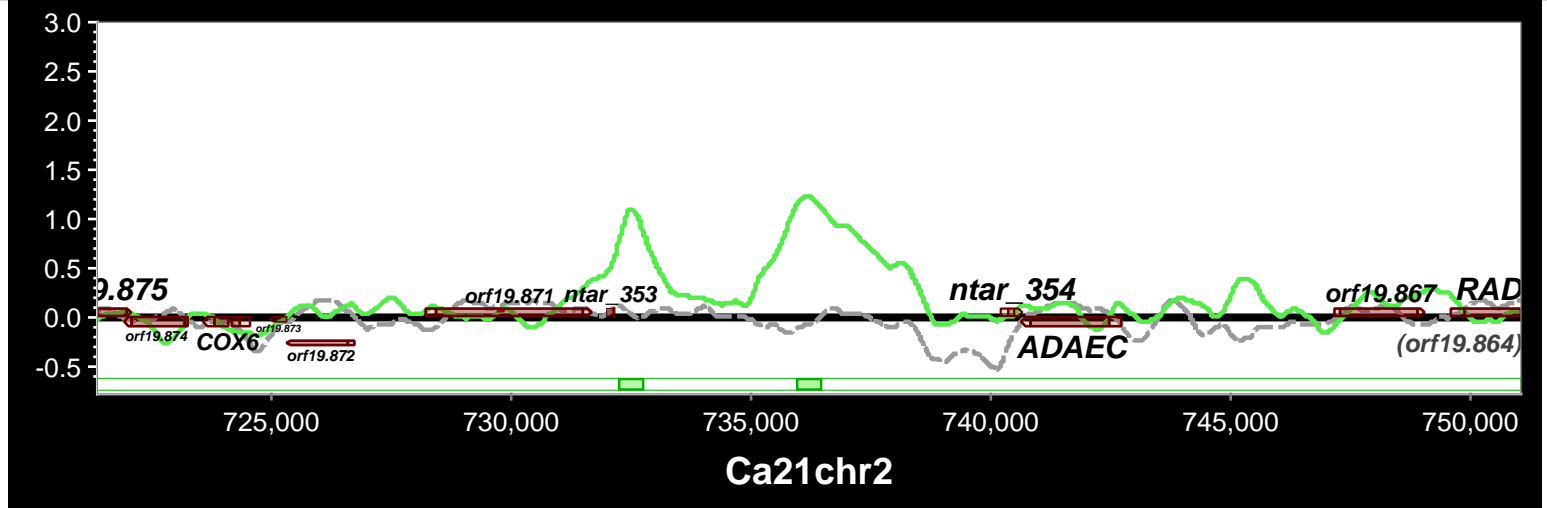

[1.227] Ca21chr6:806458-836141 [+] [HGT10, orf19.5754, orf19.5752, orf19.5755, ORM1]

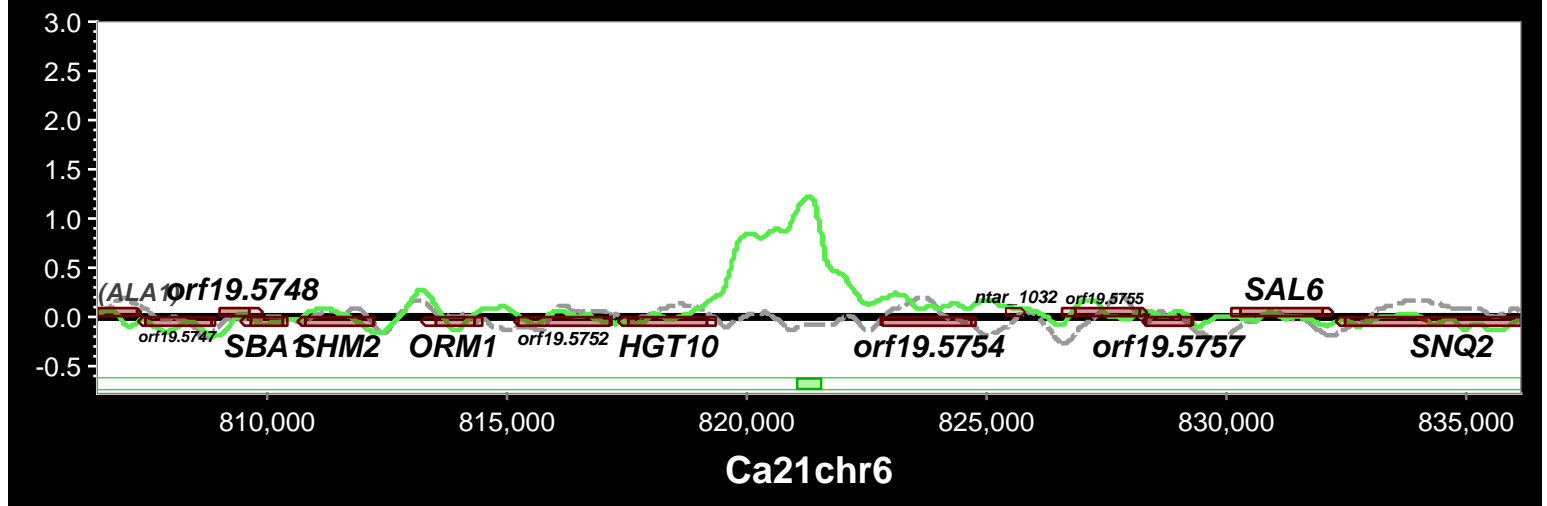

[1.223] Ca21chr1:806441-836124 [+] [orf19.4461, orf19.4463, SEN15, orf19.4459, orf19.4465]

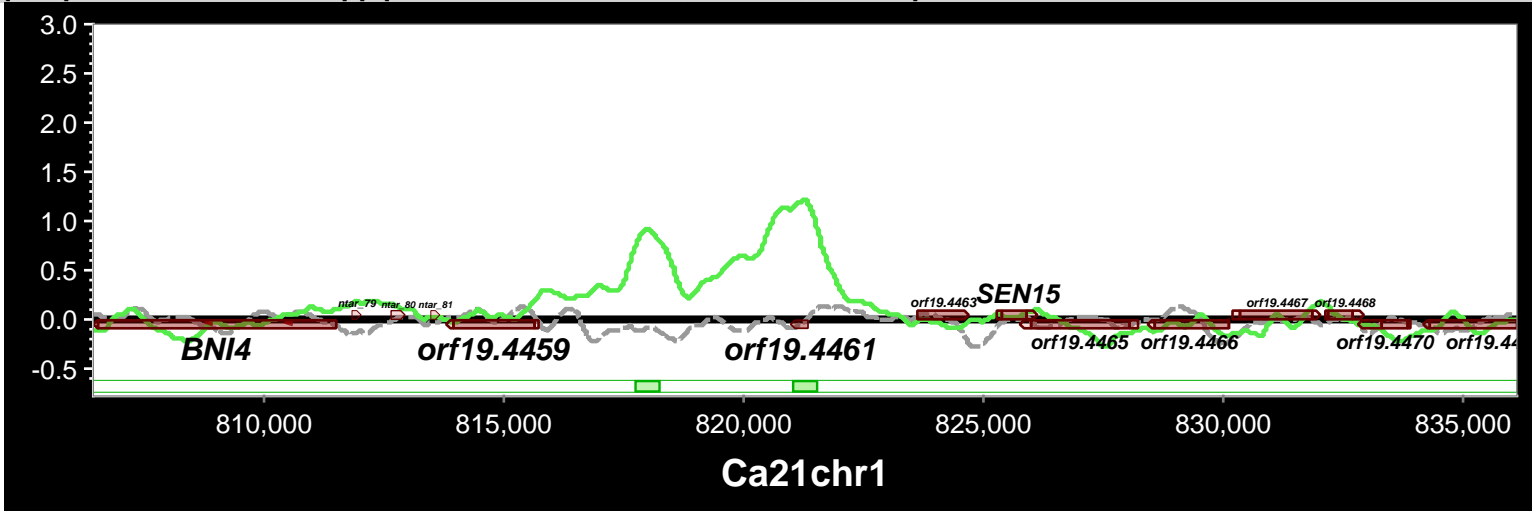

[1.216] Ca21chr4:1410891-1440574 [+] [orf19.2892, orf19.2893, VMA8, orf19.2891, SOU1]

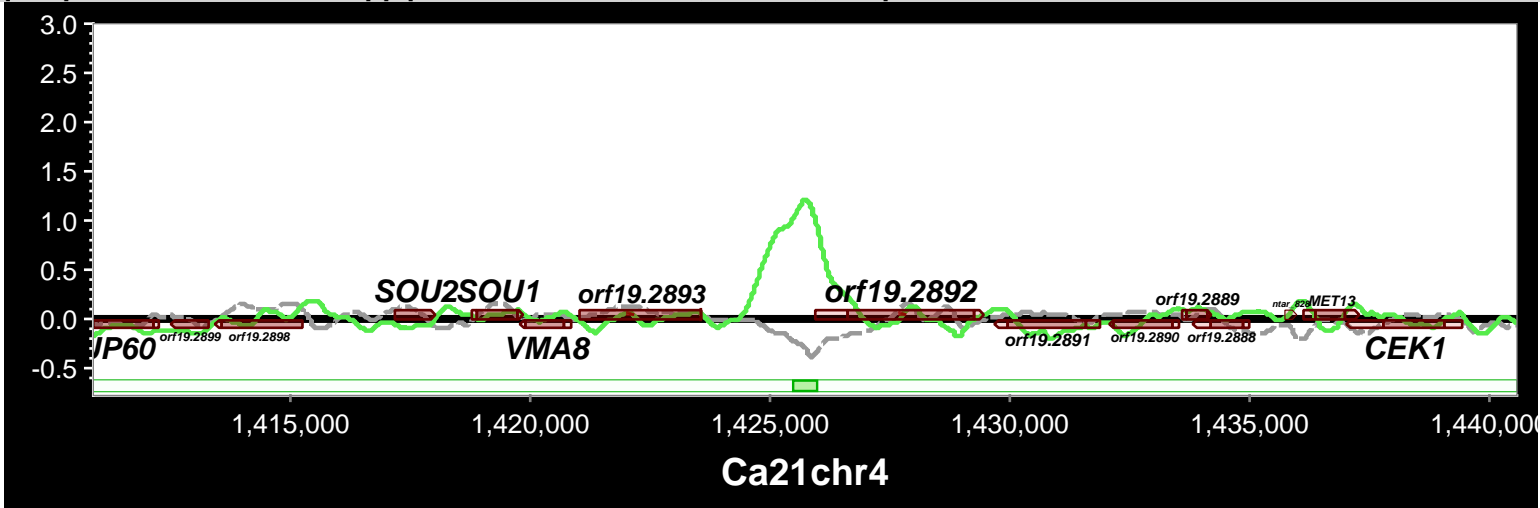

[1.197] Ca21chr6:287299-316982 [+] [orf19.3434, OYE23, orf19.3435, orf19.3432, orf19.3436]

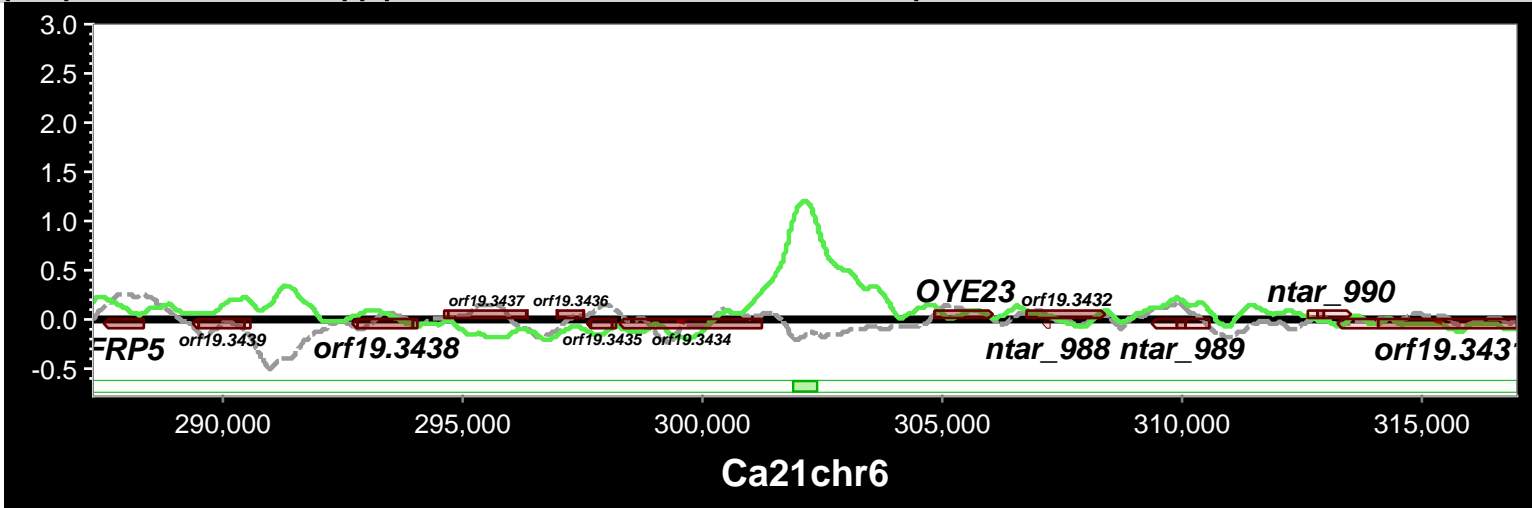

[1.196] Ca21chr2:766404-796087 [+] [orf19.850, orf19.851, orf19.849, SAP98, SAP99]

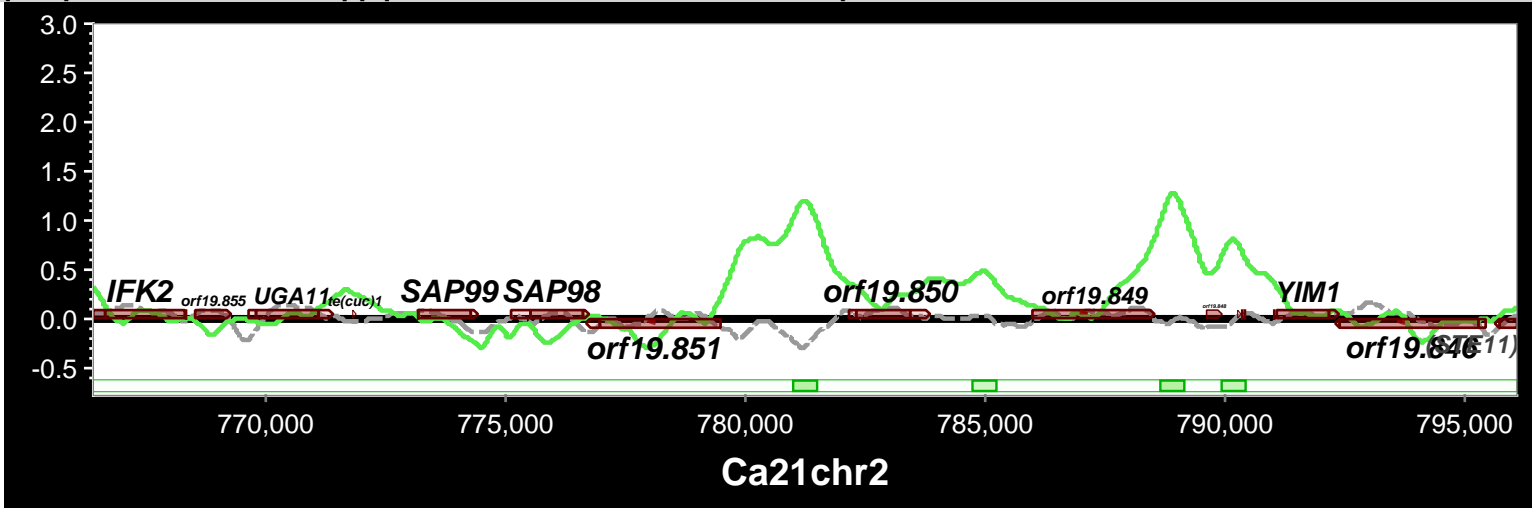

[1.193] Ca21chr6:27896-57579 [+] [orf19.1189, orf19.1190, orf19.1191, CPH2, DNA2]

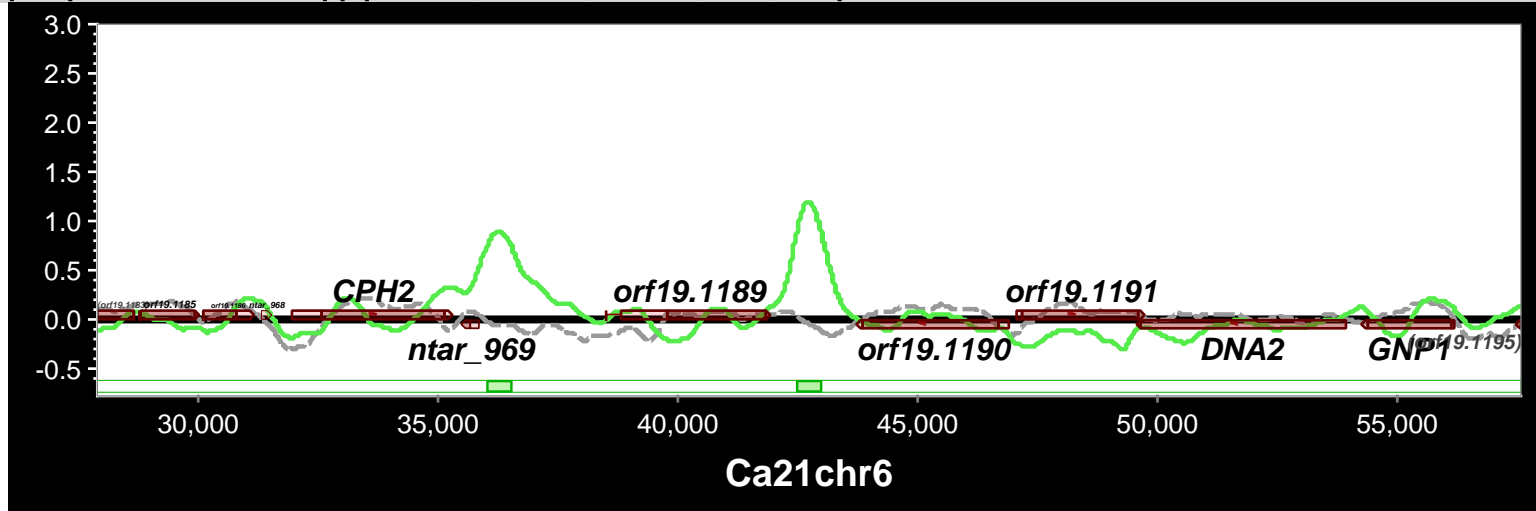

[1.175] Ca21chr3:1550952-1580635 [+] [FCR1, tw(CCA)2, orf19.6818, orf19.6816, TDH3]

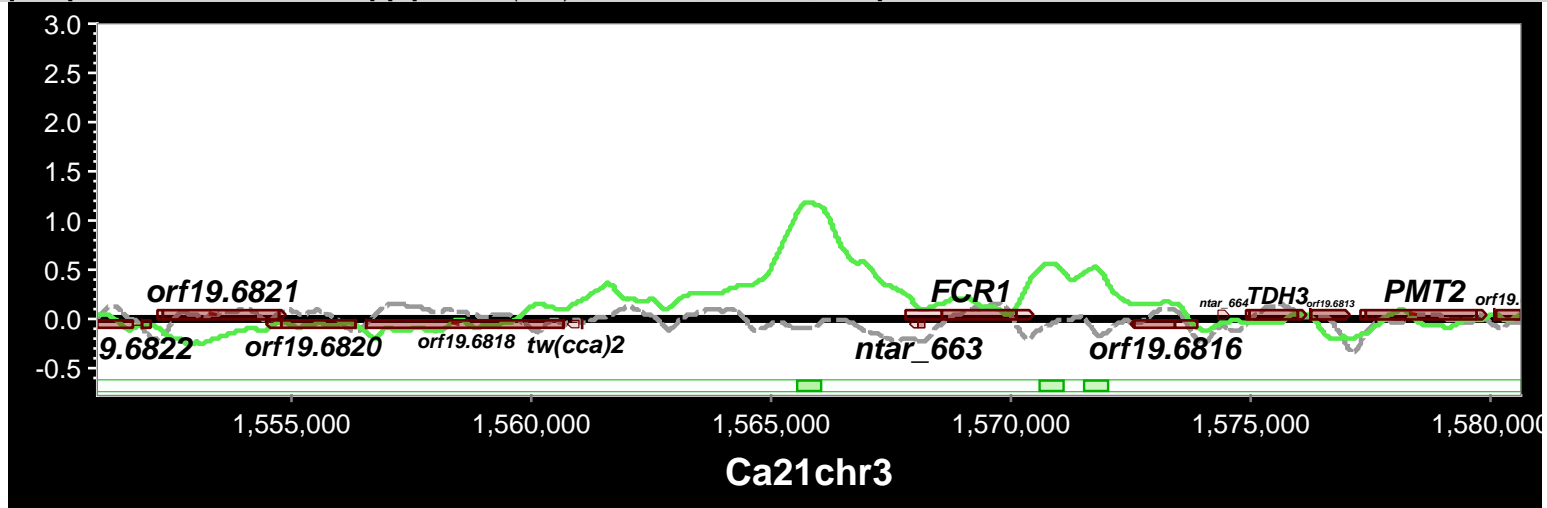

[1.175] Ca21chrR:2096487-2126170 [+] [BET2, DEF1, DPB2, GNP3, YTA6]

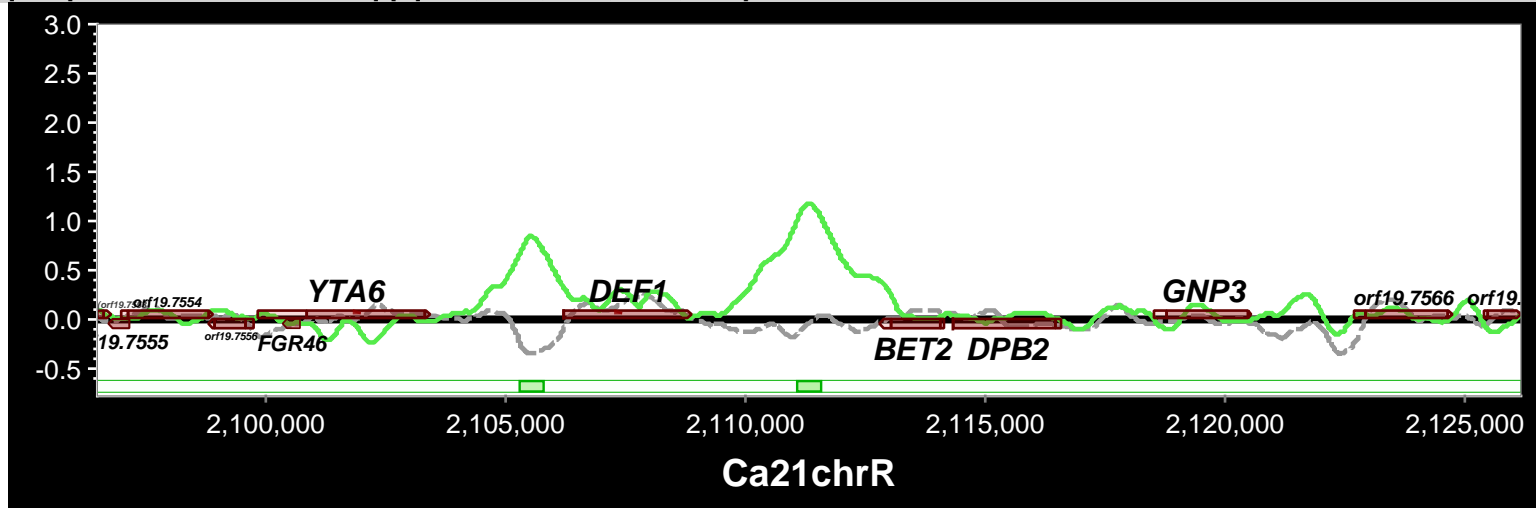

[1.162] Ca21chr2:1730976-1760659 [+] [YWP1, orf19.3617, orf19.3621, ERG9, orf19.3615]

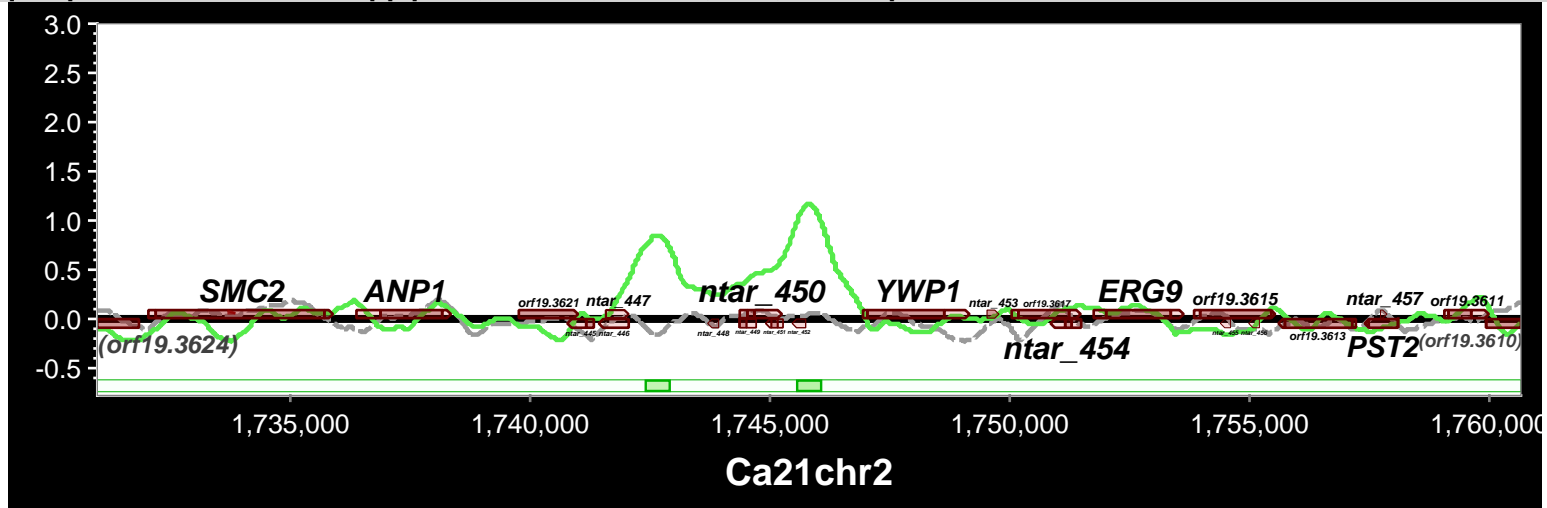

[1.145] Ca21chrR:1298216-1327899 [+] [orf19.3868, orf19.3869, RPL7, ADE13, RFX1]

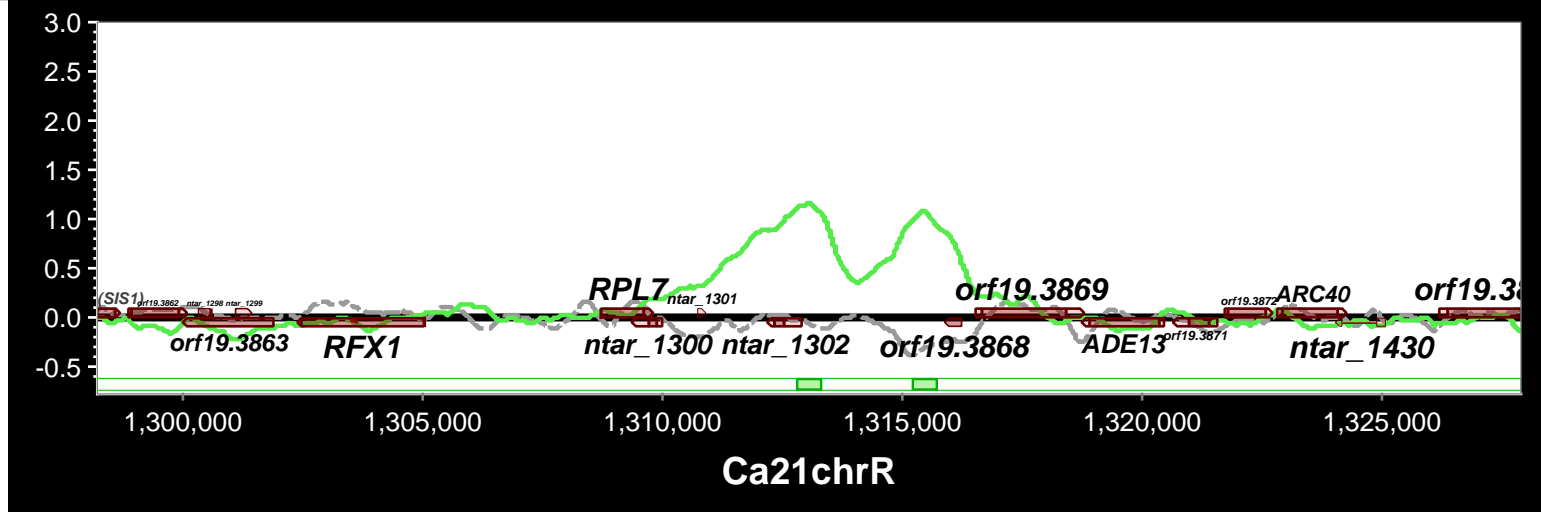

[1.14] Ca21chr3:1098239-1127922 [+] [orf19.5991, WOR2, orf19.5989, orf19.5987, THI4]

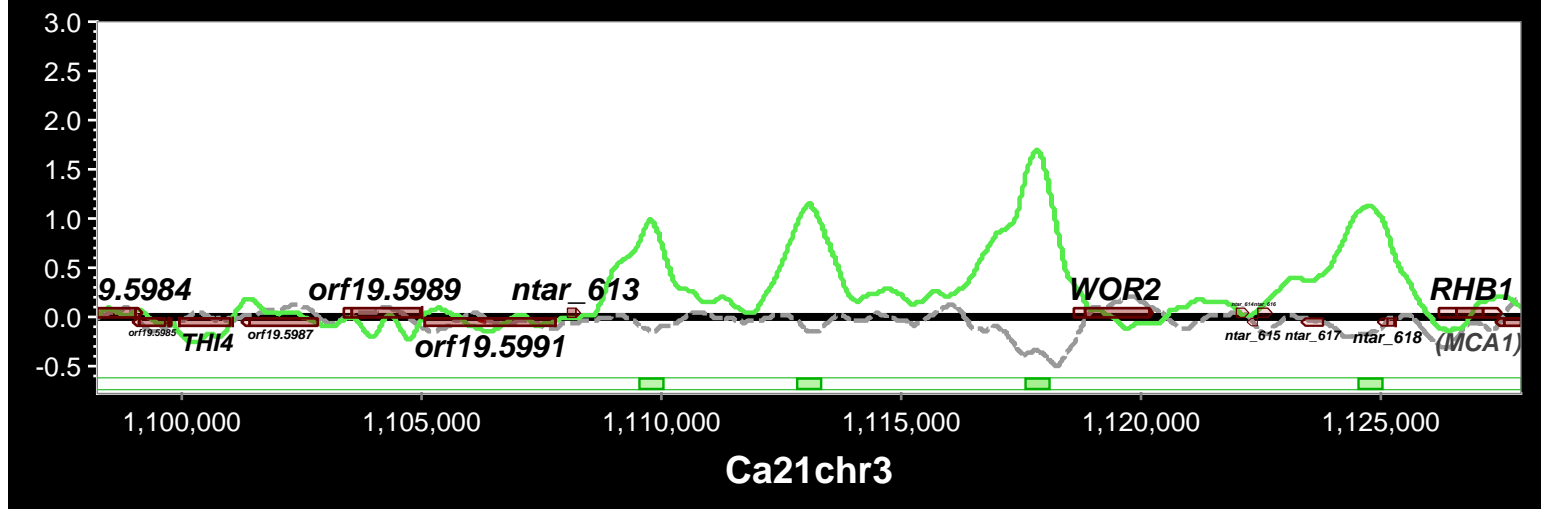

[1.134] Ca21chr3:1109943-1139626 [+] [RHB1, MCA1, RPS19A, WOR2, DYN1]

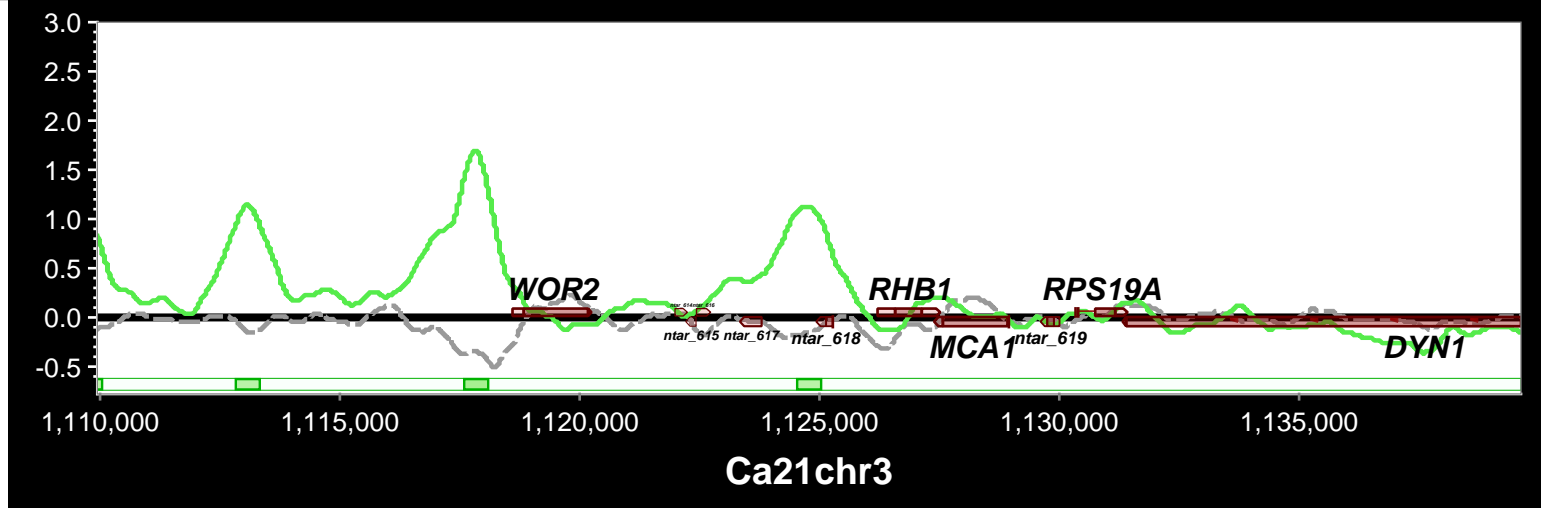

[1.128] Ca21chr3:968612-998295 [+] [orf19.5924, orf19.5921, orf19.5920, orf19.5925, MEA1]

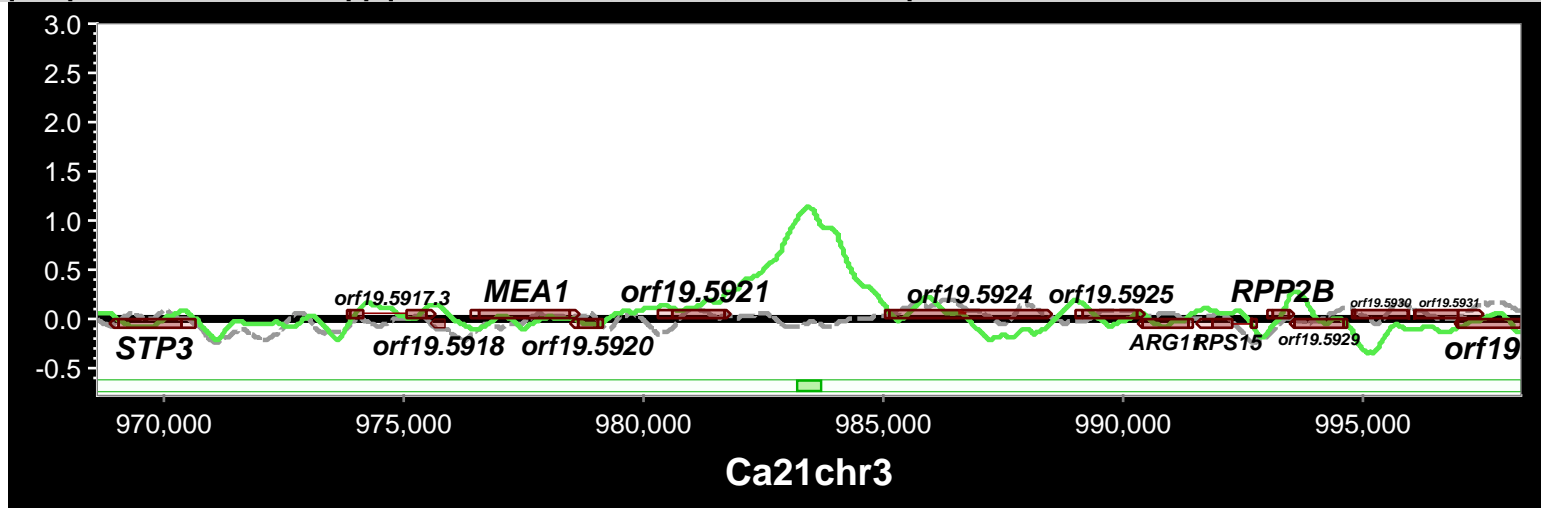

[1.118] Ca21chr7:94535-124218 [+] [orf19.7056, orf19.7054, GAC1, orf19.7057, orf19.7058]

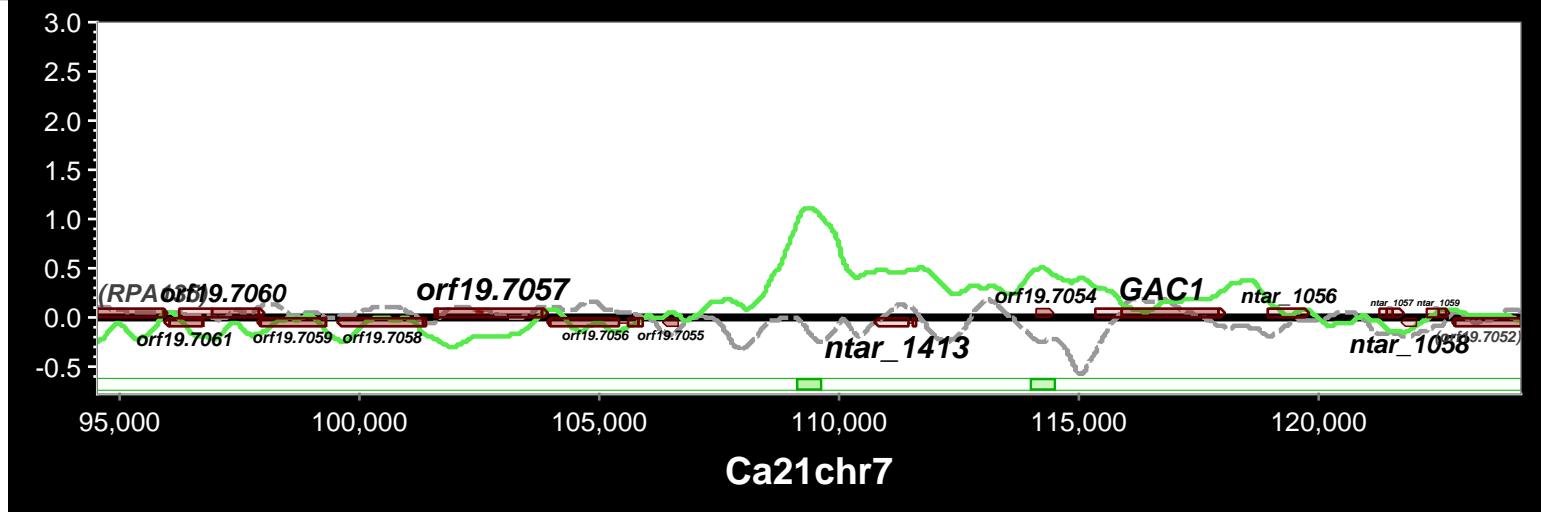

[1.117] Ca21chr4:1085239-1114922 [+] [HAP41, MYO5, orf19.741, ALD6, orf19.736]

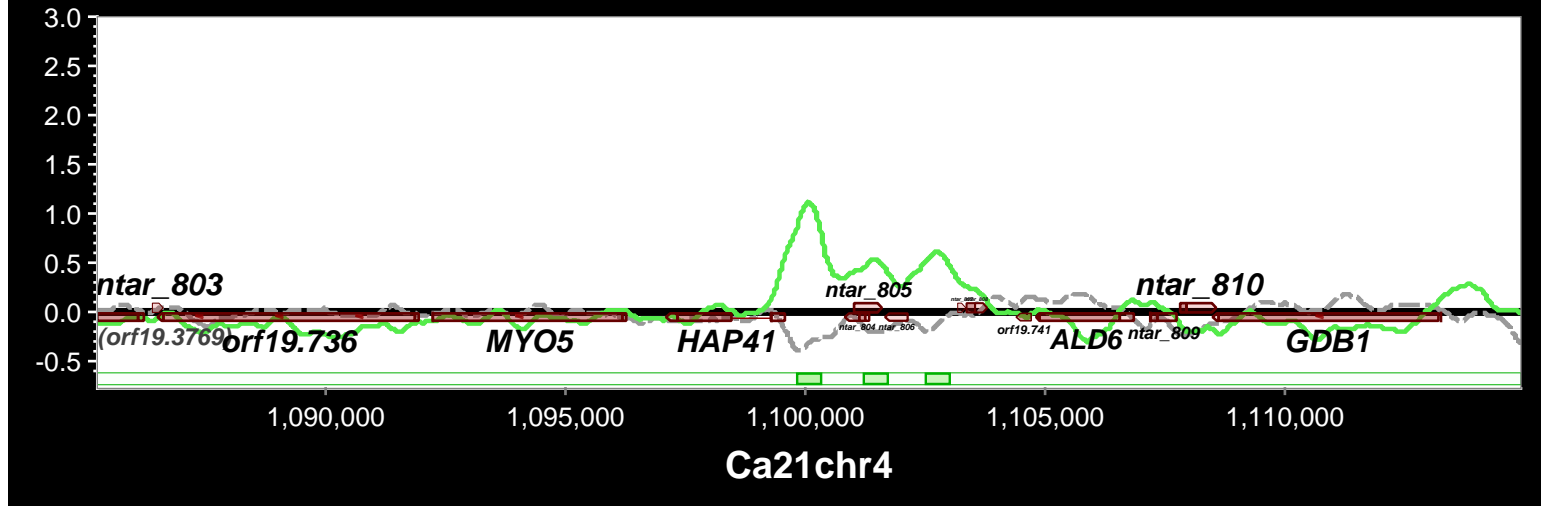

[1.114] Ca21chr4:114184-143867 [+] [orf19.4167, orf19.4166, orf19.4168, orf19.4169, orf19.4170]

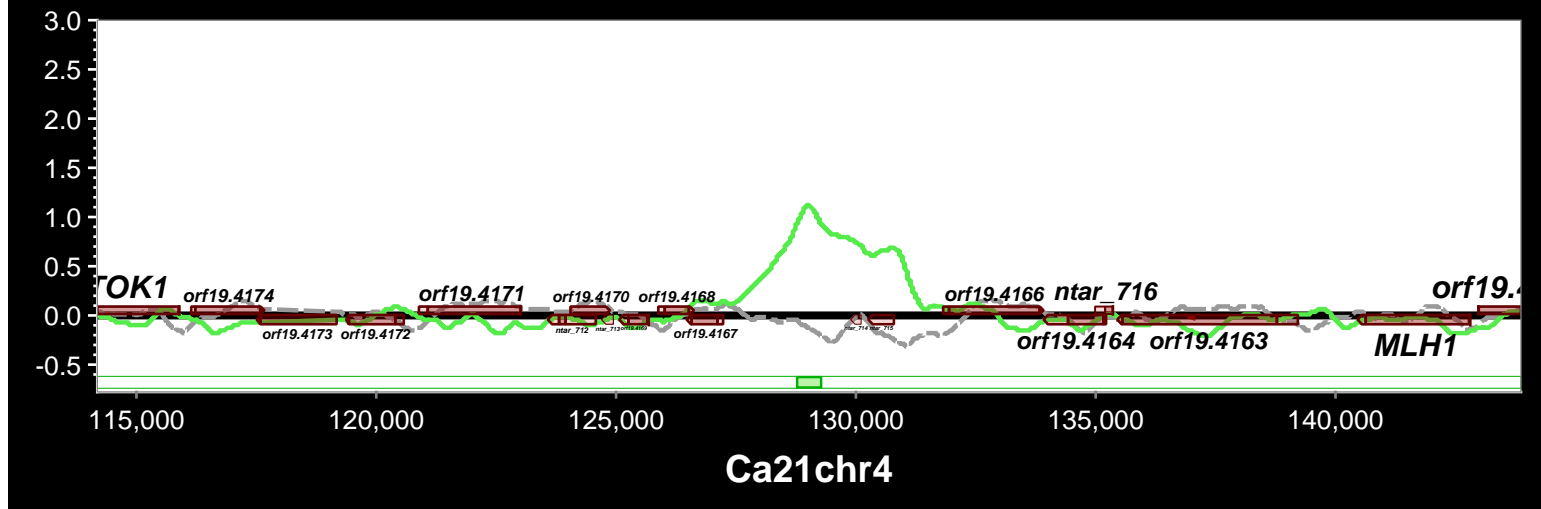

[1.114] Ca21chr4:701154-730837 [+] [MOH1, orf19.3368, orf19.3367, orf19.3366.1, DOT4]

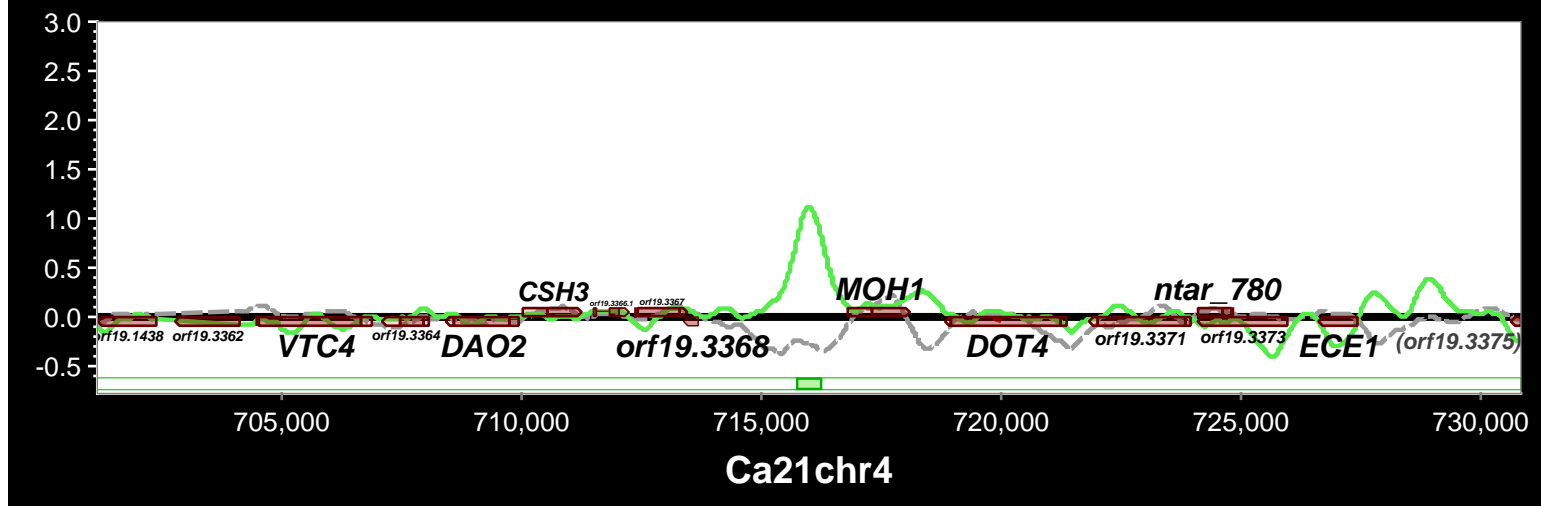

[1.113] Ca21chrR:1256045-1285728 [+] [SOK1, orf19.3848, orf19.3851, SFL1, orf19.3852]

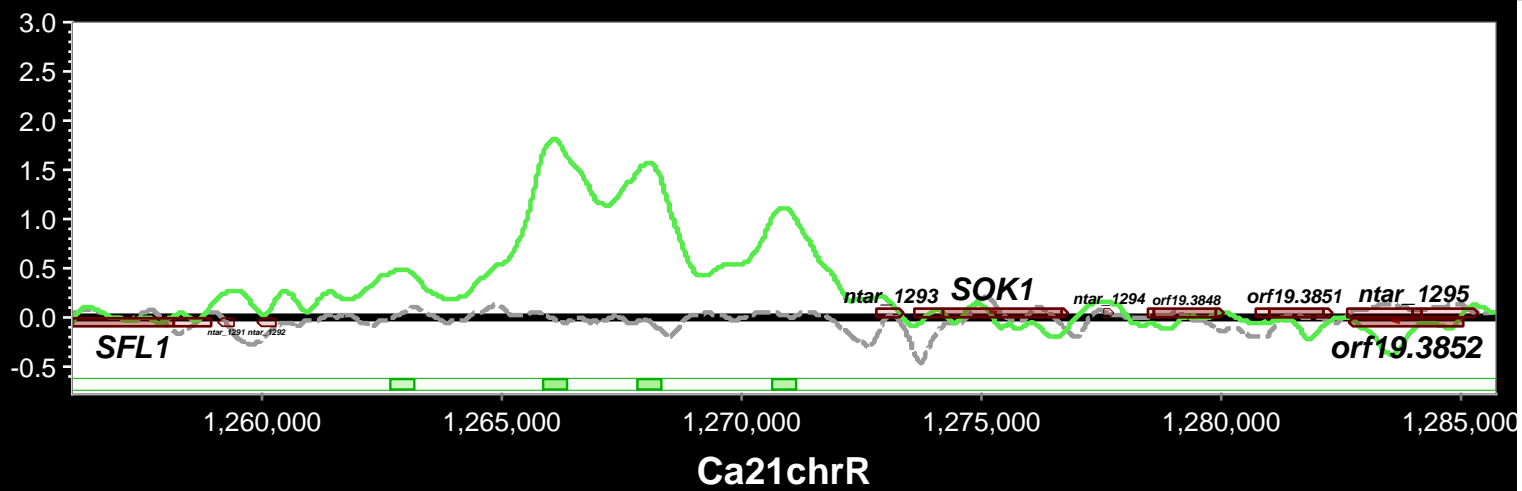

[1.106] Ca21chrR:1979622-2009305 [+] [orf19.7336, PRE8, orf19.7337, ELF1, FCY24]

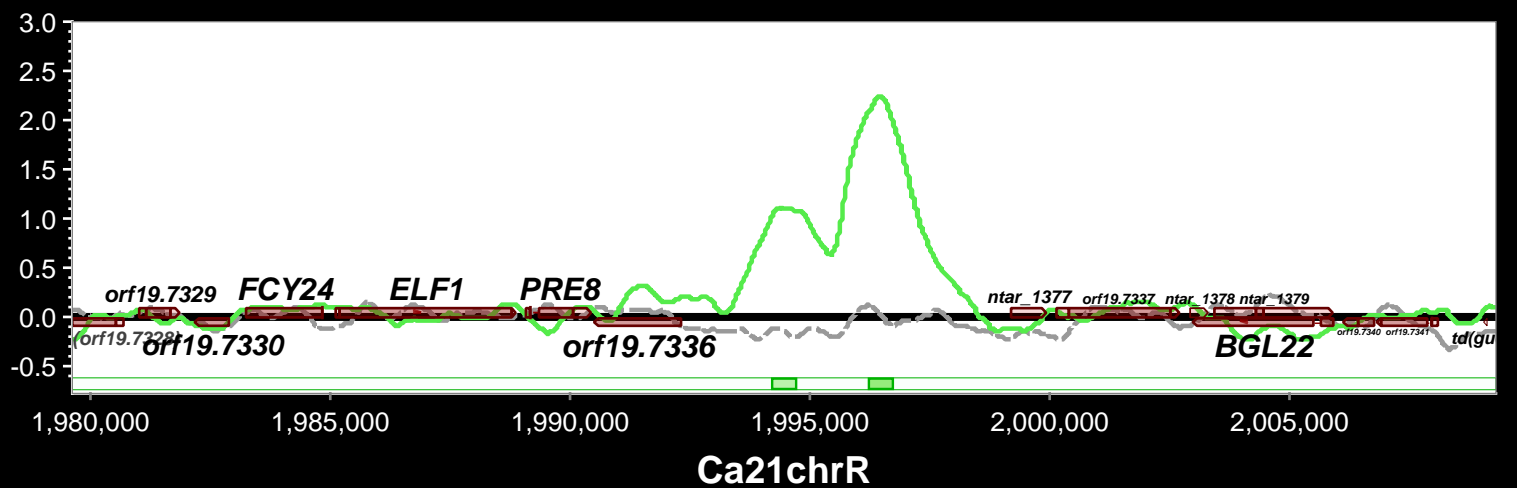

[1.101] Ca21chr2:717660-747343 [+] [orf19.871, orf19.872, orf19.873, COX6, orf19.874]

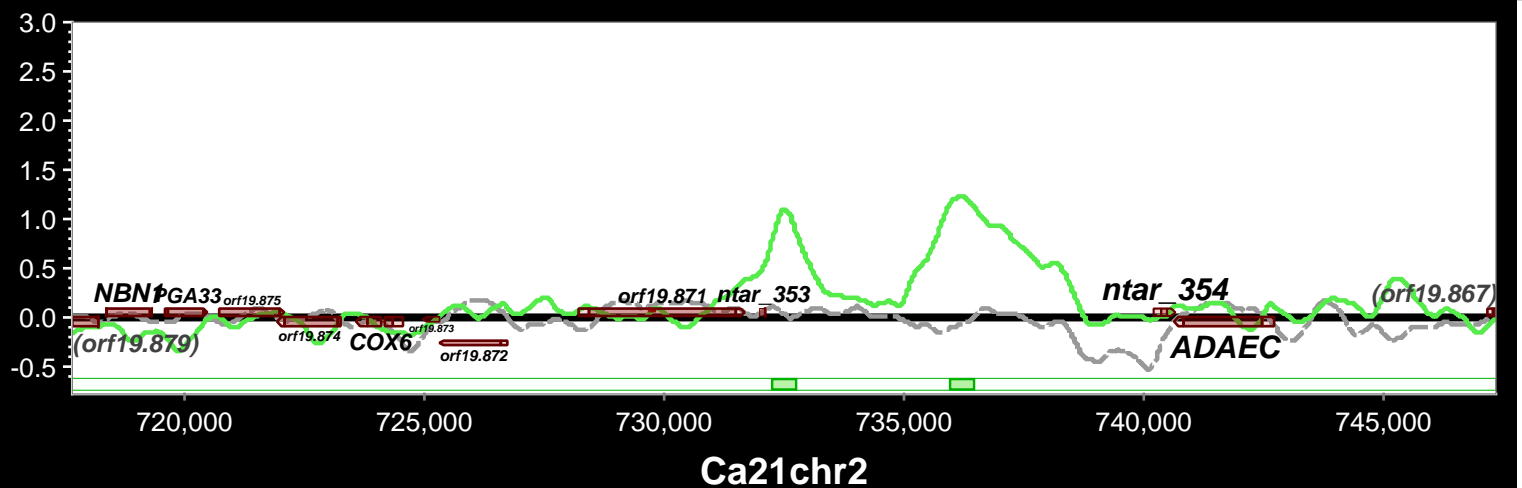

[1.095] Ca21chrR:572357-602040 [+] [orf19.2822, orf19.2821, orf19.2820, orf19.2819, orf19.2818]

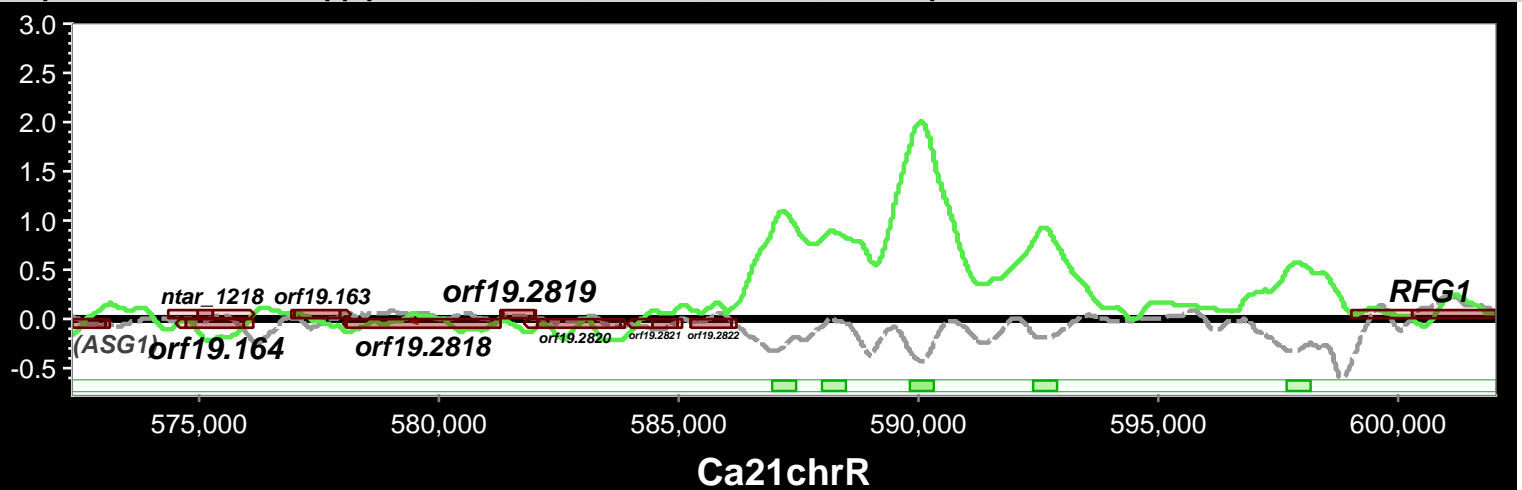

[1.09] Ca21chr2:1787597-1817280 [+] [PIR1, orf19.223, BUD20, orf19.225, orf19.217]

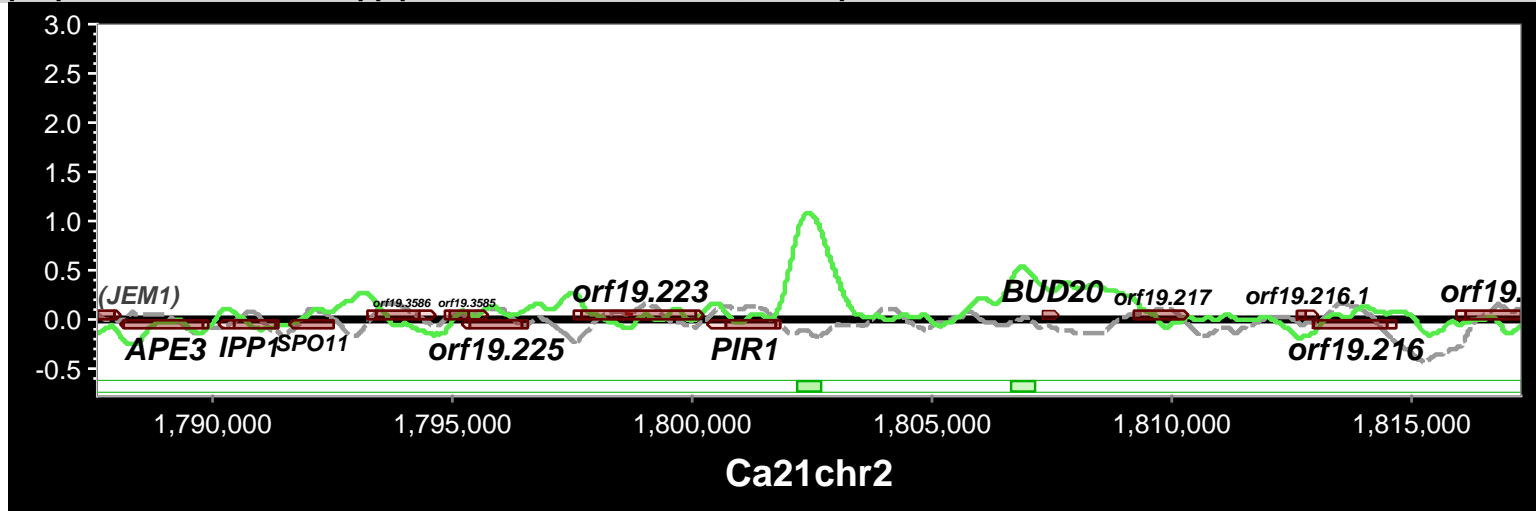

[1.086] Ca21chr3:988956-1018639 [+] [orf19.5933, orf19.5934, orf19.5935, orf19.5932, orf19.5931]

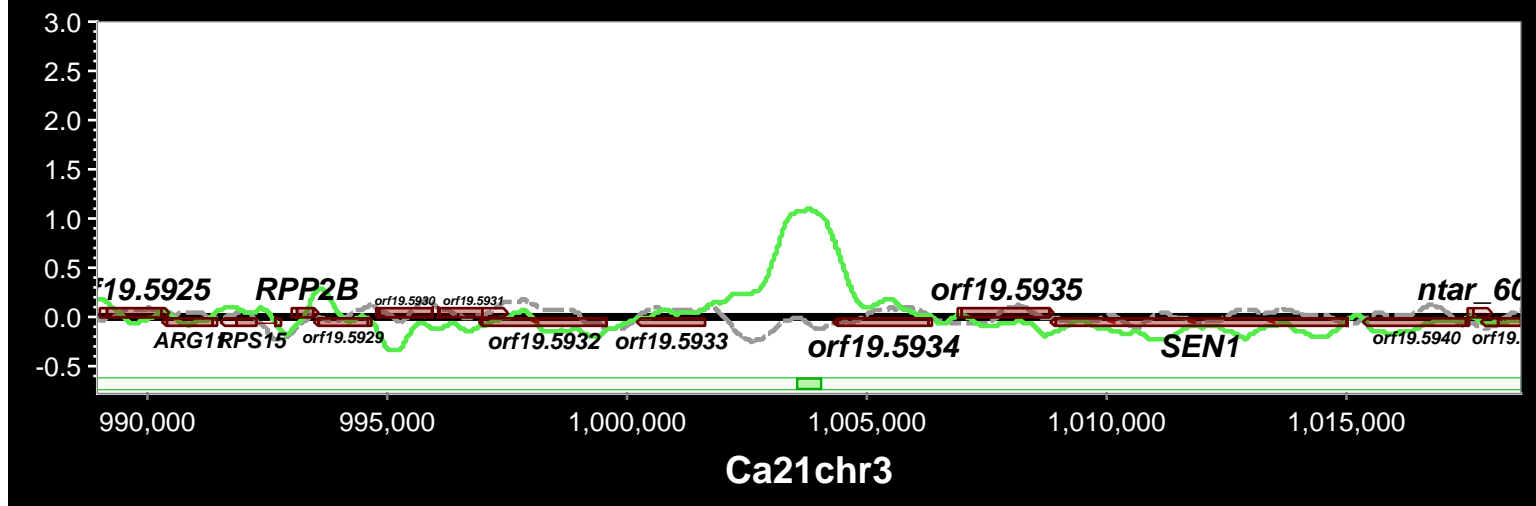

[1.082] Ca21chr7:897605-927288 [+] [orf19.7151, orf19.7152, orf19.7153, NRG1, UTP18]

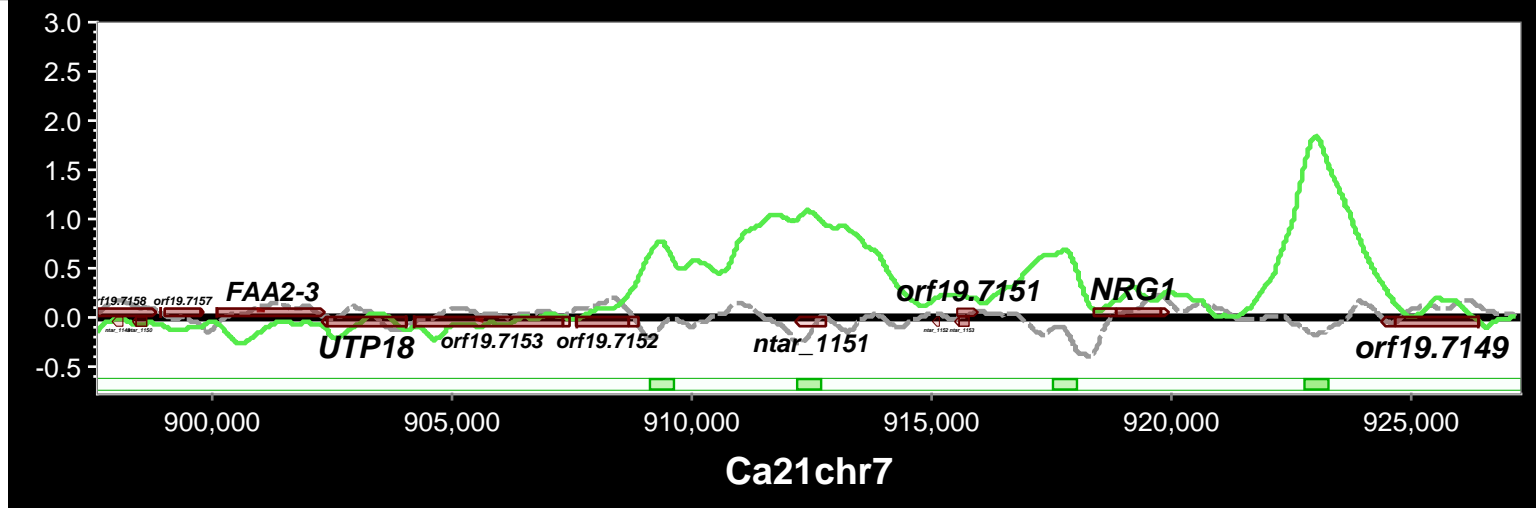

[1.073] Ca21chr7:477118-506801 [+] [orf19.6487, LDG3, orf19.6488, orf19.6484, FMP45]

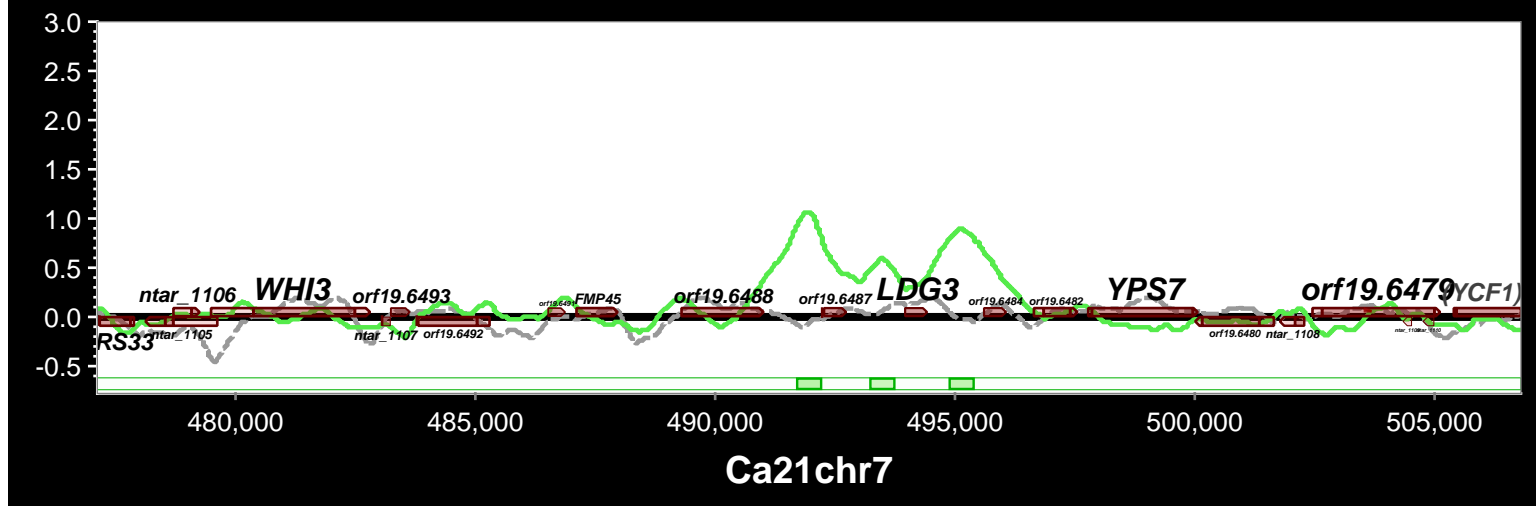

[1.07] Ca21chrR:1300628-1330311 [+] [orf19.3868, orf19.3869, ADE13, orf19.3871, orf19.3872]

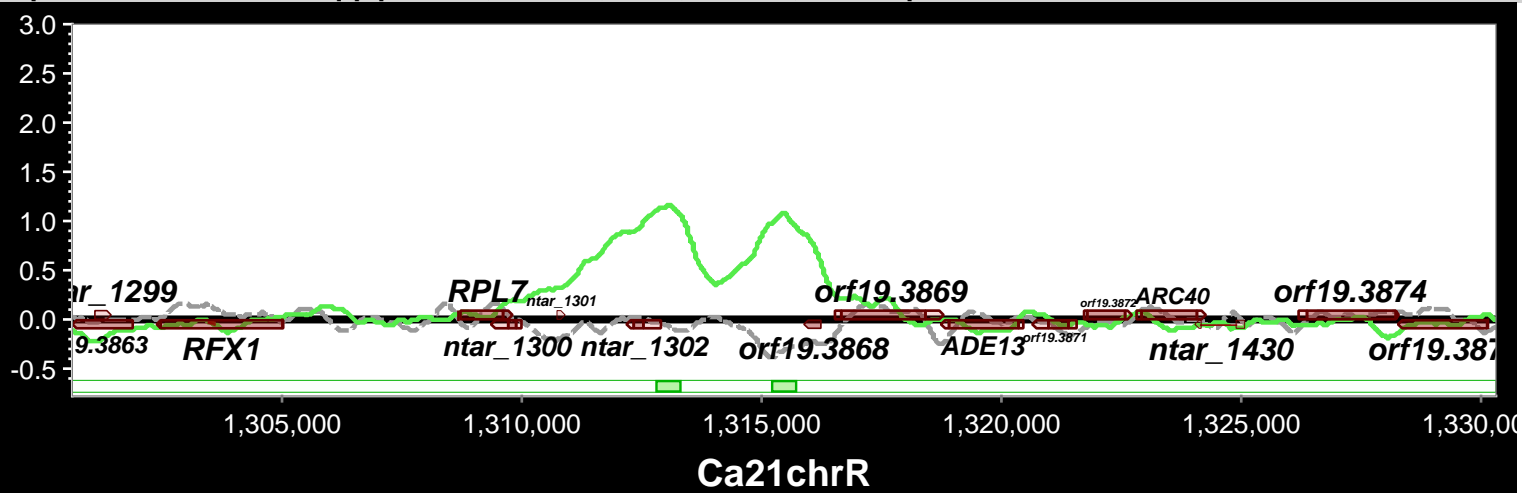

[1.058] Ca21chr3:718480-748163 [+] [orf19.344, BMT7, orf19.345, orf19.341, orf19.340]

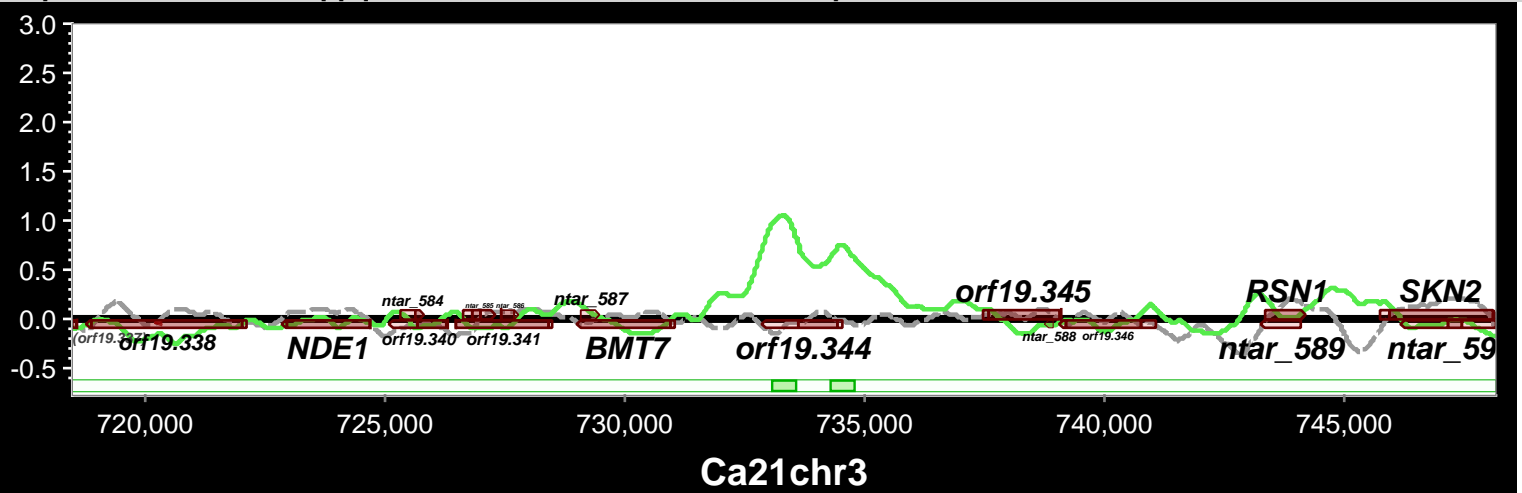

[1.057] Ca21chr5:639247-668930 [+] [MIG1, orf19.4321, DAP2, GRE3, orf19.4316]

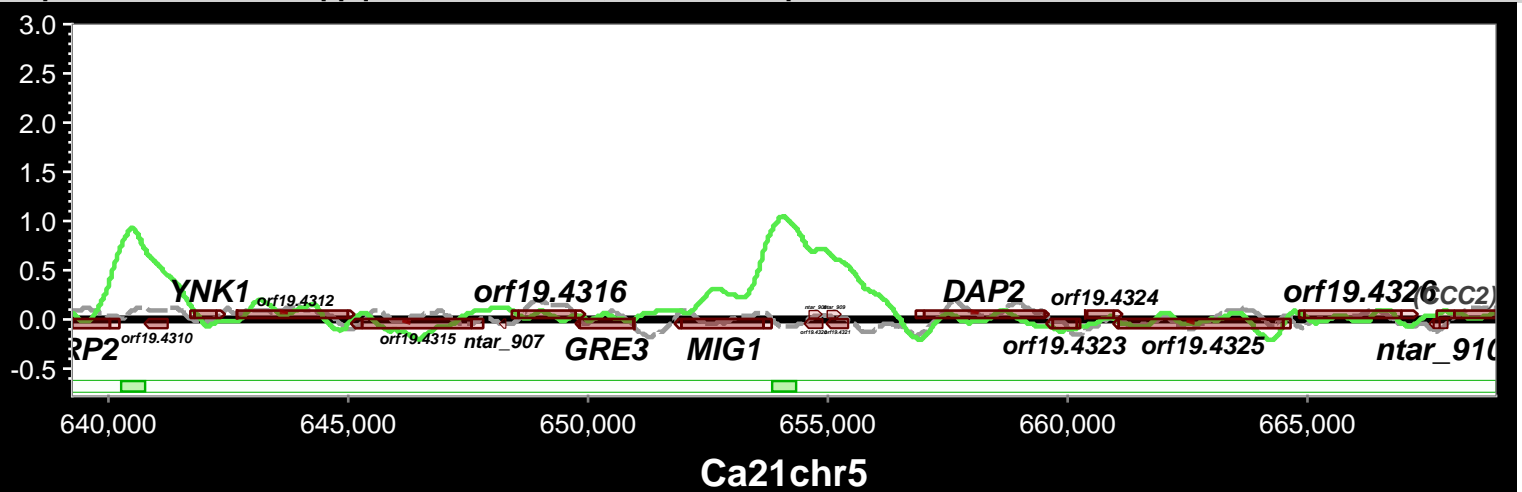

[1.053] Ca21chr1:2210213-2239896 [+] [orf19.4883, WOR1, orf19.4882, orf19.4880, MIR1]

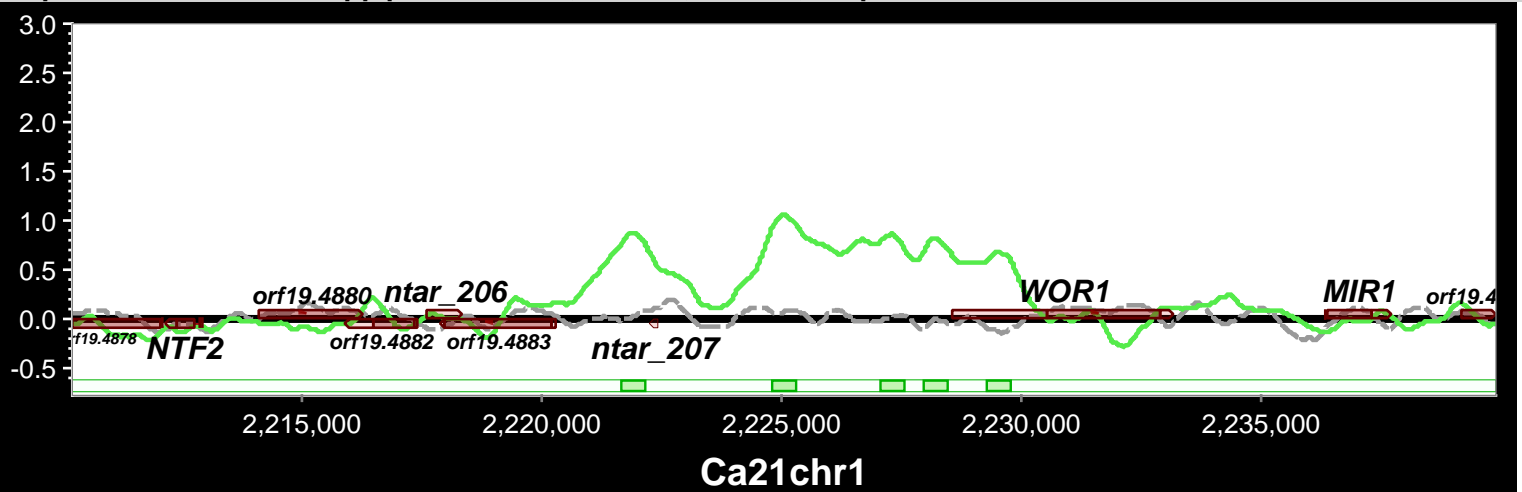



[1.053] Ca21chr6:751164-780847 [+] [orf19.5728, FGR17, orf19.5727, orf19.5730, orf19.5725]

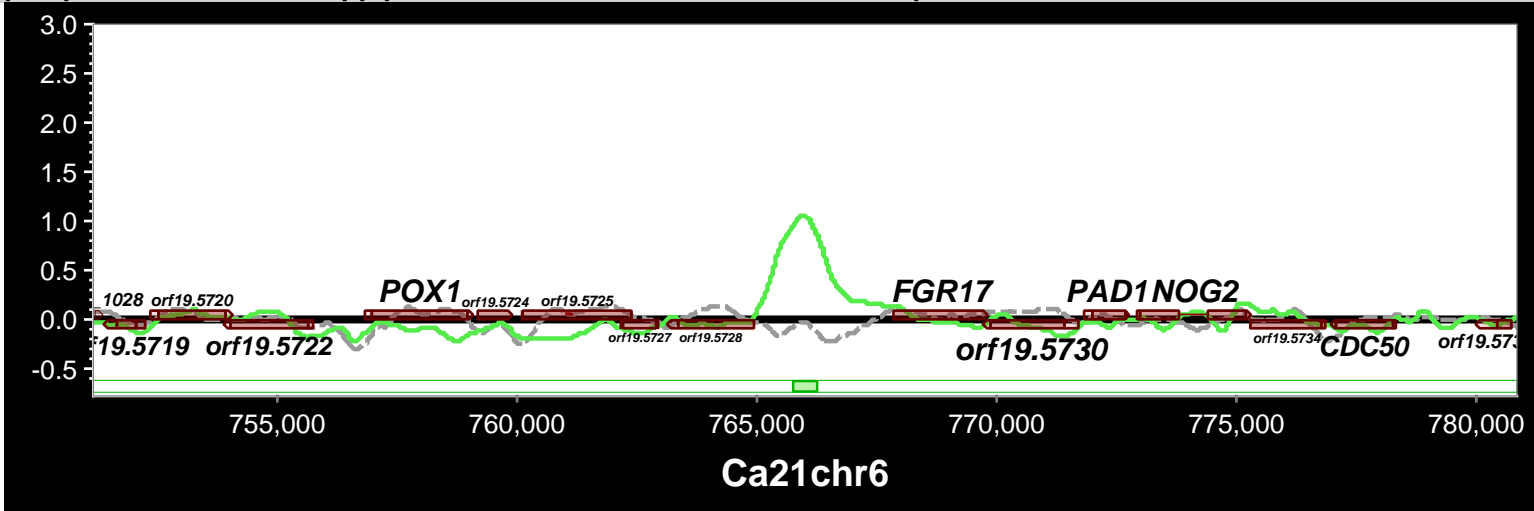

[1.051] Ca21chr2:2008191-2037874 [+] [SMM1, orf19.1363, orf19.1361, orf19.1360.1, orf19.1364]

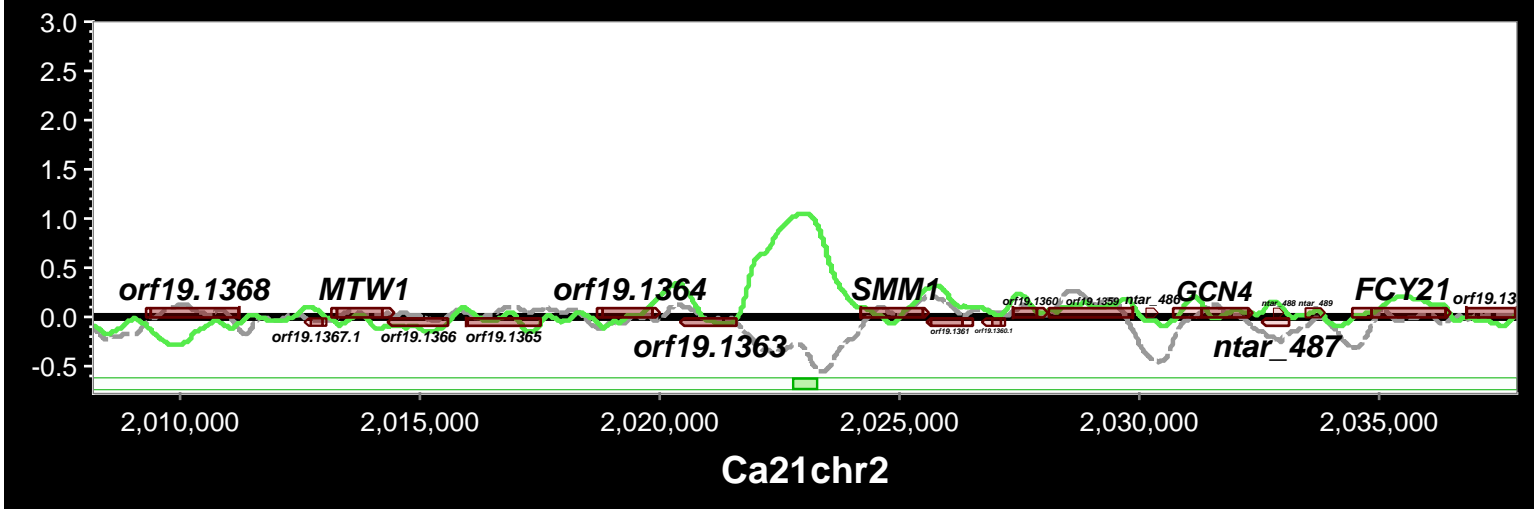

[1.046] Ca21chr1:13210-42893 [+] [RIM8, orf19.6090, LEU4, RPL16A, orf19.6084]

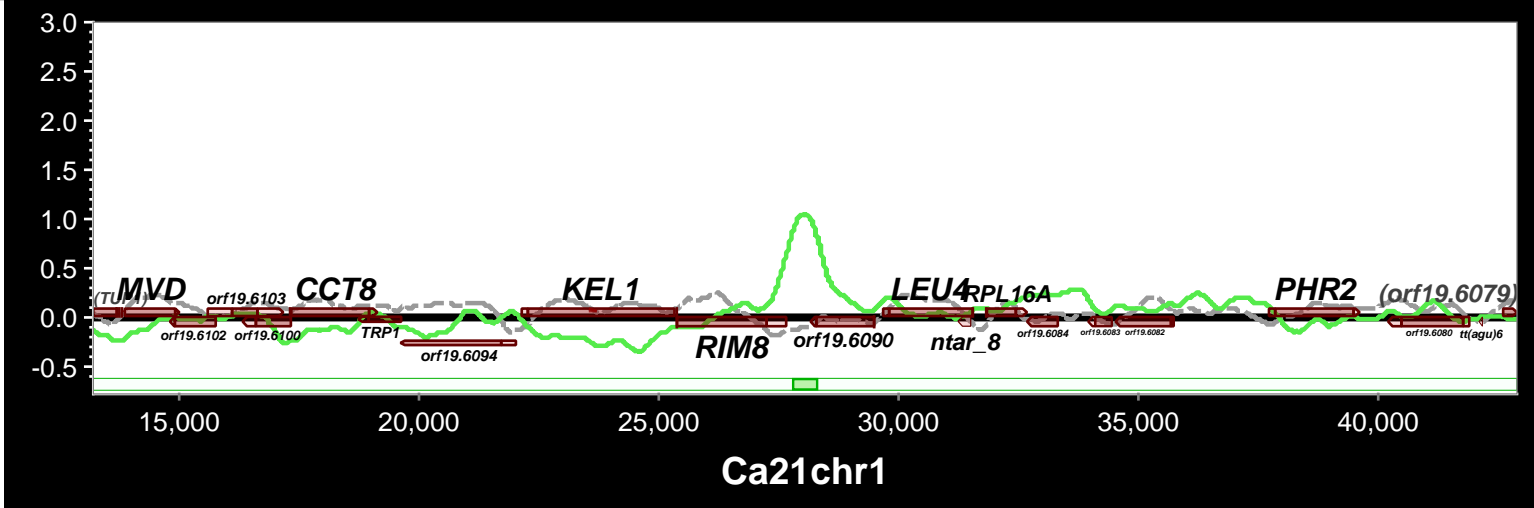

[1.046] Ca21chr3:1633793-1663476 [+] [orf19.6781, BMT1, MET8, PRO2, orf19.6778]

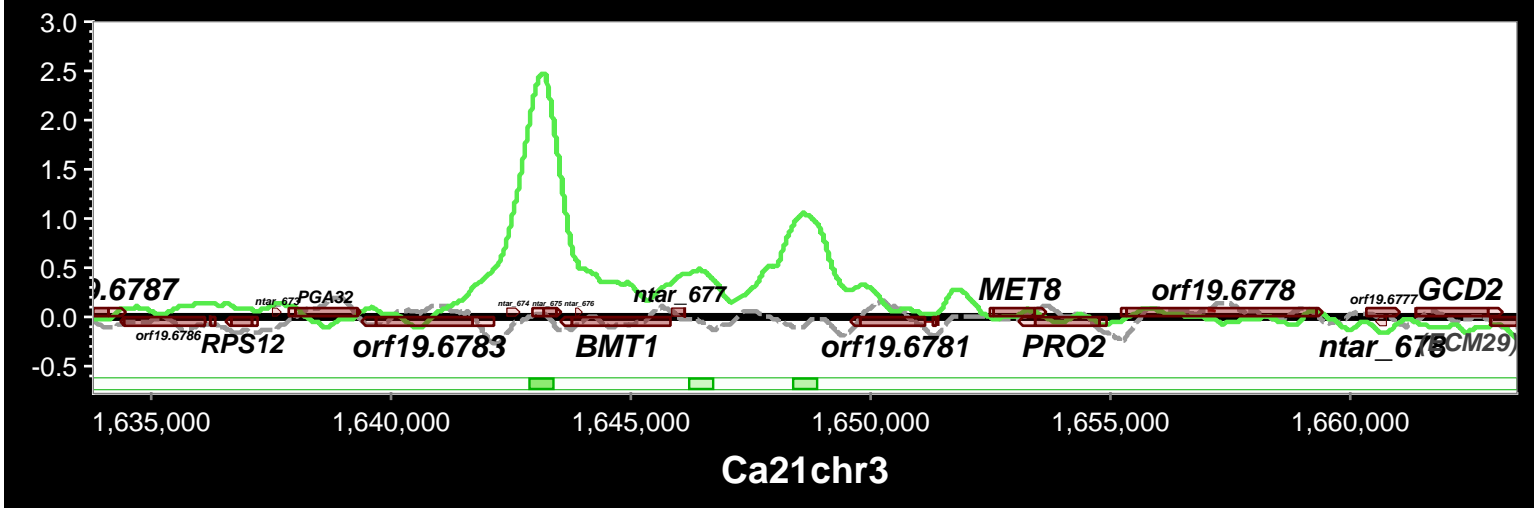

[1.046] Ca21chr6:693413-723096 [+] [orf19.5626, orf19.5625, ARP4, orf19.5627, GLC3]

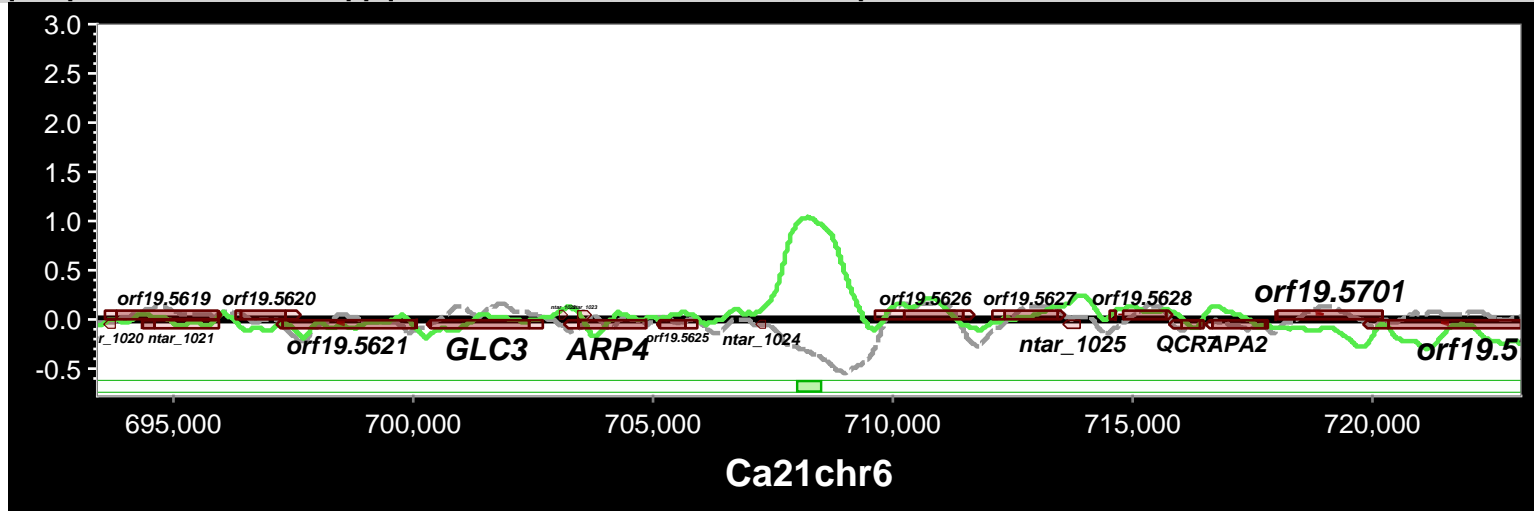

[1.045] Ca21chr5:908850-938533 [+] [orf19.3897, CHT2, orf19.3898, SDC1, orf19.3894]

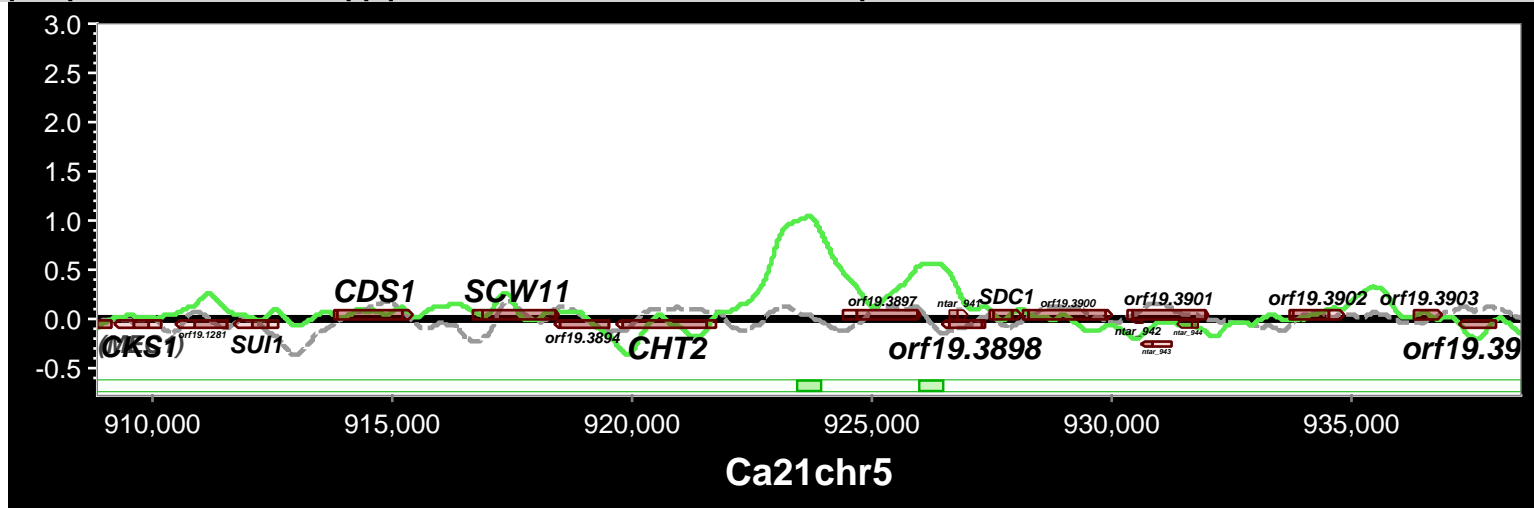

[1.032] Ca21chrR:1704610-1734293 [+] [EFG1, tG(GCC)1, orf19.609, orf19.612, ASF1]

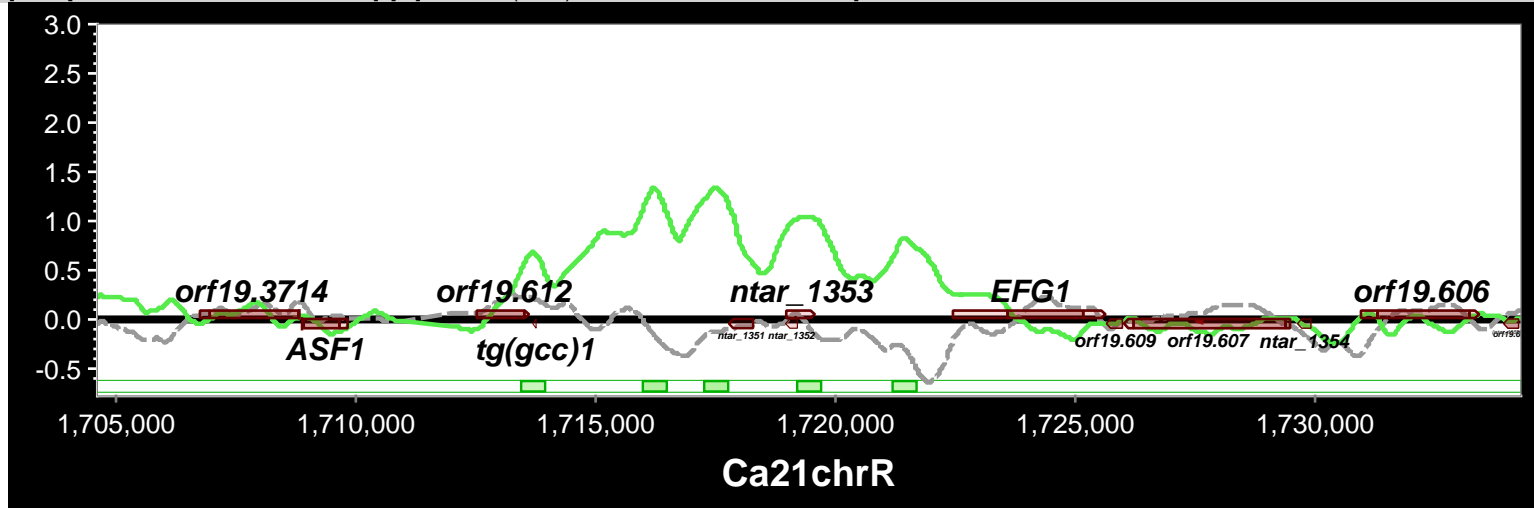

[1.027] Ca21chr1:424463-454146 [+] [HGT2, SHA3, orf19.3667, orf19.3666, orf19.3665]

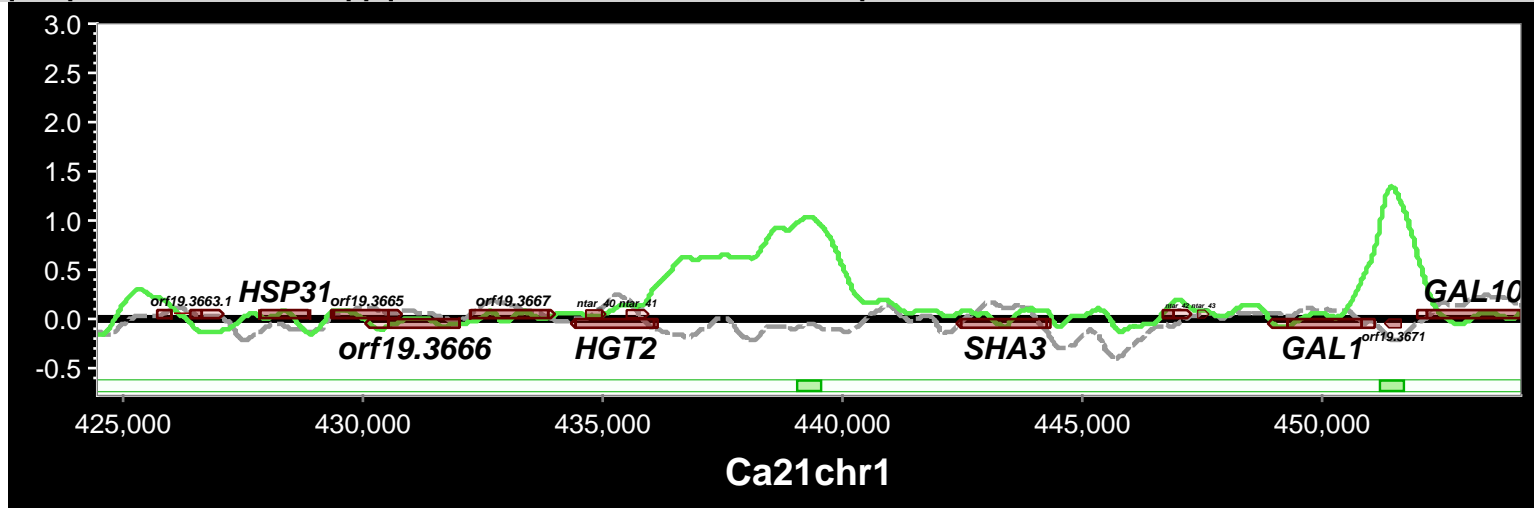

[1.024] Ca21chrR:966841-996524 [+] [RBR1, orf19.533, RBR2, orf19.530, orf19.529.1]

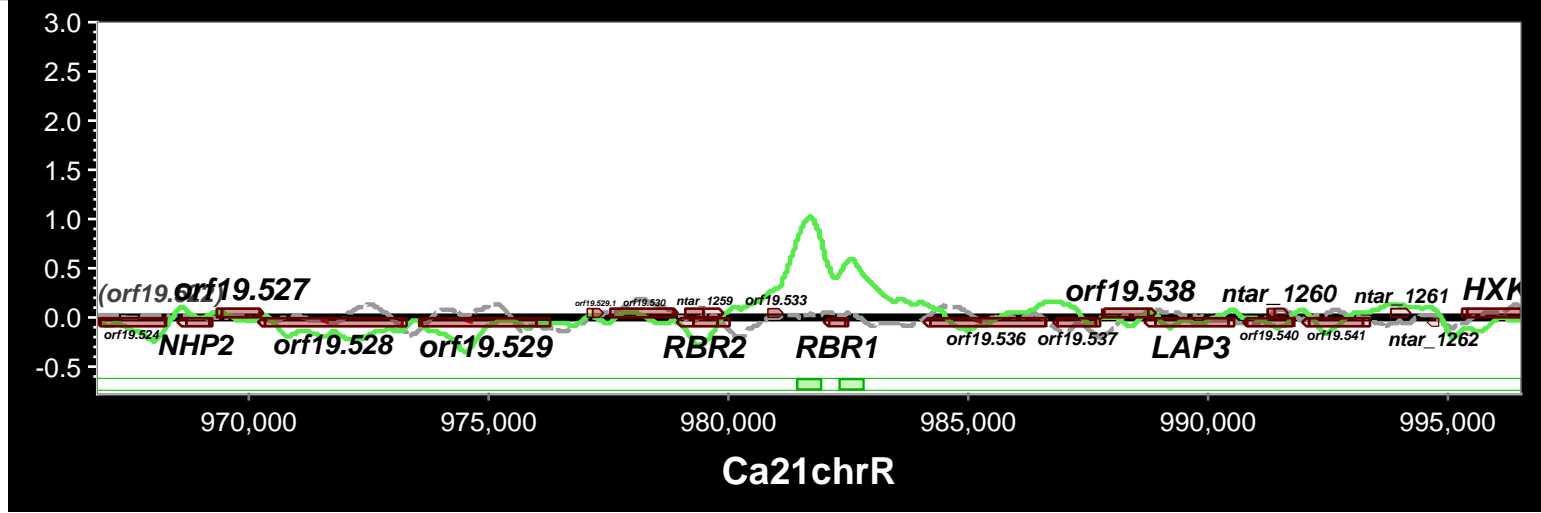

[1.013] Ca21chr2:1920606-1950289 [+] [orf19.1604, PMS1, orf19.1406, PHO13, orf19.1404]

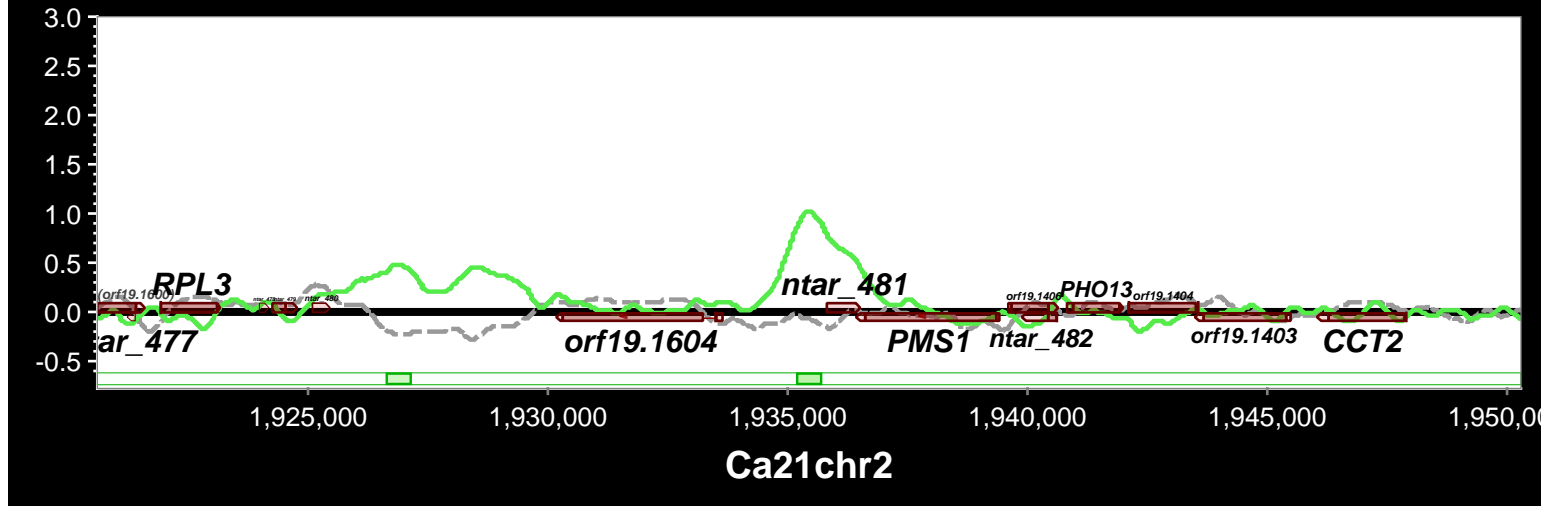

[1.006] Ca21chr1:1229468-1259151 [+] [PHO87, orf19.2455, orf19.2452, PGA45, orf19.2457]

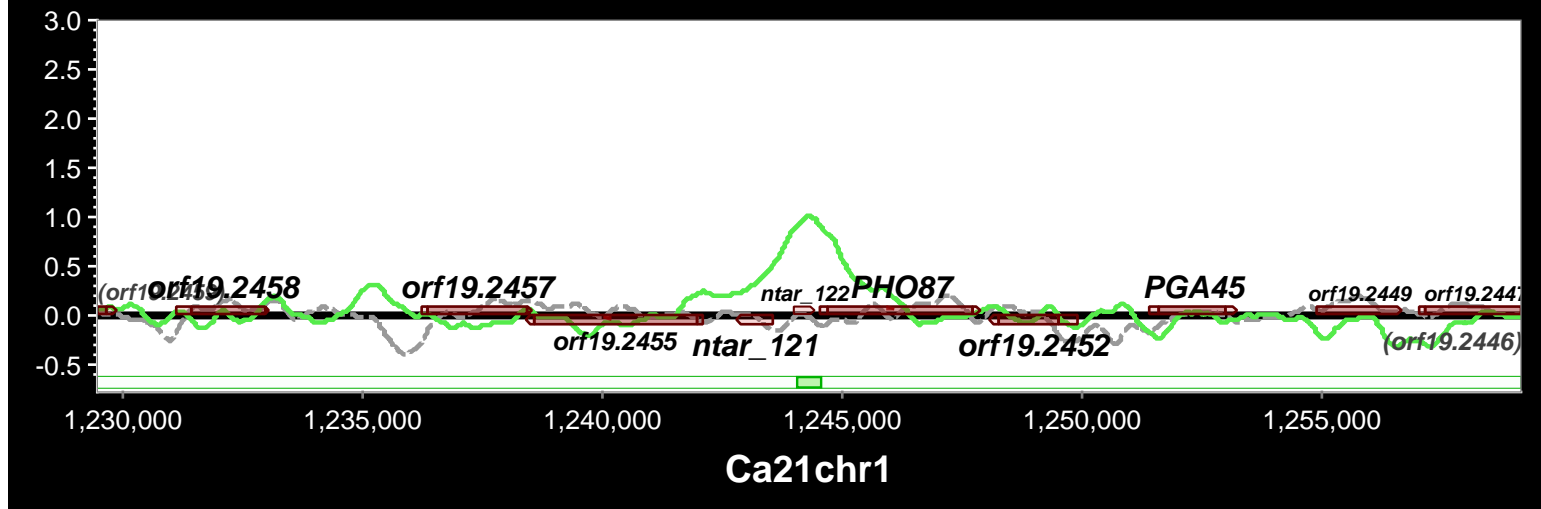

[1.002] Ca21chr3:1025517-1055200 [+] [orf19.5953, tK(CUU)2, orf19.5952, orf19.5954, FAS2]

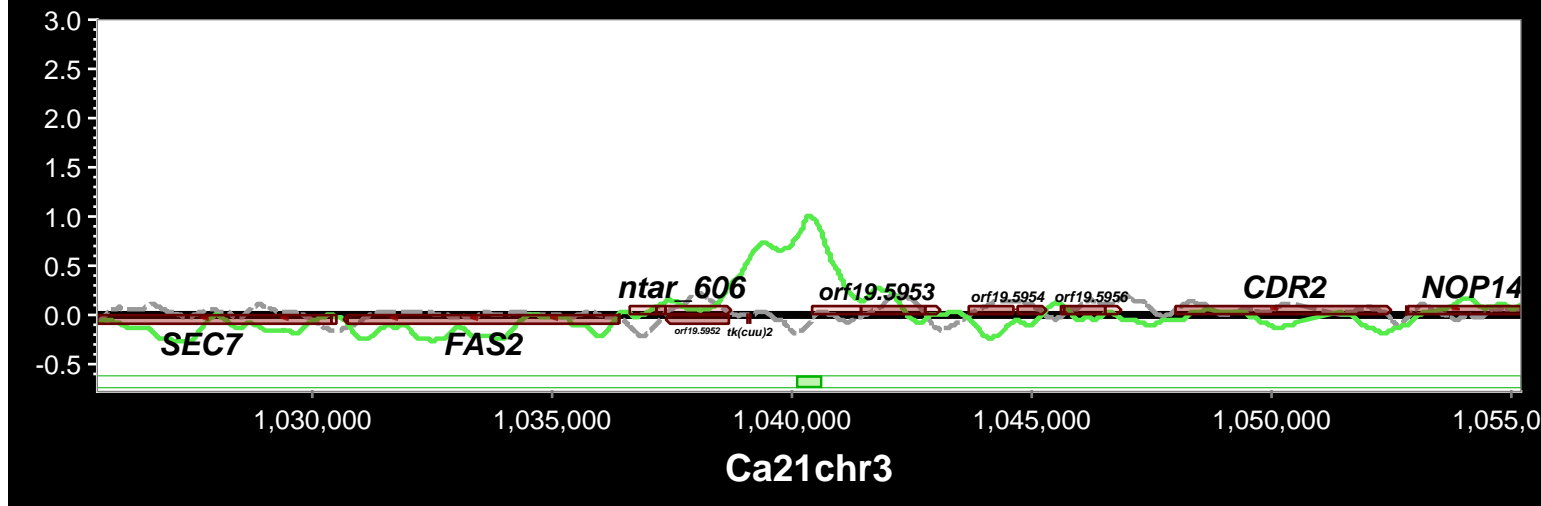

[0.997] Ca21chr6:948602-978285 [+] [FLO8, orf19.1095, orf19.1096, orf19.1092, ALS2]

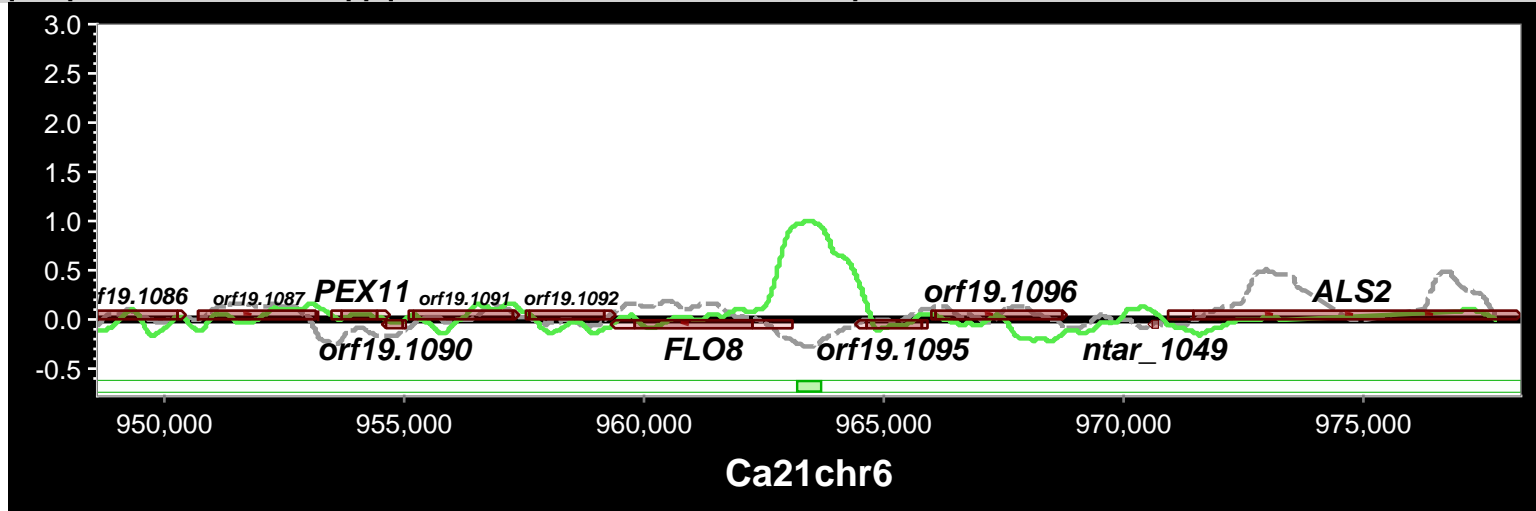

[0.996] Ca21chr1:1073334-1103017 [+] [orf19.450, GAT2, orf19.449, orf19.448, orf19.446.2]

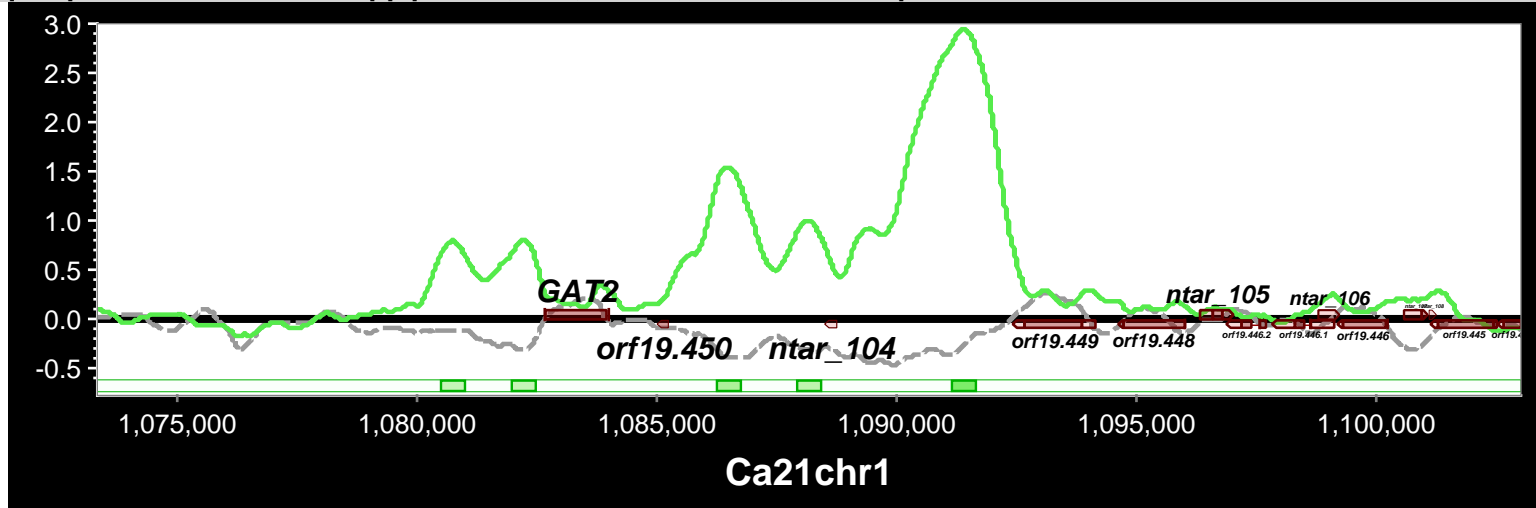

[0.992] Ca21chr6:75507-105190 [+] [FET3, orf19.4210, FET99, orf19.4209, RAD52]

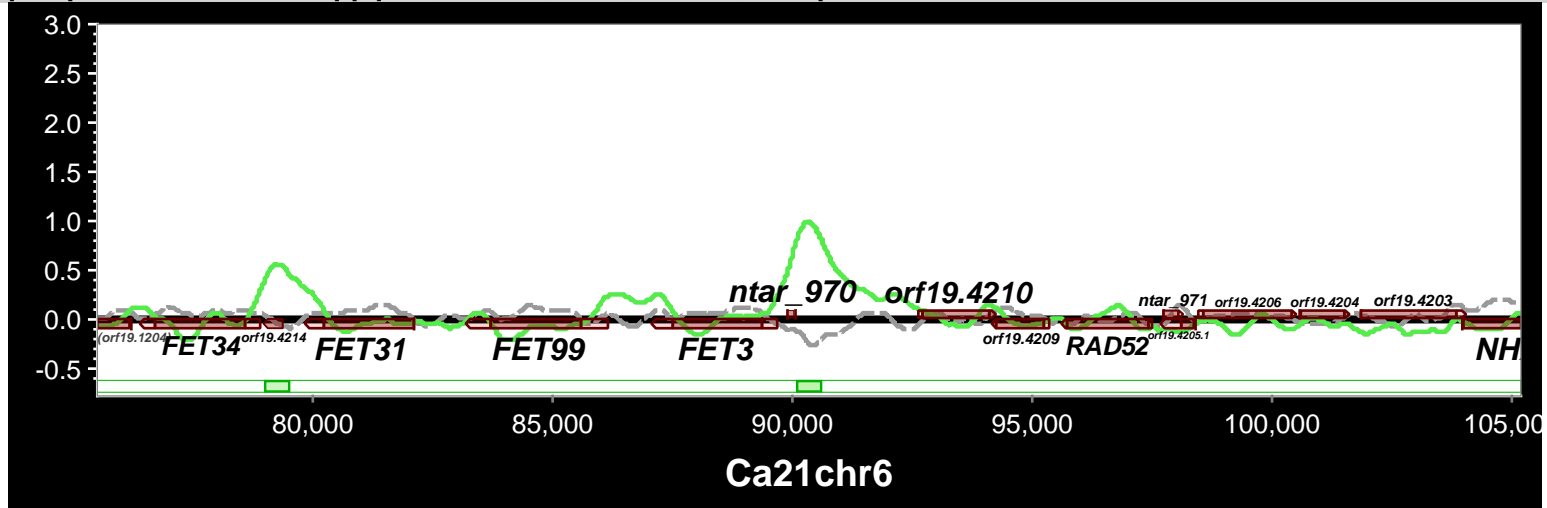

[0.986] Ca21chr3:1094951-1124634 [+] [orf19.5991, orf19.5989, orf19.5987, THI4, WOR2]

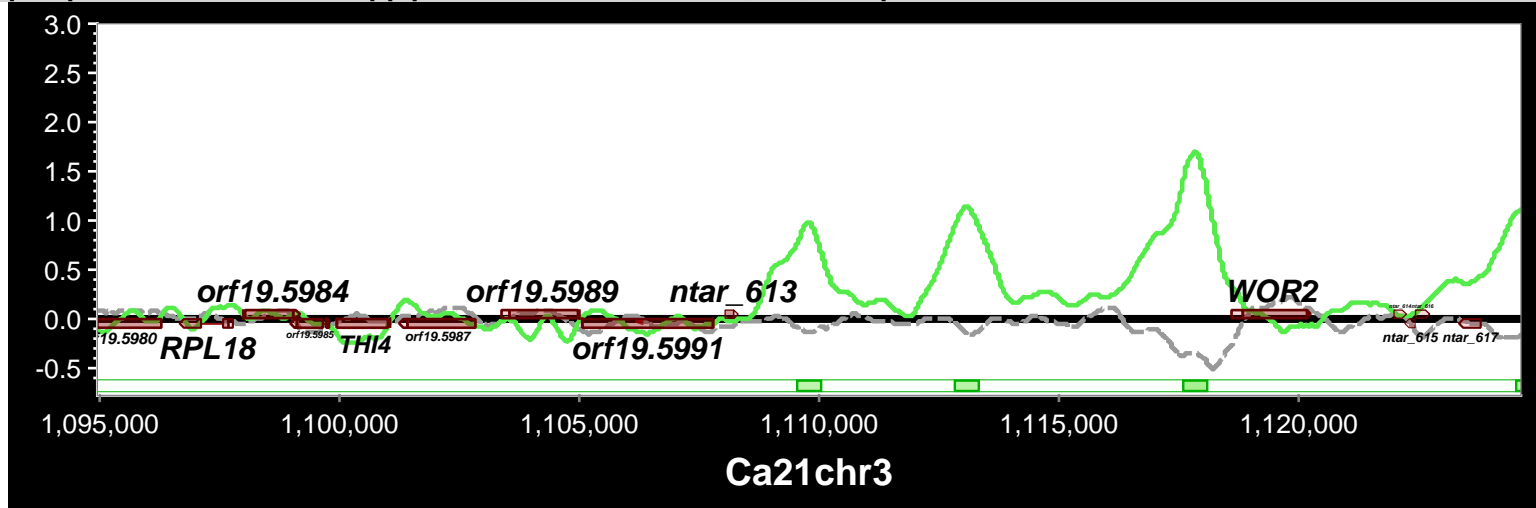

[0.969] Ca21chr2:148982-178665 [+] [HGT7, orf19.2024, orf19.2025, orf19.2026, HGT8]

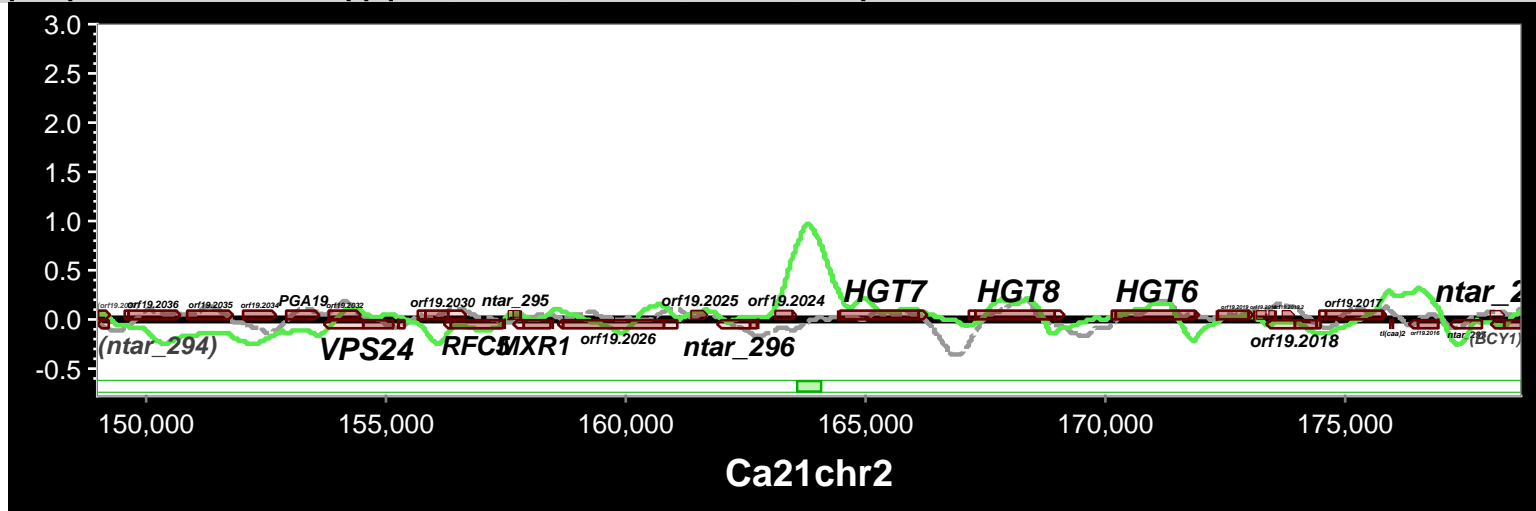

[0.969] Ca21chr4:1030591-1060274 [+] [CSR1, orf19.3793, AGP3, orf19.3792, FGR10]

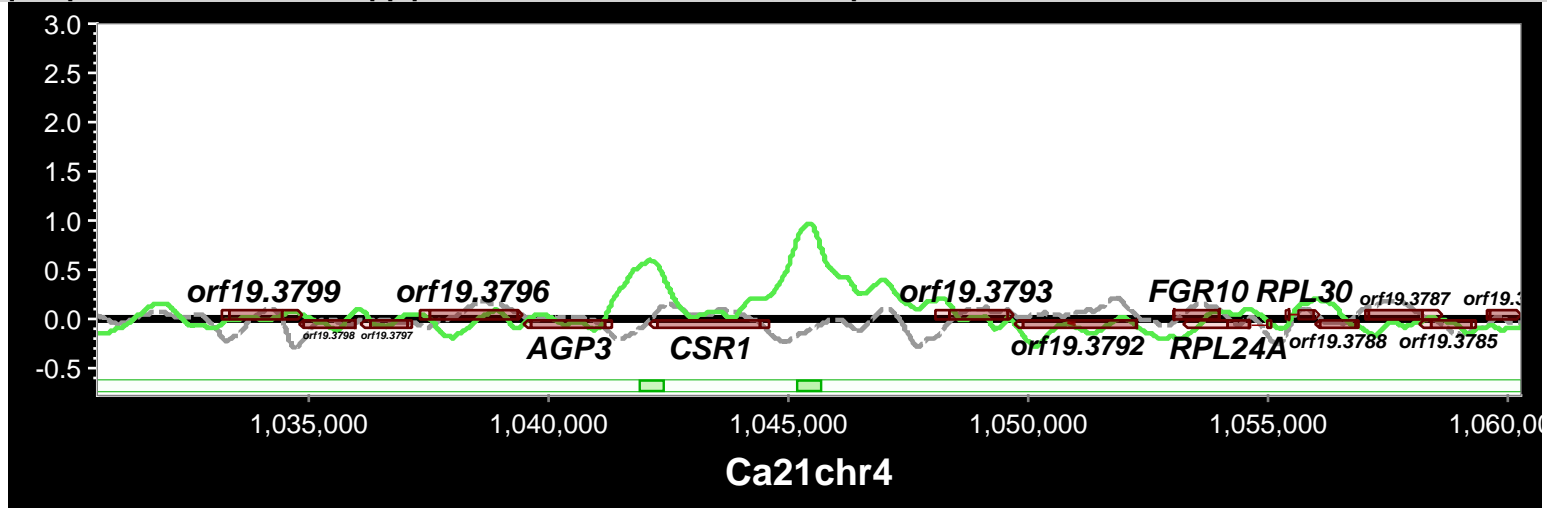

[0.961] Ca21chr1:997558-1027241 [+] [SAP7, MRPL37, orf19.757, YBN5, orf19.757.1]

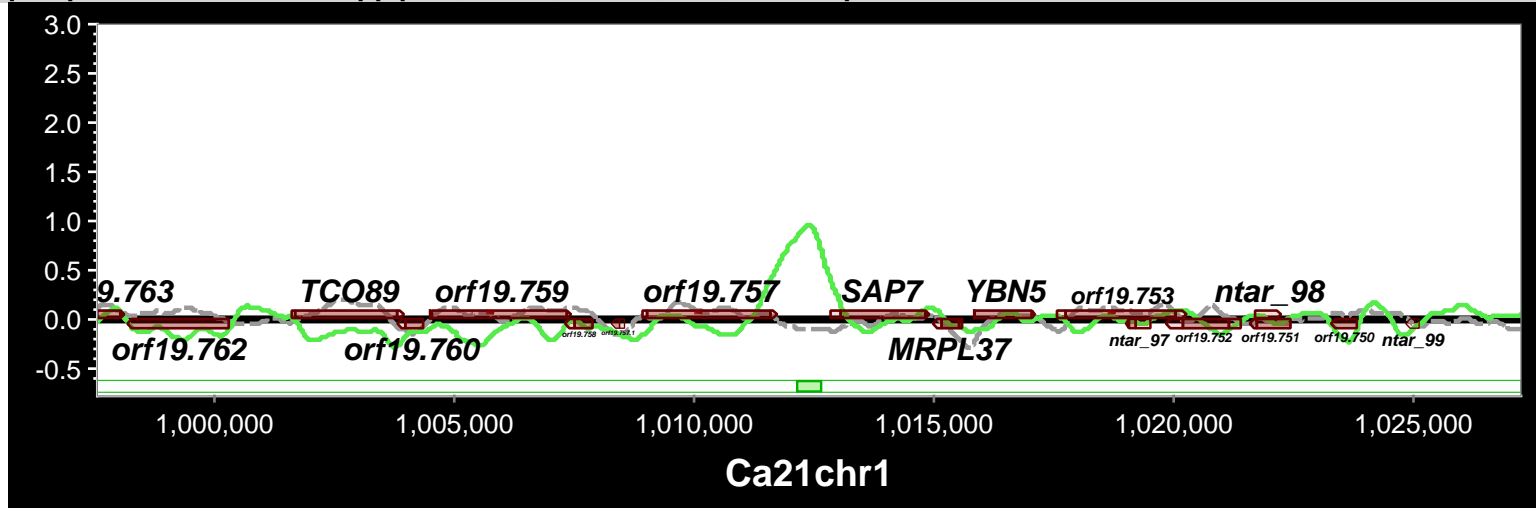

[0.956] Ca21chr3:1460610-1490293 [+] [AAF1, ECM15, th(GUG)3, orf19.7437, GLG2]

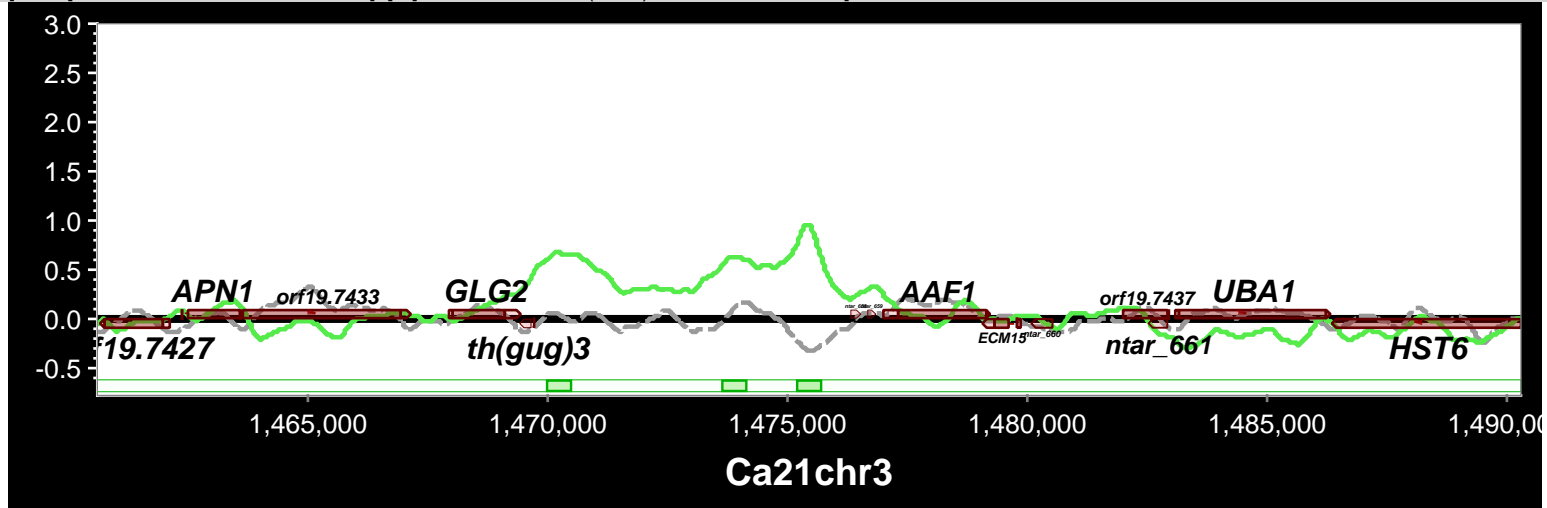

[0.952] Ca21chr3:1199625-1229308 [+] [orf19.6983, orf19.6982, orf19.6981, orf19.6980, orf19.6984]

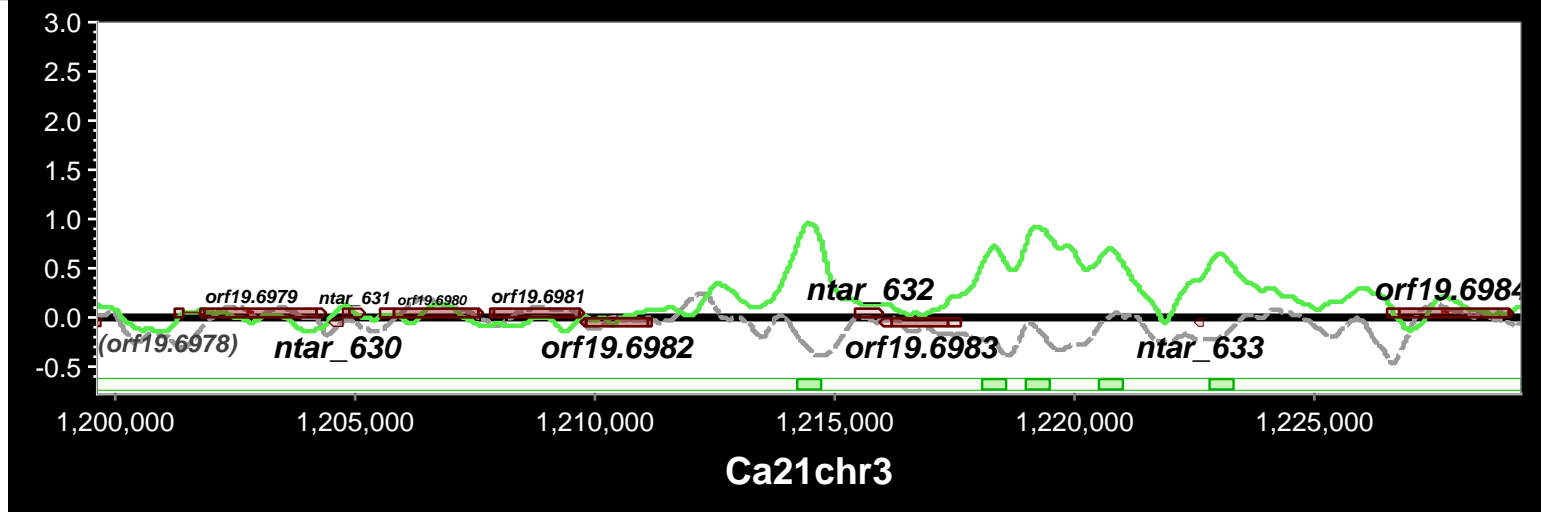

[0.941] Ca21chr4:528207-557890 [+] [SUL2, orf19.2737, orf19.2739, orf19.2736, SEN2]

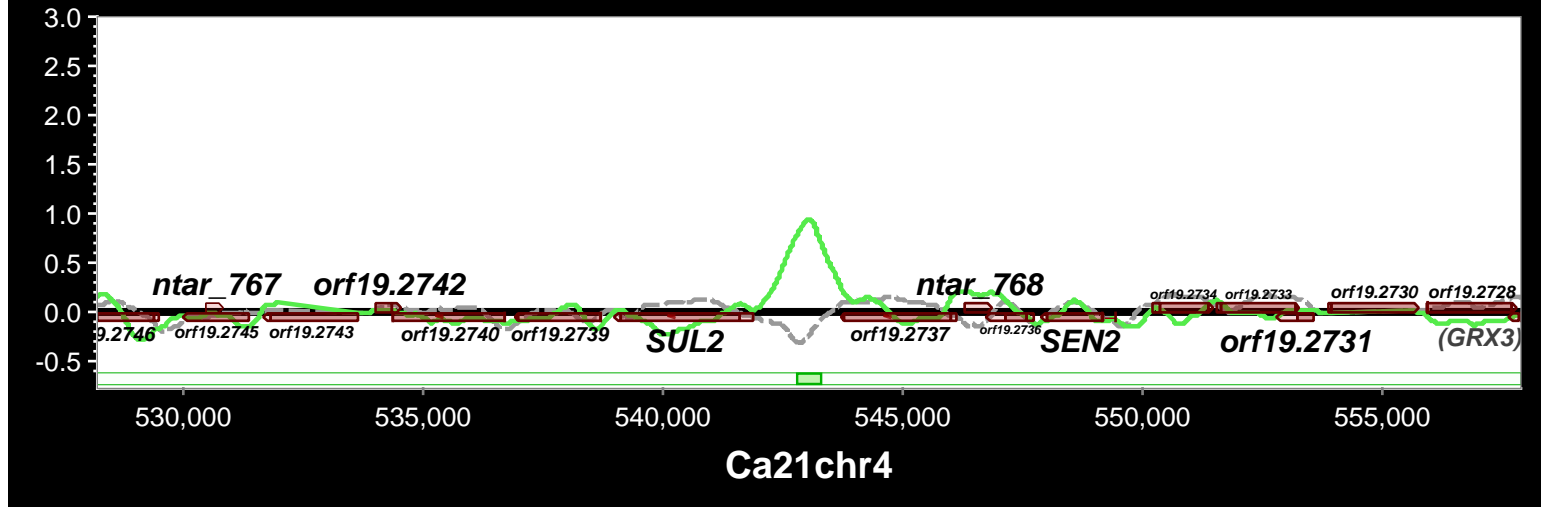

[0.94] Ca21chr3:1744535-1774218 [+] [orf19.6715, orf19.6713, ABD1, orf19.6712, orf19.6717]

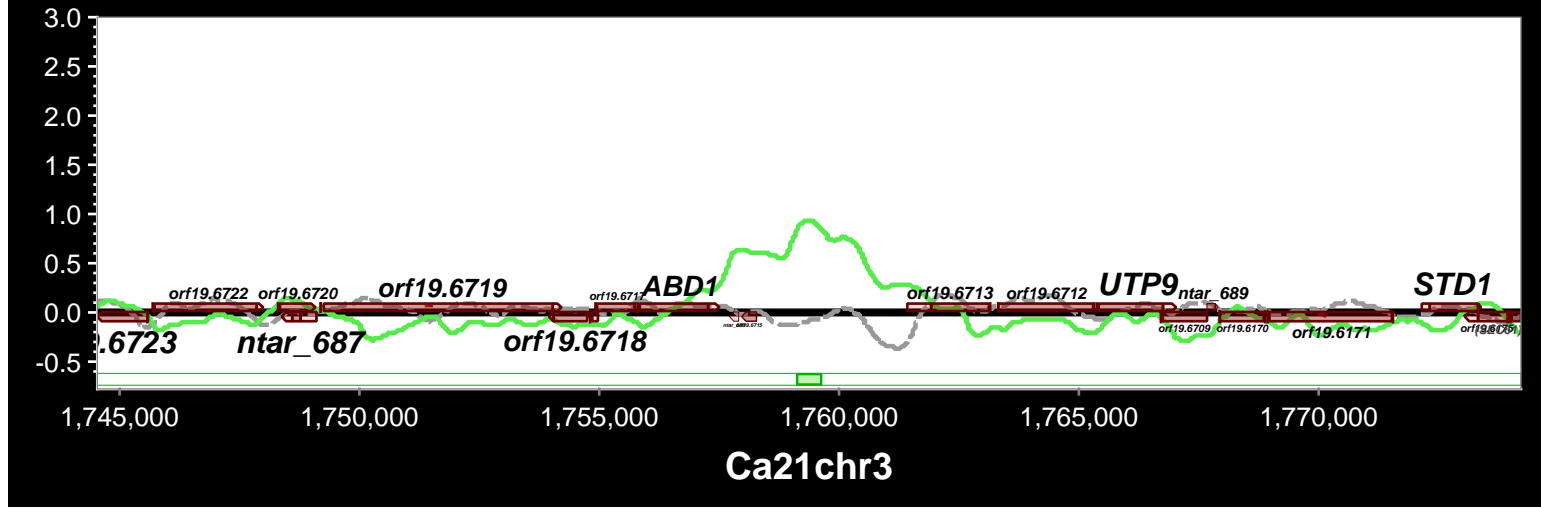

[0.936] Ca21chr2:1131976-1161659 [+] [tS(AGA)4, orf19.6874, orf19.6873.1, RPS8A, VPS35]

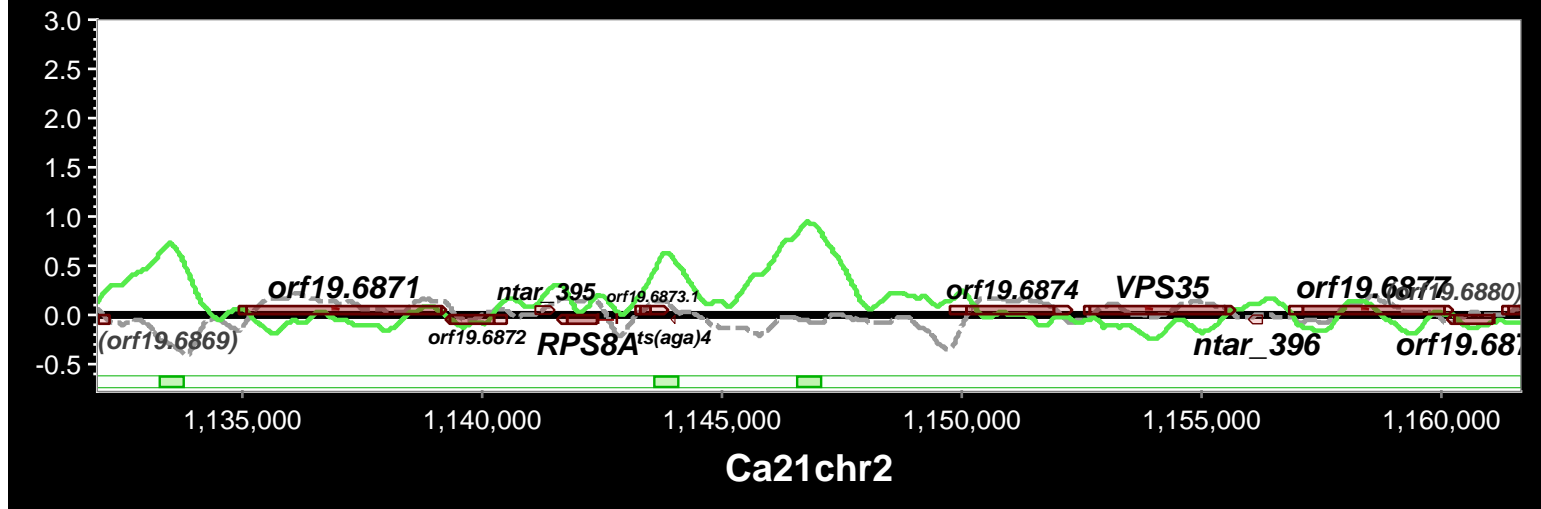

[0.932] Ca21chr5:99317-129000 [+] [AGA1, orf19.934, orf19.933, orf19.936, orf19.932]

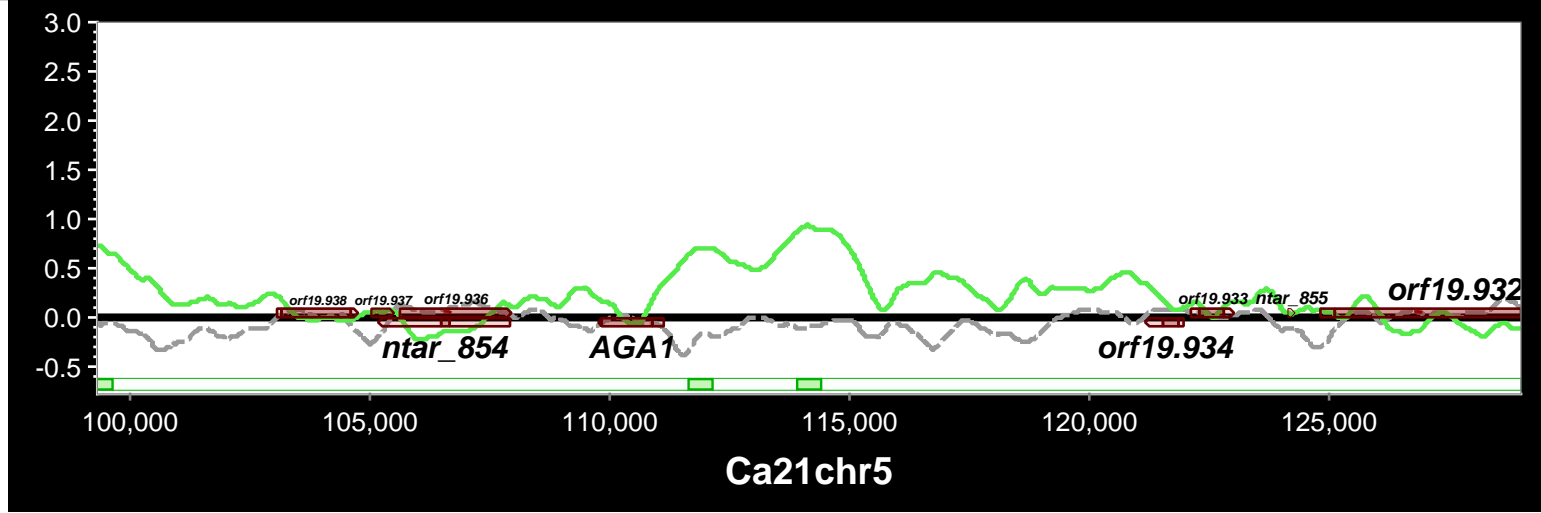

[0.931] Ca21chr1:2896110-2925793 [+] [STP2, orf19.4960, orf19.4962, orf19.4963, orf19.4959]

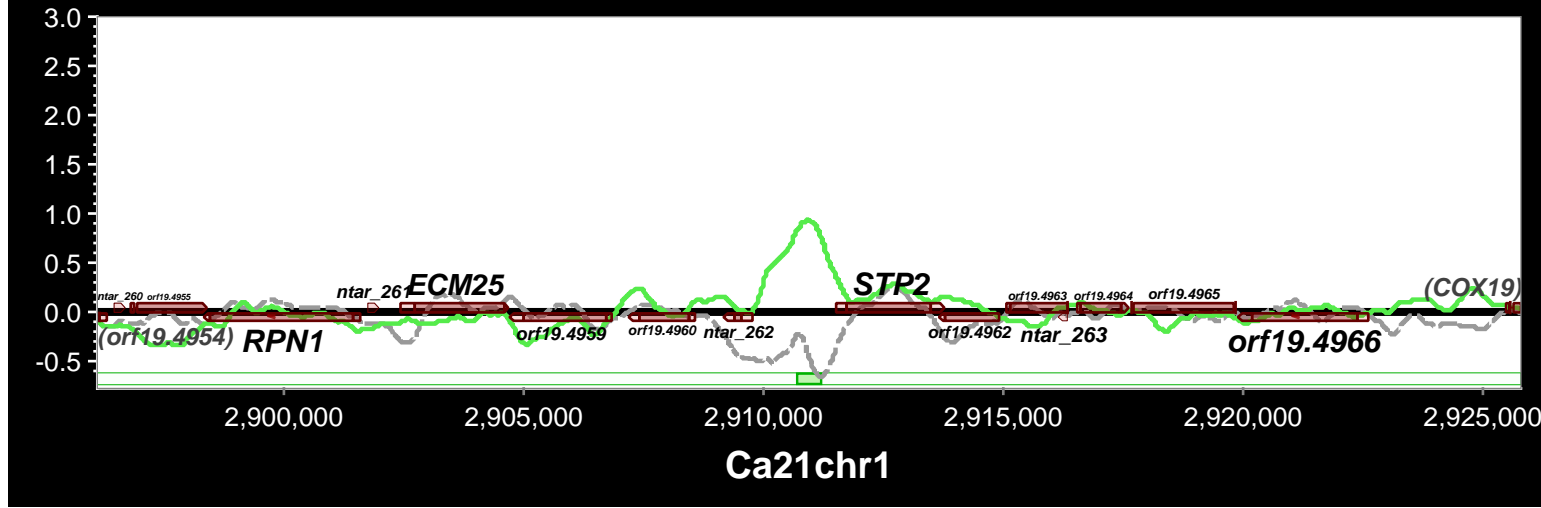

[0.93] Ca21chr1:2333611-2363294 [+] [orf19.1831, FCY23, orf19.1830, orf19.1833, orf19.1005]

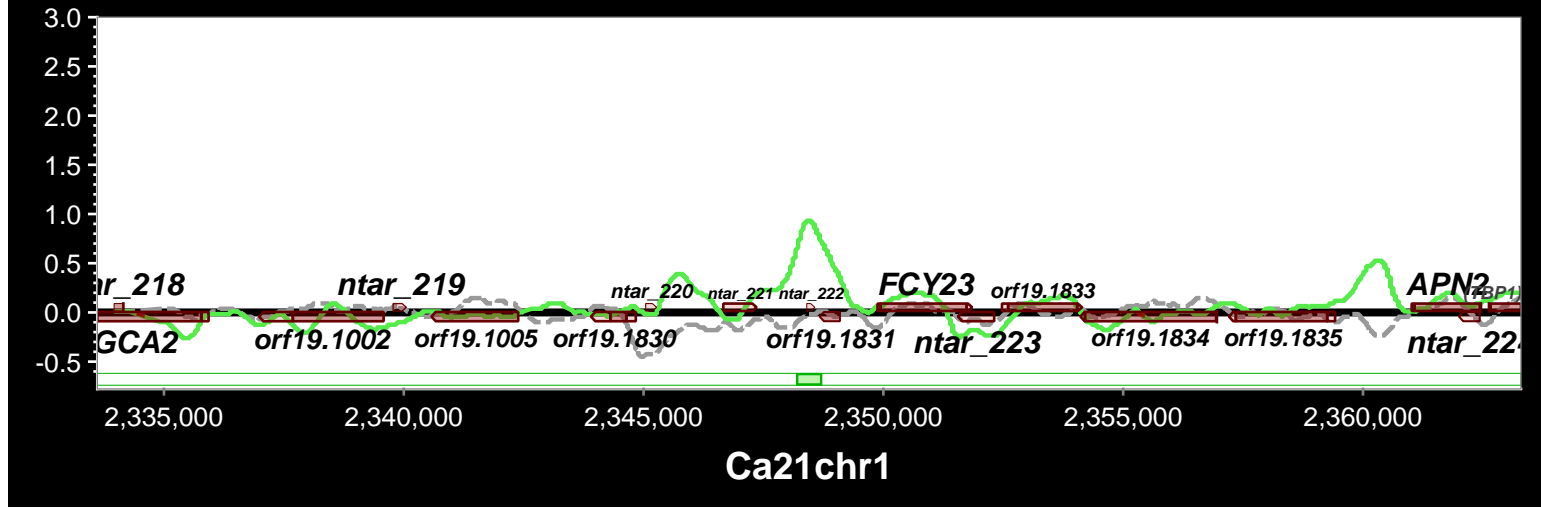

[0.928] Ca21chrR:577798-607481 [+] [orf19.2822, RFG1, orf19.2821, orf19.2820, orf19.2819]

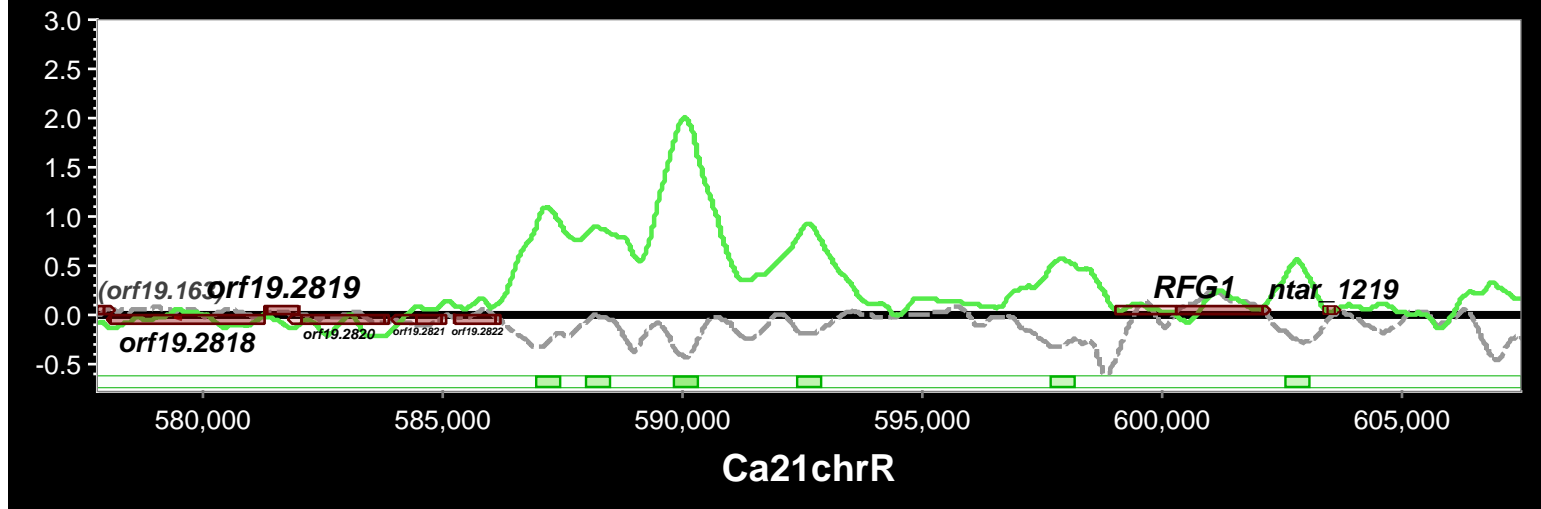

[0.927] Ca21chr6:202133-231816 [+] [FAD2, orf19.117, orf19.115, orf19.119, orf19.120]

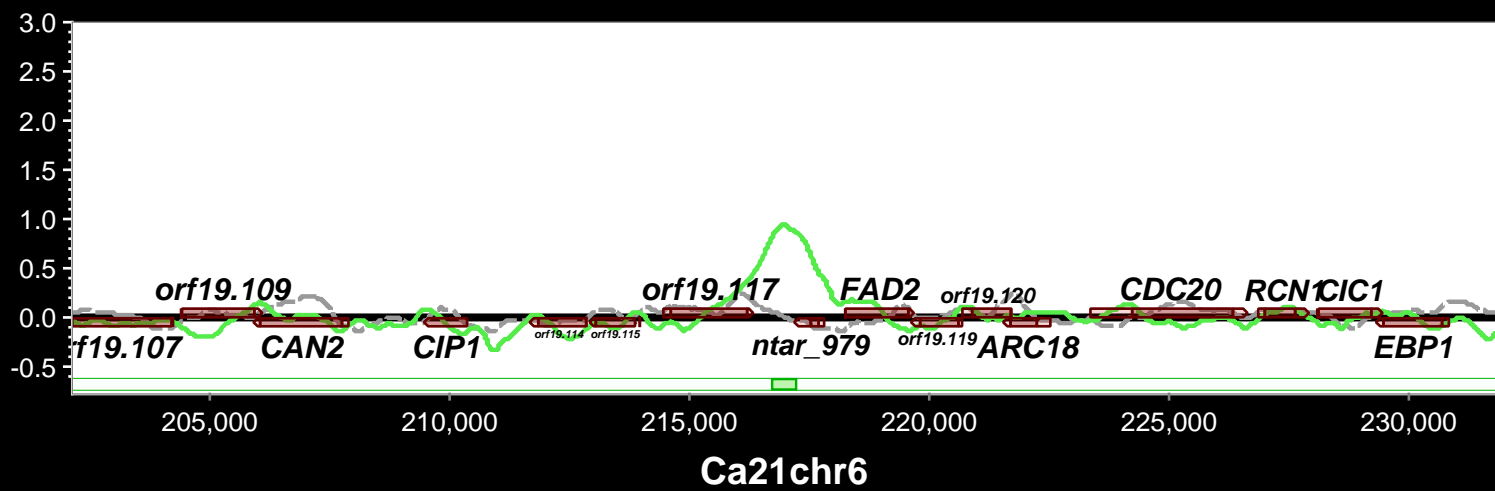

[0.923] Ca21chr5:625673-655356 [+] [GRP2, orf19.4310, YNK1, orf19.4312, HSL1]

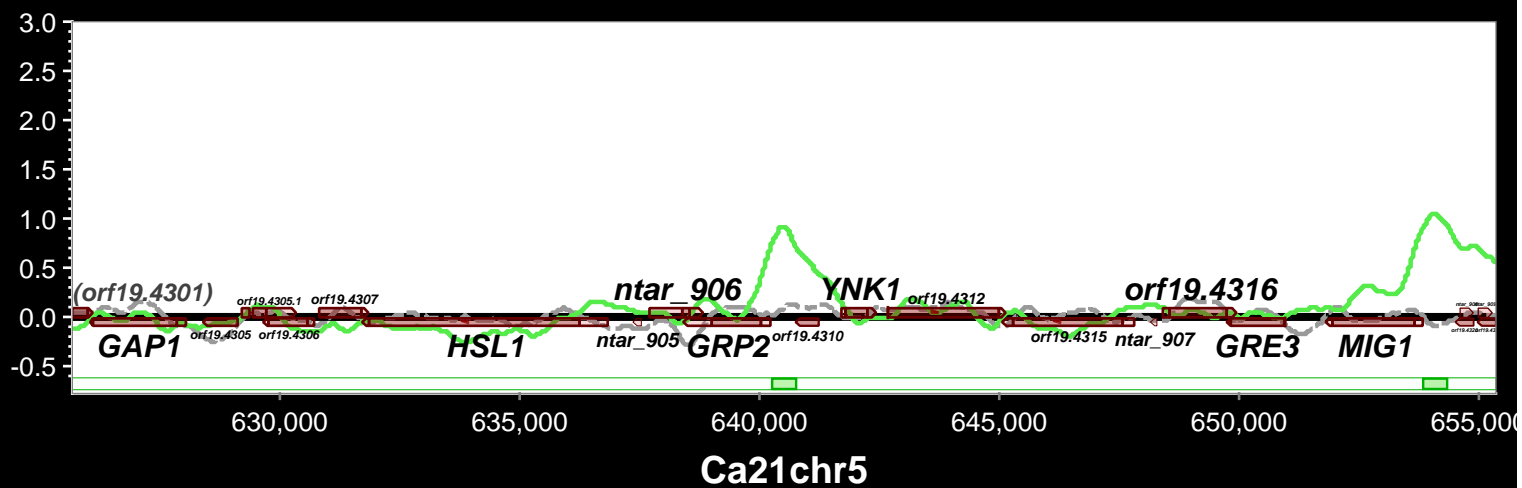

[0.917] Ca21chr3:1204392-1234075 [+] [orf19.6983, orf19.6984, orf19.6982, TEA1, orf19.6981]

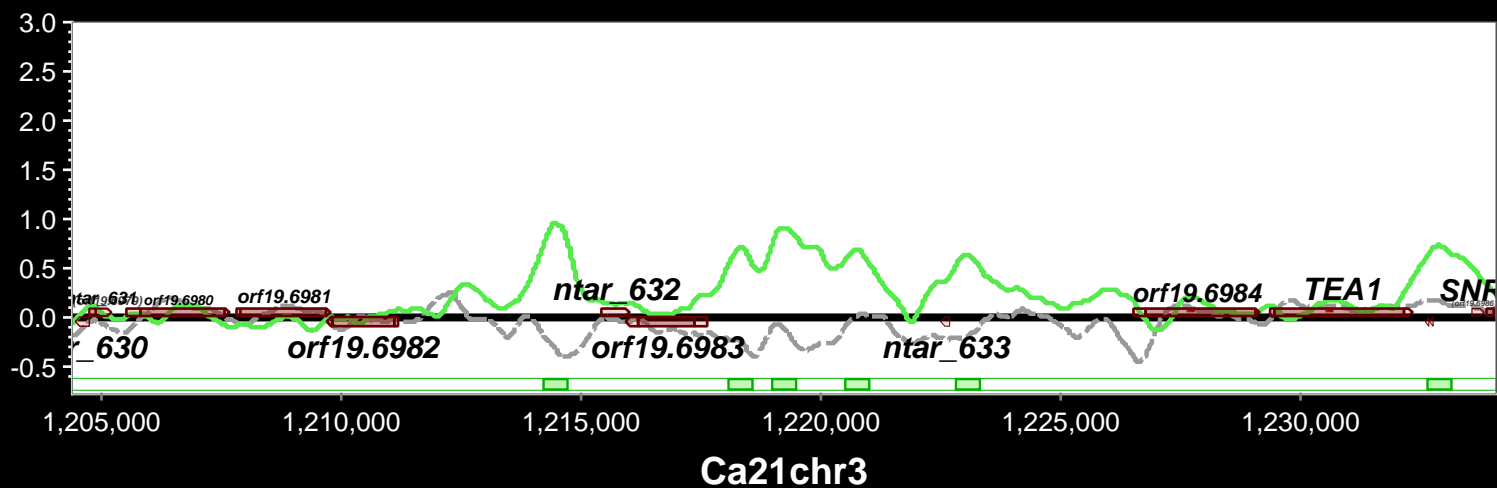

[0.913] Ca21chr7:591127-620810 [+] [PRX1, NIK1, LIP5, POL3, ERG5]

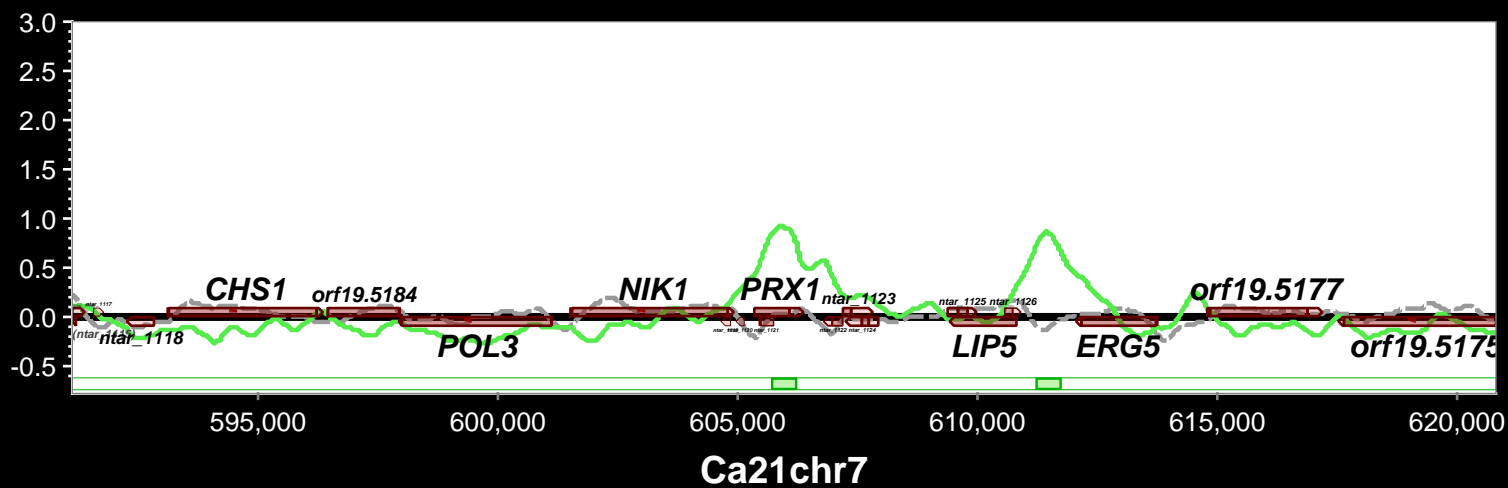



[0.912] Ca21chr7:168870-198553 [+] [orf19.7027, MCM1, orf19.7024, orf19.7023, orf19.7022]

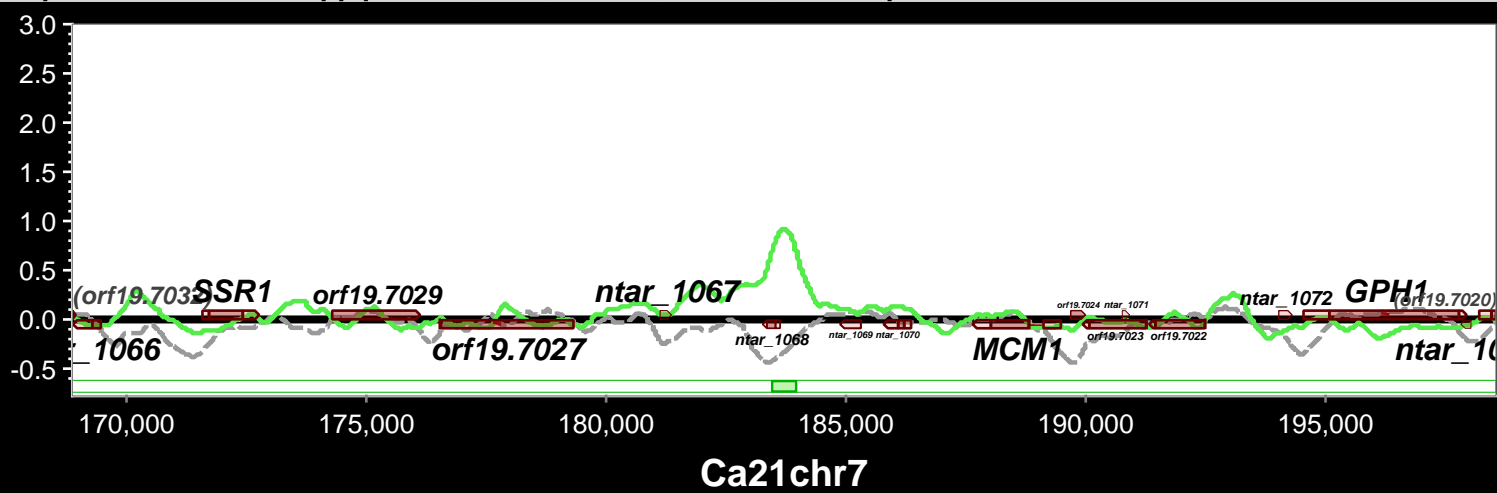

[0.911] Ca21chr2:813838-843521 [+] [SCH9, orf19.828, RPL39, orf19.831, orf19.827]

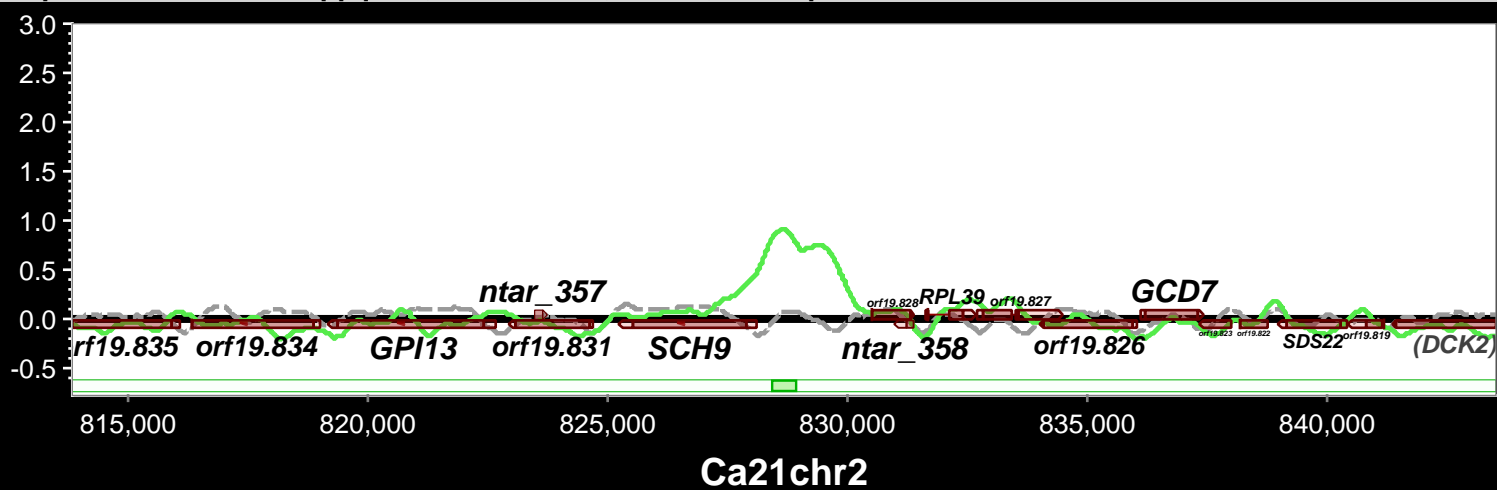

[0.905] Ca21chr1:803155-832838 [+] [orf19.4459, orf19.4461, orf19.4463, BNI4, SEN15]

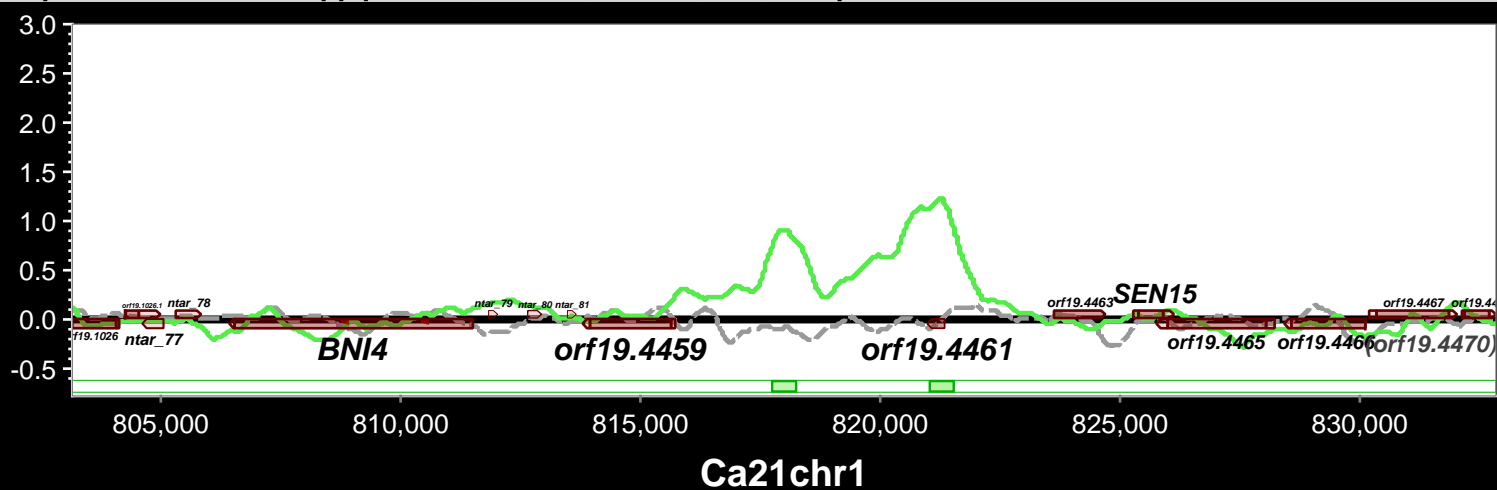

[0.904] Ca21chr1:1153563-1183246 [+] [tN(GUU)1, tN(GUU)2, tT(AGU)1, GSL1, orf19.410.3]

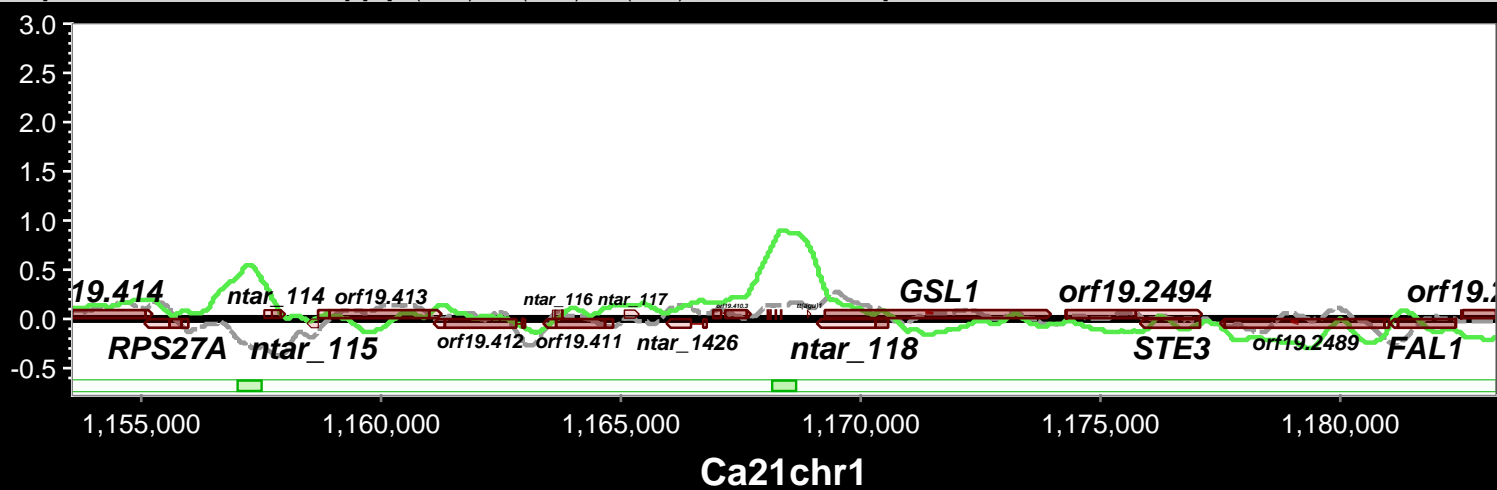

[0.901] Ca21chr1:521734-551417 [+] [tR(UCU)4, orf19.2943.5, DIP5, PUT4, HNM4]

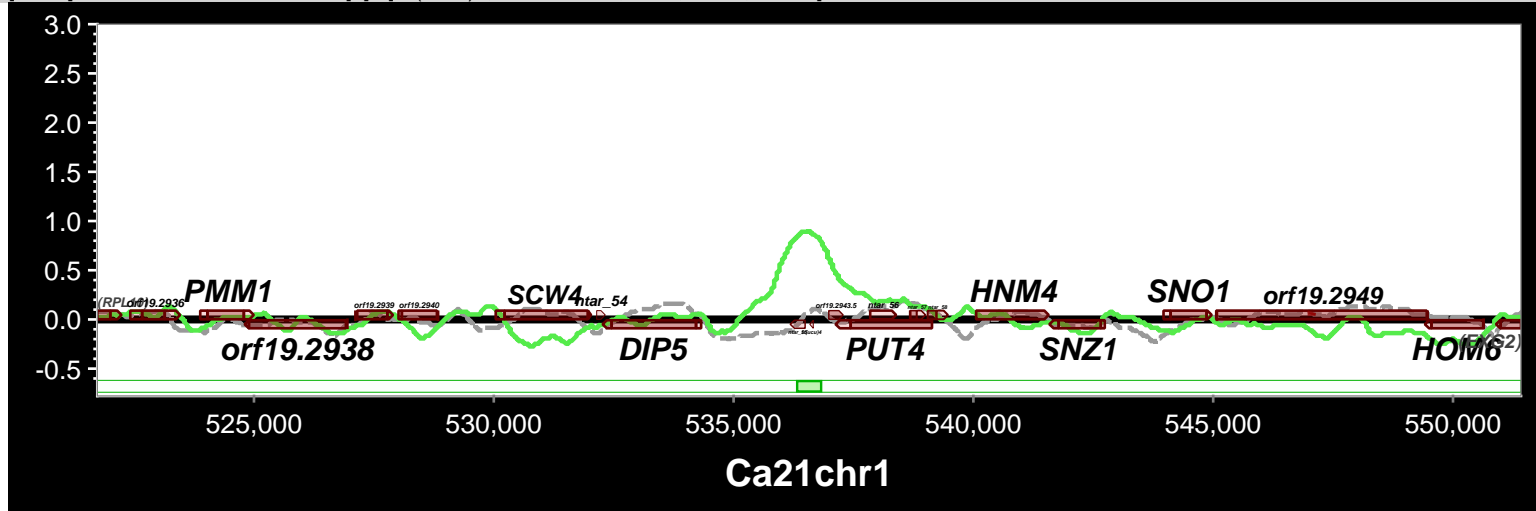

[0.901] Ca21chr4:1508122-1537805 [+] [CZF1, orf19.3128, CCT6, orf19.3125, orf19.3129]

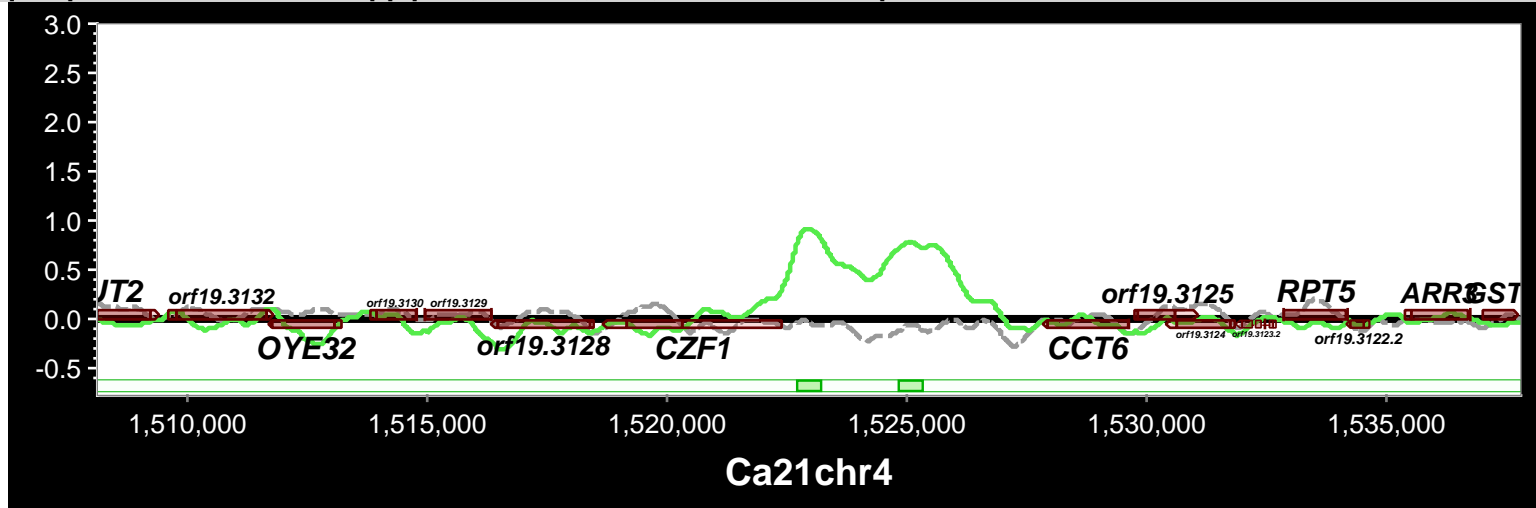

[0.896] Ca21chr1:2260315-2289998 [+] [orf19.4900, GCA1, orf19.4901, orf19.4898, orf19.4897]

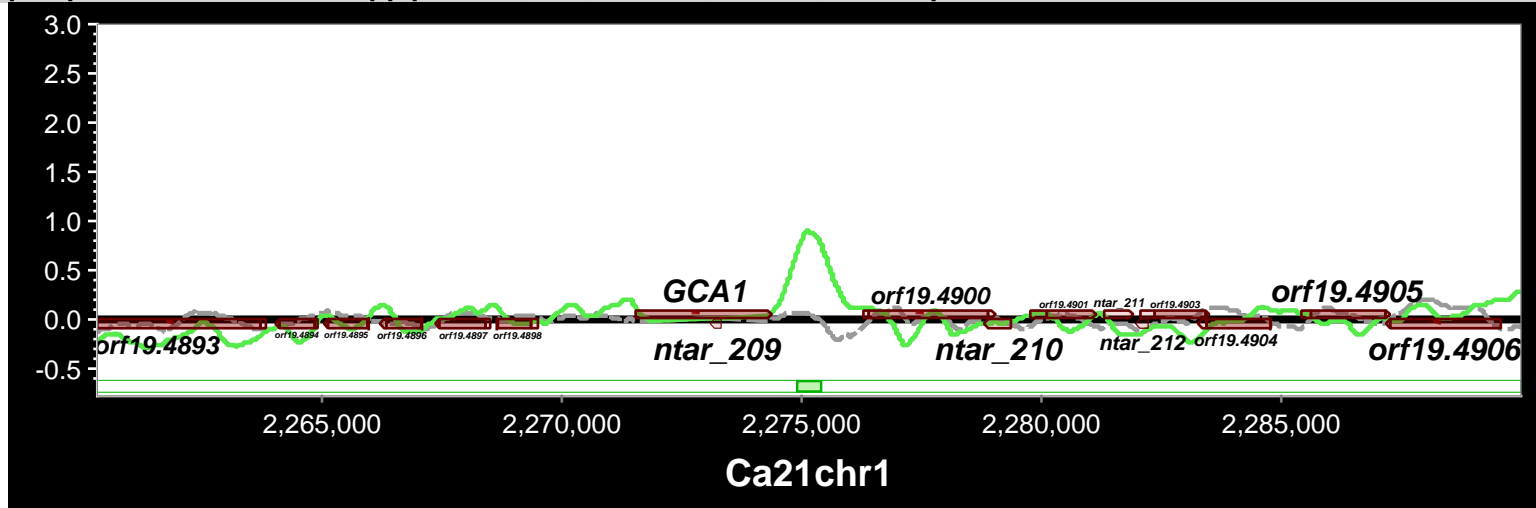

[0.896] Ca21chrR:1176214-1205897 [+] [tC(GCA)1, tC(GCA)2, orf19.5844, RNR3, orf19.5843]

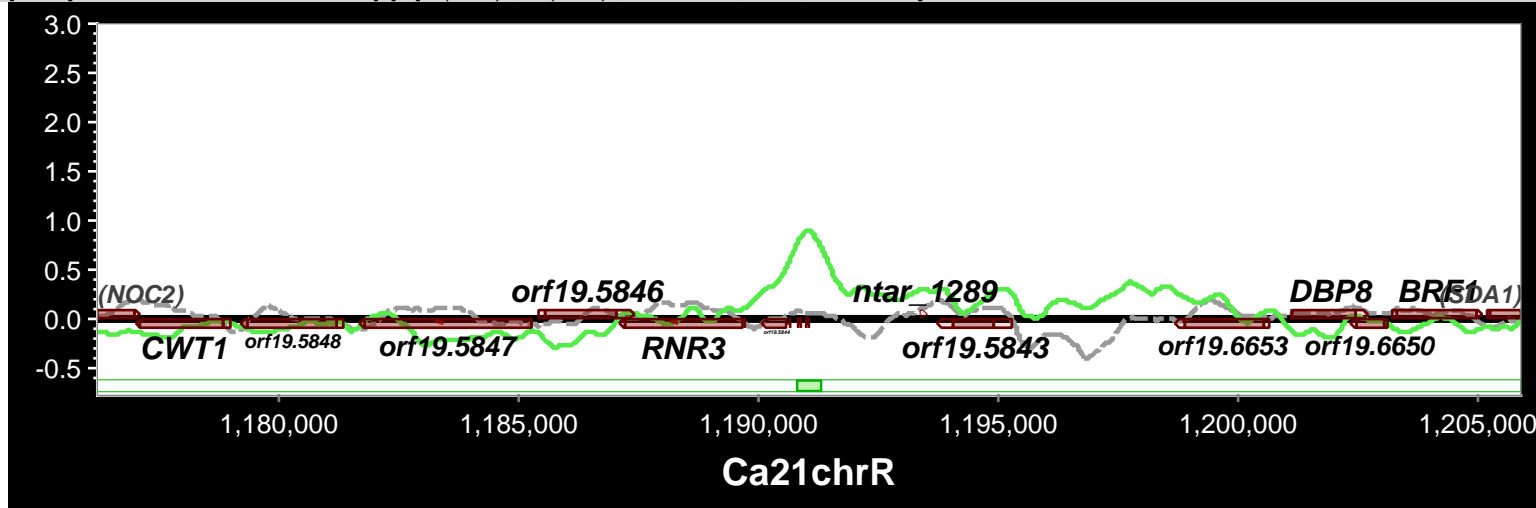

[0.892] Ca21chr7:480298-509981 [+] [orf19.6484, LDG3, orf19.6482, YPS7, orf19.6487]

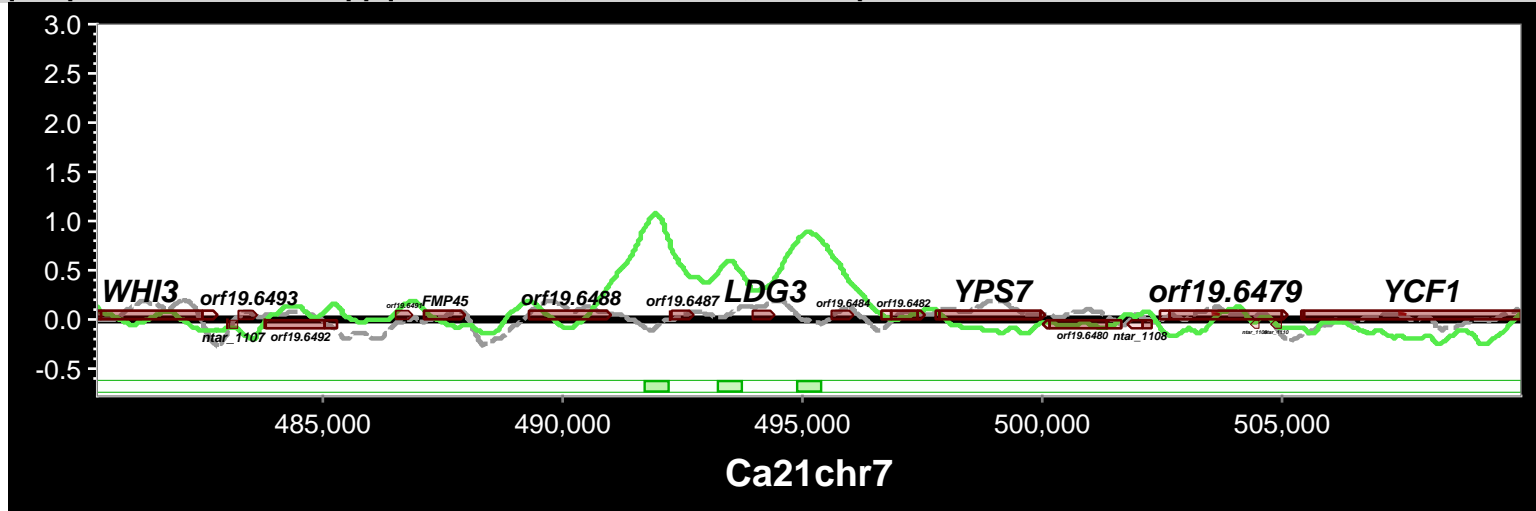

[0.89] Ca21chrR:573396-603079 [+] [orf19.2822, orf19.2821, orf19.2820, orf19.2819, orf19.2818]

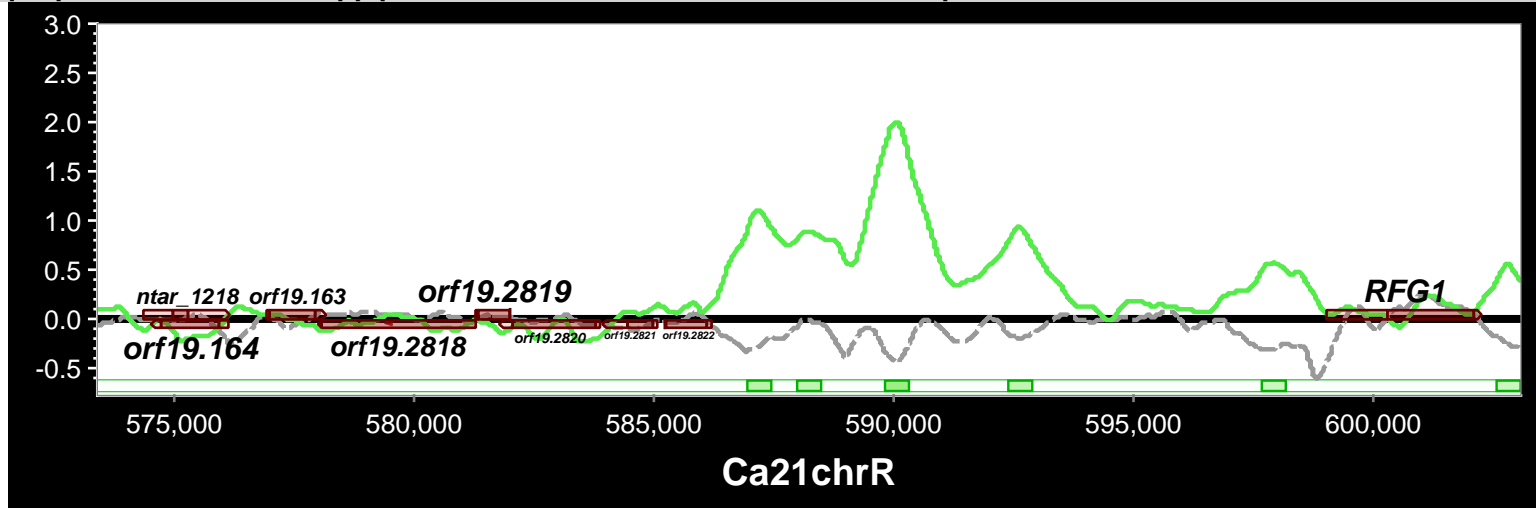

[0.884] Ca21chr6:21438-51121 [+] [orf19.1189, CPH2, orf19.1186, orf19.1185, orf19.1183]

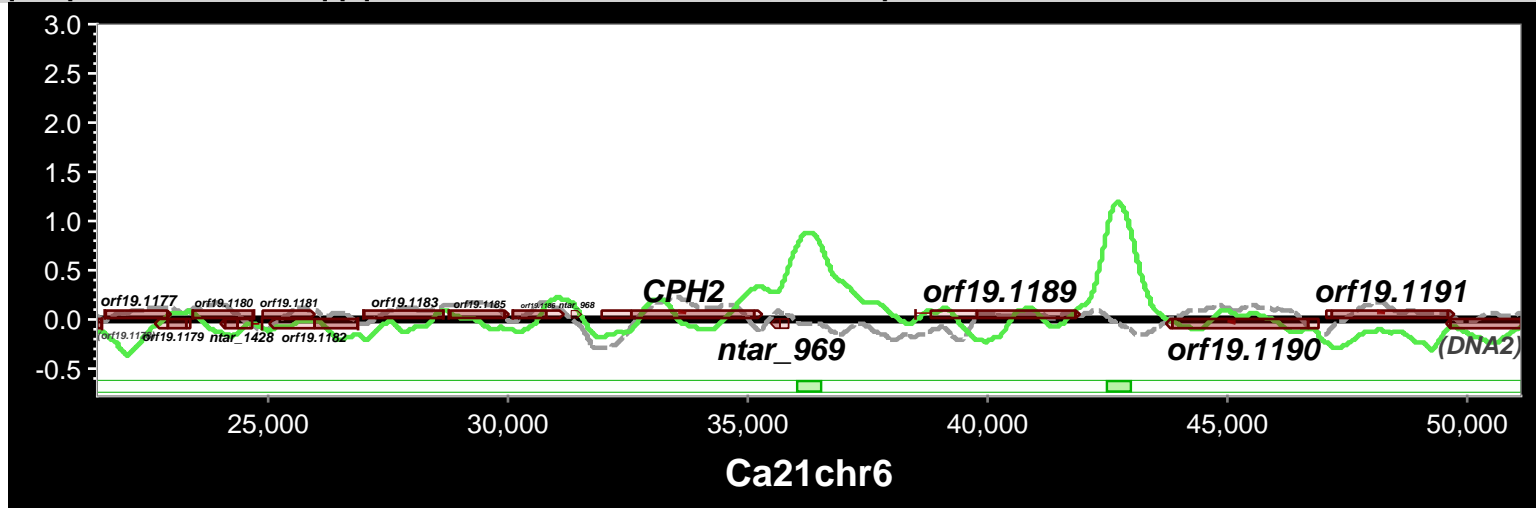

[0.871] Ca21chr3:938967-968650 [+] [TEC1, orf19.5910, CMK1, ADE2, MAK21]

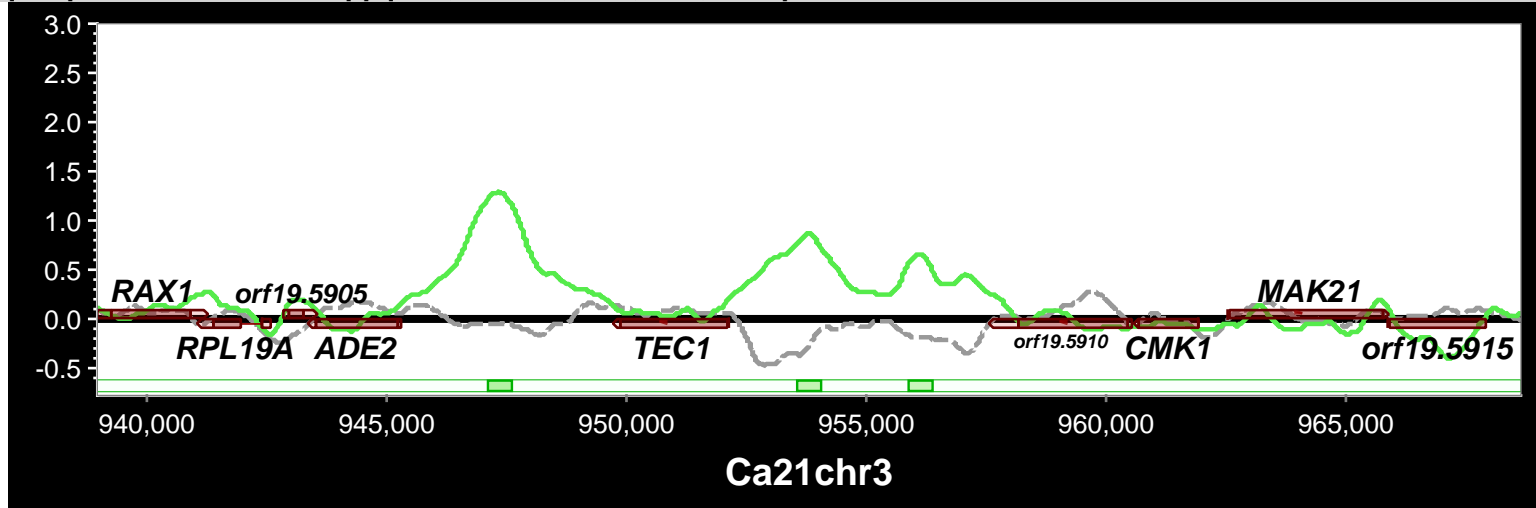

[0.863] Ca21chr7:596641-626324 [+] [LIP5, ERG5, orf19.5177, PRX1, orf19.5175]

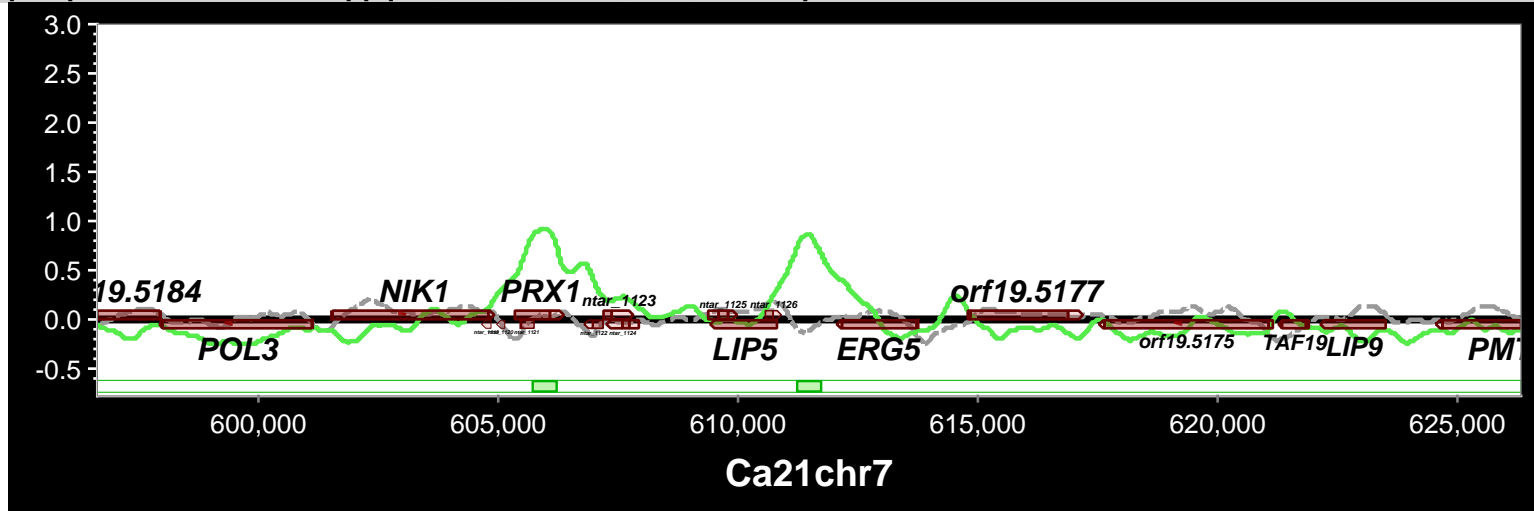

[0.862] Ca21chr1:2207068-2236751 [+] [orf19.4883, orf19.4882, orf19.4880, WOR1, NTF2]

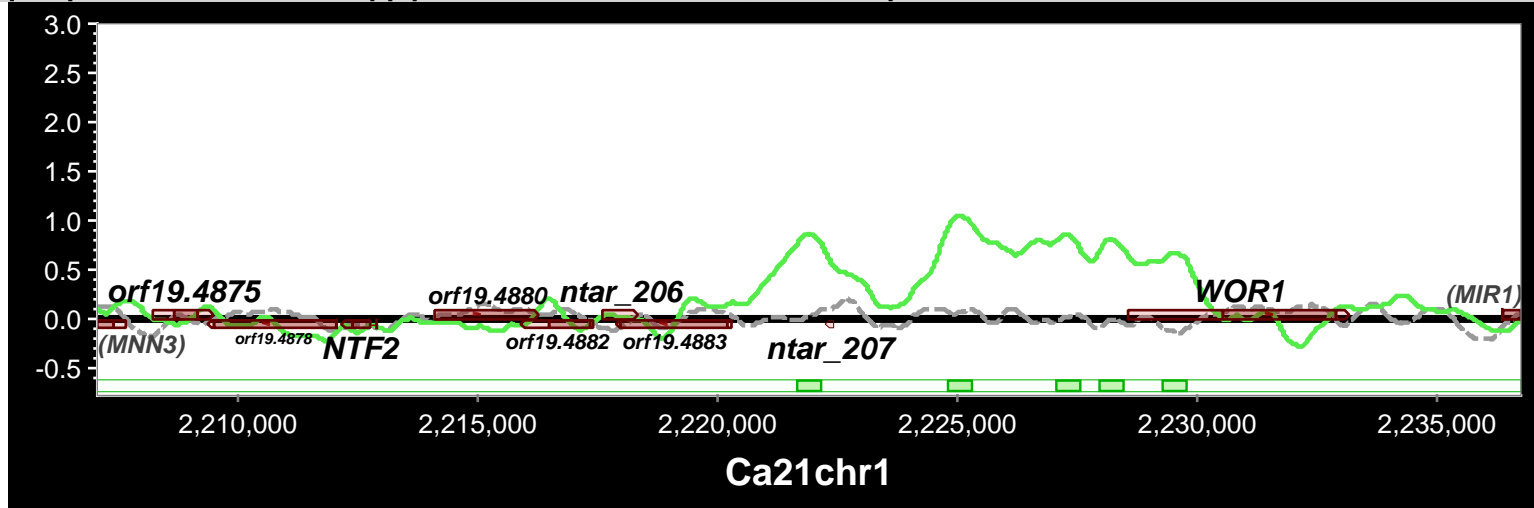

[0.861] Ca21chr1:2212472-2242155 [+] [WOR1, orf19.4883, MIR1, orf19.4882, orf19.4886]

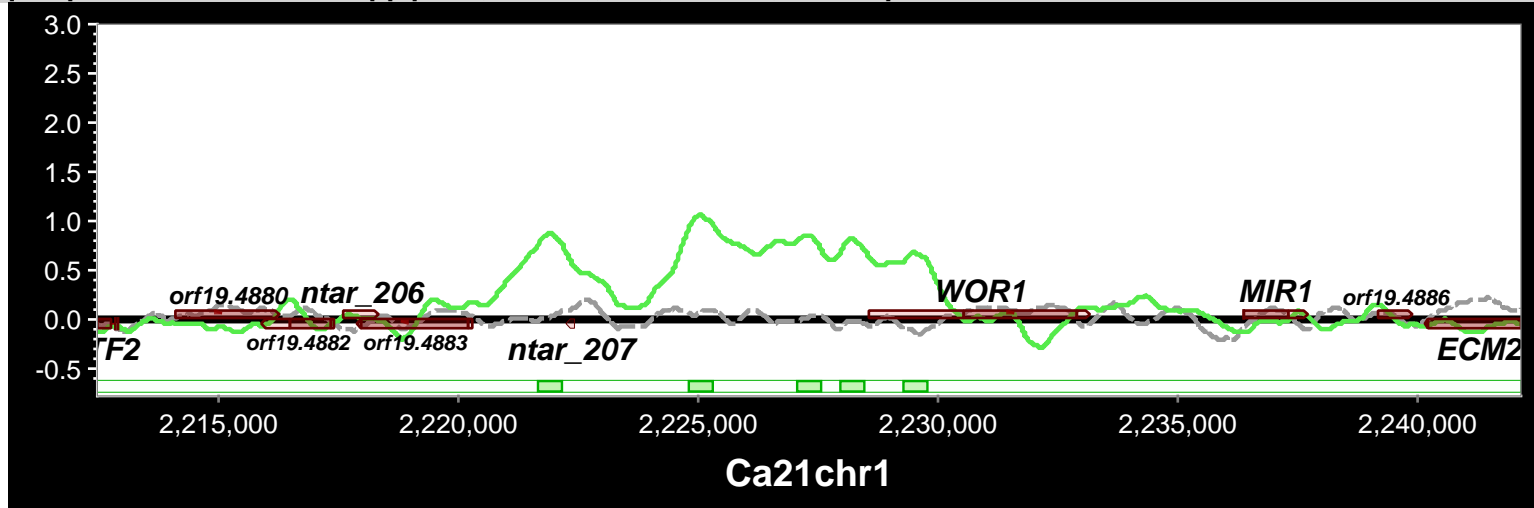

[0.86] Ca21chr1:652567-682250 [+] [ECM33, ARO80, orf19.3010, CDC12, orf19.3009]

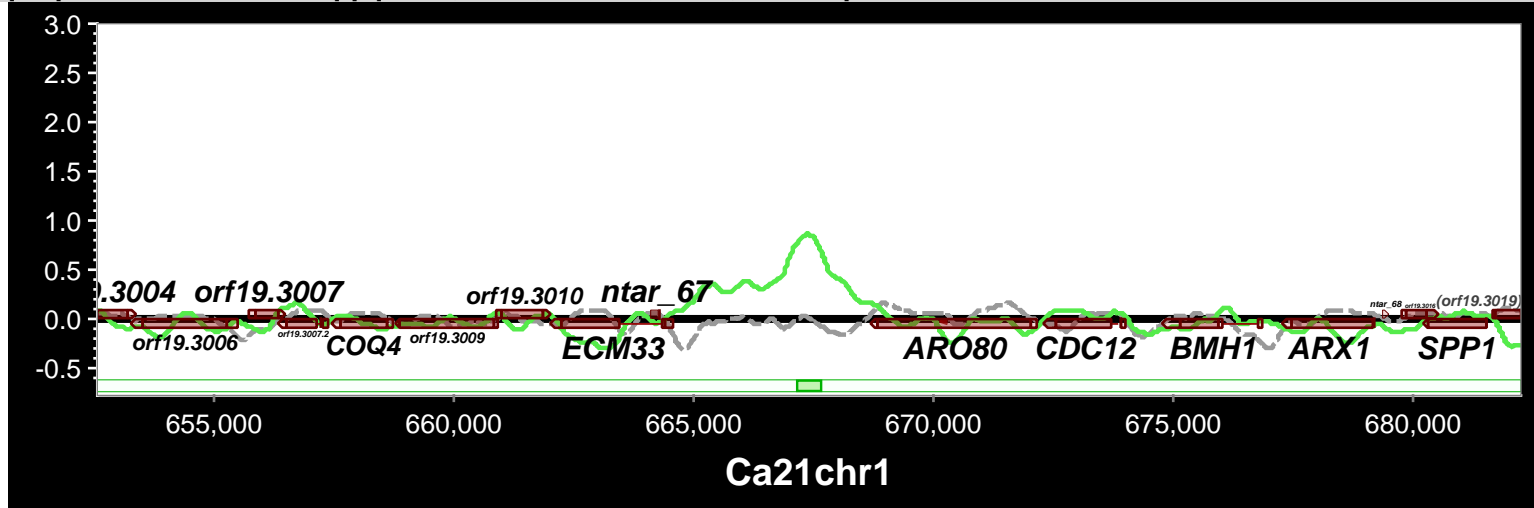

[0.859] Ca21chr5:391732-421415 [+] [FCR3, HIP1, STI1, orf19.3196, PAP1]

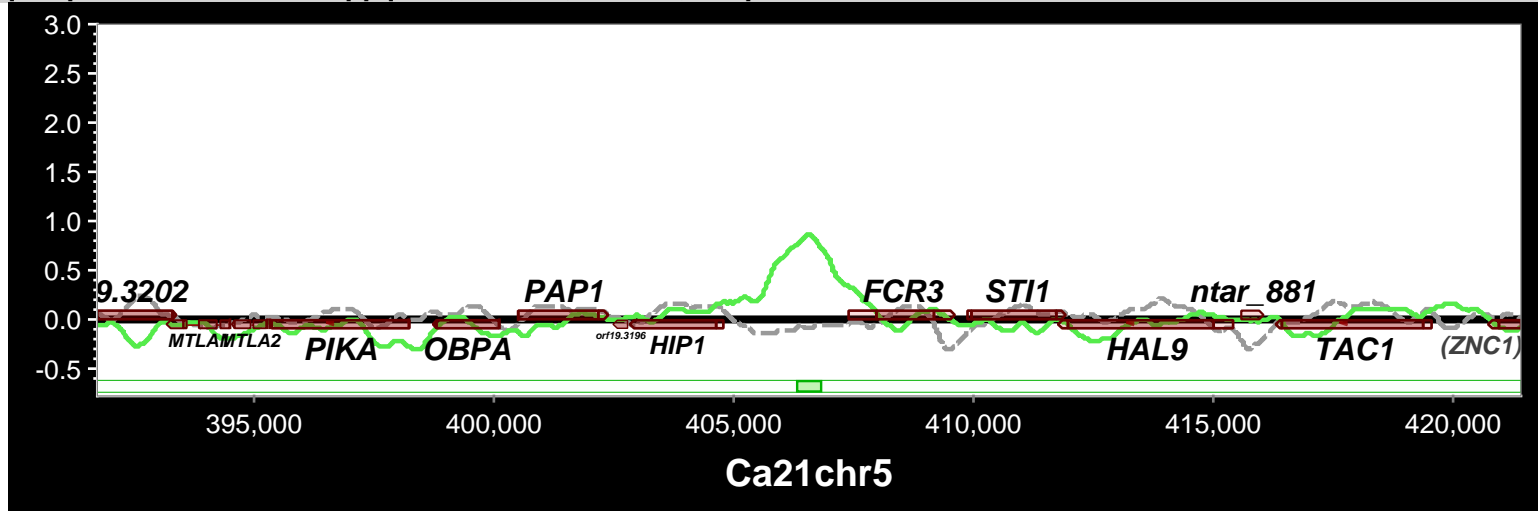

[0.854] Ca21chr6:720354-750037 [+] [orf19.5711, orf19.5710, NAM2, YMX6, SAP1]

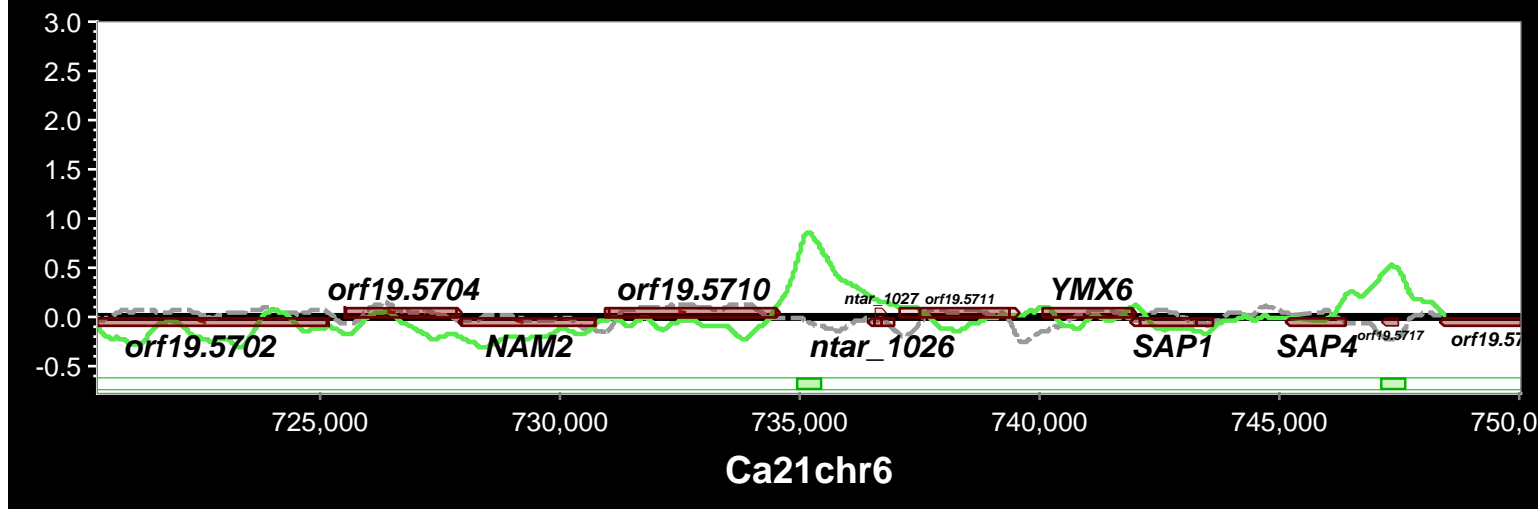

[0.85] Ca21chr7:778235-807918 [+] [ARG4, orf19.6690, orf19.6688, orf19.6691, orf19.6687]

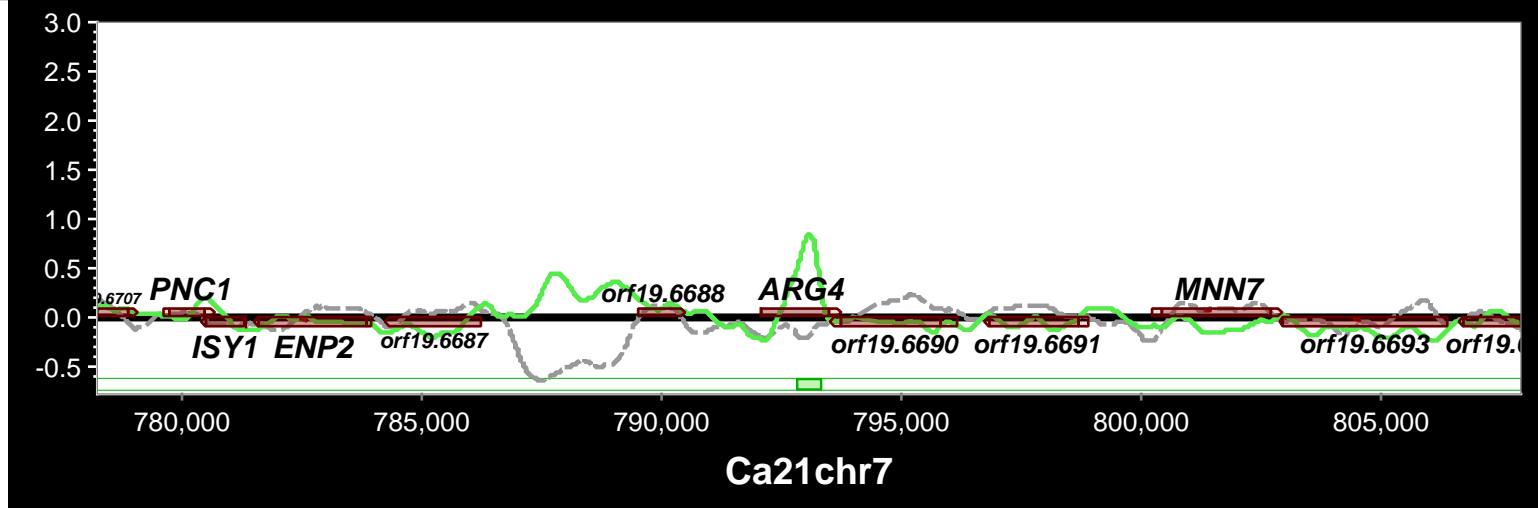

[0.849] Ca21chr2:1727819-1757502 [+] [orf19.3621, YWP1, ANP1, orf19.3617, ERG9]

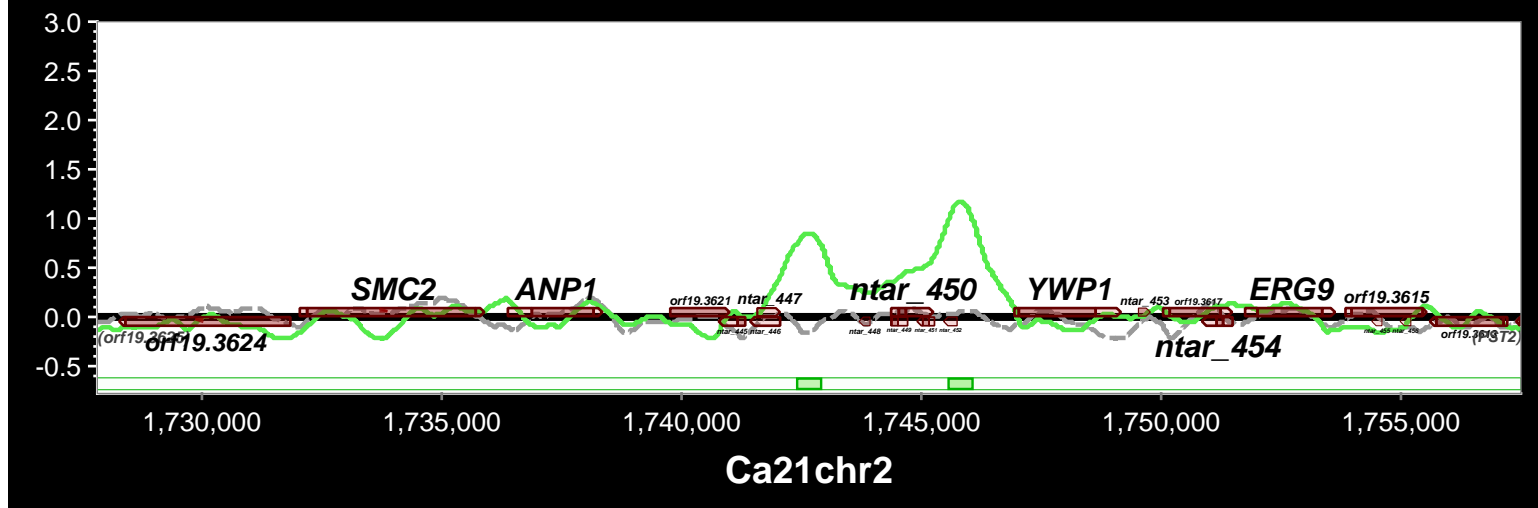

[0.845] Ca21chrR:2090701-2120384 [+] [DEF1, YTA6, FGR46, orf19.7556, orf19.7554]

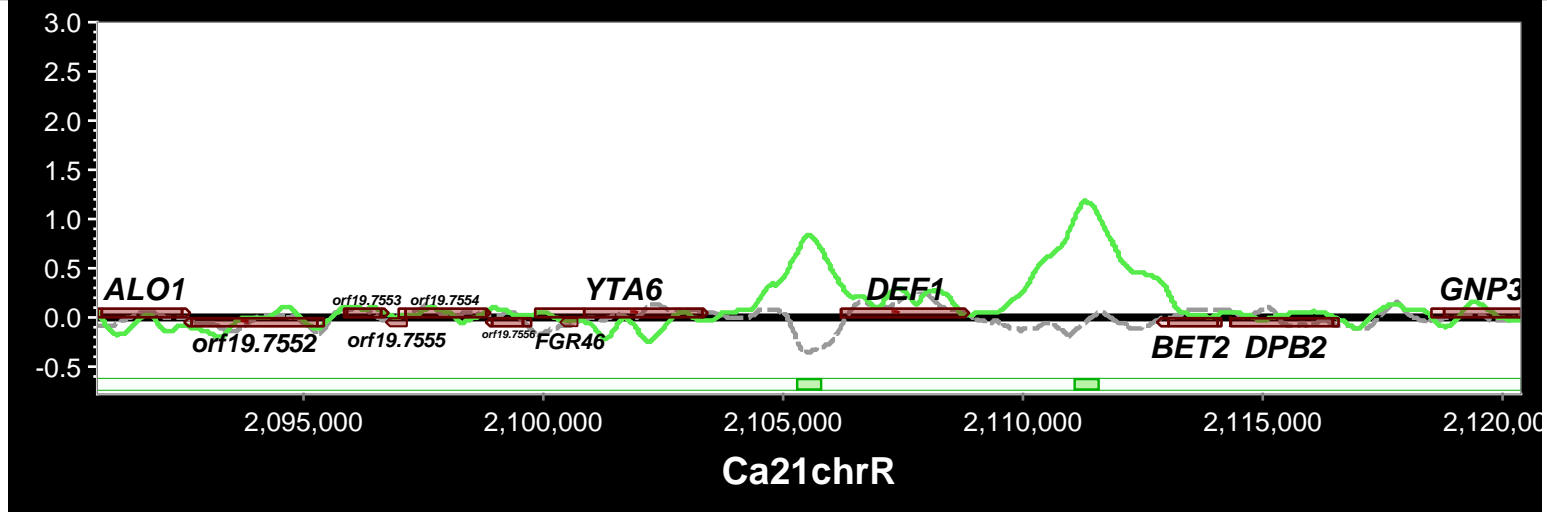

[0.84] Ca21chr6:175522-205205 [+] [CAN1, TOP1, HAL21, orf19.95, orf19.100]

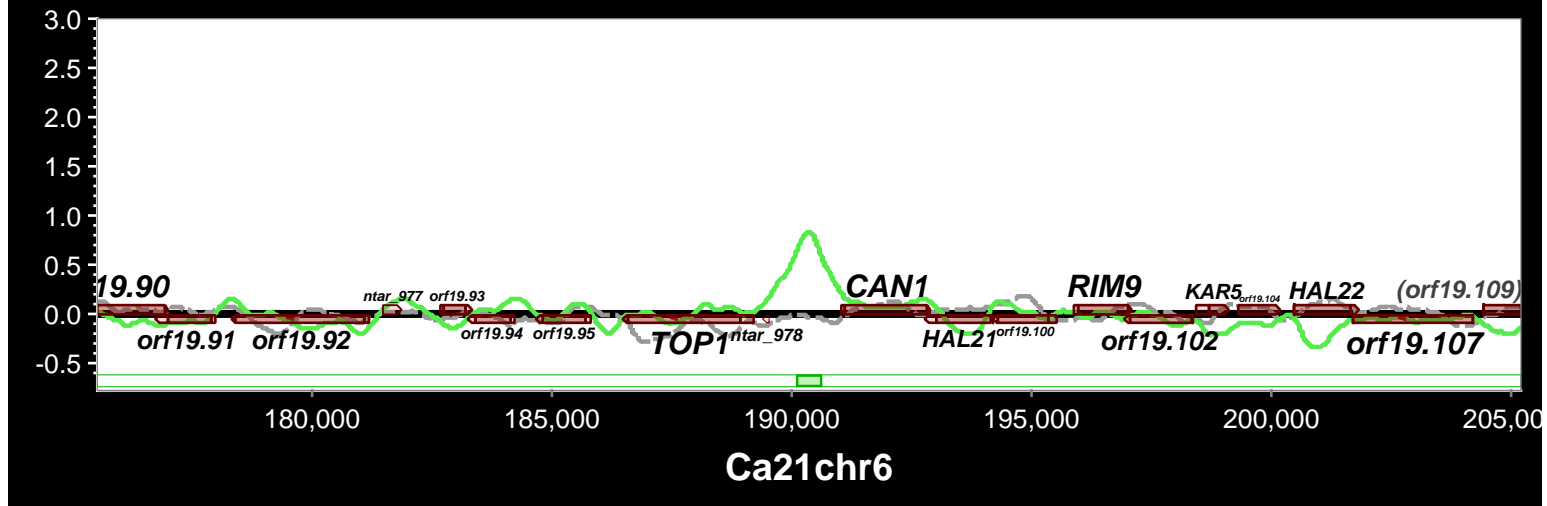

[0.831] Ca21chr4:548183-577866 [+] [orf19.2726, orf19.2725, GRX3, orf19.2728, orf19.2724]

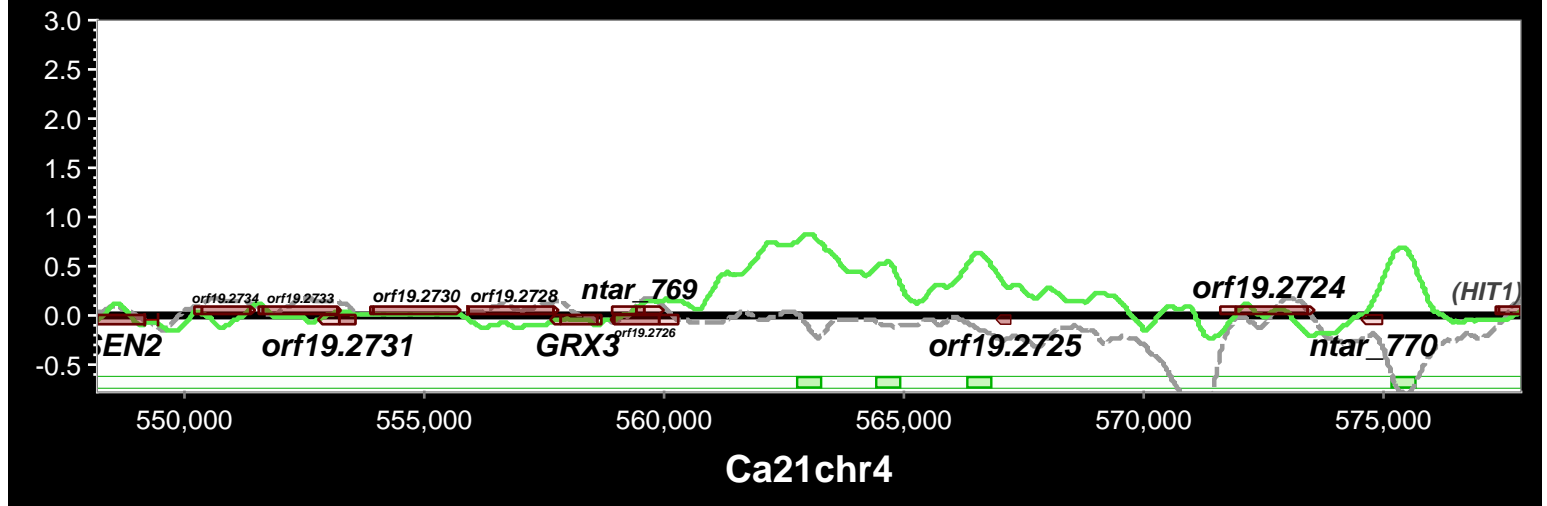

[0.828] Ca21chr1:1557574-1587257 [+] [tl(AAG)2, RME1, orf19.4437, CEN1, orf19.4439]

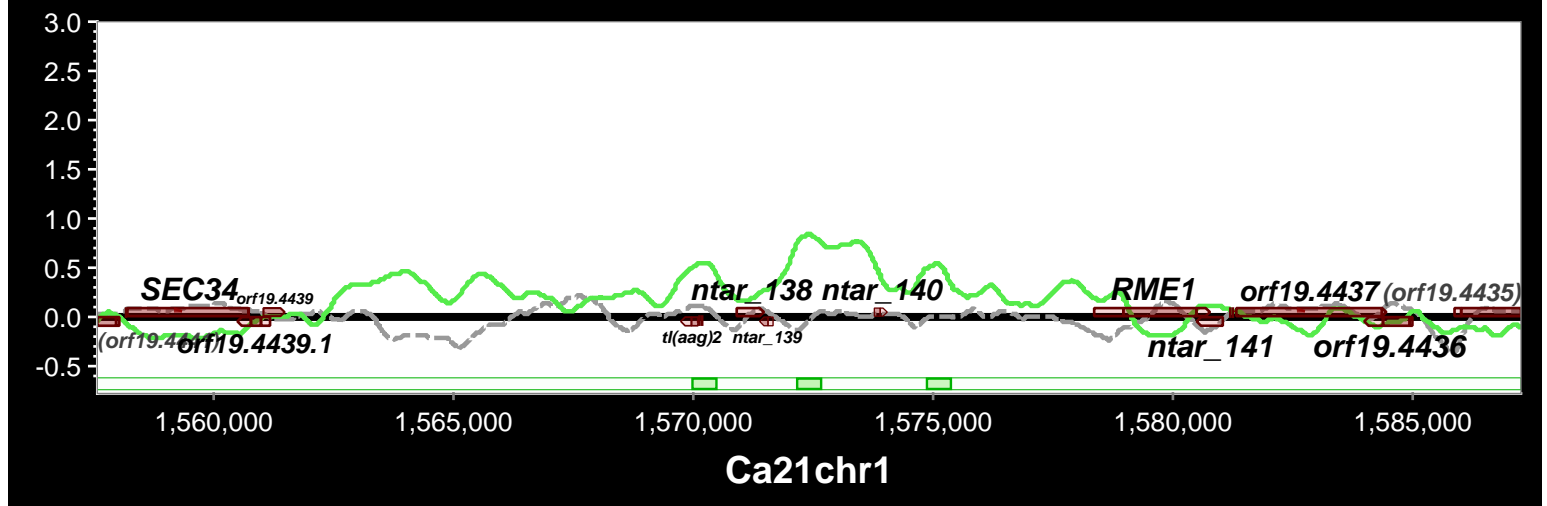

[0.822] Ca21chrR:1706600-1736283 [+] [EFG1, orf19.609, tG(GCC)1, orf19.607, orf19.612]

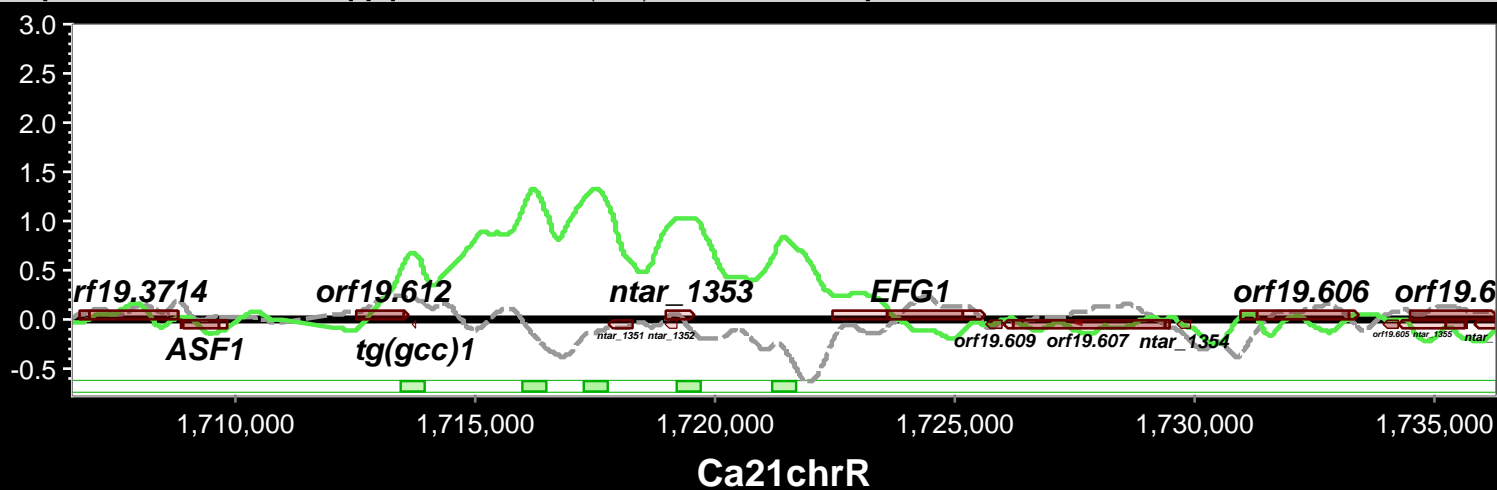

[0.815] Ca21chr6:775872-805555 [+] [ALS1, ALS9, ALS5, orf19.5735.3, CDC50]

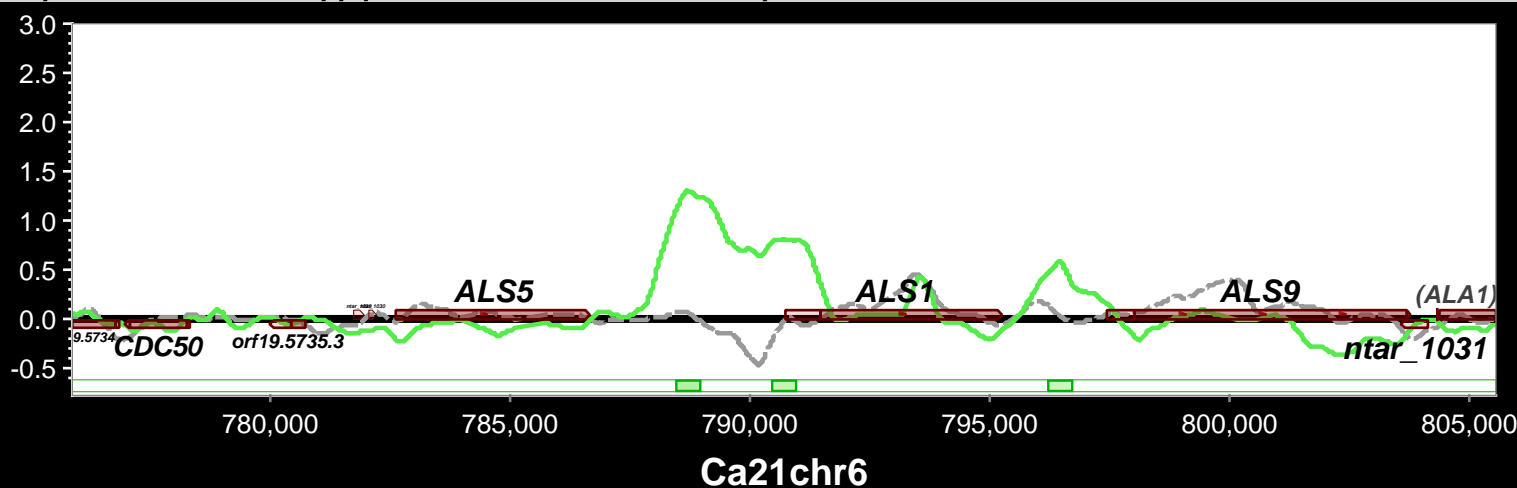

[0.813] Ca21chr1:2213373-2243056 [+] [WOR1, orf19.4883, MIR1, orf19.4882, orf19.4886]

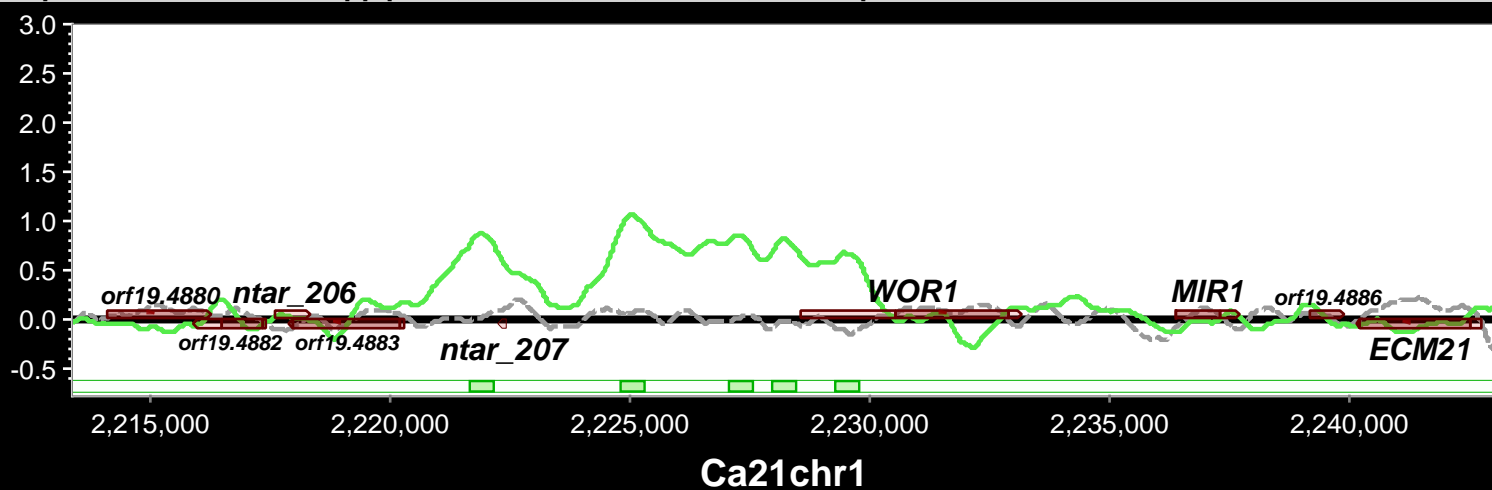

[0.813] Ca21chr5:1032736-1062419 [+] [orf19.3968, orf19.3969, PFK1, CRH12, orf19.3965]

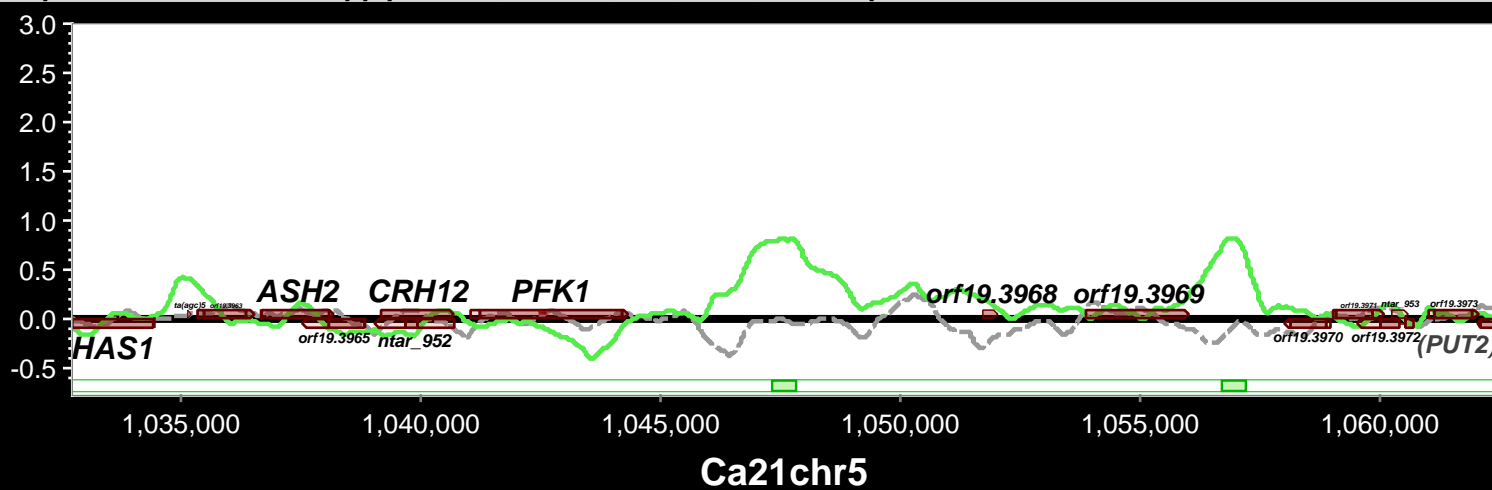

[0.813] Ca21chr5:1042113-1071796 [+] [orf19.3970, orf19.3971, orf19.3969, orf19.3972, orf19.3973]

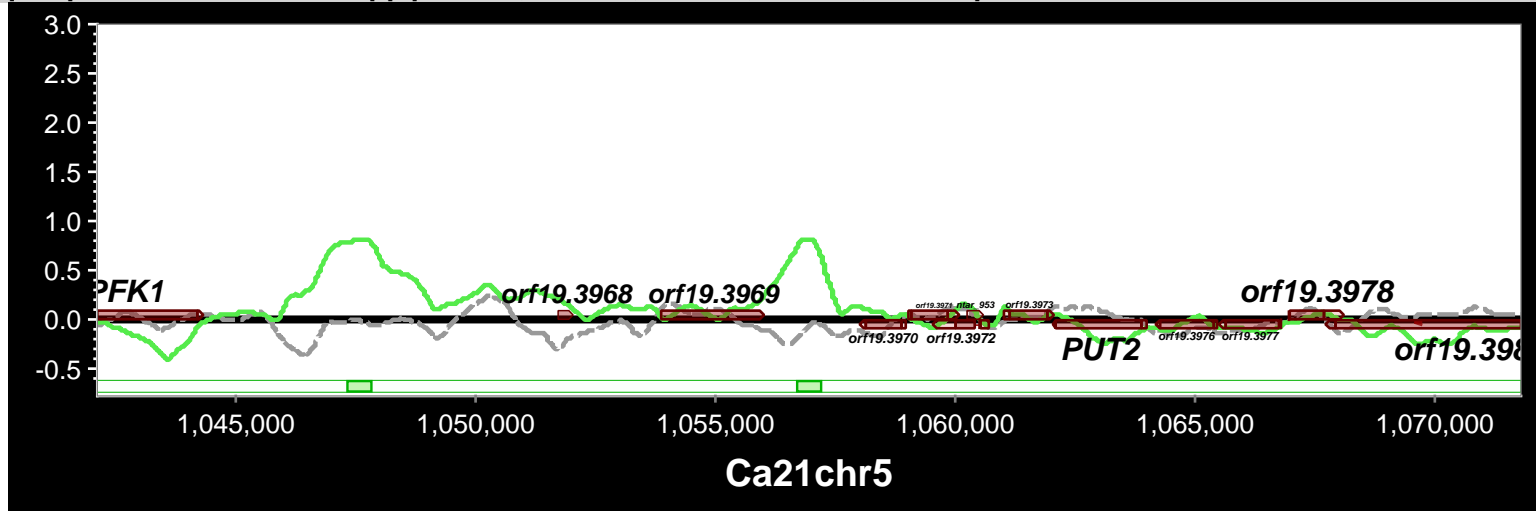

[0.808] Ca21chr2:775338-805021 [+] [tR(UCU)2, tF(GAA)2, YIM1, orf19.849, orf19.846]

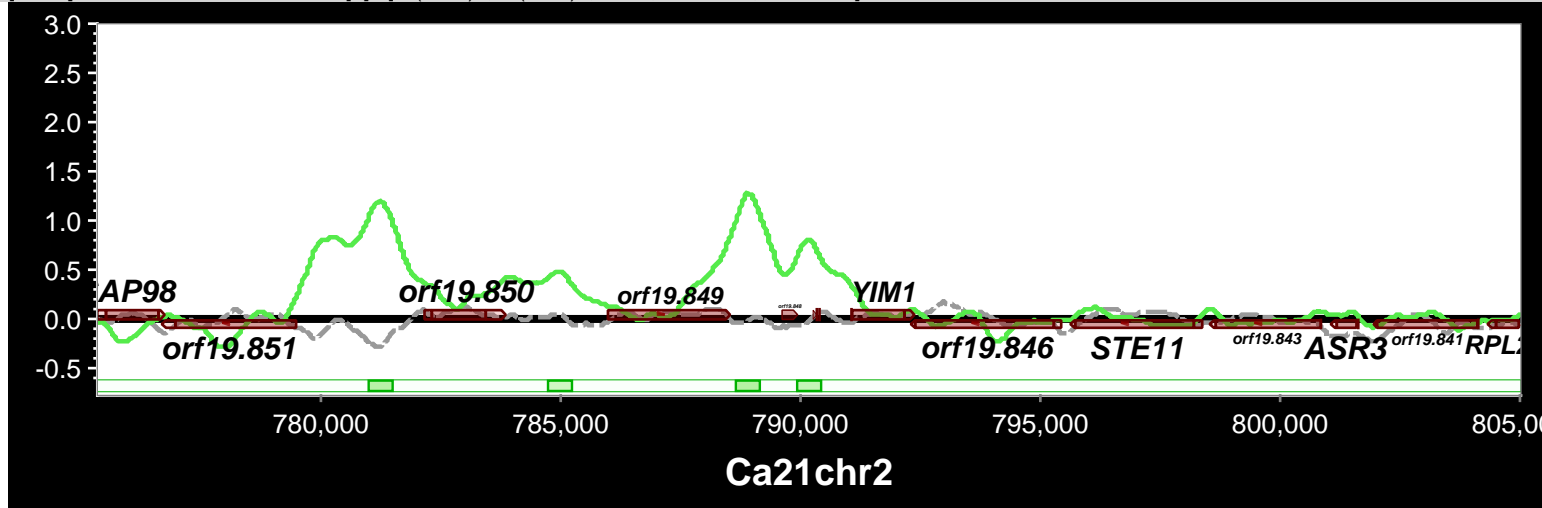

[0.807] Ca21chrR:1618781-1648464 [+] [ECM22, orf19.2624, orf19.2625, YPT31, RGD3]

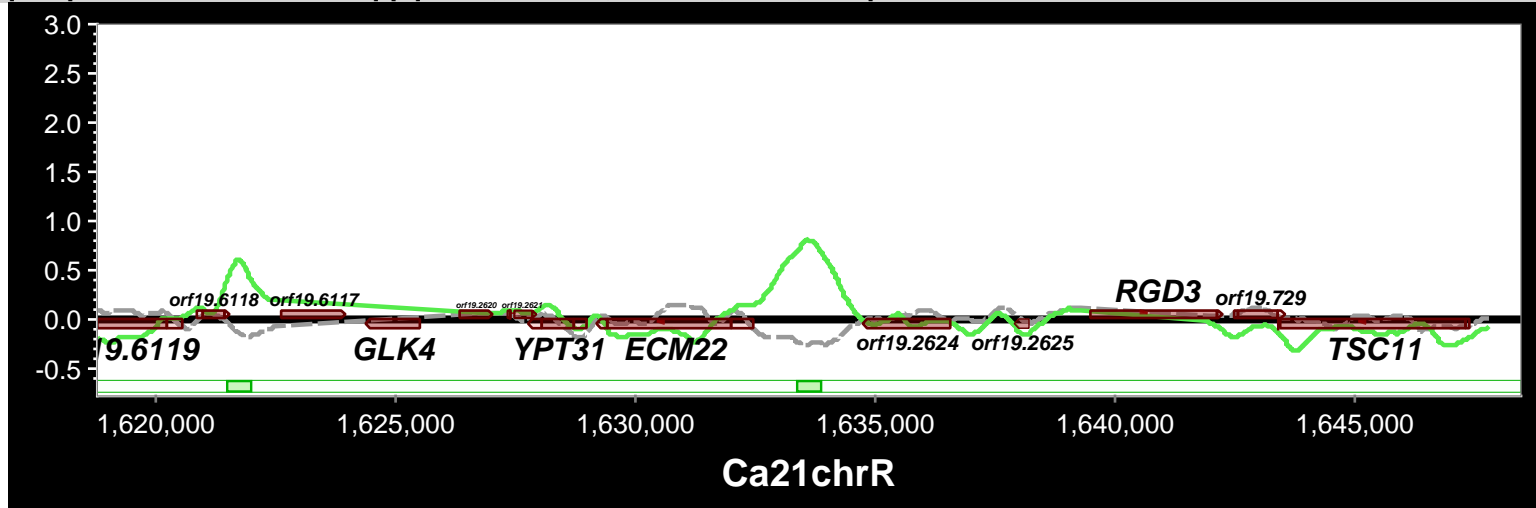

[0.805] Ca21chrR:1671908-1701591 [+] [YHB1, orf19.3706, PTC6, orf19.3704.1, orf19.3704]

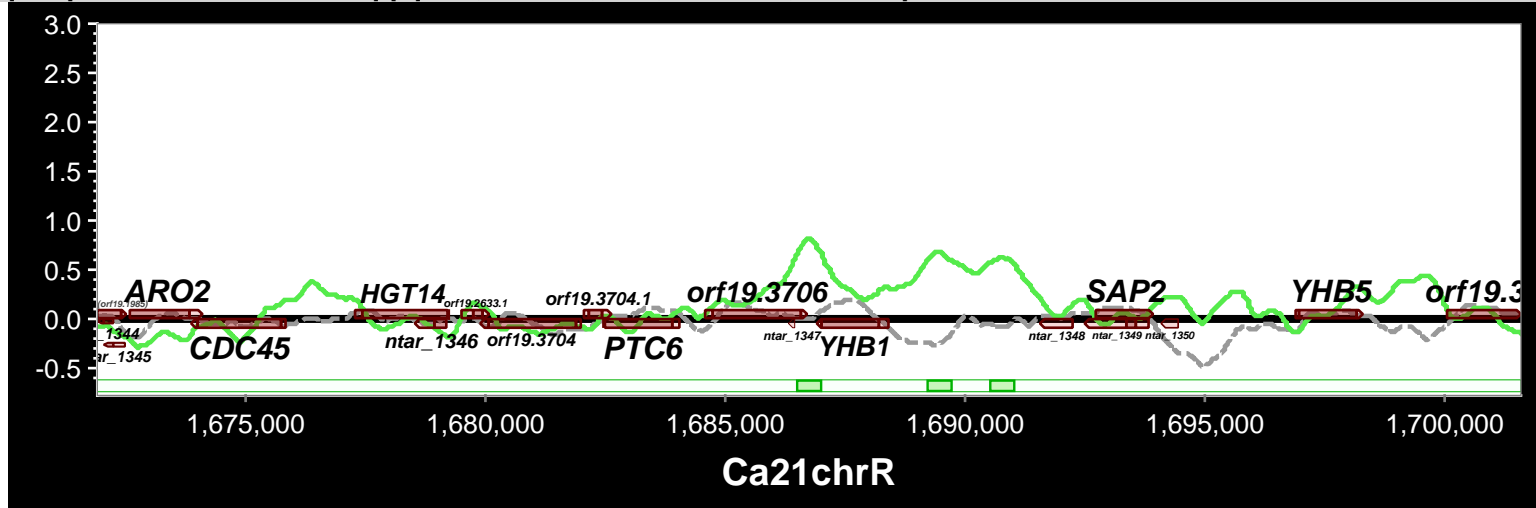



[0.8] Ca21chr7:433410-463093 [+] [CUP9, HSP90, EXO70, LIG1, RAD14]

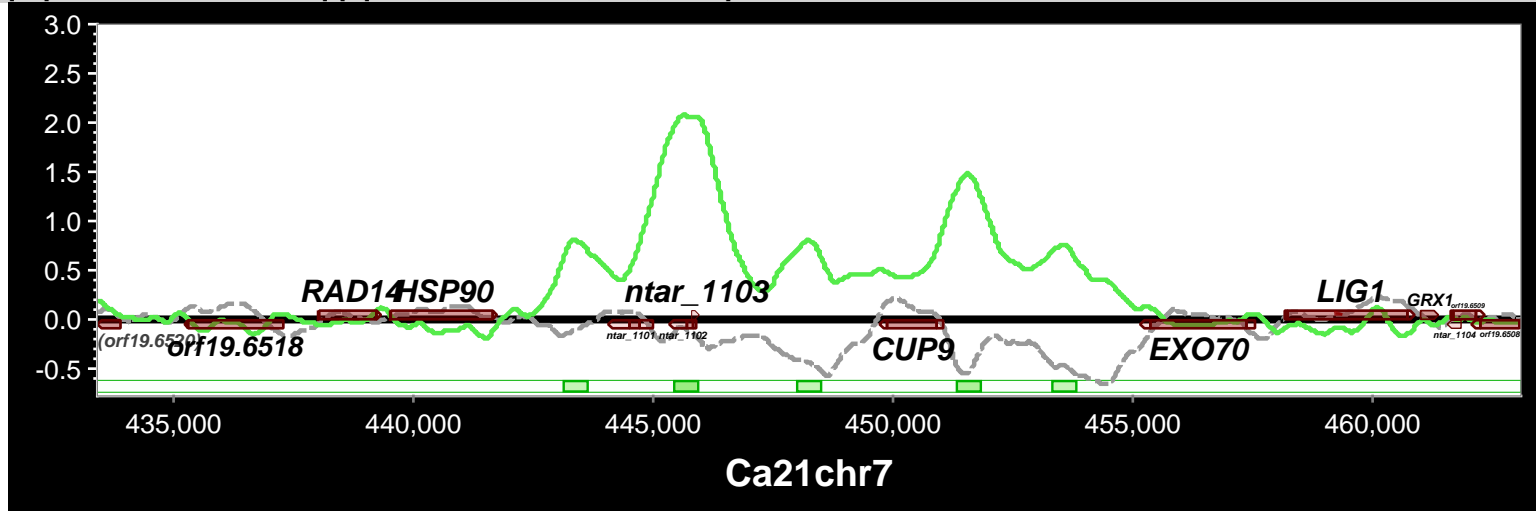

[0.796] Ca21chrR:1005285-1034968 [+] [tS(GCU)2, tS(GCU)1, orf19.1736, orf19.1735, orf19.1737]

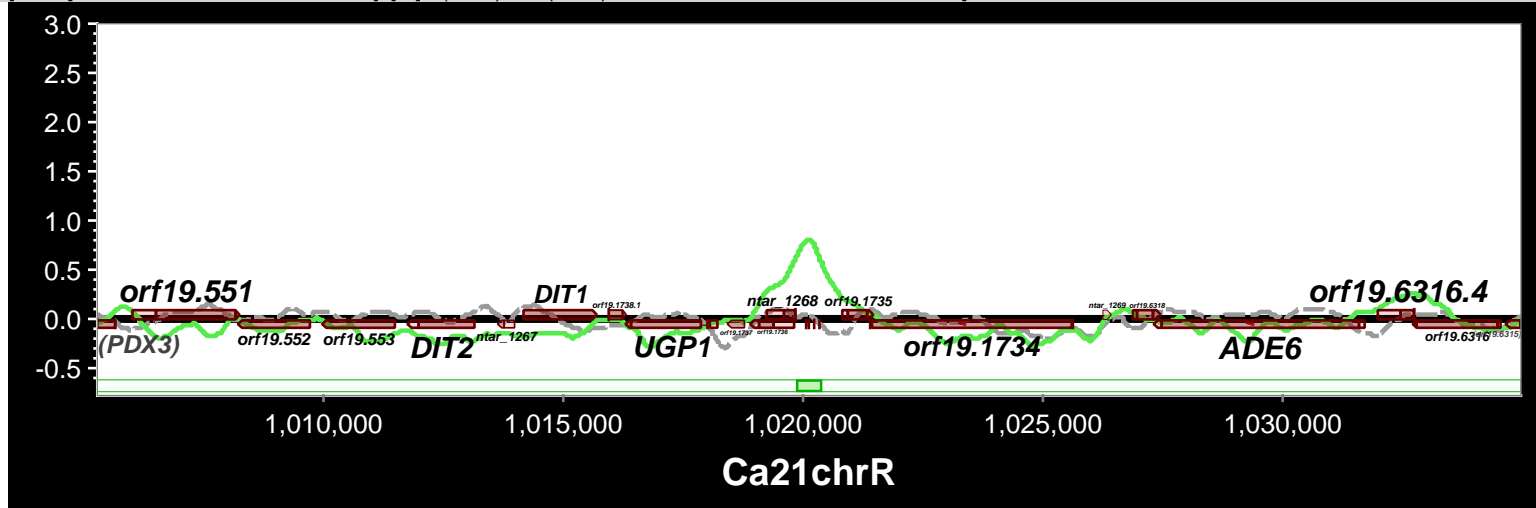

[0.795] Ca21chr1:1067384-1097067 [+] [GAT2, orf19.450, orf19.4057, orf19.449, orf19.4059]

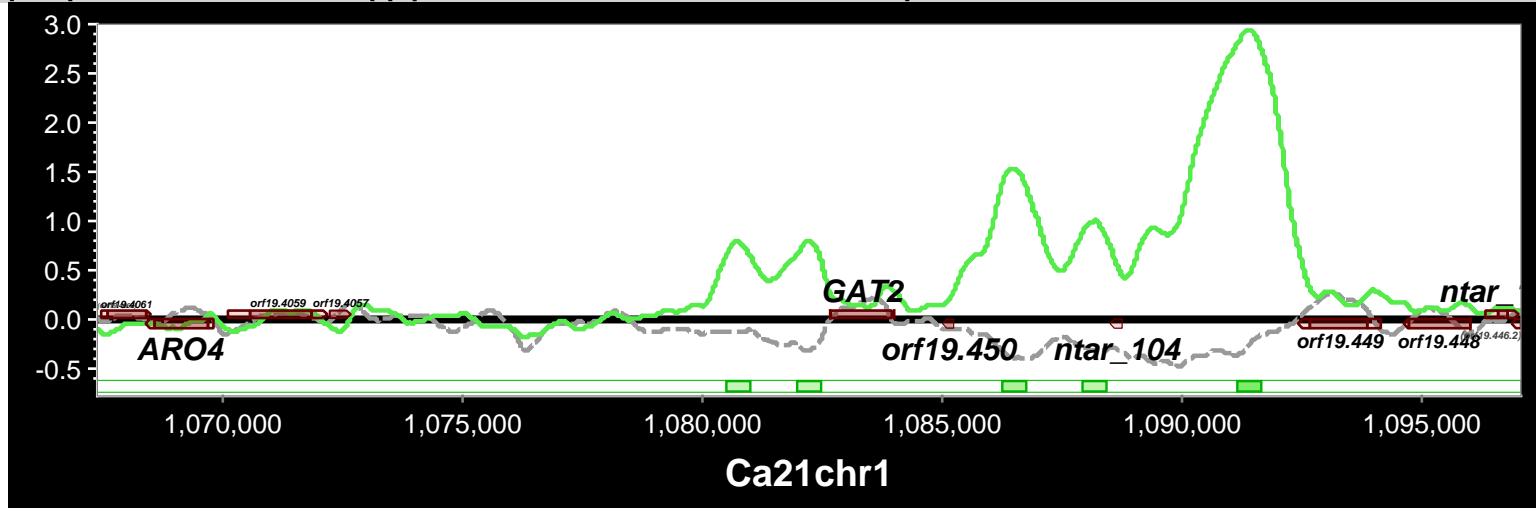

[0.793] Ca21chr6:825550-855233 [+] [IHD1, PGA61, tA(UGC)2, SNQ2, orf19.5763]

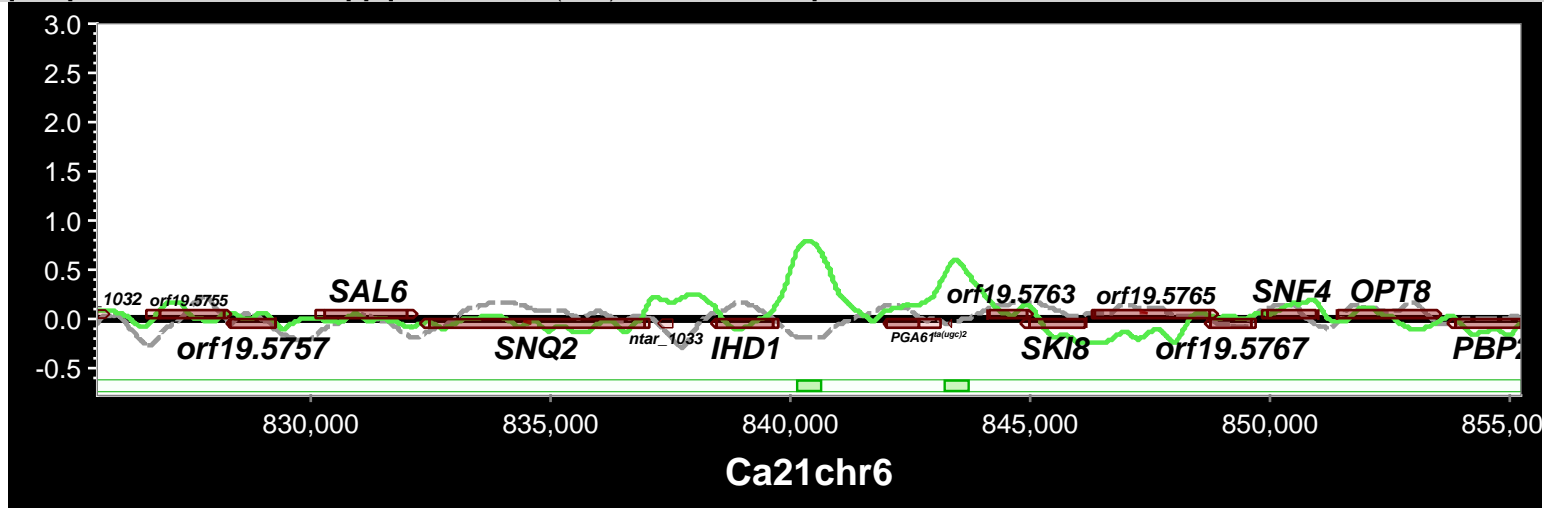

[0.792] Ca21chr7:363605-393288 [+] [orf19.6547, ISU1, LPI9, orf19.6550, orf19.6551]

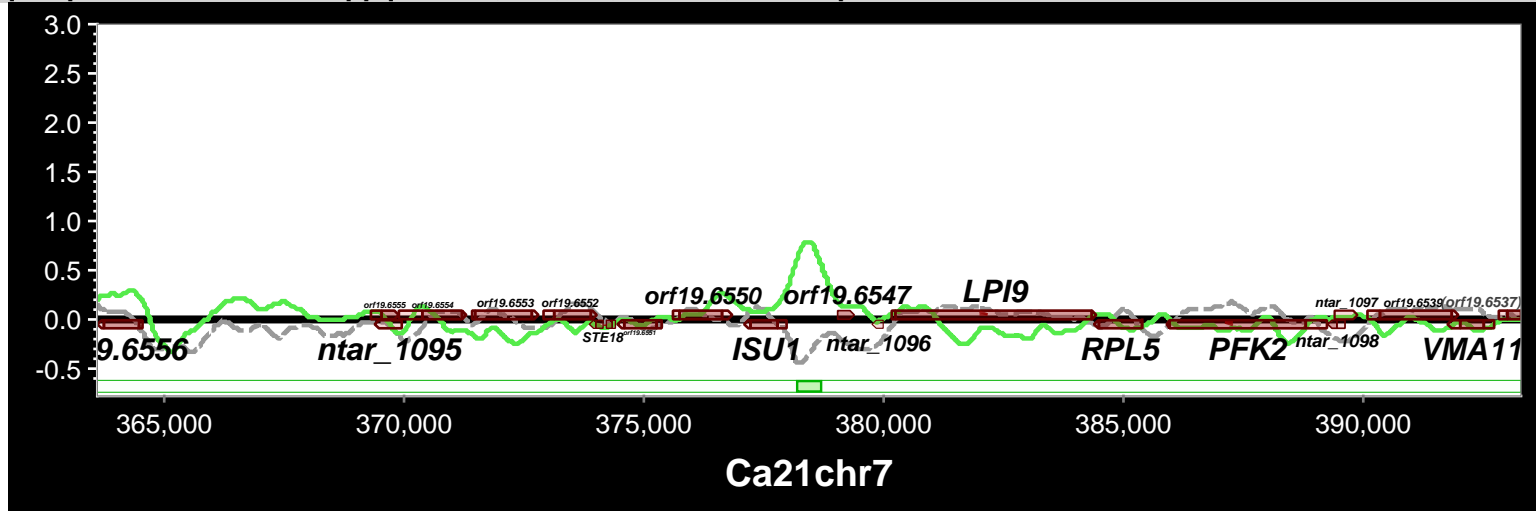

[0.791] Ca21chr4:218515-248198 [+] [CRD2, orf19.4675, orf19.4676, orf19.4677, BMT9]

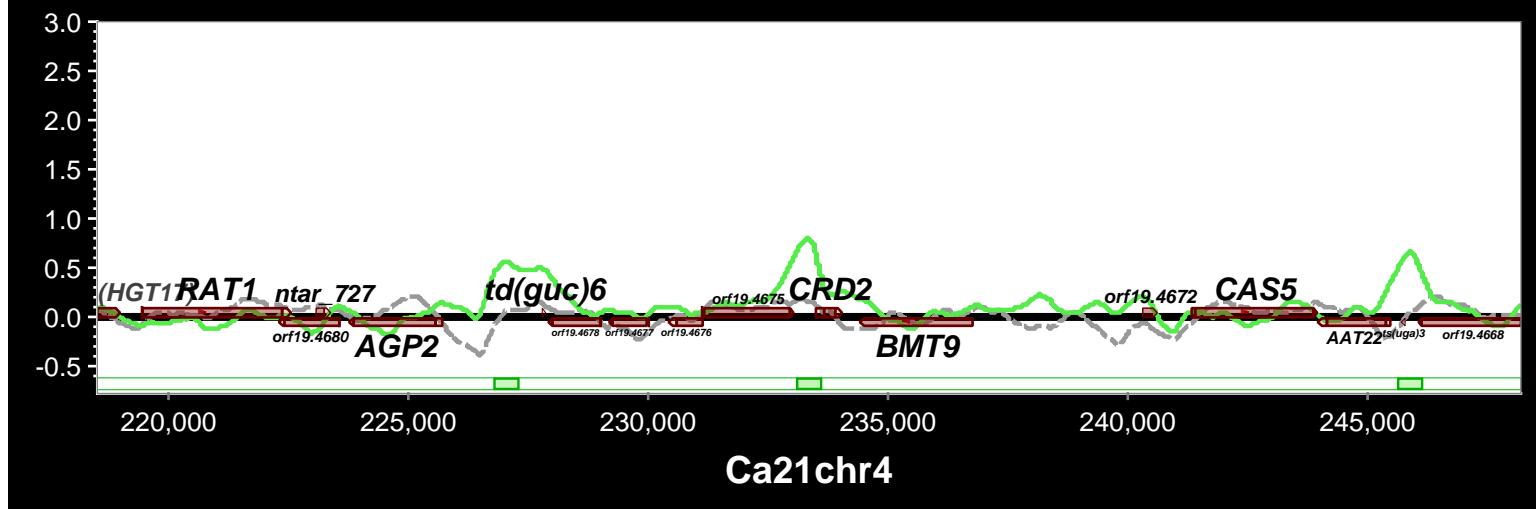

[0.79] Ca21chr7:428542-458225 [+] [HSP90, RAD14, orf19.6518, CUP9, orf19.6520]

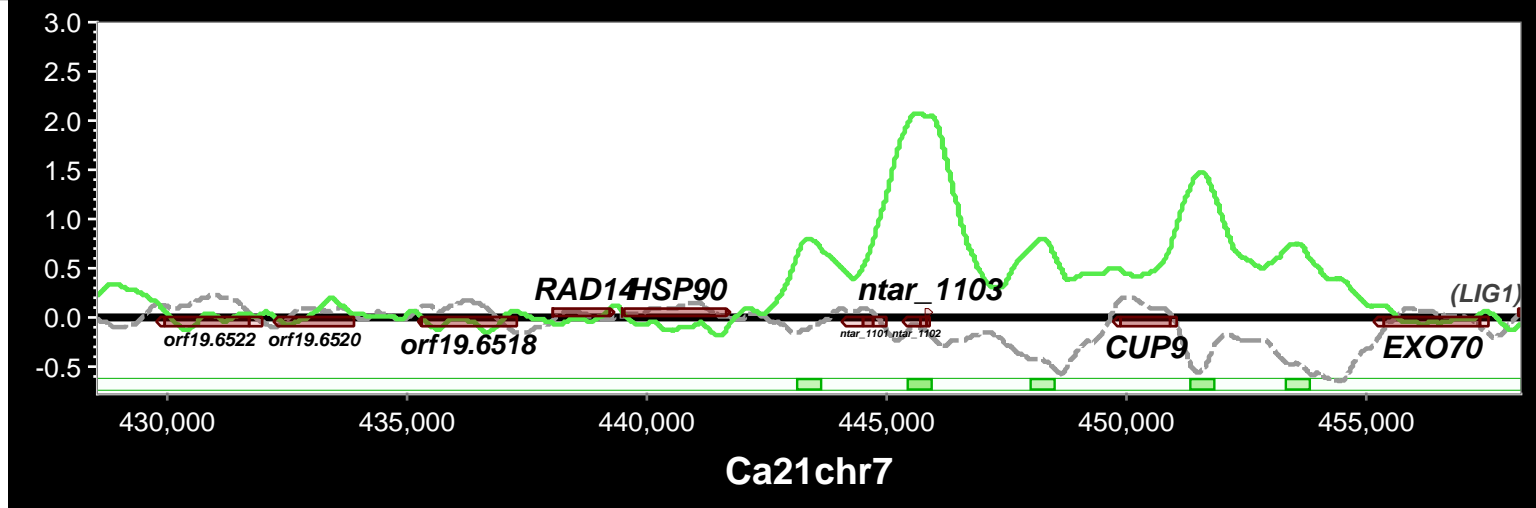

[0.788] Ca21chr1:1065908-1095591 [+] [GAT2, orf19.450, orf19.4057, orf19.4059, ARO4]

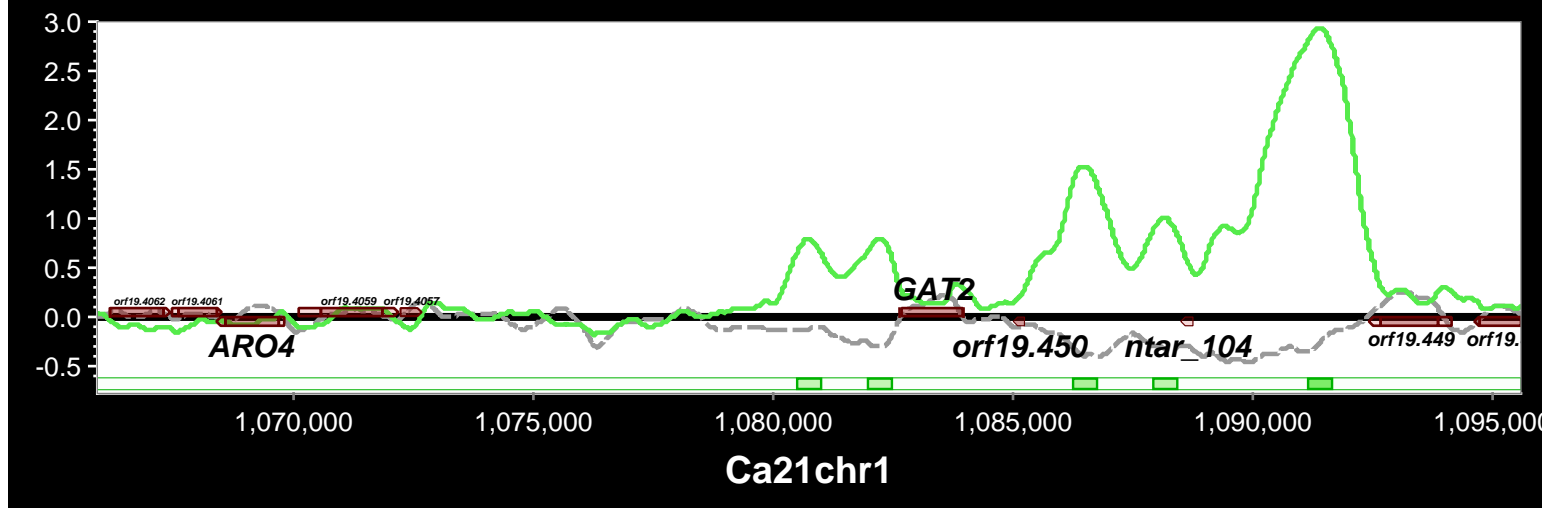

[0.783] Ca21chr1:1730055-1759738 [+] [orf19.5070, NRP1, DPM1, orf19.5074, orf19.5069]

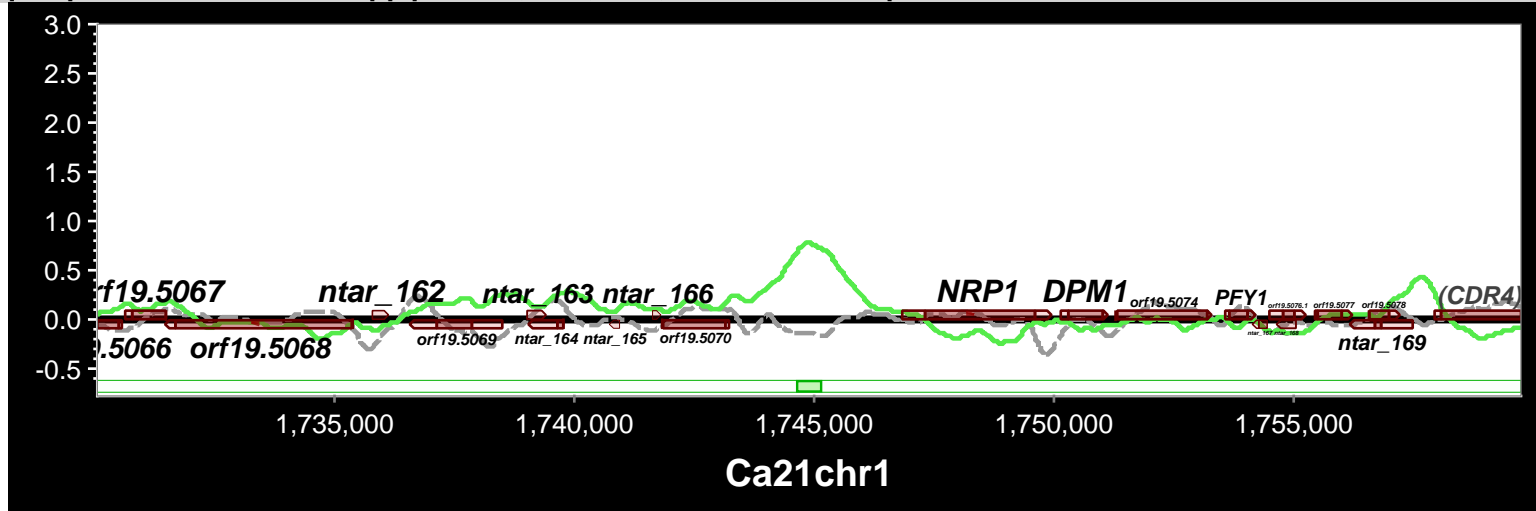

[0.783] Ca21chr4:1510240-1539923 [+] [CCT6, orf19.3125, CZF1, orf19.3124, orf19.3128]

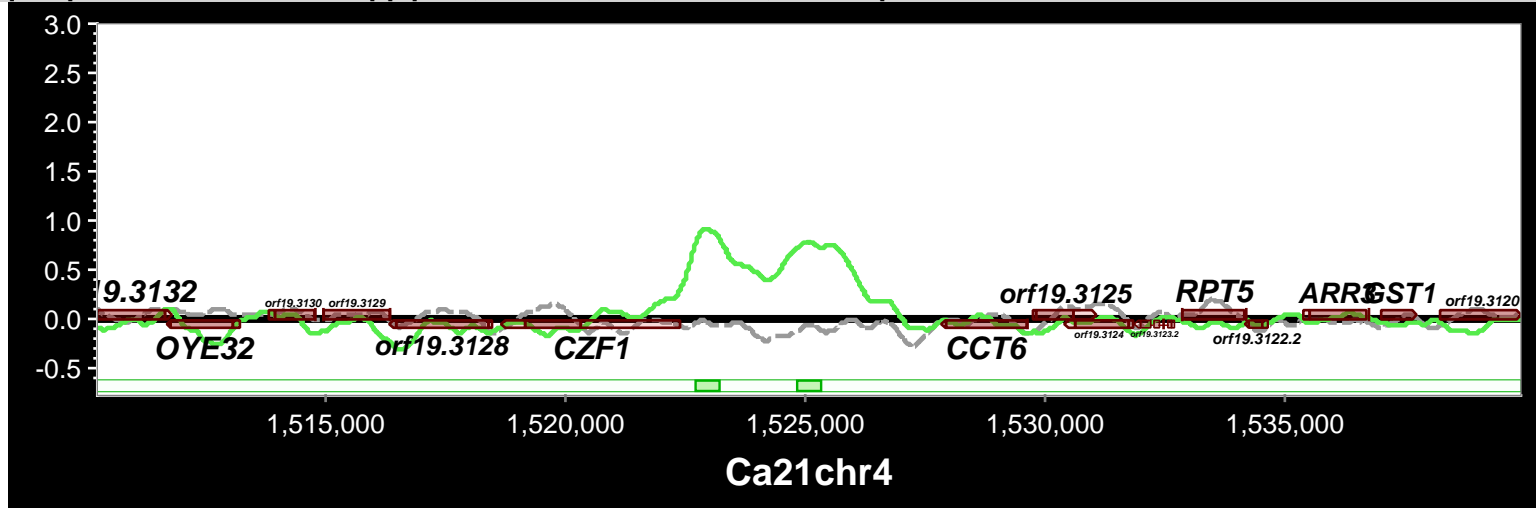

[0.782] Ca21chr1:2856943-2886626 [+] [orf19.4942, TYE7, PSA2, orf19.4940, orf19.4939]

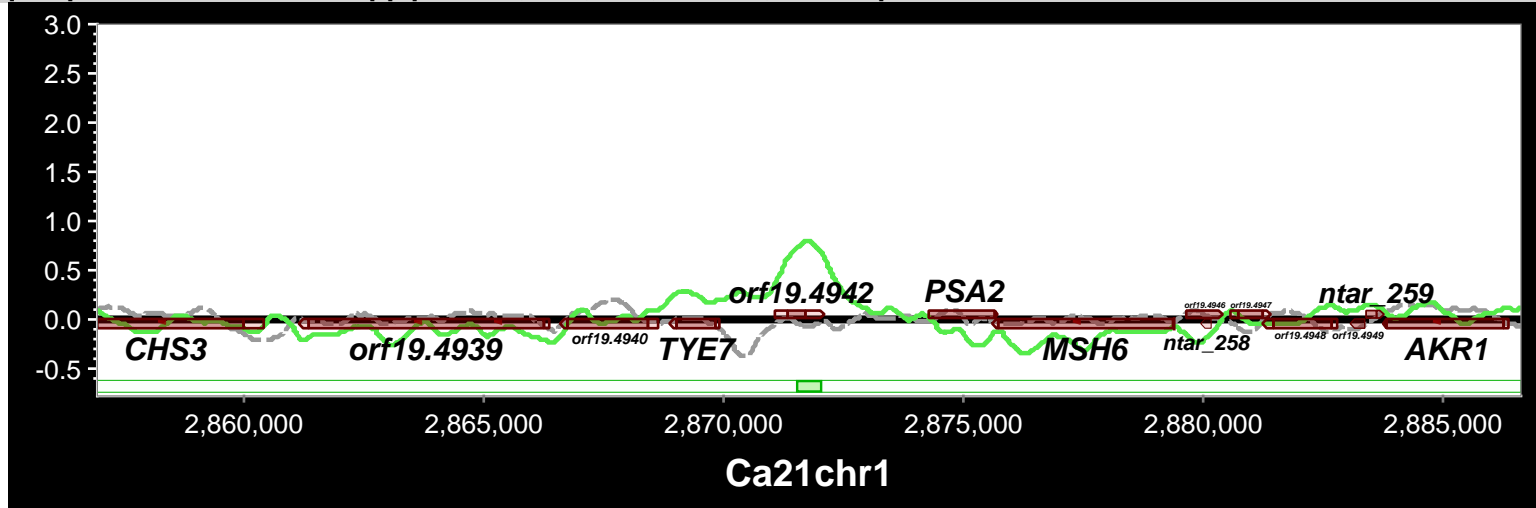

[0.778] Ca21chr4:57421-87104 [+] [OPT7, PGA10, MEP2, orf19.5675, orf19.5671]

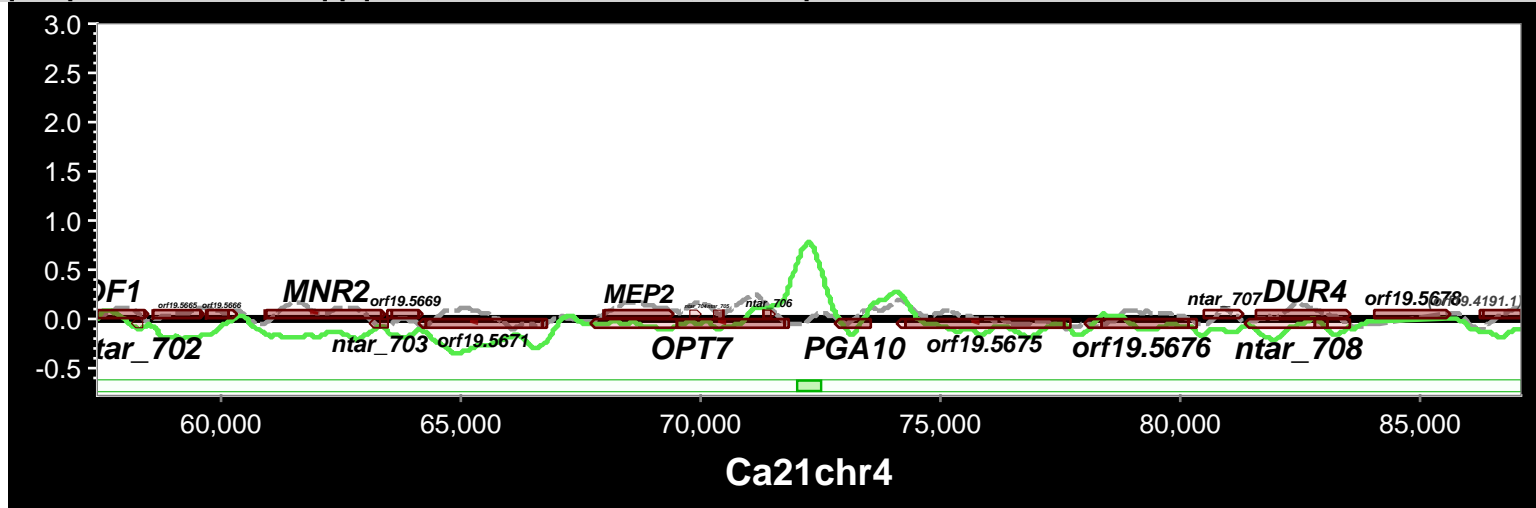

[0.768] Ca21chr7:894536-924219 [+] [orf19.7152, orf19.7153, UTP18, orf19.7151, FAA2-3]

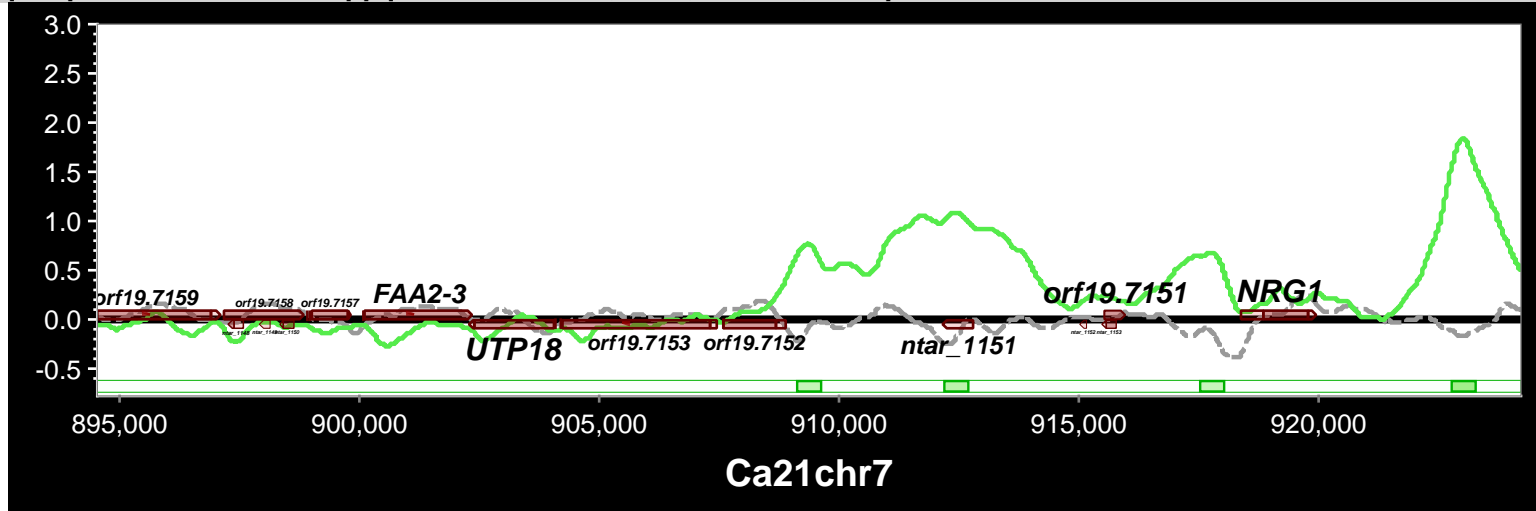

[0.759] Ca21chr7:283030-312713 [+] [orf19.6586, orf19.6585, orf19.6587, orf19.6588, PRT1]

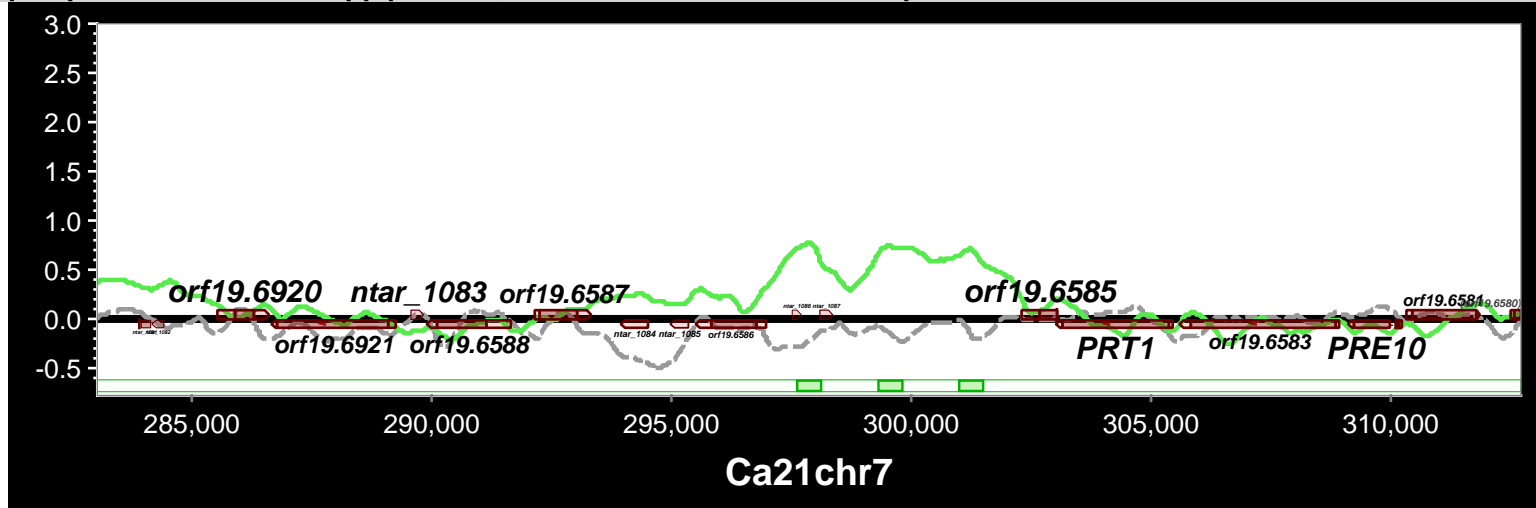

[0.758] Ca21chr1:1484961-1514644 [+] [RBT4, orf19.6203, orf19.6200, orf19.6205, orf19.6199]

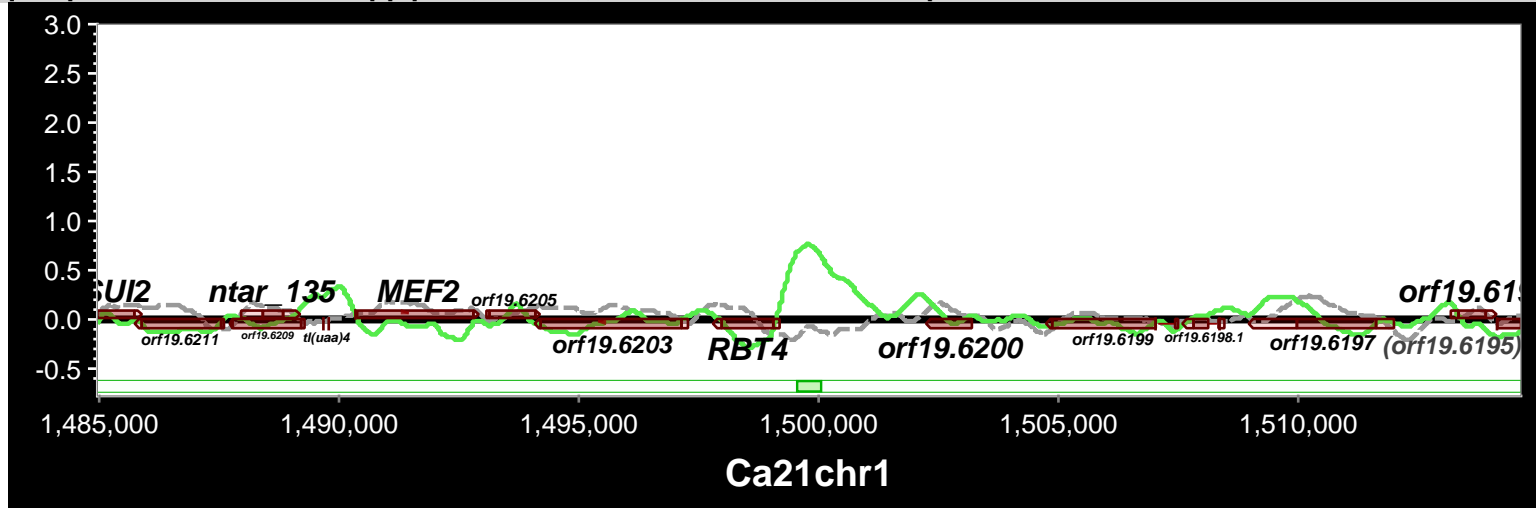

[0.754] Ca21chr2:1349409-1379092 [+] [FRP3, orf19.1225, DBF2, AMO2, orf19.81]

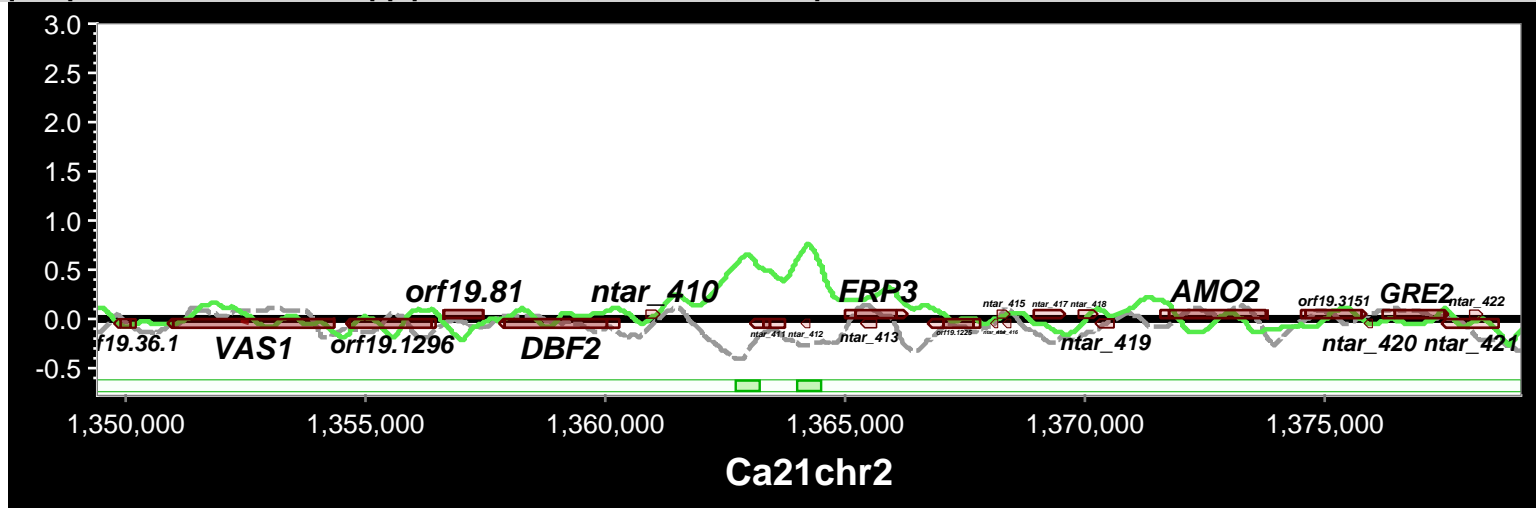

[0.749] Ca21chr3:719699-749382 [+] [orf19.344, orf19.345, BMT7, orf19.341, orf19.346]

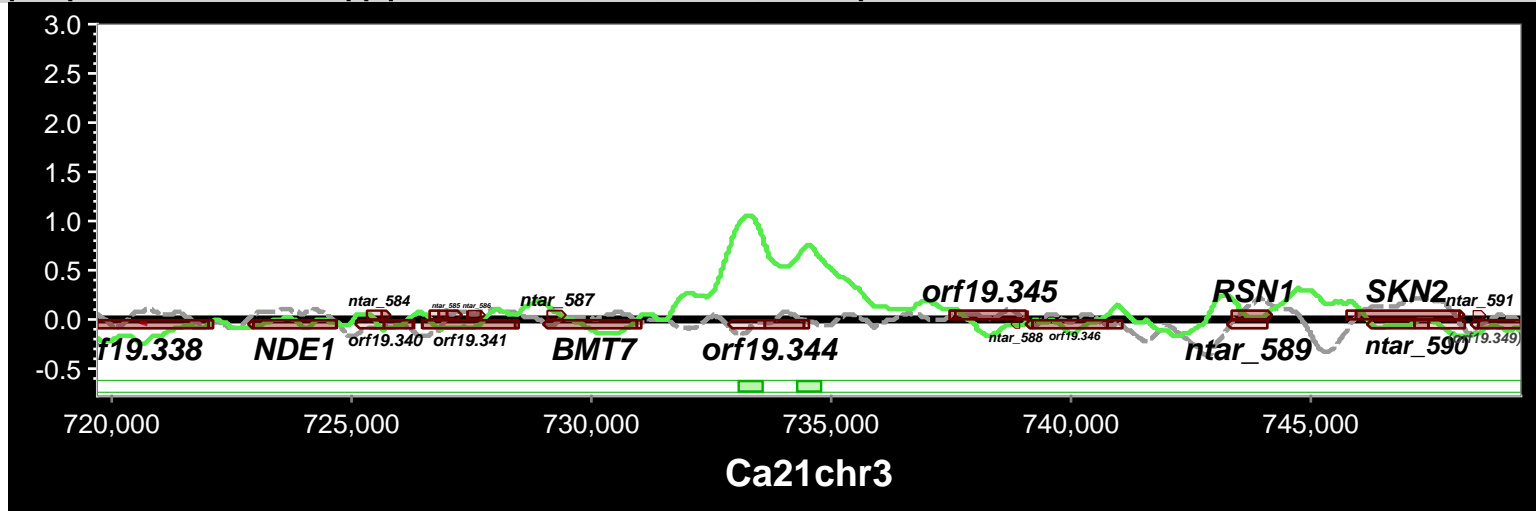

[0.748] Ca21chr7:438731-468414 [+] [CUP9, EXO70, LIG1, GRX1, orf19.6509]

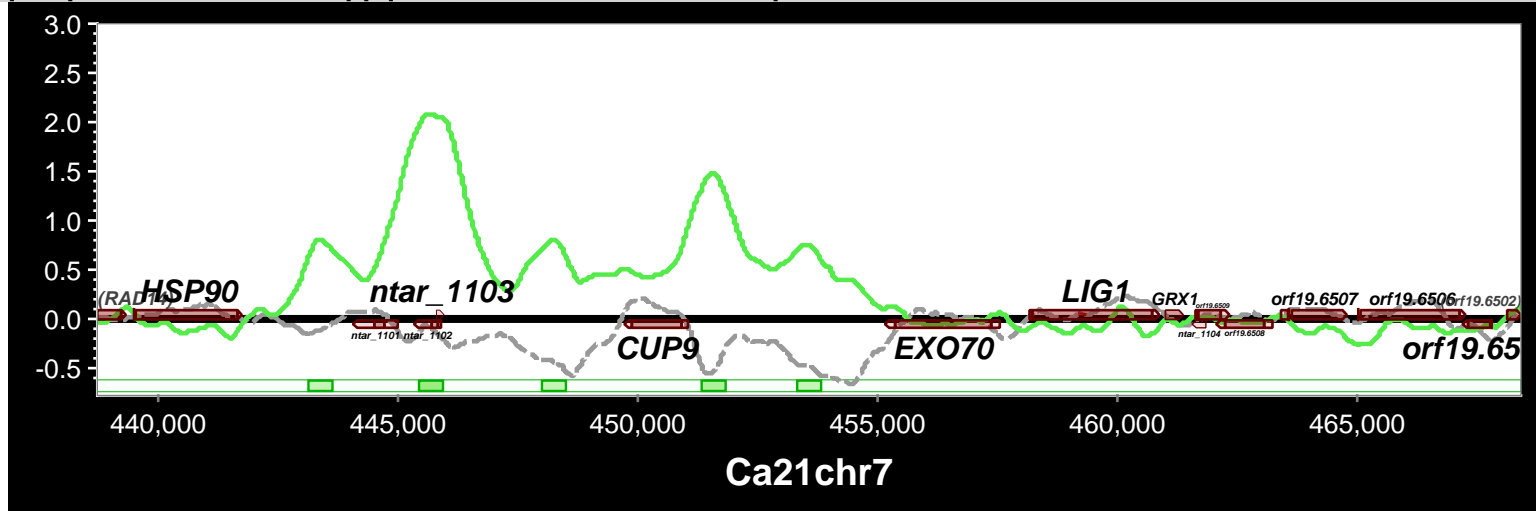

[0.741] Ca21chr7:284725-314408 [+] [orf19.6586, orf19.6585, PRT1, orf19.6587, orf19.6588]

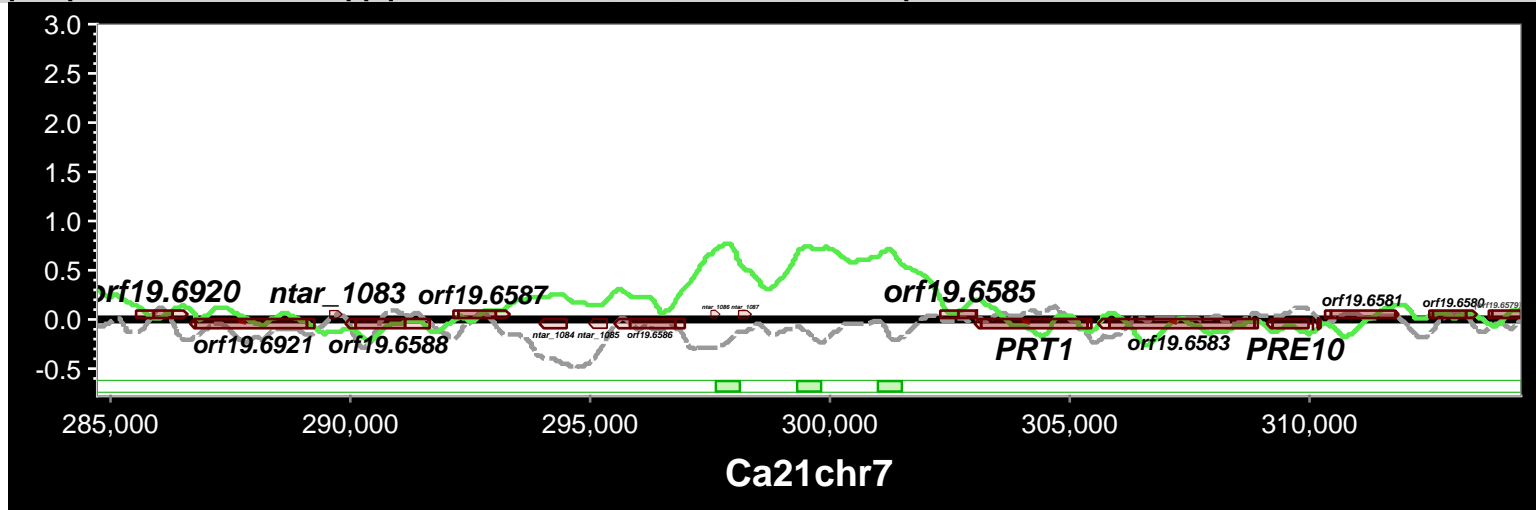

[0.729] Ca21chr2:509946-539629 [+] [ZRT2, FGR22, HGT20, orf19.1584, orf19.1588]

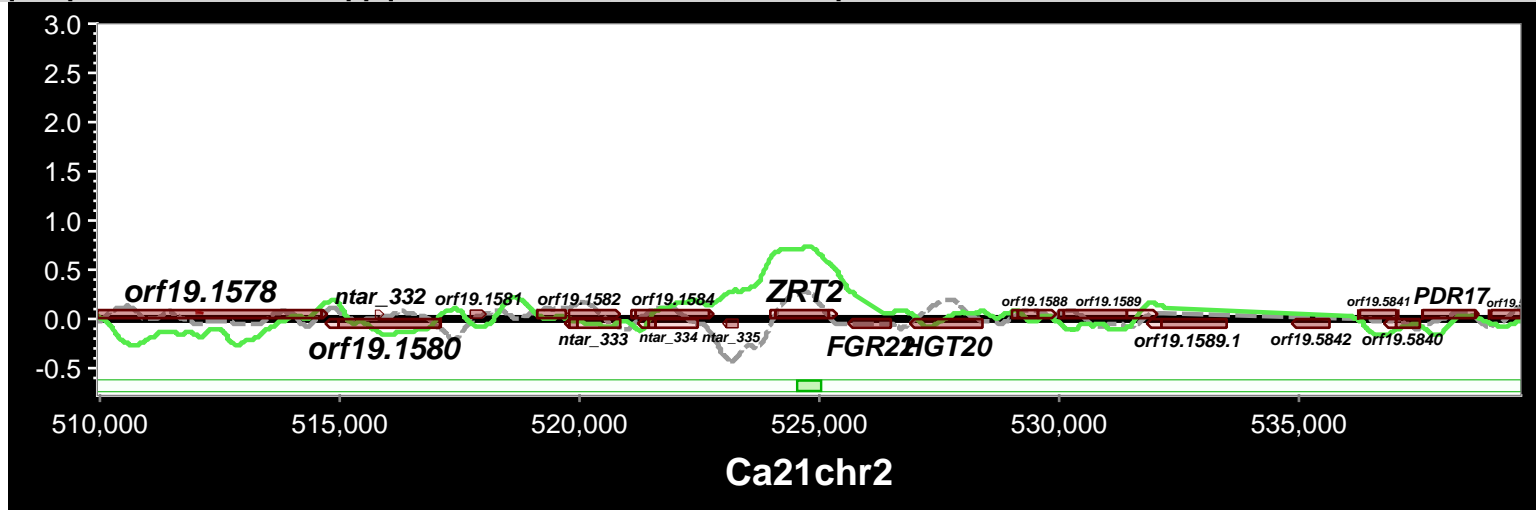

[0.728] Ca21chr5:84543-114226 [+] [orf19.938, NAM7, BUD2, orf19.936, SEC14]

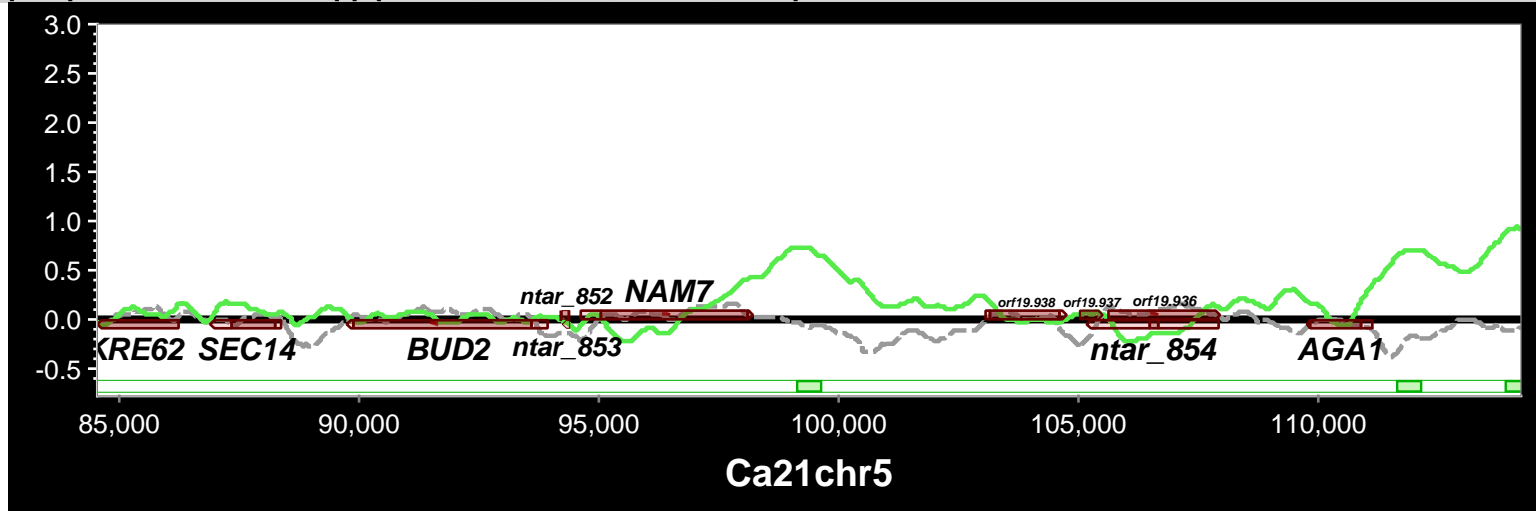

[0.727] Ca21chr2:1118686-1148369 [+] [orf19.6869, orf19.6871, orf19.6868, orf19.6867, orf19.6866]

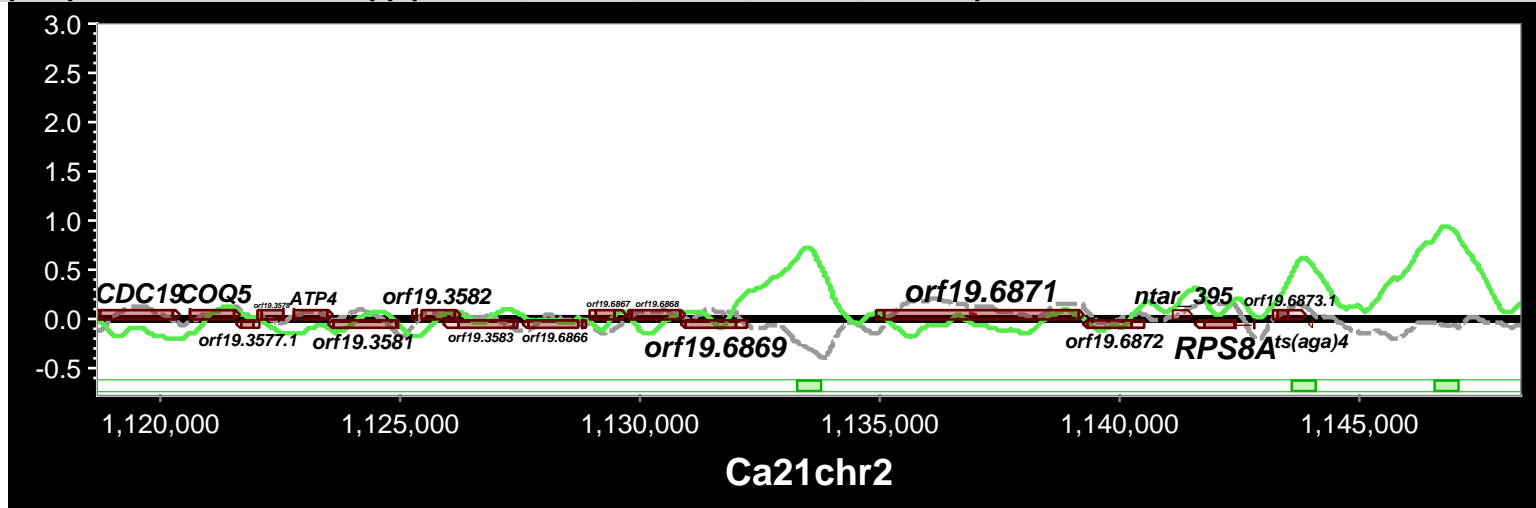

[0.727] Ca21chr3:1218056-1247739 [+] [tV(AAC)6, tV(AAC)5, SNR6, orf19.6986, TEA1]

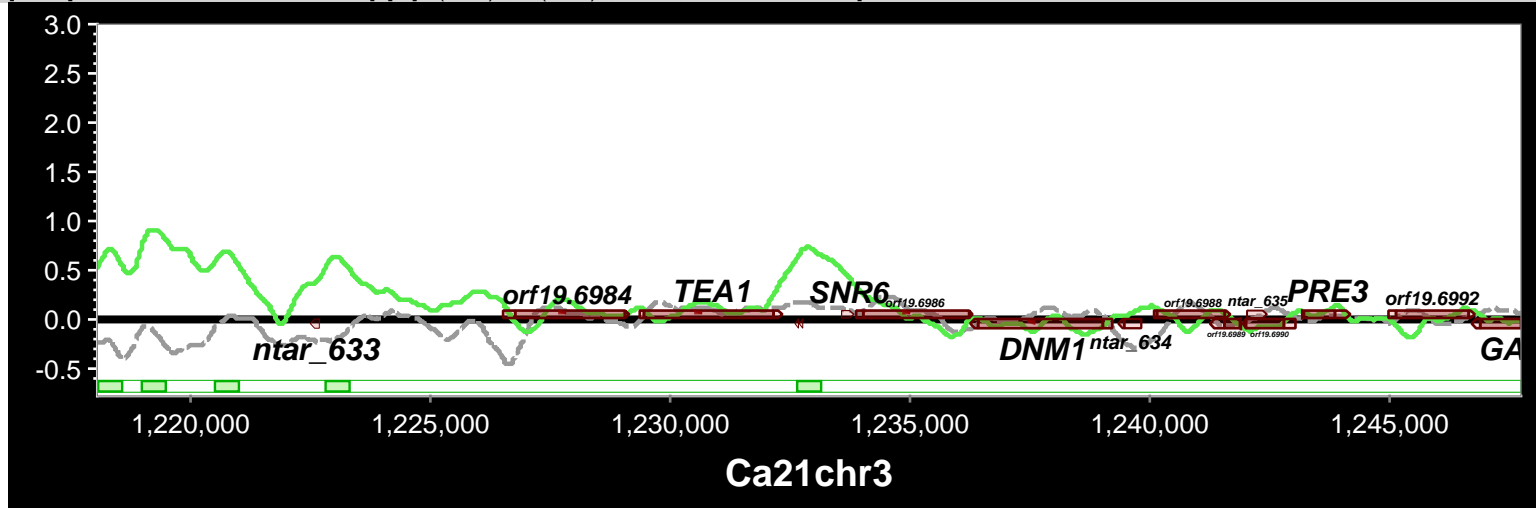

[0.721] Ca21chr5:514500-544183 [+] [orf19.4246, orf19.4245, orf19.4247, orf19.4248, orf19.4244]

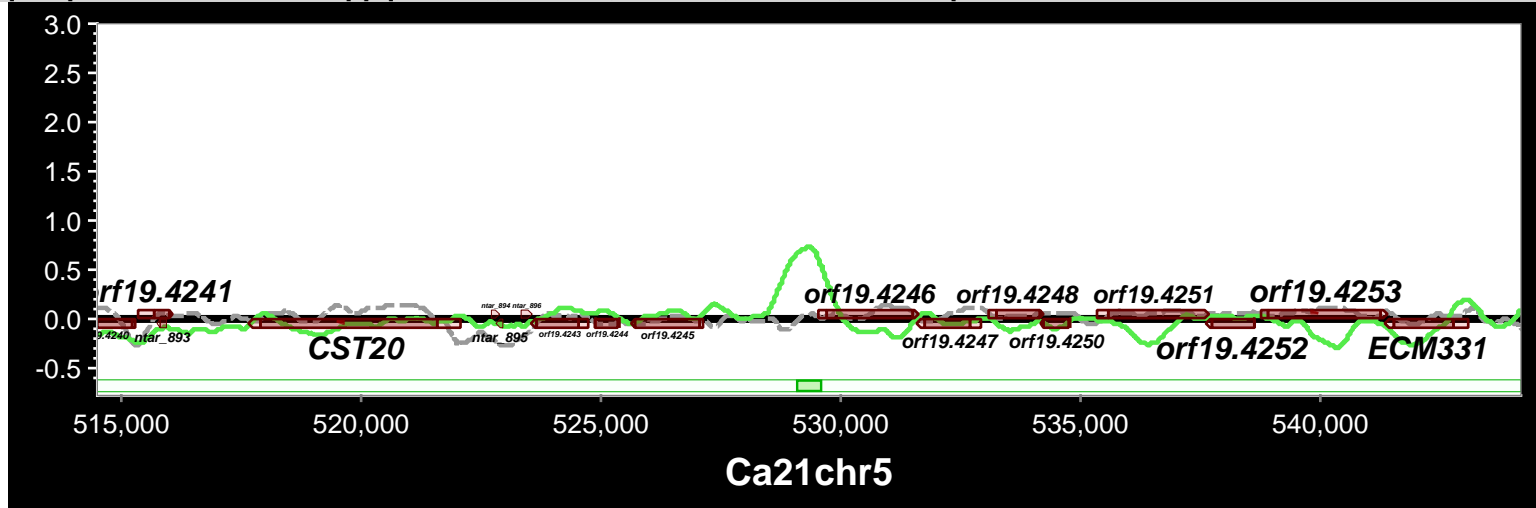

[0.719] Ca21chr1:3046135-3075818 [+] [tA(AGC)7, LCB2, orf19.5026, MODF, orf19.5030]

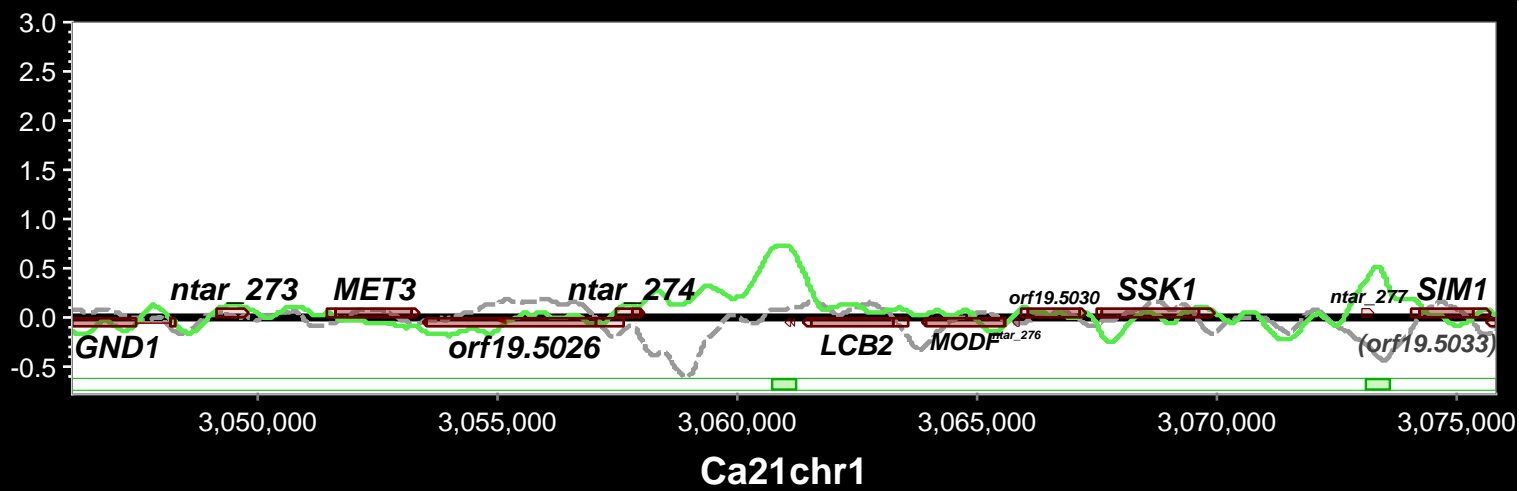

[0.719] Ca21chr6:636301-665984 [+] [SHE3, orf19.5592, ADO1, orf19.5596, POL5]

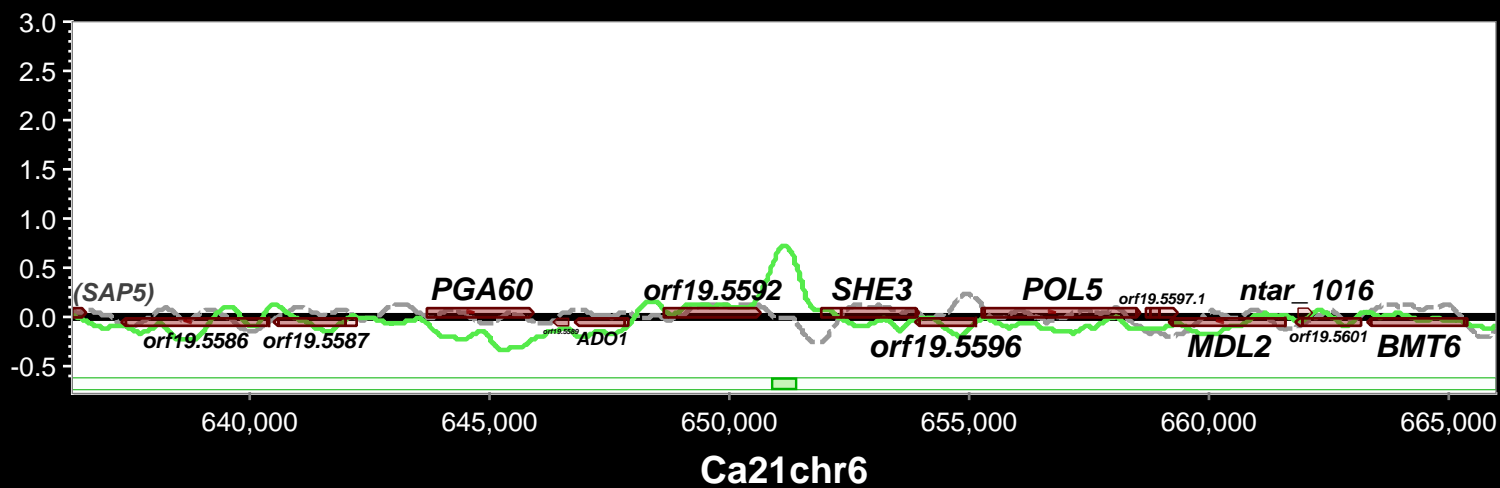

[0.718] Ca21chr3:1203482-1233165 [+] [orf19.6983, orf19.6982, orf19.6984, orf19.6981, TEA1]

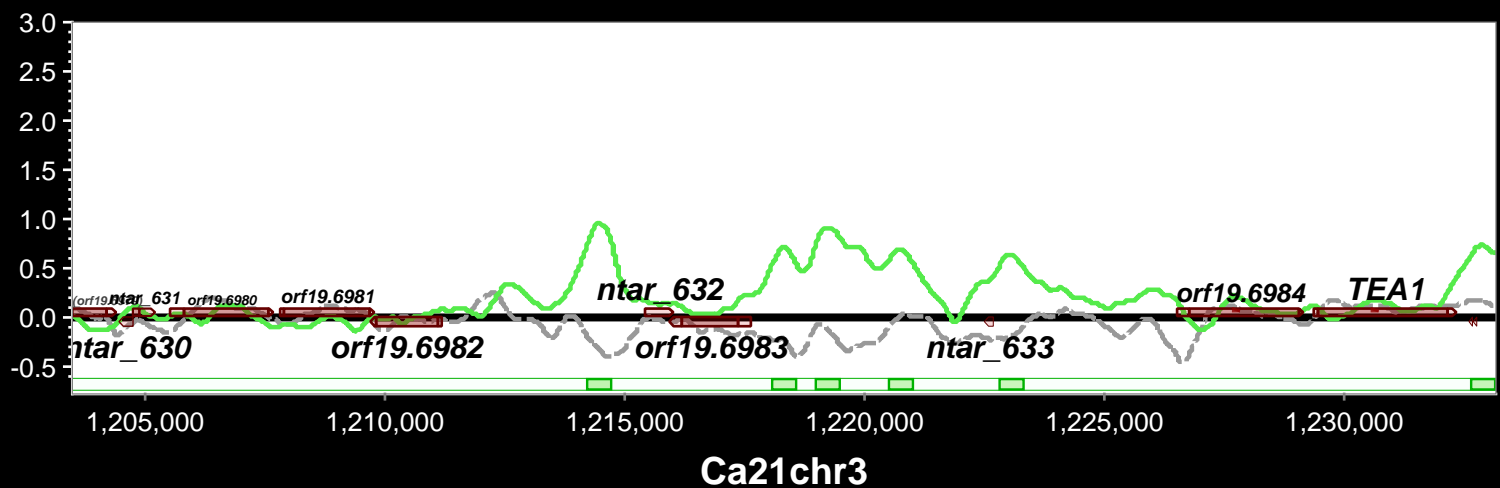

[0.714] Ca21chrR:1215209-1244892 [+] [tP(UGG)4, tP(UGG)5, orf19.6630, ACO2, ISC1]

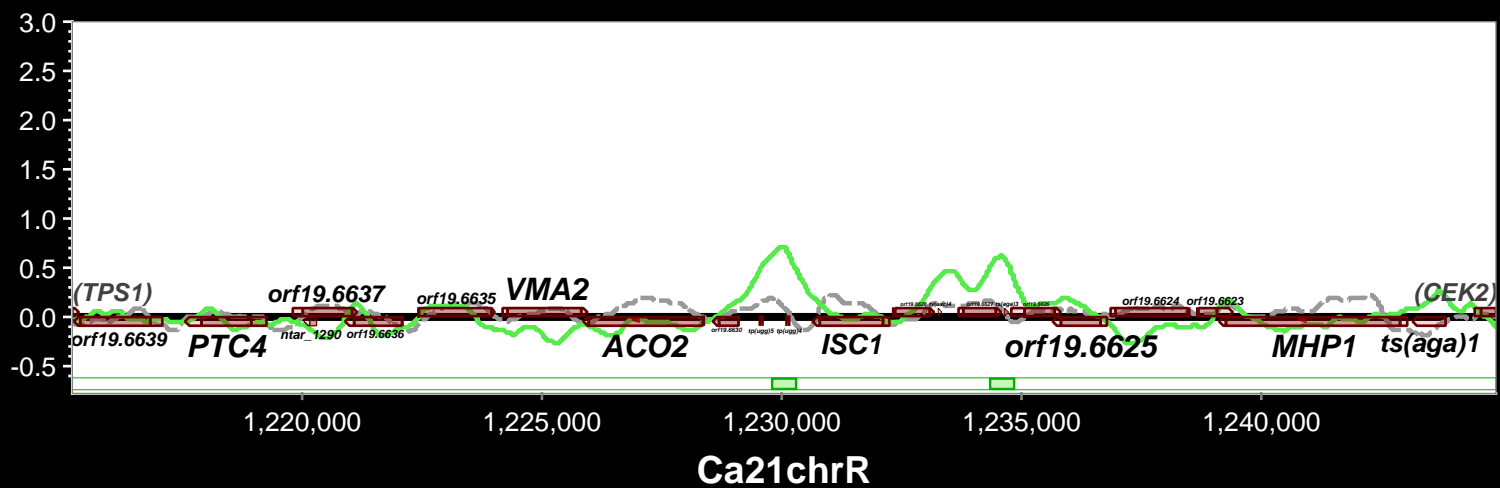

[0.71] Ca21chrR:1772633-1802316 [+] [tk(UUU)3, tk(UUU)4, tk(UUU)5, ACO1, orf19.6382]

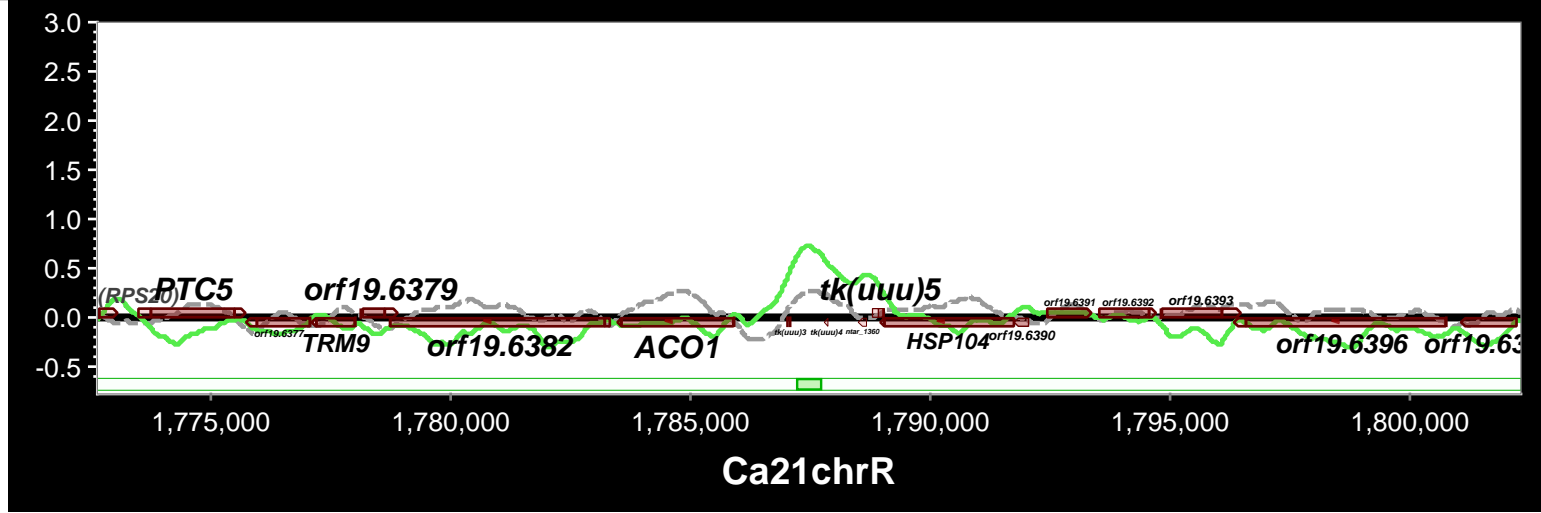

[0.709] Ca21chr7:286408-316091 [+] [orf19.6585, PRT1, orf19.6586, orf19.6583, PRE10]

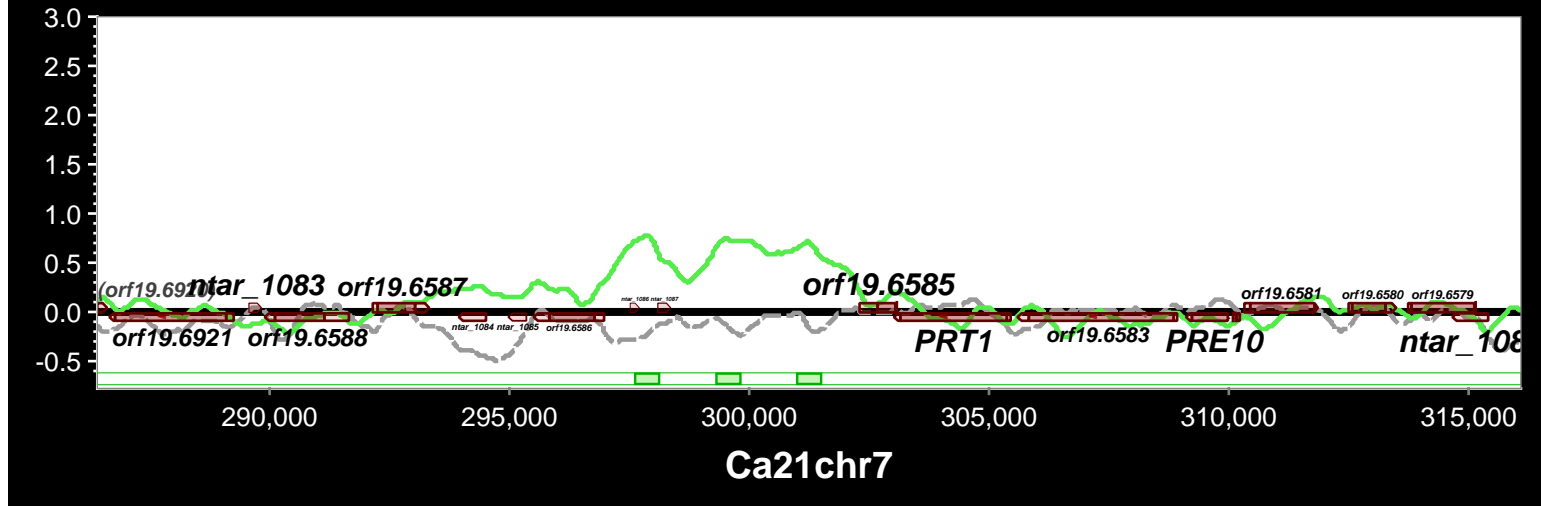

[0.706] Ca21chr5:97053-126736 [+] [AGA1, orf19.936, orf19.938, orf19.934, orf19.933]

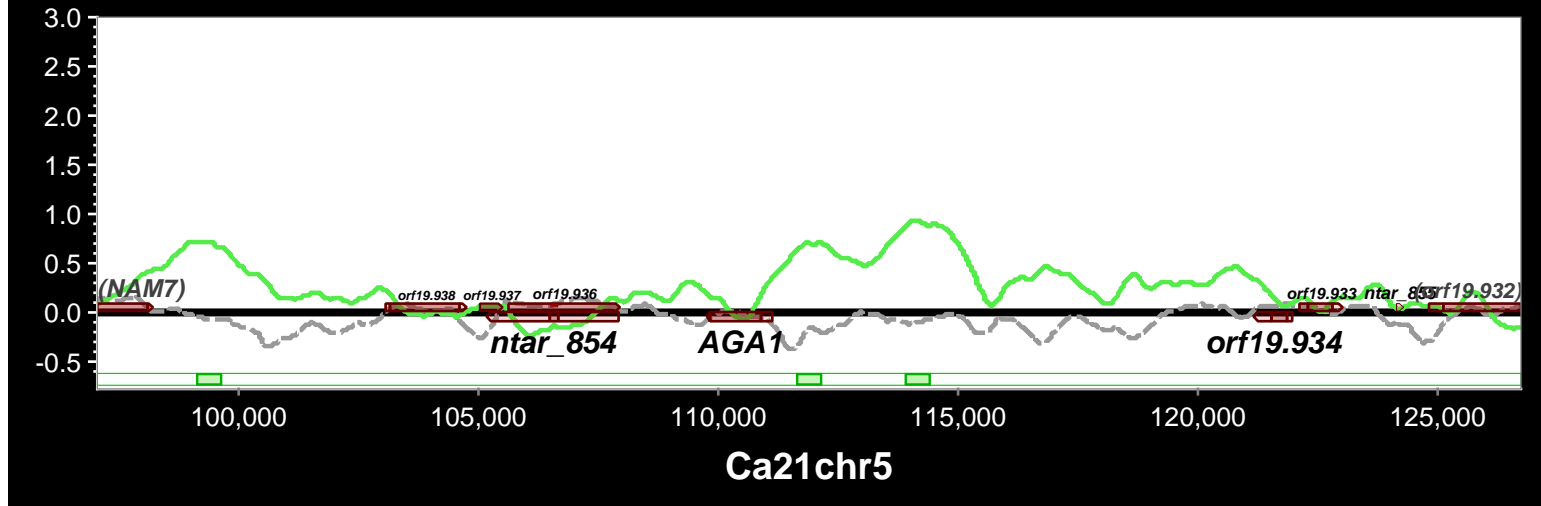

[0.7] Ca21chr3:1205917-1235600 [+] [orf19.6983, orf19.6984, TEA1, orf19.6982, tv(AAC)5]

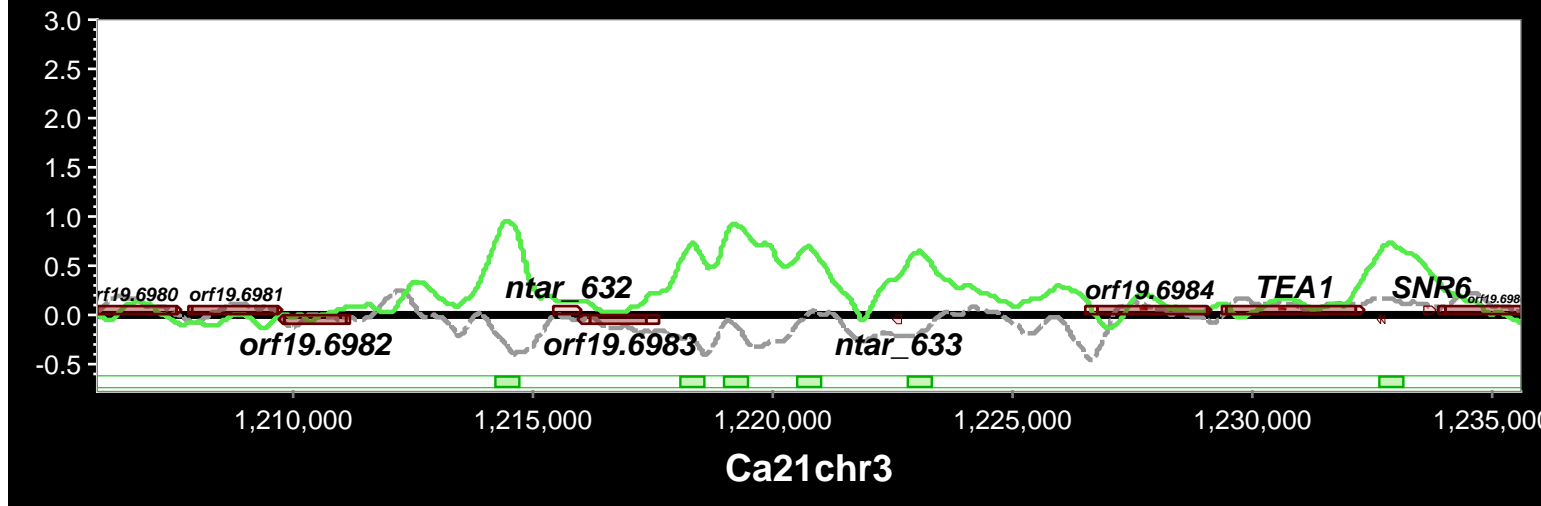



[0.697] Ca21chr3:1674100-1703783 [+] [GCY1, orf19.6756, orf19.6758, orf19.6755, orf19.6759]

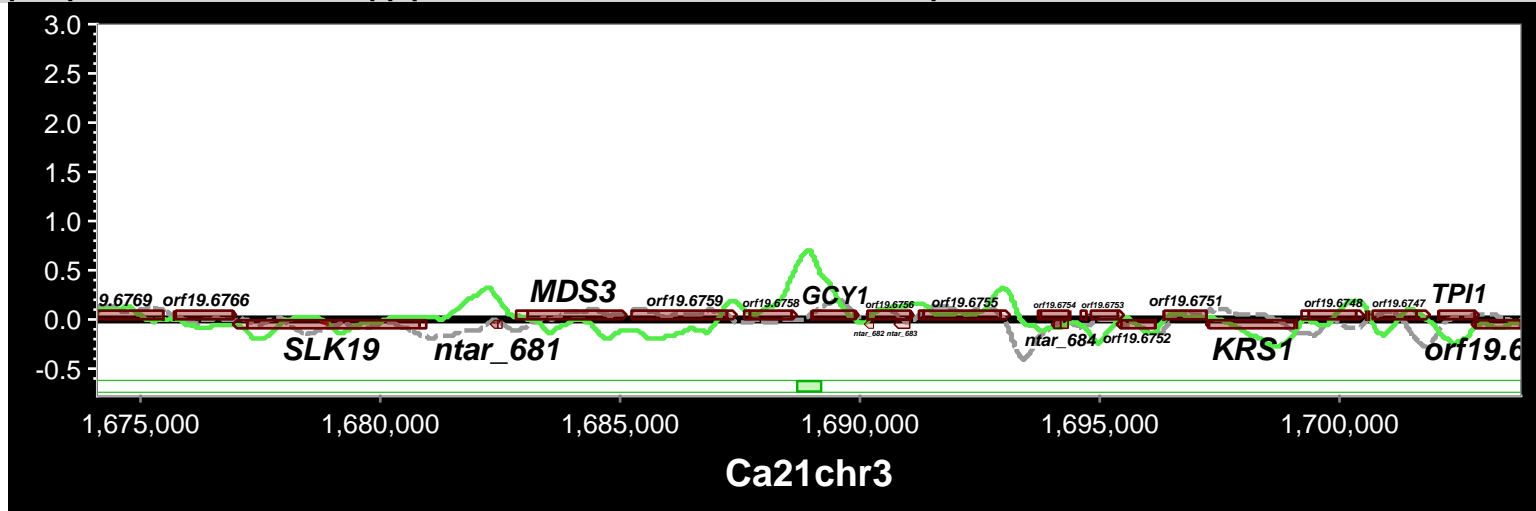

[0.696] Ca21chr3:577418-607101 [+] [tR(UCU)1, tF(GAA)1, orf19.265, orf19.264, orf19.263.1]

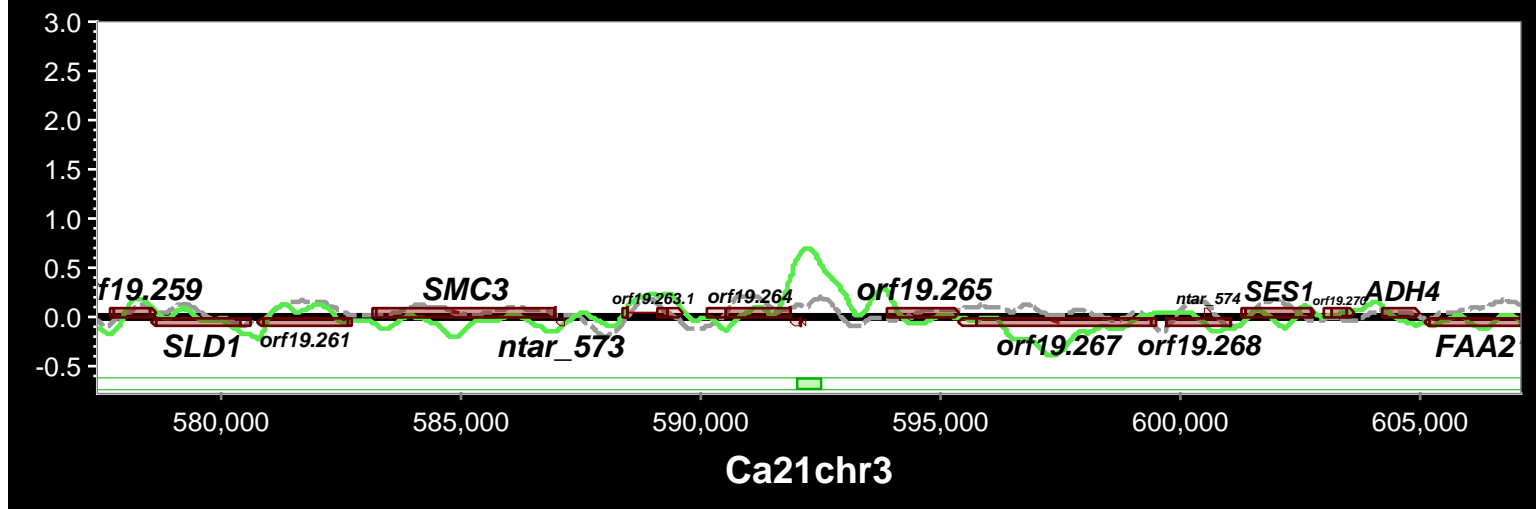

[0.695] Ca21chr3:1700851-1730534 [+] [tR(UCU)5, tF(GAA)5, SNR52, orf19.6737, VAN1]

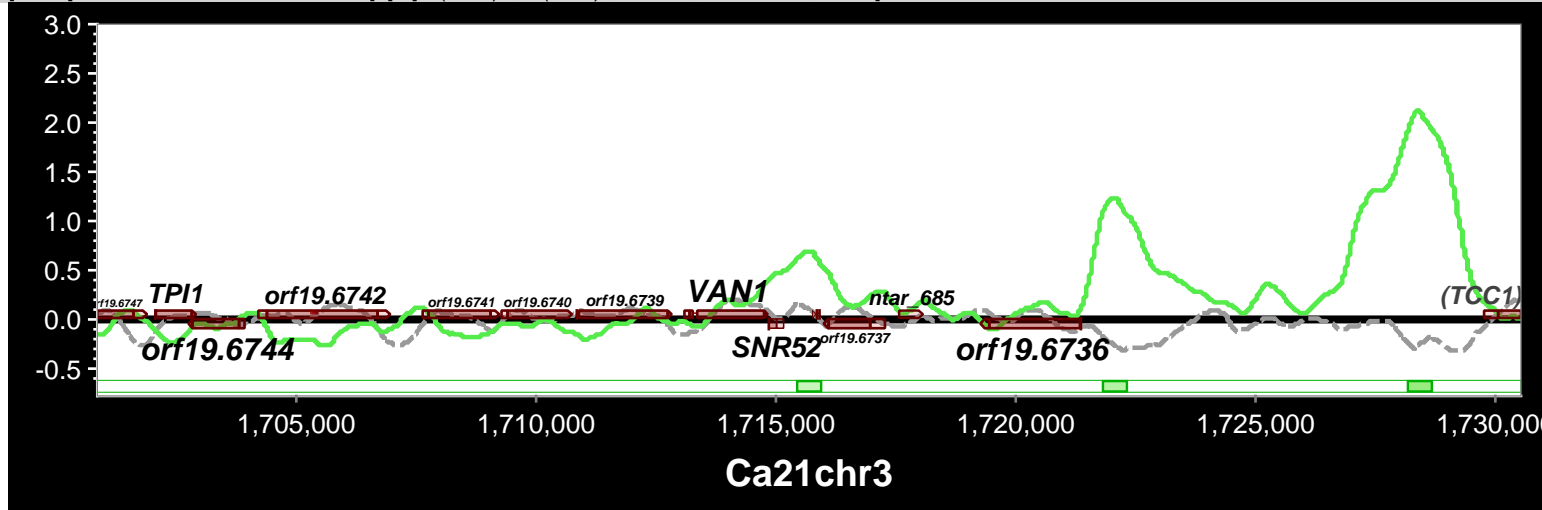

[0.691] Ca21chr4:560575-590258 [+] [HIT1, orf19.2724, CGR1, orf19.2721, orf19.2720]

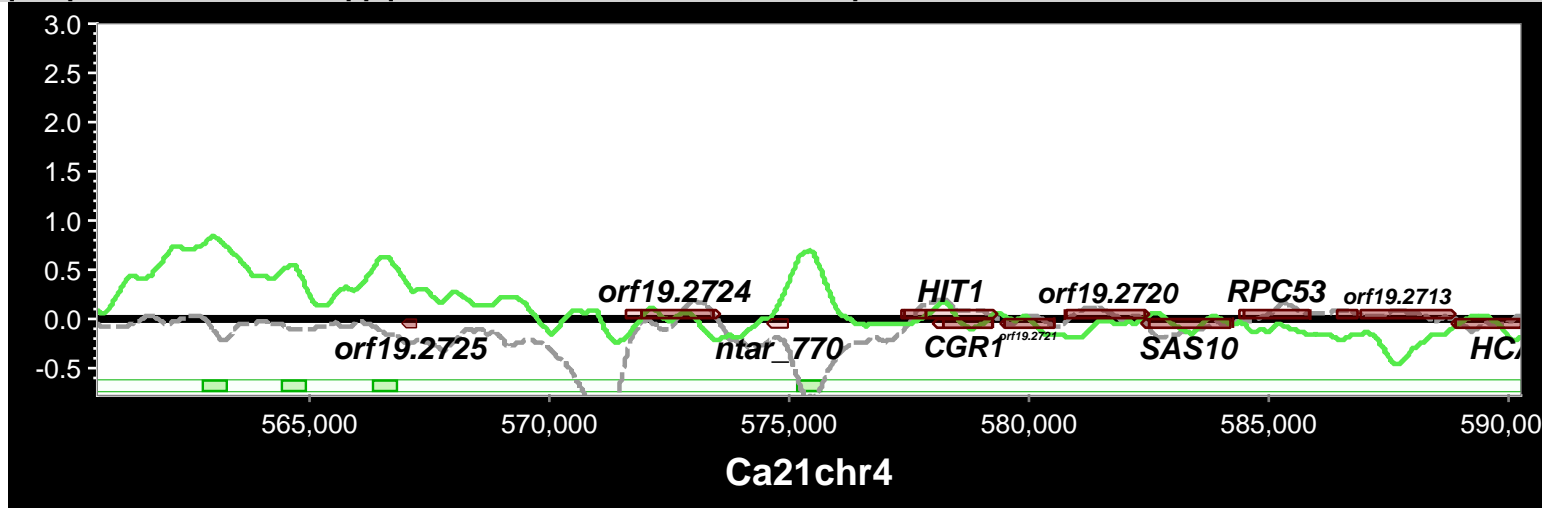

[0.679] Ca21chr1:2387921-2417604 [+] [orf19.2332, orf19.2333, ADA2, RPS17B, BIG1]

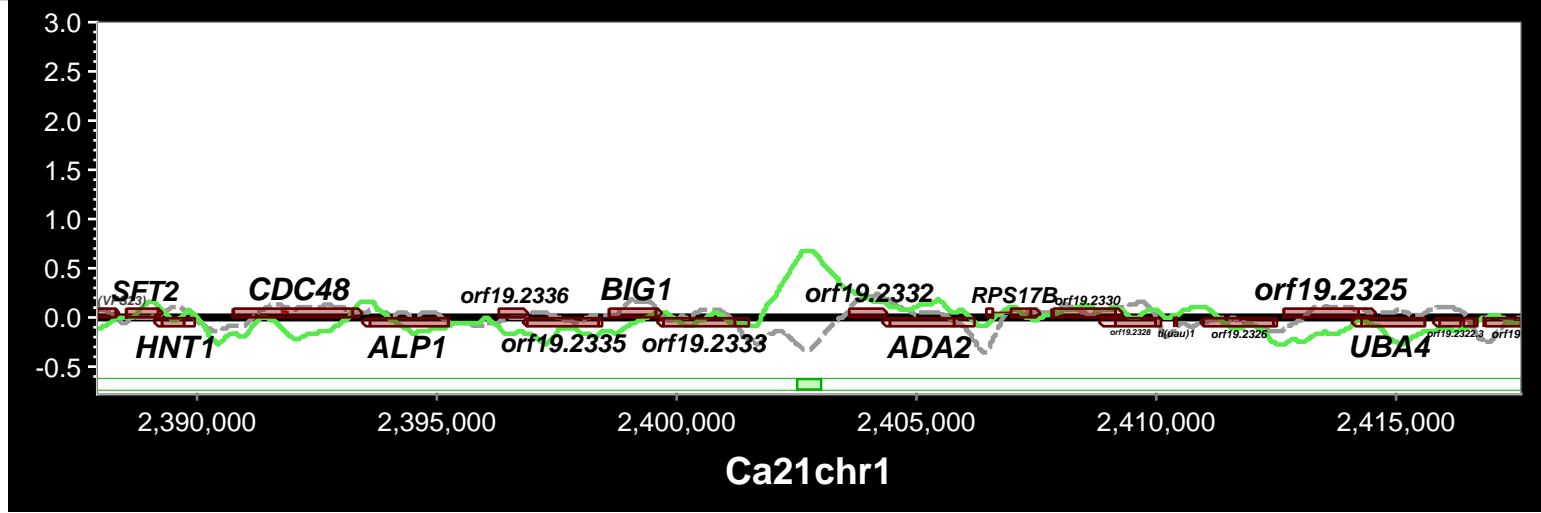

[0.679] Ca21chr3:1455396-1485079 [+] [th(GUG)3, GLG2, orf19.7433, AAF1, APN1]

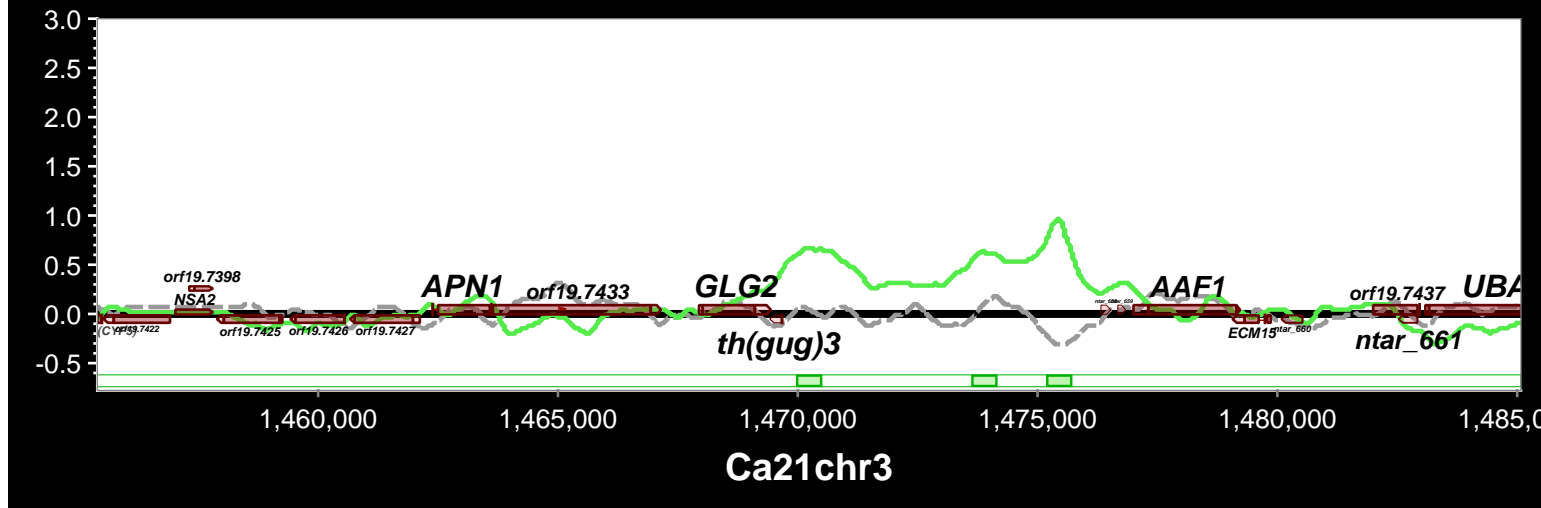

[0.676] Ca21chr7:902939-932622 [+] [NRG1, orf19.7151, orf19.7149, orf19.7152, orf19.7153]

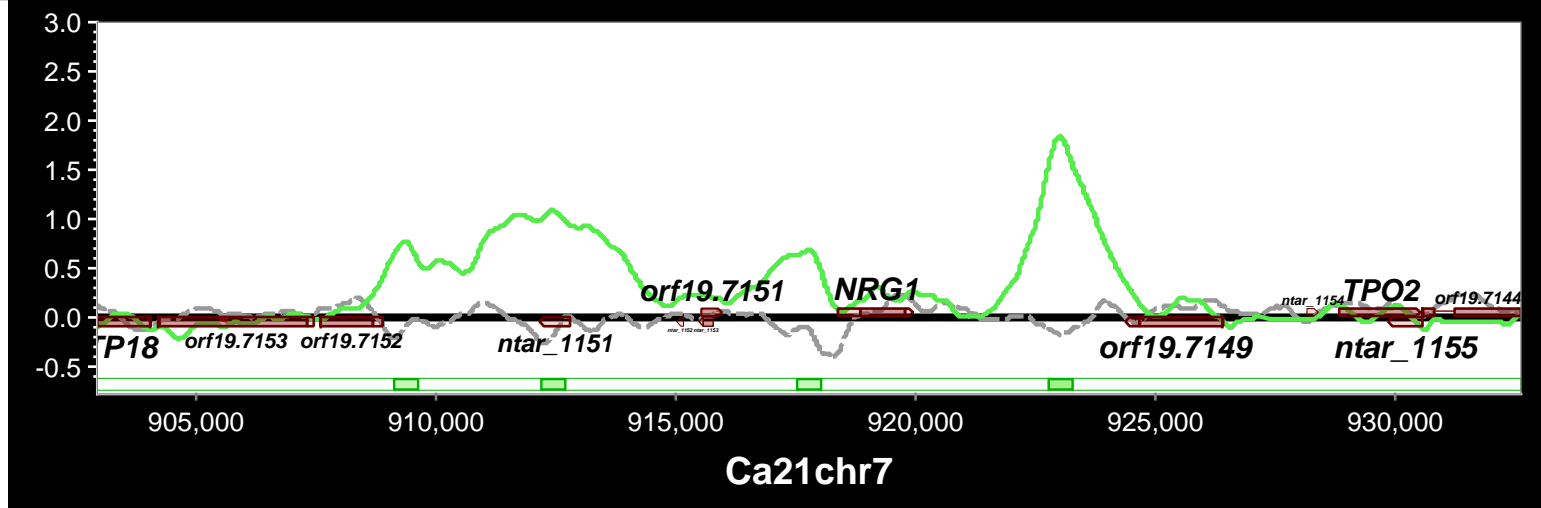

[0.676] Ca21chrR:1674628-1704311 [+] [YHB1, SAP2, orf19.3706, PTC6, orf19.3704.1]

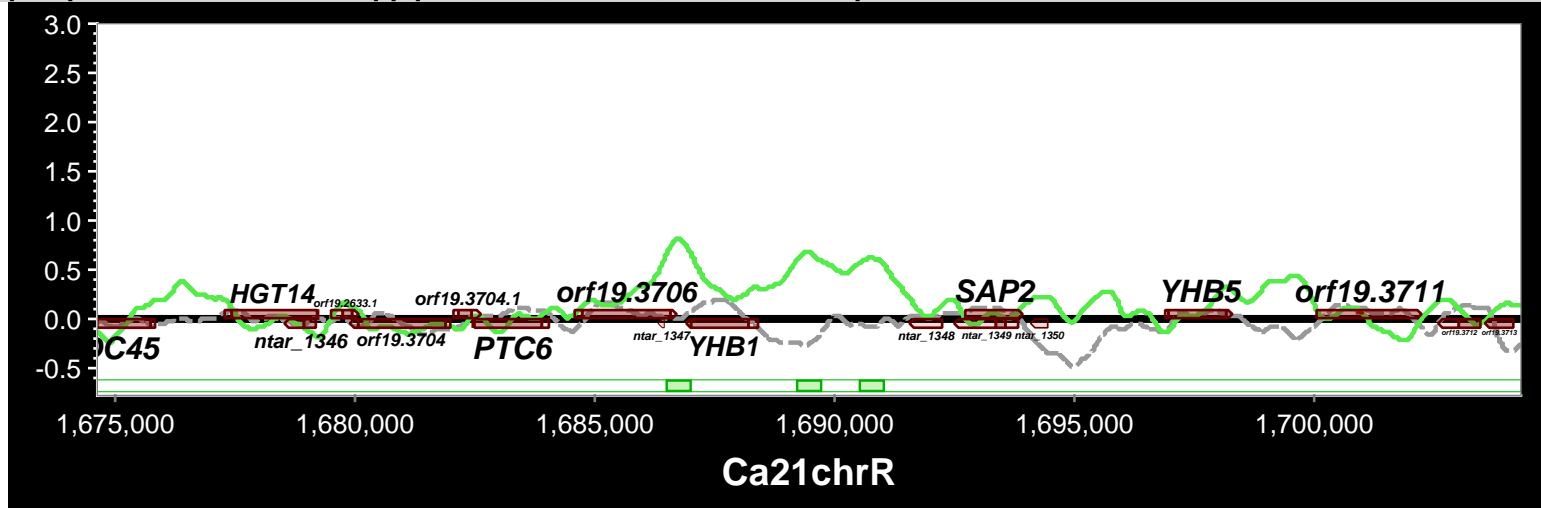

[0.674] Ca21chr1:2214688-2244371 [+] [WOR1, MIR1, orf19.4883, orf19.4886, orf19.4882]

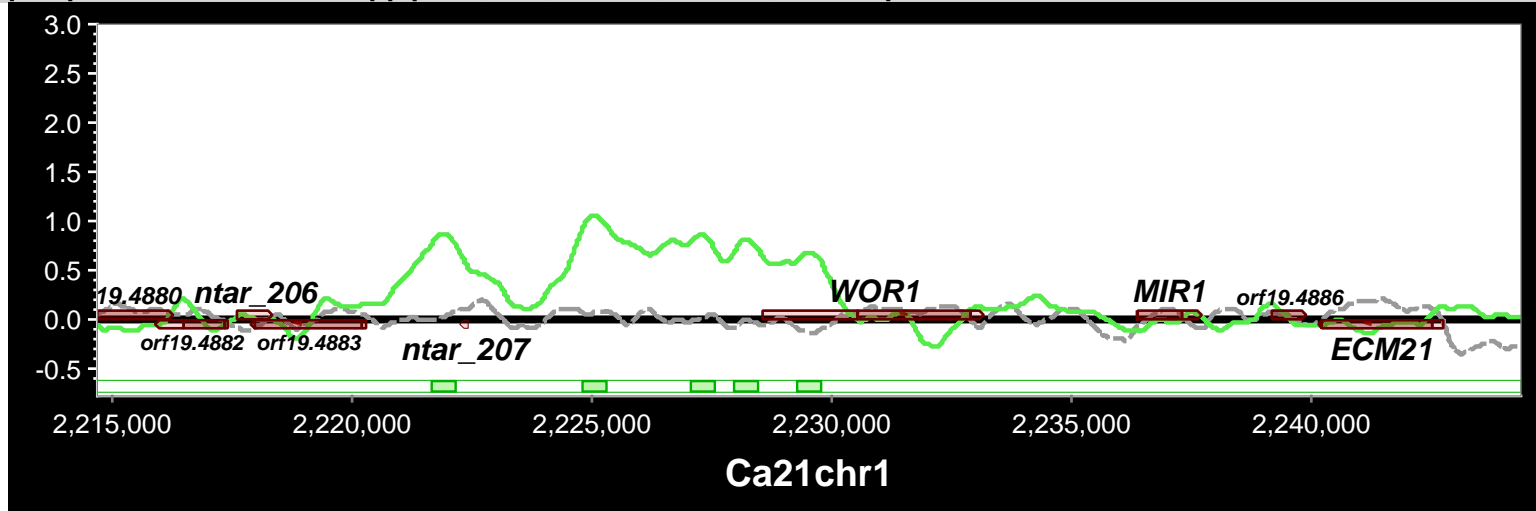

[0.673] Ca21chrR:1698855-1728538 [+] [tG(GCC)1, orf19.612, ASF1, orf19.3714, orf19.3713]

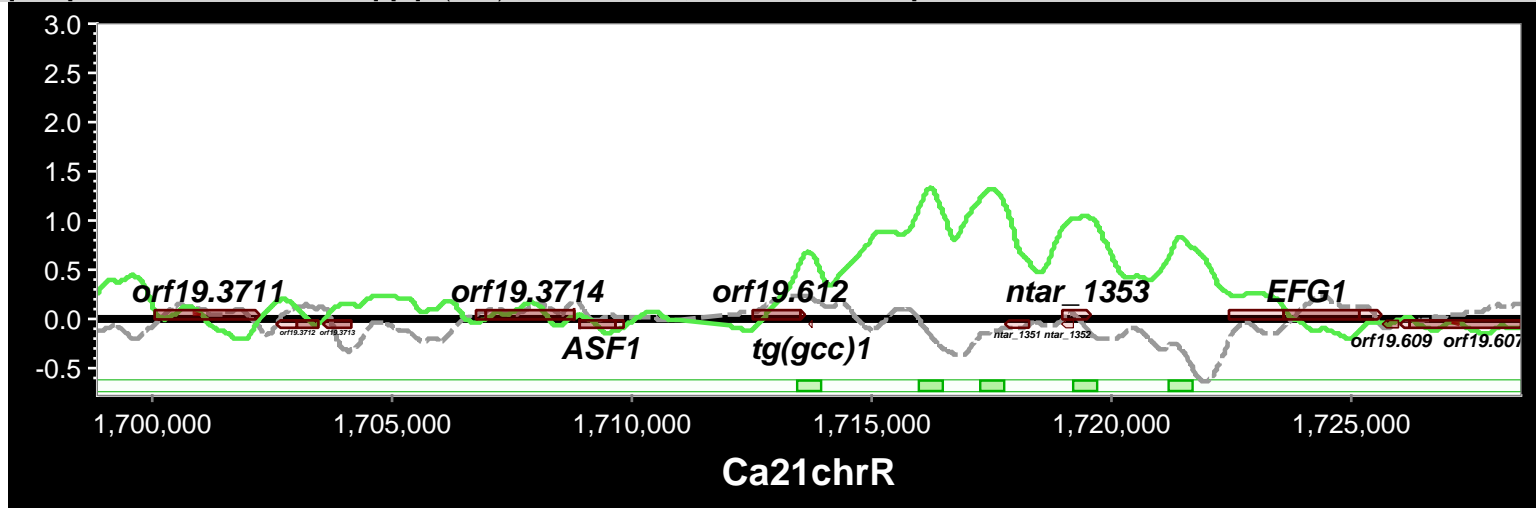

[0.671] Ca21chr1:441349-471032 [+] [GAL102, GAL7, orf19.3673, ABP140, orf19.3677]

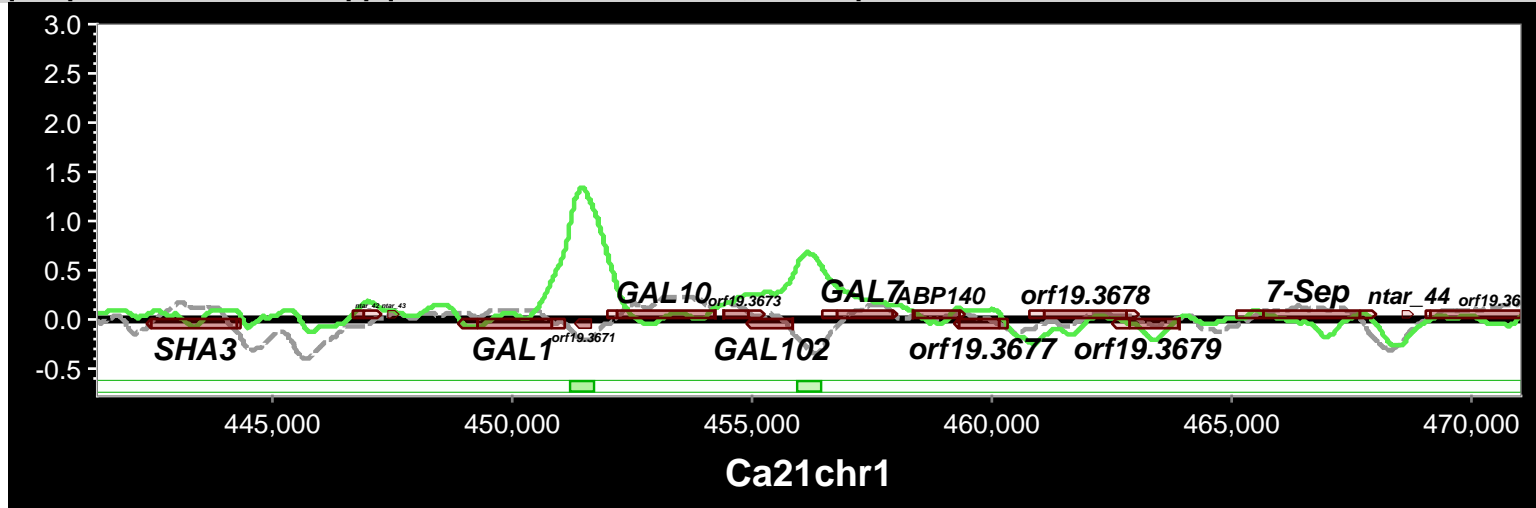

[0.669] Ca21chr1:2669389-2699072 [+] [orf19.5233, RBD1, CSI2, orf19.5231.2, orf19.5231]

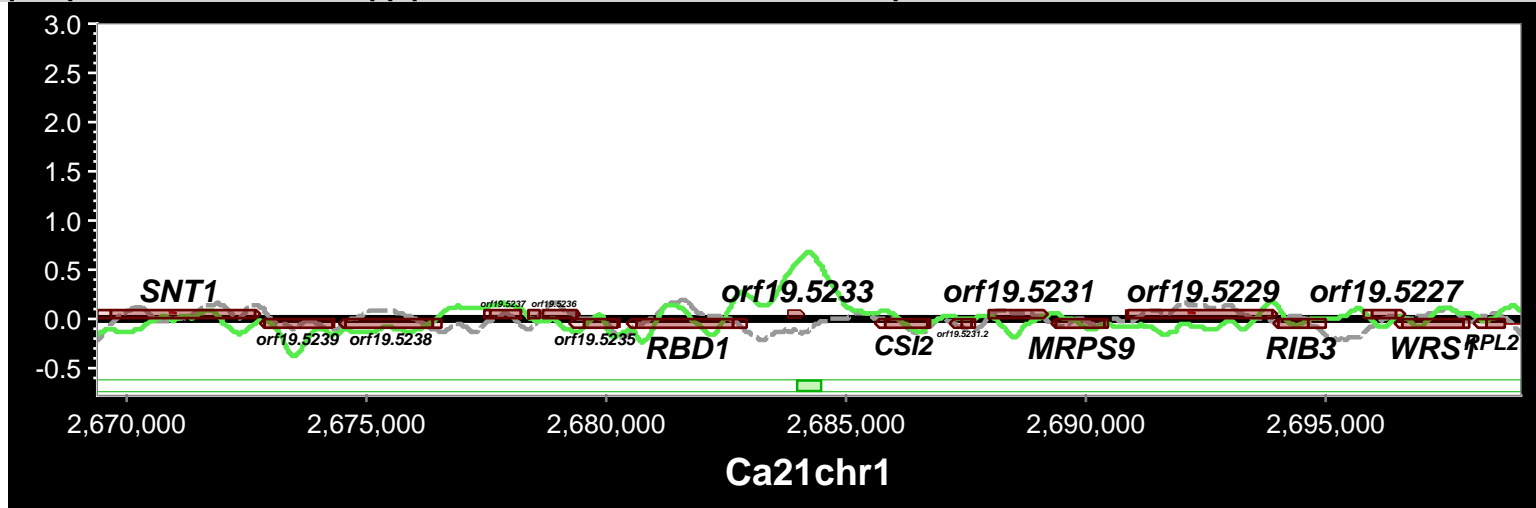

[0.664] Ca21chr2:2153469-2183152 [+] [tF(GAA)4, tV(UAC)1, MDH1-3, orf19.5322, KIN3]

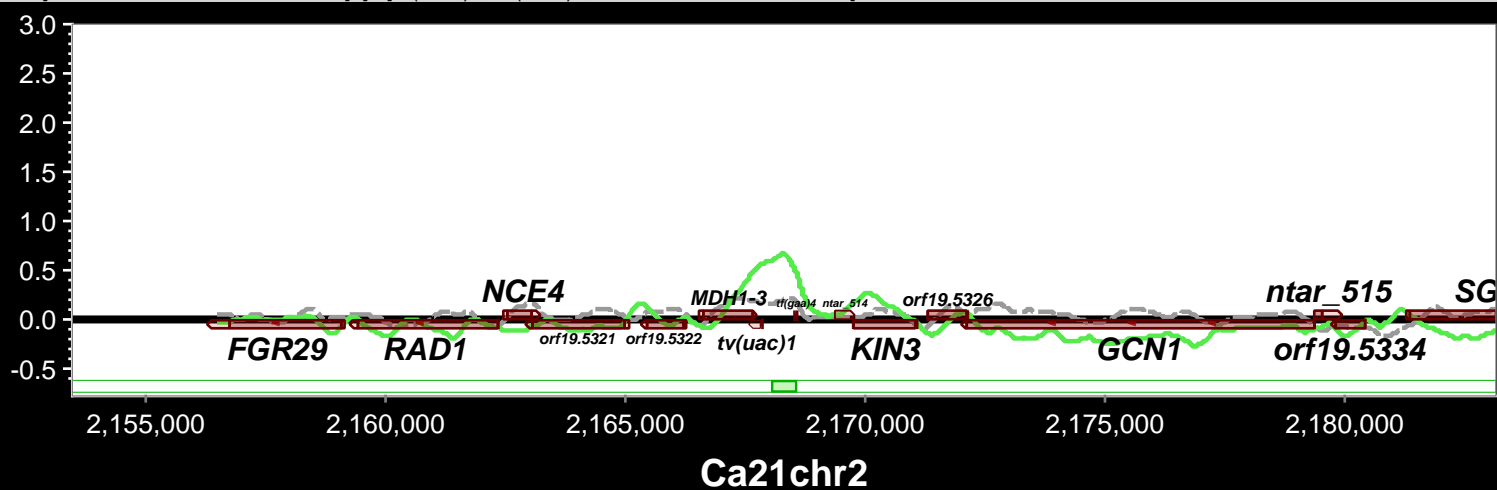

[0.658] Ca21chr4:231046-260729 [+] [tS(UGA)3, AAT22, orf19.4668, orf19.4666, CAS5]

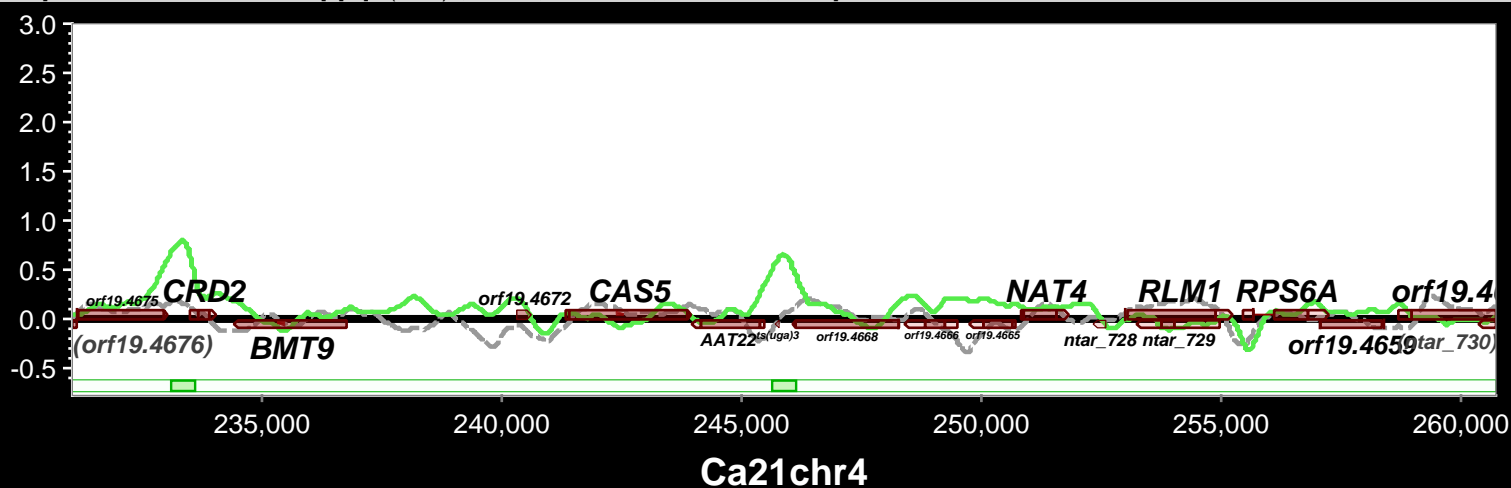

[0.657] Ca21chr5:222121-251804 [+] [orf19.1961, orf19.1963, CLN3, orf19.1964, BUD23]

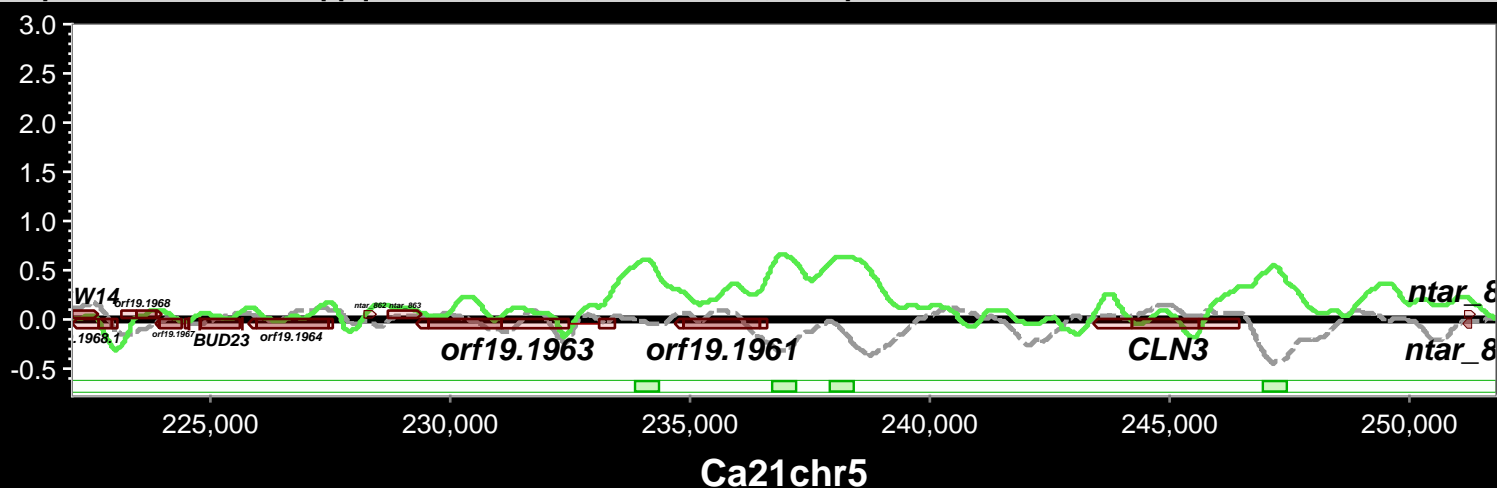

[0.653] Ca21chr3:941291-970974 [+] [TEC1, orf19.5910, CMK1, MAK21, ADE2]

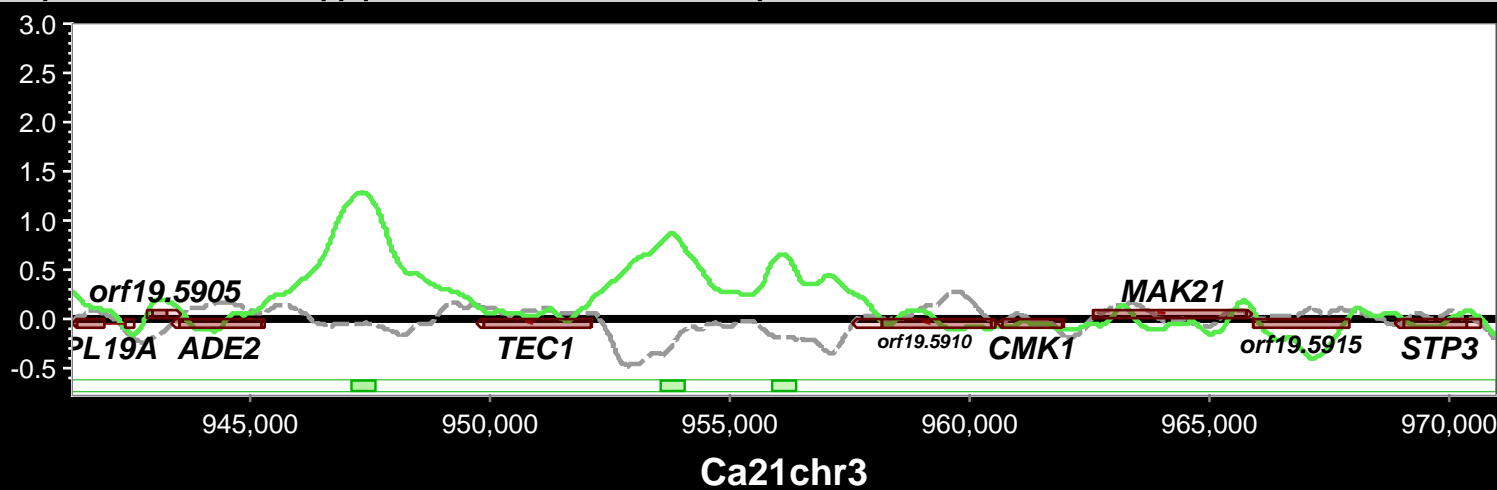

[0.648] Ca21chr7:55623-85306 [+] [orf19.7077, orf19.7078, orf19.7079, orf19.7076, orf19.7074]

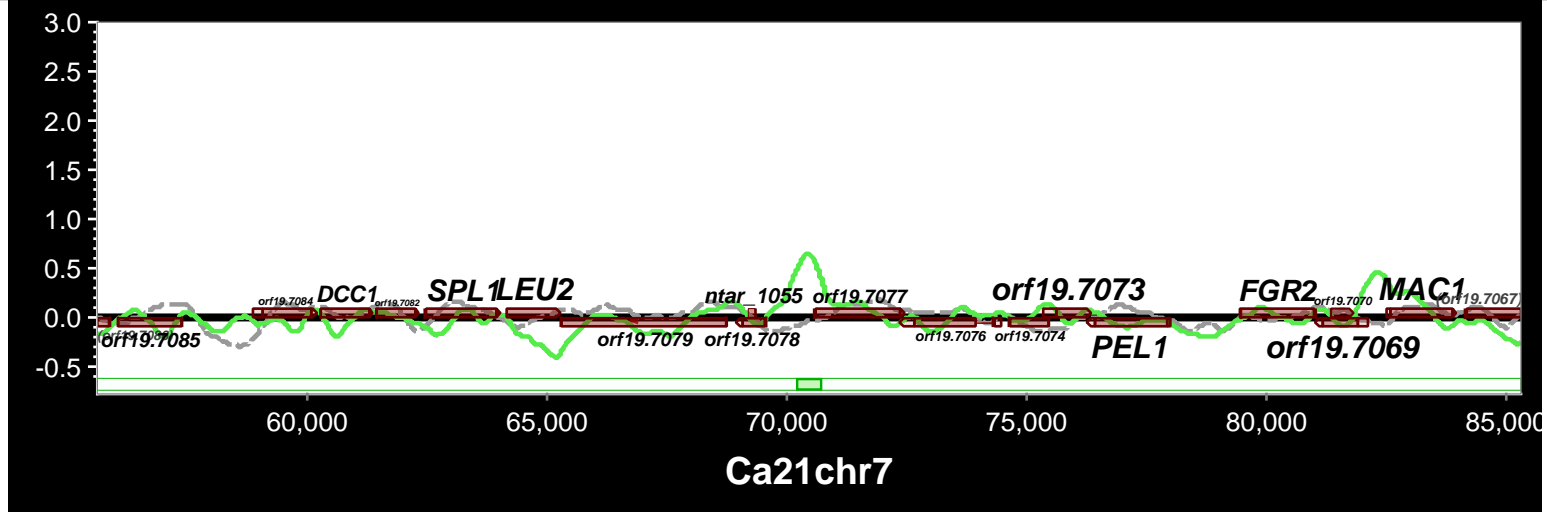

[0.647] Ca21chrR:856362-886045 [+] [IFF9, orf19.4358, orf19.4357, orf19.467, HGT3]

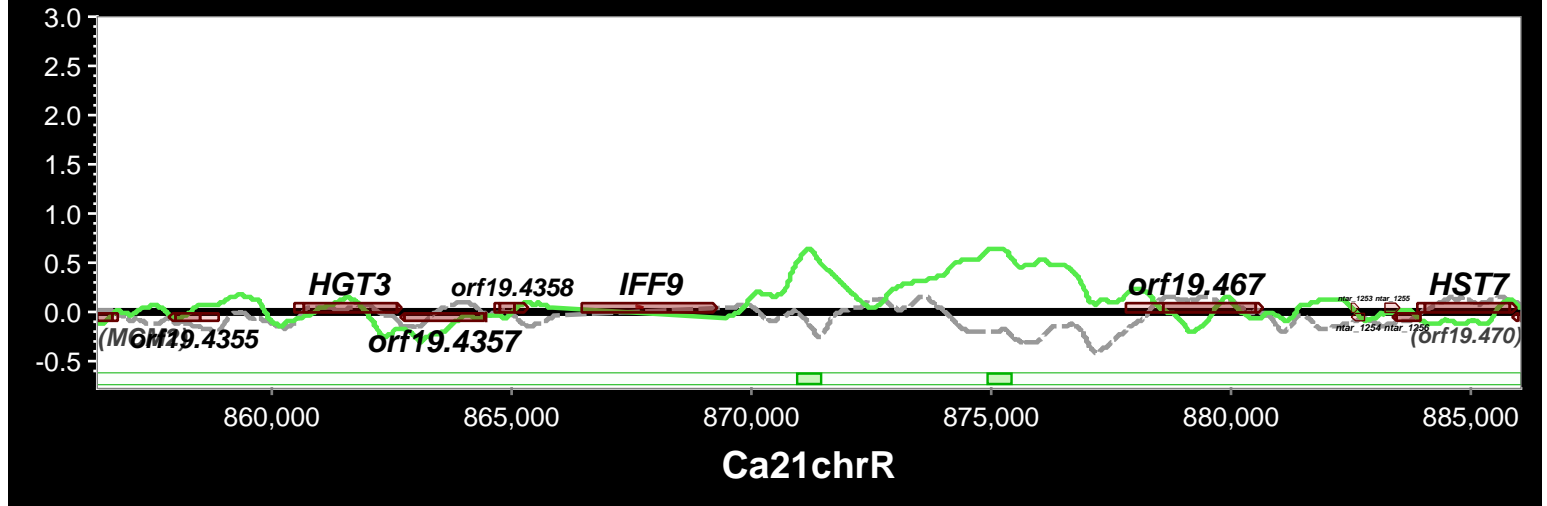

[0.646] Ca21chrR:860332-890015 [+] [orf19.467, IFF9, HST7, orf19.4358, orf19.4357]

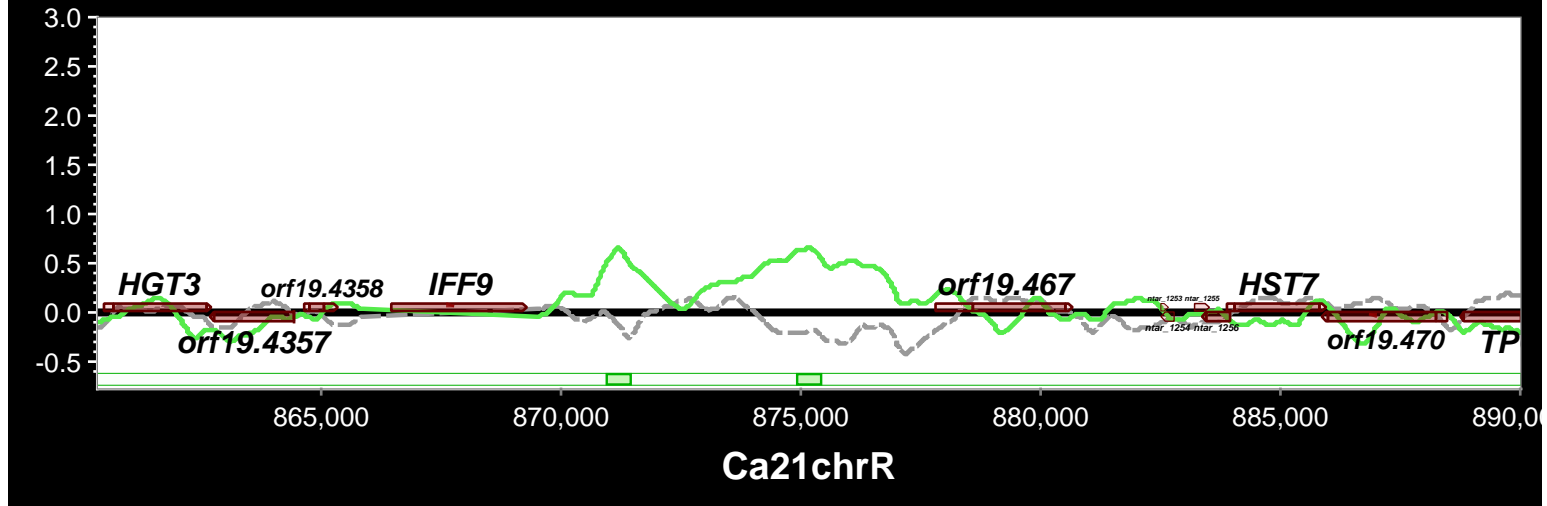

[0.644] Ca21chr5:223322-253005 [+] [orf19.1961, orf19.1963, CLN3, orf19.1964, BUD23]

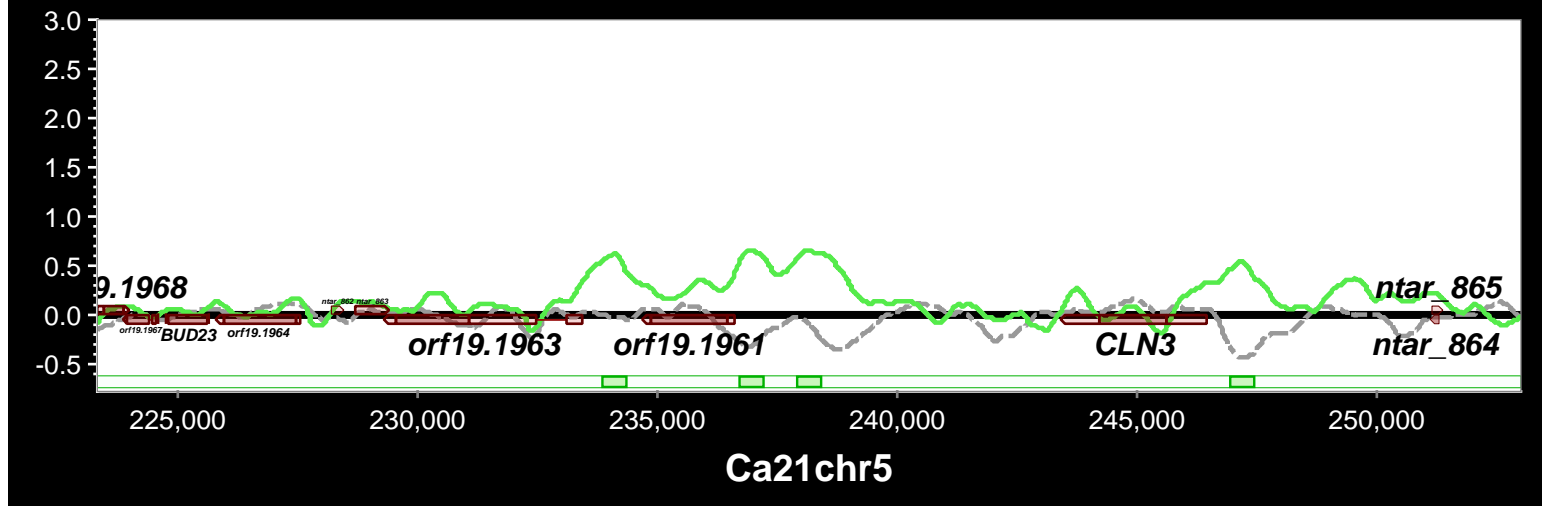

[0.64] Ca21chr3:1208224-1237907 [+] [orf19.6984, orf19.6983, TEA1, tV(AAC)5, tV(AAC)6]

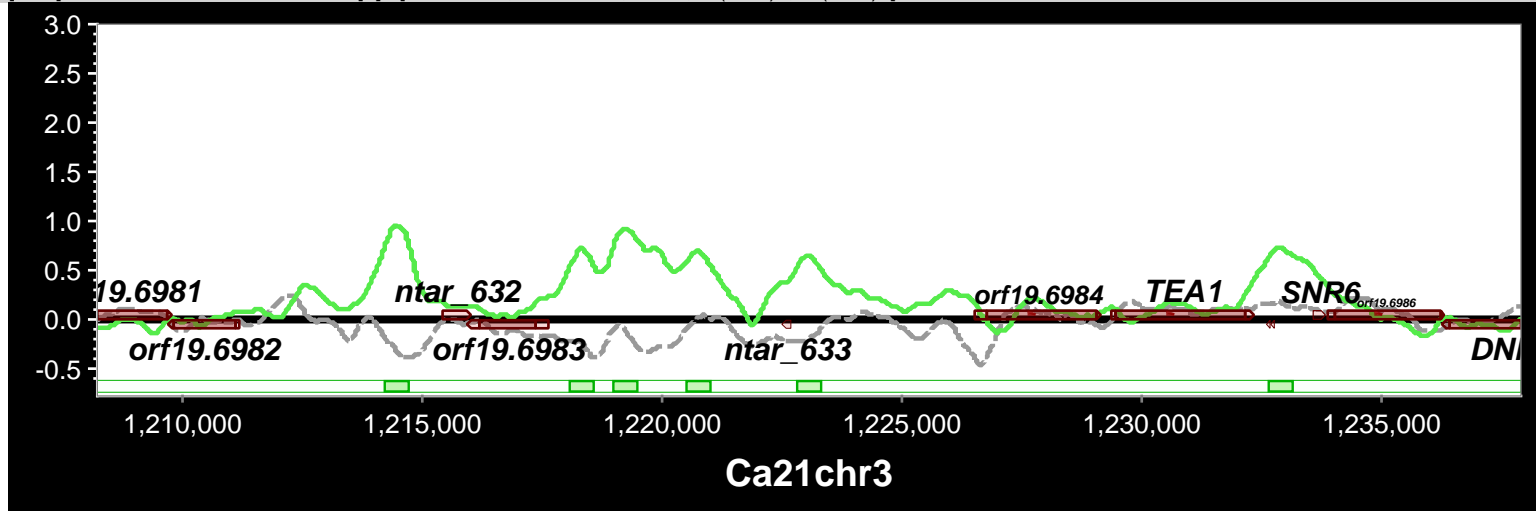

[0.634] Ca21chr2:1348128-1377811 [+] [FRP3, DBF2, orf19.1225, orf19.81, orf19.1296]

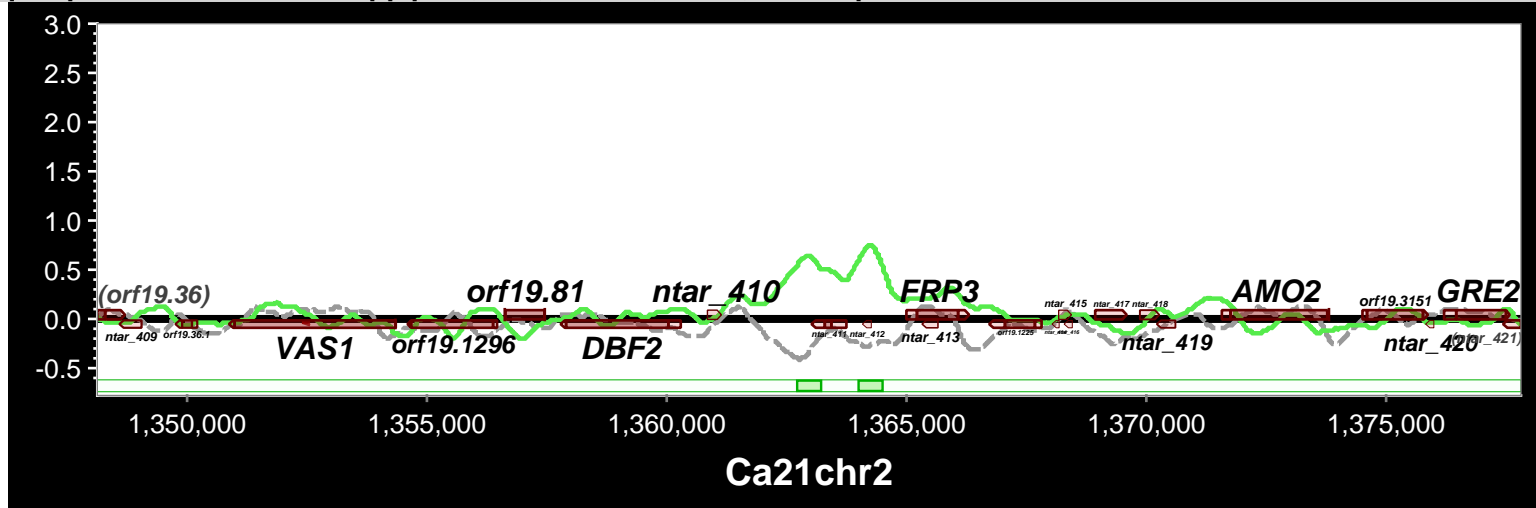

[0.63] Ca21chrR:1144261-1173944 [+] [tR(ACG)1, tR(ACG)2, orf19.5284, PST3, orf19.3512]

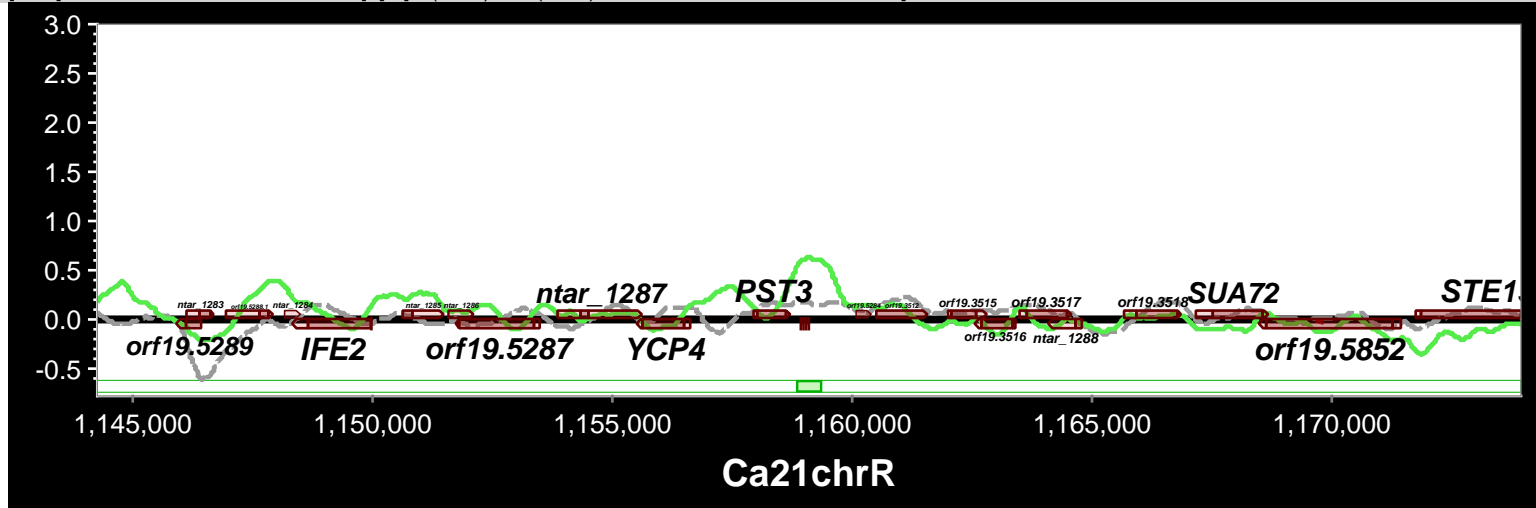

[0.628] Ca21chr3:1459050-1488733 [+] [AAF1, th(GUG)3, GLG2, ECM15, orf19.7437]

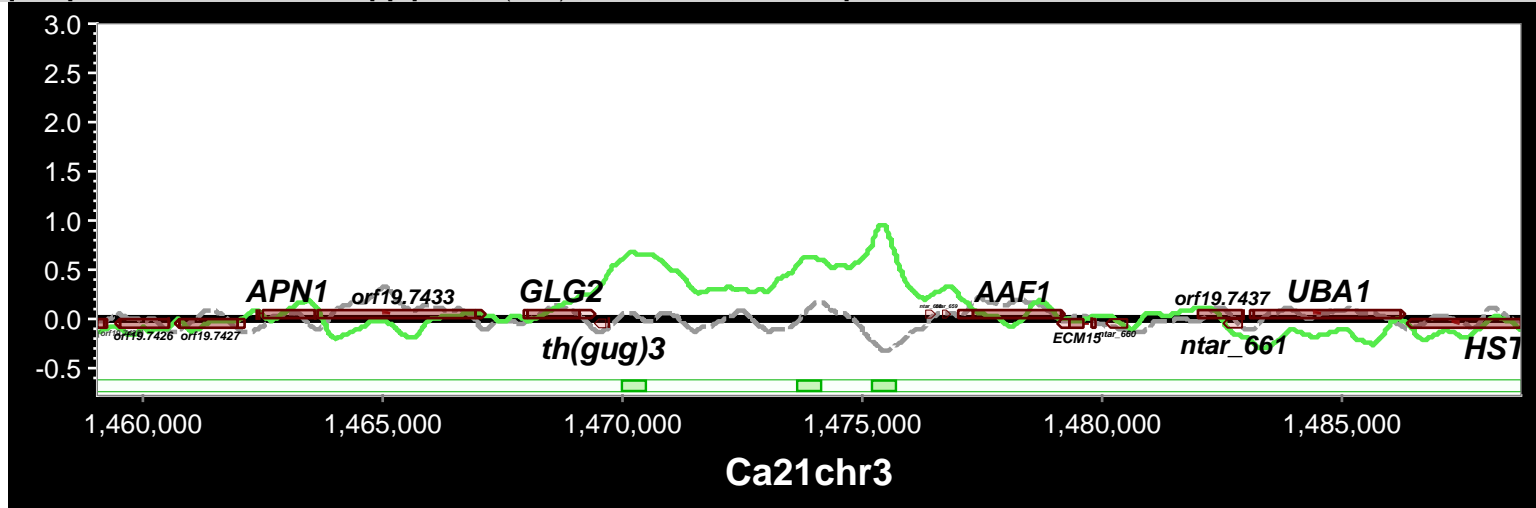

[0.626] Ca21chr4:551731-581414 [+] [orf19.2725, orf19.2724, orf19.2726, GRX3, orf19.2728]

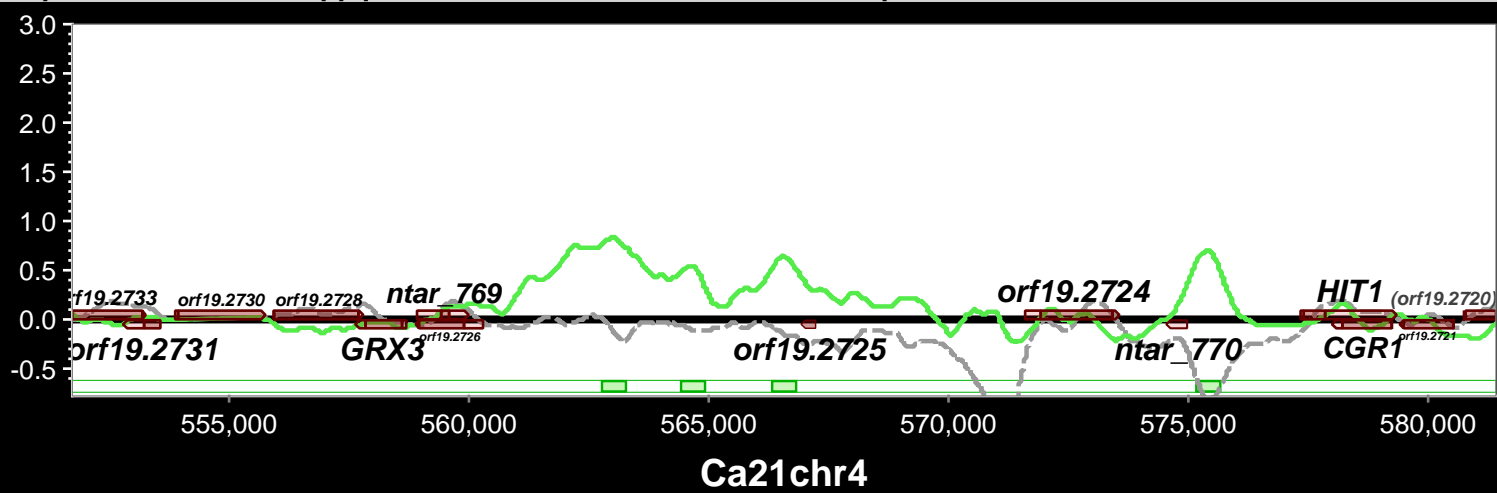

[0.625] Ca21chr1:2574187-2603870 [+] [tY(GUA)4, tY(GUA)1, CAS1, orf19.1136, orf19.5282]

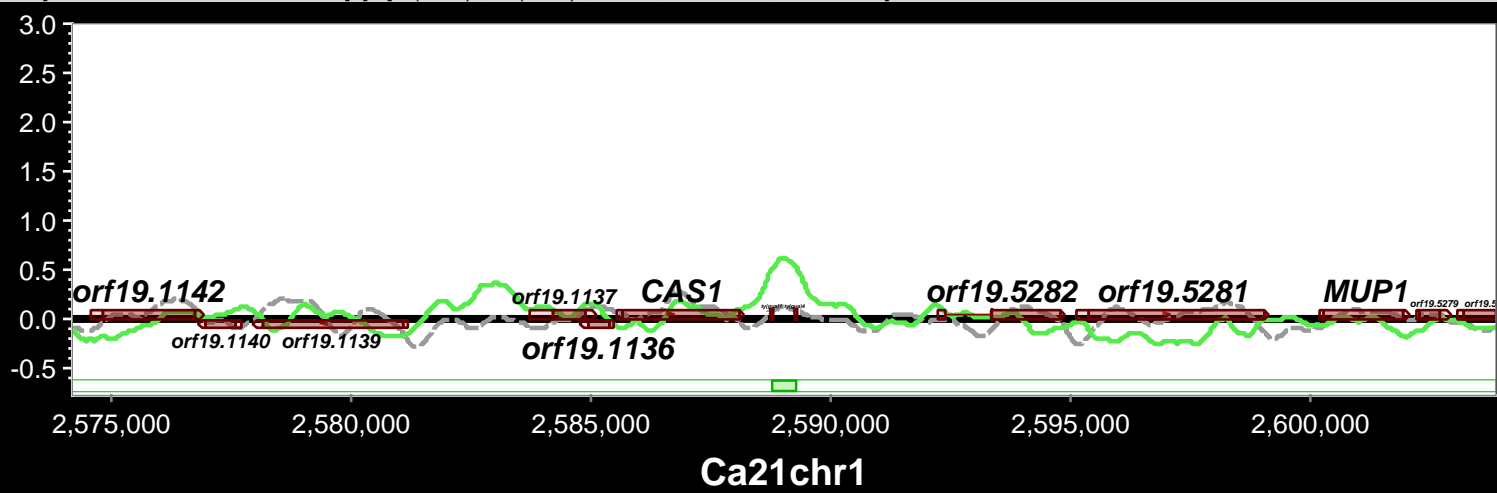

[0.624] Ca21chr2:1128998-1158681 [+] [tS(AGA)4, orf19.6873.1, RPS8A, orf19.6872, orf19.6874]

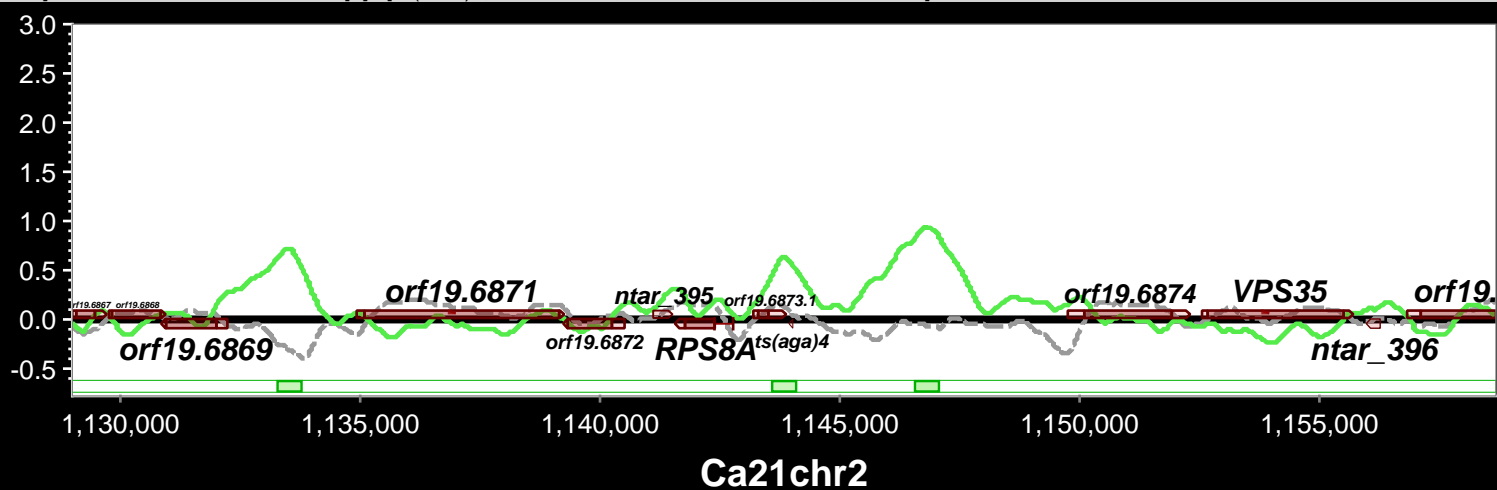

[0.623] Ca21chr4:766305-795988 [+] [tD(GUC)4, tG(GCC)2, tD(GUC)3, tD(GUC)2, SPO75]

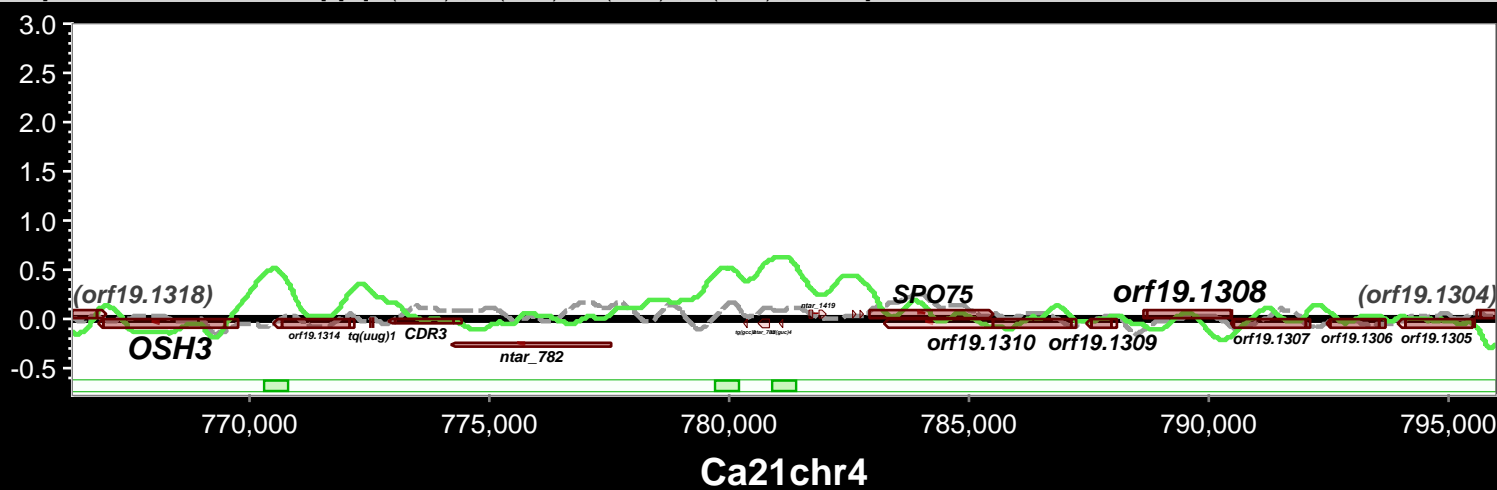

[0.623] Ca21chrR:324175-353858 [+] [tL(UAA)2, orf19.2529.1, orf19.2529, orf19.2530, CSP37]

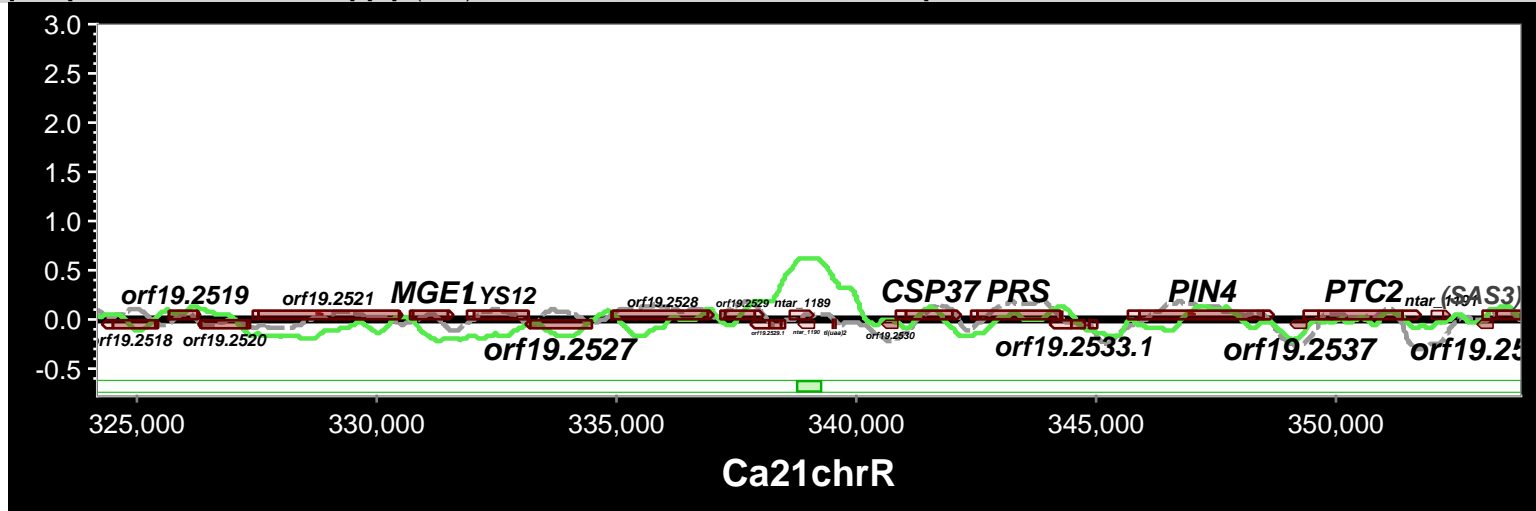

[0.623] Ca21chrR:1675935-1705618 [+] [SAP2, YHB1, orf19.3706, YHB5, PTC6]

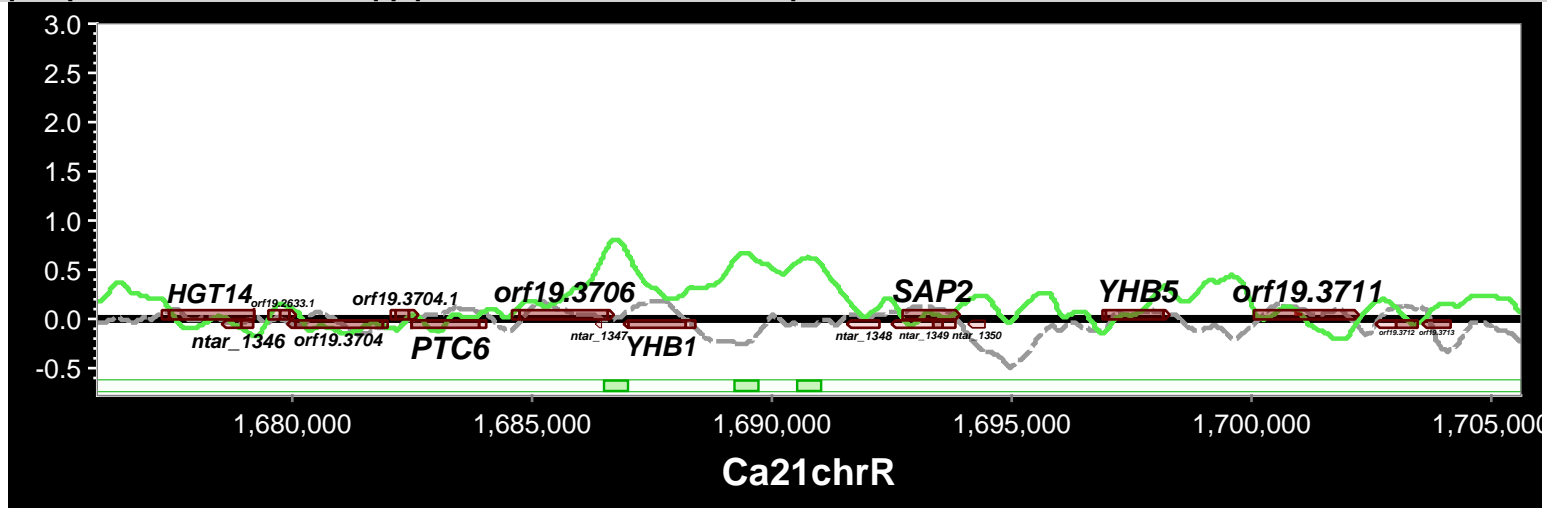

[0.62] Ca21chr1:2085822-2115505 [+] [orf19.4818, orf19.4819, RAM2, orf19.4816, orf19.4820]

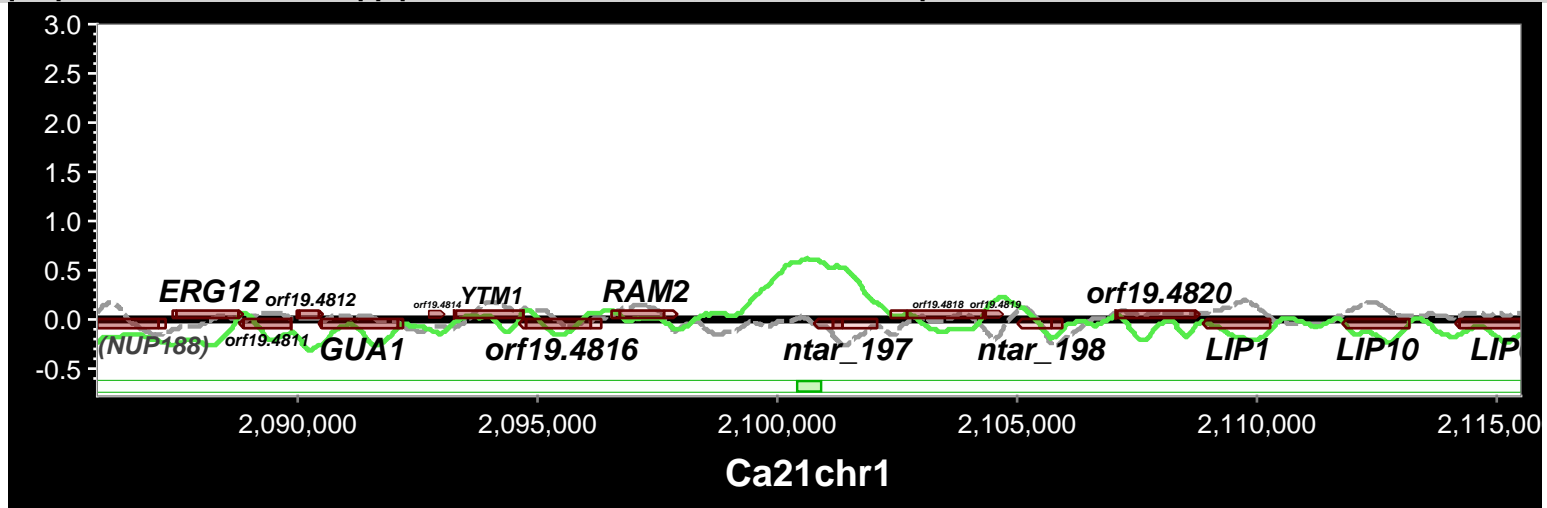

[0.618] Ca21chrR:1219754-1249437 [+] [ts(AGA)3, orf19.6626, orf19.6627, tv(AAC)4, orf19.6625]

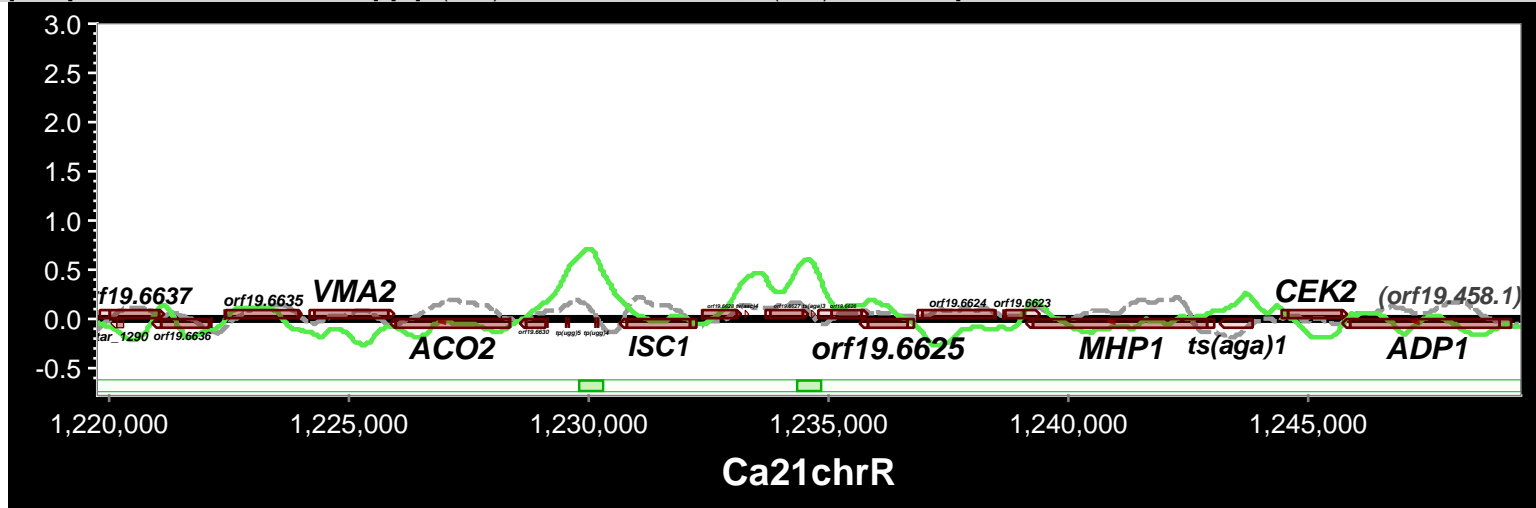





[0.606] Ca21chr5:219262-248945 [+] [orf19.1961, orf19.1963, orf19.1964, BUD23, orf19.1967]

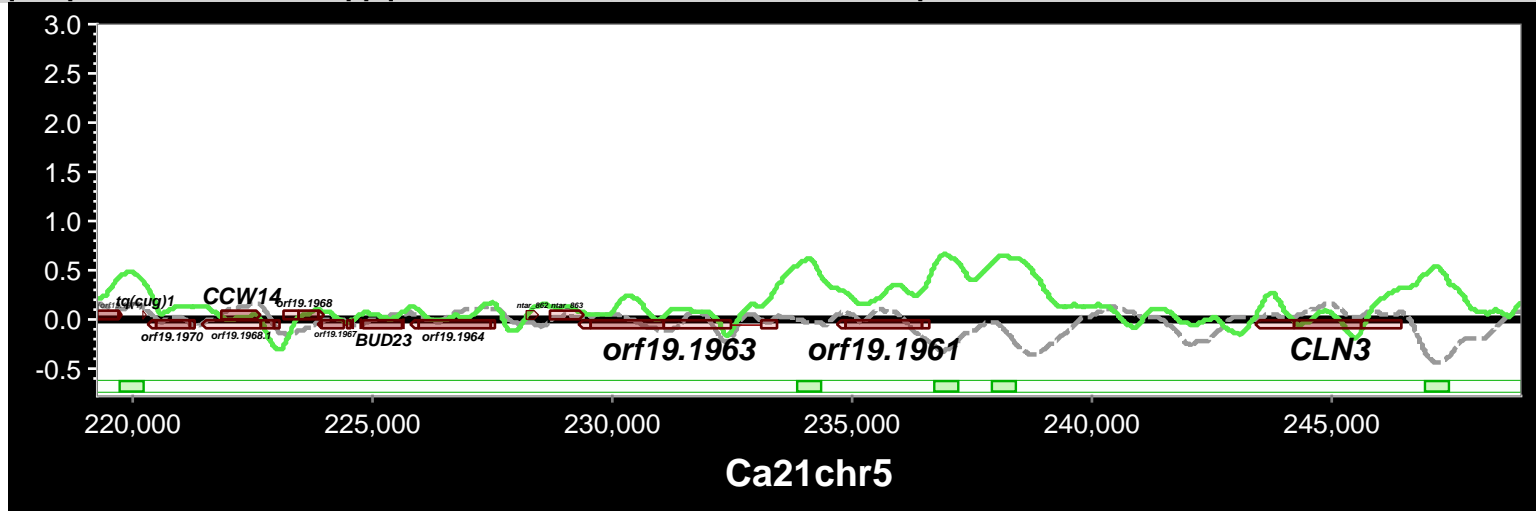

[0.604] Ca21chr1:70140-99823 [+] [orf19.6055, orf19.6054, CIS2, orf19.6056, orf19.6057]

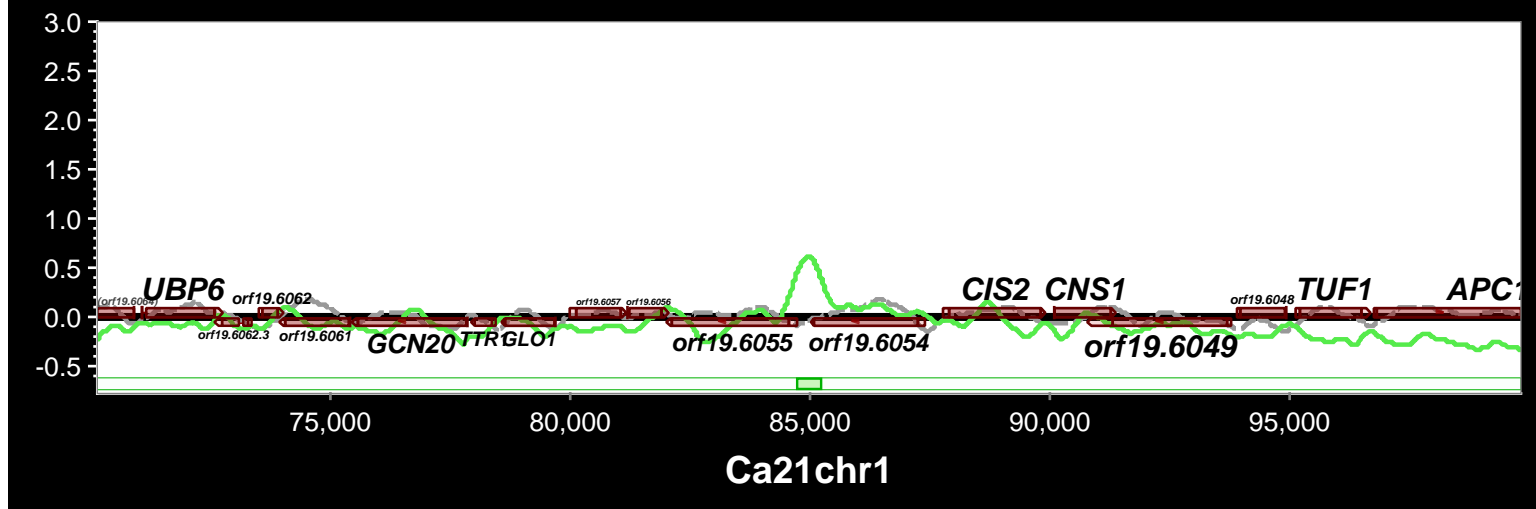

[0.604] Ca21chr4:848886-878569 [+] [JEN2, orf19.5308, RHD3, orf19.5311, orf19.5304]

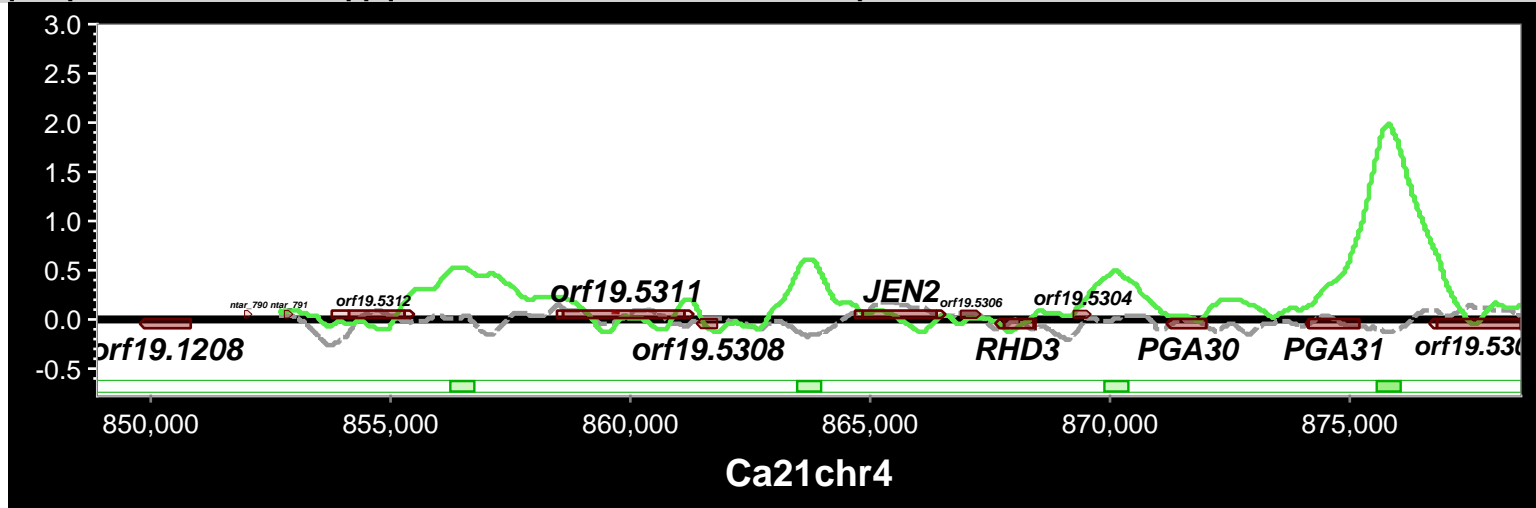

[0.603] Ca21chr4:1087921-1117604 [+] [orf19.741, HAP41, ALD6, MYO5, GDB1]

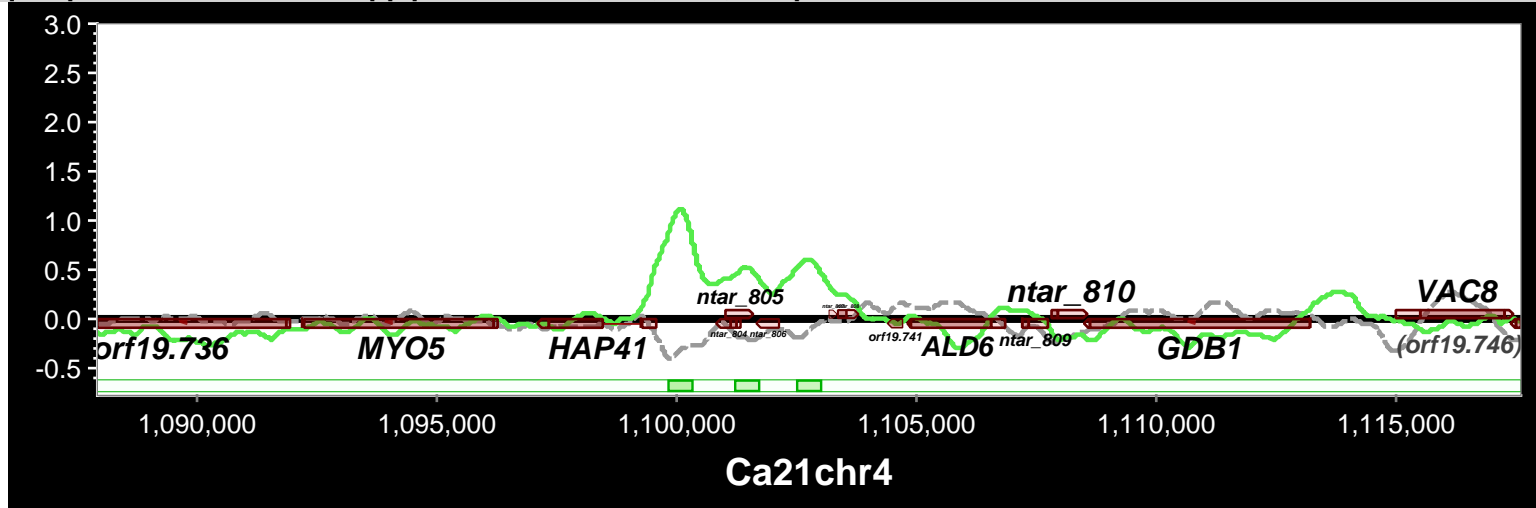

[0.602] Ca21chr7:25941-55624 [+] [HGT12, orf19.7095, orf19.7096, HGT13, orf19.7092]

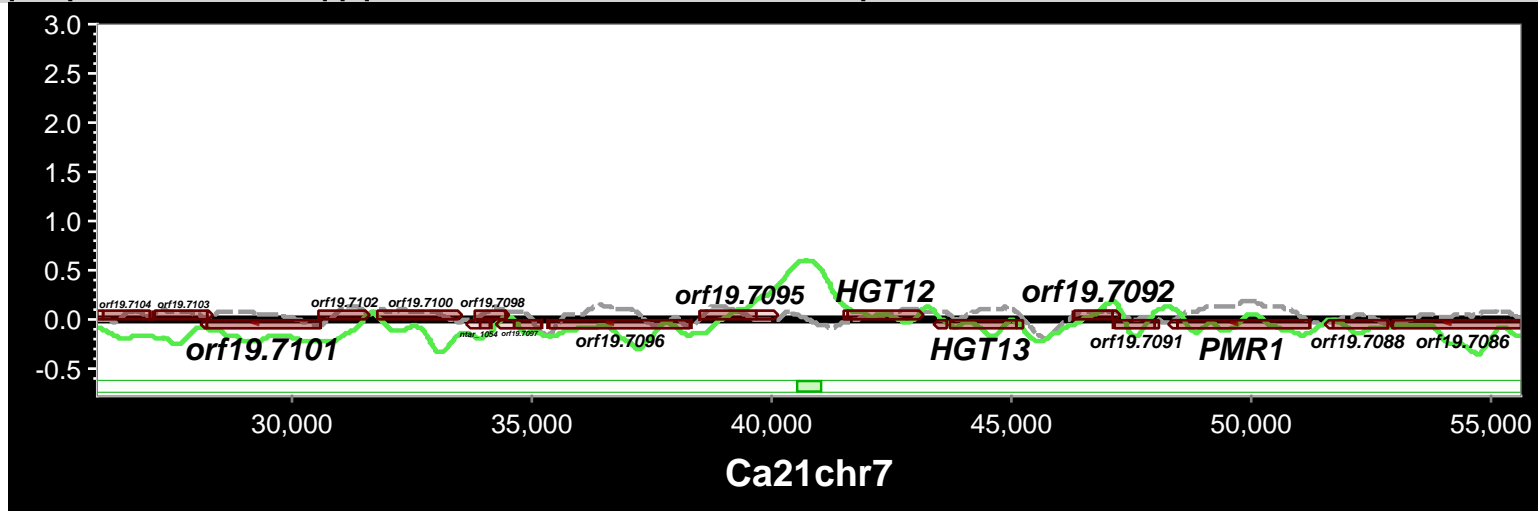

[0.6] Ca21chrR:1606897-1636580 [+] [orf19.6118, orf19.6117, orf19.6119, GLK4, MNL1]

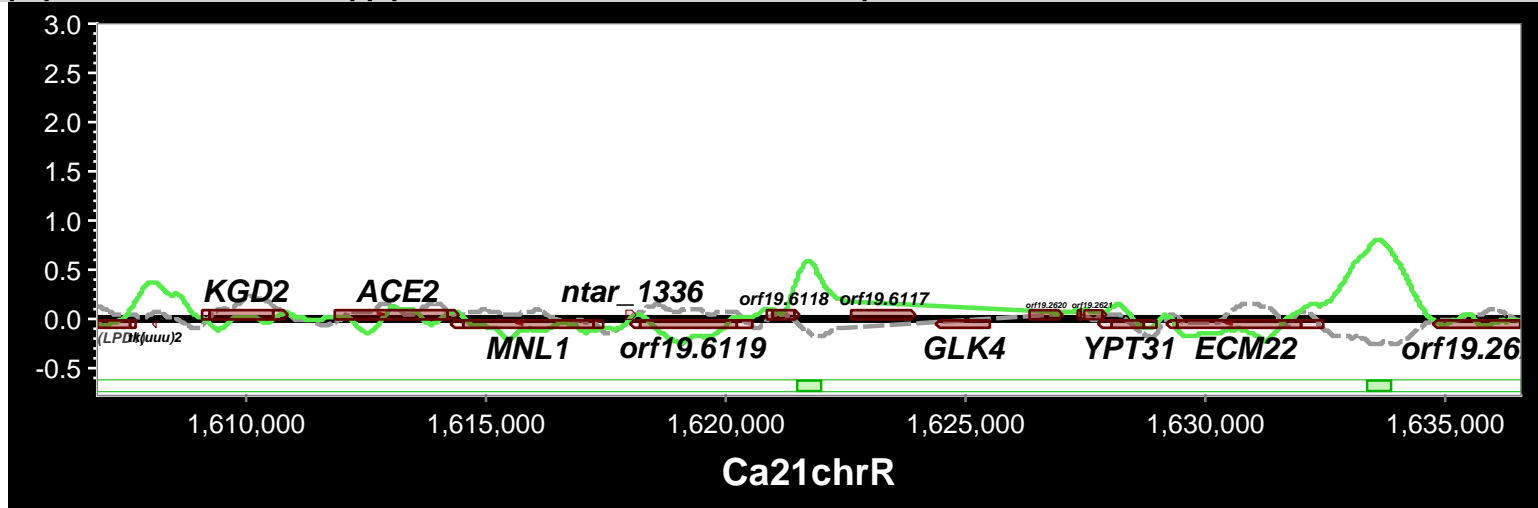

[0.598] Ca21chr4:1027309-1056992 [+] [AGP3, CSR1, orf19.3796, orf19.3797, orf19.3793]

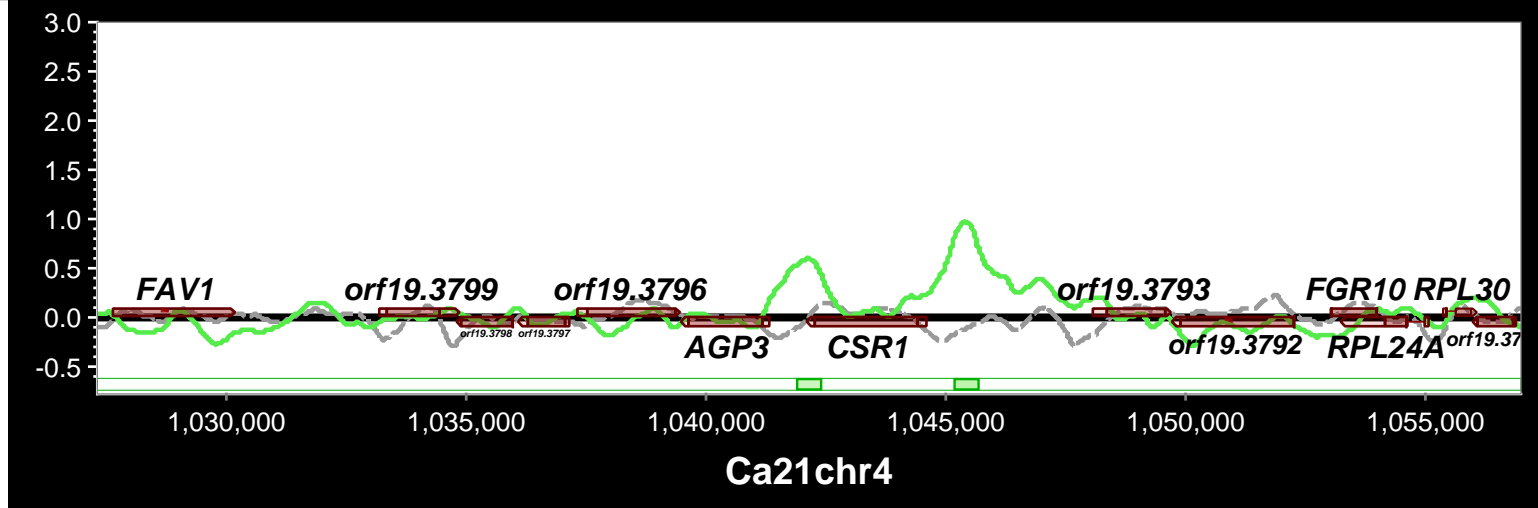

[0.596] Ca21chr7:478645-508328 [+] [LDG3, orf19.6487, orf19.6484, orf19.6482, orf19.6488]

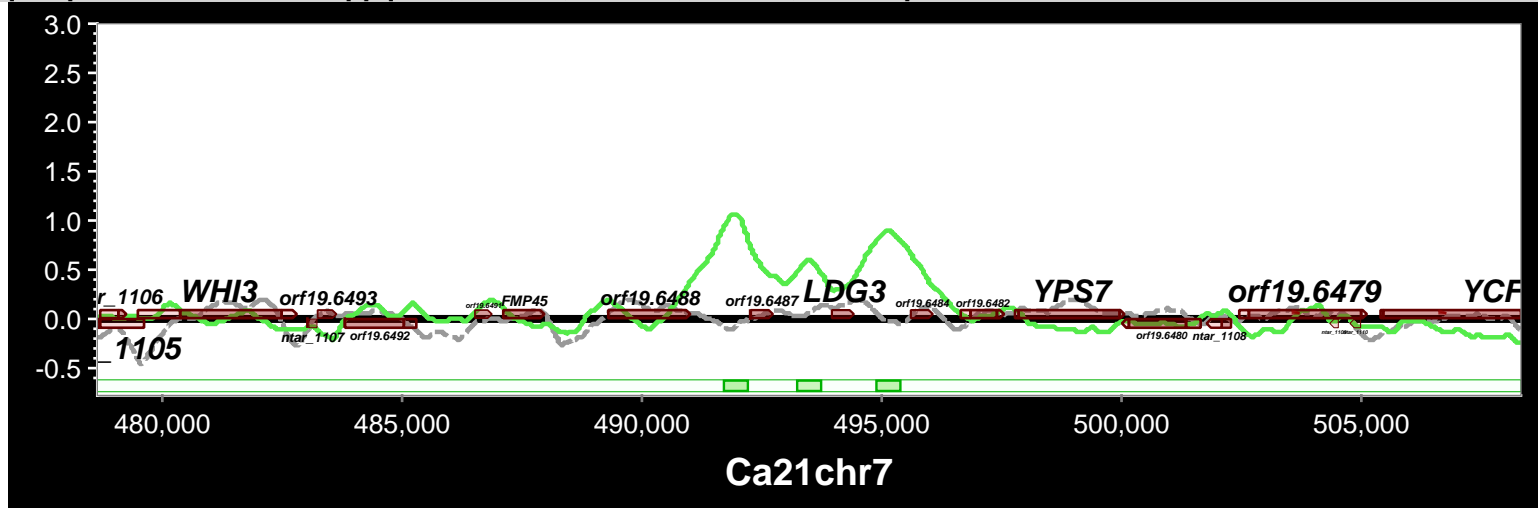

[0.594] Ca21chr2:305587-335270 [+] [orf19.1488, tL(CAA)1, orf19.1486, MSB2, orf19.1485]

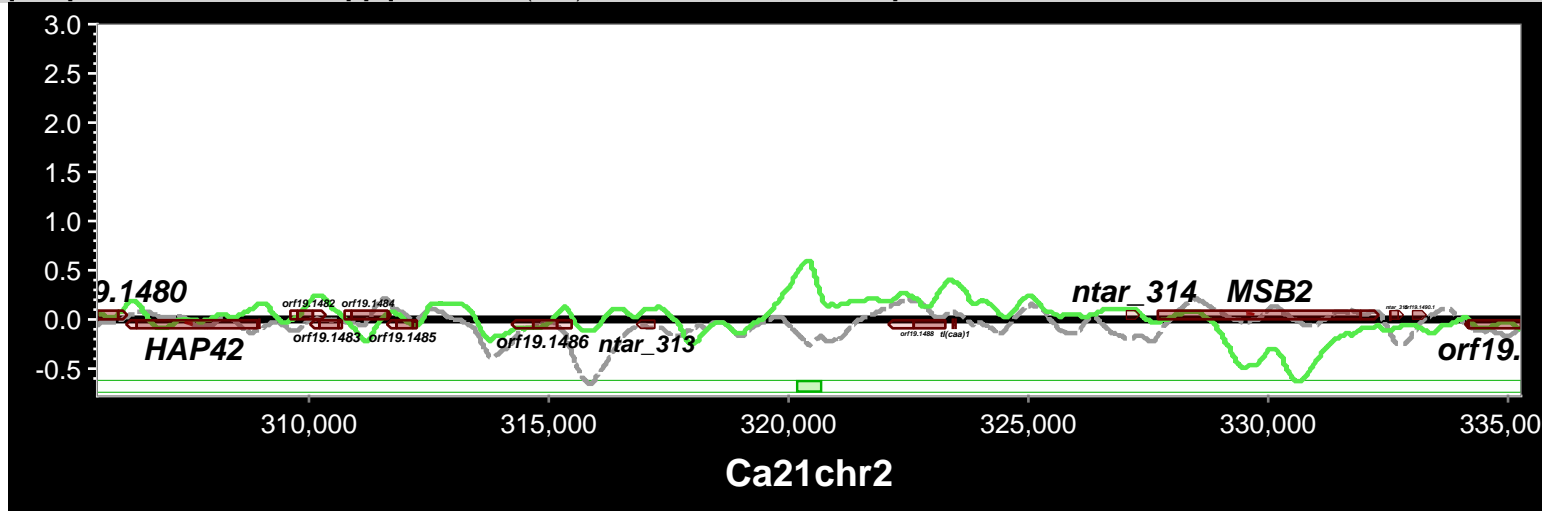

[0.593] Ca21chr6:890894-920577 [+] [ALS4, orf19.4553, orf19.77.1, orf19.4557, SPB1]

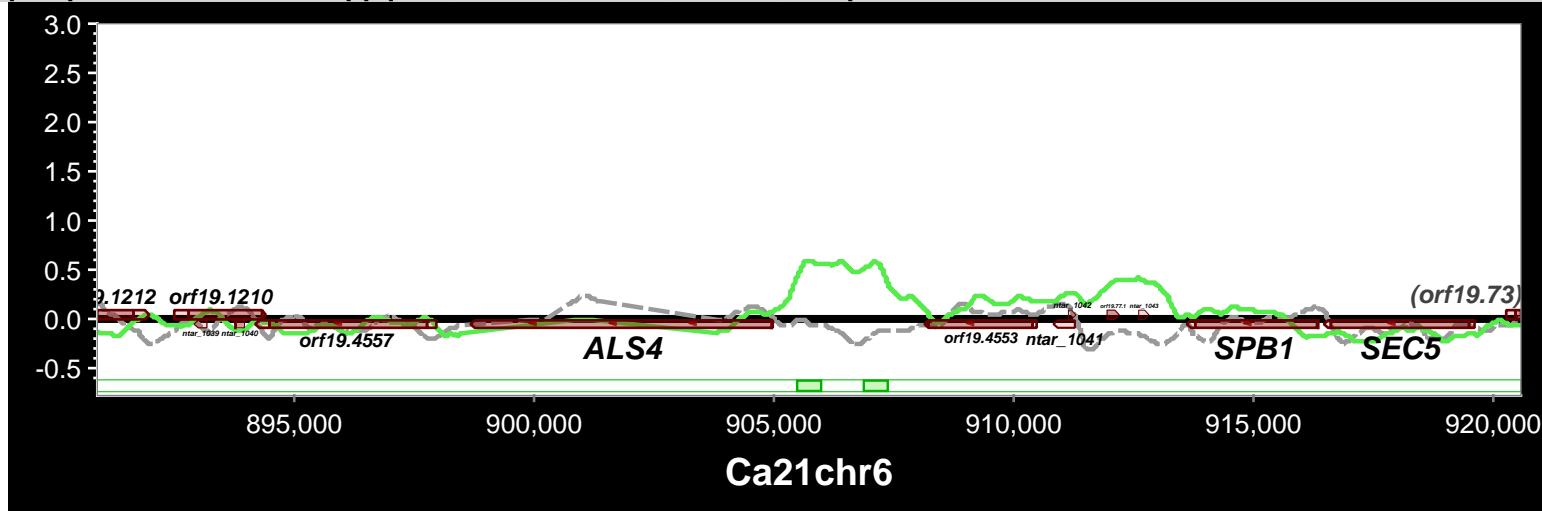

[0.589] Ca21chr5:480538-510221 [+] [orf19.4230, PTH2, orf19.4229, orf19.4228, orf19.4227]

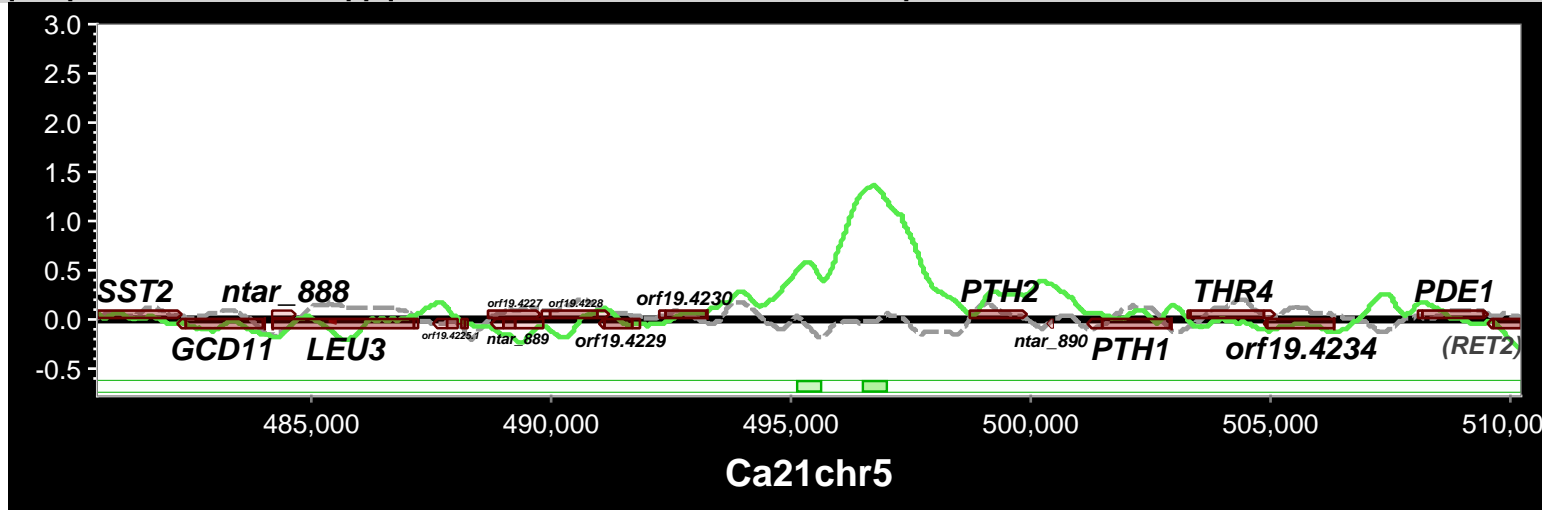

[0.587] Ca21chr3:838955-868638 [+] [CDR11, orf19.913.2, SBP1, orf19.5854.1, HEM13]

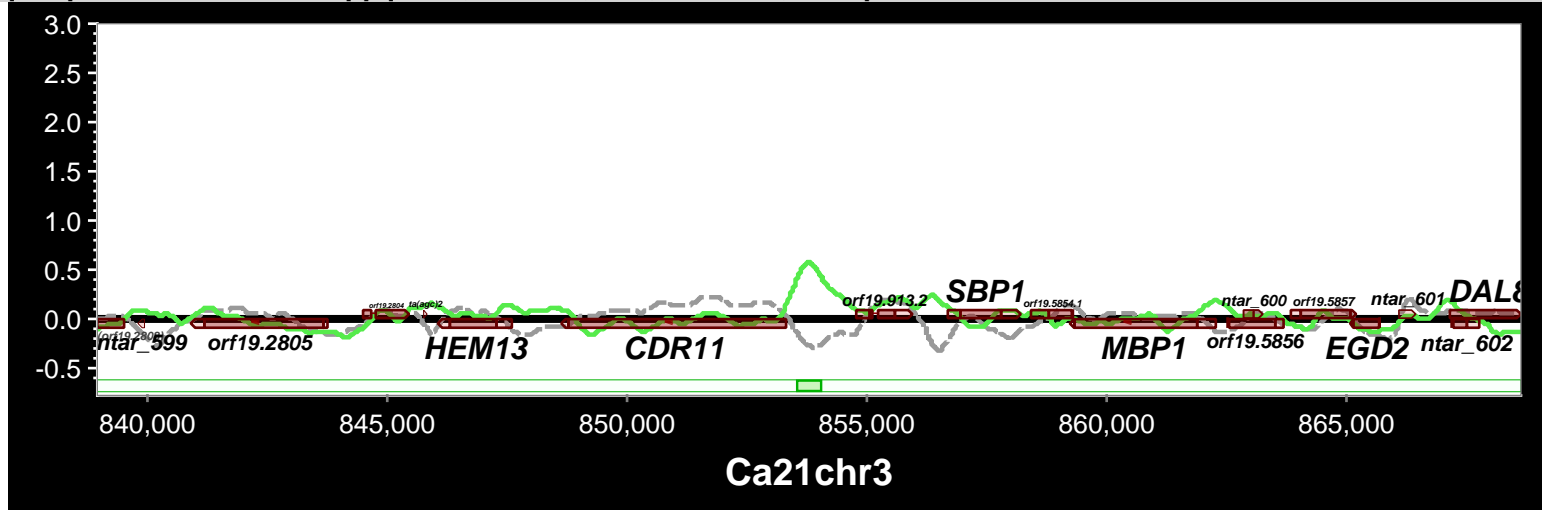

[0.586] Ca21chr1:190065-219748 [+] [tA(AGC)4, HMT1, orf19.3290, orf19.3289, orf19.3292]

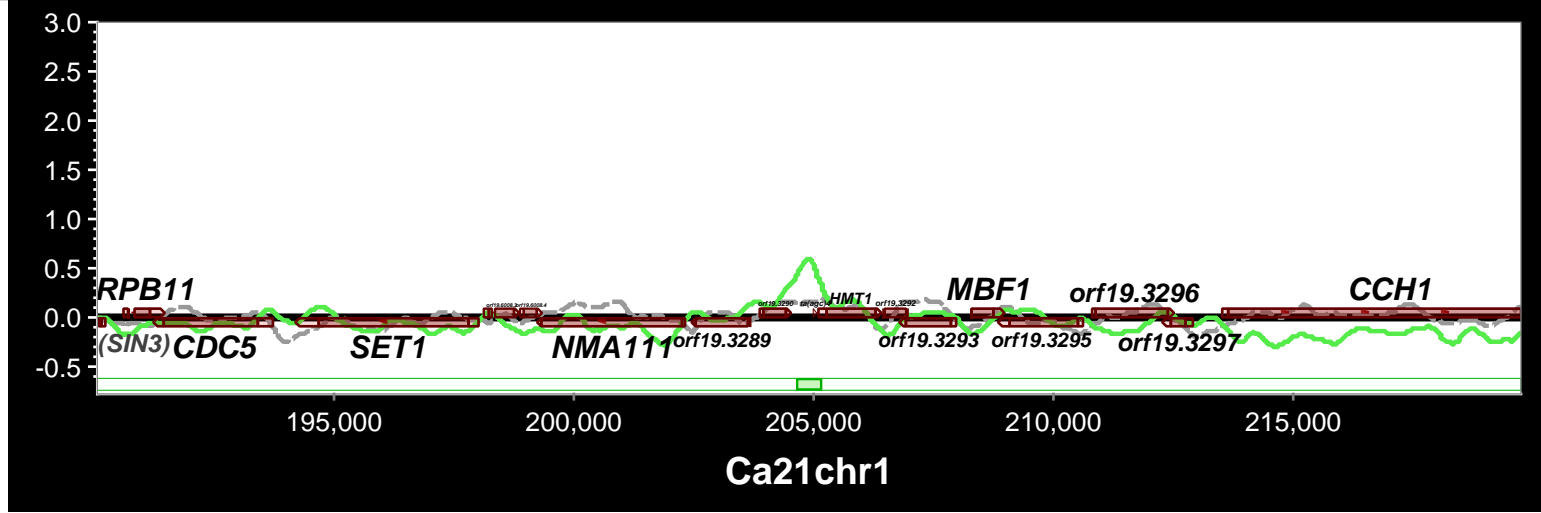

[0.585] Ca21chrR:967725-997408 [+] [RBR1, orf19.533, RBR2, orf19.536, orf19.530]

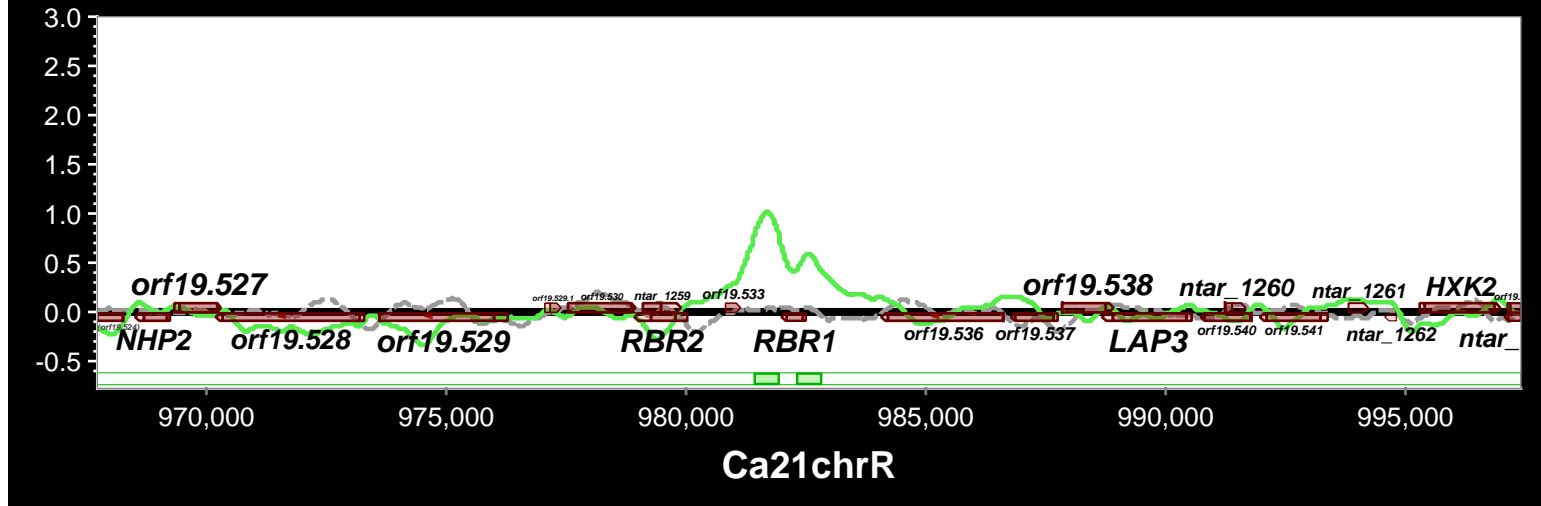

[0.584] Ca21chr6:132182-161865 [+] [orf19.3644, orf19.3643, CTR1, orf19.3647, orf19.3648]

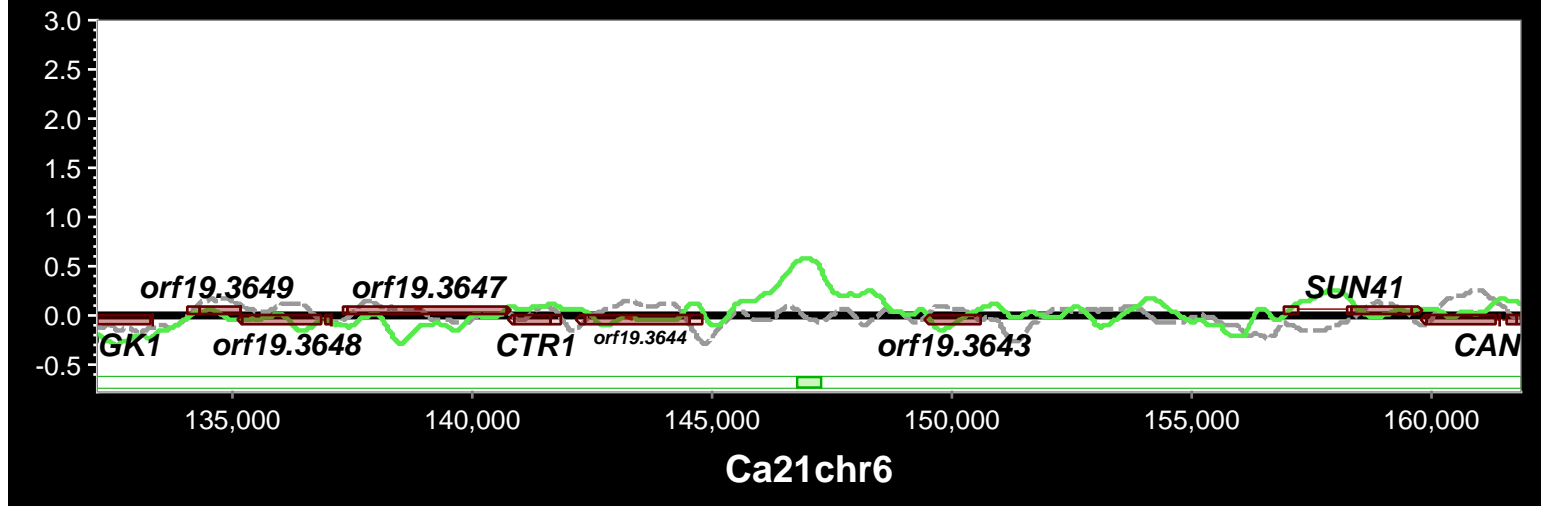

[0.584] Ca21chr6:781629-811312 [+] [ALS9, ALS1, ALA1, orf19.5747, orf19.5748]

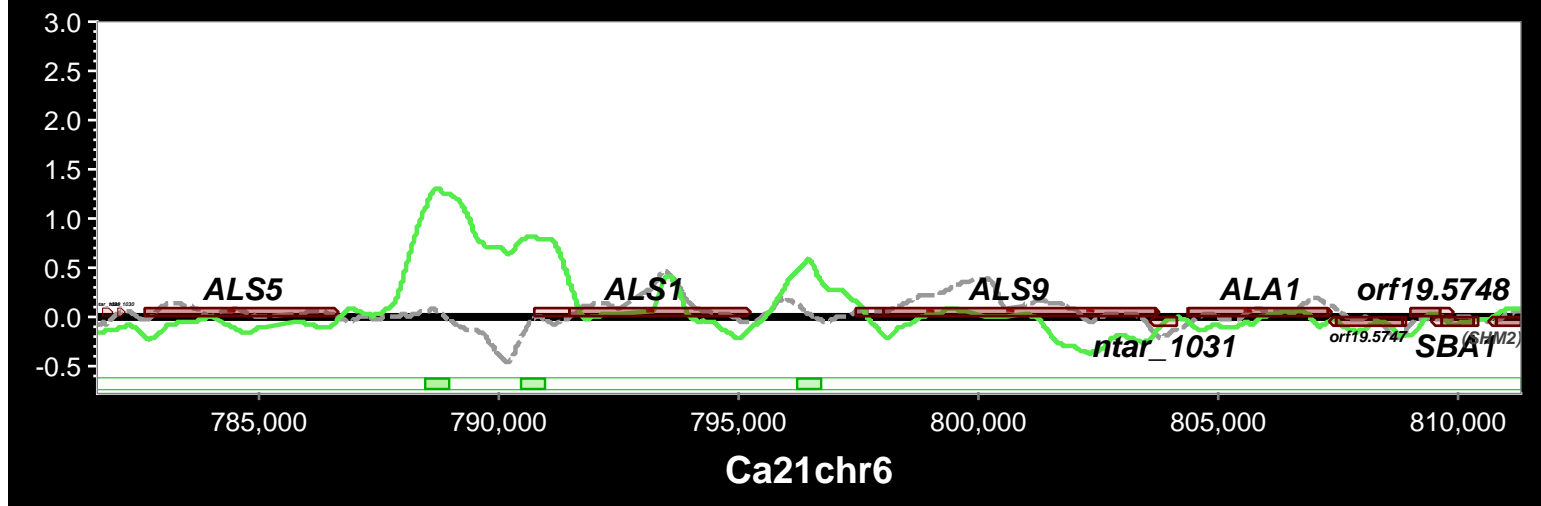

[0.584] Ca21chrR:1823392-1853075 [+] [PGA13, orf19.6418, orf19.6419.1, tL(CAA)4, TSR1]

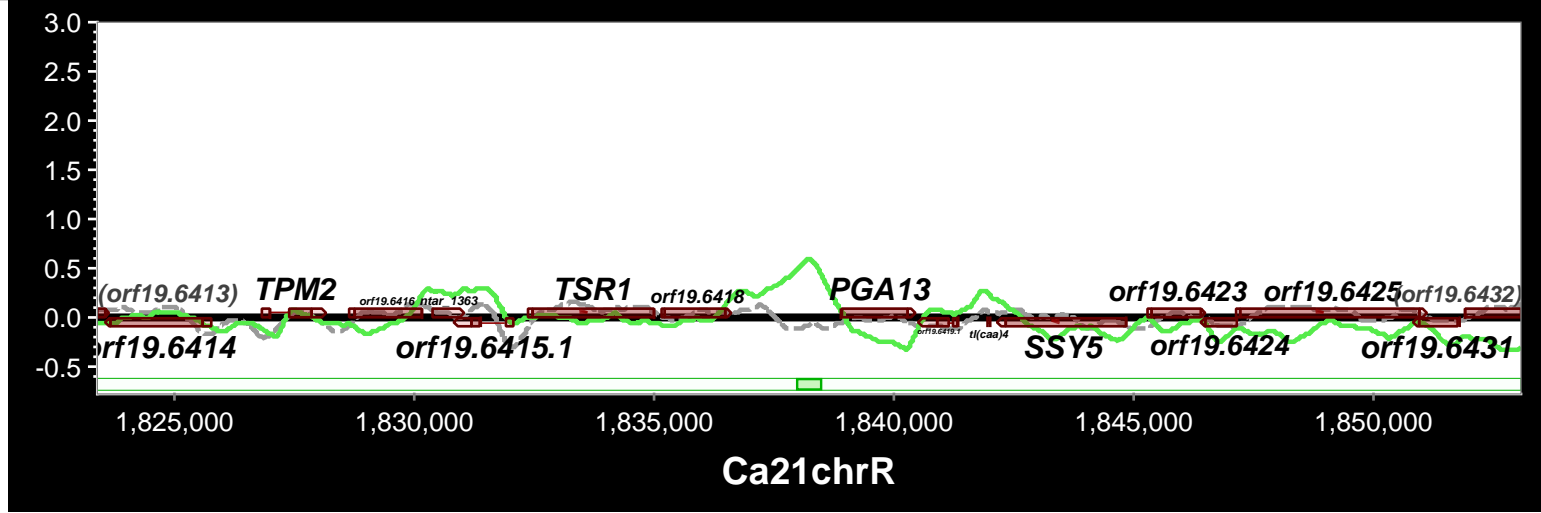

[0.583] Ca21chr1:2426465-2456148 [+] [orf19.2308, orf19.2309, orf19.2307, RPL2, orf19.2306]

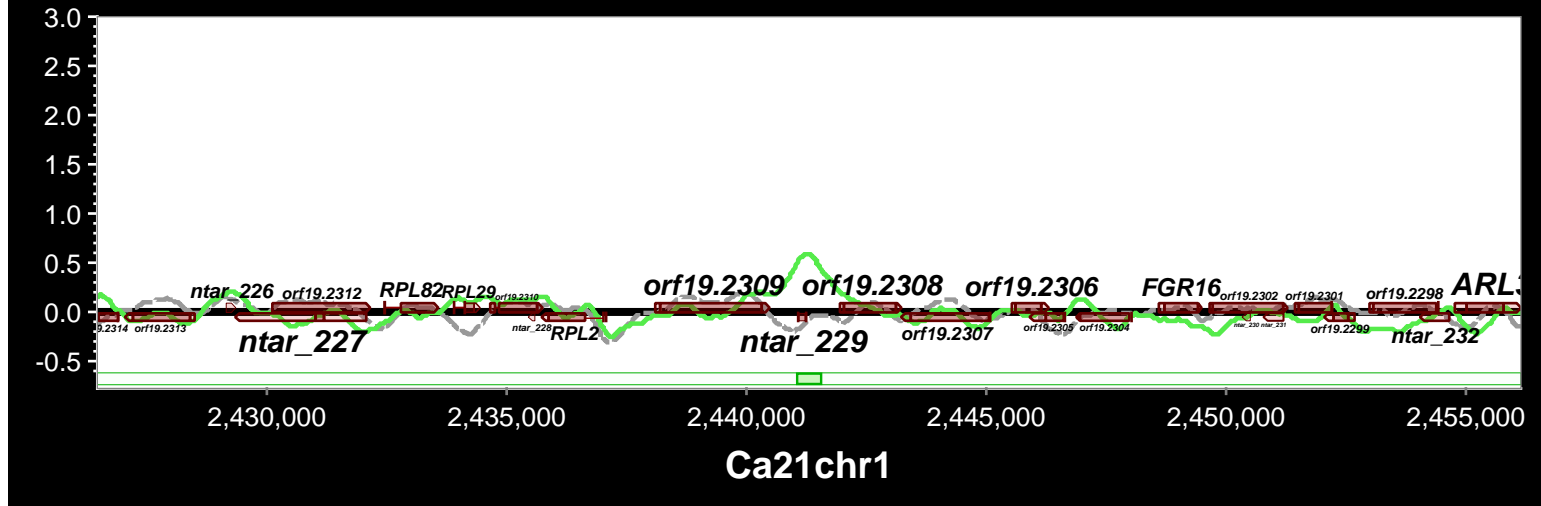

[0.583] Ca21chr2:1864176-1893859 [+] [MIT1, MET10, orf19.4078, SLP2, orf19.4080]

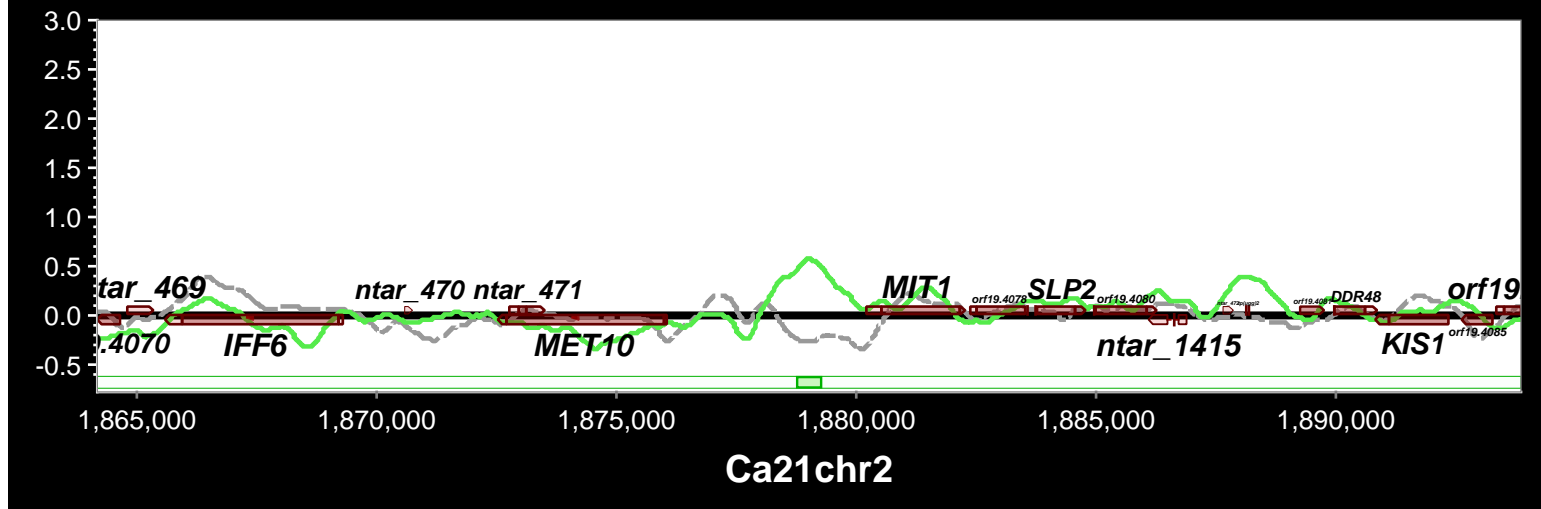

[0.582] Ca21chr1:2607898-2637581 [+] [orf19.5267, orf19.5268, orf19.5269, orf19.5266, orf19.5269.1]

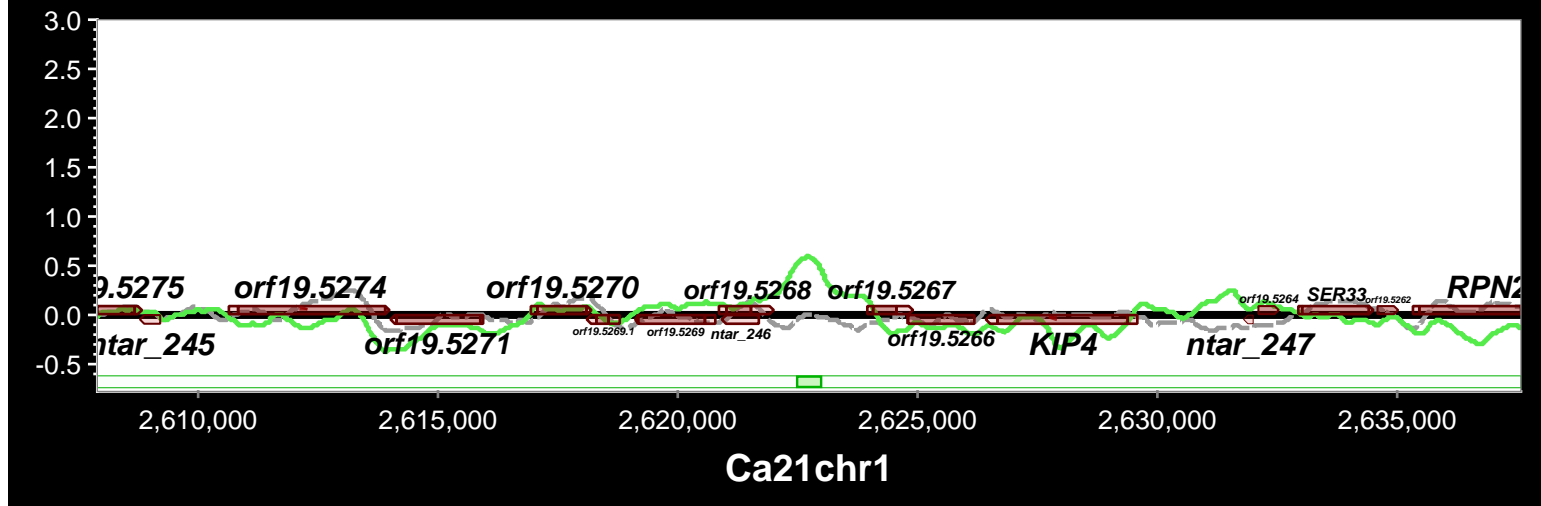

[0.581] Ca21chr6:892283-921966 [+] [ALS4, orf19.4553, orf19.77.1, SPB1, orf19.4557]

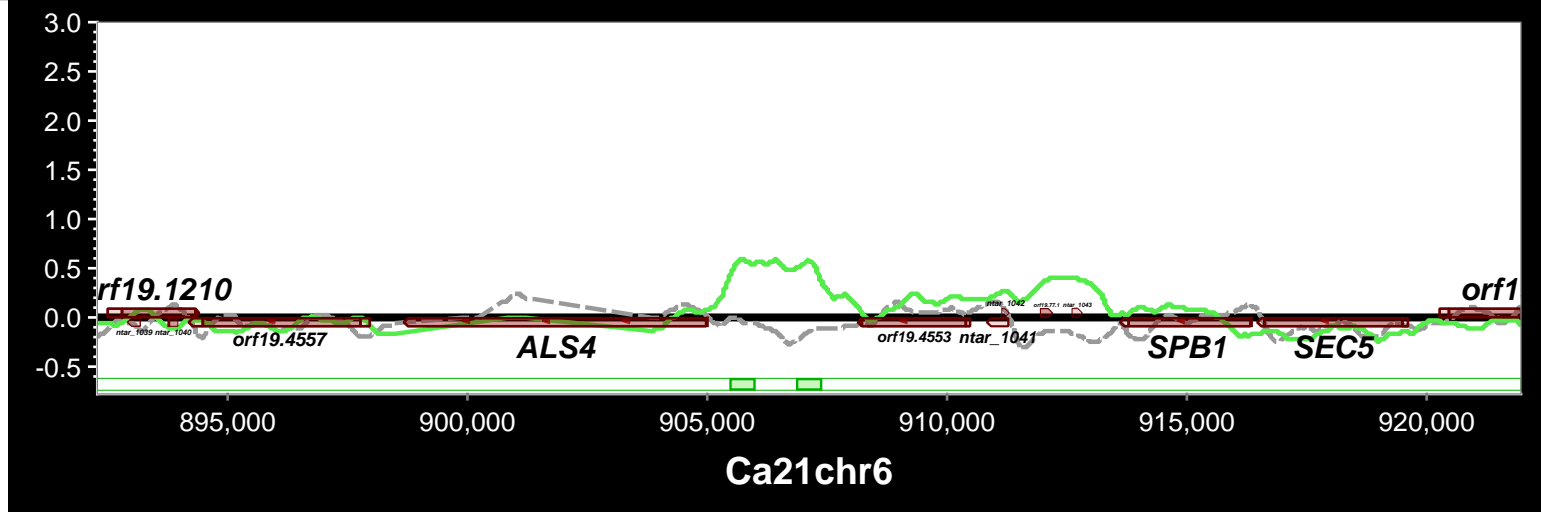

[0.577] Ca21chr1:1335050-1364733 [+] [orf19.6276, orf19.6275, orf19.6277, PBR1, orf19.6280]

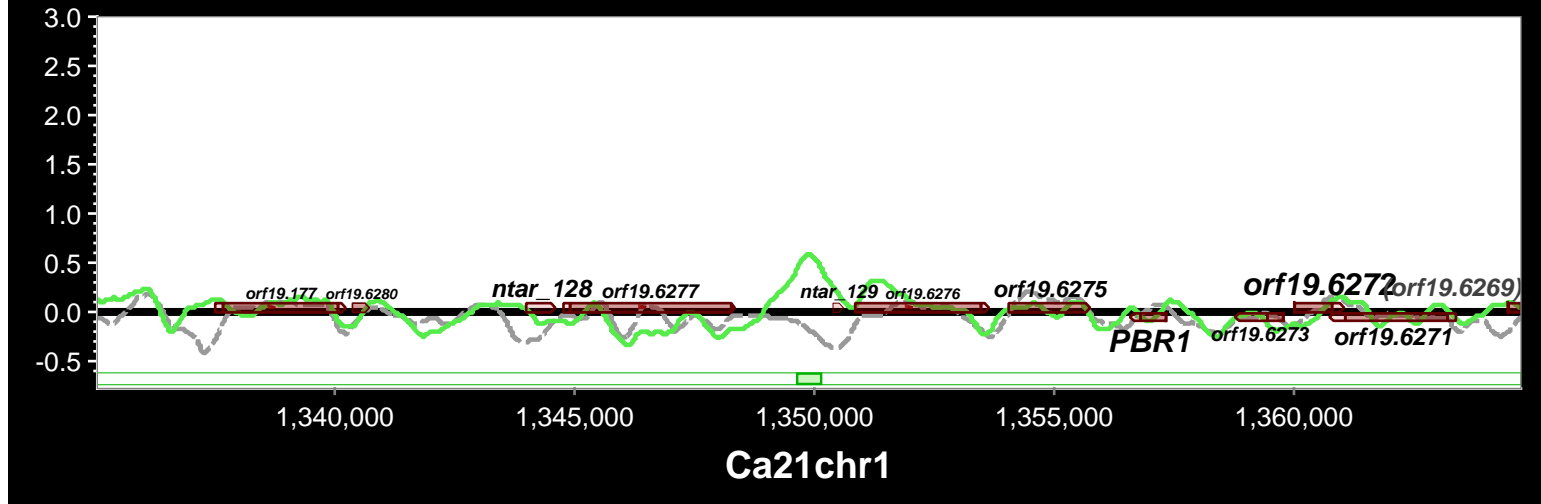

[0.576] Ca21chr3:1-29684 [+] [RPS24, TLO7, orf19.5465, orf19.5464, orf19.5463]

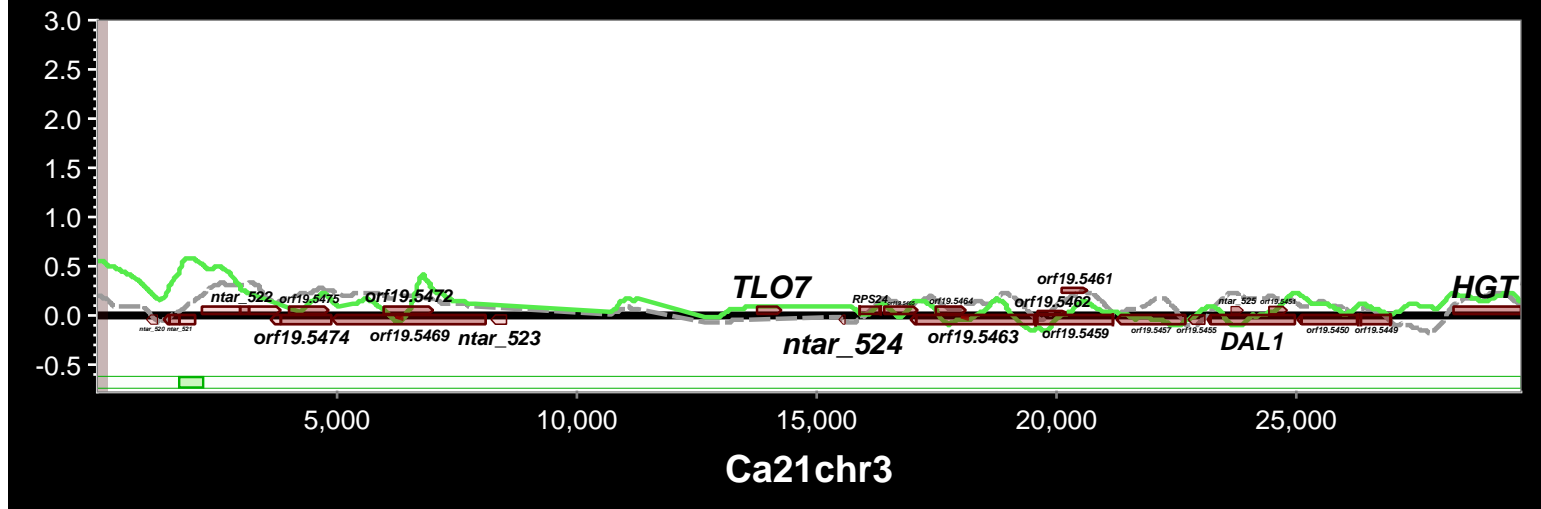

[0.573] Ca21chr6:911458-941141 [+] [orf19.1075.1, orf19.1075, ATM1, orf19.73, HBR2]

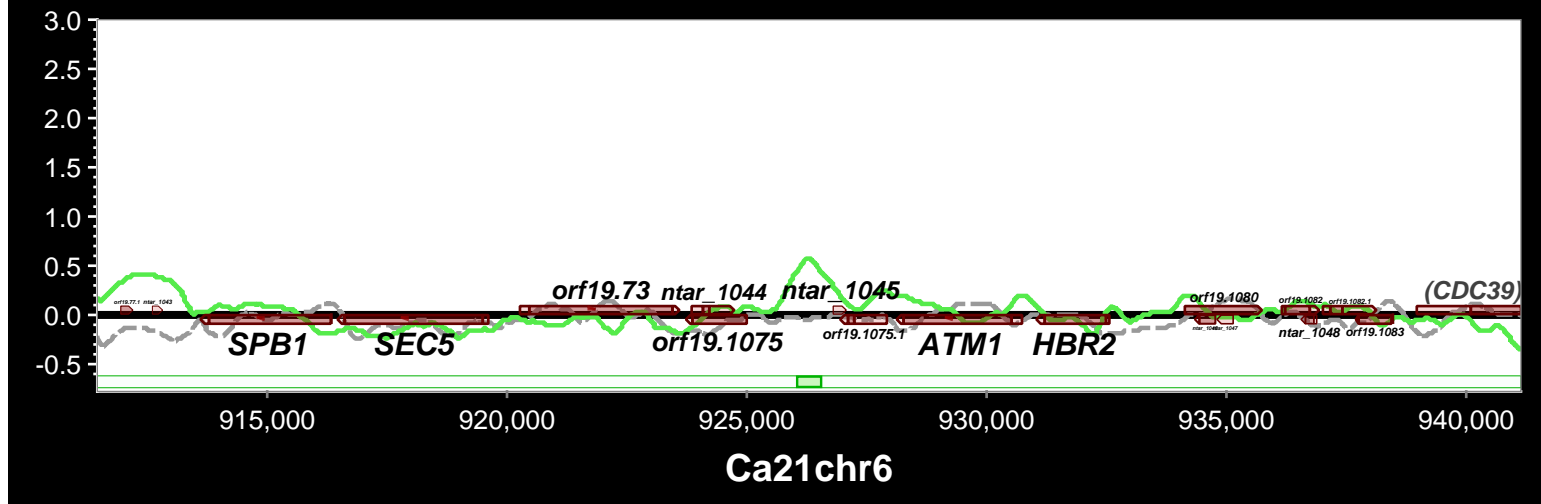

[0.571] Ca21chr1:499857-529540 [+] [orf19.2930, GSC1, orf19.2933, orf19.2934, RPL10]

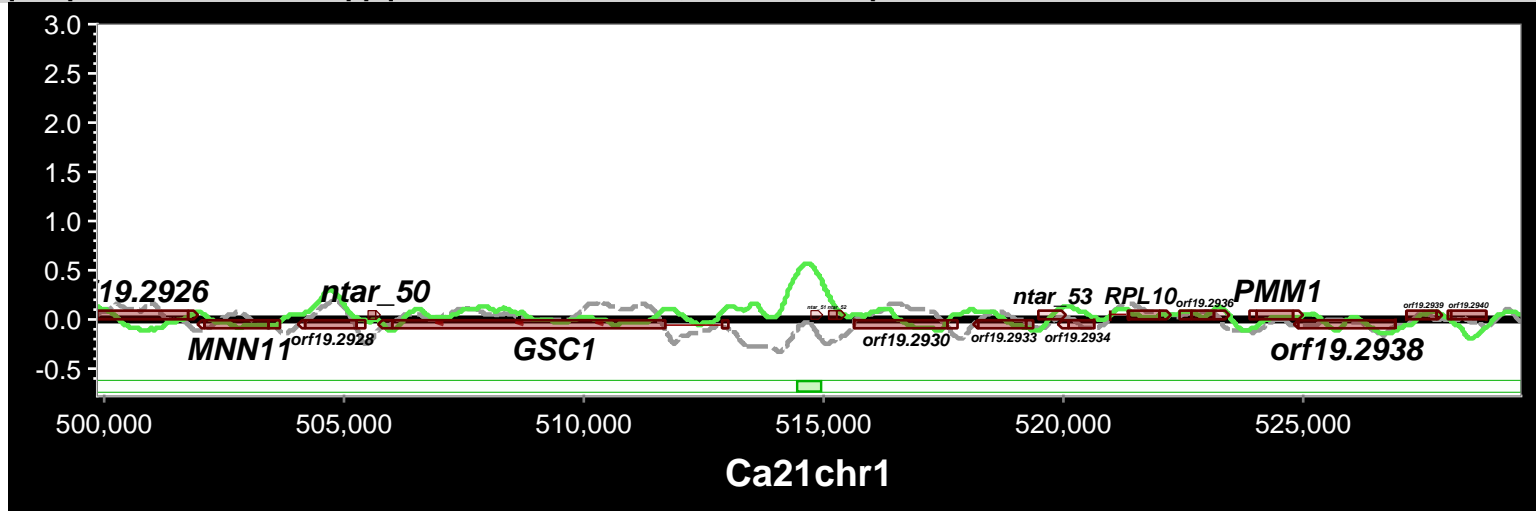

[0.571] Ca21chr3:693562-723245 [+] [orf19.334, FCY2, tE(UUC)1, orf19.332.1, orf19.335]

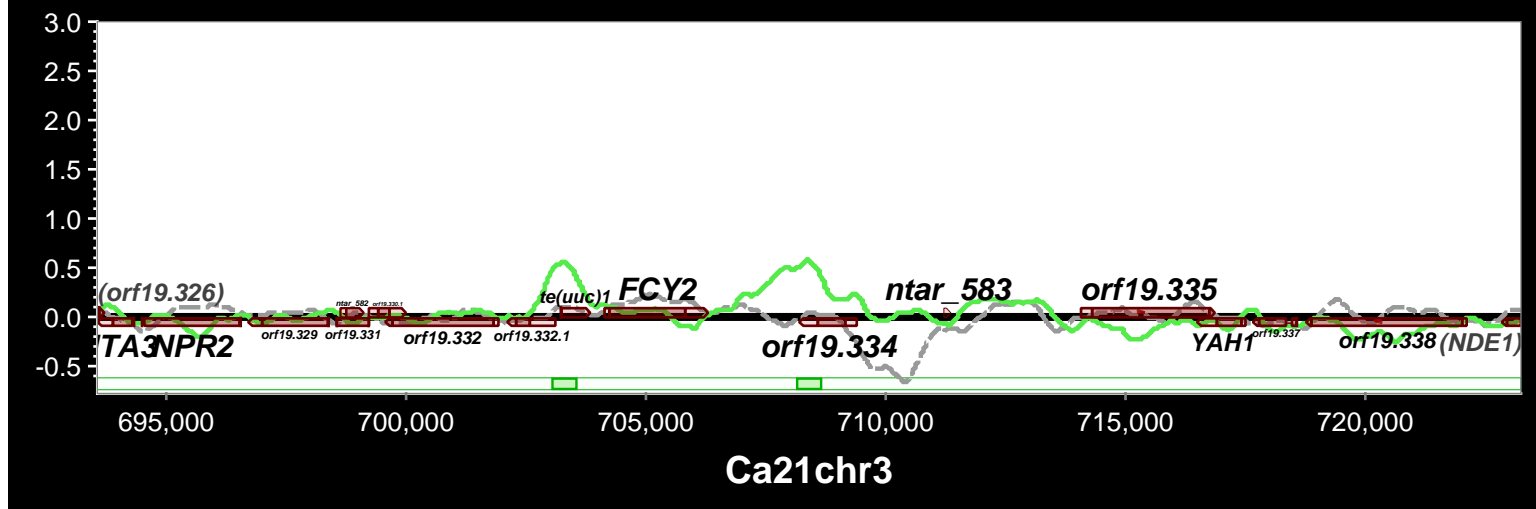

[0.571] Ca21chr4:1489866-1519549 [+] [orf19.3134, orf19.3135, GUT2, orf19.3136, orf19.3132]

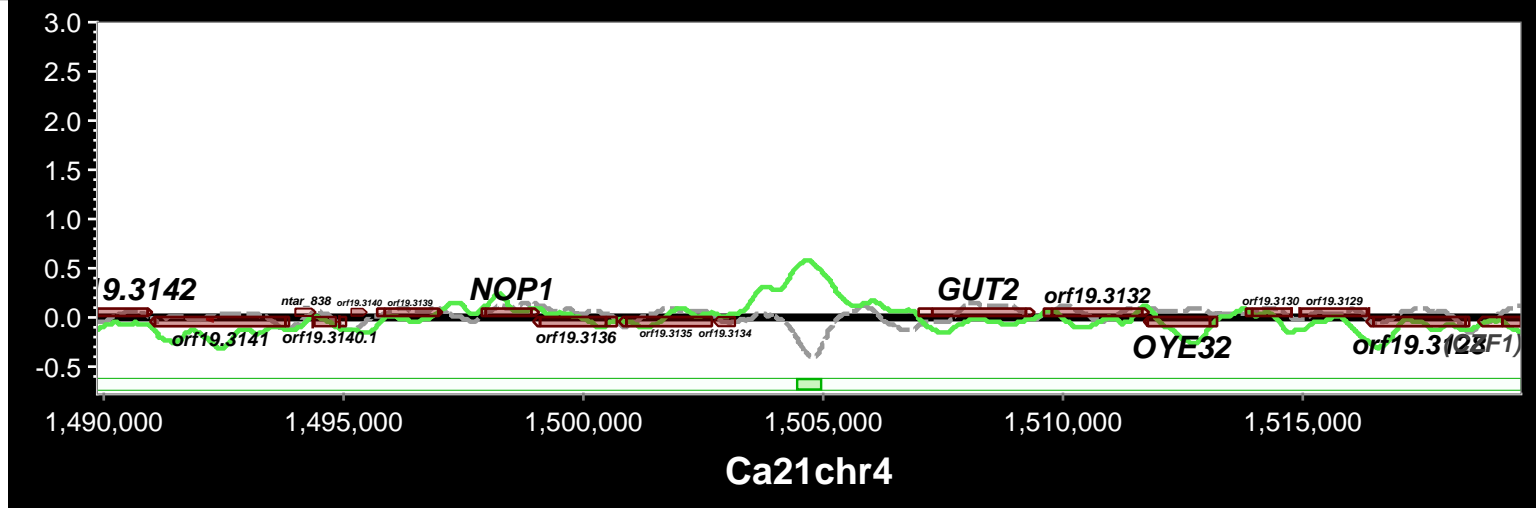

[0.569] Ca21chrR:583084-612767 [+] [RFG1, orf19.2822, orf19.2825, orf19.2821, orf19.2820]

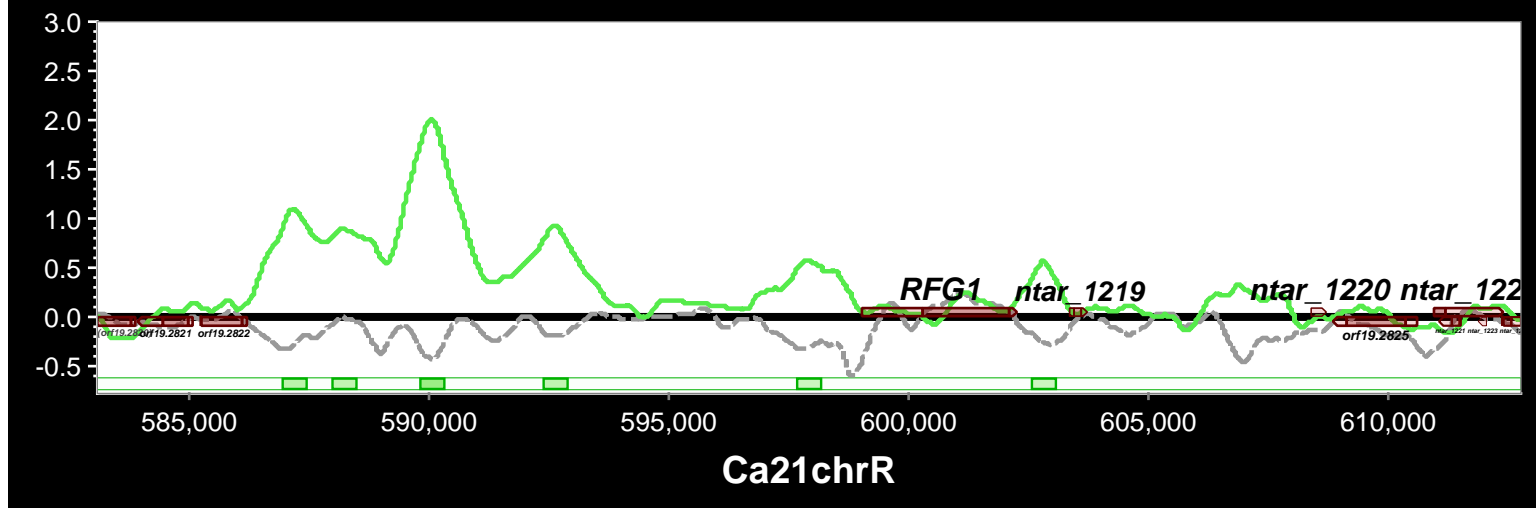



[0.568] Ca21chr4:495697-525380 [+] [ADR1, orf19.2751, orf19.2749, orf19.2748, orf19.2753]

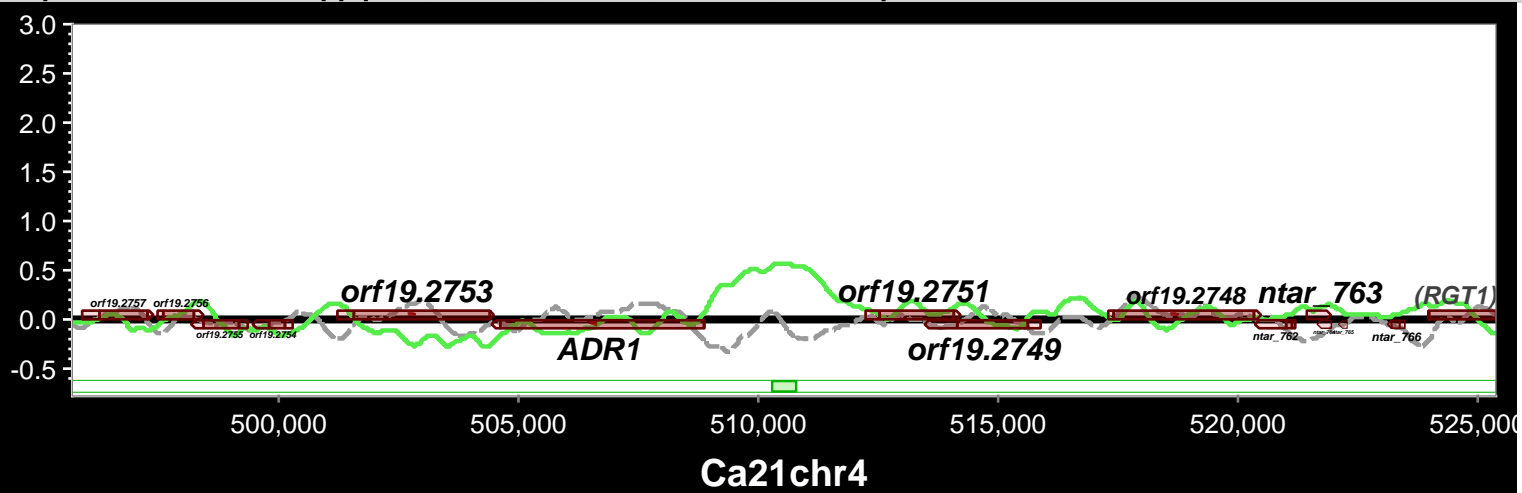

[0.567] Ca21chr5:693173-722856 [+] [orf19.4347, orf19.4346, orf19.4348, orf19.4342, orf19.4349]

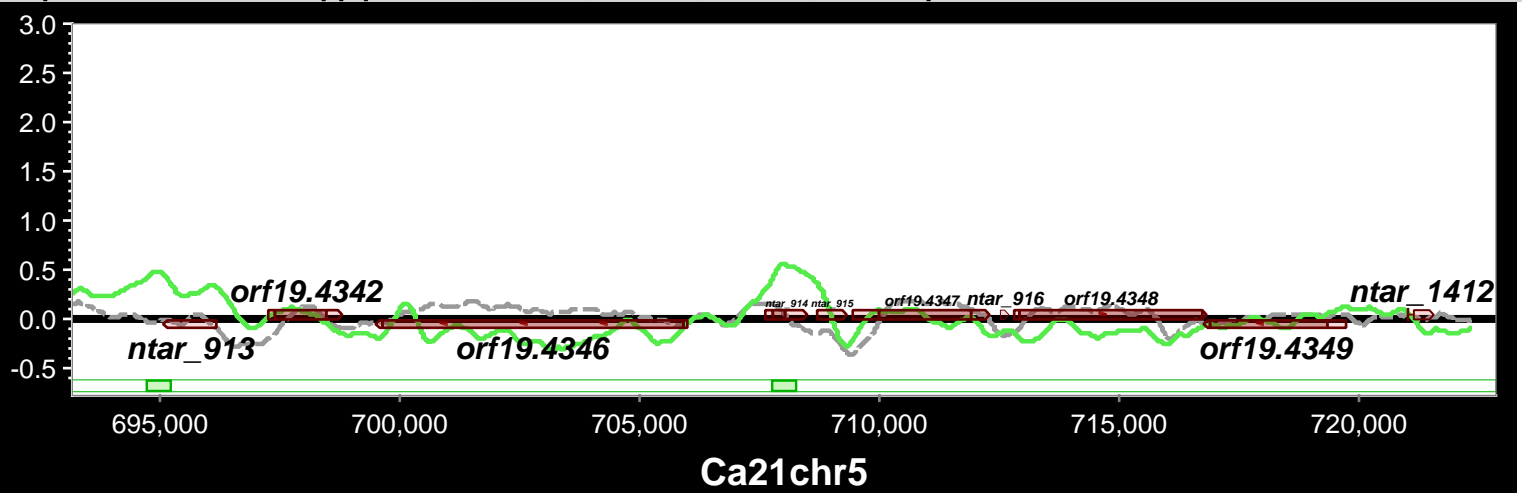

[0.567] Ca21chr6:64415-94098 [+] [orf19.4214, FET34, FET31, orf19.1204, orf19.1203.1]

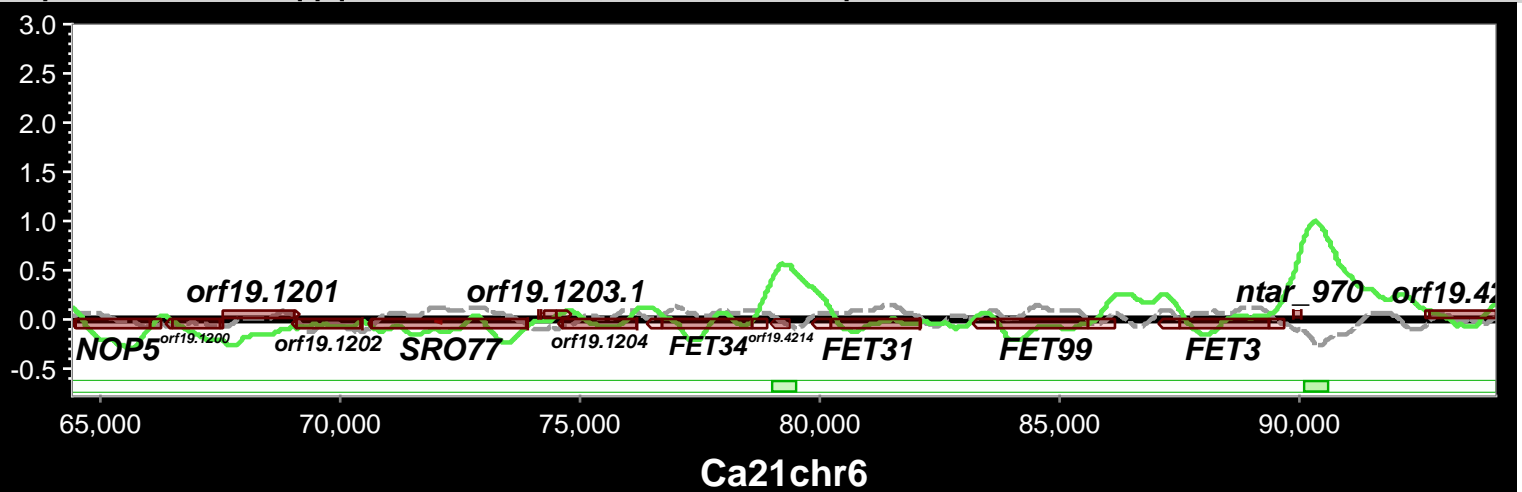

[0.564] Ca21chr5:911396-941079 [+] [orf19.3898, SDC1, orf19.3897, orf19.3900, orf19.3901]

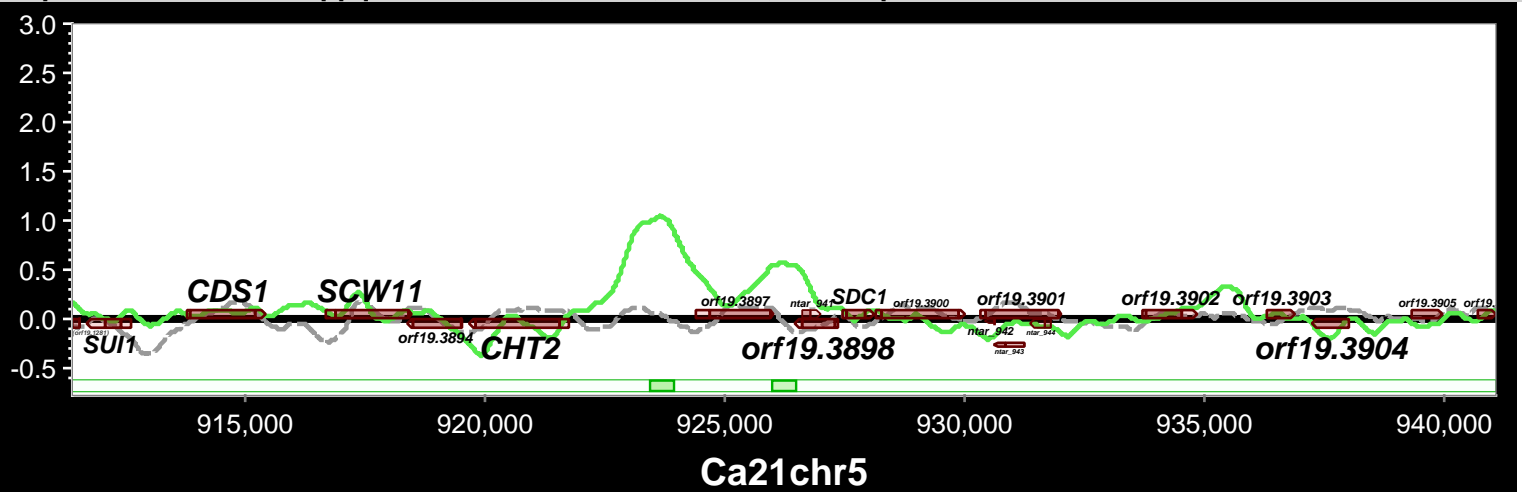

[0.562] Ca21chr1:704392-734075 [+] [t(N(GUU)3, orf19.3043, orf19.3042, orf19.3045, orf19.3041]

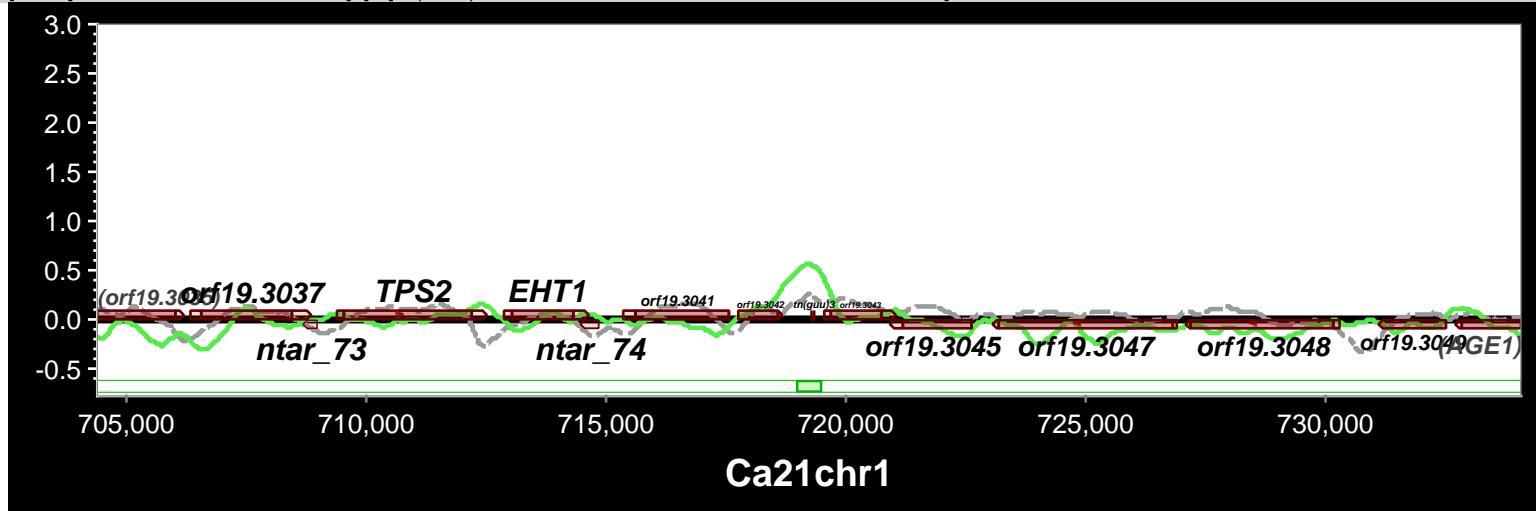

[0.562] Ca21chr1:879426-909109 [+] [orf19.1066, GPM2, SSA2, RPN4, ACS2]

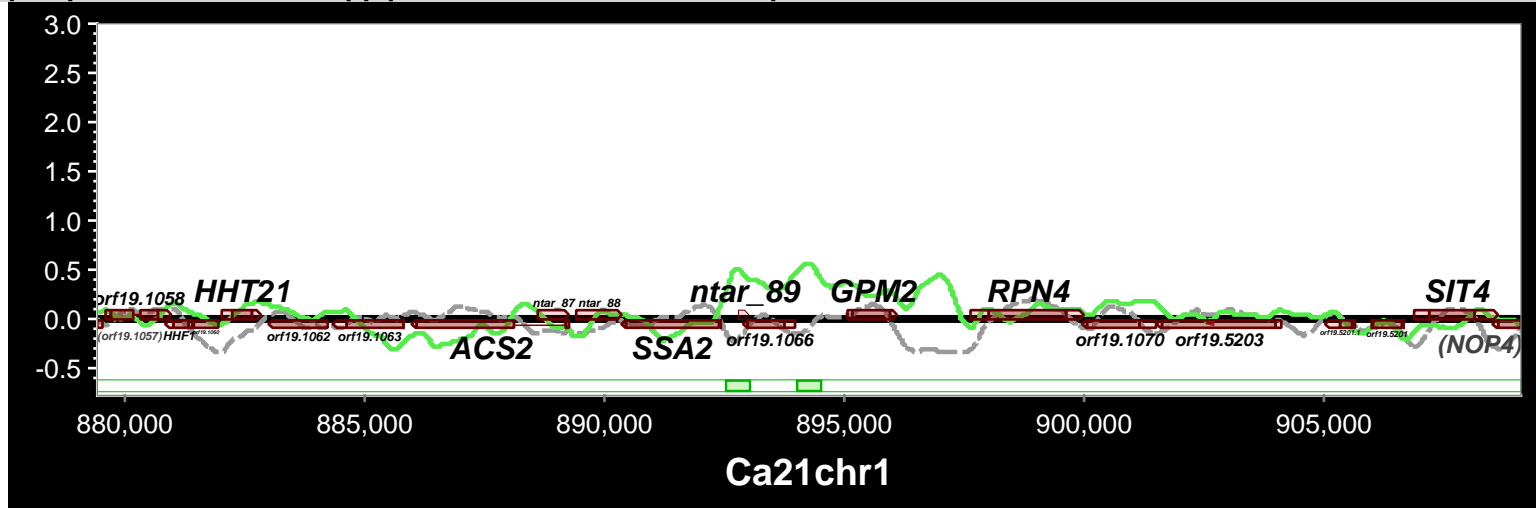

[0.562] Ca21chr1:1310204-1339887 [+] [orf19.1821, UME6, orf19.177, orf19.1823, PGA50]

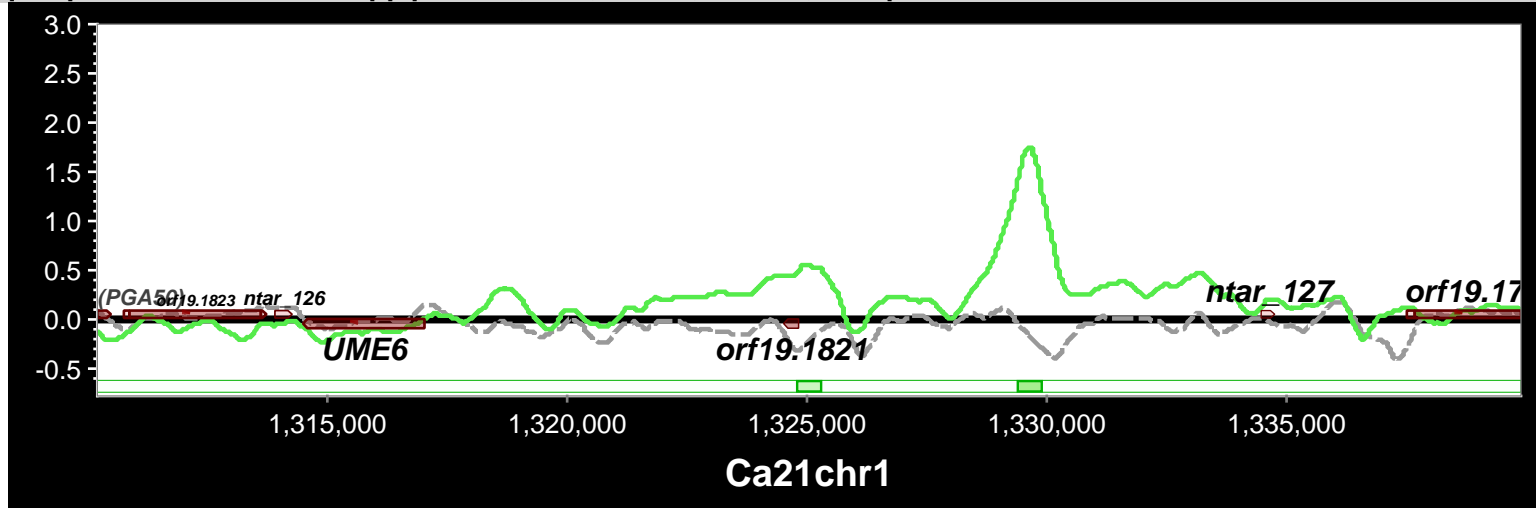

[0.562] Ca21chr4:212204-241887 [+] [t(D(GUC)6, AGP2, orf19.4678, orf19.4677, orf19.4680]

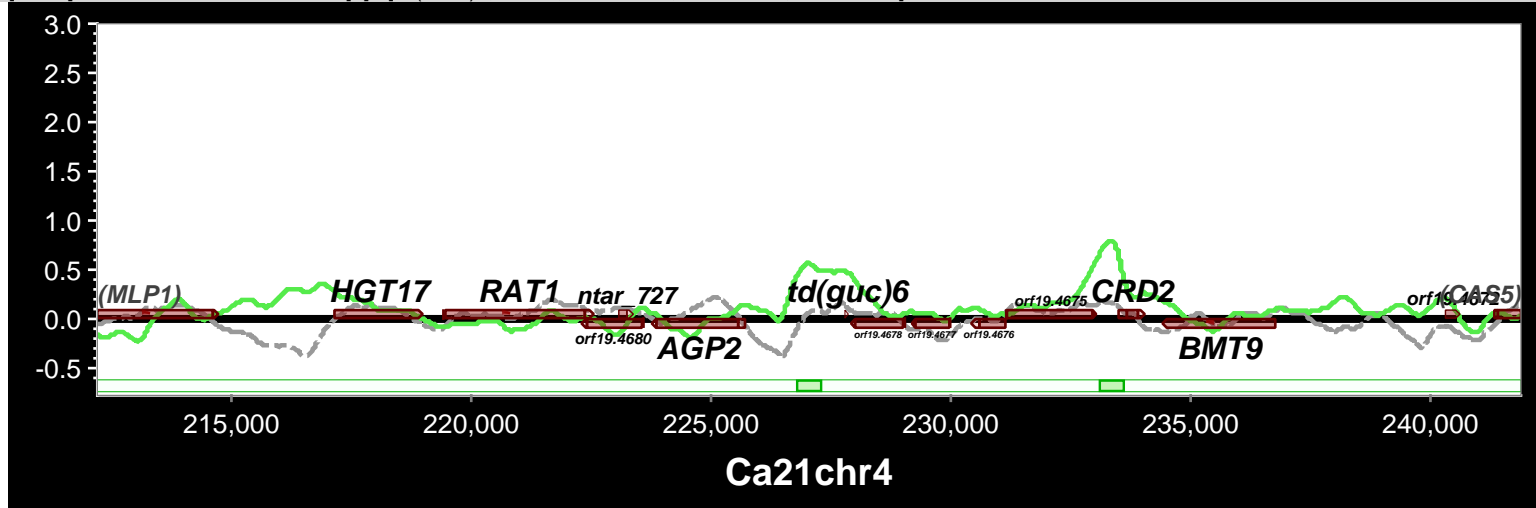

[0.562] Ca21chr6:399705-429388 [+] [orf19.692, GPD2, orf19.3508, MCR1, DBR1]

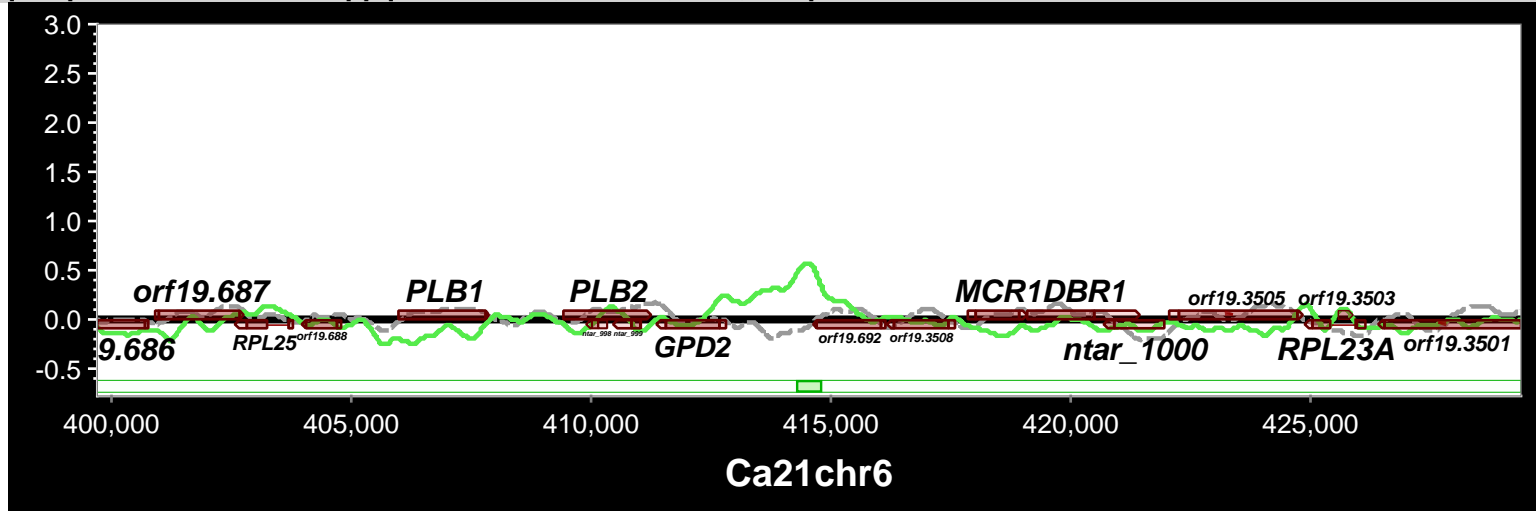

[0.562] Ca21chrR:587979-617662 [+] [RFG1, orf19.2825, orf19.2826, orf19.2827]

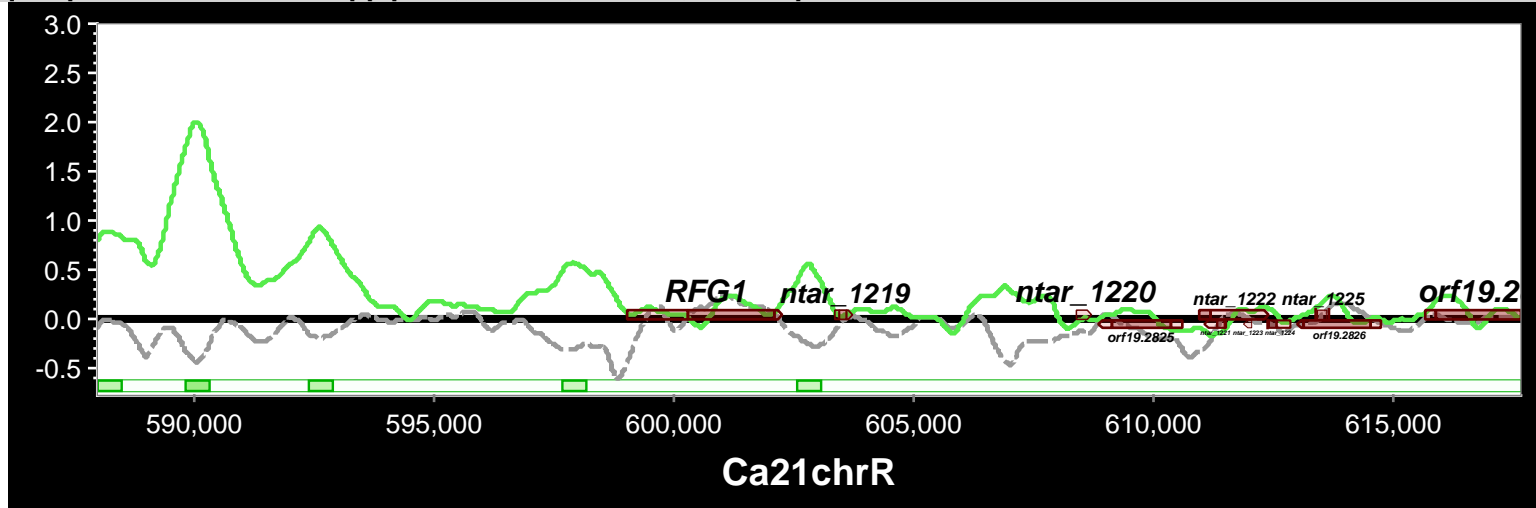

[0.558] Ca21chr3:688460-718143 [+] [tE(UUC)1, orf19.332.1, FCY2, orf19.332, orf19.330.1]

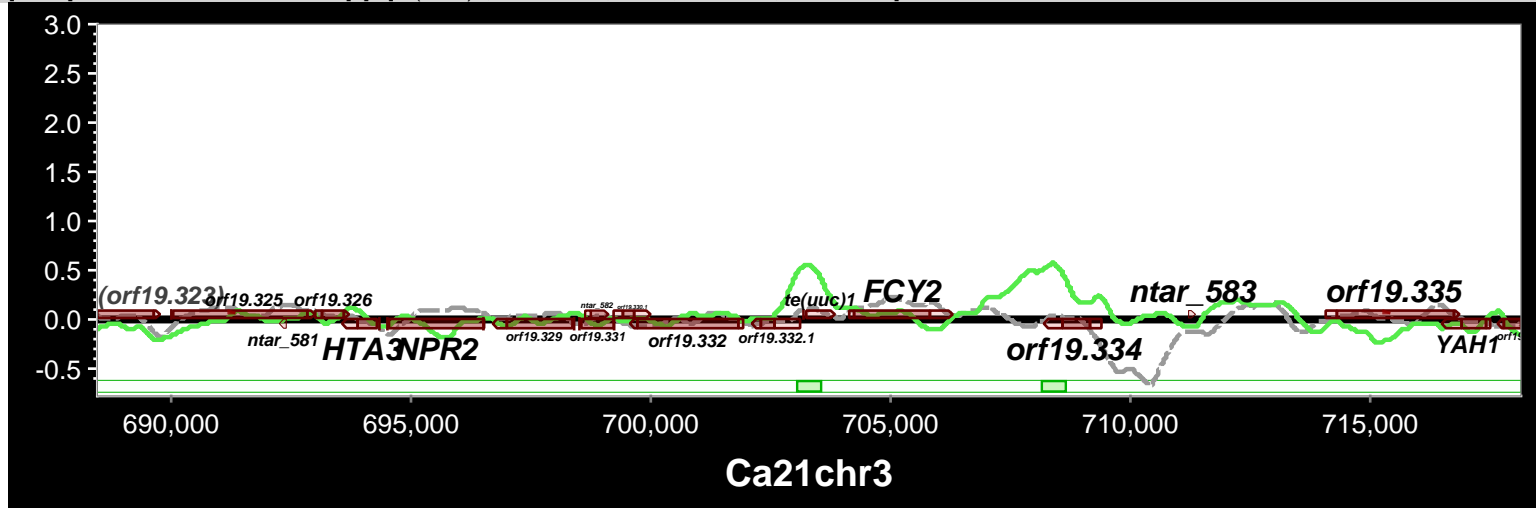

[0.557] Ca21chr3:1556007-1585690 [+] [FCR1, orf19.6816, TDH3, orf19.6813, PMT2]

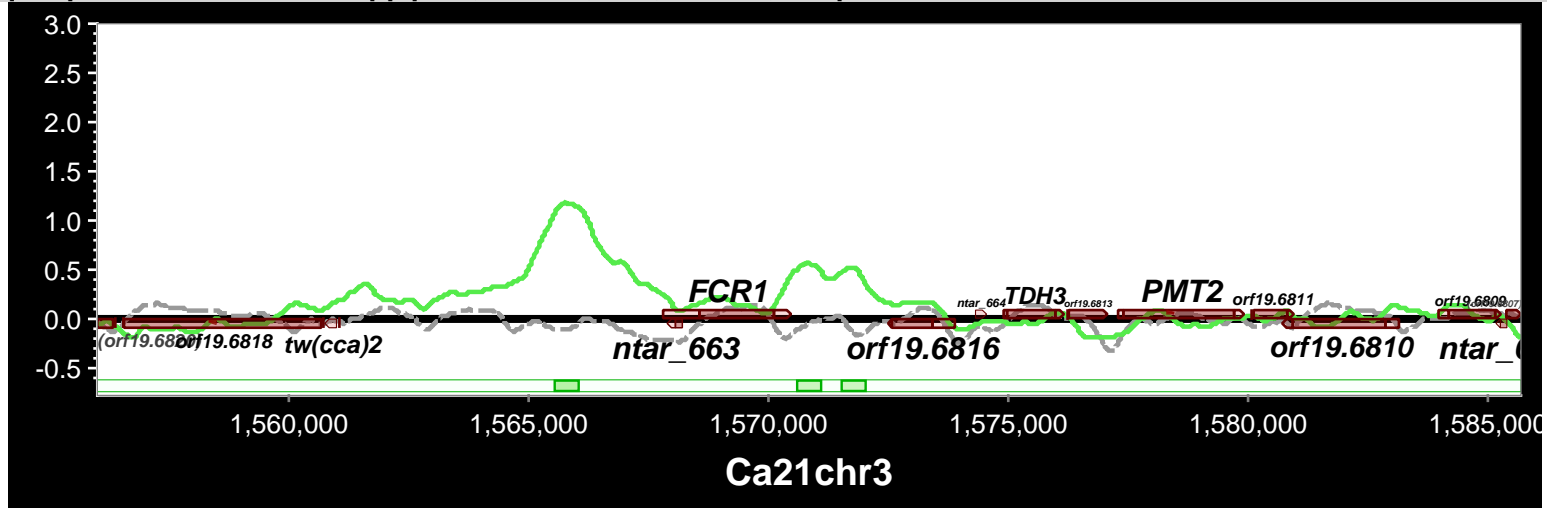

[0.554] Ca21chr1:390829-420512 [+] [HGT1, orf19.4528, orf19.4529, orf19.4530.1, HSP30]

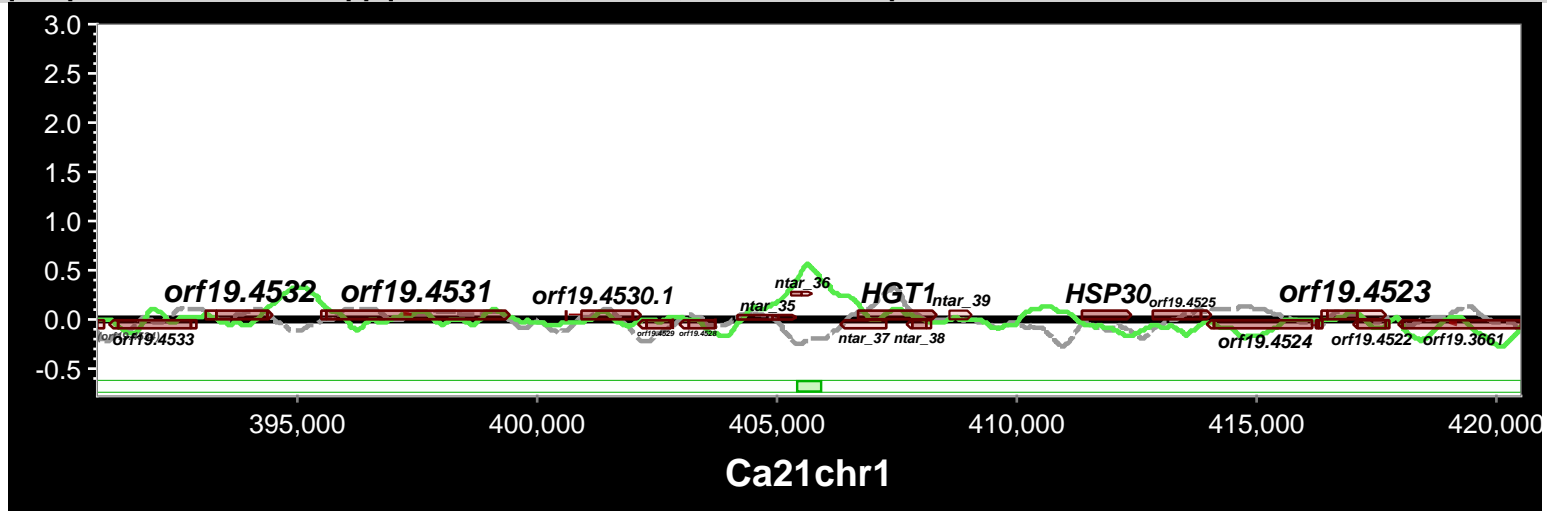

[0.554] Ca21chr3:1590656-1620339 [+] [POS5, SSN6, RPD31, orf19.6802, HUT1]

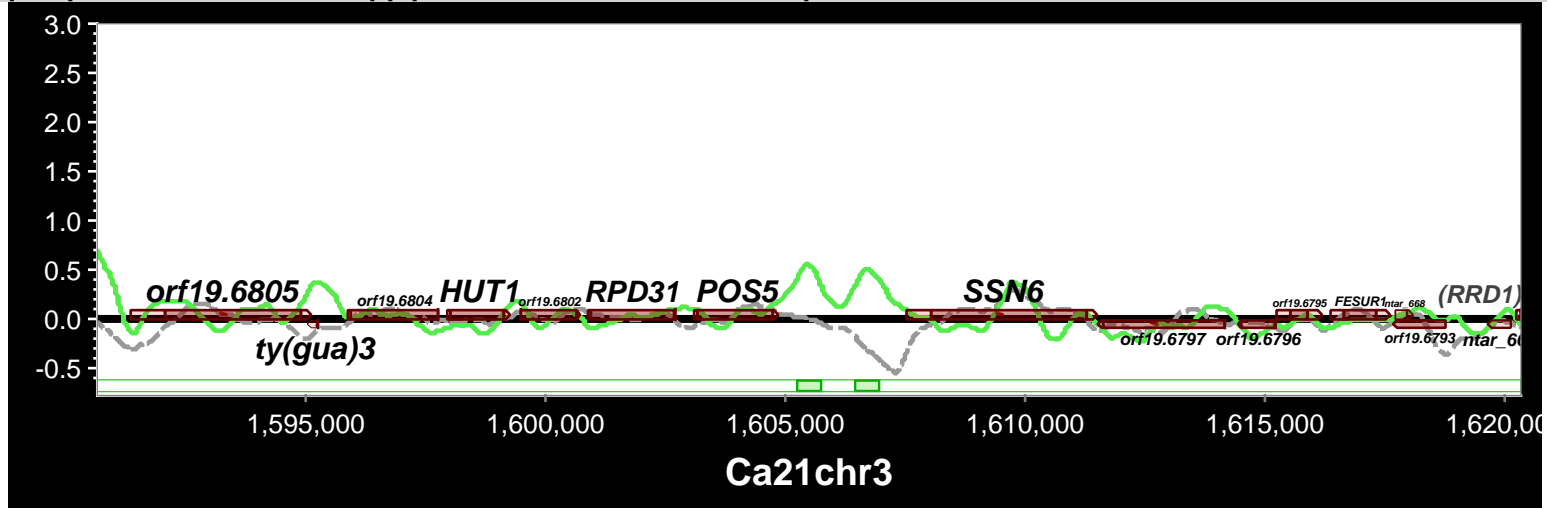

[0.553] Ca21chr1:2712894-2742577 [+] [tw(CCA)1, RAX2, orf19.3767, GSG1, orf19.68.2]

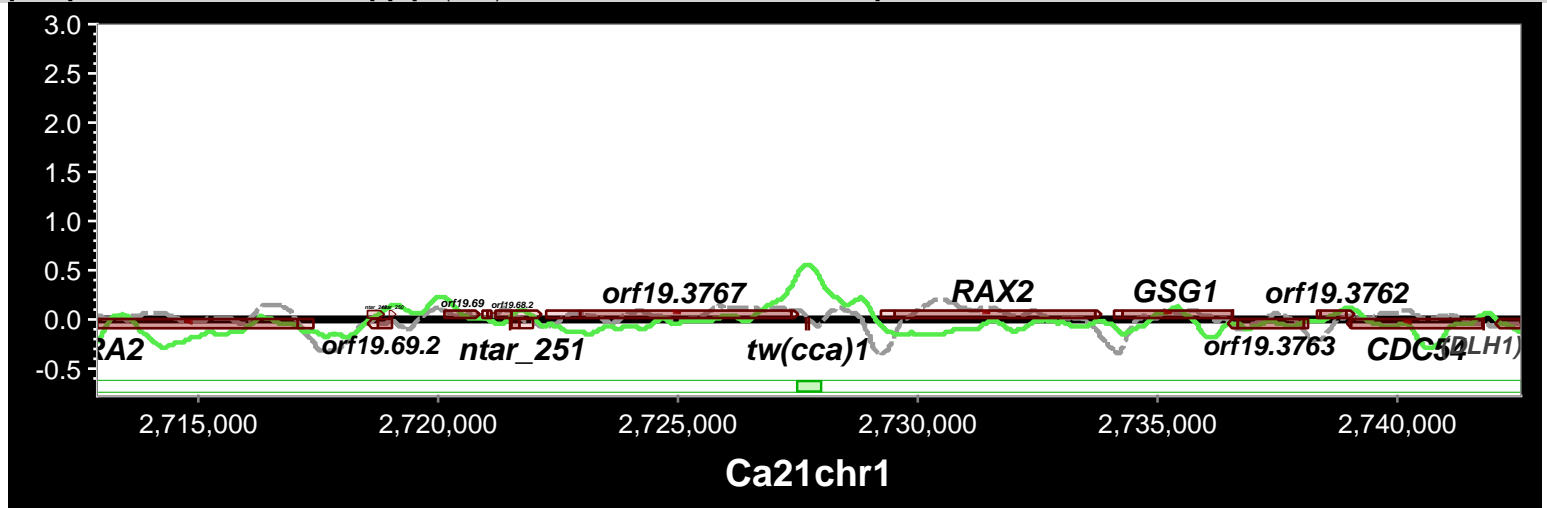

[0.553] Ca21chr2:1606868-1636551 [+] [tA(AGC)1, orf19.2184, tI(AAU)2, NSA1, KRE30]

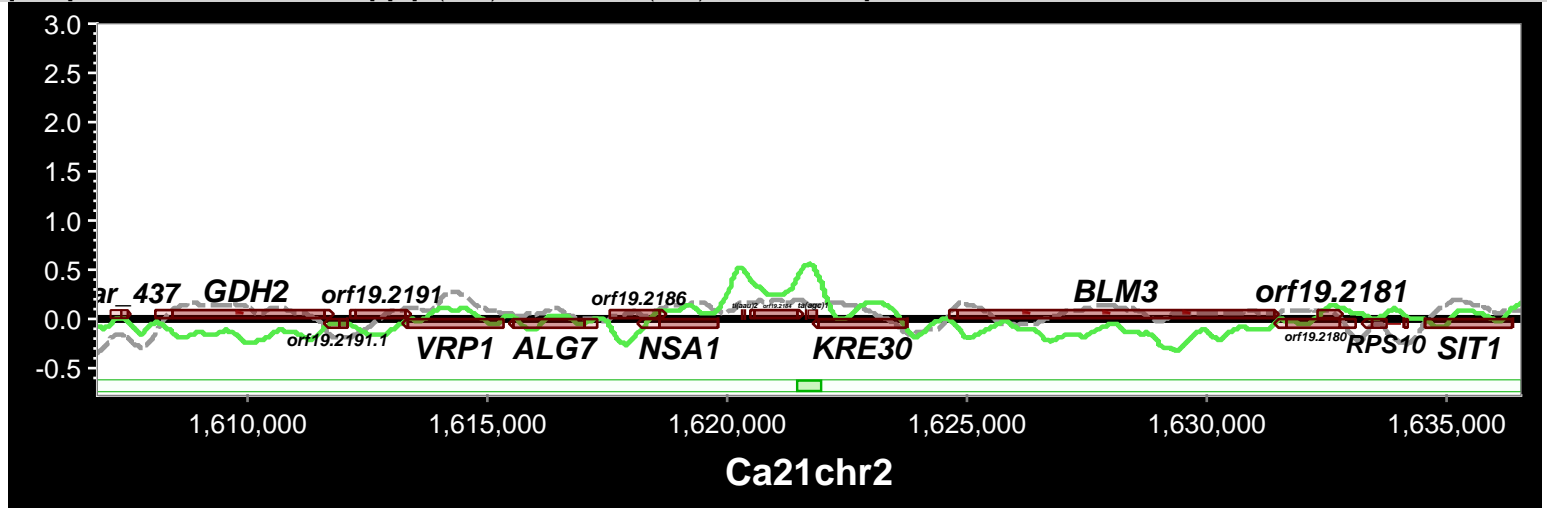



[0.542] Ca21chr1:1142418-1172101 [+] [RPS27A, orf19.413, orf19.414, orf19.415, orf19.412]

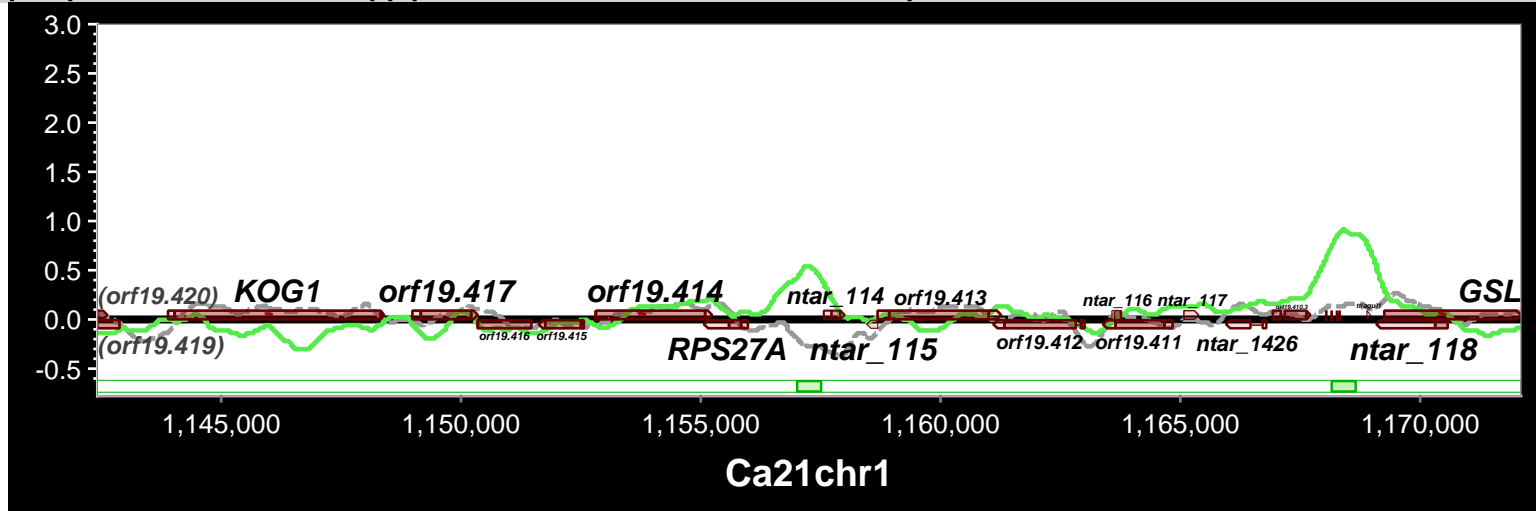

[0.542] Ca21chr1:2831774-2861457 [+] [FAD3, OP4, orf19.4932, RPL14, orf19.4936]

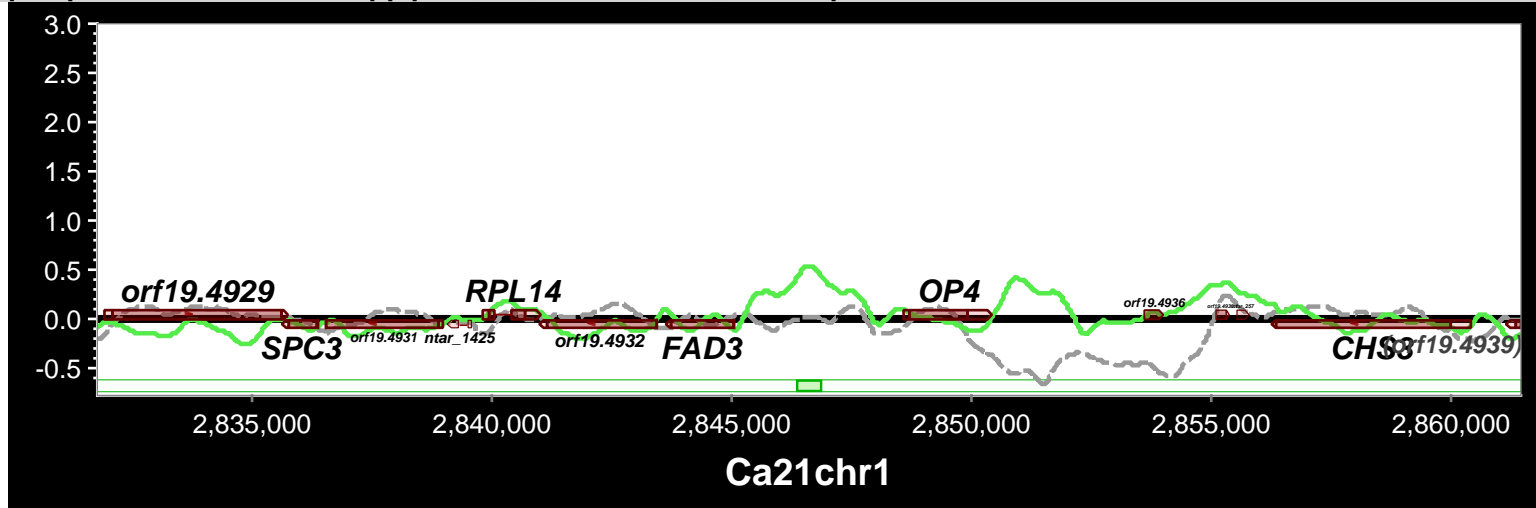

[0.541] Ca21chr1:1555391-1585074 [+] [tl(AAG)2, CEN1, RME1, orf19.4439, orf19.4439.1]

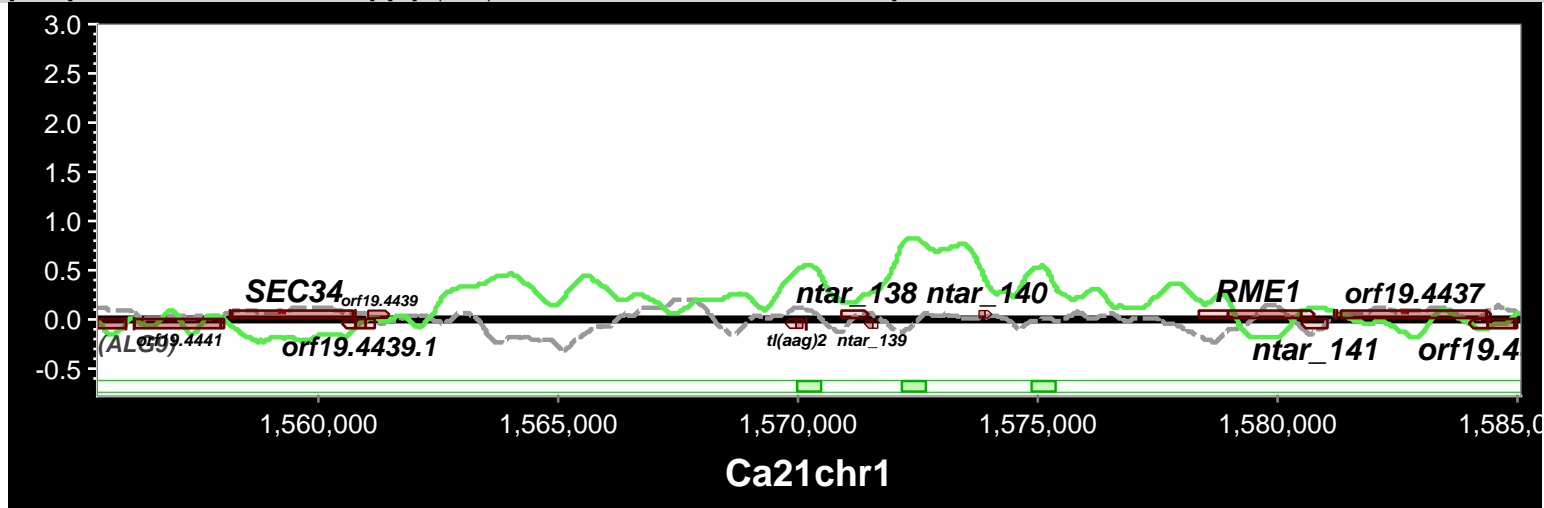

[0.541] Ca21chr5:232352-262035 [+] [CLN3, orf19.1959, orf19.1961, CYC3]

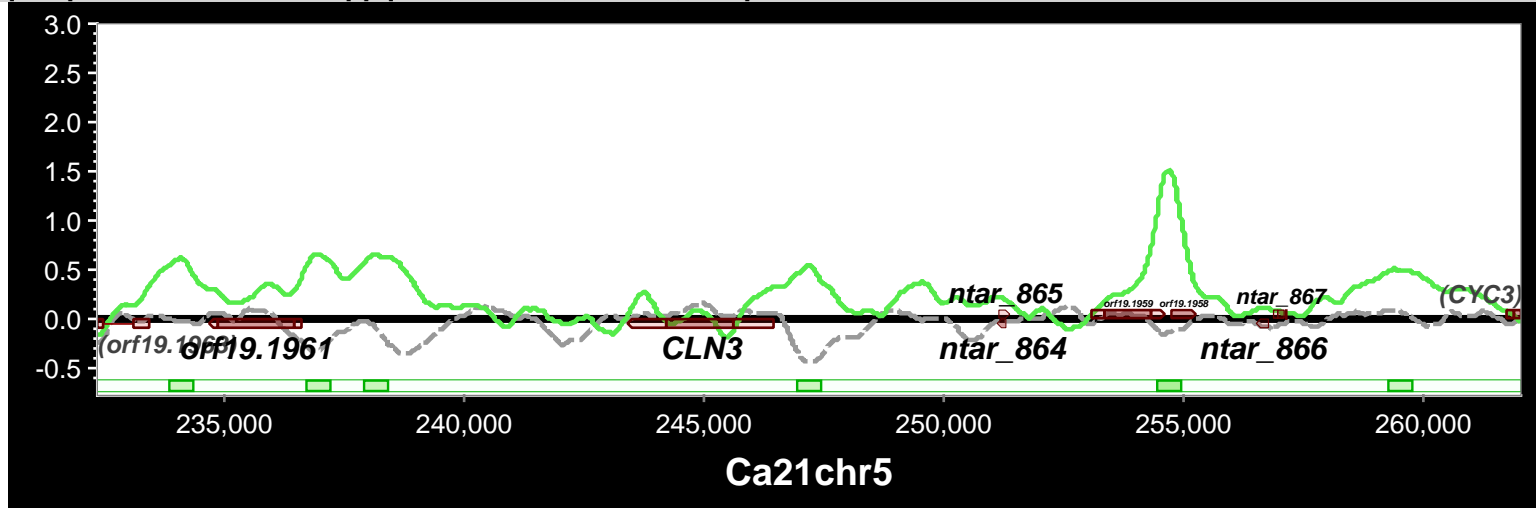

[0.54] Ca21chr4:549832-579515 [+] [orf19.2725, orf19.2726, GRX3, orf19.2724, orf19.2728]

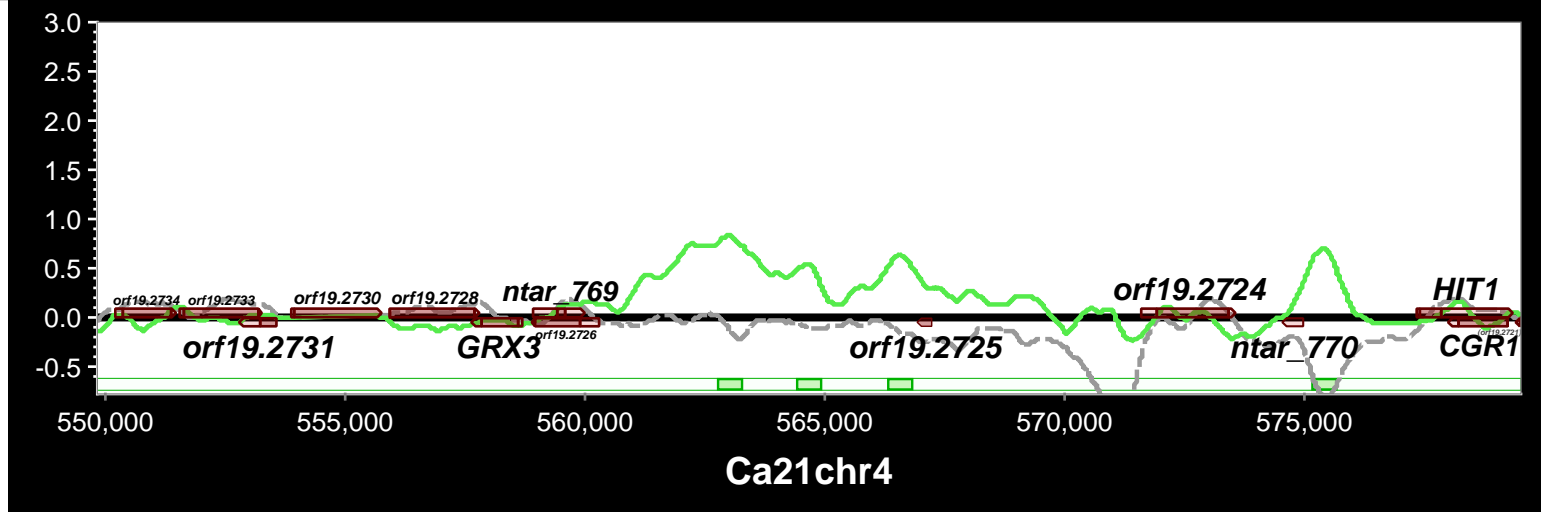

[0.532] Ca21chr1:1640043-1669726 [+] [orf19.2781, orf19.2779, orf19.2782, orf19.2778, PIR32]

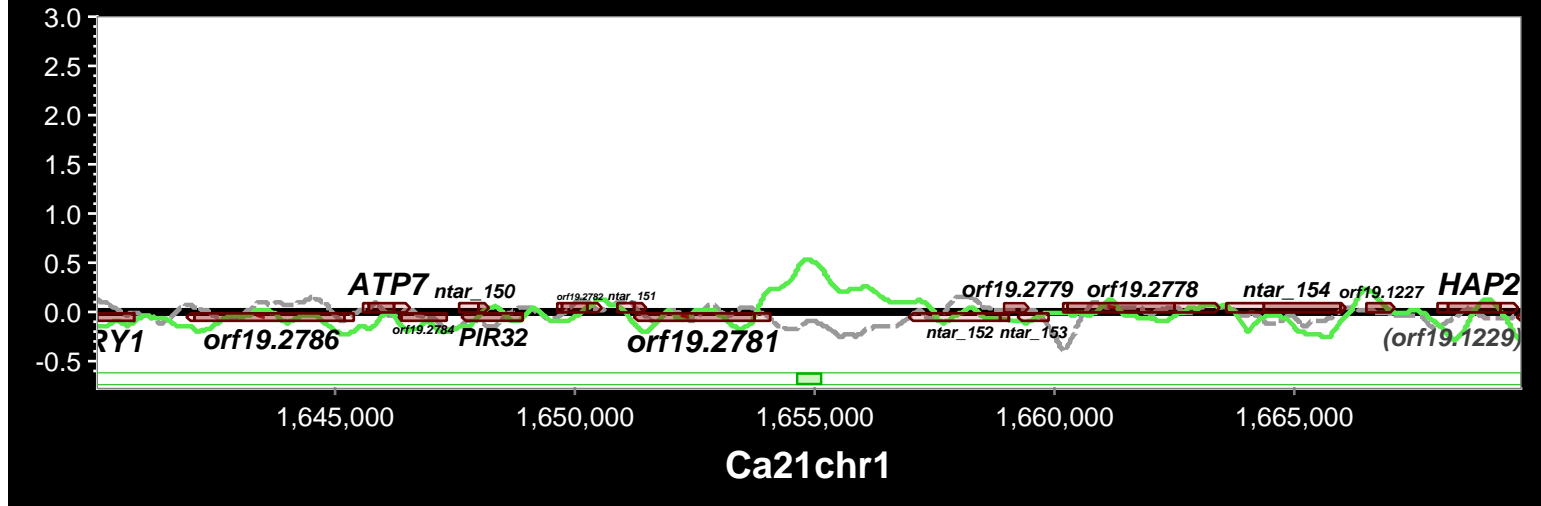

[0.532] Ca21chr3:1318216-1347899 [+] [CTA4, MRR1, orf19.7375, orf19.7376, orf19.7371]

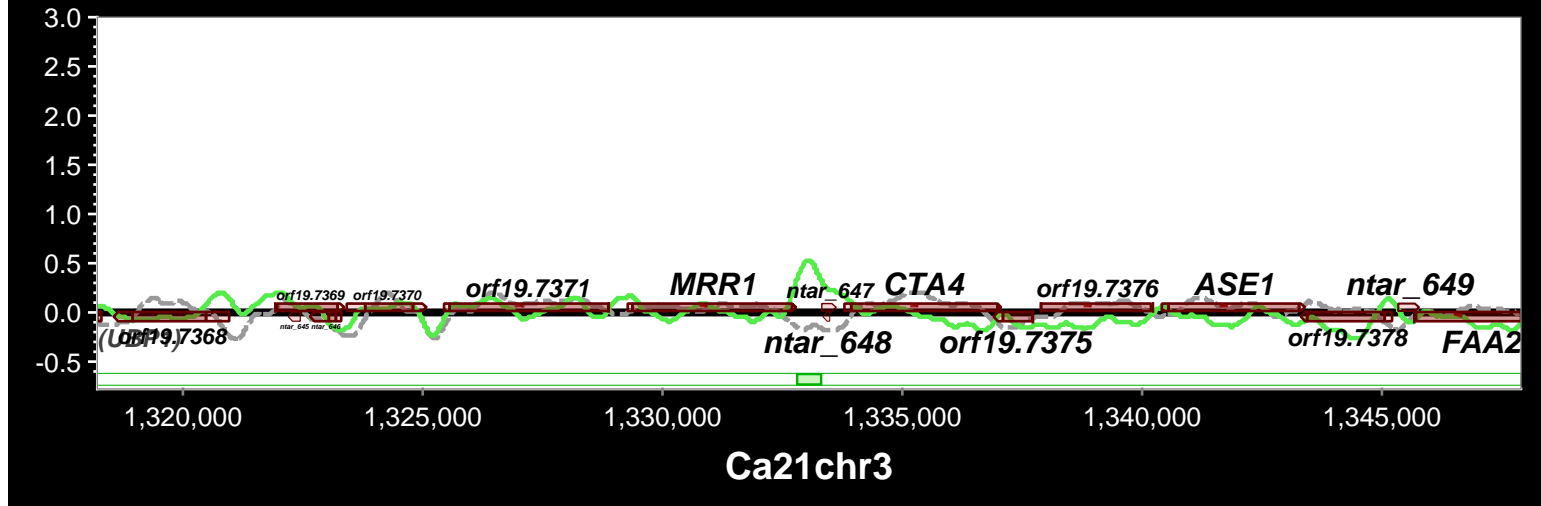

[0.532] Ca21chr4:1086629-1116312 [+] [HAP41, orf19.741, ALD6, MYO5, orf19.736]

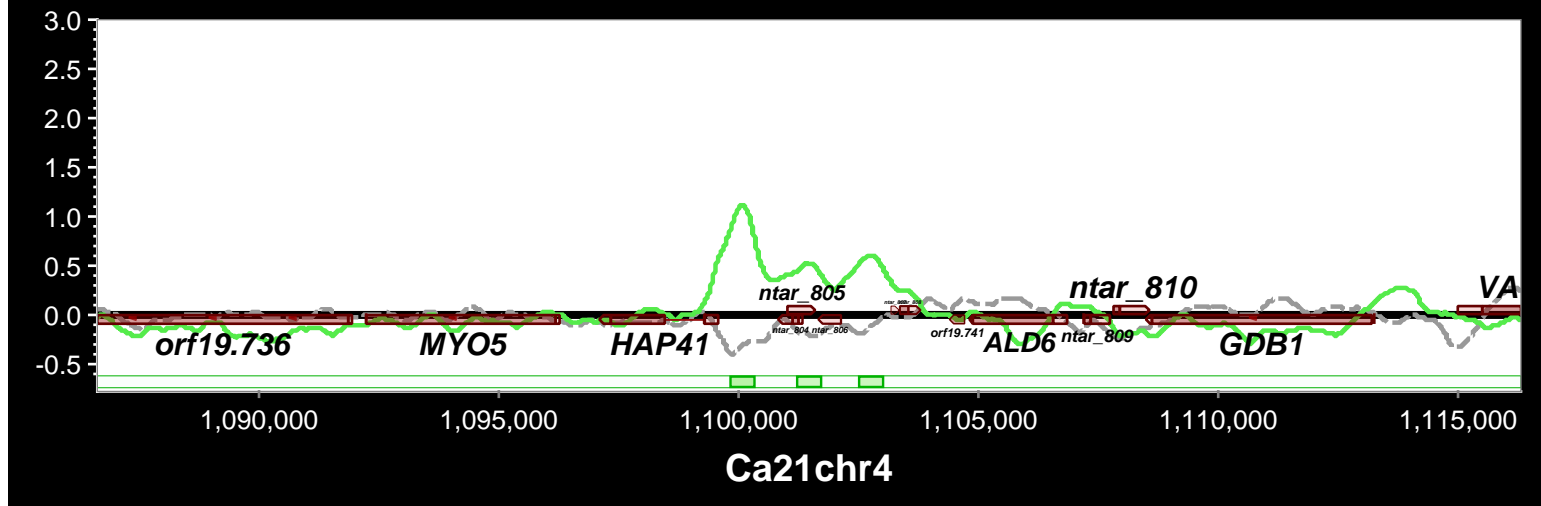

[0.532] Ca21chr4:1302156-1331839 [+] [PGA49, PPS1, VPS11, tT(UGU)2, orf19.4406]

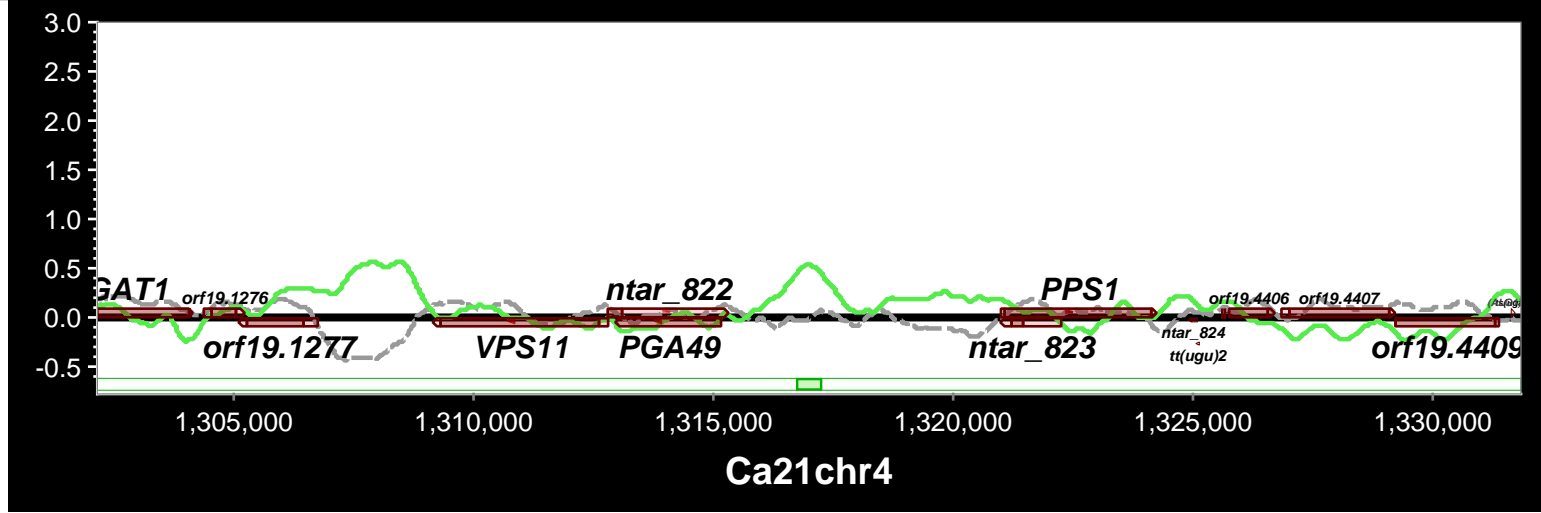

[0.532] Ca21chr5:754720-784403 [+] [tE(UUC)5, orf19.2639, orf19.2639.1, orf19.2638, FUR1]

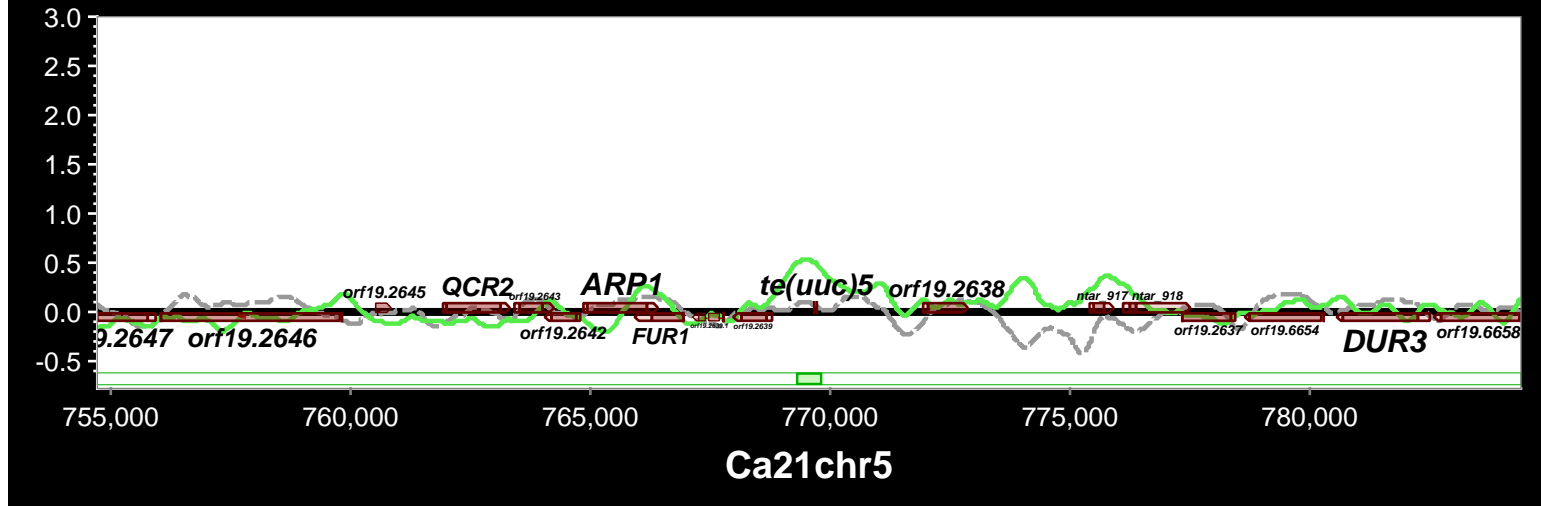

[0.531] Ca21chr1:1579166-1608849 [+] [CPH1, KSP1, orf19.4430, orf19.4435, orf19.4436]

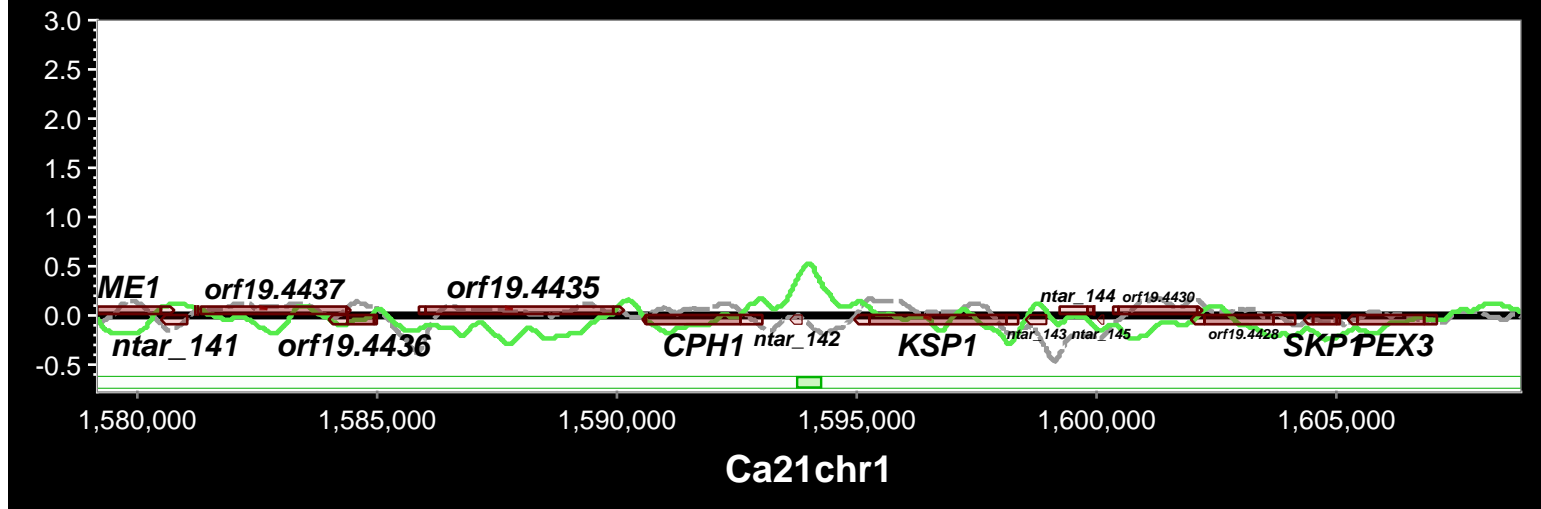

[0.531] Ca21chr2:1792058-1821741 [+] [BUD20, orf19.217, PIR1, orf19.216.1, orf19.216]

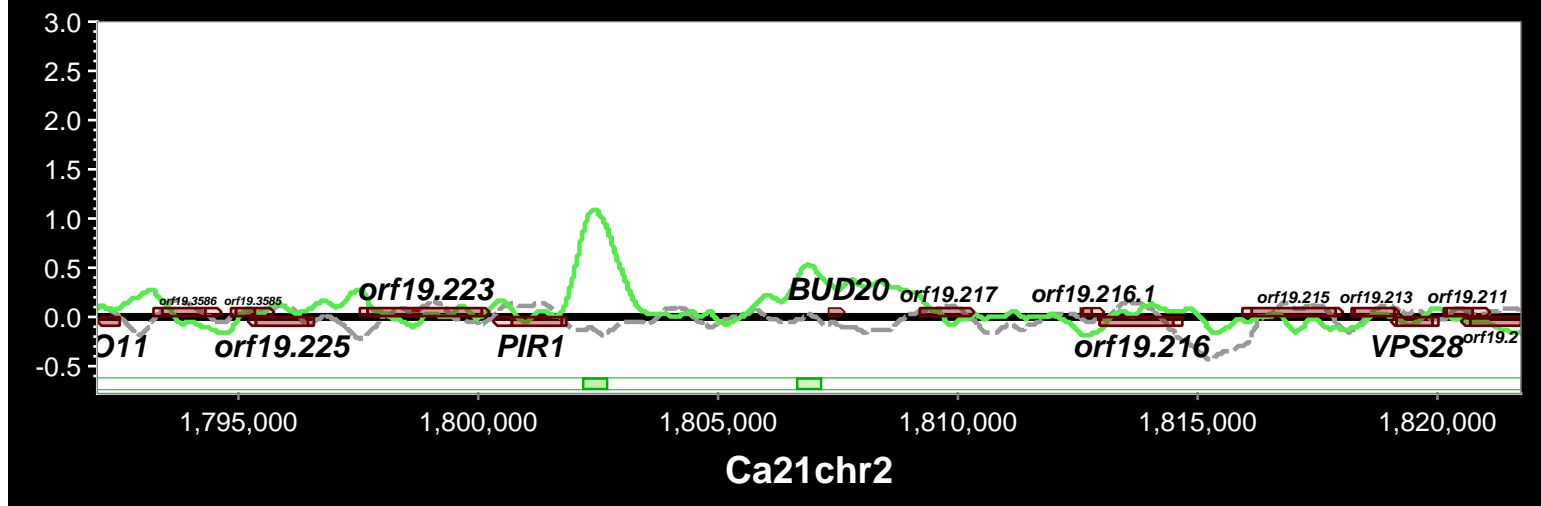



[0.531] Ca21chr4:841655-871338 [+] [orf19.5311, orf19.5312, orf19.5308, orf19.1208, JEN2]

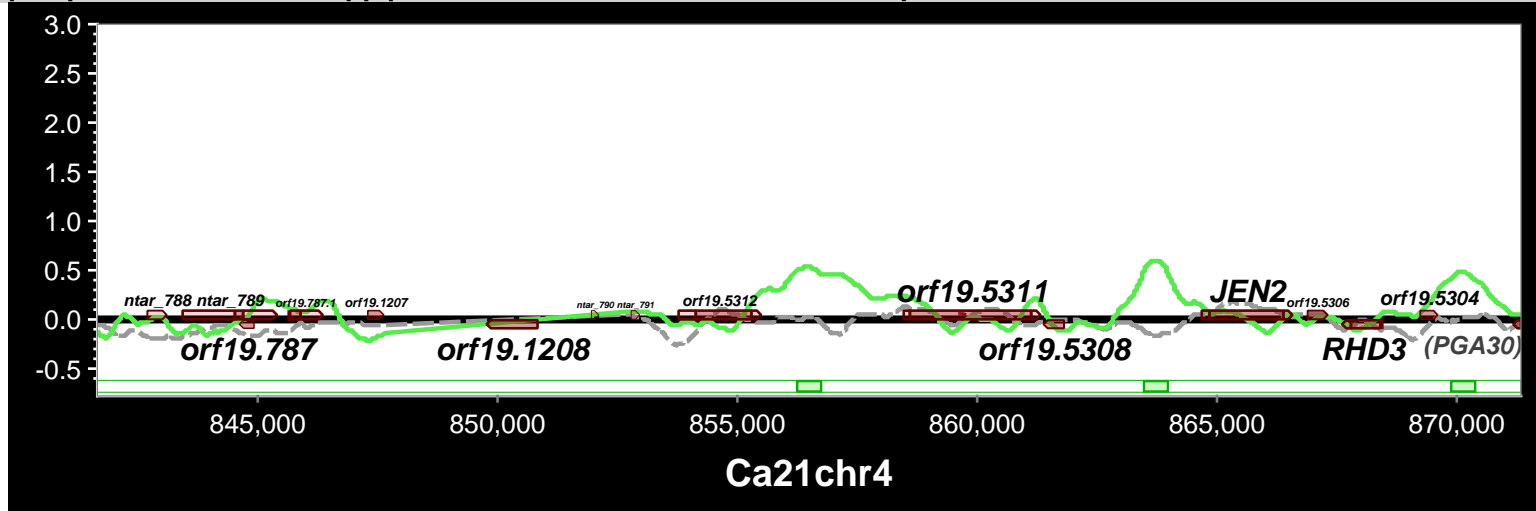

[0.531] Ca21chr6:653871-683554 [+] [MDR1, BMT6, orf19.5605, orf19.5606, orf19.5601]

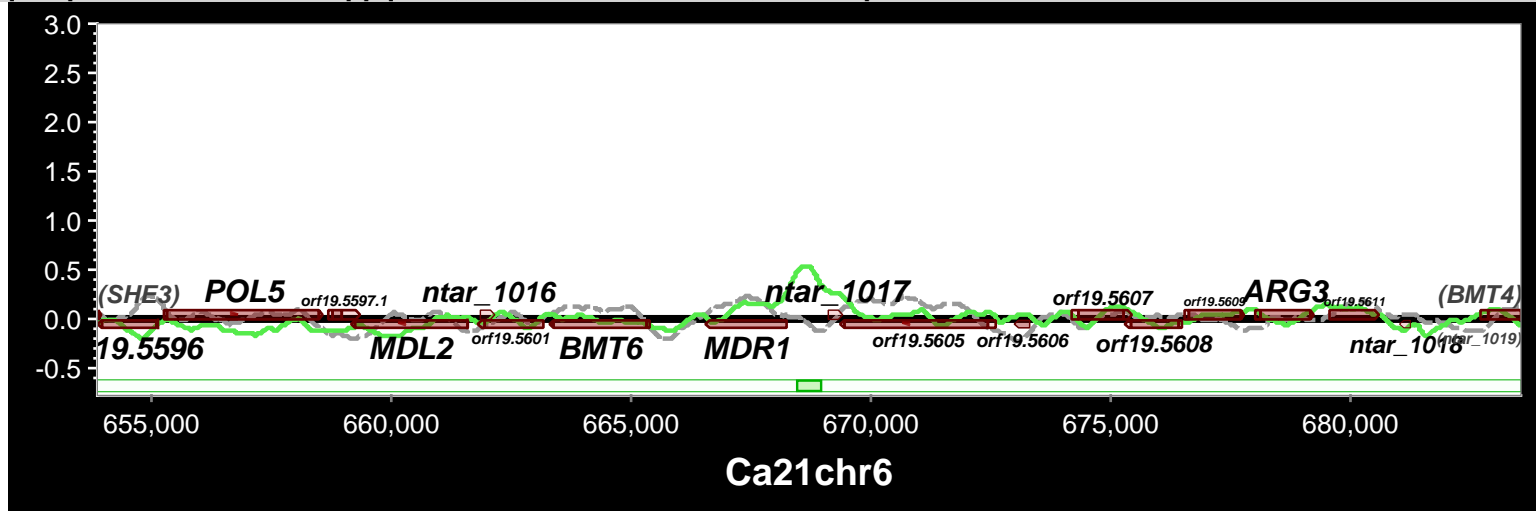

[0.53] Ca21chr3:1430463-1460146 [+] [ALS7, ISW2, TSA1B, HNT2, orf19.7420]

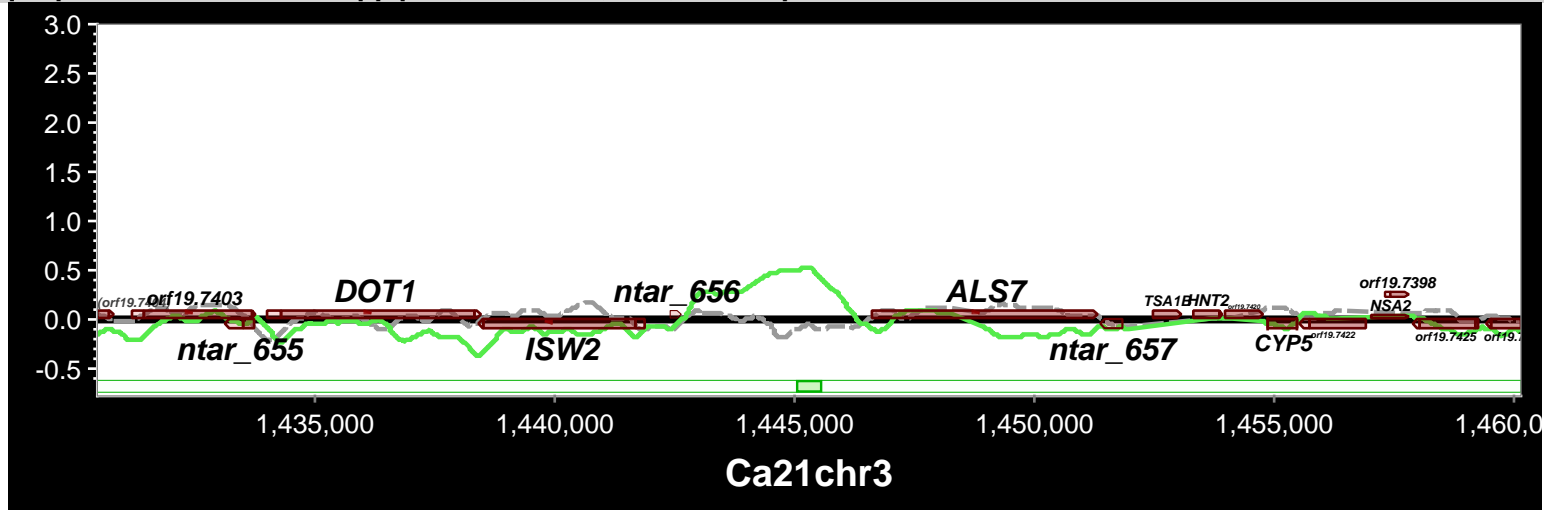

[0.53] Ca21chr5:415833-445516 [+] [GIS2, orf19.3180, orf19.3181.1, orf19.3178, orf19.3183]

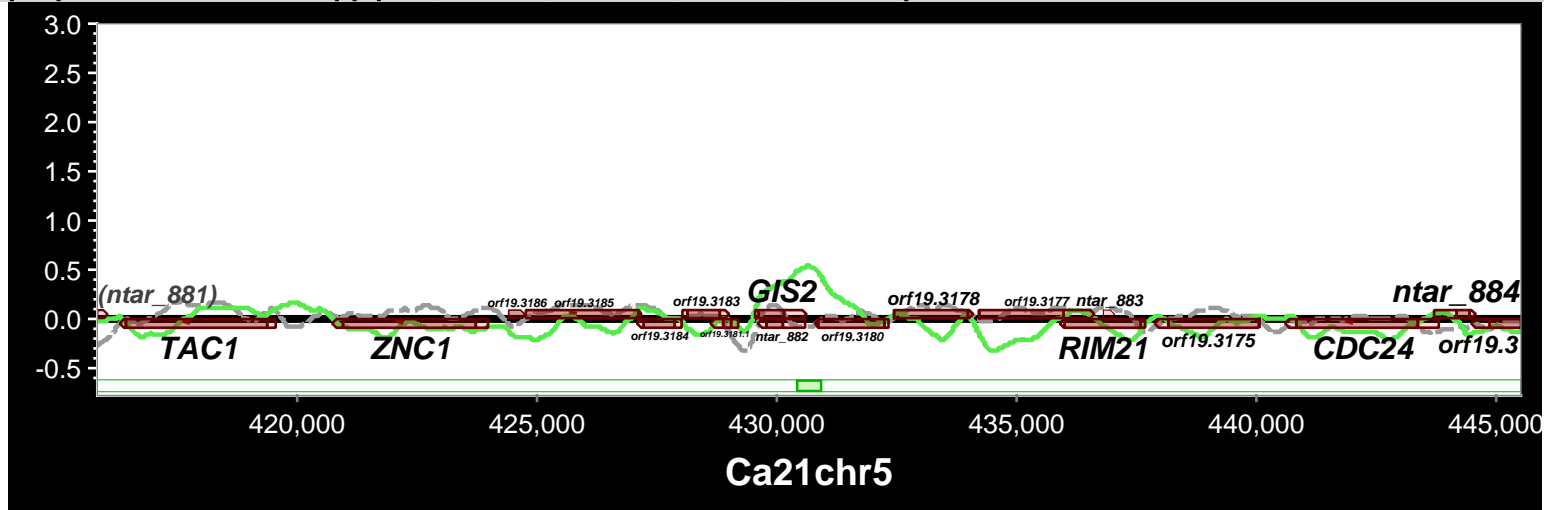

[0.527] Ca21chr3:117496-147179 [+] [PMA1, orf19.5381, orf19.5382, LYS144, CHS8]

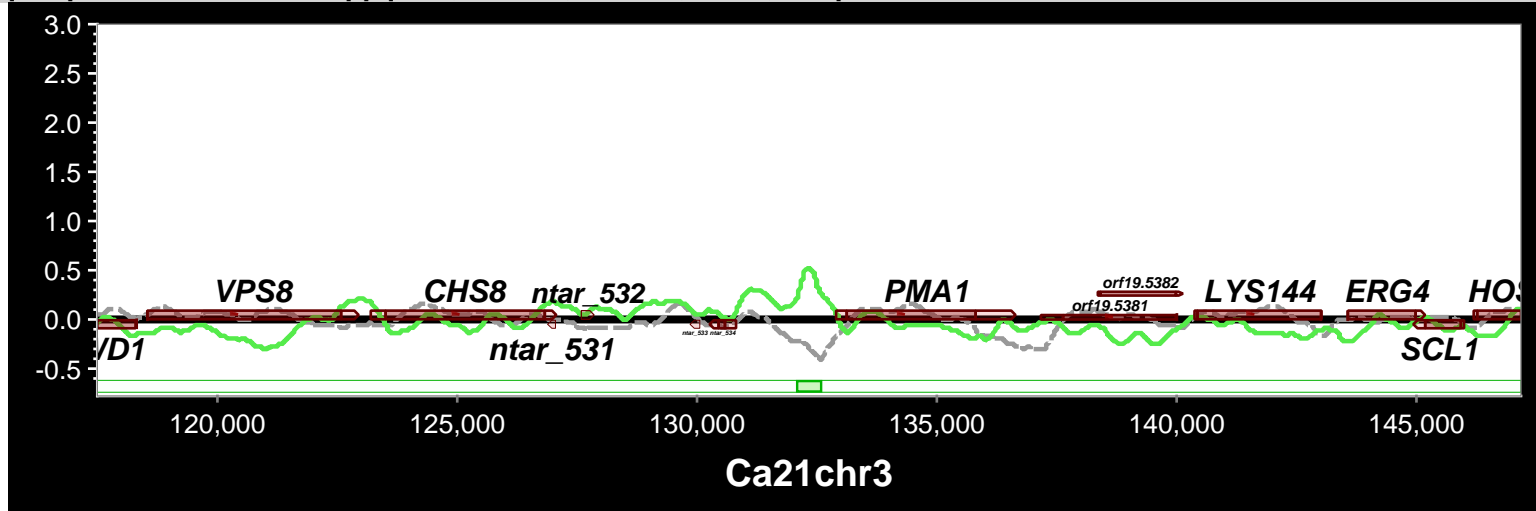

[0.524] Ca21chr3:559237-588920 [+] [orf19.257, orf19.255, orf19.258, orf19.259, orf19.254]

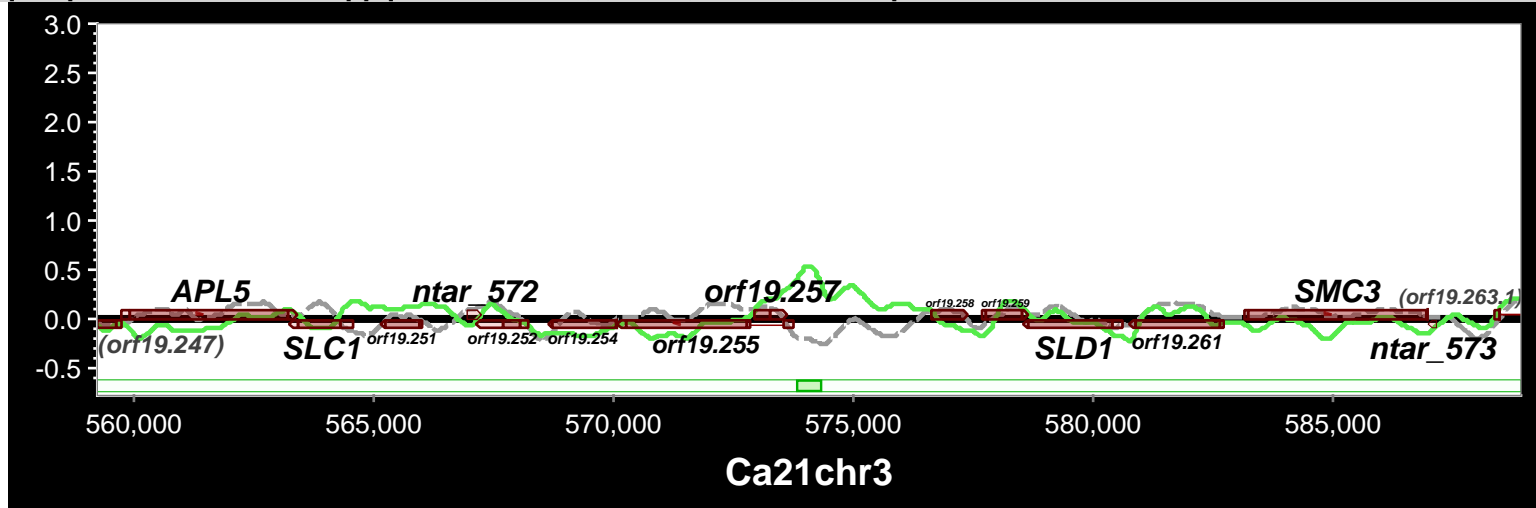

[0.524] Ca21chrR:1729772-1759455 [+] [orf19.599, CENR, TRK1, orf19.598, orf19.597]

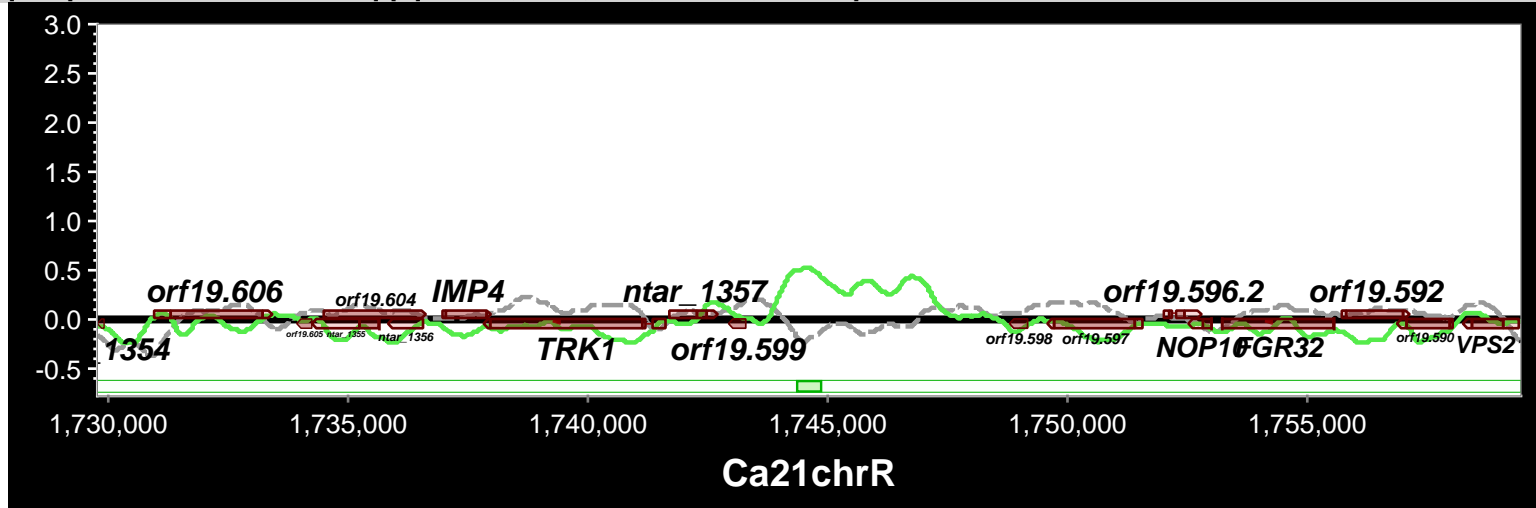

[0.524] Ca21chrR:2034516-2064199 [+] [tn(GUU)4, orf19.6599.1, WAL1, orf19.6600, orf19.6601]

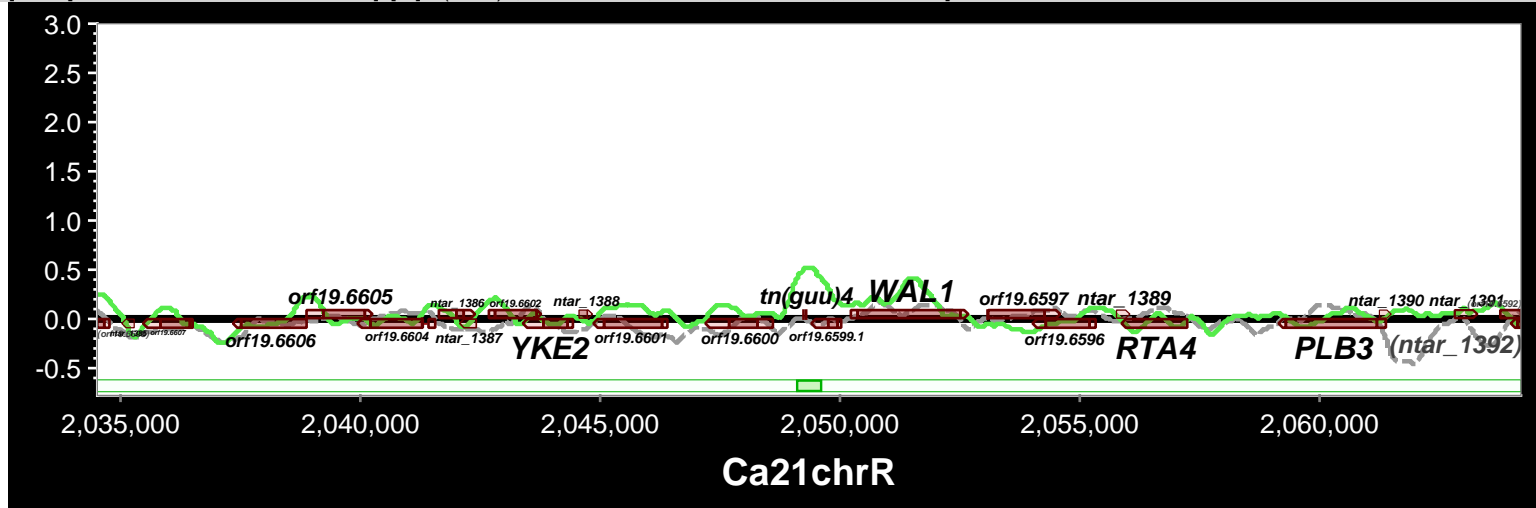

[0.52] Ca21chr1:557644-587327 [+] [orf19.2962, orf19.2963, orf19.2961, orf19.2964, FRS2]

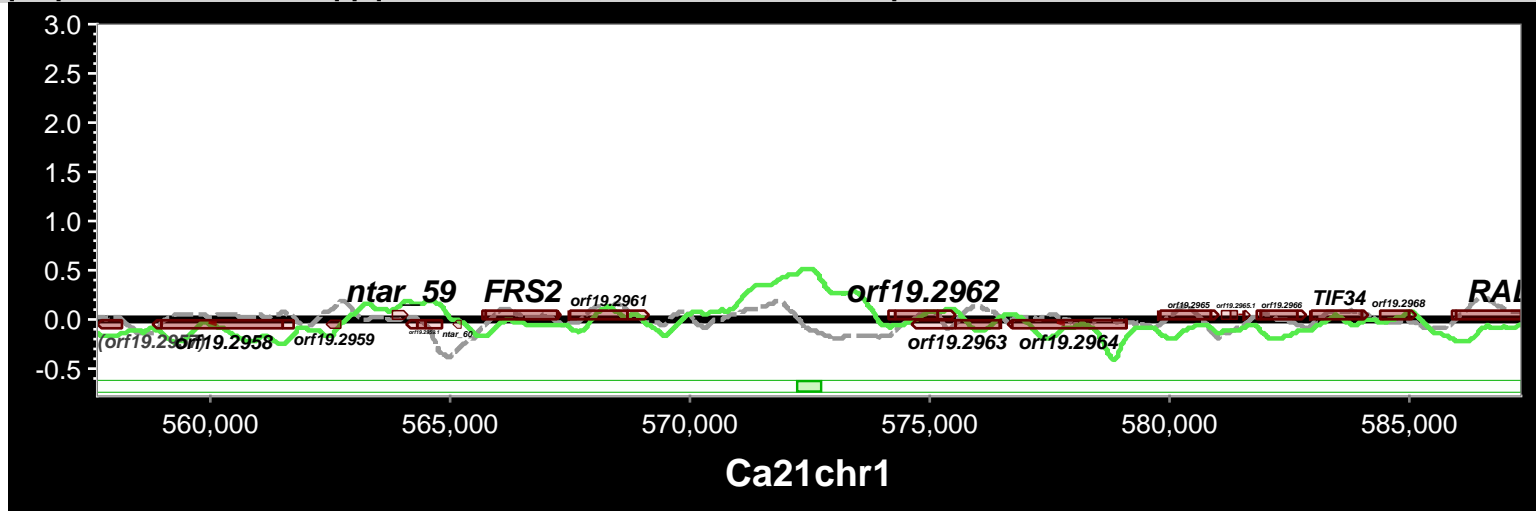

[0.52] Ca21chr3:193723-223406 [+] [orf19.2506, orf19.2505, ARP9, BMS1, orf19.2503]

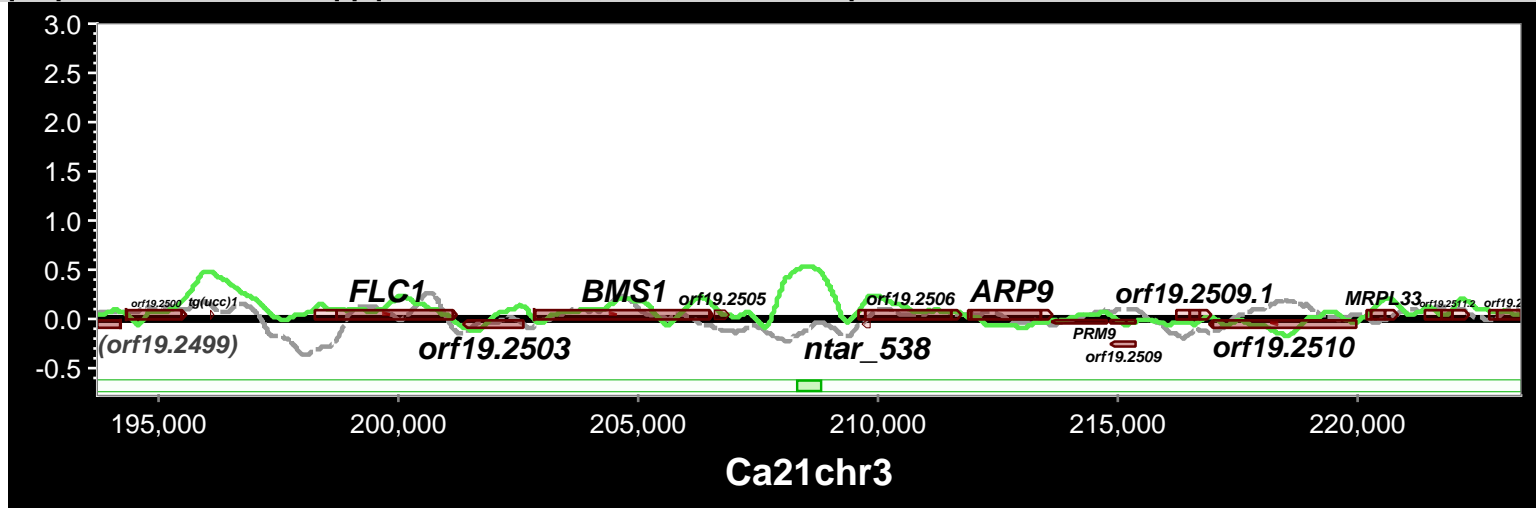

[0.52] Ca21chr3:1556935-1586618 [+] [orf19.6816, TDH3, FCR1, orf19.6813, PMT2]

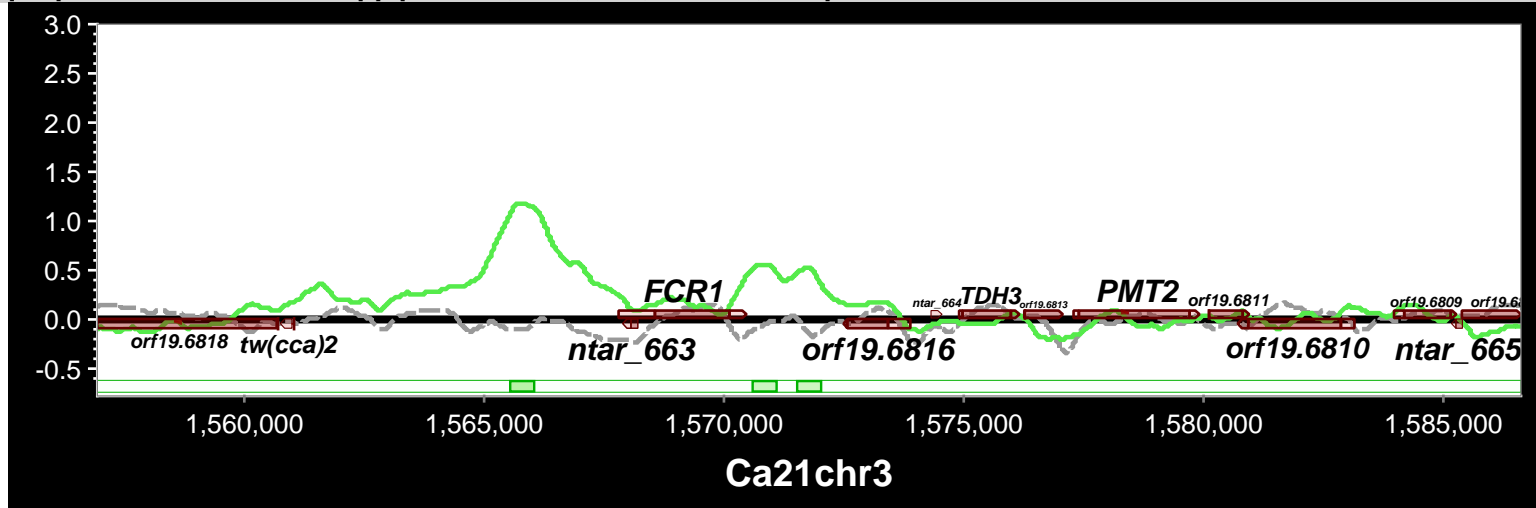

[0.518] Ca21chr2:795665-825348 [+] [tF(GAA)3, tR(UCU)3, GNA1, INO4, orf19.836.1]

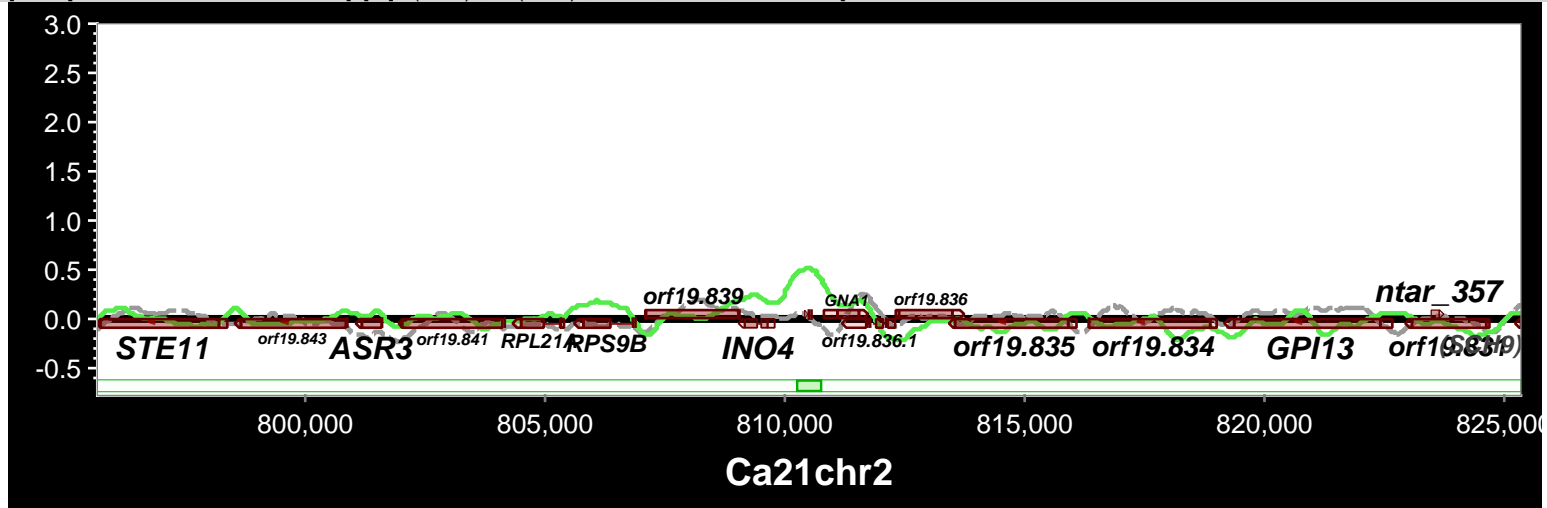

[0.517] Ca21chr4:992201-1021884 [+] [tQ(UUG)4, tQ(UUG)5, orf19.3813, SSZ1, GYP1]

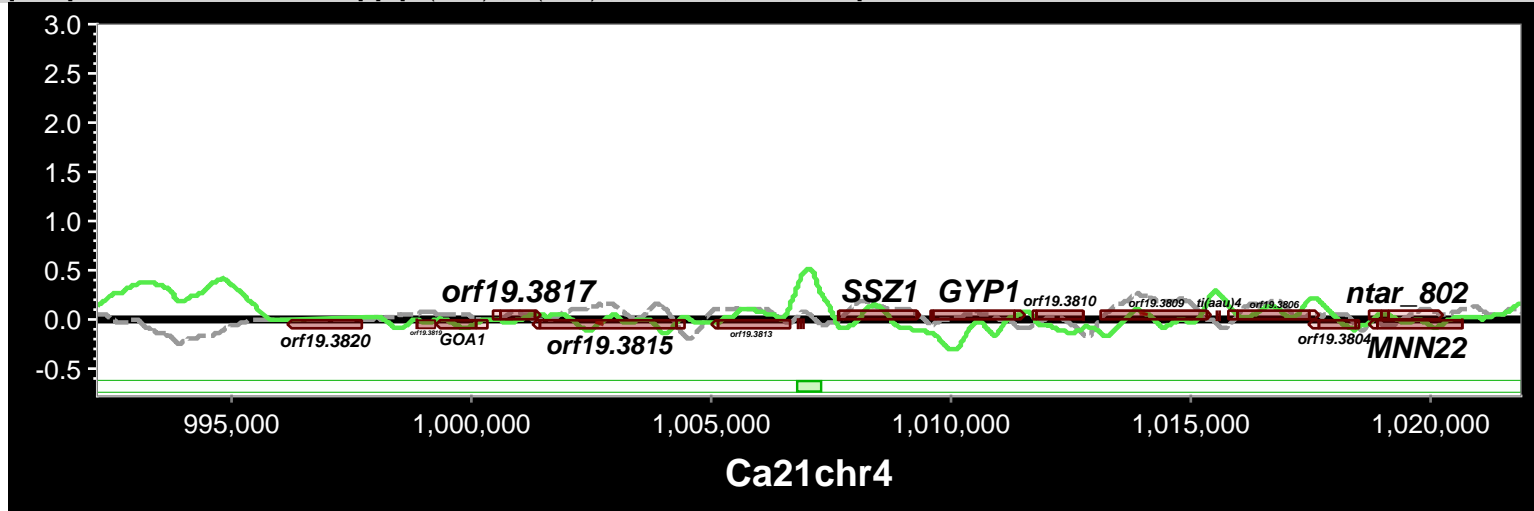

[0.513] Ca21chr2:1-29684 [+] [orf19.1910, PGA52, orf19.1913, FAV3, EMC9]

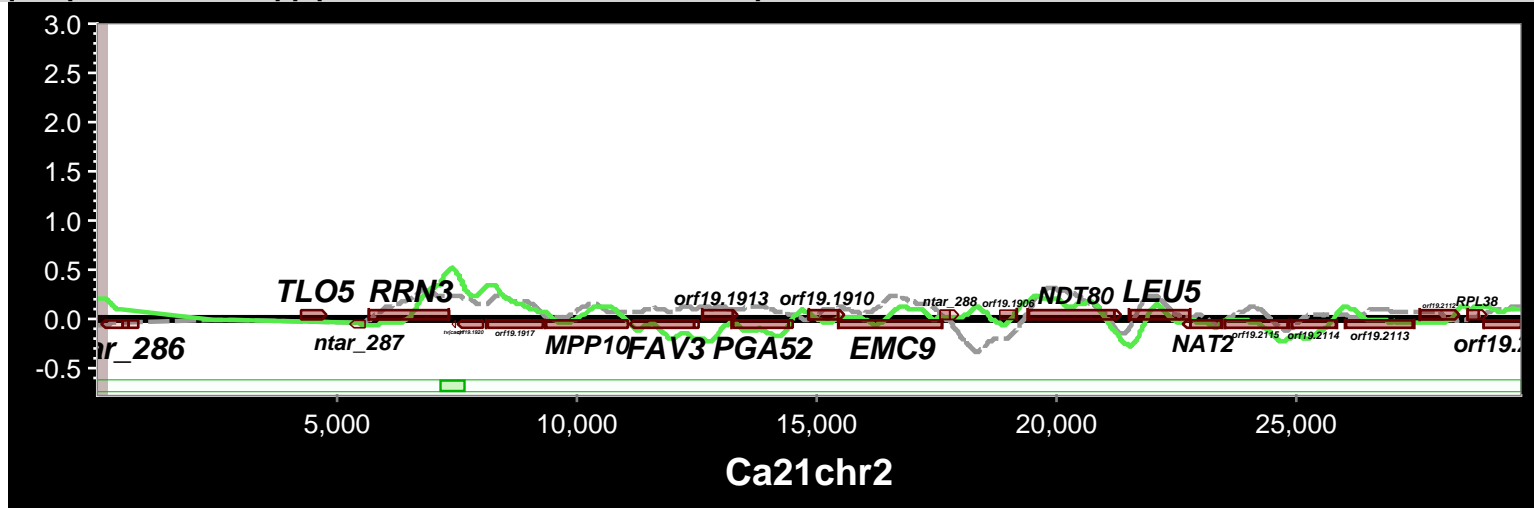

[0.513] Ca21chr6:732533-762216 [+] [orf19.5717, SAP4, orf19.5718, SAP1, orf19.5719]

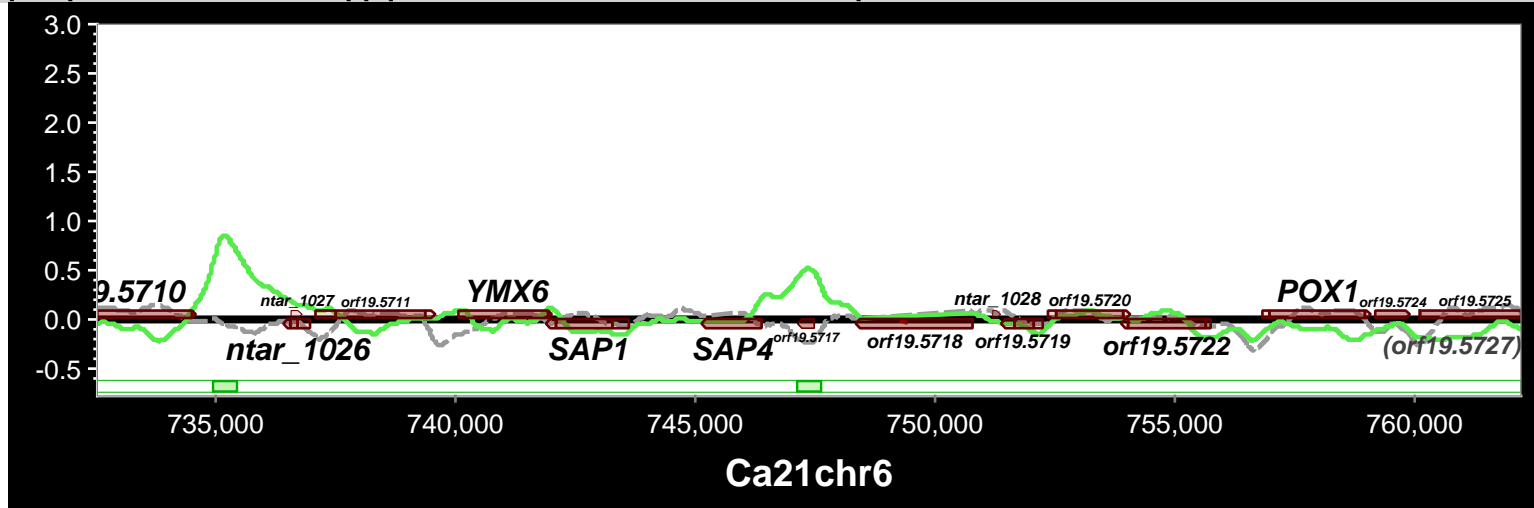

[0.511] Ca21chr4:765114-794797 [+] [tG(GCC)2, tD(GUC)4, tD(GUC)3, tD(GUC)2, SPO75]

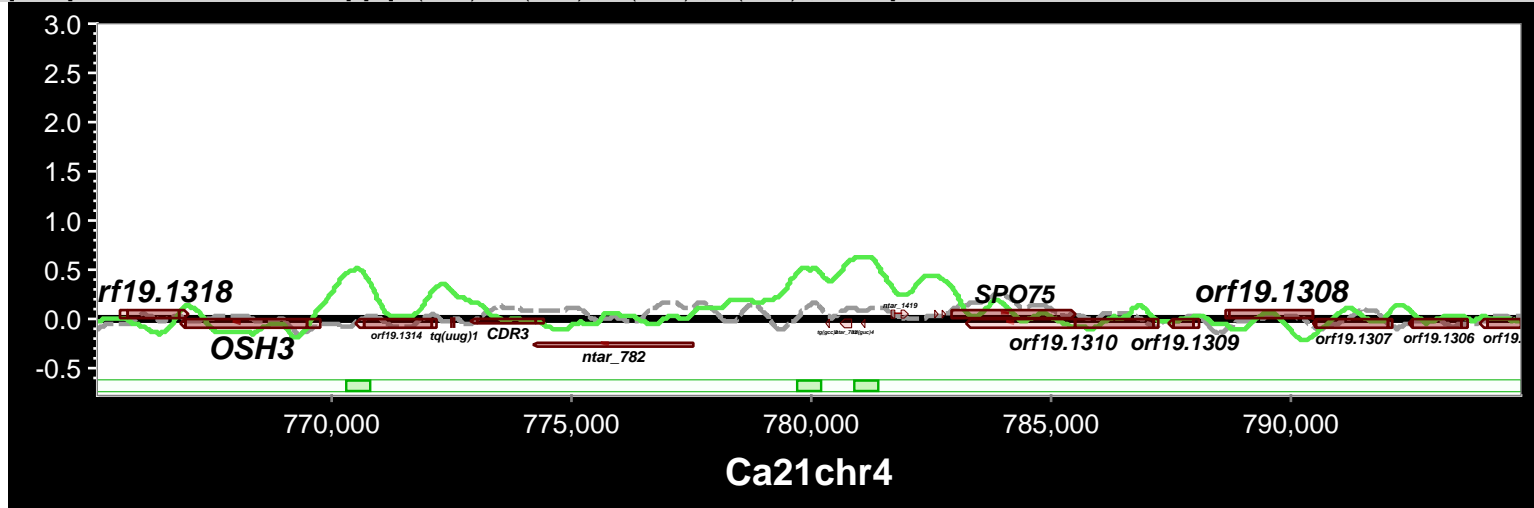

[0.511] Ca21chr4:906750-936433 [+] [FRE10, COX11, orf19.1417, orf19.1414, SEC15]

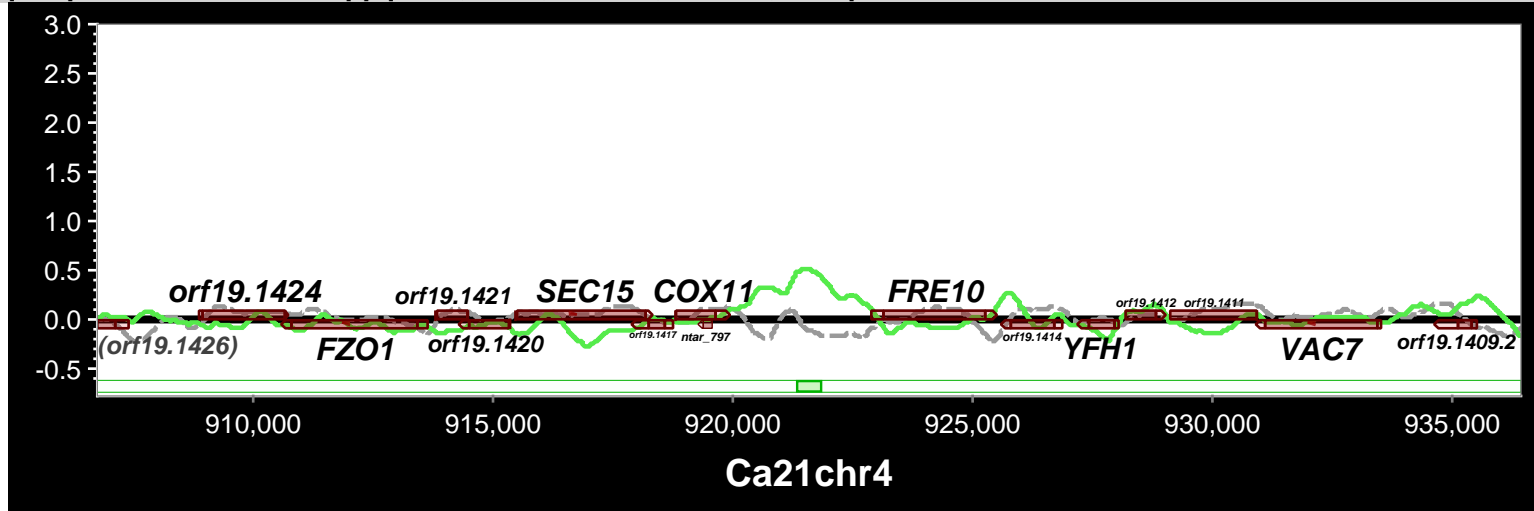

[0.511] Ca21chrR:157803-187486 [+] [tT(AGU)3, orf19.3283, orf19.3284, BMT3, orf19.3285]

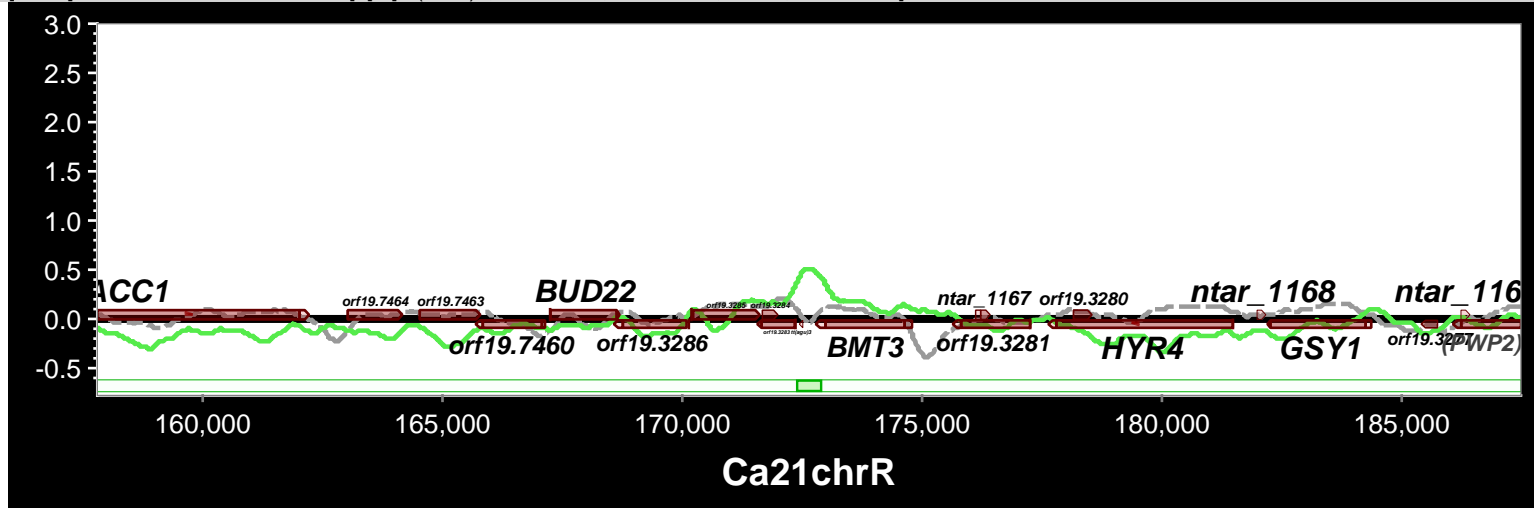

[0.51] Ca21chr1:3058514-3088197 [+] [SIM1, orf19.5033, orf19.5034, SSK1, orf19.5035]

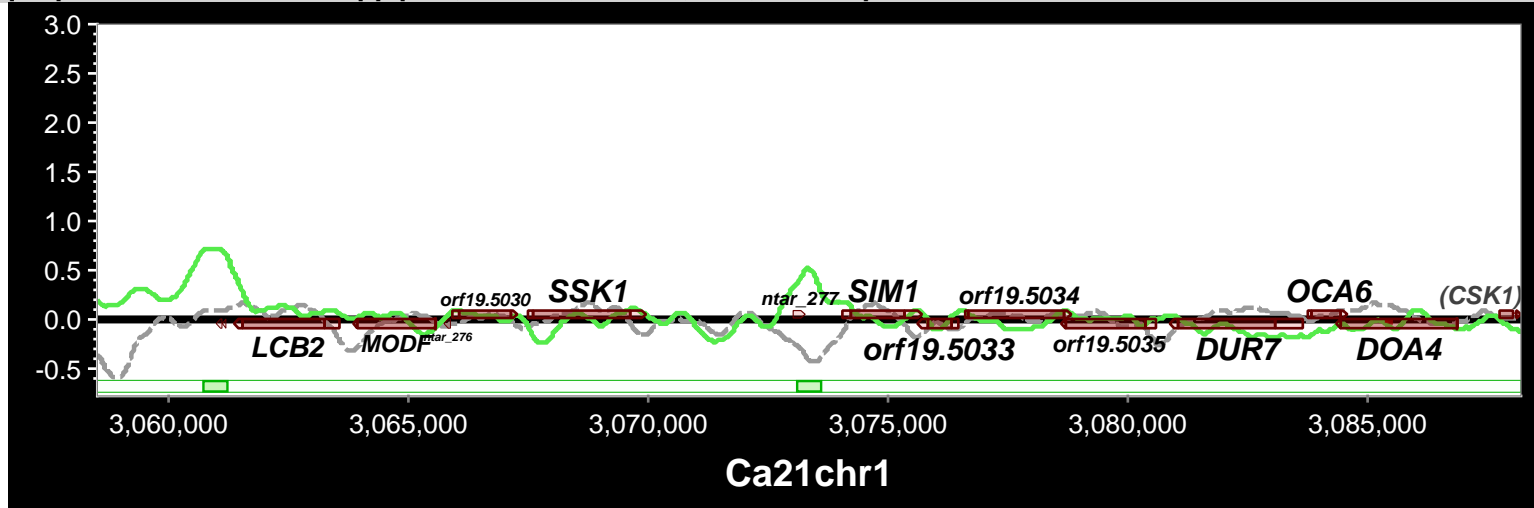

[0.51] Ca21chr1:3095077-3124760 [+] [RBE1, RPL4B, FTR1, orf19.7216, orf19.7215.3]

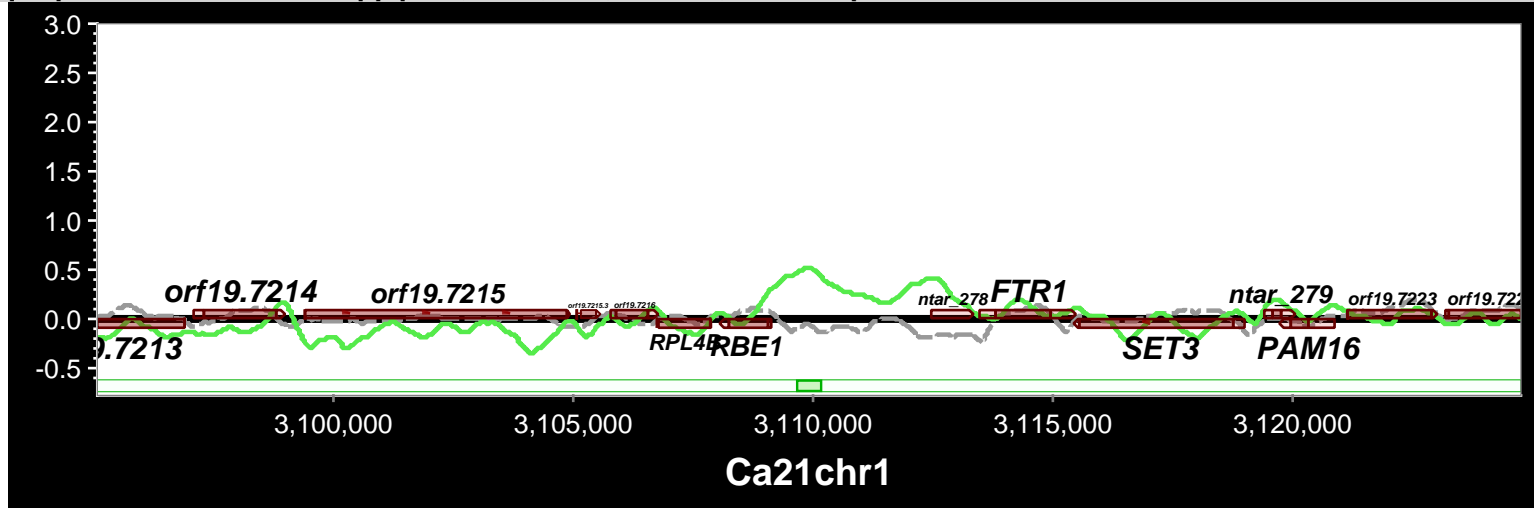

[0.51] Ca21chr4:755712-785395 [+] [OSH3, orf19.1314, tQ(UUG)1, CDR3, orf19.1318]

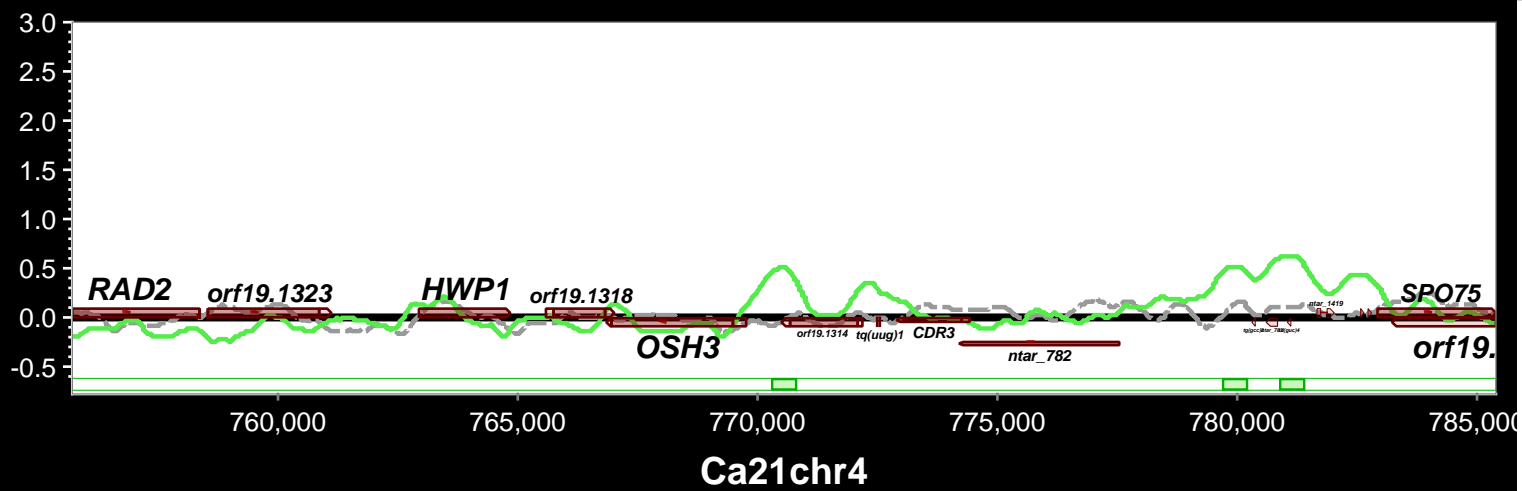

[0.502] Ca21chr7:99408-129091 [+] [orf19.7054, GAC1, orf19.7056, orf19.7052, orf19.7051]

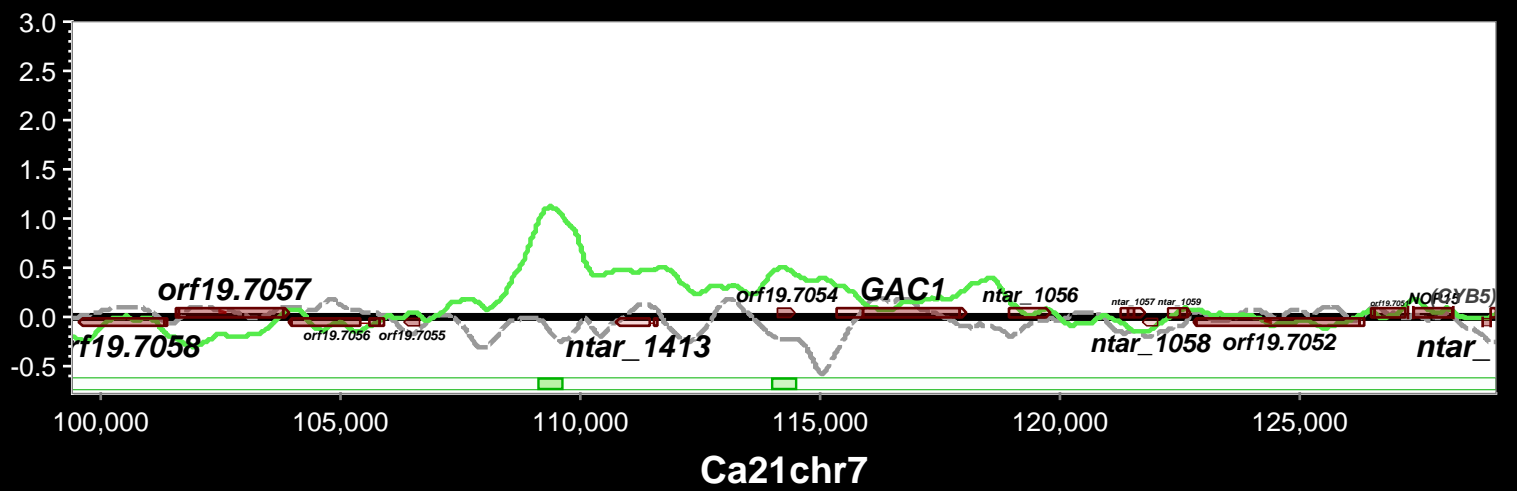

[0.501] Ca21chr3:1591865-1621548 [+] [SSN6, POS5, RPD31, orf19.6802, orf19.6797]

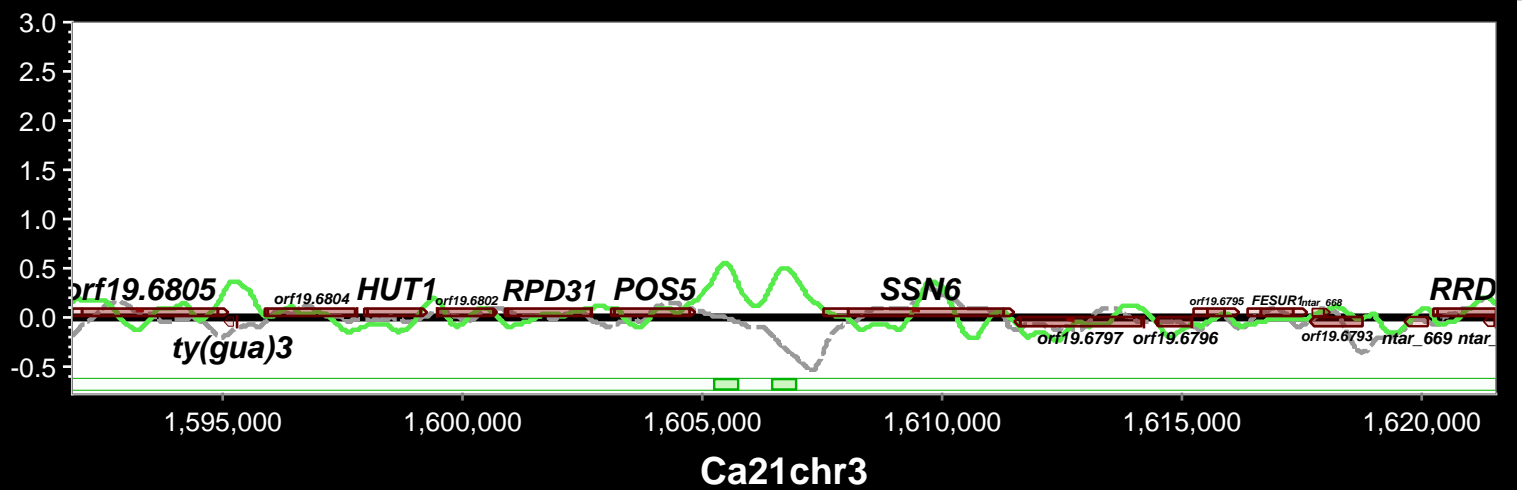

[0.5] Ca21chr1:877943-907626 [+] [SSA2, orf19.1066, GPM2, ACS2, RPN4]

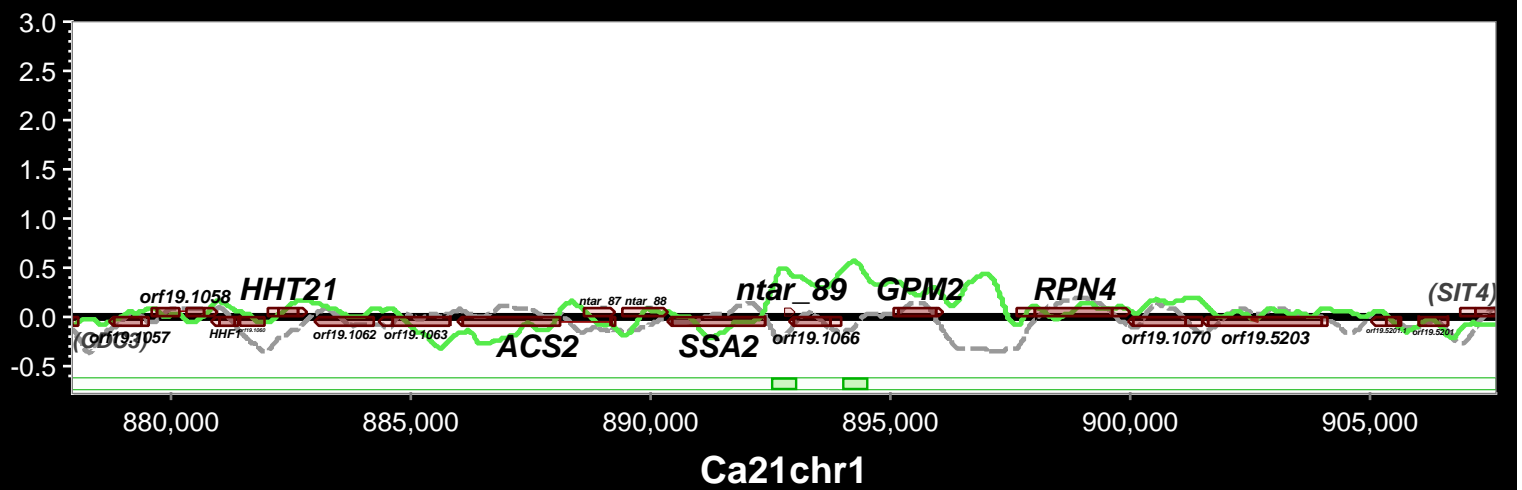

[0.5] Ca21chr1:1508396-1538079 [+] [GAP4, TAF145, orf19.6194, orf19.6195, orf19.4455]

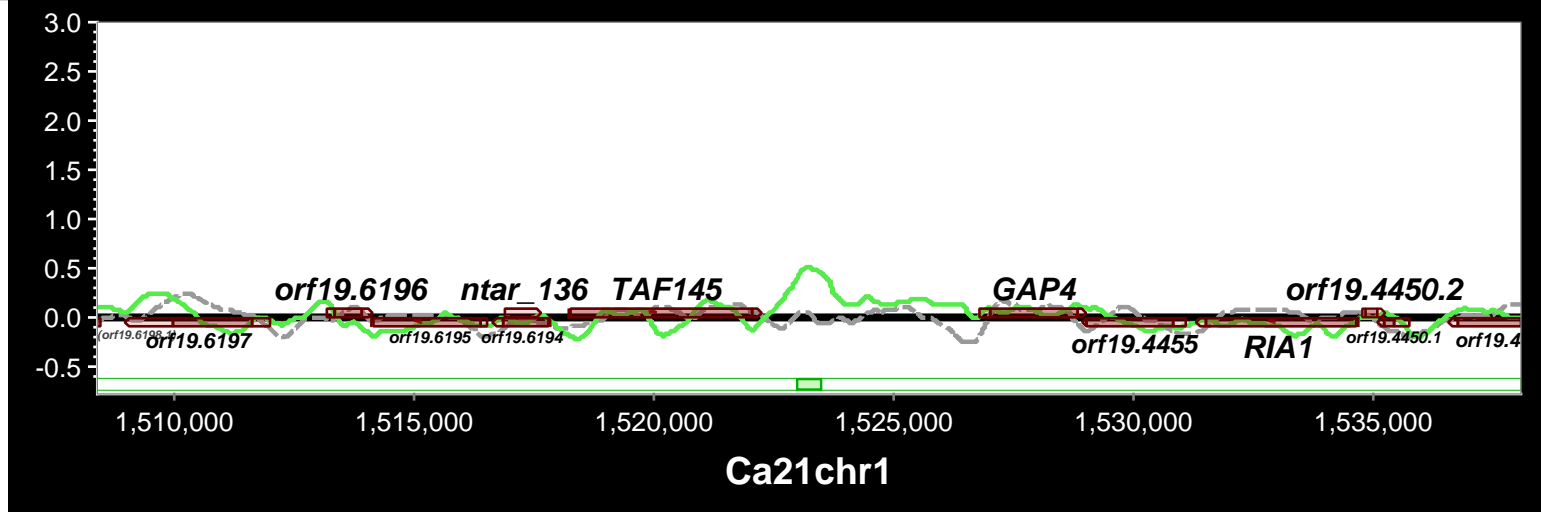

[0.5] Ca21chr3:782313-811996 [+] [PTR2, MEU1, RAD53, orf19.6941, orf19.6934]

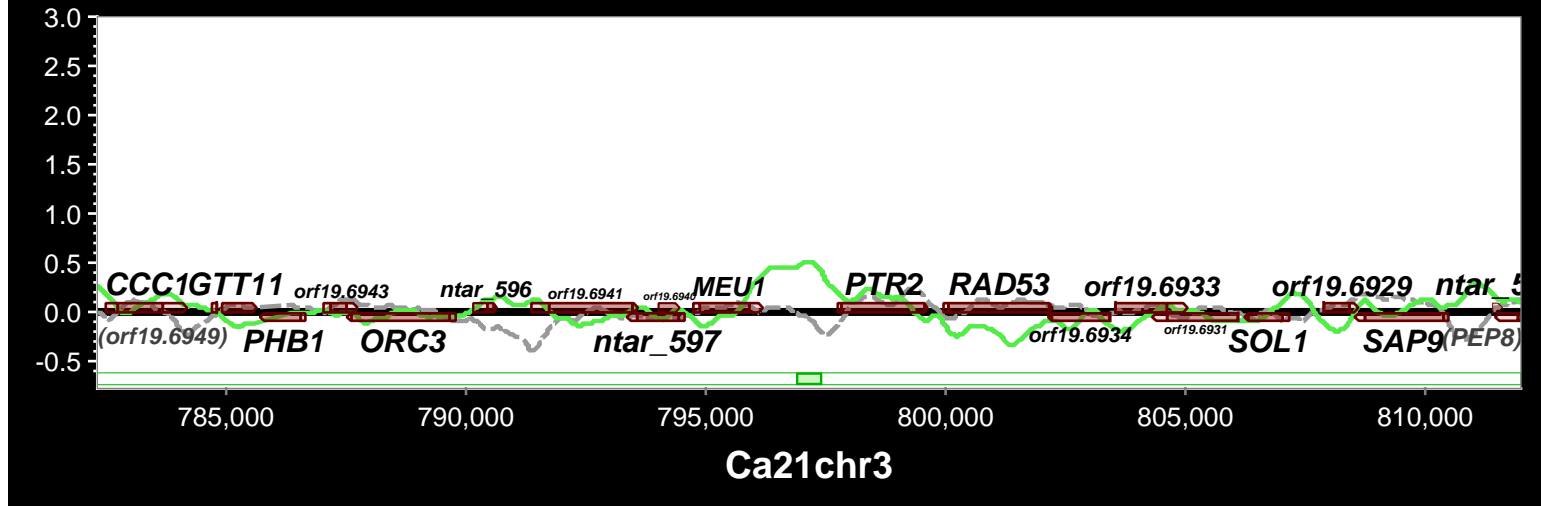

[0.5] Ca21chr5:147865-177548 [+] [IFF8, SPE2, TFB3, RMT2, HYR3]

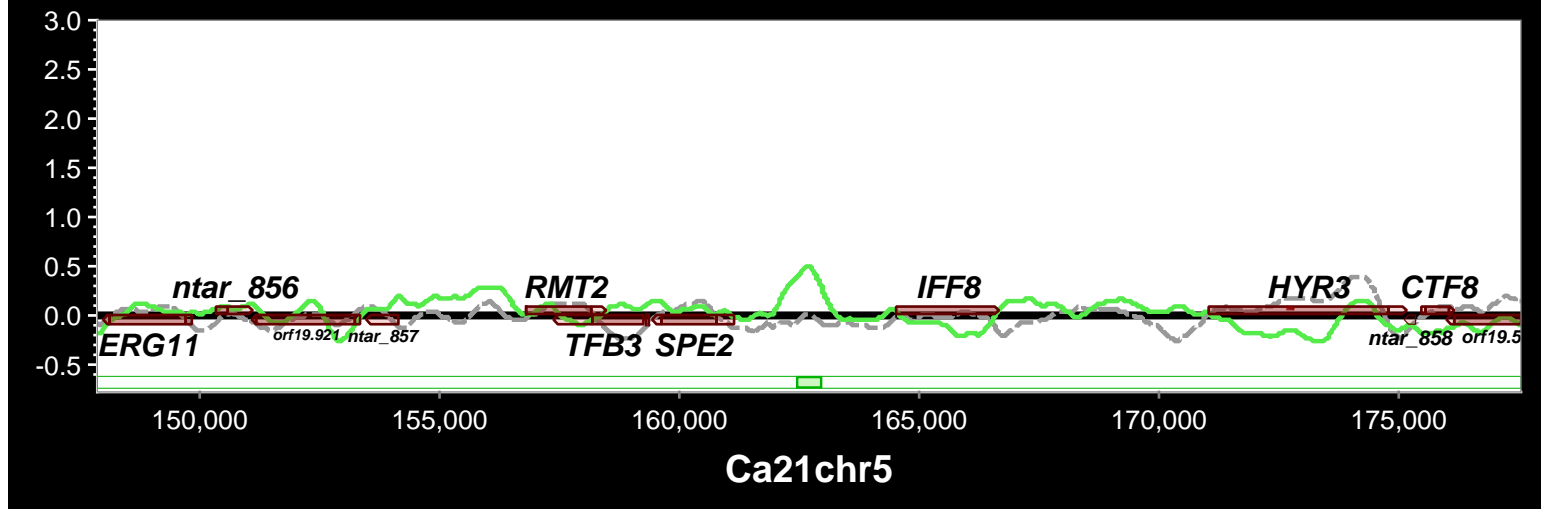

[0.5] Ca21chr5:244679-274362 [+] [CYC3, orf19.1956, orf19.1959, orf19.1955, PUS4]

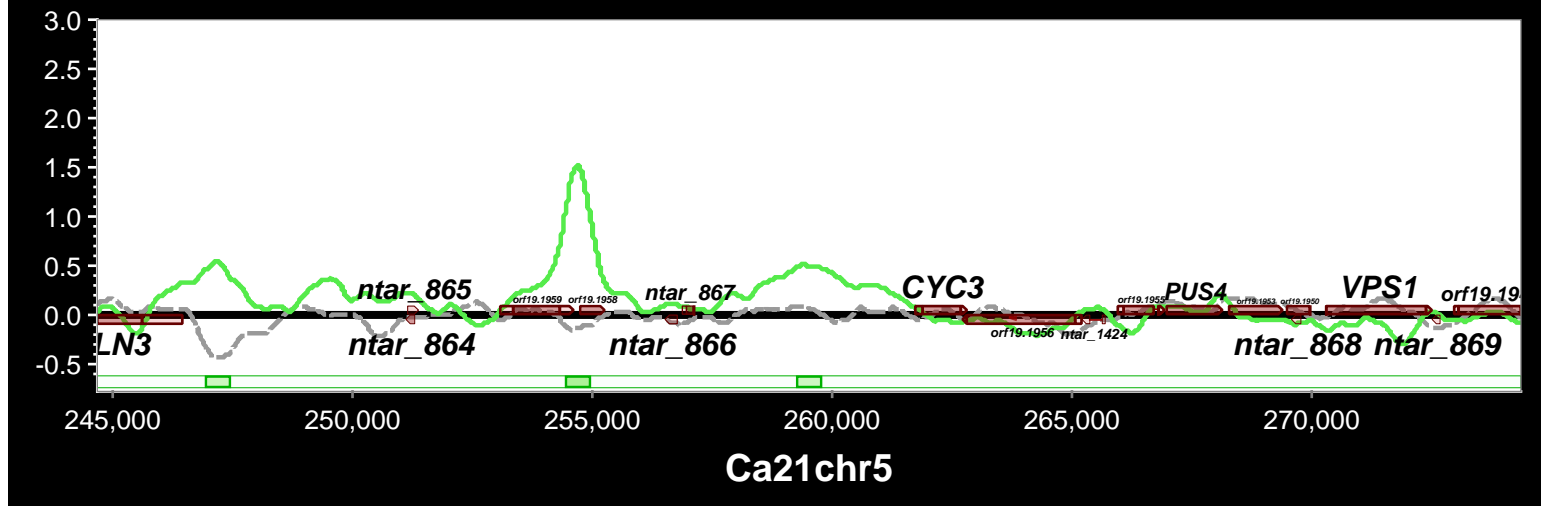

[0.49] Ca21chr1:2461695-2491378 [+] [orf19.674, orf19.675, orf19.673, orf19.675.1, orf19.676]

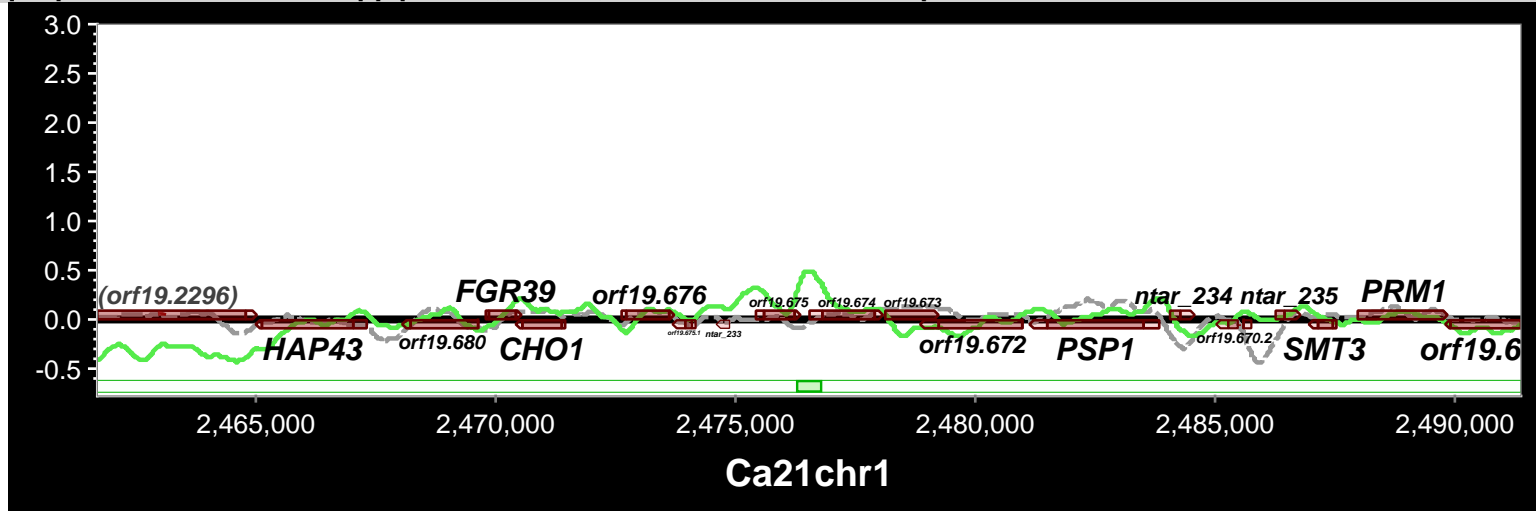

[0.49] Ca21chr3:1143527-1173210 [+] [orf19.6003, HGT5, orf19.6007, RPL8B, SAP3]

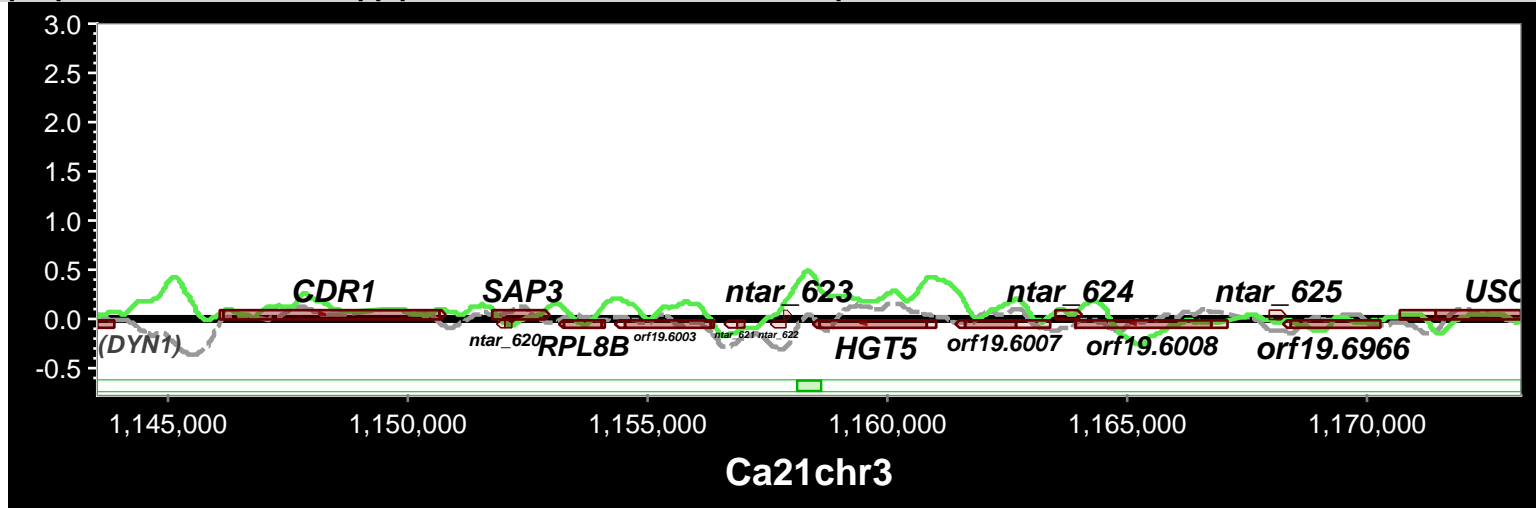

[0.49] Ca21chr4:855292-884975 [+] [orf19.5304, RHD3, PGA30, PGA31, JEN2]

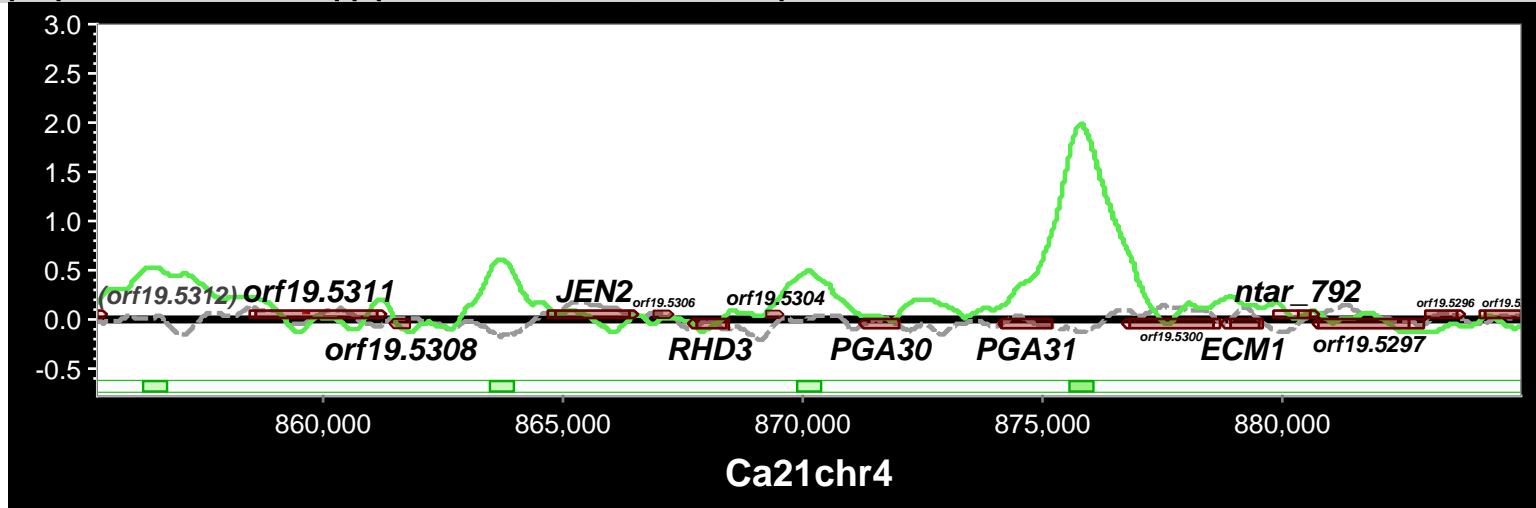

[0.49] Ca21chr5:287925-317608 [+] [CFL4, orf19.1933, orf19.1934, CFL5, orf19.1935]

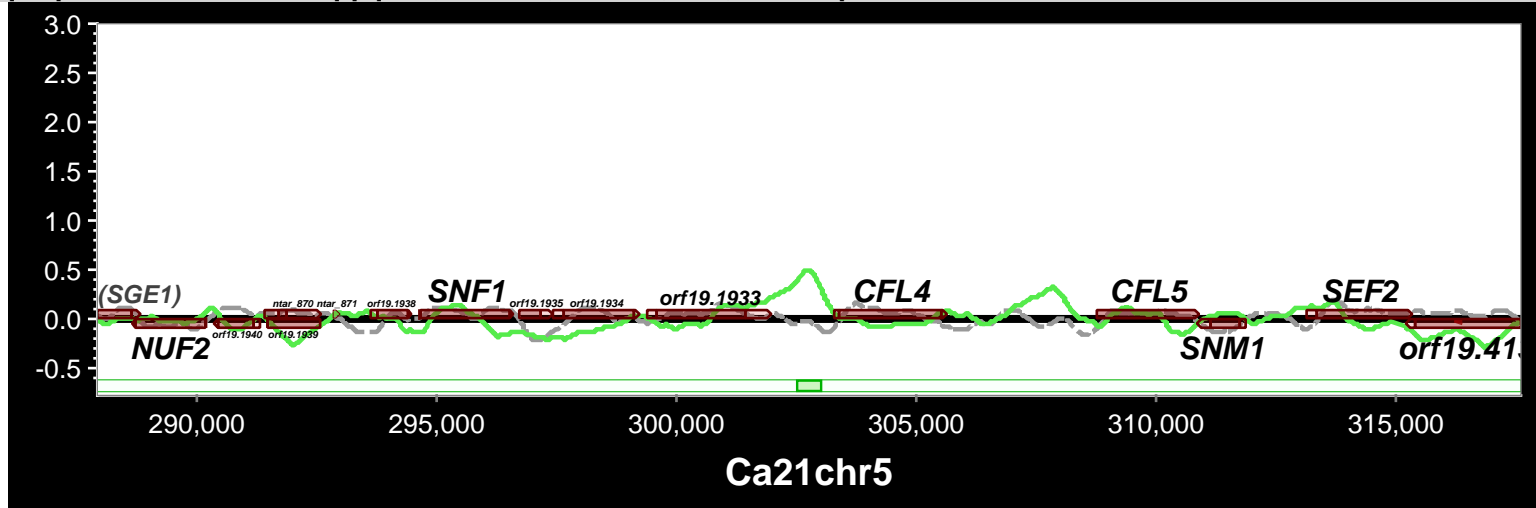



[0.49] Ca21chrR:1248084-1277767 [+] [SFL1, SOK1, orf19.457, orf19.458, orf19.458.1]

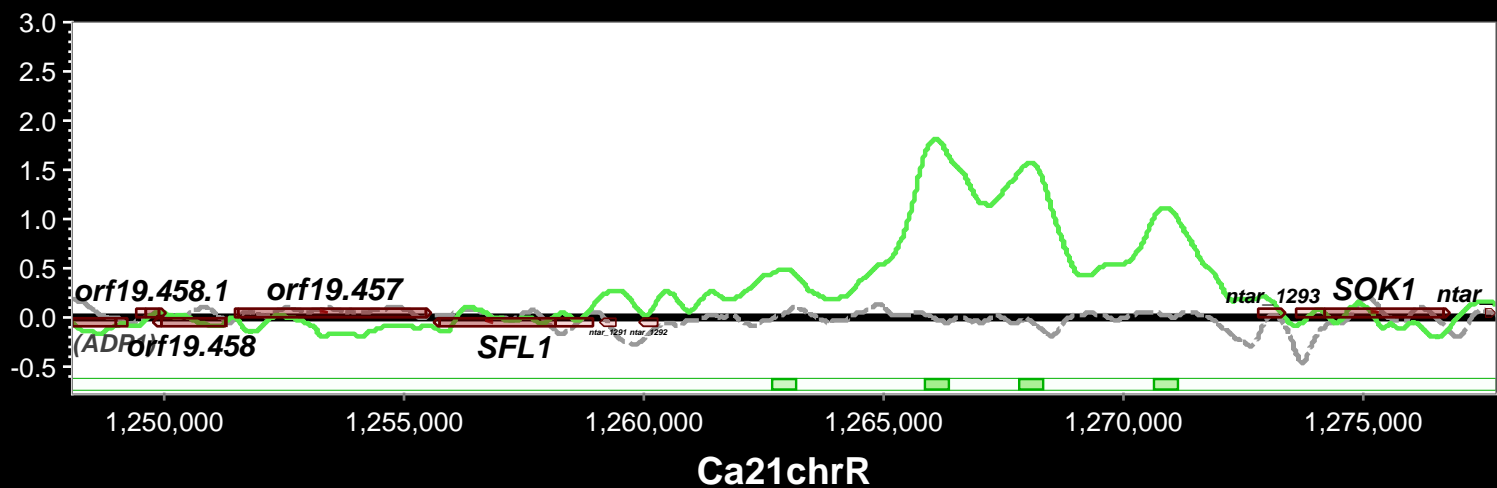

[0.481] Ca21chr3:393390-423073 [+] [tV(AAC)2, orf19.1662, MNT2, DBP5, tK(UUU)1]

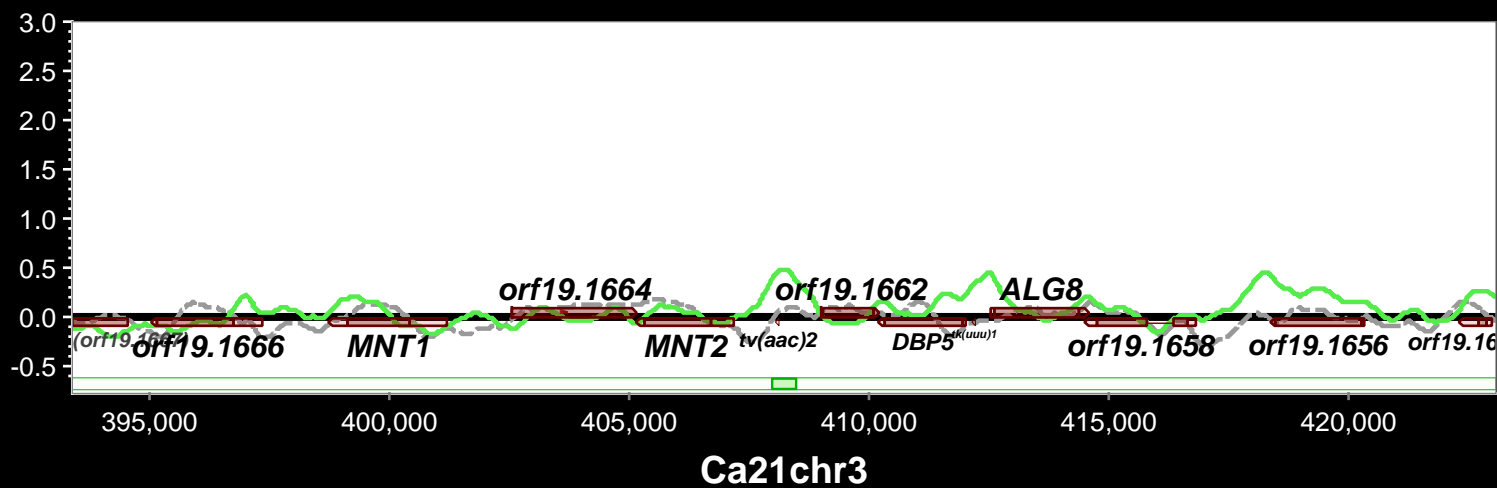

[0.481] Ca21chr5:205136-234819 [+] [tQ(CUG)1, orf19.1970, orf19.1971, CCW14, tE(UUC)3]

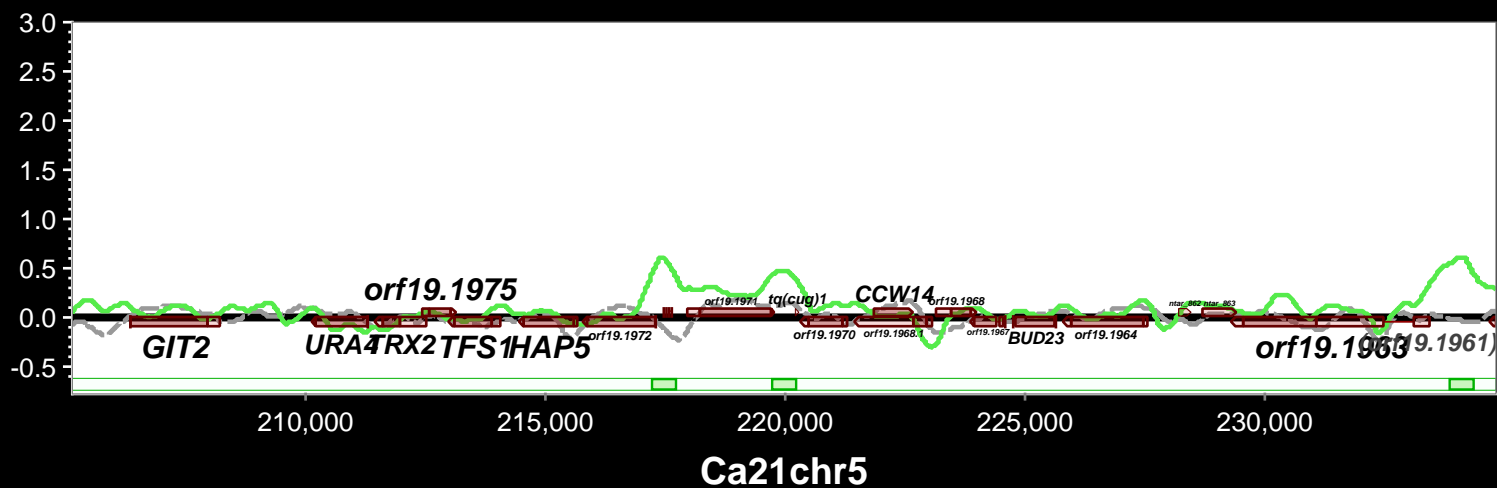

[0.48] Ca21chr1:2179110-2208793 [+] [SWE1, SFU1, DBP3, ERO1, orf19.4872]

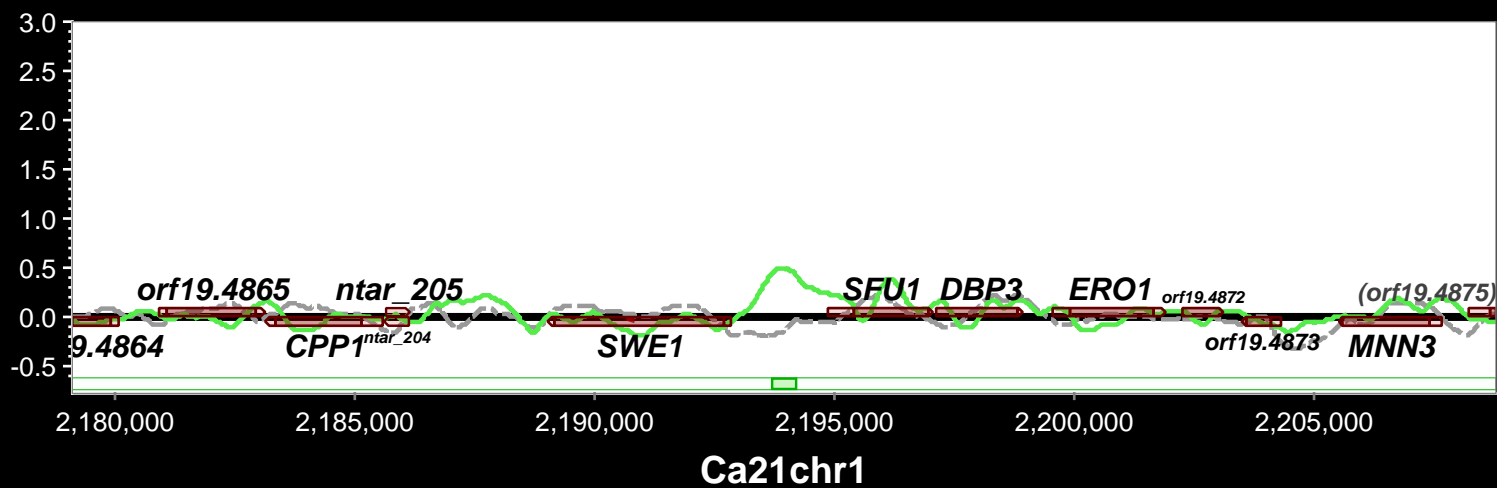

[0.48] Ca21chr2:770143-799826 [+] [orf19.849, orf19.850, tR(UCU)2, tF(GAA)2, orf19.851]

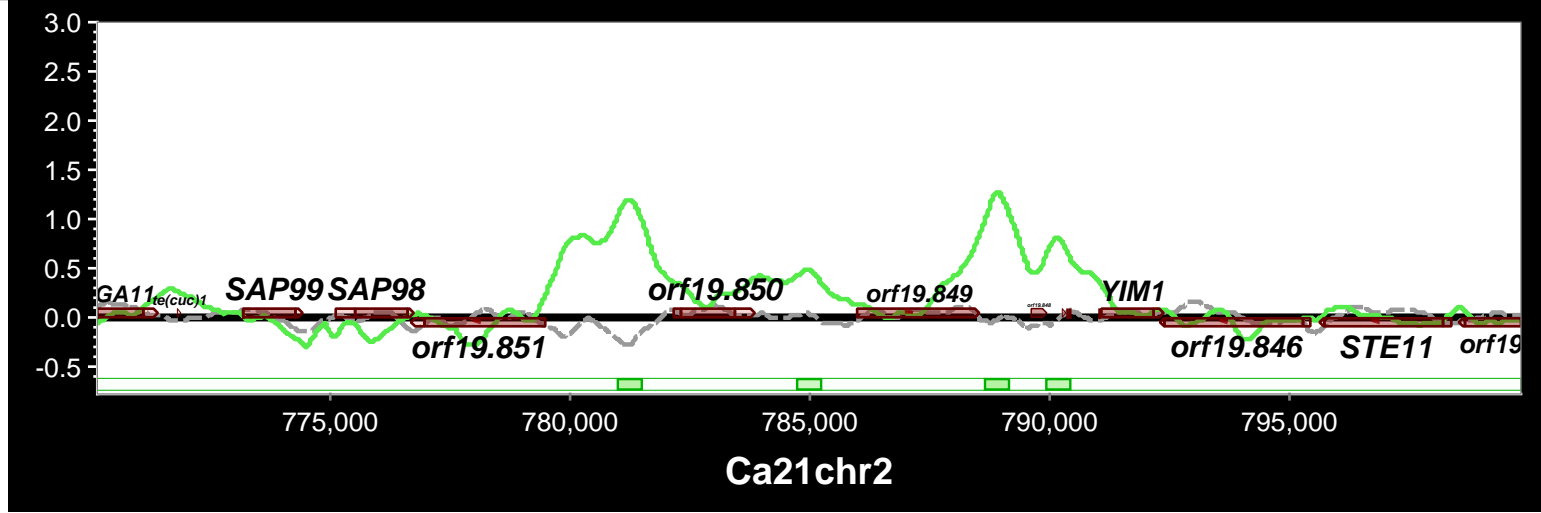

[0.48] Ca21chr2:1912049-1941732 [+] [CEN2, RPL3, orf19.1604, orf19.1600, orf19.1599]

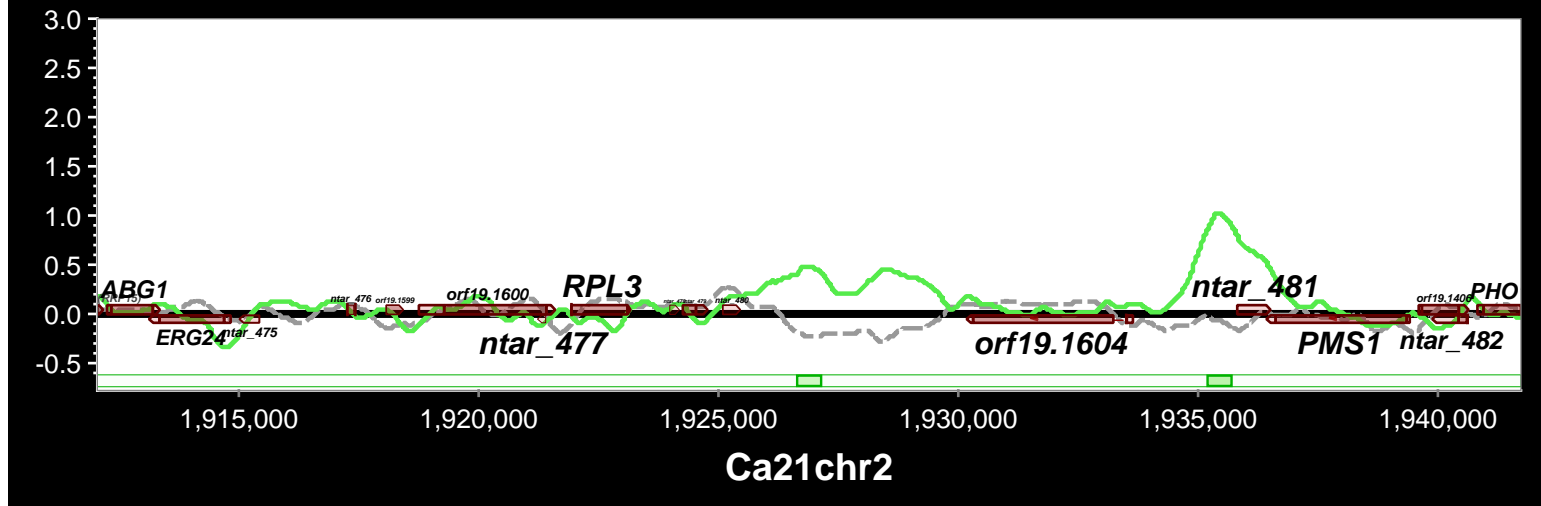

[0.48] Ca21chr3:269170-298853 [+] [orf19.1718, SGA1, orf19.1717, orf19.1720, URA3]

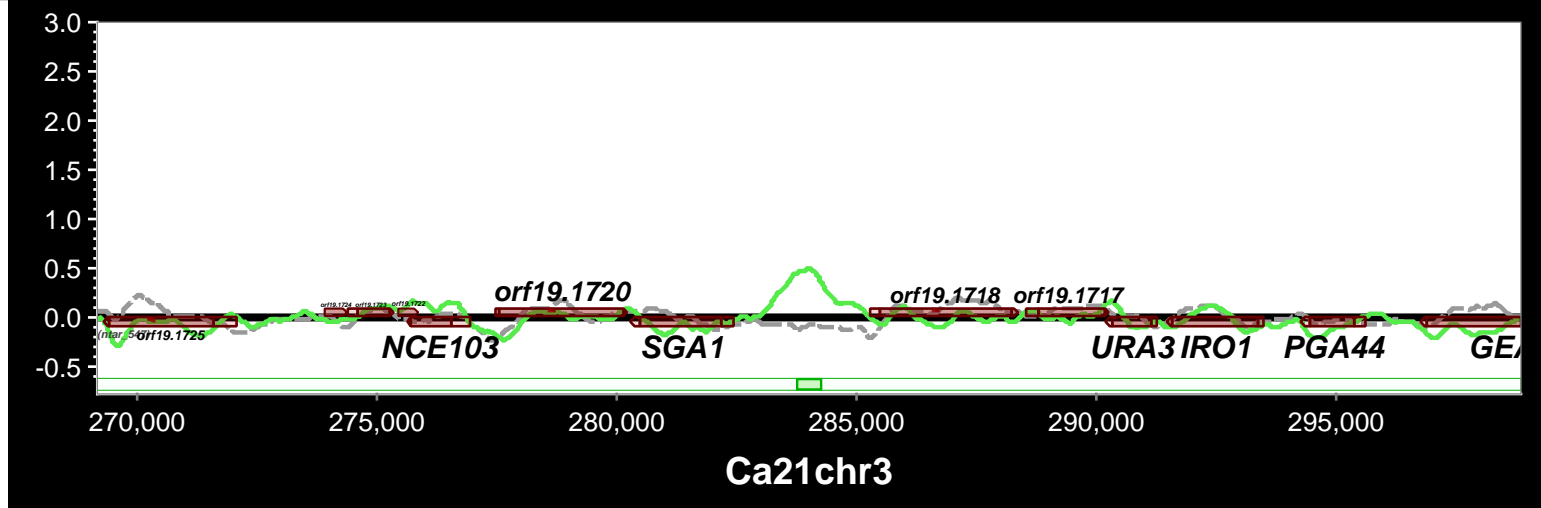

[0.48] Ca21chr3:1631625-1661308 [+] [BMT1, orf19.6783, orf19.6781, MET8, PRO2]

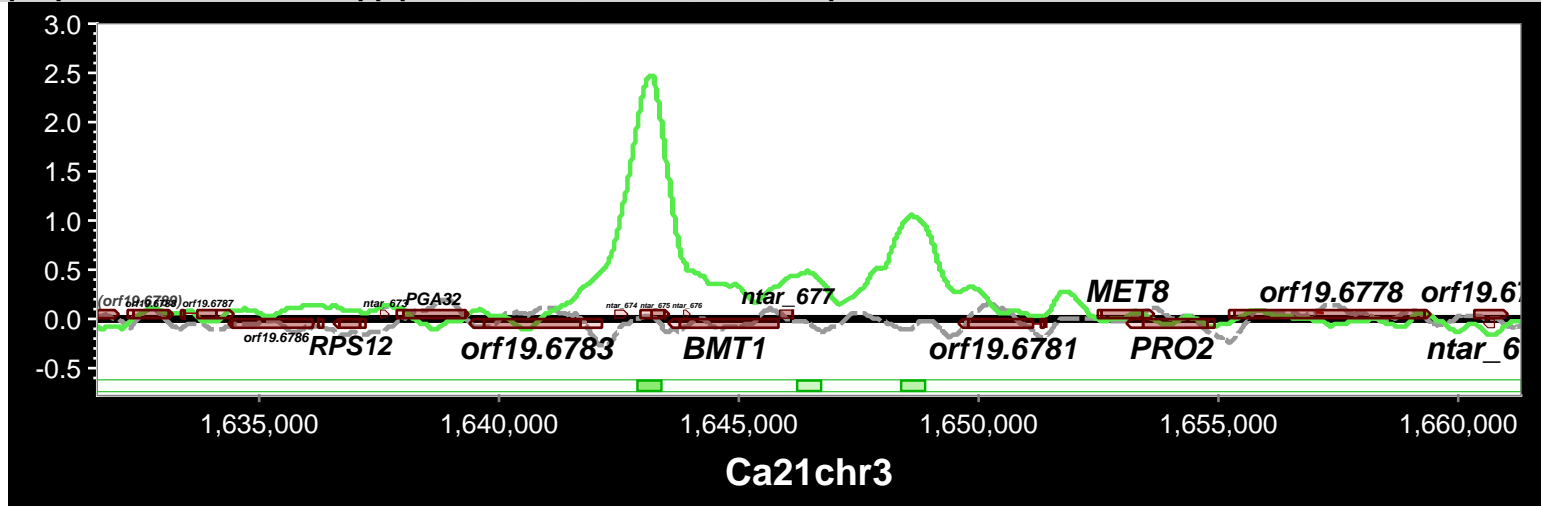

[0.48] Ca21chr5:680134-709817 [+] [orf19.4342, orf19.4341, orf19.4340.1, orf19.4340, VPS4]

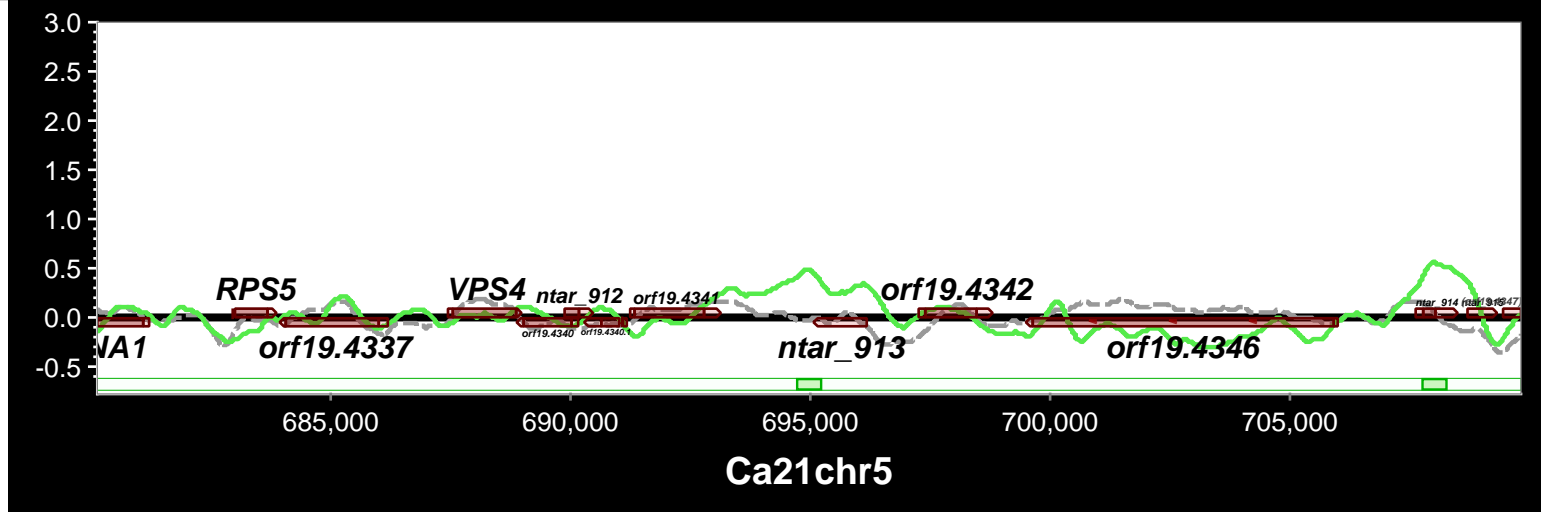

[0.48] Ca21chr6:531397-561080 [+] [orf19.5537, orf19.5536, orf19.5535, orf19.5539, orf19.5534]

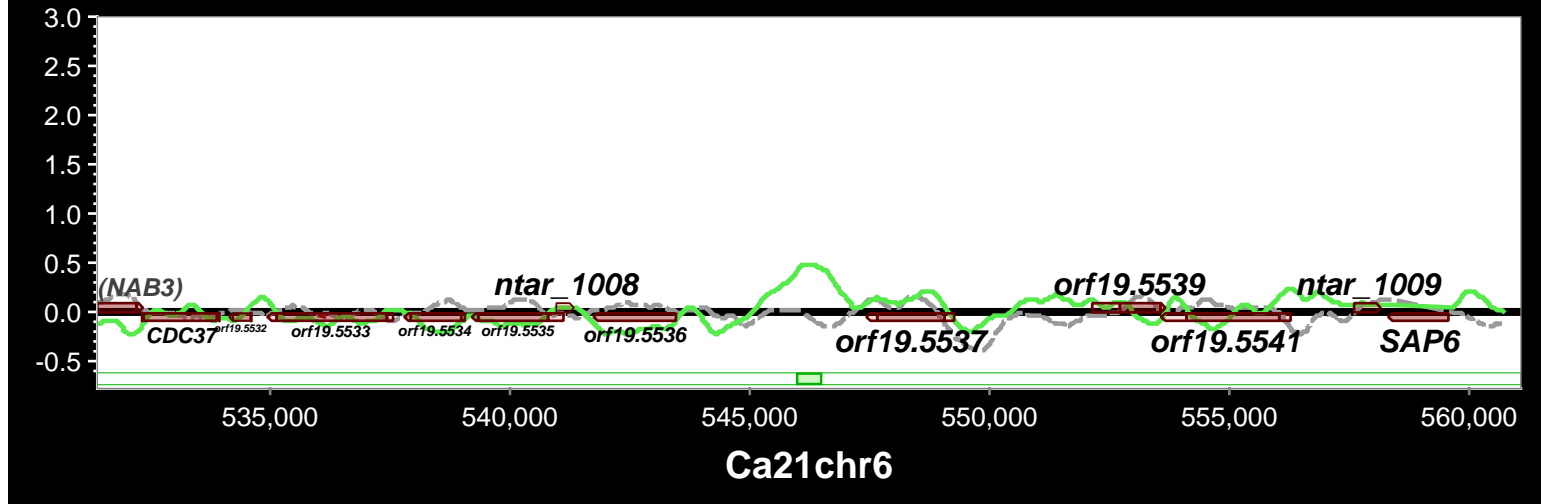

[0.48] Ca21chr6:567564-597247 [+] [orf19.5556, MNN4-4, orf19.5555, RBF1, orf19.5553]

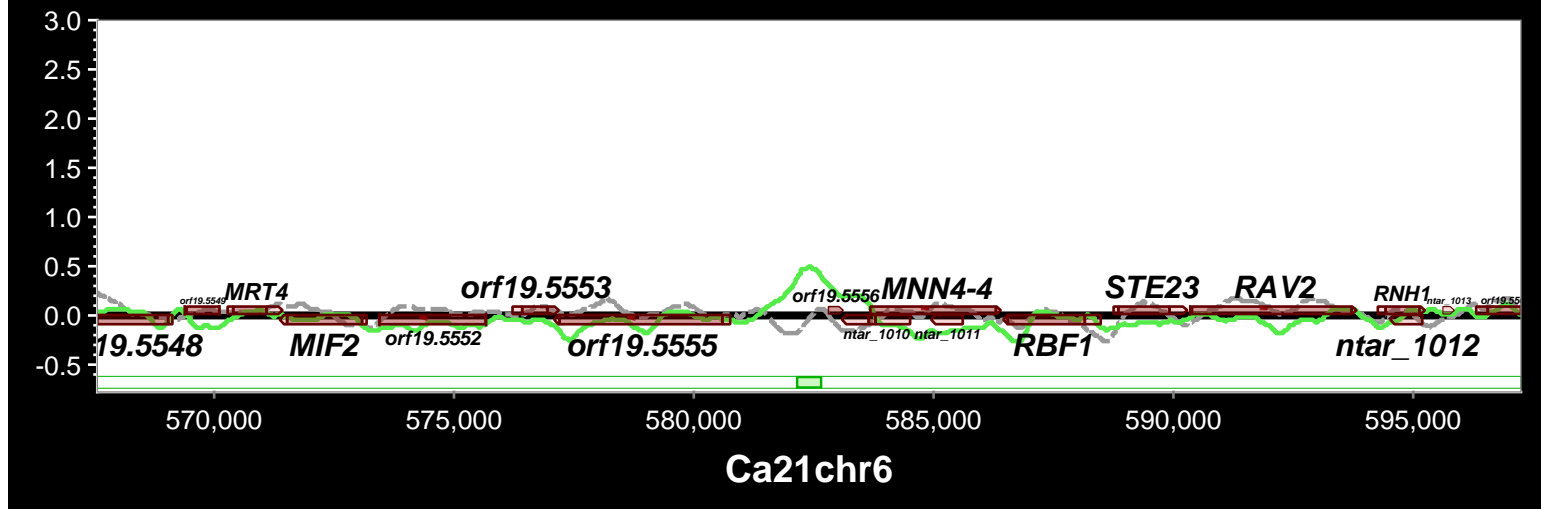

[0.48] Ca21chrR:1867992-1897675 [+] [tG(GCC)6, tE(UUC)7, orf19.6449, orf19.6448, ARF1]

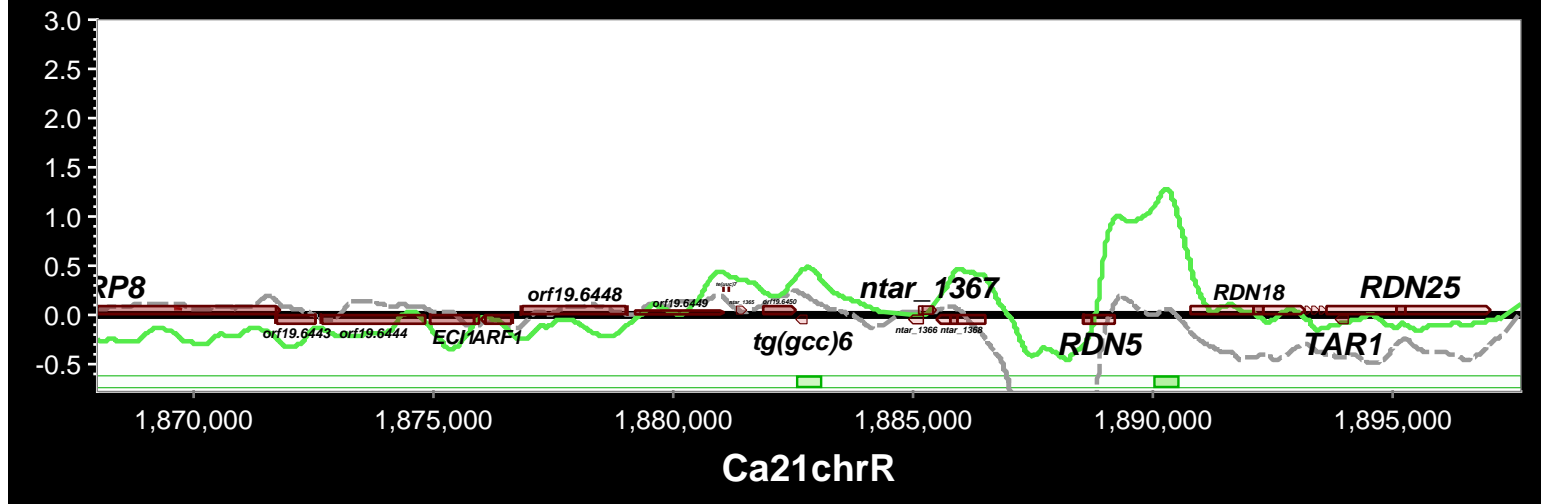

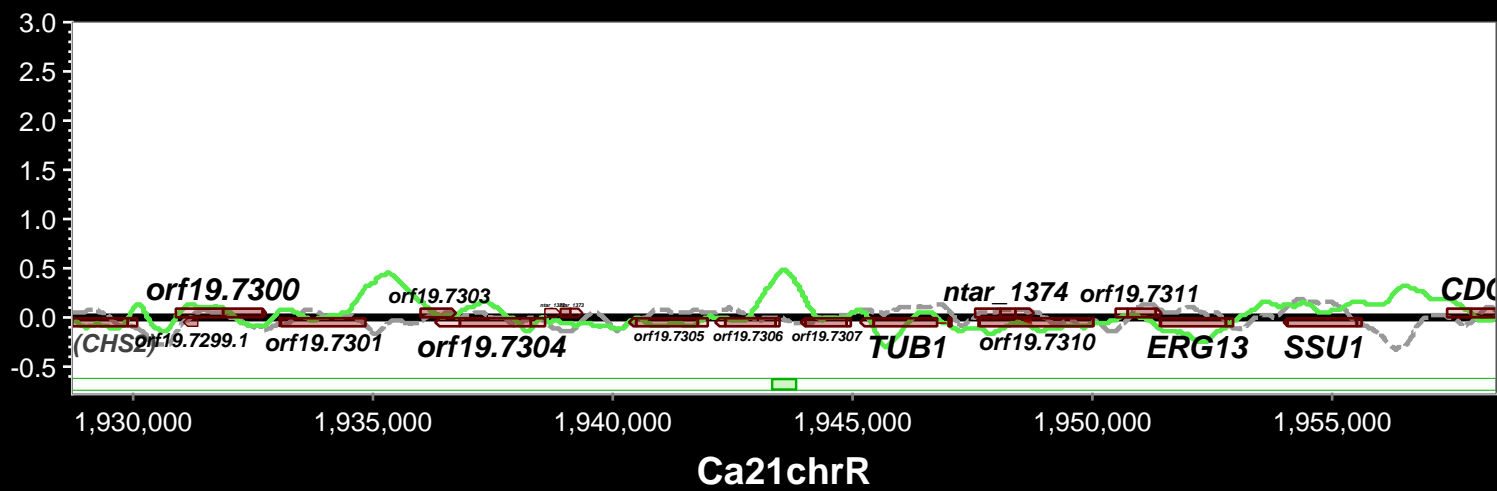

Supplement: NIHMS346589-supplement-05.pdf [file NIHMS346589-supplement-05.pdf]
