# Supplementary material
Source: PubMed Central journal article supplement (PMC3266547)

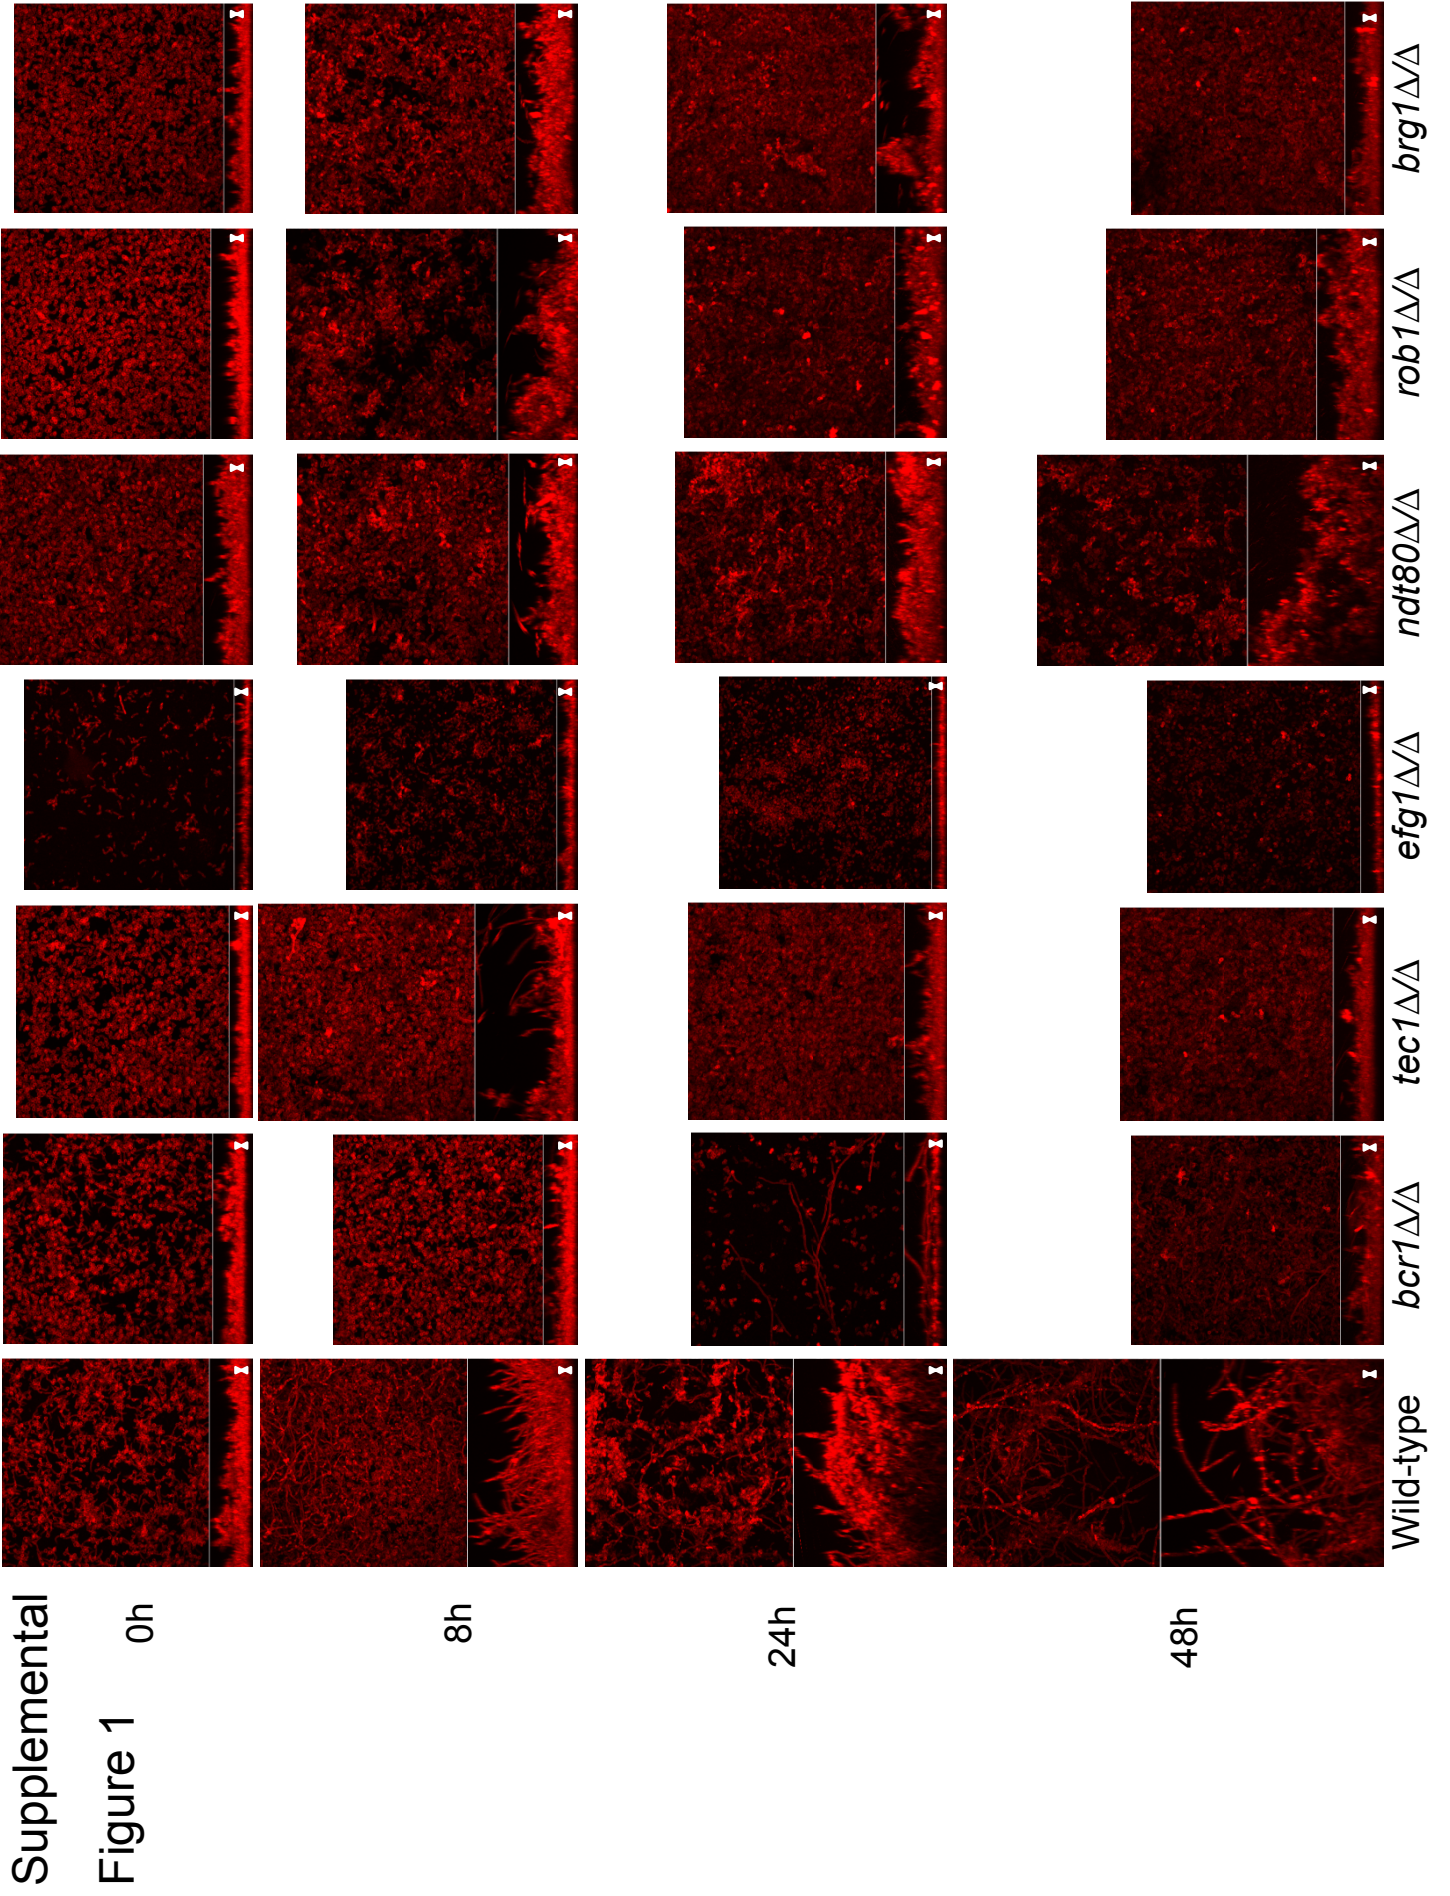

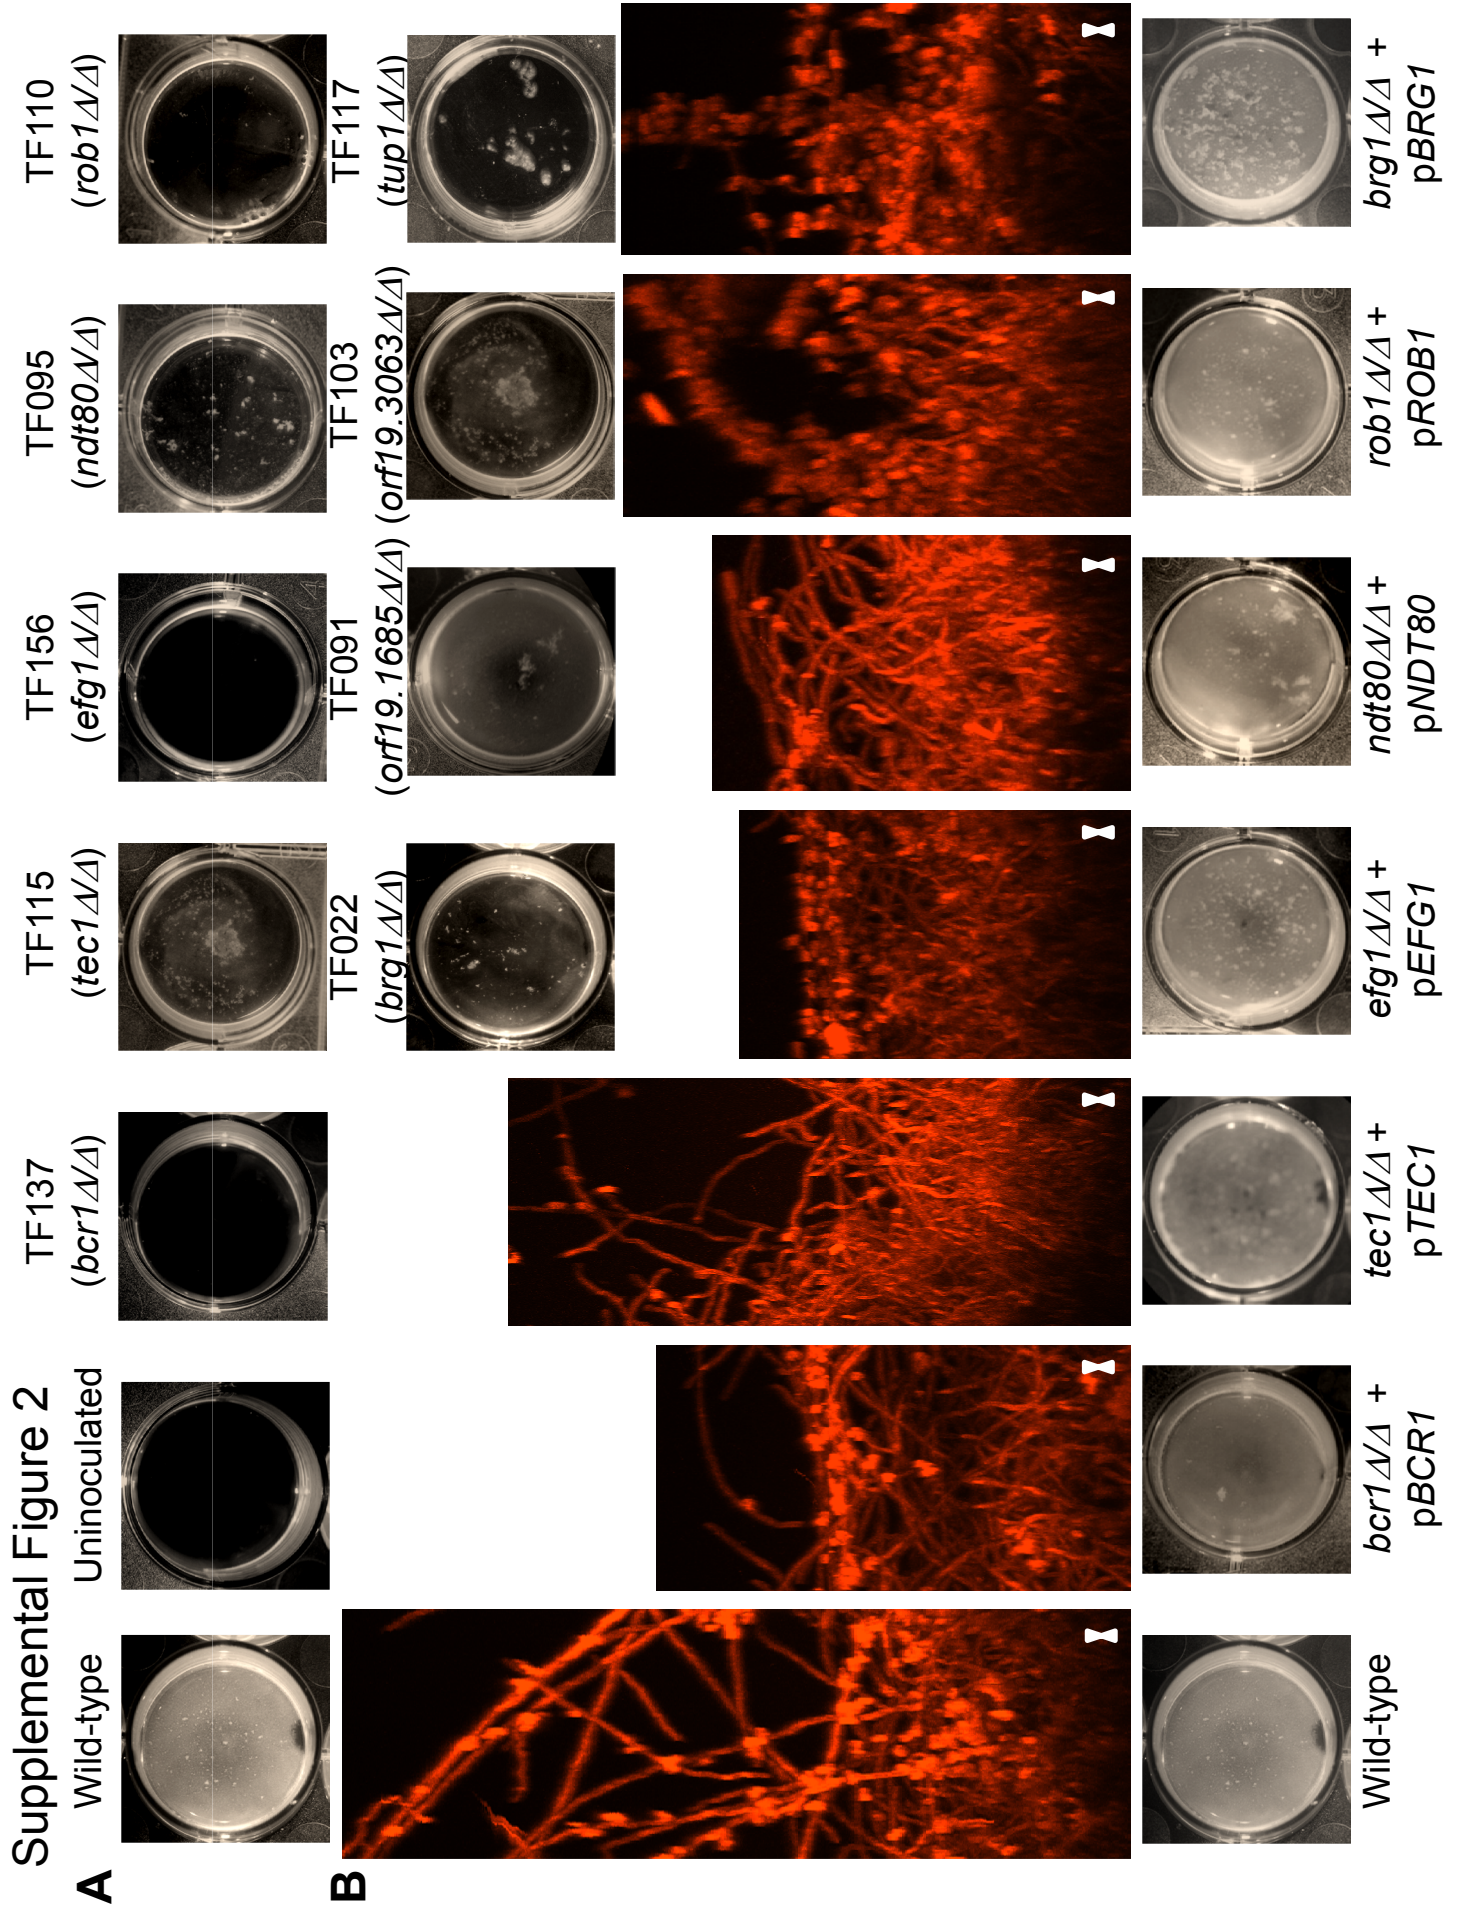

## Supplemental Figure 3

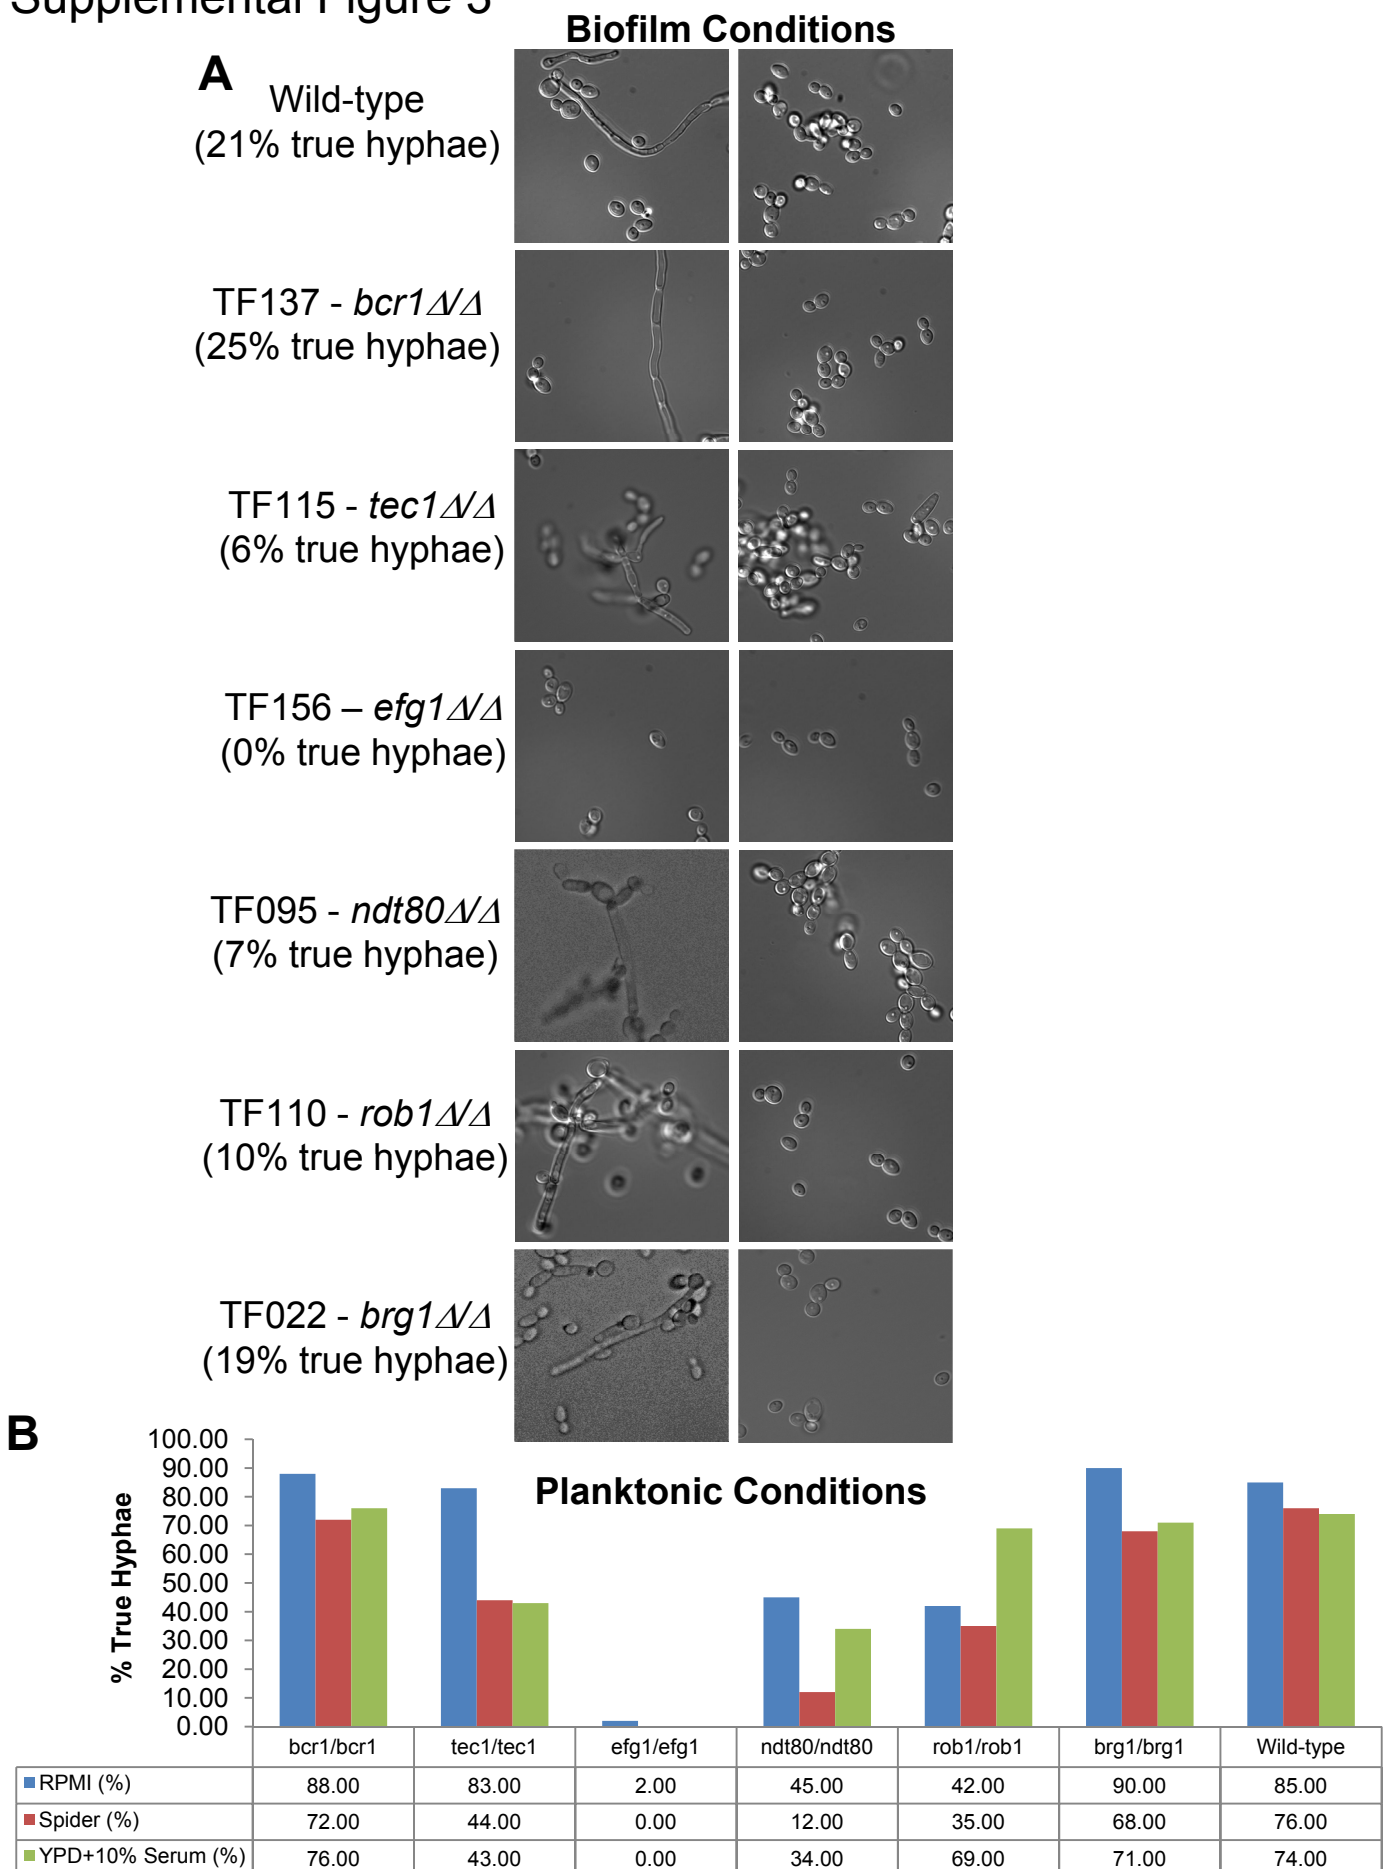

## Supplemental Figure 4

### A. SEM Images of Catheters at 50X

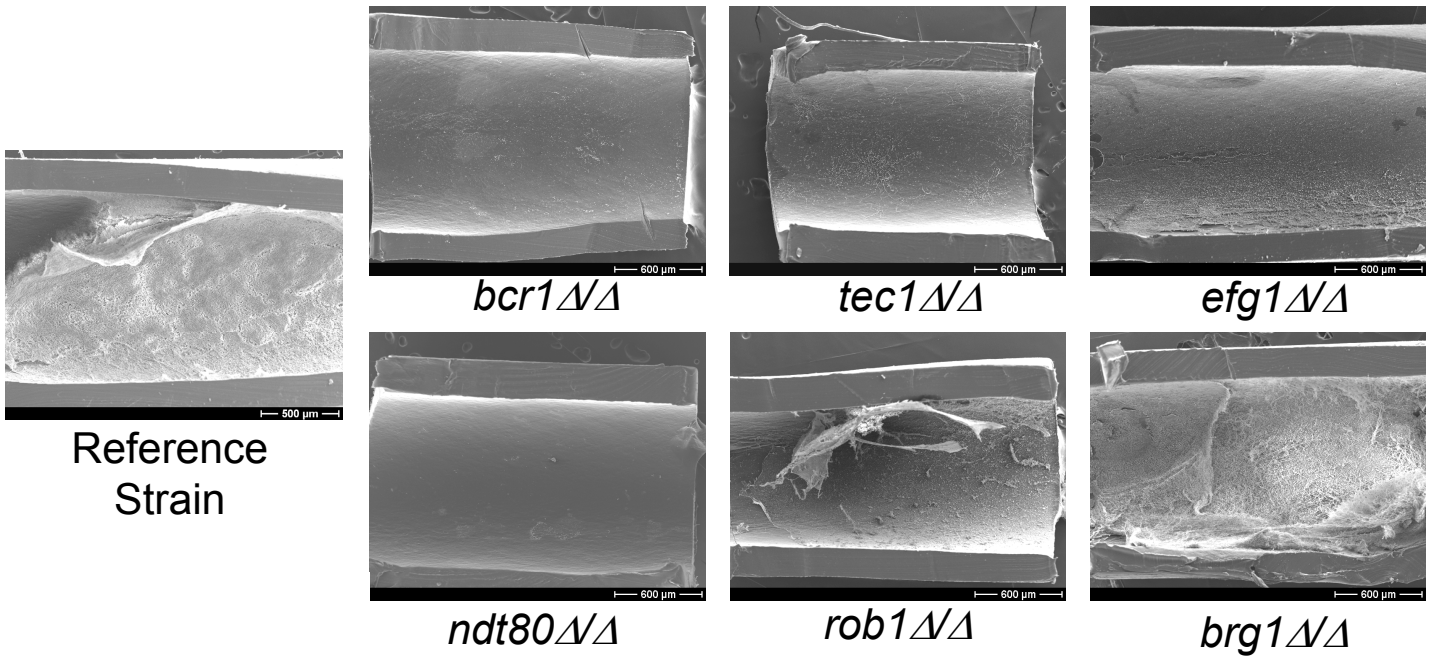

### B. SEM Images of Dentures Containing Extensive Bacterial Biofilms

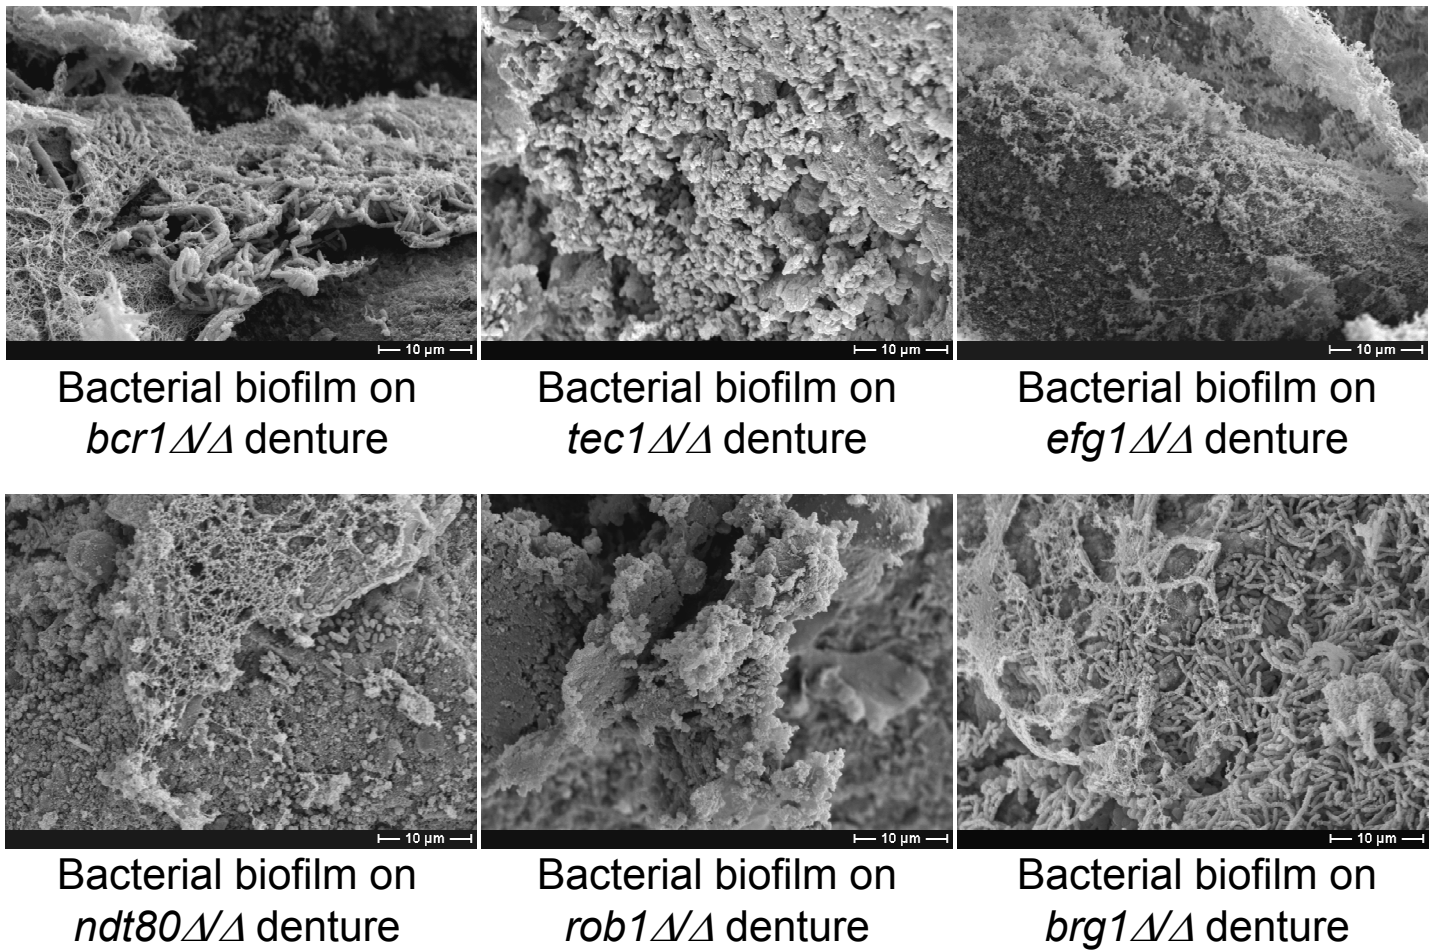

Supplemental Figure 5

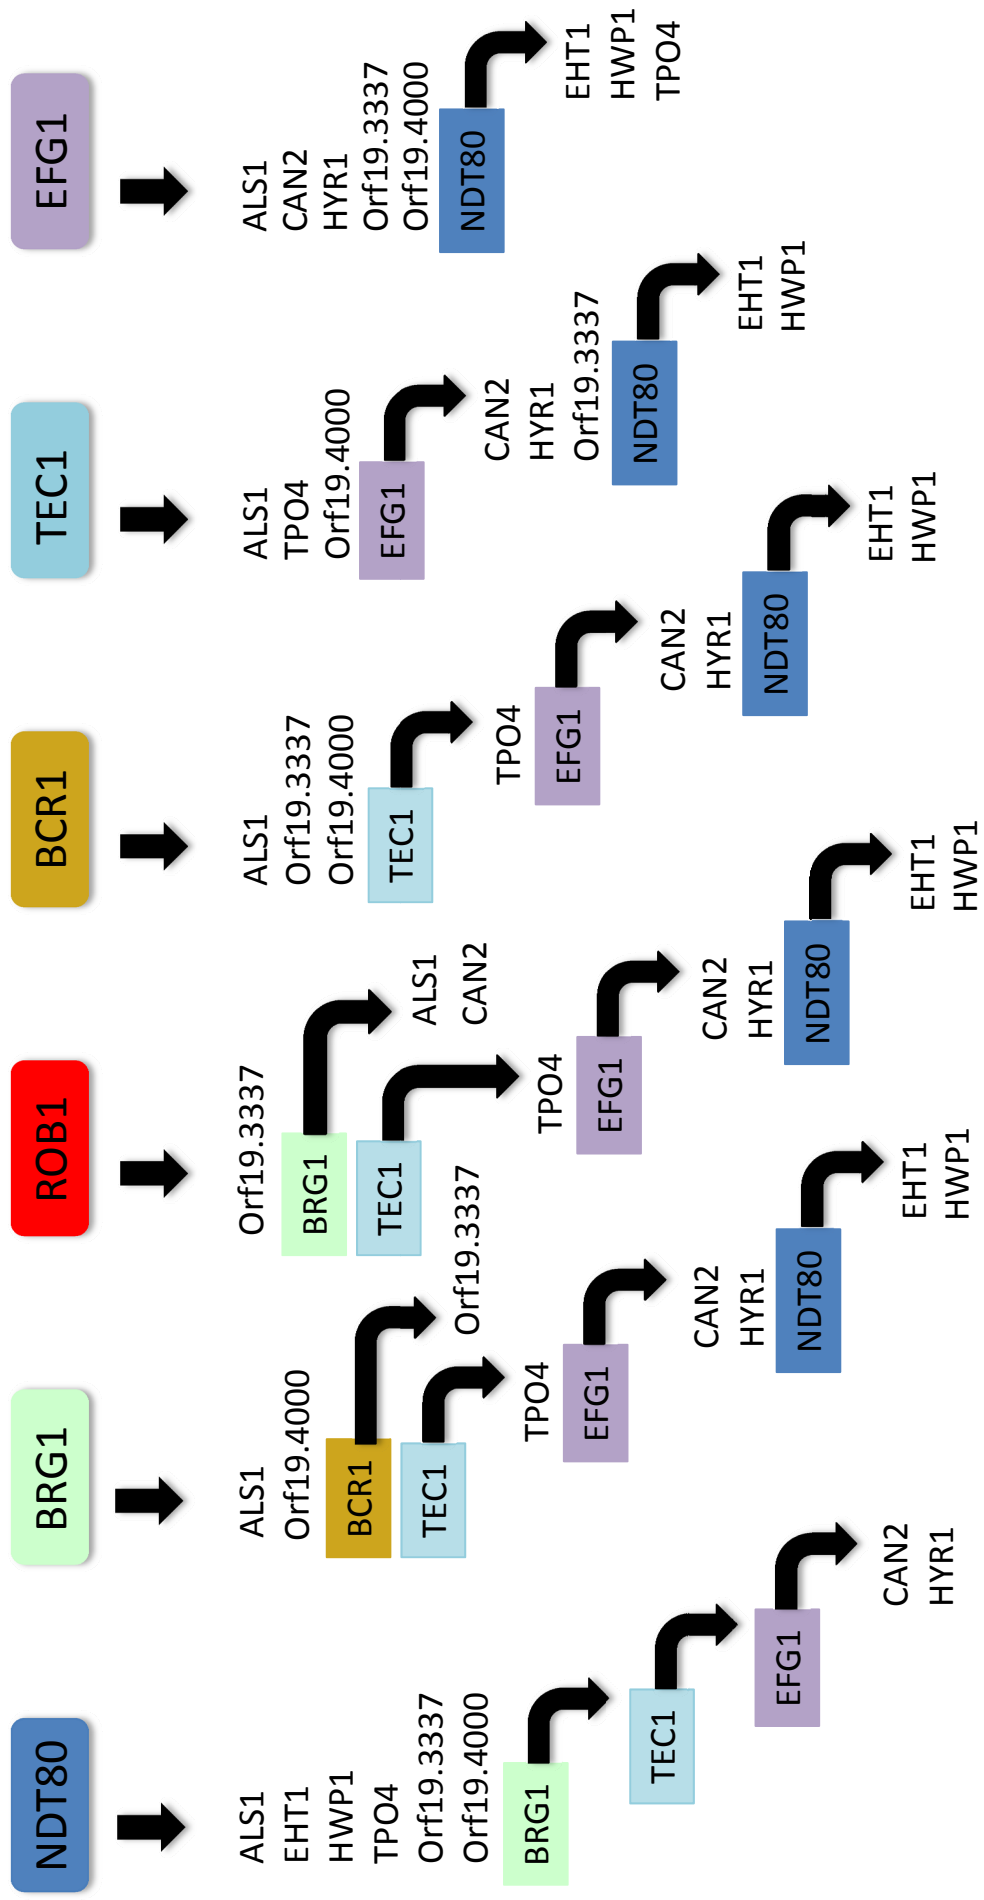

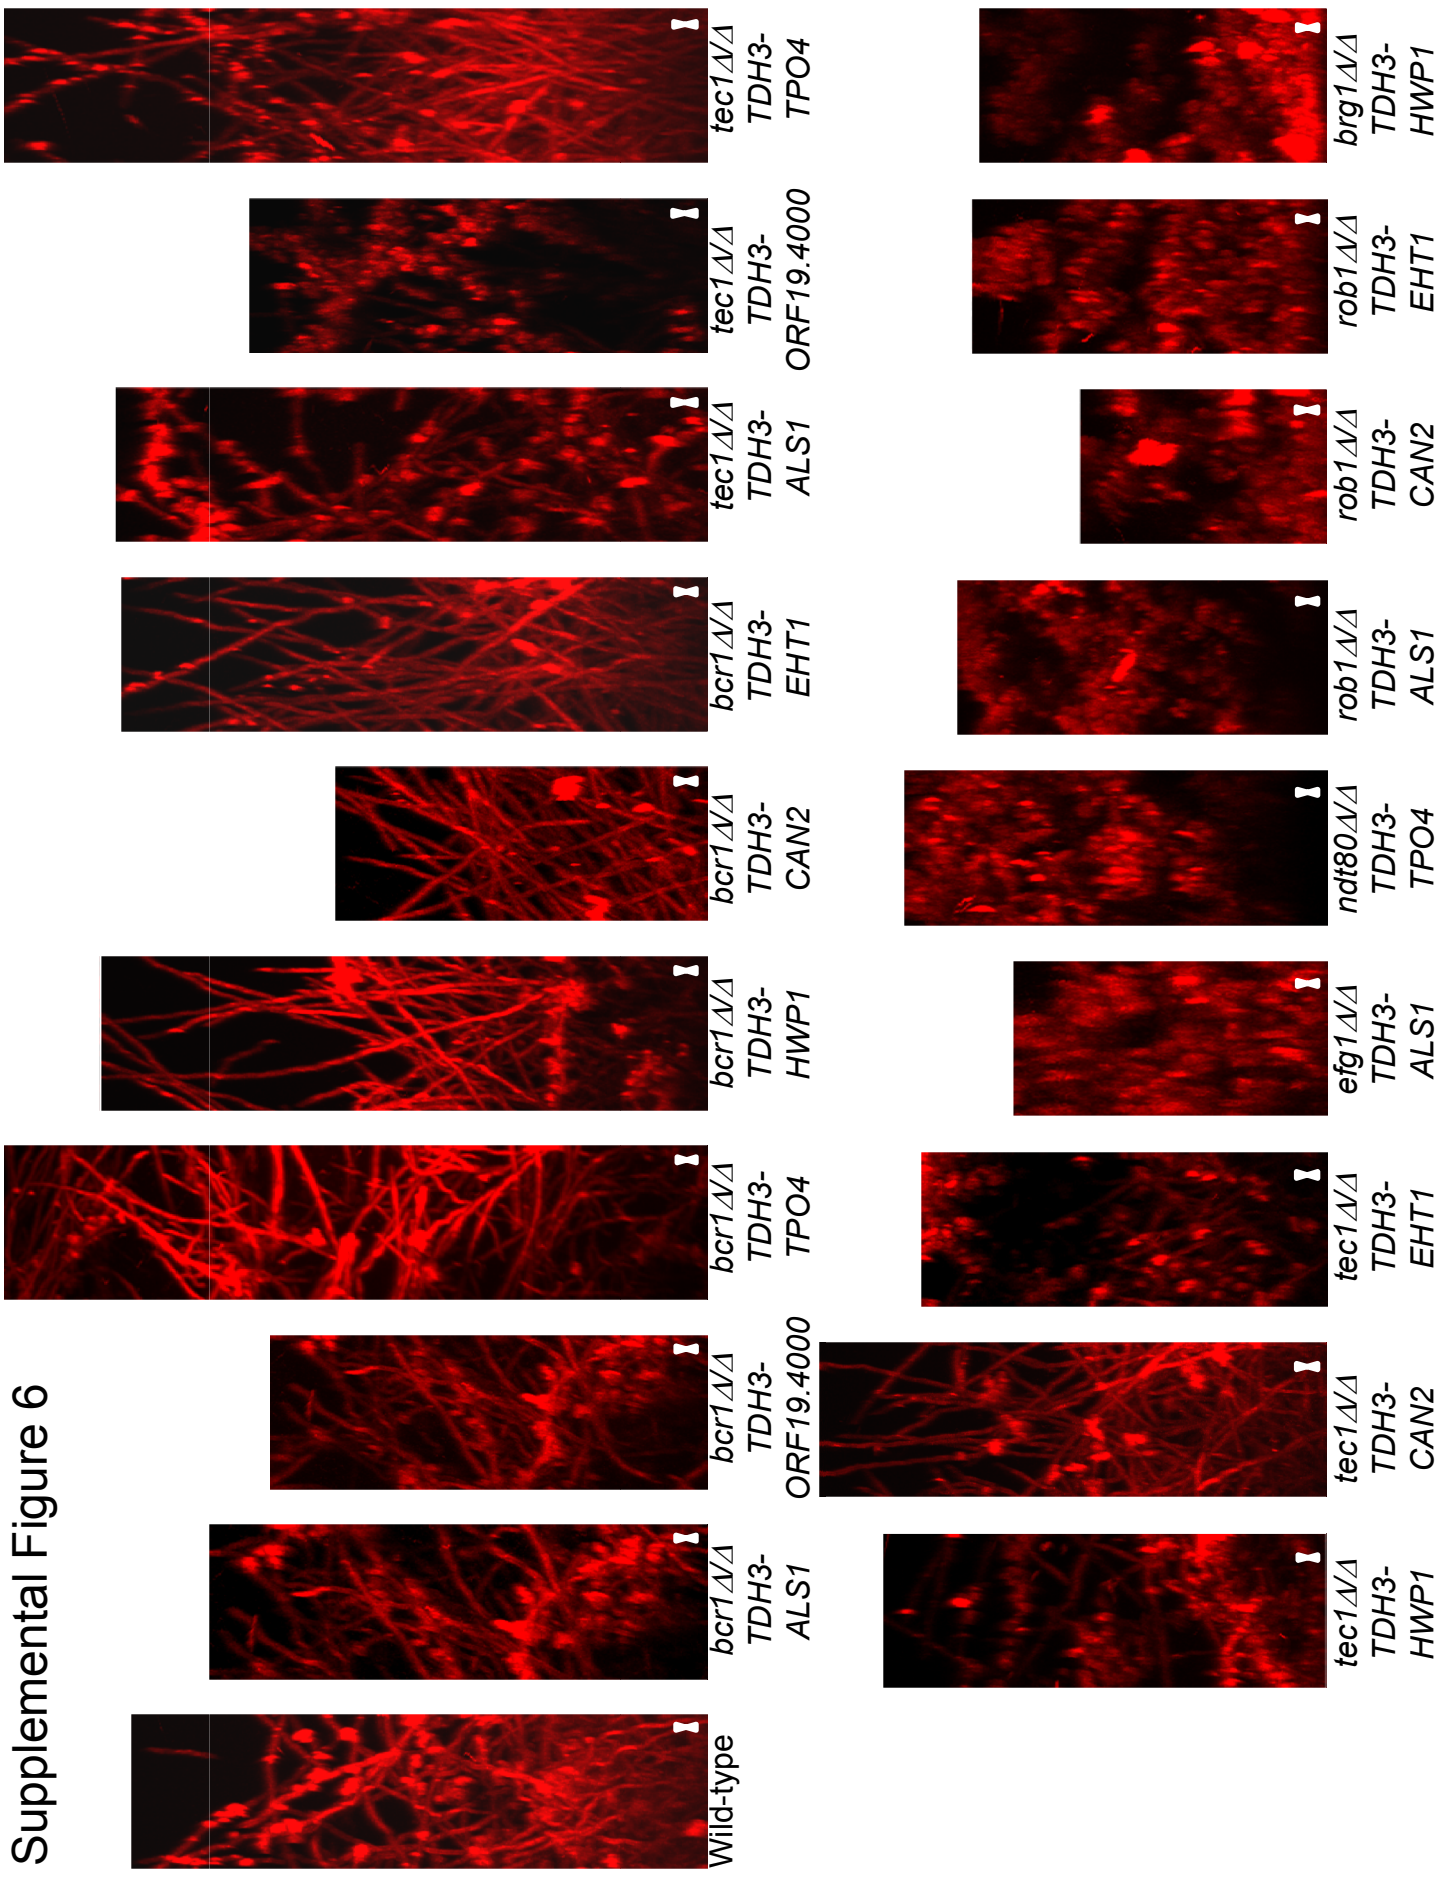

Supplemental Figure 7

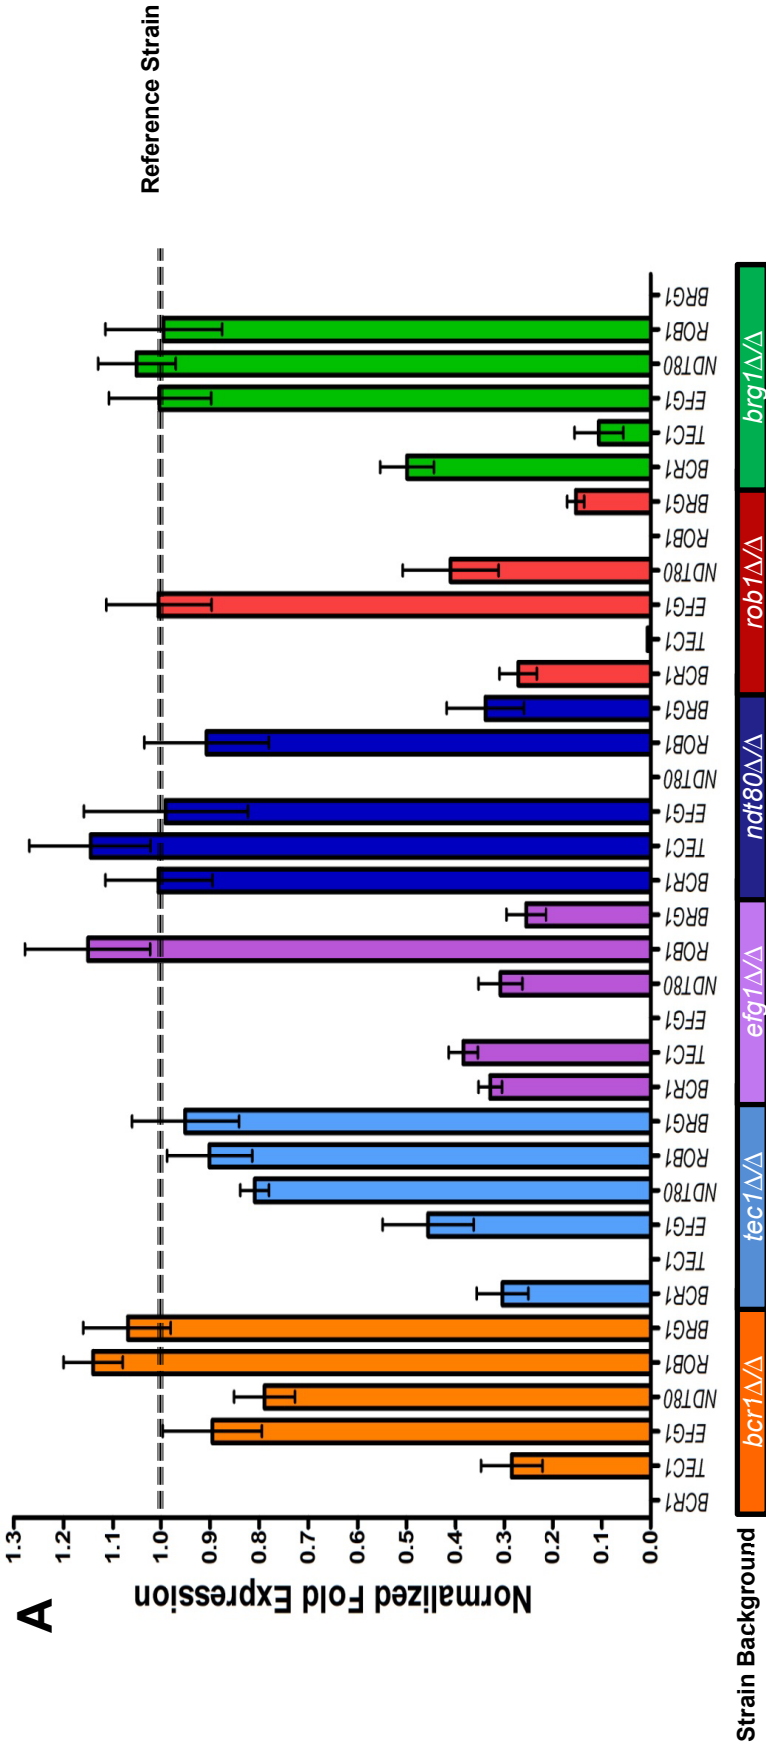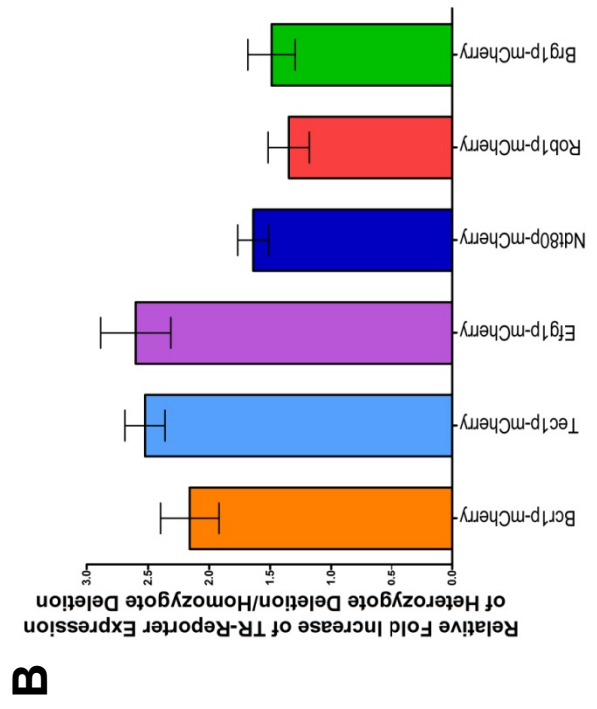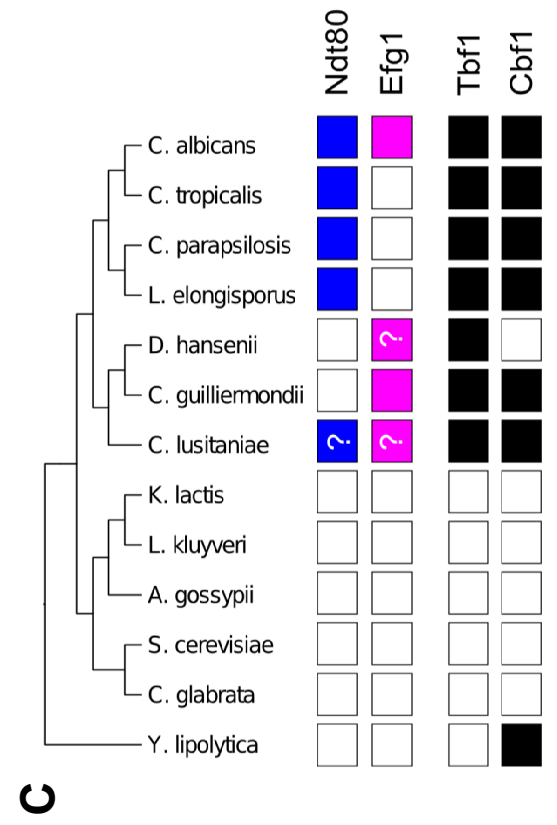

Supplement: NIHMS346589-supplement-02.pdf [file NIHMS346589-supplement-02.pdf]
